# Supplementary material for: Novel lncRNA Panel as for Prognosis in Esophageal Squamous Cell Carcinoma Based on ceRNA Network Mechanism
Source: Hindawi journal article supplement (doi:10.1155/2021/8020879), 2021-09-24
Supplement: f1 [file 8020879.f1.zip]

|            | logFC    | AveExpr  | t        | PValue   | FDR      | B        |
|------------|----------|----------|----------|----------|----------|----------|
| ZNF710-AS1 | -2.81579 | 8.947842 | -11.3274 | 1.09E-22 | 8.19E-19 | 40.71261 |
| AC119424.1 | -7.20325 | -0.3813  | -11.1635 | 3.21E-22 | 1.21E-18 | 39.35192 |
| AC116407.1 | -3.12611 | 5.790642 | -11.094  | 5.07E-22 | 1.27E-18 | 39.41053 |
| AL032819.2 | -3.54633 | 4.725081 | -10.5729 | 1.54E-20 | 2.90E-17 | 36.0595  |
| AC004836.1 | -5.84085 | 2.003717 | -10.5245 | 2.11E-20 | 3.18E-17 | 35.60586 |
| C9orf147   | -2.48213 | 6.316063 | -10.2023 | 1.71E-19 | 2.14E-16 | 33.66254 |
| AC012409.3 | -5.48454 | 1.381993 | -10.0827 | 3.71E-19 | 3.98E-16 | 32.69764 |
| AC025271.4 | -5.91438 | 0.235762 | -9.731   | 3.55E-18 | 3.33E-15 | 30.35751 |
| AC005920.4 | -5.40921 | 2.150169 | -9.29285 | 5.73E-17 | 4.31E-14 | 27.93903 |
| AC123912.4 | -5.87568 | 0.567013 | -9.29404 | 5.69E-17 | 4.31E-14 | 27.73685 |
| AP001148.1 | -2.69422 | 5.163215 | -9.06772 | 2.36E-16 | 1.60E-13 | 26.61232 |
| AC015908.3 | -3.3807  | 5.023219 | -9.05491 | 2.55E-16 | 1.60E-13 | 26.51768 |
| BX284668.2 | -3.48701 | 3.788215 | -8.99666 | 3.67E-16 | 2.12E-13 | 26.18149 |
| AL158847.1 | -4.97797 | 2.506416 | -8.86648 | 8.25E-16 | 4.43E-13 | 25.36765 |
| AC024337.2 | -3.63021 | 2.327624 | -8.72363 | 2.00E-15 | 1.00E-12 | 24.37585 |
| AL158163.2 | -1.7584  | 6.483382 | -8.68003 | 2.61E-15 | 1.20E-12 | 24.19438 |
| LINC00940  | -7.08558 | -1.59819 | -8.67315 | 2.72E-15 | 1.20E-12 | 23.38348 |
| AC093583.1 | -3.54573 | 3.358962 | -8.61251 | 3.95E-15 | 1.65E-12 | 23.84214 |
| AC239798.2 | -4.26307 | 1.31613  | -8.308   | 2.53E-14 | 1.00E-11 | 21.77447 |
| AL157392.2 | -4.57665 | 2.364328 | -8.20101 | 4.82E-14 | 1.81E-11 | 21.41953 |
| AP001528.3 | -2.22856 | 5.625095 | -8.10108 | 8.79E-14 | 3.00E-11 | 20.79132 |
| AC012409.5 | -3.42527 | 2.352883 | -8.10643 | 8.51E-14 | 3.00E-11 | 20.7572  |
| AC010998.3 | -5.38748 | 3.02501  | -7.99892 | 1.62E-13 | 5.28E-11 | 20.26313 |
| AP001528.2 | -2.11532 | 5.781392 | -7.97377 | 1.88E-13 | 5.88E-11 | 20.03961 |
| AC063919.1 | -6.84004 | -1.14898 | -7.91409 | 2.68E-13 | 8.05E-11 | 19.44459 |
| AC093797.1 | -3.20573 | 4.556365 | -7.89887 | 2.93E-13 | 8.47E-11 | 19.65705 |
| AC103563.2 | -6.65697 | 0.454781 | -7.76518 | 6.45E-13 | 1.79E-10 | 18.89785 |
| AC016251.1 | -3.10097 | 2.328906 | -7.46112 | 3.78E-12 | 1.02E-09 | 17.03256 |
| AC108472.1 | -4.16206 | 2.831457 | -7.44489 | 4.16E-12 | 1.08E-09 | 17.12454 |
| AC124312.3 | -3.56594 | 3.560222 | -7.39715 | 5.47E-12 | 1.37E-09 | 16.85396 |
| AC091563.1 | -2.76213 | 8.647079 | -7.32723 | 8.16E-12 | 1.98E-09 | 15.95273 |
| NGF-AS1    | -6.59867 | -2.57231 | -7.26577 | 1.16E-11 | 2.72E-09 | 15.18756 |
| LINC01996  | -4.99834 | 1.146572 | -7.2565  | 1.22E-11 | 2.78E-09 | 16.01335 |
| AC244453.3 | -5.54917 | 1.537374 | -7.19164 | 1.76E-11 | 3.88E-09 | 15.71939 |
| NCAM1-AS1  | -6.19986 | -1.44264 | -7.1875  | 1.81E-11 | 3.88E-09 | 15.1938  |
| LINC02489  | -6.15918 | 1.419889 | -7.17816 | 1.90E-11 | 3.97E-09 | 15.65559 |
| CADM3-AS1  | -3.5368  | 2.242452 | -7.14729 | 2.27E-11 | 4.60E-09 | 15.45941 |
| AL138847.2 | -2.82032 | 3.444798 | -7.12922 | 2.51E-11 | 4.96E-09 | 15.38737 |
| AL158206.1 | -2.13293 | 9.828721 | -7.10563 | 2.87E-11 | 5.52E-09 | 14.64508 |
| AC092834.1 | -5.75476 | 0.833465 | -7.01858 | 4.67E-11 | 8.77E-09 | 14.75533 |
| AC139749.1 | -3.18476 | 4.247475 | -6.99477 | 5.34E-11 | 9.78E-09 | 14.62218 |
| AP003117.1 | -3.86288 | 2.495696 | -6.91967 | 8.10E-11 | 1.45E-08 | 14.26262 |
| AP000907.2 | -4.87111 | 0.91399  | -6.90346 | 8.87E-11 | 1.51E-08 | 14.12524 |
| AL158163.1 | -1.28508 | 7.052086 | -6.90503 | 8.79E-11 | 1.51E-08 | 13.94836 |
| AP001972.5 | -2.29644 | 9.564367 | -6.88876 | 9.62E-11 | 1.61E-08 | 13.46376 |
| AC021016.2 | -1.2858  | 7.274137 | -6.87128 | 1.06E-10 | 1.73E-08 | 13.74576 |
| AC005725.1 | -3.8158  | 2.336381 | -6.80993 | 1.49E-10 | 2.37E-08 | 13.67253 |
| AC105074.1 | -1.97377 | 5.300014 | -6.72263 | 2.40E-10 | 3.75E-08 | 13.12029 |
| AC100830.1 | -1.36423 | 5.580657 | -6.67046 | 3.19E-10 | 4.88E-08 | 12.86344 |
| AC004982.1 | -2.2842  | 5.990165 | -6.65587 | 3.45E-10 | 5.18E-08 | 12.65846 |
| AC103746.1 | -2.55838 | 4.749416 | -6.65176 | 3.53E-10 | 5.19E-08 | 12.77724 |
| AC110609.1 | -4.73222 | 1.014462 | -6.58275 | 5.12E-10 | 7.40E-08 | 12.46819 |
| AL355388.1 | -4.38862 | 2.982993 | -6.55682 | 5.89E-10 | 8.35E-08 | 12.3386  |
| AC015967.1 | -4.53982 | 1.262806 | -6.54248 | 6.37E-10 | 8.68E-08 | 12.26076 |
| AC053503.6 | -4.05635 | 1.944362 | -6.53501 | 6.63E-10 | 8.68E-08 | 12.24825 |
| AL512328.1 | -4.47128 | 2.792816 | -6.53347 | 6.68E-10 | 8.68E-08 | 12.23381 |
| SPIN4-AS1  | -4.88232 | 0.43522  | -6.54197 | 6.38E-10 | 8.68E-08 | 12.22986 |

|            |          |          |          |          |          |          |
|------------|----------|----------|----------|----------|----------|----------|
| AC073862.3 | -5.36091 | -0.17293 | -6.53292 | 6.70E-10 | 8.68E-08 | 12.04932 |
| AC011379.1 | -1.87035 | 4.800833 | -6.50595 | 7.74E-10 | 9.86E-08 | 12.05495 |
| AC103563.7 | -5.4748  | 1.443852 | -6.49479 | 8.22E-10 | 1.03E-07 | 12.04469 |
| AC091057.3 | -2.85867 | 3.201258 | -6.48431 | 8.70E-10 | 1.07E-07 | 11.99235 |
| AC079061.1 | -4.45806 | 1.303036 | -6.46683 | 9.55E-10 | 1.16E-07 | 11.82578 |
| C8orf49    | -4.69666 | 3.182084 | -6.42616 | 1.19E-09 | 1.41E-07 | 11.65403 |
| AL049869.2 | -5.68446 | -0.25309 | -6.35851 | 1.70E-09 | 1.99E-07 | 11.2076  |
| AC053503.4 | -5.40056 | 1.656928 | -6.34547 | 1.82E-09 | 2.10E-07 | 11.28162 |
| AC012085.2 | -2.03624 | 3.894057 | -6.32937 | 1.98E-09 | 2.26E-07 | 11.20239 |
| LINC02447  | -1.53479 | 3.892786 | -6.16288 | 4.74E-09 | 5.31E-07 | 10.37396 |
| AL590004.3 | -3.19308 | 3.92622  | -6.12926 | 5.64E-09 | 6.23E-07 | 10.15657 |
| AP001094.2 | -1.76463 | 4.247359 | -6.11718 | 6.00E-09 | 6.54E-07 | 10.13588 |
| AC113398.2 | -5.06015 | -0.0543  | -6.07249 | 7.56E-09 | 8.12E-07 | 9.833174 |
| AC091544.5 | -5.01975 | 0.94728  | -6.06505 | 7.86E-09 | 8.20E-07 | 9.874078 |
| AC013726.1 | -3.47315 | 1.51183  | -6.0652  | 7.85E-09 | 8.20E-07 | 9.808509 |
| AL132642.1 | -3.23873 | 3.795823 | -6.03582 | 9.13E-09 | 9.40E-07 | 9.675702 |
| LINC01783  | -3.50665 | 2.097831 | -6.03275 | 9.27E-09 | 9.42E-07 | 9.728834 |
| AL031429.2 | -5.45481 | 0.398529 | -6.01666 | 1.01E-08 | 1.01E-06 | 9.625944 |
| AC022558.2 | -3.9512  | 1.626843 | -5.99036 | 1.15E-08 | 1.14E-06 | 9.509233 |
| AL355073.1 | -3.59442 | 2.851981 | -5.95617 | 1.37E-08 | 1.34E-06 | 9.351778 |
| FAM225A    | 4.156229 | 3.262988 | 5.907301 | 1.76E-08 | 1.69E-06 | 7.589251 |
| AC007193.2 | -4.30342 | 2.589374 | -5.83374 | 2.55E-08 | 2.42E-06 | 8.75027  |
| AC021766.1 | -4.01535 | 1.363892 | -5.81375 | 2.82E-08 | 2.64E-06 | 8.679968 |
| C15orf54   | 5.343776 | 1.828303 | 5.806356 | 2.92E-08 | 2.71E-06 | 6.831869 |
| AC099850.3 | 2.646278 | 11.43825 | 5.796643 | 3.07E-08 | 2.81E-06 | 8.131637 |
| AL133355.1 | -1.27252 | 8.061349 | -5.76795 | 3.54E-08 | 3.20E-06 | 7.975202 |
| AC139769.2 | -3.43408 | 2.536717 | -5.75249 | 3.82E-08 | 3.42E-06 | 8.395503 |
| AC025279.1 | -1.4837  | 3.934368 | -5.7249  | 4.39E-08 | 3.88E-06 | 8.271298 |
| IDH2-DT    | -4.52748 | 2.052652 | -5.70805 | 4.77E-08 | 4.17E-06 | 8.190754 |
| AC246680.1 | -6.17789 | -1.4544  | -5.69467 | 5.09E-08 | 4.40E-06 | 7.874605 |
| LINC01985  | -4.58747 | 1.082626 | -5.66368 | 5.94E-08 | 5.04E-06 | 7.981591 |
| AC019294.2 | 4.233832 | 2.767932 | 5.662537 | 5.97E-08 | 5.04E-06 | 6.540621 |
| AL158212.3 | -1.07743 | 8.30364  | -5.65785 | 6.11E-08 | 5.10E-06 | 7.432634 |
| AL023973.1 | -3.3307  | 2.729176 | -5.64328 | 6.56E-08 | 5.42E-06 | 7.881371 |
| LINC02352  | -1.25042 | 5.965291 | -5.62617 | 7.14E-08 | 5.83E-06 | 7.592113 |
| LINC02185  | -2.61921 | 3.909642 | -5.61062 | 7.71E-08 | 6.23E-06 | 7.661996 |
| TUSC8      | -5.76611 | 0.016554 | -5.60692 | 7.85E-08 | 6.27E-06 | 7.665531 |
| AC005180.2 | -2.68176 | 4.946427 | -5.59209 | 8.44E-08 | 6.67E-06 | 7.422874 |
| AC005225.4 | -1.47624 | 5.317754 | -5.57536 | 9.16E-08 | 7.17E-06 | 7.407212 |
| AP005717.1 | -2.20174 | 3.672011 | -5.55465 | 1.01E-07 | 7.76E-06 | 7.466065 |
| AC023794.6 | -1.35873 | 4.748656 | -5.55268 | 1.02E-07 | 7.76E-06 | 7.415207 |
| AC114810.1 | -1.31783 | 6.194384 | -5.55409 | 1.02E-07 | 7.76E-06 | 7.207094 |
| AL136164.3 | -1.7023  | 4.988421 | -5.53875 | 1.09E-07 | 8.22E-06 | 7.277408 |
| AP003059.1 | -3.43395 | 3.144151 | -5.5343  | 1.12E-07 | 8.32E-06 | 7.330864 |
| AC073842.1 | -3.3441  | 3.209226 | -5.52494 | 1.17E-07 | 8.52E-06 | 7.286629 |
| AC009078.3 | -1.1354  | 6.272673 | -5.52348 | 1.18E-07 | 8.52E-06 | 7.067425 |
| AL109936.2 | -1.5011  | 6.404837 | -5.52336 | 1.18E-07 | 8.52E-06 | 7.007591 |
| AC129492.3 | -6.097   | -0.44844 | -5.52104 | 1.19E-07 | 8.53E-06 | 7.247011 |
| AC012409.1 | -3.84876 | 2.469081 | -5.5164  | 1.22E-07 | 8.65E-06 | 7.294697 |
| TRG-AS1    | -1.67898 | 5.678001 | -5.49306 | 1.37E-07 | 9.59E-06 | 6.966873 |
| RPL34-AS1  | -1.99807 | 3.054051 | -5.47368 | 1.50E-07 | 1.04E-05 | 7.107763 |
| AC007637.1 | -2.61016 | 6.50886  | -5.4516  | 1.67E-07 | 1.15E-05 | 6.553628 |
| AC079210.1 | -2.89087 | 5.636284 | -5.44935 | 1.69E-07 | 1.15E-05 | 6.641817 |
| AP001972.1 | -2.89234 | 4.335416 | -5.43154 | 1.84E-07 | 1.24E-05 | 6.76165  |
| AL158212.1 | -3.38773 | 2.804403 | -5.42662 | 1.88E-07 | 1.26E-05 | 6.871341 |
| AC244453.1 | -5.57888 | -0.53523 | -5.40398 | 2.10E-07 | 1.39E-05 | 6.696008 |
| MAGI1-AS1  | -2.5643  | 4.46957  | -5.37484 | 2.41E-07 | 1.59E-05 | 6.499604 |
| AC011504.1 | -4.28677 | -0.47157 | -5.36349 | 2.54E-07 | 1.65E-05 | 6.370611 |

|            |          |          |          |          |          |          |
|------------|----------|----------|----------|----------|----------|----------|
| SEMA3B-AS1 | -2.2774  | 7.287554 | -5.365   | 2.52E-07 | 1.65E-05 | 6.066192 |
| AC079331.1 | -1.73304 | 5.383992 | -5.35367 | 2.66E-07 | 1.71E-05 | 6.362792 |
| LINC00365  | -2.97313 | 4.855835 | -5.34182 | 2.82E-07 | 1.79E-05 | 6.286173 |
| HCG21      | -4.85469 | 1.114339 | -5.32738 | 3.02E-07 | 1.91E-05 | 6.455737 |
| AC132154.1 | -5.53748 | -1.5455  | -5.29584 | 3.50E-07 | 2.19E-05 | 5.994194 |
| AL138808.1 | -4.7608  | 0.929234 | -5.29001 | 3.60E-07 | 2.22E-05 | 6.290586 |
| LINC01593  | -6.00851 | -0.58532 | -5.29122 | 3.58E-07 | 2.22E-05 | 6.237038 |
| NCOA7-AS1  | -4.61418 | 1.509321 | -5.25149 | 4.32E-07 | 2.64E-05 | 6.126831 |
| AC012313.5 | -1.25735 | 6.587916 | -5.24008 | 4.55E-07 | 2.76E-05 | 5.701062 |
| AC130371.2 | -1.66489 | 7.081406 | -5.23588 | 4.64E-07 | 2.79E-05 | 5.564357 |
| AC008669.1 | -1.25811 | 6.995036 | -5.22379 | 4.91E-07 | 2.93E-05 | 5.567929 |
| AF001548.3 | -2.37488 | 4.438774 | -5.21248 | 5.18E-07 | 3.07E-05 | 5.777706 |
| AC010478.1 | -3.93265 | 1.503576 | -5.20275 | 5.42E-07 | 3.18E-05 | 5.908644 |
| LINC00261  | -4.76598 | 4.585306 | -5.20125 | 5.46E-07 | 3.18E-05 | 5.576092 |
| ENOX1-AS1  | -2.4457  | 2.268886 | -5.1954  | 5.61E-07 | 3.24E-05 | 5.848053 |
| AC024075.1 | -1.02909 | 9.427961 | -5.17936 | 6.05E-07 | 3.47E-05 | 5.069109 |
| AC091544.4 | -2.52507 | 3.365617 | -5.16985 | 6.32E-07 | 3.60E-05 | 5.738234 |
| FAM13A-AS1 | -1.0465  | 6.696415 | -5.1671  | 6.40E-07 | 3.62E-05 | 5.381573 |
| AC244131.2 | -3.8942  | 1.544917 | -5.16248 | 6.54E-07 | 3.67E-05 | 5.740321 |
| AC005274.1 | -2.92425 | 3.67412  | -5.15993 | 6.62E-07 | 3.68E-05 | 5.618632 |
| AC002116.2 | 1.739382 | 7.626682 | 5.157761 | 6.68E-07 | 3.69E-05 | 5.576026 |
| AC129492.5 | -3.25695 | 2.738021 | -5.15596 | 6.74E-07 | 3.70E-05 | 5.686346 |
| LINC02593  | -1.7483  | 5.518044 | -5.15143 | 6.88E-07 | 3.75E-05 | 5.40073  |
| LINC02435  | -4.03935 | 2.307976 | -5.14854 | 6.98E-07 | 3.77E-05 | 5.663616 |
| PCAT18     | -5.57147 | -0.80237 | -5.13338 | 7.48E-07 | 4.02E-05 | 5.439697 |
| ZNF30-AS1  | -4.06804 | 1.115483 | -5.12335 | 7.84E-07 | 4.18E-05 | 5.567776 |
| AC018511.2 | -4.19729 | 1.168791 | -5.11998 | 7.96E-07 | 4.21E-05 | 5.557651 |
| NKAIN3-IT1 | -3.54735 | 0.891748 | -5.11579 | 8.12E-07 | 4.26E-05 | 5.512486 |
| AP000866.2 | -1.50883 | 6.598141 | -5.1129  | 8.22E-07 | 4.29E-05 | 5.096813 |
| AL136309.2 | -1.81307 | 3.940227 | -5.09221 | 9.05E-07 | 4.69E-05 | 5.414819 |
| AL008733.1 | -5.57572 | 0.292527 | -5.05145 | 1.09E-06 | 5.61E-05 | 5.251051 |
| AC092667.1 | -5.21058 | -1.92759 | -5.0374  | 1.16E-06 | 5.94E-05 | 4.879105 |
| AL035701.1 | -3.35874 | 3.474349 | -5.03189 | 1.19E-06 | 6.05E-05 | 5.045054 |
| AC118344.2 | -0.91012 | 7.866186 | -5.01811 | 1.27E-06 | 6.40E-05 | 4.57484  |
| AC138819.1 | -5.32427 | -0.24213 | -5.01622 | 1.28E-06 | 6.41E-05 | 5.050928 |
| AL354836.1 | 1.39212  | 10.20947 | 5.003541 | 1.36E-06 | 6.75E-05 | 4.458387 |
| AC012317.1 | -4.47734 | 2.154639 | -4.98341 | 1.49E-06 | 7.35E-05 | 4.936138 |
| AC103853.2 | -3.39437 | 2.004348 | -4.97812 | 1.52E-06 | 7.47E-05 | 4.952005 |
| AC018926.1 | -1.07421 | 6.615641 | -4.96888 | 1.59E-06 | 7.74E-05 | 4.514307 |
| SH3BP5-AS1 | -1.06709 | 8.288226 | -4.96344 | 1.63E-06 | 7.88E-05 | 4.260959 |
| ELN-AS1    | -2.44923 | 6.112536 | -4.94662 | 1.75E-06 | 8.40E-05 | 4.350916 |
| AL031587.5 | -1.76564 | 8.328168 | -4.94667 | 1.75E-06 | 8.40E-05 | 4.107658 |
| LINC01644  | -3.86343 | 1.995098 | -4.94437 | 1.77E-06 | 8.43E-05 | 4.803299 |
| AC099521.2 | -2.32376 | 4.942813 | -4.93839 | 1.82E-06 | 8.61E-05 | 4.519265 |
| AC004988.1 | 7.002631 | 3.553374 | 4.935108 | 1.85E-06 | 8.68E-05 | 3.721756 |
| LINC01354  | -2.65746 | 2.500522 | -4.93166 | 1.88E-06 | 8.71E-05 | 4.759622 |
| AC048380.2 | -1.0428  | 5.914243 | -4.93265 | 1.87E-06 | 8.71E-05 | 4.468527 |
| SNHG3      | 1.308314 | 11.12816 | 4.915498 | 2.02E-06 | 9.30E-05 | 3.948535 |
| AC244453.2 | -3.26628 | 1.292036 | -4.9063  | 2.10E-06 | 9.63E-05 | 4.648313 |
| AC092718.4 | 1.378511 | 11.17417 | 4.905005 | 2.12E-06 | 9.63E-05 | 3.908937 |
| AC025470.2 | -5.36526 | -1.48447 | -4.90302 | 2.13E-06 | 9.66E-05 | 4.441949 |
| AC135012.3 | -2.47356 | 2.615476 | -4.88548 | 2.31E-06 | 0.000104 | 4.560628 |
| UGDH-AS1   | -0.82407 | 7.194516 | -4.87957 | 2.37E-06 | 0.000106 | 4.078375 |
| AC026401.3 | 1.691952 | 11.33023 | 4.873042 | 2.44E-06 | 0.000109 | 3.786934 |
| AL031846.2 | -1.02446 | 5.368286 | -4.86158 | 2.57E-06 | 0.000114 | 4.26974  |
| AC010480.1 | -2.60995 | 3.304019 | -4.84109 | 2.81E-06 | 0.000124 | 4.316953 |
| AL109659.2 | -2.33026 | 3.71531  | -4.83682 | 2.87E-06 | 0.000125 | 4.278722 |
| AP000437.1 | -0.87855 | 6.234202 | -4.83667 | 2.87E-06 | 0.000125 | 4.031417 |

|             |          |          |          |          |          |          |
|-------------|----------|----------|----------|----------|----------|----------|
| THRB-IT1    | -2.22084 | 4.65156  | -4.83367 | 2.91E-06 | 0.000126 | 4.118413 |
| AL133370.1  | -3.23239 | 5.516535 | -4.8323  | 2.93E-06 | 0.000126 | 3.875328 |
| AC012640.3  | -4.50607 | 1.032435 | -4.82014 | 3.09E-06 | 0.000132 | 4.302335 |
| FOXP1-AS1   | -1.33572 | 5.732277 | -4.81767 | 3.12E-06 | 0.000132 | 3.963731 |
| AC114546.1  | -5.22104 | -1.46411 | -4.79611 | 3.43E-06 | 0.000145 | 4.097372 |
| AC068491.3  | 2.412682 | 8.195111 | 4.783219 | 3.63E-06 | 0.000153 | 3.977285 |
| AC024075.2  | -0.8466  | 9.063612 | -4.77735 | 3.73E-06 | 0.000156 | 3.382032 |
| AC105345.1  | -1.16868 | 4.130033 | -4.76859 | 3.88E-06 | 0.000161 | 4.051272 |
| AC100861.1  | 1.606706 | 8.069248 | 4.767022 | 3.90E-06 | 0.000161 | 3.794431 |
| AC129507.2  | -3.42497 | 3.308057 | -4.76187 | 3.99E-06 | 0.000164 | 3.922797 |
| Z84484.1    | 6.193692 | 6.060832 | 4.75817  | 4.06E-06 | 0.000166 | 3.435344 |
| AL020997.2  | -2.83592 | 4.563643 | -4.75666 | 4.08E-06 | 0.000166 | 3.742692 |
| AC108215.1  | -2.27992 | 3.906561 | -4.75076 | 4.19E-06 | 0.000169 | 3.879385 |
| AC091544.2  | -3.24993 | 1.855378 | -4.73512 | 4.49E-06 | 0.00018  | 3.954797 |
| AC106876.1  | -4.98155 | 2.213833 | -4.72906 | 4.61E-06 | 0.000184 | 3.871718 |
| AC009974.1  | -3.35125 | 2.394502 | -4.72455 | 4.70E-06 | 0.000187 | 3.879451 |
| AC012073.1  | 1.371915 | 8.861805 | 4.718978 | 4.82E-06 | 0.00019  | 3.428088 |
| AC037459.2  | -0.91976 | 5.776078 | -4.69411 | 5.37E-06 | 0.000211 | 3.513977 |
| AC005495.1  | -2.87652 | 2.090592 | -4.68658 | 5.54E-06 | 0.000217 | 3.766015 |
| AC048380.3  | -3.36351 | 1.623496 | -4.67007 | 5.96E-06 | 0.000232 | 3.700497 |
| DNAJC9-AS1  | -1.12001 | 3.667733 | -4.65247 | 6.43E-06 | 0.000249 | 3.62784  |
| AL020997.3  | -1.52172 | 6.743334 | -4.64878 | 6.53E-06 | 0.000252 | 3.081173 |
| AL035448.1  | -1.17479 | 6.298826 | -4.63916 | 6.81E-06 | 0.000261 | 3.156775 |
| AL157996.1  | -2.89025 | 1.58335  | -4.61339 | 7.60E-06 | 0.00029  | 3.471744 |
| AP003059.2  | -4.30242 | 0.669453 | -4.60577 | 7.86E-06 | 0.000298 | 3.44143  |
| PSMD6-AS2   | -0.88658 | 6.445828 | -4.6011  | 8.02E-06 | 0.000303 | 3.014703 |
| ALDH1L1-AS2 | -3.95433 | -0.09987 | -4.5986  | 8.10E-06 | 0.000304 | 3.334447 |
| AC005332.2  | -1.66517 | 4.369336 | -4.59691 | 8.16E-06 | 0.000305 | 3.271617 |
| AP003355.2  | -3.8368  | -0.00878 | -4.59522 | 8.22E-06 | 0.000306 | 3.316645 |
| AC113189.4  | 4.587368 | 1.776268 | 4.585861 | 8.56E-06 | 0.000317 | 2.557832 |
| AC012557.1  | -0.86929 | 7.258775 | -4.57836 | 8.83E-06 | 0.000325 | 2.800726 |
| AL137793.1  | -4.72388 | 0.306566 | -4.57212 | 9.07E-06 | 0.000333 | 3.294549 |
| AL160286.2  | -2.91201 | 2.297885 | -4.56463 | 9.37E-06 | 0.000342 | 3.277277 |
| AC130456.2  | -3.70951 | 2.364778 | -4.56141 | 9.50E-06 | 0.000345 | 3.223826 |
| CYMP-AS1    | -4.46409 | -0.14277 | -4.55386 | 9.81E-06 | 0.000354 | 3.209729 |
| AC020659.1  | -1.5197  | 4.439921 | -4.5525  | 9.86E-06 | 0.000355 | 3.107008 |
| AL157834.2  | -2.77152 | 2.777473 | -4.55059 | 9.94E-06 | 0.000356 | 3.193369 |
| AC108463.2  | 7.562406 | 5.536411 | 4.549077 | 1.00E-05 | 0.000356 | 2.546769 |
| FOXD2-AS1   | 1.987452 | 9.039648 | 4.544378 | 1.02E-05 | 0.000362 | 2.779504 |
| Z97653.2    | -1.48986 | 5.184144 | -4.54084 | 1.04E-05 | 0.000366 | 2.88275  |
| CYP4A22-AS1 | 6.329043 | 6.439372 | 4.538832 | 1.05E-05 | 0.000367 | 2.710169 |
| AC025917.1  | -1.03493 | 7.277981 | -4.529   | 1.09E-05 | 0.000381 | 2.574604 |
| AC092127.1  | -1.16978 | 4.03839  | -4.5261  | 1.10E-05 | 0.000384 | 3.096904 |
| AP000708.1  | 5.322573 | 1.184877 | 4.516435 | 1.15E-05 | 0.000398 | 2.290537 |
| AC009119.3  | -2.19716 | 4.077668 | -4.50745 | 1.19E-05 | 0.000411 | 2.870033 |
| PWAR5       | -1.9109  | 5.219416 | -4.50088 | 1.23E-05 | 0.000421 | 2.687959 |
| AL031768.1  | -2.19174 | 4.485951 | -4.49228 | 1.27E-05 | 0.000433 | 2.761624 |
| AC098869.2  | -1.43839 | 7.126847 | -4.49215 | 1.27E-05 | 0.000433 | 2.402773 |
| TYMSOS      | 2.087604 | 8.542867 | 4.490192 | 1.28E-05 | 0.000434 | 2.645613 |
| LINC01050   | 9.434273 | 2.167308 | 4.486836 | 1.30E-05 | 0.000439 | 2.208415 |
| TMEM26-AS1  | 7.354857 | 1.239304 | 4.482523 | 1.33E-05 | 0.000445 | 2.182671 |
| AC135178.1  | -2.69108 | 3.072859 | -4.47793 | 1.35E-05 | 0.000451 | 2.868419 |
| PITPNM2-AS1 | -1.17702 | 4.47142  | -4.47196 | 1.39E-05 | 0.000457 | 2.813674 |
| AC021491.2  | -1.15327 | 5.751811 | -4.47182 | 1.39E-05 | 0.000457 | 2.591758 |
| AC026356.1  | 1.268734 | 8.259036 | 4.473406 | 1.38E-05 | 0.000457 | 2.507689 |
| LINC02595   | 2.632799 | 8.690624 | 4.469979 | 1.40E-05 | 0.000459 | 2.638262 |
| AC139887.4  | -0.96378 | 7.605661 | -4.46784 | 1.41E-05 | 0.000461 | 2.290844 |
| AC069544.1  | 1.253102 | 7.32703  | 4.462556 | 1.44E-05 | 0.000469 | 2.637591 |

|             |          |          |          |          |          |          |
|-------------|----------|----------|----------|----------|----------|----------|
| AL121584.1  | -4.89264 | -0.54191 | -4.44991 | 1.52E-05 | 0.000492 | 2.798899 |
| AC015921.1  | -1.66068 | 4.688222 | -4.44707 | 1.54E-05 | 0.000496 | 2.628665 |
| AJ006995.1  | -4.72524 | -0.63192 | -4.43683 | 1.61E-05 | 0.000515 | 2.754025 |
| LINC01560   | 0.996704 | 8.231166 | 4.434937 | 1.62E-05 | 0.000515 | 2.314439 |
| AP003486.1  | -0.97244 | 8.700085 | -4.43514 | 1.62E-05 | 0.000515 | 2.010188 |
| AC138956.2  | -0.95715 | 8.391778 | -4.43212 | 1.64E-05 | 0.000519 | 2.042698 |
| AC004637.1  | -2.25332 | 4.111571 | -4.41832 | 1.73E-05 | 0.000548 | 2.500672 |
| AC021205.3  | -1.53245 | 4.35103  | -4.41682 | 1.75E-05 | 0.000549 | 2.570809 |
| AC006942.1  | -1.14234 | 6.288525 | -4.41077 | 1.79E-05 | 0.00056  | 2.241466 |
| AL731557.1  | -5.19877 | -1.65658 | -4.40485 | 1.83E-05 | 0.000567 | 2.52976  |
| SLC12A5-AS1 | 4.964987 | 4.337655 | 4.406008 | 1.83E-05 | 0.000567 | 2.170493 |
| AL391834.2  | -1.00491 | 8.759388 | -4.40536 | 1.83E-05 | 0.000567 | 1.879067 |
| AL445309.1  | -1.25308 | 6.828774 | -4.4011  | 1.86E-05 | 0.000574 | 2.100629 |
| AL138930.1  | -4.56567 | 0.519336 | -4.39833 | 1.88E-05 | 0.000578 | 2.645606 |
| AC093607.1  | -4.79407 | 0.120629 | -4.39564 | 1.91E-05 | 0.000582 | 2.621249 |
| AGAP2-AS1   | 2.080937 | 10.55767 | 4.389614 | 1.95E-05 | 0.000594 | 1.932195 |
| MACROD2-AS1 | -4.30914 | -0.43717 | -4.35262 | 2.28E-05 | 0.00069  | 2.409881 |
| LINC01637   | 1.928302 | 8.318692 | 4.348248 | 2.32E-05 | 0.000699 | 2.099752 |
| AL662797.1  | 1.234647 | 7.079763 | 4.345826 | 2.34E-05 | 0.000704 | 2.202427 |
| AC006946.3  | -2.91034 | 3.141817 | -4.3335  | 2.46E-05 | 0.000737 | 2.259359 |
| GLYCTK-AS1  | -1.46304 | 4.183062 | -4.33054 | 2.49E-05 | 0.000743 | 2.293157 |
| AC136469.1  | -0.97807 | 5.694059 | -4.32407 | 2.56E-05 | 0.00076  | 2.03664  |
| CACNA1C-AS2 | -2.30652 | 3.912331 | -4.321   | 2.59E-05 | 0.000767 | 2.165068 |
| AC012181.1  | -1.17876 | 7.191069 | -4.31555 | 2.65E-05 | 0.000781 | 1.721876 |
| AC010300.1  | -1.59387 | 5.109653 | -4.31342 | 2.67E-05 | 0.000785 | 1.995434 |
| AP002433.1  | -2.94338 | 1.81581  | -4.31077 | 2.70E-05 | 0.00079  | 2.323709 |
| AC079331.2  | -1.09662 | 5.977903 | -4.29935 | 2.83E-05 | 0.000825 | 1.876517 |
| TSC22D1-AS1 | -0.86712 | 6.472207 | -4.29726 | 2.86E-05 | 0.000829 | 1.800425 |
| AC087721.1  | 8.374578 | 4.388699 | 4.29348  | 2.90E-05 | 0.000838 | 1.629009 |
| AC004491.1  | 2.767856 | 4.366002 | 4.28649  | 2.98E-05 | 0.000859 | 1.994461 |
| AC073476.3  | -1.01412 | 4.583052 | -4.27276 | 3.16E-05 | 0.000905 | 2.068195 |
| AP000781.1  | 2.165695 | 6.815286 | 4.266375 | 3.24E-05 | 0.000925 | 2.082868 |
| AC111182.1  | -1.55789 | 3.436037 | -4.26006 | 3.32E-05 | 0.000946 | 2.106994 |
| AC136604.2  | -0.68706 | 6.675574 | -4.25442 | 3.40E-05 | 0.000964 | 1.628326 |
| AC027237.4  | -2.7356  | 2.804088 | -4.24442 | 3.54E-05 | 0.000993 | 2.022238 |
| AC011816.2  | -2.45265 | 3.390944 | -4.2445  | 3.54E-05 | 0.000993 | 1.959586 |
| AL118508.2  | 5.156978 | 2.660821 | 4.245184 | 3.53E-05 | 0.000993 | 1.51178  |
| AC022031.1  | 7.447069 | -0.64945 | 4.236632 | 3.65E-05 | 0.00102  | 1.407166 |
| AL359715.4  | -1.97456 | 6.133047 | -4.23307 | 3.71E-05 | 0.001031 | 1.476623 |
| AC091825.1  | -0.81686 | 6.21635  | -4.22397 | 3.85E-05 | 0.001066 | 1.585928 |
| PACRG-AS1   | -4.36654 | -1.35478 | -4.21713 | 3.95E-05 | 0.001092 | 1.848699 |
| AC084026.2  | -3.58886 | 2.375736 | -4.20968 | 4.07E-05 | 0.001117 | 1.897222 |
| Z69706.1    | -1.08191 | 6.51691  | -4.21008 | 4.07E-05 | 0.001117 | 1.43138  |
| AL512383.1  | -3.66625 | 1.259974 | -4.20691 | 4.12E-05 | 0.001121 | 1.945862 |
| GSN-AS1     | -0.91892 | 6.199081 | -4.20731 | 4.11E-05 | 0.001121 | 1.497897 |
| AC010776.2  | -5.24834 | -1.73631 | -4.20318 | 4.18E-05 | 0.001134 | 1.803398 |
| AC024075.3  | -0.86532 | 8.708365 | -4.19789 | 4.27E-05 | 0.001154 | 1.095267 |
| SEMA3F-AS1  | -0.67997 | 6.981647 | -4.19579 | 4.31E-05 | 0.001157 | 1.354814 |
| AC011472.4  | -0.90377 | 6.901501 | -4.1954  | 4.31E-05 | 0.001157 | 1.331509 |
| LINC01625   | -4.70759 | -1.56011 | -4.19256 | 4.36E-05 | 0.001166 | 1.763974 |
| LINC01873   | 5.348645 | 4.002382 | 4.189328 | 4.42E-05 | 0.001177 | 1.432742 |
| AL137060.1  | 2.605031 | 4.718728 | 4.188196 | 4.44E-05 | 0.001179 | 1.732967 |
| AC013391.2  | 7.668755 | 1.928842 | 4.185584 | 4.49E-05 | 0.001187 | 1.271018 |
| AC245100.6  | 6.722839 | 1.509369 | 4.18115  | 4.57E-05 | 0.001204 | 1.253217 |
| AP001107.5  | -1.98764 | 4.426909 | -4.16336 | 4.90E-05 | 0.001288 | 1.507203 |
| AC100823.1  | -4.49629 | 0.55731  | -4.15896 | 4.99E-05 | 0.001306 | 1.773379 |
| AC022173.1  | -2.5046  | 3.036243 | -4.15708 | 5.03E-05 | 0.00131  | 1.671379 |
| AC012181.2  | -1.146   | 7.160354 | -4.15648 | 5.04E-05 | 0.00131  | 1.12594  |

|             |          |          |          |          |          |          |
|-------------|----------|----------|----------|----------|----------|----------|
| STK32A-AS1  | -4.90924 | -0.94724 | -4.15367 | 5.10E-05 | 0.001316 | 1.705212 |
| AC008121.2  | -2.91853 | 2.512418 | -4.15411 | 5.09E-05 | 0.001316 | 1.702012 |
| AC010632.1  | -3.47333 | 1.482784 | -4.14695 | 5.23E-05 | 0.001347 | 1.720449 |
| AC022893.1  | -0.9126  | 7.054372 | -4.13996 | 5.38E-05 | 0.00138  | 1.102618 |
| AC104958.1  | -2.89341 | 1.758288 | -4.13576 | 5.47E-05 | 0.001398 | 1.683988 |
| AC022211.3  | 1.398178 | 8.92256  | 4.133002 | 5.53E-05 | 0.001409 | 1.099009 |
| AC004817.3  | 5.951601 | 3.229931 | 4.130695 | 5.58E-05 | 0.001414 | 1.156841 |
| AC102945.2  | -1.40777 | 7.59014  | -4.13038 | 5.59E-05 | 0.001414 | 0.923542 |
| AC010761.2  | 0.830064 | 8.817872 | 4.123999 | 5.73E-05 | 0.001445 | 1.001    |
| AC009102.2  | -3.88233 | 0.184303 | -4.11261 | 6.00E-05 | 0.001507 | 1.586995 |
| MELTF-AS1   | 1.876807 | 9.162519 | 4.109671 | 6.07E-05 | 0.001519 | 1.042585 |
| LINC01623   | 5.543451 | -0.61197 | 4.106059 | 6.15E-05 | 0.001536 | 1.015779 |
| AL390208.1  | -1.03941 | 6.802645 | -4.10437 | 6.19E-05 | 0.001541 | 0.990462 |
| AC005520.2  | -1.14453 | 7.91098  | -4.09657 | 6.39E-05 | 0.001584 | 0.794638 |
| AC112236.2  | -1.07139 | 5.951862 | -4.08953 | 6.57E-05 | 0.001617 | 1.091542 |
| EPB41L4A-DT | -1.27971 | 6.898056 | -4.08963 | 6.57E-05 | 0.001617 | 0.892114 |
| AC018926.3  | -1.3991  | 7.077337 | -4.08878 | 6.59E-05 | 0.001617 | 0.858195 |
| AL138960.1  | -4.3704  | 0.105055 | -4.07556 | 6.94E-05 | 0.001687 | 1.475965 |
| AC004948.1  | -2.50621 | 3.268986 | -4.0757  | 6.93E-05 | 0.001687 | 1.334673 |
| AC091588.3  | -2.50854 | 5.293709 | -4.07637 | 6.92E-05 | 0.001687 | 0.981664 |
| LINC02331   | -4.9977  | -1.10739 | -4.0718  | 7.04E-05 | 0.001707 | 1.430093 |
| AC002525.1  | -2.13956 | 3.766268 | -4.06943 | 7.11E-05 | 0.001717 | 1.295116 |
| AC083843.4  | -1.10853 | 6.29051  | -4.06822 | 7.14E-05 | 0.00172  | 0.934887 |
| AC015912.3  | 1.515331 | 9.415593 | 4.06538  | 7.22E-05 | 0.001733 | 0.781817 |
| AL023802.1  | 5.25505  | 0.010709 | 4.054622 | 7.53E-05 | 0.001802 | 0.867067 |
| AC020779.2  | -3.78855 | 1.466873 | -4.05363 | 7.56E-05 | 0.001803 | 1.393047 |
| AC010261.1  | -2.87163 | 2.606102 | -4.05047 | 7.65E-05 | 0.00182  | 1.303413 |
| AC099850.1  | 1.152181 | 7.173591 | 4.048264 | 7.72E-05 | 0.001824 | 1.072423 |
| TMPO-AS1    | 1.586814 | 8.460835 | 4.048786 | 7.71E-05 | 0.001824 | 0.895714 |
| AC007792.1  | -2.44102 | 3.56242  | -4.036   | 8.10E-05 | 0.001908 | 1.157931 |
| AC007671.1  | -3.55486 | 0.982378 | -4.03036 | 8.28E-05 | 0.001944 | 1.320295 |
| AC012409.2  | -4.58401 | -0.57893 | -4.02588 | 8.42E-05 | 0.001972 | 1.2678   |
| LINC01124   | -2.3415  | 4.686878 | -4.02177 | 8.56E-05 | 0.001997 | 0.91297  |
| LINC01633   | 9.075744 | 3.937633 | 4.021053 | 8.58E-05 | 0.001997 | 0.801101 |
| AC009630.2  | 5.688099 | 2.61129  | 4.009003 | 9.00E-05 | 0.002086 | 0.771969 |
| AC079305.3  | -4.13387 | 1.987514 | -4.00247 | 9.23E-05 | 0.002133 | 1.048953 |
| AC011511.5  | 3.324465 | 4.015485 | 3.990924 | 9.65E-05 | 0.002223 | 0.945218 |
| AC104825.1  | -1.1861  | 8.033107 | -3.98719 | 9.79E-05 | 0.002249 | 0.358119 |
| SLC12A9-AS1 | 1.385426 | 8.521312 | 3.985214 | 9.86E-05 | 0.002259 | 0.609461 |
| AC090950.2  | -1.47465 | 4.624759 | -3.98376 | 9.92E-05 | 0.002265 | 0.903747 |
| AC018445.4  | -1.46247 | 3.933434 | -3.98266 | 9.96E-05 | 0.002268 | 1.026429 |
| MIR181A2HG  | 1.452709 | 7.224359 | 3.980622 | 0.0001   | 0.002279 | 0.869691 |
| AC091059.2  | -2.73305 | 2.750248 | -3.96901 | 0.000105 | 0.002376 | 1.02187  |
| AL357033.4  | -1.43556 | 8.346929 | -3.96435 | 0.000107 | 0.002412 | 0.212365 |
| AC114980.1  | -0.71505 | 5.967397 | -3.96169 | 0.000108 | 0.002429 | 0.663616 |
| AL121832.2  | 1.185692 | 9.333894 | 3.953069 | 0.000112 | 0.002503 | 0.349914 |
| AC073611.2  | 1.000494 | 7.64709  | 3.948655 | 0.000114 | 0.002531 | 0.581749 |
| CEBPB-AS1   | -0.82811 | 6.10207  | -3.94909 | 0.000113 | 0.002531 | 0.574901 |
| AL359513.1  | 3.384857 | 7.63273  | 3.944025 | 0.000116 | 0.002569 | 0.966846 |
| AC008676.1  | -1.1813  | 4.578003 | -3.93805 | 0.000118 | 0.002613 | 0.819729 |
| AL162171.3  | -1.23564 | 5.269145 | -3.93874 | 0.000118 | 0.002613 | 0.625557 |
| AC012531.1  | 7.4276   | 5.638803 | 3.936687 | 0.000119 | 0.002619 | 0.652123 |
| AC093520.1  | 7.045308 | 2.740782 | 3.93437  | 0.00012  | 0.002634 | 0.539334 |
| AC015914.1  | -1.32181 | 6.540625 | -3.93254 | 0.000121 | 0.002645 | 0.376242 |
| AC096888.1  | 7.137599 | -0.95204 | 3.931507 | 0.000121 | 0.002648 | 0.507351 |
| LINC02060   | -3.96022 | -0.20958 | -3.92463 | 0.000124 | 0.002703 | 0.931552 |
| AC023830.3  | -1.30856 | 4.651028 | -3.92529 | 0.000124 | 0.002703 | 0.722504 |
| AC103591.3  | 1.521076 | 8.6274   | 3.922766 | 0.000125 | 0.002714 | 0.380442 |

|             |          |          |          |          |          |          |
|-------------|----------|----------|----------|----------|----------|----------|
| AC017002.3  | 5.792775 | 5.116126 | 3.920252 | 0.000127 | 0.002732 | 0.652705 |
| FAM155A-IT1 | -3.56533 | 0.773874 | -3.9186  | 0.000127 | 0.002735 | 0.939231 |
| AC034213.1  | 8.83054  | 2.743336 | 3.918528 | 0.000127 | 0.002735 | 0.493833 |
| AC020658.4  | 6.876784 | 4.680838 | 3.916522 | 0.000128 | 0.002748 | 0.562616 |
| AL079305.1  | 6.545327 | 0.487226 | 3.913938 | 0.00013  | 0.002759 | 0.463091 |
| AP000808.1  | -1.70331 | 5.739971 | -3.91447 | 0.000129 | 0.002759 | 0.413018 |
| AL590302.2  | -4.31356 | -0.51102 | -3.91094 | 0.000131 | 0.002783 | 0.895604 |
| AC130650.1  | -1.26153 | 6.144332 | -3.90363 | 0.000135 | 0.002853 | 0.324559 |
| AP002449.1  | 1.34207  | 7.804372 | 3.901996 | 0.000136 | 0.002863 | 0.44108  |
| AL049555.1  | 2.084884 | 11.53874 | 3.898438 | 0.000138 | 0.002894 | -0.04404 |
| AC068880.4  | -2.3097  | 3.612434 | -3.89602 | 0.000139 | 0.002904 | 0.656244 |
| AC022144.1  | 1.79435  | 7.621504 | 3.896403 | 0.000139 | 0.002904 | 0.542544 |
| AC009090.3  | -1.19543 | 7.103024 | -3.89451 | 0.00014  | 0.002913 | 0.162976 |
| AC108449.2  | -0.88428 | 9.444324 | -3.89094 | 0.000141 | 0.002945 | -0.14582 |
| LINC01943   | 3.517715 | 6.617603 | 3.88147  | 0.000147 | 0.003044 | 0.804267 |
| TNRC6C-AS1  | 1.317687 | 8.182394 | 3.880375 | 0.000147 | 0.003048 | 0.281764 |
| AC104211.2  | -4.64523 | -1.55133 | -3.8756  | 0.00015  | 0.003095 | 0.717985 |
| AC007950.3  | -1.63024 | 3.198095 | -3.87324 | 0.000151 | 0.003114 | 0.752187 |
| AC109454.4  | -1.16425 | 5.834428 | -3.86932 | 0.000154 | 0.003152 | 0.292363 |
| AC006252.1  | 2.315032 | 5.758825 | 3.86831  | 0.000154 | 0.003155 | 0.765091 |
| AC090952.1  | -4.44652 | -0.42895 | -3.86441 | 0.000156 | 0.003194 | 0.749478 |
| AL023803.2  | 3.183511 | 7.330257 | 3.863095 | 0.000157 | 0.003201 | 0.729444 |
| U62317.2    | 1.3597   | 10.14687 | 3.854524 | 0.000162 | 0.003297 | -0.10566 |
| AC007342.6  | -0.64603 | 5.784455 | -3.85266 | 0.000164 | 0.003311 | 0.321105 |
| AC104117.3  | -2.09624 | 4.254823 | -3.84873 | 0.000166 | 0.003352 | 0.393446 |
| LINC02574   | 7.714239 | 1.600343 | 3.84585  | 0.000168 | 0.00337  | 0.277584 |
| DIAPH3-AS2  | 7.371914 | 1.515551 | 3.846016 | 0.000168 | 0.00337  | 0.277279 |
| AP001486.2  | -0.82993 | 7.229658 | -3.84365 | 0.000169 | 0.003389 | 0.001386 |
| AC024619.3  | -2.70589 | 3.063548 | -3.83818 | 0.000173 | 0.00345  | 0.495399 |
| AC007611.1  | 3.5149   | 5.385126 | 3.836099 | 0.000174 | 0.003468 | 0.565374 |
| AL117382.2  | -4.18283 | 1.639612 | -3.83334 | 0.000176 | 0.003495 | 0.597248 |
| AC239803.2  | -3.21004 | 1.559911 | -3.82577 | 0.000181 | 0.003576 | 0.606586 |
| AC020917.4  | -0.66543 | 7.82366  | -3.82604 | 0.000181 | 0.003576 | -0.12845 |
| AC139530.2  | 0.842532 | 8.641459 | 3.815813 | 0.000188 | 0.003702 | -0.09265 |
| VPS9D1-AS1  | 1.678187 | 10.76669 | 3.814416 | 0.000189 | 0.003712 | -0.29021 |
| AL031726.1  | -4.59695 | -0.55126 | -3.80971 | 0.000192 | 0.003768 | 0.565622 |
| LOH12CR2    | -0.85228 | 6.461707 | -3.80896 | 0.000193 | 0.003769 | 0.011907 |
| AF131215.4  | -1.77863 | 4.046025 | -3.80681 | 0.000194 | 0.003789 | 0.336212 |
| LINC02029   | 5.729561 | 1.299685 | 3.80517  | 0.000195 | 0.003803 | 0.160816 |
| Z94721.1    | 1.439146 | 7.89611  | 3.80411  | 0.000196 | 0.003808 | 0.108335 |
| AC008543.4  | -2.10595 | 3.880515 | -3.79712 | 0.000201 | 0.003885 | 0.287939 |
| HPN-AS1     | -2.21665 | 4.196168 | -3.79582 | 0.000202 | 0.003885 | 0.216159 |
| AL132657.1  | -1.37834 | 5.360299 | -3.79464 | 0.000203 | 0.003885 | 0.092367 |
| AC016738.1  | -1.16298 | 5.727956 | -3.79463 | 0.000203 | 0.003885 | 0.039093 |
| AP002498.1  | -1.94555 | 5.910017 | -3.79658 | 0.000202 | 0.003885 | -0.08371 |
| AL035461.2  | 1.215472 | 8.74974  | 3.797836 | 0.000201 | 0.003885 | -0.11316 |
| AC010136.1  | -2.93301 | 2.978576 | -3.79231 | 0.000205 | 0.003898 | 0.379456 |
| AL391244.2  | 0.90685  | 8.51224  | 3.792626 | 0.000205 | 0.003898 | -0.14019 |
| ZRANB2-AS1  | -2.03379 | 3.61567  | -3.78203 | 0.000213 | 0.00404  | 0.320209 |
| AL139383.1  | -1.71287 | 4.876312 | -3.78109 | 0.000214 | 0.004044 | 0.104561 |
| Z83844.2    | 2.265416 | 5.36338  | 3.775402 | 0.000218 | 0.00412  | 0.456534 |
| AC112721.2  | 8.973448 | 3.120023 | 3.772873 | 0.00022  | 0.004148 | 0.085579 |
| AC016924.1  | -3.20212 | 2.032844 | -3.7718  | 0.000221 | 0.004154 | 0.404961 |
| AL138759.1  | 6.054767 | 4.424441 | 3.770472 | 0.000222 | 0.004164 | 0.174513 |
| AC233266.2  | -2.77398 | 3.190554 | -3.76938 | 0.000223 | 0.004171 | 0.214574 |
| AL670729.1  | 2.261242 | 7.515554 | 3.767002 | 0.000225 | 0.004187 | 0.219657 |
| AC008764.2  | -0.89207 | 9.020162 | -3.767   | 0.000225 | 0.004187 | -0.52775 |
| AC007114.2  | -1.07242 | 5.355808 | -3.76552 | 0.000226 | 0.0042   | 0.058779 |

|             |          |          |          |          |          |          |
|-------------|----------|----------|----------|----------|----------|----------|
| AC004947.1  | -3.3644  | 0.24437  | -3.76142 | 0.00023  | 0.004253 | 0.416651 |
| AL357033.3  | -1.44253 | 7.506955 | -3.75883 | 0.000232 | 0.004284 | -0.39872 |
| AC116337.3  | -4.19772 | -0.00133 | -3.75184 | 0.000238 | 0.004385 | 0.380584 |
| AL359317.2  | -1.10545 | 4.017533 | -3.74897 | 0.000241 | 0.004421 | 0.276739 |
| AC013275.1  | -4.29371 | 0.051005 | -3.74644 | 0.000243 | 0.004451 | 0.3717   |
| MIR181A1HG  | 4.301548 | 1.627543 | 3.743498 | 0.000246 | 0.004489 | 0.016806 |
| AC010226.1  | -0.71021 | 6.775241 | -3.73352 | 0.000255 | 0.004646 | -0.28927 |
| AP001630.1  | -3.60895 | 1.165361 | -3.73284 | 0.000255 | 0.004646 | 0.321021 |
| DDX11-AS1   | 1.92235  | 6.331077 | 3.731958 | 0.000256 | 0.004649 | 0.263962 |
| AC135050.6  | -0.62418 | 10.76753 | -3.73134 | 0.000257 | 0.004649 | -0.8621  |
| XXYLT1-AS2  | -1.82082 | 5.613868 | -3.72966 | 0.000258 | 0.004667 | -0.23256 |
| AP005131.4  | -1.71306 | 4.953986 | -3.72746 | 0.000261 | 0.004693 | -0.10774 |
| AL135960.1  | -1.97488 | 1.963939 | -3.72637 | 0.000262 | 0.004701 | 0.307657 |
| LINC00322   | 6.620958 | 0.827765 | 3.725471 | 0.000262 | 0.004705 | -0.06195 |
| AC095057.3  | -0.85704 | 7.06341  | -3.72294 | 0.000265 | 0.004738 | -0.397   |
| AC015961.1  | -2.2748  | 2.543964 | -3.72055 | 0.000267 | 0.004768 | 0.237973 |
| PART1       | -1.62521 | 5.381244 | -3.71794 | 0.00027  | 0.004803 | -0.20063 |
| AC122129.1  | -0.83875 | 7.769086 | -3.71695 | 0.000271 | 0.004809 | -0.52096 |
| C9orf106    | -1.9579  | 3.297378 | -3.71076 | 0.000277 | 0.004898 | 0.200244 |
| AC007938.1  | 4.772123 | 1.481235 | 3.710596 | 0.000277 | 0.004898 | -0.09088 |
| AC025627.1  | 6.774218 | 1.775297 | 3.708746 | 0.000279 | 0.004898 | -0.10208 |
| KIF9-AS1    | -0.65263 | 5.976447 | -3.7087  | 0.000279 | 0.004898 | -0.20894 |
| AL356273.3  | -0.95903 | 6.701606 | -3.70896 | 0.000279 | 0.004898 | -0.39402 |
| AL590683.1  | 5.521883 | 0.53031  | 3.704652 | 0.000283 | 0.00496  | -0.12056 |
| AC004241.5  | -0.84653 | 5.110401 | -3.69875 | 0.000289 | 0.005056 | -0.0816  |
| AC005884.1  | -2.45726 | 3.146495 | -3.68922 | 0.0003   | 0.005223 | 0.028148 |
| AC107072.2  | -2.19175 | 4.204859 | -3.68604 | 0.000303 | 0.00526  | -0.15211 |
| AC004241.3  | 1.181827 | 7.78053  | 3.686463 | 0.000303 | 0.00526  | -0.33557 |
| AL117332.1  | 1.163847 | 7.17588  | 3.685322 | 0.000304 | 0.005261 | -0.23231 |
| AC022211.2  | 1.42339  | 7.464544 | 3.683774 | 0.000306 | 0.005279 | -0.23682 |
| AC078925.3  | -4.16019 | -2.51408 | -3.67819 | 0.000312 | 0.005375 | 0.009367 |
| AC069029.1  | -2.54662 | 3.735615 | -3.67551 | 0.000315 | 0.005415 | -0.15026 |
| AC010997.6  | -1.96979 | 2.987146 | -3.67468 | 0.000316 | 0.005419 | 0.07262  |
| AL161891.1  | 1.371093 | 6.966042 | 3.671289 | 0.00032  | 0.005474 | -0.1598  |
| LDLRAD4-AS1 | -2.21384 | 2.675233 | -3.66874 | 0.000323 | 0.005512 | 0.06025  |
| AC022211.1  | 1.379091 | 8.724795 | 3.667264 | 0.000325 | 0.005529 | -0.53944 |
| AP000873.3  | 4.272797 | 4.044038 | 3.659651 | 0.000334 | 0.005671 | -0.09164 |
| AL353194.1  | 0.830308 | 8.745347 | 3.656406 | 0.000338 | 0.005725 | -0.65465 |
| AP000897.1  | -4.0427  | -1.42275 | -3.65393 | 0.000341 | 0.005764 | 0.01478  |
| AC087071.1  | -2.44163 | 3.030314 | -3.64854 | 0.000347 | 0.005864 | -0.09619 |
| AC048344.4  | 2.982348 | 6.852266 | 3.647144 | 0.000349 | 0.005879 | 0.02486  |
| AC006378.2  | -1.11766 | 4.656024 | -3.64658 | 0.00035  | 0.005879 | -0.22655 |
| LINC01954   | -4.15366 | 0.557534 | -3.64471 | 0.000352 | 0.005906 | 0.048756 |
| AC020978.4  | -1.18698 | 7.819642 | -3.64198 | 0.000356 | 0.005951 | -0.81916 |
| SCAT2       | 1.070877 | 7.922613 | 3.639123 | 0.000359 | 0.006    | -0.53952 |
| AC092614.1  | 2.166305 | 6.341172 | 3.636442 | 0.000363 | 0.006044 | -0.01421 |
| RBM5-AS1    | -0.68503 | 6.317644 | -3.63447 | 0.000365 | 0.006063 | -0.54382 |
| AC010442.1  | -1.49624 | 11.69816 | -3.63438 | 0.000366 | 0.006063 | -1.35441 |
| AL133338.1  | 1.081896 | 7.715042 | 3.63201  | 0.000369 | 0.006101 | -0.51889 |
| AP002884.4  | -2.74643 | 1.405587 | -3.62467 | 0.000379 | 0.006238 | -0.01901 |
| AC012676.1  | 1.065039 | 6.4863   | 3.624641 | 0.000379 | 0.006238 | -0.2702  |
| AC008073.2  | -2.5474  | 1.790477 | -3.62043 | 0.000384 | 0.006319 | -0.03827 |
| AL157932.1  | 1.191207 | 7.707992 | 3.619042 | 0.000386 | 0.006337 | -0.55629 |
| AP001831.1  | -4.06664 | -0.12073 | -3.6179  | 0.000388 | 0.006349 | -0.03454 |
| AC090152.1  | -1.35151 | 6.810324 | -3.61717 | 0.000389 | 0.006352 | -0.76456 |
| AC113346.1  | 9.490673 | 2.399415 | 3.613009 | 0.000395 | 0.006434 | -0.35593 |
| CEP83-DT    | 2.164211 | 5.031223 | 3.607494 | 0.000403 | 0.006548 | -0.08065 |
| AC016683.1  | -1.65777 | 4.252225 | -3.6065  | 0.000404 | 0.006557 | -0.33214 |



|              |          |          |          |          |          |          |
|--------------|----------|----------|----------|----------|----------|----------|
| KMT2E-AS1    | 0.915344 | 9.796276 | 3.604141 | 0.000408 | 0.006599 | -0.97346 |
| AC020951.1   | -1.27328 | 4.722792 | -3.59826 | 0.000416 | 0.006711 | -0.45007 |
| AP003721.4   | -1.39457 | 4.950277 | -3.59824 | 0.000416 | 0.006711 | -0.48036 |
| AC090844.2   | -1.84518 | 4.469654 | -3.59701 | 0.000418 | 0.006726 | -0.4642  |
| AC007673.1   | -2.51042 | 2.590813 | -3.59118 | 0.000427 | 0.006853 | -0.21989 |
| AP003352.1   | 0.816115 | 9.965898 | 3.589731 | 0.000429 | 0.006874 | -1.06501 |
| RBM12B-AS1   | 0.939328 | 8.342044 | 3.583746 | 0.000438 | 0.007007 | -0.82148 |
| AL355802.2   | 1.421179 | 8.033954 | 3.58268  | 0.00044  | 0.007019 | -0.70344 |
| AC106795.3   | -3.1481  | 1.875671 | -3.57878 | 0.000446 | 0.007102 | -0.23092 |
| AC002401.2   | -2.37426 | 3.72183  | -3.56814 | 0.000463 | 0.007345 | -0.48364 |
| AC010210.1   | -1.08956 | 5.036928 | -3.56844 | 0.000463 | 0.007345 | -0.52744 |
| AP001453.2   | 2.247723 | 9.49337  | 3.567376 | 0.000465 | 0.00735  | -0.89724 |
| AC048380.1   | -2.75542 | 2.26802  | -3.55888 | 0.000479 | 0.007559 | -0.29469 |
| HID1-AS1     | -1.67103 | 4.580129 | -3.55809 | 0.00048  | 0.007564 | -0.57466 |
| LINC01981    | 6.049835 | 0.911963 | 3.555634 | 0.000484 | 0.007615 | -0.51822 |
| FER1L6-AS1   | -4.05193 | -0.37338 | -3.55275 | 0.000489 | 0.007635 | -0.24075 |
| AC134026.1   | -4.52367 | -1.34965 | -3.55319 | 0.000489 | 0.007635 | -0.25473 |
| AC009806.1   | -1.87491 | 4.256948 | -3.55253 | 0.00049  | 0.007635 | -0.577   |
| AF001548.1   | -1.991   | 6.259778 | -3.55365 | 0.000488 | 0.007635 | -0.98208 |
| AC012183.1   | -2.5753  | 2.873529 | -3.54933 | 0.000495 | 0.007686 | -0.39797 |
| AC068491.2   | 5.87599  | 4.020792 | 3.549915 | 0.000494 | 0.007686 | -0.45599 |
| MAG11-IT1    | -1.12727 | 4.645618 | -3.54891 | 0.000496 | 0.007686 | -0.52841 |
| AC007224.2   | -1.75193 | 4.280101 | -3.54709 | 0.000499 | 0.007709 | -0.59624 |
| CD44-AS1     | 2.183826 | 9.20127  | 3.546879 | 0.0005   | 0.007709 | -0.91078 |
| ZEB1-AS1     | 1.281274 | 8.387347 | 3.546177 | 0.000501 | 0.007713 | -0.90255 |
| LINC00115    | 0.912942 | 7.11348  | 3.542361 | 0.000508 | 0.007802 | -0.73515 |
| AC007688.2   | -2.48411 | 3.089629 | -3.53466 | 0.000522 | 0.007984 | -0.48234 |
| AC022973.4   | 1.347629 | 6.814842 | 3.534752 | 0.000522 | 0.007984 | -0.60295 |
| AC097382.2   | -1.14449 | 2.657788 | -3.53328 | 0.000524 | 0.007991 | -0.29789 |
| AC008663.2   | -1.25084 | 3.589135 | -3.5333  | 0.000524 | 0.007991 | -0.37635 |
| HOXC-AS2     | 6.334638 | 6.365512 | 3.531446 | 0.000528 | 0.008006 | -0.42967 |
| AC004551.1   | 5.04404  | 4.640829 | 3.532053 | 0.000527 | 0.008006 | -0.45121 |
| AL596325.2   | -0.92139 | 8.463082 | -3.53103 | 0.000529 | 0.008006 | -1.25051 |
| AC084117.1   | 2.089519 | 7.938105 | 3.529917 | 0.000531 | 0.008021 | -0.70132 |
| AC026362.2   | -0.79799 | 4.538359 | -3.52553 | 0.000539 | 0.00813  | -0.53356 |
| AC110774.1   | -2.46055 | 2.791797 | -3.52316 | 0.000543 | 0.008181 | -0.4245  |
| AL109767.1   | 6.482533 | 2.7092   | 3.522258 | 0.000545 | 0.008191 | -0.59324 |
| AC124303.1   | -3.66943 | -0.57465 | -3.52063 | 0.000548 | 0.008197 | -0.35172 |
| HEXA-AS1     | -0.9273  | 4.3644   | -3.51977 | 0.00055  | 0.008197 | -0.51128 |
| AC010331.1   | 1.13408  | 6.95164  | 3.520037 | 0.000549 | 0.008197 | -0.71051 |
| AC005746.1   | -1.22991 | 5.486665 | -3.52066 | 0.000548 | 0.008197 | -0.8486  |
| AL049539.1   | 3.29825  | 6.513317 | 3.515764 | 0.000558 | 0.008297 | -0.34746 |
| AC006026.3   | -2.79642 | 5.384539 | -3.51304 | 0.000563 | 0.008361 | -1.05787 |
| AC027228.2   | 2.709665 | 6.873521 | 3.510725 | 0.000568 | 0.008412 | -0.42658 |
| Z99774.1     | 4.984338 | -1.29903 | 3.506742 | 0.000576 | 0.008514 | -0.6533  |
| AL359715.3   | -0.79684 | 7.600551 | -3.50542 | 0.000578 | 0.008537 | -1.19204 |
| AC017076.1   | 6.783203 | 3.19779  | 3.50355  | 0.000582 | 0.008576 | -0.63722 |
| PRICKLE2-AS3 | -1.94149 | 2.316294 | -3.50284 | 0.000584 | 0.008581 | -0.40567 |
| AC019069.1   | 1.800674 | 8.012744 | 3.500681 | 0.000588 | 0.008629 | -0.90034 |
| AL109924.4   | -4.02149 | 0.064096 | -3.49812 | 0.000593 | 0.00869  | -0.4001  |
| AC022893.2   | -3.26286 | 0.879336 | -3.49717 | 0.000595 | 0.008702 | -0.40425 |
| AC007598.3   | -0.71442 | 5.128003 | -3.49578 | 0.000598 | 0.008727 | -0.73435 |
| AC010201.2   | -0.78769 | 5.907358 | -3.49491 | 0.0006   | 0.008737 | -0.94165 |
| AC079354.2   | 7.856312 | 3.102435 | 3.494077 | 0.000602 | 0.008746 | -0.66675 |
| AC007849.1   | -2.10882 | 7.585049 | -3.4856  | 0.00062  | 0.008991 | -1.41288 |
| AC011468.3   | -2.78996 | 2.181472 | -3.48403 | 0.000623 | 0.009023 | -0.54578 |
| LINC02585    | 1.929369 | 7.843505 | 3.482852 | 0.000626 | 0.009043 | -0.86603 |
| AL590326.1   | 1.069717 | 7.611976 | 3.480642 | 0.000631 | 0.009096 | -0.99479 |

|            |          |          |          |          |          |          |
|------------|----------|----------|----------|----------|----------|----------|
| HMMR-AS1   | 5.314595 | 1.737312 | 3.479632 | 0.000633 | 0.00911  | -0.70975 |
| AC016251.2 | -3.88421 | -1.29702 | -3.47793 | 0.000637 | 0.009147 | -0.51316 |
| JARID2-AS1 | 2.836323 | 5.754049 | 3.471302 | 0.000652 | 0.009343 | -0.48056 |
| BX537318.2 | 2.171395 | 2.893594 | 3.469938 | 0.000655 | 0.009362 | -0.59158 |
| AC006960.3 | -2.38326 | 3.018717 | -3.46963 | 0.000655 | 0.009362 | -0.68582 |
| AP001189.1 | -1.4077  | 4.970878 | -3.46897 | 0.000657 | 0.009365 | -0.93131 |
| AC231657.1 | -1.13457 | 6.126889 | -3.4676  | 0.00066  | 0.009393 | -1.11678 |
| AL391097.1 | -2.63055 | 2.025069 | -3.46644 | 0.000663 | 0.009413 | -0.54388 |
| AC107072.1 | -4.27523 | 0.956098 | -3.46533 | 0.000665 | 0.009431 | -0.52123 |
| AC008114.1 | 8.101037 | 4.88342  | 3.464336 | 0.000668 | 0.009446 | -0.71963 |
| ERVE-1     | -1.65905 | 5.571447 | -3.46294 | 0.000671 | 0.009474 | -1.062   |
| AL133384.2 | -2.70947 | 0.873169 | -3.45571 | 0.000688 | 0.009697 | -0.52693 |
| AP001021.2 | -3.06095 | 1.850475 | -3.45509 | 0.000689 | 0.0097   | -0.61378 |
| AC073167.1 | -2.49368 | 2.407686 | -3.45453 | 0.000691 | 0.009701 | -0.62471 |
| AC015961.2 | -2.35162 | 2.846826 | -3.45397 | 0.000692 | 0.009701 | -0.67528 |
| AC092140.2 | -0.77715 | 6.249552 | -3.45046 | 0.000701 | 0.009802 | -1.15789 |
| AC083799.1 | 0.821103 | 10.92056 | 3.44801  | 0.000707 | 0.009867 | -1.65692 |
| SSBP3-AS1  | -0.87071 | 7.03808  | -3.44648 | 0.00071  | 0.009901 | -1.31722 |
| LNx1-AS2   | -2.26003 | 3.142474 | -3.44571 | 0.000712 | 0.009909 | -0.73533 |
| AC112196.1 | -3.83482 | 0.171184 | -3.44365 | 0.000717 | 0.009961 | -0.56249 |
| Z97989.1   | -0.62887 | 6.426724 | -3.43894 | 0.000729 | 0.010107 | -1.19228 |
| AC064807.2 | -2.12133 | 4.446601 | -3.43546 | 0.000738 | 0.01021  | -0.94807 |
| AL590226.1 | -1.95327 | 3.9496   | -3.43264 | 0.000745 | 0.010272 | -0.89003 |
| AC116407.2 | 1.210793 | 7.715121 | 3.432777 | 0.000745 | 0.010272 | -1.14684 |
| AC010551.2 | -4.43855 | -1.25206 | -3.42091 | 0.000776 | 0.010667 | -0.64468 |
| AC068014.1 | 6.319746 | 0.651121 | 3.420637 | 0.000777 | 0.010667 | -0.86922 |
| LGALS8-AS1 | 2.025219 | 4.369838 | 3.418629 | 0.000782 | 0.010722 | -0.65288 |
| AL450992.1 | 2.713437 | 4.179703 | 3.417286 | 0.000786 | 0.010752 | -0.68971 |
| PYCARD-AS1 | 3.558049 | 4.108084 | 3.41566  | 0.00079  | 0.010793 | -0.73974 |
| AC084036.1 | -0.90178 | 8.956345 | -3.41496 | 0.000792 | 0.010799 | -1.70022 |
| Z97653.1   | -1.68874 | 5.116271 | -3.41182 | 0.000801 | 0.010897 | -1.22352 |
| AL590666.3 | 4.05727  | 0.503164 | 3.410516 | 0.000804 | 0.010906 | -0.89326 |
| AC079322.1 | -0.65446 | 6.037941 | -3.41074 | 0.000804 | 0.010906 | -1.21974 |
| AC091043.1 | -4.41264 | 1.445481 | -3.40933 | 0.000807 | 0.010931 | -0.72472 |
| AL590093.1 | -1.59122 | 5.53718  | -3.40622 | 0.000816 | 0.011029 | -1.28146 |
| LINC00853  | 3.918052 | 6.85171  | 3.399508 | 0.000835 | 0.011265 | -0.69216 |
| AC022898.2 | -4.00701 | -0.88051 | -3.39897 | 0.000837 | 0.011266 | -0.70862 |
| GASAL1     | 2.341002 | 7.385601 | 3.395244 | 0.000847 | 0.01139  | -0.9211  |
| AC068491.4 | 1.805233 | 5.938585 | 3.394292 | 0.00085  | 0.011407 | -0.77039 |
| DCXR-DT    | -1.89473 | 3.844994 | -3.39269 | 0.000855 | 0.011449 | -0.95512 |
| AC080112.1 | 1.015116 | 9.886078 | 3.390987 | 0.00086  | 0.011496 | -1.67704 |
| AC009303.4 | 1.14156  | 7.295902 | 3.387444 | 0.00087  | 0.011615 | -1.21698 |
| AC131182.1 | -2.14008 | 3.09874  | -3.38541 | 0.000876 | 0.011676 | -0.89492 |
| AL445223.1 | -1.86987 | 3.966119 | -3.38454 | 0.000879 | 0.01169  | -1.02823 |
| LINC02038  | -2.75235 | 4.972966 | -3.38338 | 0.000883 | 0.011715 | -1.35605 |
| AL118516.1 | 1.006537 | 9.605979 | 3.380544 | 0.000891 | 0.011808 | -1.66735 |
| SRGAP3-AS4 | -4.32027 | -0.52483 | -3.37875 | 0.000897 | 0.011858 | -0.75414 |
| AC144831.1 | -1.2436  | 6.682743 | -3.37829 | 0.000898 | 0.011858 | -1.52954 |
| BX470102.1 | 1.755019 | 9.220646 | 3.376148 | 0.000905 | 0.011924 | -1.51392 |
| NEXN-AS1   | -0.75105 | 5.328868 | -3.37359 | 0.000913 | 0.011975 | -1.17085 |
| UBE2Q1-AS1 | 1.107311 | 7.117147 | 3.373353 | 0.000913 | 0.011975 | -1.23905 |
| AC106820.3 | 0.960882 | 7.600003 | 3.374027 | 0.000911 | 0.011975 | -1.35487 |
| AC068473.4 | 7.186791 | 1.260149 | 3.372365 | 0.000916 | 0.011986 | -0.98903 |
| AC008105.1 | 1.522098 | 6.798296 | 3.37207  | 0.000917 | 0.011986 | -1.07798 |
| AL356417.2 | 6.511592 | 2.313558 | 3.366487 | 0.000935 | 0.012195 | -0.99816 |
| LINC01675  | 5.998516 | 1.124678 | 3.365913 | 0.000937 | 0.012197 | -1.00617 |
| AC079209.1 | 5.50675  | 2.29611  | 3.364521 | 0.000941 | 0.012234 | -0.99524 |
| LINC01711  | 5.865005 | 4.065856 | 3.362497 | 0.000948 | 0.012272 | -0.95285 |

|            |          |          |          |          |          |          |
|------------|----------|----------|----------|----------|----------|----------|
| AC129507.3 | -2.54279 | 3.830351 | -3.36219 | 0.000949 | 0.012272 | -1.17343 |
| AL391834.1 | -0.73219 | 8.591384 | -3.3621  | 0.000949 | 0.012272 | -1.79691 |
| BLACE      | 4.51136  | 0.205183 | 3.360439 | 0.000954 | 0.012299 | -1.02309 |
| AL132639.3 | 1.032429 | 6.465742 | 3.360454 | 0.000954 | 0.012299 | -1.11281 |
| AL021408.1 | -3.25972 | 1.556277 | -3.35895 | 0.000959 | 0.012321 | -0.85831 |
| AC135279.3 | 1.183683 | 5.483568 | 3.358892 | 0.000959 | 0.012321 | -0.89002 |
| AC008434.1 | 2.542071 | 5.094901 | 3.349816 | 0.000989 | 0.012663 | -0.84063 |
| AC091588.1 | -3.19444 | 3.632052 | -3.34998 | 0.000989 | 0.012663 | -1.17801 |
| AL139081.1 | -3.23676 | 2.195815 | -3.34597 | 0.001002 | 0.012786 | -0.95352 |
| Z73965.1   | -0.71444 | 5.330772 | -3.34599 | 0.001002 | 0.012786 | -1.2805  |
| AL109923.1 | 1.793672 | 5.586917 | 3.341989 | 0.001016 | 0.012938 | -0.88775 |
| ZNF674-AS1 | 0.720611 | 8.504908 | 3.336302 | 0.001036 | 0.013167 | -1.68588 |
| AC067931.1 | 1.83037  | 7.185747 | 3.333269 | 0.001046 | 0.01328  | -1.20841 |
| AC016065.1 | 0.987551 | 8.591327 | 3.329521 | 0.00106  | 0.013426 | -1.67635 |
| LINC01311  | 1.128964 | 6.665867 | 3.328062 | 0.001065 | 0.01347  | -1.26927 |
| AC007938.2 | 1.713183 | 4.191342 | 3.323849 | 0.00108  | 0.013636 | -0.91289 |
| AL583856.2 | -1.21466 | 5.63473  | -3.32343 | 0.001082 | 0.013636 | -1.49139 |
| AC079922.2 | 0.951831 | 6.785191 | 3.318596 | 0.0011   | 0.013837 | -1.34361 |
| AC139768.2 | -0.74193 | 7.360036 | -3.31595 | 0.001109 | 0.013937 | -1.75921 |
| AC011473.3 | -3.1723  | 3.050357 | -3.31319 | 0.00112  | 0.014044 | -1.17931 |
| AC002546.1 | -3.58822 | 0.864245 | -3.31226 | 0.001123 | 0.014054 | -0.96266 |
| AL136982.3 | -0.77914 | 6.28412  | -3.31198 | 0.001124 | 0.014054 | -1.58967 |
| AL035588.1 | -2.35092 | 2.898173 | -3.31046 | 0.00113  | 0.014103 | -1.14465 |
| AC053503.2 | 4.104813 | 3.630145 | 3.305009 | 0.001151 | 0.01434  | -1.0667  |
| AC127521.1 | -1.38216 | 5.959773 | -3.30412 | 0.001154 | 0.014359 | -1.63924 |
| AL139230.1 | -4.39529 | -1.32437 | -3.30164 | 0.001164 | 0.014455 | -0.98576 |
| AC036176.1 | -0.77189 | 7.730318 | -3.30021 | 0.00117  | 0.014501 | -1.87232 |
| AC096733.2 | -0.901   | 7.401205 | -3.29739 | 0.001181 | 0.014614 | -1.84615 |
| LINC02043  | 4.071484 | 4.535545 | 3.295002 | 0.00119  | 0.014683 | -1.06178 |
| AL031847.1 | -1.14347 | 6.494928 | -3.29503 | 0.00119  | 0.014683 | -1.73484 |
| AC139795.2 | -0.88531 | 8.70441  | -3.29437 | 0.001193 | 0.01469  | -2.04026 |
| MIR4713HG  | 3.263055 | 7.462912 | 3.286571 | 0.001224 | 0.015054 | -1.12962 |
| AC068189.1 | 2.975839 | 4.945216 | 3.283092 | 0.001239 | 0.015205 | -1.04022 |
| AC106712.1 | 5.336463 | 0.052293 | 3.277823 | 0.001261 | 0.015424 | -1.22862 |
| AL118505.1 | 1.59832  | 8.044431 | 3.278036 | 0.00126  | 0.015424 | -1.64251 |
| AC053513.1 | -0.89156 | 6.832465 | -3.27564 | 0.00127  | 0.015512 | -1.81845 |
| AC093458.1 | -3.78063 | 0.68401  | -3.27357 | 0.001279 | 0.015591 | -1.07564 |
| AC138956.1 | -0.71388 | 7.686627 | -3.27313 | 0.00128  | 0.015591 | -1.93822 |
| U62317.1   | 3.178565 | 8.815839 | 3.272522 | 0.001283 | 0.015598 | -1.48189 |
| LINC01281  | 5.398151 | 1.301694 | 3.26758  | 0.001304 | 0.015808 | -1.24929 |
| AC002398.1 | 0.76271  | 8.794508 | 3.267534 | 0.001305 | 0.015808 | -1.93604 |
| LINC01508  | 7.071435 | 1.11111  | 3.265809 | 0.001312 | 0.015873 | -1.25469 |
| AL353795.3 | -0.85938 | 4.371881 | -3.26489 | 0.001316 | 0.015875 | -1.30034 |
| AC046158.4 | -1.48526 | 4.275149 | -3.26481 | 0.001316 | 0.015875 | -1.41294 |
| AC009097.2 | 6.301639 | 5.317839 | 3.262436 | 0.001327 | 0.015975 | -1.17717 |
| AL035458.2 | 1.925444 | 7.110885 | 3.260308 | 0.001336 | 0.016063 | -1.38568 |
| Z99289.2   | 4.560465 | 2.060456 | 3.258905 | 0.001342 | 0.016112 | -1.24626 |
| AC007342.7 | -0.57032 | 7.125882 | -3.25812 | 0.001346 | 0.016128 | -1.8848  |
| AC005264.1 | 2.556698 | 5.203739 | 3.256957 | 0.001351 | 0.016158 | -1.09794 |
| AC138207.4 | 0.813523 | 8.004461 | 3.256135 | 0.001355 | 0.016158 | -1.83269 |
| AC074117.1 | 0.725947 | 9.406017 | 3.256353 | 0.001354 | 0.016158 | -2.05496 |
| OGFR-AS1   | 1.649941 | 6.552397 | 3.255461 | 0.001358 | 0.016168 | -1.30681 |
| AP001469.3 | 0.865796 | 7.752641 | 3.253598 | 0.001366 | 0.016243 | -1.78681 |
| MIR222HG   | 1.179478 | 8.626697 | 3.252528 | 0.001371 | 0.016275 | -1.89608 |
| AC010329.1 | -2.56792 | 1.669857 | -3.25136 | 0.001377 | 0.016312 | -1.13838 |
| AC007787.1 | -2.25435 | 1.941089 | -3.24758 | 0.001394 | 0.016492 | -1.16457 |
| AC009090.1 | -0.69166 | 8.267679 | -3.24666 | 0.001398 | 0.016516 | -2.09899 |
| LINC01385  | 6.016844 | -1.08597 | 3.245634 | 0.001403 | 0.016546 | -1.30968 |

|             |          |          |          |          |          |          |
|-------------|----------|----------|----------|----------|----------|----------|
| LINC00891   | -2.93949 | -0.05104 | -3.24465 | 0.001407 | 0.016566 | -1.13496 |
| AC010201.1  | -1.19428 | 5.322126 | -3.24433 | 0.001409 | 0.016566 | -1.66499 |
| AC011199.1  | 3.958998 | 0.467612 | 3.243275 | 0.001414 | 0.016598 | -1.3097  |
| LINC02416   | 6.050123 | 5.844849 | 3.239868 | 0.00143  | 0.016712 | -1.21703 |
| AL031667.3  | 1.312116 | 7.139771 | 3.240598 | 0.001426 | 0.016712 | -1.62098 |
| AC036108.3  | -0.92917 | 6.199635 | -3.2398  | 0.00143  | 0.016712 | -1.83397 |
| AC134407.2  | -0.56463 | 6.210839 | -3.23489 | 0.001454 | 0.016959 | -1.78063 |
| AP005136.2  | 0.971138 | 6.926436 | 3.234243 | 0.001457 | 0.016969 | -1.61013 |
| TFAP2A-AS1  | 3.135467 | 6.624366 | 3.233113 | 0.001462 | 0.017006 | -1.18782 |
| ZBTB20-AS3  | -2.90283 | 2.108153 | -3.22973 | 0.001479 | 0.01717  | -1.26474 |
| ZBTB20-AS5  | -2.13912 | 2.279482 | -3.22841 | 0.001485 | 0.017218 | -1.24225 |
| AC097358.2  | 3.684861 | 3.90406  | 3.227178 | 0.001491 | 0.017262 | -1.24684 |
| LINC02108   | 5.337719 | -0.60129 | 3.22669  | 0.001494 | 0.017263 | -1.35477 |
| AC074032.1  | -0.49381 | 7.897658 | -3.22401 | 0.001507 | 0.01739  | -2.08802 |
| AL162431.2  | 1.198077 | 6.655136 | 3.222789 | 0.001513 | 0.017425 | -1.56113 |
| AC027117.2  | -1.56566 | 6.421275 | -3.22247 | 0.001514 | 0.017425 | -2.00113 |
| AL356489.2  | -2.04908 | 2.841758 | -3.22024 | 0.001526 | 0.017499 | -1.37624 |
| AC026356.2  | 0.956482 | 7.199441 | 3.220482 | 0.001524 | 0.017499 | -1.73612 |
| AP003469.2  | 2.776118 | 7.454633 | 3.21953  | 0.001529 | 0.017513 | -1.32297 |
| AC007405.2  | 6.04632  | 1.139218 | 3.211098 | 0.001572 | 0.017978 | -1.38806 |
| AC096637.2  | 3.954983 | 2.666936 | 3.206695 | 0.001595 | 0.018213 | -1.34142 |
| LINC02601   | 5.065577 | 2.791584 | 3.203729 | 0.001611 | 0.018307 | -1.37107 |
| AC008764.8  | 0.633722 | 6.153681 | 3.202959 | 0.001615 | 0.018307 | -1.61318 |
| AL928654.4  | 0.939948 | 8.276275 | 3.202811 | 0.001616 | 0.018307 | -2.02023 |
| CDC37L1-DT  | -0.87378 | 7.263774 | -3.20378 | 0.00161  | 0.018307 | -2.10541 |
| NPTN-IT1    | -0.54543 | 8.398846 | -3.20419 | 0.001608 | 0.018307 | -2.23473 |
| AC004812.2  | 0.852924 | 8.306995 | 3.200689 | 0.001627 | 0.018407 | -2.04566 |
| LINC02261   | 4.698464 | -0.64133 | 3.1993   | 0.001634 | 0.018463 | -1.42102 |
| AL161668.4  | -3.31693 | 0.890964 | -3.19811 | 0.001641 | 0.01848  | -1.28917 |
| AL357497.1  | -2.73848 | 1.904713 | -3.19853 | 0.001638 | 0.01848  | -1.33476 |
| AL021368.1  | -2.44098 | 2.521908 | -3.19727 | 0.001645 | 0.018484 | -1.42795 |
| L3MBTL4-AS1 | -1.21632 | 5.317565 | -3.19712 | 0.001646 | 0.018484 | -1.80049 |
| PHACTR2-AS1 | -1.12422 | 5.836196 | -3.19659 | 0.001649 | 0.018488 | -1.89633 |
| AC100800.1  | -2.18052 | 1.898742 | -3.19279 | 0.001669 | 0.018677 | -1.30137 |
| AC125437.2  | -0.8916  | 4.16468  | -3.19259 | 0.001671 | 0.018677 | -1.49544 |
| HNF4A-AS1   | -3.34232 | 2.741336 | -3.19118 | 0.001678 | 0.018735 | -1.5023  |
| RNF139-AS1  | 0.693822 | 6.704756 | 3.187945 | 0.001696 | 0.01889  | -1.78771 |
| AC004943.2  | 0.907491 | 7.963841 | 3.187754 | 0.001697 | 0.01889  | -2.00631 |
| STX17-AS1   | -0.9106  | 7.650437 | -3.18577 | 0.001708 | 0.018985 | -2.22397 |
| E2F3-IT1    | 6.249209 | 2.656427 | 3.180543 | 0.001738 | 0.019254 | -1.45196 |
| AC009145.4  | -0.87745 | 5.663181 | -3.18082 | 0.001736 | 0.019254 | -1.87856 |
| AL117379.1  | 0.850259 | 7.842503 | 3.177929 | 0.001752 | 0.01939  | -2.02873 |
| AC058791.1  | -0.81458 | 6.483383 | -3.17553 | 0.001766 | 0.019514 | -2.05534 |
| AC097532.2  | 3.880858 | 2.925962 | 3.172686 | 0.001783 | 0.019667 | -1.41776 |
| DEPDC1-AS1  | 3.887399 | 3.872578 | 3.168223 | 0.001809 | 0.019777 | -1.40167 |
| AC122710.2  | 7.048047 | 2.920361 | 3.169532 | 0.001801 | 0.019777 | -1.47996 |
| AP000526.1  | 6.649522 | 2.522115 | 3.167829 | 0.001811 | 0.019777 | -1.48608 |
| LINC01419   | 5.956392 | -0.18588 | 3.17042  | 0.001796 | 0.019777 | -1.48915 |
| FNDC1-IT1   | 5.940458 | -1.16314 | 3.168653 | 0.001806 | 0.019777 | -1.49522 |
| AC124312.2  | -2.25007 | 4.6901   | -3.17    | 0.001798 | 0.019777 | -1.91108 |
| DLGAP1-AS2  | 1.564438 | 8.651389 | 3.168162 | 0.001809 | 0.019777 | -2.08053 |
| AC100791.2  | 6.171896 | 1.495344 | 3.166541 | 0.001819 | 0.019831 | -1.49388 |
| AC104123.1  | -1.43898 | 4.102031 | -3.16504 | 0.001827 | 0.019899 | -1.63824 |
| AC117394.2  | 8.471974 | 4.927089 | 3.160643 | 0.001854 | 0.020156 | -1.49202 |
| ACTA2-AS1   | -1.04188 | 6.831789 | -3.15931 | 0.001862 | 0.020214 | -2.2116  |
| LINC01612   | -3.85038 | 1.040826 | -3.15863 | 0.001866 | 0.020229 | -1.41843 |
| AC018695.7  | 4.478608 | -0.56363 | 3.156323 | 0.00188  | 0.020352 | -1.52362 |
| AC022387.1  | -4.27517 | -1.33189 | -3.1547  | 0.00189  | 0.020371 | -1.38409 |

|            |          |          |          |          |          |          |
|------------|----------|----------|----------|----------|----------|----------|
| LINC01594  | -3.73582 | 1.638752 | -3.15483 | 0.001889 | 0.020371 | -1.45946 |
| AC015982.1 | 0.790797 | 7.849424 | 3.1552   | 0.001887 | 0.020371 | -2.10683 |
| AC092118.2 | 1.808631 | 6.019056 | 3.15305  | 0.0019   | 0.020451 | -1.52786 |
| AC026369.2 | 2.710032 | 6.865039 | 3.151967 | 0.001907 | 0.020494 | -1.48729 |
| AC104078.1 | 4.48822  | 0.799544 | 3.151451 | 0.00191  | 0.020499 | -1.53085 |
| LINC00163  | -3.17756 | 0.319402 | -3.14989 | 0.00192  | 0.02052  | -1.39946 |
| AC063977.6 | 5.021667 | 1.135829 | 3.150552 | 0.001915 | 0.02052  | -1.53231 |
| AC100830.2 | -1.05116 | 7.395258 | -3.14981 | 0.00192  | 0.02052  | -2.31469 |
| AC008770.3 | -1.20318 | 7.105822 | -3.14687 | 0.001938 | 0.020687 | -2.29325 |
| AC024580.1 | -0.89814 | 7.286229 | -3.1456  | 0.001946 | 0.020742 | -2.28172 |
| AC090709.1 | 7.105772 | 2.336879 | 3.143428 | 0.00196  | 0.020859 | -1.54557 |
| LINC00567  | 4.000772 | 0.514448 | 3.139645 | 0.001984 | 0.021086 | -1.55879 |
| TMEM75     | 2.555965 | 5.530159 | 3.139074 | 0.001988 | 0.021095 | -1.42594 |
| AC020917.3 | -2.12675 | 2.88571  | -3.13785 | 0.001996 | 0.021133 | -1.56784 |
| AL024507.2 | 1.120417 | 6.489568 | 3.137639 | 0.001997 | 0.021133 | -1.75788 |
| AC090515.4 | -2.62308 | 3.3673   | -3.13475 | 0.002016 | 0.021271 | -1.71004 |
| AC008731.1 | -0.57268 | 6.938766 | -3.13517 | 0.002013 | 0.021271 | -2.21659 |
| AC026401.2 | 3.258495 | 6.129917 | 3.134183 | 0.00202  | 0.02128  | -1.43916 |
| AP002518.1 | -2.97706 | -0.25833 | -3.13119 | 0.002039 | 0.021411 | -1.44292 |
| AC073263.2 | 4.58686  | -0.31521 | 3.131085 | 0.00204  | 0.021411 | -1.58291 |
| AL021368.2 | -0.72111 | 5.950571 | -3.13098 | 0.00204  | 0.021411 | -2.07997 |
| AC023813.3 | 6.027383 | 3.566732 | 3.130201 | 0.002046 | 0.021435 | -1.54976 |
| AC112721.1 | 6.50218  | 2.979827 | 3.12732  | 0.002065 | 0.021605 | -1.57869 |
| AC121338.1 | 3.547746 | 2.387559 | 3.124082 | 0.002086 | 0.021801 | -1.54191 |
| AC096656.1 | 6.699771 | 4.060391 | 3.120884 | 0.002108 | 0.021995 | -1.57483 |
| AC006213.3 | -1.1135  | 4.500068 | -3.11967 | 0.002116 | 0.02202  | -1.82025 |
| LINC02363  | -0.99627 | 5.023495 | -3.11974 | 0.002116 | 0.02202  | -1.90833 |
| AC134312.5 | 5.770729 | 5.291216 | 3.118039 | 0.002127 | 0.022105 | -1.53425 |
| AC007639.1 | 2.554162 | 6.983536 | 3.115377 | 0.002146 | 0.022264 | -1.64295 |
| AC012358.1 | -0.78361 | 5.83633  | -3.11444 | 0.002152 | 0.022301 | -2.09563 |
| AC009262.1 | 7.347357 | 2.490049 | 3.111365 | 0.002173 | 0.02249  | -1.62087 |
| AC016737.1 | 1.192456 | 6.771262 | 3.110951 | 0.002176 | 0.02249  | -1.88342 |
| AC079296.1 | -3.66037 | -0.39628 | -3.1101  | 0.002182 | 0.02252  | -1.49644 |
| AC021106.3 | 1.240497 | 8.829012 | 3.107582 | 0.0022   | 0.022672 | -2.36047 |
| AL158196.1 | 1.707301 | 5.909624 | 3.105236 | 0.002216 | 0.022788 | -1.61267 |
| AC020656.2 | -2.03271 | 4.528012 | -3.10471 | 0.00222  | 0.022788 | -1.99563 |
| AC108704.2 | -0.67968 | 6.78297  | -3.10505 | 0.002218 | 0.022788 | -2.29463 |
| AC087667.1 | 5.351786 | 1.363432 | 3.101291 | 0.002245 | 0.022926 | -1.64811 |
| AC023043.1 | 1.34976  | 7.939642 | 3.101109 | 0.002246 | 0.022926 | -2.21151 |
| AC046143.1 | 1.024276 | 8.284796 | 3.101177 | 0.002245 | 0.022926 | -2.31101 |
| AC011444.1 | -0.69442 | 7.009354 | -3.10211 | 0.002239 | 0.022926 | -2.34828 |
| AL670729.3 | 5.256097 | 2.998801 | 3.099892 | 0.002255 | 0.022985 | -1.62158 |
| AC107959.2 | 2.722296 | 3.122925 | 3.098076 | 0.002268 | 0.023087 | -1.57227 |
| CTBP1-AS   | -0.67928 | 7.418232 | -3.09481 | 0.002292 | 0.023298 | -2.42872 |
| AC125807.2 | 0.976874 | 8.688999 | 3.094076 | 0.002297 | 0.023321 | -2.40448 |
| AC002066.1 | 5.370115 | 2.976578 | 3.093371 | 0.002302 | 0.023342 | -1.64157 |
| AP000432.2 | 4.755009 | -2.06619 | 3.091021 | 0.00232  | 0.023486 | -1.67982 |
| AL359551.1 | 5.303649 | 0.416684 | 3.090034 | 0.002327 | 0.023529 | -1.67779 |
| MKNK1-AS1  | -0.6344  | 5.539475 | -3.08897 | 0.002335 | 0.023577 | -2.05307 |
| AC084018.2 | -0.67696 | 5.95639  | -3.08828 | 0.00234  | 0.023597 | -2.17188 |
| AC007036.2 | -0.91953 | 7.010271 | -3.0834  | 0.002377 | 0.023935 | -2.42451 |
| Z97652.1   | -1.84609 | 4.218543 | -3.0827  | 0.002382 | 0.023956 | -1.99455 |
| BX255923.2 | 4.000805 | -0.44288 | 3.080777 | 0.002397 | 0.024065 | -1.70109 |
| LINC02225  | 4.230706 | -1.07078 | 3.080443 | 0.002399 | 0.024065 | -1.70289 |
| AC123768.1 | 5.420765 | 2.687331 | 3.079317 | 0.002408 | 0.024119 | -1.68103 |
| AL353135.1 | 5.6086   | -1.36462 | 3.078587 | 0.002413 | 0.024143 | -1.70754 |
| AC097382.1 | -2.05751 | 3.25575  | -3.07795 | 0.002418 | 0.024159 | -1.80521 |
| AL356740.1 | -2.24946 | 4.25259  | -3.07688 | 0.002426 | 0.02421  | -2.08582 |

|              |          |          |          |          |          |          |
|--------------|----------|----------|----------|----------|----------|----------|
| AC016590.2   | -0.85476 | 7.377501 | -3.07647 | 0.00243  | 0.02421  | -2.50143 |
| AC096734.1   | 5.38466  | -0.36586 | 3.07579  | 0.002435 | 0.02423  | -1.7124  |
| AL591845.1   | 1.539033 | 8.371687 | 3.071637 | 0.002467 | 0.024519 | -2.35268 |
| AL117339.4   | -0.89196 | 3.806902 | -3.06933 | 0.002485 | 0.024667 | -1.78313 |
| AL355297.3   | -2.56507 | 2.111412 | -3.06796 | 0.002496 | 0.024742 | -1.74914 |
| AL121990.1   | 5.563828 | -0.00699 | 3.067044 | 0.002503 | 0.024781 | -1.73206 |
| AP003071.2   | -3.34587 | 0.51606  | -3.06619 | 0.00251  | 0.024815 | -1.62798 |
| ERVH48-1     | -1.1406  | 4.976897 | -3.06328 | 0.002534 | 0.025013 | -2.12853 |
| AC108047.1   | 0.875657 | 8.240841 | 3.062608 | 0.002539 | 0.025033 | -2.44132 |
| AL109741.1   | -1.25329 | 6.023516 | -3.06187 | 0.002545 | 0.025059 | -2.35459 |
| AC027627.1   | 5.191389 | 3.556357 | 3.059258 | 0.002566 | 0.02512  | -1.70462 |
| AC117465.1   | 5.756881 | 0.08736  | 3.058568 | 0.002572 | 0.02512  | -1.7515  |
| AL121900.1   | 4.536753 | 0.135399 | 3.057805 | 0.002578 | 0.02512  | -1.75332 |
| AC021945.1   | 1.30086  | 5.861283 | 3.059809 | 0.002562 | 0.02512  | -1.80621 |
| AL162274.3   | -1.2343  | 4.30056  | -3.05984 | 0.002561 | 0.02512  | -1.95126 |
| AC092139.3   | -0.69311 | 5.94151  | -3.05955 | 0.002564 | 0.02512  | -2.26403 |
| AL008582.1   | -1.08982 | 6.22388  | -3.0582  | 0.002575 | 0.02512  | -2.39572 |
| AC093726.1   | -0.67233 | 8.804726 | -3.05813 | 0.002575 | 0.02512  | -2.73578 |
| AC103724.4   | 6.401084 | 1.756794 | 3.056045 | 0.002592 | 0.025163 | -1.75302 |
| FP671120.2   | -0.90411 | 5.345914 | -3.05625 | 0.002591 | 0.025163 | -2.15619 |
| AC074033.1   | -1.83372 | 6.014509 | -3.05607 | 0.002592 | 0.025163 | -2.46252 |
| ASH1L-AS1    | 0.571341 | 8.856812 | 3.055624 | 0.002596 | 0.025164 | -2.59609 |
| AC092198.1   | 4.344048 | 1.334583 | 3.055124 | 0.0026   | 0.025171 | -1.7491  |
| AC005324.5   | 1.296871 | 6.171925 | 3.053873 | 0.00261  | 0.025206 | -1.89963 |
| AC005180.1   | -2.30948 | 3.885747 | -3.05391 | 0.00261  | 0.025206 | -2.07433 |
| AC016583.1   | -2.23939 | 1.462537 | -3.05305 | 0.002617 | 0.02524  | -1.6624  |
| AC008121.3   | -3.36237 | 0.644822 | -3.04925 | 0.002649 | 0.025476 | -1.67803 |
| AF233439.1   | 4.95034  | 2.091532 | 3.048878 | 0.002652 | 0.025476 | -1.75869 |
| LINC02542    | 2.00708  | 8.988577 | 3.049337 | 0.002648 | 0.025476 | -2.41379 |
| FAM66D       | -1.36569 | 4.823296 | -3.04666 | 0.00267  | 0.025622 | -2.16215 |
| AL034347.1   | -2.92866 | 1.816991 | -3.04622 | 0.002674 | 0.025626 | -1.7154  |
| AC025176.1   | 6.387271 | 5.870277 | 3.045164 | 0.002683 | 0.025646 | -1.71098 |
| AL445531.1   | 4.736482 | 2.489736 | 3.045318 | 0.002682 | 0.025646 | -1.75194 |
| AP001363.1   | -0.929   | 7.149289 | -3.0444  | 0.002689 | 0.025675 | -2.56935 |
| AC073862.5   | -3.5689  | -0.98634 | -3.04294 | 0.002702 | 0.02572  | -1.676   |
| AL136982.1   | -1.37218 | 2.637911 | -3.04276 | 0.002703 | 0.02572  | -1.7287  |
| AC073569.2   | 1.022938 | 9.099017 | 3.042631 | 0.002705 | 0.02572  | -2.61037 |
| AL139288.1   | 3.210071 | 3.478626 | 3.041197 | 0.002717 | 0.025772 | -1.71104 |
| AC020978.6   | 3.695247 | 1.487864 | 3.041292 | 0.002716 | 0.025772 | -1.7644  |
| AC093388.1   | 1.135162 | 7.289107 | 3.038299 | 0.002742 | 0.025976 | -2.26735 |
| LINC01655    | 7.760461 | 3.419996 | 3.037308 | 0.00275  | 0.025991 | -1.79015 |
| SLC25A21-AS1 | -1.38242 | 6.512209 | -3.03762 | 0.002748 | 0.025991 | -2.53879 |
| LINC01522    | 6.601383 | 0.9406   | 3.034163 | 0.002778 | 0.026217 | -1.80586 |
| AC079753.1   | -1.79137 | 3.986788 | -3.03375 | 0.002781 | 0.026218 | -1.98206 |
| AC073842.2   | 1.080948 | 6.761316 | 3.031591 | 0.0028   | 0.026364 | -2.13594 |
| LINC02154    | 6.707176 | 3.469163 | 3.029249 | 0.002821 | 0.026525 | -1.80388 |
| AC079790.1   | -4.111   | -1.63682 | -3.02775 | 0.002834 | 0.026613 | -1.71604 |
| AC009121.2   | 4.405218 | 5.000507 | 3.026286 | 0.002847 | 0.026613 | -1.73509 |
| AL512604.3   | 5.071244 | 0.324053 | 3.026914 | 0.002842 | 0.026613 | -1.82404 |
| AC103858.2   | 5.610872 | 0.831374 | 3.026146 | 0.002849 | 0.026613 | -1.8247  |
| AC103740.1   | -1.08316 | 3.650858 | -3.02582 | 0.002851 | 0.026613 | -1.88813 |
| AC010761.4   | -0.82361 | 8.149659 | -3.02736 | 0.002838 | 0.026613 | -2.74363 |
| AC090844.3   | 3.704571 | 3.254687 | 3.02355  | 0.002872 | 0.02677  | -1.76998 |
| LHX1-DT      | 5.464499 | 0.746139 | 3.022835 | 0.002878 | 0.026797 | -1.83249 |
| AC006116.4   | -3.74682 | -0.2272  | -3.01846 | 0.002918 | 0.027067 | -1.74012 |
| AC013643.2   | -2.96509 | 1.109053 | -3.01904 | 0.002913 | 0.027067 | -1.77324 |
| AC025048.4   | 1.288041 | 7.125012 | 3.018696 | 0.002916 | 0.027067 | -2.24553 |
| AC068025.1   | 5.821576 | 4.773942 | 3.016544 | 0.002936 | 0.027119 | -1.79147 |

|            |          |          |          |          |          |          |
|------------|----------|----------|----------|----------|----------|----------|
| LINC01691  | 6.788437 | 2.084086 | 3.015372 | 0.002947 | 0.027119 | -1.84564 |
| LINC00392  | 8.934859 | 2.011251 | 3.014875 | 0.002951 | 0.027119 | -1.84656 |
| AC090643.1 | 4.10217  | -1.96637 | 3.01681  | 0.002933 | 0.027119 | -1.85081 |
| LINC00111  | -2.86558 | 1.997428 | -3.0147  | 0.002953 | 0.027119 | -1.85433 |
| AC087741.3 | 0.956512 | 6.565645 | 3.015448 | 0.002946 | 0.027119 | -2.199   |
| AC010894.2 | 1.09982  | 7.429523 | 3.014906 | 0.002951 | 0.027119 | -2.3614  |
| AC124319.2 | 1.2611   | 7.824653 | 3.015881 | 0.002942 | 0.027119 | -2.40812 |
| AC092159.2 | 2.266373 | 3.209653 | 3.012104 | 0.002977 | 0.027308 | -1.77159 |
| AC010680.1 | -3.3426  | -2.11795 | -3.01157 | 0.002982 | 0.027318 | -1.78062 |
| LINC01546  | 5.735861 | 1.989743 | 3.01081  | 0.002989 | 0.027318 | -1.85544 |
| AC108174.1 | 6.294012 | 1.605743 | 3.01085  | 0.002989 | 0.027318 | -1.85755 |
| AC025857.2 | 1.173371 | 10.83212 | 3.00966  | 0.003    | 0.027384 | -2.93123 |
| AP002884.1 | -0.95429 | 6.887923 | -3.00735 | 0.003021 | 0.027549 | -2.61992 |
| AL451074.5 | 4.512327 | 3.111203 | 3.004081 | 0.003052 | 0.027798 | -1.83294 |
| AL354977.2 | -2.95931 | 1.52561  | -3.00364 | 0.003057 | 0.027802 | -1.84545 |
| AL354864.1 | 4.935951 | 2.166821 | 2.999646 | 0.003095 | 0.028083 | -1.86841 |
| AC010203.2 | -1.42006 | 4.979928 | -2.99989 | 0.003093 | 0.028083 | -2.35584 |
| AP001469.2 | 1.490348 | 7.473254 | 2.994107 | 0.003149 | 0.028538 | -2.36823 |
| AC027243.2 | 5.14338  | 2.086107 | 2.991181 | 0.003178 | 0.028634 | -1.89298 |
| AC026250.1 | 1.839711 | 6.083804 | 2.991108 | 0.003179 | 0.028634 | -1.95607 |
| AC127070.2 | -0.86375 | 4.786704 | -2.9913  | 0.003177 | 0.028634 | -2.20116 |
| AL078581.1 | -0.62492 | 6.739976 | -2.99187 | 0.003171 | 0.028634 | -2.59801 |
| AC010525.1 | -0.77237 | 7.620685 | -2.99196 | 0.00317  | 0.028634 | -2.75417 |
| AC087286.4 | -0.76161 | 6.330348 | -2.98548 | 0.003235 | 0.029105 | -2.56853 |
| AC020900.1 | 5.146716 | 4.982276 | 2.984181 | 0.003248 | 0.029164 | -1.85161 |
| AC121761.2 | -1.16251 | 6.708061 | -2.98406 | 0.003249 | 0.029164 | -2.69507 |
| AC092135.3 | -0.60424 | 6.761021 | -2.98178 | 0.003272 | 0.029335 | -2.63911 |
| LINC01494  | 4.628031 | 2.048157 | 2.979702 | 0.003293 | 0.029481 | -1.91185 |
| AL121895.2 | -1.74565 | 6.931437 | -2.97942 | 0.003296 | 0.029481 | -2.81213 |
| AC005476.2 | 0.874866 | 7.013407 | 2.977098 | 0.00332  | 0.029659 | -2.44686 |
| AC092964.1 | 1.9716   | 5.330677 | 2.975683 | 0.003335 | 0.029754 | -1.8752  |
| AL355483.1 | 7.393871 | 2.766716 | 2.971092 | 0.003382 | 0.030145 | -1.94422 |
| AC116913.1 | 0.503274 | 7.246353 | 2.969491 | 0.003399 | 0.030259 | -2.5821  |
| AC113133.1 | -3.91426 | -2.26631 | -2.96816 | 0.003413 | 0.030274 | -1.87848 |
| MAFA-AS1   | 7.297977 | 2.591704 | 2.967967 | 0.003415 | 0.030274 | -1.95188 |
| AC021739.2 | -0.72459 | 6.634996 | -2.96821 | 0.003413 | 0.030274 | -2.66956 |
| AL391121.1 | -0.58989 | 10.81811 | -2.96781 | 0.003417 | 0.030274 | -3.27646 |
| AL365330.1 | -0.49523 | 8.655747 | -2.96728 | 0.003423 | 0.030288 | -2.95711 |
| LINC01511  | 4.928476 | -1.25052 | 2.966003 | 0.003436 | 0.030372 | -1.96478 |
| AC073934.1 | 5.369227 | -1.31836 | 2.963919 | 0.003458 | 0.030532 | -1.96952 |
| AC127164.1 | -0.74187 | 4.316739 | -2.96336 | 0.003464 | 0.030549 | -2.11607 |
| AC090159.1 | 5.060786 | 0.384562 | 2.960949 | 0.00349  | 0.030706 | -1.97373 |
| AC115989.1 | -1.35702 | 5.305759 | -2.96112 | 0.003488 | 0.030706 | -2.50567 |
| AC009878.1 | -3.57542 | 1.267545 | -2.96016 | 0.003499 | 0.03072  | -1.95975 |
| AL133467.2 | 5.174006 | -1.93441 | 2.960038 | 0.0035   | 0.03072  | -1.97908 |
| AC009118.3 | -0.53728 | 7.748076 | -2.95835 | 0.003518 | 0.030845 | -2.85494 |
| AC106900.1 | 8.608383 | 7.466435 | 2.957625 | 0.003526 | 0.030878 | -1.92622 |
| AL021807.1 | 4.406524 | 7.967515 | 2.954591 | 0.00356  | 0.031096 | -1.96142 |
| AC005840.2 | 1.126721 | 7.886965 | 2.954651 | 0.003559 | 0.031096 | -2.63608 |
| AC078906.1 | -2.85706 | 2.366821 | -2.95406 | 0.003565 | 0.031111 | -2.04345 |
| AC104667.1 | -3.42079 | -0.79484 | -2.95195 | 0.003589 | 0.031277 | -1.90248 |
| AC008738.2 | -2.09742 | 3.883506 | -2.95053 | 0.003604 | 0.031378 | -2.32034 |
| AL133297.1 | 2.698945 | 5.577071 | 2.948069 | 0.003632 | 0.031563 | -1.93217 |
| AL365203.2 | 1.095187 | 8.609466 | 2.947873 | 0.003634 | 0.031563 | -2.78902 |
| AC126474.1 | 1.030796 | 6.312162 | 2.947008 | 0.003644 | 0.031611 | -2.30025 |
| AL023803.3 | 4.926657 | 3.292344 | 2.946048 | 0.003654 | 0.031639 | -1.9703  |
| AC013451.1 | 5.478392 | 0.591679 | 2.945053 | 0.003666 | 0.031639 | -2.00898 |
| AC011239.2 | -1.53439 | 3.774789 | -2.94534 | 0.003662 | 0.031639 | -2.2357  |

|             |          |          |          |          |          |          |
|-------------|----------|----------|----------|----------|----------|----------|
| AC013356.3  | -1.14722 | 5.008409 | -2.94485 | 0.003668 | 0.031639 | -2.42975 |
| LINC02256   | -1.19227 | 6.359076 | -2.94503 | 0.003666 | 0.031639 | -2.7635  |
| AC018653.3  | 0.946375 | 9.02924  | 2.943176 | 0.003687 | 0.031766 | -2.89511 |
| ATP13A4-AS1 | -3.92087 | -1.12886 | -2.94119 | 0.00371  | 0.031876 | -1.92921 |
| AC022405.1  | 4.84797  | 4.497701 | 2.940768 | 0.003714 | 0.031876 | -1.95771 |
| AC106052.1  | 4.919572 | 3.763855 | 2.941544 | 0.003705 | 0.031876 | -1.97048 |
| FP325332.1  | -0.74447 | 6.045939 | -2.94057 | 0.003717 | 0.031876 | -2.61988 |
| AL157402.2  | 5.708185 | 1.108098 | 2.937424 | 0.003753 | 0.032126 | -2.02498 |
| AC022509.4  | 5.204391 | -1.75198 | 2.936906 | 0.003759 | 0.032126 | -2.03055 |
| AC092803.2  | 1.354463 | 7.206392 | 2.937093 | 0.003757 | 0.032126 | -2.449   |
| AL118506.1  | 0.753576 | 8.821552 | 2.934481 | 0.003787 | 0.03233  | -2.91651 |
| AL049830.3  | 2.803526 | 4.194708 | 2.927566 | 0.003868 | 0.032985 | -1.96599 |
| AC145285.6  | 0.552978 | 8.189892 | 2.927047 | 0.003874 | 0.033    | -2.86148 |
| AC093535.2  | -0.71895 | 6.905366 | -2.9257  | 0.00389  | 0.033099 | -2.83136 |
| AC131009.3  | 0.782274 | 8.976216 | 2.925227 | 0.003896 | 0.033109 | -2.95718 |
| AL390037.1  | 6.079083 | 3.355565 | 2.922786 | 0.003925 | 0.033208 | -2.0375  |
| AC017083.1  | 0.923224 | 6.282623 | 2.923064 | 0.003922 | 0.033208 | -2.36457 |
| AL121655.1  | -0.64407 | 7.121993 | -2.92317 | 0.00392  | 0.033208 | -2.8696  |
| AGBL5-IT1   | -0.59196 | 7.677286 | -2.92299 | 0.003923 | 0.033208 | -2.95066 |
| AC027279.4  | -1.11945 | 4.208055 | -2.9221  | 0.003933 | 0.03324  | -2.32833 |
| AC010864.1  | 1.441192 | 5.992147 | 2.921078 | 0.003946 | 0.033286 | -2.13954 |
| AC093673.1  | 1.035534 | 10.41418 | 2.92091  | 0.003948 | 0.033286 | -3.15082 |
| NDUFB2-AS1  | 0.637614 | 6.821465 | 2.92007  | 0.003958 | 0.033334 | -2.59451 |
| AC026124.1  | -0.94279 | 4.004532 | -2.91839 | 0.003978 | 0.033468 | -2.24146 |
| AC092902.2  | -2.58321 | 2.522266 | -2.91638 | 0.004003 | 0.033637 | -2.21045 |
| AL035665.1  | 3.320792 | 2.79569  | 2.914057 | 0.004031 | 0.033823 | -2.02807 |
| HDAC11-AS1  | 5.312609 | 1.800965 | 2.913551 | 0.004037 | 0.033823 | -2.07467 |
| AL356805.1  | -1.26267 | 5.790461 | -2.91348 | 0.004038 | 0.033823 | -2.74683 |
| AC020910.4  | 0.778917 | 8.386383 | 2.912283 | 0.004053 | 0.033909 | -2.90099 |
| AC025171.1  | 0.948971 | 8.79011  | 2.911656 | 0.004061 | 0.033936 | -2.94693 |
| LINC01283   | 4.916369 | -1.92546 | 2.9111   | 0.004068 | 0.033938 | -2.08805 |
| LINC01537   | -1.15389 | 4.134169 | -2.91054 | 0.004075 | 0.033938 | -2.33587 |
| PRR7-AS1    | 1.129567 | 7.302473 | 2.910801 | 0.004071 | 0.033938 | -2.64514 |
| AC147651.4  | 1.340394 | 7.190482 | 2.908912 | 0.004095 | 0.034032 | -2.53407 |
| AP002907.1  | 0.767713 | 7.812743 | 2.909215 | 0.004091 | 0.034032 | -2.81861 |
| SZT2-AS1    | 3.186057 | 3.41744  | 2.903897 | 0.004158 | 0.03437  | -2.03691 |
| CLEC12A-AS1 | 4.211498 | 2.45625  | 2.904809 | 0.004146 | 0.03437  | -2.06961 |
| AL121759.1  | 4.614706 | 2.038578 | 2.904474 | 0.004151 | 0.03437  | -2.08343 |
| LINC01973   | 3.359621 | -0.17938 | 2.903856 | 0.004158 | 0.03437  | -2.10075 |
| AL022326.2  | -2.00939 | 4.081469 | -2.90479 | 0.004147 | 0.03437  | -2.51612 |
| AL356299.2  | 0.847779 | 6.936346 | 2.902277 | 0.004179 | 0.034498 | -2.64161 |
| PRC1-AS1    | 0.870025 | 6.09761  | 2.901441 | 0.004189 | 0.034548 | -2.39502 |
| STK24-AS1   | 1.177853 | 6.115536 | 2.896828 | 0.004248 | 0.034998 | -2.34656 |
| AC093484.4  | 0.906365 | 8.711727 | 2.896063 | 0.004258 | 0.035041 | -2.98039 |
| AC008109.1  | 6.114138 | -1.04578 | 2.895584 | 0.004264 | 0.035054 | -2.12109 |
| AC009121.1  | 2.569191 | 5.813537 | 2.891794 | 0.004314 | 0.035409 | -2.09015 |
| AC007182.1  | 4.646593 | 2.675408 | 2.890462 | 0.004331 | 0.035409 | -2.10492 |
| LINC02042   | 6.939055 | 3.188775 | 2.890973 | 0.004325 | 0.035409 | -2.12132 |
| AC023421.1  | -2.02704 | 2.522574 | -2.89137 | 0.004319 | 0.035409 | -2.19385 |
| AC024940.6  | 1.069992 | 6.674118 | 2.890798 | 0.004327 | 0.035409 | -2.49001 |
| AC109322.1  | 0.862327 | 7.927882 | 2.889747 | 0.004341 | 0.035448 | -2.87229 |
| IBA57-DT    | 2.43146  | 5.549189 | 2.888473 | 0.004358 | 0.035547 | -2.09599 |
| LINC01952   | 5.759995 | 3.433686 | 2.885947 | 0.004391 | 0.035703 | -2.11586 |
| LINC01338   | 6.127366 | 2.305585 | 2.885592 | 0.004396 | 0.035703 | -2.13612 |
| LINC01524   | 4.095492 | -0.60637 | 2.885754 | 0.004394 | 0.035703 | -2.14231 |
| AC005288.1  | 0.651449 | 11.50567 | 2.885711 | 0.004394 | 0.035703 | -3.45178 |
| AC083906.3  | 7.379558 | 3.333382 | 2.884956 | 0.004404 | 0.035734 | -2.13444 |
| AC098828.2  | 5.131526 | 1.229066 | 2.883736 | 0.004421 | 0.035814 | -2.14314 |



|            |          |          |          |          |          |          |
|------------|----------|----------|----------|----------|----------|----------|
| AC107081.2 | 0.586444 | 7.368881 | 2.883182 | 0.004428 | 0.035814 | -2.83181 |
| AC007686.3 | -0.49695 | 6.698714 | -2.88315 | 0.004428 | 0.035814 | -2.87693 |
| AC021242.3 | 1.96307  | 4.343253 | 2.882286 | 0.00444  | 0.03583  | -2.07717 |
| AL034417.2 | -1.10981 | 4.267922 | -2.88239 | 0.004439 | 0.03583  | -2.39749 |
| AL139393.2 | 1.495527 | 7.929654 | 2.879365 | 0.004479 | 0.03611  | -2.81714 |
| AC007878.1 | -0.69539 | 7.167716 | -2.87622 | 0.004522 | 0.036416 | -3.01561 |
| AL139039.3 | -2.55925 | 1.726833 | -2.87265 | 0.004571 | 0.036732 | -2.17349 |
| AC090241.3 | -1.10828 | 3.678288 | -2.873   | 0.004567 | 0.036732 | -2.31799 |
| AC078850.2 | -3.71546 | -0.54598 | -2.87214 | 0.004578 | 0.03675  | -2.09981 |
| PLCH1-AS2  | 5.861212 | 1.243866 | 2.871319 | 0.00459  | 0.036802 | -2.17095 |
| AC096921.2 | -0.91089 | 6.739837 | -2.8707  | 0.004598 | 0.036831 | -2.98275 |
| AC090192.2 | 7.639978 | 3.861077 | 2.865702 | 0.004668 | 0.037311 | -2.17512 |
| AC074351.1 | 5.419024 | -0.15286 | 2.865701 | 0.004668 | 0.037311 | -2.18554 |
| POU6F2-AS1 | -3.83495 | 0.637759 | -2.86405 | 0.004692 | 0.037418 | -2.16351 |
| AC124319.4 | -1.36749 | 4.61928  | -2.86413 | 0.00469  | 0.037418 | -2.61669 |
| LINC00501  | 5.120029 | 3.271877 | 2.860271 | 0.004745 | 0.037766 | -2.16666 |
| AL122023.1 | -0.69398 | 7.239922 | -2.86061 | 0.00474  | 0.037766 | -3.06908 |
| AL451050.2 | 1.007261 | 6.739889 | 2.859695 | 0.004754 | 0.037792 | -2.6484  |
| AF015262.1 | 5.260553 | -0.66643 | 2.859339 | 0.004759 | 0.037792 | -2.20005 |
| KC877982.1 | 6.872189 | -0.15712 | 2.854982 | 0.004821 | 0.03825  | -2.20879 |
| AP002812.3 | -0.95137 | 6.032041 | -2.85445 | 0.004829 | 0.038271 | -2.91807 |
| AL358394.2 | 3.609055 | 0.310614 | 2.850555 | 0.004886 | 0.038681 | -2.21581 |
| AL109811.2 | -0.62647 | 8.442799 | -2.84909 | 0.004908 | 0.038811 | -3.27144 |
| AL161937.1 | 5.152539 | -0.24998 | 2.84822  | 0.00492  | 0.038871 | -2.22374 |
| AC069360.1 | 4.801676 | 4.346108 | 2.845271 | 0.004964 | 0.038971 | -2.18214 |
| AC020658.3 | 2.998886 | 1.54178  | 2.845885 | 0.004955 | 0.038971 | -2.20011 |
| AC012377.1 | 3.091912 | 0.259353 | 2.845719 | 0.004957 | 0.038971 | -2.22263 |
| AC012467.1 | -2.98513 | 2.626009 | -2.84592 | 0.004954 | 0.038971 | -2.43963 |
| AC021224.1 | 0.891136 | 6.239082 | 2.845428 | 0.004962 | 0.038971 | -2.63962 |
| AL139423.1 | -0.67428 | 6.380225 | -2.84615 | 0.004951 | 0.038971 | -2.94565 |
| PLCXD2-AS1 | 5.336745 | 1.871391 | 2.842274 | 0.005009 | 0.039241 | -2.2307  |
| AL022067.1 | 1.981414 | 7.239661 | 2.842541 | 0.005005 | 0.039241 | -2.59973 |
| MHENCN     | 0.66933  | 9.60511  | 2.839934 | 0.005044 | 0.039434 | -3.30464 |
| LINC00641  | -0.65792 | 8.736517 | -2.83994 | 0.005044 | 0.039434 | -3.34768 |
| AC112496.1 | 1.739083 | 6.773963 | 2.836377 | 0.005098 | 0.039774 | -2.54173 |
| AC007787.2 | -0.93689 | 6.211107 | -2.83664 | 0.005094 | 0.039774 | -2.99251 |
| GAS1RR     | -1.53143 | 3.427765 | -2.83414 | 0.005132 | 0.039999 | -2.46797 |
| AP002852.1 | 4.024996 | 3.371329 | 2.833267 | 0.005146 | 0.040021 | -2.2143  |
| AL138724.1 | 0.914515 | 8.397456 | 2.833327 | 0.005145 | 0.040021 | -3.10286 |
| AL445072.1 | 5.560849 | -1.208   | 2.832687 | 0.005155 | 0.040049 | -2.25843 |
| AL592301.1 | 1.813531 | 5.671694 | 2.832169 | 0.005163 | 0.040069 | -2.33348 |
| AC012464.3 | -1.83236 | 1.613152 | -2.83054 | 0.005188 | 0.040224 | -2.2359  |
| AC108134.2 | 1.647401 | 7.055318 | 2.829421 | 0.005205 | 0.040317 | -2.53853 |
| AC125611.4 | 2.091632 | 3.148862 | 2.826145 | 0.005256 | 0.040587 | -2.21299 |
| FO680682.1 | 5.981139 | 3.702001 | 2.826203 | 0.005256 | 0.040587 | -2.24893 |
| AC136603.1 | -2.6626  | 1.838762 | -2.82672 | 0.005247 | 0.040587 | -2.29629 |
| AL133325.3 | -3.53434 | -0.11065 | -2.82446 | 0.005283 | 0.040749 | -2.22374 |
| FP671120.5 | -1.08083 | 10.77153 | -2.82372 | 0.005295 | 0.040798 | -3.72278 |
| C17orf82   | 2.117273 | 5.99207  | 2.822325 | 0.005317 | 0.040856 | -2.35862 |
| AC007490.1 | -2.93052 | 3.602794 | -2.82221 | 0.005318 | 0.040856 | -2.64316 |
| AC079907.1 | 0.971075 | 6.754859 | 2.822724 | 0.00531  | 0.040856 | -2.75798 |
| AL596247.1 | 1.084161 | 7.11369  | 2.821722 | 0.005326 | 0.040874 | -2.83583 |
| AC023157.3 | 1.083761 | 9.131348 | 2.820961 | 0.005338 | 0.040925 | -3.23031 |
| AL355482.1 | -3.01169 | 0.177255 | -2.81811 | 0.005384 | 0.041232 | -2.24104 |
| AL441992.1 | 0.852653 | 9.466226 | 2.814676 | 0.005439 | 0.041613 | -3.32271 |
| OCIAD1-AS1 | 1.299083 | 7.510306 | 2.811228 | 0.005495 | 0.042    | -2.90677 |
| GSEC       | 1.393462 | 7.001102 | 2.810215 | 0.005512 | 0.042083 | -2.77696 |
| AC005808.1 | 5.755021 | 0.143359 | 2.808965 | 0.005532 | 0.042197 | -2.30793 |

|            |          |          |          |          |          |          |
|------------|----------|----------|----------|----------|----------|----------|
| AC092681.2 | -1.83423 | 2.435943 | -2.80817 | 0.005545 | 0.042254 | -2.35377 |
| AL031320.2 | -0.64228 | 5.903745 | -2.80769 | 0.005553 | 0.042272 | -2.93079 |
| AC004704.1 | 5.607193 | -0.27138 | 2.806624 | 0.005571 | 0.042362 | -2.31344 |
| AP002478.1 | 6.090123 | 4.301269 | 2.804312 | 0.005609 | 0.042611 | -2.28842 |
| AL354928.1 | 4.843807 | 4.544153 | 2.802318 | 0.005643 | 0.04282  | -2.27679 |
| AP001962.1 | 5.52152  | 3.236829 | 2.799993 | 0.005682 | 0.043017 | -2.30591 |
| AC063926.3 | -2.10598 | 1.700136 | -2.79985 | 0.005684 | 0.043017 | -2.31338 |
| AC118754.2 | -2.09201 | 3.958383 | -2.79975 | 0.005686 | 0.043017 | -2.80221 |
| AP000766.1 | -0.49729 | 7.691033 | -2.79927 | 0.005694 | 0.043035 | -3.27515 |
| LINC02302  | -3.45738 | -0.91982 | -2.79737 | 0.005726 | 0.043235 | -2.27646 |
| AC040977.1 | 0.728755 | 8.469007 | 2.796961 | 0.005733 | 0.043243 | -3.24404 |
| AC013565.1 | -1.867   | 3.716576 | -2.79634 | 0.005743 | 0.043279 | -2.64324 |
| AC099398.1 | 3.694476 | -0.59415 | 2.795189 | 0.005763 | 0.043383 | -2.33833 |
| AC016723.1 | 5.131063 | -0.6973  | 2.79486  | 0.005769 | 0.043383 | -2.33909 |
| AC004241.2 | -1.27108 | 5.712511 | -2.79402 | 0.005783 | 0.043405 | -3.04119 |
| AC016394.1 | 0.677925 | 8.446907 | 2.79401  | 0.005783 | 0.043405 | -3.25196 |
| AC011893.1 | 4.199906 | -0.06786 | 2.791479 | 0.005827 | 0.043687 | -2.3456  |
| LINC02208  | -3.27938 | -1.51643 | -2.79099 | 0.005835 | 0.043707 | -2.29317 |
| AC068299.1 | 4.428441 | -0.59614 | 2.790011 | 0.005852 | 0.043746 | -2.34936 |
| ZNF236-DT  | -0.62422 | 7.372959 | -2.79003 | 0.005852 | 0.043746 | -3.26481 |
| AC004080.4 | 5.025149 | 1.289243 | 2.789109 | 0.005867 | 0.043776 | -2.34806 |
| LINC01583  | 4.497264 | -0.35221 | 2.789333 | 0.005864 | 0.043776 | -2.35055 |
| AC104472.1 | 4.138411 | 2.646397 | 2.786099 | 0.00592  | 0.044123 | -2.33002 |
| AL355483.4 | 5.238638 | 0.350303 | 2.78528  | 0.005934 | 0.044186 | -2.35834 |
| AC105020.5 | -0.88578 | 5.789832 | -2.78478 | 0.005943 | 0.044207 | -3.02889 |
| AC091814.1 | 5.082805 | -0.16375 | 2.7842   | 0.005953 | 0.04424  | -2.36123 |
| AC090673.1 | 5.85845  | 1.235395 | 2.783217 | 0.00597  | 0.044324 | -2.36134 |
| UBE2E1-AS1 | 4.428017 | 1.659869 | 2.782026 | 0.005991 | 0.044408 | -2.355   |
| AL357093.2 | -1.27977 | 4.762136 | -2.78191 | 0.005994 | 0.044408 | -2.84169 |
| AC090618.1 | -3.78431 | -1.3629  | -2.78028 | 0.006022 | 0.044446 | -2.31517 |
| AC046158.2 | -1.38944 | 5.322054 | -2.78033 | 0.006021 | 0.044446 | -3.03814 |
| LINC00513  | -0.8145  | 6.249364 | -2.78091 | 0.006011 | 0.044446 | -3.11995 |
| AC127070.4 | -0.77279 | 6.352904 | -2.78125 | 0.006005 | 0.044446 | -3.13253 |
| AC005523.1 | 5.136126 | 2.962979 | 2.775813 | 0.006102 | 0.044945 | -2.36006 |
| AC064807.1 | 0.691289 | 8.283472 | 2.775726 | 0.006104 | 0.044945 | -3.27472 |
| SNHG19     | 0.901897 | 12.78239 | 2.775492 | 0.006108 | 0.044945 | -3.89689 |
| AC087286.2 | -0.75518 | 6.998503 | -2.7749  | 0.006119 | 0.044979 | -3.26293 |
| AC022217.2 | 4.981783 | 1.630669 | 2.772554 | 0.006161 | 0.045115 | -2.38121 |
| AC027279.1 | -0.63849 | 6.118008 | -2.77271 | 0.006158 | 0.045115 | -3.09156 |
| AL080317.3 | -0.45544 | 7.211689 | -2.77313 | 0.006151 | 0.045115 | -3.26363 |
| AC006329.1 | 1.486929 | 9.544195 | 2.772678 | 0.006159 | 0.045115 | -3.36104 |
| TGFB3-AS1  | -2.29765 | 2.724783 | -2.77095 | 0.00619  | 0.045284 | -2.53325 |
| C2-AS1     | 5.195433 | 3.551303 | 2.768027 | 0.006244 | 0.04563  | -2.36743 |
| AC112722.1 | -0.99426 | 5.793938 | -2.76747 | 0.006254 | 0.045661 | -3.10933 |
| AL137802.2 | 2.146775 | 5.357783 | 2.766305 | 0.006275 | 0.045772 | -2.39805 |
| AC084125.4 | 1.118456 | 7.160057 | 2.762474 | 0.006346 | 0.046245 | -2.99847 |
| RASA3-IT1  | -3.76331 | -0.92034 | -2.75795 | 0.006431 | 0.046502 | -2.37289 |
| AC092112.1 | 5.938695 | 3.213987 | 2.759542 | 0.006401 | 0.046502 | -2.39823 |
| LMNB1-DT   | 4.552122 | 0.624744 | 2.758248 | 0.006425 | 0.046502 | -2.41486 |
| AC018616.1 | 5.957092 | 0.266018 | 2.758264 | 0.006425 | 0.046502 | -2.41566 |
| AC087239.1 | 2.475363 | 5.808608 | 2.759923 | 0.006394 | 0.046502 | -2.45106 |
| AC007327.2 | -2.91868 | 1.250365 | -2.75802 | 0.00643  | 0.046502 | -2.45456 |
| AC022400.2 | 0.977842 | 6.171701 | 2.7602   | 0.006389 | 0.046502 | -2.79042 |
| AC117503.2 | 0.667174 | 7.511186 | 2.758254 | 0.006425 | 0.046502 | -3.18347 |
| AL590708.1 | 2.28567  | 5.474894 | 2.756915 | 0.00645  | 0.046509 | -2.41818 |
| AC012213.3 | 1.410592 | 6.081794 | 2.757062 | 0.006448 | 0.046509 | -2.57483 |
| AC073896.2 | -0.41698 | 8.250953 | -2.75735 | 0.006442 | 0.046509 | -3.45923 |
| AL137246.1 | -3.03611 | 0.531056 | -2.75591 | 0.006469 | 0.046557 | -2.40052 |

|            |          |          |          |          |          |          |
|------------|----------|----------|----------|----------|----------|----------|
| GCC2-AS1   | 0.891269 | 6.861785 | 2.755935 | 0.006469 | 0.046557 | -2.96602 |
| AL110115.1 | 1.421307 | 6.568033 | 2.753918 | 0.006507 | 0.046747 | -2.80701 |
| AC087289.3 | 0.577501 | 6.819317 | 2.753857 | 0.006508 | 0.046747 | -3.05434 |
| AC009652.2 | 4.789803 | 3.526356 | 2.751916 | 0.006546 | 0.046924 | -2.39981 |
| AC073857.1 | 0.639855 | 9.211575 | 2.751983 | 0.006544 | 0.046924 | -3.47927 |
| AC015853.1 | 0.912807 | 6.518145 | 2.750922 | 0.006565 | 0.047016 | -2.8967  |
| AL139022.2 | -0.62645 | 6.603944 | -2.74746 | 0.006631 | 0.047449 | -3.25357 |
| AC091729.3 | 0.882527 | 9.151766 | 2.746675 | 0.006647 | 0.047512 | -3.4615  |
| AL034374.1 | 5.399939 | 1.634882 | 2.745766 | 0.006664 | 0.047593 | -2.43925 |
| AP003465.1 | -3.80827 | -0.79312 | -2.74529 | 0.006673 | 0.047614 | -2.4008  |
| AL096870.2 | 0.508941 | 6.741766 | 2.743788 | 0.006703 | 0.047778 | -3.09059 |
| AL355073.2 | -2.0108  | 4.054674 | -2.74317 | 0.006715 | 0.047819 | -2.84246 |
| AC092111.1 | -0.95431 | 4.404233 | -2.74279 | 0.006722 | 0.047827 | -2.80999 |
| AL162511.1 | -3.73053 | -1.04728 | -2.74148 | 0.006748 | 0.047965 | -2.4058  |
| AL137918.1 | 3.058833 | 3.679206 | 2.740835 | 0.006761 | 0.04801  | -2.40885 |
| AC090409.1 | 3.157915 | 4.991552 | 2.738353 | 0.00681  | 0.048276 | -2.41417 |
| LINC01806  | 2.407757 | 8.416232 | 2.738287 | 0.006811 | 0.048276 | -3.05817 |
| AL157762.1 | -1.62939 | 4.533896 | -2.73753 | 0.006826 | 0.048338 | -2.97494 |
| AC015849.5 | 2.835826 | 4.724428 | 2.736731 | 0.006842 | 0.048404 | -2.41878 |
| AC007292.1 | 0.626028 | 7.708664 | 2.735722 | 0.006862 | 0.048501 | -3.29666 |
| AC104667.2 | -1.64378 | 5.203954 | -2.73509 | 0.006875 | 0.048545 | -3.13306 |
| AC019077.1 | 4.671636 | 3.467054 | 2.734579 | 0.006885 | 0.048571 | -2.43757 |
| AC022028.2 | 4.108876 | -2.33383 | 2.733095 | 0.006915 | 0.048736 | -2.47106 |
| AL139424.1 | 4.50559  | 1.262633 | 2.732215 | 0.006933 | 0.048815 | -2.46631 |
| AL031666.1 | -0.70834 | 6.198206 | -2.73083 | 0.006961 | 0.048966 | -3.20166 |
| AC006557.1 | 4.025361 | 3.748109 | 2.73049  | 0.006968 | 0.048969 | -2.43831 |
| AL136162.1 | 1.662895 | 6.592826 | 2.728271 | 0.007013 | 0.04924  | -2.79731 |
| LINC02160  | -4.02594 | -0.75249 | -2.7275  | 0.007028 | 0.049304 | -2.44891 |
| AC007389.3 | 4.035407 | 2.173616 | 2.725878 | 0.007062 | 0.049491 | -2.46563 |
| AC107952.2 | -1.07954 | 6.417904 | -2.72546 | 0.00707  | 0.049505 | -3.34163 |
| AC010913.1 | 1.063631 | 4.362162 | 2.724794 | 0.007084 | 0.049554 | -2.49898 |
| LINC02367  | 1.370814 | 5.401155 | 2.722289 | 0.007136 | 0.04987  | -2.58806 |
| AC022400.5 | -0.48818 | 5.982938 | -2.72187 | 0.007144 | 0.049884 | -3.14622 |
| AC012363.2 | 5.051306 | 0.465942 | 2.721509 | 0.007152 | 0.04989  | -2.49261 |
| AC073195.1 | 0.965672 | 6.853895 | 2.720321 | 0.007176 | 0.050016 | -3.05232 |
| LINC00601  | 4.804086 | -1.25553 | 2.719629 | 0.007191 | 0.050069 | -2.49816 |
| AC135507.1 | -0.60555 | 6.360996 | -2.71609 | 0.007265 | 0.050539 | -3.27307 |
| AL160291.1 | 4.37344  | 0.617164 | 2.713904 | 0.007311 | 0.050813 | -2.50772 |
| AC123912.2 | -3.27433 | -1.74719 | -2.71227 | 0.007346 | 0.050879 | -2.47282 |
| AC015818.2 | 5.185822 | -0.59036 | 2.713085 | 0.007329 | 0.050879 | -2.51116 |
| ARMC2-AS1  | -3.47837 | 0.537468 | -2.71186 | 0.007355 | 0.050879 | -2.57201 |
| AC105384.1 | -2.06095 | 2.436268 | -2.71273 | 0.007336 | 0.050879 | -2.62899 |
| AC145098.1 | 0.94869  | 7.953118 | 2.712136 | 0.007349 | 0.050879 | -3.34177 |
| PSORS1C3   | -1.89375 | 7.843338 | -2.7115  | 0.007362 | 0.050885 | -3.68305 |
| LINC02003  | 3.115133 | 3.127684 | 2.708006 | 0.007437 | 0.051355 | -2.48625 |
| AC005759.1 | -1.87223 | 2.540686 | -2.70538 | 0.007494 | 0.051699 | -2.64537 |
| AC110048.2 | -1.33569 | 2.730007 | -2.7049  | 0.007504 | 0.051723 | -2.5806  |
| LINC00896  | -1.04295 | 5.050074 | -2.70349 | 0.007535 | 0.051886 | -3.05197 |
| AC024257.4 | -1.60561 | 4.02758  | -2.70257 | 0.007555 | 0.051976 | -2.95074 |
| FAM225B    | 2.017358 | 2.274473 | 2.70179  | 0.007572 | 0.052046 | -2.4994  |
| AC125257.1 | 0.736768 | 10.85977 | 2.701277 | 0.007583 | 0.052075 | -3.84499 |
| LINC02371  | -3.26535 | 0.07153  | -2.70085 | 0.007592 | 0.052091 | -2.51911 |
| AC087289.6 | 0.964851 | 6.663726 | 2.698387 | 0.007646 | 0.05232  | -3.08976 |
| AL596094.1 | 0.893179 | 7.14219  | 2.698917 | 0.007635 | 0.05232  | -3.21611 |
| AL049597.2 | 0.794274 | 7.614839 | 2.698692 | 0.00764  | 0.05232  | -3.34118 |
| AC008875.1 | 2.918438 | 5.168843 | 2.696582 | 0.007686 | 0.05249  | -2.52141 |
| AC011595.2 | 4.881797 | -0.0727  | 2.695999 | 0.007699 | 0.05249  | -2.54612 |
| AC016405.3 | 1.314919 | 5.328985 | 2.696627 | 0.007685 | 0.05249  | -2.68815 |

|            |          |          |          |          |          |          |
|------------|----------|----------|----------|----------|----------|----------|
| AC114947.2 | 0.987212 | 6.404977 | 2.696081 | 0.007697 | 0.05249  | -3.03553 |
| AC008750.7 | 5.14686  | 1.671255 | 2.694563 | 0.007731 | 0.052619 | -2.54571 |
| AL137804.1 | 5.308219 | -0.38362 | 2.694513 | 0.007732 | 0.052619 | -2.54944 |
| AC027279.2 | -1.37405 | 3.994431 | -2.69411 | 0.007741 | 0.052632 | -2.90819 |
| SYNPR-AS1  | -2.1824  | 5.141108 | -2.69372 | 0.00775  | 0.052645 | -3.30632 |
| AC090617.2 | 5.197446 | 1.932107 | 2.693065 | 0.007764 | 0.052696 | -2.54704 |
| AC020763.4 | 0.965148 | 6.225211 | 2.691743 | 0.007794 | 0.052849 | -3.00685 |
| LINC02599  | 3.823102 | -0.32007 | 2.691194 | 0.007806 | 0.052885 | -2.55616 |
| FP325330.3 | 4.287652 | 1.603356 | 2.690553 | 0.007821 | 0.052897 | -2.54843 |
| AC011483.1 | 6.610048 | 2.639295 | 2.690489 | 0.007822 | 0.052897 | -2.55313 |
| AL161644.1 | -2.64018 | 1.224094 | -2.68994 | 0.007835 | 0.052933 | -2.58871 |
| AC018809.2 | -0.47602 | 7.632058 | -2.68919 | 0.007852 | 0.053    | -3.55443 |
| AC069281.2 | 0.784782 | 8.096091 | 2.687545 | 0.007889 | 0.053203 | -3.45619 |
| AC004069.1 | 1.031687 | 6.329417 | 2.68707  | 0.007899 | 0.053228 | -3.00605 |
| AC109361.1 | 1.770317 | 3.156743 | 2.686377 | 0.007915 | 0.053249 | -2.52839 |
| AC027698.1 | -3.61208 | -0.15504 | -2.68569 | 0.007931 | 0.053249 | -2.54668 |
| AL121992.1 | 1.16816  | 4.118553 | 2.685876 | 0.007927 | 0.053249 | -2.56853 |
| AC018629.1 | 3.123614 | 10.04884 | 2.686121 | 0.007921 | 0.053249 | -3.4449  |
| AC069281.1 | 5.119487 | 0.317038 | 2.68406  | 0.007968 | 0.05345  | -2.57037 |
| AC093642.2 | -2.39641 | 0.540829 | -2.68194 | 0.008017 | 0.053728 | -2.5572  |
| AC007406.3 | 2.411448 | 5.938007 | 2.681616 | 0.008024 | 0.05373  | -2.6128  |
| AL109615.2 | 3.715197 | 1.624426 | 2.680467 | 0.008051 | 0.05386  | -2.56373 |
| AP000695.2 | 1.762177 | 6.943673 | 2.679898 | 0.008064 | 0.0539   | -2.97397 |
| AC011815.3 | -0.73279 | 7.558895 | -2.67838 | 0.008099 | 0.054087 | -3.60151 |
| AL157823.2 | -1.79598 | 3.501149 | -2.67714 | 0.008128 | 0.054218 | -2.88607 |
| AC131934.1 | -0.52787 | 7.04299  | -2.67692 | 0.008133 | 0.054218 | -3.49995 |
| MCM8-AS1   | 3.014198 | 3.718822 | 2.676074 | 0.008153 | 0.054301 | -2.55206 |
| AC092634.3 | -3.38072 | -0.0089  | -2.67474 | 0.008184 | 0.05446  | -2.57312 |
| AC105206.1 | 2.088096 | 3.049496 | 2.67392  | 0.008203 | 0.054495 | -2.55615 |
| AC138207.5 | 0.927775 | 8.349334 | 2.6739   | 0.008204 | 0.054495 | -3.50501 |
| AC005899.7 | -1.07363 | 6.136177 | -2.67314 | 0.008222 | 0.054566 | -3.44106 |
| AL356608.1 | -1.86242 | 2.685493 | -2.67179 | 0.008253 | 0.054729 | -2.75794 |
| Z99758.1   | 5.135394 | 0.326899 | 2.668445 | 0.008333 | 0.055157 | -2.60244 |
| AC092279.2 | -1.06744 | 6.972487 | -2.66862 | 0.008329 | 0.055157 | -3.59367 |
| AL133371.3 | 4.817201 | -1.06608 | 2.667728 | 0.00835  | 0.055199 | -2.60507 |
| LINC01504  | -1.19904 | 5.933734 | -2.66756 | 0.008354 | 0.055199 | -3.38154 |
| AL138713.1 | -2.07364 | 1.600796 | -2.66685 | 0.008371 | 0.055263 | -2.63291 |
| AC106772.1 | 5.588852 | 3.412059 | 2.66619  | 0.008387 | 0.05527  | -2.59122 |
| AC011306.1 | -2.04712 | 2.450939 | -2.66649 | 0.008379 | 0.05527  | -2.73737 |
| AC134043.1 | 5.64307  | 1.293423 | 2.665165 | 0.008411 | 0.055335 | -2.60795 |
| LINC01179  | 4.567101 | -1.49269 | 2.665457 | 0.008404 | 0.055335 | -2.61005 |
| AC015813.7 | 1.967879 | 5.609901 | 2.663983 | 0.00844  | 0.055473 | -2.66171 |
| AC106882.1 | 3.264911 | 3.291452 | 2.662844 | 0.008467 | 0.055523 | -2.58391 |
| LNCOC1     | 1.556597 | 4.808476 | 2.662751 | 0.008469 | 0.055523 | -2.65033 |
| CELF2-AS1  | -1.39316 | 3.632405 | -2.66313 | 0.00846  | 0.055523 | -2.90654 |
| LINC01096  | 5.793998 | 1.291114 | 2.660443 | 0.008525 | 0.055594 | -2.61766 |
| AC004877.1 | -1.29851 | 2.569542 | -2.66104 | 0.008511 | 0.055594 | -2.70635 |
| DAPK1-IT1  | -2.42646 | 2.246077 | -2.66023 | 0.00853  | 0.055594 | -2.73674 |
| AC092134.1 | -1.1468  | 4.263988 | -2.66017 | 0.008532 | 0.055594 | -3.0484  |
| AC009831.3 | -1.89979 | 3.898694 | -2.66054 | 0.008523 | 0.055594 | -3.07369 |
| AC007285.2 | 0.791527 | 6.433055 | 2.660399 | 0.008526 | 0.055594 | -3.13331 |
| AC114730.3 | -0.56057 | 7.367133 | -2.66083 | 0.008516 | 0.055594 | -3.5967  |
| AC131025.1 | 4.335359 | 4.15209  | 2.659719 | 0.008543 | 0.055617 | -2.59082 |
| LINC00973  | 5.180304 | -0.04582 | 2.657792 | 0.00859  | 0.055875 | -2.62453 |
| AL132657.2 | -2.51462 | 2.330486 | -2.65617 | 0.00863  | 0.056038 | -2.80357 |
| AC005041.3 | 1.146832 | 7.374846 | 2.656172 | 0.00863  | 0.056038 | -3.31108 |
| AP000553.2 | 5.553246 | 4.159978 | 2.655252 | 0.008652 | 0.056135 | -2.60649 |
| FP236383.3 | -1.49281 | 7.192538 | -2.65483 | 0.008663 | 0.056155 | -3.70562 |

|             |          |          |          |          |          |          |
|-------------|----------|----------|----------|----------|----------|----------|
| AC104958.2  | -1.38143 | 6.722395 | -2.65352 | 0.008695 | 0.056316 | -3.61771 |
| AP001065.1  | -1.57299 | 5.107441 | -2.65273 | 0.008715 | 0.056394 | -3.31748 |
| LRRC2-AS1   | -2.96603 | 0.058879 | -2.65231 | 0.008725 | 0.056413 | -2.61579 |
| AC009407.1  | -1.96894 | 4.295715 | -2.65184 | 0.008737 | 0.05644  | -3.16863 |
| AC016746.1  | 4.548993 | -1.27251 | 2.651364 | 0.008749 | 0.056467 | -2.63861 |
| SPATA13-AS1 | -2.54912 | 2.281822 | -2.65072 | 0.008765 | 0.056523 | -2.78516 |
| AC004257.1  | 5.532433 | 3.260972 | 2.649161 | 0.008804 | 0.056725 | -2.62653 |
| AC012404.2  | -3.16556 | 0.981281 | -2.64876 | 0.008814 | 0.056741 | -2.68983 |
| AC025030.2  | 4.674381 | 0.643326 | 2.648332 | 0.008824 | 0.056761 | -2.64291 |
| AL121672.1  | -0.62923 | 5.257108 | -2.6468  | 0.008863 | 0.05696  | -3.15983 |
| AC004835.1  | 3.055271 | 0.681173 | 2.646443 | 0.008872 | 0.05697  | -2.6394  |
| AC078788.1  | 5.472902 | 1.554987 | 2.644346 | 0.008925 | 0.057261 | -2.64974 |
| AL355607.1  | 6.363829 | 2.037039 | 2.643411 | 0.008949 | 0.057364 | -2.65115 |
| AP001453.4  | 0.855223 | 7.810985 | 2.641719 | 0.008992 | 0.057591 | -3.51917 |
| LINC02321   | 7.973543 | 5.586091 | 2.640267 | 0.009029 | 0.057779 | -2.64502 |
| AC004920.1  | 5.31885  | -0.3797  | 2.639456 | 0.00905  | 0.057863 | -2.66208 |
| AC126773.2  | 2.373676 | 6.290956 | 2.638737 | 0.009068 | 0.057883 | -2.78811 |
| AC011944.2  | -1.03886 | 5.51124  | -2.63903 | 0.00906  | 0.057883 | -3.35796 |
| AC002519.1  | -1.71125 | 1.96239  | -2.63831 | 0.009079 | 0.057904 | -2.72354 |
| AL445686.2  | -3.54659 | -0.63736 | -2.63732 | 0.009105 | 0.058017 | -2.6463  |
| Z69720.2    | 5.862315 | 3.194222 | 2.636926 | 0.009115 | 0.058033 | -2.65569 |
| LINC01705   | 9.237858 | 4.68865  | 2.635768 | 0.009145 | 0.058125 | -2.66302 |
| AC107464.2  | -1.51821 | 4.269373 | -2.63599 | 0.009139 | 0.058125 | -3.13668 |
| AP000695.1  | 1.610769 | 7.105945 | 2.632897 | 0.009219 | 0.05855  | -3.19968 |
| AC078850.1  | -1.48499 | 3.5256   | -2.63252 | 0.009229 | 0.058563 | -2.9432  |
| AC106738.2  | -3.61308 | -1.3018  | -2.63185 | 0.009247 | 0.058587 | -2.65094 |
| AC021683.3  | 2.935729 | 1.112897 | 2.631776 | 0.009249 | 0.058587 | -2.66437 |
| AC004080.2  | 8.757717 | 4.449291 | 2.630057 | 0.009294 | 0.058823 | -2.67464 |
| AC108861.1  | -3.60611 | -0.83403 | -2.62925 | 0.009315 | 0.058908 | -2.67804 |
| AP001767.3  | -1.46961 | 5.061248 | -2.6275  | 0.009361 | 0.059151 | -3.39423 |
| AL022315.1  | -3.06074 | 1.441926 | -2.62699 | 0.009375 | 0.059183 | -2.76059 |
| AC010536.1  | 0.89076  | 5.990018 | 2.626708 | 0.009382 | 0.059183 | -3.09457 |
| AC118755.2  | 5.760893 | 2.312097 | 2.625315 | 0.009419 | 0.059317 | -2.68595 |
| AC012360.3  | 0.62619  | 7.317004 | 2.625469 | 0.009415 | 0.059317 | -3.47829 |
| AC125494.2  | -0.73197 | 6.42771  | -2.62501 | 0.009427 | 0.059318 | -3.52775 |
| AP001094.3  | -3.54504 | -0.87629 | -2.62465 | 0.009437 | 0.059329 | -2.68114 |
| SRGAP2-AS1  | 2.881816 | 1.643156 | 2.623576 | 0.009465 | 0.059459 | -2.67609 |
| AC084809.1  | 0.995492 | 7.011922 | 2.623283 | 0.009473 | 0.059459 | -3.34816 |
| AC137932.2  | 1.582695 | 5.117883 | 2.622845 | 0.009485 | 0.059483 | -2.77808 |
| LY6E-DT     | 2.108262 | 6.080115 | 2.621385 | 0.009524 | 0.059679 | -2.83265 |
| AC011481.4  | 1.178469 | 3.102913 | 2.618846 | 0.009593 | 0.060057 | -2.68151 |
| AC116348.3  | -2.75789 | 1.158289 | -2.61769 | 0.009624 | 0.060203 | -2.74723 |
| AC008079.1  | -0.49636 | 4.628183 | -2.6153  | 0.009689 | 0.060508 | -3.05421 |
| AC109992.2  | 0.954538 | 6.288045 | 2.615327 | 0.009688 | 0.060508 | -3.19474 |
| AL390195.2  | -0.74183 | 6.305204 | -2.61295 | 0.009753 | 0.06086  | -3.55955 |
| AC008736.3  | -2.28967 | 2.162159 | -2.61165 | 0.009789 | 0.060982 | -2.87135 |
| MAN1B1-DT   | 1.073919 | 8.407873 | 2.611816 | 0.009784 | 0.060982 | -3.66309 |
| AC034229.1  | 4.397177 | -0.33098 | 2.610669 | 0.009816 | 0.0611   | -2.72014 |
| AC024884.2  | 2.678674 | 4.447305 | 2.608613 | 0.009873 | 0.061251 | -2.70525 |
| AC114546.2  | -3.30894 | 0.400795 | -2.60869 | 0.009871 | 0.061251 | -2.73712 |
| FER1L6-AS2  | -2.92147 | 0.879209 | -2.60915 | 0.009858 | 0.061251 | -2.75413 |
| AP000892.3  | -0.94452 | 7.227181 | -2.60922 | 0.009856 | 0.061251 | -3.7687  |
| AC011815.2  | -0.73303 | 5.105063 | -2.60684 | 0.009922 | 0.061506 | -3.24695 |
| AC024941.1  | -3.35813 | 0.46318  | -2.60532 | 0.009965 | 0.061718 | -2.76452 |
| LINC02323   | 2.784432 | 7.757819 | 2.604436 | 0.009989 | 0.061821 | -3.12894 |
| AC016705.2  | -1.45583 | 4.058206 | -2.60408 | 0.009999 | 0.061832 | -3.16392 |
| AC016877.3  | 4.908088 | 4.935165 | 2.601007 | 0.010086 | 0.06223  | -2.71483 |
| TRHDE-AS1   | -2.71431 | -0.36337 | -2.60121 | 0.01008  | 0.06223  | -2.7219  |

|              |          |          |          |          |          |          |
|--------------|----------|----------|----------|----------|----------|----------|
| AC120498.4   | 7.911332 | 3.537128 | 2.600573 | 0.010098 | 0.06223  | -2.73547 |
| LINC01526    | 4.87605  | 0.013565 | 2.600426 | 0.010102 | 0.06223  | -2.7404  |
| AC008543.1   | 0.875881 | 5.582936 | 2.600325 | 0.010105 | 0.06223  | -3.03338 |
| C1orf147     | 1.090621 | 5.778151 | 2.597748 | 0.010179 | 0.062579 | -3.00699 |
| AC026740.1   | 1.207067 | 8.274366 | 2.597887 | 0.010175 | 0.062579 | -3.63722 |
| AL645608.7   | 1.401477 | 7.671107 | 2.597394 | 0.010189 | 0.06259  | -3.4897  |
| AC097372.2   | 3.535272 | 5.60664  | 2.596421 | 0.010216 | 0.062658 | -2.75149 |
| AC108673.2   | 0.943288 | 6.853205 | 2.596505 | 0.010214 | 0.062658 | -3.36496 |
| AC010247.2   | 1.831796 | 4.115081 | 2.595328 | 0.010248 | 0.062799 | -2.75492 |
| AC016394.2   | 0.618665 | 8.794365 | 2.594365 | 0.010275 | 0.062917 | -3.82108 |
| AC010359.1   | 1.596343 | 5.599728 | 2.593322 | 0.010306 | 0.062999 | -2.93503 |
| AC253536.3   | -1.00119 | 7.994654 | -2.59342 | 0.010303 | 0.062999 | -3.91952 |
| AC009336.1   | 3.872838 | 1.914356 | 2.589836 | 0.010406 | 0.063564 | -2.74983 |
| AF131215.5   | -1.0204  | 7.762094 | -2.58926 | 0.010423 | 0.063615 | -3.90321 |
| PPM1K-DT     | -1.58624 | 2.690673 | -2.5872  | 0.010484 | 0.063931 | -2.92228 |
| AC039056.2   | 1.164394 | 7.177056 | 2.586378 | 0.010508 | 0.064025 | -3.4524  |
| AC007038.1   | -0.66756 | 6.815653 | -2.58592 | 0.010521 | 0.064055 | -3.70686 |
| AL360093.1   | 3.360502 | 4.274313 | 2.585185 | 0.010543 | 0.064135 | -2.74843 |
| AC005920.1   | -2.4745  | 2.047148 | -2.58466 | 0.010558 | 0.064177 | -2.90631 |
| AL031008.1   | -2.67875 | 1.288472 | -2.58315 | 0.010603 | 0.064396 | -2.85835 |
| HOXA10-AS    | 7.093361 | 6.37579  | 2.582592 | 0.010619 | 0.064444 | -2.75485 |
| AP000688.2   | -2.36994 | 1.504885 | -2.58159 | 0.010649 | 0.064573 | -2.85852 |
| AP000424.2   | 5.411765 | -0.23661 | 2.578525 | 0.01074  | 0.065074 | -2.78418 |
| SMC5-AS1     | -0.52632 | 6.694227 | -2.5781  | 0.010753 | 0.065099 | -3.67642 |
| LINC01775    | 6.531882 | 5.63865  | 2.577455 | 0.010772 | 0.065111 | -2.76685 |
| AL391069.2   | 1.165943 | 6.572725 | 2.577557 | 0.010769 | 0.065111 | -3.2642  |
| LINC02518    | 5.596405 | 0.762712 | 2.576302 | 0.010807 | 0.065215 | -2.78785 |
| AC012640.2   | 0.957272 | 7.818894 | 2.576327 | 0.010806 | 0.065215 | -3.649   |
| AC020661.1   | 1.115551 | 6.821166 | 2.575777 | 0.010823 | 0.065258 | -3.40997 |
| AC091614.1   | 4.302586 | -0.43157 | 2.574814 | 0.010852 | 0.065366 | -2.7917  |
| AL592431.1   | -3.54582 | -0.18766 | -2.57461 | 0.010858 | 0.065366 | -2.80619 |
| AC068196.1   | 3.907105 | 2.296339 | 2.574225 | 0.01087  | 0.065383 | -2.77851 |
| AC006116.10  | -2.71941 | 1.647117 | -2.57375 | 0.010884 | 0.065418 | -2.89733 |
| AC027088.3   | 4.727307 | -0.7381  | 2.573265 | 0.010899 | 0.065454 | -2.79494 |
| AC009041.4   | 0.920979 | 6.92638  | 2.56903  | 0.011028 | 0.066176 | -3.48489 |
| AL512791.1   | -0.6097  | 8.505969 | -2.56807 | 0.011057 | 0.066299 | -4.01428 |
| LINC02527    | 5.505042 | -0.06609 | 2.567296 | 0.011081 | 0.06639  | -2.80631 |
| TBX5-AS1     | 2.711098 | 5.370551 | 2.565948 | 0.011123 | 0.066586 | -2.84287 |
| AL445985.1   | 3.428999 | 2.775682 | 2.564749 | 0.01116  | 0.066754 | -2.79389 |
| AC021755.3   | -3.48983 | -0.38399 | -2.56286 | 0.011218 | 0.067052 | -2.81474 |
| AC104791.1   | 3.229446 | 4.022125 | 2.561047 | 0.011275 | 0.067336 | -2.79944 |
| LINC01391    | 3.733424 | 0.960962 | 2.55983  | 0.011313 | 0.067501 | -2.81683 |
| AC034187.1   | 4.523651 | -1.27574 | 2.559021 | 0.011338 | 0.067501 | -2.82338 |
| AC090970.2   | 1.547674 | 7.074162 | 2.559095 | 0.011336 | 0.067501 | -3.41049 |
| HIF1A-AS2    | 1.077054 | 7.346021 | 2.5591   | 0.011336 | 0.067501 | -3.59636 |
| AC092431.1   | -2.4023  | 2.455973 | -2.55849 | 0.011355 | 0.067524 | -3.02615 |
| AC115522.1   | 1.429013 | 7.716118 | 2.558326 | 0.01136  | 0.067524 | -3.60474 |
| ZMYM4-AS1    | -1.59738 | 3.925167 | -2.5564  | 0.011421 | 0.067831 | -3.28161 |
| AC110285.6   | 1.035834 | 7.405824 | 2.555413 | 0.011452 | 0.067963 | -3.58471 |
| PTOV1-AS2    | 0.469288 | 9.743769 | 2.5544   | 0.011485 | 0.0681   | -4.08464 |
| AC015726.1   | -0.59254 | 7.55166  | -2.55392 | 0.0115   | 0.068136 | -3.90165 |
| SLC25A34-AS1 | 4.415388 | 0.724081 | 2.550211 | 0.011618 | 0.068785 | -2.83908 |
| VAV3-AS1     | -3.64241 | -1.8778  | -2.54882 | 0.011663 | 0.068996 | -2.82513 |
| AC004947.2   | -2.3003  | 1.020507 | -2.5471  | 0.011719 | 0.06906  | -2.89014 |
| RRS1-AS1     | -1.29238 | 2.824948 | -2.54748 | 0.011706 | 0.06906  | -2.94387 |
| AC002511.2   | -2.17194 | 3.830128 | -2.54788 | 0.011693 | 0.06906  | -3.32796 |
| RHPN1-AS1    | 1.201292 | 7.113047 | 2.54706  | 0.01172  | 0.06906  | -3.51323 |
| AC032044.1   | -0.50446 | 7.513856 | -2.54762 | 0.011702 | 0.06906  | -3.89179 |

|            |          |          |          |          |          |          |
|------------|----------|----------|----------|----------|----------|----------|
| AC026782.2 | 6.193772 | 3.293664 | 2.546046 | 0.011753 | 0.069199 | -2.84126 |
| AC116049.2 | 6.849105 | 2.631821 | 2.545293 | 0.011777 | 0.069235 | -2.8469  |
| AC124283.3 | 0.721737 | 6.99443  | 2.545433 | 0.011773 | 0.069235 | -3.59512 |
| AL137191.1 | 2.293906 | 4.338245 | 2.544665 | 0.011798 | 0.069301 | -2.85037 |
| AC099568.1 | 4.862879 | 1.302543 | 2.543236 | 0.011844 | 0.069358 | -2.85201 |
| LINC01422  | -0.96261 | 3.946921 | -2.54325 | 0.011844 | 0.069358 | -3.18972 |
| LINC02175  | -0.87828 | 4.747291 | -2.54353 | 0.011835 | 0.069358 | -3.35597 |
| AC139887.1 | -0.5998  | 8.180775 | -2.5438  | 0.011826 | 0.069358 | -4.0245  |
| AL139023.1 | 6.415541 | 0.802954 | 2.542108 | 0.011881 | 0.06952  | -2.85525 |
| AC079779.2 | -1.34881 | 3.943066 | -2.54171 | 0.011894 | 0.069542 | -3.24323 |
| AC120036.4 | -1.27001 | 4.103148 | -2.54097 | 0.011919 | 0.069619 | -3.26211 |
| AC005722.3 | -2.39553 | 4.137458 | -2.54074 | 0.011926 | 0.069619 | -3.46792 |
| AL391005.1 | -3.30268 | -2.30004 | -2.53958 | 0.011964 | 0.06968  | -2.8435  |
| AL355607.2 | 4.4406   | 1.084274 | 2.539864 | 0.011955 | 0.06968  | -2.85828 |
| AC016596.1 | 1.53668  | 4.246583 | 2.539722 | 0.01196  | 0.06968  | -2.88587 |
| AC106738.1 | -2.68242 | 2.156625 | -2.53891 | 0.011986 | 0.069755 | -3.07007 |
| AC092620.1 | -1.0223  | 5.187421 | -2.53796 | 0.012018 | 0.069884 | -3.51794 |
| HOXC-AS3   | 5.505137 | 4.268583 | 2.537292 | 0.01204  | 0.069938 | -2.85061 |
| AC018752.1 | -1.0745  | 7.59514  | -2.53712 | 0.012046 | 0.069938 | -4       |
| AP003119.2 | 2.125505 | 7.519093 | 2.536179 | 0.012077 | 0.070064 | -3.42517 |
| AC026202.2 | -0.61082 | 6.496433 | -2.53418 | 0.012143 | 0.070353 | -3.77099 |
| YTHDF3-AS1 | 0.69849  | 7.837718 | 2.534126 | 0.012145 | 0.070353 | -3.80605 |
| AC008938.1 | 2.651273 | -0.62133 | 2.532442 | 0.012202 | 0.070625 | -2.87421 |
| AC018904.1 | 0.676133 | 8.872214 | 2.529813 | 0.01229  | 0.071082 | -3.98703 |
| AL136141.1 | 4.213057 | 4.256581 | 2.529444 | 0.012303 | 0.0711   | -2.86443 |
| AC004816.1 | 1.133912 | 9.530128 | 2.52831  | 0.012341 | 0.071267 | -4.04753 |
| MAPK6-DT   | 3.856634 | 4.906627 | 2.526848 | 0.012391 | 0.071498 | -2.87253 |
| AP000640.2 | 3.214277 | 2.87464  | 2.524523 | 0.01247  | 0.071676 | -2.87509 |
| AC024267.6 | 4.025335 | 1.681173 | 2.524945 | 0.012456 | 0.071676 | -2.8829  |
| AC119150.1 | 7.380687 | 3.672555 | 2.525156 | 0.012448 | 0.071676 | -2.88489 |
| AC091182.1 | -0.74482 | 4.693267 | -2.52399 | 0.012488 | 0.071676 | -3.36911 |
| AC046158.3 | -1.04469 | 4.813043 | -2.52543 | 0.012439 | 0.071676 | -3.49952 |
| AC107959.1 | -0.58732 | 5.760818 | -2.52453 | 0.01247  | 0.071676 | -3.61392 |
| AC010327.5 | 0.586259 | 7.30303  | 2.524248 | 0.012479 | 0.071676 | -3.74277 |
| AP002336.3 | 5.36249  | 4.177914 | 2.522356 | 0.012544 | 0.071888 | -2.88035 |
| AC007540.1 | 5.288775 | 0.779614 | 2.522558 | 0.012537 | 0.071888 | -2.89353 |
| AL359711.2 | -0.75559 | 6.003539 | -2.52123 | 0.012583 | 0.072055 | -3.71544 |
| AC111170.1 | 2.199355 | 4.206794 | 2.520762 | 0.012599 | 0.072093 | -2.90465 |
| SIX3-AS1   | 4.651196 | -1.34935 | 2.518784 | 0.012668 | 0.072412 | -2.90206 |
| AP003390.1 | 3.11781  | 7.250679 | 2.518314 | 0.012684 | 0.072412 | -3.21784 |
| AL512303.1 | -1.79186 | 3.921274 | -2.51841 | 0.012681 | 0.072412 | -3.38375 |
| AC011008.2 | -1.08762 | 4.193817 | -2.5178  | 0.012702 | 0.07246  | -3.38345 |
| GHET1      | 1.004473 | 6.063119 | 2.514729 | 0.012809 | 0.073015 | -3.32703 |
| AP002754.1 | 4.12647  | 1.084964 | 2.513578 | 0.012849 | 0.07319  | -2.9087  |
| LINC00237  | 4.146711 | -2.0219  | 2.512919 | 0.012873 | 0.073211 | -2.91376 |
| AC006270.1 | 2.820645 | 6.277047 | 2.513034 | 0.012869 | 0.073211 | -3.04834 |
| AC061992.1 | 3.114017 | 6.058948 | 2.511878 | 0.012909 | 0.073364 | -2.96351 |
| AC134407.1 | -0.45432 | 7.874825 | -2.51138 | 0.012927 | 0.073408 | -4.03713 |
| AC009269.2 | -1.73829 | 3.609509 | -2.51034 | 0.012964 | 0.073562 | -3.30158 |
| AC016745.2 | 2.334403 | 2.389129 | 2.507691 | 0.013058 | 0.073984 | -2.90897 |
| AL031283.1 | 1.986151 | 3.355504 | 2.507876 | 0.013051 | 0.073984 | -2.91347 |
| AL050341.2 | 0.635872 | 9.401775 | 2.506802 | 0.013089 | 0.074108 | -4.13359 |
| LINC01920  | 4.035855 | -1.9047  | 2.505537 | 0.013135 | 0.074308 | -2.92797 |
| AL591767.1 | -2.00068 | 3.04947  | -2.50499 | 0.013154 | 0.074364 | -3.22925 |
| RASA2-IT1  | 1.731434 | 5.123282 | 2.502414 | 0.013247 | 0.074831 | -3.04633 |
| AC134312.1 | -1.11528 | 3.094766 | -2.50163 | 0.013275 | 0.074897 | -3.11103 |
| LINC01402  | -2.58728 | 2.178012 | -2.50154 | 0.013279 | 0.074897 | -3.18461 |
| AC126283.1 | 4.784328 | 1.373188 | 2.500897 | 0.013302 | 0.074972 | -2.93425 |

|               |          |          |          |          |          |          |
|---------------|----------|----------|----------|----------|----------|----------|
| AC007619.1    | -0.57199 | 7.74498  | -2.4998  | 0.013342 | 0.07514  | -4.06041 |
| AC025754.1    | 4.6445   | 2.26616  | 2.498583 | 0.013386 | 0.075292 | -2.93368 |
| AC099811.5    | 2.34595  | 5.130142 | 2.498508 | 0.013389 | 0.075292 | -2.98582 |
| AC116563.1    | 4.865594 | -0.50449 | 2.496647 | 0.013457 | 0.075561 | -2.94444 |
| AC007610.4    | -0.53921 | 4.515563 | -2.49682 | 0.01345  | 0.075561 | -3.31744 |
| AL031848.1    | 7.306853 | 5.352943 | 2.495337 | 0.013505 | 0.075774 | -2.93616 |
| AC105101.1    | -1.21553 | 3.840175 | -2.49474 | 0.013527 | 0.07584  | -3.31844 |
| AC138150.2    | 1.226495 | 6.231323 | 2.494159 | 0.013548 | 0.075904 | -3.35715 |
| LINC00184     | 3.349053 | 3.783791 | 2.493658 | 0.013567 | 0.075951 | -2.9384  |
| AC015712.2    | 0.682193 | 6.96008  | 2.492488 | 0.01361  | 0.076119 | -3.74379 |
| AF131215.6    | -0.94567 | 6.9625   | -2.4923  | 0.013617 | 0.076119 | -4.00642 |
| AL513497.1    | 0.983157 | 6.194648 | 2.491435 | 0.013649 | 0.076241 | -3.40194 |
| AC007834.1    | 5.121316 | 1.297483 | 2.49102  | 0.013664 | 0.07627  | -2.95399 |
| FOXP1-IT1     | -0.64933 | 4.508138 | -2.49056 | 0.013681 | 0.076309 | -3.38643 |
| AC092919.1    | 5.836212 | 1.641533 | 2.489365 | 0.013726 | 0.076392 | -2.95697 |
| AC055811.4    | -0.68191 | 8.88492  | -2.48971 | 0.013713 | 0.076392 | -4.26325 |
| ILF3-DT       | 0.5811   | 10.67899 | 2.489337 | 0.013727 | 0.076392 | -4.36861 |
| AL450322.2    | 4.419602 | 1.871511 | 2.48751  | 0.013795 | 0.076658 | -2.95679 |
| AC007601.1    | -0.49736 | 5.864898 | -2.48762 | 0.013791 | 0.076658 | -3.71973 |
| LINC02555     | 4.039972 | -0.92792 | 2.486122 | 0.013847 | 0.076834 | -2.96489 |
| AC092145.1    | -1.39629 | 3.582497 | -2.48617 | 0.013845 | 0.076834 | -3.25515 |
| AL133264.2    | 4.707191 | 0.20638  | 2.485582 | 0.013867 | 0.07689  | -2.96539 |
| AC097460.3    | -1.49751 | 3.862562 | -2.48484 | 0.013895 | 0.076988 | -3.43999 |
| AC026150.1    | -1.75341 | 3.012746 | -2.48442 | 0.013911 | 0.07702  | -3.27164 |
| AC093278.2    | -0.74693 | 7.6133   | -2.48362 | 0.013941 | 0.07713  | -4.0963  |
| PTPRD-AS1     | -2.09684 | 2.044556 | -2.48247 | 0.013985 | 0.077313 | -3.16143 |
| AL133230.1    | 0.745364 | 6.147301 | 2.481779 | 0.014011 | 0.077401 | -3.51743 |
| AC015727.1    | -1.25794 | 5.672069 | -2.48126 | 0.014031 | 0.077452 | -3.83865 |
| AC087289.2    | 0.595515 | 6.153449 | 2.479303 | 0.014105 | 0.077693 | -3.54246 |
| AF129075.1    | -0.44677 | 6.794954 | -2.47943 | 0.014101 | 0.077693 | -3.93738 |
| AC138028.4    | 0.590668 | 8.66905  | 2.479663 | 0.014092 | 0.077693 | -4.09873 |
| AC110813.1    | -1.3591  | 2.64658  | -2.47826 | 0.014145 | 0.077855 | -3.13929 |
| AC020928.2    | 2.556057 | 3.126513 | 2.476013 | 0.014231 | 0.07819  | -2.9741  |
| AL160408.3    | 3.018606 | 1.983264 | 2.475596 | 0.014248 | 0.07819  | -2.97474 |
| AL160274.1    | -2.11044 | 1.856291 | -2.47584 | 0.014238 | 0.07819  | -3.09256 |
| AL139089.1    | 0.643651 | 7.813809 | 2.475729 | 0.014242 | 0.07819  | -3.94742 |
| AC114956.2    | 2.336101 | 8.323866 | 2.473931 | 0.014312 | 0.078485 | -3.74491 |
| NCBP2-AS1     | 0.703032 | 6.989963 | 2.471359 | 0.014412 | 0.078975 | -3.77156 |
| AC046185.3    | 1.070559 | 6.781203 | 2.469788 | 0.014473 | 0.079252 | -3.64598 |
| AL139384.1    | 1.008943 | 6.727434 | 2.468987 | 0.014504 | 0.079366 | -3.64206 |
| AC099343.2    | -0.53974 | 6.631401 | -2.46808 | 0.01454  | 0.079503 | -3.93981 |
| AP000893.2    | 4.589068 | 1.172943 | 2.46775  | 0.014553 | 0.079516 | -2.99823 |
| AC025244.1    | 6.081058 | 1.605688 | 2.466629 | 0.014597 | 0.079698 | -3.00074 |
| AC019211.1    | 4.931386 | 0.322955 | 2.462646 | 0.014754 | 0.08042  | -3.00917 |
| AL354993.2    | 3.746735 | 7.159404 | 2.462475 | 0.014761 | 0.08042  | -3.15982 |
| AL592430.1    | -0.70807 | 5.658378 | -2.46256 | 0.014757 | 0.08042  | -3.77352 |
| AC004233.4    | 4.34797  | 2.936097 | 2.461194 | 0.014812 | 0.08064  | -3.00333 |
| LINC02450     | 5.472397 | 2.314092 | 2.460561 | 0.014837 | 0.08066  | -3.01048 |
| LINC01137     | 0.75334  | 9.983379 | 2.460648 | 0.014834 | 0.08066  | -4.3094  |
| LINC01126     | 0.716718 | 6.211456 | 2.460183 | 0.014852 | 0.080684 | -3.60318 |
| LINC01087     | 3.743558 | 0.258645 | 2.458658 | 0.014913 | 0.080889 | -3.01633 |
| AL353746.1    | -2.23849 | 0.776686 | -2.45763 | 0.014955 | 0.080889 | -3.04946 |
| AP000696.1    | -2.3655  | 2.812332 | -2.45862 | 0.014915 | 0.080889 | -3.31406 |
| AF287957.1    | -1.09242 | 4.055944 | -2.45798 | 0.014941 | 0.080889 | -3.40952 |
| AC135803.1    | -1.29646 | 5.653847 | -2.45775 | 0.01495  | 0.080889 | -3.899   |
| TNFRSF10A-AS1 | 0.860795 | 9.75815  | 2.458383 | 0.014924 | 0.080889 | -4.27091 |
| AC104260.2    | -1.30553 | 2.734187 | -2.45492 | 0.015064 | 0.081422 | -3.18584 |
| AC002470.1    | 1.190988 | 7.521882 | 2.454107 | 0.015097 | 0.081542 | -3.88301 |



|              |          |          |          |          |          |          |
|--------------|----------|----------|----------|----------|----------|----------|
| AC117490.2   | 0.759017 | 7.374127 | 2.453532 | 0.01512  | 0.081609 | -3.89691 |
| AL049840.5   | -0.54742 | 8.129463 | -2.45232 | 0.01517  | 0.081816 | -4.22852 |
| AC093525.9   | -0.54747 | 5.994506 | -2.45043 | 0.015247 | 0.082174 | -3.84031 |
| AC093382.1   | 5.031643 | 5.051171 | 2.449566 | 0.015282 | 0.082305 | -3.02705 |
| AP005264.3   | 4.726    | -0.98907 | 2.448287 | 0.015335 | 0.082529 | -3.03694 |
| AC010255.1   | -2.55407 | 1.580018 | -2.4466  | 0.015404 | 0.082844 | -3.17127 |
| AL161772.1   | 1.382589 | 7.254707 | 2.445341 | 0.015456 | 0.083064 | -3.74382 |
| AL645608.8   | 3.019565 | 4.629225 | 2.444656 | 0.015485 | 0.083157 | -3.05152 |
| AC069287.3   | 4.434634 | 0.291014 | 2.443943 | 0.015514 | 0.083257 | -3.04458 |
| AC108681.1   | 4.678482 | 3.504576 | 2.443363 | 0.015538 | 0.083327 | -3.03787 |
| AC111152.2   | 4.023889 | 3.725536 | 2.442584 | 0.015571 | 0.083441 | -3.03957 |
| AL033381.1   | -2.18049 | 1.413652 | -2.44155 | 0.015614 | 0.083614 | -3.12122 |
| ATP6V1B1-AS1 | 4.386074 | 1.450832 | 2.44086  | 0.015643 | 0.083692 | -3.04823 |
| HAGLROS      | 2.17345  | 7.072474 | 2.440665 | 0.015651 | 0.083692 | -3.52743 |
| UPK1A-AS1    | 4.474216 | 0.063992 | 2.440383 | 0.015663 | 0.083695 | -3.05149 |
| AC021321.1   | 0.838794 | 5.521734 | 2.436517 | 0.015826 | 0.084445 | -3.40807 |
| AL133243.2   | 0.520112 | 8.936816 | 2.436639 | 0.01582  | 0.084445 | -4.24401 |
| AC007991.4   | 6.472237 | 3.707723 | 2.43557  | 0.015866 | 0.084544 | -3.05537 |
| AC020661.3   | 1.062716 | 6.718832 | 2.435544 | 0.015867 | 0.084544 | -3.66435 |
| RASAL2-AS1   | 0.710489 | 7.179608 | 2.434455 | 0.015913 | 0.084731 | -3.92178 |
| L34079.2     | 3.97526  | 2.441787 | 2.433548 | 0.015952 | 0.084876 | -3.05766 |
| AC109479.1   | 4.669434 | 2.482096 | 2.431715 | 0.01603  | 0.085187 | -3.06305 |
| AC087821.1   | -1.74972 | 3.467194 | -2.43165 | 0.016033 | 0.085187 | -3.47528 |
| AC012625.1   | 5.475415 | 1.988693 | 2.430032 | 0.016102 | 0.085494 | -3.06955 |
| AL445426.1   | -2.71746 | 1.389826 | -2.42975 | 0.016114 | 0.0855   | -3.219   |
| AL135924.2   | 6.309275 | 2.027313 | 2.427333 | 0.016218 | 0.08599  | -3.07491 |
| AL353764.1   | 4.695311 | 5.296775 | 2.426274 | 0.016264 | 0.086173 | -3.07714 |
| AP002812.5   | -0.63153 | 6.919546 | -2.42585 | 0.016283 | 0.086209 | -4.10962 |
| AC022413.1   | 0.968113 | 6.941842 | 2.422979 | 0.016407 | 0.086768 | -3.81251 |
| AC011978.2   | 0.54947  | 6.881442 | 2.422893 | 0.016411 | 0.086768 | -3.88583 |
| AC022929.2   | 3.133452 | 1.272229 | 2.422107 | 0.016446 | 0.086889 | -3.08091 |
| AC016734.2   | 3.158332 | 1.385425 | 2.421442 | 0.016475 | 0.08692  | -3.08195 |
| AC005498.3   | -1.59895 | 3.121475 | -2.42166 | 0.016465 | 0.08692  | -3.40414 |
| AC068580.1   | 0.750762 | 8.576875 | 2.4211   | 0.01649  | 0.086938 | -4.19463 |
| AP002812.2   | -0.80739 | 6.127794 | -2.41977 | 0.016548 | 0.087186 | -4.00093 |
| AC073863.1   | 3.918163 | 2.599706 | 2.419086 | 0.016578 | 0.087222 | -3.08537 |
| AC007009.1   | -2.30882 | 3.797338 | -2.41922 | 0.016572 | 0.087222 | -3.61906 |
| LINC01992    | -3.58261 | -0.41467 | -2.418   | 0.016626 | 0.087351 | -3.12567 |
| AC018638.6   | -0.66532 | 5.069978 | -2.41812 | 0.016621 | 0.087351 | -3.71843 |
| SYNGAP1-AS1  | 2.100489 | 4.522938 | 2.415998 | 0.016715 | 0.087756 | -3.13577 |
| AL139125.1   | 3.059614 | 3.231181 | 2.413938 | 0.016807 | 0.088166 | -3.09681 |
| AC010255.2   | 4.979709 | 1.47735  | 2.413716 | 0.016816 | 0.088166 | -3.10053 |
| AC007598.1   | -0.66048 | 5.213793 | -2.41319 | 0.01684  | 0.088228 | -3.75149 |
| AC084809.2   | 4.154824 | 4.220133 | 2.412455 | 0.016873 | 0.088285 | -3.10064 |
| AC109347.2   | -0.90526 | 7.21071  | -2.41242 | 0.016874 | 0.088285 | -4.22717 |
| AL049552.1   | -0.90813 | 7.150621 | -2.41109 | 0.016934 | 0.088534 | -4.22447 |
| AC116025.1   | -2.33212 | 2.283232 | -2.41018 | 0.016975 | 0.088687 | -3.31993 |
| LINC02438    | 5.202966 | 0.349249 | 2.408901 | 0.017033 | 0.088865 | -3.11044 |
| AL121578.3   | 4.679112 | -1.29651 | 2.409147 | 0.017021 | 0.088865 | -3.1105  |
| AC112484.1   | 0.929836 | 7.046481 | 2.408483 | 0.017051 | 0.088902 | -3.89279 |
| AC091965.5   | -2.60964 | 2.111552 | -2.40808 | 0.01707  | 0.088935 | -3.35267 |
| AC091153.4   | 3.345387 | 4.748381 | 2.407048 | 0.017116 | 0.089117 | -3.1242  |
| AC005291.2   | 4.992643 | 0.475848 | 2.405982 | 0.017165 | 0.089307 | -3.11584 |
| AP000864.1   | 4.452878 | 4.631694 | 2.404879 | 0.017215 | 0.089506 | -3.11623 |
| AC004231.1   | 5.016911 | 3.410642 | 2.403416 | 0.017282 | 0.089791 | -3.1155  |
| AL355388.2   | 0.677646 | 5.730095 | 2.402949 | 0.017303 | 0.08984  | -3.55152 |
| AC010531.8   | 4.230128 | -1.3984  | 2.401313 | 0.017378 | 0.090167 | -3.12511 |
| AC130324.2   | 2.678305 | 5.222507 | 2.400437 | 0.017418 | 0.090314 | -3.18719 |

|             |          |          |          |          |          |          |
|-------------|----------|----------|----------|----------|----------|----------|
| AC005225.2  | -1.75255 | 2.914661 | -2.39987 | 0.017444 | 0.090386 | -3.41992 |
| AC004908.2  | 0.546033 | 8.285889 | 2.396014 | 0.017623 | 0.091249 | -4.24054 |
| AC016745.1  | 5.227603 | 3.771484 | 2.395641 | 0.01764  | 0.091276 | -3.13046 |
| AC015813.6  | 0.689167 | 8.724023 | 2.393557 | 0.017738 | 0.091716 | -4.29617 |
| AJ239322.1  | -2.47763 | 0.121901 | -2.39204 | 0.017809 | 0.09202  | -3.1735  |
| AC004080.1  | 4.470549 | -1.4507  | 2.390522 | 0.01788  | 0.092273 | -3.14511 |
| LRP1-AS     | 2.82771  | 3.892996 | 2.390022 | 0.017904 | 0.092273 | -3.15203 |
| AC144652.1  | 0.973377 | 7.377531 | 2.389957 | 0.017907 | 0.092273 | -4.01244 |
| AC120049.1  | -0.94296 | 6.100949 | -2.39031 | 0.01789  | 0.092273 | -4.07945 |
| AC018638.7  | -0.5965  | 7.173807 | -2.38779 | 0.018009 | 0.092738 | -4.23124 |
| AC009054.2  | 0.644528 | 7.690275 | 2.387223 | 0.018036 | 0.092813 | -4.13059 |
| AC006213.7  | -0.7486  | 4.252516 | -2.38683 | 0.018055 | 0.092845 | -3.58063 |
| AC013549.3  | -2.65011 | 1.149596 | -2.3862  | 0.018085 | 0.092935 | -3.25807 |
| AC022306.3  | -1.17746 | 5.33039  | -2.38512 | 0.018136 | 0.093136 | -3.95076 |
| AC019186.1  | 3.347943 | 5.629671 | 2.384563 | 0.018163 | 0.093209 | -3.21055 |
| AC011731.1  | 4.685484 | 5.419697 | 2.383894 | 0.018195 | 0.09331  | -3.16406 |
| AP005264.7  | -2.46851 | 0.056127 | -2.38337 | 0.01822  | 0.093375 | -3.18315 |
| AC040169.1  | 0.85657  | 8.218295 | 2.383045 | 0.018236 | 0.093391 | -4.22254 |
| POU6F2-AS2  | 8.053303 | 3.325383 | 2.382155 | 0.018278 | 0.093546 | -3.15871 |
| AC024230.1  | 5.108042 | -0.61369 | 2.380376 | 0.018364 | 0.093854 | -3.16362 |
| AC011498.3  | 3.383289 | 4.631468 | 2.380127 | 0.018376 | 0.093854 | -3.17775 |
| AC093458.2  | -1.53556 | 4.403389 | -2.38056 | 0.018355 | 0.093854 | -3.79219 |
| AC099508.2  | 4.331551 | -1.22991 | 2.379468 | 0.018408 | 0.093907 | -3.16545 |
| AC104411.1  | 3.278684 | 6.660845 | 2.379396 | 0.018411 | 0.093907 | -3.29668 |
| AC073592.7  | 3.768906 | 3.156252 | 2.377945 | 0.018482 | 0.094201 | -3.16522 |
| AL138781.1  | 1.095065 | 5.967364 | 2.376706 | 0.018542 | 0.094444 | -3.66098 |
| AC084855.2  | -1.21729 | 3.27067  | -2.37503 | 0.018623 | 0.094795 | -3.48014 |
| AC011352.1  | 4.813716 | 0.752419 | 2.373454 | 0.018701 | 0.095059 | -3.17592 |
| AC092343.1  | -1.8976  | 3.110397 | -2.37363 | 0.018692 | 0.095059 | -3.49976 |
| AC089987.2  | 5.032514 | 1.185201 | 2.371221 | 0.01881  | 0.095553 | -3.17982 |
| TMLHE-AS1   | 1.931635 | 3.035411 | 2.370443 | 0.018849 | 0.095554 | -3.18989 |
| LINC01220   | 1.037873 | 5.983181 | 2.370529 | 0.018845 | 0.095554 | -3.65232 |
| AC012464.1  | -1.06719 | 5.382692 | -2.3705  | 0.018846 | 0.095554 | -3.97877 |
| AC131009.2  | 4.556481 | 1.985133 | 2.368379 | 0.018951 | 0.095981 | -3.18319 |
| AC135050.3  | -0.5852  | 6.785897 | -2.36822 | 0.018959 | 0.095981 | -4.20678 |
| AL121832.3  | 0.830483 | 6.758924 | 2.36707  | 0.019016 | 0.096206 | -3.9183  |
| RBAKDN      | 4.892166 | 2.503291 | 2.366771 | 0.019031 | 0.096217 | -3.18587 |
| AC005831.1  | 1.150318 | 9.175863 | 2.365609 | 0.019089 | 0.096445 | -4.35526 |
| AC027601.5  | -0.55696 | 4.854807 | -2.36534 | 0.019102 | 0.096448 | -3.7221  |
| AP001085.1  | 4.473655 | -0.2106  | 2.363412 | 0.019199 | 0.09687  | -3.1947  |
| AC004449.1  | 4.341492 | 2.697982 | 2.361872 | 0.019276 | 0.097195 | -3.19447 |
| AL161719.1  | -2.199   | 3.304668 | -2.36129 | 0.019305 | 0.097213 | -3.60187 |
| AC013468.1  | -0.6098  | 5.706484 | -2.36152 | 0.019294 | 0.097213 | -3.96712 |
| LINC01397   | 4.045555 | 2.647453 | 2.3604   | 0.01935  | 0.097309 | -3.19737 |
| UMODL1-AS1  | -3.06923 | -2.23874 | -2.3605  | 0.019345 | 0.097309 | -3.20019 |
| LINC02640   | -3.1306  | -0.04644 | -2.35808 | 0.019468 | 0.097709 | -3.26941 |
| AC137630.1  | -1.22634 | 5.400541 | -2.35846 | 0.019448 | 0.097709 | -4.06472 |
| AL031985.3  | 0.706208 | 8.429152 | 2.358058 | 0.019469 | 0.097709 | -4.32629 |
| AP001046.1  | -2.2952  | 0.851336 | -2.35531 | 0.019609 | 0.098281 | -3.28247 |
| AP003110.1  | -1.81635 | 2.735183 | -2.35544 | 0.019602 | 0.098281 | -3.47831 |
| AC239868.2  | 3.586429 | -0.7178  | 2.35403  | 0.019675 | 0.098281 | -3.21197 |
| LINC02287   | -3.02415 | -0.54418 | -2.35407 | 0.019673 | 0.098281 | -3.2362  |
| AC021483.1  | -2.55247 | 1.381869 | -2.35493 | 0.019628 | 0.098281 | -3.33949 |
| AC002064.2  | -0.90928 | 7.152773 | -2.3541  | 0.019671 | 0.098281 | -4.3661  |
| ARHGAP5-AS1 | 0.786326 | 8.772652 | 2.354725 | 0.019639 | 0.098281 | -4.38711 |
| AC233992.3  | 0.820834 | 8.460952 | 2.353506 | 0.019701 | 0.09835  | -4.32086 |
| AC096564.1  | -0.83119 | 3.787574 | -2.35292 | 0.019731 | 0.098435 | -3.54541 |
| AC002310.2  | 1.529464 | 3.551315 | 2.352028 | 0.019777 | 0.098533 | -3.25167 |

|            |          |          |          |          |          |          |
|------------|----------|----------|----------|----------|----------|----------|
| AC006449.5 | 0.973572 | 6.257455 | 2.352057 | 0.019776 | 0.098533 | -3.78575 |
| AC093083.1 | 5.306651 | 1.378291 | 2.351749 | 0.019792 | 0.098539 | -3.2155  |
| LINC01962  | 4.518112 | -0.22745 | 2.350854 | 0.019838 | 0.09863  | -3.21765 |
| AL445363.1 | 3.733451 | -0.58627 | 2.350631 | 0.019849 | 0.09863  | -3.21814 |
| AC087392.4 | -0.52428 | 6.821571 | -2.35092 | 0.019834 | 0.09863  | -4.23908 |
| AC011352.3 | 4.946682 | 0.921226 | 2.349363 | 0.019915 | 0.098817 | -3.22001 |
| AC007494.2 | -0.6564  | 5.777782 | -2.34946 | 0.01991  | 0.098817 | -4.05694 |
| AC024941.2 | -1.34285 | 5.656857 | -2.34914 | 0.019927 | 0.098817 | -4.13605 |
| AC061961.1 | -3.71934 | -0.21835 | -2.34842 | 0.019964 | 0.098938 | -3.28438 |
| AC013400.1 | 3.881988 | 2.929706 | 2.347175 | 0.020029 | 0.099193 | -3.22284 |
| AL078644.2 | 0.843689 | 6.658026 | 2.345276 | 0.020128 | 0.099618 | -3.95056 |
| AC078785.2 | -1.22554 | 3.381834 | -2.34402 | 0.020193 | 0.099877 | -3.53591 |
| AC034199.1 | 2.9526   | 2.468197 | 2.343736 | 0.020209 | 0.099886 | -3.2301  |
| AC097468.1 | -2.68883 | 1.084064 | -2.34085 | 0.020361 | 0.100572 | -3.33528 |
| AC012640.1 | 3.985136 | 3.456322 | 2.340159 | 0.020397 | 0.100685 | -3.23769 |
| AL591806.1 | 3.058955 | 5.156866 | 2.339769 | 0.020418 | 0.100721 | -3.286   |
| AC016575.1 | 4.412581 | 3.475056 | 2.339297 | 0.020443 | 0.10077  | -3.2381  |
| GK-IT1     | 4.052264 | 6.939951 | 2.339035 | 0.020457 | 0.10077  | -3.3439  |
| AC018695.3 | 2.427508 | 5.410595 | 2.338823 | 0.020468 | 0.10077  | -3.34752 |
| AP005137.2 | 5.002374 | 2.96581  | 2.33769  | 0.020528 | 0.100911 | -3.23959 |
| AC068228.1 | 5.234604 | 2.258944 | 2.337527 | 0.020537 | 0.100911 | -3.24068 |
| AC022034.3 | -1.63231 | 4.91258  | -2.3379  | 0.020517 | 0.100911 | -4.03468 |
| AC138904.1 | 3.155978 | 4.227718 | 2.337056 | 0.020562 | 0.100968 | -3.25784 |
| PRRX2-AS1  | 4.794847 | 1.444781 | 2.335969 | 0.02062  | 0.101073 | -3.244   |
| AC005796.1 | -3.53123 | -0.67823 | -2.3359  | 0.020624 | 0.101073 | -3.27915 |
| EIF3J-DT   | -0.37448 | 8.638066 | -2.33597 | 0.02062  | 0.101073 | -4.54754 |
| AL023581.2 | -1.31354 | 4.818056 | -2.3352  | 0.020661 | 0.101124 | -3.97662 |
| AC093690.1 | -0.42241 | 6.00608  | -2.33536 | 0.020652 | 0.101124 | -4.08755 |
| AL133245.1 | -0.57405 | 6.126889 | -2.33469 | 0.020688 | 0.101191 | -4.15587 |
| AC004801.6 | 0.553154 | 6.829083 | 2.333822 | 0.020735 | 0.101354 | -4.08727 |
| AL109954.2 | 4.682383 | 1.738497 | 2.33355  | 0.020749 | 0.10136  | -3.24797 |
| LINC01424  | 1.404585 | 4.919894 | 2.333144 | 0.020771 | 0.1014   | -3.39596 |
| AD000813.1 | 2.965437 | 3.961449 | 2.332483 | 0.020807 | 0.101506 | -3.2679  |
| AC123595.1 | -1.26597 | 4.174595 | -2.33224 | 0.02082  | 0.101506 | -3.72728 |
| AC099518.1 | 3.874608 | 5.62585  | 2.331407 | 0.020865 | 0.101659 | -3.29145 |
| AL357078.1 | -1.43175 | 4.572646 | -2.33089 | 0.020893 | 0.101728 | -3.94051 |
| AC128709.3 | 5.345771 | 1.865742 | 2.330504 | 0.020914 | 0.101754 | -3.25393 |
| AL117350.1 | -1.03472 | 5.135065 | -2.3303  | 0.020925 | 0.101754 | -4.00163 |
| AC092999.1 | -1.22307 | 3.59296  | -2.3298  | 0.020952 | 0.101819 | -3.64118 |
| AL138756.1 | -0.62605 | 7.837499 | -2.32931 | 0.020978 | 0.101881 | -4.46789 |
| CASK-AS1   | 3.931795 | 5.339784 | 2.328833 | 0.021004 | 0.101941 | -3.28648 |
| AC136618.1 | 3.825015 | -1.96957 | 2.328427 | 0.021026 | 0.101982 | -3.25863 |
| LINC02139  | 2.835192 | 1.489385 | 2.32743  | 0.021081 | 0.102134 | -3.25877 |
| AL353803.1 | -2.82602 | 0.586176 | -2.32735 | 0.021085 | 0.102134 | -3.33068 |
| AL391152.1 | 3.421642 | 4.473794 | 2.326287 | 0.021143 | 0.10235  | -3.2787  |
| AL645924.1 | -3.28255 | -0.10569 | -2.32587 | 0.021166 | 0.102394 | -3.33474 |
| AC010533.1 | 2.497493 | 3.607058 | 2.325501 | 0.021186 | 0.102426 | -3.27981 |
| AL162274.1 | -0.87613 | 4.975757 | -2.32475 | 0.021227 | 0.102558 | -3.94635 |
| AC010132.4 | -0.81485 | 5.027781 | -2.32289 | 0.021329 | 0.102987 | -3.93782 |
| MAGEA4-AS1 | 5.217305 | -0.7804  | 2.322602 | 0.021345 | 0.102996 | -3.26893 |
| LINC01698  | 5.026901 | 0.145289 | 2.322319 | 0.021361 | 0.103005 | -3.2693  |
| LINC02421  | -1.17598 | 3.515611 | -2.32145 | 0.021408 | 0.103142 | -3.6047  |
| AL157392.4 | -0.7689  | 6.947667 | -2.32131 | 0.021416 | 0.103142 | -4.37707 |
| AC105389.2 | -2.38036 | 2.164608 | -2.32102 | 0.021433 | 0.103154 | -3.51638 |
| AC138028.6 | 0.927041 | 6.675352 | 2.320544 | 0.021459 | 0.103213 | -3.99427 |
| AC087442.1 | 6.26705  | 2.916989 | 2.31962  | 0.02151  | 0.103267 | -3.27331 |
| AC134312.4 | -2.55733 | 1.101272 | -2.31986 | 0.021497 | 0.103267 | -3.40936 |
| AL161669.1 | -2.28944 | 3.681354 | -2.3196  | 0.021511 | 0.103267 | -3.77707 |

|              |          |          |          |          |          |          |
|--------------|----------|----------|----------|----------|----------|----------|
| AL355304.1   | 3.680357 | 3.34582  | 2.317851 | 0.021608 | 0.103636 | -3.28057 |
| AC040160.1   | 0.792519 | 7.032966 | 2.317719 | 0.021615 | 0.103636 | -4.10981 |
| AC023509.2   | -1.2151  | 2.658791 | -2.31735 | 0.021636 | 0.103668 | -3.47248 |
| AC084262.1   | -3.20619 | 0.252285 | -2.31689 | 0.021662 | 0.103725 | -3.35349 |
| AL355596.1   | 3.901268 | 0.708046 | 2.316183 | 0.021701 | 0.103758 | -3.27997 |
| AL591848.3   | -0.57266 | 5.413753 | -2.31602 | 0.02171  | 0.103758 | -3.99016 |
| AC009509.4   | -0.6647  | 7.221072 | -2.31626 | 0.021697 | 0.103758 | -4.40394 |
| AC084357.2   | 1.064394 | 6.781372 | 2.31577  | 0.021724 | 0.10376  | -3.88358 |
| AP003351.1   | 4.346725 | 0.323639 | 2.314593 | 0.02179  | 0.103896 | -3.28314 |
| AL392023.2   | -3.12596 | -1.61952 | -2.31478 | 0.02178  | 0.103896 | -3.29479 |
| AC008742.1   | 2.190415 | 4.607352 | 2.314519 | 0.021794 | 0.103896 | -3.34369 |
| LINC02642    | 4.225491 | -0.53897 | 2.313893 | 0.021829 | 0.103932 | -3.28457 |
| AL513008.1   | -1.32775 | 7.880568 | -2.314   | 0.021823 | 0.103932 | -4.60709 |
| AC067930.5   | 0.554441 | 6.41378  | 2.313104 | 0.021874 | 0.104077 | -4.03283 |
| AL390066.1   | 0.702109 | 6.864303 | 2.312836 | 0.021889 | 0.104083 | -4.09498 |
| AC022211.4   | 0.872982 | 4.789593 | 2.312028 | 0.021934 | 0.104234 | -3.51261 |
| AF124730.1   | 5.554997 | 2.312581 | 2.311757 | 0.02195  | 0.10424  | -3.28756 |
| AC022816.1   | 4.192716 | 0.694952 | 2.310843 | 0.022001 | 0.104305 | -3.28972 |
| AC064805.1   | 2.610604 | 2.318848 | 2.310677 | 0.022011 | 0.104305 | -3.29321 |
| AC026992.2   | -1.71868 | 1.008864 | -2.3104  | 0.022026 | 0.104305 | -3.34566 |
| P3H2-AS1     | -1.80684 | 3.786097 | -2.31119 | 0.021982 | 0.104305 | -3.81581 |
| AC092535.4   | 0.926488 | 8.217802 | 2.310287 | 0.022033 | 0.104305 | -4.35719 |
| AC096920.1   | -3.08146 | -0.28552 | -2.30879 | 0.022118 | 0.104642 | -3.3572  |
| AC004158.1   | 1.149646 | 3.827628 | 2.30854  | 0.022132 | 0.104643 | -3.36651 |
| AC012074.1   | -0.67476 | 5.579925 | -2.30804 | 0.02216  | 0.104712 | -4.08296 |
| HOMER3-AS1   | 3.280728 | 4.294656 | 2.306862 | 0.022228 | 0.104963 | -3.31454 |
| AC084018.1   | -0.52398 | 9.381991 | -2.3048  | 0.022346 | 0.105454 | -4.74525 |
| AL591846.2   | 4.795967 | 3.890709 | 2.304465 | 0.022365 | 0.105478 | -3.30312 |
| LUARIS       | 3.363056 | 3.091471 | 2.303566 | 0.022416 | 0.105655 | -3.30697 |
| AL121839.2   | -0.9585  | 7.368759 | -2.30292 | 0.022453 | 0.105763 | -4.50853 |
| AC013652.2   | 3.81132  | 0.043714 | 2.302001 | 0.022507 | 0.105881 | -3.30574 |
| AL591623.1   | -0.68841 | 4.457259 | -2.3021  | 0.022501 | 0.105881 | -3.79874 |
| AC002551.1   | -0.95679 | 5.211078 | -2.30144 | 0.022539 | 0.105966 | -4.07779 |
| AC131011.1   | 3.499534 | 4.854079 | 2.299674 | 0.022641 | 0.106332 | -3.33747 |
| AC073517.1   | 0.7301   | 6.232749 | 2.299608 | 0.022645 | 0.106332 | -3.97423 |
| AC125611.3   | 4.023692 | -0.8722  | 2.298747 | 0.022695 | 0.106438 | -3.31171 |
| TBC1D8-AS1   | 0.759876 | 6.392256 | 2.298732 | 0.022696 | 0.106438 | -3.99624 |
| AC116021.1   | 4.359604 | 1.491518 | 2.29799  | 0.022739 | 0.106574 | -3.31238 |
| AP000487.1   | 0.948938 | 7.674647 | 2.297337 | 0.022777 | 0.106685 | -4.27293 |
| TIPARP-AS1   | 0.861821 | 6.981568 | 2.297021 | 0.022795 | 0.106705 | -4.13389 |
| KIAA1614-AS1 | 1.846709 | 3.99918  | 2.295322 | 0.022895 | 0.106984 | -3.37526 |
| AC010168.1   | 1.095843 | 8.184795 | 2.295273 | 0.022898 | 0.106984 | -4.35104 |
| LINC01772    | -0.40077 | 6.934185 | -2.29536 | 0.022893 | 0.106984 | -4.36968 |
| AC011466.2   | 4.551842 | 2.22488  | 2.294972 | 0.022915 | 0.107    | -3.31781 |
| AL356274.2   | 4.42909  | 3.109017 | 2.293785 | 0.022985 | 0.107258 | -3.32151 |
| AC016876.3   | 2.3666   | 5.466739 | 2.293117 | 0.023024 | 0.107375 | -3.45598 |
| AC124861.1   | 4.63313  | -0.08716 | 2.291722 | 0.023106 | 0.107558 | -3.32415 |
| AC020922.3   | 2.826867 | 6.036188 | 2.291991 | 0.023091 | 0.107558 | -3.47755 |
| AL031665.2   | 0.605984 | 8.534264 | 2.29179  | 0.023102 | 0.107558 | -4.49849 |
| AC026782.1   | 4.347979 | -1.38352 | 2.289481 | 0.023239 | 0.108108 | -3.32826 |
| AL021368.3   | -3.03423 | 0.024897 | -2.2889  | 0.023274 | 0.108202 | -3.39327 |
| AL031595.3   | -0.562   | 4.684201 | -2.2871  | 0.023381 | 0.108629 | -3.82932 |
| AC005514.1   | -1.78074 | 4.093797 | -2.28687 | 0.023394 | 0.108629 | -3.92876 |
| AC084064.1   | -3.4025  | -1.50745 | -2.28652 | 0.023415 | 0.10866  | -3.35243 |
| AC107909.2   | 3.895332 | 2.465555 | 2.284885 | 0.023513 | 0.108979 | -3.33752 |
| AL391845.2   | 3.022372 | 3.713424 | 2.284931 | 0.02351  | 0.108979 | -3.35255 |
| AL358473.1   | 2.78169  | 0.559361 | 2.283537 | 0.023594 | 0.109172 | -3.33832 |
| AC007128.2   | 8.0789   | 5.282166 | 2.283224 | 0.023613 | 0.109172 | -3.3392  |

|                 |          |          |          |          |          |          |
|-----------------|----------|----------|----------|----------|----------|----------|
| AC105339.5      | -0.572   | 6.034366 | -2.28337 | 0.023604 | 0.109172 | -4.2243  |
| AC007684.1      | -0.60393 | 6.31602  | -2.28351 | 0.023595 | 0.109172 | -4.31359 |
| AL158068.2      | -2.02105 | 2.866446 | -2.28247 | 0.023658 | 0.109314 | -3.63302 |
| AC007014.2      | 2.587574 | 6.240448 | 2.282206 | 0.023674 | 0.109321 | -3.53788 |
| TMEM202-AS1     | -0.39335 | 6.812707 | -2.28193 | 0.023691 | 0.109331 | -4.379   |
| AC079089.1      | 2.770963 | 3.122445 | 2.280766 | 0.023761 | 0.109588 | -3.35476 |
| HELLPAR         | 0.936549 | 2.484083 | 2.280378 | 0.023785 | 0.109629 | -3.372   |
| AC007218.1      | 3.939291 | -1.93791 | 2.279854 | 0.023817 | 0.109708 | -3.34537 |
| AL355076.2      | -1.66903 | 3.806227 | -2.27941 | 0.023843 | 0.109764 | -3.80213 |
| TM4SF19-AS1     | 2.163239 | 7.095523 | 2.278438 | 0.023903 | 0.109969 | -3.88775 |
| AC011287.2      | 4.853245 | 1.213606 | 2.277498 | 0.02396  | 0.110165 | -3.34923 |
| AL357500.1      | -2.98574 | 0.779395 | -2.27635 | 0.02403  | 0.110419 | -3.46583 |
| AL355483.2      | 4.056876 | 1.388029 | 2.275612 | 0.024075 | 0.110492 | -3.35248 |
| AL357079.1      | 0.553599 | 7.723376 | 2.27571  | 0.024069 | 0.110492 | -4.40599 |
| AC136475.3      | 2.021949 | 8.920335 | 2.274826 | 0.024123 | 0.110645 | -4.35636 |
| AC011498.7      | 0.504051 | 7.106143 | 2.274319 | 0.024154 | 0.110653 | -4.29104 |
| AL359643.3      | 0.795686 | 8.761654 | 2.274344 | 0.024153 | 0.110653 | -4.5602  |
| AC092287.1      | 0.826244 | 7.431816 | 2.273788 | 0.024187 | 0.110735 | -4.3048  |
| LINC01267       | 3.422573 | 0.383136 | 2.273046 | 0.024232 | 0.110809 | -3.35709 |
| AC008124.1      | -0.3587  | 8.272685 | -2.2732  | 0.024223 | 0.110809 | -4.63409 |
| AL162457.2      | 3.933965 | -1.83455 | 2.272228 | 0.024283 | 0.110971 | -3.35883 |
| AC005332.4      | 0.645473 | 8.232648 | 2.271847 | 0.024306 | 0.111011 | -4.49518 |
| AC006213.2      | -0.55634 | 4.559874 | -2.27104 | 0.024356 | 0.111172 | -3.8585  |
| AL121890.4      | -1.07286 | 4.753871 | -2.26901 | 0.024482 | 0.111678 | -4.02817 |
| AC079684.1      | 0.706453 | 7.612762 | 2.268771 | 0.024497 | 0.111678 | -4.36963 |
| AC022874.1      | 4.468951 | -1.11997 | 2.268515 | 0.024513 | 0.111682 | -3.36533 |
| AL589745.1      | -2.16278 | 1.05856  | -2.26806 | 0.024541 | 0.111743 | -3.47462 |
| AL163051.1      | 0.633826 | 6.991155 | 2.267576 | 0.024571 | 0.111813 | -4.22639 |
| AC100778.2      | -0.88199 | 6.084385 | -2.26685 | 0.024617 | 0.111952 | -4.34281 |
| LINC01960       | 2.252075 | 2.557151 | 2.266354 | 0.024647 | 0.112016 | -3.37984 |
| TGFB2-AS1       | 1.255518 | 7.414544 | 2.266145 | 0.02466  | 0.112016 | -4.21751 |
| AC018470.1      | 3.574238 | -1.50708 | 2.26399  | 0.024795 | 0.112104 | -3.37332 |
| AC243967.2      | 5.552875 | 3.176057 | 2.263931 | 0.024799 | 0.112104 | -3.37407 |
| AC005954.2      | 3.330534 | 2.556676 | 2.264466 | 0.024766 | 0.112104 | -3.37733 |
| AC211433.2      | 3.56955  | 5.253722 | 2.26468  | 0.024752 | 0.112104 | -3.41962 |
| AC010173.1      | 1.009943 | 5.316626 | 2.264607 | 0.024757 | 0.112104 | -3.67675 |
| AC109597.2      | -1.39266 | 3.520617 | -2.26458 | 0.024758 | 0.112104 | -3.77527 |
| AC006486.2      | 0.708369 | 5.540591 | 2.26461  | 0.024757 | 0.112104 | -3.82416 |
| AC005753.1      | -1.36464 | 4.71204  | -2.26418 | 0.024784 | 0.112104 | -4.14496 |
| SSSCA1-AS1      | 0.429247 | 8.130695 | 2.263693 | 0.024814 | 0.112104 | -4.5243  |
| AL513327.2      | 3.093044 | 4.728672 | 2.262949 | 0.024861 | 0.112196 | -3.41411 |
| AC104971.1      | 1.865965 | 5.248234 | 2.262896 | 0.024864 | 0.112196 | -3.56765 |
| AL365356.4      | 4.458749 | 6.667671 | 2.260769 | 0.024998 | 0.112619 | -3.44708 |
| AP000695.3      | 1.299895 | 4.950985 | 2.260695 | 0.025003 | 0.112619 | -3.59059 |
| AC006042.1      | -1.62988 | 7.931723 | -2.26076 | 0.024999 | 0.112619 | -4.7728  |
| AC106886.2      | 0.942912 | 6.58571  | 2.260201 | 0.025034 | 0.112625 | -4.09705 |
| LINC00957       | -0.59532 | 7.454273 | -2.26024 | 0.025032 | 0.112625 | -4.57737 |
| AC004943.1      | 0.609024 | 5.910285 | 2.259819 | 0.025059 | 0.112667 | -3.96124 |
| AC138512.1      | -3.30778 | -0.21733 | -2.2593  | 0.025092 | 0.112747 | -3.44079 |
| AC009646.2      | 3.927309 | -1.92937 | 2.258923 | 0.025116 | 0.112758 | -3.38223 |
| AC135048.4      | 0.720828 | 6.247449 | 2.258789 | 0.025124 | 0.112758 | -4.04758 |
| LINC01305       | 3.675675 | 1.669607 | 2.258324 | 0.025154 | 0.112823 | -3.38395 |
| LINC02580       | -1.13222 | 5.13746  | -2.25738 | 0.025214 | 0.113026 | -4.19965 |
| AC020934.1      | 3.867444 | -1.78589 | 2.256139 | 0.025293 | 0.113291 | -3.3871  |
| IQCJ-SCHIP1-AS1 | 4.218062 | 1.83086  | 2.255978 | 0.025303 | 0.113291 | -3.38773 |
| LINC00837       | 2.950789 | -0.44596 | 2.255572 | 0.025329 | 0.11334  | -3.38801 |
| AC073592.10     | 4.564219 | 2.526713 | 2.255057 | 0.025362 | 0.11342  | -3.39009 |
| AC092167.1      | 4.613974 | -0.23277 | 2.252649 | 0.025517 | 0.113941 | -3.39316 |

|            |          |          |          |          |          |          |
|------------|----------|----------|----------|----------|----------|----------|
| AC020891.3 | 5.247408 | 4.051382 | 2.252534 | 0.025524 | 0.113941 | -3.39816 |
| FMR1-IT1   | 0.60218  | 7.291397 | 2.252988 | 0.025495 | 0.113941 | -4.3602  |
| AC092910.3 | 0.533597 | 7.161984 | 2.25208  | 0.025553 | 0.114004 | -4.34229 |
| LIF-AS1    | 3.579175 | 1.991015 | 2.251341 | 0.025601 | 0.114149 | -3.39762 |
| AC091931.1 | 4.376046 | -0.92879 | 2.2508   | 0.025636 | 0.114237 | -3.39642 |
| AL138688.1 | 3.590573 | 0.388256 | 2.249757 | 0.025704 | 0.11447  | -3.39819 |
| AC067747.1 | -2.09756 | 3.171582 | -2.24915 | 0.025743 | 0.114578 | -3.80073 |
| AC093330.1 | -2.33446 | 0.067902 | -2.24823 | 0.025803 | 0.114776 | -3.44896 |
| LINC02334  | -1.13318 | 3.055929 | -2.24753 | 0.025848 | 0.114853 | -3.6346  |
| AC023043.4 | 0.73939  | 8.694171 | 2.247491 | 0.025851 | 0.114853 | -4.61179 |
| AL031058.1 | 1.273084 | 8.576179 | 2.24721  | 0.025869 | 0.114867 | -4.51343 |
| AL118556.1 | 1.645191 | 5.634942 | 2.246912 | 0.025889 | 0.114885 | -3.72998 |
| AC005544.1 | -3.09373 | -0.26096 | -2.24577 | 0.025963 | 0.115148 | -3.46128 |
| AC115618.3 | 0.53538  | 9.862672 | 2.245195 | 0.026001 | 0.115247 | -4.82    |
| LINC02048  | 3.144401 | 0.533489 | 2.243252 | 0.026128 | 0.115743 | -3.40979 |
| AC090771.2 | -3.13357 | -1.49898 | -2.24273 | 0.026162 | 0.115826 | -3.43682 |
| LINC01857  | 5.689    | 4.788079 | 2.242242 | 0.026195 | 0.115901 | -3.41944 |
| AL009178.2 | 1.683435 | 5.039001 | 2.241408 | 0.02625  | 0.116076 | -3.58135 |
| FUT8-AS1   | -0.87268 | 6.066775 | -2.24    | 0.026343 | 0.11642  | -4.37967 |
| AC092802.3 | -2.868   | 0.850133 | -2.23937 | 0.026384 | 0.116534 | -3.52853 |
| AC013549.1 | -0.91197 | 5.516231 | -2.23909 | 0.026403 | 0.116547 | -4.29399 |
| AL450263.1 | -1.14347 | 6.790011 | -2.23873 | 0.026427 | 0.116584 | -4.58106 |
| AJ003147.3 | -0.54094 | 5.520602 | -2.23782 | 0.026488 | 0.116784 | -4.20892 |
| AC093817.1 | 4.300255 | 1.735486 | 2.237027 | 0.02654  | 0.116948 | -3.42101 |
| LINC01254  | 3.474903 | 0.088673 | 2.234667 | 0.026698 | 0.117013 | -3.42456 |
| AP005432.2 | 3.805247 | 3.914592 | 2.235064 | 0.026671 | 0.117013 | -3.43834 |
| AC079228.1 | 1.109946 | 4.539431 | 2.23594  | 0.026613 | 0.117013 | -3.57746 |
| AC011997.1 | 2.393123 | 6.040114 | 2.235293 | 0.026656 | 0.117013 | -3.63932 |
| AC009962.1 | -0.61445 | 4.964267 | -2.23619 | 0.026596 | 0.117013 | -4.04271 |
| AC104982.1 | -0.86855 | 4.969908 | -2.23543 | 0.026647 | 0.117013 | -4.13038 |
| AC019205.1 | 0.932289 | 7.086578 | 2.234697 | 0.026696 | 0.117013 | -4.27679 |
| AC084125.2 | 0.65768  | 6.878906 | 2.234474 | 0.026711 | 0.117013 | -4.28785 |
| AC124283.2 | 0.767898 | 7.3782   | 2.236001 | 0.026609 | 0.117013 | -4.37416 |
| AC133552.5 | -0.65545 | 8.148719 | -2.23459 | 0.026703 | 0.117013 | -4.73713 |
| AC090578.2 | 4.911861 | 1.66874  | 2.233094 | 0.026803 | 0.117078 | -3.42747 |
| SKAP1-AS1  | 3.654328 | 5.102869 | 2.233489 | 0.026777 | 0.117078 | -3.47067 |
| AC008496.2 | -2.17591 | 2.800916 | -2.23354 | 0.026773 | 0.117078 | -3.7312  |
| AC114730.1 | 0.898292 | 5.745222 | 2.233234 | 0.026794 | 0.117078 | -3.95176 |
| AP005131.3 | -0.99437 | 5.587278 | -2.23341 | 0.026782 | 0.117078 | -4.31548 |
| AC010245.2 | -0.48859 | 6.792603 | -2.23159 | 0.026904 | 0.117451 | -4.4962  |
| AC016876.1 | 0.622433 | 9.425703 | 2.231302 | 0.026924 | 0.117468 | -4.77483 |
| AC125437.1 | 0.732065 | 6.758171 | 2.230955 | 0.026948 | 0.117502 | -4.27858 |
| IL10RB-DT  | 0.553044 | 6.451093 | 2.230353 | 0.026988 | 0.117611 | -4.231   |
| AC099560.1 | 4.156484 | -1.59174 | 2.229549 | 0.027043 | 0.11778  | -3.43342 |
| ABALON     | 0.827874 | 6.880787 | 2.22836  | 0.027123 | 0.118063 | -4.25047 |
| AC027575.2 | -0.66109 | 6.759733 | -2.22811 | 0.02714  | 0.118068 | -4.50874 |
| AC010186.3 | 0.811507 | 7.829928 | 2.227872 | 0.027156 | 0.118071 | -4.4865  |
| AC027243.1 | 4.028825 | 2.792803 | 2.227442 | 0.027186 | 0.118129 | -3.44192 |
| AL356488.2 | 3.98251  | 1.958582 | 2.225618 | 0.02731  | 0.118464 | -3.44192 |
| AP006545.1 | -0.81902 | 6.277918 | -2.22607 | 0.027279 | 0.118464 | -4.45256 |
| AC007485.1 | -1.19476 | 6.248074 | -2.22566 | 0.027307 | 0.118464 | -4.50768 |
| LINC01460  | 2.730773 | 2.946091 | 2.225149 | 0.027342 | 0.118511 | -3.45645 |
| AC114401.1 | -2.26105 | 0.784236 | -2.22488 | 0.027361 | 0.118511 | -3.52575 |
| AC004264.2 | -1.122   | 4.094616 | -2.22477 | 0.027368 | 0.118511 | -4.00287 |
| AC115284.2 | -0.66759 | 5.491672 | -2.22433 | 0.027398 | 0.118543 | -4.24933 |
| AL590666.2 | 1.772966 | 9.827323 | 2.224201 | 0.027407 | 0.118543 | -4.68752 |
| AL109930.1 | -1.21062 | 4.290462 | -2.2237  | 0.027442 | 0.118624 | -4.05025 |
| AL355075.1 | 3.999545 | 1.586729 | 2.222707 | 0.02751  | 0.118781 | -3.44631 |

|              |          |          |          |          |          |          |
|--------------|----------|----------|----------|----------|----------|----------|
| AC138356.1   | -0.6428  | 4.141481 | -2.22275 | 0.027507 | 0.118781 | -3.85842 |
| LINC01518    | 5.257289 | 0.751376 | 2.221747 | 0.027576 | 0.118998 | -3.44699 |
| AC131097.3   | 3.268644 | 5.089501 | 2.220682 | 0.027649 | 0.119178 | -3.51151 |
| AC068831.1   | 0.481487 | 5.945131 | 2.220873 | 0.027636 | 0.119178 | -4.0879  |
| AC118344.1   | -0.48121 | 6.710248 | -2.21916 | 0.027755 | 0.119564 | -4.51214 |
| C7orf65      | 3.266972 | -1.92532 | 2.218448 | 0.027804 | 0.119625 | -3.45261 |
| LINC01456    | 4.75876  | -0.12868 | 2.217787 | 0.02785  | 0.119625 | -3.45379 |
| AC144836.1   | 5.009099 | 1.862484 | 2.218016 | 0.027834 | 0.119625 | -3.45384 |
| AC100791.1   | 4.246007 | -1.32062 | 2.217578 | 0.027864 | 0.119625 | -3.45412 |
| AC091152.4   | -0.89947 | 2.991271 | -2.21826 | 0.027817 | 0.119625 | -3.65682 |
| AC016027.1   | 0.478196 | 6.851015 | 2.217978 | 0.027836 | 0.119625 | -4.35175 |
| AC008622.2   | 0.692114 | 6.274554 | 2.217048 | 0.027901 | 0.119715 | -4.18068 |
| LINC02320    | 4.975361 | 2.943378 | 2.216296 | 0.027953 | 0.11981  | -3.45904 |
| AC124016.1   | 0.603245 | 6.846887 | 2.216271 | 0.027955 | 0.11981  | -4.33433 |
| AC092807.2   | 4.836945 | 2.36051  | 2.215583 | 0.028003 | 0.119925 | -3.45921 |
| AL442071.1   | -1.36621 | 4.00276  | -2.21543 | 0.028014 | 0.119925 | -4.0086  |
| AC005358.2   | -1.93877 | 0.747023 | -2.21478 | 0.028059 | 0.120051 | -3.5307  |
| AC024581.1   | 5.657834 | 2.088739 | 2.213879 | 0.028122 | 0.120252 | -3.4608  |
| AC005229.4   | 0.585683 | 8.518824 | 2.213504 | 0.028149 | 0.120296 | -4.67824 |
| AC096887.2   | 0.751825 | 6.791139 | 2.212126 | 0.028245 | 0.120641 | -4.30981 |
| AC012360.2   | -0.71724 | 6.306435 | -2.21141 | 0.028296 | 0.120788 | -4.45735 |
| AL451070.1   | 3.963824 | 2.433656 | 2.210008 | 0.028395 | 0.121141 | -3.47214 |
| EIPR1-IT1    | 3.241967 | 4.084702 | 2.209756 | 0.028413 | 0.121149 | -3.49729 |
| AC017002.1   | 3.182332 | 4.6784   | 2.209508 | 0.02843  | 0.121154 | -3.51021 |
| AL078605.1   | 4.00847  | -0.85994 | 2.208627 | 0.028493 | 0.121352 | -3.46954 |
| AC002076.1   | 6.22745  | 3.416468 | 2.208308 | 0.028515 | 0.121379 | -3.47166 |
| AL355483.3   | 3.893866 | 2.893709 | 2.204221 | 0.028806 | 0.122389 | -3.48529 |
| AC130456.1   | -2.73965 | 1.384762 | -2.20469 | 0.028773 | 0.122389 | -3.62746 |
| AL354813.1   | 1.321249 | 5.423311 | 2.204095 | 0.028815 | 0.122389 | -3.78562 |
| AC114956.3   | 0.524327 | 6.942613 | 2.204063 | 0.028818 | 0.122389 | -4.39746 |
| AC073346.2   | 3.377937 | -1.72904 | 2.202022 | 0.028964 | 0.122942 | -3.48084 |
| AL136172.1   | 2.503737 | 3.385205 | 2.200614 | 0.029065 | 0.123302 | -3.50892 |
| AC023090.2   | -0.45043 | 5.524121 | -2.2     | 0.02911  | 0.12342  | -4.25869 |
| F10-AS1      | -3.28224 | -0.84543 | -2.19937 | 0.029156 | 0.123545 | -3.52877 |
| AL358334.3   | 5.32524  | 4.378858 | 2.19874  | 0.029201 | 0.123668 | -3.49691 |
| AC125494.3   | 4.186036 | 0.908127 | 2.197738 | 0.029273 | 0.123835 | -3.48853 |
| CARNMT1-AS1  | 0.543432 | 6.484054 | 2.197904 | 0.029261 | 0.123835 | -4.29972 |
| AC005383.1   | -1.18807 | 5.246838 | -2.19697 | 0.02933  | 0.124003 | -4.3252  |
| AC022400.1   | 0.557717 | 8.112703 | 2.195101 | 0.029465 | 0.124507 | -4.65782 |
| AL449403.1   | -2.82951 | -0.37139 | -2.1944  | 0.029517 | 0.124514 | -3.54461 |
| AC010976.2   | -1.1852  | 5.962342 | -2.19443 | 0.029514 | 0.124514 | -4.52297 |
| AL604028.1   | -0.35922 | 9.126292 | -2.19448 | 0.029511 | 0.124514 | -4.93123 |
| AC010761.5   | 1.217796 | 6.131509 | 2.193929 | 0.029551 | 0.124589 | -3.94281 |
| AC005828.2   | 4.007209 | 0.303156 | 2.192556 | 0.029652 | 0.124888 | -3.49722 |
| AC022306.2   | -0.47655 | 8.164585 | -2.19251 | 0.029655 | 0.124888 | -4.80545 |
| FRGCA        | 4.481569 | -1.08691 | 2.190832 | 0.029778 | 0.125205 | -3.5     |
| AC005392.3   | 4.136747 | -1.51924 | 2.19035  | 0.029814 | 0.125205 | -3.50079 |
| AC008474.1   | 3.411896 | 3.117282 | 2.190622 | 0.029794 | 0.125205 | -3.51494 |
| AC016722.2   | -0.34667 | 6.452186 | -2.19045 | 0.029806 | 0.125205 | -4.50386 |
| AC021218.1   | -1.93122 | 5.905087 | -2.19103 | 0.029764 | 0.125205 | -4.601   |
| AC005674.2   | -0.57384 | 6.747439 | -2.18922 | 0.029897 | 0.125486 | -4.60183 |
| AC132192.2   | 0.534727 | 7.542981 | 2.18855  | 0.029947 | 0.125553 | -4.55196 |
| AC008966.1   | -0.54551 | 7.107592 | -2.18877 | 0.029931 | 0.125553 | -4.64357 |
| AP003032.1   | -2.31204 | 2.699456 | -2.188   | 0.029988 | 0.125654 | -3.85048 |
| AC097634.1   | -0.5755  | 4.962804 | -2.18749 | 0.030025 | 0.125742 | -4.17148 |
| NAALADL2-AS2 | 3.791408 | 3.236664 | 2.182504 | 0.030397 | 0.127228 | -3.52678 |
| AC092692.1   | -0.85571 | 3.370029 | -2.18226 | 0.030416 | 0.127235 | -3.79829 |
| AC091946.1   | 4.119805 | -1.42167 | 2.180782 | 0.030527 | 0.127556 | -3.51707 |

|              |          |          |          |          |          |          |
|--------------|----------|----------|----------|----------|----------|----------|
| AC002401.4   | 5.5896   | 4.444056 | 2.180794 | 0.030526 | 0.127556 | -3.52713 |
| AC106799.3   | 4.452045 | 1.284723 | 2.179252 | 0.030642 | 0.127896 | -3.52043 |
| AC008873.1   | -3.12288 | 0.284911 | -2.17946 | 0.030626 | 0.127896 | -3.6543  |
| AL157884.2   | 3.958968 | 0.696073 | 2.178148 | 0.030725 | 0.128173 | -3.52203 |
| AL121906.1   | 3.92077  | 3.408223 | 2.177541 | 0.030771 | 0.128294 | -3.5366  |
| LINC00880    | 2.776585 | 2.597144 | 2.1771   | 0.030805 | 0.128362 | -3.53823 |
| AC017067.1   | -3.2798  | 0.257026 | -2.17521 | 0.030948 | 0.128889 | -3.62236 |
| AP003355.3   | 5.046681 | 0.758666 | 2.174223 | 0.031024 | 0.129131 | -3.52846 |
| LINC01850    | 4.640586 | -0.72263 | 2.172503 | 0.031155 | 0.129396 | -3.53117 |
| AL603839.1   | 4.100049 | 0.297245 | 2.17259  | 0.031148 | 0.129396 | -3.5312  |
| CD200R1L-AS1 | 4.479237 | 2.537638 | 2.173153 | 0.031105 | 0.129396 | -3.53431 |
| AL353622.1   | -0.56605 | 7.277429 | -2.17249 | 0.031156 | 0.129396 | -4.70745 |
| AC008280.3   | -0.50329 | 7.548677 | -2.17087 | 0.031281 | 0.129841 | -4.75936 |
| AC092653.2   | -0.74189 | 5.556003 | -2.17047 | 0.031311 | 0.129894 | -4.39857 |
| AC007952.4   | 3.77441  | 3.041092 | 2.168151 | 0.03149  | 0.130494 | -3.55021 |
| AL158151.4   | 3.65405  | 4.978168 | 2.168369 | 0.031473 | 0.130494 | -3.58751 |
| IGF2-AS      | 3.092044 | 0.753421 | 2.167335 | 0.031553 | 0.130683 | -3.54194 |
| TXNDC12-AS1  | -1.46861 | 4.370004 | -2.16662 | 0.031609 | 0.130842 | -4.25097 |
| AC092574.2   | -0.80964 | 5.991528 | -2.16615 | 0.031645 | 0.130887 | -4.53107 |
| LINC00852    | -0.47651 | 7.665727 | -2.16603 | 0.031655 | 0.130887 | -4.7835  |
| AC114341.1   | 1.821744 | 6.362572 | 2.165195 | 0.031719 | 0.131081 | -3.98934 |
| AL355336.1   | -0.53457 | 5.260752 | -2.16497 | 0.031737 | 0.131081 | -4.26052 |
| LINC02390    | 3.874776 | 0.885438 | 2.162808 | 0.031905 | 0.131663 | -3.54846 |
| AC138305.3   | 0.768151 | 10.86794 | 2.162718 | 0.031912 | 0.131663 | -5.10465 |
| AC008551.1   | 4.54302  | 0.321988 | 2.162367 | 0.03194  | 0.131704 | -3.54845 |
| MYOSLID      | 2.765847 | 7.257607 | 2.162006 | 0.031968 | 0.131749 | -4.05043 |
| LINC02598    | 4.313333 | 0.993213 | 2.161235 | 0.032029 | 0.131925 | -3.55076 |
| AC093227.1   | -0.59355 | 8.51968  | -2.16087 | 0.032057 | 0.13197  | -4.94765 |
| AL022322.2   | -0.5009  | 3.84818  | -2.15966 | 0.032152 | 0.132257 | -3.86488 |
| AC080080.1   | 0.637537 | 6.08892  | 2.159314 | 0.03218  | 0.132257 | -4.22414 |
| AC003102.1   | 0.571916 | 8.065709 | 2.159483 | 0.032166 | 0.132257 | -4.72052 |
| LINC01357    | 7.543989 | 5.235522 | 2.158701 | 0.032228 | 0.132383 | -3.56049 |
| AC231533.1   | 3.522829 | -0.39877 | 2.157774 | 0.032301 | 0.132611 | -3.55611 |
| AC090517.2   | 0.575724 | 7.439217 | 2.15739  | 0.032331 | 0.132663 | -4.60395 |
| AC098798.1   | 3.537129 | -1.33124 | 2.156562 | 0.032397 | 0.132787 | -3.55798 |
| AC104113.1   | -0.46706 | 7.631203 | -2.15659 | 0.032395 | 0.132787 | -4.79939 |
| AC015689.1   | -1.58166 | 4.61067  | -2.15588 | 0.032451 | 0.132935 | -4.32892 |
| AC026254.2   | 4.434517 | 4.198753 | 2.153876 | 0.03261  | 0.133516 | -3.58211 |
| AL049649.1   | 3.901481 | -0.18567 | 2.153624 | 0.032631 | 0.133526 | -3.56309 |
| AC099552.4   | 4.046135 | -1.08385 | 2.15335  | 0.032652 | 0.133526 | -3.5634  |
| AL683887.1   | 6.39001  | 2.241313 | 2.153178 | 0.032666 | 0.133526 | -3.56448 |
| AC005670.1   | 3.846095 | 2.981992 | 2.151945 | 0.032765 | 0.133783 | -3.57786 |
| AP000593.3   | 1.567011 | 5.924778 | 2.15198  | 0.032762 | 0.133783 | -3.9656  |
| CECR3        | 3.563075 | -1.27471 | 2.15149  | 0.032801 | 0.13384  | -3.56649 |
| AP003031.1   | 3.667143 | 3.313343 | 2.151326 | 0.032814 | 0.13384  | -3.58409 |
| AC011592.1   | 3.169178 | -1.84871 | 2.150282 | 0.032898 | 0.134109 | -3.56844 |
| UXT-AS1      | 0.552008 | 5.964138 | 2.149136 | 0.03299  | 0.134266 | -4.23779 |
| AL139161.1   | -1.77643 | 4.230976 | -2.14955 | 0.032957 | 0.134266 | -4.30575 |
| OSGEPL1-AS1  | -0.41389 | 6.330254 | -2.14919 | 0.032986 | 0.134266 | -4.56604 |
| AC006372.3   | 2.975773 | -0.65636 | 2.148598 | 0.033033 | 0.134268 | -3.57152 |
| AC092724.1   | 2.711548 | 0.557333 | 2.148292 | 0.033058 | 0.134268 | -3.57495 |
| WWTR1-AS1    | -0.76301 | 4.690244 | -2.14796 | 0.033084 | 0.134268 | -4.18508 |
| AC105020.6   | -0.42898 | 5.592055 | -2.14798 | 0.033083 | 0.134268 | -4.38887 |
| AC020558.2   | 0.615783 | 7.05014  | 2.147799 | 0.033098 | 0.134268 | -4.53552 |
| AL157838.1   | 0.535462 | 7.634273 | 2.148907 | 0.033008 | 0.134268 | -4.66484 |
| AC022148.1   | -2.39467 | -0.19895 | -2.14728 | 0.03314  | 0.134364 | -3.63225 |
| AL138760.1   | 4.499807 | 2.466892 | 2.14648  | 0.033204 | 0.134555 | -3.58061 |
| AL357874.2   | -1.12568 | 4.404387 | -2.14604 | 0.03324  | 0.134625 | -4.1953  |



|              |          |          |          |          |          |          |
|--------------|----------|----------|----------|----------|----------|----------|
| LINC01543    | 3.667382 | -1.04224 | 2.145375 | 0.033294 | 0.134627 | -3.57677 |
| AC012485.1   | -0.61318 | 4.06967  | -2.1456  | 0.033276 | 0.134627 | -3.99025 |
| AC016831.5   | -0.71144 | 5.458219 | -2.14551 | 0.033283 | 0.134627 | -4.41351 |
| AC009248.2   | 4.450291 | 1.313759 | 2.144904 | 0.033332 | 0.134693 | -3.57875 |
| KLHL30-AS1   | -2.2376  | 0.112406 | -2.14473 | 0.033346 | 0.134693 | -3.64831 |
| AC004066.2   | -3.30405 | -0.03305 | -2.14413 | 0.033395 | 0.134817 | -3.66939 |
| AL109976.1   | 1.708678 | 6.796841 | 2.143703 | 0.03343  | 0.134886 | -4.19799 |
| AC005355.1   | 4.495633 | 3.037017 | 2.141653 | 0.033597 | 0.135488 | -3.59248 |
| AL591468.1   | 4.297879 | 0.626866 | 2.13989  | 0.033741 | 0.135998 | -3.58635 |
| AC092070.4   | 3.657468 | 2.148293 | 2.137895 | 0.033906 | 0.136445 | -3.59679 |
| IL21R-AS1    | 1.998309 | 1.968406 | 2.137438 | 0.033943 | 0.136445 | -3.60816 |
| AC005954.1   | 3.109933 | 4.588878 | 2.138016 | 0.033896 | 0.136445 | -3.64428 |
| AC016245.1   | 0.786946 | 4.050004 | 2.137515 | 0.033937 | 0.136445 | -3.76903 |
| AL157394.1   | 0.752018 | 6.599789 | 2.137788 | 0.033914 | 0.136445 | -4.39603 |
| LINC00656    | 3.625555 | -0.64129 | 2.136974 | 0.033981 | 0.136453 | -3.59085 |
| AC068338.3   | -1.01094 | 5.67015  | -2.13704 | 0.033976 | 0.136453 | -4.56774 |
| AL138995.1   | -1.00034 | 5.255526 | -2.13615 | 0.034049 | 0.136652 | -4.46379 |
| AC130469.1   | 4.009031 | 1.76568  | 2.13445  | 0.03419  | 0.137072 | -3.59927 |
| LINC01686    | 1.757089 | 4.98872  | 2.134459 | 0.03419  | 0.137072 | -3.76858 |
| AC011676.3   | -2.23153 | 2.856617 | -2.13386 | 0.034239 | 0.137122 | -3.98787 |
| Z69733.1     | -1.45071 | 3.815575 | -2.1339  | 0.034236 | 0.137122 | -4.19383 |
| AC069185.1   | -0.70219 | 6.043783 | -2.13254 | 0.034349 | 0.137414 | -4.54189 |
| AC116366.1   | -0.61753 | 7.342908 | -2.13256 | 0.034347 | 0.137414 | -4.8136  |
| Z95115.1     | 0.612263 | 7.76078  | 2.1305   | 0.03452  | 0.138023 | -4.71423 |
| LINC02080    | -0.67297 | 3.650754 | -2.12964 | 0.034592 | 0.138166 | -3.90877 |
| LINC00346    | 1.109496 | 7.398778 | 2.129683 | 0.034588 | 0.138166 | -4.54824 |
| KIAA2012-AS1 | 2.348842 | 1.038873 | 2.129018 | 0.034644 | 0.138299 | -3.61157 |
| MIR583HG     | -1.38096 | 3.572129 | -2.12752 | 0.03477  | 0.138727 | -4.06679 |
| AC026336.3   | 4.411825 | 2.252808 | 2.126152 | 0.034885 | 0.139115 | -3.61394 |
| LINC01143    | 4.191024 | -1.26595 | 2.125906 | 0.034906 | 0.139123 | -3.60915 |
| AL079303.1   | 4.593586 | 3.652614 | 2.123681 | 0.035094 | 0.13978  | -3.62717 |
| AC016526.3   | -1.5548  | 1.47332  | -2.12352 | 0.035108 | 0.13978  | -3.73851 |
| AC103740.2   | 3.478481 | 0.864591 | 2.122568 | 0.035189 | 0.140011 | -3.61716 |
| AC022075.1   | 1.875939 | 7.623126 | 2.122401 | 0.035203 | 0.140011 | -4.41444 |
| AL136301.1   | 4.004248 | 0.37178  | 2.120692 | 0.035349 | 0.140508 | -3.61825 |
| AC068580.2   | 6.37834  | 3.454002 | 2.120497 | 0.035365 | 0.140508 | -3.62133 |
| AC008895.1   | 0.468274 | 6.827036 | 2.120198 | 0.035391 | 0.140535 | -4.55532 |
| AL138789.1   | 5.437057 | 6.72113  | 2.119649 | 0.035438 | 0.140625 | -3.67427 |
| BAIAP2-DT    | 0.541565 | 9.534522 | 2.119496 | 0.035451 | 0.140625 | -5.03332 |
| AC016722.1   | 3.759794 | -0.8547  | 2.117262 | 0.035643 | 0.141023 | -3.62352 |
| AC022031.2   | 7.124368 | 3.427145 | 2.117523 | 0.03562  | 0.141023 | -3.62496 |
| LINC01968    | 2.197154 | 1.814455 | 2.117226 | 0.035646 | 0.141023 | -3.63913 |
| AC020891.2   | 5.374707 | 5.914375 | 2.117016 | 0.035664 | 0.141023 | -3.66134 |
| AC008406.3   | 2.286793 | 5.410385 | 2.117505 | 0.035622 | 0.141023 | -3.8112  |
| AC104083.1   | 0.995974 | 9.701079 | 2.117194 | 0.035649 | 0.141023 | -5.00813 |
| AC097637.2   | -1.15585 | 2.957077 | -2.11594 | 0.035757 | 0.141241 | -3.9124  |
| AC132872.1   | 0.475293 | 8.580751 | 2.115945 | 0.035756 | 0.141241 | -4.90939 |
| AC064801.2   | -0.83524 | 4.852009 | -2.1156  | 0.035786 | 0.141282 | -4.34383 |
| AC129510.2   | 3.966137 | 2.986765 | 2.112477 | 0.036057 | 0.142275 | -3.64532 |
| AP003774.3   | 3.605523 | 0.131686 | 2.111681 | 0.036126 | 0.142474 | -3.6332  |
| AC010969.1   | 3.25135  | -1.23733 | 2.110944 | 0.03619  | 0.142563 | -3.63386 |
| AC034102.6   | 0.620078 | 6.303481 | 2.110836 | 0.036199 | 0.142563 | -4.38986 |
| AP000223.1   | -1.04876 | 4.91617  | -2.11077 | 0.036205 | 0.142563 | -4.41222 |
| LINC02437    | -3.13395 | -0.6412  | -2.11018 | 0.036256 | 0.142689 | -3.70636 |
| AC125618.1   | -2.94291 | -0.06811 | -2.10962 | 0.036306 | 0.142809 | -3.7189  |
| LINC00974    | 3.207758 | 0.155863 | 2.108734 | 0.036383 | 0.143038 | -3.63853 |
| LINC01671    | 3.711242 | 3.534611 | 2.106627 | 0.036568 | 0.14369  | -3.66398 |
| AC004884.2   | 1.777899 | 6.562911 | 2.106394 | 0.036588 | 0.143695 | -4.12403 |

|            |          |          |          |          |          |          |
|------------|----------|----------|----------|----------|----------|----------|
| AL121987.2 | 0.515696 | 6.446722 | 2.105701 | 0.036649 | 0.143859 | -4.5023  |
| AC022898.1 | -2.62234 | 0.253221 | -2.10533 | 0.036682 | 0.143911 | -3.74352 |
| AC026310.2 | 3.980923 | 1.546021 | 2.104558 | 0.03675  | 0.144083 | -3.64792 |
| AC048382.1 | -1.13616 | 4.2782   | -2.1044  | 0.036764 | 0.144083 | -4.22236 |
| AL353801.3 | 2.915028 | 4.433432 | 2.102848 | 0.036901 | 0.144528 | -3.70438 |
| ZNF630-AS1 | -2.23218 | 1.930238 | -2.10269 | 0.036916 | 0.144528 | -3.89921 |
| MACORIS    | 4.355892 | 2.250899 | 2.101095 | 0.037057 | 0.144655 | -3.65637 |
| AC011270.2 | -2.76454 | -2.07468 | -2.10168 | 0.037005 | 0.144655 | -3.67037 |
| AC120498.6 | -3.29659 | -1.39598 | -2.10103 | 0.037063 | 0.144655 | -3.69748 |
| AC108463.3 | 1.966446 | 5.198126 | 2.101829 | 0.036992 | 0.144655 | -3.83851 |
| AC105219.4 | 1.336734 | 6.82803  | 2.10102  | 0.037064 | 0.144655 | -4.39086 |
| AL645568.1 | -0.44087 | 6.702831 | -2.1016  | 0.037012 | 0.144655 | -4.73888 |
| CU638689.5 | 3.45766  | -1.39821 | 2.100556 | 0.037105 | 0.144658 | -3.6509  |
| AC012645.2 | 3.132998 | 3.038352 | 2.100361 | 0.037123 | 0.144658 | -3.67517 |
| AC099494.3 | -1.00597 | 3.788842 | -2.10061 | 0.0371   | 0.144658 | -4.08887 |
| AL445228.2 | 2.02685  | 4.900636 | 2.099426 | 0.037206 | 0.144908 | -3.81335 |
| AC104564.2 | 4.061713 | 1.519638 | 2.097101 | 0.037414 | 0.145571 | -3.66027 |
| ALG13-AS1  | -0.53596 | 8.463826 | -2.09709 | 0.037415 | 0.145571 | -5.06105 |
| AC005863.1 | 3.626239 | -1.21587 | 2.096203 | 0.037494 | 0.14573  | -3.65807 |
| AC087273.2 | 3.882082 | 1.557771 | 2.096302 | 0.037486 | 0.14573  | -3.66261 |
| LINC00462  | 4.224776 | 3.072973 | 2.095099 | 0.037594 | 0.145823 | -3.67342 |
| LINC002481 | -0.66674 | 5.913603 | -2.09538 | 0.037568 | 0.145823 | -4.61382 |
| AC090587.1 | -0.53944 | 7.058733 | -2.09541 | 0.037566 | 0.145823 | -4.83635 |
| AC122688.3 | 0.494337 | 8.055935 | 2.095074 | 0.037596 | 0.145823 | -4.86162 |
| AL592435.2 | 3.708583 | 3.116232 | 2.093706 | 0.037719 | 0.146226 | -3.68122 |
| AC005828.5 | 3.998192 | -0.4284  | 2.092657 | 0.037814 | 0.146371 | -3.66405 |
| AC084824.3 | -0.42386 | 7.342142 | -2.09266 | 0.037814 | 0.146371 | -4.8816  |
| AC090589.3 | -0.3385  | 8.677442 | -2.09265 | 0.037815 | 0.146371 | -5.07468 |
| AL138962.1 | 4.449186 | 1.673557 | 2.092188 | 0.037857 | 0.146456 | -3.66784 |
| AC116552.1 | -0.82389 | 6.56277  | -2.0915  | 0.037919 | 0.14662  | -4.79347 |
| AL033527.3 | 1.972495 | 4.936612 | 2.091248 | 0.037942 | 0.146635 | -3.8154  |
| AL606534.1 | 1.628023 | 5.949193 | 2.090936 | 0.03797  | 0.146669 | -4.15218 |
| AC092368.3 | 0.611703 | 8.300968 | 2.090405 | 0.038019 | 0.14678  | -4.88829 |
| AC244034.3 | -1.13944 | 3.123489 | -2.09012 | 0.038044 | 0.146804 | -3.97061 |
| AC091173.1 | 3.129519 | -1.10045 | 2.089138 | 0.038134 | 0.147074 | -3.66963 |
| AC079385.3 | 3.567514 | -0.04128 | 2.088605 | 0.038183 | 0.147186 | -3.67094 |
| AC007336.1 | 0.809947 | 5.551959 | 2.088303 | 0.03821  | 0.147217 | -4.18613 |
| AC024270.2 | -1.44518 | 3.51685  | -2.08766 | 0.038269 | 0.147367 | -4.14576 |
| AC121320.1 | 3.081529 | 1.313557 | 2.086119 | 0.03841  | 0.147811 | -3.68228 |
| AC092436.4 | -1.32531 | 5.470619 | -2.08597 | 0.038423 | 0.147811 | -4.66454 |
| AC011511.2 | 3.381492 | 1.049824 | 2.085522 | 0.038465 | 0.147894 | -3.67986 |
| EGOT       | 2.634852 | 4.37556  | 2.08495  | 0.038517 | 0.148021 | -3.74943 |
| PARAL1     | 3.910183 | -0.16054 | 2.082446 | 0.038748 | 0.148801 | -3.68083 |
| AC011465.1 | 0.651227 | 8.293587 | 2.082319 | 0.03876  | 0.148801 | -4.90328 |
| USP12-AS2  | 4.428571 | 2.409348 | 2.081424 | 0.038843 | 0.148855 | -3.69015 |
| AC018878.1 | 3.720689 | 3.38811  | 2.080882 | 0.038893 | 0.148855 | -3.70809 |
| AC002550.1 | 1.887507 | 3.311207 | 2.080998 | 0.038882 | 0.148855 | -3.73753 |
| AC120114.1 | 0.701596 | 7.202647 | 2.081575 | 0.038829 | 0.148855 | -4.67494 |
| LINC01176  | 0.574567 | 9.145532 | 2.08116  | 0.038867 | 0.148855 | -5.04936 |
| LINC02604  | 0.457248 | 10.46718 | 2.081427 | 0.038842 | 0.148855 | -5.25745 |
| ATP2C2-AS1 | 0.912376 | 6.939456 | 2.08049  | 0.038929 | 0.148919 | -4.58183 |
| AL033519.3 | -3.04826 | -0.65873 | -2.07966 | 0.039007 | 0.148966 | -3.75327 |
| AC099518.2 | 2.596926 | 5.715868 | 2.079503 | 0.039021 | 0.148966 | -3.84733 |
| AC040904.1 | 2.200041 | 6.648904 | 2.079871 | 0.038987 | 0.148966 | -4.22063 |
| POLH-AS1   | 0.579776 | 7.93948  | 2.08014  | 0.038962 | 0.148966 | -4.85131 |
| AC126696.1 | 3.84879  | 1.52666  | 2.078661 | 0.039099 | 0.149189 | -3.69115 |
| TRPM2-AS   | 2.748889 | 7.822781 | 2.077736 | 0.039186 | 0.149442 | -4.2794  |
| AC239799.1 | 3.246602 | -0.33767 | 2.076883 | 0.039265 | 0.149518 | -3.68996 |

|              |          |          |          |          |          |          |
|--------------|----------|----------|----------|----------|----------|----------|
| AC087672.2   | 3.254896 | 3.18298  | 2.077301 | 0.039226 | 0.149518 | -3.71376 |
| AC004837.2   | 0.626624 | 7.072398 | 2.076904 | 0.039263 | 0.149518 | -4.68572 |
| AC004817.1   | 3.727741 | 0.101802 | 2.075969 | 0.039351 | 0.149768 | -3.69156 |
| AC139720.1   | 4.799863 | 2.738537 | 2.075663 | 0.03938  | 0.149802 | -3.69964 |
| AL592114.3   | -2.50231 | 2.468924 | -2.07519 | 0.039424 | 0.149894 | -4.02637 |
| AL157700.1   | -0.64203 | 6.497437 | -2.07475 | 0.039465 | 0.149975 | -4.80407 |
| AL513123.1   | 9.746606 | 5.735837 | 2.074314 | 0.039506 | 0.150055 | -3.69726 |
| AC112493.1   | 4.050961 | -0.93936 | 2.073321 | 0.039599 | 0.150334 | -3.69538 |
| AC002540.1   | 3.350624 | 1.413974 | 2.071312 | 0.039789 | 0.150977 | -3.70567 |
| AC011313.1   | 4.1068   | 0.177586 | 2.070572 | 0.039859 | 0.151167 | -3.70026 |
| AC100782.1   | 4.074585 | 2.450981 | 2.070105 | 0.039903 | 0.151258 | -3.71155 |
| AP000851.1   | 4.101571 | 1.523421 | 2.068901 | 0.040017 | 0.151614 | -3.70691 |
| LINC01703    | 0.895989 | 7.970738 | 2.06832  | 0.040073 | 0.151747 | -4.81854 |
| AC083841.2   | 4.471633 | 0.803582 | 2.067986 | 0.040105 | 0.151791 | -3.70479 |
| SLC25A5-AS1  | -0.3418  | 6.874769 | -2.06706 | 0.040193 | 0.152048 | -4.83221 |
| AC013391.1   | 3.846695 | 0.297105 | 2.065965 | 0.040297 | 0.152299 | -3.70793 |
| AC027031.2   | 1.203129 | 7.069384 | 2.065942 | 0.040299 | 0.152299 | -4.61082 |
| AL121827.2   | 2.133841 | 2.073505 | 2.065544 | 0.040338 | 0.152366 | -3.73186 |
| AC048337.1   | 3.692043 | 1.313823 | 2.065318 | 0.040359 | 0.152371 | -3.71313 |
| AL133153.2   | 3.317095 | 5.338118 | 2.064765 | 0.040412 | 0.152389 | -3.80367 |
| AC092135.1   | -0.6035  | 4.083954 | -2.06479 | 0.040409 | 0.152389 | -4.16132 |
| BX322562.1   | 0.913312 | 7.703742 | 2.064634 | 0.040425 | 0.152389 | -4.809   |
| AC108136.1   | 6.001724 | 3.4481   | 2.063741 | 0.04051  | 0.152635 | -3.71658 |
| AL139351.1   | 4.467529 | 0.124074 | 2.063104 | 0.040572 | 0.152789 | -3.71221 |
| AC024361.2   | -1.35052 | 3.333631 | -2.06258 | 0.040622 | 0.152837 | -4.1401  |
| AC011477.2   | -0.5513  | 8.940427 | -2.06255 | 0.040625 | 0.152837 | -5.20403 |
| CASC9        | 3.913178 | 9.472412 | 2.062011 | 0.040677 | 0.152955 | -4.5093  |
| AC010271.2   | 3.806666 | 0.433109 | 2.061583 | 0.040718 | 0.153003 | -3.71524 |
| AL354793.1   | 3.287401 | 4.030303 | 2.061455 | 0.04073  | 0.153003 | -3.75722 |
| DLX2-DT      | 4.157043 | 0.800137 | 2.061209 | 0.040754 | 0.153016 | -3.716   |
| AC106881.1   | -1.06468 | 3.065716 | -2.06092 | 0.040781 | 0.153043 | -4.04648 |
| SERPINB9P1   | 1.376579 | 7.302631 | 2.060559 | 0.040817 | 0.153099 | -4.551   |
| LINC02004    | -1.62151 | 4.572494 | -2.05915 | 0.040953 | 0.153534 | -4.54747 |
| LINC02584    | 3.887743 | 4.270399 | 2.058359 | 0.04103  | 0.153744 | -3.75555 |
| AL354714.1   | 2.873949 | 1.80594  | 2.058126 | 0.041052 | 0.153752 | -3.73391 |
| AC073592.8   | 3.951375 | 0.370044 | 2.056485 | 0.041212 | 0.154043 | -3.72322 |
| LINC02631    | 3.452692 | 1.244212 | 2.056997 | 0.041162 | 0.154043 | -3.72766 |
| ARHGAP31-AS1 | 1.54557  | 6.333037 | 2.056877 | 0.041174 | 0.154043 | -4.24305 |
| AL390728.6   | 0.470384 | 10.62134 | 2.056508 | 0.04121  | 0.154043 | -5.32795 |
| AL031118.1   | -0.78317 | 4.704256 | -2.0557  | 0.041289 | 0.1541   | -4.39548 |
| AC020612.3   | 0.589865 | 6.656562 | 2.055823 | 0.041277 | 0.1541   | -4.61825 |
| AC010542.5   | 0.603657 | 8.77377  | 2.055974 | 0.041262 | 0.1541   | -5.03856 |
| AC113194.1   | 4.126982 | -1.21963 | 2.054761 | 0.04138  | 0.154212 | -3.72523 |
| AC008498.2   | -1.40081 | 2.053526 | -2.05516 | 0.041341 | 0.154212 | -3.91088 |
| AC097359.2   | -0.49061 | 7.190586 | -2.05481 | 0.041376 | 0.154212 | -4.94398 |
| AC079145.1   | -1.18506 | 5.216799 | -2.0537  | 0.041484 | 0.15452  | -4.62714 |
| AL450384.2   | -0.46039 | 7.63033  | -2.05153 | 0.041697 | 0.155238 | -5.01411 |
| AL121987.1   | -2.11665 | 2.080609 | -2.04994 | 0.041854 | 0.155745 | -3.98291 |
| AL136131.2   | 4.28963  | -0.21857 | 2.048927 | 0.041954 | 0.155886 | -3.73489 |
| AC005920.2   | 4.187033 | 6.266046 | 2.049219 | 0.041925 | 0.155886 | -3.85164 |
| AC046158.1   | -0.96064 | 4.806401 | -2.04907 | 0.04194  | 0.155886 | -4.49836 |
| AC009063.3   | 3.755861 | -1.06655 | 2.047894 | 0.042056 | 0.156189 | -3.73628 |
| AC103702.2   | 3.060184 | 9.075748 | 2.047302 | 0.042115 | 0.15633  | -4.62485 |
| AC104794.3   | 3.965023 | 1.195665 | 2.047039 | 0.042141 | 0.156349 | -3.74118 |
| EXOC3-AS1    | 0.679506 | 8.437227 | 2.045638 | 0.042281 | 0.156789 | -4.99992 |
| AC073655.1   | 3.558252 | 3.61694  | 2.044061 | 0.042438 | 0.157271 | -3.77404 |
| TTLL11-IT1   | 3.011815 | 3.278679 | 2.043914 | 0.042452 | 0.157271 | -3.77483 |
| AC010595.1   | 5.49957  | 2.816476 | 2.043641 | 0.04248  | 0.157295 | -3.74868 |

|            |          |          |          |          |          |          |
|------------|----------|----------|----------|----------|----------|----------|
| AC090286.1 | 3.288678 | -1.62109 | 2.043162 | 0.042528 | 0.157395 | -3.74367 |
| AC024560.1 | 3.295284 | 2.798294 | 2.041011 | 0.042744 | 0.158115 | -3.76986 |
| AL355303.1 | 3.896914 | 1.199795 | 2.039842 | 0.042861 | 0.158394 | -3.75267 |
| EMC1-AS1   | -0.43157 | 7.394835 | -2.03985 | 0.042861 | 0.158394 | -4.99808 |
| AC026124.2 | 1.509271 | 6.433525 | 2.038211 | 0.043026 | 0.158924 | -4.24891 |
| AC009502.1 | 2.146693 | 2.281009 | 2.037156 | 0.043132 | 0.159084 | -3.78223 |
| AP000919.3 | -1.93345 | 2.888497 | -2.03718 | 0.04313  | 0.159084 | -4.12332 |
| AL137847.1 | -1.92257 | 3.747393 | -2.03729 | 0.043119 | 0.159084 | -4.29825 |
| AC105053.1 | -2.24455 | 0.415882 | -2.03685 | 0.043164 | 0.159121 | -3.84659 |
| C2orf27B   | -2.3205  | -0.18882 | -2.0365  | 0.043199 | 0.159174 | -3.82339 |
| LIMD1-AS1  | -1.31908 | 2.527551 | -2.03607 | 0.043242 | 0.159254 | -3.97063 |
| AL121820.2 | -1.6002  | 6.484992 | -2.03567 | 0.043283 | 0.159327 | -5.00429 |
| AC006141.1 | -0.46999 | 7.148229 | -2.0348  | 0.043372 | 0.159576 | -4.9678  |
| AC104823.1 | 3.693046 | 0.159039 | 2.034005 | 0.043453 | 0.159794 | -3.7592  |
| LINC02570  | 4.079829 | 1.944934 | 2.032955 | 0.04356  | 0.159953 | -3.76801 |
| LINC02014  | 5.182316 | 6.710944 | 2.033148 | 0.04354  | 0.159953 | -3.84437 |
| AP003392.5 | 1.673406 | 6.392958 | 2.033082 | 0.043547 | 0.159953 | -4.17996 |
| AC089983.1 | 4.099662 | 2.846695 | 2.031485 | 0.04371  | 0.160045 | -3.77793 |
| AC023855.1 | 3.246505 | 3.327158 | 2.032015 | 0.043656 | 0.160045 | -3.79548 |
| AL161457.1 | -2.9674  | -1.36904 | -2.0325  | 0.043607 | 0.160045 | -3.81174 |
| AC092040.1 | -1.57024 | 0.895417 | -2.03196 | 0.043661 | 0.160045 | -3.85396 |
| AC004623.1 | 0.481772 | 5.966336 | 2.031641 | 0.043694 | 0.160045 | -4.49405 |
| AC004865.2 | 0.663025 | 6.222815 | 2.03146  | 0.043713 | 0.160045 | -4.54017 |
| AL391069.3 | 3.782654 | 0.395965 | 2.029896 | 0.043873 | 0.160353 | -3.76602 |
| LINC01841  | 2.891234 | 2.54656  | 2.029953 | 0.043867 | 0.160353 | -3.79006 |
| LINC02544  | 4.179633 | 4.016023 | 2.029603 | 0.043903 | 0.160353 | -3.79536 |
| AL391425.1 | -0.98472 | 3.300673 | -2.03022 | 0.04384  | 0.160353 | -4.11455 |
| AC027682.1 | 0.653595 | 5.640328 | 2.029704 | 0.043893 | 0.160353 | -4.35027 |
| AC010999.2 | 2.668341 | 3.300887 | 2.028426 | 0.044024 | 0.160717 | -3.80944 |
| AL603750.1 | -0.69199 | 8.180641 | -2.02748 | 0.044122 | 0.160996 | -5.17327 |
| AC041040.1 | 2.279333 | 1.839328 | 2.02708  | 0.044163 | 0.161067 | -3.79028 |
| AC012150.1 | 3.655721 | -1.28931 | 2.026843 | 0.044188 | 0.161079 | -3.76973 |
| AP001160.3 | 0.508989 | 8.61564  | 2.026614 | 0.044212 | 0.161087 | -5.09046 |
| AL603910.1 | -0.81607 | 6.096149 | -2.02558 | 0.044318 | 0.161397 | -4.83957 |
| AL353693.1 | 5.161667 | 3.594924 | 2.023604 | 0.044524 | 0.162068 | -3.79115 |
| LINC01415  | 2.007902 | 4.829109 | 2.02283  | 0.044604 | 0.162282 | -3.9296  |
| AC012442.1 | 0.700185 | 6.924414 | 2.022349 | 0.044655 | 0.162386 | -4.69587 |
| AC011443.1 | -0.73505 | 6.551046 | -2.02198 | 0.044694 | 0.162449 | -4.9215  |
| AP003469.1 | 3.674719 | 0.511669 | 2.018968 | 0.045009 | 0.16351  | -3.78401 |
| AC005695.1 | -0.8175  | 4.090853 | -2.01877 | 0.045029 | 0.16351  | -4.31217 |
| AC020907.5 | 1.900841 | 2.779415 | 2.01714  | 0.045201 | 0.164055 | -3.83239 |
| AC005091.1 | 2.272711 | 3.193347 | 2.016643 | 0.045253 | 0.164166 | -3.83591 |
| AC141586.5 | -0.44675 | 5.128575 | -2.01553 | 0.04537  | 0.164512 | -4.49773 |
| RRM1-AS1   | 3.686498 | 3.57611  | 2.014485 | 0.045481 | 0.164799 | -3.82146 |
| AC009093.1 | 1.378807 | 5.74609  | 2.014371 | 0.045494 | 0.164799 | -4.17461 |
| UBR5-AS1   | 0.395916 | 9.388998 | 2.013367 | 0.0456   | 0.165105 | -5.2456  |
| AC130650.2 | 0.510838 | 6.493027 | 2.01232  | 0.045711 | 0.165428 | -4.68405 |
| AL391261.2 | -2.91497 | -1.56385 | -2.01156 | 0.045792 | 0.16548  | -3.83481 |
| AL356124.2 | -1.99153 | 3.200039 | -2.01178 | 0.045769 | 0.16548  | -4.20453 |
| AP001505.1 | 0.514642 | 8.857258 | 2.011673 | 0.04578  | 0.16548  | -5.15245 |
| AL592494.2 | 4.458692 | 3.525383 | 2.010964 | 0.045856 | 0.165632 | -3.81671 |
| LINC01932  | 6.402841 | 4.642374 | 2.010539 | 0.045901 | 0.165717 | -3.80922 |
| AL160408.5 | 4.491294 | 0.89548  | 2.010223 | 0.045935 | 0.165759 | -3.79721 |
| AC130456.4 | -2.60075 | 1.867391 | -2.00924 | 0.046041 | 0.166024 | -4.05117 |
| AP003086.1 | -0.72893 | 4.809965 | -2.00912 | 0.046053 | 0.166024 | -4.512   |
| AP001025.1 | 3.780792 | 2.911791 | 2.008659 | 0.046102 | 0.166083 | -3.81974 |
| AC067750.1 | -0.40806 | 6.032231 | -2.00856 | 0.046113 | 0.166083 | -4.77848 |
| AC040160.2 | -0.39412 | 5.59984  | -2.00828 | 0.046143 | 0.166111 | -4.66519 |

|            |          |          |          |          |          |          |
|------------|----------|----------|----------|----------|----------|----------|
| AP000439.3 | 3.168787 | -2.03208 | 2.006867 | 0.046295 | 0.166418 | -3.80098 |
| LINC02607  | 3.579368 | -0.54884 | 2.007228 | 0.046256 | 0.166418 | -3.801   |
| IDH1-AS1   | 0.737372 | 6.750546 | 2.006989 | 0.046282 | 0.166418 | -4.70091 |
| AC092422.1 | -2.53303 | 1.257415 | -2.00616 | 0.046371 | 0.166612 | -3.99054 |
| AC025918.1 | -1.23332 | 4.782404 | -2.0059  | 0.046399 | 0.166634 | -4.65101 |
| AP006259.1 | -1.42197 | 3.658609 | -2.00522 | 0.046472 | 0.166814 | -4.32678 |
| AL117336.1 | 0.639431 | 7.226948 | 2.004189 | 0.046584 | 0.167136 | -4.86748 |
| AGAP11     | -1.02458 | 3.217486 | -2.00362 | 0.046645 | 0.167277 | -4.18085 |
| AC006483.2 | 3.637241 | 1.900968 | 2.002957 | 0.046717 | 0.167455 | -3.8185  |
| AC010327.3 | 3.304666 | 1.012431 | 2.001918 | 0.04683  | 0.167705 | -3.81523 |
| AF127577.3 | 6.235877 | 5.168147 | 2.001822 | 0.04684  | 0.167705 | -3.83297 |
| LINC00596  | -2.77412 | -2.34706 | -2.0017  | 0.046854 | 0.167705 | -3.83617 |
| AL160408.4 | 3.932559 | 0.863636 | 2.000359 | 0.046999 | 0.167986 | -3.81382 |
| AC016397.2 | 2.510729 | 1.673069 | 2.000765 | 0.046955 | 0.167986 | -3.82939 |
| AC011611.3 | 3.49725  | 4.586282 | 2.00039  | 0.046996 | 0.167986 | -3.8842  |
| AC073964.1 | 5.590301 | 5.209088 | 1.998144 | 0.047241 | 0.16869  | -3.84956 |
| AL592071.1 | 3.681466 | 3.886253 | 1.998267 | 0.047228 | 0.16869  | -3.85243 |
| AL354710.2 | 3.512673 | 1.536319 | 1.997317 | 0.047332 | 0.168853 | -3.82529 |
| AC009902.3 | 1.012472 | 4.81268  | 1.997373 | 0.047326 | 0.168853 | -4.15137 |
| LINC01561  | 3.089361 | 1.932555 | 1.996261 | 0.047448 | 0.169186 | -3.83355 |
| AC092894.1 | 3.461634 | 0.849102 | 1.995323 | 0.047551 | 0.16929  | -3.82386 |
| AC087501.2 | -0.61158 | 5.798913 | -1.9956  | 0.04752  | 0.16929  | -4.77027 |
| AC008556.1 | 1.826657 | 8.300818 | 1.995198 | 0.047565 | 0.16929  | -4.90159 |
| AC093726.2 | -0.42636 | 6.884778 | -1.99518 | 0.047567 | 0.16929  | -4.98798 |
| LINC02234  | -2.48556 | 0.515802 | -1.99473 | 0.047616 | 0.169386 | -3.9421  |
| AL049776.1 | -0.4359  | 6.768022 | -1.99166 | 0.047955 | 0.170511 | -4.97794 |
| AL355601.1 | 4.425487 | 0.555346 | 1.990893 | 0.04804  | 0.170732 | -3.82721 |
| AC010486.3 | 4.17788  | -0.55609 | 1.990356 | 0.0481   | 0.170783 | -3.82735 |
| SMCR2      | 3.616083 | 1.730379 | 1.990363 | 0.048099 | 0.170783 | -3.83839 |
| LARGE-IT1  | -2.43175 | 1.426595 | -1.98982 | 0.04816  | 0.170915 | -4.02408 |
| LINC00524  | 4.418323 | 0.730061 | 1.989493 | 0.048196 | 0.170962 | -3.82958 |
| FP700111.1 | 2.672884 | -1.01375 | 1.988978 | 0.048253 | 0.171004 | -3.82954 |
| LINC01352  | -1.47531 | 2.925726 | -1.989   | 0.04825  | 0.171004 | -4.22051 |
| AL031705.1 | 1.807622 | 5.076747 | 1.988609 | 0.048295 | 0.171069 | -4.03542 |
| AC129926.1 | 4.207959 | 1.699608 | 1.987765 | 0.048389 | 0.171322 | -3.83723 |
| AF241728.1 | 2.304445 | 4.289228 | 1.985973 | 0.048589 | 0.171951 | -3.92831 |
| AL031009.1 | 0.460208 | 7.026029 | 1.984942 | 0.048705 | 0.172279 | -4.87685 |
| AL109804.1 | 2.708181 | 4.764483 | 1.982604 | 0.048968 | 0.173128 | -3.94771 |
| AC009142.1 | 3.57921  | -0.40784 | 1.982291 | 0.049003 | 0.173172 | -3.84007 |
| AP006621.3 | 0.506217 | 8.313139 | 1.981552 | 0.049087 | 0.173303 | -5.12736 |
| AC135050.5 | -0.34033 | 8.554561 | -1.98162 | 0.049079 | 0.173303 | -5.27556 |
| AL157400.3 | 1.798828 | 3.756119 | 1.979764 | 0.049289 | 0.17375  | -3.95291 |
| WASIR2     | 2.709643 | 4.873051 | 1.97962  | 0.049306 | 0.17375  | -3.96707 |
| AC027373.1 | 1.301032 | 6.189799 | 1.98015  | 0.049246 | 0.17375  | -4.46076 |
| TET2-AS1   | -0.84778 | 5.345497 | -1.97986 | 0.049279 | 0.17375  | -4.75932 |
| AC010624.1 | -1.56416 | 2.484726 | -1.97938 | 0.049333 | 0.173765 | -4.12212 |
| LINC01816  | 0.822853 | 8.05158  | 1.978966 | 0.04938  | 0.173848 | -5.02817 |
| LINC00994  | -2.45977 | -0.91541 | -1.97865 | 0.049415 | 0.173891 | -3.8949  |
| FOXC2-AS1  | 4.333735 | -0.4911  | 1.977187 | 0.049582 | 0.174316 | -3.84785 |
| AC067956.1 | 3.396991 | -0.62012 | 1.977194 | 0.049582 | 0.174316 | -3.84787 |
| LINC01910  | 2.636797 | 3.322609 | 1.976693 | 0.049639 | 0.174432 | -3.89483 |
| AL157400.4 | 2.46554  | 4.832249 | 1.976224 | 0.049692 | 0.174539 | -3.97677 |
| AC099494.1 | -0.66268 | 4.939188 | -1.97572 | 0.04975  | 0.174659 | -4.5915  |
| AC136475.5 | -1.11399 | 3.969064 | -1.97524 | 0.049805 | 0.174771 | -4.39785 |
| AC073370.1 | 3.883085 | 1.818882 | 1.974587 | 0.04988  | 0.174951 | -3.86072 |
| AC012317.2 | 3.243882 | -1.43724 | 1.973575 | 0.049996 | 0.175113 | -3.85303 |
| AC106799.1 | 4.291927 | 0.137388 | 1.973632 | 0.049989 | 0.175113 | -3.85372 |
| AL031719.1 | -0.66922 | 3.837962 | -1.97391 | 0.049958 | 0.175113 | -4.31026 |

|            |          |          |          |          |          |          |
|------------|----------|----------|----------|----------|----------|----------|
| TMCO1-AS1  | 1.057406 | 5.38333  | 1.973123 | 0.050048 | 0.175132 | -4.26265 |
| AL591848.4 | -0.84931 | 4.891239 | -1.9733  | 0.050027 | 0.175132 | -4.6254  |
| AC015845.1 | -0.83143 | 6.193444 | -1.9726  | 0.050108 | 0.175261 | -4.96796 |
| AL359710.1 | -0.96742 | 3.447625 | -1.97217 | 0.050158 | 0.175353 | -4.26084 |
| AC123768.4 | -2.61252 | 0.299516 | -1.97072 | 0.050325 | 0.175856 | -3.9766  |
| AL354707.2 | 3.744675 | -0.43894 | 1.969637 | 0.05045  | 0.17621  | -3.8596  |
| AC012447.1 | 2.326172 | 4.900154 | 1.969256 | 0.050494 | 0.176282 | -3.9911  |
| CYP4F26P   | 6.537924 | 4.838427 | 1.968795 | 0.050547 | 0.176338 | -3.87907 |
| AC012313.8 | 0.822534 | 5.180092 | 1.968713 | 0.050557 | 0.176338 | -4.28089 |
| LINC01449  | 3.316486 | -1.51386 | 1.968243 | 0.050611 | 0.176446 | -3.86123 |
| AC100839.2 | 4.158526 | 2.724488 | 1.967686 | 0.050676 | 0.17659  | -3.87991 |
| AC093159.1 | 3.894512 | 5.268955 | 1.966822 | 0.050776 | 0.176858 | -3.94723 |
| AL121652.1 | -1.02428 | 5.362447 | -1.96655 | 0.050808 | 0.176886 | -4.8432  |
| AL162574.2 | 4.315249 | 0.079321 | 1.964478 | 0.05105  | 0.177645 | -3.86779 |
| AL050344.1 | 3.349816 | -1.41752 | 1.963862 | 0.051122 | 0.177731 | -3.86801 |
| AC009093.4 | -1.63077 | 4.763099 | -1.96389 | 0.051118 | 0.177731 | -4.63874 |
| LINC02195  | 5.011899 | 6.420113 | 1.963528 | 0.051161 | 0.177784 | -3.95233 |
| AC011944.1 | 2.19154  | 3.2307   | 1.962626 | 0.051266 | 0.177905 | -3.93032 |
| AC007728.3 | 3.638415 | 4.641163 | 1.962656 | 0.051263 | 0.177905 | -3.93296 |
| AL807757.2 | 0.536969 | 7.322081 | 1.962963 | 0.051227 | 0.177905 | -4.96949 |
| AC105275.2 | 3.478684 | -1.33024 | 1.961999 | 0.05134  | 0.177996 | -3.87091 |
| NCKAP5-AS1 | -1.73395 | 2.187291 | -1.96202 | 0.051338 | 0.177996 | -4.13857 |
| AC121761.1 | 0.700829 | 8.260543 | 1.961446 | 0.051405 | 0.178139 | -5.13182 |
| DENND6A-DT | 2.12848  | 0.922635 | 1.960992 | 0.051458 | 0.178207 | -3.88791 |
| AC018690.1 | 0.379169 | 8.656876 | 1.960875 | 0.051472 | 0.178207 | -5.23849 |
| AC008806.1 | -2.01041 | 0.620983 | -1.96058 | 0.051507 | 0.178245 | -3.98565 |
| AC008915.1 | 0.931117 | 5.01482  | 1.9601   | 0.051563 | 0.178277 | -4.18877 |
| AL022238.3 | -0.45367 | 6.558402 | -1.96011 | 0.051562 | 0.178277 | -4.98981 |
| AC009120.2 | -0.36388 | 8.249168 | -1.95943 | 0.051642 | 0.178468 | -5.27866 |
| AP003559.1 | 2.05602  | 5.062258 | 1.959177 | 0.051672 | 0.178489 | -4.08136 |
| AC233723.2 | 0.610114 | 8.028246 | 1.958841 | 0.051712 | 0.178543 | -5.11716 |
| ACAP2-IT1  | 0.614637 | 7.891749 | 1.957905 | 0.051823 | 0.178844 | -5.08709 |
| AL391097.2 | -1.28312 | 6.22657  | -1.95716 | 0.051911 | 0.178984 | -5.07511 |
| AL162231.2 | -0.88209 | 7.25154  | -1.95722 | 0.051904 | 0.178984 | -5.18862 |
| FGF10-AS1  | -2.64954 | -1.95576 | -1.95637 | 0.052005 | 0.179144 | -3.91247 |
| CAMTA1-DT  | 1.023092 | 7.090101 | 1.956436 | 0.051997 | 0.179144 | -4.80933 |
| AC147067.1 | 1.232543 | 7.089496 | 1.955042 | 0.052162 | 0.179604 | -4.66939 |
| AC115618.1 | 0.469048 | 7.491226 | 1.954657 | 0.052208 | 0.179679 | -5.04064 |
| LINC01098  | 3.547462 | -1.22582 | 1.954009 | 0.052285 | 0.179744 | -3.88321 |
| AC125793.1 | 3.092509 | -2.01426 | 1.953695 | 0.052323 | 0.179744 | -3.88336 |
| AC092979.1 | -2.15436 | 0.843246 | -1.95387 | 0.052302 | 0.179744 | -4.01111 |
| AL359921.2 | 0.403953 | 8.868585 | 1.954087 | 0.052276 | 0.179744 | -5.28207 |
| MYCBP2-AS2 | -1.56537 | 3.026478 | -1.95054 | 0.052701 | 0.180877 | -4.36    |
| AL365181.3 | 1.68269  | 9.463201 | 1.950649 | 0.052687 | 0.180877 | -5.20095 |
| SACS-AS1   | -2.40626 | -0.65659 | -1.94998 | 0.052768 | 0.181024 | -3.95028 |
| KCNQ1OT1   | -0.61564 | 6.568423 | -1.94944 | 0.052832 | 0.181081 | -5.0421  |
| AC092574.1 | -0.80884 | 6.784636 | -1.94964 | 0.052809 | 0.181081 | -5.11432 |
| AF186192.3 | 2.831005 | 2.198442 | 1.948069 | 0.052998 | 0.181419 | -3.91882 |
| AC007601.2 | -0.9887  | 4.849354 | -1.94802 | 0.053003 | 0.181419 | -4.70583 |
| AC004830.1 | -0.9861  | 6.270388 | -1.94819 | 0.052983 | 0.181419 | -5.03931 |
| SREBF2-AS1 | 0.368864 | 8.604306 | 1.946807 | 0.05315  | 0.181838 | -5.2572  |
| AL355385.1 | 2.330962 | 6.08603  | 1.946568 | 0.053179 | 0.181854 | -4.17791 |
| AP001094.1 | -1.65415 | 3.955499 | -1.94612 | 0.053233 | 0.181955 | -4.57679 |
| AC023202.1 | 3.827054 | 0.542504 | 1.945722 | 0.053281 | 0.181956 | -3.8978  |
| AC022497.1 | -0.5845  | 5.010188 | -1.94581 | 0.053271 | 0.181956 | -4.63239 |
| LINC01585  | 1.637142 | 3.331527 | 1.944519 | 0.053427 | 0.182288 | -3.97865 |
| AC104964.3 | -1.18119 | 2.303647 | -1.94458 | 0.05342  | 0.182288 | -4.13039 |
| ZNF114-AS1 | 4.090182 | 1.516277 | 1.943358 | 0.053568 | 0.182592 | -3.90616 |

|            |          |          |          |          |          |          |
|------------|----------|----------|----------|----------|----------|----------|
| AC099518.6 | 1.140751 | 6.950747 | 1.94353  | 0.053547 | 0.182592 | -4.80594 |
| AC023906.5 | 0.627419 | 8.156215 | 1.943188 | 0.053589 | 0.182592 | -5.15553 |
| AC073288.2 | 3.097283 | 4.276611 | 1.941803 | 0.053758 | 0.183001 | -3.97557 |
| LINC01977  | 1.146676 | 5.85306  | 1.941955 | 0.053739 | 0.183001 | -4.44229 |
| AC083862.2 | 0.581134 | 7.278317 | 1.941363 | 0.053812 | 0.183101 | -4.98453 |
| AC015871.4 | -0.79554 | 4.088038 | -1.94044 | 0.053924 | 0.1834   | -4.39035 |
| AF129075.2 | 0.641427 | 5.429886 | 1.939726 | 0.054012 | 0.183611 | -4.47145 |
| AL049820.1 | -1.31952 | 3.811297 | -1.93954 | 0.054035 | 0.183611 | -4.50134 |
| AC138150.1 | -0.66953 | 5.885186 | -1.93827 | 0.054191 | 0.184057 | -4.91729 |
| AC022079.1 | 1.10334  | 6.353211 | 1.936614 | 0.054395 | 0.184666 | -4.61515 |
| AL135902.2 | -2.67188 | 0.582663 | -1.93554 | 0.054527 | 0.185015 | -4.06341 |
| AC005703.6 | 1.509727 | 5.102265 | 1.935381 | 0.054547 | 0.185015 | -4.19799 |
| AC007881.3 | 2.386492 | 4.230735 | 1.933896 | 0.05473  | 0.185555 | -4.04283 |
| LINC02242  | 4.09519  | 0.550127 | 1.932897 | 0.054854 | 0.185807 | -3.91674 |
| LSAMP-AS1  | 5.337788 | 5.160041 | 1.932965 | 0.054846 | 0.185807 | -3.95715 |
| AC118755.1 | 5.004831 | 6.121386 | 1.932276 | 0.054932 | 0.185974 | -3.99114 |
| AC087071.2 | 1.434117 | 6.14412  | 1.932102 | 0.054953 | 0.185974 | -4.46111 |
| AP005131.2 | 3.541225 | 4.170428 | 1.931221 | 0.055063 | 0.186262 | -3.97284 |
| AC026894.1 | -0.527   | 5.340248 | -1.92986 | 0.055232 | 0.18675  | -4.75699 |
| AL161658.1 | -2.80001 | -2.25718 | -1.92952 | 0.055275 | 0.186811 | -3.95287 |
| AC002347.1 | -1.05623 | 4.637278 | -1.92907 | 0.055331 | 0.186918 | -4.70692 |
| AL008721.2 | -0.40371 | 6.804307 | -1.92777 | 0.055493 | 0.187381 | -5.10738 |
| AC073333.1 | 0.535996 | 7.516765 | 1.926702 | 0.055628 | 0.187751 | -5.09076 |
| COL4A2-AS2 | 2.435478 | 2.676384 | 1.926033 | 0.055712 | 0.18795  | -3.96633 |
| AC027338.2 | 3.655791 | -1.25779 | 1.925348 | 0.055798 | 0.188157 | -3.92677 |
| AC078864.1 | -2.90993 | -0.66509 | -1.92491 | 0.055854 | 0.188259 | -4.02757 |
| AC016586.1 | -0.51917 | 7.210479 | -1.92375 | 0.056    | 0.188636 | -5.20487 |
| AP001893.1 | -0.54166 | 7.255779 | -1.92362 | 0.056016 | 0.188636 | -5.21196 |
| AC026367.3 | -0.53946 | 7.318832 | -1.92336 | 0.05605  | 0.188666 | -5.23153 |
| AC122694.1 | 3.921625 | 0.026562 | 1.92295  | 0.056101 | 0.188754 | -3.93125 |
| HIF1A-AS1  | 3.049469 | 3.708128 | 1.921863 | 0.056239 | 0.189132 | -3.98742 |
| AC114939.1 | -0.61746 | 6.064183 | -1.92076 | 0.056379 | 0.189518 | -4.9917  |
| DOCK4-AS1  | 2.182615 | 1.909715 | 1.919713 | 0.056512 | 0.189881 | -3.96643 |
| AC105219.2 | 5.811182 | 6.73712  | 1.919316 | 0.056562 | 0.189966 | -4.01538 |
| AC026474.1 | -1.05922 | 5.161684 | -1.91877 | 0.056632 | 0.190113 | -4.86145 |
| AC009075.1 | 3.659655 | 3.805925 | 1.918519 | 0.056664 | 0.190138 | -3.98013 |
| AC023389.1 | -0.47016 | 8.093564 | -1.91829 | 0.056693 | 0.190149 | -5.33663 |
| AC009086.3 | 0.399944 | 6.962908 | 1.917938 | 0.056738 | 0.190216 | -4.99967 |
| AP007216.2 | 4.099457 | 0.76809  | 1.917446 | 0.056801 | 0.190257 | -3.94069 |
| AC005330.1 | 2.576273 | 4.734891 | 1.917623 | 0.056779 | 0.190257 | -4.05758 |
| AL121658.1 | 0.618628 | 6.406515 | 1.913945 | 0.05725  | 0.191676 | -4.78815 |
| AC004466.2 | -0.90744 | 5.071354 | -1.91279 | 0.057399 | 0.192089 | -4.83348 |
| AC006262.2 | 4.029242 | 1.245705 | 1.912217 | 0.057473 | 0.19225  | -3.95189 |
| AL132796.2 | 3.009338 | -1.66707 | 1.911272 | 0.057595 | 0.192573 | -3.94773 |
| AL096816.1 | -1.23586 | 3.507222 | -1.91062 | 0.05768  | 0.192769 | -4.40695 |
| AC004854.2 | 0.497304 | 7.870605 | 1.910315 | 0.057719 | 0.192769 | -5.19843 |
| AL139246.3 | -1.4215  | 6.40426  | -1.91022 | 0.057731 | 0.192769 | -5.21111 |
| AC011337.1 | 1.368773 | 6.522269 | 1.909208 | 0.057863 | 0.193124 | -4.71259 |
| AC010969.2 | 0.392192 | 8.632366 | 1.908837 | 0.057911 | 0.193199 | -5.33377 |
| AC107993.1 | 0.53633  | 7.009298 | 1.906329 | 0.058237 | 0.194202 | -5.01466 |
| LINC02533  | 3.072236 | 3.252884 | 1.904413 | 0.058488 | 0.194878 | -4.00189 |
| AC005261.3 | 0.319385 | 9.757719 | 1.904383 | 0.058492 | 0.194878 | -5.52103 |
| AC022532.1 | 0.707726 | 6.326114 | 1.903764 | 0.058573 | 0.195062 | -4.83103 |
| AL162253.1 | -1.53749 | 2.790926 | -1.90292 | 0.058683 | 0.195256 | -4.34424 |
| AP000866.5 | -1.44481 | 5.21705  | -1.90308 | 0.058663 | 0.195256 | -4.96968 |
| AC048341.2 | 0.48814  | 8.793957 | 1.902458 | 0.058745 | 0.195373 | -5.35733 |
| AC110769.2 | 0.687269 | 5.446677 | 1.901101 | 0.058923 | 0.195881 | -4.5025  |
| AL354919.2 | 3.841961 | 4.207789 | 1.900088 | 0.059057 | 0.196152 | -4.01592 |

|            |          |          |          |          |          |          |
|------------|----------|----------|----------|----------|----------|----------|
| AC080038.4 | 0.944367 | 6.238182 | 1.900121 | 0.059053 | 0.196152 | -4.75153 |
| AC009495.2 | -1.66528 | 3.390244 | -1.89984 | 0.05909  | 0.196176 | -4.43929 |
| LINC02444  | 3.391727 | -1.28064 | 1.89947  | 0.059139 | 0.196194 | -3.96556 |
| AC095055.1 | -0.41006 | 6.839617 | -1.8994  | 0.059148 | 0.196194 | -5.16904 |
| AC090912.2 | 1.536655 | 5.105454 | 1.898462 | 0.059272 | 0.196519 | -4.24839 |
| AC007036.1 | -0.87814 | 5.583461 | -1.89792 | 0.059344 | 0.19667  | -4.92541 |
| AL512444.1 | 4.176384 | 2.286771 | 1.897623 | 0.059383 | 0.196714 | -3.98394 |
| AL589765.7 | -2.44038 | 0.555559 | -1.89705 | 0.059459 | 0.196877 | -4.11725 |
| AC012494.1 | 3.73704  | -0.79791 | 1.895772 | 0.059629 | 0.197181 | -3.97132 |
| AC079921.1 | 0.728911 | 6.225461 | 1.895889 | 0.059614 | 0.197181 | -4.74452 |
| AC016542.2 | -0.7729  | 7.550328 | -1.89594 | 0.059607 | 0.197181 | -5.33575 |
| AC073115.2 | 3.467033 | -1.49312 | 1.895273 | 0.059696 | 0.197314 | -3.9717  |
| AC073073.2 | 0.429882 | 7.672081 | 1.89389  | 0.059881 | 0.197837 | -5.19555 |
| AC022098.3 | 2.853231 | 4.184052 | 1.893103 | 0.059986 | 0.198098 | -4.05949 |
| AL138762.1 | 0.555812 | 5.477516 | 1.892256 | 0.060099 | 0.198385 | -4.63027 |
| AC073592.3 | 1.675228 | 3.663482 | 1.891521 | 0.060198 | 0.198624 | -4.08601 |
| AL157902.2 | -0.53466 | 4.129436 | -1.89114 | 0.060249 | 0.198705 | -4.45466 |
| LINC01516  | 2.908121 | -1.02919 | 1.890873 | 0.060285 | 0.198736 | -3.97864 |
| AP005137.1 | -2.48178 | 1.131284 | -1.89011 | 0.060387 | 0.198898 | -4.16843 |
| AC013731.1 | 0.622427 | 6.570226 | 1.89026  | 0.060367 | 0.198898 | -4.86339 |
| AC009088.1 | -0.84398 | 4.862763 | -1.88973 | 0.060438 | 0.19898  | -4.77766 |
| AC069503.1 | 3.492895 | 0.806922 | 1.888679 | 0.06058  | 0.199099 | -3.98683 |
| AL512363.1 | 4.887713 | 7.57799  | 1.888986 | 0.060539 | 0.199099 | -4.17418 |
| AC011503.2 | -1.10057 | 5.392572 | -1.88921 | 0.060509 | 0.199099 | -4.96602 |
| AC084782.3 | -1.08423 | 5.418769 | -1.88885 | 0.060557 | 0.199099 | -5.0064  |
| SMILR      | 5.913286 | 3.626899 | 1.888144 | 0.060652 | 0.199139 | -3.99529 |
| LINC02033  | 2.195793 | 2.741371 | 1.887999 | 0.060672 | 0.199139 | -4.03225 |
| AC025031.3 | 3.151987 | 5.481736 | 1.888089 | 0.06066  | 0.199139 | -4.17123 |
| LINC00556  | 3.775577 | 0.787062 | 1.886612 | 0.06086  | 0.199668 | -3.98849 |
| AC007996.1 | 0.643698 | 8.787544 | 1.886235 | 0.060911 | 0.199748 | -5.36367 |
| AC016526.2 | 1.499917 | 6.150128 | 1.884418 | 0.061157 | 0.200327 | -4.51349 |
| AP000753.2 | -0.82438 | 5.831955 | -1.88415 | 0.061194 | 0.200327 | -5.04585 |
| AL353763.2 | 0.423513 | 8.76164  | 1.884651 | 0.061126 | 0.200327 | -5.39172 |
| AC108673.3 | -0.41486 | 8.352432 | -1.88418 | 0.06119  | 0.200327 | -5.44183 |
| AC091982.1 | -0.7422  | 5.952461 | -1.88394 | 0.061223 | 0.200334 | -5.04364 |
| AC080129.1 | 4.100485 | -0.4218  | 1.883339 | 0.061304 | 0.200514 | -3.98998 |
| RUNX2-AS1  | 2.925416 | -1.02335 | 1.882821 | 0.061375 | 0.200544 | -3.99057 |
| AC005332.1 | 0.533447 | 5.730845 | 1.882687 | 0.061393 | 0.200544 | -4.69973 |
| AL132656.2 | -0.4491  | 6.403371 | -1.88268 | 0.061394 | 0.200544 | -5.11126 |
| LINC00920  | 1.343074 | 6.707857 | 1.882377 | 0.061436 | 0.200594 | -4.75225 |
| SATB2-AS1  | 1.177004 | 3.399107 | 1.881603 | 0.061541 | 0.200852 | -4.11841 |
| LINC00167  | 1.89747  | 3.029901 | 1.881373 | 0.061573 | 0.200867 | -4.05997 |
| AC092701.1 | 2.903094 | -1.1389  | 1.880512 | 0.061691 | 0.200949 | -3.99388 |
| AP003721.2 | 3.678314 | 1.472834 | 1.880678 | 0.061668 | 0.200949 | -4.00439 |
| AC005786.4 | 2.998616 | 1.540777 | 1.880407 | 0.061705 | 0.200949 | -4.01186 |
| AC015909.5 | -0.39893 | 6.244379 | -1.88074 | 0.061659 | 0.200949 | -5.05962 |
| AL590385.2 | 3.512491 | -0.12737 | 1.880169 | 0.061738 | 0.200968 | -3.99521 |
| AC069431.1 | -1.68156 | 1.712306 | -1.87966 | 0.061807 | 0.201107 | -4.19419 |
| AC022417.1 | -0.44493 | 5.837612 | -1.87787 | 0.062053 | 0.20182  | -4.96366 |
| AC092794.1 | -0.63319 | 7.192832 | -1.87713 | 0.062156 | 0.202068 | -5.30462 |
| AC104462.2 | 3.826913 | 0.318042 | 1.876027 | 0.062308 | 0.202473 | -4.00196 |
| AC011825.4 | 3.311601 | 1.952226 | 1.874966 | 0.062454 | 0.202774 | -4.02344 |
| AC107375.1 | 0.341604 | 8.205089 | 1.875021 | 0.062447 | 0.202774 | -5.33764 |
| AC007952.9 | 3.877731 | -0.55552 | 1.873604 | 0.062643 | 0.203187 | -4.00426 |
| AC067863.2 | 4.480571 | 1.705802 | 1.87337  | 0.062676 | 0.203187 | -4.01093 |
| AC100791.3 | 2.669884 | 4.859827 | 1.873539 | 0.062652 | 0.203187 | -4.15718 |
| AC027702.1 | 0.927435 | 6.749427 | 1.87327  | 0.06269  | 0.203187 | -4.8652  |
| AC000124.1 | -2.66375 | -1.26908 | -1.87203 | 0.062862 | 0.203658 | -4.05894 |



|            |          |          |          |          |          |          |
|------------|----------|----------|----------|----------|----------|----------|
| AC008083.3 | 3.492269 | -1.09915 | 1.871257 | 0.062969 | 0.203763 | -4.0074  |
| AC005912.2 | 1.694723 | 2.086685 | 1.871211 | 0.062976 | 0.203763 | -4.05384 |
| AC009318.3 | -0.42267 | 7.467011 | -1.87125 | 0.062971 | 0.203763 | -5.32563 |
| AC078795.1 | 0.456081 | 6.290762 | 1.87089  | 0.063021 | 0.20382  | -4.90363 |
| AC017006.2 | -0.77004 | 5.328695 | -1.87037 | 0.063093 | 0.203878 | -4.94168 |
| AC032044.2 | 0.479438 | 7.850564 | 1.870433 | 0.063084 | 0.203878 | -5.25411 |
| CXXC4-AS1  | 2.601595 | -0.63671 | 1.870073 | 0.063135 | 0.203926 | -4.01045 |
| AC096642.1 | 0.710146 | 5.151101 | 1.869864 | 0.063164 | 0.203932 | -4.50678 |
| AL022476.1 | -0.48936 | 4.449513 | -1.86802 | 0.063422 | 0.204677 | -4.55649 |
| LINC02637  | 0.823857 | 6.827593 | 1.867743 | 0.063461 | 0.204715 | -4.99821 |
| AL671710.1 | 0.333037 | 6.394149 | 1.867503 | 0.063495 | 0.204736 | -4.96232 |
| LINC01521  | 0.649048 | 7.198207 | 1.867302 | 0.063523 | 0.204739 | -5.10607 |
| AL392089.1 | -2.44413 | 0.616791 | -1.86693 | 0.063574 | 0.204817 | -4.18404 |
| AC121493.1 | -1.10663 | 5.330555 | -1.86612 | 0.063688 | 0.205009 | -5.01711 |
| SOX21-AS1  | -1.4927  | 7.353196 | -1.86631 | 0.063662 | 0.205009 | -5.46107 |
| AC006538.1 | 0.857873 | 5.630101 | 1.865906 | 0.063719 | 0.205019 | -4.60554 |
| AC090206.1 | -2.36308 | 0.029027 | -1.86546 | 0.063781 | 0.205022 | -4.10916 |
| AP003696.1 | 2.470808 | 4.928411 | 1.865318 | 0.063802 | 0.205022 | -4.17289 |
| AC011445.2 | 1.047962 | 7.868021 | 1.865609 | 0.063761 | 0.205022 | -5.18297 |
| AC137723.1 | -2.39454 | 1.077008 | -1.86481 | 0.063874 | 0.205091 | -4.20034 |
| AL135999.3 | -2.65981 | 1.252566 | -1.86478 | 0.063878 | 0.205091 | -4.22838 |
| AL390728.5 | 2.980585 | 1.306118 | 1.862782 | 0.06416  | 0.205909 | -4.03551 |
| AL365356.3 | 4.977061 | 3.311107 | 1.862464 | 0.064205 | 0.205966 | -4.0404  |
| AL391845.1 | 3.30339  | 2.0463   | 1.861759 | 0.064305 | 0.206022 | -4.0439  |
| AC044781.1 | 3.420714 | 2.258036 | 1.861952 | 0.064277 | 0.206022 | -4.04537 |
| AC016735.1 | -1.97376 | 5.83916  | -1.86186 | 0.06429  | 0.206022 | -5.26489 |
| AC078860.1 | 3.794876 | 1.643068 | 1.860543 | 0.064477 | 0.206487 | -4.03472 |
| AC087749.2 | 1.921565 | 5.819927 | 1.859974 | 0.064558 | 0.206658 | -4.35916 |
| AF186192.1 | -2.68465 | 0.092017 | -1.85868 | 0.064742 | 0.207158 | -4.14034 |
| AL662890.1 | 3.170108 | 3.8799   | 1.857074 | 0.064972 | 0.207806 | -4.08991 |
| AP003392.4 | 0.576099 | 7.80334  | 1.85683  | 0.065007 | 0.207829 | -5.2574  |
| AC005593.1 | 3.188248 | 1.697214 | 1.855494 | 0.065198 | 0.208352 | -4.04985 |
| LINC02172  | 2.505434 | 0.208713 | 1.854589 | 0.065328 | 0.208413 | -4.04037 |
| LINC00304  | -1.17307 | 1.885514 | -1.85489 | 0.065286 | 0.208413 | -4.21416 |
| AF230666.1 | 0.398428 | 6.022525 | 1.854852 | 0.065291 | 0.208413 | -4.88243 |
| DCST1-AS1  | 0.592596 | 8.244105 | 1.854716 | 0.06531  | 0.208413 | -5.33943 |
| AC100812.1 | 3.165442 | 3.246142 | 1.853639 | 0.065465 | 0.208535 | -4.07901 |
| AL162724.1 | -1.12169 | 5.947506 | -1.85378 | 0.065444 | 0.208535 | -5.17749 |
| AC004477.3 | 0.421939 | 8.364316 | 1.85376  | 0.065448 | 0.208535 | -5.38023 |
| AC127024.5 | 0.397024 | 9.324033 | 1.853552 | 0.065478 | 0.208535 | -5.53698 |
| AC100843.1 | 4.156654 | 1.246296 | 1.853201 | 0.065528 | 0.208607 | -4.03921 |
| AC131097.4 | -1.27985 | 3.932798 | -1.85257 | 0.065619 | 0.208776 | -4.70111 |
| AC012513.3 | -0.54817 | 7.447088 | -1.85245 | 0.065637 | 0.208776 | -5.37759 |
| MIS18A-AS1 | 2.03915  | 5.551203 | 1.848578 | 0.066197 | 0.210469 | -4.31801 |
| AP000785.2 | 4.695572 | 4.009727 | 1.846682 | 0.066473 | 0.21114  | -4.08047 |
| AC010266.2 | -2.48158 | -1.84831 | -1.84636 | 0.06652  | 0.21114  | -4.08484 |
| AL096678.1 | 1.491626 | 5.405778 | 1.846712 | 0.066468 | 0.21114  | -4.42766 |
| AC010320.3 | -0.44213 | 7.448095 | -1.84637 | 0.066519 | 0.21114  | -5.3743  |
| AL590560.3 | 3.081355 | 3.45013  | 1.846067 | 0.066562 | 0.211184 | -4.09901 |
| AC010320.1 | 2.230629 | 3.567216 | 1.845693 | 0.066617 | 0.211268 | -4.13505 |
| AC008609.1 | 2.566955 | 0.218656 | 1.844392 | 0.066807 | 0.211693 | -4.05446 |
| LINC01344  | -1.88507 | 1.026474 | -1.84452 | 0.066788 | 0.211693 | -4.19473 |
| CLYBL-AS1  | -2.51815 | -0.13351 | -1.84402 | 0.066862 | 0.211775 | -4.1526  |
| SMAD9-IT1  | -1.6695  | 3.155447 | -1.84185 | 0.06718  | 0.212693 | -4.53508 |
| AC005304.1 | -2.89318 | -1.36404 | -1.84114 | 0.067285 | 0.212937 | -4.11624 |
| AC008610.1 | 0.605456 | 7.877481 | 1.84081  | 0.067333 | 0.213    | -5.28633 |
| AC024451.4 | 0.558331 | 6.724158 | 1.840412 | 0.067392 | 0.213097 | -5.0355  |
| AC023908.3 | 0.500691 | 5.661478 | 1.840086 | 0.06744  | 0.213159 | -4.73282 |

|            |          |          |          |          |          |          |
|------------|----------|----------|----------|----------|----------|----------|
| AC234775.3 | -0.89756 | 6.329889 | -1.83903 | 0.067597 | 0.213564 | -5.25357 |
| PACERR     | 3.044491 | 3.796144 | 1.838415 | 0.067687 | 0.21362  | -4.11916 |
| AL445649.1 | -2.31418 | 0.865179 | -1.83833 | 0.0677   | 0.21362  | -4.25542 |
| HECW2-AS1  | 1.037105 | 6.02992  | 1.83871  | 0.067643 | 0.21362  | -4.70953 |
| AC016708.1 | 0.763982 | 6.066279 | 1.837978 | 0.067752 | 0.213694 | -4.79602 |
| AC130686.1 | 1.904086 | 4.092013 | 1.837651 | 0.0678   | 0.213757 | -4.18689 |
| AC024592.1 | 3.116681 | 3.178294 | 1.837272 | 0.067856 | 0.213845 | -4.10491 |
| AC009055.2 | 3.056754 | -0.84719 | 1.836839 | 0.067921 | 0.213901 | -4.05789 |
| AL008635.1 | -1.02974 | 4.830433 | -1.83677 | 0.067931 | 0.213901 | -4.86888 |
| AC091181.1 | 1.314781 | 4.603847 | 1.835627 | 0.068101 | 0.214313 | -4.27191 |
| AL356215.1 | 2.199719 | 5.62132  | 1.835504 | 0.068119 | 0.214313 | -4.35729 |
| FOXN3-AS2  | -2.02459 | 1.195999 | -1.83498 | 0.068197 | 0.214469 | -4.22776 |
| AC105446.1 | 1.714441 | 8.221699 | 1.834343 | 0.068292 | 0.214677 | -5.07214 |
| AC009118.2 | 2.458614 | 6.115166 | 1.831962 | 0.068648 | 0.215705 | -4.41979 |
| AC011297.1 | -2.36089 | 0.893493 | -1.83168 | 0.06869  | 0.215749 | -4.28598 |
| AC138430.1 | 2.21882  | -1.09308 | 1.831216 | 0.06876  | 0.215786 | -4.06648 |
| AL442067.1 | 0.558535 | 7.160952 | 1.831246 | 0.068755 | 0.215786 | -5.17291 |
| AL109947.1 | -2.75973 | -0.28327 | -1.8306  | 0.068852 | 0.215987 | -4.16956 |
| AC023302.1 | 1.934051 | 5.357562 | 1.830345 | 0.06889  | 0.216015 | -4.37826 |
| AC068722.1 | 3.052379 | -0.81888 | 1.827114 | 0.069377 | 0.217261 | -4.07194 |
| AC005162.2 | 3.917485 | 2.557668 | 1.826749 | 0.069432 | 0.217261 | -4.09761 |
| AC091057.2 | -0.68967 | 4.359511 | -1.82747 | 0.069323 | 0.217261 | -4.68728 |
| AC007598.2 | -0.98436 | 4.524178 | -1.82687 | 0.069414 | 0.217261 | -4.83511 |
| AC018628.1 | 0.36103  | 8.01622  | 1.826835 | 0.069419 | 0.217261 | -5.38892 |
| AC018781.1 | 2.955454 | 3.285206 | 1.82596  | 0.069551 | 0.217453 | -4.12526 |
| AP001350.2 | 0.609364 | 6.335956 | 1.826118 | 0.069527 | 0.217453 | -4.96744 |
| LINC01983  | 3.491133 | 2.312273 | 1.82559  | 0.069607 | 0.217537 | -4.10125 |
| AC234772.2 | 1.66266  | 5.955653 | 1.825161 | 0.069672 | 0.217599 | -4.50185 |
| AC009506.1 | -0.38732 | 8.509155 | -1.82508 | 0.069685 | 0.217599 | -5.56833 |
| AC004943.3 | 2.751777 | 3.344741 | 1.824502 | 0.069772 | 0.217752 | -4.13607 |
| AL133551.1 | 0.969523 | 4.385234 | 1.823991 | 0.06985  | 0.217752 | -4.32385 |
| AC046143.2 | 0.579534 | 8.167436 | 1.82402  | 0.069845 | 0.217752 | -5.3789  |
| PRKAG2-AS1 | -0.72849 | 8.01919  | -1.82413 | 0.069828 | 0.217752 | -5.53932 |
| AC006372.1 | 3.611998 | -1.12589 | 1.822298 | 0.070107 | 0.218374 | -4.07842 |
| AC093249.2 | 1.347058 | 5.804116 | 1.822404 | 0.070091 | 0.218374 | -4.5793  |
| LINC01342  | -1.94982 | 3.716864 | -1.82204 | 0.070147 | 0.218407 | -4.62569 |
| AC017002.2 | 3.176138 | 0.560745 | 1.821449 | 0.070237 | 0.218596 | -4.08624 |
| Z94160.1   | 2.928105 | -1.78816 | 1.819928 | 0.070469 | 0.219047 | -4.08139 |
| AC004053.1 | 3.63615  | 0.485469 | 1.820045 | 0.070451 | 0.219047 | -4.08447 |
| AC008946.1 | 0.639324 | 7.151764 | 1.820161 | 0.070434 | 0.219047 | -5.17288 |
| AC026523.2 | 1.924153 | 0.531468 | 1.81913  | 0.070592 | 0.219151 | -4.10207 |
| AC145343.1 | 2.16752  | 5.783714 | 1.818946 | 0.07062  | 0.219151 | -4.35052 |
| AL049569.1 | 1.096934 | 5.231225 | 1.819201 | 0.070581 | 0.219151 | -4.49887 |
| AC105760.2 | 0.514785 | 6.018323 | 1.819353 | 0.070557 | 0.219151 | -4.89722 |
| AL358472.3 | 0.398011 | 7.826824 | 1.81875  | 0.07065  | 0.219155 | -5.36314 |
| AC092535.1 | -1.77153 | 1.315593 | -1.81728 | 0.070876 | 0.219765 | -4.26529 |
| LINC00866  | 3.753459 | 2.412479 | 1.816574 | 0.070984 | 0.22001  | -4.10997 |
| AC112907.1 | 3.432879 | 0.802149 | 1.815788 | 0.071105 | 0.220294 | -4.09461 |
| TGFA-IT1   | 3.448315 | -0.22607 | 1.814592 | 0.07129  | 0.220775 | -4.09045 |
| AC003986.2 | 2.509414 | 2.220274 | 1.813801 | 0.071412 | 0.221063 | -4.13082 |
| MLIP-IT1   | 4.263559 | 3.184331 | 1.813483 | 0.071461 | 0.221124 | -4.11954 |
| AP001793.1 | 0.492619 | 6.73205  | 1.813078 | 0.071524 | 0.221227 | -5.11693 |
| AC020917.2 | 3.045286 | 3.047202 | 1.812622 | 0.071595 | 0.221354 | -4.14112 |
| LINC01993  | 1.281443 | 3.058984 | 1.812142 | 0.071669 | 0.221493 | -4.19543 |
| AC011483.3 | 3.694546 | 0.469952 | 1.811874 | 0.071711 | 0.22153  | -4.0962  |
| AC004466.1 | 0.531294 | 5.557457 | 1.810444 | 0.071933 | 0.222126 | -4.77869 |
| AL121992.2 | 3.589043 | -0.77848 | 1.810109 | 0.071985 | 0.222196 | -4.09604 |
| AL161733.1 | 3.647394 | -0.58049 | 1.809208 | 0.072125 | 0.222537 | -4.09751 |

|            |          |          |          |          |          |          |
|------------|----------|----------|----------|----------|----------|----------|
| AL136298.1 | 3.237316 | -0.70803 | 1.80837  | 0.072256 | 0.22266  | -4.09879 |
| DSCAS      | 2.611763 | 3.89595  | 1.808612 | 0.072219 | 0.22266  | -4.19013 |
| SIAH2-AS1  | 0.555949 | 7.665694 | 1.8085   | 0.072236 | 0.22266  | -5.33    |
| AL353796.1 | 0.389815 | 7.807368 | 1.808195 | 0.072284 | 0.22266  | -5.38025 |
| AC113361.1 | 3.290237 | -0.50313 | 1.807159 | 0.072446 | 0.222896 | -4.10077 |
| BX546450.2 | 3.368428 | -0.3203  | 1.806638 | 0.072527 | 0.222896 | -4.10174 |
| AP001208.2 | 3.714437 | -0.50904 | 1.806258 | 0.072587 | 0.222896 | -4.10174 |
| AC008456.1 | 3.564518 | 0.828414 | 1.806277 | 0.072584 | 0.222896 | -4.1075  |
| AC025164.1 | 0.932978 | 3.838138 | 1.806189 | 0.072598 | 0.222896 | -4.30706 |
| AC068580.3 | 0.465645 | 7.785163 | 1.807019 | 0.072468 | 0.222896 | -5.35973 |
| DNAJC3-DT  | 0.484197 | 8.119179 | 1.806624 | 0.07253  | 0.222896 | -5.4223  |
| AC073896.3 | -0.43891 | 7.919361 | -1.80735 | 0.072416 | 0.222896 | -5.51508 |
| AC055736.1 | 4.13136  | -0.17187 | 1.805393 | 0.072723 | 0.223097 | -4.10318 |
| AL031666.2 | -0.4252  | 6.077443 | -1.8055  | 0.072706 | 0.223097 | -5.14528 |
| AL355075.4 | 2.646258 | 3.777123 | 1.804632 | 0.072842 | 0.223282 | -4.18147 |
| AL450306.1 | 0.465757 | 5.651943 | 1.804729 | 0.072827 | 0.223282 | -4.84313 |
| AL355353.1 | 0.719248 | 8.456902 | 1.804358 | 0.072885 | 0.223323 | -5.44536 |
| AP000977.1 | 1.85721  | 2.230673 | 1.803583 | 0.073007 | 0.223514 | -4.15789 |
| AC004846.1 | 1.004605 | 6.838883 | 1.803651 | 0.072997 | 0.223514 | -5.04491 |
| AC092375.2 | -0.80878 | 5.056037 | -1.80336 | 0.073042 | 0.223531 | -4.99816 |
| AC104653.2 | 3.344792 | 3.036977 | 1.802511 | 0.073176 | 0.223739 | -4.15024 |
| AC100793.4 | -1.74772 | 2.82469  | -1.80236 | 0.0732   | 0.223739 | -4.57357 |
| AL645933.2 | -0.48402 | 8.267811 | -1.80244 | 0.073188 | 0.223739 | -5.58206 |
| BMP7-AS1   | 3.560068 | -0.21946 | 1.800686 | 0.073465 | 0.224325 | -4.11021 |
| LINC01271  | 1.592472 | 4.309932 | 1.800585 | 0.073481 | 0.224325 | -4.28106 |
| AC009902.2 | 1.356885 | 7.973041 | 1.800827 | 0.073443 | 0.224325 | -5.2919  |
| AC138474.1 | -2.53519 | -0.37051 | -1.80039 | 0.073512 | 0.224328 | -4.20439 |
| AC082651.3 | 3.978028 | 4.836333 | 1.799011 | 0.073731 | 0.224904 | -4.18604 |
| AC126614.1 | 3.217873 | 1.963784 | 1.798105 | 0.073875 | 0.22516  | -4.13731 |
| AC008897.3 | -0.93665 | 4.920406 | -1.79813 | 0.073871 | 0.22516  | -5.00582 |
| AC005529.1 | 3.585649 | 2.555048 | 1.797001 | 0.074051 | 0.225605 | -4.14531 |
| LINC00525  | 3.147837 | 3.847407 | 1.796246 | 0.074171 | 0.225789 | -4.1849  |
| AC141586.2 | -1.07516 | 4.337289 | -1.79633 | 0.074158 | 0.225789 | -4.86421 |
| AC027018.1 | -0.70316 | 5.584716 | -1.79551 | 0.074288 | 0.226054 | -5.11322 |
| AC034243.1 | -1.46225 | 4.486575 | -1.79519 | 0.074339 | 0.226117 | -4.89476 |
| PRAL       | 1.289515 | 4.671749 | 1.794821 | 0.074399 | 0.226207 | -4.38524 |
| AL357315.1 | 3.62531  | 1.573688 | 1.794258 | 0.074489 | 0.226389 | -4.13345 |
| LINC02150  | 2.673259 | -2.2685  | 1.793795 | 0.074563 | 0.226523 | -4.11821 |
| AC127502.2 | 0.507384 | 7.693716 | 1.793415 | 0.074624 | 0.226617 | -5.36727 |
| AL358937.1 | 3.270184 | 3.50851  | 1.793108 | 0.074673 | 0.226675 | -4.17776 |
| AC093424.1 | -1.71078 | 2.949462 | -1.79263 | 0.074749 | 0.226814 | -4.62621 |
| AC015712.7 | 1.403945 | 5.342878 | 1.792349 | 0.074795 | 0.226862 | -4.5899  |
| AC116651.1 | 0.854651 | 5.960012 | 1.791949 | 0.074859 | 0.226965 | -4.71251 |
| LINC01214  | 4.232365 | 1.425176 | 1.791049 | 0.075004 | 0.227221 | -4.13027 |
| AC121757.1 | 3.49956  | 5.757005 | 1.791127 | 0.074992 | 0.227221 | -4.28268 |
| AC005828.1 | 3.209406 | 3.100917 | 1.790643 | 0.07507  | 0.227328 | -4.17032 |
| AC026369.3 | 3.395423 | 1.94703  | 1.789957 | 0.07518  | 0.227571 | -4.14708 |
| AC019118.1 | 2.926344 | 3.160819 | 1.788773 | 0.075372 | 0.227967 | -4.18056 |
| AC012404.1 | -2.78032 | -0.62588 | -1.7884  | 0.075433 | 0.227967 | -4.22584 |
| AL357093.1 | -1.68357 | 2.743279 | -1.78865 | 0.075392 | 0.227967 | -4.50836 |
| AL451085.2 | 0.460339 | 7.933525 | 1.788481 | 0.075419 | 0.227967 | -5.42925 |
| LMO7DN     | 2.473445 | 2.30619  | 1.787819 | 0.075526 | 0.228102 | -4.17202 |
| AC093591.2 | 0.932237 | 4.104281 | 1.787465 | 0.075583 | 0.228102 | -4.37174 |
| AC067930.4 | 1.374083 | 6.881158 | 1.787371 | 0.075599 | 0.228102 | -4.9739  |
| ABCC5-AS1  | -1.03986 | 5.311779 | -1.78751 | 0.075576 | 0.228102 | -5.09531 |
| AC068512.1 | 2.706725 | -2.21413 | 1.784747 | 0.076025 | 0.229075 | -4.13096 |
| AP003550.1 | -2.60096 | -0.58767 | -1.78438 | 0.076085 | 0.229075 | -4.22227 |
| AC132872.2 | 1.393791 | 3.183127 | 1.784292 | 0.076099 | 0.229075 | -4.24169 |

|            |          |          |          |          |          |          |
|------------|----------|----------|----------|----------|----------|----------|
| AC011491.2 | -1.05699 | 4.467305 | -1.78505 | 0.075976 | 0.229075 | -4.83763 |
| AC020604.1 | -0.66852 | 5.053913 | -1.785   | 0.075985 | 0.229075 | -4.97335 |
| AC090559.2 | -0.43923 | 7.316174 | -1.78426 | 0.076104 | 0.229075 | -5.4558  |
| AC004672.2 | -1.03568 | 4.470961 | -1.78392 | 0.07616  | 0.229151 | -4.90143 |
| AC090735.1 | 3.737131 | -1.13178 | 1.783592 | 0.076214 | 0.229221 | -4.13331 |
| AP003555.2 | 2.526314 | 7.852739 | 1.782893 | 0.076328 | 0.22938  | -4.77156 |
| DGUOK-AS1  | 0.638675 | 9.806049 | 1.782896 | 0.076327 | 0.22938  | -5.70782 |
| AC015660.2 | 4.370382 | 3.491987 | 1.782407 | 0.076407 | 0.229436 | -4.17348 |
| DBH-AS1    | -0.74737 | 5.793335 | -1.78249 | 0.076394 | 0.229436 | -5.18565 |
| AC023906.4 | -0.65235 | 4.741383 | -1.78199 | 0.076475 | 0.229547 | -4.88561 |
| AC022113.2 | 3.065391 | -1.71145 | 1.781257 | 0.076596 | 0.229783 | -4.13617 |
| AC245060.6 | -0.41114 | 5.94083  | -1.78114 | 0.076615 | 0.229783 | -5.17805 |
| AC021087.4 | -2.71593 | -1.25919 | -1.77958 | 0.07687  | 0.230457 | -4.20553 |
| CASC20     | 3.969554 | 1.773194 | 1.778291 | 0.077083 | 0.231003 | -4.15457 |
| AP005436.2 | 4.776136 | 3.900823 | 1.777567 | 0.077202 | 0.231176 | -4.18028 |
| AL117382.1 | -2.01286 | 3.789377 | -1.77769 | 0.077183 | 0.231176 | -4.85066 |
| AC007848.1 | 4.214779 | 2.86695  | 1.776874 | 0.077317 | 0.231426 | -4.17091 |
| AC025576.2 | 3.30463  | 3.517935 | 1.77633  | 0.077407 | 0.231457 | -4.20295 |
| LINC01842  | 4.414946 | 6.352454 | 1.7763   | 0.077412 | 0.231457 | -4.28835 |
| AL136982.6 | -1.21342 | 3.623837 | -1.77625 | 0.077419 | 0.231457 | -4.75944 |
| AL137024.1 | -2.48944 | 0.360347 | -1.77295 | 0.077967 | 0.233001 | -4.29099 |
| AC068473.1 | 2.605402 | 0.598586 | 1.772734 | 0.078003 | 0.233017 | -4.16135 |
| AC019155.3 | 4.432675 | 2.346981 | 1.771586 | 0.078194 | 0.233339 | -4.16689 |
| AC091925.1 | 3.607799 | 2.759963 | 1.771526 | 0.078204 | 0.233339 | -4.18397 |
| AC124067.2 | 4.482265 | 7.207039 | 1.771775 | 0.078163 | 0.233339 | -4.38138 |
| AC040174.1 | -1.38199 | 3.729515 | -1.77118 | 0.078263 | 0.233421 | -4.72297 |
| AC099786.1 | 3.291486 | 0.548408 | 1.77009  | 0.078444 | 0.233606 | -4.15858 |
| AC117382.2 | 1.495109 | 2.752149 | 1.770253 | 0.078417 | 0.233606 | -4.23932 |
| AC103809.1 | -2.4454  | 0.049012 | -1.76998 | 0.078463 | 0.233606 | -4.2702  |
| AC091153.3 | 1.116195 | 6.692395 | 1.769873 | 0.07848  | 0.233606 | -5.00128 |
| MED14OS    | 0.460987 | 7.623469 | 1.770152 | 0.078434 | 0.233606 | -5.40565 |
| AL451164.2 | 3.353754 | -0.28215 | 1.769583 | 0.078529 | 0.233658 | -4.15396 |
| AP001269.1 | -0.71981 | 5.505828 | -1.76869 | 0.078679 | 0.234012 | -5.14152 |
| AC022784.6 | 3.637235 | 2.443116 | 1.767688 | 0.078846 | 0.234417 | -4.18525 |
| AC015660.1 | 7.506727 | 5.818277 | 1.766937 | 0.078972 | 0.23459  | -4.18476 |
| AC008700.1 | -1.81162 | 1.930802 | -1.76678 | 0.078998 | 0.23459  | -4.41389 |
| AC010422.1 | -1.00235 | 4.562478 | -1.7669  | 0.078979 | 0.23459  | -4.92174 |
| AC245128.3 | 3.360199 | 4.773232 | 1.766334 | 0.079074 | 0.234722 | -4.26469 |
| AL121721.1 | 3.449286 | 0.175383 | 1.765955 | 0.079138 | 0.234726 | -4.16035 |
| AC004847.1 | 0.838542 | 6.42913  | 1.765967 | 0.079136 | 0.234726 | -4.99667 |
| AL365436.2 | 1.54271  | 7.180695 | 1.765566 | 0.079203 | 0.234828 | -5.07613 |
| AC063948.1 | 2.123289 | 5.957391 | 1.765064 | 0.079288 | 0.234893 | -4.47123 |
| FRMD6-AS1  | 0.971579 | 5.858612 | 1.765173 | 0.079269 | 0.234893 | -4.87974 |
| AC009949.1 | 1.925861 | 1.882917 | 1.763746 | 0.07951  | 0.235459 | -4.20536 |
| AC243547.1 | 3.294177 | -1.15762 | 1.763116 | 0.079617 | 0.235496 | -4.16184 |
| LINC01416  | 3.071802 | -0.93859 | 1.763344 | 0.079578 | 0.235496 | -4.16187 |
| AC005034.5 | -0.32586 | 9.510897 | -1.7632  | 0.079603 | 0.235496 | -5.81839 |
| AC026495.1 | 3.104388 | 0.348197 | 1.762167 | 0.079778 | 0.235735 | -4.16871 |
| AL023803.1 | 5.010381 | 5.641989 | 1.762025 | 0.079802 | 0.235735 | -4.24033 |
| HYI-AS1    | 0.476471 | 6.807449 | 1.7619   | 0.079823 | 0.235735 | -5.2384  |
| AL049835.1 | -0.69448 | 7.07182  | -1.76207 | 0.079795 | 0.235735 | -5.49235 |
| IL21-AS1   | 2.52469  | -0.25313 | 1.761195 | 0.079942 | 0.23581  | -4.16944 |
| AC087742.1 | 2.269731 | 4.156246 | 1.761274 | 0.079929 | 0.23581  | -4.29488 |
| AL354892.2 | 0.520142 | 9.813168 | 1.761488 | 0.079893 | 0.23581  | -5.76115 |
| AL353803.2 | -1.89659 | 1.004396 | -1.76023 | 0.080106 | 0.236179 | -4.32044 |
| AC026367.2 | -0.83065 | 6.434078 | -1.76009 | 0.080131 | 0.236179 | -5.41347 |
| AC019080.4 | 1.877834 | 6.934106 | 1.759698 | 0.080197 | 0.236282 | -4.9028  |
| AC009088.2 | 2.204484 | 3.831723 | 1.758366 | 0.080424 | 0.236858 | -4.30726 |

|            |          |          |          |          |          |          |
|------------|----------|----------|----------|----------|----------|----------|
| AL354872.2 | -1.01641 | 5.669513 | -1.75651 | 0.080741 | 0.237604 | -5.20348 |
| AC069257.1 | 0.631441 | 7.755061 | 1.756522 | 0.080739 | 0.237604 | -5.41806 |
| AC006963.1 | 3.075013 | 0.56359  | 1.75542  | 0.080928 | 0.237892 | -4.18224 |
| AL008718.2 | 2.573691 | 1.470394 | 1.755387 | 0.080933 | 0.237892 | -4.19968 |
| AL354740.1 | 0.478276 | 3.514715 | 1.755683 | 0.080883 | 0.237892 | -4.40122 |
| AL359682.1 | 2.707231 | -2.31075 | 1.755163 | 0.080972 | 0.237912 | -4.17207 |
| C18orf15   | -1.86546 | 0.410679 | -1.75497 | 0.081004 | 0.237914 | -4.28826 |
| SMAD1-AS2  | 2.408338 | 1.745852 | 1.754383 | 0.081106 | 0.238084 | -4.20872 |
| AC015802.5 | 1.702842 | 5.17781  | 1.754269 | 0.081125 | 0.238084 | -4.52515 |
| AL139327.2 | 4.108833 | -0.48981 | 1.753931 | 0.081183 | 0.238161 | -4.17508 |
| AL049775.2 | 3.392968 | -1.19102 | 1.753312 | 0.08129  | 0.238214 | -4.1754  |
| AC122688.4 | 2.151476 | 0.26032  | 1.753273 | 0.081297 | 0.238214 | -4.19075 |
| AL354766.2 | 4.665114 | 2.853238 | 1.753339 | 0.081285 | 0.238214 | -4.19987 |
| AP003390.2 | 3.425751 | 2.443646 | 1.752344 | 0.081457 | 0.23859  | -4.20893 |
| DDX39B-AS1 | 3.112445 | 3.32714  | 1.751906 | 0.081532 | 0.238625 | -4.2322  |
| AP001330.5 | 0.55523  | 8.543509 | 1.75203  | 0.081511 | 0.238625 | -5.5861  |
| AC027237.2 | -1.19027 | 4.21801  | -1.75164 | 0.081579 | 0.238669 | -4.89201 |
| AC040162.3 | 0.305004 | 6.759271 | 1.751164 | 0.08166  | 0.238814 | -5.27365 |
| LINC02288  | -0.85778 | 3.014532 | -1.75086 | 0.081713 | 0.238876 | -4.4928  |
| AL390961.3 | 1.828318 | 2.13987  | 1.750191 | 0.081828 | 0.238881 | -4.23242 |
| AC005332.7 | -1.30549 | 3.99947  | -1.75047 | 0.081781 | 0.238881 | -4.86044 |
| AC018529.2 | 0.53718  | 5.712822 | 1.750512 | 0.081773 | 0.238881 | -4.91252 |
| AC090912.1 | 1.131899 | 6.594486 | 1.750112 | 0.081842 | 0.238881 | -4.97673 |
| AC073046.1 | 0.610884 | 10.06415 | 1.749835 | 0.08189  | 0.238928 | -5.80331 |
| AL031963.3 | 0.527745 | 6.993955 | 1.749125 | 0.082013 | 0.239194 | -5.29028 |
| AC008063.1 | 3.243909 | 1.616    | 1.747236 | 0.082341 | 0.240057 | -4.20466 |
| AC091212.1 | 3.419392 | -1.31668 | 1.746818 | 0.082414 | 0.240166 | -4.18426 |
| AC069148.1 | 2.757993 | 5.059084 | 1.746656 | 0.082442 | 0.240166 | -4.34319 |
| ZBTB46-AS1 | 3.396369 | 1.24113  | 1.745154 | 0.082704 | 0.240835 | -4.20051 |
| AL132801.1 | 2.911874 | 0.174179 | 1.74475  | 0.082774 | 0.240947 | -4.19313 |
| AC090921.1 | 2.90997  | 0.888424 | 1.744243 | 0.082863 | 0.241111 | -4.20281 |
| AC006213.4 | -1.01694 | 5.449112 | -1.74401 | 0.082903 | 0.241134 | -5.24901 |
| LINC01239  | -1.25426 | 4.964258 | -1.7437  | 0.082958 | 0.241201 | -5.04736 |
| AC144548.1 | 0.421764 | 6.964098 | 1.742989 | 0.083082 | 0.241469 | -5.31933 |
| LINC02178  | 5.816047 | 3.643325 | 1.741698 | 0.083309 | 0.241753 | -4.21129 |
| AL031283.2 | 1.889538 | 0.834854 | 1.741836 | 0.083285 | 0.241753 | -4.21741 |
| AC011773.4 | 1.615263 | 3.324941 | 1.742006 | 0.083255 | 0.241753 | -4.30437 |
| AC106820.2 | 0.887722 | 3.320006 | 1.741891 | 0.083275 | 0.241753 | -4.35537 |
| Z97200.1   | 1.962018 | 5.474768 | 1.741059 | 0.083421 | 0.241986 | -4.52535 |
| AL354754.1 | 3.284302 | -1.3783  | 1.740377 | 0.083541 | 0.242147 | -4.19305 |
| AC102953.1 | 3.044177 | 3.080021 | 1.740376 | 0.083541 | 0.242147 | -4.24389 |
| AP001642.1 | 2.621615 | -2.6618  | 1.739763 | 0.083649 | 0.242367 | -4.19304 |
| AC012510.1 | 0.369828 | 7.539136 | 1.739134 | 0.08376  | 0.242594 | -5.45791 |
| LINC02254  | 3.573753 | 2.408652 | 1.737781 | 0.083999 | 0.243144 | -4.22895 |
| ATP1B3-AS1 | 0.683274 | 8.346409 | 1.737693 | 0.084015 | 0.243144 | -5.55562 |
| AP000424.1 | 2.928824 | 3.252254 | 1.737129 | 0.084114 | 0.243292 | -4.26666 |
| AC025766.1 | 2.187553 | 5.222882 | 1.736679 | 0.084194 | 0.243292 | -4.45725 |
| AC092800.1 | -1.75757 | 2.574655 | -1.73649 | 0.084228 | 0.243292 | -4.55235 |
| AC012603.1 | -0.97607 | 5.118684 | -1.73667 | 0.084196 | 0.243292 | -5.12835 |
| ACVR2B-AS1 | -0.46136 | 6.901757 | -1.73678 | 0.084177 | 0.243292 | -5.46629 |
| AC012615.4 | 1.507477 | 5.288388 | 1.73629  | 0.084263 | 0.2433   | -4.63467 |
| AL359182.2 | 3.250229 | 1.927303 | 1.735832 | 0.084344 | 0.243441 | -4.22523 |
| AC005993.1 | 9.361754 | 5.440388 | 1.734959 | 0.084499 | 0.243795 | -4.20975 |
| AC022613.2 | 0.593036 | 6.737472 | 1.734722 | 0.084541 | 0.243823 | -5.24822 |
| AC004839.1 | 1.806837 | 4.832979 | 1.733974 | 0.084674 | 0.244063 | -4.47413 |
| AC026271.3 | 0.518648 | 7.457007 | 1.733888 | 0.084689 | 0.244063 | -5.42595 |
| AC099791.2 | 1.247002 | 5.636998 | 1.733149 | 0.084821 | 0.244349 | -4.65323 |
| AC131956.2 | 3.222964 | -1.16583 | 1.732899 | 0.084866 | 0.244383 | -4.20343 |

|            |          |          |          |          |          |          |
|------------|----------|----------|----------|----------|----------|----------|
| AC008894.1 | -2.61194 | -0.48435 | -1.73222 | 0.084987 | 0.244638 | -4.31024 |
| AP002360.3 | 1.252072 | 6.769212 | 1.731015 | 0.085202 | 0.244998 | -4.96251 |
| AF111167.2 | -0.48824 | 6.055136 | -1.7312  | 0.085168 | 0.244998 | -5.29599 |
| AL139289.2 | 0.535549 | 8.281727 | 1.730654 | 0.085267 | 0.244998 | -5.5671  |
| AC009120.3 | -0.37002 | 8.793142 | -1.73067 | 0.085265 | 0.244998 | -5.7767  |
| Z99129.4   | -0.38773 | 9.785527 | -1.73061 | 0.085275 | 0.244998 | -5.92271 |
| AP000560.1 | -0.38067 | 6.630619 | -1.72966 | 0.085445 | 0.245392 | -5.41702 |
| AC105046.1 | 1.359832 | 3.58365  | 1.728954 | 0.085571 | 0.245662 | -4.37627 |
| AL627309.2 | 4.633119 | 4.583707 | 1.728567 | 0.085641 | 0.245674 | -4.27421 |
| AL160313.1 | -0.83948 | 4.464792 | -1.72859 | 0.085636 | 0.245674 | -4.92197 |
| AC015802.3 | -0.63767 | 5.781536 | -1.72798 | 0.085747 | 0.245885 | -5.27448 |
| AL512656.1 | 0.83187  | 6.430275 | 1.727781 | 0.085782 | 0.245891 | -5.10691 |
| AC116096.1 | -2.29235 | -1.72826 | -1.72664 | 0.085988 | 0.246387 | -4.25828 |
| AC024084.1 | 3.598184 | -0.10139 | 1.72607  | 0.08609  | 0.246492 | -4.21405 |
| AL355922.1 | 3.424437 | 1.158474 | 1.726113 | 0.086082 | 0.246492 | -4.22576 |
| AC084781.1 | 3.229099 | -1.33089 | 1.725415 | 0.086208 | 0.246549 | -4.2135  |
| AL133330.1 | 1.074622 | 7.830382 | 1.725718 | 0.086154 | 0.246549 | -5.40521 |
| AL513365.2 | -0.39001 | 7.030218 | -1.72557 | 0.086181 | 0.246549 | -5.51128 |
| AC024270.4 | 1.234972 | 5.64704  | 1.725168 | 0.086253 | 0.246562 | -4.79235 |
| AC016205.1 | 1.704629 | 6.474204 | 1.725027 | 0.086279 | 0.246562 | -4.82276 |
| AC064836.3 | 0.486998 | 7.92909  | 1.724363 | 0.086398 | 0.24681  | -5.53581 |
| LINC01732  | 3.067253 | -1.64486 | 1.722076 | 0.086813 | 0.247756 | -4.2178  |
| AC011491.3 | -2.39042 | -0.19607 | -1.72199 | 0.086828 | 0.247756 | -4.33069 |
| DPH6-DT    | -1.20347 | 3.26421  | -1.72216 | 0.086797 | 0.247756 | -4.70464 |
| AC132872.3 | 0.379195 | 9.095289 | 1.721212 | 0.08697  | 0.248066 | -5.73849 |
| AC090220.1 | -1.13579 | 2.867789 | -1.72073 | 0.087059 | 0.248224 | -4.59401 |
| AC090772.2 | -0.92742 | 4.560955 | -1.72001 | 0.087189 | 0.248503 | -4.99902 |
| SLFNL1-AS1 | 0.408779 | 6.759606 | 1.719497 | 0.087282 | 0.248674 | -5.30739 |
| AC009951.1 | -1.23404 | 2.172775 | -1.71848 | 0.087469 | 0.248787 | -4.47477 |
| LINC01750  | -0.81195 | 4.268485 | -1.71865 | 0.087436 | 0.248787 | -4.90892 |
| SMIM15-AS1 | -0.59189 | 5.279578 | -1.71848 | 0.087468 | 0.248787 | -5.1064  |
| AC010998.2 | -0.62246 | 5.586459 | -1.7187  | 0.087427 | 0.248787 | -5.25927 |
| AC242842.1 | 0.685639 | 8.416805 | 1.718372 | 0.087488 | 0.248787 | -5.58834 |
| AC067863.1 | 2.473579 | 1.136763 | 1.717548 | 0.087638 | 0.248839 | -4.24905 |
| AC007431.2 | 3.135894 | 1.71714  | 1.71781  | 0.087591 | 0.248839 | -4.25017 |
| AL021937.4 | 2.839703 | 2.982308 | 1.717697 | 0.087611 | 0.248839 | -4.27892 |
| AC009090.5 | 1.013023 | 3.363502 | 1.71805  | 0.087547 | 0.248839 | -4.40014 |
| LINC02657  | 4.153239 | 6.915958 | 1.716644 | 0.087804 | 0.249215 | -4.47561 |
| AC254562.2 | 2.640782 | 3.83506  | 1.716088 | 0.087906 | 0.24941  | -4.31928 |
| AC108751.4 | 2.716464 | 3.367326 | 1.71569  | 0.087979 | 0.249523 | -4.2989  |
| AC007298.2 | 2.880066 | -0.87465 | 1.715013 | 0.088103 | 0.24959  | -4.22839 |
| AC011290.1 | 3.277615 | -0.01669 | 1.714838 | 0.088135 | 0.24959  | -4.23046 |
| RFX3-AS1   | -0.54161 | 6.579026 | -1.7149  | 0.088124 | 0.24959  | -5.46327 |
| AC092687.3 | 0.606922 | 8.015692 | 1.715302 | 0.08805  | 0.24959  | -5.53737 |
| AC092535.3 | -2.53329 | 0.085792 | -1.71359 | 0.088365 | 0.250145 | -4.36865 |
| AL049543.1 | 2.718857 | -0.6742  | 1.712187 | 0.088624 | 0.250784 | -4.23287 |
| AC008687.2 | 3.865036 | 4.810988 | 1.711572 | 0.088738 | 0.250822 | -4.32314 |
| AC084876.1 | 1.120169 | 5.734912 | 1.71168  | 0.088718 | 0.250822 | -4.77461 |
| AC092171.4 | 0.497602 | 6.782825 | 1.711781 | 0.088699 | 0.250822 | -5.27374 |
| AL355001.1 | -0.50808 | 6.211004 | -1.71085 | 0.088871 | 0.251105 | -5.39073 |
| AC025154.2 | -1.98495 | 2.587743 | -1.71026 | 0.088981 | 0.251229 | -4.66406 |
| LINC00653  | -0.39673 | 6.978522 | -1.71025 | 0.088982 | 0.251229 | -5.51594 |
| AC211476.2 | 0.520825 | 6.408054 | 1.709693 | 0.089086 | 0.25126  | -5.17044 |
| AL731566.2 | -1.08335 | 5.205853 | -1.70965 | 0.089093 | 0.25126  | -5.29169 |
| AC008649.2 | 0.556398 | 8.452773 | 1.709939 | 0.08904  | 0.25126  | -5.63809 |
| AL354726.1 | 1.455236 | 5.847756 | 1.709088 | 0.089198 | 0.251461 | -4.75799 |
| BX088651.4 | 2.129727 | 1.939613 | 1.708695 | 0.089271 | 0.251478 | -4.28401 |
| AC055822.1 | -0.45562 | 8.146859 | -1.70877 | 0.089256 | 0.251478 | -5.71906 |

|             |          |          |          |          |          |          |
|-------------|----------|----------|----------|----------|----------|----------|
| AC004906.1  | 2.861664 | 2.68071  | 1.708131 | 0.089375 | 0.251678 | -4.28673 |
| AC109326.1  | 0.711046 | 7.312443 | 1.707303 | 0.08953  | 0.252018 | -5.37854 |
| AC025211.1  | 1.698097 | 5.911162 | 1.705295 | 0.089904 | 0.252977 | -4.70528 |
| AC096751.2  | -1.91616 | 2.138743 | -1.70476 | 0.090005 | 0.253165 | -4.57021 |
| TONSL-AS1   | -0.46937 | 8.437244 | -1.70446 | 0.09006  | 0.253228 | -5.77532 |
| AC098848.1  | -1.31291 | 4.104475 | -1.70404 | 0.090139 | 0.253354 | -4.93321 |
| LARS2-AS1   | 1.469931 | 4.583061 | 1.703716 | 0.0902   | 0.253429 | -4.4775  |
| AC016542.1  | 2.520733 | 5.379102 | 1.702152 | 0.090493 | 0.254158 | -4.48933 |
| AL390838.1  | 2.62933  | -2.14856 | 1.70096  | 0.090717 | 0.254313 | -4.24589 |
| AC111149.2  | 3.788833 | 0.075357 | 1.701294 | 0.090654 | 0.254313 | -4.24776 |
| LINC02477   | -2.61885 | -1.49095 | -1.70124 | 0.090665 | 0.254313 | -4.31744 |
| AC092718.1  | -1.17014 | 3.188715 | -1.70112 | 0.090687 | 0.254313 | -4.70568 |
| AL445685.1  | -1.13775 | 3.338643 | -1.70131 | 0.090652 | 0.254313 | -4.73037 |
| LINC01907   | 1.493834 | 2.55081  | 1.70016  | 0.090868 | 0.25464  | -4.3302  |
| AC012531.2  | -2.14165 | -0.50268 | -1.69995 | 0.090907 | 0.254656 | -4.33463 |
| PIK3CD-AS2  | 0.918451 | 7.715432 | 1.699556 | 0.090982 | 0.254769 | -5.44334 |
| AC010680.5  | -2.28854 | 0.667021 | -1.69928 | 0.091034 | 0.254822 | -4.43692 |
| AC012640.5  | 3.505566 | 1.690892 | 1.697046 | 0.091456 | 0.255907 | -4.27225 |
| ST7-AS1     | 0.588961 | 7.325835 | 1.695752 | 0.091701 | 0.256498 | -5.44822 |
| AC007342.9  | 1.522504 | 8.180773 | 1.694946 | 0.091855 | 0.256831 | -5.39192 |
| AC005392.2  | 2.512472 | 8.680443 | 1.694381 | 0.091962 | 0.257035 | -5.34587 |
| AC090164.2  | 3.360906 | 0.039135 | 1.693903 | 0.092053 | 0.257194 | -4.25839 |
| AL512408.1  | 0.58685  | 6.361635 | 1.693598 | 0.092111 | 0.257261 | -5.19171 |
| LINC00677   | 2.811472 | 2.82774  | 1.693275 | 0.092173 | 0.257337 | -4.31112 |
| AL132989.1  | -0.31782 | 8.927632 | -1.69309 | 0.092209 | 0.257341 | -5.85072 |
| GK-AS1      | 1.44451  | 6.780528 | 1.692381 | 0.092343 | 0.257622 | -5.10961 |
| AC090527.3  | 1.151802 | 5.565371 | 1.692132 | 0.092391 | 0.257658 | -4.71004 |
| AL157904.1  | 2.74392  | 5.227028 | 1.691405 | 0.09253  | 0.257855 | -4.47619 |
| AC073508.3  | 0.521821 | 8.654553 | 1.691524 | 0.092507 | 0.257855 | -5.70695 |
| AC009955.1  | 3.35094  | -1.19115 | 1.690418 | 0.092719 | 0.258286 | -4.26072 |
| MYB-AS1     | 3.475398 | 1.289244 | 1.689683 | 0.09286  | 0.258552 | -4.27711 |
| EXOSC10-AS1 | 0.66831  | 7.105106 | 1.689561 | 0.092883 | 0.258552 | -5.37938 |
| AL031710.2  | 0.572256 | 5.951172 | 1.689182 | 0.092956 | 0.258658 | -5.03997 |
| AC073326.1  | 2.542825 | 3.61837  | 1.688426 | 0.093101 | 0.25887  | -4.35631 |
| ISM1-AS1    | 2.419436 | 3.673648 | 1.688525 | 0.093082 | 0.25887  | -4.36496 |
| AC098828.3  | 3.176514 | 3.606931 | 1.687143 | 0.093348 | 0.25946  | -4.33452 |
| AC112512.1  | -0.29111 | 6.272494 | -1.68683 | 0.093408 | 0.259515 | -5.38822 |
| AC008147.1  | -1.0058  | 6.868179 | -1.68668 | 0.093436 | 0.259515 | -5.63132 |
| AP002336.1  | 2.669649 | 5.79781  | 1.685431 | 0.093678 | 0.26002  | -4.50897 |
| U51244.1    | -1.06352 | 5.169216 | -1.68538 | 0.093688 | 0.26002  | -5.28591 |
| AC005224.4  | 0.904407 | 6.269386 | 1.684725 | 0.093815 | 0.260276 | -5.14611 |
| AC023034.2  | 4.176579 | 2.022296 | 1.682724 | 0.094202 | 0.261255 | -4.28867 |
| AC092068.3  | -1.56775 | 1.505329 | -1.68209 | 0.094325 | 0.261499 | -4.47922 |
| AL133215.3  | 2.024258 | 4.783879 | 1.681724 | 0.094396 | 0.261601 | -4.51321 |
| AC005786.2  | 3.179533 | -0.26804 | 1.681429 | 0.094454 | 0.261663 | -4.27441 |
| LINC01972   | 2.97001  | -1.82431 | 1.680798 | 0.094577 | 0.261838 | -4.273   |
| AC118754.3  | 3.342203 | 0.587207 | 1.680631 | 0.094609 | 0.261838 | -4.28104 |
| AL132656.3  | -0.79938 | 3.499269 | -1.68057 | 0.094622 | 0.261838 | -4.74016 |
| AC246793.1  | 2.422758 | -1.44374 | 1.680177 | 0.094697 | 0.261856 | -4.27442 |
| AC078846.1  | 0.364967 | 6.732036 | 1.680339 | 0.094666 | 0.261856 | -5.37204 |
| LINC02454   | 3.81546  | 3.372649 | 1.679394 | 0.09485  | 0.262116 | -4.31942 |
| AC008083.1  | 3.746591 | 4.891523 | 1.679337 | 0.094861 | 0.262116 | -4.37395 |
| AP003680.1  | 0.699767 | 3.950314 | 1.67896  | 0.094935 | 0.262222 | -4.53967 |
| AC012435.2  | 0.969573 | 6.633075 | 1.678669 | 0.094992 | 0.262283 | -5.10442 |
| AL021392.1  | 1.19302  | 6.131991 | 1.677538 | 0.095213 | 0.262797 | -4.98692 |
| AC020663.2  | -0.9658  | 6.139812 | -1.67682 | 0.095354 | 0.263091 | -5.49351 |
| AC079075.1  | 3.20203  | -0.03447 | 1.6765   | 0.095416 | 0.263165 | -4.28203 |
| AC026368.1  | -0.60907 | 6.85246  | -1.67583 | 0.095548 | 0.263433 | -5.56895 |

|             |          |          |          |          |          |          |
|-------------|----------|----------|----------|----------|----------|----------|
| AC087741.2  | 1.816049 | 7.095039 | 1.674852 | 0.09574  | 0.263839 | -5.11342 |
| MIR762HG    | 0.349206 | 7.312961 | 1.674718 | 0.095766 | 0.263839 | -5.51375 |
| AC007406.4  | 2.850574 | -1.76902 | 1.674091 | 0.095889 | 0.264029 | -4.2819  |
| LINC00239   | 0.965376 | 7.172405 | 1.674011 | 0.095905 | 0.264029 | -5.35181 |
| AC243571.2  | 1.601423 | 3.302919 | 1.673805 | 0.095946 | 0.264044 | -4.40759 |
| AL353719.1  | 0.744836 | 5.021912 | 1.673536 | 0.095999 | 0.264071 | -4.79509 |
| AC034198.2  | -0.83181 | 5.268519 | -1.6734  | 0.096026 | 0.264071 | -5.26003 |
| AC016396.2  | 2.647052 | -2.24239 | 1.672697 | 0.096164 | 0.264161 | -4.28339 |
| AC068985.1  | 3.486158 | -0.78799 | 1.672912 | 0.096122 | 0.264161 | -4.28428 |
| AC010422.2  | 0.54752  | 6.063911 | 1.672819 | 0.09614  | 0.264161 | -5.13346 |
| LINC01565   | 2.320204 | -2.65318 | 1.67199  | 0.096304 | 0.264448 | -4.28404 |
| AC019322.4  | 2.107019 | -1.42638 | 1.671439 | 0.096412 | 0.264649 | -4.28626 |
| AC012254.3  | -0.50622 | 4.544142 | -1.67126 | 0.096447 | 0.264649 | -5.0062  |
| AC148477.3  | 2.867724 | -0.76505 | 1.670616 | 0.096575 | 0.264904 | -4.28786 |
| AC027288.3  | 1.107256 | 4.993056 | 1.670007 | 0.096696 | 0.265041 | -4.69451 |
| AC105339.3  | -0.38219 | 6.259861 | -1.67002 | 0.096693 | 0.265041 | -5.41681 |
| AL160286.3  | -1.78635 | 1.636193 | -1.66925 | 0.096847 | 0.265261 | -4.48986 |
| AL354920.1  | -0.49058 | 7.794341 | -1.66939 | 0.096818 | 0.265261 | -5.7335  |
| AC010275.1  | 6.215815 | 6.146832 | 1.668612 | 0.096973 | 0.265419 | -4.35459 |
| AC100803.1  | 2.199193 | 2.473975 | 1.668259 | 0.097043 | 0.265419 | -4.35496 |
| AC007128.1  | 5.844653 | 6.046529 | 1.668065 | 0.097081 | 0.265419 | -4.36695 |
| LINC00628   | -1.72448 | 2.660927 | -1.6682  | 0.097054 | 0.265419 | -4.74394 |
| AC023510.2  | -1.18198 | 4.024823 | -1.6683  | 0.097034 | 0.265419 | -5.07067 |
| TOB1-AS1    | -0.37951 | 6.605224 | -1.66754 | 0.097186 | 0.265609 | -5.50331 |
| OXCT1-AS1   | -0.83114 | 4.043259 | -1.66733 | 0.097227 | 0.265623 | -4.93185 |
| AC013391.3  | 2.827558 | 1.22064  | 1.66638  | 0.097417 | 0.266046 | -4.31627 |
| AC123905.1  | 3.301202 | -0.34932 | 1.665264 | 0.09764  | 0.266317 | -4.2953  |
| AC245140.1  | 3.2442   | -0.40625 | 1.664527 | 0.097787 | 0.266317 | -4.29625 |
| AC131532.1  | 6.022619 | 3.680311 | 1.664535 | 0.097785 | 0.266317 | -4.31469 |
| AC025171.3  | 2.356746 | 5.603966 | 1.665316 | 0.097629 | 0.266317 | -4.5811  |
| AC016542.3  | -1.07336 | 4.601766 | -1.66446 | 0.0978   | 0.266317 | -5.11037 |
| AC009318.1  | -0.45158 | 6.394531 | -1.66566 | 0.09756  | 0.266317 | -5.48285 |
| IGBP1-AS1   | -0.42207 | 6.513966 | -1.66497 | 0.097699 | 0.266317 | -5.52073 |
| RNASEH1-AS1 | 0.480411 | 9.415193 | 1.664853 | 0.097722 | 0.266317 | -5.86411 |
| AC010608.2  | 4.022757 | 0.912575 | 1.663549 | 0.097983 | 0.266327 | -4.30107 |
| GACAT2      | 2.554825 | 3.642067 | 1.663807 | 0.097931 | 0.266327 | -4.38975 |
| XXYLT1-AS1  | 3.278369 | 4.622576 | 1.663405 | 0.098012 | 0.266327 | -4.40939 |
| AC110285.3  | -2.1694  | 1.0652   | -1.66373 | 0.097946 | 0.266327 | -4.47732 |
| AC023825.2  | 2.343414 | 5.696587 | 1.663382 | 0.098016 | 0.266327 | -4.60414 |
| AC055811.3  | -0.64945 | 5.18315  | -1.66366 | 0.097961 | 0.266327 | -5.19405 |
| AL078645.1  | 3.17322  | 2.005209 | 1.662653 | 0.098162 | 0.266447 | -4.33024 |
| AC011383.1  | -1.94074 | 1.398737 | -1.66263 | 0.098167 | 0.266447 | -4.55604 |
| AC051619.4  | -0.97981 | 4.884444 | -1.66289 | 0.098114 | 0.266447 | -5.23927 |
| AL731571.1  | -0.37259 | 7.520483 | -1.66066 | 0.098562 | 0.267423 | -5.69439 |
| LINC01353   | 1.279991 | 4.33825  | 1.66033  | 0.098629 | 0.267509 | -4.58372 |
| AP001767.4  | -0.62818 | 6.699611 | -1.66011 | 0.098673 | 0.267531 | -5.58976 |
| AL359265.3  | -0.82169 | 5.047366 | -1.65918 | 0.09886  | 0.267942 | -5.22073 |
| AC105345.2  | 2.025571 | 3.541958 | 1.658938 | 0.09891  | 0.26798  | -4.41144 |
| MPRIIP-AS1  | 0.790737 | 5.28792  | 1.658637 | 0.09897  | 0.268048 | -4.80814 |
| AL445471.2  | 2.358969 | -2.5005  | 1.657977 | 0.099104 | 0.268216 | -4.30252 |
| AC138932.5  | -0.4253  | 8.201374 | -1.65808 | 0.099084 | 0.268216 | -5.81291 |
| AC112484.3  | 0.840341 | 7.638508 | 1.657342 | 0.099232 | 0.268467 | -5.53133 |
| HEXD-IT1    | -0.52083 | 5.435076 | -1.65683 | 0.099336 | 0.268552 | -5.26156 |
| AC026470.3  | 0.883861 | 7.008107 | 1.656573 | 0.099388 | 0.268552 | -5.37631 |
| AL133410.1  | -1.2449  | 5.309401 | -1.65648 | 0.099407 | 0.268552 | -5.39697 |
| AC010487.2  | -1.07234 | 6.243457 | -1.65648 | 0.099407 | 0.268552 | -5.59952 |
| AC091170.1  | 3.283461 | 0.045207 | 1.655781 | 0.099549 | 0.268742 | -4.30931 |
| WNT5A-AS1   | 1.339115 | 9.019457 | 1.655918 | 0.099521 | 0.268742 | -5.72191 |



|            |          |          |          |          |          |          |
|------------|----------|----------|----------|----------|----------|----------|
| AC005618.1 | 1.018358 | 5.835827 | 1.655371 | 0.099632 | 0.26887  | -4.97852 |
| AC096947.1 | -0.91312 | 5.24747  | -1.65504 | 0.099698 | 0.268892 | -5.33794 |
| AL121753.2 | -0.37686 | 8.343623 | -1.65498 | 0.099712 | 0.268892 | -5.83206 |
| AC073641.1 | 2.642781 | 2.648221 | 1.654276 | 0.099854 | 0.269108 | -4.36478 |
| AC129510.1 | 0.440727 | 8.099433 | 1.654231 | 0.099863 | 0.269108 | -5.68262 |
| CARS-AS1   | -0.56809 | 3.990436 | -1.65339 | 0.100035 | 0.269185 | -4.81734 |
| AC103923.1 | -0.74965 | 5.475962 | -1.65364 | 0.099984 | 0.269185 | -5.29291 |
| AL138976.2 | 0.62513  | 7.358915 | 1.653609 | 0.09999  | 0.269185 | -5.51752 |
| UBE2R2-AS1 | 0.594215 | 7.438077 | 1.653407 | 0.100031 | 0.269185 | -5.53573 |
| AP002387.2 | 0.742091 | 10.21144 | 1.652688 | 0.100178 | 0.269471 | -5.97018 |
| AC005379.1 | 3.312732 | -0.12004 | 1.652488 | 0.100218 | 0.269485 | -4.31274 |
| LINC01063  | 0.74547  | 7.047619 | 1.652141 | 0.100289 | 0.269579 | -5.40615 |
| LINC02026  | 1.238231 | 4.477246 | 1.651628 | 0.100394 | 0.269682 | -4.60552 |
| AC114956.1 | 1.953174 | 6.944907 | 1.651601 | 0.100399 | 0.269682 | -4.94809 |
| AC002044.2 | -0.41433 | 6.790879 | -1.65092 | 0.100539 | 0.269961 | -5.58218 |
| AC131212.4 | 1.371598 | 3.912001 | 1.650138 | 0.100699 | 0.270039 | -4.51385 |
| AC120057.3 | 0.62205  | 5.183654 | 1.650073 | 0.100712 | 0.270039 | -4.90825 |
| ERICD      | 0.546699 | 5.752544 | 1.650543 | 0.100616 | 0.270039 | -5.08136 |
| AC109460.1 | 0.307648 | 6.545788 | 1.65034  | 0.100657 | 0.270039 | -5.36678 |
| AC097381.2 | 2.924579 | 0.567642 | 1.649182 | 0.100894 | 0.270432 | -4.32753 |
| AC073316.2 | 3.282273 | 1.283665 | 1.64607  | 0.101534 | 0.27205  | -4.33671 |
| CXXC5-AS1  | -2.28026 | 0.523295 | -1.64586 | 0.101577 | 0.272067 | -4.47762 |
| AL157392.1 | 3.240019 | 1.452805 | 1.645454 | 0.101661 | 0.272196 | -4.34127 |
| AL606760.2 | -0.32019 | 5.658395 | -1.64506 | 0.101742 | 0.272314 | -5.28541 |
| TNK2-AS1   | 1.063205 | 5.406761 | 1.644795 | 0.101797 | 0.272366 | -4.84718 |
| LINC00336  | 2.424092 | 2.760646 | 1.644336 | 0.101892 | 0.272523 | -4.38737 |
| AL021707.6 | 0.384698 | 9.106246 | 1.643775 | 0.102008 | 0.272736 | -5.86538 |
| AC040174.2 | -1.96007 | 3.072766 | -1.64333 | 0.102101 | 0.272887 | -4.80812 |
| AC012363.1 | 5.179785 | 4.050793 | 1.642287 | 0.102316 | 0.273365 | -4.36604 |
| AC092669.1 | 2.970129 | -1.03495 | 1.642016 | 0.102373 | 0.273381 | -4.32472 |
| AC112693.3 | 2.261853 | -0.14511 | 1.641383 | 0.102504 | 0.273381 | -4.33549 |
| AC020934.2 | 2.697716 | 3.717837 | 1.641512 | 0.102477 | 0.273381 | -4.42002 |
| AC106801.1 | -0.65212 | 4.081194 | -1.64154 | 0.102471 | 0.273381 | -4.90423 |
| AL078581.3 | -0.32584 | 6.762994 | -1.64156 | 0.102468 | 0.273381 | -5.58297 |
| AL358333.2 | 3.028896 | -0.26409 | 1.640716 | 0.102643 | 0.273556 | -4.32843 |
| AC004584.1 | 2.228937 | 4.300407 | 1.64084  | 0.102617 | 0.273556 | -4.48625 |
| AP000317.2 | -1.8464  | 1.189464 | -1.64041 | 0.102706 | 0.273629 | -4.551   |
| AC007879.4 | 3.430785 | 3.935794 | 1.639626 | 0.10287  | 0.273869 | -4.40089 |
| AC244517.7 | 2.555637 | 6.251442 | 1.639705 | 0.102853 | 0.273869 | -4.71358 |
| AL662795.2 | -0.40428 | 9.724351 | -1.63809 | 0.10319  | 0.274625 | -6.07185 |
| AC025575.1 | 3.214299 | 0.784797 | 1.637401 | 0.103334 | 0.274783 | -4.34181 |
| AC110491.1 | -2.33178 | -1.29737 | -1.63711 | 0.103396 | 0.274783 | -4.39937 |
| AC005746.3 | 2.542958 | 3.563364 | 1.637599 | 0.103292 | 0.274783 | -4.43046 |
| AC006262.1 | 1.792254 | 4.483915 | 1.637148 | 0.103387 | 0.274783 | -4.57799 |
| AC108159.1 | 2.835377 | 2.595812 | 1.636896 | 0.10344  | 0.274802 | -4.38328 |
| AC007278.1 | -1.30435 | 2.970276 | -1.63556 | 0.10372  | 0.275449 | -4.77848 |
| AP001020.3 | 0.411943 | 6.290308 | 1.635272 | 0.10378  | 0.275511 | -5.31741 |
| AL136531.3 | -0.78959 | 5.207304 | -1.63496 | 0.103846 | 0.275589 | -5.29468 |
| AL352984.1 | 3.58837  | 1.614415 | 1.634325 | 0.103979 | 0.275666 | -4.35527 |
| AL390961.2 | 2.208001 | 5.095005 | 1.634154 | 0.104015 | 0.275666 | -4.59616 |
| AL161909.2 | -0.77225 | 5.685509 | -1.63453 | 0.103935 | 0.275666 | -5.44645 |
| AL035587.1 | 0.501555 | 8.628492 | 1.63412  | 0.104021 | 0.275666 | -5.79044 |
| LINC01186  | 1.601693 | 6.634515 | 1.63326  | 0.104202 | 0.276048 | -5.10684 |
| CIRBP-AS1  | 0.466229 | 8.63105  | 1.632583 | 0.104345 | 0.276329 | -5.80364 |
| AL022328.3 | 0.340171 | 7.976016 | 1.632332 | 0.104398 | 0.276371 | -5.71687 |
| AC105206.2 | -0.38056 | 6.901391 | -1.63192 | 0.104484 | 0.276502 | -5.63561 |
| AC004941.1 | 2.142172 | -0.30248 | 1.631526 | 0.104568 | 0.276534 | -4.34732 |
| HMGN3-AS1  | 0.421562 | 7.671656 | 1.631516 | 0.10457  | 0.276534 | -5.6478  |

|            |          |          |          |          |          |          |
|------------|----------|----------|----------|----------|----------|----------|
| AC083805.2 | -1.01873 | 4.307792 | -1.63117 | 0.104643 | 0.27663  | -5.08075 |
| HGC6.3     | -2.35466 | -0.64991 | -1.63085 | 0.104711 | 0.27668  | -4.4353  |
| AL080317.2 | -0.34914 | 6.814632 | -1.63073 | 0.104735 | 0.27668  | -5.60513 |
| RAI1-AS1   | -0.51884 | 5.131673 | -1.63052 | 0.104781 | 0.276702 | -5.22292 |
| AC107204.1 | -0.98218 | 2.294744 | -1.63024 | 0.104839 | 0.27676  | -4.59434 |
| AC011365.1 | -1.27561 | 1.707078 | -1.62982 | 0.104927 | 0.276895 | -4.53933 |
| AC017033.1 | 3.052271 | 0.704383 | 1.62831  | 0.105248 | 0.277591 | -4.35505 |
| AL161773.1 | 2.556985 | 1.004207 | 1.628147 | 0.105283 | 0.277591 | -4.36543 |
| SCAMP1-AS1 | 0.379979 | 9.350299 | 1.628057 | 0.105302 | 0.277591 | -5.92598 |
| AL122010.1 | -0.27729 | 8.931137 | -1.62752 | 0.105417 | 0.277796 | -5.95352 |
| LINC02198  | 2.427783 | 2.386884 | 1.626739 | 0.105582 | 0.278036 | -4.39779 |
| SNHG18     | -0.72588 | 8.966196 | -1.62674 | 0.105581 | 0.278036 | -6.02452 |
| LINC02473  | 2.373682 | 1.30285  | 1.626247 | 0.105687 | 0.278162 | -4.37821 |
| AC135586.2 | -2.32428 | -0.65898 | -1.62617 | 0.105704 | 0.278162 | -4.45199 |
| DIP2A-IT1  | -0.35945 | 7.30434  | -1.6251  | 0.10593  | 0.27866  | -5.7183  |
| NALCN-AS1  | -1.70296 | 1.053383 | -1.62425 | 0.106112 | 0.279041 | -4.52582 |
| AC122108.2 | 3.502868 | 1.54228  | 1.622837 | 0.106415 | 0.279574 | -4.36898 |
| AC120498.2 | -2.31286 | 1.772513 | -1.62278 | 0.106426 | 0.279574 | -4.65317 |
| AC010719.1 | -0.62921 | 7.205626 | -1.6229  | 0.1064   | 0.279574 | -5.73387 |
| AL158151.1 | 1.095635 | 4.248255 | 1.622331 | 0.106523 | 0.27973  | -4.60125 |
| LINC01833  | 4.058684 | 5.150963 | 1.620841 | 0.106842 | 0.280399 | -4.4632  |
| AL353763.1 | -0.50386 | 6.538863 | -1.62079 | 0.106853 | 0.280399 | -5.59738 |
| AL135937.1 | 2.573241 | 3.877883 | 1.620444 | 0.106928 | 0.2804   | -4.45966 |
| AC127024.4 | -0.38281 | 8.383599 | -1.62061 | 0.106892 | 0.2804   | -5.89702 |
| TTLL7-IT1  | -1.81407 | 0.048517 | -1.61999 | 0.107024 | 0.280546 | -4.45764 |
| MGAT3-AS1  | -1.76898 | 3.618727 | -1.61984 | 0.107058 | 0.280546 | -4.98085 |
| AC117422.1 | 3.222273 | 0.116162 | 1.619148 | 0.107206 | 0.28074  | -4.35772 |
| AL021578.1 | 0.654438 | 7.687408 | 1.619291 | 0.107176 | 0.28074  | -5.62935 |
| AP000525.1 | 4.803998 | 5.771033 | 1.61881  | 0.107279 | 0.280832 | -4.45826 |
| AC087761.1 | 2.868651 | 0.516232 | 1.618098 | 0.107433 | 0.281038 | -4.36723 |
| AP002336.2 | 0.721532 | 7.972896 | 1.618174 | 0.107416 | 0.281038 | -5.67114 |
| AL161908.1 | 2.998919 | 1.648449 | 1.616882 | 0.107695 | 0.281529 | -4.38474 |
| AC004381.1 | -2.14541 | 1.231511 | -1.61696 | 0.107678 | 0.281529 | -4.58252 |
| AL589765.1 | 3.202196 | -0.12282 | 1.616218 | 0.107839 | 0.281806 | -4.36004 |
| LINC02600  | -0.97185 | 4.001013 | -1.61521 | 0.108057 | 0.28218  | -5.04003 |
| BX322234.1 | 0.56229  | 7.941147 | 1.615248 | 0.108049 | 0.28218  | -5.70428 |
| AL031600.1 | 0.444187 | 8.569501 | 1.614723 | 0.108162 | 0.282357 | -5.82093 |
| ASTN2-AS1  | 2.646711 | -0.20113 | 1.613104 | 0.108514 | 0.283177 | -4.36706 |
| AC130456.3 | -1.53159 | 6.345762 | -1.61275 | 0.108591 | 0.283279 | -5.73845 |
| AC022973.3 | 0.65626  | 6.850548 | 1.611871 | 0.108782 | 0.28368  | -5.44997 |
| AC026355.2 | 2.769481 | -1.99544 | 1.611671 | 0.108826 | 0.283695 | -4.36261 |
| AL360219.1 | 2.941306 | 5.084958 | 1.611387 | 0.108888 | 0.283758 | -4.54109 |
| AC132938.5 | -0.37045 | 6.867265 | -1.6111  | 0.108951 | 0.283824 | -5.66305 |
| AL132780.5 | 0.411309 | 6.397678 | 1.610513 | 0.109078 | 0.284057 | -5.36036 |
| AC037486.1 | 3.017976 | -0.40726 | 1.609771 | 0.109241 | 0.284381 | -4.36753 |
| LINC01205  | 2.465379 | -0.68421 | 1.608595 | 0.109498 | 0.28462  | -4.37009 |
| AC020922.4 | 3.170283 | -0.05426 | 1.608486 | 0.109522 | 0.28462  | -4.37046 |
| AC093908.1 | 0.661094 | 5.345927 | 1.608911 | 0.109428 | 0.28462  | -5.01091 |
| PRRT3-AS1  | 0.556531 | 9.14262  | 1.609019 | 0.109405 | 0.28462  | -5.90079 |
| AC012306.2 | 0.361501 | 9.239568 | 1.608501 | 0.109518 | 0.28462  | -5.94891 |
| AC021755.2 | -1.55422 | 2.361802 | -1.60787 | 0.109656 | 0.284771 | -4.6885  |
| AC005838.2 | -0.61712 | 7.626318 | -1.60789 | 0.109653 | 0.284771 | -5.82689 |
| AC020931.1 | 0.422034 | 5.859434 | 1.607362 | 0.109768 | 0.284964 | -5.23798 |
| AC022154.1 | 0.358726 | 5.942637 | 1.606539 | 0.109949 | 0.285334 | -5.25897 |
| AC009779.5 | 2.86453  | -1.73715 | 1.605677 | 0.110138 | 0.285728 | -4.37044 |
| AC008507.3 | 2.323009 | -2.72005 | 1.605081 | 0.110269 | 0.285884 | -4.37043 |
| AC092117.1 | 0.605415 | 5.80942  | 1.605057 | 0.110275 | 0.285884 | -5.14182 |
| AC092171.5 | 0.449939 | 7.819284 | 1.604489 | 0.1104   | 0.28611  | -5.7158  |

|             |          |          |          |          |          |          |
|-------------|----------|----------|----------|----------|----------|----------|
| AP005131.1  | -1.05606 | 2.716904 | -1.60399 | 0.110511 | 0.286299 | -4.71226 |
| LINC01348   | 0.873216 | 6.76208  | 1.603721 | 0.110569 | 0.286351 | -5.36197 |
| AC009061.1  | 2.177257 | 5.290061 | 1.603452 | 0.110628 | 0.286406 | -4.6411  |
| AC020911.2  | -2.01719 | 0.7516   | -1.60294 | 0.110741 | 0.286598 | -4.53189 |
| AC245014.1  | 2.859362 | 1.648795 | 1.60266  | 0.110803 | 0.28661  | -4.40878 |
| AC099811.1  | 0.573956 | 5.411538 | 1.602579 | 0.110821 | 0.28661  | -5.05257 |
| AC116366.2  | 2.541212 | 3.231738 | 1.601922 | 0.110967 | 0.286886 | -4.45446 |
| AL590609.3  | 3.277711 | -1.07427 | 1.601425 | 0.111077 | 0.287072 | -4.37642 |
| AC008750.1  | 2.762613 | 4.645637 | 1.601201 | 0.111126 | 0.287089 | -4.52494 |
| TBL1XR1-AS1 | 1.26632  | 5.272415 | 1.60105  | 0.111116 | 0.287089 | -4.86393 |
| AC087491.1  | 4.792024 | 4.890169 | 1.600544 | 0.111272 | 0.287281 | -4.44932 |
| AC069213.1  | 1.109585 | 4.734481 | 1.600224 | 0.111343 | 0.287365 | -4.71958 |
| TRPC7-AS1   | 3.635014 | 2.240319 | 1.599225 | 0.111565 | 0.287582 | -4.41023 |
| AC002401.1  | 2.628312 | 2.551057 | 1.59878  | 0.111664 | 0.287582 | -4.43751 |
| AC005821.1  | 1.699375 | 2.256587 | 1.598639 | 0.111695 | 0.287582 | -4.45171 |
| AC092608.1  | -2.01699 | 2.038765 | -1.59949 | 0.111506 | 0.287582 | -4.69739 |
| AC091946.2  | -1.69279 | 2.888881 | -1.59864 | 0.111694 | 0.287582 | -4.85525 |
| AL023584.2  | 1.438613 | 5.438364 | 1.598838 | 0.111651 | 0.287582 | -4.91542 |
| CAPN10-DT   | 0.332943 | 7.099982 | 1.599453 | 0.111514 | 0.287582 | -5.59312 |
| AL359851.1  | 2.128776 | 0.836589 | 1.597979 | 0.111842 | 0.287636 | -4.4089  |
| AC104051.2  | -2.17886 | -2.16705 | -1.59803 | 0.11183  | 0.287636 | -4.42421 |
| AF250324.1  | -2.4093  | 0.121374 | -1.59786 | 0.111869 | 0.287636 | -4.55209 |
| PCOLCE-AS1  | -0.62706 | 3.70912  | -1.59799 | 0.111841 | 0.287636 | -4.8616  |
| AC022167.4  | 2.766861 | 1.901503 | 1.597274 | 0.111999 | 0.287871 | -4.42084 |
| AC010504.1  | -0.4461  | 6.268117 | -1.59701 | 0.112057 | 0.287922 | -5.56279 |
| PLA2G4E-AS1 | 2.813256 | 4.586241 | 1.596108 | 0.112259 | 0.288343 | -4.51929 |
| LINC02285   | -1.44165 | 2.236032 | -1.59563 | 0.112365 | 0.288516 | -4.73595 |
| AL137129.1  | 2.812739 | -0.82068 | 1.594815 | 0.112548 | 0.28884  | -4.38559 |
| AC004951.1  | 0.277956 | 7.278797 | 1.594727 | 0.112568 | 0.28884  | -5.65668 |
| AC018645.2  | 0.362494 | 10.49489 | 1.594498 | 0.112619 | 0.288873 | -6.15406 |
| AC010542.4  | 1.362771 | 2.395918 | 1.593878 | 0.112758 | 0.28913  | -4.47192 |
| AC009955.2  | 3.258691 | -0.16363 | 1.593102 | 0.112932 | 0.28928  | -4.38893 |
| AC007099.1  | 2.952851 | 0.868498 | 1.593199 | 0.11291  | 0.28928  | -4.40433 |
| AC099568.2  | 0.784863 | 6.865395 | 1.593156 | 0.11292  | 0.28928  | -5.42693 |
| AL162430.2  | -0.5477  | 6.283146 | -1.59198 | 0.113185 | 0.289829 | -5.60579 |
| AL008718.3  | 0.520686 | 7.201498 | 1.591494 | 0.113293 | 0.290008 | -5.59167 |
| AC090948.1  | -0.41032 | 6.92412  | -1.59125 | 0.113347 | 0.290047 | -5.70638 |
| AC109454.3  | 5.393338 | 3.959628 | 1.590698 | 0.113473 | 0.290269 | -4.42703 |
| AC020765.2  | 0.447147 | 7.280239 | 1.59012  | 0.113603 | 0.290503 | -5.63282 |
| AC012417.1  | 2.72274  | 0.0004   | 1.589587 | 0.113723 | 0.290625 | -4.39876 |
| AC074044.1  | 2.192408 | 4.227024 | 1.589566 | 0.113728 | 0.290625 | -4.5435  |
| AC011444.3  | -1.90378 | 1.97206  | -1.5886  | 0.113947 | 0.29108  | -4.74075 |
| LINC01978   | -1.12754 | 5.361094 | -1.58843 | 0.113983 | 0.29108  | -5.46721 |
| AC011298.1  | 2.73988  | 0.961428 | 1.586865 | 0.114339 | 0.291888 | -4.41684 |
| AC092747.1  | 2.806598 | -1.79728 | 1.586561 | 0.114407 | 0.291964 | -4.39448 |
| AL139082.1  | 1.174118 | 3.15856  | 1.58603  | 0.114528 | 0.292173 | -4.5429  |
| AC004888.1  | 3.077932 | -0.9404  | 1.584626 | 0.114847 | 0.292887 | -4.39794 |
| AC025430.1  | -0.50651 | 6.783906 | -1.5838  | 0.115035 | 0.293268 | -5.70733 |
| AC115837.2  | 3.001629 | 1.422504 | 1.583446 | 0.115116 | 0.293268 | -4.42625 |
| AC117503.1  | 2.695419 | 2.665459 | 1.583421 | 0.115121 | 0.293268 | -4.46111 |
| AL357153.1  | 2.163554 | 2.504812 | 1.583071 | 0.115201 | 0.293268 | -4.46922 |
| AP003117.2  | -2.39093 | -0.71348 | -1.58318 | 0.115176 | 0.293268 | -4.49277 |
| AC005726.5  | 1.496881 | 3.512333 | 1.582942 | 0.11523  | 0.293268 | -4.54178 |
| AL360270.1  | 0.537002 | 6.781708 | 1.582672 | 0.115292 | 0.293325 | -5.4956  |
| AC005899.3  | -2.2311  | 0.872959 | -1.58159 | 0.115539 | 0.293854 | -4.61014 |
| AC068790.7  | -0.53048 | 7.167212 | -1.5802  | 0.115857 | 0.294564 | -5.78225 |
| AC074029.3  | -0.83204 | 5.511015 | -1.57988 | 0.115931 | 0.294652 | -5.45565 |
| AC022001.2  | 2.798728 | 0.343582 | 1.577927 | 0.116379 | 0.295016 | -4.41707 |

|             |          |          |          |          |          |          |
|-------------|----------|----------|----------|----------|----------|----------|
| AC144450.1  | 2.785496 | 0.604954 | 1.577723 | 0.116425 | 0.295016 | -4.42059 |
| AC010789.1  | 5.57943  | 4.093127 | 1.577544 | 0.116466 | 0.295016 | -4.45052 |
| AC007448.2  | 2.870475 | 3.132196 | 1.57841  | 0.116268 | 0.295016 | -4.47886 |
| STPG3-AS1   | 1.250219 | 4.333224 | 1.578355 | 0.11628  | 0.295016 | -4.68516 |
| STK4-AS1    | 0.596059 | 5.247773 | 1.578678 | 0.116206 | 0.295016 | -4.9915  |
| AC078909.1  | -1.42762 | 4.05832  | -1.57754 | 0.116467 | 0.295016 | -5.05004 |
| AL096828.3  | 1.219563 | 6.480443 | 1.578045 | 0.116351 | 0.295016 | -5.22452 |
| AC055720.2  | -0.8532  | 7.552359 | -1.57803 | 0.116355 | 0.295016 | -5.89745 |
| AC245060.2  | -0.40562 | 9.576044 | -1.57757 | 0.116461 | 0.295016 | -6.14951 |
| AP001065.2  | 3.331114 | -0.56669 | 1.577017 | 0.116588 | 0.295171 | -4.40797 |
| AC009163.1  | 2.868414 | 0.687496 | 1.576935 | 0.116607 | 0.295171 | -4.42277 |
| LINC02561   | 4.801748 | 5.519403 | 1.576348 | 0.116742 | 0.295346 | -4.49866 |
| AC084757.2  | 1.747317 | 4.518759 | 1.576292 | 0.116755 | 0.295346 | -4.64585 |
| AP001062.2  | 3.587873 | 1.95802  | 1.576076 | 0.116804 | 0.295372 | -4.43506 |
| AC015813.1  | -0.47081 | 8.727296 | -1.57547 | 0.116943 | 0.295624 | -6.02771 |
| AC092171.3  | 0.504537 | 7.450433 | 1.575271 | 0.11699  | 0.295643 | -5.68393 |
| AC134772.1  | 2.528318 | -1.34742 | 1.575094 | 0.117031 | 0.295647 | -4.40957 |
| AC022400.3  | 0.973398 | 2.453564 | 1.57436  | 0.117201 | 0.295855 | -4.52334 |
| AC015802.4  | 0.431287 | 5.575454 | 1.573995 | 0.117285 | 0.295855 | -5.20404 |
| FAM66B      | -0.63861 | 5.028486 | -1.57432 | 0.11721  | 0.295855 | -5.33209 |
| AC023830.1  | -0.39534 | 5.576909 | -1.57418 | 0.117241 | 0.295855 | -5.35818 |
| Z93930.3    | -0.33458 | 6.553903 | -1.57389 | 0.11731  | 0.295855 | -5.64073 |
| AL451042.2  | 0.575199 | 7.934911 | 1.572196 | 0.117702 | 0.296742 | -5.77018 |
| AC105219.1  | 0.359336 | 6.5893   | 1.571119 | 0.117952 | 0.297273 | -5.50919 |
| AL136040.1  | 0.494362 | 6.453982 | 1.57069  | 0.118051 | 0.297424 | -5.44105 |
| AP002840.2  | -0.37024 | 7.696355 | -1.57028 | 0.118145 | 0.297562 | -5.86567 |
| AL353803.4  | 1.518085 | 2.492252 | 1.569701 | 0.118281 | 0.297804 | -4.50413 |
| AC091729.1  | 1.25676  | 5.751132 | 1.569434 | 0.118343 | 0.297826 | -5.02109 |
| AC243965.2  | -0.48352 | 4.490731 | -1.56932 | 0.118369 | 0.297826 | -5.11261 |
| AC005224.1  | 0.418429 | 6.296194 | 1.568309 | 0.118606 | 0.298321 | -5.41566 |
| AC025171.4  | 0.515628 | 6.726314 | 1.567833 | 0.118717 | 0.2985   | -5.52149 |
| LINC02448   | 3.138562 | -1.17084 | 1.567092 | 0.11889  | 0.298795 | -4.41932 |
| AC084125.3  | 2.992013 | -0.63327 | 1.566991 | 0.118913 | 0.298795 | -4.42061 |
| AC116903.2  | 1.1164   | 5.02372  | 1.566382 | 0.119056 | 0.298953 | -4.89802 |
| AC073534.2  | -1.41444 | 3.905889 | -1.56654 | 0.11902  | 0.298953 | -5.11055 |
| TPRG1-AS2   | 3.088361 | 2.16114  | 1.565397 | 0.119287 | 0.299432 | -4.46393 |
| AL096865.1  | 1.838456 | 6.115962 | 1.564516 | 0.119493 | 0.299681 | -4.89759 |
| AC010680.4  | -1.08206 | 5.357259 | -1.56446 | 0.119505 | 0.299681 | -5.4952  |
| CCDC183-AS1 | -0.41254 | 8.167313 | -1.56471 | 0.119447 | 0.299681 | -5.95687 |
| AC011773.1  | 2.543251 | 5.05281  | 1.56424  | 0.119558 | 0.299713 | -4.65663 |
| LINC02166   | 0.454527 | 7.310219 | 1.56401  | 0.119612 | 0.299748 | -5.66344 |
| AL807752.5  | 0.493129 | 6.277012 | 1.56292  | 0.119868 | 0.30029  | -5.40768 |
| AC024267.4  | 0.829795 | 5.024481 | 1.562666 | 0.119928 | 0.300339 | -4.8765  |
| AL450322.1  | 3.327964 | 0.158026 | 1.562055 | 0.120072 | 0.3006   | -4.42913 |
| HCFC1-AS1   | -1.77381 | 2.313083 | -1.56176 | 0.120142 | 0.300603 | -4.79193 |
| AL451047.1  | -1.44031 | 2.897492 | -1.56171 | 0.120153 | 0.300603 | -4.8446  |
| AL049747.1  | 2.771447 | -0.76808 | 1.561339 | 0.120241 | 0.300658 | -4.42754 |
| AC005479.1  | 1.779632 | 5.829033 | 1.561276 | 0.120255 | 0.300658 | -4.86909 |
| AC027281.2  | 1.078853 | 5.385602 | 1.560976 | 0.120326 | 0.30069  | -4.96392 |
| HDHD5-AS1   | -0.53791 | 6.010464 | -1.56088 | 0.120348 | 0.30069  | -5.5461  |
| AC012615.1  | 0.327806 | 8.307303 | 1.560139 | 0.120524 | 0.301029 | -5.88354 |
| LINC02037   | 2.501417 | -1.98885 | 1.558709 | 0.120862 | 0.301427 | -4.4289  |
| AC012174.1  | 3.270568 | -0.12027 | 1.558562 | 0.120897 | 0.301427 | -4.4322  |
| FAM242A     | -2.25198 | -1.80293 | -1.55907 | 0.120776 | 0.301427 | -4.48501 |
| AC092068.2  | -0.98584 | 2.700849 | -1.55848 | 0.120917 | 0.301427 | -4.75246 |
| AC011444.2  | -1.06355 | 3.833186 | -1.5587  | 0.120865 | 0.301427 | -5.14038 |
| AC131953.1  | -0.98566 | 5.053245 | -1.55845 | 0.120924 | 0.301427 | -5.43392 |
| AL035425.3  | -2.0597  | 0.356662 | -1.55779 | 0.121079 | 0.301614 | -4.5806  |

|             |          |          |          |          |          |          |
|-------------|----------|----------|----------|----------|----------|----------|
| AC133644.2  | 1.394701 | 6.20482  | 1.557811 | 0.121075 | 0.301614 | -5.09587 |
| AC005522.1  | 2.124064 | 5.090151 | 1.555988 | 0.121508 | 0.302521 | -4.69443 |
| U52111.1    | 0.453617 | 6.969223 | 1.555921 | 0.121524 | 0.302521 | -5.61263 |
| AC018761.3  | 2.429388 | 3.906608 | 1.555492 | 0.121626 | 0.302674 | -4.56946 |
| AL135790.1  | 3.483552 | 0.616202 | 1.554971 | 0.12175  | 0.302682 | -4.44149 |
| U47924.1    | 2.221118 | 5.242718 | 1.555265 | 0.12168  | 0.302682 | -4.70668 |
| AC073389.1  | 0.461612 | 6.964683 | 1.554985 | 0.121747 | 0.302682 | -5.6041  |
| AL024508.2  | 0.831586 | 8.170808 | 1.554441 | 0.121876 | 0.302896 | -5.7768  |
| MRGPRF-AS1  | -1.49445 | 1.128213 | -1.55366 | 0.122062 | 0.303064 | -4.62595 |
| AC040169.3  | 0.464707 | 6.895262 | 1.553834 | 0.122021 | 0.303064 | -5.58171 |
| AL360091.1  | 0.444459 | 7.248749 | 1.55365  | 0.122065 | 0.303064 | -5.68048 |
| AL596223.2  | 3.864747 | 0.871315 | 1.552389 | 0.122366 | 0.303712 | -4.44431 |
| AL162727.2  | -0.98718 | 5.462012 | -1.5517  | 0.122532 | 0.304023 | -5.56552 |
| AC016877.1  | 2.910478 | 0.546397 | 1.551254 | 0.122638 | 0.304084 | -4.45209 |
| AL954642.1  | -2.33202 | -0.82851 | -1.55135 | 0.122615 | 0.304084 | -4.55137 |
| AL359740.1  | 2.533243 | 3.913131 | 1.550552 | 0.122806 | 0.304402 | -4.5601  |
| AC005703.5  | 2.78567  | -1.73769 | 1.550212 | 0.122887 | 0.304503 | -4.43958 |
| AL358334.2  | 2.102022 | 4.097834 | 1.549704 | 0.123009 | 0.304704 | -4.59765 |
| AC003070.1  | 0.558915 | 9.274219 | 1.548928 | 0.123196 | 0.305066 | -6.0234  |
| AC127024.8  | 0.398616 | 6.568226 | 1.5486   | 0.123275 | 0.305161 | -5.5362  |
| DNM3-IT1    | 2.992409 | -0.37255 | 1.548033 | 0.123411 | 0.305297 | -4.44501 |
| AC091849.2  | -1.86488 | 1.69836  | -1.54811 | 0.123393 | 0.305297 | -4.70161 |
| EIF2AK3-DT  | 0.402958 | 6.687767 | 1.547747 | 0.12348  | 0.305367 | -5.55749 |
| AC006206.1  | 2.890624 | 2.5306   | 1.546739 | 0.123723 | 0.305767 | -4.49942 |
| AC127024.7  | 2.522824 | 5.251056 | 1.54678  | 0.123713 | 0.305767 | -4.66725 |
| AC144522.1  | 2.304161 | -2.58455 | 1.546477 | 0.123786 | 0.305822 | -4.44342 |
| AC116914.1  | 2.114785 | 5.181583 | 1.545564 | 0.124007 | 0.306185 | -4.71507 |
| AC090772.4  | 0.52873  | 9.604084 | 1.545531 | 0.124014 | 0.306185 | -6.0765  |
| AL513329.1  | 1.419135 | 5.6565   | 1.545092 | 0.124121 | 0.306346 | -4.9941  |
| AC005899.5  | -0.72233 | 5.574592 | -1.54441 | 0.124286 | 0.306655 | -5.55163 |
| AC008040.1  | -0.87386 | 1.173428 | -1.54393 | 0.124403 | 0.306842 | -4.58795 |
| AC087623.3  | -1.49231 | 2.599597 | -1.54362 | 0.124477 | 0.306925 | -4.82114 |
| LINC02181   | 1.971957 | -1.73621 | 1.542933 | 0.124644 | 0.30722  | -4.44896 |
| AC130352.1  | -0.84436 | 5.104876 | -1.54279 | 0.124679 | 0.30722  | -5.41558 |
| AL138921.2  | -0.32897 | 7.359274 | -1.54229 | 0.124799 | 0.307415 | -5.84362 |
| LINC00562   | -0.46582 | 4.926918 | -1.54208 | 0.12485  | 0.30744  | -5.27974 |
| AC026333.3  | 2.311699 | 0.893456 | 1.541601 | 0.124967 | 0.307526 | -4.4792  |
| AC131097.1  | 3.104901 | 2.669529 | 1.541754 | 0.12493  | 0.307526 | -4.50584 |
| AL365361.1  | -0.62503 | 6.37737  | -1.53938 | 0.125509 | 0.308758 | -5.70623 |
| AC084024.1  | -0.85393 | 4.919885 | -1.53896 | 0.125609 | 0.308905 | -5.35843 |
| AC073320.1  | -0.74094 | 3.590278 | -1.53871 | 0.125672 | 0.308958 | -4.91071 |
| AC112907.3  | 0.373141 | 6.551205 | 1.538265 | 0.12578  | 0.309122 | -5.54742 |
| AC026771.1  | 1.170175 | 5.498971 | 1.537617 | 0.125938 | 0.309309 | -4.96056 |
| AC090236.2  | -0.69768 | 4.897318 | -1.53777 | 0.125902 | 0.309309 | -5.30308 |
| KIRREL1-IT1 | 1.795856 | 6.017366 | 1.537188 | 0.126044 | 0.309466 | -5.06538 |
| AL021920.1  | 2.980373 | -0.69501 | 1.536816 | 0.126135 | 0.309487 | -4.45761 |
| LINC01887   | 2.930404 | -0.60907 | 1.536839 | 0.126129 | 0.309487 | -4.4578  |
| AL353795.2  | 2.710748 | 2.141385 | 1.536615 | 0.126184 | 0.309507 | -4.50797 |
| MIR200CHG   | 1.082778 | 10.19032 | 1.535997 | 0.126335 | 0.309777 | -6.08589 |
| AC010491.1  | 0.650974 | 5.349844 | 1.535775 | 0.12639  | 0.30981  | -5.113   |
| AC079777.1  | 1.744057 | 2.164978 | 1.535354 | 0.126493 | 0.309861 | -4.53042 |
| AC005776.2  | 0.300779 | 7.56354  | 1.535477 | 0.126463 | 0.309861 | -5.79304 |
| LINC01101   | 2.711814 | -0.53511 | 1.534651 | 0.126666 | 0.310182 | -4.46178 |
| AC009171.2  | 1.544152 | 6.391066 | 1.533664 | 0.126908 | 0.310473 | -5.15775 |
| AC087645.2  | 0.638495 | 5.879067 | 1.533777 | 0.126881 | 0.310473 | -5.27236 |
| AC020661.2  | -0.59763 | 6.245168 | -1.53369 | 0.126903 | 0.310473 | -5.69012 |
| AP001627.1  | -1.55362 | 1.58694  | -1.53338 | 0.126979 | 0.310544 | -4.69271 |
| LINC01337   | -1.33449 | 3.257964 | -1.53259 | 0.127173 | 0.310917 | -5.02277 |

|              |          |          |          |          |          |          |
|--------------|----------|----------|----------|----------|----------|----------|
| AC025822.2   | 2.153497 | 0.178783 | 1.531845 | 0.127357 | 0.311266 | -4.48013 |
| AC078802.1   | 0.994764 | 5.24944  | 1.531323 | 0.127486 | 0.311479 | -5.01877 |
| AC104126.1   | -2.23274 | -0.48835 | -1.52968 | 0.127892 | 0.312371 | -4.5814  |
| AC005220.1   | -2.32009 | -0.85836 | -1.52936 | 0.12797  | 0.312459 | -4.55532 |
| AC008035.1   | -0.4337  | 7.29074  | -1.52802 | 0.128304 | 0.313173 | -5.85879 |
| AC080013.3   | 1.455992 | 6.327553 | 1.527671 | 0.12839  | 0.313281 | -5.10462 |
| AL137186.1   | 2.559191 | 2.532618 | 1.527497 | 0.128433 | 0.313285 | -4.53207 |
| AC091544.7   | -2.36199 | -0.00249 | -1.52704 | 0.128546 | 0.313459 | -4.60184 |
| TRIM36-IT1   | -1.77121 | 1.499547 | -1.52671 | 0.128628 | 0.313556 | -4.6879  |
| AL358472.2   | 0.287702 | 7.214148 | 1.526042 | 0.128795 | 0.31376  | -5.74481 |
| AC008735.2   | 0.311325 | 9.494951 | 1.526134 | 0.128772 | 0.31376  | -6.11665 |
| AF127936.1   | 2.153216 | 4.486744 | 1.525491 | 0.128932 | 0.313891 | -4.66487 |
| AF127577.6   | 1.106208 | 3.772177 | 1.525574 | 0.128911 | 0.313891 | -4.70169 |
| AC233280.1   | 1.190064 | 5.220343 | 1.52437  | 0.129212 | 0.314469 | -4.96117 |
| AC006213.5   | -0.85643 | 6.574098 | -1.52333 | 0.129472 | 0.315    | -5.82407 |
| AC004009.1   | 3.574015 | -0.38062 | 1.521805 | 0.129853 | 0.315605 | -4.47587 |
| AL136366.1   | -1.72655 | 1.309582 | -1.52167 | 0.129888 | 0.315605 | -4.72444 |
| AL133373.2   | -0.90585 | 4.708203 | -1.52184 | 0.129845 | 0.315605 | -5.33185 |
| AC091868.2   | -1.02258 | 5.15056  | -1.52183 | 0.129847 | 0.315605 | -5.47919 |
| FAM83C-AS1   | 3.068389 | 4.860087 | 1.520432 | 0.130197 | 0.316228 | -4.63516 |
| UBE2D3-AS1   | -0.26058 | 7.890525 | -1.52031 | 0.130229 | 0.316228 | -5.95624 |
| AL451064.1   | 1.557531 | 5.312342 | 1.51827  | 0.130741 | 0.317369 | -4.85217 |
| AC098484.1   | -0.28426 | 8.547956 | -1.51784 | 0.13085  | 0.317531 | -6.07093 |
| NRAV         | 0.34134  | 10.20539 | 1.517429 | 0.130953 | 0.317678 | -6.23315 |
| AC020923.1   | 2.216669 | 4.369072 | 1.517019 | 0.131056 | 0.3178   | -4.65101 |
| LINC01436    | -1.14753 | 5.351052 | -1.5169  | 0.131088 | 0.3178   | -5.61827 |
| AL691482.3   | 1.33173  | 8.378305 | 1.51646  | 0.131198 | 0.317964 | -5.81521 |
| AC022400.6   | -0.26433 | 7.797916 | -1.51581 | 0.131362 | 0.318259 | -5.94686 |
| AP000355.1   | 2.834426 | -0.57522 | 1.515042 | 0.131556 | 0.318524 | -4.48471 |
| ZNF350-AS1   | -0.78433 | 4.634591 | -1.51511 | 0.131538 | 0.318524 | -5.31505 |
| AC007991.2   | 5.119253 | 3.461503 | 1.514312 | 0.131741 | 0.318869 | -4.52261 |
| LINC02651    | 2.699917 | -1.65085 | 1.512947 | 0.132087 | 0.318988 | -4.48479 |
| MYO16-AS1    | 3.551642 | 3.532916 | 1.513014 | 0.13207  | 0.318988 | -4.55399 |
| AC036176.3   | 5.899894 | 6.948817 | 1.51341  | 0.13197  | 0.318988 | -4.61721 |
| AC084876.2   | 0.761706 | 4.933897 | 1.513344 | 0.131987 | 0.318988 | -4.9835  |
| AC025280.1   | -1.58991 | 3.541231 | -1.51364 | 0.131911 | 0.318988 | -5.09027 |
| AL158825.2   | 0.360697 | 7.836363 | 1.513213 | 0.13202  | 0.318988 | -5.86501 |
| ZBTB11-AS1   | 0.392396 | 7.972907 | 1.513587 | 0.131925 | 0.318988 | -5.88967 |
| AL442128.2   | 1.142045 | 4.079591 | 1.512282 | 0.132256 | 0.319229 | -4.75446 |
| RABGAP1L-IT1 | -0.58579 | 6.632606 | -1.51222 | 0.132272 | 0.319229 | -5.79007 |
| AL096677.1   | 1.499629 | 4.272735 | 1.511943 | 0.132342 | 0.319296 | -4.75699 |
| GLIS3-AS1    | 2.56241  | 3.207034 | 1.51171  | 0.132402 | 0.319337 | -4.57548 |
| AC005722.2   | 2.155494 | 4.079834 | 1.510572 | 0.132691 | 0.31983  | -4.64399 |
| LINC00960    | 1.359967 | 6.776645 | 1.510574 | 0.132691 | 0.31983  | -5.46887 |
| AC083900.1   | 1.049114 | 5.733333 | 1.509788 | 0.132891 | 0.320106 | -5.05306 |
| AC037198.2   | -0.79157 | 6.607817 | -1.50984 | 0.132877 | 0.320106 | -5.86122 |
| AC243830.2   | 2.245478 | 3.430043 | 1.509431 | 0.132982 | 0.32012  | -4.61735 |
| AC027682.7   | -0.39132 | 4.628801 | -1.50944 | 0.132979 | 0.32012  | -5.19627 |
| AC025183.1   | 4.953461 | 3.234221 | 1.50866  | 0.133179 | 0.320492 | -4.52391 |
| AC130456.7   | -2.3202  | 0.807104 | -1.50813 | 0.133315 | 0.320613 | -4.67928 |
| AC010326.3   | -0.33715 | 10.16251 | -1.50819 | 0.133299 | 0.320613 | -6.32211 |
| PAPPA-AS2    | -1.90418 | 0.245372 | -1.50715 | 0.133566 | 0.321115 | -4.62249 |
| AL161421.1   | 0.443831 | 8.275951 | 1.506844 | 0.133644 | 0.321199 | -5.9439  |
| AC073367.1   | 0.446828 | 6.287236 | 1.506548 | 0.13372  | 0.321278 | -5.53386 |
| AL354760.1   | 0.623066 | 6.302454 | 1.505595 | 0.133964 | 0.321735 | -5.45113 |
| AC137932.3   | 0.278549 | 6.940485 | 1.505305 | 0.134039 | 0.321735 | -5.71868 |
| AC011481.3   | -0.45873 | 7.003368 | -1.50536 | 0.134026 | 0.321735 | -5.85205 |
| AC084026.3   | 2.694276 | -0.7287  | 1.504121 | 0.134343 | 0.322344 | -4.4974  |

|              |          |          |          |          |          |          |
|--------------|----------|----------|----------|----------|----------|----------|
| AC138028.2   | 0.396434 | 6.343184 | 1.503985 | 0.134378 | 0.322344 | -5.55878 |
| LINC01614    | 4.639472 | 6.46886  | 1.50322  | 0.134575 | 0.322714 | -4.66181 |
| BX293535.1   | -0.94088 | 6.603205 | -1.5027  | 0.134708 | 0.32293  | -5.86554 |
| AC021683.1   | -0.85978 | 4.177903 | -1.50197 | 0.134898 | 0.323252 | -5.30382 |
| CNNM3-DT     | 0.477633 | 7.436524 | 1.501849 | 0.134929 | 0.323252 | -5.79323 |
| AL137002.1   | -1.471   | 4.108409 | -1.50164 | 0.134982 | 0.323277 | -5.30703 |
| AC104118.1   | 0.44041  | 6.592327 | 1.500784 | 0.135204 | 0.323705 | -5.56759 |
| AC024060.1   | -0.28957 | 9.520311 | -1.50038 | 0.135308 | 0.323852 | -6.23862 |
| HOXC13-AS    | 6.016955 | 5.25409  | 1.500159 | 0.135365 | 0.323886 | -4.55837 |
| AC003681.1   | -0.24163 | 5.489432 | -1.4997  | 0.135484 | 0.324066 | -5.46417 |
| AC106786.1   | 2.016458 | 5.454528 | 1.499008 | 0.135663 | 0.324289 | -4.88882 |
| AL606834.2   | -0.40318 | 7.906925 | -1.49908 | 0.135645 | 0.324289 | -6.01614 |
| P4HA3-AS1    | 1.951137 | -0.15558 | 1.49831  | 0.135845 | 0.324619 | -4.51829 |
| AC069222.1   | 1.021663 | 3.850677 | 1.498122 | 0.135893 | 0.324632 | -4.74434 |
| AC068831.6   | 3.175609 | 5.587871 | 1.494977 | 0.136712 | 0.326483 | -4.71528 |
| AL049647.1   | -1.04279 | 3.722309 | -1.49472 | 0.13678  | 0.326542 | -5.10383 |
| AL136979.1   | -1.53843 | 1.769694 | -1.4938  | 0.13702  | 0.326947 | -4.78332 |
| AC005899.6   | -0.44948 | 7.95628  | -1.49373 | 0.137037 | 0.326947 | -6.03738 |
| AC025031.2   | 1.817959 | 4.167667 | 1.492984 | 0.137232 | 0.32731  | -4.71546 |
| AL355482.2   | -1.66805 | 2.112563 | -1.49264 | 0.137323 | 0.327423 | -4.8437  |
| AL358332.1   | 2.699866 | 3.235186 | 1.491407 | 0.137645 | 0.328087 | -4.60294 |
| CHRM3-AS1    | -1.85039 | 2.242433 | -1.49091 | 0.137776 | 0.32819  | -4.84789 |
| LINC01023    | 0.504098 | 8.703684 | 1.490956 | 0.137764 | 0.32819  | -6.02402 |
| AC079866.2   | 1.679337 | 5.125007 | 1.490595 | 0.137858 | 0.328282 | -4.83996 |
| AC135776.1   | -1.74967 | -0.45013 | -1.4903  | 0.137936 | 0.328363 | -4.61807 |
| AL359880.1   | 3.165317 | 4.401503 | 1.489709 | 0.138091 | 0.328398 | -4.63439 |
| AL512288.1   | -2.246   | 0.139561 | -1.48992 | 0.138037 | 0.328398 | -4.65149 |
| AF196972.1   | 0.829551 | 6.095645 | 1.489844 | 0.138055 | 0.328398 | -5.38019 |
| AC026691.1   | -0.46281 | 5.596304 | -1.48958 | 0.138125 | 0.328398 | -5.54845 |
| AL139317.1   | -1.91613 | 2.232093 | -1.4885  | 0.13841  | 0.328969 | -4.88569 |
| AC080013.5   | 1.837699 | 3.814794 | 1.487897 | 0.138568 | 0.329242 | -4.67559 |
| AC124276.1   | 2.404897 | 1.869118 | 1.487401 | 0.138699 | 0.329344 | -4.56414 |
| AC007191.1   | 0.343516 | 7.762105 | 1.487474 | 0.138679 | 0.329344 | -5.89916 |
| AL645608.4   | 2.974473 | -0.45713 | 1.487176 | 0.138758 | 0.329381 | -4.51823 |
| SALRNA1      | 2.171764 | 2.023176 | 1.486472 | 0.138944 | 0.329509 | -4.57578 |
| AL158071.4   | 2.276737 | 4.27237  | 1.486562 | 0.13892  | 0.329509 | -4.68154 |
| AC145207.5   | 0.413386 | 9.115776 | 1.486511 | 0.138934 | 0.329509 | -6.10685 |
| AC007952.6   | -1.47089 | 1.652575 | -1.4862  | 0.139017 | 0.329578 | -4.77941 |
| LINC02586    | 1.63707  | 4.594095 | 1.485823 | 0.139115 | 0.329708 | -4.81193 |
| AC024559.1   | 2.623985 | 2.265054 | 1.484735 | 0.139403 | 0.330286 | -4.57533 |
| AC087749.1   | -0.47911 | 6.528122 | -1.48447 | 0.139474 | 0.330349 | -5.80031 |
| AC107953.2   | 2.451294 | -1.33352 | 1.483705 | 0.139676 | 0.330724 | -4.52029 |
| AL162412.1   | 2.424298 | -0.37487 | 1.483267 | 0.139792 | 0.330895 | -4.52708 |
| AC104791.2   | 1.425508 | 3.399521 | 1.482584 | 0.139974 | 0.331144 | -4.68171 |
| AC012442.2   | -0.81213 | 5.482502 | -1.48254 | 0.139986 | 0.331144 | -5.55906 |
| AL096828.1   | 2.707218 | 0.4851   | 1.482224 | 0.140069 | 0.331238 | -4.5382  |
| AL022322.1   | 0.701542 | 8.016302 | 1.48174  | 0.140198 | 0.331438 | -5.88995 |
| AC242988.1   | 2.415136 | -0.17003 | 1.481027 | 0.140388 | 0.331782 | -4.53268 |
| LINC02562    | 1.399398 | 8.791736 | 1.479892 | 0.14069  | 0.332392 | -5.91504 |
| ADGRD1-AS1   | -2.11881 | 1.424058 | -1.47946 | 0.140805 | 0.332557 | -4.80368 |
| CACNA2D3-AS1 | -2.09281 | -1.82174 | -1.479   | 0.140928 | 0.332659 | -4.58261 |
| AL360091.3   | 2.320485 | 3.72828  | 1.478647 | 0.141023 | 0.332659 | -4.6577  |
| AC005730.2   | -1.65628 | 1.12208  | -1.47864 | 0.141025 | 0.332659 | -4.7398  |
| AC106028.4   | -0.43737 | 6.097892 | -1.47888 | 0.14096  | 0.332659 | -5.70193 |
| AC128709.2   | 3.466694 | 2.238897 | 1.477804 | 0.141248 | 0.33298  | -4.56687 |
| AC004816.2   | 2.182346 | 5.780268 | 1.477798 | 0.14125  | 0.33298  | -4.94583 |
| AC010531.5   | 0.447648 | 6.948195 | 1.477137 | 0.141427 | 0.333293 | -5.72473 |
| AC106795.5   | -1.5624  | 2.72112  | -1.47679 | 0.14152  | 0.333408 | -5.00145 |

|             |          |          |          |          |          |          |
|-------------|----------|----------|----------|----------|----------|----------|
| AC016747.3  | -0.28937 | 7.808853 | -1.47611 | 0.141701 | 0.33373  | -6.01701 |
| AC244517.6  | 2.583402 | 2.45485  | 1.475753 | 0.141798 | 0.333853 | -4.59406 |
| AC009163.3  | -0.4146  | 5.27101  | -1.47371 | 0.142347 | 0.335041 | -5.44537 |
| AL162293.1  | 1.747904 | 1.083709 | 1.473217 | 0.142479 | 0.335248 | -4.5782  |
| ZSCAN16-AS1 | -0.36243 | 8.749127 | -1.47294 | 0.142555 | 0.335321 | -6.17308 |
| AL138916.1  | 2.886483 | -0.42155 | 1.472608 | 0.142643 | 0.335331 | -4.53566 |
| AC134775.1  | -0.73312 | 5.030172 | -1.47259 | 0.142648 | 0.335331 | -5.46044 |
| AC008115.1  | 3.230188 | 2.61545  | 1.470577 | 0.143192 | 0.336082 | -4.59198 |
| AL583722.3  | -1.74743 | 1.416294 | -1.47085 | 0.143117 | 0.336082 | -4.79086 |
| AC008269.1  | -1.72273 | 1.664575 | -1.47062 | 0.14318  | 0.336082 | -4.80284 |
| AP003733.4  | 0.364072 | 7.000807 | 1.470814 | 0.143127 | 0.336082 | -5.75954 |
| AC011468.1  | -0.40916 | 7.97252  | -1.47115 | 0.143037 | 0.336082 | -6.06678 |
| AL135787.1  | -1.01105 | 5.385935 | -1.46991 | 0.143371 | 0.336399 | -5.65929 |
| AC107909.1  | 1.730699 | 4.329845 | 1.469236 | 0.143555 | 0.336618 | -4.76703 |
| AC138696.2  | 0.46933  | 8.962842 | 1.469331 | 0.143529 | 0.336618 | -6.09962 |
| AC020913.2  | 1.117312 | 4.414724 | 1.468956 | 0.14363  | 0.336691 | -4.87169 |
| AC083964.2  | -0.58305 | 4.102645 | -1.46796 | 0.143901 | 0.33722  | -5.14403 |
| NADK2-AS1   | -0.43612 | 7.062982 | -1.46678 | 0.144221 | 0.337865 | -5.92348 |
| PICART1     | 0.691711 | 5.460733 | 1.466375 | 0.144331 | 0.338017 | -5.24039 |
| AC016831.6  | 2.285971 | -1.52403 | 1.465669 | 0.144523 | 0.338362 | -4.5411  |
| AC007448.3  | 0.682051 | 5.589338 | 1.46503  | 0.144697 | 0.338664 | -5.30494 |
| AL031727.2  | 2.944497 | -1.16117 | 1.46338  | 0.145147 | 0.338757 | -4.54389 |
| LINC02163   | 7.182675 | 5.415774 | 1.463459 | 0.145126 | 0.338757 | -4.5831  |
| AC022148.2  | -2.35294 | -1.48024 | -1.46358 | 0.145093 | 0.338757 | -4.61443 |
| AP000265.1  | 1.499363 | 2.111955 | 1.46377  | 0.145041 | 0.338757 | -4.6286  |
| AL162632.3  | 1.706782 | 2.843571 | 1.463877 | 0.145012 | 0.338757 | -4.65132 |
| AL353768.1  | 2.487643 | 3.610701 | 1.464461 | 0.144852 | 0.338757 | -4.65228 |
| AF230666.2  | 1.937216 | 3.203283 | 1.463881 | 0.145011 | 0.338757 | -4.66372 |
| ACTN1-AS1   | 1.434594 | 4.526535 | 1.464286 | 0.1449   | 0.338757 | -4.83196 |
| AC068987.4  | 0.657653 | 5.370036 | 1.463232 | 0.145188 | 0.338757 | -5.20765 |
| AC018682.1  | 0.400336 | 6.320351 | 1.464124 | 0.144944 | 0.338757 | -5.59433 |
| AL035045.1  | 2.797568 | 0.268001 | 1.461859 | 0.145563 | 0.338975 | -4.55654 |
| AC126407.1  | 3.488085 | 2.408431 | 1.462332 | 0.145434 | 0.338975 | -4.58836 |
| AC003005.2  | 2.455531 | 1.98383  | 1.461464 | 0.145672 | 0.338975 | -4.60362 |
| AL136528.1  | 2.413599 | 2.242682 | 1.461137 | 0.145761 | 0.338975 | -4.60988 |
| AC020558.3  | 1.705843 | 1.865769 | 1.461859 | 0.145563 | 0.338975 | -4.6126  |
| AC009120.4  | -1.98125 | 0.739086 | -1.46148 | 0.145666 | 0.338975 | -4.72735 |
| AL049794.1  | 1.895331 | 4.310917 | 1.462305 | 0.145442 | 0.338975 | -4.75017 |
| AL136379.1  | -0.86695 | 2.669687 | -1.46232 | 0.145438 | 0.338975 | -4.89397 |
| BX649632.1  | -0.60083 | 5.037292 | -1.46108 | 0.145778 | 0.338975 | -5.45786 |
| AC022784.5  | 0.629276 | 6.26403  | 1.461585 | 0.145639 | 0.338975 | -5.48652 |
| AC074212.1  | -0.34062 | 6.205944 | -1.4614  | 0.145689 | 0.338975 | -5.73458 |
| LINC02078   | 1.410136 | 0.81152  | 1.459    | 0.146348 | 0.339966 | -4.59522 |
| AL365318.1  | 1.735875 | 3.997143 | 1.458931 | 0.146367 | 0.339966 | -4.75106 |
| AD000864.2  | 0.60755  | 4.939878 | 1.459067 | 0.146329 | 0.339966 | -5.08278 |
| AL035661.1  | -0.68065 | 10.48363 | -1.45887 | 0.146385 | 0.339966 | -6.47429 |
| AL626787.1  | -1.40851 | 3.012842 | -1.45746 | 0.146772 | 0.340654 | -4.99996 |
| AP001029.1  | -1.28266 | 5.028643 | -1.4576  | 0.146735 | 0.340654 | -5.62673 |
| AP003119.1  | 3.187491 | 2.352849 | 1.457201 | 0.146843 | 0.340714 | -4.5975  |
| LINC02177   | 1.777336 | -0.10873 | 1.456234 | 0.14711  | 0.340754 | -4.57214 |
| AP001011.1  | 1.979162 | 3.258407 | 1.456153 | 0.147132 | 0.340754 | -4.67443 |
| AC104662.1  | -1.94858 | 0.951751 | -1.4568  | 0.146954 | 0.340754 | -4.75997 |
| AL445673.1  | -1.59658 | 2.970186 | -1.4564  | 0.147064 | 0.340754 | -5.0341  |
| AC079336.7  | -0.67263 | 5.048281 | -1.45645 | 0.147051 | 0.340754 | -5.50875 |
| AL133346.1  | -0.6857  | 6.661122 | -1.45637 | 0.147073 | 0.340754 | -5.90904 |
| DGCR10      | 2.680768 | 3.339291 | 1.45551  | 0.14731  | 0.34106  | -4.65141 |
| AC018946.2  | -1.0943  | 2.439444 | -1.45457 | 0.147569 | 0.341554 | -4.84667 |
| AC104984.2  | 2.075111 | 4.48493  | 1.453833 | 0.147774 | 0.341924 | -4.79874 |



|            |          |          |          |          |          |          |
|------------|----------|----------|----------|----------|----------|----------|
| LINC01166  | -1.97797 | -1.34221 | -1.45346 | 0.147878 | 0.341953 | -4.62419 |
| AC004832.6 | 2.106452 | 2.919266 | 1.453552 | 0.147852 | 0.341953 | -4.65428 |
| DLG3-AS1   | -1.01119 | 4.477129 | -1.45301 | 0.148001 | 0.342133 | -5.45217 |
| AP003472.1 | 2.514919 | 0.115355 | 1.451858 | 0.148322 | 0.342381 | -4.57066 |
| AC023906.2 | 4.165989 | 3.779509 | 1.452047 | 0.148269 | 0.342381 | -4.62025 |
| LINC02145  | -0.86432 | 3.753092 | -1.45208 | 0.148259 | 0.342381 | -5.16105 |
| ITPR1-DT   | -0.97463 | 4.354222 | -1.45181 | 0.148334 | 0.342381 | -5.24396 |
| AP000350.6 | -1.07408 | 4.89776  | -1.45181 | 0.148336 | 0.342381 | -5.55239 |
| EXTL3-AS1  | 0.480569 | 5.389234 | 1.451294 | 0.148479 | 0.342604 | -5.28313 |
| AC012313.2 | 0.558484 | 7.242106 | 1.450487 | 0.148703 | 0.343017 | -5.81135 |
| AC092681.3 | -1.94657 | 0.427178 | -1.45032 | 0.14875  | 0.343019 | -4.72261 |
| AC007663.3 | 1.389045 | 5.002416 | 1.449888 | 0.14887  | 0.343191 | -4.92163 |
| AC026803.1 | 2.048348 | 5.937617 | 1.449378 | 0.149012 | 0.343413 | -5.01377 |
| LINC01250  | 2.18541  | -0.73903 | 1.448508 | 0.149255 | 0.343867 | -4.56598 |
| MAST4-AS1  | 0.982504 | 6.823549 | 1.44828  | 0.149318 | 0.343908 | -5.6482  |
| AC008438.1 | 0.347455 | 7.55459  | 1.448115 | 0.149365 | 0.343909 | -5.91377 |
| AC011389.3 | -2.13298 | -2.23513 | -1.44783 | 0.149444 | 0.343987 | -4.60995 |
| AC002091.1 | 1.631595 | 5.911587 | 1.447657 | 0.149492 | 0.343993 | -5.11585 |
| AL512422.1 | 2.560418 | 1.579228 | 1.446518 | 0.149811 | 0.344556 | -4.60719 |
| AC025423.1 | 0.764802 | 6.509615 | 1.446455 | 0.149829 | 0.344556 | -5.57982 |
| AC020741.1 | 2.054237 | -0.25772 | 1.445958 | 0.149968 | 0.34474  | -4.57727 |
| AL035446.1 | 4.345653 | 5.410894 | 1.445842 | 0.15     | 0.34474  | -4.68503 |
| AC138951.2 | -0.86876 | 4.430775 | -1.44512 | 0.150203 | 0.3451   | -5.34665 |
| AC005899.1 | -0.89837 | 4.534929 | -1.44483 | 0.150284 | 0.345181 | -5.43199 |
| AC007066.2 | 0.278363 | 7.207794 | 1.444502 | 0.150376 | 0.345286 | -5.85777 |
| AC009486.1 | -1.19486 | 3.705096 | -1.4439  | 0.150547 | 0.345572 | -5.15542 |
| AC017002.5 | 2.484851 | -1.03754 | 1.443058 | 0.150782 | 0.345696 | -4.56817 |
| AC105235.1 | 0.388877 | 6.924776 | 1.443326 | 0.150707 | 0.345696 | -5.77842 |
| AC013403.2 | -0.2858  | 7.43176  | -1.4435  | 0.150658 | 0.345696 | -6.00024 |
| AC004918.3 | -0.34331 | 9.401905 | -1.44305 | 0.150785 | 0.345696 | -6.3138  |
| AC131238.1 | 2.675316 | 1.852975 | 1.442768 | 0.150864 | 0.345771 | -4.61357 |
| LINC02126  | 2.495196 | -0.2457  | 1.442228 | 0.151016 | 0.345804 | -4.57556 |
| AC100803.2 | -0.60846 | 5.87293  | -1.44236 | 0.150978 | 0.345804 | -5.70473 |
| AC005070.3 | -0.28797 | 7.402773 | -1.44254 | 0.150926 | 0.345804 | -5.99206 |
| AC008115.2 | 2.970351 | 1.957522 | 1.441781 | 0.151142 | 0.345906 | -4.61478 |
| AC009065.6 | 1.60428  | 4.813309 | 1.441742 | 0.151153 | 0.345906 | -4.85047 |
| LINC00412  | -1.47587 | 3.033827 | -1.44157 | 0.151202 | 0.345913 | -5.05426 |
| THAP7-AS1  | 0.567559 | 6.893888 | 1.441172 | 0.151313 | 0.346063 | -5.74967 |
| LINC01891  | 2.809434 | 0.757693 | 1.440795 | 0.15142  | 0.346177 | -4.59004 |
| LINC00884  | 1.171398 | 6.476308 | 1.440669 | 0.151455 | 0.346177 | -5.31627 |
| AC024560.3 | 0.419295 | 8.526287 | 1.440133 | 0.151607 | 0.346418 | -6.08185 |
| AL390726.3 | 2.701493 | 2.842863 | 1.439372 | 0.151822 | 0.346804 | -4.65031 |
| AL445931.1 | -0.56267 | 5.422439 | -1.43882 | 0.151977 | 0.346947 | -5.58591 |
| AC009996.1 | -0.2587  | 7.088716 | -1.43885 | 0.151968 | 0.346947 | -5.93569 |
| LYST-AS1   | 2.559903 | 1.320167 | 1.438119 | 0.152176 | 0.347297 | -4.61057 |
| AC019118.2 | 2.318677 | 1.034783 | 1.437624 | 0.152317 | 0.347406 | -4.60808 |
| AC145098.2 | 0.531243 | 5.462833 | 1.437669 | 0.152304 | 0.347406 | -5.34002 |
| AC073878.1 | -2.2462  | -0.99941 | -1.43725 | 0.152422 | 0.347541 | -4.66243 |
| AC068870.1 | 1.207853 | 2.707705 | 1.436127 | 0.152742 | 0.348164 | -4.70353 |
| LINC02412  | -1.83455 | 0.436788 | -1.43569 | 0.152867 | 0.348344 | -4.73193 |
| KIF26B-AS1 | 1.017326 | 6.573582 | 1.435343 | 0.152965 | 0.348461 | -5.46519 |
| AL139354.1 | -2.21013 | -0.92976 | -1.43485 | 0.153105 | 0.348675 | -4.66744 |
| AC009093.6 | -0.95697 | 5.278195 | -1.43424 | 0.153279 | 0.348965 | -5.52158 |
| AC093585.1 | -1.61235 | 2.68868  | -1.43405 | 0.153333 | 0.348982 | -5.03994 |
| AC133919.2 | 1.571407 | 7.111409 | 1.433029 | 0.153624 | 0.349539 | -5.60108 |
| AC004471.1 | 0.894652 | 6.11883  | 1.431999 | 0.153918 | 0.350102 | -5.38198 |
| AL590787.1 | 2.0944   | 1.19788  | 1.431274 | 0.154125 | 0.350467 | -4.62326 |
| AL157871.5 | -0.28752 | 7.775643 | -1.43078 | 0.154266 | 0.350681 | -6.06984 |

|            |          |          |          |          |          |          |
|------------|----------|----------|----------|----------|----------|----------|
| AC010285.1 | -1.3418  | 3.253587 | -1.42963 | 0.154596 | 0.351326 | -5.10134 |
| AP003500.1 | 2.643699 | 2.573598 | 1.428901 | 0.154805 | 0.351694 | -4.65335 |
| AC124067.3 | 2.743999 | -1.38649 | 1.428222 | 0.155001 | 0.351892 | -4.58389 |
| NLGN4Y-AS1 | 2.798716 | 0.212623 | 1.428081 | 0.155041 | 0.351892 | -4.59712 |
| AC005387.2 | 0.325281 | 6.359602 | 1.428318 | 0.154973 | 0.351892 | -5.65858 |
| AC006504.1 | -0.50339 | 6.287532 | -1.42795 | 0.15508  | 0.351892 | -5.8342  |
| LINC02535  | 2.88326  | 5.508211 | 1.427781 | 0.155127 | 0.351893 | -4.82282 |
| AC087645.3 | 2.629281 | -0.84924 | 1.427537 | 0.155197 | 0.351946 | -4.58618 |
| AC023449.2 | -0.54452 | 5.136863 | -1.42673 | 0.155429 | 0.352366 | -5.51124 |
| AC010654.1 | 0.463121 | 6.75334  | 1.426535 | 0.155486 | 0.352388 | -5.72927 |
| AC023090.1 | -1.41528 | 4.493579 | -1.42536 | 0.155825 | 0.353051 | -5.45309 |
| AC008494.3 | 0.45534  | 6.033416 | 1.424682 | 0.156021 | 0.353386 | -5.54302 |
| AC012313.6 | -0.39759 | 6.108316 | -1.42395 | 0.156231 | 0.353756 | -5.77516 |
| LINC02356  | 2.284396 | 4.245428 | 1.423215 | 0.156444 | 0.35392  | -4.77034 |
| AC120498.9 | 0.65256  | 3.047739 | 1.423321 | 0.156414 | 0.35392  | -4.79809 |
| AC245100.7 | 1.003686 | 6.827996 | 1.423398 | 0.156392 | 0.35392  | -5.64886 |
| AC107926.1 | 2.795145 | -0.78979 | 1.421684 | 0.156888 | 0.354542 | -4.59266 |
| MYHAS      | 2.197447 | 0.743271 | 1.421202 | 0.157028 | 0.354542 | -4.62326 |
| AC009065.1 | 2.187012 | 1.280921 | 1.421521 | 0.156935 | 0.354542 | -4.63506 |
| Z98257.1   | 2.211234 | 3.961817 | 1.421126 | 0.15705  | 0.354542 | -4.7543  |
| AL121820.1 | -0.971   | 4.471357 | -1.42134 | 0.156987 | 0.354542 | -5.43718 |
| AC083843.3 | -0.37676 | 8.262704 | -1.42186 | 0.156836 | 0.354542 | -6.17501 |
| AC018647.2 | 0.377212 | 9.857919 | 1.421838 | 0.156843 | 0.354542 | -6.32083 |
| AC008663.1 | 3.13017  | -0.19836 | 1.420494 | 0.157233 | 0.35485  | -4.59543 |
| AC024475.1 | 2.373631 | 2.250675 | 1.420259 | 0.157302 | 0.354897 | -4.65743 |
| AC113382.2 | -1.43505 | 2.103017 | -1.42002 | 0.15737  | 0.354945 | -4.90649 |
| AC145676.1 | -0.67013 | 3.790562 | -1.41938 | 0.157559 | 0.355264 | -5.21147 |
| AL034405.1 | 2.413289 | 3.394789 | 1.418779 | 0.157732 | 0.355548 | -4.69927 |
| AP005019.1 | 0.942324 | 5.829075 | 1.418282 | 0.157877 | 0.35567  | -5.3061  |
| AC009318.4 | -0.45916 | 6.693554 | -1.41827 | 0.157881 | 0.35567  | -5.91446 |
| NCF4-AS1   | 2.367926 | -0.7704  | 1.418099 | 0.157931 | 0.355675 | -4.59853 |
| AL353801.1 | -1.7301  | 1.908657 | -1.41728 | 0.15817  | 0.356107 | -4.88416 |
| AL392048.1 | 2.446103 | 0.82215  | 1.417088 | 0.158225 | 0.356118 | -4.62639 |
| AL589843.1 | -1.02504 | 6.134228 | -1.41694 | 0.15827  | 0.356118 | -5.89775 |
| AP001178.1 | 2.84698  | 2.869316 | 1.416179 | 0.158491 | 0.356509 | -4.67168 |
| AC015971.1 | -0.37147 | 6.106026 | -1.41545 | 0.158703 | 0.35688  | -5.77461 |
| LINC00492  | 2.889272 | 0.018937 | 1.415123 | 0.1588   | 0.35699  | -4.60583 |
| AC090774.2 | 2.606716 | -1.39448 | 1.414182 | 0.159075 | 0.357076 | -4.59985 |
| LINC02067  | -1.11971 | 1.700291 | -1.41469 | 0.158925 | 0.357076 | -4.82786 |
| AL358075.1 | -0.93263 | 4.185586 | -1.41427 | 0.15905  | 0.357076 | -5.35757 |
| AL512413.1 | 0.960991 | 7.512159 | 1.414504 | 0.158981 | 0.357076 | -5.81739 |
| AC002467.1 | 0.383482 | 8.287479 | 1.414423 | 0.159005 | 0.357076 | -6.08598 |
| MCCC1-AS1  | 0.417726 | 7.496484 | 1.413137 | 0.159382 | 0.357657 | -5.95147 |
| STAM-AS1   | 0.423689 | 5.018796 | 1.411832 | 0.159765 | 0.358411 | -5.1937  |
| RAD21-AS1  | -0.40596 | 4.666864 | -1.41157 | 0.159842 | 0.358475 | -5.35343 |
| AL449106.1 | 0.699313 | 5.219175 | 1.411197 | 0.159952 | 0.358615 | -5.25214 |
| AC012555.1 | -1.02376 | 3.606545 | -1.41079 | 0.160073 | 0.358779 | -5.24192 |
| AC004707.1 | -0.87283 | 4.877706 | -1.4105  | 0.160157 | 0.358861 | -5.46926 |
| AL021328.1 | -0.50626 | 5.763577 | -1.41031 | 0.160214 | 0.358862 | -5.75434 |
| AC132872.4 | 0.327672 | 6.99723  | 1.410175 | 0.160253 | 0.358862 | -5.85624 |
| AC005578.1 | 1.935675 | 1.753943 | 1.409174 | 0.160549 | 0.359337 | -4.66493 |
| SAPCD1-AS1 | -1.26997 | 4.093908 | -1.40913 | 0.160561 | 0.359337 | -5.27174 |
| AC004264.1 | 1.623517 | 6.192118 | 1.408871 | 0.160638 | 0.359402 | -5.29692 |
| AC005550.2 | 2.839704 | 3.01285  | 1.408546 | 0.160734 | 0.35951  | -4.68779 |
| AC096741.1 | -1.29451 | 3.567781 | -1.40834 | 0.160794 | 0.359534 | -5.20992 |
| AC007773.1 | 0.719617 | 6.45839  | 1.408187 | 0.16084  | 0.359534 | -5.61273 |
| AP002761.1 | 4.074376 | 4.752025 | 1.407938 | 0.160914 | 0.359591 | -4.70952 |
| AC004596.1 | 0.414614 | 7.658173 | 1.407432 | 0.161064 | 0.359819 | -5.98151 |

|             |          |          |          |          |          |          |
|-------------|----------|----------|----------|----------|----------|----------|
| AL390067.1  | 2.170402 | 3.996483 | 1.406973 | 0.161199 | 0.35989  | -4.76984 |
| AC008080.1  | -1.72001 | 0.663504 | -1.40662 | 0.161303 | 0.35989  | -4.78456 |
| AC009120.5  | -0.59759 | 4.249275 | -1.40667 | 0.161288 | 0.35989  | -5.25048 |
| AC027682.4  | -0.28659 | 6.07583  | -1.40707 | 0.161172 | 0.35989  | -5.77302 |
| AC136475.2  | 0.551006 | 7.460379 | 1.406389 | 0.161372 | 0.35989  | -5.93757 |
| AC010319.4  | 0.279127 | 7.647173 | 1.406353 | 0.161383 | 0.35989  | -5.99659 |
| SAMSN1-AS1  | 2.348898 | 0.459399 | 1.405813 | 0.161543 | 0.360056 | -4.6329  |
| AC007938.3  | 0.709854 | 7.085847 | 1.405779 | 0.161553 | 0.360056 | -5.79672 |
| AC011603.2  | 0.464281 | 4.670749 | 1.405138 | 0.161743 | 0.360373 | -5.11679 |
| AC120042.2  | 2.439754 | 1.904245 | 1.404747 | 0.161859 | 0.360418 | -4.6658  |
| AL162741.1  | 0.603395 | 4.825553 | 1.404898 | 0.161815 | 0.360418 | -5.16179 |
| AC067930.3  | 1.353793 | 7.256744 | 1.40438  | 0.161968 | 0.360554 | -5.6338  |
| AC016866.3  | 3.254884 | 6.374375 | 1.404056 | 0.162065 | 0.360661 | -4.93546 |
| AC023154.1  | 0.896456 | 1.89066  | 1.403857 | 0.162124 | 0.360686 | -4.70902 |
| AL355312.4  | 0.941476 | 8.985926 | 1.403585 | 0.162205 | 0.360759 | -6.13877 |
| AC136475.1  | 0.484586 | 5.719029 | 1.403228 | 0.162311 | 0.360889 | -5.45845 |
| LIPC-AS1    | 2.02187  | -0.12257 | 1.402644 | 0.162485 | 0.360955 | -4.63006 |
| AL008727.1  | -0.54337 | 3.252903 | -1.40268 | 0.162474 | 0.360955 | -5.0339  |
| AC005253.1  | 0.228562 | 7.594173 | 1.402824 | 0.162431 | 0.360955 | -6.00433 |
| LINC01067   | 2.488303 | -0.98639 | 1.402446 | 0.162544 | 0.360979 | -4.61408 |
| AC246817.1  | -2.012   | 0.769137 | -1.40123 | 0.162908 | 0.361573 | -4.81021 |
| AL590133.1  | 1.137701 | 6.135059 | 1.40133  | 0.162877 | 0.361573 | -5.39269 |
| EPN2-AS1    | 0.384849 | 6.178963 | 1.400352 | 0.163169 | 0.362046 | -5.63425 |
| AC092849.2  | 1.923028 | 4.624221 | 1.399598 | 0.163394 | 0.362439 | -4.86544 |
| LINC02227   | -1.51881 | -0.28178 | -1.39889 | 0.163607 | 0.362804 | -4.71685 |
| AC007610.1  | 2.368309 | 1.28699  | 1.398387 | 0.163757 | 0.363029 | -4.65922 |
| AP001198.1  | -1.89693 | -2.17173 | -1.39805 | 0.163859 | 0.363148 | -4.66353 |
| AP000697.1  | -1.28406 | 6.160372 | -1.39683 | 0.164225 | 0.363852 | -5.97938 |
| AC018809.1  | -0.37424 | 6.582251 | -1.39609 | 0.164447 | 0.364166 | -5.90219 |
| AC009318.2  | -0.2759  | 8.102264 | -1.39603 | 0.164464 | 0.364166 | -6.17256 |
| AC013553.3  | 2.110018 | 3.732334 | 1.395857 | 0.164516 | 0.364175 | -4.77416 |
| LINC00996   | 0.979681 | 5.156784 | 1.395572 | 0.164602 | 0.364258 | -5.0766  |
| AC093821.1  | -2.11505 | -0.21141 | -1.39525 | 0.164698 | 0.364362 | -4.74814 |
| AC009271.1  | 4.299157 | 4.24669  | 1.394528 | 0.164916 | 0.364739 | -4.70058 |
| ATXN2-AS    | 0.897577 | 5.996067 | 1.394319 | 0.164979 | 0.364771 | -5.32838 |
| AL049629.1  | -0.89159 | 5.816667 | -1.39384 | 0.165124 | 0.364983 | -5.82966 |
| AC098818.2  | 1.595925 | 1.786007 | 1.393454 | 0.16524  | 0.365132 | -4.69595 |
| AC132938.1  | 2.39683  | 2.70512  | 1.393126 | 0.165339 | 0.365244 | -4.70889 |
| AC131902.1  | 2.706636 | 0.522848 | 1.392954 | 0.165391 | 0.365251 | -4.64301 |
| AP000894.4  | 0.531527 | 7.645141 | 1.391306 | 0.165889 | 0.366243 | -5.9766  |
| LINC01990   | -1.22831 | 2.170683 | -1.39079 | 0.166044 | 0.366477 | -4.93134 |
| AC245041.1  | 6.055877 | 8.611905 | 1.390439 | 0.166152 | 0.3665   | -4.92725 |
| AC007485.2  | -0.23291 | 9.553489 | -1.39049 | 0.166137 | 0.3665   | -6.38998 |
| AC132192.1  | 0.646167 | 6.947503 | 1.390006 | 0.166283 | 0.366682 | -5.80008 |
| ARRDC1-AS1  | 0.281878 | 9.71031  | 1.389555 | 0.16642  | 0.366875 | -6.34985 |
| AC011477.3  | -0.99097 | 7.569595 | -1.38935 | 0.166482 | 0.366906 | -6.1985  |
| AC018716.2  | 2.683705 | -0.16512 | 1.388187 | 0.166835 | 0.367491 | -4.63565 |
| AC016747.2  | -0.71467 | 4.687642 | -1.38815 | 0.166846 | 0.367491 | -5.46932 |
| LINC00323   | -1.02187 | 2.770371 | -1.38741 | 0.167071 | 0.36788  | -5.06794 |
| LINC02065   | 2.63354  | 1.659921 | 1.387132 | 0.167156 | 0.367959 | -4.67559 |
| AC068473.3  | 1.439595 | 3.420659 | 1.386593 | 0.16732  | 0.368212 | -4.81033 |
| LINC01807   | 3.797932 | 1.755661 | 1.386152 | 0.167454 | 0.368356 | -4.65541 |
| AC022762.1  | 2.353125 | 1.405746 | 1.386056 | 0.167484 | 0.368356 | -4.67651 |
| AL020995.1  | -0.44852 | 4.882146 | -1.38509 | 0.167777 | 0.368878 | -5.45706 |
| AC010973.1  | -0.55591 | 5.697639 | -1.3848  | 0.167868 | 0.368878 | -5.76438 |
| ZKSCAN7-AS1 | -0.57513 | 6.319743 | -1.38488 | 0.167841 | 0.368878 | -5.91771 |
| AC104596.1  | -0.73129 | 4.478555 | -1.38449 | 0.167963 | 0.368978 | -5.43742 |
| AL359091.4  | 0.52416  | 6.576823 | 1.383429 | 0.168286 | 0.36958  | -5.73643 |

|             |          |          |          |          |          |          |
|-------------|----------|----------|----------|----------|----------|----------|
| LINC01994   | 2.47547  | -1.09993 | 1.382845 | 0.168465 | 0.369756 | -4.63544 |
| AC063965.1  | -0.44751 | 6.745687 | -1.38289 | 0.168452 | 0.369756 | -5.98492 |
| AC008278.1  | 2.45816  | 1.321765 | 1.382387 | 0.168605 | 0.369956 | -4.67564 |
| TCF7L1-IT1  | 2.74346  | -0.4023  | 1.381921 | 0.168748 | 0.370054 | -4.6393  |
| AC117503.4  | -0.24397 | 7.453725 | -1.38207 | 0.168702 | 0.370054 | -6.07809 |
| AC078962.3  | -1.47943 | 2.858496 | -1.38079 | 0.169096 | 0.370709 | -5.08508 |
| AP000238.1  | 2.166003 | 5.049605 | 1.3799   | 0.169368 | 0.370971 | -4.89609 |
| AP000253.1  | 0.485516 | 5.062527 | 1.379753 | 0.169413 | 0.370971 | -5.25526 |
| TSPEAR-AS2  | 1.290912 | 6.651602 | 1.379889 | 0.169372 | 0.370971 | -5.54282 |
| AL023653.1  | -0.76578 | 5.464982 | -1.37975 | 0.169413 | 0.370971 | -5.76119 |
| AL157373.2  | 1.660894 | 4.282422 | 1.37943  | 0.169513 | 0.371081 | -4.90806 |
| AC022601.1  | -2.18998 | -1.26125 | -1.37908 | 0.169621 | 0.37121  | -4.72058 |
| AC011377.1  | -2.01346 | 0.923914 | -1.37851 | 0.169796 | 0.371485 | -4.85631 |
| AL645939.4  | 2.785922 | 1.046791 | 1.37784  | 0.170003 | 0.371828 | -4.66776 |
| AL157871.2  | 0.531366 | 7.792726 | 1.377663 | 0.170057 | 0.371839 | -6.02087 |
| AC104564.4  | 2.791843 | -0.46523 | 1.377112 | 0.170227 | 0.372103 | -4.64388 |
| AGAP1-IT1   | -0.65958 | 6.453627 | -1.37671 | 0.170352 | 0.372266 | -5.93785 |
| AC007687.1  | 2.722173 | 1.886947 | 1.37634  | 0.170466 | 0.37235  | -4.69334 |
| CRIM1-DT    | 0.463232 | 8.659255 | 1.376263 | 0.170489 | 0.37235  | -6.19281 |
| AC023790.2  | -0.57231 | 4.138154 | -1.37498 | 0.170886 | 0.373094 | -5.24144 |
| AC019131.2  | -0.34047 | 7.532991 | -1.37484 | 0.170929 | 0.373094 | -6.12721 |
| PPP1R26-AS1 | 0.474185 | 7.052096 | 1.374302 | 0.171096 | 0.37335  | -5.87542 |
| AC110792.3  | -0.48021 | 7.366856 | -1.37402 | 0.171183 | 0.373431 | -6.11958 |
| AL121603.2  | 0.300252 | 8.603669 | 1.373729 | 0.171273 | 0.37352  | -6.21033 |
| AC005540.1  | 0.913117 | 5.947977 | 1.373317 | 0.171401 | 0.373582 | -5.41641 |
| AC087392.5  | -0.56729 | 6.401659 | -1.37342 | 0.171369 | 0.373582 | -5.9311  |
| AL031600.2  | 2.507829 | 1.622088 | 1.371969 | 0.17182  | 0.374386 | -4.69392 |
| AL139300.2  | 1.375246 | 4.239923 | 1.370958 | 0.172134 | 0.374668 | -4.91023 |
| AP001363.2  | 1.968073 | 5.250565 | 1.371089 | 0.172093 | 0.374668 | -5.04093 |
| AC233300.1  | -0.48431 | 6.396924 | -1.37091 | 0.172149 | 0.374668 | -5.93096 |
| LINC01963   | -0.39591 | 8.663492 | -1.3712  | 0.172059 | 0.374668 | -6.30897 |
| AL359979.2  | 2.513869 | 0.240615 | 1.370047 | 0.172418 | 0.375145 | -4.66568 |
| AC025171.5  | 0.704568 | 6.215322 | 1.369381 | 0.172626 | 0.375379 | -5.62069 |
| MNX1-AS2    | -1.33353 | 4.993235 | -1.3694  | 0.172618 | 0.375379 | -5.69081 |
| LINC01730   | 0.875037 | 6.578205 | 1.368973 | 0.172753 | 0.375547 | -5.62687 |
| AC026979.1  | 1.486623 | 4.725858 | 1.368577 | 0.172876 | 0.375707 | -4.96651 |
| LINC01180   | 2.052585 | -0.95888 | 1.367679 | 0.173157 | 0.376208 | -4.65524 |
| AC010280.1  | 3.460964 | 1.100037 | 1.36661  | 0.173491 | 0.376717 | -4.66968 |
| AC068669.1  | 0.626881 | 4.212543 | 1.366639 | 0.173482 | 0.376717 | -5.04616 |
| AC009133.2  | 2.465039 | -1.17946 | 1.365614 | 0.173803 | 0.377263 | -4.65406 |
| AC060766.7  | 0.51758  | 7.441449 | 1.365487 | 0.173843 | 0.377263 | -5.96091 |
| DOCK9-AS1   | -1.49891 | 2.295635 | -1.36488 | 0.174035 | 0.377461 | -5.0468  |
| AC004477.1  | 0.472311 | 5.583467 | 1.364957 | 0.174009 | 0.377461 | -5.43242 |
| AC036214.2  | 0.354615 | 7.797922 | 1.364574 | 0.17413  | 0.377557 | -6.0712  |
| AC073111.1  | 2.138047 | 3.53952  | 1.364059 | 0.174291 | 0.377799 | -4.79289 |
| AC012146.3  | 2.500747 | 2.382747 | 1.363704 | 0.174403 | 0.377861 | -4.72658 |
| RNF217-AS1  | -0.92789 | 4.189991 | -1.36317 | 0.174572 | 0.377861 | -5.42615 |
| AL365181.2  | 1.450604 | 7.275624 | 1.36328  | 0.174536 | 0.377861 | -5.71214 |
| AL133243.3  | 0.223037 | 7.58133  | 1.36321  | 0.174558 | 0.377861 | -6.0608  |
| AC009495.3  | -0.53414 | 7.134404 | -1.36344 | 0.174485 | 0.377861 | -6.08403 |
| AC107308.1  | 4.194601 | 4.651038 | 1.36182  | 0.174996 | 0.378561 | -4.74966 |
| AC132938.2  | 1.131021 | 4.541684 | 1.361927 | 0.174962 | 0.378561 | -5.01167 |
| AL606489.1  | -0.90407 | 8.105202 | -1.36142 | 0.175122 | 0.378726 | -6.30609 |
| LINC02594   | 2.411519 | 1.08941  | 1.361004 | 0.175253 | 0.378812 | -4.69408 |
| AC105339.2  | 0.334687 | 5.058912 | 1.360973 | 0.175263 | 0.378812 | -5.32754 |
| AC034102.5  | 1.83225  | 3.515024 | 1.360586 | 0.175385 | 0.378966 | -4.81323 |
| AC104117.5  | -1.99273 | -0.40185 | -1.36034 | 0.175462 | 0.379024 | -4.78194 |
| AC007785.1  | 6.116632 | 5.717132 | 1.360006 | 0.175568 | 0.379035 | -4.73929 |

|            |          |          |          |          |          |          |
|------------|----------|----------|----------|----------|----------|----------|
| AL590648.3 | 2.14828  | 3.28312  | 1.36011  | 0.175535 | 0.379035 | -4.78366 |
| AC006538.3 | -2.10918 | -0.74717 | -1.35977 | 0.175642 | 0.379086 | -4.76384 |
| AC022034.1 | -0.65895 | 7.550715 | -1.35798 | 0.176209 | 0.380201 | -6.18166 |
| LINC01740  | 2.674712 | -0.7094  | 1.356779 | 0.17659  | 0.380395 | -4.66517 |
| AC008972.2 | 0.505381 | 6.892574 | 1.356892 | 0.176554 | 0.380395 | -5.89474 |
| AC091231.1 | -0.50411 | 6.554113 | -1.35674 | 0.176601 | 0.380395 | -5.95897 |
| AC108860.2 | 0.48869  | 7.731184 | 1.356737 | 0.176603 | 0.380395 | -6.03146 |
| SNHG22     | -0.34549 | 7.081436 | -1.35681 | 0.176581 | 0.380395 | -6.07195 |
| AL139287.1 | 0.276644 | 10.19661 | 1.356789 | 0.176586 | 0.380395 | -6.47012 |
| AL137058.3 | 1.863495 | -1.7944  | 1.356078 | 0.176812 | 0.380737 | -4.66359 |
| AC138207.1 | 2.021078 | 3.673636 | 1.355777 | 0.176908 | 0.380749 | -4.82142 |
| AL034349.1 | 2.068243 | 4.115505 | 1.355741 | 0.176919 | 0.380749 | -4.84304 |
| AL356272.1 | 2.35286  | -1.45314 | 1.354505 | 0.177312 | 0.380886 | -4.66557 |
| AC114489.1 | 3.384759 | 3.746934 | 1.354505 | 0.177312 | 0.380886 | -4.75649 |
| AP000442.1 | -0.9984  | 3.682404 | -1.35533 | 0.17705  | 0.380886 | -5.24976 |
| MEIS1-AS2  | -0.50517 | 4.392718 | -1.35462 | 0.177277 | 0.380886 | -5.37103 |
| AF127577.4 | 0.442852 | 7.013337 | 1.354425 | 0.177338 | 0.380886 | -5.90098 |
| AC034231.1 | 0.567192 | 8.181412 | 1.355004 | 0.177153 | 0.380886 | -6.11965 |
| AC004148.2 | -0.23816 | 8.5198   | -1.35495 | 0.177172 | 0.380886 | -6.29076 |
| LINC01564  | 4.683672 | 5.50921  | 1.354008 | 0.17747  | 0.38102  | -4.78022 |
| AC008687.3 | 3.018925 | 4.820063 | 1.35391  | 0.177502 | 0.38102  | -4.85963 |
| AC112503.2 | -0.79339 | 5.128003 | -1.35334 | 0.177683 | 0.381191 | -5.68785 |
| AC104695.4 | 0.736279 | 7.756722 | 1.353416 | 0.177659 | 0.381191 | -6.0209  |
| AC139099.1 | 1.875463 | -0.59692 | 1.352459 | 0.177964 | 0.38125  | -4.68113 |
| AC010904.2 | 2.175298 | 1.94213  | 1.352603 | 0.177918 | 0.38125  | -4.73275 |
| AL138831.1 | 2.572115 | 4.340903 | 1.352662 | 0.177899 | 0.38125  | -4.85785 |
| AC012157.1 | 0.68424  | 5.426512 | 1.352773 | 0.177864 | 0.38125  | -5.2755  |
| AL137127.1 | 0.294114 | 5.795395 | 1.352594 | 0.177921 | 0.38125  | -5.63555 |
| MAP3K2-DT  | 0.562991 | 6.734469 | 1.352183 | 0.178052 | 0.381317 | -5.76698 |
| DDN-AS1    | -0.29275 | 6.53172  | -1.35204 | 0.178097 | 0.381317 | -5.93637 |
| LINC00691  | 1.521013 | 0.294243 | 1.350887 | 0.178466 | 0.381999 | -4.70516 |
| AC097641.1 | 2.312791 | 0.818318 | 1.350374 | 0.17863  | 0.382241 | -4.70212 |
| AC013264.1 | 2.620379 | 0.695186 | 1.350161 | 0.178698 | 0.382278 | -4.69421 |
| LINC02269  | 2.795935 | -0.13374 | 1.349586 | 0.178883 | 0.38241  | -4.677   |
| AC090912.3 | 2.911966 | 5.824888 | 1.349781 | 0.17882  | 0.38241  | -4.94382 |
| AC013476.1 | 0.88499  | 5.472298 | 1.349175 | 0.179014 | 0.38241  | -5.22784 |
| AC008985.1 | -0.27789 | 5.430155 | -1.34925 | 0.178992 | 0.38241  | -5.64979 |
| AC126118.1 | -0.47942 | 6.030596 | -1.34943 | 0.178931 | 0.38241  | -5.88014 |
| AC010883.1 | 0.298247 | 7.584656 | 1.348745 | 0.179152 | 0.382595 | -6.06811 |
| AL021068.1 | -0.41257 | 7.278701 | -1.34834 | 0.179282 | 0.382764 | -6.11466 |
| AC254629.1 | 3.313026 | 4.038143 | 1.347307 | 0.179614 | 0.38282  | -4.78226 |
| AL645608.1 | 1.711082 | 4.826742 | 1.347481 | 0.179558 | 0.38282  | -5.03817 |
| AC007014.1 | -0.78699 | 4.28225  | -1.34776 | 0.179468 | 0.38282  | -5.4276  |
| AC106886.3 | -0.85769 | 4.19607  | -1.34781 | 0.179451 | 0.38282  | -5.43401 |
| COA6-AS1   | 0.492261 | 8.664115 | 1.348093 | 0.179361 | 0.38282  | -6.21887 |
| LINC01003  | 0.357677 | 9.192304 | 1.347361 | 0.179597 | 0.38282  | -6.32607 |
| CNOT10-AS1 | 2.198342 | 3.415454 | 1.346566 | 0.179852 | 0.382878 | -4.80897 |
| AC018737.2 | -1.47048 | 0.996904 | -1.34623 | 0.17996  | 0.382878 | -4.85652 |
| AC009716.2 | -1.03375 | 1.333656 | -1.34627 | 0.179949 | 0.382878 | -4.86175 |
| AC093864.1 | -0.80861 | 3.967342 | -1.34645 | 0.179889 | 0.382878 | -5.36121 |
| AC091053.2 | -0.54945 | 5.757126 | -1.34629 | 0.179941 | 0.382878 | -5.78633 |
| SH3RF3-AS1 | 0.527544 | 7.258328 | 1.345953 | 0.180049 | 0.382878 | -5.96862 |
| AL683813.1 | -0.26193 | 6.85197  | -1.34706 | 0.179693 | 0.382878 | -6.02087 |
| AC113143.1 | 0.679856 | 7.797893 | 1.346009 | 0.180031 | 0.382878 | -6.04408 |
| AC005726.2 | -0.36108 | 5.676904 | -1.34537 | 0.180236 | 0.383167 | -5.69296 |
| AC090116.1 | 2.754177 | -0.82593 | 1.344827 | 0.180412 | 0.383216 | -4.67719 |
| AL158211.3 | 2.800291 | 0.77306  | 1.34497  | 0.180366 | 0.383216 | -4.6994  |
| AC005225.3 | 2.458527 | 2.345099 | 1.344873 | 0.180397 | 0.383216 | -4.74619 |

|              |          |          |          |          |          |          |
|--------------|----------|----------|----------|----------|----------|----------|
| AP001434.1   | -1.43452 | 3.843348 | -1.34415 | 0.180631 | 0.383573 | -5.42912 |
| USP27X-AS1   | -0.339   | 6.608039 | -1.34386 | 0.180725 | 0.383664 | -5.99363 |
| AL049612.1   | 2.392844 | 2.343897 | 1.341701 | 0.181422 | 0.385035 | -4.75272 |
| AF064860.2   | 2.185672 | 0.046875 | 1.341118 | 0.181611 | 0.385218 | -4.69912 |
| AC008735.4   | -0.28955 | 7.350508 | -1.34115 | 0.1816   | 0.385218 | -6.12868 |
| AL049646.2   | 2.459426 | 3.704557 | 1.340631 | 0.181768 | 0.385444 | -4.83354 |
| AC011389.2   | -1.74243 | 2.260354 | -1.3404  | 0.181844 | 0.385496 | -5.05388 |
| AC009041.1   | 2.186111 | -0.71375 | 1.339527 | 0.182127 | 0.385768 | -4.68683 |
| AP000943.1   | 2.727705 | 2.659247 | 1.339531 | 0.182125 | 0.385768 | -4.7544  |
| AL449983.1   | -2.14376 | -0.60647 | -1.33977 | 0.182049 | 0.385768 | -4.79621 |
| AL162376.1   | 3.322281 | 1.725593 | 1.338984 | 0.182303 | 0.385815 | -4.71709 |
| AL121970.1   | 2.423791 | 1.154339 | 1.339202 | 0.182232 | 0.385815 | -4.71937 |
| AL031733.2   | -0.68761 | 3.606076 | -1.33912 | 0.182257 | 0.385815 | -5.19265 |
| AC023983.2   | 2.384111 | 2.322079 | 1.338758 | 0.182377 | 0.385862 | -4.75433 |
| AL022328.1   | -0.26368 | 8.546215 | -1.33833 | 0.182514 | 0.386044 | -6.31796 |
| AL022329.1   | 2.263098 | -1.3367  | 1.337583 | 0.182759 | 0.386344 | -4.68404 |
| AC002094.4   | -0.82254 | 5.632604 | -1.33759 | 0.182755 | 0.386344 | -5.89785 |
| AC008267.5   | 0.410515 | 8.923864 | 1.336746 | 0.183032 | 0.386812 | -6.28574 |
| AP003170.4   | -0.4255  | 5.494827 | -1.33611 | 0.183237 | 0.387137 | -5.70917 |
| AC011476.2   | -0.65783 | 4.67792  | -1.33537 | 0.18348  | 0.387441 | -5.51644 |
| AC008737.1   | -0.60509 | 6.812307 | -1.33536 | 0.183484 | 0.387441 | -6.08962 |
| AC005076.1   | 0.489084 | 7.069842 | 1.334811 | 0.183663 | 0.387709 | -5.93649 |
| AL449423.1   | 2.709035 | 1.198902 | 1.334188 | 0.183867 | 0.387916 | -4.72218 |
| AC009108.5   | 1.601712 | 1.962124 | 1.333308 | 0.184154 | 0.387916 | -4.76707 |
| AC080075.1   | 2.127264 | 2.98552  | 1.333088 | 0.184226 | 0.387916 | -4.80076 |
| AP001178.3   | 0.944462 | 4.061242 | 1.33325  | 0.184173 | 0.387916 | -4.99278 |
| AC073130.3   | 0.460941 | 4.984572 | 1.332934 | 0.184277 | 0.387916 | -5.36506 |
| AC078778.1   | 0.680347 | 6.022561 | 1.333255 | 0.184172 | 0.387916 | -5.56852 |
| AL008723.2   | -0.95955 | 4.461053 | -1.33306 | 0.184237 | 0.387916 | -5.6009  |
| LINC00638    | 0.465763 | 6.92695  | 1.334224 | 0.183855 | 0.387916 | -5.92201 |
| AP001062.1   | -0.3188  | 6.759991 | -1.33298 | 0.18426  | 0.387916 | -6.03341 |
| TRAPPC12-AS1 | -0.32176 | 8.095731 | -1.33366 | 0.184038 | 0.387916 | -6.25525 |
| VCAN-AS1     | 2.227208 | 1.27257  | 1.332206 | 0.184515 | 0.387972 | -4.73482 |
| AC007529.1   | -1.65082 | 0.580479 | -1.33235 | 0.184468 | 0.387972 | -4.85278 |
| AP001020.2   | 0.79491  | 4.869692 | 1.332536 | 0.184407 | 0.387972 | -5.14201 |
| LINC02560    | 3.590249 | 7.53797  | 1.332077 | 0.184558 | 0.387972 | -5.28058 |
| AL136295.2   | 0.333108 | 6.634053 | 1.332065 | 0.184562 | 0.387972 | -5.84531 |
| AC105114.1   | 1.938014 | -2.31997 | 1.331495 | 0.184749 | 0.388132 | -4.68854 |
| CERNA3       | 2.328511 | 0.878352 | 1.331169 | 0.184856 | 0.388132 | -4.72457 |
| AC005695.3   | 2.735916 | 3.182268 | 1.330889 | 0.184948 | 0.388132 | -4.78799 |
| Z82217.1     | -0.3715  | 4.030498 | -1.33156 | 0.184727 | 0.388132 | -5.23542 |
| AC107214.1   | 0.364373 | 7.11238  | 1.331011 | 0.184907 | 0.388132 | -5.97377 |
| AC009495.1   | -0.74635 | 6.308336 | -1.33109 | 0.18488  | 0.388132 | -6.0084  |
| AC010735.1   | 2.125798 | 2.965927 | 1.330652 | 0.185025 | 0.388187 | -4.79495 |
| AL078621.3   | -0.33921 | 6.569169 | -1.33014 | 0.185194 | 0.388432 | -6.01035 |
| AC073896.5   | -2.0281  | -1.27789 | -1.32987 | 0.185284 | 0.388511 | -4.77025 |
| AL031282.2   | -0.26656 | 7.32417  | -1.32955 | 0.185388 | 0.388622 | -6.13334 |
| AC243654.1   | 2.361967 | 3.889891 | 1.329021 | 0.185562 | 0.38866  | -4.84678 |
| AC026412.3   | 0.515862 | 6.074346 | 1.329052 | 0.185551 | 0.38866  | -5.65697 |
| AC008760.1   | 0.310148 | 7.860803 | 1.32922  | 0.185496 | 0.38866  | -6.14461 |
| AC133065.1   | 2.275126 | 2.134041 | 1.328633 | 0.18569  | 0.38882  | -4.76275 |
| AC093484.1   | -1.82049 | 0.782175 | -1.32637 | 0.186438 | 0.390278 | -4.9062  |
| AC079600.3   | 2.631487 | 0.53467  | 1.326025 | 0.18655  | 0.390404 | -4.7158  |
| LINC00626    | 2.625783 | 0.718634 | 1.324887 | 0.186927 | 0.391083 | -4.72091 |
| AC099487.1   | 3.353796 | 2.287149 | 1.324054 | 0.187203 | 0.391552 | -4.74523 |
| LINC02204    | 1.285927 | 2.12107  | 1.323005 | 0.187551 | 0.391843 | -4.79504 |
| LINC02280    | -0.85393 | 2.785825 | -1.3234  | 0.187421 | 0.391843 | -5.06437 |
| AC034236.2   | 0.319885 | 6.830111 | 1.323083 | 0.187524 | 0.391843 | -5.93785 |

|              |          |          |          |          |          |          |
|--------------|----------|----------|----------|----------|----------|----------|
| AC005261.1   | 0.232851 | 11.53311 | 1.323192 | 0.187488 | 0.391843 | -6.71579 |
| AC133540.1   | -1.26931 | 2.210092 | -1.32272 | 0.187643 | 0.391928 | -5.01187 |
| AC093001.1   | 2.713628 | 1.906076 | 1.322485 | 0.187723 | 0.391938 | -4.75059 |
| AC027271.1   | -0.67993 | 5.373936 | -1.3224  | 0.187753 | 0.391938 | -5.76412 |
| AC131235.3   | 1.016228 | 5.549957 | 1.322034 | 0.187873 | 0.391972 | -5.27684 |
| AC073349.1   | -1.07988 | 3.564505 | -1.32208 | 0.187856 | 0.391972 | -5.42186 |
| AC005154.4   | -0.52168 | 6.735785 | -1.32169 | 0.187988 | 0.392103 | -6.0694  |
| AC107027.3   | -0.34305 | 7.852401 | -1.32059 | 0.188353 | 0.392755 | -6.24518 |
| AL133215.1   | -0.78605 | 6.173114 | -1.31897 | 0.188893 | 0.393772 | -5.99529 |
| AL356134.1   | 2.705238 | 0.221032 | 1.318798 | 0.188951 | 0.393782 | -4.71736 |
| LINC00885    | 3.954931 | 5.871797 | 1.318251 | 0.189133 | 0.394053 | -4.89229 |
| PANDAR       | 1.964873 | -0.43746 | 1.317213 | 0.18948  | 0.394667 | -4.71898 |
| PTCSC3       | 2.470288 | -1.14559 | 1.316212 | 0.189815 | 0.395101 | -4.7068  |
| SLC25A30-AS1 | -0.90455 | 4.340295 | -1.31607 | 0.189861 | 0.395101 | -5.37815 |
| AC080038.2   | 0.962951 | 5.222731 | 1.315961 | 0.189899 | 0.395101 | -5.40086 |
| AC008870.5   | -1.66392 | 5.074371 | -1.31627 | 0.189796 | 0.395101 | -5.72666 |
| AC092611.1   | 0.449447 | 5.16719  | 1.315559 | 0.190034 | 0.395272 | -5.41327 |
| AC124067.4   | 3.224503 | 3.678667 | 1.313847 | 0.190608 | 0.396248 | -4.80996 |
| AP000648.3   | 0.305549 | 8.059263 | 1.313942 | 0.190576 | 0.396248 | -6.19335 |
| AL137244.1   | 0.486172 | 6.147043 | 1.313258 | 0.190806 | 0.396549 | -5.71305 |
| AC009292.1   | 2.062072 | -0.81929 | 1.312709 | 0.190991 | 0.396659 | -4.71552 |
| AC008592.1   | 2.187701 | -0.55259 | 1.312606 | 0.191025 | 0.396659 | -4.71733 |
| AC008897.2   | 2.250658 | 1.272312 | 1.312552 | 0.191044 | 0.396659 | -4.7554  |
| AC147067.2   | -0.93159 | 6.350796 | -1.3124  | 0.191095 | 0.396659 | -6.08906 |
| AC120349.1   | -0.35673 | 7.351117 | -1.31232 | 0.191123 | 0.396659 | -6.17638 |
| FAM66E       | 1.794412 | -1.59226 | 1.311395 | 0.191433 | 0.396844 | -4.71196 |
| AC011455.1   | 2.075877 | 1.847681 | 1.311267 | 0.191476 | 0.396844 | -4.77806 |
| AL035425.1   | -2.13344 | -0.95951 | -1.31157 | 0.191374 | 0.396844 | -4.80358 |
| TESC-AS1     | -1.58712 | 1.397025 | -1.31165 | 0.191347 | 0.396844 | -4.92576 |
| AC004846.2   | 0.38385  | 6.53983  | 1.311475 | 0.191406 | 0.396844 | -5.85588 |
| ANKRD44-IT1  | -0.59168 | 5.497133 | -1.31003 | 0.191892 | 0.397597 | -5.80459 |
| AP003774.4   | 1.138124 | 5.062816 | 1.309526 | 0.192064 | 0.397842 | -5.20976 |
| AC004696.2   | -2.16476 | -0.63238 | -1.30919 | 0.192177 | 0.397967 | -4.82534 |
| AJ011932.1   | 2.451289 | 1.733174 | 1.308547 | 0.192394 | 0.398308 | -4.76654 |
| AL359693.1   | 1.923412 | -2.25239 | 1.308388 | 0.192448 | 0.39831  | -4.71288 |
| AC007952.2   | 1.46972  | 1.987723 | 1.308146 | 0.19253  | 0.398369 | -4.8049  |
| AC022916.1   | 0.360114 | 6.56036  | 1.307844 | 0.192632 | 0.398471 | -5.87861 |
| LINC01181    | 2.654885 | -0.63098 | 1.307123 | 0.192877 | 0.398757 | -4.7181  |
| AC007298.1   | 1.524399 | 3.758945 | 1.307192 | 0.192853 | 0.398757 | -4.91483 |
| AL022324.3   | 2.394405 | 0.217747 | 1.306925 | 0.192944 | 0.398785 | -4.73485 |
| LINC01971    | 2.136914 | 0.946817 | 1.305834 | 0.193314 | 0.39944  | -4.75792 |
| AC116351.2   | 1.339181 | 4.153775 | 1.305272 | 0.193504 | 0.399725 | -5.0144  |
| SMG6-IT1     | 2.299501 | 1.486284 | 1.304839 | 0.193652 | 0.399895 | -4.76945 |
| AC078881.1   | -0.47821 | 5.219733 | -1.30458 | 0.193738 | 0.399895 | -5.70029 |
| AC090425.2   | 0.295864 | 7.537459 | 1.30456  | 0.193746 | 0.399895 | -6.12858 |
| AC009948.4   | -0.84941 | 2.124052 | -1.30435 | 0.193818 | 0.399932 | -4.98425 |
| AP000320.1   | 2.452936 | -0.96128 | 1.30398  | 0.193944 | 0.399979 | -4.7202  |
| AC083949.1   | 1.124467 | 4.46025  | 1.30397  | 0.193947 | 0.399979 | -5.06048 |
| AL731533.2   | 1.233451 | 5.105696 | 1.303205 | 0.194207 | 0.400406 | -5.22979 |
| AP001120.2   | 2.43879  | 0.391526 | 1.302592 | 0.194416 | 0.400617 | -4.74299 |
| AC079360.1   | 2.31336  | 2.599475 | 1.302695 | 0.194381 | 0.400617 | -4.80973 |
| AC013452.2   | 1.839623 | 2.952069 | 1.302015 | 0.194613 | 0.400901 | -4.84383 |
| AC127496.1   | 0.710232 | 3.659754 | 1.301875 | 0.194661 | 0.400901 | -5.01461 |
| AC011921.1   | 0.620787 | 5.779545 | 1.301114 | 0.194921 | 0.401326 | -5.43315 |
| AC090186.1   | 1.167198 | 5.558562 | 1.299682 | 0.19541  | 0.402224 | -5.20883 |
| AC007493.2   | 2.561015 | -0.4218  | 1.298841 | 0.195698 | 0.402706 | -4.72961 |
| AL592424.1   | 1.03321  | 3.889841 | 1.298458 | 0.195829 | 0.402866 | -5.02182 |
| AC011483.2   | 2.452412 | 0.097768 | 1.297518 | 0.196151 | 0.40305  | -4.74162 |

|             |          |          |          |          |          |          |
|-------------|----------|----------|----------|----------|----------|----------|
| AC105118.1  | 2.618229 | 3.562937 | 1.297462 | 0.196171 | 0.40305  | -4.84278 |
| ZSWIM8-AS1  | -0.47885 | 3.786759 | -1.29741 | 0.196187 | 0.40305  | -5.27833 |
| AC006449.3  | 1.097519 | 5.46615  | 1.297419 | 0.196185 | 0.40305  | -5.3345  |
| AP003392.6  | 0.893829 | 5.903605 | 1.298028 | 0.195976 | 0.40305  | -5.52101 |
| AC007391.1  | 2.299773 | -0.23253 | 1.296642 | 0.196452 | 0.403153 | -4.73945 |
| AC112504.1  | -0.4588  | 4.125935 | -1.29707 | 0.196304 | 0.403153 | -5.33673 |
| AC025165.4  | -0.35983 | 6.659833 | -1.29671 | 0.196429 | 0.403153 | -6.07099 |
| AC000123.3  | -0.28437 | 7.760744 | -1.29692 | 0.196358 | 0.403153 | -6.25176 |
| AC004817.4  | 1.501587 | 0.763663 | 1.294784 | 0.197091 | 0.403914 | -4.7769  |
| AC072061.1  | 0.295454 | 6.08251  | 1.294894 | 0.197053 | 0.403914 | -5.77894 |
| AC103810.5  | -0.69122 | 5.284038 | -1.29515 | 0.196966 | 0.403914 | -5.79147 |
| AC005005.3  | 0.409273 | 7.005029 | 1.294863 | 0.197064 | 0.403914 | -5.99324 |
| SEC62-AS1   | -0.6279  | 6.778496 | -1.2953  | 0.196913 | 0.403914 | -6.14092 |
| AC002398.2  | -1.87712 | -0.0018  | -1.29392 | 0.197388 | 0.404089 | -4.90138 |
| AC007683.2  | -0.96286 | 3.903147 | -1.29409 | 0.197331 | 0.404089 | -5.42989 |
| AC027607.1  | -0.4733  | 6.860252 | -1.29416 | 0.197306 | 0.404089 | -6.11043 |
| AC079174.1  | -0.47081 | 7.082097 | -1.29391 | 0.197392 | 0.404089 | -6.15737 |
| AL139246.2  | 1.848575 | 3.79943  | 1.293143 | 0.197657 | 0.404301 | -4.92603 |
| AC012313.10 | 0.840199 | 5.672034 | 1.29344  | 0.197554 | 0.404301 | -5.50179 |
| AL163051.2  | -0.23202 | 8.836664 | -1.29329 | 0.197605 | 0.404301 | -6.41501 |
| AL138899.1  | -1.26665 | 1.85156  | -1.29261 | 0.197842 | 0.404568 | -5.00038 |
| BTBD9-AS1   | -0.66737 | 6.481572 | -1.29199 | 0.198054 | 0.404892 | -6.09788 |
| AC145146.1  | 2.537421 | 0.930335 | 1.291579 | 0.198197 | 0.404979 | -4.76282 |
| AC093525.4  | -0.86654 | 4.737813 | -1.29156 | 0.198204 | 0.404979 | -5.69744 |
| AC243829.2  | 2.412686 | -0.84679 | 1.291387 | 0.198263 | 0.40499  | -4.7343  |
| AC080188.2  | 0.641537 | 6.685371 | 1.290867 | 0.198443 | 0.405247 | -5.88681 |
| AC073896.4  | 0.278346 | 10.05419 | 1.290688 | 0.198505 | 0.405263 | -6.52947 |
| AC091925.2  | 2.578475 | 0.382589 | 1.290289 | 0.198643 | 0.405435 | -4.7524  |
| AC008395.1  | 1.437796 | 5.3499   | 1.289874 | 0.198787 | 0.405619 | -5.136   |
| LINC01945   | -1.93624 | -1.28896 | -1.28902 | 0.199084 | 0.406004 | -4.81084 |
| RNF157-AS1  | 1.115316 | 5.222995 | 1.289133 | 0.199044 | 0.406004 | -5.34136 |
| HMBX01-IT1  | -0.81026 | 5.40695  | -1.28835 | 0.199317 | 0.406369 | -5.88276 |
| AL356414.1  | 2.308959 | -1.20343 | 1.288004 | 0.199436 | 0.406439 | -4.73608 |
| C11orf72    | 0.753256 | 3.303138 | 1.287779 | 0.199514 | 0.406439 | -4.9757  |
| AP003071.4  | -0.68759 | 5.452852 | -1.2878  | 0.199507 | 0.406439 | -5.86227 |
| LPP-AS1     | -2.00078 | -1.04552 | -1.28759 | 0.199579 | 0.406462 | -4.82544 |
| AC100814.1  | 0.338423 | 8.545998 | 1.28742  | 0.199639 | 0.406473 | -6.3046  |
| CASC18      | 1.496023 | 2.234746 | 1.286448 | 0.199977 | 0.407051 | -4.8359  |
| AC027807.2  | -1.89026 | 1.074376 | -1.2858  | 0.200203 | 0.407401 | -4.94976 |
| AC007406.5  | -0.24433 | 9.431537 | -1.28557 | 0.200283 | 0.407454 | -6.51428 |
| AC099794.1  | 2.340295 | -0.0937  | 1.285262 | 0.20039  | 0.407561 | -4.75307 |
| AP005328.2  | 2.5971   | -0.90882 | 1.284068 | 0.200806 | 0.407605 | -4.7406  |
| AC034223.2  | 2.992359 | 0.810873 | 1.284099 | 0.200795 | 0.407605 | -4.76162 |
| AC007879.1  | 2.277746 | 0.829299 | 1.284362 | 0.200704 | 0.407605 | -4.77381 |
| DDR1-DT     | 1.30496  | 0.702981 | 1.283955 | 0.200846 | 0.407605 | -4.79342 |
| AC087203.3  | -1.69673 | 0.101604 | -1.28434 | 0.200713 | 0.407605 | -4.87729 |
| USP12-AS1   | 2.474224 | 4.32671  | 1.284679 | 0.200593 | 0.407605 | -4.91704 |
| AC026333.4  | 0.63876  | 6.128249 | 1.284649 | 0.200603 | 0.407605 | -5.71243 |
| U73166.1    | -0.44722 | 5.979708 | -1.28464 | 0.200607 | 0.407605 | -5.93304 |
| AC078925.4  | -1.69426 | 1.984857 | -1.28357 | 0.200981 | 0.407768 | -5.08928 |
| AL158198.1  | -2.02549 | -0.44541 | -1.2822  | 0.201461 | 0.408468 | -4.85548 |
| AL158834.2  | 0.89259  | 4.547047 | 1.282295 | 0.201426 | 0.408468 | -5.14419 |
| AC011374.2  | -0.32831 | 7.837765 | -1.28212 | 0.201489 | 0.408468 | -6.28801 |
| SEPSECS-AS1 | -0.33164 | 6.53257  | -1.28144 | 0.201726 | 0.408839 | -6.02937 |
| AL772363.1  | 1.792485 | -2.38669 | 1.280639 | 0.202006 | 0.409297 | -4.74121 |
| AC069503.3  | 2.784368 | -0.47303 | 1.280221 | 0.202153 | 0.409316 | -4.74655 |
| AC020634.1  | 2.14624  | 2.347415 | 1.280425 | 0.202081 | 0.409316 | -4.82543 |
| LINC02324   | -1.68097 | 0.383958 | -1.28014 | 0.202179 | 0.409316 | -4.89321 |



|             |          |          |          |          |          |          |
|-------------|----------|----------|----------|----------|----------|----------|
| AL122008.3  | -1.999   | -0.84554 | -1.27913 | 0.202537 | 0.409774 | -4.83919 |
| AP005060.1  | -1.60446 | -0.38464 | -1.27883 | 0.202642 | 0.409774 | -4.84753 |
| LINC00330   | -1.40736 | 1.966968 | -1.27872 | 0.202678 | 0.409774 | -5.09109 |
| AL139274.2  | -0.29786 | 5.080376 | -1.2791  | 0.202545 | 0.409774 | -5.63485 |
| AC007342.8  | 1.242488 | 8.302483 | 1.278961 | 0.202595 | 0.409774 | -6.09204 |
| AC079336.1  | 1.838266 | 4.785639 | 1.277828 | 0.202993 | 0.410301 | -5.0603  |
| AC008655.2  | 2.170694 | 4.046526 | 1.277492 | 0.203112 | 0.41043  | -4.92057 |
| AP003393.1  | 1.164993 | 1.044789 | 1.276675 | 0.203399 | 0.410642 | -4.8143  |
| IL20RB-AS1  | 2.983162 | 4.643709 | 1.277023 | 0.203277 | 0.410642 | -4.91808 |
| AP001525.1  | -1.26495 | 3.428115 | -1.27657 | 0.203435 | 0.410642 | -5.32619 |
| AC002553.1  | -0.26209 | 8.925588 | -1.27668 | 0.203399 | 0.410642 | -6.45101 |
| AC073957.1  | 2.695225 | 3.325844 | 1.276301 | 0.203531 | 0.410725 | -4.85088 |
| AC108865.1  | 2.616255 | 2.429055 | 1.275439 | 0.203835 | 0.411118 | -4.82003 |
| AL034428.1  | 1.557064 | 1.723833 | 1.275444 | 0.203833 | 0.411118 | -4.82595 |
| LINC01998   | 2.125358 | -1.77933 | 1.274378 | 0.20421  | 0.411763 | -4.74863 |
| AL035420.2  | 2.069657 | 2.021308 | 1.273307 | 0.204589 | 0.412416 | -4.82583 |
| AL391095.3  | 1.103254 | 5.005941 | 1.273122 | 0.204654 | 0.412437 | -5.2627  |
| AC092919.2  | 0.886188 | 6.691771 | 1.272    | 0.205052 | 0.413057 | -5.80028 |
| AL391422.4  | 0.414619 | 8.462999 | 1.271943 | 0.205072 | 0.413057 | -6.30521 |
| AP004609.3  | -0.2845  | 6.711329 | -1.27159 | 0.205198 | 0.413202 | -6.08839 |
| LINC01754   | -1.78517 | 0.360096 | -1.27055 | 0.205565 | 0.413607 | -4.92094 |
| AD001527.1  | -0.31186 | 8.278381 | -1.27069 | 0.205515 | 0.413607 | -6.37305 |
| URB1-AS1    | 0.362845 | 9.590409 | 1.270791 | 0.205481 | 0.413607 | -6.48345 |
| AL049840.1  | -0.25382 | 9.536798 | -1.27021 | 0.205687 | 0.413742 | -6.55193 |
| AC009303.3  | 2.096922 | 0.271081 | 1.267777 | 0.206553 | 0.415261 | -4.78216 |
| AC007000.3  | 0.911807 | 5.15238  | 1.267809 | 0.206541 | 0.415261 | -5.38204 |
| AC024243.1  | 1.596853 | 3.036121 | 1.265647 | 0.207313 | 0.416456 | -4.9002  |
| AC092755.1  | 4.405975 | 6.545431 | 1.265645 | 0.207313 | 0.416456 | -4.97991 |
| AL033543.1  | -0.3971  | 3.379763 | -1.26593 | 0.207212 | 0.416456 | -5.16501 |
| AC005332.3  | -0.28268 | 9.103482 | -1.2654  | 0.2074   | 0.416519 | -6.49839 |
| AL157832.2  | -1.65067 | -1.72639 | -1.26486 | 0.207595 | 0.416757 | -4.81519 |
| AL158166.1  | 1.220642 | 7.042283 | 1.264761 | 0.20763  | 0.416757 | -5.82625 |
| AC104316.2  | 2.377259 | 0.035198 | 1.263626 | 0.208036 | 0.417279 | -4.77579 |
| AC104462.1  | 2.373392 | 2.658622 | 1.263546 | 0.208065 | 0.417279 | -4.84554 |
| LINC01031   | 1.675333 | 2.543888 | 1.263442 | 0.208102 | 0.417279 | -4.86945 |
| ITCH-AS1    | 2.085646 | 3.763121 | 1.263415 | 0.208112 | 0.417279 | -4.93126 |
| DANT2       | -0.78536 | 6.19521  | -1.26314 | 0.20821  | 0.417365 | -6.07845 |
| AC009097.4  | 1.650974 | 3.916775 | 1.262559 | 0.208418 | 0.417559 | -4.97624 |
| AC100763.1  | -1.28415 | 2.667463 | -1.26259 | 0.208408 | 0.417559 | -5.1662  |
| AL355512.1  | 2.221803 | 3.376873 | 1.262225 | 0.208538 | 0.417577 | -4.89018 |
| AP001271.2  | 1.287619 | 4.375614 | 1.262249 | 0.20853  | 0.417577 | -5.04357 |
| AC109454.2  | -0.28469 | 7.078044 | -1.26193 | 0.208643 | 0.417674 | -6.16685 |
| AC011446.1  | 0.524994 | 6.837089 | 1.261588 | 0.208767 | 0.417812 | -5.96503 |
| UFL1-AS1    | 2.21791  | 1.588991 | 1.261081 | 0.208949 | 0.417994 | -4.82092 |
| AC135782.1  | -1.27502 | 2.593619 | -1.26096 | 0.208992 | 0.417994 | -5.13455 |
| AC011933.4  | -0.60254 | 5.145855 | -1.26087 | 0.209025 | 0.417994 | -5.75674 |
| AC084871.2  | 1.511013 | 4.5772   | 1.259978 | 0.209346 | 0.418525 | -5.05657 |
| LINC01800   | 1.787989 | -0.31577 | 1.259744 | 0.20943  | 0.418582 | -4.78317 |
| AC096536.2  | 0.457479 | 7.234195 | 1.259386 | 0.209559 | 0.418728 | -6.08687 |
| AL356441.1  | 2.308123 | -1.18891 | 1.258992 | 0.209701 | 0.418831 | -4.76565 |
| AL034550.2  | 1.44213  | 1.874043 | 1.258933 | 0.209722 | 0.418831 | -4.84913 |
| AC005519.1  | 0.264444 | 7.659456 | 1.258075 | 0.210032 | 0.419338 | -6.20022 |
| AL390774.2  | 1.98445  | 1.496598 | 1.257545 | 0.210223 | 0.419608 | -4.82725 |
| ZNF385D-AS1 | 2.255564 | -1.20327 | 1.256781 | 0.210499 | 0.419713 | -4.76808 |
| AC097478.3  | 2.234997 | -0.57207 | 1.2571   | 0.210384 | 0.419713 | -4.77476 |
| AL591368.1  | -1.27339 | 1.836396 | -1.25686 | 0.210469 | 0.419713 | -5.02968 |
| AL024508.1  | -0.31201 | 7.245863 | -1.25703 | 0.210409 | 0.419713 | -6.20788 |
| LSINCT5     | -1.66572 | -1.28353 | -1.25508 | 0.211114 | 0.420478 | -4.83773 |

|            |          |          |          |          |          |          |
|------------|----------|----------|----------|----------|----------|----------|
| BX649601.1 | 1.516384 | 4.21682  | 1.255363 | 0.211012 | 0.420478 | -5.02172 |
| AC007785.3 | 1.203895 | 4.433014 | 1.255422 | 0.21099  | 0.420478 | -5.13364 |
| AC012645.4 | -0.36275 | 6.040093 | -1.25524 | 0.211055 | 0.420478 | -5.96018 |
| AC087301.1 | -0.4791  | 6.256493 | -1.25495 | 0.211162 | 0.420478 | -6.0456  |
| AL357140.2 | 0.32781  | 7.398541 | 1.254381 | 0.211367 | 0.420775 | -6.14226 |
| ODF2-AS1   | 0.318979 | 7.233039 | 1.253947 | 0.211525 | 0.420976 | -6.11664 |
| AC132938.3 | 0.325611 | 8.66462  | 1.253318 | 0.211753 | 0.421319 | -6.36423 |
| KCNQ1-AS1  | -1.81639 | -0.75914 | -1.25297 | 0.211879 | 0.421457 | -4.86358 |
| LINC01940  | 1.859786 | -1.45498 | 1.252322 | 0.212115 | 0.421815 | -4.77239 |
| AC009570.1 | 0.5064   | 6.501274 | 1.252155 | 0.212175 | 0.421824 | -5.91141 |
| AC023886.1 | 2.171536 | -0.63168 | 1.250996 | 0.212597 | 0.422017 | -4.77983 |
| AL139095.4 | 0.562662 | 5.874115 | 1.251568 | 0.212389 | 0.422017 | -5.66236 |
| AC104170.1 | -0.74574 | 6.024661 | -1.25066 | 0.212721 | 0.422017 | -6.03802 |
| AC053527.1 | -0.34304 | 6.34971  | -1.25153 | 0.212402 | 0.422017 | -6.04452 |
| AC026979.3 | -0.42663 | 6.464476 | -1.25079 | 0.212671 | 0.422017 | -6.09393 |
| AL132712.2 | 1.043641 | 8.144098 | 1.250653 | 0.212722 | 0.422017 | -6.12302 |
| AC002350.1 | 0.223589 | 7.619563 | 1.251112 | 0.212554 | 0.422017 | -6.21388 |
| AC108134.1 | -0.48025 | 7.538079 | -1.25092 | 0.212624 | 0.422017 | -6.29511 |
| AC105760.1 | 1.728465 | -0.43542 | 1.250188 | 0.212891 | 0.422019 | -4.79168 |
| AL133320.1 | -1.6582  | -1.58772 | -1.25021 | 0.212882 | 0.422019 | -4.83406 |
| AC087623.1 | -0.82477 | 5.646342 | -1.25047 | 0.212787 | 0.422019 | -5.98199 |
| AC008736.2 | -0.36893 | 8.134282 | -1.24994 | 0.21298  | 0.422084 | -6.38231 |
| AC020763.1 | 1.862844 | 3.074429 | 1.249343 | 0.213199 | 0.422184 | -4.90498 |
| AC061999.1 | 2.213471 | 5.990961 | 1.249349 | 0.213197 | 0.422184 | -5.22359 |
| AL353804.1 | -0.4835  | 7.773341 | -1.24952 | 0.213133 | 0.422184 | -6.34186 |
| LINC01215  | 1.437382 | 3.756591 | 1.248856 | 0.213377 | 0.422424 | -5.00978 |
| AP002768.1 | -1.84702 | 1.545026 | -1.24786 | 0.213739 | 0.422998 | -5.08092 |
| AP001610.1 | 0.752188 | 5.981464 | 1.247754 | 0.213779 | 0.422998 | -5.69976 |
| AC005920.3 | -1.762   | -1.00983 | -1.24699 | 0.214057 | 0.423122 | -4.85963 |
| FAM215B    | -0.44306 | 4.87981  | -1.24697 | 0.214067 | 0.423122 | -5.59809 |
| AC007823.1 | 0.42961  | 6.332995 | 1.247247 | 0.213964 | 0.423122 | -5.84673 |
| AP000442.2 | 0.249392 | 8.10399  | 1.247202 | 0.213981 | 0.423122 | -6.29515 |
| AC115618.2 | 0.27952  | 11.18034 | 1.246622 | 0.214193 | 0.42326  | -6.75679 |
| AC087392.2 | -0.74579 | 5.246982 | -1.24625 | 0.214329 | 0.423417 | -5.84194 |
| AC078922.1 | 2.444686 | 1.771947 | 1.245153 | 0.214731 | 0.4241   | -4.8358  |
| BICRA-AS1  | -0.57089 | 5.763334 | -1.24477 | 0.214871 | 0.424153 | -5.95972 |
| AC009690.2 | 0.232088 | 6.840359 | 1.244873 | 0.214834 | 0.424153 | -6.05092 |
| AP001458.1 | 2.07102  | 6.576127 | 1.244549 | 0.214953 | 0.424203 | -5.46435 |
| AC023830.2 | 1.740488 | -0.10074 | 1.243938 | 0.215177 | 0.424534 | -4.80458 |
| WASHC5-AS1 | 0.534034 | 6.761159 | 1.243352 | 0.215392 | 0.424844 | -5.97263 |
| AC106897.1 | -0.8309  | 5.77785  | -1.2432  | 0.215448 | 0.424844 | -6.00759 |
| AL513218.1 | 0.313908 | 7.169478 | 1.24247  | 0.215716 | 0.424941 | -6.10676 |
| AC244093.4 | 0.294672 | 7.417438 | 1.242453 | 0.215723 | 0.424941 | -6.17656 |
| AC092953.2 | -0.32776 | 8.360804 | -1.24258 | 0.215675 | 0.424941 | -6.41905 |
| AC009779.2 | -0.28437 | 9.163349 | -1.2425  | 0.215704 | 0.424941 | -6.53117 |
| TMEM92-AS1 | -0.55563 | 6.976861 | -1.24205 | 0.215869 | 0.425118 | -6.21316 |
| AP001790.1 | 2.042481 | 2.52135  | 1.241819 | 0.215956 | 0.425177 | -4.87754 |
| AL121906.2 | -0.49449 | 6.65126  | -1.24164 | 0.216021 | 0.425194 | -6.13963 |
| LINC00536  | 1.964555 | 0.074436 | 1.240982 | 0.216264 | 0.425339 | -4.80746 |
| AC008906.2 | -0.81132 | 4.504314 | -1.24107 | 0.216231 | 0.425339 | -5.52208 |
| AC091271.1 | 0.396483 | 7.852183 | 1.241084 | 0.216227 | 0.425339 | -6.23618 |
| AC021016.3 | -0.35327 | 6.682835 | -1.23994 | 0.216648 | 0.425982 | -6.12719 |
| AL590399.1 | 1.713695 | -1.10695 | 1.239735 | 0.216724 | 0.42602  | -4.79076 |
| AC093849.1 | -1.40519 | 0.583788 | -1.23909 | 0.216962 | 0.426376 | -4.93586 |
| LINC02325  | 1.831043 | 0.039354 | 1.238922 | 0.217024 | 0.426387 | -4.81073 |
| AC008649.1 | 2.572279 | 2.591411 | 1.237321 | 0.217616 | 0.427439 | -4.86465 |
| AP003064.2 | -1.9209  | -0.29429 | -1.23702 | 0.21773  | 0.427549 | -4.91209 |
| LINC01771  | 2.118541 | 3.173667 | 1.236517 | 0.217914 | 0.427688 | -4.91357 |

|             |          |          |          |          |          |          |
|-------------|----------|----------|----------|----------|----------|----------|
| AC090948.2  | -0.33859 | 7.141502 | -1.23658 | 0.21789  | 0.427688 | -6.2283  |
| AP004782.1  | -1.65631 | -1.85208 | -1.23497 | 0.218488 | 0.42859  | -4.84214 |
| AC027279.3  | -2.06863 | 0.593547 | -1.23502 | 0.218469 | 0.42859  | -4.99475 |
| AC006435.4  | 2.404016 | -0.92143 | 1.234633 | 0.218613 | 0.428612 | -4.79099 |
| LINC01238   | -0.57806 | 4.843603 | -1.23476 | 0.218567 | 0.428612 | -5.69939 |
| KBTBD11-OT1 | -1.90551 | 0.717984 | -1.23397 | 0.21886  | 0.428984 | -4.99095 |
| AC119868.2  | -2.01578 | -1.57912 | -1.23379 | 0.218925 | 0.428999 | -4.86137 |
| AC091152.2  | 0.355623 | 4.206162 | 1.233555 | 0.219014 | 0.429062 | -5.27278 |
| LINC01926   | 2.300411 | -1.04572 | 1.232376 | 0.219453 | 0.429698 | -4.79286 |
| AC024592.2  | 1.575206 | 6.11053  | 1.232377 | 0.219452 | 0.429698 | -5.57951 |
| AL121768.2  | 1.593999 | 0.351226 | 1.231907 | 0.219628 | 0.42991  | -4.82995 |
| ITPKB-AS1   | -1.69982 | 0.35354  | -1.23147 | 0.21979  | 0.42991  | -4.95174 |
| MED4-AS1    | 0.298654 | 6.540326 | 1.231622 | 0.219734 | 0.42991  | -5.98005 |
| ATP2B1-AS1  | 0.341332 | 6.779205 | 1.231483 | 0.219786 | 0.42991  | -6.04607 |
| HOXB-AS4    | 5.606401 | 5.975447 | 1.231307 | 0.219851 | 0.429918 | -4.90485 |
| AL138902.1  | 1.473788 | 4.975646 | 1.230947 | 0.219986 | 0.430068 | -5.22344 |
| AP001029.2  | 0.463382 | 4.404382 | 1.230187 | 0.220269 | 0.430399 | -5.27445 |
| AC020978.7  | -0.20206 | 6.030252 | -1.23027 | 0.220239 | 0.430399 | -5.96332 |
| AL050327.1  | 2.3062   | -1.28405 | 1.229993 | 0.220342 | 0.430428 | -4.79394 |
| AL450326.1  | -0.30313 | 7.96231  | -1.22866 | 0.22084  | 0.431289 | -6.36628 |
| LINC01289   | 1.931927 | -1.47374 | 1.228242 | 0.220997 | 0.431375 | -4.79593 |
| ADARB2-AS1  | 2.250736 | 0.254242 | 1.228083 | 0.221056 | 0.431375 | -4.81889 |
| AL355488.1  | 0.306628 | 8.865295 | 1.228146 | 0.221033 | 0.431375 | -6.42631 |
| AC025183.2  | 2.264654 | -0.32176 | 1.227453 | 0.221292 | 0.431723 | -4.80701 |
| AC006206.2  | 4.202199 | 5.517362 | 1.226674 | 0.221584 | 0.432181 | -4.96345 |
| AP003071.1  | -1.30529 | 2.396696 | -1.22644 | 0.221674 | 0.432243 | -5.22557 |
| AC026304.1  | 0.878409 | 6.028738 | 1.225756 | 0.221929 | 0.432516 | -5.69993 |
| AL136368.1  | -0.45556 | 6.482825 | -1.2259  | 0.221875 | 0.432516 | -6.13265 |
| LINC01629   | 2.870591 | 3.707838 | 1.225268 | 0.222112 | 0.432761 | -4.91628 |
| AC004817.2  | 2.304975 | -0.95949 | 1.224712 | 0.222321 | 0.432855 | -4.80083 |
| AL590723.1  | 0.336058 | 6.897622 | 1.22468  | 0.222333 | 0.432855 | -6.07522 |
| AC011472.1  | -0.26569 | 8.380797 | -1.22479 | 0.222291 | 0.432855 | -6.4378  |
| AL499616.1  | -1.37257 | 0.175219 | -1.22413 | 0.22254  | 0.433145 | -4.92778 |
| AL589739.1  | 2.266324 | -0.14434 | 1.223322 | 0.222844 | 0.4334   | -4.81418 |
| AC073342.1  | 1.916349 | 1.121121 | 1.22317  | 0.222901 | 0.4334   | -4.85039 |
| AC006369.1  | -1.65444 | 1.460811 | -1.22349 | 0.222782 | 0.4334   | -5.05652 |
| AC103691.1  | 0.506363 | 8.811687 | 1.22317  | 0.222901 | 0.4334   | -6.3947  |
| LINC00970   | -1.61825 | 0.811482 | -1.22248 | 0.22316  | 0.433791 | -4.98621 |
| AC093915.1  | 1.948094 | -1.64324 | 1.222295 | 0.223231 | 0.433816 | -4.80095 |
| AC122713.2  | -1.24013 | 0.636026 | -1.22133 | 0.223595 | 0.434412 | -4.95295 |
| AC022613.1  | -0.85854 | 6.340974 | -1.22059 | 0.223874 | 0.434841 | -6.13391 |
| AL591848.2  | -1.12229 | 4.183357 | -1.22034 | 0.223968 | 0.434912 | -5.55434 |
| AC004706.1  | 1.109245 | 6.349196 | 1.219653 | 0.224229 | 0.435158 | -5.73475 |
| AL121772.1  | 0.673475 | 7.244049 | 1.219547 | 0.224269 | 0.435158 | -6.06378 |
| AC232271.1  | 0.258017 | 7.410958 | 1.21965  | 0.22423  | 0.435158 | -6.21092 |
| LINC02292   | 2.003841 | -1.77202 | 1.218892 | 0.224517 | 0.435489 | -4.80384 |
| AC099314.1  | 1.549656 | 5.016043 | 1.21879  | 0.224555 | 0.435489 | -5.15491 |
| AP000487.2  | 1.509267 | 5.901988 | 1.218591 | 0.224631 | 0.435523 | -5.50183 |
| AL159166.1  | 2.433178 | -0.91973 | 1.218185 | 0.224784 | 0.435596 | -4.80699 |
| AC007599.2  | 1.968532 | 1.78255  | 1.218335 | 0.224728 | 0.435596 | -4.87814 |
| AL445489.1  | 1.568892 | 3.386149 | 1.216945 | 0.225255 | 0.436283 | -4.9974  |
| LINC01068   | 1.727354 | 4.685217 | 1.216945 | 0.225255 | 0.436283 | -5.13241 |
| AC134407.3  | -0.21915 | 7.047494 | -1.21624 | 0.225523 | 0.436688 | -6.22287 |
| ERI3-IT1    | -0.66246 | 5.021766 | -1.21362 | 0.22652  | 0.438507 | -5.82535 |
| AC005632.2  | 0.281561 | 6.87865  | 1.213257 | 0.226658 | 0.438661 | -6.09107 |
| SOS1-IT1    | -0.23167 | 7.927544 | -1.21251 | 0.226942 | 0.439098 | -6.37269 |
| AC034206.1  | 2.436714 | 3.145157 | 1.211726 | 0.227242 | 0.439565 | -4.91889 |
| AC243967.3  | 1.734612 | -0.20367 | 1.209635 | 0.228042 | 0.440464 | -4.83578 |

|             |          |          |          |          |          |          |
|-------------|----------|----------|----------|----------|----------|----------|
| AP003498.1  | 2.501849 | 0.574182 | 1.209438 | 0.228117 | 0.440464 | -4.83977 |
| AL023881.1  | 2.270834 | 1.593698 | 1.209539 | 0.228078 | 0.440464 | -4.87015 |
| AC015849.1  | 1.745292 | 2.406308 | 1.209654 | 0.228034 | 0.440464 | -4.91901 |
| AC104794.4  | -1.02807 | 3.376486 | -1.2099  | 0.227942 | 0.440464 | -5.34154 |
| AL031666.3  | -0.53601 | 5.341424 | -1.20961 | 0.228052 | 0.440464 | -5.82997 |
| AL353583.1  | 0.358111 | 6.819914 | 1.209817 | 0.227972 | 0.440464 | -6.06448 |
| AC129502.1  | 1.33383  | 3.109653 | 1.208987 | 0.22829  | 0.440684 | -4.98616 |
| AP005899.1  | 0.358557 | 7.941418 | 1.208505 | 0.228474 | 0.440927 | -6.29439 |
| AC006205.2  | 2.276998 | -1.25487 | 1.207417 | 0.228892 | 0.441071 | -4.81601 |
| AC011373.1  | 2.49073  | -0.78788 | 1.206629 | 0.229195 | 0.441071 | -4.81877 |
| AC009227.1  | 1.835132 | -1.02354 | 1.206968 | 0.229064 | 0.441071 | -4.8213  |
| AC099489.3  | 1.178291 | 2.321214 | 1.20668  | 0.229175 | 0.441071 | -4.9396  |
| AL049836.1  | 2.494483 | 4.062829 | 1.207126 | 0.229004 | 0.441071 | -4.98156 |
| LINC02100   | 3.620196 | 6.356421 | 1.207765 | 0.228759 | 0.441071 | -5.07876 |
| AL031283.3  | -1.41774 | 2.44288  | -1.20723 | 0.228962 | 0.441071 | -5.1611  |
| AC092376.2  | -0.38197 | 4.789029 | -1.20708 | 0.22902  | 0.441071 | -5.68167 |
| AC007922.2  | -0.83463 | 4.839162 | -1.20796 | 0.228683 | 0.441071 | -5.77804 |
| LINC01268   | -0.58946 | 5.203469 | -1.20667 | 0.229178 | 0.441071 | -5.79035 |
| COL4A2-AS1  | -0.8338  | 4.872613 | -1.20746 | 0.228874 | 0.441071 | -5.82756 |
| AC123912.1  | -1.31963 | 3.579555 | -1.20635 | 0.229304 | 0.441168 | -5.45926 |
| AL596244.1  | -0.38328 | 7.638327 | -1.20595 | 0.229454 | 0.441344 | -6.35776 |
| AC096992.2  | 0.305516 | 7.966654 | 1.205677 | 0.229561 | 0.441436 | -6.3166  |
| AC027306.1  | -1.79092 | -0.84923 | -1.20505 | 0.229801 | 0.441784 | -4.91082 |
| AP003306.2  | 2.163439 | -1.51447 | 1.203777 | 0.230293 | 0.442617 | -4.8189  |
| LINC00398   | 1.56614  | 2.684052 | 1.203593 | 0.230364 | 0.44264  | -4.94899 |
| AC120498.8  | 2.167118 | 0.779632 | 1.203324 | 0.230468 | 0.442726 | -4.85697 |
| AC092828.1  | -0.30159 | 5.971489 | -1.2029  | 0.23063  | 0.442925 | -5.96502 |
| AC087362.2  | -0.74757 | 5.02156  | -1.20268 | 0.230715 | 0.442976 | -5.87855 |
| AC005104.1  | -0.2259  | 8.546342 | -1.20252 | 0.230777 | 0.44298  | -6.48455 |
| C5orf66-AS2 | -0.97479 | 1.673288 | -1.20126 | 0.231265 | 0.443804 | -5.06602 |
| AP000255.1  | -0.5531  | 4.746034 | -1.19999 | 0.231756 | 0.44452  | -5.70414 |
| AC022762.2  | -0.37762 | 6.838687 | -1.2     | 0.231752 | 0.44452  | -6.2224  |
| AP000812.1  | 2.252621 | -1.02387 | 1.199714 | 0.231864 | 0.444612 | -4.82489 |
| Z83843.1    | -0.25674 | 8.939643 | -1.19929 | 0.232029 | 0.444817 | -6.55168 |
| DNAJB5-DT   | 1.766089 | 2.850837 | 1.198125 | 0.23248  | 0.445548 | -4.95574 |
| AL645465.1  | -1.45224 | 1.745612 | -1.198   | 0.232529 | 0.445548 | -5.08941 |
| AC053503.5  | 1.193338 | 5.300994 | 1.197284 | 0.232806 | 0.445918 | -5.40952 |
| AC011511.3  | 0.652729 | 6.949456 | 1.197194 | 0.232841 | 0.445918 | -6.02422 |
| AL031665.1  | 2.212576 | 1.002972 | 1.196556 | 0.233089 | 0.445945 | -4.86946 |
| AL359697.1  | 0.435538 | 6.563727 | 1.196548 | 0.233093 | 0.445945 | -5.98321 |
| LINC01389   | 0.65172  | 7.594451 | 1.196585 | 0.233078 | 0.445945 | -6.19497 |
| AC008608.2  | 0.323893 | 7.986351 | 1.19661  | 0.233068 | 0.445945 | -6.31967 |
| AL358074.1  | 1.487354 | 0.84222  | 1.195793 | 0.233387 | 0.446184 | -4.8821  |
| AL353771.1  | 1.785591 | 2.995736 | 1.195782 | 0.233391 | 0.446184 | -4.97049 |
| AC009159.4  | -1.4093  | 1.366462 | -1.19562 | 0.233456 | 0.446184 | -5.08162 |
| AL603832.1  | 0.473537 | 6.234759 | 1.195643 | 0.233445 | 0.446184 | -5.84927 |
| AC018716.1  | 2.670575 | -0.6852  | 1.194849 | 0.233754 | 0.446301 | -4.82957 |
| AL157770.1  | 2.140738 | 1.010395 | 1.195034 | 0.233682 | 0.446301 | -4.87153 |
| AL132765.2  | 2.01115  | 3.069064 | 1.19489  | 0.233738 | 0.446301 | -4.95493 |
| LPP-AS2     | 0.352339 | 8.176252 | 1.194905 | 0.233732 | 0.446301 | -6.3581  |
| AC005291.1  | 2.239452 | 0.146489 | 1.194647 | 0.233833 | 0.446338 | -4.84817 |
| AL513523.3  | 2.214654 | 1.31659  | 1.194142 | 0.23403  | 0.446487 | -4.87797 |
| AC104964.4  | -0.58434 | 6.13096  | -1.19416 | 0.234024 | 0.446487 | -6.13647 |
| AC068790.3  | -0.3019  | 7.034046 | -1.19316 | 0.234413 | 0.447105 | -6.25596 |
| AC005304.3  | 2.210192 | -1.18907 | 1.191614 | 0.235017 | 0.447759 | -4.83195 |
| AC113410.3  | 2.026866 | 5.662482 | 1.191521 | 0.235054 | 0.447759 | -5.25525 |
| AC078883.3  | 1.754073 | 6.079136 | 1.191708 | 0.234981 | 0.447759 | -5.45402 |
| AC011445.1  | 1.038434 | 5.581649 | 1.191849 | 0.234925 | 0.447759 | -5.52834 |

|             |          |          |          |          |          |          |
|-------------|----------|----------|----------|----------|----------|----------|
| AC026803.2  | 0.334055 | 5.975025 | 1.191783 | 0.234951 | 0.447759 | -5.81247 |
| AL138963.1  | 0.361556 | 7.909701 | 1.191259 | 0.235156 | 0.44784  | -6.30757 |
| AC127024.2  | 0.348574 | 7.201814 | 1.190101 | 0.23561  | 0.44859  | -6.18875 |
| AC010186.1  | 2.128657 | -0.39533 | 1.189497 | 0.235847 | 0.448927 | -4.84583 |
| AC145207.1  | 2.028293 | 0.61323  | 1.188898 | 0.236082 | 0.449261 | -4.86937 |
| AC011611.2  | 2.470407 | 1.786636 | 1.188141 | 0.236379 | 0.449611 | -4.89159 |
| AL033528.2  | 1.817748 | 1.463472 | 1.188125 | 0.236385 | 0.449611 | -4.9003  |
| AC073323.1  | 2.419948 | -0.54654 | 1.187459 | 0.236647 | 0.449899 | -4.84128 |
| AC010320.2  | -0.59315 | 3.516778 | -1.18743 | 0.236657 | 0.449899 | -5.39834 |
| AC110801.1  | -1.66683 | 1.828468 | -1.18539 | 0.237461 | 0.451202 | -5.17944 |
| AC002044.3  | -0.60923 | 5.461039 | -1.18539 | 0.237462 | 0.451202 | -5.96168 |
| AL359852.1  | 1.751421 | -2.49868 | 1.184806 | 0.237692 | 0.451509 | -4.83495 |
| AL022328.2  | -0.20177 | 9.213628 | -1.18467 | 0.237744 | 0.451509 | -6.60659 |
| PSD2-AS1    | 2.255181 | -1.41783 | 1.183986 | 0.238016 | 0.451785 | -4.83787 |
| AC005281.1  | -1.51604 | 1.634421 | -1.18396 | 0.238028 | 0.451785 | -5.12937 |
| AC090515.5  | -0.55152 | 5.635664 | -1.18385 | 0.23807  | 0.451785 | -5.99317 |
| Z98884.2    | 0.247827 | 8.841679 | 1.183682 | 0.238135 | 0.451796 | -6.48618 |
| AC091965.4  | -1.04478 | 4.603421 | -1.18324 | 0.238311 | 0.452015 | -5.65463 |
| AL022097.1  | -0.48358 | 5.171953 | -1.1828  | 0.238486 | 0.452223 | -5.79625 |
| AC087620.1  | 0.323009 | 7.028541 | 1.182656 | 0.238541 | 0.452223 | -6.16045 |
| AC016747.4  | 0.541625 | 4.193778 | 1.18236  | 0.238658 | 0.452331 | -5.28396 |
| AC104072.1  | -1.78056 | 0.848753 | -1.18132 | 0.23907  | 0.452997 | -5.05373 |
| HHIP-AS1    | -0.62191 | 5.882948 | -1.18084 | 0.23926  | 0.453242 | -6.03895 |
| AC007679.1  | -1.8355  | -1.98061 | -1.18043 | 0.239421 | 0.453433 | -4.89822 |
| AC007879.2  | 2.178623 | 1.303834 | 1.180209 | 0.23951  | 0.453488 | -4.89051 |
| AC018521.3  | 1.921709 | 0.399695 | 1.179997 | 0.239594 | 0.453516 | -4.87512 |
| AL078587.1  | -1.0887  | 4.73837  | -1.17987 | 0.239646 | 0.453516 | -5.7368  |
| AC116407.4  | -0.21352 | 7.558379 | -1.17949 | 0.239796 | 0.453686 | -6.34964 |
| AC104365.2  | 2.009847 | 0.494218 | 1.178862 | 0.240045 | 0.453814 | -4.87848 |
| AC087277.2  | 2.639569 | 2.493992 | 1.179024 | 0.23998  | 0.453814 | -4.91853 |
| AC100810.1  | -0.2781  | 9.860509 | -1.17896 | 0.240006 | 0.453814 | -6.72301 |
| AC022919.1  | -1.79699 | -0.71998 | -1.17824 | 0.24029  | 0.454089 | -4.94738 |
| AC119800.1  | 1.91677  | 3.160083 | 1.178191 | 0.240311 | 0.454089 | -4.98627 |
| LINC01731   | 2.311206 | 0.892575 | 1.176937 | 0.24081  | 0.454461 | -4.88154 |
| RPS6KA2-AS1 | -1.88337 | -1.63    | -1.1771  | 0.240744 | 0.454461 | -4.91251 |
| AC013553.4  | 1.754407 | 2.50243  | 1.17738  | 0.240634 | 0.454461 | -4.95523 |
| AC008073.1  | -1.49544 | 1.346044 | -1.17699 | 0.240787 | 0.454461 | -5.0755  |
| AC131009.1  | 0.823418 | 6.053498 | 1.177165 | 0.240719 | 0.454461 | -5.75297 |
| AL512652.2  | 1.177971 | 2.95574  | 1.176387 | 0.24103  | 0.454646 | -5.00793 |
| AC073592.1  | 0.961125 | 4.721104 | 1.176446 | 0.241006 | 0.454646 | -5.28962 |
| LINC01801   | -0.65894 | 4.214403 | -1.1757  | 0.241302 | 0.455047 | -5.61156 |
| ELDR        | 1.423304 | 1.475074 | 1.174746 | 0.241684 | 0.455651 | -4.92274 |
| AL135818.2  | 1.118652 | 6.079304 | 1.174409 | 0.241818 | 0.455676 | -5.67513 |
| AC090617.5  | 0.270915 | 8.231803 | 1.174425 | 0.241812 | 0.455676 | -6.40502 |
| LLPH-DT     | 2.387217 | 5.77978  | 1.17411  | 0.241937 | 0.455786 | -5.20732 |
| AL138688.2  | -0.89301 | 2.809148 | -1.17337 | 0.242233 | 0.456229 | -5.25838 |
| AC021231.1  | -1.16199 | 1.901987 | -1.17289 | 0.242425 | 0.456475 | -5.13701 |
| AC006237.1  | -1.45151 | 2.200206 | -1.17274 | 0.242485 | 0.456475 | -5.23264 |
| AC131157.1  | 2.708552 | 0.663614 | 1.172306 | 0.242659 | 0.456573 | -4.87268 |
| AL121672.2  | 0.491024 | 5.578151 | 1.172344 | 0.242644 | 0.456573 | -5.70678 |
| AL592528.1  | 1.308719 | 0.285828 | 1.171742 | 0.242885 | 0.456769 | -4.89241 |
| AC022400.9  | 0.191174 | 6.736661 | 1.171881 | 0.242829 | 0.456769 | -6.133   |
| AC025539.1  | 1.070082 | 3.070947 | 1.170613 | 0.243337 | 0.457458 | -5.05464 |
| AP003170.3  | -0.85721 | 6.649479 | -1.17052 | 0.243373 | 0.457458 | -6.29446 |
| TCF4-AS1    | 2.565143 | 0.667762 | 1.169712 | 0.243699 | 0.457755 | -4.87788 |
| AL512283.1  | -1.58313 | 0.151417 | -1.16962 | 0.243734 | 0.457755 | -4.98951 |
| AC119403.1  | -0.46187 | 6.526258 | -1.16952 | 0.243774 | 0.457755 | -6.19778 |
| AL928654.2  | 0.270168 | 9.610908 | 1.169875 | 0.243633 | 0.457755 | -6.61873 |

|             |          |          |          |          |          |          |
|-------------|----------|----------|----------|----------|----------|----------|
| AC020908.3  | 0.74782  | 6.101657 | 1.168693 | 0.244108 | 0.458267 | -5.67845 |
| AC008957.2  | 2.221797 | 3.536017 | 1.16836  | 0.244242 | 0.458404 | -5.01624 |
| AC026785.3  | 2.774846 | -0.26048 | 1.167355 | 0.244646 | 0.459048 | -4.85866 |
| AC019129.2  | 1.791127 | -0.21001 | 1.167094 | 0.244752 | 0.459131 | -4.87685 |
| AC012360.1  | 1.229749 | 4.506026 | 1.166774 | 0.24488  | 0.459143 | -5.20973 |
| AC005726.3  | 0.351416 | 8.288305 | 1.166854 | 0.244848 | 0.459143 | -6.38952 |
| AC037459.4  | 1.988848 | -1.77153 | 1.166372 | 0.245043 | 0.45915  | -4.85375 |
| AC005277.2  | -1.47276 | 2.618298 | -1.16631 | 0.245066 | 0.45915  | -5.29231 |
| AL049780.3  | -0.36473 | 4.42192  | -1.16616 | 0.245129 | 0.45915  | -5.59977 |
| AL162311.1  | -0.70494 | 4.696625 | -1.16622 | 0.245104 | 0.45915  | -5.78583 |
| MDC1-AS1    | 1.887713 | 0.227938 | 1.165738 | 0.245298 | 0.459353 | -4.88628 |
| AL121656.1  | 2.211351 | -1.54439 | 1.165473 | 0.245405 | 0.459439 | -4.85488 |
| AF111169.3  | 0.577898 | 5.107495 | 1.165188 | 0.24552  | 0.45954  | -5.601   |
| AC025754.2  | 1.630206 | 3.812691 | 1.16446  | 0.245814 | 0.459689 | -5.09056 |
| AL157395.1  | 1.28432  | 5.230457 | 1.164724 | 0.245707 | 0.459689 | -5.40259 |
| AC092756.1  | 0.397112 | 7.228877 | 1.164508 | 0.245794 | 0.459689 | -6.20351 |
| AP006621.5  | 0.369802 | 8.353641 | 1.164248 | 0.2459   | 0.459689 | -6.41205 |
| AP003392.1  | -0.23514 | 8.401765 | -1.16423 | 0.245906 | 0.459689 | -6.50501 |
| AL157834.1  | -1.51286 | 1.856347 | -1.16403 | 0.245988 | 0.459728 | -5.15058 |
| AC087500.2  | -0.86323 | 4.747374 | -1.16277 | 0.246495 | 0.460562 | -5.71926 |
| AC010768.1  | 1.427646 | 3.67414  | 1.162385 | 0.246653 | 0.460742 | -5.09269 |
| ITGB5-AS1   | 1.145709 | 5.226508 | 1.161884 | 0.246856 | 0.460909 | -5.44434 |
| AC015853.3  | -0.3675  | 5.762471 | -1.16178 | 0.246896 | 0.460909 | -6.01227 |
| SUCLA2-AS1  | 0.365473 | 7.730757 | 1.161711 | 0.246926 | 0.460909 | -6.31796 |
| LINC02348   | 2.216113 | -1.17383 | 1.159766 | 0.247716 | 0.461924 | -4.86151 |
| AC011369.1  | 2.142375 | -0.29465 | 1.159684 | 0.247749 | 0.461924 | -4.87455 |
| AL590714.1  | 2.126921 | -0.04593 | 1.15935  | 0.247885 | 0.461924 | -4.88102 |
| AC080038.3  | 1.960196 | 2.603604 | 1.159722 | 0.247733 | 0.461924 | -4.96878 |
| AL121760.1  | 2.194776 | 3.12699  | 1.15921  | 0.247941 | 0.461924 | -5.00128 |
| AC103736.1  | -1.39672 | 1.498314 | -1.15916 | 0.247962 | 0.461924 | -5.10639 |
| CAHM        | 0.732426 | 5.870971 | 1.159691 | 0.247746 | 0.461924 | -5.66912 |
| AP005329.2  | -0.33053 | 6.798529 | -1.15958 | 0.24779  | 0.461924 | -6.26225 |
| AC138466.5  | 0.343458 | 6.237249 | 1.159007 | 0.248024 | 0.461925 | -5.95368 |
| AL162385.2  | -1.12435 | 4.625355 | -1.15871 | 0.248144 | 0.462034 | -5.70654 |
| AC084398.2  | 1.915148 | 1.826964 | 1.158442 | 0.248253 | 0.462123 | -4.9367  |
| AL138999.1  | -1.51938 | 2.32814  | -1.15792 | 0.248468 | 0.462178 | -5.21841 |
| AC005261.2  | 0.666812 | 4.807606 | 1.157977 | 0.248443 | 0.462178 | -5.39603 |
| AC009269.5  | 0.677175 | 5.800418 | 1.158079 | 0.248401 | 0.462178 | -5.74766 |
| AC087501.4  | -0.2237  | 6.557032 | -1.15773 | 0.248543 | 0.462204 | -6.17538 |
| LINC01756   | 1.672461 | -2.46485 | 1.157137 | 0.248785 | 0.462311 | -4.86085 |
| AL034376.2  | 2.366934 | -0.78252 | 1.157239 | 0.248743 | 0.462311 | -4.86594 |
| AC127496.2  | -1.12305 | 3.729247 | -1.15716 | 0.248775 | 0.462311 | -5.55951 |
| Z98749.1    | 1.839611 | 3.363058 | 1.156426 | 0.249075 | 0.462734 | -5.02283 |
| LINC01556   | 2.376095 | 3.562108 | 1.156155 | 0.249185 | 0.462825 | -5.00594 |
| AC110771.1  | -0.47137 | 3.610813 | -1.15594 | 0.249273 | 0.462875 | -5.39831 |
| AC010463.3  | 0.290084 | 7.359729 | 1.155784 | 0.249337 | 0.462878 | -6.25716 |
| AC008739.5  | -1.16414 | 1.685946 | -1.15541 | 0.249488 | 0.462918 | -5.10071 |
| AL353150.1  | 0.663319 | 6.773487 | 1.155278 | 0.249543 | 0.462918 | -6.04021 |
| AL139099.2  | -0.28419 | 6.77209  | -1.1555  | 0.249451 | 0.462918 | -6.24469 |
| AC120498.10 | -1.45326 | 2.164334 | -1.15379 | 0.250152 | 0.463934 | -5.20396 |
| AC010325.2  | 2.188439 | 2.92883  | 1.152999 | 0.250475 | 0.464302 | -4.98261 |
| AL359915.1  | -1.61092 | 0.090614 | -1.15301 | 0.25047  | 0.464302 | -5.00896 |
| AC092580.2  | 2.172907 | -1.21986 | 1.152486 | 0.250685 | 0.464348 | -4.86821 |
| AC007998.5  | -1.4713  | 2.540944 | -1.15268 | 0.250605 | 0.464348 | -5.32278 |
| AC018926.2  | -0.29134 | 6.975426 | -1.15249 | 0.250683 | 0.464348 | -6.28698 |
| AP001324.3  | 1.39257  | 2.740751 | 1.152319 | 0.250753 | 0.46436  | -5.0122  |
| AC124276.2  | 2.013651 | 2.075039 | 1.152006 | 0.250881 | 0.464483 | -4.95076 |
| AC008438.2  | 2.029147 | -1.07368 | 1.15124  | 0.251196 | 0.46495  | -4.87169 |

|              |          |          |          |          |          |          |
|--------------|----------|----------|----------|----------|----------|----------|
| AL356121.2   | 1.949813 | -0.74506 | 1.150732 | 0.251404 | 0.465135 | -4.87765 |
| AC005790.1   | -1.58151 | 2.040492 | -1.1507  | 0.251419 | 0.465135 | -5.21924 |
| AC016396.1   | 2.197212 | 0.074415 | 1.149916 | 0.251739 | 0.465612 | -4.89258 |
| AC005839.1   | 0.181491 | 8.094005 | 1.149045 | 0.252097 | 0.466159 | -6.42097 |
| AC073569.3   | 0.710844 | 5.089696 | 1.148632 | 0.252267 | 0.466359 | -5.43235 |
| AC239584.1   | 2.16343  | -1.19608 | 1.147806 | 0.252607 | 0.466499 | -4.87263 |
| AC104971.3   | 2.458662 | 0.038065 | 1.148065 | 0.2525   | 0.466499 | -4.88672 |
| AC007848.2   | 1.839974 | 0.813889 | 1.14724  | 0.25284  | 0.466499 | -4.92068 |
| AP006248.3   | -1.91231 | -1.55125 | -1.14777 | 0.252622 | 0.466499 | -4.94532 |
| AC008011.2   | 3.105001 | 4.061325 | 1.147571 | 0.252704 | 0.466499 | -5.00635 |
| AC021491.4   | -0.79477 | 3.280894 | -1.14725 | 0.252838 | 0.466499 | -5.30874 |
| AP000345.2   | -0.69628 | 4.435201 | -1.14785 | 0.252587 | 0.466499 | -5.69689 |
| AL049840.3   | -0.28795 | 8.983573 | -1.1474  | 0.252773 | 0.466499 | -6.6225  |
| AC015795.1   | 1.720617 | 3.149221 | 1.146908 | 0.252977 | 0.466637 | -5.01704 |
| C10orf111    | 0.332059 | 5.352156 | 1.145956 | 0.253369 | 0.467247 | -5.69407 |
| AC004461.2   | -0.28889 | 6.235498 | -1.14557 | 0.253529 | 0.467391 | -6.1523  |
| AL031670.1   | 0.250198 | 8.136683 | 1.145465 | 0.253572 | 0.467391 | -6.42831 |
| AC012313.1   | 0.284889 | 9.449434 | 1.14514  | 0.253706 | 0.467524 | -6.62525 |
| HHATL-AS1    | -1.65037 | -1.4107  | -1.14351 | 0.254381 | 0.468313 | -4.94688 |
| AC008750.2   | 1.664546 | 2.178296 | 1.143886 | 0.254225 | 0.468313 | -4.97702 |
| AL450344.3   | -0.80321 | 5.057233 | -1.1435  | 0.254384 | 0.468313 | -5.96391 |
| AL049780.2   | 0.296743 | 6.569971 | 1.143693 | 0.254304 | 0.468313 | -6.10649 |
| AC083809.1   | 2.685713 | 4.945862 | 1.143087 | 0.254556 | 0.468514 | -5.10994 |
| AC145207.9   | 0.494274 | 7.236657 | 1.142095 | 0.254966 | 0.469156 | -6.1911  |
| AC013714.1   | 1.804745 | 1.737037 | 1.1413   | 0.255296 | 0.469545 | -4.95667 |
| AC243964.2   | -0.46848 | 6.374734 | -1.14128 | 0.255303 | 0.469545 | -6.19346 |
| SALRNA2      | -1.2695  | 0.658443 | -1.14107 | 0.255392 | 0.469593 | -5.04803 |
| AC007216.1   | -0.60391 | 4.674554 | -1.14071 | 0.255542 | 0.46967  | -5.75984 |
| AC105935.1   | -0.40543 | 5.574526 | -1.14067 | 0.255559 | 0.46967  | -5.94314 |
| DOCK9-DT     | 0.51909  | 7.985365 | 1.139504 | 0.256042 | 0.470443 | -6.37871 |
| AL589765.4   | 0.409838 | 7.811583 | 1.139126 | 0.256199 | 0.470617 | -6.35658 |
| AC114488.3   | 1.327677 | 3.83395  | 1.13888  | 0.256301 | 0.47069  | -5.15215 |
| AC009127.1   | 1.728588 | 3.050625 | 1.138707 | 0.256373 | 0.470707 | -5.02855 |
| AL589990.1   | -1.02824 | 3.450153 | -1.13828 | 0.256549 | 0.470914 | -5.41208 |
| PIK3CD-AS1   | 1.196584 | 2.854652 | 1.137568 | 0.256848 | 0.471018 | -5.04944 |
| AC027228.3   | 1.046281 | 3.261055 | 1.137785 | 0.256757 | 0.471018 | -5.08152 |
| AC016957.2   | -0.46625 | 7.134665 | -1.13775 | 0.256771 | 0.471018 | -6.35925 |
| AP001033.2   | -0.27678 | 8.535506 | -1.13755 | 0.256856 | 0.471018 | -6.56255 |
| AC008592.5   | -1.49226 | 1.855629 | -1.13718 | 0.25701  | 0.471171 | -5.15177 |
| SLC25A25-AS1 | -0.48448 | 9.466859 | -1.13705 | 0.257065 | 0.471171 | -6.72116 |
| FP236383.2   | -0.94577 | 7.991091 | -1.13664 | 0.257236 | 0.47137  | -6.55915 |
| CACNA1G-AS1  | -1.26506 | 0.977874 | -1.13599 | 0.257504 | 0.471499 | -5.07255 |
| AP006333.2   | -1.2103  | 2.045686 | -1.13571 | 0.257621 | 0.471499 | -5.21048 |
| AC068700.1   | -0.74991 | 2.604085 | -1.1363  | 0.257375 | 0.471499 | -5.27006 |
| AC002310.1   | 0.292372 | 7.368176 | 1.135931 | 0.25753  | 0.471499 | -6.28158 |
| AC008894.3   | 0.313002 | 7.759142 | 1.13577  | 0.257597 | 0.471499 | -6.36917 |
| AC099677.4   | 2.309995 | -0.78943 | 1.135555 | 0.257687 | 0.471506 | -4.88628 |
| AL731577.2   | -0.28482 | 8.983107 | -1.13532 | 0.257786 | 0.471573 | -6.63582 |
| AC010336.2   | 1.973639 | 1.706121 | 1.134264 | 0.258227 | 0.472263 | -4.95505 |
| AL355312.3   | 0.332416 | 9.364891 | 1.1341   | 0.258295 | 0.472274 | -6.61355 |
| AC138965.3   | 2.025135 | 0.859301 | 1.133307 | 0.258627 | 0.472754 | -4.92989 |
| AC084864.1   | 2.219548 | 2.232829 | 1.133146 | 0.258695 | 0.472754 | -4.97    |
| AL008628.1   | -1.14141 | -0.03899 | -1.13302 | 0.258747 | 0.472754 | -4.99184 |
| AC087588.2   | 0.791346 | 7.331063 | 1.132673 | 0.258892 | 0.47287  | -6.16271 |
| FLNB-AS1     | -0.34236 | 7.544977 | -1.13257 | 0.258936 | 0.47287  | -6.42048 |
| LINC02274    | 1.88861  | -0.36568 | 1.131061 | 0.259569 | 0.473891 | -4.90424 |
| AL031722.1   | -1.06889 | 4.538678 | -1.13093 | 0.259622 | 0.473891 | -5.72778 |
| AC018445.2   | 2.243927 | 1.68693  | 1.130482 | 0.259812 | 0.474008 | -4.95069 |

|            |          |          |          |          |          |          |
|------------|----------|----------|----------|----------|----------|----------|
| AP005131.6 | -0.44483 | 4.859597 | -1.13055 | 0.259784 | 0.474008 | -5.76475 |
| AC012354.1 | 1.742239 | -1.49885 | 1.130096 | 0.259974 | 0.474099 | -4.88884 |
| AC093525.7 | -0.38738 | 4.25857  | -1.13006 | 0.259988 | 0.474099 | -5.5766  |
| AL391832.1 | 2.214475 | 0.157329 | 1.129539 | 0.260208 | 0.47427  | -4.91126 |
| AC087893.1 | 1.001009 | 4.151448 | 1.129596 | 0.260184 | 0.47427  | -5.22322 |
| CDKN2A-DT  | 2.142092 | -0.66394 | 1.129367 | 0.26028  | 0.474271 | -4.89598 |
| AC063926.1 | -1.96882 | -0.33569 | -1.12911 | 0.260387 | 0.474271 | -5.01783 |
| AC009549.1 | -0.55777 | 4.814639 | -1.12909 | 0.260398 | 0.474271 | -5.82237 |
| AC027763.2 | 2.595156 | 5.663271 | 1.128678 | 0.26057  | 0.474363 | -5.23974 |
| AL138955.1 | 0.286973 | 6.07224  | 1.128668 | 0.260574 | 0.474363 | -5.95622 |
| AC005064.1 | -1.59818 | -0.05714 | -1.1281  | 0.260813 | 0.474682 | -5.01944 |
| LINC01054  | -1.78861 | -0.6183  | -1.12699 | 0.261283 | 0.475078 | -5.00128 |
| AL359091.5 | 1.43522  | 6.383286 | 1.127239 | 0.261176 | 0.475078 | -5.59359 |
| ARAP1-AS2  | 0.33975  | 6.329877 | 1.12706  | 0.261252 | 0.475078 | -6.03093 |
| LBX2-AS1   | 0.436099 | 10.0857  | 1.127089 | 0.261239 | 0.475078 | -6.70353 |
| AC010168.2 | -0.29647 | 7.709622 | -1.12671 | 0.261399 | 0.475173 | -6.45266 |
| LINC01120  | 1.766097 | -1.1761  | 1.126182 | 0.261622 | 0.475387 | -4.89557 |
| AC244034.2 | 1.672713 | 4.53845  | 1.126132 | 0.261643 | 0.475387 | -5.23008 |
| AL360270.2 | 0.426434 | 5.040875 | 1.125746 | 0.261806 | 0.475568 | -5.55601 |
| LINC01004  | 0.257894 | 8.826402 | 1.125559 | 0.261885 | 0.475596 | -6.55128 |
| AL109945.1 | 1.863179 | 0.535985 | 1.125014 | 0.262116 | 0.4759   | -4.93288 |
| AC092127.2 | -1.11555 | 2.803666 | -1.12486 | 0.262181 | 0.475904 | -5.36503 |
| AC010280.2 | -1.31161 | 3.005856 | -1.12421 | 0.262453 | 0.476053 | -5.41098 |
| AC105429.1 | 0.310815 | 5.405626 | 1.124417 | 0.262368 | 0.476053 | -5.71626 |
| AC004771.5 | -0.29181 | 7.289047 | -1.12425 | 0.262439 | 0.476053 | -6.37642 |
| AC009065.5 | 0.707345 | 9.289034 | 1.123872 | 0.262598 | 0.476201 | -6.5569  |
| AL137802.1 | 2.173071 | 0.041492 | 1.122916 | 0.263003 | 0.476693 | -4.91505 |
| SFTPD-AS1  | -1.14415 | 0.05087  | -1.12267 | 0.263105 | 0.476693 | -5.00644 |
| AC007376.2 | 1.785187 | 3.236174 | 1.122632 | 0.263123 | 0.476693 | -5.04937 |
| AL157938.3 | 0.322847 | 4.842279 | 1.123039 | 0.262951 | 0.476693 | -5.52542 |
| AL133367.1 | 0.318379 | 7.164135 | 1.121615 | 0.263554 | 0.477359 | -6.25506 |
| AP003086.2 | 1.418293 | 5.037785 | 1.121296 | 0.26369  | 0.477489 | -5.3192  |
| AC090802.1 | 2.108945 | -1.46954 | 1.12082  | 0.263892 | 0.47774  | -4.89594 |
| AC006058.1 | -0.88213 | 2.750519 | -1.12018 | 0.264162 | 0.478114 | -5.33566 |
| AP001775.2 | 1.779822 | 3.663004 | 1.119738 | 0.264352 | 0.478341 | -5.10915 |
| AC011726.3 | 1.919779 | 1.882889 | 1.119373 | 0.264507 | 0.47844  | -4.97689 |
| AC110597.1 | -0.7895  | 2.493139 | -1.11931 | 0.264534 | 0.47844  | -5.24841 |
| AC022445.1 | 1.265773 | 4.45925  | 1.118788 | 0.264756 | 0.478727 | -5.31598 |
| AC093752.3 | -0.26837 | 8.775108 | -1.11831 | 0.26496  | 0.478981 | -6.61931 |
| AC087501.1 | -0.38414 | 6.034743 | -1.11795 | 0.265111 | 0.479138 | -6.13382 |
| AC119428.2 | 1.804301 | 1.009823 | 1.116534 | 0.265716 | 0.479655 | -4.95415 |
| AC110769.1 | 1.697765 | 1.310777 | 1.11661  | 0.265684 | 0.479655 | -4.96709 |
| AL512356.3 | 1.935455 | 1.608198 | 1.116571 | 0.2657   | 0.479655 | -4.96995 |
| AC004990.1 | 2.239501 | 5.2293   | 1.116839 | 0.265586 | 0.479655 | -5.25413 |
| AL132712.1 | 0.600164 | 7.989474 | 1.116714 | 0.265639 | 0.479655 | -6.35498 |
| AC114730.2 | 1.2763   | 3.387949 | 1.116106 | 0.265899 | 0.47987  | -5.12285 |
| AC004221.1 | 1.749294 | 2.257027 | 1.115069 | 0.266341 | 0.480527 | -5.01141 |
| AC090772.1 | -0.48668 | 6.232019 | -1.11495 | 0.266391 | 0.480527 | -6.21294 |
| AC000068.1 | -0.23482 | 6.146163 | -1.11461 | 0.26654  | 0.48068  | -6.12683 |
| AC022558.1 | 0.226292 | 7.246994 | 1.114198 | 0.266714 | 0.480879 | -6.288   |
| FO393418.1 | 1.022365 | 5.670368 | 1.113757 | 0.266903 | 0.481104 | -5.64708 |
| TRIM52-AS1 | -0.25603 | 9.743467 | -1.11315 | 0.267163 | 0.481457 | -6.76896 |
| AL391001.1 | -0.46885 | 6.656517 | -1.11274 | 0.267338 | 0.481656 | -6.30084 |
| AC004528.1 | 1.842325 | 0.065208 | 1.111706 | 0.267781 | 0.48234  | -4.93253 |
| AC016910.1 | -1.11547 | 2.278017 | -1.11125 | 0.267978 | 0.482522 | -5.25559 |
| GRK5-IT1   | -1.11036 | 3.984863 | -1.11117 | 0.268011 | 0.482522 | -5.62007 |
| AC090181.2 | 0.678101 | 8.015849 | 1.11084  | 0.268153 | 0.482662 | -6.3549  |
| AC005625.1 | 1.989735 | 0.919196 | 1.109522 | 0.268719 | 0.483566 | -4.95443 |



|             |          |          |          |          |          |          |
|-------------|----------|----------|----------|----------|----------|----------|
| AC021066.1  | 2.010914 | -0.69474 | 1.109117 | 0.268893 | 0.48361  | -4.91563 |
| AC019171.1  | 1.307785 | 3.222413 | 1.109114 | 0.268894 | 0.48361  | -5.09511 |
| AC023355.1  | 0.340455 | 5.014498 | 1.109016 | 0.268937 | 0.48361  | -5.62079 |
| AC027801.4  | -0.78839 | 4.685481 | -1.10865 | 0.269093 | 0.483775 | -5.83509 |
| AL022724.1  | 2.055441 | 0.675553 | 1.10817  | 0.269301 | 0.483878 | -4.9474  |
| AC024909.1  | 0.414511 | 5.944442 | 1.108071 | 0.269344 | 0.483878 | -5.92212 |
| AL109614.1  | 0.421435 | 7.552545 | 1.108094 | 0.269334 | 0.483878 | -6.32937 |
| AC027796.4  | 0.279978 | 8.450478 | 1.107816 | 0.269453 | 0.48396  | -6.50825 |
| AC009107.2  | -0.24506 | 6.358013 | -1.10751 | 0.269585 | 0.484081 | -6.18684 |
| AC006435.5  | 2.463629 | 2.209781 | 1.107237 | 0.269703 | 0.484133 | -4.98615 |
| ST3GAL5-AS1 | 1.797954 | 1.777133 | 1.107143 | 0.269743 | 0.484133 | -4.98633 |
| AC106895.2  | 1.786354 | -2.06821 | 1.106851 | 0.269869 | 0.484244 | -4.90707 |
| AC009480.1  | -1.15702 | 2.751224 | -1.10663 | 0.269965 | 0.484299 | -5.39001 |
| LINC00637   | 0.866528 | 3.525038 | 1.106477 | 0.27003  | 0.484302 | -5.16329 |
| AL590369.1  | 0.295076 | 6.583292 | 1.104894 | 0.270714 | 0.485412 | -6.14704 |
| AP003385.3  | 1.972567 | -1.70473 | 1.10419  | 0.271019 | 0.485445 | -4.91015 |
| AC091044.1  | 2.108637 | -0.0535  | 1.104363 | 0.270944 | 0.485445 | -4.93032 |
| AC073389.2  | -1.52892 | 0.481815 | -1.104   | 0.271102 | 0.485445 | -5.08663 |
| AL358394.1  | 2.22125  | 3.978334 | 1.103851 | 0.271165 | 0.485445 | -5.10565 |
| AC103858.1  | 1.799965 | 3.662237 | 1.104045 | 0.271081 | 0.485445 | -5.11639 |
| AL031658.1  | -0.55089 | 3.537782 | -1.10427 | 0.270984 | 0.485445 | -5.43926 |
| AC135048.1  | 0.447638 | 4.732673 | 1.103805 | 0.271185 | 0.485445 | -5.56086 |
| AL356020.1  | 0.827882 | 3.758287 | 1.103119 | 0.271482 | 0.485861 | -5.2302  |
| AC005332.6  | -0.20906 | 10.88553 | -1.10262 | 0.271698 | 0.486132 | -6.94252 |
| AC055733.2  | 2.122049 | -1.17681 | 1.102367 | 0.271808 | 0.486212 | -4.91389 |
| AC016949.1  | 0.234799 | 8.5663   | 1.102137 | 0.271908 | 0.486275 | -6.53945 |
| AL606760.3  | 1.082469 | 1.042283 | 1.101277 | 0.27228  | 0.486825 | -4.98959 |
| AC068860.1  | 0.901668 | 2.371255 | 1.101014 | 0.272394 | 0.486914 | -5.06464 |
| AL591167.1  | 1.973816 | -1.74018 | 1.100709 | 0.272527 | 0.487035 | -4.9132  |
| AL355803.1  | 2.50695  | 4.535641 | 1.099483 | 0.27306  | 0.487409 | -5.13072 |
| AL021937.1  | -0.39421 | 4.540256 | -1.09978 | 0.272932 | 0.487409 | -5.66804 |
| AC037487.4  | -0.7161  | 4.293479 | -1.09972 | 0.272954 | 0.487409 | -5.7119  |
| AL162311.3  | 0.485999 | 6.250404 | 1.099528 | 0.27304  | 0.487409 | -5.99895 |
| AL512770.1  | 0.220488 | 7.028596 | 1.09948  | 0.273061 | 0.487409 | -6.2697  |
| AP003068.4  | -0.45135 | 5.658179 | -1.09929 | 0.273144 | 0.487442 | -6.11042 |
| KCNQ5-IT1   | 2.221772 | -0.98282 | 1.098645 | 0.273424 | 0.487672 | -4.91805 |
| AC068658.1  | 2.178099 | -0.79821 | 1.09884  | 0.273339 | 0.487672 | -4.92079 |
| AL356056.2  | 0.883351 | 4.869621 | 1.098545 | 0.273468 | 0.487672 | -5.43299 |
| AC006042.4  | 1.539839 | 3.047874 | 1.098201 | 0.273617 | 0.487685 | -5.06872 |
| AC093677.2  | 0.636178 | 5.009926 | 1.0983   | 0.273574 | 0.487685 | -5.5714  |
| AC008870.4  | 0.474245 | 5.657235 | 1.098081 | 0.27367  | 0.487685 | -5.81111 |
| AC079915.1  | 0.333881 | 6.169306 | 1.096907 | 0.274181 | 0.48848  | -5.99427 |
| AC078883.2  | 0.758253 | 6.845968 | 1.096731 | 0.274258 | 0.488501 | -5.99408 |
| TLR8-AS1    | 1.800642 | -2.25612 | 1.096287 | 0.274451 | 0.488502 | -4.91579 |
| AC018695.2  | 1.886933 | 3.33162  | 1.096472 | 0.274371 | 0.488502 | -5.08665 |
| AL121782.1  | -0.81525 | 4.630489 | -1.09628 | 0.274453 | 0.488502 | -5.82885 |
| AL132639.2  | -0.26323 | 6.893713 | -1.09601 | 0.274571 | 0.488596 | -6.31902 |
| AL353898.3  | -0.23194 | 6.759397 | -1.09533 | 0.274871 | 0.488979 | -6.29386 |
| REV3L-IT1   | -0.51516 | 6.756536 | -1.09522 | 0.274917 | 0.488979 | -6.34266 |
| AL356481.2  | -0.5051  | 5.385968 | -1.09444 | 0.275257 | 0.489469 | -5.98204 |
| AC012501.1  | 2.113449 | 1.316059 | 1.094185 | 0.275369 | 0.489553 | -4.97414 |
| AC009163.6  | -0.30286 | 5.55332  | -1.09381 | 0.275535 | 0.489732 | -5.9812  |
| AC100778.1  | -1.74733 | -0.32703 | -1.09358 | 0.275635 | 0.489793 | -5.04785 |
| AP000302.1  | 1.599825 | 1.23566  | 1.093344 | 0.275737 | 0.489859 | -4.98915 |
| AC078788.2  | 2.170824 | 1.147415 | 1.092725 | 0.276008 | 0.490225 | -4.97209 |
| AC023509.3  | -0.2839  | 7.300149 | -1.09241 | 0.276145 | 0.490351 | -6.41834 |
| AC007638.2  | 1.771274 | 0.198308 | 1.09179  | 0.276418 | 0.49066  | -4.95568 |
| AL359532.1  | -0.36572 | 5.517016 | -1.09157 | 0.276515 | 0.49066  | -5.98101 |

|             |          |          |          |          |          |          |
|-------------|----------|----------|----------|----------|----------|----------|
| AP002993.1  | -0.51958 | 7.414327 | -1.0916  | 0.276502 | 0.49066  | -6.4819  |
| AC096720.2  | 0.310466 | 6.21218  | 1.0911   | 0.276721 | 0.490802 | -6.04443 |
| AC243964.3  | 0.305225 | 9.639048 | 1.09109  | 0.276725 | 0.490802 | -6.70824 |
| SCARNA9     | -0.28295 | 8.38242  | -1.08991 | 0.277242 | 0.491602 | -6.59203 |
| AC044802.2  | 2.182703 | 0.302303 | 1.089763 | 0.277308 | 0.491603 | -4.94979 |
| AP002505.2  | 1.707989 | 1.686714 | 1.089011 | 0.277638 | 0.492073 | -5.00487 |
| AC141930.1  | 2.000054 | 0.947229 | 1.088648 | 0.277798 | 0.49224  | -4.97273 |
| LINC02569   | -0.54796 | 5.31521  | -1.0885  | 0.277863 | 0.49224  | -5.94915 |
| AC055713.1  | 0.19157  | 6.674213 | 1.088339 | 0.277934 | 0.492249 | -6.16721 |
| AP000851.2  | 2.174    | -1.07931 | 1.087056 | 0.278499 | 0.492282 | -4.92841 |
| AC015909.2  | 1.923308 | 0.765799 | 1.087424 | 0.278337 | 0.492282 | -4.97217 |
| AP005264.1  | 1.938695 | 2.110479 | 1.087358 | 0.278366 | 0.492282 | -5.01437 |
| B4GALT4-AS1 | 1.589981 | 3.700206 | 1.087269 | 0.278405 | 0.492282 | -5.16946 |
| AF131215.2  | -1.092   | 2.294562 | -1.08793 | 0.278113 | 0.492282 | -5.28708 |
| AL163952.1  | 1.33026  | 4.875944 | 1.087177 | 0.278446 | 0.492282 | -5.31961 |
| AL031668.1  | 0.364918 | 6.441345 | 1.086957 | 0.278542 | 0.492282 | -6.09293 |
| AC104564.1  | -0.30489 | 6.629303 | -1.0878  | 0.278171 | 0.492282 | -6.28818 |
| AC015871.3  | 0.199245 | 8.353381 | 1.087132 | 0.278466 | 0.492282 | -6.52566 |
| AC010186.4  | 1.869093 | -1.69565 | 1.085944 | 0.278989 | 0.49281  | -4.92635 |
| AC007336.2  | 1.908877 | -1.84082 | 1.085362 | 0.279246 | 0.49281  | -4.92635 |
| AL807757.1  | 1.842413 | 2.357792 | 1.085239 | 0.279301 | 0.49281  | -5.02765 |
| AC010894.3  | 1.077874 | 3.34328  | 1.085486 | 0.279191 | 0.49281  | -5.15248 |
| AP001033.1  | 1.590925 | 5.704823 | 1.085828 | 0.27904  | 0.49281  | -5.3932  |
| Z73429.1    | -1.24817 | 1.847545 | -1.08525 | 0.279295 | 0.49281  | -5.40887 |
| AC107398.2  | 0.850127 | 5.748682 | 1.085851 | 0.27903  | 0.49281  | -5.71972 |
| AC090753.1  | 2.387675 | 0.024932 | 1.08466  | 0.279556 | 0.493118 | -4.94425 |
| AC245884.11 | 1.324465 | 1.316107 | 1.08425  | 0.279737 | 0.493118 | -5.00733 |
| AC022126.1  | 1.720754 | 3.599787 | 1.084518 | 0.279619 | 0.493118 | -5.13475 |
| AL445471.1  | 1.38189  | 4.688368 | 1.084364 | 0.279687 | 0.493118 | -5.29686 |
| PRR29-AS1   | 1.060621 | 1.401558 | 1.083847 | 0.279916 | 0.493316 | -5.01585 |
| AC010280.3  | 2.008933 | -1.60378 | 1.083619 | 0.280016 | 0.493378 | -4.92839 |
| KANSL1-AS1  | -0.33647 | 8.344679 | -1.08346 | 0.280088 | 0.493389 | -6.59069 |
| AC110792.2  | 1.419888 | 1.391797 | 1.083226 | 0.28019  | 0.493453 | -5.00843 |
| AC092490.1  | -0.72129 | 4.731479 | -1.08299 | 0.280295 | 0.493522 | -5.87339 |
| AL445472.1  | 0.337366 | 7.585888 | 1.08277  | 0.280392 | 0.493577 | -6.38828 |
| AL122125.1  | 0.883092 | 6.283616 | 1.082353 | 0.280577 | 0.493671 | -5.97824 |
| RC3H1-IT1   | -0.44238 | 6.188281 | -1.08246 | 0.280531 | 0.493671 | -6.22963 |
| OOEP-AS1    | 2.040595 | -1.32642 | 1.08211  | 0.280684 | 0.493744 | -4.93092 |
| AL357033.2  | -1.66673 | 1.101897 | -1.08196 | 0.280751 | 0.493745 | -5.15534 |
| SNAP47-AS1  | 1.046189 | 2.478234 | 1.080925 | 0.28121  | 0.494437 | -5.07716 |
| AL391361.3  | 2.383616 | -0.16118 | 1.080025 | 0.281609 | 0.494674 | -4.94528 |
| SHANK2-AS3  | 1.478429 | 1.059061 | 1.079837 | 0.281693 | 0.494674 | -4.99705 |
| AC093158.1  | -1.42616 | -0.44694 | -1.07964 | 0.281778 | 0.494674 | -5.03628 |
| AC138028.5  | -1.53713 | 0.334705 | -1.08017 | 0.281544 | 0.494674 | -5.08528 |
| AC005775.1  | 1.004827 | 4.34552  | 1.079582 | 0.281806 | 0.494674 | -5.30576 |
| AC025031.4  | 0.443486 | 4.970362 | 1.0804   | 0.281443 | 0.494674 | -5.62789 |
| AP000577.1  | 0.317792 | 6.380835 | 1.079907 | 0.281662 | 0.494674 | -6.12631 |
| AL844908.1  | 0.393333 | 5.97262  | 1.079241 | 0.281957 | 0.494825 | -5.96002 |
| AC009090.4  | 0.376685 | 4.386695 | 1.077849 | 0.282577 | 0.49568  | -5.46235 |
| AC006111.2  | 0.258883 | 7.945482 | 1.077881 | 0.282563 | 0.49568  | -6.45731 |
| AC018766.1  | -0.47741 | 5.691587 | -1.07755 | 0.282711 | 0.495685 | -6.08435 |
| ITCH-IT1    | 0.287932 | 7.635398 | 1.077648 | 0.282666 | 0.495685 | -6.40269 |
| AC005355.2  | 1.759919 | 3.412803 | 1.077164 | 0.282882 | 0.495868 | -5.10015 |
| LINC02393   | -1.60153 | -2.29879 | -1.07617 | 0.283322 | 0.496293 | -4.97919 |
| AC025048.1  | 1.98539  | 1.064718 | 1.076182 | 0.283319 | 0.496293 | -4.98689 |
| AC093732.2  | 1.955791 | 2.040877 | 1.076315 | 0.28326  | 0.496293 | -5.0221  |
| AL592211.1  | 0.351741 | 6.841517 | 1.075818 | 0.283482 | 0.496456 | -6.20922 |
| AL135905.1  | -0.33304 | 8.007961 | -1.07521 | 0.283753 | 0.496816 | -6.56308 |

|             |          |          |          |          |          |          |
|-------------|----------|----------|----------|----------|----------|----------|
| AC011676.1  | 0.498541 | 6.37824  | 1.075007 | 0.283843 | 0.496858 | -6.04053 |
| AC083805.3  | 1.630732 | -0.40705 | 1.074563 | 0.284042 | 0.496961 | -4.95903 |
| AC007681.1  | -0.34967 | 4.688539 | -1.07465 | 0.284003 | 0.496961 | -5.73461 |
| AC010997.4  | -0.50329 | 5.746178 | -1.07434 | 0.28414  | 0.496961 | -6.14181 |
| AC000068.2  | -0.36368 | 6.758782 | -1.07428 | 0.284167 | 0.496961 | -6.34535 |
| AC005740.3  | -0.49673 | 5.371083 | -1.07405 | 0.284271 | 0.497028 | -6.01963 |
| AC005736.2  | 2.121824 | 0.224317 | 1.073042 | 0.284722 | 0.497353 | -4.96592 |
| AP002957.1  | 1.706175 | -0.04432 | 1.073396 | 0.284564 | 0.497353 | -4.96643 |
| AC009108.3  | -0.66408 | 2.899884 | -1.07318 | 0.284658 | 0.497353 | -5.34595 |
| AC011825.2  | 0.442908 | 6.296174 | 1.073286 | 0.284613 | 0.497353 | -6.06329 |
| AC026471.3  | 2.190446 | 3.701558 | 1.071655 | 0.285343 | 0.498045 | -5.10095 |
| AC096708.3  | 1.724682 | 3.38685  | 1.071417 | 0.285449 | 0.498045 | -5.10996 |
| AC090907.2  | 1.364172 | 3.28534  | 1.071799 | 0.285278 | 0.498045 | -5.14141 |
| AL356752.1  | 1.227588 | 4.554856 | 1.071459 | 0.28543  | 0.498045 | -5.3354  |
| AC015799.1  | 0.22478  | 7.406432 | 1.071644 | 0.285348 | 0.498045 | -6.37337 |
| AC147651.3  | -1.89516 | -1.21979 | -1.07083 | 0.285714 | 0.498329 | -5.02719 |
| AP000254.1  | 0.208567 | 8.918766 | 1.070758 | 0.285745 | 0.498329 | -6.63677 |
| RAPGEF4-AS1 | 1.223435 | 0.124802 | 1.07056  | 0.285834 | 0.498368 | -4.98522 |
| AL450344.1  | 1.84859  | 0.448494 | 1.069782 | 0.286183 | 0.498843 | -4.98044 |
| AC073592.2  | 1.79296  | 2.702378 | 1.069657 | 0.286239 | 0.498843 | -5.06775 |
| AC055854.1  | -1.19654 | 2.05426  | -1.06923 | 0.286431 | 0.498972 | -5.24861 |
| AL583722.4  | -1.2938  | 1.947576 | -1.06905 | 0.286512 | 0.498972 | -5.25225 |
| HCG14       | -0.94845 | 4.116422 | -1.06918 | 0.286453 | 0.498972 | -5.62209 |
| AL390115.1  | 2.01773  | -1.24858 | 1.068599 | 0.286714 | 0.499093 | -4.94322 |
| KRTAP5-AS1  | -0.54419 | 5.501171 | -1.06868 | 0.28668  | 0.499093 | -6.01738 |
| AC019226.2  | 1.109286 | 5.81414  | 1.067786 | 0.28708  | 0.499613 | -5.62746 |
| AC093525.3  | 2.025274 | -0.23364 | 1.067415 | 0.287247 | 0.499673 | -4.96081 |
| AL353653.1  | 1.232572 | 3.851022 | 1.067361 | 0.287271 | 0.499673 | -5.21553 |
| AC007384.1  | -0.4263  | 6.43238  | -1.06727 | 0.287314 | 0.499673 | -6.27808 |
| IQCA1-AS1   | 2.0284   | -1.49354 | 1.066315 | 0.287742 | 0.500282 | -4.94364 |
| LINC02044   | 1.255001 | 1.372506 | 1.066012 | 0.287879 | 0.500282 | -5.02605 |
| AC117395.1  | 1.230104 | 4.013173 | 1.066096 | 0.287841 | 0.500282 | -5.25588 |
| AC018521.6  | -0.44691 | 7.916378 | -1.0659  | 0.28793  | 0.500282 | -6.57137 |
| AP000892.2  | -0.96544 | 4.184343 | -1.06568 | 0.28803  | 0.500339 | -5.75362 |
| PCSK6-AS1   | 1.769703 | 1.771859 | 1.064403 | 0.288605 | 0.500592 | -5.02613 |
| AL513164.1  | 2.168534 | 3.598413 | 1.064994 | 0.288338 | 0.500592 | -5.12146 |
| AP003072.5  | -1.16305 | 2.227495 | -1.06455 | 0.288539 | 0.500592 | -5.30038 |
| LYPLAL1-DT  | -1.04563 | 2.266403 | -1.06432 | 0.288642 | 0.500592 | -5.5198  |
| AC037487.1  | -0.44907 | 4.533783 | -1.06444 | 0.288587 | 0.500592 | -5.72655 |
| AC010327.4  | -0.58403 | 5.022896 | -1.06477 | 0.288439 | 0.500592 | -5.92846 |
| LINC00294   | 0.253059 | 9.925732 | 1.064739 | 0.288453 | 0.500592 | -6.78245 |
| AC011939.2  | -0.86706 | 4.656833 | -1.06379 | 0.288883 | 0.500895 | -5.877   |
| AL445248.1  | 0.258806 | 7.744195 | 1.063393 | 0.289061 | 0.501088 | -6.44314 |
| AL118558.4  | -0.29609 | 6.184687 | -1.0629  | 0.289284 | 0.501359 | -6.19461 |
| AC136621.1  | 1.933491 | 0.193194 | 1.062562 | 0.289437 | 0.501508 | -4.97705 |
| INTS6L-AS1  | 1.811844 | 2.833115 | 1.062016 | 0.289684 | 0.501705 | -5.07899 |
| AP006545.2  | -0.59849 | 5.824565 | -1.06214 | 0.289626 | 0.501705 | -6.17823 |
| AC008957.1  | -0.64232 | 4.017733 | -1.06156 | 0.289889 | 0.501945 | -5.64473 |
| AC012254.5  | 1.501425 | 4.955995 | 1.060464 | 0.290387 | 0.50269  | -5.38228 |
| AC091588.2  | -1.82645 | -0.65413 | -1.06008 | 0.290563 | 0.502764 | -5.0532  |
| AL022316.1  | 1.656839 | 5.124199 | 1.060196 | 0.290509 | 0.502764 | -5.37923 |
| UST-AS1     | 1.801539 | 0.575084 | 1.058682 | 0.291196 | 0.503706 | -4.99389 |
| AC011442.1  | 0.625634 | 6.523126 | 1.058581 | 0.291242 | 0.503706 | -6.08535 |
| AC011700.1  | -1.26415 | 1.413681 | -1.05839 | 0.291328 | 0.503739 | -5.19327 |
| AC010185.1  | 2.03238  | -1.21341 | 1.057119 | 0.291907 | 0.504453 | -4.95357 |
| AC046136.1  | 1.924739 | -0.52309 | 1.056738 | 0.29208  | 0.504453 | -4.96547 |
| AL035404.2  | 2.040041 | -0.26307 | 1.056793 | 0.292055 | 0.504453 | -4.97132 |
| AP001922.3  | 1.515034 | 2.399708 | 1.056564 | 0.292159 | 0.504453 | -5.07896 |

|            |          |          |          |          |          |          |
|------------|----------|----------|----------|----------|----------|----------|
| AC010320.4 | 0.832263 | 4.380723 | 1.056578 | 0.292153 | 0.504453 | -5.37104 |
| AL162258.2 | 0.289676 | 6.723314 | 1.056906 | 0.292003 | 0.504453 | -6.22547 |
| AC067852.2 | 0.233833 | 8.910101 | 1.056451 | 0.292211 | 0.504453 | -6.64609 |
| LINC02626  | 1.734065 | 3.223382 | 1.056263 | 0.292296 | 0.504485 | -5.12003 |
| AP003072.4 | -1.75102 | 0.200814 | -1.05595 | 0.292437 | 0.504613 | -5.11358 |
| AC105137.2 | 0.46043  | 5.265518 | 1.054798 | 0.292964 | 0.505405 | -5.72047 |
| AL603839.2 | 1.083542 | 5.911188 | 1.054161 | 0.293255 | 0.505674 | -5.70333 |
| AL031432.3 | -0.38378 | 6.203545 | -1.05421 | 0.293232 | 0.505674 | -6.24624 |
| AC244100.3 | 1.835028 | -1.28118 | 1.053612 | 0.293505 | 0.50599  | -4.95734 |
| AC002558.2 | 0.249166 | 6.785333 | 1.053031 | 0.293771 | 0.506331 | -6.24875 |
| AC009093.5 | 2.005251 | 0.171572 | 1.052262 | 0.294122 | 0.506371 | -4.98385 |
| AC092120.1 | 1.705132 | 2.891821 | 1.051875 | 0.294299 | 0.506371 | -5.10287 |
| AC025166.1 | 2.759813 | 5.035803 | 1.052376 | 0.29407  | 0.506371 | -5.19484 |
| AC005329.3 | -0.73432 | 2.904858 | -1.05197 | 0.294255 | 0.506371 | -5.3759  |
| AC025175.1 | -0.28365 | 6.584884 | -1.05268 | 0.293931 | 0.506371 | -6.31271 |
| AL139289.1 | 0.232685 | 7.270104 | 1.051802 | 0.294333 | 0.506371 | -6.37278 |
| VASH1-AS1  | 0.192131 | 7.577635 | 1.052193 | 0.294154 | 0.506371 | -6.43812 |
| AL691432.2 | -0.25115 | 9.025576 | -1.0522  | 0.294149 | 0.506371 | -6.73486 |
| AC023824.6 | -1.13341 | -0.95759 | -1.05078 | 0.294801 | 0.50706  | -5.03069 |
| AGBL1-AS1  | -1.52351 | -0.43551 | -1.05044 | 0.294956 | 0.50721  | -5.06612 |
| LINC02332  | -1.4237  | 2.024623 | -1.04989 | 0.295209 | 0.507414 | -5.30867 |
| AC005962.1 | -0.72243 | 4.514474 | -1.04994 | 0.295186 | 0.507414 | -5.79206 |
| AL031186.1 | 0.306601 | 7.291863 | 1.049165 | 0.295541 | 0.507868 | -6.36099 |
| AL391421.1 | -0.36552 | 4.817747 | -1.04818 | 0.295992 | 0.508528 | -5.83683 |
| AC009704.2 | 0.467174 | 6.493247 | 1.047343 | 0.296378 | 0.508958 | -6.12126 |
| AC068473.5 | 0.284327 | 8.311601 | 1.047363 | 0.296369 | 0.508958 | -6.5592  |
| AC112176.1 | 1.712075 | -1.22923 | 1.045308 | 0.297315 | 0.510332 | -4.96587 |
| AC090971.5 | -1.04182 | 3.369815 | -1.04542 | 0.297265 | 0.510332 | -5.59057 |
| BOK-AS1    | 1.95576  | 0.574964 | 1.044827 | 0.297536 | 0.510596 | -5.00437 |
| AC073569.1 | 0.260098 | 6.01184  | 1.044448 | 0.297711 | 0.510662 | -6.05321 |
| AC104819.3 | -0.52625 | 6.49168  | -1.04453 | 0.297672 | 0.510662 | -6.34026 |
| AC091132.3 | -0.46758 | 3.963306 | -1.04383 | 0.297995 | 0.510917 | -5.58026 |
| AL161452.1 | 0.427047 | 5.739193 | 1.043537 | 0.298131 | 0.510917 | -5.91503 |
| AC010997.5 | -0.87353 | 4.827616 | -1.0437  | 0.298056 | 0.510917 | -5.97413 |
| AC083880.1 | 0.333375 | 6.950247 | 1.043567 | 0.298118 | 0.510917 | -6.27742 |
| AC104986.2 | -0.24263 | 8.854606 | -1.0433  | 0.298241 | 0.510988 | -6.71112 |
| LINC00482  | -0.60046 | 5.344866 | -1.04309 | 0.298339 | 0.51104  | -6.04688 |
| AC020916.2 | 0.699836 | 6.407861 | 1.042609 | 0.29856  | 0.511301 | -6.10389 |
| TERC       | 1.516488 | 3.42994  | 1.041636 | 0.29901  | 0.511955 | -5.18297 |
| LINC01107  | -1.33908 | -0.09018 | -1.04104 | 0.299287 | 0.512257 | -5.08322 |
| AC079949.2 | 1.036749 | 6.563529 | 1.040961 | 0.299322 | 0.512257 | -5.91671 |
| AC025188.1 | 1.702534 | 2.351616 | 1.040382 | 0.29959  | 0.512365 | -5.0735  |
| AC006064.1 | -0.54267 | 4.21168  | -1.04067 | 0.299459 | 0.512365 | -5.75109 |
| HM13-AS1   | -0.38814 | 6.130105 | -1.04053 | 0.299523 | 0.512365 | -6.21046 |
| AC027307.1 | 0.812581 | 6.282986 | 1.040162 | 0.299692 | 0.512423 | -6.01433 |
| AC092849.1 | 1.203679 | 5.331959 | 1.03999  | 0.299772 | 0.512442 | -5.55019 |
| AC145124.1 | -0.45093 | 5.366277 | -1.03964 | 0.299933 | 0.512602 | -6.01913 |
| AL139393.1 | 2.063833 | 0.335599 | 1.039432 | 0.30003  | 0.51265  | -4.9989  |
| AC136424.1 | -1.4019  | 1.410608 | -1.03929 | 0.300098 | 0.51265  | -5.21935 |
| AP001471.1 | 1.750084 | 0.114042 | 1.038607 | 0.300413 | 0.512722 | -4.99947 |
| AC099521.1 | 1.507679 | 0.518494 | 1.039007 | 0.300227 | 0.512722 | -5.01556 |
| AC110285.5 | 1.832722 | 1.865303 | 1.038652 | 0.300392 | 0.512722 | -5.04942 |
| AC073912.1 | -0.91617 | 3.460097 | -1.03888 | 0.300287 | 0.512722 | -5.5321  |
| AL121601.1 | 0.662465 | 6.344947 | 1.038104 | 0.300646 | 0.513004 | -5.92005 |
| IFT74-AS1  | 1.910782 | -0.18832 | 1.036686 | 0.301305 | 0.513447 | -4.9911  |
| AC009097.1 | 1.798623 | 2.208317 | 1.036959 | 0.301178 | 0.513447 | -5.06872 |
| FAM53B-AS1 | -0.56564 | 3.297973 | -1.03668 | 0.301307 | 0.513447 | -5.41904 |
| AL590428.1 | 0.816601 | 4.558813 | 1.037179 | 0.301076 | 0.513447 | -5.47112 |

|            |          |          |          |          |          |          |
|------------|----------|----------|----------|----------|----------|----------|
| AL161645.1 | -0.97043 | 3.678468 | -1.03666 | 0.301316 | 0.513447 | -5.66837 |
| AC233728.1 | 0.2745   | 6.712978 | 1.037327 | 0.301007 | 0.513447 | -6.25649 |
| AL731569.1 | 0.21409  | 6.090034 | 1.036165 | 0.301547 | 0.513724 | -6.0747  |
| AC015987.1 | 0.367551 | 5.492579 | 1.036014 | 0.301618 | 0.513728 | -5.88696 |
| AC040970.1 | 0.362975 | 7.293481 | 1.035832 | 0.301702 | 0.513755 | -6.35212 |
| AC005363.2 | 1.618489 | 4.461852 | 1.035238 | 0.301978 | 0.513992 | -5.33263 |
| AL117335.1 | 0.502871 | 5.586339 | 1.035272 | 0.301963 | 0.513992 | -5.90053 |
| AL591721.1 | 1.365216 | 4.040091 | 1.034426 | 0.302357 | 0.51452  | -5.23598 |
| Z97206.2   | 1.869103 | -0.0412  | 1.033775 | 0.30266  | 0.514803 | -4.9958  |
| AC010737.1 | 1.974462 | 0.028762 | 1.033812 | 0.302643 | 0.514803 | -4.99618 |
| AC091182.2 | 4.096522 | 5.963908 | 1.033382 | 0.302843 | 0.514881 | -5.19407 |
| AC099522.2 | 0.350063 | 6.745912 | 1.033442 | 0.302815 | 0.514881 | -6.23013 |
| AC010435.1 | -0.25863 | 5.802456 | -1.03293 | 0.303053 | 0.515122 | -6.11643 |
| KCND3-AS1  | -1.59112 | -0.91924 | -1.03267 | 0.303178 | 0.515203 | -5.06576 |
| LINC02344  | -1.39669 | 2.122112 | -1.03254 | 0.303238 | 0.515203 | -5.31241 |
| AC005052.1 | -1.30474 | -0.79711 | -1.03137 | 0.303782 | 0.515894 | -5.05863 |
| AP000873.4 | -0.20237 | 6.771149 | -1.03151 | 0.303717 | 0.515894 | -6.37167 |
| AL118558.3 | -0.27292 | 7.876035 | -1.03108 | 0.303916 | 0.516005 | -6.57537 |
| AC112255.1 | -1.51085 | -1.29518 | -1.03077 | 0.304064 | 0.51614  | -5.04673 |
| AC005779.1 | -0.80316 | 3.890057 | -1.03041 | 0.304232 | 0.516308 | -5.68543 |
| AL021707.3 | 0.204378 | 8.720194 | 1.030217 | 0.304322 | 0.516344 | -6.64053 |
| AC087257.1 | -0.28081 | 5.447555 | -1.03003 | 0.30441  | 0.516376 | -6.00936 |
| AC006272.1 | 1.400096 | 3.231237 | 1.029552 | 0.304633 | 0.516639 | -5.18723 |
| AC020910.1 | -1.10881 | 3.01174  | -1.02917 | 0.304812 | 0.516825 | -5.49597 |
| AC012414.5 | -1.3401  | 0.855548 | -1.029   | 0.304894 | 0.516847 | -5.15886 |
| AC131009.4 | -0.24379 | 7.200094 | -1.02779 | 0.305459 | 0.517688 | -6.45994 |
| LINC01527  | 2.387666 | 2.27645  | 1.027484 | 0.305603 | 0.517699 | -5.05712 |
| FARP1-AS1  | -0.8633  | 4.772642 | -1.02762 | 0.305538 | 0.517699 | -5.94393 |
| AC004923.4 | -0.48523 | 6.791584 | -1.02714 | 0.305765 | 0.517856 | -6.43775 |
| AL513412.1 | -1.05816 | 2.417027 | -1.02663 | 0.306006 | 0.518149 | -5.3602  |
| AL445222.1 | 0.449319 | 7.514319 | 1.025371 | 0.306596 | 0.518867 | -6.40559 |
| AP001527.2 | 0.367439 | 7.532078 | 1.02532  | 0.30662  | 0.518867 | -6.42847 |
| BACH1-IT1  | 0.202678 | 8.029223 | 1.025282 | 0.306638 | 0.518867 | -6.53948 |
| Z82180.1   | 1.625272 | -2.3306  | 1.024576 | 0.30697  | 0.519312 | -4.97643 |
| FRY-AS1    | -1.08741 | 2.236654 | -1.02413 | 0.307182 | 0.519554 | -5.30464 |
| AP003168.2 | 1.523347 | 2.55426  | 1.022554 | 0.307923 | 0.520689 | -5.11591 |
| AL122017.1 | -1.55831 | -0.82835 | -1.02233 | 0.30803  | 0.520754 | -5.075   |
| GFOD1-AS1  | 1.98129  | 1.104479 | 1.022025 | 0.308172 | 0.52076  | -5.03684 |
| AC073072.1 | -1.06926 | 1.861895 | -1.02216 | 0.308107 | 0.52076  | -5.30766 |
| MEIS1-AS3  | 1.681174 | 1.830442 | 1.020378 | 0.30895  | 0.52184  | -5.07254 |
| AC013451.2 | 1.677342 | 2.037797 | 1.020483 | 0.308901 | 0.52184  | -5.09393 |
| AC090425.1 | 0.278195 | 8.468006 | 1.020102 | 0.309081 | 0.521943 | -6.60664 |
| AP000879.2 | 1.528542 | 4.775406 | 1.019833 | 0.309208 | 0.521997 | -5.40863 |
| LINC00519  | 2.735743 | 6.727756 | 1.01974  | 0.309252 | 0.521997 | -5.54796 |
| AC005009.2 | 1.775664 | 0.170962 | 1.018895 | 0.309652 | 0.522555 | -5.01755 |
| PRKX-AS1   | 1.329592 | 3.743521 | 1.018587 | 0.309798 | 0.522568 | -5.23872 |
| AL391839.2 | 1.18867  | 4.582813 | 1.018585 | 0.309798 | 0.522568 | -5.3502  |
| AC092757.2 | 0.35417  | 6.630408 | 1.017829 | 0.310156 | 0.523054 | -6.19382 |
| AC008443.4 | 1.198615 | 5.177526 | 1.017508 | 0.310309 | 0.523106 | -5.56914 |
| AC025043.1 | -0.37401 | 5.787566 | -1.01747 | 0.310327 | 0.523106 | -6.1892  |
| AC093525.8 | -0.20879 | 7.632358 | -1.01711 | 0.310498 | 0.523278 | -6.54435 |
| AL353593.3 | 1.466729 | 4.819811 | 1.016797 | 0.310646 | 0.523312 | -5.44005 |
| AC005921.3 | 0.268712 | 6.193302 | 1.016772 | 0.310658 | 0.523312 | -6.11303 |
| AC087286.1 | -1.1074  | 2.836296 | -1.01594 | 0.311051 | 0.523505 | -5.42238 |
| AC064807.4 | 0.463083 | 6.503211 | 1.016204 | 0.310927 | 0.523505 | -6.204   |
| AC099778.1 | -0.19107 | 6.847009 | -1.01624 | 0.310913 | 0.523505 | -6.39036 |
| AC020915.2 | 0.250526 | 8.353542 | 1.01608  | 0.310986 | 0.523505 | -6.59465 |
| AL021878.2 | -0.18731 | 7.67379  | -1.01571 | 0.311164 | 0.523578 | -6.54945 |

|             |          |          |          |          |          |          |
|-------------|----------|----------|----------|----------|----------|----------|
| AC130448.1  | 1.508907 | -0.46038 | 1.014494 | 0.31174  | 0.524228 | -5.01142 |
| AC136424.2  | 1.385704 | 3.647687 | 1.014574 | 0.311702 | 0.524228 | -5.23919 |
| AC015802.1  | 1.16857  | 5.42331  | 1.014453 | 0.311759 | 0.524228 | -5.6966  |
| LCMT1-AS2   | -0.21863 | 4.485413 | -1.01428 | 0.311841 | 0.524247 | -5.71434 |
| AC008764.10 | -0.53048 | 4.165123 | -1.01397 | 0.311988 | 0.52426  | -5.64595 |
| AC079035.1  | -0.26173 | 5.705439 | -1.01405 | 0.311954 | 0.52426  | -6.11228 |
| AFAP1-AS1   | 1.235838 | 7.558128 | 1.013794 | 0.312073 | 0.524285 | -6.27594 |
| AC090340.1  | 1.174129 | 0.588881 | 1.013203 | 0.312354 | 0.524399 | -5.04805 |
| AL691447.2  | -0.48362 | 4.543133 | -1.01308 | 0.312413 | 0.524399 | -5.79514 |
| AC003956.1  | -0.39746 | 6.573225 | -1.01307 | 0.31242  | 0.524399 | -6.36064 |
| AC002553.2  | -0.21099 | 8.507121 | -1.01315 | 0.312381 | 0.524399 | -6.68332 |
| AC002511.1  | -0.86916 | 4.163672 | -1.01079 | 0.313505 | 0.52608  | -5.73749 |
| AC083964.1  | 0.59183  | 6.870885 | 1.010672 | 0.313561 | 0.52608  | -6.26937 |
| AC007552.2  | -0.86834 | 4.402751 | -1.01028 | 0.31375  | 0.526279 | -5.81736 |
| AC010547.1  | -0.8948  | 1.463654 | -1.00994 | 0.313911 | 0.526431 | -5.21041 |
| AC233976.1  | -1.77373 | -0.85452 | -1.00979 | 0.313985 | 0.526437 | -5.09054 |
| AC025741.1  | -1.61948 | -0.29577 | -1.00955 | 0.314095 | 0.526505 | -5.11203 |
| AL022328.4  | 0.258748 | 6.852727 | 1.009262 | 0.314235 | 0.526622 | -6.33571 |
| AL606970.1  | 1.837574 | 0.088829 | 1.008887 | 0.314414 | 0.526805 | -5.02242 |
| LINC02538   | 1.356622 | 2.082829 | 1.008662 | 0.314522 | 0.526868 | -5.10576 |
| AC130895.1  | -0.59631 | 4.962536 | -1.00806 | 0.314811 | 0.527235 | -5.98945 |
| TTC39C-AS1  | -0.38512 | 5.410425 | -1.00782 | 0.314925 | 0.527308 | -6.06084 |
| NCKAP5-IT1  | 1.916018 | -1.56469 | 1.007186 | 0.315228 | 0.527698 | -4.99234 |
| AC003965.2  | 1.686635 | 7.418671 | 1.006929 | 0.315351 | 0.527787 | -6.04783 |
| LINC00705   | 1.406009 | 2.292399 | 1.006698 | 0.315462 | 0.527855 | -5.11823 |
| AC005005.4  | 0.416474 | 2.469669 | 1.006434 | 0.315589 | 0.527949 | -5.19547 |
| AC084346.1  | 1.580397 | 3.41718  | 1.005149 | 0.316205 | 0.528863 | -5.19976 |
| AC019270.1  | -1.17758 | -0.22051 | -1.00471 | 0.316415 | 0.528978 | -5.10186 |
| ENO1-AS1    | 0.870401 | 5.959515 | 1.004718 | 0.316412 | 0.528978 | -5.77203 |
| AC004490.1  | 0.341962 | 4.399471 | 1.003934 | 0.316789 | 0.529368 | -5.56226 |
| BX537318.1  | 0.268747 | 8.711182 | 1.003981 | 0.316766 | 0.529368 | -6.65857 |
| AC073655.2  | 0.463643 | 6.257372 | 1.002426 | 0.317514 | 0.530461 | -6.08504 |
| AC005387.1  | 0.612539 | 6.060448 | 1.002046 | 0.317698 | 0.53065  | -6.00931 |
| AC079584.2  | 1.835734 | -1.68422 | 1.001762 | 0.317834 | 0.53076  | -4.99656 |
| DLEU2L      | 0.266898 | 5.280314 | 1.0013   | 0.318057 | 0.531014 | -5.84144 |
| AL590705.1  | 1.279816 | 3.748456 | 1.001086 | 0.31816  | 0.531068 | -5.25301 |
| LINC00391   | 1.58457  | -2.46868 | 0.999985 | 0.318691 | 0.531434 | -4.99594 |
| AC023300.2  | 1.836148 | -0.45715 | 0.999751 | 0.318804 | 0.531434 | -5.01704 |
| AL034399.2  | 1.523904 | 2.94816  | 1.000078 | 0.318646 | 0.531434 | -5.15462 |
| TRBV11-2    | 2.012089 | 3.558393 | 0.999833 | 0.318765 | 0.531434 | -5.17328 |
| AC012557.2  | -0.6378  | 5.386838 | -1.00005 | 0.318659 | 0.531434 | -6.02205 |
| AC008735.1  | 0.274946 | 6.424826 | 1.000302 | 0.318538 | 0.531434 | -6.191   |
| AL445933.2  | 2.037236 | 0.202056 | 0.998759 | 0.319283 | 0.531804 | -5.0294  |
| AL079307.1  | 1.362653 | -0.19903 | 0.998772 | 0.319277 | 0.531804 | -5.03376 |
| AC011601.1  | 1.705844 | 4.360004 | 0.998778 | 0.319274 | 0.531804 | -5.32799 |
| LINC02289   | -0.50294 | 3.526607 | -0.99869 | 0.319314 | 0.531804 | -5.46552 |
| KLHL7-DT    | 0.621616 | 5.940386 | 0.998559 | 0.31938  | 0.531804 | -5.94177 |
| SCHLAP1     | 1.769332 | -1.94762 | 0.998005 | 0.319648 | 0.531907 | -4.99877 |
| AC026726.1  | -1.55623 | -0.37371 | -0.99799 | 0.319654 | 0.531907 | -5.11242 |
| AC020915.3  | 0.201321 | 8.985489 | 0.998176 | 0.319565 | 0.531907 | -6.71503 |
| AC026786.2  | -1.60393 | -0.39696 | -0.99748 | 0.3199   | 0.532199 | -5.11953 |
| AC008267.8  | 0.863203 | 3.627256 | 0.99706  | 0.320105 | 0.532421 | -5.30334 |
| AL445493.3  | 1.931883 | -1.44086 | 0.99654  | 0.320356 | 0.532722 | -5.00181 |
| AC006058.3  | 1.850594 | -1.55051 | 0.996041 | 0.320598 | 0.53277  | -5.00162 |
| AP000962.1  | -1.54212 | -0.02555 | -0.99604 | 0.320596 | 0.53277  | -5.14575 |
| AC078960.1  | -1.43086 | 1.793364 | -0.99622 | 0.320511 | 0.53277  | -5.34939 |
| AC090229.1  | 0.494518 | 5.567703 | 0.99466  | 0.321267 | 0.533658 | -5.8914  |
| AL356481.1  | 0.168303 | 7.240338 | 0.994645 | 0.321275 | 0.533658 | -6.42715 |

|            |          |          |          |          |          |          |
|------------|----------|----------|----------|----------|----------|----------|
| AL162424.1 | 1.608037 | 5.270498 | 0.993685 | 0.321741 | 0.534315 | -5.50516 |
| PSG8-AS1   | 1.658944 | -1.11966 | 0.993389 | 0.321885 | 0.534435 | -5.01085 |
| AC000061.1 | 2.141753 | -0.80077 | 0.992995 | 0.322076 | 0.534634 | -5.01003 |
| AC009019.1 | -0.33588 | 4.8947   | -0.99275 | 0.322197 | 0.534717 | -5.87734 |
| AC027020.1 | -0.40618 | 6.163282 | -0.9924  | 0.322365 | 0.53486  | -6.31004 |
| AC009716.1 | -0.38939 | 6.691727 | -0.99228 | 0.322425 | 0.53486  | -6.4128  |
| AL135744.1 | 1.158867 | 3.66775  | 0.99167  | 0.32272  | 0.534862 | -5.27429 |
| AF235103.1 | 1.212273 | 4.308104 | 0.991104 | 0.322996 | 0.534862 | -5.33577 |
| AL121894.2 | 0.337605 | 7.22887  | 0.991201 | 0.322948 | 0.534862 | -6.4018  |
| AC011450.1 | -0.33504 | 6.983982 | -0.99198 | 0.322572 | 0.534862 | -6.47578 |
| AP001381.1 | 0.363933 | 8.091019 | 0.99162  | 0.322745 | 0.534862 | -6.55426 |
| AC025287.3 | -0.21369 | 7.612084 | -0.99117 | 0.322963 | 0.534862 | -6.56337 |
| TBILA      | -0.35159 | 8.170943 | -0.9913  | 0.322899 | 0.534862 | -6.66021 |
| AC067838.1 | -0.24731 | 8.649312 | -0.99147 | 0.322818 | 0.534862 | -6.73286 |
| AL365226.2 | 2.309916 | 7.149139 | 0.990918 | 0.323086 | 0.534894 | -5.72521 |
| AC113382.1 | 0.964445 | 2.883766 | 0.990567 | 0.323257 | 0.534941 | -5.19168 |
| AC138393.3 | 0.236679 | 7.171288 | 0.990579 | 0.323252 | 0.534941 | -6.40154 |
| LINC01563  | -1.42964 | 0.326453 | -0.99023 | 0.323423 | 0.535098 | -5.15372 |
| Z95114.2   | -1.0985  | 0.56496  | -0.98935 | 0.323852 | 0.535454 | -5.16015 |
| AC095031.1 | 1.486537 | 4.009832 | 0.989471 | 0.323792 | 0.535454 | -5.27414 |
| AL353804.2 | -0.50287 | 6.056005 | -0.98953 | 0.323763 | 0.535454 | -6.29545 |
| AP006748.1 | 2.028146 | 0.180772 | 0.988203 | 0.32441  | 0.53616  | -5.03569 |
| AC073548.1 | 0.181421 | 7.384492 | 0.988178 | 0.324422 | 0.53616  | -6.46888 |
| LINC02147  | -1.41709 | -0.1923  | -0.98759 | 0.32471  | 0.536282 | -5.12566 |
| AL512506.2 | 1.207153 | 3.855048 | 0.987789 | 0.324612 | 0.536282 | -5.30333 |
| AL136295.6 | 0.185102 | 8.098721 | 0.987593 | 0.324708 | 0.536282 | -6.58948 |
| AC010619.2 | -0.71449 | 2.901803 | -0.98656 | 0.325215 | 0.536998 | -5.41838 |
| BX248123.1 | 1.713443 | -0.88361 | 0.985789 | 0.32559  | 0.537499 | -5.02043 |
| AL356309.3 | -1.37719 | -2.5032  | -0.98478 | 0.326083 | 0.537722 | -5.0471  |
| AC010247.1 | 1.347006 | 2.844213 | 0.985272 | 0.325843 | 0.537722 | -5.17584 |
| AC130462.1 | 0.969333 | 4.150326 | 0.985095 | 0.32593  | 0.537722 | -5.36895 |
| TPM1-AS    | -0.40954 | 5.54467  | -0.98496 | 0.325995 | 0.537722 | -6.14033 |
| AC012645.1 | 0.325002 | 6.681641 | 0.984885 | 0.326033 | 0.537722 | -6.28057 |
| AC113139.1 | 0.253097 | 8.061283 | 0.98461  | 0.326168 | 0.537744 | -6.57692 |
| AP001547.1 | 2.043993 | -0.27578 | 0.984169 | 0.326384 | 0.537838 | -5.02755 |
| AC026469.1 | 0.976116 | 1.570004 | 0.983799 | 0.326565 | 0.537838 | -5.11531 |
| AC010198.1 | -1.06995 | 1.343384 | -0.98421 | 0.326365 | 0.537838 | -5.2315  |
| AC137894.1 | -0.70258 | 4.935798 | -0.98376 | 0.326583 | 0.537838 | -6.0075  |
| AC017074.1 | 0.537645 | 7.489996 | 0.98381  | 0.32656  | 0.537838 | -6.42687 |
| AL133260.2 | 1.170206 | 4.485195 | 0.983388 | 0.326767 | 0.538005 | -5.46156 |
| RB1-DT     | -0.52022 | 4.254235 | -0.98312 | 0.326899 | 0.538005 | -5.76533 |
| EIF1AX-AS1 | -0.37153 | 6.805834 | -0.98318 | 0.326868 | 0.538005 | -6.45662 |
| AC009229.2 | -1.69295 | -1.1236  | -0.98256 | 0.327172 | 0.538336 | -5.10003 |
| LINC01607  | 1.405386 | 5.14551  | 0.982141 | 0.327379 | 0.538559 | -5.42918 |
| AC102945.1 | 0.863981 | 5.646469 | 0.98191  | 0.327492 | 0.538597 | -5.89109 |
| AC063943.1 | -0.50654 | 5.652084 | -0.9818  | 0.327545 | 0.538597 | -6.16    |
| AC020661.4 | -0.41103 | 3.748473 | -0.98084 | 0.328018 | 0.538902 | -5.56938 |
| AC104699.1 | -0.50208 | 7.160486 | -0.98104 | 0.327918 | 0.538902 | -6.53927 |
| AP000759.1 | 0.293755 | 9.834834 | 0.981157 | 0.327862 | 0.538902 | -6.84654 |
| AP001816.1 | -0.24373 | 10.07835 | -0.98097 | 0.327953 | 0.538902 | -6.95373 |
| AC110921.1 | -1.3083  | 1.359047 | -0.97862 | 0.329114 | 0.540476 | -5.23689 |
| AL603756.1 | -0.22124 | 5.886982 | -0.9786  | 0.32912  | 0.540476 | -6.20163 |
| AC090541.1 | -1.67774 | -1.05113 | -0.97823 | 0.329301 | 0.540656 | -5.10411 |
| TAT-AS1    | 1.632855 | 0.146931 | 0.977874 | 0.329479 | 0.54083  | -5.0522  |
| AC068448.1 | 1.165186 | -0.77118 | 0.97735  | 0.329738 | 0.540971 | -5.04055 |
| AL157702.2 | 1.406843 | 1.795044 | 0.977262 | 0.329781 | 0.540971 | -5.11362 |
| AL360270.3 | 0.456662 | 4.622464 | 0.977264 | 0.32978  | 0.540971 | -5.60139 |
| AC023632.2 | -0.25364 | 5.631783 | -0.97673 | 0.330042 | 0.54128  | -6.10446 |

|            |          |          |          |          |          |          |
|------------|----------|----------|----------|----------|----------|----------|
| AC007608.1 | -1.01124 | 1.60893  | -0.97608 | 0.330367 | 0.541696 | -5.2782  |
| AC073487.1 | -0.1819  | 7.323223 | -0.97582 | 0.330493 | 0.541725 | -6.53127 |
| ACBD3-AS1  | 0.234241 | 8.424351 | 0.975601 | 0.330601 | 0.541725 | -6.653   |
| AC068870.2 | 0.297184 | 9.266593 | 0.97564  | 0.330582 | 0.541725 | -6.7777  |
| LINC02397  | -0.7663  | 1.107558 | -0.97537 | 0.330714 | 0.541792 | -5.19655 |
| LINC00427  | 1.641519 | 1.733616 | 0.974992 | 0.330903 | 0.541982 | -5.11107 |
| AP001160.1 | 0.176424 | 7.4216   | 0.9748   | 0.330998 | 0.54202  | -6.47364 |
| AC234917.1 | 1.795102 | 1.382149 | 0.97457  | 0.331112 | 0.542046 | -5.09256 |
| AC010240.3 | 1.202364 | 3.983241 | 0.974476 | 0.331158 | 0.542046 | -5.34334 |
| AL159174.1 | 1.597961 | -1.65398 | 0.973829 | 0.331478 | 0.542097 | -5.01994 |
| PAN3-AS1   | 0.205142 | 6.976296 | 0.974224 | 0.331283 | 0.542097 | -6.39901 |
| AL391988.1 | -0.31443 | 7.953427 | -0.97403 | 0.33138  | 0.542097 | -6.64848 |
| AP001542.3 | -0.32476 | 9.080929 | -0.97388 | 0.331452 | 0.542097 | -6.82646 |
| AL391832.3 | 1.478145 | 2.255361 | 0.973271 | 0.331755 | 0.542432 | -5.1379  |
| AC019068.1 | 1.776005 | -0.91358 | 0.972066 | 0.332352 | 0.542474 | -5.02909 |
| AL135838.1 | 1.587358 | 1.403884 | 0.972562 | 0.332106 | 0.542474 | -5.09824 |
| AL360014.1 | -1.32579 | -0.09174 | -0.97205 | 0.332358 | 0.542474 | -5.14118 |
| AC022182.2 | 1.251901 | 3.763878 | 0.972667 | 0.332054 | 0.542474 | -5.27685 |
| LINC01433  | -0.53779 | 5.007424 | -0.97253 | 0.33212  | 0.542474 | -6.00534 |
| AC104653.1 | 0.387453 | 5.931934 | 0.972536 | 0.332119 | 0.542474 | -6.05386 |
| AL021707.8 | 0.234976 | 8.286516 | 0.972132 | 0.332319 | 0.542474 | -6.63003 |
| LINC00997  | 0.22671  | 9.533267 | 0.972334 | 0.332219 | 0.542474 | -6.82163 |
| AC011479.3 | 0.251686 | 6.957023 | 0.97189  | 0.332439 | 0.542489 | -6.36357 |
| AL353997.2 | -0.82592 | 2.444268 | -0.97161 | 0.332578 | 0.542598 | -5.39252 |
| AL139193.1 | 1.727198 | -0.6307  | 0.970891 | 0.332935 | 0.543051 | -5.03623 |
| LINC00402  | 1.415274 | -0.6863  | 0.970758 | 0.333001 | 0.543051 | -5.04245 |
| AC004034.1 | 0.485718 | 6.79033  | 0.970588 | 0.333086 | 0.543071 | -6.28039 |
| LINC01258  | 1.514304 | -1.26687 | 0.970086 | 0.333335 | 0.54336  | -5.0282  |
| AC145423.3 | 0.277202 | 7.19403  | 0.969844 | 0.333456 | 0.543439 | -6.41371 |
| AC046168.1 | 1.271718 | -0.17366 | 0.969019 | 0.333866 | 0.543853 | -5.05978 |
| AL162457.1 | -1.36571 | -1.98839 | -0.96885 | 0.333949 | 0.543853 | -5.07544 |
| AC092139.2 | 0.842975 | 4.63813  | 0.968863 | 0.333943 | 0.543853 | -5.55525 |
| AP001107.6 | 0.455312 | 6.376886 | 0.96875  | 0.334    | 0.543853 | -6.17482 |
| AC126365.1 | 0.852306 | 3.443117 | 0.968223 | 0.334262 | 0.544163 | -5.28835 |
| AC009135.2 | 1.558072 | -1.51748 | 0.967329 | 0.334707 | 0.544587 | -5.02675 |
| AL136038.3 | 0.446386 | 4.164186 | 0.967461 | 0.334642 | 0.544587 | -5.49656 |
| AC079336.2 | 0.41558  | 6.398354 | 0.967264 | 0.33474  | 0.544587 | -6.20225 |
| AC011773.2 | -1.68636 | -0.94069 | -0.967   | 0.33487  | 0.54468  | -5.11829 |
| AC099811.4 | 1.441267 | 4.008308 | 0.9665   | 0.335121 | 0.544939 | -5.30782 |
| AL023806.1 | -0.75187 | 2.833097 | -0.96639 | 0.335174 | 0.544939 | -5.48112 |
| AC018761.1 | 2.163536 | 1.954515 | 0.966004 | 0.335368 | 0.545136 | -5.11195 |
| AC008781.3 | 0.537844 | 6.12262  | 0.96542  | 0.335659 | 0.545492 | -6.07342 |
| AC007364.1 | 0.661278 | 5.051492 | 0.965008 | 0.335865 | 0.545708 | -5.59425 |
| GPRACR     | 0.962512 | 1.706904 | 0.96486  | 0.335939 | 0.54571  | -5.13802 |
| AC005828.3 | -1.44037 | -0.53246 | -0.96353 | 0.336604 | 0.546623 | -5.13413 |
| AP000892.1 | 1.162886 | 4.66603  | 0.963445 | 0.336646 | 0.546623 | -5.38477 |
| AC091180.4 | 1.842208 | 2.397383 | 0.962891 | 0.336923 | 0.546955 | -5.139   |
| AC007541.1 | 0.392293 | 5.785641 | 0.962432 | 0.337154 | 0.54721  | -5.99907 |
| AC026979.2 | 0.279633 | 8.508162 | 0.961992 | 0.337374 | 0.547331 | -6.66308 |
| AP002761.4 | 0.617791 | 9.265962 | 0.962098 | 0.337321 | 0.547331 | -6.75258 |
| AP000842.3 | 1.368971 | 1.736856 | 0.96178  | 0.33748  | 0.547385 | -5.12587 |
| AC141424.1 | -0.91023 | 1.899038 | -0.96135 | 0.337694 | 0.547614 | -5.31283 |
| AL356481.3 | 0.237347 | 7.305973 | 0.961173 | 0.337784 | 0.547642 | -6.46915 |
| AC087752.4 | -0.25387 | 6.679415 | -0.95979 | 0.338478 | 0.548411 | -6.42991 |
| AC131212.2 | -0.22048 | 7.375089 | -0.95985 | 0.338446 | 0.548411 | -6.55694 |
| AL023284.4 | 0.365682 | 9.8837   | 0.959939 | 0.338403 | 0.548411 | -6.85828 |
| AC026770.1 | -1.40754 | 0.463799 | -0.95935 | 0.338699 | 0.548651 | -5.19526 |
| DPYD-AS2   | 1.615013 | -0.88368 | 0.957443 | 0.339657 | 0.548902 | -5.04463 |



|            |          |          |          |          |          |          |
|------------|----------|----------|----------|----------|----------|----------|
| AC008883.2 | 1.82787  | -0.4946  | 0.958196 | 0.339279 | 0.548902 | -5.04795 |
| AC100832.2 | 1.667982 | -0.65433 | 0.957546 | 0.339606 | 0.548902 | -5.0481  |
| AC010468.2 | 1.741533 | 0.48372  | 0.958524 | 0.339114 | 0.548902 | -5.07538 |
| AL606537.1 | -1.41024 | -1.52719 | -0.95766 | 0.339549 | 0.548902 | -5.09683 |
| AL356652.1 | -0.53111 | 5.34432  | -0.95752 | 0.339619 | 0.548902 | -6.1184  |
| AL161729.3 | -0.29973 | 7.038257 | -0.95831 | 0.33922  | 0.548902 | -6.49518 |
| AC096586.2 | -0.48032 | 7.573095 | -0.9575  | 0.339629 | 0.548902 | -6.62439 |
| AC093249.6 | 0.209596 | 8.245883 | 0.958494 | 0.339129 | 0.548902 | -6.63848 |
| AC006441.1 | -0.29839 | 8.162819 | -0.95843 | 0.339164 | 0.548902 | -6.6907  |
| AC025181.2 | -0.21876 | 8.818023 | -0.95778 | 0.33949  | 0.548902 | -6.7897  |
| AC010335.1 | 1.36849  | 2.450769 | 0.956319 | 0.340223 | 0.549698 | -5.16827 |
| LINC00052  | 1.530424 | -2.32922 | 0.955647 | 0.340562 | 0.549944 | -5.03103 |
| AL161729.2 | 1.866756 | 1.185937 | 0.955592 | 0.340589 | 0.549944 | -5.09466 |
| AC007431.3 | 1.577809 | 1.836813 | 0.955449 | 0.340662 | 0.549944 | -5.12878 |
| LINC01678  | -0.66145 | 3.764179 | -0.95544 | 0.340668 | 0.549944 | -5.69065 |
| AC093865.1 | 1.851496 | 1.678655 | 0.955113 | 0.340831 | 0.550088 | -5.11581 |
| AC090373.1 | -1.50385 | -1.99093 | -0.95494 | 0.340916 | 0.550107 | -5.08702 |
| AP003500.2 | 1.779677 | 1.879745 | 0.954744 | 0.341017 | 0.550132 | -5.12569 |
| AL022323.1 | -0.34544 | 8.73668  | -0.95462 | 0.341078 | 0.550132 | -6.79728 |
| AC074138.1 | -0.40363 | 6.231668 | -0.95437 | 0.341205 | 0.55022  | -6.38127 |
| AL450226.1 | 1.464623 | 2.334339 | 0.954141 | 0.341321 | 0.550289 | -5.16053 |
| AC011676.5 | -0.46462 | 4.735186 | -0.95343 | 0.341679 | 0.550408 | -5.88044 |
| AC011510.1 | -0.69286 | 5.149886 | -0.95344 | 0.341675 | 0.550408 | -6.1942  |
| AC006064.2 | 0.197931 | 7.251213 | 0.953414 | 0.341688 | 0.550408 | -6.4556  |
| LINC00526  | -0.34816 | 7.459715 | -0.95371 | 0.341539 | 0.550408 | -6.59311 |
| AP001596.1 | -0.61601 | 3.385097 | -0.95309 | 0.341853 | 0.550556 | -5.6239  |
| AC091179.1 | 2.080635 | -0.375   | 0.952374 | 0.342214 | 0.550921 | -5.05208 |
| AC007389.5 | 1.624166 | 1.593589 | 0.952203 | 0.3423   | 0.550921 | -5.11959 |
| AL359220.1 | 0.330223 | 6.353297 | 0.952295 | 0.342254 | 0.550921 | -6.23873 |
| AC108865.2 | 2.013788 | -0.44753 | 0.950919 | 0.34295  | 0.550922 | -5.05194 |
| AC245052.1 | 1.728002 | -0.30682 | 0.950679 | 0.343071 | 0.550922 | -5.06109 |
| AC027808.1 | 1.600312 | -0.40904 | 0.951277 | 0.342769 | 0.550922 | -5.06207 |
| AL391497.1 | 1.538511 | 1.695734 | 0.951852 | 0.342478 | 0.550922 | -5.12614 |
| AL049775.1 | 1.469602 | 2.306679 | 0.950348 | 0.343239 | 0.550922 | -5.15405 |
| AC011595.1 | 0.816265 | 4.60912  | 0.951667 | 0.342571 | 0.550922 | -5.54814 |
| AC073575.1 | 0.853644 | 4.718052 | 0.950984 | 0.342917 | 0.550922 | -5.56968 |
| AL035420.3 | -1.06258 | 3.656872 | -0.95197 | 0.342419 | 0.550922 | -5.66573 |
| AL442067.2 | 1.055188 | 5.301587 | 0.95045  | 0.343187 | 0.550922 | -5.71205 |
| Z97055.2   | -0.61851 | 4.127509 | -0.95032 | 0.343254 | 0.550922 | -5.74535 |
| TH2LCRR    | -0.32314 | 5.703066 | -0.95134 | 0.342734 | 0.550922 | -6.15175 |
| AC022272.1 | -0.4721  | 5.450585 | -0.95034 | 0.343244 | 0.550922 | -6.18188 |
| CR936218.1 | 0.249946 | 8.398038 | 0.950711 | 0.343055 | 0.550922 | -6.67144 |
| AC007040.1 | -0.83241 | 3.412367 | -0.94988 | 0.343475 | 0.551042 | -5.60921 |
| AC006273.1 | 0.572055 | 4.854661 | 0.949966 | 0.343432 | 0.551042 | -5.66386 |
| LINC00551  | -1.37175 | 0.193637 | -0.94973 | 0.343551 | 0.551045 | -5.19672 |
| LINC02587  | 1.797779 | -0.30217 | 0.949348 | 0.343746 | 0.551093 | -5.05982 |
| AL662860.1 | -1.41265 | 0.199159 | -0.94935 | 0.343744 | 0.551093 | -5.18435 |
| AP001160.2 | -0.46619 | 5.627431 | -0.94924 | 0.3438   | 0.551093 | -6.2007  |
| AL390778.2 | -1.54637 | 0.252298 | -0.94884 | 0.344005 | 0.551303 | -5.20495 |
| LINC02404  | 2.00123  | -0.37042 | 0.948205 | 0.344326 | 0.551582 | -5.0552  |
| AC139795.3 | -0.37892 | 6.30209  | -0.94834 | 0.344256 | 0.551582 | -6.35956 |
| AC092447.5 | 1.436145 | -2.45321 | 0.947352 | 0.344759 | 0.551745 | -5.03712 |
| AC010834.2 | 1.556194 | 2.505567 | 0.947328 | 0.344771 | 0.551745 | -5.17214 |
| AC004975.2 | 0.939425 | 5.905916 | 0.947281 | 0.344795 | 0.551745 | -5.93547 |
| CATIP-AS2  | -0.87373 | 4.960929 | -0.94781 | 0.344526 | 0.551745 | -5.96608 |
| AP001271.1 | -0.76342 | 6.996978 | -0.94746 | 0.344703 | 0.551745 | -6.57931 |
| AL161636.1 | 1.635335 | -1.55752 | 0.946063 | 0.345414 | 0.552618 | -5.04166 |
| AC006566.1 | -0.94027 | 3.264611 | -0.94546 | 0.345722 | 0.552994 | -5.57595 |

|              |          |          |          |          |          |          |
|--------------|----------|----------|----------|----------|----------|----------|
| AP005205.2   | 1.883571 | -0.29923 | 0.944569 | 0.346174 | 0.553427 | -5.0638  |
| AC093904.3   | 1.97184  | 3.342763 | 0.94462  | 0.346148 | 0.553427 | -5.20928 |
| AC079807.1   | 0.191842 | 9.325665 | 0.94449  | 0.346214 | 0.553427 | -6.82204 |
| AC005481.1   | 0.931245 | 2.842785 | 0.944115 | 0.346406 | 0.553615 | -5.23476 |
| AL035706.1   | -1.404   | 0.851791 | -0.94396 | 0.346482 | 0.55362  | -5.22354 |
| AP001107.3   | 1.572141 | 3.512198 | 0.943759 | 0.346587 | 0.553626 | -5.24215 |
| AL022341.1   | 0.318603 | 6.917563 | 0.943668 | 0.346633 | 0.553626 | -6.37724 |
| AL590079.1   | 1.488425 | 0.722295 | 0.943305 | 0.346818 | 0.553803 | -5.1006  |
| AL390718.1   | -1.59546 | -0.96333 | -0.94234 | 0.347309 | 0.554351 | -5.13477 |
| AL136980.1   | 0.638355 | 5.422134 | 0.942439 | 0.34726  | 0.554351 | -5.75291 |
| AL512622.1   | -1.55458 | -0.53198 | -0.94169 | 0.347645 | 0.554534 | -5.15368 |
| AC091887.1   | 0.867673 | 5.487297 | 0.941541 | 0.347718 | 0.554534 | -5.70766 |
| AC008894.2   | -0.21802 | 4.513318 | -0.94182 | 0.347574 | 0.554534 | -5.78037 |
| AC008555.4   | 0.414224 | 7.92125  | 0.941973 | 0.347498 | 0.554534 | -6.58429 |
| AC092295.1   | -1.13006 | 2.487953 | -0.94118 | 0.347902 | 0.554709 | -5.43326 |
| AC011477.4   | -1.13706 | 2.056498 | -0.94037 | 0.348318 | 0.555254 | -5.36192 |
| LINC01679    | -0.41982 | 6.957651 | -0.94003 | 0.348491 | 0.555413 | -6.5173  |
| AL731563.2   | 1.317282 | 4.306763 | 0.939675 | 0.348672 | 0.555583 | -5.40524 |
| PRICKLE2-AS2 | -1.54357 | -0.74035 | -0.93939 | 0.348816 | 0.555695 | -5.14451 |
| AC084083.1   | 0.271404 | 6.863377 | 0.93874  | 0.349151 | 0.55611  | -6.3721  |
| AC018529.3   | 0.313647 | 4.190959 | 0.938003 | 0.349529 | 0.556476 | -5.57332 |
| AP000786.1   | 0.524444 | 7.500081 | 0.93807  | 0.349494 | 0.556476 | -6.46054 |
| AC098679.4   | 1.632719 | 0.281472 | 0.936955 | 0.350066 | 0.557213 | -5.09039 |
| AL596223.1   | 1.595819 | 3.289248 | 0.936504 | 0.350297 | 0.557463 | -5.23464 |
| AC100839.1   | 1.319959 | -0.22043 | 0.935727 | 0.350696 | 0.557979 | -5.08316 |
| AC138466.1   | 1.796205 | -0.05515 | 0.934707 | 0.351221 | 0.558563 | -5.07591 |
| AL583810.1   | 0.317479 | 7.023479 | 0.93458  | 0.351286 | 0.558563 | -6.4085  |
| EBLN3P       | -0.16747 | 11.37172 | -0.93474 | 0.351204 | 0.558563 | -7.17357 |
| POC1B-AS1    | -0.23342 | 6.002652 | -0.93384 | 0.351664 | 0.559046 | -6.26452 |
| LINC02031    | 2.214062 | 1.58044  | 0.933543 | 0.351819 | 0.559174 | -5.114   |
| AC010328.1   | 0.908422 | 1.899406 | 0.933193 | 0.351999 | 0.559342 | -5.17874 |
| AC008883.1   | 1.92735  | 0.051618 | 0.932535 | 0.352338 | 0.559526 | -5.07832 |
| AC012291.1   | 1.622594 | 0.919799 | 0.932685 | 0.352261 | 0.559526 | -5.11273 |
| AC006511.3   | -0.19877 | 7.099547 | -0.9326  | 0.352305 | 0.559526 | -6.52951 |
| AC089998.4   | 1.703267 | -0.8149  | 0.93205  | 0.352588 | 0.559804 | -5.06436 |
| AP001189.3   | -0.43635 | 6.565765 | -0.93163 | 0.352806 | 0.560032 | -6.46294 |
| AC092111.2   | -1.13504 | 1.192335 | -0.93139 | 0.352928 | 0.560107 | -5.26727 |
| ANK3-DT      | -1.08008 | 3.489985 | -0.93118 | 0.353036 | 0.560161 | -5.62431 |
| AL136439.1   | 1.560338 | -1.13203 | 0.93036  | 0.35346  | 0.560714 | -5.06064 |
| AC092755.2   | 0.433644 | 6.46868  | 0.929919 | 0.353687 | 0.560956 | -6.25992 |
| AL356019.2   | -0.20449 | 6.415489 | -0.92961 | 0.353847 | 0.561091 | -6.38665 |
| AC051619.7   | -0.8261  | 3.234769 | -0.92927 | 0.354024 | 0.561136 | -5.51383 |
| AC027290.2   | -0.23381 | 7.676243 | -0.92933 | 0.353992 | 0.561136 | -6.63733 |
| AL139041.1   | 0.943116 | 4.985082 | 0.928698 | 0.354318 | 0.561483 | -5.59331 |
| AL360182.2   | 1.682718 | 0.675495 | 0.928506 | 0.354417 | 0.561501 | -5.10486 |
| AL162632.1   | 0.957239 | 4.573941 | 0.928386 | 0.354479 | 0.561501 | -5.57049 |
| AC103564.1   | 1.545319 | 0.418907 | 0.927606 | 0.354882 | 0.561934 | -5.10397 |
| AC006946.2   | -0.72259 | 4.870018 | -0.92742 | 0.354977 | 0.561934 | -6.05111 |
| AC048341.1   | -0.18592 | 6.617659 | -0.92751 | 0.354931 | 0.561934 | -6.42364 |
| AC026725.1   | -1.25818 | -0.00735 | -0.92661 | 0.355396 | 0.56248  | -5.17819 |
| AC002563.1   | 1.213352 | 3.688798 | 0.925354 | 0.356049 | 0.563298 | -5.34024 |
| AC004691.1   | 0.877922 | 4.626144 | 0.925327 | 0.356063 | 0.563298 | -5.58435 |
| AC060809.1   | 1.766959 | -0.69378 | 0.92501  | 0.356228 | 0.56344  | -5.06968 |
| AC010655.4   | 1.540326 | -0.21355 | 0.923434 | 0.357045 | 0.563784 | -5.09012 |
| AL390755.1   | 1.465454 | 1.57339  | 0.923992 | 0.356756 | 0.563784 | -5.14532 |
| AC010336.5   | -1.40505 | -0.17179 | -0.92427 | 0.356611 | 0.563784 | -5.18345 |
| AC008080.4   | -0.93706 | 0.934337 | -0.92384 | 0.356837 | 0.563784 | -5.22441 |
| AP000251.1   | 2.271238 | 4.817904 | 0.924051 | 0.356725 | 0.563784 | -5.35163 |

|            |          |          |          |          |          |          |
|------------|----------|----------|----------|----------|----------|----------|
| AC107464.3 | -0.91766 | 3.28271  | -0.92403 | 0.356739 | 0.563784 | -5.6289  |
| AL645941.1 | 0.8864   | 5.343433 | 0.923453 | 0.357036 | 0.563784 | -5.7952  |
| AC130324.1 | 0.234975 | 6.945996 | 0.923721 | 0.356896 | 0.563784 | -6.40892 |
| AL136962.1 | 1.421684 | 4.130886 | 0.923042 | 0.357249 | 0.563987 | -5.35772 |
| AC103706.1 | 0.44083  | 6.974276 | 0.922407 | 0.357579 | 0.564389 | -6.38302 |
| AC008464.1 | 2.025203 | -0.22919 | 0.922159 | 0.357709 | 0.564475 | -5.07787 |
| AL049870.2 | 1.600689 | 0.055228 | 0.921518 | 0.358042 | 0.564882 | -5.09556 |
| CLYBL-AS2  | 1.409998 | 1.389261 | 0.921326 | 0.358142 | 0.564921 | -5.14241 |
| AC092115.3 | 0.663047 | 6.129586 | 0.920375 | 0.358637 | 0.565583 | -6.04085 |
| AC124798.1 | 0.460446 | 8.466841 | 0.920061 | 0.3588   | 0.565722 | -6.67954 |
| AC079193.2 | -1.05754 | 0.659407 | -0.91962 | 0.359028 | 0.565844 | -5.21655 |
| AC106038.1 | 0.678542 | 2.731475 | 0.919751 | 0.358962 | 0.565844 | -5.28255 |
| AL513534.2 | -0.31548 | 6.737499 | -0.91936 | 0.359166 | 0.565942 | -6.46683 |
| LINC02000  | 1.733962 | -0.40251 | 0.919101 | 0.359301 | 0.566036 | -5.08131 |
| AC090630.1 | 1.661983 | -1.67926 | 0.918639 | 0.359542 | 0.566297 | -5.0611  |
| AC019131.1 | 1.650805 | -0.61783 | 0.918006 | 0.359872 | 0.56658  | -5.0782  |
| AC022509.3 | 0.470151 | 8.039862 | 0.918137 | 0.359804 | 0.56658  | -6.60619 |
| AC127496.3 | -1.04318 | 2.571439 | -0.91762 | 0.360076 | 0.566782 | -5.46291 |
| AC245033.2 | -1.51071 | -1.16701 | -0.91744 | 0.360167 | 0.566807 | -5.14288 |
| AC117500.2 | 0.202616 | 6.962821 | 0.917012 | 0.360392 | 0.567042 | -6.4351  |
| AC174065.1 | -0.97845 | -0.77049 | -0.91611 | 0.360862 | 0.567161 | -5.14251 |
| AC025219.1 | -1.25295 | 2.98771  | -0.91634 | 0.360741 | 0.567161 | -5.56467 |
| AC079949.1 | 1.53802  | 6.599788 | 0.916    | 0.360921 | 0.567161 | -5.89668 |
| AC069200.1 | 0.856674 | 5.771321 | 0.916038 | 0.360901 | 0.567161 | -5.90536 |
| AC011472.5 | 0.248894 | 6.762301 | 0.916713 | 0.360548 | 0.567161 | -6.37743 |
| AC024575.1 | -0.20812 | 6.631544 | -0.91655 | 0.360633 | 0.567161 | -6.43914 |
| AL390195.1 | -0.21715 | 6.105896 | -0.91458 | 0.361666 | 0.568213 | -6.31784 |
| ELFN1-AS1  | 1.349708 | 7.307194 | 0.914388 | 0.361764 | 0.568249 | -6.15213 |
| AF001548.2 | 0.313207 | 9.63195  | 0.913977 | 0.36198  | 0.568468 | -6.88644 |
| AC027601.2 | 0.384458 | 5.193623 | 0.913131 | 0.362423 | 0.569046 | -5.86358 |
| AC021028.1 | 0.846074 | 6.042809 | 0.912895 | 0.362547 | 0.569105 | -6.00277 |
| AC007314.1 | -0.34088 | 5.413854 | -0.91277 | 0.362612 | 0.569105 | -6.15925 |
| AL035634.1 | -0.85362 | 4.062732 | -0.91204 | 0.362996 | 0.569588 | -5.76401 |
| AC018695.4 | 0.204122 | 7.483881 | 0.910885 | 0.363602 | 0.57042  | -6.56405 |
| FAM230I    | -1.43018 | -1.56204 | -0.91019 | 0.363969 | 0.570877 | -5.1328  |
| LINC00659  | -0.98894 | 5.606297 | -0.90985 | 0.364144 | 0.571032 | -6.25257 |
| AC126178.1 | 1.486653 | 0.951615 | 0.909413 | 0.364376 | 0.571276 | -5.13451 |
| AC073316.3 | -0.92754 | 3.258044 | -0.90881 | 0.364692 | 0.571652 | -5.5782  |
| AC126763.1 | 1.407656 | -0.70848 | 0.908381 | 0.364919 | 0.571684 | -5.08898 |
| AP006621.1 | -0.28149 | 5.915969 | -0.90834 | 0.36494  | 0.571684 | -6.27624 |
| AL591895.1 | -0.27672 | 11.00448 | -0.90857 | 0.364821 | 0.571684 | -7.15957 |
| AC087164.2 | 0.488515 | 2.604775 | 0.908105 | 0.365065 | 0.57176  | -5.2885  |
| AC107884.2 | -1.17659 | 1.984343 | -0.90778 | 0.365234 | 0.571906 | -5.38575 |
| AC126768.3 | 1.981858 | 0.643451 | 0.90734  | 0.365468 | 0.57209  | -5.1135  |
| AL365209.1 | 0.901786 | 0.081071 | 0.907272 | 0.365504 | 0.57209  | -5.1244  |
| LINC01901  | 1.924296 | -0.77107 | 0.906717 | 0.365796 | 0.572216 | -5.07857 |
| AC092437.1 | -0.84217 | 3.130126 | -0.90675 | 0.365781 | 0.572216 | -5.53952 |
| NARF-IT1   | 0.251576 | 6.388151 | 0.906686 | 0.365813 | 0.572216 | -6.28422 |
| AC087164.1 | -0.38203 | 3.235632 | -0.90536 | 0.366514 | 0.572883 | -5.50425 |
| AC025575.2 | 2.746875 | 7.297504 | 0.905299 | 0.366545 | 0.572883 | -5.63744 |
| MORC2-AS1  | 0.25188  | 4.513806 | 0.905468 | 0.366456 | 0.572883 | -5.66989 |
| ASAP1-IT2  | 0.205722 | 6.547999 | 0.905718 | 0.366323 | 0.572883 | -6.34794 |
| AL033397.2 | 0.401045 | 7.345942 | 0.904991 | 0.366708 | 0.573019 | -6.50119 |
| AC083806.3 | 1.655525 | 0.187429 | 0.904209 | 0.367121 | 0.573068 | -5.11037 |
| AC010205.1 | -1.48685 | -0.67538 | -0.90464 | 0.366895 | 0.573068 | -5.17097 |
| AC011092.2 | 1.323586 | 2.432808 | 0.904452 | 0.366992 | 0.573068 | -5.21724 |
| AC108676.1 | 0.991397 | 6.289729 | 0.904211 | 0.36712  | 0.573068 | -5.97304 |
| MIR210HG   | 0.406986 | 8.80532  | 0.904519 | 0.366957 | 0.573068 | -6.7604  |

|            |          |          |          |          |          |          |
|------------|----------|----------|----------|----------|----------|----------|
| AC092652.2 | -1.30962 | -0.06148 | -0.90391 | 0.367277 | 0.573193 | -5.19683 |
| LINC01080  | -1.29116 | -2.63082 | -0.90368 | 0.367401 | 0.573268 | -5.1027  |
| AC018552.2 | 1.542431 | 0.428269 | 0.90333  | 0.367586 | 0.573318 | -5.1194  |
| LINC01340  | -1.41461 | -1.28897 | -0.90335 | 0.367574 | 0.573318 | -5.14642 |
| AC105415.1 | -1.26219 | -0.99909 | -0.90267 | 0.367934 | 0.573385 | -5.1541  |
| AC116036.2 | -1.19064 | 2.531062 | -0.90275 | 0.367895 | 0.573385 | -5.45213 |
| AC022973.2 | 0.382601 | 7.146272 | 0.903043 | 0.367738 | 0.573385 | -6.45658 |
| FBXL19-AS1 | 0.295903 | 7.712191 | 0.902798 | 0.367867 | 0.573385 | -6.58331 |
| AC092071.1 | -1.42941 | 0.60482  | -0.90214 | 0.368215 | 0.573704 | -5.23789 |
| AC090515.2 | -0.22102 | 6.108525 | -0.89967 | 0.369524 | 0.575623 | -6.3263  |
| AC053503.1 | -1.4695  | -1.4654  | -0.8991  | 0.369829 | 0.575863 | -5.14698 |
| AC007906.1 | -0.60888 | 4.493204 | -0.89895 | 0.369907 | 0.575863 | -5.94962 |
| AC004877.2 | -0.2511  | 6.615638 | -0.899   | 0.369881 | 0.575863 | -6.47924 |
| AL354977.1 | -0.91266 | 2.896181 | -0.89869 | 0.370046 | 0.57596  | -5.55703 |
| AL110115.2 | 0.688582 | 5.912111 | 0.898523 | 0.370135 | 0.575978 | -6.0445  |
| LINC01315  | -0.36296 | 7.444005 | -0.8981  | 0.370359 | 0.576208 | -6.66708 |
| AC010653.2 | 1.284752 | 0.333    | 0.897069 | 0.370908 | 0.576823 | -5.12947 |
| AC145207.8 | 0.306174 | 7.493117 | 0.897164 | 0.370857 | 0.576823 | -6.54962 |
| LINC01886  | -1.44811 | -1.59851 | -0.89651 | 0.371205 | 0.577141 | -5.14566 |
| AC116025.2 | 0.685133 | 6.300397 | 0.896395 | 0.371266 | 0.577141 | -6.15018 |
| AF130417.1 | 1.809037 | 0.591527 | 0.894724 | 0.372157 | 0.577974 | -5.12697 |
| BX005266.2 | 0.934724 | 2.932716 | 0.895156 | 0.371927 | 0.577974 | -5.30034 |
| ITPK1-AS1  | -0.48009 | 2.830807 | -0.89499 | 0.372017 | 0.577974 | -5.45039 |
| AC009812.3 | -0.34333 | 4.616929 | -0.89462 | 0.37221  | 0.577974 | -5.87303 |
| AP003068.2 | 0.321176 | 8.878102 | 0.894524 | 0.372264 | 0.577974 | -6.77682 |
| AL513165.1 | -0.23609 | 9.906075 | -0.89495 | 0.372036 | 0.577974 | -7.01486 |
| AC012254.1 | 1.883246 | 3.146125 | 0.891642 | 0.373802 | 0.580243 | -5.23966 |
| AC117503.3 | 0.19126  | 5.820624 | 0.891241 | 0.374017 | 0.580457 | -6.14561 |
| AC112236.1 | 1.816658 | 3.060973 | 0.890793 | 0.374256 | 0.580598 | -5.22908 |
| AL035658.1 | -0.63239 | 4.80214  | -0.89078 | 0.374263 | 0.580598 | -6.05943 |
| AC022509.2 | 0.580541 | 6.200247 | 0.890499 | 0.374414 | 0.580713 | -6.16182 |
| CPNE8-AS1  | 1.403898 | 5.989561 | 0.890118 | 0.374618 | 0.580789 | -5.78424 |
| AC244090.1 | -0.21586 | 9.291363 | -0.89022 | 0.374564 | 0.580789 | -6.91436 |
| BASP1-AS1  | 1.149006 | 0.357354 | 0.889901 | 0.374734 | 0.58085  | -5.13906 |
| AC007390.2 | 0.142588 | 6.909568 | 0.889749 | 0.374815 | 0.580856 | -6.46149 |
| SYNJ2-IT1  | -0.94923 | 2.59974  | -0.88813 | 0.375683 | 0.581805 | -5.52142 |
| AL662907.1 | 0.21791  | 6.734774 | 0.888147 | 0.375674 | 0.581805 | -6.41874 |
| GAS6-DT    | -0.35938 | 6.638045 | -0.88803 | 0.375738 | 0.581805 | -6.50529 |
| AC004771.1 | 0.202994 | 7.328351 | 0.888304 | 0.37559  | 0.581805 | -6.54573 |
| PAXIP1-AS1 | 0.248454 | 9.635154 | 0.887207 | 0.376179 | 0.582368 | -6.91663 |
| AC090115.1 | -1.16318 | 1.435918 | -0.88658 | 0.376515 | 0.582646 | -5.32804 |
| RN7SKP23   | -0.17658 | 5.852561 | -0.88644 | 0.376591 | 0.582646 | -6.26804 |
| AC104534.1 | 0.404581 | 8.048494 | 0.886549 | 0.376532 | 0.582646 | -6.64081 |
| AC145285.3 | -0.20699 | 6.778663 | -0.88607 | 0.376791 | 0.582835 | -6.49359 |
| AC107021.1 | 1.218429 | 4.11796  | 0.885533 | 0.377078 | 0.583159 | -5.40489 |
| AC104758.2 | 0.735023 | 5.298678 | 0.885077 | 0.377323 | 0.583418 | -5.82693 |
| AC022915.2 | -0.94405 | 2.036279 | -0.88478 | 0.377484 | 0.583547 | -5.40344 |
| AC104435.2 | 1.523627 | -1.00414 | 0.884389 | 0.377693 | 0.58375  | -5.0979  |
| AL355102.4 | 1.048046 | 4.656874 | 0.883323 | 0.378267 | 0.584517 | -5.63762 |
| AC111170.3 | -0.19493 | 7.349358 | -0.88313 | 0.378369 | 0.584553 | -6.61776 |
| AC105749.1 | 0.285097 | 5.552223 | 0.882646 | 0.378632 | 0.58483  | -6.00031 |
| AC022400.8 | 0.191087 | 10.32269 | 0.882513 | 0.378704 | 0.58483  | -7.02886 |
| AC018845.3 | 0.27906  | 5.698731 | 0.882298 | 0.378819 | 0.584889 | -6.0706  |
| AC005089.1 | 0.766103 | 5.46079  | 0.881764 | 0.379107 | 0.585213 | -5.86502 |
| AC013270.1 | 1.606821 | -0.54692 | 0.881077 | 0.379478 | 0.585545 | -5.10953 |
| AC015804.1 | 1.554448 | 0.30923  | 0.881173 | 0.379426 | 0.585545 | -5.13193 |
| Z85994.1   | 1.620778 | -0.65917 | 0.880063 | 0.380026 | 0.58612  | -5.10636 |
| STARD7-AS1 | 0.153328 | 8.863997 | 0.880045 | 0.380035 | 0.58612  | -6.81368 |

|             |          |          |          |          |          |          |
|-------------|----------|----------|----------|----------|----------|----------|
| AL122035.1  | -0.21819 | 8.926676 | -0.87995 | 0.380085 | 0.58612  | -6.87988 |
| AC010761.7  | -0.93969 | 3.746449 | -0.87943 | 0.380366 | 0.586434 | -5.73957 |
| AC025031.5  | 0.723381 | 2.617844 | 0.878013 | 0.381134 | 0.587497 | -5.28228 |
| AC118658.1  | 1.242249 | 4.188949 | 0.877497 | 0.381413 | 0.587696 | -5.41642 |
| AL137798.1  | -0.93681 | 3.20305  | -0.87749 | 0.38142  | 0.587696 | -5.6542  |
| AC007950.2  | -1.51885 | -0.839   | -0.87687 | 0.381752 | 0.588087 | -5.18784 |
| U73169.1    | -0.33906 | 6.375695 | -0.87659 | 0.381902 | 0.588198 | -6.43512 |
| HS1BP3-IT1  | -0.37749 | 5.944601 | -0.87609 | 0.382174 | 0.588496 | -6.33921 |
| AC109361.2  | 0.967142 | 5.604311 | 0.875827 | 0.382318 | 0.588598 | -5.88211 |
| AC008393.1  | 0.234748 | 7.230784 | 0.875509 | 0.38249  | 0.588742 | -6.53393 |
| AC008972.1  | 0.847039 | 4.76104  | 0.875156 | 0.382682 | 0.588917 | -5.68698 |
| AP005264.6  | 1.525624 | -1.62313 | 0.874695 | 0.382932 | 0.589044 | -5.09394 |
| AL031779.1  | 1.484606 | 2.028578 | 0.874741 | 0.382907 | 0.589044 | -5.20351 |
| AC005865.1  | 0.968856 | 3.798445 | 0.87457  | 0.383    | 0.589044 | -5.43483 |
| AC126773.4  | -0.38429 | 3.979579 | -0.87399 | 0.383313 | 0.589405 | -5.70872 |
| AC004584.3  | -0.38678 | 4.412684 | -0.87362 | 0.383514 | 0.589593 | -5.85222 |
| AC005479.2  | 1.05684  | 5.283942 | 0.873422 | 0.383623 | 0.58964  | -5.71124 |
| AF131215.7  | -0.68423 | 4.91444  | -0.87213 | 0.384326 | 0.5906   | -6.19003 |
| AC022558.3  | 0.177105 | 6.813941 | 0.871724 | 0.384547 | 0.590818 | -6.44632 |
| AC011365.2  | -1.1492  | 1.336631 | -0.87074 | 0.385081 | 0.591507 | -5.34187 |
| AC090181.3  | -0.38554 | 6.675006 | -0.87061 | 0.385153 | 0.591507 | -6.51966 |
| AC025594.2  | 0.469575 | 5.17189  | 0.869948 | 0.385514 | 0.591941 | -5.76773 |
| AC104024.2  | -0.71446 | 3.750622 | -0.86969 | 0.385655 | 0.592036 | -5.71984 |
| AC068792.1  | -0.34577 | 6.676801 | -0.86954 | 0.385737 | 0.592041 | -6.50811 |
| AC109446.4  | 1.227568 | -1.30997 | 0.869134 | 0.385958 | 0.592052 | -5.1079  |
| AC007250.1  | 1.68251  | -0.42569 | 0.8692   | 0.385922 | 0.592052 | -5.11678 |
| AC034111.1  | -0.94188 | 0.383459 | -0.86909 | 0.385981 | 0.592052 | -5.23321 |
| AC068020.1  | 1.55086  | -0.89868 | 0.867809 | 0.386681 | 0.592665 | -5.11164 |
| LINC01481   | 0.665696 | 4.762184 | 0.867894 | 0.386635 | 0.592665 | -5.79207 |
| AC025034.1  | 0.267633 | 6.697586 | 0.868027 | 0.386562 | 0.592665 | -6.40514 |
| AC092354.2  | -0.26976 | 6.37735  | -0.86778 | 0.386695 | 0.592665 | -6.42847 |
| AP001021.1  | -1.58096 | -0.87233 | -0.86713 | 0.387051 | 0.593088 | -5.20663 |
| TM4SF1-AS1  | 0.689509 | 6.719758 | 0.866619 | 0.387331 | 0.593397 | -6.2887  |
| KDM5C-IT1   | 0.793695 | 3.667086 | 0.866344 | 0.387481 | 0.593506 | -5.45009 |
| AC000067.1  | 1.714783 | -0.32455 | 0.864855 | 0.388296 | 0.59432  | -5.12282 |
| IGBP1-AS2   | 0.73487  | 5.409152 | 0.864768 | 0.388344 | 0.59432  | -5.79985 |
| AL357033.1  | -0.45295 | 5.51211  | -0.86467 | 0.388395 | 0.59432  | -6.26065 |
| AC009087.1  | -0.3012  | 6.489897 | -0.86465 | 0.388409 | 0.59432  | -6.47011 |
| AL139260.1  | -0.18495 | 7.332596 | -0.86481 | 0.388318 | 0.59432  | -6.62695 |
| AL138881.1  | 1.651193 | 0.496009 | 0.864073 | 0.388724 | 0.594529 | -5.14752 |
| AC093525.10 | -0.22603 | 5.289703 | -0.86397 | 0.388783 | 0.594529 | -6.11756 |
| AC107032.2  | 0.568446 | 6.269171 | 0.864119 | 0.388699 | 0.594529 | -6.24633 |
| AL365356.1  | -0.26514 | 5.279784 | -0.86361 | 0.388976 | 0.594583 | -6.14575 |
| AC245884.10 | -0.48219 | 6.24264  | -0.86363 | 0.388969 | 0.594583 | -6.45904 |
| AL135936.1  | 1.463073 | 1.562712 | 0.863241 | 0.38918  | 0.594738 | -5.19327 |
| LINC01165   | -1.16131 | -0.07405 | -0.86314 | 0.389236 | 0.594738 | -5.22153 |
| AJ011931.1  | 1.229904 | -1.35919 | 0.862714 | 0.389469 | 0.594974 | -5.10954 |
| AC036214.1  | 1.008335 | 1.80838  | 0.862498 | 0.389588 | 0.595034 | -5.21979 |
| LINC01293   | 1.380776 | 4.061903 | 0.862319 | 0.389686 | 0.595063 | -5.38929 |
| AC005480.1  | -0.18367 | 5.106451 | -0.86182 | 0.389957 | 0.595357 | -6.03974 |
| LINC00235   | 0.276826 | 6.686134 | 0.861582 | 0.39009  | 0.595438 | -6.42494 |
| A2ML1-AS1   | 1.765612 | -0.02889 | 0.860831 | 0.390503 | 0.595858 | -5.13438 |
| AL353622.2  | -0.71815 | 4.068097 | -0.86079 | 0.390524 | 0.595858 | -5.77848 |
| AL049637.1  | 0.767636 | 5.360011 | 0.860588 | 0.390636 | 0.595908 | -5.87854 |
| AC087190.2  | 1.510436 | -0.83681 | 0.860036 | 0.390939 | 0.59625  | -5.11716 |
| LINC01465   | 0.231689 | 6.077462 | 0.85976  | 0.391091 | 0.59636  | -6.24384 |
| AL162727.1  | 1.028922 | 1.605111 | 0.859329 | 0.391328 | 0.596601 | -5.21056 |
| AC034236.3  | -1.24978 | 0.87377  | -0.85915 | 0.391429 | 0.596607 | -5.30362 |

|            |          |          |          |          |          |          |
|------------|----------|----------|----------|----------|----------|----------|
| AC091132.5 | 0.279776 | 6.207199 | 0.859033 | 0.391491 | 0.596607 | -6.29806 |
| AL139005.1 | 0.922527 | 2.955973 | 0.858786 | 0.391627 | 0.596693 | -5.30676 |
| AL023581.1 | 1.56854  | -0.79308 | 0.858108 | 0.392    | 0.596778 | -5.12092 |
| AC078923.1 | -0.72402 | 4.765016 | -0.85852 | 0.391775 | 0.596778 | -5.9975  |
| AL162724.2 | -0.28503 | 7.034664 | -0.85825 | 0.39192  | 0.596778 | -6.59205 |
| AL359076.1 | 0.229951 | 9.577263 | 0.858224 | 0.391936 | 0.596778 | -6.93583 |
| AC100788.2 | 0.270307 | 5.109667 | 0.857897 | 0.392116 | 0.596833 | -5.92423 |
| AC104237.3 | -1.4531  | -1.22321 | -0.85761 | 0.392274 | 0.596841 | -5.18532 |
| AC129492.2 | 0.63867  | 6.957363 | 0.857599 | 0.39228  | 0.596841 | -6.34374 |
| AP001267.4 | -1.07761 | 1.810395 | -0.85702 | 0.392599 | 0.597084 | -5.38047 |
| AC004921.1 | 1.003281 | 4.631949 | 0.857039 | 0.392589 | 0.597084 | -5.56435 |
| AC127537.1 | -0.20676 | 5.355365 | -0.85622 | 0.393043 | 0.597548 | -6.14922 |
| AC004908.3 | -0.23556 | 7.4022   | -0.85618 | 0.393063 | 0.597548 | -6.65297 |
| ARNTL2-AS1 | 0.662203 | 5.292268 | 0.855666 | 0.393346 | 0.597858 | -5.86048 |
| AC008378.1 | -1.36822 | -1.48685 | -0.85544 | 0.39347  | 0.597925 | -5.17437 |
| MCF2L-AS1  | -0.79694 | 8.146632 | -0.85507 | 0.393672 | 0.598112 | -6.84747 |
| AC018904.2 | 1.351909 | -1.63545 | 0.854033 | 0.394248 | 0.598724 | -5.11021 |
| CR559946.2 | 0.362836 | 4.581109 | 0.854021 | 0.394254 | 0.598724 | -5.74795 |
| AC016999.1 | -0.47596 | 5.136967 | -0.85391 | 0.394315 | 0.598724 | -6.12852 |
| AC012173.1 | -0.41567 | 5.920129 | -0.85314 | 0.39474  | 0.599248 | -6.38156 |
| GNA14-AS1  | -0.9645  | 3.162596 | -0.85299 | 0.394825 | 0.599257 | -5.66668 |
| AC097716.1 | 1.797777 | 1.576999 | 0.852243 | 0.395238 | 0.599762 | -5.18846 |
| AC104088.1 | 0.968324 | 7.028812 | 0.851935 | 0.395408 | 0.599899 | -6.30167 |
| AL133445.2 | -0.24583 | 5.602338 | -0.85174 | 0.395515 | 0.59994  | -6.24561 |
| BTG3-AS1   | 0.245991 | 6.488843 | 0.851112 | 0.395864 | 0.600348 | -6.36509 |
| LINC02069  | -1.05779 | -0.53539 | -0.84968 | 0.396656 | 0.600943 | -5.20112 |
| AF038458.2 | 1.322151 | 2.4301   | 0.849705 | 0.396644 | 0.600943 | -5.25029 |
| SMYD3-IT1  | 1.207479 | 4.786452 | 0.850089 | 0.396431 | 0.600943 | -5.5933  |
| AC090197.1 | 0.307692 | 4.494512 | 0.850217 | 0.39636  | 0.600943 | -5.71332 |
| NDUFV2-AS1 | -0.13229 | 7.941681 | -0.84978 | 0.396604 | 0.600943 | -6.73548 |
| STX18-IT1  | -0.892   | 2.524745 | -0.84866 | 0.397224 | 0.601683 | -5.53291 |
| LINC02130  | 1.559224 | -1.71415 | 0.84677  | 0.398273 | 0.602865 | -5.11202 |
| AC073592.5 | 1.399745 | 1.374152 | 0.847007 | 0.398142 | 0.602865 | -5.198   |
| AC102953.2 | 0.266212 | 7.665096 | 0.846675 | 0.398326 | 0.602865 | -6.63204 |
| AC023818.1 | -0.13295 | 7.884532 | -0.84682 | 0.398248 | 0.602865 | -6.72748 |
| WWC2-AS1   | -1.44695 | -1.01784 | -0.84596 | 0.398722 | 0.603146 | -5.20066 |
| AC087276.3 | 0.807429 | 5.41601  | 0.846147 | 0.39862  | 0.603146 | -5.83061 |
| AL513190.1 | -0.21043 | 6.556392 | -0.84591 | 0.398753 | 0.603146 | -6.49149 |
| AC127002.1 | -1.15668 | 1.599098 | -0.84571 | 0.398863 | 0.603191 | -5.36892 |
| AC148477.4 | 1.466024 | -1.62993 | 0.845075 | 0.399217 | 0.603269 | -5.11532 |
| AL138733.1 | 1.152718 | 2.005529 | 0.845041 | 0.399235 | 0.603269 | -5.24008 |
| ZNF197-AS1 | 0.670651 | 5.380784 | 0.845289 | 0.399097 | 0.603269 | -5.81838 |
| AC137630.3 | -0.26069 | 7.023393 | -0.84517 | 0.399166 | 0.603269 | -6.58799 |
| AC092135.2 | -0.78141 | 3.220087 | -0.84461 | 0.399474 | 0.603508 | -5.67681 |
| AC148477.2 | -1.14299 | -0.28662 | -0.8443  | 0.399649 | 0.60353  | -5.22288 |
| AC083841.1 | 1.723783 | 3.988864 | 0.844366 | 0.399611 | 0.60353  | -5.38235 |
| CATIP-AS1  | 1.017877 | 3.73058  | 0.843792 | 0.399932 | 0.603836 | -5.37612 |
| HLCS-IT1   | 1.25925  | 2.501915 | 0.843419 | 0.400139 | 0.604028 | -5.26535 |
| AC090907.1 | 0.596243 | 5.438671 | 0.842312 | 0.400757 | 0.604607 | -5.95224 |
| AC008763.1 | 0.570933 | 6.208721 | 0.842298 | 0.400765 | 0.604607 | -6.16266 |
| AC062037.2 | 0.920558 | 7.290184 | 0.842528 | 0.400636 | 0.604607 | -6.44728 |
| AL049840.2 | -0.20085 | 8.909595 | -0.84215 | 0.40085  | 0.604614 | -6.90399 |
| AC093635.1 | 0.659144 | 5.607903 | 0.840425 | 0.401811 | 0.605821 | -5.96659 |
| USP46-AS1  | -0.19819 | 9.082442 | -0.84055 | 0.401742 | 0.605821 | -6.92925 |
| Z92544.2   | -0.21143 | 6.762275 | -0.84011 | 0.401986 | 0.605963 | -6.55135 |
| AC017048.3 | 1.417363 | 1.21345  | 0.839354 | 0.40241  | 0.605994 | -5.19559 |
| AC093627.7 | -0.99265 | 1.840834 | -0.83939 | 0.402388 | 0.605994 | -5.38959 |
| AL158071.5 | -0.22537 | 5.196113 | -0.83968 | 0.402229 | 0.605994 | -6.07829 |

|              |          |          |          |          |          |          |
|--------------|----------|----------|----------|----------|----------|----------|
| AC023051.1   | -0.31949 | 5.161583 | -0.83952 | 0.402318 | 0.605994 | -6.13458 |
| LINC01715    | -0.25424 | 5.545908 | -0.83973 | 0.402201 | 0.605994 | -6.17033 |
| AL359382.1   | -1.2379  | 2.025341 | -0.83804 | 0.403145 | 0.606858 | -5.4805  |
| AC068389.3   | -0.28783 | 6.031981 | -0.83814 | 0.403089 | 0.606858 | -6.38715 |
| AC087623.2   | 0.251572 | 7.318271 | 0.837867 | 0.403242 | 0.606882 | -6.58083 |
| AL136964.1   | -1.12571 | -0.3388  | -0.8377  | 0.403336 | 0.606902 | -5.22637 |
| AC073115.1   | 1.538499 | -1.09911 | 0.836607 | 0.403948 | 0.607204 | -5.12877 |
| AC004453.2   | -0.68382 | 1.985637 | -0.83651 | 0.404005 | 0.607204 | -5.40788 |
| AC073352.1   | -0.56453 | 4.451083 | -0.83672 | 0.403885 | 0.607204 | -5.93155 |
| AL603839.3   | 0.321533 | 7.1776   | 0.836843 | 0.403816 | 0.607204 | -6.52583 |
| ZNF503-AS2   | -0.32505 | 7.613314 | -0.83648 | 0.404022 | 0.607204 | -6.72647 |
| AC005785.2   | -0.16733 | 8.001566 | -0.83661 | 0.403949 | 0.607204 | -6.76353 |
| AC138123.2   | 1.446069 | -0.81564 | 0.836061 | 0.404255 | 0.607433 | -5.13718 |
| AL158063.1   | -0.50266 | 4.912661 | -0.83582 | 0.404392 | 0.607518 | -6.09011 |
| CFAP58-DT    | 0.639526 | 6.093176 | 0.835599 | 0.404514 | 0.607579 | -6.16858 |
| AC010335.3   | -1.29592 | -0.56417 | -0.83419 | 0.405303 | 0.608529 | -5.22619 |
| AC009560.1   | -1.07156 | 2.317519 | -0.83419 | 0.405308 | 0.608529 | -5.53255 |
| ERVK9-11     | -0.35749 | 4.015713 | -0.83397 | 0.405428 | 0.608588 | -5.80821 |
| CLSTN2-AS1   | 1.229807 | -1.23497 | 0.833782 | 0.405534 | 0.608626 | -5.13275 |
| AL021707.7   | 0.217994 | 7.298281 | 0.833391 | 0.405754 | 0.608834 | -6.57417 |
| AC007365.1   | 0.827655 | 5.268443 | 0.832923 | 0.406017 | 0.609107 | -5.85844 |
| AC243960.3   | -0.5739  | 3.841173 | -0.83245 | 0.406282 | 0.609382 | -5.80122 |
| AC114812.2   | 1.554637 | 2.535136 | 0.83205  | 0.406509 | 0.609601 | -5.25928 |
| LINC01805    | 1.754445 | 0.717474 | 0.831735 | 0.406686 | 0.609745 | -5.17663 |
| OBSCN-AS1    | 0.36403  | 5.42029  | 0.831361 | 0.406896 | 0.609938 | -5.98344 |
| AC025871.1   | 1.384107 | 1.660882 | 0.831072 | 0.407059 | 0.610061 | -5.21984 |
| ANKRD33B-AS1 | -1.36966 | -1.2547  | -0.83063 | 0.407309 | 0.610314 | -5.19913 |
| AC099804.1   | -0.22958 | 6.078356 | -0.82975 | 0.407804 | 0.610934 | -6.38227 |
| AC120057.4   | 1.612879 | 4.703046 | 0.829419 | 0.407991 | 0.611092 | -5.45906 |
| AC109347.1   | 0.188004 | 6.505187 | 0.829218 | 0.408104 | 0.61114  | -6.41169 |
| AC068870.3   | -0.81581 | 1.943858 | -0.82887 | 0.408299 | 0.61131  | -5.41048 |
| AL109917.1   | 0.544002 | 5.766057 | 0.82843  | 0.408549 | 0.611562 | -6.06207 |
| AC005837.1   | 0.462237 | 4.316578 | 0.827152 | 0.409271 | 0.612227 | -5.64672 |
| AC132219.1   | 0.783368 | 4.735841 | 0.827066 | 0.40932  | 0.612227 | -5.72109 |
| AC243919.1   | -0.3402  | 5.959309 | -0.82715 | 0.409272 | 0.612227 | -6.37793 |
| AL031123.2   | 0.323714 | 6.765892 | 0.827288 | 0.409194 | 0.612227 | -6.41487 |
| AP000317.1   | 1.02385  | 3.181018 | 0.826795 | 0.409473 | 0.612287 | -5.37329 |
| AL133215.2   | 0.255649 | 7.403123 | 0.826707 | 0.409523 | 0.612287 | -6.57242 |
| AC011374.1   | 2.150806 | 5.449575 | 0.826257 | 0.409777 | 0.612424 | -5.6159  |
| AC114284.1   | 0.830554 | 4.709728 | 0.826284 | 0.409762 | 0.612424 | -5.62452 |
| AC099066.1   | 1.534926 | 1.418862 | 0.825929 | 0.409963 | 0.612579 | -5.20844 |
| AP002008.1   | 1.375485 | -1.42366 | 0.825676 | 0.410106 | 0.612624 | -5.13209 |
| AC092809.4   | 0.19752  | 5.624352 | 0.825588 | 0.410156 | 0.612624 | -6.12844 |
| Z99289.3     | 1.423157 | -1.24865 | 0.824394 | 0.410832 | 0.613175 | -5.13616 |
| AL161785.2   | -1.27029 | -1.55416 | -0.82444 | 0.410809 | 0.613175 | -5.19049 |
| AC005013.1   | 1.534692 | 1.018711 | 0.824131 | 0.410981 | 0.613175 | -5.19849 |
| AL139397.1   | -0.68569 | 4.283636 | -0.82407 | 0.411014 | 0.613175 | -5.93986 |
| PPP1R12A-AS1 | -0.18445 | 5.888866 | -0.82434 | 0.410861 | 0.613175 | -6.303   |
| U47924.2     | 0.243709 | 7.353385 | 0.824194 | 0.410945 | 0.613175 | -6.59416 |
| INKA2-AS1    | -0.69848 | 2.125576 | -0.8237  | 0.411223 | 0.613364 | -5.42941 |
| AL354694.1   | 1.29236  | 2.513934 | 0.823522 | 0.411326 | 0.613397 | -5.28933 |
| AL590822.1   | -1.09157 | 2.624602 | -0.82248 | 0.411915 | 0.614153 | -5.53312 |
| AL109955.1   | 0.266464 | 5.358804 | 0.822248 | 0.412049 | 0.61423  | -6.04062 |
| AC020658.2   | 0.859895 | 0.215134 | 0.822066 | 0.412152 | 0.614262 | -5.19117 |
| AC103957.2   | 1.408288 | 4.782166 | 0.8217   | 0.41236  | 0.61445  | -5.57156 |
| AJ239328.1   | 0.873203 | 1.814763 | 0.821235 | 0.412624 | 0.614722 | -5.25931 |
| AC069234.4   | -0.49077 | 5.278226 | -0.82037 | 0.413113 | 0.615193 | -6.22836 |
| AC022706.1   | 0.578769 | 6.383071 | 0.820449 | 0.41307  | 0.615193 | -6.24825 |

|            |          |          |          |          |          |          |
|------------|----------|----------|----------|----------|----------|----------|
| AC022150.2 | -0.32743 | 7.707367 | -0.82025 | 0.413185 | 0.615193 | -6.75702 |
| AP000438.1 | -1.32205 | -1.34579 | -0.81944 | 0.413646 | 0.615555 | -5.20163 |
| Z95114.4   | 0.700093 | 1.221441 | 0.819386 | 0.413675 | 0.615555 | -5.2345  |
| AC026355.1 | 1.280595 | 4.826528 | 0.819626 | 0.413538 | 0.615555 | -5.62992 |
| AC103987.2 | 1.506275 | -1.57344 | 0.819108 | 0.413833 | 0.615669 | -5.1326  |
| AC025809.1 | 1.437359 | 0.681291 | 0.818845 | 0.413982 | 0.615769 | -5.19105 |
| BRWD1-IT1  | -0.48675 | 4.755193 | -0.81858 | 0.414134 | 0.615873 | -6.0744  |
| AC096536.1 | 0.703774 | 6.74247  | 0.817977 | 0.414476 | 0.61626  | -6.29865 |
| AC013640.1 | 1.451955 | -0.72622 | 0.817547 | 0.414721 | 0.616378 | -5.1519  |
| AL360169.1 | 1.45641  | 3.447512 | 0.817406 | 0.414802 | 0.616378 | -5.40542 |
| AC027796.1 | -0.38608 | 5.870976 | -0.81761 | 0.414686 | 0.616378 | -6.38146 |
| AC022294.1 | -1.28027 | -1.63515 | -0.81682 | 0.415134 | 0.616505 | -5.19327 |
| AC006238.1 | -0.75565 | 3.660991 | -0.817   | 0.415031 | 0.616505 | -5.7113  |
| AC018553.1 | -0.81672 | 5.999527 | -0.81692 | 0.415079 | 0.616505 | -6.45766 |
| AC010307.3 | 1.205913 | -1.89212 | 0.816418 | 0.415365 | 0.616726 | -5.13306 |
| AC093510.1 | -0.86013 | 2.598133 | -0.81591 | 0.415653 | 0.617032 | -5.53673 |
| MIR31HG    | -0.80725 | 7.20457  | -0.81555 | 0.415858 | 0.617215 | -6.73424 |
| AC116158.2 | 1.32825  | 2.248769 | 0.815013 | 0.416167 | 0.617551 | -5.27162 |
| AL158055.1 | -1.3755  | -1.67393 | -0.81456 | 0.416427 | 0.617815 | -5.20189 |
| AC007032.1 | 0.9711   | 4.242475 | 0.814361 | 0.416539 | 0.617859 | -5.51736 |
| GYG2-AS1   | 1.373426 | -0.18357 | 0.811613 | 0.41811  | 0.619423 | -5.1735  |
| AC016644.1 | 1.259542 | 2.949536 | 0.811754 | 0.418029 | 0.619423 | -5.32192 |
| AC114811.2 | 0.355256 | 3.905797 | 0.811509 | 0.41817  | 0.619423 | -5.60807 |
| DNM1P35    | 0.29584  | 5.060543 | 0.811801 | 0.418003 | 0.619423 | -5.92077 |
| AC005911.1 | 0.369355 | 6.707072 | 0.811901 | 0.417946 | 0.619423 | -6.41091 |
| LINC02298  | 0.320751 | 7.883574 | 0.812235 | 0.417754 | 0.619423 | -6.68868 |
| AL133520.1 | 0.158893 | 8.112519 | 0.811709 | 0.418055 | 0.619423 | -6.75533 |
| AC104809.1 | -1.12597 | -1.69577 | -0.81081 | 0.418569 | 0.619469 | -5.1924  |
| AL138767.3 | 1.42266  | 2.24377  | 0.810872 | 0.418534 | 0.619469 | -5.25909 |
| AC008592.4 | -1.25674 | 0.562642 | -0.81073 | 0.418614 | 0.619469 | -5.2914  |
| AC067930.2 | -0.41926 | 5.048505 | -0.81115 | 0.418375 | 0.619469 | -6.08345 |
| AC009065.8 | 0.146234 | 7.769317 | 0.811104 | 0.418402 | 0.619469 | -6.69623 |
| AC073912.2 | 1.442004 | 2.667271 | 0.810532 | 0.41873  | 0.619519 | -5.2853  |
| AC008494.2 | -0.82856 | 3.969672 | -0.80994 | 0.419069 | 0.619899 | -5.81676 |
| LINC01429  | 0.97609  | 2.744776 | 0.809695 | 0.419209 | 0.619984 | -5.3266  |
| LINC02621  | 1.648853 | 0.982809 | 0.809444 | 0.419353 | 0.620075 | -5.20157 |
| AP000962.2 | -1.10178 | 1.446716 | -0.8088  | 0.419723 | 0.620473 | -5.39311 |
| AC148476.1 | 1.288813 | 3.638194 | 0.808686 | 0.419788 | 0.620473 | -5.40422 |
| AC013356.2 | -0.21434 | 5.626759 | -0.80807 | 0.420143 | 0.620876 | -6.26115 |
| AP000919.2 | -0.62728 | 4.619674 | -0.80727 | 0.4206   | 0.62143  | -5.98792 |
| TDRKH-AS1  | 0.405401 | 5.86565  | 0.806408 | 0.421096 | 0.62204  | -6.14136 |
| AC000403.1 | 0.300227 | 5.522961 | 0.805002 | 0.421905 | 0.623112 | -6.12061 |
| AC020663.1 | -1.12766 | 1.070042 | -0.80456 | 0.422162 | 0.62337  | -5.34687 |
| AC027319.1 | 1.137625 | 3.35752  | 0.803467 | 0.422789 | 0.624101 | -5.38436 |
| AC009095.1 | 0.132809 | 7.332402 | 0.803407 | 0.422824 | 0.624101 | -6.62907 |
| AL513320.1 | 0.236893 | 6.19994  | 0.802737 | 0.42321  | 0.624548 | -6.33202 |
| AC097639.1 | -0.37309 | 6.840971 | -0.80249 | 0.423355 | 0.624639 | -6.60213 |
| AC073651.1 | -0.9422  | 2.963901 | -0.80181 | 0.423743 | 0.62509  | -5.67687 |
| AC006116.6 | -1.23775 | -1.99641 | -0.80084 | 0.424302 | 0.625301 | -5.1909  |
| AC104135.1 | 1.764749 | 3.246707 | 0.801309 | 0.424034 | 0.625301 | -5.31021 |
| AL121574.1 | 1.278139 | 3.278695 | 0.80093  | 0.424252 | 0.625301 | -5.35656 |
| AC026367.1 | -0.41492 | 4.833037 | -0.80118 | 0.424107 | 0.625301 | -6.08653 |
| AC120053.1 | 0.180881 | 9.035358 | 0.801025 | 0.424197 | 0.625301 | -6.90508 |
| AC109927.1 | 1.260383 | 0.902771 | 0.800359 | 0.424582 | 0.625443 | -5.21758 |
| AL512631.1 | 1.217774 | 2.176361 | 0.800206 | 0.424671 | 0.625443 | -5.28544 |
| AC021422.1 | -1.05956 | 1.61537  | -0.8001  | 0.424732 | 0.625443 | -5.40235 |
| AC005757.1 | -0.407   | 5.167426 | -0.80046 | 0.424525 | 0.625443 | -6.17363 |
| LINC02360  | 1.438577 | 0.128088 | 0.799301 | 0.425194 | 0.625656 | -5.18701 |



|             |          |          |          |          |          |          |
|-------------|----------|----------|----------|----------|----------|----------|
| AP003469.3  | 1.325218 | 2.247958 | 0.799238 | 0.42523  | 0.625656 | -5.27926 |
| AP003108.5  | 1.1751   | 4.494356 | 0.799613 | 0.425013 | 0.625656 | -5.5576  |
| AC005534.1  | 0.575122 | 5.869537 | 0.799129 | 0.425293 | 0.625656 | -6.0158  |
| AC005696.1  | 0.281962 | 7.365549 | 0.799405 | 0.425133 | 0.625656 | -6.61084 |
| AC097059.2  | 1.468195 | -0.79387 | 0.798339 | 0.42575  | 0.626206 | -5.16099 |
| AL138689.1  | 0.658552 | 6.641806 | 0.798148 | 0.42586  | 0.626246 | -6.34864 |
| AL162411.1  | -1.22195 | 2.315753 | -0.79799 | 0.425951 | 0.626256 | -5.52488 |
| AL035078.1  | -0.73845 | 2.715563 | -0.79748 | 0.426246 | 0.626567 | -5.52184 |
| AL357507.1  | 1.410505 | -0.97262 | 0.797024 | 0.426511 | 0.626743 | -5.15993 |
| AC003035.1  | -1.00412 | 2.284234 | -0.79684 | 0.426615 | 0.626743 | -5.48979 |
| Z69666.1    | -0.17648 | 6.997171 | -0.79694 | 0.426562 | 0.626743 | -6.60913 |
| BRWD1-AS2   | 0.338136 | 6.254969 | 0.7967   | 0.426699 | 0.626743 | -6.3638  |
| ST20-AS1    | -0.16264 | 7.439343 | -0.79567 | 0.427298 | 0.627499 | -6.69707 |
| AC244517.1  | 0.649791 | 4.344557 | 0.795047 | 0.427658 | 0.627782 | -5.68574 |
| AC080037.1  | 0.744305 | 6.956343 | 0.795086 | 0.427635 | 0.627782 | -6.37432 |
| Z97633.1    | 0.180522 | 5.55896  | 0.794878 | 0.427755 | 0.627804 | -6.10661 |
| AC092168.2  | -0.37567 | 6.990421 | -0.7938  | 0.42838  | 0.628597 | -6.65282 |
| AC016252.1  | -0.72703 | 5.368469 | -0.7935  | 0.428558 | 0.628735 | -6.22938 |
| AC017104.1  | 0.260371 | 6.09115  | 0.793253 | 0.428699 | 0.62882  | -6.31748 |
| AC011676.2  | 1.064922 | 3.44632  | 0.793049 | 0.428818 | 0.628871 | -5.38585 |
| SNCA-AS1    | 1.130689 | -2.2364  | 0.79255  | 0.429107 | 0.628927 | -5.14621 |
| AC011363.1  | -1.10333 | 1.791385 | -0.79259 | 0.429084 | 0.628927 | -5.44202 |
| AC024361.1  | -0.2524  | 6.837022 | -0.79266 | 0.429042 | 0.628927 | -6.59556 |
| AL136090.1  | 1.502056 | -0.91255 | 0.792021 | 0.429415 | 0.628931 | -5.16226 |
| AL139339.2  | 1.001278 | 2.793167 | 0.792141 | 0.429345 | 0.628931 | -5.35353 |
| AP001318.1  | -0.63571 | 3.928136 | -0.79222 | 0.429297 | 0.628931 | -5.87234 |
| AC008555.7  | 0.247371 | 7.674121 | 0.791826 | 0.429528 | 0.628931 | -6.67784 |
| AC009237.15 | -0.53443 | 7.440026 | -0.79191 | 0.429481 | 0.628931 | -6.7653  |
| LINC02617   | 1.446042 | -0.22874 | 0.791178 | 0.429906 | 0.629238 | -5.18356 |
| AC068234.2  | -0.35456 | 5.660932 | -0.79128 | 0.429847 | 0.629238 | -6.32333 |
| AC073592.6  | 1.414835 | 1.165538 | 0.790565 | 0.430262 | 0.629637 | -5.22647 |
| C9orf163    | -0.22744 | 5.690087 | -0.78999 | 0.430597 | 0.630006 | -6.29478 |
| AC127070.1  | -0.75585 | 4.084575 | -0.78967 | 0.430782 | 0.630154 | -5.86556 |
| JMJD1C-AS1  | 0.249184 | 6.873142 | 0.789326 | 0.430984 | 0.630325 | -6.51068 |
| AC009656.1  | 1.388354 | -1.18668 | 0.787501 | 0.432048 | 0.631759 | -5.16085 |
| AC080078.2  | 1.394261 | 0.187005 | 0.78683  | 0.43244  | 0.632086 | -5.19864 |
| AC084757.3  | -0.46912 | 3.056139 | -0.78692 | 0.432389 | 0.632086 | -5.5871  |
| AC108058.1  | 0.342237 | 7.360258 | 0.786406 | 0.432687 | 0.632325 | -6.61186 |
| DGCR11      | 0.196474 | 7.980729 | 0.786158 | 0.432832 | 0.632413 | -6.75016 |
| AL391095.1  | 0.386433 | 5.854611 | 0.784473 | 0.433818 | 0.633606 | -6.16505 |
| AL512625.1  | -0.21101 | 6.201637 | -0.78457 | 0.433764 | 0.633606 | -6.4579  |
| AC008403.4  | 1.302899 | 2.399158 | 0.783358 | 0.43447  | 0.634261 | -5.29576 |
| AC098936.1  | -0.82498 | 1.139872 | -0.78327 | 0.434519 | 0.634261 | -5.34161 |
| C1orf220    | 0.251929 | 6.287874 | 0.783408 | 0.43444  | 0.634261 | -6.35477 |
| AL163192.1  | -0.72307 | 3.686246 | -0.78212 | 0.435193 | 0.635121 | -5.76376 |
| AC092338.2  | 0.471285 | 6.94245  | 0.781972 | 0.435282 | 0.635128 | -6.40738 |
| AL445437.1  | -0.81873 | 2.487562 | -0.78158 | 0.43551  | 0.635337 | -5.52776 |
| AC004233.1  | 1.282583 | 2.536354 | 0.781192 | 0.435739 | 0.635549 | -5.30812 |
| AL590438.1  | -0.67041 | 3.622293 | -0.7802  | 0.436321 | 0.636274 | -5.69592 |
| IRAIN       | 1.492036 | 2.815451 | 0.77935  | 0.43682  | 0.63667  | -5.31079 |
| AP005432.1  | -0.21626 | 5.016569 | -0.7793  | 0.436848 | 0.63667  | -6.04549 |
| AC006277.1  | 0.159897 | 6.335075 | 0.77958  | 0.436686 | 0.63667  | -6.37823 |
| AC115102.1  | 0.223088 | 7.036947 | 0.778859 | 0.437109 | 0.636928 | -6.54529 |
| AC104521.1  | 1.402608 | 2.915243 | 0.778543 | 0.437294 | 0.637075 | -5.33339 |
| AC008752.2  | 1.122991 | 1.84398  | 0.778073 | 0.437571 | 0.63723  | -5.27789 |
| LINC01144   | 0.254947 | 6.318102 | 0.77809  | 0.437561 | 0.63723  | -6.3581  |
| RARA-AS1    | 0.218784 | 8.277876 | 0.777854 | 0.4377   | 0.637295 | -6.80079 |
| AC009229.4  | -1.12717 | -1.63806 | -0.77659 | 0.438443 | 0.638253 | -5.21622 |

|             |          |          |          |          |          |          |
|-------------|----------|----------|----------|----------|----------|----------|
| AC003101.2  | 0.794599 | 5.158576 | 0.776042 | 0.438766 | 0.638599 | -5.80662 |
| AL445307.1  | -1.14974 | 0.377543 | -0.77567 | 0.438986 | 0.638672 | -5.31127 |
| PITPNA-AS1  | 0.239762 | 9.222023 | 0.775735 | 0.438947 | 0.638672 | -6.94356 |
| AL008721.1  | 1.529515 | -0.74791 | 0.774711 | 0.43955  | 0.638901 | -5.17855 |
| AC104458.1  | -1.29061 | -1.64358 | -0.77511 | 0.439315 | 0.638901 | -5.22009 |
| AC007663.2  | 0.985047 | 1.945607 | 0.774535 | 0.439654 | 0.638901 | -5.29382 |
| LINC02265   | -1.05196 | 0.765389 | -0.77476 | 0.439519 | 0.638901 | -5.33394 |
| AL109806.1  | 0.579841 | 4.351554 | 0.774639 | 0.439593 | 0.638901 | -5.62387 |
| AC245884.1  | -0.65125 | 3.838624 | -0.77487 | 0.439455 | 0.638901 | -5.84986 |
| AC108693.2  | -0.4452  | 6.488832 | -0.77431 | 0.439789 | 0.638974 | -6.56694 |
| AC016405.2  | 1.299287 | 4.440051 | 0.772898 | 0.44062  | 0.640057 | -5.52445 |
| AC104134.1  | 0.620864 | 3.24713  | 0.772584 | 0.440805 | 0.640203 | -5.4423  |
| AL157813.1  | 0.683838 | 5.400909 | 0.772009 | 0.441145 | 0.640458 | -5.88842 |
| LINC01770   | 0.306541 | 7.850874 | 0.771998 | 0.441151 | 0.640458 | -6.73293 |
| AC138207.2  | 0.335329 | 6.445705 | 0.77152  | 0.441434 | 0.640744 | -6.39186 |
| Z98200.1    | 0.253018 | 6.10045  | 0.770166 | 0.442234 | 0.641782 | -6.27901 |
| AC135584.1  | 1.439326 | 1.984321 | 0.769285 | 0.442756 | 0.642415 | -5.28398 |
| AC000036.1  | 1.088512 | -0.68023 | 0.768806 | 0.443039 | 0.642702 | -5.19191 |
| HSD17B3-AS1 | 1.183512 | 1.521282 | 0.76861  | 0.443155 | 0.642746 | -5.26549 |
| AC004522.2  | -1.23793 | -0.89008 | -0.76809 | 0.443461 | 0.643061 | -5.25012 |
| AL606491.1  | 0.437463 | 6.3714   | 0.767954 | 0.443544 | 0.643061 | -6.36663 |
| AL021707.2  | 0.182131 | 7.476726 | 0.767502 | 0.443812 | 0.643326 | -6.67728 |
| AC093627.3  | 1.385587 | -1.0321  | 0.766974 | 0.444125 | 0.643407 | -5.17645 |
| AC025262.1  | 1.244492 | 0.940957 | 0.767026 | 0.444094 | 0.643407 | -5.24141 |
| AC069234.5  | -0.35844 | 6.785012 | -0.76717 | 0.444006 | 0.643407 | -6.63576 |
| AL353801.2  | -1.11468 | -1.81222 | -0.76653 | 0.444387 | 0.64353  | -5.21622 |
| AC079316.2  | -0.49275 | 4.025329 | -0.76646 | 0.444427 | 0.64353  | -5.85251 |
| AC027020.2  | -0.24729 | 7.632152 | -0.7664  | 0.444466 | 0.64353  | -6.76951 |
| LINC02422   | 1.234976 | 1.692585 | 0.766176 | 0.444598 | 0.643596 | -5.27119 |
| LINC02148   | 1.212611 | -0.54487 | 0.765242 | 0.445153 | 0.644027 | -5.19474 |
| AL022313.2  | 1.279398 | 3.179242 | 0.765349 | 0.445089 | 0.644027 | -5.3707  |
| AC108516.2  | 1.125438 | 4.488946 | 0.765332 | 0.445099 | 0.644027 | -5.57361 |
| AC010894.4  | -1.10983 | 1.303253 | -0.76498 | 0.445306 | 0.644124 | -5.39819 |
| AP002770.1  | 0.970235 | 3.580492 | 0.764708 | 0.44547  | 0.644162 | -5.46412 |
| AC138932.2  | -0.85177 | 2.179605 | -0.76465 | 0.445503 | 0.644162 | -5.50329 |
| AC005746.2  | 1.014717 | 3.685032 | 0.764111 | 0.445825 | 0.644503 | -5.4609  |
| AL049833.3  | 1.028767 | -1.48605 | 0.763538 | 0.446165 | 0.644747 | -5.17593 |
| AF127577.5  | 1.298502 | 1.131233 | 0.763676 | 0.446083 | 0.644747 | -5.24999 |
| FGF12-AS3   | 1.493571 | 0.237794 | 0.763152 | 0.446394 | 0.644954 | -5.21252 |
| AL807752.4  | 1.31698  | 1.277005 | 0.762583 | 0.446733 | 0.645195 | -5.25512 |
| AC135048.3  | 0.814347 | 5.068171 | 0.762723 | 0.44665  | 0.645195 | -5.80693 |
| AC091132.1  | -0.44146 | 4.142309 | -0.76161 | 0.447315 | 0.645416 | -5.93648 |
| AL356512.1  | 0.187112 | 6.078429 | 0.761762 | 0.447222 | 0.645416 | -6.36312 |
| AC009275.1  | 0.478606 | 6.659208 | 0.761719 | 0.447247 | 0.645416 | -6.41406 |
| AC027644.3  | 0.2116   | 7.934024 | 0.761881 | 0.447151 | 0.645416 | -6.75606 |
| AP001372.2  | 0.232206 | 9.130156 | 0.761856 | 0.447166 | 0.645416 | -6.9389  |
| AC099494.2  | 0.383879 | 6.338479 | 0.761448 | 0.447409 | 0.645427 | -6.37053 |
| AP001267.2  | 0.777444 | 1.933297 | 0.760947 | 0.447707 | 0.645609 | -5.30924 |
| AC009053.2  | -0.22233 | 4.471361 | -0.76104 | 0.44765  | 0.645609 | -5.89657 |
| DISC1-IT1   | 1.099778 | 1.874798 | 0.759845 | 0.448364 | 0.646158 | -5.29296 |
| AC002347.2  | 1.41719  | 3.450661 | 0.759443 | 0.448604 | 0.646158 | -5.3944  |
| AGBL5-AS1   | 0.912237 | 4.144754 | 0.759692 | 0.448455 | 0.646158 | -5.54535 |
| AC010889.1  | 1.159826 | 4.093399 | 0.759553 | 0.448538 | 0.646158 | -5.55582 |
| AL121992.3  | 0.454982 | 6.583678 | 0.759787 | 0.448399 | 0.646158 | -6.39875 |
| AC092119.2  | -0.1862  | 6.645156 | -0.75955 | 0.448539 | 0.646158 | -6.55963 |
| AC010731.2  | 1.666224 | 2.88485  | 0.758474 | 0.449182 | 0.646809 | -5.35219 |
| AC134349.1  | 0.907381 | 4.739971 | 0.758398 | 0.449228 | 0.646809 | -5.62757 |
| AC034102.3  | -0.98763 | 2.001965 | -0.75792 | 0.449511 | 0.647093 | -5.53677 |

|            |          |          |          |          |          |          |
|------------|----------|----------|----------|----------|----------|----------|
| AC023796.2 | -1.27472 | -0.18789 | -0.75748 | 0.449775 | 0.647349 | -5.2915  |
| AC009464.1 | -0.79913 | 2.927896 | -0.75636 | 0.450442 | 0.648185 | -5.61841 |
| BACH1-IT2  | 0.176774 | 6.002111 | 0.755804 | 0.450777 | 0.648543 | -6.32939 |
| AL031770.1 | 0.305859 | 4.856487 | 0.755551 | 0.450928 | 0.648636 | -5.92206 |
| AD000671.3 | 0.289048 | 3.777072 | 0.754506 | 0.451554 | 0.649334 | -5.63384 |
| EP300-AS1  | -0.1688  | 8.050042 | -0.75445 | 0.451587 | 0.649334 | -6.83806 |
| AC003965.1 | 0.951097 | 4.193653 | 0.753654 | 0.452064 | 0.649889 | -5.5385  |
| ACOXL-AS1  | -0.36703 | 3.18019  | -0.7535  | 0.452155 | 0.649889 | -5.61336 |
| AC011815.1 | -0.19503 | 6.803313 | -0.75337 | 0.452232 | 0.649889 | -6.60315 |
| AL357992.1 | -0.87225 | 4.411157 | -0.75258 | 0.452707 | 0.650213 | -6.07238 |
| AC073869.3 | -0.41747 | 4.782943 | -0.75256 | 0.452717 | 0.650213 | -6.11842 |
| AL080250.1 | -0.24826 | 5.801393 | -0.75266 | 0.452661 | 0.650213 | -6.35256 |
| AC078777.1 | 0.296509 | 6.393413 | 0.751814 | 0.453167 | 0.650735 | -6.426   |
| Z95114.3   | -0.37964 | 4.27704  | -0.75139 | 0.45342  | 0.650848 | -5.91571 |
| AC135050.4 | 0.534641 | 5.419236 | 0.751449 | 0.453386 | 0.650848 | -5.98248 |
| AL355490.2 | 0.596891 | 4.995428 | 0.750683 | 0.453846 | 0.651336 | -5.8003  |
| RORB-AS1   | -1.14511 | -1.55963 | -0.74987 | 0.454336 | 0.651859 | -5.23517 |
| Z98885.2   | -0.91916 | 0.752296 | -0.7497  | 0.454434 | 0.651859 | -5.33474 |
| AC079174.2 | -0.16484 | 5.856507 | -0.74964 | 0.454471 | 0.651859 | -6.35619 |
| LINC02310  | 1.541145 | -0.2903  | 0.749436 | 0.454595 | 0.651914 | -5.20354 |
| AL031123.3 | 0.319087 | 6.621145 | 0.749237 | 0.454715 | 0.651961 | -6.43287 |
| AC009955.3 | 1.305484 | 1.92553  | 0.74858  | 0.45511  | 0.652311 | -5.29121 |
| AC003991.2 | 0.393488 | 5.284898 | 0.748542 | 0.455133 | 0.652311 | -6.02517 |
| ETV5-AS1   | 0.979417 | 4.610752 | 0.747709 | 0.455634 | 0.652746 | -5.63999 |
| AC010655.2 | 0.419829 | 5.253442 | 0.747459 | 0.455784 | 0.652746 | -6.09202 |
| AL136038.5 | 0.21695  | 5.864697 | 0.747532 | 0.45574  | 0.652746 | -6.25609 |
| HCG15      | 0.284368 | 6.078388 | 0.747649 | 0.45567  | 0.652746 | -6.31016 |
| AC104365.1 | 0.669016 | 4.350001 | 0.74713  | 0.455982 | 0.652906 | -5.67974 |
| LINC00846  | 1.001657 | 0.427191 | 0.746448 | 0.456393 | 0.653369 | -5.2416  |
| AL512506.1 | 0.795904 | 5.256985 | 0.746099 | 0.456603 | 0.653545 | -5.87216 |
| AC018445.3 | -0.84527 | 0.996706 | -0.7459  | 0.456722 | 0.653591 | -5.37393 |
| PICSAR     | 1.538059 | 4.501684 | 0.744324 | 0.457674 | 0.654487 | -5.54315 |
| KRT7-AS    | 0.924972 | 6.354781 | 0.744286 | 0.457697 | 0.654487 | -6.24257 |
| AC004263.1 | -0.20824 | 5.633877 | -0.74439 | 0.457633 | 0.654487 | -6.30169 |
| AL049780.1 | 0.17037  | 6.746093 | 0.744295 | 0.457691 | 0.654487 | -6.54997 |
| AC079610.1 | 1.049339 | -0.26266 | 0.743853 | 0.457958 | 0.654514 | -5.22063 |
| LINC01509  | -1.21474 | -0.81594 | -0.74399 | 0.457875 | 0.654514 | -5.26899 |
| AL160408.1 | 1.083384 | 2.897641 | 0.743347 | 0.458263 | 0.654514 | -5.39116 |
| NUCB1-AS1  | -0.40643 | 5.492569 | -0.7436  | 0.458112 | 0.654514 | -6.33756 |
| AC024361.3 | 0.318227 | 6.657028 | 0.743567 | 0.45813  | 0.654514 | -6.47747 |
| AC078962.1 | -0.33417 | 7.501509 | -0.74338 | 0.458243 | 0.654514 | -6.77298 |
| AC080013.6 | 0.196926 | 9.382882 | 0.743243 | 0.458326 | 0.654514 | -6.99792 |
| AC001226.1 | 0.937217 | 3.093289 | 0.742946 | 0.458505 | 0.654522 | -5.40851 |
| AC093151.2 | -0.59613 | 4.657182 | -0.743   | 0.458475 | 0.654522 | -6.17091 |
| AL391863.2 | 1.072473 | 2.512077 | 0.741984 | 0.459086 | 0.65519  | -5.34723 |
| LINC02006  | 0.829652 | 4.617425 | 0.741883 | 0.459147 | 0.65519  | -5.71694 |
| AC147651.2 | 1.191434 | 2.408864 | 0.741737 | 0.459236 | 0.655192 | -5.33467 |
| AC008534.1 | 1.104112 | -0.99285 | 0.740855 | 0.459769 | 0.655828 | -5.19971 |
| BARX1-DT   | -0.9619  | 1.688692 | -0.7403  | 0.460106 | 0.656183 | -5.42512 |
| AL355338.1 | -0.24182 | 10.30482 | -0.74005 | 0.460254 | 0.65627  | -7.19174 |
| AC008761.2 | -0.87503 | 2.398526 | -0.73986 | 0.460372 | 0.656315 | -5.57282 |
| AC092171.2 | 0.200761 | 10.16172 | 0.739543 | 0.460563 | 0.656462 | -7.11972 |
| AL354989.1 | 0.187573 | 6.506053 | 0.738962 | 0.460915 | 0.656838 | -6.46218 |
| AL031055.1 | 0.25822  | 5.797527 | 0.736934 | 0.462144 | 0.658465 | -6.26274 |
| AL139385.1 | 0.369763 | 6.705297 | 0.736689 | 0.462293 | 0.658552 | -6.50904 |
| AC002064.1 | -0.97765 | 1.832953 | -0.73607 | 0.46267  | 0.65884  | -5.4552  |
| AC005280.1 | -0.99306 | 2.071872 | -0.73607 | 0.462669 | 0.65884  | -5.50218 |
| AC005674.1 | 1.170411 | 3.303916 | 0.735789 | 0.462839 | 0.658956 | -5.42771 |

|            |          |          |          |          |          |          |
|------------|----------|----------|----------|----------|----------|----------|
| AL513548.1 | 1.110238 | -1.21803 | 0.735171 | 0.463214 | 0.65932  | -5.19994 |
| AC109449.1 | 0.293806 | 5.422607 | 0.734934 | 0.463358 | 0.65932  | -6.15076 |
| AC012170.2 | 0.147659 | 7.861632 | 0.735055 | 0.463284 | 0.65932  | -6.77803 |
| FLNC-AS1   | 1.346552 | -0.6075  | 0.734506 | 0.463618 | 0.659531 | -5.21165 |
| AL607028.1 | 1.064662 | 4.069274 | 0.734242 | 0.463778 | 0.659531 | -5.52848 |
| AL513185.1 | 1.546622 | 4.78637  | 0.734112 | 0.463857 | 0.659531 | -5.55084 |
| AL139407.1 | -0.15494 | 7.274315 | -0.73438 | 0.463694 | 0.659531 | -6.72417 |
| AL117328.2 | 0.677367 | 1.810998 | 0.733789 | 0.464054 | 0.659592 | -5.33302 |
| SMC2-AS1   | 0.447716 | 2.386704 | 0.733609 | 0.464164 | 0.659592 | -5.3921  |
| BACH1-IT3  | 0.748681 | 4.50057  | 0.733658 | 0.464134 | 0.659592 | -5.7871  |
| AC116914.2 | 0.148607 | 8.349788 | 0.733428 | 0.464273 | 0.659623 | -6.8482  |
| AC107021.2 | 0.307607 | 5.682581 | 0.73323  | 0.464394 | 0.659669 | -6.22609 |
| AC107294.1 | -1.07058 | 1.183864 | -0.73253 | 0.464822 | 0.659853 | -5.41931 |
| AL162231.4 | -0.43248 | 2.543412 | -0.73262 | 0.464766 | 0.659853 | -5.5409  |
| AC110619.1 | 0.456433 | 5.33759  | 0.73244  | 0.464875 | 0.659853 | -6.13763 |
| AL139124.1 | -0.4002  | 5.411076 | -0.73245 | 0.46487  | 0.659853 | -6.28264 |
| AC106037.2 | -0.21776 | 8.442962 | -0.73172 | 0.465311 | 0.660348 | -6.91296 |
| AC007608.3 | 0.475588 | 2.819543 | 0.731559 | 0.465411 | 0.660365 | -5.45745 |
| AL121583.1 | -0.22725 | 6.288    | -0.7312  | 0.465632 | 0.660554 | -6.52298 |
| AC016590.3 | 0.348692 | 6.256393 | 0.730767 | 0.465894 | 0.6608   | -6.35533 |
| AL133492.1 | -0.70065 | 1.154295 | -0.73028 | 0.466188 | 0.661093 | -5.36881 |
| ZNF649-AS1 | -0.82968 | 3.00374  | -0.73004 | 0.466336 | 0.661172 | -5.68382 |
| AL359183.1 | -0.21945 | 6.284849 | -0.72976 | 0.466508 | 0.661172 | -6.47793 |
| AC016888.1 | 0.321128 | 10.8958  | 0.729898 | 0.466423 | 0.661172 | -7.21149 |
| AC004223.4 | 0.445831 | 6.416272 | 0.72893  | 0.467014 | 0.661764 | -6.42773 |
| AC104532.2 | -0.24333 | 6.200303 | -0.72767 | 0.467785 | 0.662608 | -6.50362 |
| Z82243.1   | 0.186228 | 8.907357 | 0.727785 | 0.467713 | 0.662608 | -6.94265 |
| CHODL-AS1  | 1.304068 | -1.49166 | 0.727396 | 0.46795  | 0.662641 | -5.19443 |
| FP671120.4 | -0.49349 | 8.655704 | -0.72734 | 0.467985 | 0.662641 | -7.00009 |
| AC113615.1 | -0.84796 | -0.96485 | -0.72672 | 0.468362 | 0.662871 | -5.26078 |
| AC007923.4 | 1.263049 | 1.068129 | 0.726626 | 0.468421 | 0.662871 | -5.27291 |
| AC009884.1 | -0.92693 | 2.246449 | -0.7265  | 0.4685   | 0.662871 | -5.51855 |
| AC126544.1 | -0.52304 | 6.31614  | -0.72651 | 0.468494 | 0.662871 | -6.58422 |
| RUVBL1-AS1 | 0.64443  | 4.233211 | 0.724971 | 0.469433 | 0.664065 | -5.66048 |
| AC007114.1 | -0.21818 | 8.336532 | -0.72422 | 0.469891 | 0.664588 | -6.90138 |
| AL592164.1 | -0.929   | 0.267761 | -0.72405 | 0.469995 | 0.66461  | -5.31886 |
| AC099667.1 | 0.869467 | 4.677833 | 0.723074 | 0.470595 | 0.664634 | -5.67027 |
| AL583785.1 | 0.925294 | 4.91554  | 0.723063 | 0.470601 | 0.664634 | -5.76351 |
| AC020763.3 | 0.19805  | 5.089295 | 0.723014 | 0.470631 | 0.664634 | -6.02744 |
| AC010519.1 | 0.393028 | 6.51291  | 0.723855 | 0.470116 | 0.664634 | -6.42017 |
| AC073575.2 | 0.176056 | 6.972606 | 0.723426 | 0.470379 | 0.664634 | -6.59548 |
| AL451042.1 | 0.290827 | 8.066941 | 0.723071 | 0.470597 | 0.664634 | -6.79631 |
| AC005046.1 | 0.227854 | 8.537093 | 0.723606 | 0.470268 | 0.664634 | -6.88215 |
| AC011481.2 | 0.676464 | 5.558977 | 0.722777 | 0.470777 | 0.664715 | -6.00955 |
| AC008759.2 | 0.915968 | 3.970377 | 0.722491 | 0.470952 | 0.664837 | -5.58383 |
| AC021237.1 | 0.340734 | 3.805815 | 0.721809 | 0.47137  | 0.665302 | -5.63103 |
| HTT-AS     | -1.17485 | -1.17068 | -0.72098 | 0.47188  | 0.665394 | -5.27172 |
| AC091806.1 | 0.614742 | 2.964499 | 0.721454 | 0.471588 | 0.665394 | -5.44767 |
| BX284668.6 | 1.000421 | 3.765848 | 0.721014 | 0.471858 | 0.665394 | -5.5223  |
| AC020658.6 | 0.361539 | 5.235352 | 0.720989 | 0.471873 | 0.665394 | -6.02086 |
| AC004223.2 | 0.469534 | 5.322678 | 0.720836 | 0.471967 | 0.665394 | -6.06481 |
| AC007383.2 | -0.12806 | 8.545229 | -0.72107 | 0.471826 | 0.665394 | -6.93356 |
| AC027601.3 | 0.5741   | 5.713657 | 0.720013 | 0.472472 | 0.665982 | -6.18635 |
| AL360091.2 | 1.095862 | 2.293699 | 0.71969  | 0.472671 | 0.666131 | -5.34621 |
| AC007336.3 | 0.820254 | 2.495271 | 0.71951  | 0.472782 | 0.666131 | -5.37518 |
| Z97192.1   | -0.68059 | 1.807143 | -0.71939 | 0.472855 | 0.666131 | -5.45187 |
| AC008750.4 | 0.643729 | 5.809666 | 0.719263 | 0.472933 | 0.666131 | -6.19504 |
| AP005131.5 | -0.57334 | 6.24424  | -0.71865 | 0.473307 | 0.666533 | -6.50093 |

|              |          |          |          |          |          |          |
|--------------|----------|----------|----------|----------|----------|----------|
| AC107068.1   | -0.14661 | 7.735304 | -0.7182  | 0.473589 | 0.666806 | -6.80901 |
| AL024474.2   | 1.15923  | 1.583624 | 0.717516 | 0.474007 | 0.66727  | -5.29858 |
| AC018682.2   | -0.98369 | 1.494261 | -0.71723 | 0.474184 | 0.667393 | -5.42768 |
| ATG10-IT1    | 1.214325 | -0.00613 | 0.715626 | 0.475171 | 0.668656 | -5.23978 |
| SMARCA5-AS1  | 0.74666  | 3.147834 | 0.71433  | 0.47597  | 0.66953  | -5.45258 |
| AC022819.1   | 0.184033 | 5.004573 | 0.714393 | 0.475931 | 0.66953  | -6.00417 |
| AC120042.1   | 1.250542 | -1.35343 | 0.713788 | 0.476304 | 0.66965  | -5.20515 |
| AC009563.1   | 0.768518 | 3.774046 | 0.713759 | 0.476322 | 0.66965  | -5.54262 |
| AC090579.1   | -0.19748 | 7.118361 | -0.71389 | 0.476238 | 0.66965  | -6.71553 |
| AP000266.1   | 0.753855 | 4.391897 | 0.713448 | 0.476514 | 0.669785 | -5.686   |
| AC004067.1   | 0.169194 | 7.412035 | 0.713313 | 0.476597 | 0.669785 | -6.70577 |
| AC064852.1   | 0.950624 | 2.215492 | 0.712764 | 0.476936 | 0.670137 | -5.3414  |
| AL662907.2   | 0.141922 | 5.594359 | 0.712522 | 0.477085 | 0.670221 | -6.22328 |
| AC008870.3   | 0.774612 | 4.879771 | 0.712126 | 0.47733  | 0.670439 | -5.76753 |
| AC002091.2   | 1.034246 | 5.559759 | 0.711801 | 0.477531 | 0.670596 | -5.8535  |
| LINC01567    | 0.974368 | -0.01084 | 0.711117 | 0.477953 | 0.67087  | -5.24917 |
| LRRC3-DT     | -0.99993 | 0.657376 | -0.71082 | 0.478138 | 0.67087  | -5.35677 |
| RNU6ATAC35P  | -0.95981 | 2.24853  | -0.71132 | 0.477826 | 0.67087  | -5.55115 |
| AC108449.1   | -0.67582 | 4.165748 | -0.71076 | 0.478173 | 0.67087  | -5.91567 |
| AL731563.3   | -0.14001 | 6.236814 | -0.71085 | 0.478119 | 0.67087  | -6.48342 |
| AL158839.1   | 0.890706 | 3.905439 | 0.710224 | 0.478505 | 0.671212 | -5.53806 |
| AC090337.1   | 0.89908  | 1.049657 | 0.709693 | 0.478834 | 0.671422 | -5.28904 |
| AC096540.1   | 0.200132 | 5.983564 | 0.709825 | 0.478752 | 0.671422 | -6.36509 |
| AC068722.2   | 0.730885 | 4.45556  | 0.709213 | 0.479131 | 0.671442 | -5.69697 |
| AL121790.1   | -0.57274 | 3.870054 | -0.70917 | 0.479156 | 0.671442 | -5.92109 |
| AC138207.7   | 0.23898  | 6.017531 | 0.709142 | 0.479175 | 0.671442 | -6.33222 |
| FLJ45513     | 0.231598 | 6.515803 | 0.709092 | 0.479206 | 0.671442 | -6.47935 |
| AC022382.1   | -0.50586 | 4.81825  | -0.70794 | 0.479919 | 0.672317 | -6.18919 |
| AP002892.1   | 1.244474 | -1.07187 | 0.707538 | 0.480169 | 0.672415 | -5.21474 |
| AL024497.1   | 1.29561  | -1.00833 | 0.707546 | 0.480163 | 0.672415 | -5.21591 |
| AL355810.1   | -1.1698  | -1.32781 | -0.70706 | 0.480467 | 0.672708 | -5.2688  |
| EGFR-AS1     | 0.362029 | 5.790419 | 0.706454 | 0.480841 | 0.673105 | -6.24187 |
| AL450344.2   | -0.40968 | 5.544088 | -0.70621 | 0.480989 | 0.673188 | -6.38742 |
| AC010422.4   | -0.24431 | 6.11804  | -0.70602 | 0.481108 | 0.673228 | -6.47032 |
| SCAT8        | -0.60115 | 4.690042 | -0.70433 | 0.482156 | 0.674443 | -6.12845 |
| AL356488.3   | 0.182092 | 6.685429 | 0.704341 | 0.482152 | 0.674443 | -6.52735 |
| AC087521.1   | -0.46443 | 3.376485 | -0.70385 | 0.482458 | 0.67474  | -5.7647  |
| CLDN10-AS1   | 1.310491 | 0.411674 | 0.703374 | 0.482753 | 0.674902 | -5.26094 |
| AC116535.1   | 0.272929 | 5.321166 | 0.703456 | 0.482701 | 0.674902 | -6.08723 |
| AC006033.2   | 0.455077 | 4.485401 | 0.702883 | 0.483058 | 0.675037 | -5.76962 |
| AC079416.2   | -0.29223 | 4.445347 | -0.70278 | 0.483119 | 0.675037 | -5.97755 |
| AC008543.3   | -0.41017 | 5.929409 | -0.703   | 0.482983 | 0.675037 | -6.50153 |
| MANEA-DT     | 0.172072 | 6.259875 | 0.701401 | 0.483979 | 0.675999 | -6.44652 |
| AC120114.3   | 0.174816 | 8.378467 | 0.701387 | 0.483988 | 0.675999 | -6.87863 |
| HLA-DQB1-AS1 | 0.516419 | 7.853111 | 0.700759 | 0.484379 | 0.67642  | -6.72116 |
| AL121852.1   | 0.803983 | 4.215961 | 0.70059  | 0.484484 | 0.676441 | -5.63063 |
| LINC01269    | 0.743183 | 7.132163 | 0.700347 | 0.484636 | 0.676459 | -6.53153 |
| AL354696.1   | -0.26805 | 7.656242 | -0.70028 | 0.484677 | 0.676459 | -6.82353 |
| AC007496.2   | -0.17782 | 5.98969  | -0.69996 | 0.484879 | 0.676615 | -6.44486 |
| AC234781.1   | 0.80394  | 2.174359 | 0.699793 | 0.48498  | 0.676631 | -5.36785 |
| AL049796.1   | 0.215851 | 5.378525 | 0.699313 | 0.48528  | 0.676881 | -6.18797 |
| MBNL1-AS1    | -0.27476 | 7.176025 | -0.69922 | 0.485339 | 0.676881 | -6.7577  |
| LINC02446    | -0.6442  | 4.982554 | -0.69848 | 0.485799 | 0.677396 | -6.19052 |
| AC091117.2   | 0.803191 | 4.042382 | 0.697644 | 0.486321 | 0.677745 | -5.5702  |
| AP000692.2   | 0.263832 | 6.80916  | 0.697658 | 0.486312 | 0.677745 | -6.58569 |
| AL162377.1   | 0.173135 | 7.580529 | 0.697752 | 0.486254 | 0.677745 | -6.75183 |
| AC007163.1   | 0.863364 | 2.787082 | 0.697368 | 0.486493 | 0.67786  | -5.41556 |
| AC012370.1   | 0.515668 | 5.05264  | 0.696354 | 0.487126 | 0.678239 | -5.95797 |

|            |          |          |          |          |          |          |
|------------|----------|----------|----------|----------|----------|----------|
| Z98885.3   | 0.176958 | 5.514688 | 0.696489 | 0.487042 | 0.678239 | -6.224   |
| AC008750.5 | -0.19514 | 7.446191 | -0.69649 | 0.487041 | 0.678239 | -6.77683 |
| AC010503.4 | -0.23973 | 10.93475 | -0.69672 | 0.486896 | 0.678239 | -7.30905 |
| AC105020.1 | -0.1798  | 6.863206 | -0.69597 | 0.487364 | 0.678445 | -6.67391 |
| AL391262.1 | 1.212635 | -0.73998 | 0.695443 | 0.487695 | 0.678683 | -5.23062 |
| AL590666.1 | -0.34602 | 6.792579 | -0.69541 | 0.487716 | 0.678683 | -6.68776 |
| AL136531.1 | 0.181041 | 7.863214 | 0.695074 | 0.487926 | 0.678849 | -6.79857 |
| SEMA6A-AS2 | -0.9786  | 1.868894 | -0.69491 | 0.488026 | 0.678863 | -5.49388 |
| AC067852.3 | -0.16003 | 7.337039 | -0.69461 | 0.488216 | 0.679002 | -6.76095 |
| AC004969.1 | -1.06922 | 0.013556 | -0.69378 | 0.488738 | 0.679602 | -5.33119 |
| AC079209.2 | 1.218135 | 1.374776 | 0.693499 | 0.488911 | 0.679642 | -5.30246 |
| LINC01942  | -1.17131 | -0.21446 | -0.6933  | 0.489038 | 0.679642 | -5.32826 |
| AC002550.2 | 0.155102 | 8.051183 | 0.693377 | 0.488987 | 0.679642 | -6.83866 |
| AC104561.1 | -0.61708 | 4.003033 | -0.69294 | 0.489264 | 0.67983  | -5.87549 |
| AC005697.2 | -0.63207 | 1.838114 | -0.69255 | 0.489505 | 0.680038 | -5.45892 |
| AL513327.3 | -0.36442 | 5.641511 | -0.69176 | 0.49     | 0.680601 | -6.40946 |
| AC069277.1 | 0.859403 | 4.131452 | 0.69063  | 0.490708 | 0.68121  | -5.64265 |
| AC008758.2 | -0.67504 | 3.135641 | -0.69063 | 0.490711 | 0.68121  | -5.72228 |
| AGPAT4-IT1 | 0.266869 | 6.704927 | 0.690854 | 0.490568 | 0.68121  | -6.50777 |
| AL357873.1 | -1.13438 | 0.622193 | -0.69023 | 0.490962 | 0.681432 | -5.41296 |
| AC072039.2 | 0.970343 | 3.863376 | 0.689146 | 0.491639 | 0.682088 | -5.54375 |
| AFDN-DT    | 0.293481 | 6.686226 | 0.689039 | 0.491706 | 0.682088 | -6.54258 |
| AC131159.2 | -0.13517 | 6.341296 | -0.68906 | 0.491695 | 0.682088 | -6.54772 |
| AC018648.1 | 0.369209 | 5.634582 | 0.688772 | 0.491874 | 0.682194 | -6.2171  |
| AC092376.1 | -1.20117 | -1.50156 | -0.68746 | 0.492696 | 0.683082 | -5.27497 |
| LINC02091  | -0.78517 | 2.2717   | -0.68755 | 0.492638 | 0.683082 | -5.56299 |
| AC022431.1 | -1.09187 | -0.40414 | -0.68672 | 0.493163 | 0.683465 | -5.31535 |
| AC136469.2 | 0.457869 | 4.305921 | 0.686457 | 0.493329 | 0.683465 | -5.75175 |
| AL050343.1 | -0.13744 | 6.659505 | -0.68645 | 0.493335 | 0.683465 | -6.62979 |
| AC104447.1 | -0.17071 | 8.40613  | -0.68676 | 0.493139 | 0.683465 | -6.9361  |
| AL032819.1 | 1.119493 | 2.878689 | 0.685673 | 0.493822 | 0.683773 | -5.40541 |
| AP001439.1 | 0.945726 | 3.750275 | 0.685709 | 0.493799 | 0.683773 | -5.53394 |
| AC003973.2 | -0.33665 | 4.332348 | -0.68551 | 0.493922 | 0.683773 | -6.03025 |
| AC009686.2 | -0.28571 | 7.605051 | -0.6856  | 0.493868 | 0.683773 | -6.81594 |
| AC106786.2 | -0.35082 | 5.809129 | -0.68536 | 0.494016 | 0.683777 | -6.43435 |
| Z69720.1   | 0.828151 | 3.651168 | 0.684858 | 0.494335 | 0.684092 | -5.55107 |
| TSPAN9-IT1 | 1.189455 | -0.33588 | 0.684338 | 0.494662 | 0.684233 | -5.24906 |
| AL451069.3 | 0.970817 | 1.44775  | 0.683684 | 0.495074 | 0.684233 | -5.32399 |
| AC023301.1 | -1.03279 | 0.945091 | -0.68388 | 0.494948 | 0.684233 | -5.40442 |
| LIVAR      | 1.287303 | 4.796964 | 0.683825 | 0.494985 | 0.684233 | -5.64387 |
| AC121247.1 | -0.23683 | 5.036366 | -0.68418 | 0.494765 | 0.684233 | -6.12863 |
| AC010754.1 | -0.43046 | 4.813747 | -0.68427 | 0.494707 | 0.684233 | -6.13456 |
| UBXN10-AS1 | -0.61603 | 4.829418 | -0.68375 | 0.495032 | 0.684233 | -6.31257 |
| AL844908.2 | -0.35443 | 5.911611 | -0.68342 | 0.495243 | 0.684341 | -6.46861 |
| AL133284.1 | 0.868585 | 0.302445 | 0.683143 | 0.495415 | 0.684453 | -5.27959 |
| AC010343.3 | -1.02847 | 2.601413 | -0.68249 | 0.495825 | 0.684641 | -5.63326 |
| AL121989.1 | 0.246713 | 5.827214 | 0.682587 | 0.495766 | 0.684641 | -6.27947 |
| AP001574.1 | -0.56895 | 5.200496 | -0.6826  | 0.495758 | 0.684641 | -6.35793 |
| AP001783.1 | 1.358801 | 0.9594   | 0.681676 | 0.49634  | 0.684913 | -5.28945 |
| AC079340.2 | -1.07183 | -0.85744 | -0.68187 | 0.496218 | 0.684913 | -5.29527 |
| AC096564.2 | -0.6202  | 1.91407  | -0.68159 | 0.496392 | 0.684913 | -5.46375 |
| ITIH4-AS1  | -0.95357 | 1.533524 | -0.68154 | 0.496429 | 0.684913 | -5.48335 |
| AC004540.2 | 0.29709  | 5.370261 | 0.681458 | 0.496477 | 0.684913 | -6.10588 |
| LINC01840  | -1.0706  | 0.245541 | -0.68123 | 0.496624 | 0.684989 | -5.3596  |
| AC092384.1 | -0.58148 | 2.517333 | -0.68101 | 0.496763 | 0.685055 | -5.59297 |
| LINC01149  | 0.930767 | -1.42003 | 0.680496 | 0.497085 | 0.685374 | -5.22975 |
| AL139260.2 | 0.732103 | 0.941021 | 0.680351 | 0.497177 | 0.685374 | -5.31072 |
| AC012170.3 | 0.612704 | 6.179436 | 0.680017 | 0.497388 | 0.685539 | -6.19602 |

|             |          |          |          |          |          |          |
|-------------|----------|----------|----------|----------|----------|----------|
| AC100827.4  | 0.466343 | 3.435522 | 0.679283 | 0.497851 | 0.686052 | -5.55932 |
| AL139246.4  | 1.240098 | 3.816126 | 0.679088 | 0.497974 | 0.686096 | -5.53689 |
| AC013549.2  | 1.215434 | 0.113093 | 0.678899 | 0.498094 | 0.686135 | -5.26667 |
| AC020558.1  | 1.005315 | 3.856139 | 0.677741 | 0.498826 | 0.686766 | -5.57862 |
| AC012186.3  | -0.42923 | 4.917617 | -0.67793 | 0.498704 | 0.686766 | -6.19754 |
| AC106028.3  | -0.15308 | 6.806917 | -0.67786 | 0.498752 | 0.686766 | -6.65482 |
| AC090589.2  | 0.752273 | 5.061645 | 0.677086 | 0.499241 | 0.68721  | -5.83966 |
| MORF4L2-AS1 | -0.17859 | 5.927581 | -0.67667 | 0.499501 | 0.687443 | -6.43559 |
| LINC01191   | 0.915534 | 3.005465 | 0.676297 | 0.49974  | 0.687646 | -5.43718 |
| AC243562.3  | -0.74524 | 2.063304 | -0.67587 | 0.50001  | 0.687891 | -5.49623 |
| AC078852.2  | -0.78443 | 2.736276 | -0.67566 | 0.500142 | 0.687947 | -5.66314 |
| AC009159.2  | -0.9564  | 1.77113  | -0.67528 | 0.500386 | 0.688121 | -5.49486 |
| AC068594.1  | 0.292135 | 6.000788 | 0.675174 | 0.500452 | 0.688121 | -6.30824 |
| AP000356.1  | -0.89817 | 2.314786 | -0.6749  | 0.500622 | 0.68823  | -5.5647  |
| LINC02365   | -0.89638 | 2.44525  | -0.67474 | 0.500727 | 0.688248 | -5.59109 |
| AC037198.1  | 0.318184 | 6.915022 | 0.674318 | 0.500994 | 0.688489 | -6.62725 |
| AC109446.3  | -0.54143 | 4.189529 | -0.6739  | 0.50126  | 0.688602 | -6.00493 |
| AC021739.4  | -0.29232 | 5.459773 | -0.67391 | 0.501252 | 0.688602 | -6.31884 |
| LINC01684   | 0.601008 | 1.791056 | 0.673657 | 0.501413 | 0.688648 | -5.36953 |
| AC084032.1  | 0.941456 | 3.386688 | 0.673218 | 0.501692 | 0.688648 | -5.50753 |
| LINC01979   | -0.47368 | 4.363244 | -0.67305 | 0.501798 | 0.688648 | -5.99754 |
| AC135050.1  | -0.12744 | 4.966624 | -0.67304 | 0.501802 | 0.688648 | -6.08669 |
| AC091132.2  | 0.226103 | 6.421309 | 0.67298  | 0.501843 | 0.688648 | -6.50267 |
| AC006077.2  | -0.14257 | 7.546257 | -0.67322 | 0.501689 | 0.688648 | -6.80443 |
| AC092354.1  | 0.901002 | 3.592499 | 0.6719   | 0.502529 | 0.688953 | -5.54724 |
| AC139100.1  | 0.475006 | 5.001079 | 0.671763 | 0.502616 | 0.688953 | -6.02826 |
| AC132219.2  | -0.17819 | 6.467243 | -0.6718  | 0.50259  | 0.688953 | -6.58506 |
| AP4B1-AS1   | -0.18347 | 6.747895 | -0.67222 | 0.502327 | 0.688953 | -6.64874 |
| AC245884.8  | -0.23168 | 7.299549 | -0.67211 | 0.502394 | 0.688953 | -6.7747  |
| AC011451.1  | 0.238081 | 8.142524 | 0.672393 | 0.502215 | 0.688953 | -6.85876 |
| AL139286.2  | 0.328869 | 6.709477 | 0.671498 | 0.502784 | 0.689058 | -6.5378  |
| AC012676.5  | -0.14453 | 8.147554 | -0.67115 | 0.503005 | 0.689235 | -6.90506 |
| AC138028.3  | 1.322191 | -0.71881 | 0.670638 | 0.50333  | 0.689555 | -5.245   |
| AC084782.1  | 0.849462 | -0.20526 | 0.67021  | 0.503603 | 0.689585 | -5.27232 |
| AC020658.5  | 0.987582 | 3.258106 | 0.670294 | 0.503549 | 0.689585 | -5.47998 |
| AC008569.2  | -0.30748 | 6.072292 | -0.67013 | 0.503655 | 0.689585 | -6.52823 |
| AP000240.1  | 0.161408 | 8.797721 | 0.669882 | 0.503811 | 0.689585 | -6.9685  |
| AC024896.1  | -0.1849  | 9.977777 | -0.66994 | 0.503777 | 0.689585 | -7.18444 |
| AP003419.2  | -0.19426 | 7.06708  | -0.6695  | 0.504056 | 0.689669 | -6.73459 |
| AC020978.3  | -0.12658 | 7.323792 | -0.66953 | 0.504038 | 0.689669 | -6.76679 |
| AC104066.2  | -0.89587 | -0.81362 | -0.66915 | 0.504278 | 0.68984  | -5.30297 |
| AL158070.2  | -0.89782 | -0.79702 | -0.66901 | 0.504365 | 0.68984  | -5.30482 |
| AC083843.1  | 1.185822 | 0.464555 | 0.668399 | 0.504755 | 0.690248 | -5.28448 |
| AC104024.1  | -0.6054  | 1.483193 | -0.66636 | 0.506053 | 0.691581 | -5.44545 |
| AC006058.4  | -0.77978 | 2.226239 | -0.66629 | 0.506098 | 0.691581 | -5.58266 |
| AC005072.1  | -0.17524 | 6.993779 | -0.66638 | 0.50604  | 0.691581 | -6.70475 |
| LINC00921   | -0.16236 | 7.129951 | -0.66631 | 0.506087 | 0.691581 | -6.74169 |
| AC097652.1  | 1.083816 | -1.42433 | 0.665905 | 0.506344 | 0.691789 | -5.23344 |
| LINC02253   | 1.679866 | 5.048005 | 0.665764 | 0.506434 | 0.691789 | -5.6602  |
| AC006947.1  | 0.775092 | 4.795123 | 0.665241 | 0.506768 | 0.692119 | -5.90336 |
| AC092384.3  | 0.869976 | -0.07268 | 0.664329 | 0.507349 | 0.692418 | -5.2765  |
| AC026358.1  | -0.89595 | -0.44155 | -0.66432 | 0.507355 | 0.692418 | -5.31837 |
| AP003774.1  | 0.656355 | 2.129876 | 0.664399 | 0.507305 | 0.692418 | -5.39252 |
| AL355001.2  | 0.191742 | 8.760897 | 0.664412 | 0.507297 | 0.692418 | -6.97093 |
| LINC01864   | 0.974663 | -0.16992 | 0.663901 | 0.507623 | 0.692657 | -5.27144 |
| AC135782.3  | -0.19234 | 4.021834 | -0.66304 | 0.508169 | 0.693277 | -5.84106 |
| AC015883.1  | 0.228123 | 7.170599 | 0.662875 | 0.508278 | 0.693299 | -6.67358 |
| AC013472.3  | -0.19652 | 5.384587 | -0.66246 | 0.508542 | 0.693533 | -6.29839 |

|             |          |          |          |          |          |          |
|-------------|----------|----------|----------|----------|----------|----------|
| AC084082.1  | 1.066169 | -1.75695 | 0.661532 | 0.509137 | 0.693667 | -5.22943 |
| LINC00165   | 1.247628 | 1.567065 | 0.66159  | 0.5091   | 0.693667 | -5.32803 |
| AL022393.1  | -0.32599 | 4.69101  | -0.66187 | 0.508922 | 0.693667 | -6.11224 |
| AC011330.2  | 0.202709 | 6.58389  | 0.661749 | 0.508998 | 0.693667 | -6.51901 |
| FAR1-IT1    | -0.39005 | 6.364831 | -0.66139 | 0.50923  | 0.693667 | -6.52221 |
| AC133550.2  | 0.142952 | 7.131673 | 0.661298 | 0.509286 | 0.693667 | -6.68742 |
| ANKRD10-IT1 | 0.19561  | 10.78441 | 0.661988 | 0.508845 | 0.693667 | -7.26212 |
| AL133243.1  | 0.759241 | 4.684939 | 0.660264 | 0.509948 | 0.694442 | -5.81809 |
| AL355102.5  | 0.674372 | 5.446431 | 0.659004 | 0.510754 | 0.695037 | -6.09346 |
| KLF7-IT1    | -0.46826 | 5.233983 | -0.65915 | 0.510662 | 0.695037 | -6.32815 |
| AL022311.1  | -0.09024 | 5.9955   | -0.65905 | 0.510723 | 0.695037 | -6.45055 |
| AC009309.1  | -0.36401 | 7.134722 | -0.65934 | 0.510539 | 0.695037 | -6.76486 |
| AC018442.2  | 0.76448  | 3.789595 | 0.658728 | 0.510932 | 0.695152 | -5.5649  |
| AC120024.1  | 0.658283 | 3.083335 | 0.658218 | 0.511259 | 0.695295 | -5.50631 |
| AL451062.1  | 0.827368 | 4.152617 | 0.657884 | 0.511473 | 0.695295 | -5.61472 |
| LINC00612   | -0.46062 | 3.323686 | -0.65809 | 0.511343 | 0.695295 | -5.71024 |
| AC092119.3  | 0.601625 | 4.56111  | 0.657842 | 0.511499 | 0.695295 | -5.80752 |
| AC069307.1  | 0.20818  | 7.163056 | 0.658295 | 0.511209 | 0.695295 | -6.6747  |
| AL359538.1  | 1.015275 | -1.19343 | 0.656657 | 0.51226  | 0.695813 | -5.24591 |
| LINC02457   | 1.498593 | 0.656126 | 0.656526 | 0.512343 | 0.695813 | -5.28685 |
| AC006600.2  | -0.88759 | -0.10635 | -0.65669 | 0.512238 | 0.695813 | -5.3375  |
| LMF1-AS1    | 0.483935 | 3.46022  | 0.657062 | 0.512    | 0.695813 | -5.60042 |
| AL354993.1  | -0.26052 | 5.850625 | -0.65653 | 0.512343 | 0.695813 | -6.45696 |
| AC099343.3  | 0.153284 | 8.490433 | 0.656358 | 0.512451 | 0.695834 | -6.92833 |
| LINC01555   | 1.006583 | -0.37304 | 0.656141 | 0.51259  | 0.695896 | -5.26797 |
| MAGEA8-AS1  | 1.167919 | 0.465355 | 0.655524 | 0.512987 | 0.696309 | -5.29219 |
| LINC01792   | 0.985945 | -0.58717 | 0.654942 | 0.51336  | 0.696566 | -5.2647  |
| AL591178.1  | -0.90403 | 2.343642 | -0.65494 | 0.513362 | 0.696566 | -5.64642 |
| AL365181.1  | 0.930027 | -0.73248 | 0.653834 | 0.514072 | 0.696729 | -5.26121 |
| ALG9-IT1    | -0.90153 | 0.937531 | -0.65441 | 0.5137   | 0.696729 | -5.4112  |
| AC099811.6  | -0.26278 | 4.615928 | -0.65374 | 0.514131 | 0.696729 | -6.0738  |
| AC007731.3  | -0.35688 | 5.139713 | -0.65376 | 0.51412  | 0.696729 | -6.21521 |
| AL596442.2  | -0.23323 | 5.515927 | -0.65433 | 0.513756 | 0.696729 | -6.35823 |
| LINC02019   | -0.16205 | 5.987857 | -0.65426 | 0.513795 | 0.696729 | -6.48449 |
| AC090970.1  | 0.184036 | 8.121345 | 0.653775 | 0.51411  | 0.696729 | -6.85867 |
| AOAH-IT1    | 1.188868 | -1.47083 | 0.65331  | 0.514409 | 0.696892 | -5.23709 |
| AC079834.2  | 0.628753 | 4.517073 | 0.653267 | 0.514437 | 0.696892 | -5.83853 |
| AC090826.1  | -0.71124 | 0.651504 | -0.65307 | 0.514566 | 0.696941 | -5.38244 |
| AL121772.3  | 0.240066 | 9.261278 | 0.652825 | 0.514721 | 0.697026 | -7.04105 |
| HDAC4-AS1   | -0.19662 | 6.721705 | -0.65258 | 0.514881 | 0.697117 | -6.67183 |
| AC078942.1  | -1.10266 | 0.507048 | -0.65214 | 0.515161 | 0.697344 | -5.38591 |
| AC010973.2  | -0.1543  | 7.654604 | -0.65203 | 0.515234 | 0.697344 | -6.83783 |
| AC090044.1  | -0.97885 | 1.564113 | -0.65158 | 0.515522 | 0.697607 | -5.50172 |
| AL359643.2  | 0.216017 | 4.837097 | 0.651343 | 0.515675 | 0.697689 | -6.02169 |
| AC244197.2  | 0.412774 | 6.544869 | 0.650983 | 0.515907 | 0.697877 | -6.4915  |
| AC009034.1  | -0.329   | 4.656425 | -0.6508  | 0.516025 | 0.69788  | -6.11697 |
| LIMS1-AS1   | -0.15684 | 7.665251 | -0.65069 | 0.516095 | 0.69788  | -6.84615 |
| AC124254.1  | 1.331894 | -1.02952 | 0.649903 | 0.516602 | 0.698301 | -5.24699 |
| AC100847.1  | -0.34448 | 5.532856 | -0.64967 | 0.516754 | 0.698301 | -6.37594 |
| AC106028.2  | -0.30856 | 6.561687 | -0.64974 | 0.516709 | 0.698301 | -6.66869 |
| AC080013.4  | 0.174101 | 8.614093 | 0.649631 | 0.516778 | 0.698301 | -6.95204 |
| AL135925.1  | 0.143607 | 7.887984 | 0.649419 | 0.516915 | 0.69836  | -6.83729 |
| LINC00485   | -0.88854 | -1.63057 | -0.64888 | 0.51726  | 0.69845  | -5.28527 |
| LINC02084   | 0.634537 | 4.578443 | 0.648897 | 0.517251 | 0.69845  | -5.75599 |
| AC011479.2  | 0.294453 | 6.557151 | 0.649129 | 0.517101 | 0.69845  | -6.54122 |
| AC004973.1  | 1.07159  | -0.44775 | 0.648622 | 0.517428 | 0.698551 | -5.26843 |
| ESRG        | 1.166215 | 3.047537 | 0.647847 | 0.517929 | 0.699101 | -5.43826 |
| AC022274.1  | 0.821672 | 4.057359 | 0.646755 | 0.518633 | 0.699927 | -5.6452  |



|             |          |          |          |          |          |          |
|-------------|----------|----------|----------|----------|----------|----------|
| AC010809.3  | -0.61814 | 3.341576 | -0.64646 | 0.518826 | 0.700061 | -5.76527 |
| AL359922.2  | 0.451287 | 6.121473 | 0.64606  | 0.519082 | 0.700281 | -6.39016 |
| AC147651.1  | 0.331026 | 5.668907 | 0.645235 | 0.519615 | 0.70075  | -6.28686 |
| AC027228.1  | -0.35656 | 5.5865   | -0.64523 | 0.519617 | 0.70075  | -6.42833 |
| AL031651.2  | 0.794938 | 4.797967 | 0.644598 | 0.520027 | 0.701178 | -5.81816 |
| AC089999.2  | -0.18638 | 6.649123 | -0.64393 | 0.52046  | 0.701635 | -6.65635 |
| AC002472.1  | 1.138242 | -1.89467 | 0.643237 | 0.520908 | 0.701988 | -5.23548 |
| AL162595.1  | 0.205472 | 7.243471 | 0.643303 | 0.520865 | 0.701988 | -6.70533 |
| AL032821.1  | 1.139091 | 0.047342 | 0.642924 | 0.52111  | 0.702009 | -5.28652 |
| AL133553.1  | -1.02797 | 0.873679 | -0.64293 | 0.521107 | 0.702009 | -5.41648 |
| LINC01843   | -0.65526 | 5.560613 | -0.64242 | 0.521436 | 0.702321 | -6.41718 |
| AC009133.3  | -0.57174 | 2.863642 | -0.64218 | 0.521592 | 0.702378 | -5.63045 |
| AC087392.1  | 0.281736 | 6.782678 | 0.642068 | 0.521665 | 0.702378 | -6.57713 |
| AC004492.1  | -0.1861  | 8.002725 | -0.64176 | 0.521867 | 0.702524 | -6.91035 |
| AC125616.1  | -0.87499 | 2.389087 | -0.64046 | 0.522708 | 0.70353  | -5.53561 |
| AC010501.1  | 0.594441 | 3.644487 | 0.639392 | 0.523399 | 0.704335 | -5.59001 |
| AC048382.2  | -0.17917 | 6.719755 | -0.6392  | 0.523522 | 0.704374 | -6.68254 |
| AC128709.1  | 1.143327 | 3.648905 | 0.639032 | 0.523633 | 0.704396 | -5.51514 |
| AC010333.1  | 0.873478 | 2.756859 | 0.638019 | 0.524291 | 0.705034 | -5.46608 |
| AC087392.3  | 0.151442 | 5.986769 | 0.638014 | 0.524294 | 0.705034 | -6.36487 |
| AC112250.2  | -0.91832 | 1.697307 | -0.63775 | 0.524468 | 0.705141 | -5.49257 |
| AL021154.1  | 0.547517 | 5.690425 | 0.637553 | 0.524593 | 0.705183 | -6.08391 |
| AC002056.2  | -1.10518 | -0.23071 | -0.63715 | 0.524857 | 0.705206 | -5.35023 |
| AC024940.1  | 0.248889 | 5.361598 | 0.637093 | 0.524892 | 0.705206 | -6.14655 |
| AC027277.2  | -0.22545 | 7.109112 | -0.6372  | 0.524826 | 0.705206 | -6.76651 |
| AC100860.1  | 1.160406 | -0.60128 | 0.636219 | 0.52546  | 0.705465 | -5.26798 |
| LINC02413   | -0.87944 | 0.658161 | -0.63627 | 0.525427 | 0.705465 | -5.4012  |
| AC245140.2  | 0.128532 | 7.346906 | 0.636358 | 0.52537  | 0.705465 | -6.75143 |
| AL512274.1  | -0.34748 | 10.04101 | -0.63636 | 0.525366 | 0.705465 | -7.24882 |
| AL359198.1  | 0.828904 | 4.150808 | 0.636039 | 0.525577 | 0.705496 | -5.66579 |
| AC015853.2  | 1.167188 | -0.22897 | 0.634349 | 0.526677 | 0.705518 | -5.2822  |
| AC004012.1  | 1.191837 | 0.169181 | 0.634163 | 0.526798 | 0.705518 | -5.29156 |
| AC022733.2  | 1.202356 | 0.292432 | 0.635843 | 0.525705 | 0.705518 | -5.29523 |
| AC093010.2  | -0.78333 | -0.61051 | -0.63468 | 0.526465 | 0.705518 | -5.3253  |
| AP001619.2  | 0.738958 | 3.500988 | 0.634138 | 0.526815 | 0.705518 | -5.54615 |
| AL355472.2  | -0.85597 | 3.693092 | -0.63455 | 0.526544 | 0.705518 | -5.86523 |
| AC078909.2  | -0.51435 | 4.650247 | -0.63457 | 0.526533 | 0.705518 | -6.02234 |
| GAU1        | -0.49899 | 4.935195 | -0.63491 | 0.526312 | 0.705518 | -6.23391 |
| DENND6A-AS1 | -0.32445 | 5.510628 | -0.63479 | 0.52639  | 0.705518 | -6.41013 |
| AC107214.2  | -0.17856 | 5.884578 | -0.63571 | 0.525792 | 0.705518 | -6.45848 |
| AC253536.6  | -0.18856 | 6.554759 | -0.6348  | 0.526386 | 0.705518 | -6.62506 |
| AP001273.1  | 0.132401 | 6.882964 | 0.634568 | 0.526534 | 0.705518 | -6.65734 |
| AP001432.1  | 0.165833 | 7.303567 | 0.634907 | 0.526314 | 0.705518 | -6.74211 |
| AC006480.2  | -0.15506 | 7.022488 | -0.63396 | 0.526927 | 0.705544 | -6.73936 |
| AC008440.1  | -0.54221 | 5.073268 | -0.63353 | 0.527211 | 0.705797 | -6.24255 |
| LINC01786   | -0.24888 | 5.687051 | -0.63192 | 0.528261 | 0.707077 | -6.44525 |
| AC008663.3  | -1.05449 | -0.58537 | -0.63061 | 0.529111 | 0.707333 | -5.33391 |
| AL359881.2  | -0.944   | 1.052196 | -0.63082 | 0.528979 | 0.707333 | -5.44775 |
| ZFX-AS1     | 0.584145 | 4.916546 | 0.631415 | 0.528589 | 0.707333 | -5.8899  |
| AL512306.3  | -0.64732 | 4.213547 | -0.63078 | 0.529004 | 0.707333 | -5.94968 |
| AC008507.2  | -0.32718 | 4.426388 | -0.63106 | 0.528823 | 0.707333 | -6.03357 |
| AL662844.3  | 0.445068 | 5.892365 | 0.630614 | 0.529111 | 0.707333 | -6.16376 |
| DHRS4-AS1   | -0.12952 | 10.69485 | -0.63112 | 0.528784 | 0.707333 | -7.31301 |
| AC090001.1  | -0.9903  | -0.4048  | -0.63044 | 0.529226 | 0.707361 | -5.34211 |
| AC093117.1  | 0.930449 | -2.22779 | 0.629779 | 0.529656 | 0.707749 | -5.24041 |
| LINC02582   | 1.151073 | 2.857264 | 0.629705 | 0.529705 | 0.707749 | -5.44593 |
| AC096711.2  | 1.181229 | -1.36718 | 0.629331 | 0.529949 | 0.707949 | -5.25211 |
| AC012100.2  | -0.34928 | 5.394417 | -0.62916 | 0.530058 | 0.70797  | -6.36434 |

|             |          |          |          |          |          |          |
|-------------|----------|----------|----------|----------|----------|----------|
| LINC01030   | -1.01336 | -1.14015 | -0.62857 | 0.530445 | 0.70836  | -5.31472 |
| AL031728.1  | 0.15578  | 5.827092 | 0.627464 | 0.531169 | 0.7092   | -6.33982 |
| AL450311.1  | 1.172422 | -1.45167 | 0.626606 | 0.531729 | 0.709463 | -5.25186 |
| AL355297.2  | 1.316237 | -0.13626 | 0.626586 | 0.531743 | 0.709463 | -5.28262 |
| AC104779.1  | 1.077116 | 3.754256 | 0.626892 | 0.531542 | 0.709463 | -5.58415 |
| AC022364.1  | -0.22367 | 8.01128  | -0.62683 | 0.53158  | 0.709463 | -6.9204  |
| AC021054.1  | 0.186291 | 8.880488 | 0.626399 | 0.531865 | 0.709499 | -7.00408 |
| AL137026.1  | 0.985553 | -0.74795 | 0.62581  | 0.532251 | 0.709888 | -5.27375 |
| INE1        | 0.12013  | 8.597254 | 0.625508 | 0.532448 | 0.710025 | -6.97268 |
| CTBP1-DT    | 0.140118 | 9.200796 | 0.625122 | 0.532701 | 0.710236 | -7.06155 |
| LINC00621   | 1.016371 | 1.551977 | 0.623891 | 0.533507 | 0.711059 | -5.35927 |
| LINC00443   | -0.97412 | 1.375769 | -0.62392 | 0.533491 | 0.711059 | -5.49476 |
| AL136097.2  | -0.99462 | 0.881946 | -0.62317 | 0.533983 | 0.711566 | -5.43413 |
| KIAA0087    | -0.79861 | -1.27745 | -0.62302 | 0.53408  | 0.71157  | -5.30717 |
| AL035409.1  | 0.993181 | 3.053682 | 0.622346 | 0.53452  | 0.711988 | -5.46928 |
| AC016747.1  | 0.305972 | 8.14178  | 0.622249 | 0.534583 | 0.711988 | -6.86693 |
| AP001207.3  | 1.27592  | 5.236685 | 0.620518 | 0.535719 | 0.713375 | -5.77454 |
| AL365258.1  | -1.01127 | 1.124513 | -0.61968 | 0.536272 | 0.713985 | -5.44469 |
| AC084782.2  | -0.62975 | 3.015115 | -0.61834 | 0.537151 | 0.714521 | -5.71071 |
| AL118511.1  | 0.630981 | 4.34242  | 0.618388 | 0.537119 | 0.714521 | -5.73944 |
| AC117402.1  | 0.485752 | 5.88713  | 0.61839  | 0.537118 | 0.714521 | -6.24862 |
| AL732292.2  | 0.381995 | 6.103735 | 0.618532 | 0.537025 | 0.714521 | -6.34818 |
| AC093620.1  | 0.171384 | 7.14881  | 0.618591 | 0.536986 | 0.714521 | -6.71753 |
| AC084757.4  | 1.025413 | 1.189273 | 0.617695 | 0.537575 | 0.714579 | -5.33882 |
| LINC01562   | -0.22116 | 3.327917 | -0.61791 | 0.537435 | 0.714579 | -5.69798 |
| AC005014.2  | 0.296337 | 6.50424  | 0.617711 | 0.537564 | 0.714579 | -6.37837 |
| AL359921.1  | 0.217249 | 7.654073 | 0.617727 | 0.537554 | 0.714579 | -6.8151  |
| AC090617.1  | 1.080633 | 1.464491 | 0.616974 | 0.53805  | 0.715083 | -5.35765 |
| AC004672.1  | 0.502063 | 3.280803 | 0.616612 | 0.538287 | 0.715273 | -5.57385 |
| AC116348.1  | 0.608633 | 4.557436 | 0.614989 | 0.539356 | 0.716567 | -5.81104 |
| AC007494.3  | -0.32948 | 4.828572 | -0.61474 | 0.539523 | 0.716661 | -6.18664 |
| AL589986.2  | 1.225688 | 3.278984 | 0.613966 | 0.540031 | 0.717209 | -5.51541 |
| Z83847.1    | 0.492862 | 3.159044 | 0.613642 | 0.540244 | 0.717239 | -5.57381 |
| AC087276.1  | -0.22593 | 7.945417 | -0.61369 | 0.540215 | 0.717239 | -6.9259  |
| AC027348.1  | 0.906539 | 2.737266 | 0.6134   | 0.540404 | 0.717285 | -5.45574 |
| AL590006.1  | -0.19357 | 6.980842 | -0.6133  | 0.54047  | 0.717285 | -6.74019 |
| AC016866.1  | -0.17511 | 6.675356 | -0.61274 | 0.540843 | 0.717653 | -6.6691  |
| AC024267.5  | 0.563823 | 5.767424 | 0.61212  | 0.541248 | 0.718064 | -6.11906 |
| AP002439.1  | -1.02061 | -0.70813 | -0.61153 | 0.54164  | 0.718204 | -5.33997 |
| AL162734.1  | 0.761775 | 6.156231 | 0.611796 | 0.541463 | 0.718204 | -6.15126 |
| AC131971.1  | -0.16522 | 6.442101 | -0.61157 | 0.541611 | 0.718204 | -6.6191  |
| AC079766.1  | -0.48399 | 4.956218 | -0.61131 | 0.541785 | 0.718269 | -6.16417 |
| AC016027.2  | 0.230039 | 4.942925 | 0.60938  | 0.543058 | 0.71983  | -6.05568 |
| AC116312.1  | 1.229654 | 0.333055 | 0.608608 | 0.543569 | 0.720253 | -5.31138 |
| AC007001.1  | 1.073123 | 0.787134 | 0.608672 | 0.543527 | 0.720253 | -5.33157 |
| ZNF346-IT1  | -0.12537 | 6.943475 | -0.60842 | 0.543696 | 0.720295 | -6.72561 |
| AP000943.4  | -0.64779 | 3.863631 | -0.6074  | 0.544368 | 0.72094  | -6.03067 |
| N4BP2L2-IT2 | -0.12259 | 7.512927 | -0.60739 | 0.544376 | 0.72094  | -6.84194 |
| AC090739.1  | 0.180278 | 8.525621 | 0.607216 | 0.54449  | 0.720965 | -6.96013 |
| AC131212.1  | 1.049044 | -0.17079 | 0.606719 | 0.544819 | 0.721059 | -5.29844 |
| AC079906.1  | -0.79632 | 1.566927 | -0.60664 | 0.544869 | 0.721059 | -5.49375 |
| AC046130.2  | 0.711829 | 3.256831 | 0.606107 | 0.545225 | 0.721059 | -5.5355  |
| AC004925.1  | -0.49285 | 2.514607 | -0.6065  | 0.544967 | 0.721059 | -5.61847 |
| AC012568.1  | 0.654319 | 5.010429 | 0.606095 | 0.545233 | 0.721059 | -5.85966 |
| AC008083.2  | 0.514125 | 5.958197 | 0.606218 | 0.545152 | 0.721059 | -6.28923 |
| CACTIN-AS1  | 0.125632 | 6.020354 | 0.606247 | 0.545132 | 0.721059 | -6.45502 |
| AP001605.1  | -0.81895 | -2.40358 | -0.60562 | 0.545546 | 0.721346 | -5.28228 |
| AC007556.1  | 1.199844 | -0.63434 | 0.605244 | 0.545797 | 0.72155  | -5.28027 |

|            |          |          |          |          |          |          |
|------------|----------|----------|----------|----------|----------|----------|
| AP003419.3 | 0.241849 | 6.042912 | 0.604625 | 0.546207 | 0.721966 | -6.41889 |
| AL031651.1 | 0.581404 | 2.967279 | 0.604343 | 0.546394 | 0.722042 | -5.50252 |
| AL023583.1 | 0.604605 | 3.690197 | 0.604249 | 0.546457 | 0.722042 | -5.64869 |
| AC090627.1 | 0.785745 | 1.780728 | 0.604027 | 0.546604 | 0.722109 | -5.39695 |
| LINC01291  | 0.731793 | 7.102885 | 0.602949 | 0.547319 | 0.7228   | -6.518   |
| AC020913.3 | 0.168592 | 8.299287 | 0.602986 | 0.547295 | 0.7228   | -6.92716 |
| PPP4R1-AS1 | -0.42564 | 6.016499 | -0.60199 | 0.547954 | 0.723511 | -6.59393 |
| AC073439.1 | -0.15506 | 4.951024 | -0.60157 | 0.548236 | 0.723629 | -6.18318 |
| AL445231.1 | 0.17039  | 6.493973 | 0.601622 | 0.5482   | 0.723629 | -6.54857 |
| AP006287.2 | -0.58381 | 3.61148  | -0.60117 | 0.5485   | 0.72385  | -5.8069  |
| AL078601.2 | -1.03207 | -0.85758 | -0.6009  | 0.548677 | 0.723956 | -5.34196 |
| PINK1-AS   | -0.12331 | 8.506049 | -0.60074 | 0.548784 | 0.72397  | -7.00298 |
| Z99129.3   | -0.23228 | 3.492982 | -0.60019 | 0.549153 | 0.72433  | -5.74058 |
| AC009269.4 | 0.856563 | 2.804631 | 0.599773 | 0.549429 | 0.724567 | -5.4623  |
| AC005845.1 | 0.941965 | 1.06763  | 0.599145 | 0.549847 | 0.724991 | -5.35623 |
| AC069542.1 | 0.393221 | 4.981842 | 0.598947 | 0.549979 | 0.725038 | -6.05466 |
| AC091100.1 | -0.50893 | 2.175603 | -0.59878 | 0.550091 | 0.725059 | -5.53819 |
| AL583810.2 | 0.468608 | 3.619671 | 0.598566 | 0.550232 | 0.725118 | -5.63561 |
| ZFHx4-AS1  | 0.975241 | 0.555964 | 0.597305 | 0.551072 | 0.726096 | -5.32978 |
| AC010524.1 | -0.71317 | 3.266006 | -0.5966  | 0.551539 | 0.726585 | -5.72673 |
| AC093462.1 | 0.581339 | 2.495373 | 0.595499 | 0.552275 | 0.727427 | -5.47824 |
| AL031710.1 | -0.22422 | 5.87726  | -0.59512 | 0.552529 | 0.727634 | -6.49685 |
| AC003070.2 | 1.079543 | 0.564241 | 0.594833 | 0.552719 | 0.727635 | -5.32763 |
| BX539320.1 | 0.42263  | 6.328692 | 0.594826 | 0.552724 | 0.727635 | -6.28631 |
| AL354950.1 | 1.057151 | -0.18243 | 0.593969 | 0.553296 | 0.72826  | -5.30876 |
| AC004775.1 | 0.935364 | 0.413045 | 0.593154 | 0.55384  | 0.728722 | -5.32888 |
| AP000350.5 | 0.754551 | 3.729647 | 0.593233 | 0.553787 | 0.728722 | -5.64525 |
| BNC2-AS1   | 1.003461 | 3.037177 | 0.592518 | 0.554264 | 0.728885 | -5.48736 |
| LINC02158  | 0.514612 | 3.975526 | 0.592425 | 0.554326 | 0.728885 | -5.73191 |
| AL034346.1 | 0.322728 | 5.131077 | 0.59248  | 0.55429  | 0.728885 | -6.18726 |
| AC024933.1 | -0.28996 | 6.475535 | -0.59239 | 0.554352 | 0.728885 | -6.65648 |
| AL357054.3 | 0.777479 | 0.222768 | 0.591557 | 0.554907 | 0.729415 | -5.32806 |
| AL672291.1 | 0.966982 | 1.920704 | 0.59149  | 0.554952 | 0.729415 | -5.40497 |
| AL139349.1 | -0.16947 | 7.404807 | -0.59135 | 0.555047 | 0.729415 | -6.83201 |
| LINC02506  | 1.189623 | -0.24384 | 0.590387 | 0.555689 | 0.730131 | -5.30058 |
| AC090772.3 | 0.374262 | 6.525667 | 0.588299 | 0.557086 | 0.731839 | -6.49333 |
| AL445363.3 | 0.209205 | 4.65306  | 0.587838 | 0.557394 | 0.732116 | -5.99117 |
| AL672032.1 | 0.951452 | -0.95532 | 0.587517 | 0.55761  | 0.732271 | -5.28862 |
| AC113146.1 | 0.885235 | -0.51708 | 0.586866 | 0.558046 | 0.732583 | -5.30463 |
| AC015967.2 | -0.97278 | 1.256398 | -0.58673 | 0.55814  | 0.732583 | -5.48126 |
| AC006159.1 | -0.6491  | 4.445871 | -0.58687 | 0.558044 | 0.732583 | -6.10872 |
| AC006357.1 | 1.248984 | -0.86306 | 0.5861   | 0.55856  | 0.733006 | -5.28523 |
| AC073389.3 | 0.170731 | 6.743349 | 0.585478 | 0.558976 | 0.733425 | -6.6454  |
| AC015922.3 | 0.267221 | 9.666639 | 0.584997 | 0.559299 | 0.73372  | -7.13876 |
| AL356055.1 | 0.70675  | 4.13182  | 0.584257 | 0.559796 | 0.734203 | -5.77099 |
| AC009054.1 | -0.26562 | 5.6389   | -0.58416 | 0.559863 | 0.734203 | -6.40884 |
| AL133485.1 | -1.00086 | -0.83148 | -0.58295 | 0.560672 | 0.734781 | -5.34951 |
| AC005336.3 | -0.81283 | -0.35618 | -0.58292 | 0.560695 | 0.734781 | -5.36323 |
| AL158151.2 | 1.077894 | 1.700268 | 0.583161 | 0.560532 | 0.734781 | -5.37971 |
| AC007029.1 | -0.83519 | 1.967815 | -0.58298 | 0.560652 | 0.734781 | -5.54802 |
| LINC02245  | 0.541136 | 2.098637 | 0.582002 | 0.56131  | 0.735331 | -5.44126 |
| AC133065.3 | -0.20092 | 7.859002 | -0.58201 | 0.561304 | 0.735331 | -6.91545 |
| AC010333.2 | -0.47786 | 3.540939 | -0.58167 | 0.561531 | 0.735364 | -5.83021 |
| LINC01589  | -0.29912 | 7.177382 | -0.58175 | 0.561482 | 0.735364 | -6.82063 |
| AC012123.1 | -0.87932 | -1.48842 | -0.58115 | 0.56188  | 0.735692 | -5.32367 |
| AL158042.1 | 1.095395 | -1.12015 | 0.580762 | 0.562144 | 0.735755 | -5.28471 |
| LINC01970  | 0.26865  | 4.504174 | 0.580647 | 0.562221 | 0.735755 | -5.90923 |
| AC007382.1 | 0.124284 | 8.326596 | 0.580813 | 0.56211  | 0.735755 | -6.95351 |

|            |          |          |          |          |          |          |
|------------|----------|----------|----------|----------|----------|----------|
| AP002360.1 | -0.16569 | 9.475719 | -0.58036 | 0.562414 | 0.735879 | -7.16418 |
| LINC02012  | 0.305284 | 6.513144 | 0.579745 | 0.562828 | 0.736292 | -6.5359  |
| AC090617.9 | 0.633064 | 6.088882 | 0.57911  | 0.563256 | 0.736583 | -6.36282 |
| NOP53-AS1  | -0.16576 | 6.552323 | -0.57898 | 0.563344 | 0.736583 | -6.66974 |
| AC127024.6 | 0.13295  | 7.420903 | 0.579242 | 0.563167 | 0.736583 | -6.79232 |
| AL158166.2 | 0.49554  | 5.923594 | 0.578568 | 0.563621 | 0.736816 | -6.26745 |
| AL583808.1 | 1.497972 | 2.740503 | 0.577292 | 0.56448  | 0.737591 | -5.41885 |
| AC004160.2 | -0.9069  | 0.636377 | -0.5771  | 0.564606 | 0.737591 | -5.42326 |
| AC020611.2 | 0.684105 | 3.574698 | 0.577536 | 0.564316 | 0.737591 | -5.63216 |
| EHD4-AS1   | -0.3929  | 4.69553  | -0.57722 | 0.564529 | 0.737591 | -6.11814 |
| AC010273.1 | -0.19518 | 5.652793 | -0.57691 | 0.564738 | 0.737636 | -6.40389 |
| AL391987.4 | -0.93025 | 0.527318 | -0.57671 | 0.564869 | 0.737679 | -5.41881 |
| AC103982.1 | 1.008946 | -1.50991 | 0.576203 | 0.565214 | 0.737891 | -5.27809 |
| AL356475.1 | 1.082351 | 0.202401 | 0.576182 | 0.565229 | 0.737891 | -5.32428 |
| AC093426.1 | -0.81219 | -1.82729 | -0.57554 | 0.565661 | 0.738118 | -5.31152 |
| LINC02507  | 0.89739  | 0.491284 | 0.575487 | 0.565698 | 0.738118 | -5.34226 |
| AP003396.3 | -0.86643 | -0.27089 | -0.57559 | 0.565626 | 0.738118 | -5.37542 |
| AC068790.2 | -0.13558 | 7.062605 | -0.57527 | 0.565844 | 0.738181 | -6.77237 |
| AC131902.2 | 0.921535 | -1.1947  | 0.574939 | 0.566067 | 0.738216 | -5.28915 |
| AC245014.3 | 0.286224 | 5.860284 | 0.574966 | 0.566049 | 0.738216 | -6.37862 |
| LINC01450  | 0.829509 | -1.87069 | 0.574686 | 0.566238 | 0.73831  | -5.27412 |
| AL136320.1 | -0.97401 | -0.44743 | -0.57408 | 0.566646 | 0.73833  | -5.3667  |
| AC100835.1 | -0.91303 | 0.215893 | -0.57421 | 0.566561 | 0.73833  | -5.40548 |
| AC093525.6 | 0.648352 | 2.912598 | 0.574356 | 0.566461 | 0.73833  | -5.51869 |
| AL355916.2 | -0.2565  | 5.992914 | -0.57449 | 0.566367 | 0.73833  | -6.58238 |
| LINC02062  | 0.228693 | 6.062771 | 0.573414 | 0.567097 | 0.738789 | -6.30333 |
| AC068620.2 | 0.214171 | 6.691823 | 0.572903 | 0.567442 | 0.738983 | -6.63278 |
| AP003392.3 | 0.178439 | 7.191005 | 0.573023 | 0.567361 | 0.738983 | -6.74087 |
| AC156455.1 | 0.304755 | 5.986562 | 0.57262  | 0.567633 | 0.739103 | -6.41993 |
| AP005205.3 | -0.96537 | -0.60977 | -0.57185 | 0.568152 | 0.739288 | -5.36145 |
| TRIM31-AS1 | 0.887689 | 6.689874 | 0.572229 | 0.567897 | 0.739288 | -6.29331 |
| ITGA6-AS1  | -0.17261 | 6.591864 | -0.57183 | 0.568168 | 0.739288 | -6.67218 |
| SPAG5-AS1  | 0.106306 | 7.453783 | 0.572108 | 0.567979 | 0.739288 | -6.79824 |
| AL121983.1 | 0.904326 | 2.293361 | 0.571514 | 0.568381 | 0.739436 | -5.44178 |
| AC016597.2 | -0.9348  | 0.238577 | -0.57108 | 0.568673 | 0.739688 | -5.40066 |
| DLGAP1-AS3 | 0.918946 | -1.1267  | 0.570451 | 0.5691   | 0.740115 | -5.29188 |
| AC005034.4 | -0.54186 | 3.471995 | -0.56985 | 0.569508 | 0.740286 | -5.82454 |
| AC084859.1 | 0.477446 | 7.02235  | 0.569826 | 0.569523 | 0.740286 | -6.58936 |
| AC010531.6 | -0.16397 | 7.039813 | -0.56982 | 0.569526 | 0.740286 | -6.77279 |
| Z92544.1   | 0.744545 | 1.972855 | 0.568286 | 0.570565 | 0.741252 | -5.43149 |
| NARF-AS1   | -0.17666 | 5.765857 | -0.56837 | 0.570507 | 0.741252 | -6.45296 |
| AL021707.1 | -0.13293 | 6.284916 | -0.56833 | 0.570538 | 0.741252 | -6.59997 |
| AC044839.1 | 0.832704 | 3.445796 | 0.567681 | 0.570976 | 0.741563 | -5.56337 |
| AC004494.1 | -0.17116 | 5.165386 | -0.56764 | 0.571003 | 0.741563 | -6.23561 |
| AC134043.2 | 0.199376 | 5.313744 | 0.567123 | 0.571354 | 0.741891 | -6.20226 |
| AL033384.2 | 0.16302  | 7.637191 | 0.566784 | 0.571583 | 0.74206  | -6.84429 |
| AL359399.1 | 1.006039 | 1.134077 | 0.566535 | 0.571752 | 0.74212  | -5.36267 |
| C8orf17    | -0.434   | 2.31373  | -0.56643 | 0.571826 | 0.74212  | -5.58587 |
| AC092598.1 | 0.973824 | -1.16759 | 0.565687 | 0.572327 | 0.742528 | -5.29135 |
| ERVH-1     | 0.950352 | 0.868805 | 0.565638 | 0.57236  | 0.742528 | -5.35957 |
| AL355490.1 | 0.264456 | 5.610859 | 0.565524 | 0.572438 | 0.742528 | -6.24578 |
| LINC00315  | 0.467949 | 2.407035 | 0.565373 | 0.57254  | 0.742533 | -5.49038 |
| AC116158.1 | 0.18542  | 5.136398 | 0.564665 | 0.573021 | 0.743028 | -6.14495 |
| AL645929.2 | -0.56404 | 2.844707 | -0.56365 | 0.573711 | 0.743701 | -5.67359 |
| AC098820.3 | -0.559   | 3.065165 | -0.56361 | 0.573738 | 0.743701 | -5.71555 |
| AP001107.8 | 0.596457 | 4.169912 | 0.563189 | 0.574023 | 0.743815 | -5.7684  |
| AC008115.3 | 0.135781 | 8.099472 | 0.563299 | 0.573948 | 0.743815 | -6.92459 |
| AC011005.4 | 0.931605 | 4.470431 | 0.562828 | 0.574268 | 0.744004 | -5.74188 |

|             |          |          |          |          |          |          |
|-------------|----------|----------|----------|----------|----------|----------|
| AL162414.1  | 0.981528 | -1.74177 | 0.561721 | 0.575021 | 0.744851 | -5.27974 |
| AC246787.2  | 1.088858 | -0.71521 | 0.561185 | 0.575385 | 0.744881 | -5.30423 |
| AL109811.1  | 0.131674 | 5.272013 | 0.561129 | 0.575424 | 0.744881 | -6.18742 |
| AL355102.1  | -0.36606 | 5.325139 | -0.56143 | 0.57522  | 0.744881 | -6.44194 |
| AC093909.6  | -0.19384 | 8.903573 | -0.5611  | 0.575441 | 0.744881 | -7.09309 |
| AC069294.1  | -0.95699 | -1.33973 | -0.56088 | 0.575592 | 0.744948 | -5.34503 |
| WARS2-IT1   | -0.2008  | 4.430281 | -0.56007 | 0.576142 | 0.745532 | -6.03546 |
| C1QTNF1-AS1 | -0.48725 | 4.197645 | -0.55902 | 0.576859 | 0.746331 | -6.04986 |
| AC009152.1  | -0.56771 | 3.647453 | -0.55821 | 0.577408 | 0.746913 | -5.93213 |
| AC120349.3  | 0.381315 | 5.107771 | 0.558017 | 0.577542 | 0.746957 | -6.02024 |
| AC015813.5  | 0.124701 | 7.485187 | 0.557683 | 0.57777  | 0.746994 | -6.81972 |
| AL731566.1  | -0.10725 | 7.76201  | -0.55781 | 0.577681 | 0.746994 | -6.90636 |
| AC017006.1  | 1.003534 | 1.182951 | 0.557409 | 0.577956 | 0.747107 | -5.38161 |
| C9orf170    | 0.765371 | -0.36666 | 0.557201 | 0.578098 | 0.747162 | -5.32758 |
| AC104248.1  | 0.823927 | 2.046218 | 0.557036 | 0.578211 | 0.747179 | -5.42885 |
| AP000721.2  | -0.6322  | 2.023854 | -0.55681 | 0.578367 | 0.747252 | -5.55606 |
| AC019130.1  | 0.992607 | -0.06023 | 0.556415 | 0.578634 | 0.747258 | -5.32938 |
| AL133481.1  | -0.92522 | -1.61781 | -0.55652 | 0.578565 | 0.747258 | -5.33536 |
| AL122058.1  | -0.68794 | 3.405196 | -0.55622 | 0.578769 | 0.747258 | -5.81314 |
| AL049870.3  | -0.28212 | 6.362982 | -0.55624 | 0.578753 | 0.747258 | -6.68109 |
| DPYD-IT1    | 0.965313 | 0.818354 | 0.556021 | 0.578903 | 0.747302 | -5.36184 |
| AC025580.3  | -0.51429 | 2.392181 | -0.55552 | 0.579244 | 0.747305 | -5.60642 |
| AL450226.2  | -0.50102 | 3.906738 | -0.5558  | 0.579053 | 0.747305 | -5.89038 |
| AC068620.1  | 0.157776 | 6.5252   | 0.555492 | 0.579264 | 0.747305 | -6.59361 |
| AC025265.1  | 0.209339 | 6.59334  | 0.555434 | 0.579303 | 0.747305 | -6.60317 |
| AC022098.4  | 0.816203 | 3.071811 | 0.55406  | 0.580241 | 0.748387 | -5.5419  |
| AC114550.1  | 0.934051 | -1.4863  | 0.553607 | 0.58055  | 0.74856  | -5.28992 |
| AP000911.2  | 0.809265 | 0.8741   | 0.553571 | 0.580575 | 0.74856  | -5.37042 |
| GIHCG       | 0.231337 | 7.810175 | 0.55325  | 0.580795 | 0.748617 | -6.86353 |
| AL031714.1  | 0.089256 | 8.015598 | 0.553215 | 0.580818 | 0.748617 | -6.92782 |
| AC126564.1  | 0.793676 | 0.657973 | 0.552322 | 0.581429 | 0.749275 | -5.36184 |
| AL445183.2  | 0.815518 | 0.766525 | 0.551868 | 0.581739 | 0.749546 | -5.36848 |
| AC087241.3  | 0.851269 | 0.030482 | 0.551511 | 0.581983 | 0.749733 | -5.33624 |
| AL390760.1  | 1.007171 | 0.132301 | 0.551222 | 0.582181 | 0.749855 | -5.33543 |
| AC005828.4  | -0.26706 | 5.408394 | -0.55108 | 0.582278 | 0.749855 | -6.4059  |
| AC104794.2  | 0.160275 | 8.757067 | 0.55075  | 0.582504 | 0.750017 | -7.03306 |
| AIRN        | -0.23596 | 2.424096 | -0.54958 | 0.583307 | 0.750923 | -5.57285 |
| MACC1-AS1   | 0.952054 | 2.286607 | 0.549264 | 0.583521 | 0.750941 | -5.45593 |
| AC012613.2  | -0.52383 | 1.472554 | -0.54939 | 0.583432 | 0.750941 | -5.49881 |
| MAPT-IT1    | -0.72208 | -2.15576 | -0.54837 | 0.584132 | 0.751273 | -5.31315 |
| AC007786.2  | 0.94976  | -0.30593 | 0.548179 | 0.584264 | 0.751273 | -5.32535 |
| AC007786.1  | -0.51463 | 3.307042 | -0.54865 | 0.583942 | 0.751273 | -5.75308 |
| AL360181.1  | 1.102852 | 4.968453 | 0.548157 | 0.584279 | 0.751273 | -5.81422 |
| AC098613.1  | 0.503772 | 6.842803 | 0.548324 | 0.584164 | 0.751273 | -6.57525 |
| Z93241.1    | 0.290574 | 4.735442 | 0.547259 | 0.584894 | 0.751834 | -5.98247 |
| AL627171.1  | -0.1198  | 6.623432 | -0.54723 | 0.584916 | 0.751834 | -6.69115 |
| AL390318.1  | 0.9105   | -2.04744 | 0.546606 | 0.585342 | 0.752216 | -5.28291 |
| AL139246.1  | 0.949238 | 3.713264 | 0.546502 | 0.585413 | 0.752216 | -5.63989 |
| ZKSCAN2-DT  | 0.111161 | 7.057568 | 0.546328 | 0.585532 | 0.752241 | -6.74624 |
| AL512306.2  | -0.28719 | 5.677411 | -0.54556 | 0.586058 | 0.752788 | -6.48727 |
| AC110285.2  | -0.27913 | 6.871101 | -0.54519 | 0.58631  | 0.752982 | -6.76914 |
| AC108451.2  | 0.987588 | 4.833703 | 0.544302 | 0.586923 | 0.753512 | -5.74073 |
| AC099689.1  | -0.19525 | 5.495791 | -0.54433 | 0.586907 | 0.753512 | -6.40824 |
| AC092171.1  | -0.11915 | 6.371676 | -0.54388 | 0.587211 | 0.753624 | -6.63542 |
| AC018521.5  | -0.09969 | 7.209684 | -0.54401 | 0.587127 | 0.753624 | -6.81536 |
| IER3-AS1    | 0.190911 | 6.871288 | 0.543383 | 0.587554 | 0.753936 | -6.68593 |
| SEMA5A-AS1  | -0.82274 | -1.96134 | -0.54323 | 0.587656 | 0.753938 | -5.32795 |
| AC007370.1  | 1.009972 | -0.96226 | 0.542982 | 0.587829 | 0.754014 | -5.3064  |

|            |          |          |          |          |          |          |
|------------|----------|----------|----------|----------|----------|----------|
| WWTR1-IT1  | -0.289   | 6.160116 | -0.54286 | 0.587916 | 0.754014 | -6.62059 |
| AL359878.2 | -0.57909 | 4.429278 | -0.54256 | 0.588119 | 0.754145 | -6.01738 |
| AC023794.5 | 0.720266 | 2.473116 | 0.542366 | 0.588253 | 0.754188 | -5.49512 |
| AL359881.3 | 0.850121 | -1.10978 | 0.542094 | 0.58844  | 0.754199 | -5.30722 |
| AC092295.2 | -0.16746 | 7.170284 | -0.54206 | 0.588462 | 0.754199 | -6.82706 |
| AC132068.1 | 0.609368 | 3.874526 | 0.541712 | 0.588702 | 0.754378 | -5.75279 |
| AP000808.2 | 0.31986  | 6.747758 | 0.541193 | 0.589059 | 0.754707 | -6.62559 |
| AP001266.2 | -0.25859 | 6.405437 | -0.54072 | 0.589384 | 0.754995 | -6.69346 |
| AC099796.1 | 1.083386 | -0.01784 | 0.540545 | 0.589505 | 0.75502  | -5.33583 |
| AC127496.7 | -0.14495 | 7.516559 | -0.53993 | 0.589926 | 0.755431 | -6.88574 |
| AC087241.4 | 0.726078 | 3.87269  | 0.539644 | 0.590125 | 0.755557 | -5.66259 |
| AL121929.2 | -0.19003 | 6.618455 | -0.53883 | 0.590688 | 0.756149 | -6.7127  |
| AL451069.1 | -0.90959 | -1.41782 | -0.53855 | 0.590875 | 0.756167 | -5.35002 |
| AL008726.1 | 0.146956 | 7.229033 | 0.538514 | 0.590903 | 0.756167 | -6.78561 |
| AP003027.1 | -0.7563  | -2.77923 | -0.53804 | 0.591228 | 0.756186 | -5.30057 |
| AL133351.1 | 0.957884 | 0.590504 | 0.538092 | 0.591194 | 0.756186 | -5.36063 |
| AC124319.5 | -0.14234 | 5.053035 | -0.53799 | 0.591261 | 0.756186 | -6.20982 |
| AP006623.1 | -0.20412 | 5.589241 | -0.53791 | 0.591321 | 0.756186 | -6.4339  |
| AC009312.1 | -0.92421 | -1.03109 | -0.53721 | 0.591801 | 0.756507 | -5.3615  |
| LINC02649  | -0.16445 | 5.178918 | -0.53672 | 0.592141 | 0.756507 | -6.28393 |
| AL031005.1 | -0.31168 | 5.108555 | -0.53667 | 0.592176 | 0.756507 | -6.29369 |
| GAS6-AS1   | 0.24138  | 6.660167 | 0.536925 | 0.591998 | 0.756507 | -6.64356 |
| AC141002.1 | -0.29016 | 6.610236 | -0.53705 | 0.591913 | 0.756507 | -6.74123 |
| AC091185.1 | 0.150727 | 7.374147 | 0.536848 | 0.592051 | 0.756507 | -6.81242 |
| AC137770.1 | -0.69718 | 2.157959 | -0.53644 | 0.59233  | 0.756575 | -5.58878 |
| AC098484.2 | -0.27259 | 5.63163  | -0.53527 | 0.593141 | 0.757353 | -6.48591 |
| TAF1A-AS1  | 0.155799 | 7.448115 | 0.535406 | 0.593045 | 0.757353 | -6.8088  |
| AL355432.1 | 0.923343 | -0.53072 | 0.534296 | 0.593811 | 0.757822 | -5.3276  |
| LINC00028  | 0.920433 | -0.28219 | 0.534004 | 0.594012 | 0.757822 | -5.33279 |
| AC109809.1 | 0.893292 | 1.091204 | 0.534142 | 0.593918 | 0.757822 | -5.38467 |
| AC096541.1 | -0.62639 | 1.288429 | -0.53454 | 0.593645 | 0.757822 | -5.48888 |
| AC007620.3 | 0.379476 | 5.603784 | 0.534116 | 0.593936 | 0.757822 | -6.17004 |
| AC010894.5 | 0.905862 | -0.64561 | 0.533003 | 0.594704 | 0.758535 | -5.32302 |
| AC021549.1 | 0.859591 | 3.218127 | 0.532903 | 0.594773 | 0.758535 | -5.59475 |
| LINC00622  | 0.295023 | 6.112657 | 0.532223 | 0.595243 | 0.759005 | -6.4189  |
| BX324167.2 | -0.32051 | 3.004467 | -0.53169 | 0.595609 | 0.759343 | -5.69628 |
| AC012379.1 | 0.953593 | -1.49842 | 0.53144  | 0.595784 | 0.759438 | -5.30035 |
| AP002892.2 | 0.918792 | -0.41457 | 0.531192 | 0.595956 | 0.759528 | -5.33035 |
| SIDT1-AS1  | 0.899495 | 2.474554 | 0.530425 | 0.596486 | 0.75963  | -5.47415 |
| LEMD1-AS1  | 0.543002 | 3.33074  | 0.530278 | 0.596588 | 0.75963  | -5.60007 |
| U91328.3   | -0.35129 | 4.615243 | -0.53067 | 0.596318 | 0.75963  | -6.20696 |
| AC004112.1 | -0.19323 | 5.623705 | -0.53068 | 0.596307 | 0.75963  | -6.43999 |
| AC004771.3 | 0.152295 | 7.51186  | 0.530199 | 0.596643 | 0.75963  | -6.8428  |
| AC022146.2 | -0.37672 | 7.432497 | -0.53055 | 0.596397 | 0.75963  | -6.90861 |
| AL359510.2 | -0.15662 | 5.111558 | -0.52965 | 0.597024 | 0.759986 | -6.27693 |
| LINC02470  | 0.941456 | -1.2195  | 0.528307 | 0.597952 | 0.760541 | -5.30868 |
| HAR1A      | -0.36069 | 3.988501 | -0.52855 | 0.597782 | 0.760541 | -6.00681 |
| AP000919.4 | -0.23539 | 6.180671 | -0.52816 | 0.598057 | 0.760541 | -6.61193 |
| AC068338.2 | 0.151136 | 7.307482 | 0.528141 | 0.598067 | 0.760541 | -6.79313 |
| AC004832.5 | -0.12679 | 7.490381 | -0.52876 | 0.597635 | 0.760541 | -6.878   |
| AL354733.3 | -0.11992 | 9.458605 | -0.5284  | 0.59789  | 0.760541 | -7.19072 |
| AL353807.2 | 0.65326  | 5.013893 | 0.527495 | 0.598515 | 0.760853 | -6.00472 |
| LINC01836  | -0.3119  | 6.49247  | -0.5276  | 0.598438 | 0.760853 | -6.6848  |
| AL138781.2 | 0.480029 | 2.870967 | 0.527222 | 0.598703 | 0.760932 | -5.58264 |
| AC034229.4 | -0.29422 | 6.018628 | -0.52711 | 0.59878  | 0.760932 | -6.59288 |
| USP30-AS1  | 0.254595 | 7.73811  | 0.526701 | 0.599065 | 0.761166 | -6.83715 |
| AC097504.2 | 0.999528 | 0.184835 | 0.526332 | 0.59932  | 0.761208 | -5.35023 |
| AL358075.2 | -0.62145 | 4.011005 | -0.52621 | 0.599402 | 0.761208 | -5.94042 |

|             |          |          |          |          |          |          |
|-------------|----------|----------|----------|----------|----------|----------|
| AC025259.3  | 0.264619 | 6.531303 | 0.526333 | 0.599319 | 0.761208 | -6.64357 |
| AC020908.1  | 0.983916 | -1.0524  | 0.525591 | 0.599834 | 0.761628 | -5.31332 |
| AL135999.1  | 0.092886 | 7.929977 | 0.524712 | 0.600444 | 0.762273 | -6.92709 |
| MAST4-IT1   | 0.91321  | -1.84421 | 0.524008 | 0.600932 | 0.762335 | -5.29491 |
| AP000350.7  | -0.17249 | 3.63012  | -0.52391 | 0.601    | 0.762335 | -5.78869 |
| AL096701.3  | 0.103371 | 6.293395 | 0.523915 | 0.600997 | 0.762335 | -6.55421 |
| AC005586.1  | -0.18293 | 8.237885 | -0.52402 | 0.600922 | 0.762335 | -7.01209 |
| AC126474.2  | -0.08228 | 9.951037 | -0.52418 | 0.600815 | 0.762335 | -7.2584  |
| AC022167.3  | 0.471647 | 4.620433 | 0.523588 | 0.601224 | 0.762491 | -5.91119 |
| AC000123.2  | 0.120706 | 8.44552  | 0.523404 | 0.601352 | 0.762524 | -7.00626 |
| AC005096.1  | -0.24406 | 5.892105 | -0.52314 | 0.601537 | 0.76263  | -6.5237  |
| AL596330.1  | -0.86762 | -0.43714 | -0.5229  | 0.601703 | 0.762712 | -5.38999 |
| AC244090.3  | 0.467123 | 4.008232 | 0.522231 | 0.602167 | 0.763171 | -5.85467 |
| AC090971.2  | -0.13426 | 6.605011 | -0.52088 | 0.603105 | 0.764232 | -6.70694 |
| AC005342.1  | -0.83911 | -2.0109  | -0.51964 | 0.603968 | 0.765195 | -5.33316 |
| AC136624.1  | -0.84134 | -0.98109 | -0.51874 | 0.604591 | 0.765856 | -5.3677  |
| AC134682.1  | 0.355756 | 3.307031 | 0.518358 | 0.60486  | 0.766067 | -5.66566 |
| AL731537.1  | 0.963301 | -1.26723 | 0.517954 | 0.605141 | 0.766294 | -5.31044 |
| AP003555.3  | 0.641817 | 7.665654 | 0.517299 | 0.605597 | 0.766743 | -6.69522 |
| AC025678.3  | 0.256044 | 3.572056 | 0.51712  | 0.605722 | 0.766771 | -5.72062 |
| CEBPA-DT    | -0.21204 | 8.013175 | -0.51689 | 0.605884 | 0.766848 | -6.98036 |
| LINC02664   | 0.575811 | 1.934313 | 0.515993 | 0.606507 | 0.767507 | -5.45993 |
| WWC3-AS1    | 0.84033  | 1.160295 | 0.51545  | 0.606886 | 0.767857 | -5.39796 |
| ZNF252P-AS1 | -0.14502 | 5.443388 | -0.51522 | 0.607048 | 0.767933 | -6.35705 |
| STARD4-AS1  | -0.14241 | 6.466406 | -0.51429 | 0.607692 | 0.768618 | -6.65796 |
| AP000915.1  | 0.929987 | -1.07756 | 0.513979 | 0.607912 | 0.768637 | -5.31773 |
| AC027682.5  | 0.498565 | 4.500083 | 0.514117 | 0.607816 | 0.768637 | -5.88487 |
| AC098476.1  | 0.916854 | 3.560435 | 0.512441 | 0.608985 | 0.769865 | -5.57718 |
| AC244100.2  | 0.759138 | -0.67552 | 0.510299 | 0.610481 | 0.771541 | -5.33577 |
| AC005037.1  | 0.209399 | 5.610891 | 0.510249 | 0.610517 | 0.771541 | -6.28633 |
| AC008443.3  | 1.024273 | 3.219384 | 0.510032 | 0.610668 | 0.771603 | -5.55755 |
| CCAT2       | 0.469161 | 2.812272 | 0.509207 | 0.611245 | 0.772202 | -5.55681 |
| P4HA2-AS1   | -0.72352 | 0.784371 | -0.50815 | 0.611983 | 0.773004 | -5.45195 |
| AL161669.3  | 0.681332 | 5.508637 | 0.507901 | 0.612159 | 0.773096 | -6.03733 |
| AL078604.2  | 0.258719 | 4.647337 | 0.507595 | 0.612373 | 0.773237 | -5.96322 |
| AL357078.3  | 0.49472  | 4.639801 | 0.507245 | 0.612618 | 0.773286 | -5.88519 |
| GTSE1-DT    | 0.158629 | 6.005696 | 0.507358 | 0.612539 | 0.773286 | -6.45881 |
| AL159972.1  | 0.894747 | 1.16225  | 0.507    | 0.612789 | 0.773372 | -5.39617 |
| AC055811.1  | 0.16215  | 5.967488 | 0.506296 | 0.613282 | 0.773735 | -6.46818 |
| AL160006.1  | -0.11269 | 8.789475 | -0.50639 | 0.613218 | 0.773735 | -7.09889 |
| AL161785.1  | -0.22682 | 6.141273 | -0.50556 | 0.613797 | 0.774254 | -6.62029 |
| LINC02243   | -0.63394 | 1.519297 | -0.50497 | 0.614214 | 0.774397 | -5.53877 |
| AC026150.3  | -0.6742  | 1.784649 | -0.50496 | 0.614219 | 0.774397 | -5.57089 |
| AC092117.2  | -0.24391 | 4.523555 | -0.50519 | 0.614061 | 0.774397 | -6.08953 |
| AC104996.1  | 0.86924  | -1.35934 | 0.503681 | 0.615116 | 0.774487 | -5.31598 |
| AL589666.2  | -0.7599  | 0.288727 | -0.50373 | 0.61508  | 0.774487 | -5.43057 |
| LINC02636   | -0.83107 | 0.414626 | -0.5047  | 0.614401 | 0.774487 | -5.43859 |
| LINC01659   | -0.75842 | 1.510306 | -0.50402 | 0.614875 | 0.774487 | -5.51894 |
| AC011471.2  | -0.69107 | 1.768895 | -0.50417 | 0.614775 | 0.774487 | -5.5657  |
| AC010643.1  | 0.450445 | 4.211446 | 0.50424  | 0.614723 | 0.774487 | -5.80145 |
| AC011498.6  | 0.136339 | 6.527946 | 0.504532 | 0.614519 | 0.774487 | -6.64065 |
| AC079414.3  | -0.13994 | 7.325218 | -0.50376 | 0.61506  | 0.774487 | -6.86114 |
| AC013437.1  | 0.929743 | -0.24109 | 0.501919 | 0.616352 | 0.775252 | -5.3488  |
| AC004808.2  | 0.996938 | 0.159241 | 0.500898 | 0.617069 | 0.775252 | -5.36064 |
| AC131280.1  | -0.67553 | -1.04321 | -0.5015  | 0.616645 | 0.775252 | -5.36736 |
| AC005304.2  | -0.70979 | -0.98118 | -0.5015  | 0.616648 | 0.775252 | -5.37321 |
| AC020928.3  | -0.55067 | 1.334541 | -0.50245 | 0.615978 | 0.775252 | -5.49463 |
| AC069234.1  | 0.654676 | 2.766624 | 0.501208 | 0.616851 | 0.775252 | -5.56287 |

|            |          |          |          |          |          |          |
|------------|----------|----------|----------|----------|----------|----------|
| AC036108.2 | 0.450416 | 2.785271 | 0.500583 | 0.61729  | 0.775252 | -5.5634  |
| AC092162.3 | -0.49684 | 2.511178 | -0.5003  | 0.617492 | 0.775252 | -5.64293 |
| TTLL10-AS1 | -0.22281 | 3.586581 | -0.50263 | 0.615853 | 0.775252 | -5.81402 |
| AC002306.1 | 0.445079 | 4.639052 | 0.501645 | 0.616544 | 0.775252 | -5.85798 |
| AC091132.4 | 0.239813 | 4.122474 | 0.500924 | 0.617051 | 0.775252 | -5.90709 |
| AC027682.6 | -0.25972 | 4.904526 | -0.50033 | 0.61747  | 0.775252 | -6.11417 |
| AC110769.3 | 0.140304 | 5.571373 | 0.50062  | 0.617264 | 0.775252 | -6.34541 |
| AC012676.4 | -0.18024 | 5.479979 | -0.50043 | 0.617394 | 0.775252 | -6.37035 |
| MNX1-AS1   | 0.675088 | 6.708863 | 0.50017  | 0.61758  | 0.775252 | -6.43326 |
| AC104785.1 | 0.160563 | 6.054245 | 0.501939 | 0.616338 | 0.775252 | -6.50489 |
| AC004233.3 | -0.34813 | 7.126524 | -0.50087 | 0.61709  | 0.775252 | -6.85042 |
| ZNF32-AS2  | -0.12101 | 7.627969 | -0.50236 | 0.616043 | 0.775252 | -6.91955 |
| AC100821.2 | -0.18962 | 6.124174 | -0.49975 | 0.617876 | 0.775493 | -6.60259 |
| AC090877.2 | 0.393315 | 4.796967 | 0.499545 | 0.618019 | 0.775544 | -6.12877 |
| AC008543.5 | -0.53517 | 0.537636 | -0.49921 | 0.618252 | 0.775705 | -5.43674 |
| AC015909.3 | 0.759308 | -0.99285 | 0.498737 | 0.618588 | 0.775743 | -5.33084 |
| AL359979.1 | 1.030545 | -0.28981 | 0.498732 | 0.618591 | 0.775743 | -5.34709 |
| AC090607.1 | 0.39144  | 4.875327 | 0.498996 | 0.618406 | 0.775743 | -6.0618  |
| AC067817.1 | 0.830565 | 2.210802 | 0.498184 | 0.618977 | 0.77608  | -5.46981 |
| AL445423.1 | -0.7673  | 1.066275 | -0.49793 | 0.619157 | 0.77608  | -5.47889 |
| AL158801.2 | 0.209794 | 5.568319 | 0.497909 | 0.61917  | 0.77608  | -6.32302 |
| RFPL1S     | 0.283653 | 2.688166 | 0.497411 | 0.61952  | 0.77639  | -5.56904 |
| AC009831.4 | 0.679351 | -1.332   | 0.496472 | 0.620181 | 0.776978 | -5.32247 |
| AC022107.1 | -0.12866 | 7.113805 | -0.49645 | 0.620197 | 0.776978 | -6.81456 |
| LINC02066  | 0.923082 | -1.57396 | 0.495875 | 0.620601 | 0.777096 | -5.31306 |
| AC009090.2 | 0.866122 | -1.42021 | 0.495968 | 0.620536 | 0.777096 | -5.31731 |
| AC107079.1 | 0.818105 | -0.83223 | 0.495967 | 0.620537 | 0.777096 | -5.33713 |
| GPC6-AS1   | -0.80026 | -0.14621 | -0.49449 | 0.62158  | 0.778192 | -5.40964 |
| AC008957.3 | 0.39847  | 4.418076 | 0.494095 | 0.621855 | 0.778407 | -5.95522 |
| AC004771.2 | -0.2551  | 5.017142 | -0.49301 | 0.622623 | 0.778978 | -6.27417 |
| AC005224.3 | -0.17794 | 5.64833  | -0.49328 | 0.622432 | 0.778978 | -6.49652 |
| AC023632.5 | -0.1185  | 6.833562 | -0.4931  | 0.622556 | 0.778978 | -6.76267 |
| AC021087.3 | 0.134508 | 5.323092 | 0.49275  | 0.622803 | 0.779074 | -6.29344 |
| AC093904.4 | -0.3237  | 5.607085 | -0.49229 | 0.623125 | 0.779347 | -6.49974 |
| AC027514.1 | 0.248    | 4.023763 | 0.491978 | 0.623348 | 0.779497 | -5.86275 |
| AP006216.1 | 0.886324 | -1.2399  | 0.491543 | 0.623655 | 0.77975  | -5.32438 |
| RASSF1-AS1 | -0.13668 | 5.765551 | -0.49112 | 0.623955 | 0.779906 | -6.45745 |
| AC138470.1 | -0.13426 | 6.779731 | -0.49107 | 0.623987 | 0.779906 | -6.76396 |
| AP001527.1 | 0.707012 | -0.70244 | 0.490622 | 0.624305 | 0.780027 | -5.34398 |
| LINC01154  | -0.82006 | -1.47719 | -0.49052 | 0.624374 | 0.780027 | -5.36278 |
| AL133406.2 | -0.13438 | 7.203948 | -0.49049 | 0.624396 | 0.780027 | -6.84809 |
| AL117341.1 | -0.836   | -0.44622 | -0.48981 | 0.62488  | 0.780423 | -5.40073 |
| AC127496.5 | -0.29823 | 4.650979 | -0.48946 | 0.625128 | 0.780423 | -6.26929 |
| AL139021.1 | -0.22361 | 5.545138 | -0.48956 | 0.625052 | 0.780423 | -6.48487 |
| AL035252.3 | -0.18112 | 6.926621 | -0.48962 | 0.625012 | 0.780423 | -6.78908 |
| AL022323.2 | 0.154703 | 4.93429  | 0.488869 | 0.625543 | 0.780812 | -6.10523 |
| AC108134.4 | -0.17369 | 6.520015 | -0.48783 | 0.626279 | 0.781601 | -6.70552 |
| AC073593.1 | -0.8399  | 0.163721 | -0.4875  | 0.626511 | 0.78176  | -5.43812 |
| AL096869.2 | 0.365336 | 3.32567  | 0.486473 | 0.627238 | 0.782407 | -5.67405 |
| AC005520.3 | 0.415574 | 5.585527 | 0.486475 | 0.627236 | 0.782407 | -6.18623 |
| AC137834.2 | 0.642349 | 2.571952 | 0.486042 | 0.627542 | 0.782657 | -5.51936 |
| AC135178.5 | 0.132062 | 6.97671  | 0.485255 | 0.628099 | 0.783092 | -6.75283 |
| AC002310.6 | -0.13671 | 7.363718 | -0.48526 | 0.628098 | 0.783092 | -6.8758  |
| AF106564.1 | 0.845889 | -1.39965 | 0.484351 | 0.628739 | 0.783629 | -5.32312 |
| AC091180.5 | 0.60522  | 3.638176 | 0.484444 | 0.628673 | 0.783629 | -5.69262 |
| AP001970.1 | 0.812667 | -0.34397 | 0.48392  | 0.629044 | 0.78388  | -5.35643 |
| AC074029.4 | 0.717035 | -2.42996 | 0.482308 | 0.630187 | 0.784392 | -5.30581 |
| LINC01381  | -0.79851 | -1.82814 | -0.48242 | 0.630108 | 0.784392 | -5.35268 |



|            |          |          |          |          |          |          |
|------------|----------|----------|----------|----------|----------|----------|
| LINC01169  | 0.746467 | 2.682624 | 0.482836 | 0.629813 | 0.784392 | -5.51885 |
| AC107027.1 | 0.686899 | 2.788012 | 0.483067 | 0.629648 | 0.784392 | -5.54356 |
| AP000654.1 | 0.449631 | 4.066805 | 0.482786 | 0.629848 | 0.784392 | -5.73443 |
| AP002364.1 | -0.15627 | 4.700212 | -0.48268 | 0.629925 | 0.784392 | -6.17461 |
| LINC02041  | 0.717784 | 7.941405 | 0.482534 | 0.630027 | 0.784392 | -6.74762 |
| AC011466.4 | 0.247983 | 4.379816 | 0.481888 | 0.630484 | 0.784633 | -5.9283  |
| AC067817.2 | -0.15028 | 7.707737 | -0.48174 | 0.630592 | 0.784637 | -6.94584 |
| AC063944.3 | 0.860432 | -0.42167 | 0.480951 | 0.631149 | 0.78468  | -5.35397 |
| AC091153.2 | 0.369689 | 5.468889 | 0.481198 | 0.630973 | 0.78468  | -6.16945 |
| AC133528.1 | -0.21565 | 6.489128 | -0.48096 | 0.631144 | 0.78468  | -6.69816 |
| AC008074.2 | -0.14457 | 7.012    | -0.48121 | 0.630964 | 0.78468  | -6.82207 |
| AL031775.1 | 0.096795 | 8.321129 | 0.481333 | 0.630878 | 0.78468  | -7.00874 |
| AL031587.1 | 0.736017 | 0.299731 | 0.480512 | 0.63146  | 0.784937 | -5.38224 |
| AC007557.3 | -0.51066 | 0.683983 | -0.48017 | 0.631704 | 0.78511  | -5.45535 |
| AC245052.4 | 0.07621  | 6.4136   | 0.47935  | 0.632285 | 0.785703 | -6.62167 |
| AC007608.2 | -0.7093  | -0.05286 | -0.47846 | 0.632916 | 0.786356 | -5.42147 |
| AC093297.2 | 0.100066 | 9.141756 | 0.478183 | 0.633114 | 0.786472 | -7.13958 |
| AC012511.1 | 0.766784 | 2.205044 | 0.477782 | 0.633399 | 0.786696 | -5.48317 |
| AC078852.1 | 0.76596  | 2.228139 | 0.477529 | 0.633578 | 0.786789 | -5.48031 |
| AC093734.1 | 0.907101 | 0.114763 | 0.476525 | 0.634291 | 0.787545 | -5.37296 |
| AC106820.4 | -0.22781 | 4.240212 | -0.47586 | 0.634762 | 0.787985 | -5.99677 |
| AC087163.3 | 0.113517 | 6.424148 | 0.475731 | 0.634856 | 0.787985 | -6.62788 |
| AL356356.1 | -0.15283 | 7.692637 | -0.47541 | 0.635083 | 0.788137 | -6.95186 |
| C2CD4D-AS1 | -0.20123 | 9.594372 | -0.47515 | 0.635267 | 0.788234 | -7.24629 |
| AL133297.2 | 0.367752 | 5.025983 | 0.474732 | 0.635567 | 0.788476 | -6.04999 |
| CLIP1-AS1  | 0.132375 | 5.874332 | 0.47409  | 0.636024 | 0.788913 | -6.44774 |
| AL121944.1 | 0.122146 | 8.521865 | 0.473427 | 0.636496 | 0.789368 | -7.03918 |
| AL118522.1 | -0.63007 | 3.448966 | -0.47314 | 0.636702 | 0.789493 | -5.84425 |
| AC011899.3 | -0.52621 | 2.818555 | -0.47285 | 0.636908 | 0.789619 | -5.75466 |
| AL645940.1 | 0.260613 | 5.576238 | 0.472189 | 0.637377 | 0.79007  | -6.30447 |
| CU639417.5 | 0.30514  | 3.57899  | 0.471961 | 0.637539 | 0.790141 | -5.73045 |
| AC126696.2 | -0.31315 | 4.53929  | -0.47168 | 0.637741 | 0.79026  | -6.19814 |
| AL121950.1 | -0.72306 | -2.34057 | -0.47116 | 0.638108 | 0.790428 | -5.34114 |
| AL109659.3 | -0.63818 | 0.775676 | -0.47105 | 0.638192 | 0.790428 | -5.48131 |
| AC104463.2 | 0.359867 | 5.77835  | 0.471115 | 0.638142 | 0.790428 | -6.273   |
| AC024145.1 | -0.17552 | 6.307693 | -0.47025 | 0.63876  | 0.791001 | -6.67606 |
| AC137630.2 | 0.366843 | 4.445237 | 0.469282 | 0.639449 | 0.791724 | -5.91313 |
| AP001267.1 | 0.140764 | 3.666883 | 0.468213 | 0.640212 | 0.792537 | -5.785   |
| AC020907.3 | 0.635068 | 2.90416  | 0.467965 | 0.640389 | 0.792626 | -5.56621 |
| AL135786.2 | -0.70955 | 0.573183 | -0.46742 | 0.640779 | 0.792978 | -5.45724 |
| AC092296.1 | -0.7355  | 0.394511 | -0.46631 | 0.641569 | 0.793826 | -5.44841 |
| NFYC-AS1   | -0.10516 | 7.248698 | -0.46604 | 0.641764 | 0.793935 | -6.8619  |
| XIAP-AS1   | 0.285499 | 6.412534 | 0.465761 | 0.641963 | 0.794051 | -6.50116 |
| AC007278.2 | 0.767436 | -0.99482 | 0.465151 | 0.642399 | 0.794325 | -5.34413 |
| LINC02308  | -0.7762  | -1.02713 | -0.46492 | 0.64256  | 0.794325 | -5.38728 |
| AC010609.1 | -0.74567 | 0.708728 | -0.46476 | 0.64268  | 0.794325 | -5.47108 |
| AC022098.1 | 0.083811 | 7.117368 | 0.464711 | 0.642713 | 0.794325 | -6.80505 |
| AC116407.3 | 0.086024 | 7.871982 | 0.465259 | 0.642322 | 0.794325 | -6.94588 |
| AC112187.3 | 0.67207  | 2.863884 | 0.464536 | 0.642838 | 0.794349 | -5.58859 |
| AC083806.2 | -0.09267 | 5.383441 | -0.46376 | 0.643394 | 0.794644 | -6.3578  |
| AL442125.1 | -0.11336 | 6.493174 | -0.46378 | 0.643376 | 0.794644 | -6.7034  |
| AL136115.2 | 0.212357 | 6.875187 | 0.463765 | 0.64339  | 0.794644 | -6.72415 |
| AC025871.2 | -0.64726 | 2.602062 | -0.46356 | 0.643535 | 0.794687 | -5.67771 |
| AL442663.3 | 0.258054 | 4.907098 | 0.463414 | 0.64364  | 0.794687 | -6.02766 |
| AC099811.3 | 0.318744 | 5.286634 | 0.462142 | 0.64455  | 0.79568  | -6.16547 |
| AC007220.1 | 0.335387 | 5.069263 | 0.46176  | 0.644824 | 0.795887 | -6.02433 |
| AC020978.1 | -0.23221 | 5.521927 | -0.46146 | 0.645036 | 0.796017 | -6.44897 |
| AC100788.1 | 0.424503 | 3.999414 | 0.461173 | 0.645244 | 0.796144 | -5.82671 |

|             |          |          |          |          |          |          |
|-------------|----------|----------|----------|----------|----------|----------|
| AL022329.2  | -0.59408 | 1.787221 | -0.46058 | 0.645672 | 0.796221 | -5.55618 |
| AC104564.5  | -0.12187 | 5.451823 | -0.46049 | 0.645731 | 0.796221 | -6.37965 |
| AC018946.1  | 0.126198 | 6.324025 | 0.460822 | 0.645496 | 0.796221 | -6.56393 |
| AC068533.3  | 0.098108 | 7.79542  | 0.460576 | 0.645671 | 0.796221 | -6.93382 |
| AL121787.1  | -0.66137 | 1.072203 | -0.45981 | 0.646223 | 0.796339 | -5.49931 |
| AC021739.5  | 0.477156 | 5.146969 | 0.459769 | 0.64625  | 0.796339 | -6.12168 |
| AC010618.3  | 0.109597 | 6.830403 | 0.459641 | 0.646342 | 0.796339 | -6.74779 |
| AL138831.3  | -0.12434 | 6.734468 | -0.45962 | 0.646356 | 0.796339 | -6.77075 |
| SCGB1B2P    | -0.13322 | 7.569663 | -0.45978 | 0.646239 | 0.796339 | -6.92749 |
| KCNJ2-AS1   | 0.209011 | 6.341391 | 0.459027 | 0.646781 | 0.796601 | -6.57121 |
| AL159169.2  | -0.13128 | 6.946731 | -0.45909 | 0.646734 | 0.796601 | -6.81828 |
| AC026801.2  | 0.160443 | 7.186975 | 0.458723 | 0.646999 | 0.796739 | -6.80032 |
| AC006330.1  | 0.103234 | 7.259586 | 0.458384 | 0.647242 | 0.796777 | -6.82486 |
| AC015849.4  | -0.10412 | 7.173518 | -0.45852 | 0.647141 | 0.796777 | -6.84833 |
| AL357552.2  | -0.17348 | 6.744702 | -0.45757 | 0.647824 | 0.797363 | -6.77972 |
| AC007370.2  | -0.49781 | 1.054367 | -0.45704 | 0.648206 | 0.797702 | -5.48525 |
| JADRR       | 0.683313 | -1.96271 | 0.456565 | 0.648547 | 0.797991 | -5.32256 |
| LINC00484   | -0.31831 | 2.596303 | -0.45602 | 0.64894  | 0.798344 | -5.64238 |
| LINC02097   | 0.574202 | 1.312136 | 0.455804 | 0.649093 | 0.798401 | -5.439   |
| AC017100.1  | -0.16919 | 7.36457  | -0.45549 | 0.64932  | 0.798549 | -6.90187 |
| AL136084.3  | -0.25667 | 7.40918  | -0.45519 | 0.649531 | 0.798679 | -6.92198 |
| AC108718.1  | 0.801743 | 2.149316 | 0.454519 | 0.650015 | 0.799093 | -5.48969 |
| AC105020.2  | -0.51968 | 2.95561  | -0.45443 | 0.650081 | 0.799093 | -5.71606 |
| LAMP5-AS1   | 0.667967 | -2.4474  | 0.453838 | 0.650505 | 0.799484 | -5.31701 |
| AC004771.4  | 0.507562 | 3.686579 | 0.453643 | 0.650645 | 0.799524 | -5.71734 |
| AL357568.1  | 0.587424 | 1.134678 | 0.452438 | 0.651511 | 0.800136 | -5.43448 |
| MRPL23-AS1  | 0.67599  | 1.239186 | 0.452676 | 0.65134  | 0.800136 | -5.43795 |
| AL139147.1  | 0.355945 | 4.664017 | 0.452559 | 0.651424 | 0.800136 | -5.97223 |
| AL354892.3  | -0.08396 | 6.754787 | -0.45236 | 0.651568 | 0.800136 | -6.75754 |
| AC010096.1  | -0.70321 | -1.36896 | -0.45157 | 0.652138 | 0.800443 | -5.37707 |
| AC104984.3  | -0.20437 | 5.957807 | -0.45161 | 0.652104 | 0.800443 | -6.57213 |
| AP003068.1  | -0.12632 | 7.011531 | -0.45181 | 0.651964 | 0.800443 | -6.82131 |
| AC009166.2  | 0.655911 | -1.6796  | 0.451047 | 0.652511 | 0.80077  | -5.33271 |
| AC138305.2  | 0.837335 | 2.414786 | 0.450164 | 0.653146 | 0.801419 | -5.50377 |
| AC093599.1  | 0.901601 | -0.09427 | 0.449786 | 0.653418 | 0.801622 | -5.37245 |
| LINC00471   | 0.345991 | 5.318084 | 0.449491 | 0.653631 | 0.801751 | -6.05717 |
| AC092338.3  | -0.11384 | 5.42725  | -0.4486  | 0.654275 | 0.802411 | -6.40788 |
| AC087627.1  | -0.59007 | 0.929375 | -0.44838 | 0.654432 | 0.80243  | -5.49272 |
| AC022517.1  | 0.729698 | 2.749031 | 0.448217 | 0.654548 | 0.80243  | -5.56953 |
| AC105001.1  | 0.145347 | 6.687773 | 0.44813  | 0.654611 | 0.80243  | -6.71063 |
| AC074135.1  | 0.536588 | 4.012712 | 0.447929 | 0.654756 | 0.802476 | -5.78025 |
| AC092068.1  | -0.74662 | -1.67111 | -0.44775 | 0.654885 | 0.802504 | -5.37121 |
| AC007546.1  | 0.115312 | 6.323717 | 0.447545 | 0.655032 | 0.802553 | -6.60682 |
| AC061975.1  | -0.58353 | -0.31787 | -0.44735 | 0.655173 | 0.802595 | -5.41475 |
| AP001437.1  | 0.328289 | 5.12459  | 0.447081 | 0.655367 | 0.802701 | -6.2251  |
| AC132803.1  | 0.780691 | -1.67032 | 0.446528 | 0.655765 | 0.802704 | -5.33197 |
| AL118508.3  | -0.373   | 3.168366 | -0.44655 | 0.655752 | 0.802704 | -5.78725 |
| C8orf37-AS1 | -0.23174 | 4.384533 | -0.44648 | 0.655796 | 0.802704 | -6.11172 |
| AC022613.3  | -0.15068 | 5.873023 | -0.44651 | 0.655781 | 0.802704 | -6.56697 |
| AC004828.1  | 0.792595 | -1.38466 | 0.446211 | 0.655994 | 0.802722 | -5.33824 |
| AC090023.2  | -0.53204 | 2.834531 | -0.44617 | 0.656025 | 0.802722 | -5.70173 |
| AL731684.1  | 0.838804 | -1.00047 | 0.444796 | 0.657014 | 0.803797 | -5.35183 |
| AC005614.1  | 0.517066 | -0.75957 | 0.444322 | 0.657356 | 0.803797 | -5.36634 |
| AC130448.2  | -0.77268 | -0.4706  | -0.44375 | 0.657767 | 0.803797 | -5.41805 |
| LINC01931   | -0.54945 | 1.051209 | -0.44306 | 0.658264 | 0.803797 | -5.48789 |
| AC010547.2  | -0.73685 | 3.015549 | -0.44324 | 0.658135 | 0.803797 | -5.75488 |
| AL135999.2  | -0.21726 | 3.402331 | -0.44329 | 0.658103 | 0.803797 | -5.80683 |
| AC044840.1  | -0.38823 | 4.67889  | -0.4434  | 0.65802  | 0.803797 | -6.16281 |

|             |          |          |          |          |          |          |
|-------------|----------|----------|----------|----------|----------|----------|
| AF127577.2  | -0.26268 | 4.774123 | -0.44317 | 0.65819  | 0.803797 | -6.23691 |
| AC087521.2  | 0.108063 | 5.455371 | 0.443041 | 0.65828  | 0.803797 | -6.32638 |
| AC009630.1  | -0.21005 | 5.232321 | -0.44406 | 0.657543 | 0.803797 | -6.33867 |
| AC103739.2  | 0.119288 | 5.781294 | 0.444503 | 0.657225 | 0.803797 | -6.42028 |
| AC037459.3  | -0.08434 | 8.954293 | -0.44395 | 0.657628 | 0.803797 | -7.14838 |
| AC005261.5  | 0.105097 | 9.974399 | 0.443022 | 0.658294 | 0.803797 | -7.27933 |
| AC022733.1  | -0.74141 | -0.13031 | -0.4427  | 0.658528 | 0.803952 | -5.43216 |
| AC133919.1  | 0.746236 | 0.657889 | 0.442297 | 0.658817 | 0.804174 | -5.4121  |
| AC091932.1  | -0.75917 | -0.73615 | -0.44065 | 0.660009 | 0.805499 | -5.40513 |
| AC018410.2  | 0.237498 | 6.418994 | 0.439973 | 0.660496 | 0.805962 | -6.60654 |
| AP001646.3  | 0.748227 | 0.627944 | 0.439523 | 0.660822 | 0.806035 | -5.4107  |
| AC095033.1  | 0.589079 | 1.154693 | 0.439689 | 0.660702 | 0.806035 | -5.43812 |
| AL022318.1  | -0.69976 | 0.103766 | -0.43945 | 0.660878 | 0.806035 | -5.44051 |
| AC068473.2  | -0.73466 | -1.57924 | -0.43915 | 0.661089 | 0.806162 | -5.37771 |
| AC107982.2  | 0.275523 | 5.965629 | 0.438981 | 0.661214 | 0.806183 | -6.32947 |
| AC097634.2  | -0.71215 | -1.94386 | -0.43866 | 0.661448 | 0.806207 | -5.36414 |
| AC079601.1  | 0.42861  | 1.654034 | 0.438772 | 0.661365 | 0.806207 | -5.47922 |
| AL138831.2  | -0.34901 | 4.236695 | -0.43827 | 0.66173  | 0.806242 | -6.10695 |
| AL163636.1  | -0.42881 | 4.855247 | -0.43817 | 0.661799 | 0.806242 | -6.15011 |
| AC084824.5  | 0.083495 | 8.191922 | 0.438443 | 0.661603 | 0.806242 | -7.01315 |
| AL357153.2  | 0.667921 | 1.857094 | 0.437431 | 0.662335 | 0.806765 | -5.47584 |
| AP003072.3  | -0.72995 | -1.43939 | -0.43719 | 0.662513 | 0.80685  | -5.37967 |
| LINC02475   | 0.68993  | 1.579178 | 0.437006 | 0.662643 | 0.806877 | -5.45648 |
| LINC01447   | 0.580316 | -0.76201 | 0.436233 | 0.663203 | 0.807429 | -5.36643 |
| AP004609.1  | -0.54229 | 0.933382 | -0.43576 | 0.663544 | 0.807697 | -5.49548 |
| AL606834.1  | 0.122381 | 8.292641 | 0.435631 | 0.663638 | 0.807697 | -7.01809 |
| TPRG1-AS1   | 0.373677 | 6.082182 | 0.435359 | 0.663835 | 0.807806 | -6.47942 |
| LMO7DN-IT1  | 0.846062 | 0.084965 | 0.434544 | 0.664426 | 0.808251 | -5.38826 |
| AC124017.1  | -0.57231 | -0.79953 | -0.43457 | 0.664404 | 0.808251 | -5.39987 |
| LINC01641   | -0.44383 | 0.73659  | -0.43441 | 0.664524 | 0.808251 | -5.47276 |
| LINC00173   | 0.337997 | 6.164773 | 0.434248 | 0.66464  | 0.808262 | -6.46596 |
| LIX1-AS1    | 0.382069 | 2.677021 | 0.433389 | 0.665263 | 0.808888 | -5.58959 |
| AC005592.1  | 0.647306 | -0.62397 | 0.432995 | 0.665549 | 0.808974 | -5.36968 |
| Z97192.2    | -0.30516 | 3.161384 | -0.43286 | 0.665645 | 0.808974 | -5.77063 |
| AP001625.2  | -0.22973 | 7.165315 | -0.43285 | 0.665657 | 0.808974 | -6.88521 |
| AC027130.1  | 0.399317 | 3.817187 | 0.432628 | 0.665815 | 0.809036 | -5.81397 |
| SPANXA2-OT1 | 0.674914 | -2.37955 | 0.431723 | 0.666471 | 0.80964  | -5.32517 |
| AC011509.2  | 0.760681 | -1.42758 | 0.431568 | 0.666584 | 0.80964  | -5.34345 |
| AC073314.1  | 0.382911 | 2.171778 | 0.431348 | 0.666743 | 0.80964  | -5.53457 |
| AP000346.1  | -0.34103 | 3.964287 | -0.43135 | 0.666739 | 0.80964  | -5.9861  |
| AC127496.4  | 0.700723 | 0.878671 | 0.430645 | 0.667254 | 0.809998 | -5.42618 |
| AC005006.1  | -0.57785 | 3.315603 | -0.4307  | 0.667212 | 0.809998 | -5.82653 |
| AC110760.2  | -0.50881 | 0.474878 | -0.42975 | 0.667903 | 0.810263 | -5.46298 |
| AL031428.1  | -0.58077 | 1.426403 | -0.43008 | 0.667667 | 0.810263 | -5.53631 |
| AL121845.4  | 0.186902 | 6.984342 | 0.429837 | 0.66784  | 0.810263 | -6.76916 |
| AL117209.1  | -0.10412 | 8.008204 | -0.42996 | 0.667748 | 0.810263 | -7.00876 |
| AF038458.3  | -0.48624 | 3.31507  | -0.42956 | 0.668044 | 0.810303 | -5.84276 |
| AC092140.1  | 0.536916 | 3.338054 | 0.428882 | 0.668534 | 0.810766 | -5.65783 |
| AC066613.2  | 0.636231 | 1.832748 | 0.428585 | 0.668749 | 0.810804 | -5.4797  |
| AL451085.1  | 0.481538 | 2.907755 | 0.428541 | 0.668781 | 0.810804 | -5.61135 |
| AC002059.1  | -0.21324 | 5.452998 | -0.42833 | 0.668934 | 0.810859 | -6.4091  |
| AC079416.3  | 0.608157 | 2.279831 | 0.426923 | 0.669957 | 0.811837 | -5.55006 |
| AL359881.1  | 0.834058 | 4.280934 | 0.427049 | 0.669866 | 0.811837 | -5.75155 |
| AC026992.1  | 0.710985 | -0.98715 | 0.426269 | 0.670433 | 0.812189 | -5.36089 |
| AC004076.2  | -0.09973 | 6.447712 | -0.42623 | 0.670464 | 0.812189 | -6.70451 |
| AC015911.3  | -0.28591 | 5.584955 | -0.42595 | 0.670665 | 0.812301 | -6.48696 |
| AC005785.1  | -0.06648 | 6.966789 | -0.42575 | 0.670807 | 0.812342 | -6.81875 |
| AC243773.2  | 0.698755 | 2.708091 | 0.42555  | 0.670956 | 0.812391 | -5.5503  |

|             |          |          |          |          |          |          |
|-------------|----------|----------|----------|----------|----------|----------|
| LINC00324   | -0.10079 | 7.829895 | -0.42499 | 0.671364 | 0.812755 | -6.98263 |
| AL645608.6  | 0.733644 | 2.270335 | 0.424529 | 0.671699 | 0.812936 | -5.52423 |
| LINC01694   | 0.281694 | 4.542401 | 0.424486 | 0.67173  | 0.812936 | -6.02556 |
| AL133343.2  | -0.74886 | -1.27633 | -0.42399 | 0.672092 | 0.81321  | -5.38901 |
| AL133523.1  | -0.30599 | 5.572659 | -0.42388 | 0.672173 | 0.81321  | -6.53433 |
| AC005696.3  | -0.38201 | 5.36203  | -0.42317 | 0.672686 | 0.8137   | -6.34304 |
| AC008781.2  | -0.20596 | 3.590293 | -0.42281 | 0.672947 | 0.813754 | -5.85253 |
| AC022498.2  | 0.10988  | 7.534314 | 0.422873 | 0.672904 | 0.813754 | -6.89888 |
| AC254562.3  | -0.11318 | 7.297836 | -0.42258 | 0.673117 | 0.813829 | -6.89397 |
| AC006435.2  | -0.09194 | 7.866326 | -0.4223  | 0.673322 | 0.813944 | -6.99673 |
| AL034546.1  | 0.527895 | -1.2197  | 0.422066 | 0.673492 | 0.81402  | -5.35875 |
| AC092652.1  | -0.70897 | -0.8878  | -0.4218  | 0.673687 | 0.814124 | -5.40389 |
| AC011840.2  | -0.61795 | -2.53054 | -0.42146 | 0.673936 | 0.814268 | -5.35018 |
| AC011369.2  | -0.66288 | 1.648676 | -0.42119 | 0.674131 | 0.814268 | -5.57369 |
| AC106873.1  | -0.59877 | 2.113969 | -0.42127 | 0.674073 | 0.814268 | -5.61147 |
| AL137779.1  | -0.149   | 6.197256 | -0.42096 | 0.674299 | 0.814339 | -6.65906 |
| AC025165.5  | -0.0832  | 8.171803 | -0.4204  | 0.674709 | 0.814704 | -7.0358  |
| AC087354.1  | 0.647251 | -1.33403 | 0.420142 | 0.674894 | 0.814797 | -5.35389 |
| AC092142.2  | -0.73514 | -1.58332 | -0.41975 | 0.675181 | 0.815012 | -5.38205 |
| AL451064.2  | -0.22822 | 4.503422 | -0.41921 | 0.675575 | 0.815095 | -6.16591 |
| AL929236.1  | 0.262084 | 5.645276 | 0.419247 | 0.675547 | 0.815095 | -6.34866 |
| AC087284.1  | -0.11642 | 7.799921 | -0.4194  | 0.675438 | 0.815095 | -6.9831  |
| AC007255.1  | 0.482461 | 6.228628 | 0.418872 | 0.675821 | 0.81526  | -6.37361 |
| LINC00895   | 0.639387 | -1.52152 | 0.418578 | 0.676035 | 0.815375 | -5.34989 |
| AC106037.1  | -0.18108 | 7.417563 | -0.41844 | 0.676133 | 0.815375 | -6.92384 |
| AC022537.1  | -0.70792 | -0.74956 | -0.41798 | 0.676471 | 0.81539  | -5.41352 |
| AP003721.1  | -0.45946 | 3.408677 | -0.41809 | 0.676388 | 0.81539  | -5.80082 |
| AC098820.1  | 0.136792 | 6.026156 | 0.418008 | 0.676451 | 0.81539  | -6.49102 |
| RPS6KA2-IT1 | -0.32825 | 4.642029 | -0.41696 | 0.677213 | 0.816022 | -6.17014 |
| AC010530.1  | -0.07797 | 6.964082 | -0.41704 | 0.67716  | 0.816022 | -6.81648 |
| AL133243.4  | 0.106345 | 5.688539 | 0.416214 | 0.677761 | 0.816552 | -6.43117 |
| LINC00552   | -0.58328 | 0.090955 | -0.41566 | 0.678168 | 0.816888 | -5.44585 |
| AL158212.2  | 0.228236 | 5.340907 | 0.415534 | 0.678258 | 0.816888 | -6.30931 |
| AL158834.1  | 0.596109 | 2.25804  | 0.41517  | 0.678523 | 0.817077 | -5.51755 |
| AL390955.2  | -0.25771 | 5.220143 | -0.41502 | 0.678632 | 0.817077 | -6.37065 |
| AP003108.3  | -0.17331 | 3.293199 | -0.41417 | 0.679253 | 0.817563 | -5.7867  |
| AC021739.3  | -0.27567 | 5.227914 | -0.41427 | 0.67918  | 0.817563 | -6.39911 |
| EFCAB6-AS1  | -0.54633 | -0.08285 | -0.41329 | 0.679899 | 0.81762  | -5.435   |
| AC073592.9  | 0.674168 | 1.651394 | 0.412997 | 0.680111 | 0.81762  | -5.48171 |
| U62317.3    | -0.27917 | 5.202103 | -0.41269 | 0.680338 | 0.81762  | -6.35461 |
| AC231981.1  | 0.133192 | 5.773312 | 0.413139 | 0.680008 | 0.81762  | -6.42489 |
| AL358852.1  | -0.10339 | 6.026042 | -0.41288 | 0.680198 | 0.81762  | -6.61083 |
| LINC00899   | 0.11719  | 6.476895 | 0.413571 | 0.679692 | 0.81762  | -6.65709 |
| AC000120.1  | -0.13577 | 6.433542 | -0.41262 | 0.680388 | 0.81762  | -6.71469 |
| AC131159.1  | -0.22012 | 6.740697 | -0.41284 | 0.680225 | 0.81762  | -6.80279 |
| AP001178.2  | -0.16822 | 7.632331 | -0.41333 | 0.679869 | 0.81762  | -6.97336 |
| AC245060.5  | -0.13245 | 8.935495 | -0.41379 | 0.679529 | 0.81762  | -7.17102 |
| AC007342.5  | 0.296399 | 8.248044 | 0.411802 | 0.680986 | 0.818207 | -6.98807 |
| AC069209.1  | 0.546747 | 3.001412 | 0.411593 | 0.681139 | 0.818259 | -5.61735 |
| AC010980.2  | 0.293574 | 5.661372 | 0.411296 | 0.681356 | 0.818259 | -6.40323 |
| FARSA-AS1   | -0.25052 | 6.241909 | -0.41132 | 0.681335 | 0.818259 | -6.70924 |
| AC009093.7  | -0.48634 | 1.675174 | -0.41091 | 0.681637 | 0.818412 | -5.56029 |
| AL603839.4  | 0.307508 | 4.523594 | 0.410824 | 0.681701 | 0.818412 | -6.02485 |
| AC009268.2  | 0.267249 | 5.531383 | 0.410171 | 0.68218  | 0.818856 | -6.31919 |
| AC009163.5  | -0.76333 | 0.318901 | -0.4085  | 0.683405 | 0.819725 | -5.46452 |
| STARD13-IT1 | -0.66737 | 0.451661 | -0.40868 | 0.683271 | 0.819725 | -5.46963 |
| AL022323.3  | -0.12465 | 4.415609 | -0.40887 | 0.683135 | 0.819725 | -6.05472 |
| AL731577.1  | -0.10975 | 5.383524 | -0.40814 | 0.683668 | 0.819725 | -6.39518 |

|            |          |          |          |          |          |          |
|------------|----------|----------|----------|----------|----------|----------|
| AL662884.1 | 0.108094 | 5.822079 | 0.408925 | 0.683092 | 0.819725 | -6.46847 |
| AL662844.4 | -0.09126 | 6.622216 | -0.40838 | 0.683492 | 0.819725 | -6.74348 |
| AL136295.7 | -0.05994 | 9.279863 | -0.40816 | 0.683653 | 0.819725 | -7.21268 |
| AL355112.1 | -0.64889 | -0.91359 | -0.40718 | 0.68437  | 0.820436 | -5.40772 |
| AC004825.2 | 0.137872 | 6.778344 | 0.406215 | 0.685078 | 0.821154 | -6.76714 |
| AL157832.1 | 0.685825 | 2.026833 | 0.40566  | 0.685486 | 0.821179 | -5.49943 |
| AL359258.3 | 0.325212 | 2.575869 | 0.40559  | 0.685536 | 0.821179 | -5.58288 |
| AC005546.1 | 0.15599  | 7.276447 | 0.405817 | 0.68537  | 0.821179 | -6.85051 |
| AP003469.4 | -0.12191 | 7.989724 | -0.40594 | 0.685282 | 0.821179 | -7.02188 |
| AC011462.5 | -0.09706 | 7.830796 | -0.40514 | 0.68587  | 0.821447 | -6.99358 |
| BFSP2-AS1  | -0.64379 | -0.47704 | -0.40412 | 0.686616 | 0.822011 | -5.42558 |
| AC007570.1 | 0.348475 | 4.233192 | 0.403749 | 0.686888 | 0.822011 | -5.94039 |
| AP001351.1 | 0.247949 | 5.44115  | 0.403975 | 0.686721 | 0.822011 | -6.1927  |
| AC009137.2 | 0.187355 | 5.240254 | 0.40383  | 0.686828 | 0.822011 | -6.22808 |
| AC006449.2 | 0.101528 | 7.184701 | 0.403835 | 0.686824 | 0.822011 | -6.84227 |
| AL392183.1 | -0.53192 | -0.89336 | -0.40277 | 0.687609 | 0.822449 | -5.407   |
| AB015752.1 | 0.676678 | 0.489699 | 0.402655 | 0.687691 | 0.822449 | -5.42067 |
| AP002992.1 | 0.613552 | 1.516194 | 0.402719 | 0.687644 | 0.822449 | -5.46628 |
| AC108727.1 | 0.186109 | 7.783802 | 0.402728 | 0.687637 | 0.822449 | -6.93542 |
| GOLGA8M    | -0.66116 | -1.87314 | -0.40212 | 0.688085 | 0.822658 | -5.37973 |
| LINC01055  | 0.419897 | 2.634238 | 0.402184 | 0.688037 | 0.822658 | -5.57501 |
| AC111170.2 | 0.549712 | 2.174162 | 0.401732 | 0.688369 | 0.822862 | -5.53527 |
| AC025162.2 | 0.312498 | 4.52464  | 0.401588 | 0.688474 | 0.822862 | -5.97623 |
| DPP9-AS1   | -0.0708  | 6.124801 | -0.40143 | 0.688594 | 0.822874 | -6.61273 |
| AL137186.2 | 0.071617 | 6.917168 | 0.400897 | 0.688982 | 0.823207 | -6.78947 |
| AC124248.1 | 0.275847 | 7.482117 | 0.400306 | 0.689417 | 0.823595 | -6.8599  |
| AC097724.1 | 0.52913  | 4.221137 | 0.399978 | 0.689658 | 0.823666 | -5.81155 |
| AC016027.3 | 0.354473 | 4.938782 | 0.399927 | 0.689695 | 0.823666 | -6.04482 |
| AL353726.2 | 0.654404 | -0.18121 | 0.399727 | 0.689842 | 0.823711 | -5.3959  |
| AC243960.7 | -0.66134 | -0.81289 | -0.39945 | 0.690048 | 0.823824 | -5.41566 |
| AC007953.1 | 0.720836 | -0.68076 | 0.398808 | 0.690518 | 0.824035 | -5.37872 |
| AC074194.1 | 0.597101 | 4.661867 | 0.398612 | 0.690662 | 0.824035 | -5.8845  |
| INO80-AS1  | 0.161003 | 5.373173 | 0.398748 | 0.690562 | 0.824035 | -6.31785 |
| BOLA3-AS1  | 0.163234 | 7.185794 | 0.398733 | 0.690573 | 0.824035 | -6.84309 |
| RSF1-IT2   | 0.251638 | 5.159966 | 0.39786  | 0.691216 | 0.824564 | -6.21665 |
| AC016168.3 | 0.527096 | -0.79231 | 0.39635  | 0.692327 | 0.825657 | -5.37995 |
| AC005703.4 | 0.65334  | 0.398143 | 0.396167 | 0.692462 | 0.825657 | -5.41871 |
| AL606469.1 | -0.60845 | 0.066444 | -0.39631 | 0.692355 | 0.825657 | -5.45196 |
| AL355377.2 | 0.324271 | 3.071565 | 0.395848 | 0.692696 | 0.825711 | -5.68492 |
| AC010531.3 | 0.33403  | 5.062189 | 0.395807 | 0.692727 | 0.825711 | -6.1072  |
| AC018892.3 | -0.33356 | 2.493416 | -0.39544 | 0.692996 | 0.825901 | -5.65209 |
| AL365181.4 | -0.61558 | 0.98051  | -0.39522 | 0.693157 | 0.825962 | -5.50402 |
| AC245884.9 | 0.45486  | 4.346237 | 0.394098 | 0.693986 | 0.826687 | -5.89078 |
| AC009148.1 | 0.107923 | 4.890243 | 0.394212 | 0.693902 | 0.826687 | -6.17567 |
| SHANK2-AS2 | 0.675423 | 4.178216 | 0.393782 | 0.694219 | 0.826833 | -5.73532 |
| AC003957.1 | 0.3613   | 1.999355 | 0.392461 | 0.695193 | 0.827731 | -5.53083 |
| AL360268.1 | 0.234062 | 5.397114 | 0.392527 | 0.695144 | 0.827731 | -6.32487 |
| AC079313.1 | 0.307938 | 5.875015 | 0.391859 | 0.695636 | 0.827997 | -6.3991  |
| AC098851.1 | -0.17266 | 7.021124 | -0.39191 | 0.6956   | 0.827997 | -6.87897 |
| AC100786.1 | 0.138856 | 5.351367 | 0.391345 | 0.696016 | 0.828317 | -6.29283 |
| AC004918.1 | -0.08506 | 9.148103 | -0.39086 | 0.696376 | 0.828615 | -7.1996  |
| AC017104.3 | -0.23818 | 5.322601 | -0.3905  | 0.696637 | 0.828662 | -6.43384 |
| AC097381.3 | -0.29235 | 5.766299 | -0.39057 | 0.696587 | 0.828662 | -6.55747 |
| SPACA6P-AS | 0.364556 | 1.922041 | 0.390005 | 0.697004 | 0.828968 | -5.52784 |
| AL731567.1 | 0.281863 | 6.084537 | 0.389435 | 0.697425 | 0.829075 | -6.54547 |
| AL137779.2 | -0.09726 | 6.716294 | -0.38944 | 0.697422 | 0.829075 | -6.78021 |
| AC253576.2 | -0.21252 | 6.983166 | -0.38973 | 0.697207 | 0.829075 | -6.87009 |
| AL353596.1 | -0.52343 | 1.93171  | -0.3892  | 0.6976   | 0.829151 | -5.59397 |

|            |          |          |          |          |          |          |
|------------|----------|----------|----------|----------|----------|----------|
| AC022336.3 | 0.168724 | 4.366991 | 0.388023 | 0.698468 | 0.830052 | -5.99816 |
| AC027796.5 | -0.32941 | 4.585851 | -0.38784 | 0.698602 | 0.83008  | -6.10815 |
| AC104836.1 | -0.35386 | 3.023961 | -0.38729 | 0.699007 | 0.830431 | -5.74781 |
| AC104170.2 | 0.099287 | 6.542743 | 0.387139 | 0.699121 | 0.830434 | -6.68177 |
| AC078962.2 | 0.666809 | -1.56471 | 0.386809 | 0.699365 | 0.830462 | -5.35763 |
| LMLN-AS1   | 0.612715 | 1.211072 | 0.386854 | 0.699332 | 0.830462 | -5.45795 |
| AC135983.1 | 0.601355 | -1.57156 | 0.385977 | 0.69998  | 0.830502 | -5.35997 |
| KCNQ1DN    | -0.60099 | -2.11788 | -0.3852  | 0.700555 | 0.830502 | -5.37283 |
| AC097478.2 | 0.718399 | -0.50195 | 0.385986 | 0.699974 | 0.830502 | -5.38791 |
| LINC01918  | 0.662936 | -0.24041 | 0.384837 | 0.700823 | 0.830502 | -5.39821 |
| AC011462.4 | -0.4963  | 2.47133  | -0.38518 | 0.700568 | 0.830502 | -5.65831 |
| AL121772.2 | 0.607126 | 3.83789  | 0.384822 | 0.700834 | 0.830502 | -5.76977 |
| FAM66A     | -0.43123 | 3.052905 | -0.38521 | 0.700545 | 0.830502 | -5.77037 |
| AL162413.1 | 1.578531 | 5.873466 | 0.38505  | 0.700665 | 0.830502 | -5.88049 |
| AC015819.2 | -0.39491 | 3.470757 | -0.38539 | 0.70041  | 0.830502 | -5.90837 |
| AC004951.4 | -0.11945 | 5.307303 | -0.38608 | 0.699903 | 0.830502 | -6.41867 |
| AL357054.4 | -0.16491 | 5.71551  | -0.3855  | 0.700334 | 0.830502 | -6.50702 |
| AC008537.3 | 0.119701 | 6.135285 | 0.384819 | 0.700836 | 0.830502 | -6.61306 |
| AC090948.3 | 0.16687  | 6.845361 | 0.385512 | 0.700324 | 0.830502 | -6.76349 |
| AP000688.4 | 0.680034 | -1.68906 | 0.384486 | 0.701082 | 0.830531 | -5.35556 |
| AC104581.4 | -0.06589 | 6.037073 | -0.3846  | 0.701    | 0.830531 | -6.58729 |
| PARD3-AS1  | 0.35027  | 6.248061 | 0.383495 | 0.701816 | 0.831269 | -6.58356 |
| AL109910.2 | 0.564433 | -2.68548 | 0.382756 | 0.702363 | 0.831655 | -5.3391  |
| AC011284.1 | 0.549619 | 3.377445 | 0.382759 | 0.702361 | 0.831655 | -5.66181 |
| AL353708.3 | 0.151025 | 5.918771 | 0.381394 | 0.703371 | 0.832586 | -6.49179 |
| AC027307.3 | -0.15007 | 6.026692 | -0.3814  | 0.703363 | 0.832586 | -6.62195 |
| LINC00565  | 0.227446 | 3.546482 | 0.381039 | 0.703634 | 0.832688 | -5.83401 |
| AC004908.1 | -0.09873 | 7.992294 | -0.38098 | 0.703679 | 0.832688 | -7.03463 |
| AL356750.1 | -0.31678 | 2.961937 | -0.38057 | 0.703983 | 0.832917 | -5.72475 |
| AP002884.2 | -0.58746 | 0.41557  | -0.38041 | 0.704098 | 0.832922 | -5.4697  |
| AC068790.5 | -0.08721 | 7.526854 | -0.38021 | 0.704249 | 0.832969 | -6.94332 |
| AC005021.1 | -0.3079  | 5.754151 | -0.37992 | 0.70446  | 0.833088 | -6.63153 |
| AL121890.5 | 0.563316 | 4.19431  | 0.379021 | 0.705129 | 0.833605 | -5.80268 |
| AC005740.4 | 0.252053 | 4.585627 | 0.378885 | 0.70523  | 0.833605 | -5.99857 |
| THOC7-AS1  | 0.300393 | 4.935091 | 0.379039 | 0.705116 | 0.833605 | -6.13615 |
| AL512631.2 | 0.379481 | 2.84849  | 0.37873  | 0.705345 | 0.83361  | -5.63363 |
| AC104590.1 | 0.324641 | 2.623699 | 0.378198 | 0.705739 | 0.833944 | -5.60406 |
| LINC00909  | -0.08148 | 8.482493 | -0.37786 | 0.705993 | 0.834114 | -7.1016  |
| STEAP3-AS1 | 0.155733 | 5.355612 | 0.376389 | 0.707081 | 0.835267 | -6.32457 |
| LINC01729  | -0.66046 | -1.30766 | -0.37562 | 0.70765  | 0.835808 | -5.40405 |
| AC090061.1 | 0.127443 | 4.39019  | 0.375063 | 0.708066 | 0.836167 | -5.99589 |
| AL139339.1 | 0.450695 | 3.415049 | 0.374644 | 0.708376 | 0.836251 | -5.69534 |
| AC007292.3 | -0.3827  | 4.058796 | -0.37452 | 0.708471 | 0.836251 | -6.02112 |
| TNKS2-AS1  | -0.14678 | 5.680628 | -0.37471 | 0.708325 | 0.836251 | -6.53138 |
| AL020993.1 | 0.379027 | 4.812843 | 0.373405 | 0.709297 | 0.837095 | -6.10082 |
| AC034229.2 | 0.520021 | -2.86743 | 0.372448 | 0.710007 | 0.837144 | -5.3412  |
| AC087045.2 | 0.623053 | -1.88513 | 0.372477 | 0.709986 | 0.837144 | -5.35405 |
| AC003682.1 | 0.623583 | 1.807796 | 0.372867 | 0.709696 | 0.837144 | -5.50362 |
| AF064858.2 | 0.664204 | 3.234977 | 0.373165 | 0.709475 | 0.837144 | -5.65296 |
| CERNA1     | -0.0827  | 6.055104 | -0.3726  | 0.709894 | 0.837144 | -6.61998 |
| AL049838.1 | -0.22606 | 6.442759 | -0.3726  | 0.709895 | 0.837144 | -6.84955 |
| AC009060.1 | 0.513186 | -1.68003 | 0.372031 | 0.710318 | 0.837248 | -5.36254 |
| AC133961.1 | -0.48175 | 1.953169 | -0.37212 | 0.710248 | 0.837248 | -5.61012 |
| AC090377.1 | 0.537897 | -0.5462  | 0.371539 | 0.710683 | 0.837485 | -5.39659 |
| AC139149.1 | -0.14496 | 6.233802 | -0.37146 | 0.710742 | 0.837485 | -6.69267 |
| AC055855.2 | 0.639884 | -0.29275 | 0.371126 | 0.71099  | 0.837646 | -5.40176 |
| OTUD6B-AS1 | -0.0596  | 9.993907 | -0.37043 | 0.711508 | 0.838125 | -7.3302  |
| AC068254.2 | -0.48183 | -2.25993 | -0.36971 | 0.712043 | 0.838415 | -5.37131 |

|              |          |          |          |          |          |          |
|--------------|----------|----------|----------|----------|----------|----------|
| FAM87B       | 0.143806 | 4.907434 | 0.36973  | 0.712028 | 0.838415 | -6.23178 |
| AL049840.4   | -0.07605 | 11.29429 | -0.36965 | 0.712089 | 0.838415 | -7.5233  |
| ARHGEF38-IT1 | -0.68741 | 1.508186 | -0.36907 | 0.712516 | 0.838524 | -5.56112 |
| LINC00311    | 0.228439 | 4.015436 | 0.36927  | 0.71237  | 0.838524 | -5.89473 |
| AC139792.1   | -0.19008 | 5.484267 | -0.36918 | 0.712437 | 0.838524 | -6.4728  |
| Z93022.1     | -0.52397 | -0.44955 | -0.36865 | 0.712828 | 0.83857  | -5.4369  |
| AC007998.4   | 0.331387 | 2.318509 | 0.368572 | 0.71289  | 0.83857  | -5.57897 |
| AL035071.1   | 0.079572 | 9.42083  | 0.368608 | 0.712863 | 0.83857  | -7.22822 |
| LINC01058    | -0.36431 | 4.065094 | -0.3682  | 0.713164 | 0.838761 | -6.09885 |
| AC035140.1   | 0.645011 | -0.88806 | 0.368006 | 0.713311 | 0.838802 | -5.38696 |
| AL033381.2   | -0.584   | 1.06332  | -0.36725 | 0.713873 | 0.839331 | -5.53597 |
| AL158835.2   | -0.27095 | 5.607295 | -0.36708 | 0.714002 | 0.839352 | -6.5246  |
| AC006042.2   | -0.35912 | 3.48817  | -0.36616 | 0.714688 | 0.839904 | -5.86821 |
| AL022323.5   | -0.14336 | 4.099429 | -0.36615 | 0.714695 | 0.839904 | -5.99384 |
| AL033527.2   | 0.478543 | 2.952689 | 0.365946 | 0.714845 | 0.839949 | -5.63902 |
| AL096869.1   | -0.56198 | 0.26417  | -0.36569 | 0.715036 | 0.839992 | -5.4666  |
| AL365226.1   | 0.428747 | 4.452315 | 0.365596 | 0.715106 | 0.839992 | -5.90915 |
| DIO2-AS1     | 0.620134 | -0.95605 | 0.364122 | 0.716204 | 0.84     | -5.38322 |
| AC079465.1   | -0.39395 | 1.755464 | -0.36464 | 0.715821 | 0.84     | -5.58605 |
| AC006111.3   | 0.472881 | 3.531913 | 0.364638 | 0.715819 | 0.84     | -5.73015 |
| AC007342.1   | -0.1573  | 5.519158 | -0.36468 | 0.715791 | 0.84     | -6.44634 |
| AC131212.3   | -0.09956 | 7.171501 | -0.36427 | 0.716092 | 0.84     | -6.87849 |
| AC009032.1   | -0.09726 | 7.409478 | -0.365   | 0.715552 | 0.84     | -6.93392 |
| AP001462.1   | 0.073915 | 7.698003 | 0.365169 | 0.715424 | 0.84     | -6.95588 |
| AC118553.1   | -0.10117 | 7.639443 | -0.36409 | 0.716231 | 0.84     | -6.96504 |
| AC005086.1   | -0.09442 | 8.253253 | -0.36482 | 0.715684 | 0.84     | -7.07268 |
| PTOV1-AS1    | 0.059143 | 9.460181 | 0.364487 | 0.715932 | 0.84     | -7.23813 |
| NAV2-AS3     | 0.626211 | 0.526921 | 0.36344  | 0.716713 | 0.840172 | -5.43302 |
| AC090587.2   | -0.11995 | 6.911438 | -0.36357 | 0.716616 | 0.840172 | -6.85374 |
| AC005034.3   | -0.06175 | 10.39402 | -0.36353 | 0.716646 | 0.840172 | -7.3915  |
| AC136604.3   | 0.111265 | 6.204932 | 0.363118 | 0.716953 | 0.840191 | -6.55916 |
| AC025580.1   | -0.3255  | 6.116216 | -0.36313 | 0.716947 | 0.840191 | -6.69883 |
| AL356218.1   | 0.681971 | -1.39284 | 0.362684 | 0.717276 | 0.840214 | -5.36979 |
| AC008667.1   | -0.52334 | 1.923082 | -0.36234 | 0.717531 | 0.840214 | -5.60852 |
| AC124944.1   | 0.404701 | 3.277537 | 0.362421 | 0.717473 | 0.840214 | -5.70838 |
| Z97832.2     | 0.098237 | 5.48225  | 0.362634 | 0.717314 | 0.840214 | -6.39331 |
| AC010536.2   | -0.18836 | 7.346162 | -0.3629  | 0.717114 | 0.840214 | -6.92662 |
| AL356515.1   | 0.693621 | -1.36185 | 0.361942 | 0.71783  | 0.840301 | -5.37089 |
| AC091534.1   | 0.499758 | -0.93926 | 0.361968 | 0.71781  | 0.840301 | -5.38933 |
| AC114737.1   | -0.22325 | 6.026273 | -0.36163 | 0.718063 | 0.840444 | -6.64262 |
| LATS2-AS1    | -0.34821 | 3.785371 | -0.36127 | 0.718333 | 0.840628 | -5.92631 |
| AL450468.1   | -0.63796 | -0.66533 | -0.3606  | 0.718831 | 0.840794 | -5.42779 |
| AC012213.4   | 0.798709 | 1.762897 | 0.360503 | 0.718904 | 0.840794 | -5.48727 |
| AC011933.3   | 0.335777 | 4.945453 | 0.360781 | 0.718696 | 0.840794 | -6.09247 |
| AL513122.2   | -0.23872 | 4.716148 | -0.36048 | 0.718922 | 0.840794 | -6.21422 |
| TMSB15B-AS1  | 0.293807 | 4.047063 | 0.3599   | 0.719354 | 0.840991 | -5.91326 |
| AC073573.1   | -0.33805 | 3.833956 | -0.3598  | 0.719426 | 0.840991 | -5.94716 |
| LINC00543    | -0.39799 | 5.620605 | -0.35988 | 0.719372 | 0.840991 | -6.51932 |
| AC093152.1   | 0.601185 | -1.00025 | 0.358473 | 0.720419 | 0.842021 | -5.3854  |
| AC068397.1   | -0.33738 | 4.389985 | -0.35808 | 0.720713 | 0.842234 | -6.08905 |
| AC105935.2   | -0.45925 | 3.600996 | -0.35775 | 0.720962 | 0.842393 | -5.84638 |
| AC007342.4   | 0.24008  | 8.715948 | 0.357006 | 0.721515 | 0.842908 | -7.09123 |
| AC068594.2   | 0.49884  | 3.200285 | 0.356655 | 0.721777 | 0.843083 | -5.65598 |
| ITPKB-IT1    | 0.505161 | 1.10633  | 0.356126 | 0.722173 | 0.843152 | -5.46776 |
| AC023983.1   | 0.451827 | 4.242722 | 0.356297 | 0.722045 | 0.843152 | -5.85551 |
| AC104109.2   | -0.08915 | 6.423315 | -0.35614 | 0.722162 | 0.843152 | -6.71299 |
| AC022710.1   | 0.513139 | -1.37591 | 0.355683 | 0.722504 | 0.843175 | -5.37684 |
| KC877392.1   | -0.60781 | -0.32557 | -0.35527 | 0.722811 | 0.843175 | -5.44438 |

|            |          |          |          |          |          |          |
|------------|----------|----------|----------|----------|----------|----------|
| AL121917.2 | 0.660059 | 1.329941 | 0.35552  | 0.722626 | 0.843175 | -5.4685  |
| LINC00574  | 0.197186 | 4.513022 | 0.35528  | 0.722805 | 0.843175 | -6.03085 |
| CD81-AS1   | -0.1858  | 4.192511 | -0.35569 | 0.722498 | 0.843175 | -6.0955  |
| AC002128.2 | -0.15651 | 7.575315 | -0.35509 | 0.72295  | 0.843175 | -6.9663  |
| AL162274.2 | -0.08812 | 8.18208  | -0.35505 | 0.722978 | 0.843175 | -7.05673 |
| AL079304.1 | -0.54703 | 0.705301 | -0.35483 | 0.723142 | 0.843236 | -5.49373 |
| AC093422.2 | 0.596097 | -1.8014  | 0.353827 | 0.723892 | 0.843535 | -5.36332 |
| AC009145.2 | 0.637928 | -1.56893 | 0.353736 | 0.723961 | 0.843535 | -5.36784 |
| AL136526.1 | 0.249971 | 3.342383 | 0.353959 | 0.723793 | 0.843535 | -5.75372 |
| HOXB-AS2   | 0.223311 | 6.630385 | 0.353868 | 0.723862 | 0.843535 | -6.71034 |
| AP000692.1 | 0.073596 | 7.964454 | 0.354121 | 0.723672 | 0.843535 | -7.01311 |
| AL080312.2 | 0.588534 | -0.08012 | 0.352913 | 0.724576 | 0.843803 | -5.42033 |
| LINC01484  | -0.34133 | 2.704352 | -0.35313 | 0.724411 | 0.843803 | -5.69984 |
| AC090246.1 | -0.22007 | 6.152102 | -0.35297 | 0.72453  | 0.843803 | -6.67527 |
| SCAANT1    | -0.22256 | 6.163127 | -0.35269 | 0.724742 | 0.843803 | -6.702   |
| AL162171.2 | -0.10172 | 6.305681 | -0.35268 | 0.724752 | 0.843803 | -6.70998 |
| AC126773.1 | -0.15394 | 6.475369 | -0.35219 | 0.72512  | 0.8441   | -6.73119 |
| AC023310.4 | -0.61548 | 1.092311 | -0.35173 | 0.725463 | 0.844338 | -5.53297 |
| AC239800.2 | -0.46552 | 1.307264 | -0.35161 | 0.725549 | 0.844338 | -5.54766 |
| AL133342.1 | 0.344039 | 4.941561 | 0.351355 | 0.725742 | 0.844403 | -6.09145 |
| AC092123.1 | -0.06841 | 6.908675 | -0.35124 | 0.725829 | 0.844403 | -6.82742 |
| AC068790.9 | -0.12315 | 3.643341 | -0.3508  | 0.726157 | 0.844654 | -5.88505 |
| AC023509.1 | 0.260487 | 3.20205  | 0.34997  | 0.72678  | 0.845248 | -5.71427 |
| AC090617.4 | 0.080599 | 6.430744 | 0.349552 | 0.727093 | 0.845481 | -6.68712 |
| AC011447.6 | -0.4398  | 1.665032 | -0.349   | 0.72751  | 0.845703 | -5.57143 |
| AC025178.1 | -0.08565 | 6.657838 | -0.34909 | 0.727441 | 0.845703 | -6.78564 |
| AC025287.2 | 0.394933 | 3.851659 | 0.348716 | 0.727719 | 0.8458   | -5.80211 |
| LINC02656  | -0.18095 | 4.29224  | -0.34858 | 0.727818 | 0.8458   | -6.11711 |
| AP001469.1 | -0.13309 | 6.051278 | -0.34838 | 0.727971 | 0.845847 | -6.65648 |
| AC016629.2 | 0.492861 | 0.574684 | 0.347718 | 0.728468 | 0.846032 | -5.44821 |
| AC017101.1 | 0.355522 | 5.057546 | 0.348006 | 0.728252 | 0.846032 | -6.07667 |
| AC004000.1 | 0.160777 | 8.507489 | 0.347823 | 0.728389 | 0.846032 | -7.08417 |
| AC012613.1 | 0.569677 | 0.399966 | 0.347319 | 0.728767 | 0.846144 | -5.43903 |
| OSTN-AS1   | -0.56242 | 1.019636 | -0.34714 | 0.728903 | 0.846144 | -5.53208 |
| AC064801.1 | -0.15827 | 6.532982 | -0.34718 | 0.728869 | 0.846144 | -6.78475 |
| AC125603.2 | 0.654604 | -0.77185 | 0.346886 | 0.729091 | 0.846232 | -5.39354 |
| AC022730.4 | -0.52876 | -0.20061 | -0.34664 | 0.729279 | 0.84632  | -5.44944 |
| AL845552.2 | 0.431196 | 3.768248 | 0.346446 | 0.729422 | 0.846355 | -5.77373 |
| AC135050.7 | 0.080732 | 5.170858 | 0.345945 | 0.729798 | 0.84666  | -6.23235 |
| AC037487.2 | 0.197051 | 5.110687 | 0.345508 | 0.730125 | 0.846909 | -6.23714 |
| LINC02652  | -0.63366 | -0.59018 | -0.34509 | 0.730441 | 0.847145 | -5.43766 |
| AL355974.2 | 0.614358 | 0.984454 | 0.344719 | 0.730717 | 0.847217 | -5.45924 |
| AC093567.1 | 0.351222 | 3.287687 | 0.344704 | 0.730729 | 0.847217 | -5.74721 |
| AC105105.1 | 0.478852 | -1.46746 | 0.344338 | 0.731004 | 0.847324 | -5.37766 |
| AC110491.2 | -0.55291 | -1.84214 | -0.34428 | 0.731046 | 0.847324 | -5.3947  |
| AL133383.1 | 0.549312 | 0.697153 | 0.34334  | 0.731753 | 0.848012 | -5.447   |
| AP006621.2 | -0.09229 | 7.694582 | -0.34284 | 0.732132 | 0.84832  | -6.99095 |
| AC130343.2 | 0.537048 | 3.351833 | 0.342067 | 0.732709 | 0.848857 | -5.68598 |
| AC124068.2 | 0.161449 | 5.011564 | 0.341514 | 0.733124 | 0.849208 | -6.22006 |
| AP001269.2 | -0.62245 | -0.97867 | -0.34101 | 0.7335   | 0.849427 | -5.42458 |
| AC130651.1 | 0.266856 | 5.193448 | 0.340961 | 0.73354  | 0.849427 | -6.18469 |
| AL035416.1 | 0.413625 | 2.8909   | 0.340547 | 0.733851 | 0.849542 | -5.63495 |
| AC010834.3 | 0.066927 | 8.407629 | 0.340529 | 0.733865 | 0.849542 | -7.08298 |
| AC073957.3 | -0.11359 | 8.054248 | -0.34026 | 0.734068 | 0.849646 | -7.05685 |
| AC018665.1 | -0.07478 | 9.802646 | -0.3401  | 0.734185 | 0.84965  | -7.31614 |
| AC127540.1 | -0.54539 | -0.2448  | -0.33993 | 0.734315 | 0.84967  | -5.45071 |
| AC012640.4 | 0.099375 | 4.873592 | 0.339735 | 0.734461 | 0.849709 | -6.15532 |
| HMGA1P4    | 0.114583 | 8.396868 | 0.339572 | 0.734583 | 0.849719 | -7.06752 |



|            |          |          |          |          |          |          |
|------------|----------|----------|----------|----------|----------|----------|
| AP001056.1 | 0.570779 | -0.22874 | 0.339323 | 0.734771 | 0.849805 | -5.41679 |
| AL450384.1 | -0.19916 | 5.988544 | -0.33903 | 0.734989 | 0.84985  | -6.56306 |
| AC008870.2 | 0.06022  | 7.528874 | 0.338971 | 0.735036 | 0.84985  | -6.93778 |
| AL358781.2 | -0.20407 | 5.153114 | -0.33865 | 0.735273 | 0.849994 | -6.44651 |
| CHL1-AS1   | 0.5652   | -0.53703 | 0.338263 | 0.735568 | 0.850073 | -5.40527 |
| AC009065.3 | 0.335786 | 3.458221 | 0.338289 | 0.735548 | 0.850073 | -5.76146 |
| AP001453.1 | 0.122466 | 5.195425 | 0.338044 | 0.735733 | 0.850133 | -6.28773 |
| AL161725.2 | -0.44625 | 3.310846 | -0.33776 | 0.735949 | 0.850252 | -5.81074 |
| AC138230.1 | -0.11202 | 6.114684 | -0.33714 | 0.736415 | 0.850659 | -6.61502 |
| AC010307.2 | -0.48036 | 2.97678  | -0.33606 | 0.737226 | 0.851436 | -5.78884 |
| AL136418.1 | 0.213223 | 6.56705  | 0.335943 | 0.737314 | 0.851436 | -6.69232 |
| HLX-AS1    | 0.575858 | -0.38403 | 0.335632 | 0.737548 | 0.851575 | -5.41248 |
| AL137003.1 | 0.092123 | 7.932385 | 0.335465 | 0.737674 | 0.851589 | -7.00561 |
| AC104581.3 | 0.346987 | 1.777912 | 0.334825 | 0.738156 | 0.851943 | -5.52868 |
| AL357874.1 | -0.42323 | 2.119478 | -0.33476 | 0.738207 | 0.851943 | -5.62725 |
| MIF-AS1    | -0.12455 | 7.838868 | -0.33433 | 0.738525 | 0.85218  | -7.02861 |
| AC007497.1 | 0.238102 | 5.353716 | 0.333799 | 0.738929 | 0.852432 | -6.32326 |
| AL359922.3 | -0.17905 | 6.102284 | -0.33374 | 0.738971 | 0.852432 | -6.67241 |
| AL138733.2 | 0.557754 | -1.1299  | 0.332299 | 0.740059 | 0.853469 | -5.38741 |
| IL6R-AS1   | 0.213501 | 4.189951 | 0.332098 | 0.740211 | 0.853469 | -5.8846  |
| AC254633.1 | -0.18724 | 7.493558 | -0.33223 | 0.740113 | 0.853469 | -6.9908  |
| AC005197.1 | 0.51112  | 1.053167 | 0.331293 | 0.740818 | 0.853907 | -5.47518 |
| AC022167.2 | -0.0611  | 8.094168 | -0.33138 | 0.740752 | 0.853907 | -7.05738 |
| AL031673.1 | 0.106321 | 8.127969 | 0.330857 | 0.741146 | 0.854154 | -7.03933 |
| AL121835.2 | 0.497318 | -1.74464 | 0.330413 | 0.741481 | 0.854278 | -5.373   |
| AP001107.4 | -0.07405 | 6.978051 | -0.33056 | 0.741371 | 0.854278 | -6.85654 |
| U62631.1   | 0.619387 | -0.02304 | 0.330216 | 0.74163  | 0.854318 | -5.42347 |
| AC022150.4 | 0.168807 | 7.762654 | 0.329896 | 0.741871 | 0.854465 | -6.97988 |
| AC009084.1 | 0.664551 | -0.71363 | 0.329432 | 0.742221 | 0.854738 | -5.40073 |
| MPPED2-AS1 | 0.596395 | -1.55566 | 0.328755 | 0.742732 | 0.855039 | -5.37613 |
| AC097634.3 | 0.392955 | 2.446295 | 0.328685 | 0.742784 | 0.855039 | -5.59928 |
| NEBL-AS1   | -0.25726 | 6.139806 | -0.32858 | 0.742861 | 0.855039 | -6.69991 |
| ADNP-AS1   | -0.05201 | 8.965405 | -0.32848 | 0.742938 | 0.855039 | -7.18751 |
| AC104695.3 | -0.11984 | 8.375422 | -0.32801 | 0.743291 | 0.855314 | -7.11676 |
| ZBTB20-AS4 | -0.35675 | 3.508495 | -0.32711 | 0.743973 | 0.855968 | -5.82077 |
| AC005034.2 | 0.23845  | 4.992238 | 0.32683  | 0.744185 | 0.856044 | -6.14965 |
| AC103739.1 | -0.08317 | 6.759147 | -0.32672 | 0.744267 | 0.856044 | -6.79939 |
| AL359232.1 | 0.1903   | 4.294801 | 0.325942 | 0.744856 | 0.856358 | -6.00456 |
| AC069224.1 | -0.10267 | 6.319737 | -0.32606 | 0.744764 | 0.856358 | -6.71204 |
| FAM201A    | -0.15951 | 7.172913 | -0.32591 | 0.744882 | 0.856358 | -6.91572 |
| LINC02575  | 0.532763 | 5.797881 | 0.325643 | 0.745081 | 0.856456 | -6.24373 |
| AL137003.2 | 0.077343 | 7.918803 | 0.324852 | 0.745679 | 0.857011 | -7.00955 |
| AL031595.2 | 0.153589 | 0.85891  | 0.32445  | 0.745983 | 0.85723  | -5.48067 |
| AC100803.3 | -0.19218 | 4.324874 | -0.32418 | 0.746188 | 0.857335 | -6.15491 |
| AC092645.1 | 0.18794  | 5.683809 | 0.323102 | 0.747002 | 0.858138 | -6.41891 |
| LINC01364  | 0.503358 | 0.222655 | 0.322329 | 0.747586 | 0.858513 | -5.43808 |
| AL158070.1 | 0.506487 | 0.429696 | 0.322217 | 0.747671 | 0.858513 | -5.44442 |
| AC061975.7 | -0.41153 | 2.666986 | -0.32245 | 0.747498 | 0.858513 | -5.69229 |
| AC020910.5 | -0.08287 | 7.695867 | -0.32126 | 0.748397 | 0.859216 | -6.995   |
| LINC01838  | 0.482863 | -2.44691 | 0.320301 | 0.74912  | 0.859606 | -5.36052 |
| AC108451.1 | 0.444015 | -0.59738 | 0.320202 | 0.749195 | 0.859606 | -5.4126  |
| L29074.1   | 0.543585 | 1.474729 | 0.320402 | 0.749044 | 0.859606 | -5.49375 |
| AC093788.1 | 0.07971  | 7.556296 | 0.320289 | 0.749129 | 0.859606 | -6.94884 |
| AC121338.2 | 0.13812  | 6.816454 | 0.319609 | 0.749644 | 0.85999  | -6.7599  |
| AL355075.2 | 0.088391 | 6.950731 | 0.319107 | 0.750024 | 0.860231 | -6.82721 |
| AL021707.4 | -0.06972 | 7.139909 | -0.31903 | 0.750083 | 0.860231 | -6.89797 |
| AC104984.1 | 0.522135 | 0.238766 | 0.318708 | 0.750326 | 0.860323 | -5.4406  |
| AC006128.1 | -0.07349 | 8.573789 | -0.31862 | 0.750392 | 0.860323 | -7.13826 |

|             |          |          |          |          |          |          |
|-------------|----------|----------|----------|----------|----------|----------|
| AC016737.2  | -0.51074 | 1.590839 | -0.31753 | 0.751219 | 0.861139 | -5.57709 |
| AC005224.2  | 0.471862 | -2.58316 | 0.317115 | 0.751533 | 0.861236 | -5.35914 |
| AP002761.3  | 0.108837 | 5.90262  | 0.317226 | 0.751448 | 0.861236 | -6.55864 |
| AL162171.4  | -0.06335 | 5.789685 | -0.31672 | 0.751834 | 0.86145  | -6.55257 |
| AC104984.4  | -0.57756 | 0.133917 | -0.31642 | 0.752061 | 0.861579 | -5.48104 |
| AC008937.1  | -0.32034 | 2.63615  | -0.31605 | 0.752338 | 0.861633 | -5.70726 |
| AC145422.1  | -0.16795 | 5.874227 | -0.31606 | 0.752335 | 0.861633 | -6.60195 |
| AC012313.4  | 0.090053 | 7.807596 | 0.315786 | 0.752539 | 0.861733 | -6.98826 |
| AC026765.2  | 0.445339 | 0.318106 | 0.315138 | 0.75303  | 0.862032 | -5.44667 |
| AP003086.3  | 0.549764 | 1.61269  | 0.315219 | 0.752969 | 0.862032 | -5.50872 |
| AC022467.1  | 0.479423 | 0.814875 | 0.314334 | 0.75364  | 0.862086 | -5.47524 |
| AC010605.1  | 0.503359 | 1.325265 | 0.314432 | 0.753566 | 0.862086 | -5.48862 |
| AC136475.7  | -0.50208 | 0.941891 | -0.31472 | 0.753343 | 0.862086 | -5.52525 |
| AC079848.1  | -0.13586 | 6.081432 | -0.31459 | 0.753448 | 0.862086 | -6.65885 |
| AC145423.2  | 0.173025 | 7.006542 | 0.314319 | 0.753651 | 0.862086 | -6.81817 |
| ELMO1-AS1   | -0.52575 | -1.88282 | -0.3137  | 0.75412  | 0.862491 | -5.39942 |
| AC060766.4  | 0.10548  | 7.983304 | 0.31327  | 0.754447 | 0.862733 | -7.01439 |
| AC010632.2  | 0.193391 | 4.362566 | 0.312446 | 0.755072 | 0.863185 | -5.965   |
| AL136988.2  | 0.171123 | 5.98887  | 0.312528 | 0.75501  | 0.863185 | -6.56014 |
| AC011726.2  | -0.4232  | 1.995668 | -0.31216 | 0.755291 | 0.863305 | -5.64438 |
| AC015983.2  | -0.48372 | 1.308203 | -0.31182 | 0.755548 | 0.863336 | -5.54886 |
| AC011755.1  | -0.25249 | 2.852338 | -0.31187 | 0.755511 | 0.863336 | -5.72185 |
| AC108063.1  | 0.390254 | 3.503747 | 0.311525 | 0.75577  | 0.863458 | -5.75331 |
| FAM85B      | -0.26179 | 3.792138 | -0.31077 | 0.756343 | 0.863925 | -5.923   |
| AL359504.2  | 0.230156 | 5.082656 | 0.310684 | 0.756408 | 0.863925 | -6.25041 |
| AC032011.1  | -0.29817 | 2.418567 | -0.31022 | 0.756763 | 0.863934 | -5.66701 |
| FGF14-AS2   | -0.18308 | 5.913988 | -0.31009 | 0.75686  | 0.863934 | -6.68396 |
| AL034550.1  | -0.14633 | 6.813718 | -0.31016 | 0.756803 | 0.863934 | -6.82888 |
| AL136115.1  | -0.10319 | 7.009769 | -0.31007 | 0.756876 | 0.863934 | -6.87135 |
| AC009053.3  | -0.35168 | 2.927031 | -0.30965 | 0.757194 | 0.864165 | -5.77274 |
| AP002800.1  | 0.197228 | 6.255592 | 0.309415 | 0.757372 | 0.864236 | -6.62392 |
| AC018693.1  | 0.46416  | 1.503199 | 0.309112 | 0.757602 | 0.864341 | -5.50408 |
| AL358072.1  | -0.14481 | 5.355475 | -0.30899 | 0.757693 | 0.864341 | -6.43517 |
| SMAD1-AS1   | -0.51826 | -0.49511 | -0.30883 | 0.757817 | 0.864351 | -5.44926 |
| TMEM72-AS1  | -0.30401 | 1.276442 | -0.30867 | 0.757934 | 0.864353 | -5.53713 |
| AC125603.4  | -0.36497 | 1.834523 | -0.30842 | 0.758125 | 0.86444  | -5.60931 |
| AC092683.2  | 0.460099 | -1.41797 | 0.307852 | 0.758559 | 0.864672 | -5.3895  |
| Z95331.1    | -0.06149 | 4.690902 | -0.30794 | 0.758494 | 0.864672 | -6.17675 |
| STAU2-AS1   | 0.16386  | 4.858491 | 0.307479 | 0.758842 | 0.864864 | -6.13513 |
| AC099509.1  | 0.551956 | 1.546459 | 0.306636 | 0.759483 | 0.865463 | -5.50267 |
| AL391839.1  | 0.444259 | 3.181941 | 0.305717 | 0.760182 | 0.866128 | -5.70585 |
| AC073052.2  | 0.134755 | 4.520944 | 0.305422 | 0.760406 | 0.866252 | -6.06832 |
| BX323046.1  | -0.36815 | 2.748381 | -0.30482 | 0.760864 | 0.866515 | -5.74843 |
| AC090114.2  | 0.068119 | 8.089891 | 0.304815 | 0.760868 | 0.866515 | -7.05192 |
| AL355613.1  | 0.500535 | 0.848716 | 0.304544 | 0.761073 | 0.866618 | -5.47229 |
| AC006064.3  | -0.2036  | 5.103682 | -0.30399 | 0.761494 | 0.866966 | -6.37624 |
| FAM160A1-DT | 0.137192 | 8.212561 | 0.303689 | 0.761724 | 0.867095 | -7.04913 |
| AC004832.4  | -0.11414 | 6.728925 | -0.30325 | 0.76206  | 0.867347 | -6.8295  |
| AL138820.1  | -0.07499 | 4.665148 | -0.30215 | 0.762895 | 0.867888 | -6.20862 |
| AC012464.2  | -0.10287 | 5.159193 | -0.30207 | 0.762953 | 0.867888 | -6.29215 |
| AP003096.1  | -0.07914 | 6.496815 | -0.30201 | 0.762997 | 0.867888 | -6.76322 |
| RHOA-IT1    | -0.06396 | 7.938733 | -0.30224 | 0.762825 | 0.867888 | -7.03887 |
| AL356753.1  | 0.418737 | -0.69143 | 0.301404 | 0.763462 | 0.868204 | -5.41472 |
| AL035427.1  | 0.508727 | 0.416766 | 0.301042 | 0.763738 | 0.868204 | -5.45406 |
| AC090617.7  | -0.35087 | 4.572552 | -0.3012  | 0.76362  | 0.868204 | -6.26626 |
| AC092718.7  | -0.06291 | 6.271373 | -0.30119 | 0.763624 | 0.868204 | -6.68386 |
| SLC6A1-AS1  | 0.525467 | -1.02756 | 0.29952  | 0.764897 | 0.869121 | -5.40264 |
| AC103853.1  | -0.48692 | -0.44652 | -0.29893 | 0.765346 | 0.869121 | -5.4519  |

|              |          |          |          |          |          |          |
|--------------|----------|----------|----------|----------|----------|----------|
| AL133467.1   | 0.344979 | 3.269467 | 0.299228 | 0.765119 | 0.869121 | -5.77899 |
| AL357055.3   | 0.083317 | 5.983997 | 0.29892  | 0.765354 | 0.869121 | -6.56515 |
| AC007622.2   | 0.059381 | 6.637185 | 0.299226 | 0.765121 | 0.869121 | -6.76549 |
| AC092142.1   | 0.205039 | 7.122694 | 0.298938 | 0.76534  | 0.869121 | -6.79972 |
| AL031775.2   | -0.06208 | 8.126394 | -0.29942 | 0.764974 | 0.869121 | -7.07226 |
| AL022323.4   | -0.07263 | 5.579288 | -0.2986  | 0.7656   | 0.869269 | -6.47459 |
| AC078880.3   | 0.422156 | 0.779215 | 0.298338 | 0.765797 | 0.869361 | -5.46996 |
| NHS-AS1      | 0.54635  | -0.48125 | 0.2976   | 0.766359 | 0.869868 | -5.41943 |
| AC107464.1   | -0.42194 | -1.23259 | -0.29704 | 0.766788 | 0.8699   | -5.42064 |
| AP002360.2   | -0.31206 | 3.207565 | -0.29669 | 0.767055 | 0.8699   | -5.8275  |
| AC011933.2   | 0.084153 | 5.36802  | 0.296898 | 0.766895 | 0.8699   | -6.34808 |
| LINC02361    | -0.11445 | 6.281291 | -0.29665 | 0.767082 | 0.8699   | -6.68975 |
| AC008937.3   | -0.0715  | 6.378871 | -0.29705 | 0.766776 | 0.8699   | -6.72982 |
| AC009831.1   | 0.0692   | 6.513264 | 0.29688  | 0.766908 | 0.8699   | -6.7313  |
| AC080078.1   | 0.534459 | -1.43529 | 0.296033 | 0.767554 | 0.870042 | -5.38825 |
| AC005410.2   | -0.18998 | 5.343862 | -0.29618 | 0.767439 | 0.870042 | -6.41601 |
| AC005391.1   | 0.187119 | 6.786184 | 0.29614  | 0.767472 | 0.870042 | -6.77303 |
| AC140125.2   | -0.45206 | -1.05599 | -0.29587 | 0.767675 | 0.870047 | -5.4297  |
| OTX2-AS1     | 0.423643 | 0.130655 | 0.295304 | 0.76811  | 0.870408 | -5.44598 |
| AL163953.1   | 0.41803  | 3.949258 | 0.294954 | 0.768377 | 0.87058  | -5.87954 |
| AL133480.1   | -0.28184 | 3.4091   | -0.29431 | 0.768869 | 0.871006 | -5.82673 |
| AC112715.1   | 0.495573 | 1.796375 | 0.293406 | 0.769558 | 0.871129 | -5.5242  |
| AC103876.1   | -0.29749 | 3.406579 | -0.29343 | 0.769543 | 0.871129 | -5.84515 |
| AL049871.1   | -0.19601 | 4.147454 | -0.29371 | 0.769329 | 0.871129 | -6.06677 |
| AC010207.1   | 0.135874 | 4.530994 | 0.293807 | 0.769252 | 0.871129 | -6.14816 |
| AL359182.1   | 0.240797 | 6.202997 | 0.293839 | 0.769227 | 0.871129 | -6.57705 |
| AC104564.3   | -0.06691 | 7.064194 | -0.29301 | 0.769861 | 0.871342 | -6.88384 |
| LINC02671    | 0.454515 | -1.63894 | 0.292244 | 0.770444 | 0.871739 | -5.38587 |
| AC099509.2   | -0.56071 | -1.18847 | -0.29232 | 0.770386 | 0.871739 | -5.42788 |
| AC010271.1   | -0.16227 | 5.655165 | -0.29207 | 0.770575 | 0.871756 | -6.55277 |
| FOCAD-AS1    | 0.418453 | 2.687447 | 0.291481 | 0.771026 | 0.872135 | -5.6406  |
| AL138895.1   | 0.480473 | 4.132728 | 0.291096 | 0.77132  | 0.872336 | -5.78232 |
| AC007613.1   | 0.071875 | 4.657999 | 0.290256 | 0.771962 | 0.872704 | -6.11674 |
| WWC2-AS2     | -0.10565 | 5.078395 | -0.29021 | 0.771994 | 0.872704 | -6.33951 |
| AC012313.9   | 0.173044 | 5.634506 | 0.290471 | 0.771798 | 0.872704 | -6.42656 |
| AC080129.2   | -0.23839 | 5.643988 | -0.28936 | 0.772643 | 0.873307 | -6.5349  |
| CYP51A1-AS1  | -0.16595 | 3.896087 | -0.2889  | 0.772995 | 0.873573 | -5.9652  |
| ADAMTSL4-AS1 | -0.08162 | 6.962633 | -0.28753 | 0.774048 | 0.874631 | -6.87402 |
| AC243654.3   | -0.15365 | 4.59933  | -0.2862  | 0.775065 | 0.875649 | -6.21397 |
| AC008514.1   | 0.354773 | 4.064718 | 0.285166 | 0.775852 | 0.876406 | -5.88266 |
| TRMT2B-AS1   | 0.276265 | 5.941058 | 0.284875 | 0.776075 | 0.876526 | -6.50905 |
| PLS1-AS1     | 0.537743 | 1.212875 | 0.284638 | 0.776256 | 0.876599 | -5.49346 |
| AP000785.1   | 0.538714 | -0.06944 | 0.284125 | 0.776649 | 0.876672 | -5.44244 |
| LINC02102    | 0.256129 | 1.821127 | 0.284281 | 0.776529 | 0.876672 | -5.55742 |
| RNF216-IT1   | -0.0646  | 7.544677 | -0.2841  | 0.776671 | 0.876672 | -6.98236 |
| AL360169.2   | 0.302898 | 3.754523 | 0.283629 | 0.777028 | 0.876812 | -5.851   |
| AL391335.1   | 0.080145 | 7.177735 | 0.283681 | 0.776989 | 0.876812 | -6.88709 |
| AC091435.2   | 0.500947 | -1.00454 | 0.282944 | 0.777552 | 0.876876 | -5.40627 |
| AL731568.1   | -0.46658 | 0.907664 | -0.28308 | 0.777447 | 0.876876 | -5.52369 |
| LINC01394    | -0.31933 | 3.285791 | -0.28325 | 0.777317 | 0.876876 | -5.88944 |
| AL133371.2   | 0.318891 | 5.5642   | 0.283079 | 0.777449 | 0.876876 | -6.31449 |
| LINC01290    | 0.109687 | 7.255987 | 0.282676 | 0.777757 | 0.876976 | -6.90555 |
| SMAD5-AS1    | -0.16149 | 3.81657  | -0.28211 | 0.778189 | 0.877331 | -5.97679 |
| AC009948.2   | 0.133456 | 5.708726 | 0.281201 | 0.778887 | 0.877986 | -6.49484 |
| AC012366.1   | 0.517578 | -0.90506 | 0.279794 | 0.779964 | 0.879068 | -5.40878 |
| AC007378.1   | 0.363183 | 2.981893 | 0.279231 | 0.780395 | 0.879422 | -5.67727 |
| AL512604.2   | 0.415362 | -0.32217 | 0.278554 | 0.780914 | 0.879744 | -5.43211 |
| AC024901.1   | 0.487181 | 0.44033  | 0.278655 | 0.780837 | 0.879744 | -5.45809 |

|             |          |          |          |          |          |          |
|-------------|----------|----------|----------|----------|----------|----------|
| AL158801.3  | 0.326151 | 4.350209 | 0.278107 | 0.781257 | 0.879997 | -6.0264  |
| COL18A1-AS2 | 0.451913 | 1.493002 | 0.277438 | 0.781769 | 0.880047 | -5.51719 |
| AC069366.2  | -0.39501 | 1.593188 | -0.27749 | 0.781732 | 0.880047 | -5.61316 |
| AC098479.1  | -0.41118 | 3.746355 | -0.27747 | 0.781746 | 0.880047 | -5.88645 |
| AC091060.1  | -0.07545 | 5.16877  | -0.27764 | 0.781618 | 0.880047 | -6.34196 |
| AL596087.2  | -0.47611 | -1.64982 | -0.27655 | 0.782452 | 0.880684 | -5.41295 |
| AL359541.1  | -0.255   | 3.961495 | -0.27578 | 0.78304  | 0.881214 | -5.94438 |
| LINC02398   | -0.50778 | -0.16048 | -0.27543 | 0.783309 | 0.881367 | -5.4687  |
| AL136984.1  | -0.12804 | 4.520481 | -0.2753  | 0.783411 | 0.881367 | -6.16191 |
| NDST1-AS1   | 0.449329 | 2.710131 | 0.274809 | 0.783785 | 0.881614 | -5.61584 |
| AL589765.5  | -0.38726 | 1.977533 | -0.2747  | 0.783865 | 0.881614 | -5.64741 |
| AC005696.4  | 0.128558 | 5.603944 | 0.274285 | 0.784188 | 0.881844 | -6.50003 |
| AC091488.1  | 0.358431 | 3.627767 | 0.273755 | 0.784594 | 0.881939 | -5.78949 |
| AC092653.1  | -0.06652 | 7.32435  | -0.27372 | 0.784624 | 0.881939 | -6.94698 |
| AC005332.5  | -0.0637  | 8.505734 | -0.27374 | 0.784604 | 0.881939 | -7.13743 |
| AP003467.1  | -0.17443 | 5.675428 | -0.27341 | 0.784856 | 0.882068 | -6.55793 |
| AKT3-IT1    | -0.35983 | 2.645467 | -0.27326 | 0.784976 | 0.882071 | -5.72809 |
| AC139792.2  | 0.405522 | 1.884415 | 0.27277  | 0.78535  | 0.882359 | -5.54817 |
| AC074183.2  | 0.265912 | 3.440446 | 0.27206  | 0.785895 | 0.882839 | -5.77743 |
| AC009145.1  | 0.485101 | -0.4766  | 0.271043 | 0.786675 | 0.883498 | -5.42437 |
| LINC01480   | -0.16002 | 5.130776 | -0.27099 | 0.786716 | 0.883498 | -6.37309 |
| AC010536.3  | -0.38028 | 1.84022  | -0.27024 | 0.787291 | 0.88401  | -5.61118 |
| AC097375.3  | 0.380566 | -2.04463 | 0.269318 | 0.788    | 0.884147 | -5.38307 |
| SLC9A9-AS1  | 0.472048 | -1.08195 | 0.269397 | 0.78794  | 0.884147 | -5.40852 |
| AL392023.1  | -0.45926 | -1.40664 | -0.26942 | 0.787919 | 0.884147 | -5.42247 |
| LINC01936   | -0.15021 | 3.765115 | -0.26954 | 0.787832 | 0.884147 | -5.9138  |
| AC026471.6  | 0.110199 | 4.995311 | 0.269404 | 0.787934 | 0.884147 | -6.24676 |
| AP002358.1  | 0.397829 | -1.60035 | 0.269038 | 0.788215 | 0.884256 | -5.39593 |
| AP006248.4  | -0.46422 | -1.28613 | -0.26847 | 0.788652 | 0.88435  | -5.42819 |
| AC114291.1  | -0.40263 | 1.135349 | -0.26847 | 0.78865  | 0.88435  | -5.55148 |
| AC004241.4  | -0.16101 | 3.876891 | -0.26873 | 0.78845  | 0.88435  | -5.9802  |
| AL160163.1  | 0.330822 | 3.901909 | 0.26823  | 0.788836 | 0.884424 | -5.8721  |
| AC005730.3  | -0.06107 | 7.300496 | -0.26757 | 0.789344 | 0.884862 | -6.92974 |
| AC115099.1  | 0.386796 | 4.116414 | 0.266665 | 0.790039 | 0.884993 | -5.89438 |
| BIRC6-AS1   | -0.2364  | 3.964705 | -0.26696 | 0.789813 | 0.884993 | -5.96949 |
| AC002401.3  | -0.33764 | 4.219449 | -0.26703 | 0.78976  | 0.884993 | -5.97169 |
| AL512791.2  | -0.09602 | 4.885584 | -0.26686 | 0.789889 | 0.884993 | -6.28368 |
| AL391244.1  | -0.20524 | 6.26777  | -0.26665 | 0.79005  | 0.884993 | -6.76683 |
| AC026471.1  | 0.060141 | 9.079814 | 0.266238 | 0.790368 | 0.885216 | -7.21489 |
| AC010999.1  | 0.303768 | 4.483904 | 0.265448 | 0.790975 | 0.885764 | -5.97108 |
| AC023024.2  | -0.09182 | 6.850364 | -0.26438 | 0.791798 | 0.886554 | -6.85165 |
| PLCG1-AS1   | 0.062398 | 5.490355 | 0.263604 | 0.792394 | 0.887089 | -6.43375 |
| FAM41C      | 0.365115 | -0.8813  | 0.263231 | 0.792681 | 0.887278 | -5.4198  |
| AC016700.3  | 0.460249 | -0.70892 | 0.262143 | 0.793518 | 0.888083 | -5.42215 |
| LINC02244   | 0.310444 | 5.25359  | 0.261982 | 0.793642 | 0.888089 | -6.17819 |
| AL390719.2  | -0.10702 | 10.11804 | -0.26151 | 0.794007 | 0.888366 | -7.37813 |
| AC025442.1  | 0.248599 | 4.451226 | 0.261113 | 0.794311 | 0.888573 | -5.99317 |
| AC019193.2  | 0.380093 | 1.957623 | 0.259277 | 0.795725 | 0.890023 | -5.54948 |
| AC008667.3  | 0.45986  | -0.98119 | 0.256976 | 0.797497 | 0.891051 | -5.4129  |
| AC020891.1  | 0.513646 | 0.307105 | 0.257115 | 0.79739  | 0.891051 | -5.45801 |
| AC108102.1  | 0.357107 | 2.154983 | 0.257217 | 0.797312 | 0.891051 | -5.5948  |
| CFAP44-AS1  | 0.27329  | 2.833699 | 0.257041 | 0.797448 | 0.891051 | -5.68205 |
| AC004593.1  | -0.31726 | 3.269086 | -0.2567  | 0.797711 | 0.891051 | -5.88013 |
| AF178030.1  | 0.316281 | 3.893661 | 0.257785 | 0.796874 | 0.891051 | -6.03399 |
| CRTC3-AS1   | 0.059293 | 5.928783 | 0.256777 | 0.797651 | 0.891051 | -6.56087 |
| AP001830.1  | 0.089421 | 6.89543  | 0.257762 | 0.796892 | 0.891051 | -6.81603 |
| AC009283.1  | -0.08257 | 9.808377 | -0.25693 | 0.797535 | 0.891051 | -7.33278 |
| MIR5689HG   | -0.39956 | 0.564889 | -0.25604 | 0.798219 | 0.891352 | -5.50661 |

|            |          |          |          |          |          |          |
|------------|----------|----------|----------|----------|----------|----------|
| TCEAL3-AS1 | -0.39684 | 1.537098 | -0.25607 | 0.798194 | 0.891352 | -5.57971 |
| Z98884.1   | 0.132191 | 6.3904   | 0.255674 | 0.798501 | 0.891429 | -6.65553 |
| AC010809.1 | -0.07254 | 7.664795 | -0.25564 | 0.798525 | 0.891429 | -7.01026 |
| AL158212.4 | 0.16679  | 3.853184 | 0.255033 | 0.798995 | 0.891822 | -5.89357 |
| LINC02313  | 0.333246 | 4.838462 | 0.254879 | 0.799114 | 0.891822 | -6.15278 |
| AC104187.1 | 0.24477  | 3.233601 | 0.254561 | 0.79936  | 0.891963 | -5.75915 |
| AC010931.2 | -0.19023 | 3.186311 | -0.25331 | 0.800322 | 0.892783 | -5.81563 |
| AC008026.3 | -0.06837 | 6.256364 | -0.25329 | 0.800338 | 0.892783 | -6.69366 |
| AC103769.1 | 0.115812 | 7.9494   | 0.253146 | 0.800451 | 0.892783 | -7.02264 |
| AL359962.2 | 0.1249   | 6.618694 | 0.252155 | 0.801215 | 0.893503 | -6.73676 |
| AC136475.9 | -0.37102 | 2.069706 | -0.25143 | 0.801776 | 0.893996 | -5.65546 |
| AL008636.1 | 0.393479 | -0.18319 | 0.251227 | 0.801932 | 0.894037 | -5.44323 |
| AP001893.3 | -0.41692 | -0.22926 | -0.25075 | 0.802301 | 0.894316 | -5.46866 |
| LINC00857  | 0.158379 | 8.326761 | 0.250292 | 0.802654 | 0.894576 | -7.08511 |
| AL022069.2 | -0.18989 | 3.10483  | -0.24987 | 0.802981 | 0.894675 | -5.78714 |
| RN7SL832P  | 0.076016 | 6.485606 | 0.250005 | 0.802875 | 0.894675 | -6.70298 |
| AC008805.2 | 0.437079 | -0.8763  | 0.249097 | 0.803576 | 0.895206 | -5.42017 |
| AL354811.1 | -0.3408  | 2.564525 | -0.24859 | 0.803966 | 0.895508 | -5.69467 |
| AC011461.1 | 0.09603  | 6.63893  | 0.248068 | 0.804371 | 0.895826 | -6.75322 |
| AC069547.1 | 0.058077 | 7.960474 | 0.247785 | 0.80459  | 0.895937 | -7.04817 |
| AC055764.2 | 0.111078 | 5.703782 | 0.247358 | 0.80492  | 0.896171 | -6.48079 |
| AC008147.2 | -0.07009 | 7.16377  | -0.24681 | 0.80534  | 0.896506 | -6.90249 |
| AL079343.1 | -0.35846 | -0.14916 | -0.24508 | 0.80668  | 0.897497 | -5.4721  |
| AC015722.2 | -0.42356 | 0.230637 | -0.24504 | 0.806708 | 0.897497 | -5.4927  |
| AC015920.1 | -0.21047 | 2.939327 | -0.2451  | 0.806665 | 0.897497 | -5.74738 |
| AC002094.5 | -0.08441 | 5.914922 | -0.24549 | 0.806359 | 0.897497 | -6.65751 |
| AC097468.2 | 0.439054 | -1.62171 | 0.244594 | 0.807056 | 0.897725 | -5.39646 |
| AC138811.1 | -0.10334 | 6.176549 | -0.24447 | 0.807152 | 0.897725 | -6.71126 |
| KCNMA1-AS3 | -0.3109  | 1.893856 | -0.2441  | 0.807435 | 0.897774 | -5.62952 |
| AL589765.6 | 0.352573 | 3.348441 | 0.244237 | 0.807332 | 0.897774 | -5.72341 |
| AC008264.2 | -0.07587 | 3.237677 | -0.24336 | 0.808009 | 0.897973 | -5.80776 |
| AC083801.2 | 0.274604 | 4.061574 | 0.242836 | 0.808415 | 0.897973 | -5.89987 |
| AC009754.1 | -0.18584 | 4.177637 | -0.24262 | 0.80858  | 0.897973 | -6.13262 |
| AC034102.8 | -0.20561 | 4.237483 | -0.24186 | 0.809168 | 0.897973 | -6.13622 |
| C15orf56   | -0.1486  | 5.064696 | -0.24213 | 0.808965 | 0.897973 | -6.3453  |
| AC090617.6 | -0.2642  | 5.06497  | -0.24242 | 0.80874  | 0.897973 | -6.4233  |
| AL139021.2 | 0.111508 | 5.578247 | 0.243295 | 0.80806  | 0.897973 | -6.45468 |
| AP001001.1 | -0.05623 | 6.410005 | -0.24249 | 0.80868  | 0.897973 | -6.74896 |
| GATA2-AS1  | -0.12977 | 6.792843 | -0.24191 | 0.80913  | 0.897973 | -6.87064 |
| ZNF426-DT  | -0.08324 | 6.968602 | -0.24208 | 0.808999 | 0.897973 | -6.90015 |
| AL442125.2 | -0.07403 | 7.353436 | -0.24371 | 0.807739 | 0.897973 | -6.95259 |
| AC068790.4 | -0.12785 | 7.301722 | -0.24224 | 0.808873 | 0.897973 | -6.95623 |
| AC007038.2 | -0.05034 | 8.268108 | -0.24259 | 0.808606 | 0.897973 | -7.10607 |
| AC006116.5 | 0.251602 | 4.106161 | 0.241298 | 0.809605 | 0.898325 | -5.94153 |
| AC015726.3 | 0.414671 | 0.892207 | 0.240852 | 0.80995  | 0.8985   | -5.48716 |
| AC007216.3 | -0.0473  | 7.378304 | -0.24079 | 0.810002 | 0.8985   | -6.9556  |
| SNHG25     | 0.086698 | 11.33238 | 0.2404   | 0.8103   | 0.898698 | -7.54205 |
| AC009097.3 | -0.36779 | -1.88784 | -0.2397  | 0.810845 | 0.89917  | -5.41174 |
| FGF12-AS2  | -0.36035 | 2.175638 | -0.23882 | 0.811521 | 0.899522 | -5.63398 |
| BACH1-AS1  | 0.056775 | 5.808855 | 0.238967 | 0.81141  | 0.899522 | -6.56155 |
| AC139100.2 | -0.0836  | 7.443958 | -0.23909 | 0.81131  | 0.899522 | -6.98367 |
| LINC02094  | -0.41591 | -1.63423 | -0.23652 | 0.813308 | 0.899776 | -5.41949 |
| AC011471.3 | -0.41435 | -1.09191 | -0.23695 | 0.812974 | 0.899776 | -5.43953 |
| ERLNC1     | 0.377911 | 0.404005 | 0.237648 | 0.812431 | 0.899776 | -5.47196 |
| AL157931.1 | 0.462903 | 0.762573 | 0.236838 | 0.813058 | 0.899776 | -5.48263 |
| AC020763.5 | -0.36483 | 1.238022 | -0.23782 | 0.812301 | 0.899776 | -5.55414 |
| LINC02076  | 0.198475 | 3.774058 | 0.237972 | 0.81218  | 0.899776 | -5.88526 |
| AC124069.1 | -0.18432 | 4.791983 | -0.23659 | 0.813253 | 0.899776 | -6.16512 |

|             |          |          |          |          |          |          |
|-------------|----------|----------|----------|----------|----------|----------|
| AC091729.2  | -0.18192 | 5.117186 | -0.23673 | 0.813145 | 0.899776 | -6.39972 |
| TSPEAR-AS1  | 0.168983 | 5.872715 | 0.236872 | 0.813031 | 0.899776 | -6.55014 |
| AC103810.2  | 0.081203 | 6.002234 | 0.237242 | 0.812745 | 0.899776 | -6.59182 |
| AC090616.6  | -0.04154 | 6.310323 | -0.23776 | 0.812348 | 0.899776 | -6.72062 |
| AC007566.1  | -0.07054 | 7.892994 | -0.23758 | 0.812484 | 0.899776 | -7.0588  |
| HM13-IT1    | 0.047354 | 9.629778 | 0.236649 | 0.813205 | 0.899776 | -7.30486 |
| AC103691.2  | 0.350839 | 1.625024 | 0.236156 | 0.813586 | 0.89982  | -5.54604 |
| AL022069.1  | 0.116666 | 4.483677 | 0.236271 | 0.813497 | 0.89982  | -6.02613 |
| AL513188.1  | 0.313008 | 2.963556 | 0.234988 | 0.814491 | 0.900688 | -5.6856  |
| AC000123.1  | 0.052984 | 8.652147 | 0.234569 | 0.814816 | 0.900914 | -7.15926 |
| AL133255.1  | -0.3417  | 2.225006 | -0.23392 | 0.815323 | 0.901342 | -5.66496 |
| AC021188.1  | -0.11574 | 5.249661 | -0.23334 | 0.815769 | 0.901703 | -6.37211 |
| AC118758.3  | 0.076529 | 2.160267 | 0.232381 | 0.816512 | 0.901745 | -5.62195 |
| AC025165.1  | 0.163617 | 4.227216 | 0.232941 | 0.816078 | 0.901745 | -5.98453 |
| AC008555.2  | -0.08116 | 4.157077 | -0.23301 | 0.816028 | 0.901745 | -6.07476 |
| AC106886.4  | -0.04439 | 5.273397 | -0.23258 | 0.816359 | 0.901745 | -6.39383 |
| AC027544.2  | 0.062447 | 5.83422  | 0.232303 | 0.816573 | 0.901745 | -6.54453 |
| AC079336.6  | -0.07396 | 5.696538 | -0.23221 | 0.816648 | 0.901745 | -6.55203 |
| AC124045.1  | -0.06035 | 7.73299  | -0.23264 | 0.81631  | 0.901745 | -7.03    |
| AL445123.1  | -0.41584 | -0.0365  | -0.2313  | 0.81735  | 0.901797 | -5.48512 |
| AC004702.1  | 0.432553 | 1.211477 | 0.231803 | 0.816961 | 0.901797 | -5.5114  |
| C1orf229    | -0.09298 | 4.628893 | -0.23127 | 0.817373 | 0.901797 | -6.24518 |
| AC011468.5  | -0.05934 | 6.834128 | -0.23153 | 0.81717  | 0.901797 | -6.85365 |
| LINC02449   | -0.08668 | 6.861937 | -0.23122 | 0.817415 | 0.901797 | -6.87123 |
| AL359962.1  | -0.07822 | 7.835027 | -0.23187 | 0.81691  | 0.901797 | -7.03309 |
| AC009320.1  | -0.3713  | 2.499968 | -0.23093 | 0.817637 | 0.901909 | -5.68095 |
| AC009686.1  | -0.14263 | 6.201534 | -0.2306  | 0.817891 | 0.902057 | -6.72561 |
| AP001350.1  | 0.047622 | 6.438806 | 0.230279 | 0.818142 | 0.902187 | -6.73014 |
| AC008966.2  | -0.10121 | 7.015107 | -0.23014 | 0.818249 | 0.902187 | -6.89585 |
| LINC00449   | -0.09358 | 5.849815 | -0.22971 | 0.818587 | 0.902428 | -6.56485 |
| AL031280.1  | 0.234528 | 1.861284 | 0.228646 | 0.81941  | 0.902954 | -5.56674 |
| AC002480.1  | 0.208635 | 3.088683 | 0.228471 | 0.819545 | 0.902954 | -5.7373  |
| AL691403.2  | 0.265081 | 3.489348 | 0.228565 | 0.819472 | 0.902954 | -5.81602 |
| AC093423.2  | -0.21158 | 4.592339 | -0.22879 | 0.819296 | 0.902954 | -6.17302 |
| CACNA1C-AS4 | 0.379427 | -0.78279 | 0.228138 | 0.819804 | 0.903106 | -5.42757 |
| AL136304.1  | -0.05832 | 7.065942 | -0.22795 | 0.819947 | 0.903131 | -6.90249 |
| AL031719.2  | 0.056926 | 7.775342 | 0.227675 | 0.820163 | 0.903238 | -7.0116  |
| AP003969.2  | -0.25688 | 2.22929  | -0.22715 | 0.820574 | 0.903558 | -5.64203 |
| AL359317.1  | -0.09957 | 5.10063  | -0.22699 | 0.820696 | 0.903559 | -6.36478 |
| AC100797.1  | 0.266853 | 4.956369 | 0.226813 | 0.820833 | 0.903574 | -6.22903 |
| AL138966.2  | 0.158032 | 5.392021 | 0.226662 | 0.82095  | 0.903574 | -6.37821 |
| AC015660.3  | 0.31474  | 2.676545 | 0.226473 | 0.821097 | 0.903603 | -5.65704 |
| AC131649.1  | -0.35826 | -1.0844  | -0.22483 | 0.82237  | 0.904156 | -5.44038 |
| AL354919.1  | 0.235629 | 1.364749 | 0.224891 | 0.822325 | 0.904156 | -5.53172 |
| AC131391.1  | 0.334808 | 1.698472 | 0.224741 | 0.822441 | 0.904156 | -5.54202 |
| AL158071.3  | 0.193143 | 5.311229 | 0.224769 | 0.82242  | 0.904156 | -6.24345 |
| AC245452.1  | -0.03565 | 5.109321 | -0.22537 | 0.82195  | 0.904156 | -6.35046 |
| AC092794.2  | -0.12645 | 5.160742 | -0.22537 | 0.821951 | 0.904156 | -6.42964 |
| AL358115.1  | -0.04843 | 6.701588 | -0.22503 | 0.822216 | 0.904156 | -6.81797 |
| ABHD15-AS1  | 0.374506 | 2.459502 | 0.224394 | 0.822711 | 0.904211 | -5.62751 |
| AL132656.4  | 0.071213 | 6.926202 | 0.224367 | 0.822732 | 0.904211 | -6.84546 |
| AC068987.1  | -0.36538 | 1.377992 | -0.22409 | 0.822945 | 0.904313 | -5.56006 |
| AC027449.1  | -0.38205 | 1.543873 | -0.22383 | 0.823151 | 0.904318 | -5.58747 |
| AL162390.1  | -0.05287 | 6.613093 | -0.22366 | 0.823278 | 0.904318 | -6.80403 |
| AC112484.4  | 0.072122 | 6.838186 | 0.223622 | 0.823311 | 0.904318 | -6.84172 |
| AC116348.2  | 0.316172 | 3.222463 | 0.22338  | 0.823499 | 0.904392 | -5.73059 |
| RBM15-AS1   | -0.08163 | 5.030751 | -0.22319 | 0.823644 | 0.904419 | -6.28753 |
| AL357568.2  | -0.26701 | 1.224182 | -0.22284 | 0.823917 | 0.904586 | -5.55065 |

|             |          |          |          |          |          |          |
|-------------|----------|----------|----------|----------|----------|----------|
| AP001189.6  | -0.35322 | -2.06231 | -0.22263 | 0.824079 | 0.904632 | -5.40913 |
| AL357054.2  | -0.31674 | 2.097206 | -0.22176 | 0.824756 | 0.905244 | -5.66904 |
| AL158211.4  | -0.29272 | 2.02015  | -0.22103 | 0.825327 | 0.905652 | -5.63696 |
| AC020978.9  | -0.04534 | 7.057029 | -0.22097 | 0.825369 | 0.905652 | -6.90763 |
| PTPRJ-AS1   | 0.144387 | 6.779133 | 0.220675 | 0.825601 | 0.905775 | -6.70475 |
| AC007292.2  | 0.04775  | 6.655406 | 0.220518 | 0.825723 | 0.905776 | -6.80582 |
| AC027338.1  | -0.30859 | 1.701372 | -0.21927 | 0.826694 | 0.906709 | -5.59633 |
| AC011466.1  | 0.201846 | 4.353218 | 0.21909  | 0.826834 | 0.906729 | -5.97745 |
| Z99756.1    | -0.29485 | -0.89105 | -0.21879 | 0.827064 | 0.90685  | -5.44934 |
| AL365271.1  | 0.395516 | -0.60539 | 0.217414 | 0.828137 | 0.907297 | -5.43696 |
| AC008567.2  | -0.33801 | 0.111676 | -0.21725 | 0.828267 | 0.907297 | -5.48825 |
| AC092839.1  | -0.33008 | 0.941597 | -0.21736 | 0.828183 | 0.907297 | -5.53668 |
| AC093330.2  | -0.18112 | 1.209419 | -0.21751 | 0.828065 | 0.907297 | -5.54826 |
| AC009955.4  | 0.356756 | 2.164879 | 0.217941 | 0.827728 | 0.907297 | -5.5789  |
| AC114760.2  | -0.0671  | 6.242116 | -0.21718 | 0.828317 | 0.907297 | -6.70557 |
| AC093110.1  | -0.07787 | 8.491661 | -0.21786 | 0.827791 | 0.907297 | -7.15143 |
| AC013457.1  | 0.397365 | -0.82009 | 0.216659 | 0.828725 | 0.907478 | -5.42658 |
| AL121829.2  | -0.31627 | 2.819932 | -0.21673 | 0.828668 | 0.907478 | -5.76412 |
| AL133415.1  | -0.08657 | 7.32602  | -0.21636 | 0.828959 | 0.907602 | -6.96454 |
| AL358933.1  | -0.2366  | 0.60269  | -0.2153  | 0.829786 | 0.907625 | -5.51026 |
| AL049712.1  | -0.2765  | 1.818219 | -0.21516 | 0.829891 | 0.907625 | -5.61439 |
| WVOX-AS1    | 0.302888 | 2.812036 | 0.215518 | 0.829613 | 0.907625 | -5.6627  |
| AL008729.2  | 0.270001 | 2.822745 | 0.214935 | 0.830067 | 0.907625 | -5.68052 |
| LINC02005   | -0.35265 | 2.555029 | -0.21586 | 0.829344 | 0.907625 | -5.71046 |
| AC020659.2  | 0.224861 | 3.054485 | 0.215145 | 0.829903 | 0.907625 | -5.71983 |
| AC011753.2  | 0.1512   | 5.089311 | 0.215482 | 0.829641 | 0.907625 | -6.27847 |
| AC055855.1  | -0.04799 | 6.932741 | -0.21507 | 0.829962 | 0.907625 | -6.8726  |
| AC009948.3  | -0.10185 | 6.961017 | -0.21542 | 0.829689 | 0.907625 | -6.88413 |
| AC117489.1  | 0.195417 | 3.14278  | 0.213591 | 0.831113 | 0.908637 | -5.90224 |
| AC007272.1  | -0.07379 | 5.947948 | -0.21317 | 0.83144  | 0.908862 | -6.58503 |
| LINC00456   | 0.381835 | 0.179327 | 0.21286  | 0.831682 | 0.908995 | -5.46511 |
| AL592546.1  | 0.156654 | 5.667286 | 0.211952 | 0.832389 | 0.909503 | -6.42203 |
| AC005841.1  | -0.10217 | 7.08503  | -0.21201 | 0.832347 | 0.909503 | -6.91529 |
| AC061975.6  | -0.34646 | -1.94342 | -0.21107 | 0.833076 | 0.909685 | -5.41278 |
| AC068726.1  | 0.382644 | -0.43064 | 0.211215 | 0.832964 | 0.909685 | -5.4421  |
| AC004994.1  | -0.38742 | -1.13021 | -0.21049 | 0.833525 | 0.909685 | -5.44344 |
| AL513548.3  | 0.180944 | 0.921455 | 0.210686 | 0.833376 | 0.909685 | -5.51067 |
| AC096719.1  | -0.16845 | 3.274482 | -0.21056 | 0.833478 | 0.909685 | -5.79468 |
| AC060766.6  | 0.276871 | 4.809792 | 0.21123  | 0.832953 | 0.909685 | -5.97885 |
| AL662791.1  | 0.185033 | 6.340866 | 0.211526 | 0.832721 | 0.909685 | -6.67435 |
| AC073283.1  | -0.13921 | 6.427182 | -0.21054 | 0.833492 | 0.909685 | -6.76223 |
| AC107031.1  | 0.395405 | -1.0582  | 0.209921 | 0.833973 | 0.909916 | -5.42273 |
| Z82186.1    | -0.26162 | -0.55984 | -0.20991 | 0.833979 | 0.909916 | -5.45857 |
| Z99916.3    | 0.351119 | -1.92058 | 0.207011 | 0.836241 | 0.911423 | -5.39815 |
| AP003497.2  | -0.33923 | -1.45741 | -0.20704 | 0.836219 | 0.911423 | -5.42863 |
| AC103996.2  | 0.341512 | 0.358917 | 0.207043 | 0.836216 | 0.911423 | -5.47491 |
| AC010401.1  | 0.089838 | 2.887516 | 0.207261 | 0.836046 | 0.911423 | -5.72548 |
| AC005014.3  | -0.25666 | 4.071537 | -0.20734 | 0.835981 | 0.911423 | -6.14998 |
| LINC01852   | 0.061548 | 5.5514   | 0.207789 | 0.835634 | 0.911423 | -6.46202 |
| AL035681.1  | -0.05497 | 6.893417 | -0.2069  | 0.836331 | 0.911423 | -6.86576 |
| MID1IP1-AS1 | -0.06092 | 8.209087 | -0.2073  | 0.836016 | 0.911423 | -7.10441 |
| AC016292.1  | -0.36093 | 2.364172 | -0.20645 | 0.836677 | 0.911537 | -5.67074 |
| AP005131.7  | -0.20766 | 4.263994 | -0.2065  | 0.836639 | 0.911537 | -6.05521 |
| AC012150.2  | 0.329239 | 1.480141 | 0.206212 | 0.836863 | 0.911607 | -5.53636 |
| AL049646.1  | 0.199895 | 1.823175 | 0.205359 | 0.837529 | 0.912062 | -5.58646 |
| AC091167.5  | 0.234696 | 4.006375 | 0.205183 | 0.837666 | 0.912062 | -5.93069 |
| AC020907.4  | -0.09039 | 7.32967  | -0.20505 | 0.837766 | 0.912062 | -6.95839 |
| AC021078.1  | -0.04477 | 9.932352 | -0.20549 | 0.837427 | 0.912062 | -7.36957 |

|            |          |          |          |          |          |          |
|------------|----------|----------|----------|----------|----------|----------|
| ITPRIP-AS1 | -0.08468 | 6.320695 | -0.20409 | 0.838521 | 0.912751 | -6.77129 |
| AC009044.1 | 0.253004 | 1.168256 | 0.203236 | 0.839186 | 0.913342 | -5.52237 |
| LINC00605  | 0.217087 | 4.419792 | 0.202891 | 0.839454 | 0.913502 | -6.05578 |
| AL645504.1 | -0.06828 | 5.377095 | -0.2022  | 0.839993 | 0.913957 | -6.43919 |
| AC036108.1 | -0.19134 | 4.531343 | -0.20174 | 0.840353 | 0.914215 | -6.07406 |
| AP001318.2 | -0.04836 | 9.224502 | -0.20101 | 0.840924 | 0.914704 | -7.2661  |
| AC137579.1 | -0.32693 | -1.94844 | -0.20043 | 0.841373 | 0.914795 | -5.41704 |
| AC006157.1 | 0.385793 | 1.416664 | 0.200668 | 0.84119  | 0.914795 | -5.52956 |
| AP001922.5 | 0.192052 | 4.162218 | 0.20044  | 0.841368 | 0.914795 | -5.98146 |
| LINC02556  | 0.348729 | 0.359815 | 0.199788 | 0.841877 | 0.915078 | -5.47683 |
| AL442647.1 | -0.34716 | 0.421126 | -0.19986 | 0.841821 | 0.915078 | -5.50921 |
| AL021391.1 | 0.292316 | 2.922007 | 0.198918 | 0.842556 | 0.915684 | -5.6812  |
| AC092718.5 | 0.097223 | 5.588484 | 0.19788  | 0.843367 | 0.916433 | -6.47076 |
| LINC00608  | 0.237103 | -1.39616 | 0.196772 | 0.844233 | 0.916559 | -5.41778 |
| AC084819.1 | -0.37388 | -0.50322 | -0.19676 | 0.844245 | 0.916559 | -5.46971 |
| AL591212.1 | -0.26338 | 1.666668 | -0.19749 | 0.843672 | 0.916559 | -5.61925 |
| AC015923.1 | 0.211217 | 3.960871 | 0.197135 | 0.843949 | 0.916559 | -5.88091 |
| AC005225.1 | -0.11969 | 4.585811 | -0.19664 | 0.844337 | 0.916559 | -6.19208 |
| AC008764.6 | -0.03634 | 6.449173 | -0.19687 | 0.844156 | 0.916559 | -6.75185 |
| AC040934.1 | 0.059662 | 6.598231 | 0.196824 | 0.844193 | 0.916559 | -6.77423 |
| AC093019.2 | 0.310003 | 1.975132 | 0.196455 | 0.844481 | 0.916566 | -5.58182 |
| Z82188.2   | 0.253555 | 2.649896 | 0.196231 | 0.844656 | 0.916566 | -5.66141 |
| AC018413.1 | -0.09109 | 6.736604 | -0.19616 | 0.844709 | 0.916566 | -6.83747 |
| AC116351.1 | -0.1239  | 3.78141  | -0.19578 | 0.845009 | 0.916759 | -5.94324 |
| AC006017.1 | 0.081241 | 6.40251  | 0.195258 | 0.845416 | 0.917068 | -6.71386 |
| AC051619.6 | 0.321179 | -0.98641 | 0.19436  | 0.846118 | 0.917167 | -5.43022 |
| AC093510.2 | -0.22914 | 1.983566 | -0.1949  | 0.8457   | 0.917167 | -5.71232 |
| AC016717.2 | -0.18984 | 2.824843 | -0.19443 | 0.846067 | 0.917167 | -5.76913 |
| AC022113.1 | -0.11526 | 3.613105 | -0.19446 | 0.846043 | 0.917167 | -5.91648 |
| AC008982.2 | 0.04746  | 8.365213 | 0.194665 | 0.84588  | 0.917167 | -7.11747 |
| AC105020.3 | 0.322073 | -1.01822 | 0.193798 | 0.846558 | 0.91731  | -5.42815 |
| AL355472.3 | -0.19698 | 5.38395  | -0.19393 | 0.846456 | 0.91731  | -6.45352 |
| AC097534.1 | -0.10139 | 6.085485 | -0.19372 | 0.846616 | 0.91731  | -6.67023 |
| AL162151.1 | 0.335288 | -1.74995 | 0.193422 | 0.846851 | 0.917433 | -5.40669 |
| AL031716.1 | 0.081845 | 6.872243 | 0.193233 | 0.846999 | 0.917461 | -6.84898 |
| LINC00582  | -0.26387 | 2.631046 | -0.19292 | 0.847245 | 0.917462 | -5.72068 |
| AC087481.3 | -0.03081 | 9.423409 | -0.19295 | 0.847217 | 0.917462 | -7.29217 |
| AL353597.3 | -0.25818 | -1.30258 | -0.19262 | 0.847482 | 0.917548 | -5.43515 |
| AL118511.2 | -0.36138 | -0.80942 | -0.19234 | 0.847701 | 0.917548 | -5.45899 |
| AL031289.1 | 0.252142 | 3.292939 | 0.192423 | 0.847633 | 0.917548 | -5.74371 |
| AL512598.1 | -0.20918 | 5.908175 | -0.19219 | 0.847813 | 0.917548 | -6.52464 |
| AC024651.1 | -0.27994 | -1.7342  | -0.18905 | 0.850271 | 0.918093 | -5.42306 |
| AC015911.6 | 0.32664  | -0.73974 | 0.189873 | 0.849628 | 0.918093 | -5.43694 |
| AP001257.1 | 0.34158  | -0.21857 | 0.190205 | 0.849368 | 0.918093 | -5.45487 |
| AC146944.4 | 0.328163 | -0.20172 | 0.190785 | 0.848914 | 0.918093 | -5.45548 |
| AL031595.1 | 0.177628 | 1.062279 | 0.189923 | 0.849589 | 0.918093 | -5.52399 |
| AC016229.2 | -0.32035 | 1.292197 | -0.18929 | 0.850085 | 0.918093 | -5.55633 |
| AC010273.2 | 0.348292 | 2.726466 | 0.189117 | 0.850219 | 0.918093 | -5.63717 |
| AP000662.1 | -0.15995 | 3.212227 | -0.18983 | 0.84966  | 0.918093 | -5.8128  |
| AC005256.1 | 0.335284 | 4.684119 | 0.190119 | 0.849435 | 0.918093 | -6.05479 |
| AC022079.2 | 0.144574 | 5.605953 | 0.189271 | 0.850098 | 0.918093 | -6.35819 |
| AC019226.1 | -0.04502 | 6.31027  | -0.1899  | 0.849603 | 0.918093 | -6.73091 |
| AC092301.1 | -0.03877 | 7.339914 | -0.18936 | 0.850025 | 0.918093 | -6.95814 |
| AP001628.1 | 0.072217 | 7.366418 | 0.189197 | 0.850156 | 0.918093 | -6.96452 |
| ZBTB40-IT1 | -0.05265 | 7.302227 | -0.18991 | 0.849601 | 0.918093 | -6.96853 |
| AL031717.1 | 0.040096 | 8.301207 | 0.189438 | 0.849968 | 0.918093 | -7.11261 |
| AC005884.2 | -0.06231 | 8.794656 | -0.18968 | 0.849778 | 0.918093 | -7.20662 |
| RSF1-IT1   | 0.140527 | 4.324591 | 0.18822  | 0.850921 | 0.918662 | -6.05058 |



|             |          |          |          |          |          |          |
|-------------|----------|----------|----------|----------|----------|----------|
| AL161729.1  | -0.0627  | 5.978661 | -0.18758 | 0.851425 | 0.919074 | -6.65107 |
| AC093484.2  | 0.242104 | 0.156808 | 0.187263 | 0.85167  | 0.919206 | -5.47338 |
| FBXW7-AS1   | -0.19476 | 3.933047 | -0.18617 | 0.852527 | 0.92     | -5.99758 |
| AL031599.1  | 0.298598 | -0.34356 | 0.185498 | 0.853052 | 0.920304 | -5.45273 |
| AP002847.1  | -0.14701 | 3.994875 | -0.1855  | 0.853054 | 0.920304 | -6.0081  |
| LINC01764   | -0.29528 | 0.34802  | -0.18413 | 0.854126 | 0.921235 | -5.50482 |
| AC008443.5  | -0.06066 | 7.478675 | -0.18408 | 0.854162 | 0.921235 | -6.98555 |
| AC092747.4  | 0.044774 | 10.16249 | 0.18373  | 0.854437 | 0.921399 | -7.39532 |
| LINC02132   | 0.309806 | -0.85678 | 0.183256 | 0.854808 | 0.921402 | -5.43551 |
| AL121748.1  | -0.1392  | 4.483734 | -0.18329 | 0.854779 | 0.921402 | -6.16893 |
| AC010680.2  | -0.07191 | 5.870201 | -0.18351 | 0.854609 | 0.921402 | -6.58462 |
| AC068305.2  | 0.143762 | 5.740523 | 0.182557 | 0.855356 | 0.92186  | -6.49512 |
| AC022893.3  | -0.22434 | 3.248691 | -0.18219 | 0.85564  | 0.922034 | -5.83965 |
| LINC00112   | -0.31037 | -1.68448 | -0.18172 | 0.856014 | 0.922123 | -5.42618 |
| LINC02351   | -0.34798 | -1.146   | -0.18156 | 0.856139 | 0.922123 | -5.44364 |
| AL358216.1  | 0.209247 | 1.368101 | 0.181873 | 0.855891 | 0.922123 | -5.54702 |
| AC008555.1  | -0.10245 | 5.042446 | -0.18146 | 0.856213 | 0.922123 | -6.37251 |
| AC106053.1  | -0.28077 | 1.408115 | -0.18051 | 0.856962 | 0.922769 | -5.57573 |
| AL031709.1  | -0.06827 | 6.199839 | -0.18038 | 0.857059 | 0.922769 | -6.71585 |
| LINC01123   | 0.066361 | 6.777974 | 0.179814 | 0.857505 | 0.923118 | -6.79211 |
| AC007347.1  | -0.0709  | 6.769291 | -0.17956 | 0.857702 | 0.923197 | -6.85392 |
| BRWD1-AS1   | 0.231785 | 2.183336 | 0.17737  | 0.859422 | 0.924916 | -5.62418 |
| AL021937.3  | -0.31931 | -0.27361 | -0.17691 | 0.859782 | 0.925104 | -5.47663 |
| SPON1-AS1   | -0.23401 | 3.895335 | -0.17677 | 0.859894 | 0.925104 | -5.96582 |
| AL049795.1  | 0.044454 | 5.748047 | 0.176676 | 0.859966 | 0.925104 | -6.51849 |
| AL158211.1  | 0.159628 | 4.239667 | 0.176267 | 0.860287 | 0.925316 | -6.03735 |
| FO393415.1  | 0.215367 | 0.953245 | 0.175888 | 0.860584 | 0.925504 | -5.51387 |
| AL117381.1  | -0.11411 | 6.896707 | -0.17546 | 0.860917 | 0.925729 | -6.88591 |
| AC226118.1  | -0.17903 | 4.630888 | -0.17515 | 0.861162 | 0.925805 | -6.1659  |
| AP003119.3  | 0.070027 | 7.726956 | 0.175059 | 0.861234 | 0.925805 | -7.01943 |
| AC079921.2  | -0.07778 | 7.226448 | -0.17428 | 0.861848 | 0.926333 | -6.95044 |
| AP001160.4  | 0.043103 | 7.052428 | 0.174076 | 0.862006 | 0.926369 | -6.87215 |
| AC099506.1  | 0.20821  | 0.789788 | 0.173318 | 0.862601 | 0.926744 | -5.50649 |
| AL353608.4  | 0.164019 | 3.744972 | 0.173361 | 0.862567 | 0.926744 | -5.88606 |
| AL109924.2  | 0.265426 | 1.705838 | 0.172955 | 0.862886 | 0.926917 | -5.55509 |
| BAALC-AS2   | 0.273893 | 2.424816 | 0.172154 | 0.863514 | 0.927327 | -5.63767 |
| AL139384.2  | -0.07901 | 4.82439  | -0.17219 | 0.863487 | 0.927327 | -6.2281  |
| AC008635.1  | 0.06948  | 5.965939 | 0.171785 | 0.863804 | 0.927506 | -6.61086 |
| AC107398.3  | 0.13872  | 1.720345 | 0.171024 | 0.864401 | 0.928014 | -5.57255 |
| LINC01634   | -0.20492 | 0.797837 | -0.17067 | 0.86468  | 0.928138 | -5.52943 |
| LINC01106   | -0.05626 | 7.248418 | -0.17056 | 0.864763 | 0.928138 | -6.93693 |
| AC079858.1  | 0.318481 | 0.205938 | 0.169885 | 0.865296 | 0.928187 | -5.47661 |
| AC067931.2  | 0.162988 | 2.948923 | 0.169561 | 0.86555  | 0.928187 | -5.73542 |
| AP000941.1  | -0.08484 | 5.001089 | -0.1702  | 0.865046 | 0.928187 | -6.23917 |
| AC019080.5  | 0.055388 | 7.085331 | 0.169738 | 0.865411 | 0.928187 | -6.88135 |
| ZNF32-AS1   | -0.04546 | 6.904943 | -0.16971 | 0.865437 | 0.928187 | -6.88521 |
| AC067852.4  | 0.041682 | 7.472676 | 0.169588 | 0.865529 | 0.928187 | -6.97519 |
| AC244093.3  | -0.12606 | 5.00421  | -0.16883 | 0.866122 | 0.928667 | -6.29471 |
| AC084855.1  | 0.290887 | -1.03082 | 0.168417 | 0.866449 | 0.928886 | -5.43674 |
| SLCO4A1-AS1 | -0.11471 | 7.68448  | -0.16793 | 0.866828 | 0.92916  | -7.03796 |
| AC020658.7  | 0.21541  | 0.26028  | 0.1675   | 0.867169 | 0.929393 | -5.48104 |
| AL050320.1  | -0.23538 | 2.423267 | -0.16712 | 0.86747  | 0.929518 | -5.68164 |
| LINC01871   | -0.11724 | 8.880078 | -0.16704 | 0.867534 | 0.929518 | -7.21495 |
| LINC01099   | -0.25389 | -2.34972 | -0.16664 | 0.867846 | 0.929587 | -5.40781 |
| AC022960.1  | -0.12756 | 5.089967 | -0.16671 | 0.867791 | 0.929587 | -6.35691 |
| SHANK2-AS1  | 0.147947 | 3.993919 | 0.166207 | 0.868185 | 0.92978  | -5.91628 |
| AC090519.2  | -0.05895 | 5.777123 | -0.16609 | 0.868273 | 0.92978  | -6.56025 |
| AP001972.4  | 0.289004 | -1.13962 | 0.164214 | 0.869751 | 0.930222 | -5.42819 |

|             |          |          |          |          |          |          |
|-------------|----------|----------|----------|----------|----------|----------|
| PTENP1-AS   | 0.302471 | -0.29086 | 0.164693 | 0.869375 | 0.930222 | -5.46103 |
| LINC02300   | 0.312482 | 0.079279 | 0.164823 | 0.869273 | 0.930222 | -5.47407 |
| AC126768.1  | 0.332972 | 2.043506 | 0.165109 | 0.869048 | 0.930222 | -5.59711 |
| AP001099.1  | 0.218648 | 3.669042 | 0.163364 | 0.870419 | 0.930222 | -5.80975 |
| AL139241.1  | 0.157623 | 3.594014 | 0.163876 | 0.870016 | 0.930222 | -5.89129 |
| AC009084.2  | -0.05543 | 5.489516 | -0.16377 | 0.870099 | 0.930222 | -6.49889 |
| AC005306.1  | 0.041401 | 5.877568 | 0.164102 | 0.869839 | 0.930222 | -6.56713 |
| AL135791.1  | -0.06462 | 5.871021 | -0.16403 | 0.869898 | 0.930222 | -6.61856 |
| AC119396.2  | 0.094171 | 6.773468 | 0.165249 | 0.868938 | 0.930222 | -6.82192 |
| AC008760.2  | 0.114343 | 6.785169 | 0.163537 | 0.870283 | 0.930222 | -6.83333 |
| AL606760.1  | -0.04776 | 6.822488 | -0.16416 | 0.86979  | 0.930222 | -6.84794 |
| AC010260.1  | -0.0481  | 7.00081  | -0.164   | 0.869919 | 0.930222 | -6.90095 |
| AC015849.3  | -0.0327  | 9.763025 | -0.16338 | 0.870405 | 0.930222 | -7.34722 |
| AC092818.1  | 0.284267 | 0.787398 | 0.163029 | 0.870683 | 0.930371 | -5.50396 |
| AC008708.2  | 0.272367 | -1.60195 | 0.162716 | 0.870929 | 0.930502 | -5.41649 |
| LINC00273   | -0.23287 | 0.398189 | -0.16248 | 0.871118 | 0.930572 | -5.50598 |
| AC079203.2  | -0.22844 | 2.985776 | -0.16176 | 0.871684 | 0.930776 | -5.79387 |
| AL512329.2  | -0.20294 | 4.329635 | -0.16192 | 0.871552 | 0.930776 | -6.12029 |
| AC020594.1  | -0.16872 | 5.043694 | -0.1616  | 0.871805 | 0.930776 | -6.27722 |
| GEMIN7-AS1  | 0.034597 | 7.221365 | 0.161771 | 0.871672 | 0.930776 | -6.92715 |
| GPC6-AS2    | -0.28211 | -1.47529 | -0.16056 | 0.872626 | 0.931119 | -5.43384 |
| LINC02387   | -0.2238  | 2.877915 | -0.16048 | 0.872689 | 0.931119 | -5.72331 |
| AP000974.1  | 0.0551   | 4.586612 | 0.160663 | 0.872543 | 0.931119 | -6.10807 |
| AC005532.1  | 0.120026 | 5.396283 | 0.160555 | 0.872628 | 0.931119 | -6.48221 |
| AC145285.2  | -0.03486 | 6.815559 | -0.16041 | 0.872746 | 0.931119 | -6.84526 |
| LINC02526   | 0.291032 | -1.53416 | 0.1598   | 0.873222 | 0.931123 | -5.41655 |
| NBAT1       | 0.207082 | 0.773561 | 0.159774 | 0.873242 | 0.931123 | -5.5074  |
| LINC00517   | 0.158646 | 0.80006  | 0.159951 | 0.873103 | 0.931123 | -5.51019 |
| AC018511.1  | 0.202355 | 3.036413 | 0.15977  | 0.873246 | 0.931123 | -5.74326 |
| AC090198.1  | -0.02829 | 8.476229 | -0.15936 | 0.873568 | 0.931335 | -7.15624 |
| AC078789.1  | 0.28059  | -1.61861 | 0.158517 | 0.874231 | 0.931909 | -5.41448 |
| AC008050.1  | -0.1949  | 3.040185 | -0.15774 | 0.87484  | 0.931969 | -5.8062  |
| AC008467.1  | -0.05407 | 3.759506 | -0.15784 | 0.874766 | 0.931969 | -5.9344  |
| AC097381.1  | -0.089   | 3.638173 | -0.15797 | 0.874661 | 0.931969 | -5.94977 |
| AC123768.2  | 0.054185 | 5.731737 | 0.158182 | 0.874495 | 0.931969 | -6.54864 |
| AC008937.2  | -0.04177 | 6.323403 | -0.15748 | 0.875049 | 0.931969 | -6.72672 |
| AC106739.1  | -0.05439 | 7.347861 | -0.15734 | 0.875156 | 0.931969 | -6.97607 |
| AP005482.3  | 0.039337 | 8.412281 | 0.157632 | 0.874928 | 0.931969 | -7.13654 |
| AC018529.1  | 0.063743 | 6.152335 | 0.157053 | 0.875383 | 0.93208  | -6.66973 |
| AC008871.1  | 0.275997 | -0.59336 | 0.156354 | 0.875934 | 0.932533 | -5.44953 |
| ZDHHC20-IT1 | 0.040015 | 7.167498 | 0.156156 | 0.876089 | 0.932567 | -6.91751 |
| AC008250.1  | 0.270348 | -1.69554 | 0.154086 | 0.877718 | 0.932717 | -5.41485 |
| ZFY-AS1     | -0.26897 | 0.14701  | -0.15435 | 0.877508 | 0.932717 | -5.49979 |
| AL121821.1  | -0.27159 | 0.257335 | -0.15393 | 0.877844 | 0.932717 | -5.50218 |
| AC010463.2  | 0.232564 | 1.481719 | 0.15432  | 0.877534 | 0.932717 | -5.54839 |
| AC004543.1  | -0.22273 | 2.567257 | -0.15496 | 0.877028 | 0.932717 | -5.70683 |
| AC103974.1  | -0.14087 | 4.766024 | -0.15419 | 0.877639 | 0.932717 | -6.19367 |
| LNCsRLR     | -0.12373 | 4.680581 | -0.15424 | 0.877596 | 0.932717 | -6.27225 |
| AF131216.1  | 0.045807 | 4.951045 | 0.154017 | 0.877773 | 0.932717 | -6.29202 |
| AC008149.1  | -0.07971 | 5.444991 | -0.15471 | 0.877224 | 0.932717 | -6.46829 |
| AC093732.1  | 0.073665 | 6.627859 | 0.155397 | 0.876686 | 0.932717 | -6.80221 |
| AC007533.1  | -0.04377 | 6.763046 | -0.15575 | 0.876405 | 0.932717 | -6.85452 |
| U91328.1    | -0.04704 | 7.440526 | -0.15479 | 0.877166 | 0.932717 | -6.98456 |
| AL122035.2  | 0.030948 | 7.73392  | 0.154231 | 0.877604 | 0.932717 | -7.03008 |
| AC023510.1  | -0.27342 | 0.184876 | -0.15339 | 0.878267 | 0.932734 | -5.50235 |
| AC027801.1  | -0.18471 | 0.938483 | -0.15349 | 0.878189 | 0.932734 | -5.53915 |
| KCNIP2-AS1  | -0.03865 | 5.609966 | -0.15315 | 0.878457 | 0.932734 | -6.50389 |
| AC018607.1  | 0.097752 | 6.54723  | 0.152803 | 0.878729 | 0.932734 | -6.73687 |

|            |          |          |          |          |          |          |
|------------|----------|----------|----------|----------|----------|----------|
| AC010768.2 | 0.04761  | 6.795236 | 0.152936 | 0.878624 | 0.932734 | -6.8385  |
| AC005856.1 | -0.0674  | 6.975747 | -0.15317 | 0.878442 | 0.932734 | -6.90594 |
| AC112491.1 | 0.047816 | 12.22319 | 0.152941 | 0.87862  | 0.932734 | -7.68389 |
| AC109597.1 | 0.186726 | 2.723277 | 0.149494 | 0.881335 | 0.935239 | -5.6807  |
| LINC01909  | 0.063786 | 6.079212 | 0.14949  | 0.881338 | 0.935239 | -6.62109 |
| AC008764.9 | 0.051638 | 4.462085 | 0.148747 | 0.881923 | 0.935728 | -6.12286 |
| AC009137.1 | 0.262945 | 1.066163 | 0.147569 | 0.882852 | 0.936332 | -5.51902 |
| AL022157.1 | -0.07177 | 6.138701 | -0.14778 | 0.882685 | 0.936332 | -6.69486 |
| AC015922.2 | -0.08952 | 9.670634 | -0.14755 | 0.882867 | 0.936332 | -7.34405 |
| AL596220.1 | -0.0749  | 5.424452 | -0.14712 | 0.883205 | 0.936558 | -6.50852 |
| AL161729.4 | 0.094438 | 6.061583 | 0.146777 | 0.883476 | 0.936714 | -6.63661 |
| AC093752.2 | 0.138785 | 4.242282 | 0.146225 | 0.883911 | 0.93704  | -6.04974 |
| AC092757.3 | -0.05545 | 5.906937 | -0.14607 | 0.884033 | 0.93704  | -6.61142 |
| AL590705.3 | -0.07986 | 6.536556 | -0.14549 | 0.884493 | 0.937395 | -6.79077 |
| AL022341.2 | -0.07111 | 4.005604 | -0.14475 | 0.885075 | 0.937531 | -6.06193 |
| AC017071.1 | -0.04847 | 4.658612 | -0.14469 | 0.885123 | 0.937531 | -6.20527 |
| AL356740.3 | 0.150858 | 5.582237 | 0.145143 | 0.884764 | 0.937531 | -6.45161 |
| AP001429.1 | -0.05791 | 6.256457 | -0.14482 | 0.88502  | 0.937531 | -6.71642 |
| AC009113.1 | 0.035712 | 7.805503 | 0.144533 | 0.885245 | 0.937531 | -7.04023 |
| PCAT5      | -0.20646 | -2.15358 | -0.14432 | 0.885412 | 0.937576 | -5.41435 |
| AC112694.2 | -0.03412 | 7.337281 | -0.14367 | 0.885927 | 0.937989 | -6.96898 |
| AC079336.4 | 0.156231 | 4.132484 | 0.142726 | 0.88667  | 0.938644 | -6.03323 |
| AC007207.2 | -0.26319 | -0.19053 | -0.14149 | 0.887642 | 0.939119 | -5.48643 |
| AP000753.1 | 0.229901 | 0.3352   | 0.141476 | 0.887656 | 0.939119 | -5.48835 |
| AC004471.2 | -0.11471 | 3.395991 | -0.14191 | 0.88731  | 0.939119 | -5.88499 |
| AL136985.2 | -0.07979 | 5.027711 | -0.14159 | 0.887563 | 0.939119 | -6.3437  |
| AL512343.2 | -0.0494  | 6.585091 | -0.14136 | 0.887744 | 0.939119 | -6.81567 |
| AL139120.1 | 0.039645 | 7.53878  | 0.140813 | 0.888179 | 0.939447 | -6.99793 |
| AC087362.1 | -0.15252 | 3.614062 | -0.14044 | 0.88847  | 0.939622 | -5.96314 |
| AC083843.2 | 0.22554  | -0.12022 | 0.13984  | 0.888947 | 0.939861 | -5.47138 |
| AC104561.3 | 0.172134 | 3.143135 | 0.139846 | 0.888941 | 0.939861 | -5.74536 |
| AC107976.1 | 0.233586 | -1.97156 | 0.139466 | 0.889242 | 0.940041 | -5.40918 |
| AL158207.2 | -0.14312 | 4.326352 | -0.13909 | 0.889536 | 0.94022  | -6.19036 |
| LINC00244  | 0.212986 | 1.821559 | 0.138771 | 0.88979  | 0.940356 | -5.58153 |
| AC092567.1 | -0.24625 | -0.16998 | -0.13854 | 0.889969 | 0.940413 | -5.48881 |
| AC006441.4 | -0.21322 | -0.54786 | -0.13764 | 0.890679 | 0.940629 | -5.46762 |
| AC079015.1 | 0.221175 | 1.089688 | 0.13752  | 0.890777 | 0.940629 | -5.52383 |
| AC012486.1 | 0.228764 | 2.891407 | 0.137715 | 0.890623 | 0.940629 | -5.67816 |
| LINC02202  | -0.0646  | 4.213879 | -0.13749 | 0.890799 | 0.940629 | -6.02673 |
| AC023024.1 | 0.044101 | 6.327032 | 0.137803 | 0.890554 | 0.940629 | -6.7114  |
| AC002044.1 | 0.064403 | 8.302601 | 0.137275 | 0.89097  | 0.940677 | -7.11662 |
| AL035252.4 | -0.0991  | 6.336167 | -0.137   | 0.891184 | 0.940771 | -6.73974 |
| AC026362.1 | 0.028696 | 4.269869 | 0.13664  | 0.891472 | 0.940942 | -6.06148 |
| AC023794.2 | 0.168579 | 3.503176 | 0.136435 | 0.891634 | 0.940981 | -5.83317 |
| AL132655.1 | 0.222997 | 0.390439 | 0.135832 | 0.892109 | 0.941351 | -5.49163 |
| AC092620.2 | 0.146317 | 1.063575 | 0.135533 | 0.892346 | 0.941468 | -5.52712 |
| AL596202.1 | 0.030835 | 7.254326 | 0.134995 | 0.89277  | 0.941732 | -6.92351 |
| AC004253.1 | -0.0297  | 7.754772 | -0.1349  | 0.892846 | 0.941732 | -7.04354 |
| AP002340.1 | 0.090979 | 6.45166  | 0.134238 | 0.893368 | 0.94215  | -6.66084 |
| AL157912.1 | -0.20677 | 1.32981  | -0.13385 | 0.893676 | 0.942342 | -5.5694  |
| AL359555.1 | -0.2165  | -1.75646 | -0.13365 | 0.893834 | 0.942376 | -5.42757 |
| AC018450.1 | 0.192442 | 2.069586 | 0.133395 | 0.894034 | 0.942455 | -5.59822 |
| AC026462.3 | 0.265785 | -0.07527 | 0.131872 | 0.895236 | 0.94301  | -5.47048 |
| AL139161.2 | 0.21463  | 1.040339 | 0.131616 | 0.895439 | 0.94301  | -5.5226  |
| AC099684.1 | -0.17873 | 1.052244 | -0.13239 | 0.894824 | 0.94301  | -5.54685 |
| AF131216.3 | -0.2171  | 2.114492 | -0.13163 | 0.895428 | 0.94301  | -5.63416 |
| AC127526.1 | 0.230582 | 2.537022 | 0.132097 | 0.895058 | 0.94301  | -5.65156 |
| AL121832.1 | -0.16828 | 2.310959 | -0.13174 | 0.895341 | 0.94301  | -5.69208 |

|             |          |          |          |          |          |          |
|-------------|----------|----------|----------|----------|----------|----------|
| AC026748.1  | -0.10659 | 2.612476 | -0.13246 | 0.894773 | 0.94301  | -5.69935 |
| LINC02453   | -0.04852 | 5.061115 | -0.13106 | 0.895879 | 0.943341 | -6.30175 |
| LINC01722   | 0.181426 | -1.48834 | 0.12877  | 0.897687 | 0.944684 | -5.42764 |
| AC018521.7  | -0.06038 | 2.704018 | -0.12849 | 0.897909 | 0.944684 | -5.71772 |
| AC093904.2  | 0.133815 | 5.64224  | 0.128548 | 0.897862 | 0.944684 | -6.4266  |
| AC079305.1  | 0.046957 | 7.252583 | 0.128652 | 0.89778  | 0.944684 | -6.95068 |
| AC005840.4  | 0.034208 | 7.715589 | 0.128788 | 0.897672 | 0.944684 | -7.01521 |
| AC106782.2  | 0.034123 | 8.820593 | 0.1288   | 0.897663 | 0.944684 | -7.19594 |
| AC006333.2  | -0.0279  | 9.250433 | -0.12803 | 0.898273 | 0.944935 | -7.28279 |
| AC008759.3  | -0.18175 | 3.75341  | -0.12687 | 0.899189 | 0.945766 | -5.92856 |
| AL009181.1  | -0.19519 | -0.07952 | -0.12522 | 0.900494 | 0.946068 | -5.48417 |
| AL096817.1  | -0.09971 | 2.650518 | -0.12515 | 0.900549 | 0.946068 | -5.71206 |
| AC068724.1  | -0.12148 | 3.776745 | -0.1256  | 0.900189 | 0.946068 | -5.93333 |
| AC018755.4  | -0.21248 | 4.140509 | -0.12593 | 0.899929 | 0.946068 | -6.04762 |
| AC100774.1  | -0.07263 | 4.370238 | -0.12563 | 0.900166 | 0.946068 | -6.12087 |
| AC005237.1  | -0.12788 | 4.423471 | -0.12572 | 0.900098 | 0.946068 | -6.13744 |
| AC092143.3  | 0.028517 | 6.54347  | 0.125071 | 0.90061  | 0.946068 | -6.79648 |
| AC012467.2  | -0.02889 | 8.766302 | -0.12537 | 0.900374 | 0.946068 | -7.20534 |
| BX284668.5  | -0.05266 | 9.477731 | -0.12547 | 0.900296 | 0.946068 | -7.31284 |
| LINC02206   | 0.203008 | -2.11782 | 0.123909 | 0.901529 | 0.946108 | -5.40716 |
| AP001476.1  | 0.149231 | 1.00349  | 0.124055 | 0.901414 | 0.946108 | -5.52335 |
| AC118555.1  | 0.167693 | 2.241948 | 0.124335 | 0.901192 | 0.946108 | -5.64257 |
| SMCR5       | 0.072435 | 3.632652 | 0.124066 | 0.901405 | 0.946108 | -5.86008 |
| GLIS2-AS1   | 0.114335 | 5.990807 | 0.124107 | 0.901372 | 0.946108 | -6.4942  |
| GRPEL2-AS1  | -0.07407 | 5.820105 | -0.12444 | 0.90111  | 0.946108 | -6.63912 |
| AL136221.1  | 0.066054 | 6.906249 | 0.123913 | 0.901526 | 0.946108 | -6.85549 |
| LINC01765   | 0.216279 | 0.670091 | 0.123539 | 0.901821 | 0.94623  | -5.50318 |
| AC026471.4  | -0.02938 | 9.315574 | -0.12344 | 0.901897 | 0.94623  | -7.29032 |
| AC010809.2  | 0.032327 | 7.17198  | 0.122836 | 0.902377 | 0.946602 | -6.9284  |
| AL590729.1  | 0.033277 | 6.43846  | 0.122635 | 0.902536 | 0.946636 | -6.74866 |
| LINC01374   | -0.21846 | -1.33649 | -0.12188 | 0.903133 | 0.946865 | -5.44125 |
| RERG-IT1    | 0.233085 | 0.226248 | 0.122139 | 0.902928 | 0.946865 | -5.48387 |
| AC008537.2  | -0.03569 | 7.850363 | -0.1219  | 0.903117 | 0.946865 | -7.06334 |
| LINC01713   | -0.20863 | -1.38145 | -0.12161 | 0.903343 | 0.946883 | -5.44026 |
| AC008752.1  | -0.14067 | 3.799033 | -0.12112 | 0.903733 | 0.946883 | -5.96228 |
| DENND5B-AS1 | -0.04942 | 4.807214 | -0.12151 | 0.903427 | 0.946883 | -6.22468 |
| AC126768.2  | 0.187154 | 5.077331 | 0.121063 | 0.90378  | 0.946883 | -6.2338  |
| AC007496.1  | 0.027721 | 6.279845 | 0.121199 | 0.903672 | 0.946883 | -6.74323 |
| AC022296.3  | 0.211342 | 0.761135 | 0.119548 | 0.904977 | 0.948006 | -5.50998 |
| AC025031.1  | -0.10871 | 3.768009 | -0.11859 | 0.905733 | 0.948618 | -5.92305 |
| AC006504.8  | -0.04435 | 7.817204 | -0.11849 | 0.905814 | 0.948618 | -7.05566 |
| AC012368.2  | 0.104863 | 5.200265 | 0.117979 | 0.906219 | 0.948909 | -6.22641 |
| AP006621.4  | 0.070574 | 7.606487 | 0.11777  | 0.906384 | 0.94895  | -7.00852 |
| AL807761.4  | -0.1484  | -0.55807 | -0.117   | 0.906993 | 0.949455 | -5.47106 |
| AC092868.2  | 0.04081  | 7.242437 | 0.115902 | 0.907862 | 0.950233 | -6.9415  |
| AC083805.1  | 0.098927 | 1.295523 | 0.115611 | 0.908092 | 0.950341 | -5.55154 |
| AC010624.2  | 0.201478 | 0.350425 | 0.115385 | 0.908271 | 0.950396 | -5.49001 |
| AC008686.1  | -0.08738 | 3.188429 | -0.11481 | 0.908724 | 0.950737 | -5.84609 |
| PLCH1-AS1   | -0.17841 | 0.243624 | -0.11398 | 0.909382 | 0.951036 | -5.49926 |
| Z84723.1    | 0.109752 | 3.444825 | 0.113801 | 0.909525 | 0.951036 | -5.84413 |
| LINC00900   | -0.05079 | 4.485171 | -0.11377 | 0.909549 | 0.951036 | -6.18964 |
| AC080112.3  | -0.03171 | 5.525684 | -0.11426 | 0.909165 | 0.951036 | -6.50629 |
| AC106782.6  | -0.02543 | 8.013029 | -0.11365 | 0.909643 | 0.951036 | -7.09063 |
| AC097478.4  | 0.184053 | 1.348621 | 0.113307 | 0.909916 | 0.951183 | -5.54899 |
| AC087878.1  | -0.15114 | 2.481429 | -0.11315 | 0.910037 | 0.951183 | -5.68272 |
| AC092118.1  | 0.069317 | 4.936699 | 0.11222  | 0.910777 | 0.951825 | -6.18766 |
| AL645608.2  | 0.086336 | 3.602451 | 0.111022 | 0.911725 | 0.952683 | -5.91413 |
| AC093206.1  | -0.19146 | -1.37449 | -0.10976 | 0.912722 | 0.953592 | -5.44199 |

|              |          |          |          |          |          |          |
|--------------|----------|----------|----------|----------|----------|----------|
| AP000944.1   | 0.144404 | 3.128688 | 0.10929  | 0.913097 | 0.953793 | -5.76159 |
| AC243829.1   | 0.111252 | 3.459848 | 0.1092   | 0.913169 | 0.953793 | -5.85406 |
| AC008781.1   | -0.02752 | 5.34056  | -0.10849 | 0.913732 | 0.954249 | -6.47034 |
| AL139123.1   | -0.0411  | 6.220393 | -0.10796 | 0.914153 | 0.954557 | -6.7241  |
| AC005393.1   | -0.03874 | 6.140505 | -0.1075  | 0.914516 | 0.954802 | -6.70934 |
| CR559946.1   | 0.11481  | 3.561208 | 0.106866 | 0.915017 | 0.955193 | -5.84786 |
| LZTS1-AS1    | 0.16697  | -0.09764 | 0.105921 | 0.915766 | 0.955444 | -5.47763 |
| AC098850.1   | -0.17985 | 0.263998 | -0.10624 | 0.915514 | 0.955444 | -5.50205 |
| AC010735.2   | -0.06082 | 6.338149 | -0.10617 | 0.915571 | 0.955444 | -6.73928 |
| AC087276.2   | 0.025632 | 6.38068  | 0.106043 | 0.915669 | 0.955444 | -6.74337 |
| ARHGAP26-IT1 | -0.17057 | 2.137843 | -0.10557 | 0.916041 | 0.955465 | -5.65442 |
| AP000777.2   | -0.11915 | 3.309674 | -0.10567 | 0.915963 | 0.955465 | -5.85979 |
| AC104076.1   | 0.195379 | -0.50146 | 0.104626 | 0.916792 | 0.95551  | -5.4598  |
| AL359771.1   | 0.237615 | 1.441773 | 0.104728 | 0.916711 | 0.95551  | -5.54498 |
| AC020910.6   | -0.07892 | 3.65361  | -0.10474 | 0.9167   | 0.95551  | -5.88491 |
| AL606468.1   | 0.119019 | 3.764052 | 0.104755 | 0.916689 | 0.95551  | -5.90407 |
| AC079148.1   | 0.032229 | 5.395996 | 0.104741 | 0.916701 | 0.95551  | -6.4612  |
| AC107294.2   | -0.05738 | 6.482526 | -0.10456 | 0.916847 | 0.95551  | -6.77173 |
| AP001010.1   | 0.112304 | 3.769575 | 0.103774 | 0.917467 | 0.956024 | -5.85204 |
| AC007608.4   | -0.06813 | 3.157741 | -0.1028  | 0.91824  | 0.956696 | -5.82135 |
| AC026310.3   | -0.10557 | 2.052452 | -0.10247 | 0.918504 | 0.956719 | -5.64339 |
| AC069549.1   | -0.04026 | 7.586178 | -0.10245 | 0.918517 | 0.956719 | -7.03838 |
| BX255925.1   | -0.04465 | 6.010904 | -0.10141 | 0.919337 | 0.957441 | -6.60856 |
| AP002967.1   | -0.15581 | 0.905707 | -0.10108 | 0.919603 | 0.957585 | -5.54483 |
| AC131888.1   | 0.064733 | 3.649154 | 0.100547 | 0.920024 | 0.957891 | -5.86813 |
| AL591885.1   | 0.139027 | -0.93155 | 0.099881 | 0.920552 | 0.958175 | -5.44891 |
| APOA1-AS     | -0.06253 | 5.134703 | -0.10001 | 0.920448 | 0.958175 | -6.28371 |
| AC093157.2   | 0.035314 | 6.884217 | 0.09893  | 0.921307 | 0.958828 | -6.8627  |
| SEC23A-AS1   | -0.15619 | 0.527015 | -0.09815 | 0.921928 | 0.959341 | -5.51522 |
| AC004217.1   | 0.145984 | 1.316539 | 0.097716 | 0.922269 | 0.959444 | -5.54307 |
| AC243772.2   | -0.05327 | 4.375992 | -0.09738 | 0.922538 | 0.959444 | -6.13923 |
| AC004466.3   | -0.03778 | 6.25013  | -0.09738 | 0.922532 | 0.959444 | -6.7103  |
| AC008906.1   | -0.02557 | 7.534146 | -0.09767 | 0.922308 | 0.959444 | -7.00167 |
| AL096803.3   | -0.16558 | -0.13176 | -0.09691 | 0.922907 | 0.959696 | -5.49038 |
| AC010542.1   | 0.121908 | 4.116149 | 0.09522  | 0.924248 | 0.960824 | -5.90633 |
| LAMC1-AS1    | -0.03859 | 7.171468 | -0.09538 | 0.924123 | 0.960824 | -6.94245 |
| AC079610.2   | 0.047493 | 6.255859 | 0.094932 | 0.924476 | 0.960929 | -6.74353 |
| AC016493.1   | -0.15178 | -1.40548 | -0.09432 | 0.924962 | 0.960934 | -5.44008 |
| AL136307.1   | 0.173736 | -1.03767 | 0.09447  | 0.924844 | 0.960934 | -5.44796 |
| AMMECR1-IT1  | -0.1314  | 1.581601 | -0.09423 | 0.92503  | 0.960934 | -5.60155 |
| AC084880.3   | 0.160106 | 1.610869 | 0.093797 | 0.925377 | 0.960934 | -5.61848 |
| AL109935.1   | -0.11998 | 3.297153 | -0.09398 | 0.925233 | 0.960934 | -5.82117 |
| AC011773.3   | -0.06892 | 4.335412 | -0.0944  | 0.924896 | 0.960934 | -6.05299 |
| AC011120.1   | -0.02289 | 6.447607 | -0.09383 | 0.925353 | 0.960934 | -6.77798 |
| AL353593.1   | 0.033026 | 5.869978 | 0.092887 | 0.926099 | 0.961495 | -6.61494 |
| AL021707.5   | 0.049277 | 6.295239 | 0.092793 | 0.926173 | 0.961495 | -6.68777 |
| Z99943.1     | 0.099    | 3.778473 | 0.091708 | 0.927034 | 0.962256 | -5.93208 |
| RAET1E-AS1   | 0.133195 | 2.431623 | 0.091353 | 0.927316 | 0.962415 | -5.69382 |
| AL158832.1   | 0.158807 | -0.54505 | 0.090852 | 0.927714 | 0.962695 | -5.46188 |
| Z82173.1     | 0.15054  | 0.914587 | 0.090556 | 0.927948 | 0.962805 | -5.51925 |
| FALEC        | 0.064879 | 5.604528 | 0.090094 | 0.928315 | 0.963053 | -6.56966 |
| AC073911.3   | 0.141264 | -0.14344 | 0.088665 | 0.929449 | 0.964096 | -5.4757  |
| AP001107.1   | 0.014185 | 6.824754 | 0.088318 | 0.929725 | 0.964249 | -6.85396 |
| AC140912.1   | 0.139252 | -0.70932 | 0.088096 | 0.9299   | 0.964298 | -5.45574 |
| AC011239.1   | -0.1561  | -1.19504 | -0.08713 | 0.930668 | 0.964507 | -5.44982 |
| AL121890.2   | 0.13742  | 1.450604 | 0.087343 | 0.930498 | 0.964507 | -5.5711  |
| AL451069.2   | -0.1102  | 2.877362 | -0.08747 | 0.930396 | 0.964507 | -5.93044 |
| AL121672.3   | 0.077441 | 4.663295 | 0.086872 | 0.930872 | 0.964507 | -6.19877 |

|            |          |          |          |          |          |          |
|------------|----------|----------|----------|----------|----------|----------|
| AC092384.2 | 0.051349 | 4.685026 | 0.086955 | 0.930806 | 0.964507 | -6.2328  |
| AC020663.3 | 0.016749 | 6.319305 | 0.086953 | 0.930808 | 0.964507 | -6.74146 |
| AC015917.2 | 0.122346 | 3.658205 | 0.086067 | 0.931511 | 0.964689 | -5.81761 |
| AL159169.3 | -0.08488 | 3.994657 | -0.08647 | 0.93119  | 0.964689 | -6.05999 |
| AC096649.1 | 0.064014 | 5.321996 | 0.086292 | 0.931332 | 0.964689 | -6.22943 |
| SENCR      | -0.0326  | 6.145228 | -0.086   | 0.931561 | 0.964689 | -6.68658 |
| AC009511.2 | 0.120381 | 1.797198 | 0.085336 | 0.932092 | 0.965105 | -5.60227 |
| AC112719.2 | 0.075379 | 2.50806  | 0.08434  | 0.932882 | 0.965791 | -5.67858 |
| AP001412.1 | -0.02484 | 5.585314 | -0.08392 | 0.933214 | 0.966001 | -6.4908  |
| AC084824.4 | -0.01556 | 8.985785 | -0.08375 | 0.933349 | 0.966007 | -7.23983 |
| AC093151.3 | 0.081546 | 2.608877 | 0.083101 | 0.933865 | 0.966276 | -5.69758 |
| LINC00943  | 0.075271 | 3.313857 | 0.083153 | 0.933824 | 0.966276 | -5.80682 |
| AC092839.2 | 0.131651 | 2.204651 | 0.082797 | 0.934107 | 0.966393 | -5.62992 |
| GRTP1-AS1  | -0.03093 | 5.652986 | -0.08262 | 0.934251 | 0.966409 | -6.5389  |
| AC097347.1 | 0.107666 | 4.625973 | 0.082067 | 0.934687 | 0.966726 | -6.0732  |
| AC006213.6 | 0.110724 | 4.935834 | 0.081158 | 0.935408 | 0.96734  | -6.16566 |
| AC068888.2 | -0.01846 | 7.188855 | -0.08091 | 0.935604 | 0.967408 | -6.93353 |
| AC027307.2 | -0.02056 | 9.963837 | -0.08071 | 0.935761 | 0.967439 | -7.38982 |
| AC090617.8 | 0.139629 | 2.66945  | 0.080539 | 0.9359   | 0.967449 | -5.71344 |
| AC008747.1 | 0.124954 | 1.237016 | 0.08012  | 0.936233 | 0.96755  | -5.55031 |
| AC026704.1 | -0.02558 | 6.461078 | -0.08009 | 0.936256 | 0.96755  | -6.76206 |
| AC104984.6 | -0.03857 | 6.489817 | -0.07991 | 0.936398 | 0.967564 | -6.79109 |
| AC006487.1 | -0.10795 | 1.767312 | -0.07952 | 0.936707 | 0.967751 | -5.61698 |
| AC004009.2 | -0.15789 | -0.85912 | -0.07899 | 0.93713  | 0.967954 | -5.45922 |
| AC007216.4 | 0.025834 | 6.875657 | 0.07895  | 0.937162 | 0.967954 | -6.86497 |
| UBXN7-AS1  | 0.054722 | 6.03376  | 0.078723 | 0.937343 | 0.968008 | -6.49026 |
| AC103681.2 | 0.097544 | 2.663828 | 0.07856  | 0.937471 | 0.968008 | -5.69563 |
| AC019080.3 | 0.031283 | 7.870795 | 0.078244 | 0.937723 | 0.968134 | -7.05733 |
| Z97192.3   | 0.077487 | 2.159313 | 0.077265 | 0.9385   | 0.968804 | -5.63742 |
| LINC01700  | -0.11342 | -2.13999 | -0.07681 | 0.938859 | 0.96904  | -5.41966 |
| AL080317.1 | 0.014901 | 9.484983 | 0.076504 | 0.939105 | 0.969162 | -7.30646 |
| AP001626.1 | -0.10179 | -0.77571 | -0.0758  | 0.939666 | 0.969555 | -5.46321 |
| AF213884.3 | 0.034003 | 5.603886 | 0.0757   | 0.939744 | 0.969555 | -6.5097  |
| AC021860.1 | -0.1343  | -1.11084 | -0.07527 | 0.940085 | 0.969697 | -5.45354 |
| FO393419.2 | -0.01982 | 6.573349 | -0.0752  | 0.94014  | 0.969697 | -6.81239 |
| AC080023.1 | -0.03967 | 6.077121 | -0.07435 | 0.940815 | 0.970259 | -6.68435 |
| UCKL1-AS1  | 0.01905  | 7.259655 | 0.074074 | 0.941036 | 0.970355 | -6.94947 |
| CARD8-AS1  | 0.01858  | 8.243646 | 0.073898 | 0.941176 | 0.970365 | -7.11845 |
| AC068768.1 | -0.07226 | 4.186878 | -0.07364 | 0.941377 | 0.970395 | -6.03175 |
| AL024498.1 | -0.02686 | 5.522327 | -0.07354 | 0.941463 | 0.970395 | -6.4929  |
| LINC02547  | 0.099494 | -2.31622 | 0.073023 | 0.941871 | 0.970557 | -5.40762 |
| AC244093.5 | 0.029334 | 6.01949  | 0.073013 | 0.941878 | 0.970557 | -6.62281 |
| AC090136.3 | 0.077992 | 0.711061 | 0.07254  | 0.942255 | 0.970812 | -5.52161 |
| AC078820.1 | 0.116064 | 3.005289 | 0.072308 | 0.942439 | 0.970868 | -5.72809 |
| AP000553.3 | -0.11183 | 1.176591 | -0.07207 | 0.942625 | 0.970927 | -5.55743 |
| AC110760.1 | -0.12727 | -1.51175 | -0.07182 | 0.942825 | 0.971    | -5.43832 |
| AC055764.1 | 0.042358 | 6.460175 | 0.071014 | 0.943467 | 0.971528 | -6.74871 |
| AC074011.1 | -0.04683 | 5.118695 | -0.0708  | 0.94364  | 0.971573 | -6.3928  |
| AL513477.2 | -0.02261 | 7.215557 | -0.07062 | 0.943778 | 0.971582 | -6.95481 |
| AC080188.1 | -0.06512 | 4.774936 | -0.07046 | 0.943909 | 0.971584 | -6.19448 |
| AC011447.7 | 0.046295 | 6.8922   | 0.068428 | 0.945523 | 0.973111 | -6.85475 |
| AC092067.1 | -0.05503 | 4.899838 | -0.06803 | 0.945839 | 0.973304 | -6.28746 |
| AC020911.1 | -0.01476 | 6.033632 | -0.06714 | 0.946549 | 0.973901 | -6.61413 |
| AC005695.2 | 0.058174 | 5.434351 | 0.066865 | 0.946765 | 0.97399  | -6.35298 |
| FOXN3-AS1  | 0.018926 | 8.54999  | 0.066617 | 0.946962 | 0.974059 | -7.17113 |
| AC100793.3 | -0.06812 | 3.229015 | -0.06627 | 0.947235 | 0.974206 | -5.83918 |
| AC013564.1 | 0.1114   | -0.86042 | 0.065445 | 0.947894 | 0.974217 | -5.45185 |
| KLHL6-AS1  | 0.096499 | 2.705499 | 0.065876 | 0.947551 | 0.974217 | -5.68867 |

|             |          |          |          |          |          |          |
|-------------|----------|----------|----------|----------|----------|----------|
| AC074050.4  | -0.05396 | 4.25059  | -0.06555 | 0.947811 | 0.974217 | -6.10535 |
| AP003354.1  | 0.046843 | 5.253353 | 0.065536 | 0.947821 | 0.974217 | -6.32768 |
| ASH1L-IT1   | -0.03134 | 5.847818 | -0.06545 | 0.947893 | 0.974217 | -6.58453 |
| AC084024.3  | 0.088717 | 2.273211 | 0.064936 | 0.948299 | 0.974367 | -5.65394 |
| AL132989.2  | 0.015666 | 7.194187 | 0.065081 | 0.948184 | 0.974367 | -6.93428 |
| AC036222.2  | -0.11775 | -1.07667 | -0.06468 | 0.948503 | 0.974443 | -5.45143 |
| RASGRF2-AS1 | 0.053329 | 3.189267 | 0.064052 | 0.949001 | 0.974662 | -5.79848 |
| AL139807.1  | -0.03083 | 5.688407 | -0.06395 | 0.94908  | 0.974662 | -6.55665 |
| AL132780.4  | 0.037681 | 6.823053 | 0.063921 | 0.949105 | 0.974662 | -6.85467 |
| AC026202.3  | 0.083455 | 1.093904 | 0.063137 | 0.949729 | 0.974827 | -5.54183 |
| AC007431.1  | -0.0327  | 4.8663   | -0.06317 | 0.949702 | 0.974827 | -6.256   |
| AP003108.4  | -0.02491 | 5.030305 | -0.06326 | 0.949635 | 0.974827 | -6.35467 |
| AC004232.3  | -0.01451 | 6.929233 | -0.06307 | 0.949785 | 0.974827 | -6.87822 |
| AC022165.1  | 0.045563 | 5.376148 | 0.062789 | 0.950006 | 0.974921 | -6.42921 |
| AL583722.1  | 0.055968 | 4.937535 | 0.062051 | 0.950593 | 0.97539  | -6.17823 |
| AC240565.2  | -0.01826 | 6.297911 | -0.06104 | 0.951393 | 0.976077 | -6.7423  |
| AC008033.3  | 0.077574 | 2.36985  | 0.060281 | 0.952    | 0.976567 | -5.64552 |
| TOLLIP-AS1  | 0.016279 | 8.085726 | 0.060091 | 0.952152 | 0.976589 | -7.09697 |
| AC012456.2  | 0.098868 | 0.48498  | 0.058219 | 0.95364  | 0.976958 | -5.50832 |
| Z95114.1    | -0.02586 | 1.338195 | -0.05929 | 0.952787 | 0.976958 | -5.5656  |
| AC097505.1  | 0.07352  | 2.787619 | 0.058755 | 0.953214 | 0.976958 | -5.71346 |
| NAV2-AS2    | -0.06083 | 3.432507 | -0.05828 | 0.953589 | 0.976958 | -5.90617 |
| CERS3-AS1   | 0.10667  | 3.962425 | 0.058372 | 0.953519 | 0.976958 | -5.96292 |
| AC007496.3  | -0.0151  | 4.861686 | -0.05817 | 0.953681 | 0.976958 | -6.26772 |
| AL359878.1  | -0.01535 | 5.230828 | -0.05916 | 0.95289  | 0.976958 | -6.3664  |
| AC100793.2  | 0.037797 | 5.355835 | 0.058973 | 0.953041 | 0.976958 | -6.46137 |
| AC011247.1  | 0.025187 | 6.954893 | 0.058725 | 0.953237 | 0.976958 | -6.88663 |
| AC104316.1  | 0.035024 | 5.15492  | 0.057554 | 0.954169 | 0.977324 | -6.34538 |
| AC021092.1  | -0.03458 | 3.393348 | -0.05702 | 0.954597 | 0.977629 | -5.86809 |
| AC079950.1  | -0.08832 | -2.16225 | -0.05644 | 0.955058 | 0.977701 | -5.41981 |
| AC044849.1  | 0.030603 | 4.983391 | 0.056655 | 0.954884 | 0.977701 | -6.28234 |
| AC012186.2  | 0.02762  | 5.980167 | 0.056497 | 0.95501  | 0.977701 | -6.61741 |
| AC008115.4  | 0.042222 | 4.762396 | 0.056246 | 0.955209 | 0.977723 | -6.12699 |
| AL359853.2  | 0.051304 | 5.110873 | 0.055679 | 0.955661 | 0.978052 | -6.2002  |
| AC110285.7  | -0.03064 | 7.506631 | -0.0555  | 0.955804 | 0.978066 | -6.99305 |
| AC007663.4  | -0.01407 | 6.593457 | -0.05533 | 0.955935 | 0.978066 | -6.81668 |
| AC107294.3  | -0.05191 | 4.963496 | -0.05439 | 0.956688 | 0.978436 | -6.25051 |
| AC013489.3  | 0.026489 | 5.085867 | 0.054695 | 0.956444 | 0.978436 | -6.34342 |
| ADIRF-AS1   | -0.02514 | 8.138708 | -0.05447 | 0.956624 | 0.978436 | -7.11431 |
| AC068506.1  | 0.078975 | 2.127238 | 0.053944 | 0.957041 | 0.978665 | -5.67139 |
| AP001922.6  | 0.054654 | 4.13384  | 0.053249 | 0.957594 | 0.979097 | -6.01578 |
| AC012555.2  | 0.091955 | 0.021983 | 0.05266  | 0.958063 | 0.97931  | -5.48915 |
| AC004678.2  | -0.02402 | 5.752488 | -0.05272 | 0.958012 | 0.97931  | -6.53693 |
| AC087683.2  | 0.026543 | 6.034948 | 0.052171 | 0.958452 | 0.979574 | -6.69195 |
| AC092134.2  | -0.07535 | -2.28118 | -0.05137 | 0.959091 | 0.980094 | -5.41483 |
| CAMTA1-IT1  | -0.0922  | -0.83902 | -0.05052 | 0.959768 | 0.980401 | -5.45803 |
| AC015656.1  | 0.068479 | 1.021887 | 0.050498 | 0.959782 | 0.980401 | -5.53991 |
| AC012100.3  | 0.048142 | 4.051399 | 0.050527 | 0.95976  | 0.980401 | -5.99563 |
| AC114763.2  | -0.03972 | 5.089553 | -0.05007 | 0.960124 | 0.980616 | -6.27485 |
| AC002480.2  | 0.06577  | 2.66633  | 0.049541 | 0.960545 | 0.980779 | -5.70172 |
| AC016026.1  | -0.01638 | 4.0844   | -0.04964 | 0.960466 | 0.980779 | -6.06075 |
| Z95624.1    | 0.079594 | -0.18311 | 0.048861 | 0.961086 | 0.980957 | -5.47932 |
| AL138921.1  | -0.00895 | 6.055479 | -0.04883 | 0.961111 | 0.980957 | -6.64394 |
| AL121761.1  | -0.03463 | 7.928226 | -0.04911 | 0.960884 | 0.980957 | -7.08511 |
| AL590822.2  | -0.01908 | 4.055898 | -0.04817 | 0.961633 | 0.981357 | -6.00018 |
| AC025262.2  | -0.04004 | 3.479072 | -0.04691 | 0.962636 | 0.982247 | -5.89437 |
| AC093503.3  | -0.04321 | 1.659097 | -0.04668 | 0.962825 | 0.982306 | -5.59988 |
| AC018755.1  | 0.069374 | -1.4521  | 0.046121 | 0.963266 | 0.982623 | -5.4354  |

|             |          |          |          |          |          |          |
|-------------|----------|----------|----------|----------|----------|----------|
| AC097641.2  | -0.00907 | 7.808677 | -0.04579 | 0.96353  | 0.982758 | -7.05314 |
| AC009812.4  | 0.02054  | 6.646923 | 0.045547 | 0.963723 | 0.982776 | -6.79617 |
| AL138787.2  | -0.0144  | 6.505223 | -0.04544 | 0.963809 | 0.982776 | -6.80095 |
| LINC02373   | 0.067275 | 2.846615 | 0.045196 | 0.964002 | 0.98284  | -5.73012 |
| PSPC1-AS2   | -0.0113  | 7.852901 | -0.04491 | 0.964229 | 0.982938 | -7.06121 |
| AC097103.1  | -0.08136 | 0.412589 | -0.04443 | 0.964612 | 0.983195 | -5.51124 |
| FO704657.1  | 0.059208 | 2.743167 | 0.043013 | 0.96574  | 0.984064 | -5.71932 |
| AC007610.2  | -0.03787 | 4.02406  | -0.04311 | 0.965663 | 0.984064 | -5.95607 |
| AC008637.1  | 0.030408 | 6.124623 | 0.042865 | 0.965858 | 0.984064 | -6.69021 |
| AC114271.1  | 0.009776 | 5.952613 | 0.041964 | 0.966575 | 0.984661 | -6.62482 |
| NALT1       | -0.01698 | 6.342338 | -0.0415  | 0.966946 | 0.984905 | -6.77317 |
| LINC02391   | 0.056052 | 1.81773  | 0.041193 | 0.967189 | 0.984952 | -5.60187 |
| PRKAR2A-AS1 | -0.01035 | 6.337503 | -0.04111 | 0.967254 | 0.984952 | -6.74106 |
| AP001610.2  | 0.077548 | 0.260473 | 0.040578 | 0.967678 | 0.985083 | -5.49953 |
| AC092042.1  | -0.05377 | 2.330032 | -0.04029 | 0.967907 | 0.985083 | -5.74918 |
| AC068790.6  | 0.035492 | 5.46188  | 0.040734 | 0.967554 | 0.985083 | -6.4386  |
| AC127024.3  | -0.02255 | 6.903138 | -0.04033 | 0.967876 | 0.985083 | -6.88755 |
| AL158211.5  | -0.01616 | 6.445509 | -0.03989 | 0.968226 | 0.985275 | -6.78111 |
| AC079336.3  | 0.018161 | 6.267335 | 0.038005 | 0.969727 | 0.986668 | -6.7377  |
| AC134312.3  | -0.0715  | 0.406473 | -0.03768 | 0.969985 | 0.986798 | -5.50621 |
| AL360181.2  | 0.006764 | 9.194748 | 0.037119 | 0.970433 | 0.987119 | -7.27114 |
| AC138965.2  | -0.0621  | -1.6293  | -0.03673 | 0.970745 | 0.987303 | -5.43662 |
| BSN-DT      | 0.045322 | 0.197189 | 0.036074 | 0.971264 | 0.987697 | -5.49484 |
| AC005832.1  | -0.05887 | 0.256456 | -0.03572 | 0.97155  | 0.987854 | -5.50294 |
| AC099550.1  | 0.05518  | 0.142164 | 0.034754 | 0.972315 | 0.987991 | -5.49393 |
| AC120349.2  | -0.05715 | 1.852866 | -0.03472 | 0.972342 | 0.987991 | -5.61583 |
| AL353708.1  | 0.011599 | 4.949019 | 0.034859 | 0.972231 | 0.987991 | -6.32138 |
| AC007216.2  | -0.00805 | 7.820323 | -0.03503 | 0.972097 | 0.987991 | -7.0532  |
| AC097468.3  | -0.00745 | 9.244978 | -0.03534 | 0.971851 | 0.987991 | -7.2783  |
| AL162584.1  | -0.04599 | 1.90709  | -0.0345  | 0.972515 | 0.988033 | -5.60992 |
| C10orf25    | -0.01055 | 7.099591 | -0.03398 | 0.97293  | 0.988321 | -6.91718 |
| AC131649.2  | -0.01172 | 7.338588 | -0.03342 | 0.973381 | 0.988645 | -6.9812  |
| AC133106.1  | 0.05701  | 0.463803 | 0.031996 | 0.974512 | 0.989125 | -5.50876 |
| AC008734.1  | -0.03632 | 3.535972 | -0.03207 | 0.974451 | 0.989125 | -5.88085 |
| AC018552.3  | -0.02912 | 4.57344  | -0.03206 | 0.97446  | 0.989125 | -6.11931 |
| AC005837.3  | -0.02711 | 5.54068  | -0.03226 | 0.9743   | 0.989125 | -6.53969 |
| AC009237.14 | 0.013957 | 9.415315 | 0.032118 | 0.974414 | 0.989125 | -7.30279 |
| C9orf139    | -0.01192 | 3.791824 | -0.03179 | 0.974672 | 0.989154 | -5.95912 |
| LINC01013   | 0.027326 | 2.028066 | 0.031542 | 0.974873 | 0.989225 | -5.64483 |
| AC069528.2  | -0.00866 | 6.684718 | -0.03057 | 0.975643 | 0.989839 | -6.82797 |
| PRKCZ-AS1   | 0.00836  | 8.581129 | 0.030452 | 0.975741 | 0.989839 | -7.17834 |
| AC012645.3  | -0.01433 | 5.491213 | -0.03001 | 0.976094 | 0.990062 | -6.51018 |
| LINC01388   | 0.053407 | -0.9627  | 0.029778 | 0.976278 | 0.990063 | -5.45507 |
| AC009908.1  | 0.050867 | -0.31229 | 0.029564 | 0.976448 | 0.990063 | -5.47717 |
| LINC02432   | 0.039302 | 2.465759 | 0.029512 | 0.97649  | 0.990063 | -5.70052 |
| AC128687.2  | 0.033139 | 3.522704 | 0.029223 | 0.97672  | 0.990163 | -5.87184 |
| AC138466.4  | -0.04731 | -1.76315 | -0.02839 | 0.97738  | 0.990344 | -5.43031 |
| AL079342.3  | -0.03119 | 1.254573 | -0.02809 | 0.977621 | 0.990344 | -5.56134 |
| AC025809.2  | 0.036877 | 1.42607  | 0.02784  | 0.977821 | 0.990344 | -5.56743 |
| AC015819.1  | 0.017383 | 5.580887 | 0.028099 | 0.977615 | 0.990344 | -6.52657 |
| AL512652.1  | 0.012542 | 5.786724 | 0.027985 | 0.977706 | 0.990344 | -6.60608 |
| AL354893.2  | 0.013943 | 6.087838 | 0.028132 | 0.977588 | 0.990344 | -6.68509 |
| C5orf66-AS1 | 0.024917 | 7.931434 | 0.028337 | 0.977425 | 0.990344 | -7.09268 |
| AC079630.1  | 0.022006 | 3.943269 | 0.027648 | 0.977974 | 0.990365 | -5.99012 |
| AC114781.2  | 0.029413 | 3.99527  | 0.027248 | 0.978293 | 0.990446 | -6.03881 |
| PDCD4-AS1   | 0.007241 | 8.466542 | 0.027218 | 0.978317 | 0.990446 | -7.16082 |
| LINC02135   | 0.039224 | -1.76497 | 0.02664  | 0.978777 | 0.990514 | -5.42836 |
| AC037450.1  | 0.046406 | -1.21722 | 0.026746 | 0.978693 | 0.990514 | -5.4443  |



|             |          |          |          |          |          |          |
|-------------|----------|----------|----------|----------|----------|----------|
| AC023481.1  | -0.04231 | -0.4612  | -0.02664 | 0.97878  | 0.990514 | -5.47234 |
| LINC02035   | 0.007301 | 9.43715  | 0.026427 | 0.978946 | 0.990549 | -7.31134 |
| AC087222.1  | 0.007774 | 7.311685 | 0.026216 | 0.979115 | 0.990586 | -6.96366 |
| AL512785.1  | 0.040456 | 3.172964 | 0.025721 | 0.979509 | 0.990814 | -5.77543 |
| AL035071.2  | -0.00603 | 7.252359 | -0.0256  | 0.979604 | 0.990814 | -6.94886 |
| AC016355.1  | 0.007308 | 6.777175 | 0.024745 | 0.980287 | 0.991371 | -6.83587 |
| AC006449.6  | 0.005983 | 7.62438  | 0.023716 | 0.981106 | 0.992066 | -7.02557 |
| AC012065.3  | -0.01486 | 6.022017 | -0.02345 | 0.981316 | 0.992145 | -6.68003 |
| AC022960.2  | 0.01574  | 4.174349 | 0.023061 | 0.981628 | 0.992327 | -6.05134 |
| AC018695.6  | 0.019999 | 6.118523 | 0.022197 | 0.982316 | 0.992888 | -6.65364 |
| AL132800.1  | -0.00997 | 5.908093 | -0.02154 | 0.982837 | 0.993281 | -6.64708 |
| AP000569.1  | -0.02161 | 3.35215  | -0.02032 | 0.983807 | 0.994074 | -5.85348 |
| AC138028.1  | -0.00872 | 3.691421 | -0.02023 | 0.983886 | 0.994074 | -5.92742 |
| ATP11A-AS1  | 0.015136 | 3.568163 | 0.019891 | 0.984153 | 0.99421  | -5.90197 |
| AC010680.3  | 0.021051 | 4.138321 | 0.019119 | 0.984768 | 0.994698 | -6.00684 |
| CPEB1-AS1   | 0.01487  | 1.328196 | 0.018906 | 0.984937 | 0.994735 | -5.56504 |
| AC004777.1  | -0.03325 | 0.331115 | -0.01824 | 0.985466 | 0.994972 | -5.50636 |
| AC009365.3  | 0.017896 | 3.08475  | 0.017448 | 0.986099 | 0.994972 | -5.78487 |
| AC022872.1  | 0.015508 | 3.475289 | 0.017451 | 0.986097 | 0.994972 | -5.86703 |
| AC104031.1  | 0.026466 | 4.509802 | 0.018174 | 0.985521 | 0.994972 | -6.10591 |
| LINC00528   | 0.009155 | 4.40114  | 0.017682 | 0.985913 | 0.994972 | -6.11559 |
| AC021087.1  | -0.00957 | 5.387325 | -0.01794 | 0.985709 | 0.994972 | -6.47366 |
| AC002128.1  | 0.005193 | 7.57213  | 0.01792  | 0.985723 | 0.994972 | -7.01104 |
| PCAT14      | -0.02486 | -0.50936 | -0.01685 | 0.986579 | 0.995322 | -5.47223 |
| AC107982.3  | 0.007592 | 5.96988  | 0.01668  | 0.986711 | 0.995322 | -6.63761 |
| AL050343.2  | -0.01538 | 4.838158 | -0.01626 | 0.987045 | 0.995525 | -6.22376 |
| AC013565.3  | -0.0254  | -0.25195 | -0.01545 | 0.987694 | 0.99568  | -5.47889 |
| AL162386.2  | 0.026617 | 0.834009 | 0.015403 | 0.987728 | 0.99568  | -5.52459 |
| AC243836.1  | -0.02422 | 1.607174 | -0.01564 | 0.987543 | 0.99568  | -5.59088 |
| AC116447.1  | -0.01152 | 5.652155 | -0.01548 | 0.987664 | 0.99568  | -6.43394 |
| LINC02266   | 0.023839 | -0.11539 | 0.014586 | 0.988379 | 0.995741 | -5.48378 |
| TMEM78      | 0.014934 | 1.518706 | 0.014743 | 0.988254 | 0.995741 | -5.58544 |
| PHKA1-AS1   | 0.020217 | 1.864113 | 0.014797 | 0.988211 | 0.995741 | -5.61532 |
| AL031663.3  | 0.015422 | 1.949458 | 0.013621 | 0.989148 | 0.995741 | -5.62038 |
| AL845472.1  | 0.014212 | 1.959717 | 0.014115 | 0.988754 | 0.995741 | -5.62928 |
| AC026401.1  | -0.01742 | 3.108342 | -0.01393 | 0.988905 | 0.995741 | -5.771   |
| AC124283.5  | -0.00974 | 3.043755 | -0.01333 | 0.989379 | 0.995741 | -5.77598 |
| AC107241.1  | -0.01119 | 4.628559 | -0.01498 | 0.988069 | 0.995741 | -6.14049 |
| AL445483.1  | -0.01077 | 4.697035 | -0.0134  | 0.989323 | 0.995741 | -6.21323 |
| AP000845.1  | -0.00404 | 4.988359 | -0.01441 | 0.988522 | 0.995741 | -6.32948 |
| AP001619.1  | -0.00576 | 5.465707 | -0.01377 | 0.989027 | 0.995741 | -6.48909 |
| AC137767.1  | 0.00298  | 6.642844 | 0.014037 | 0.988816 | 0.995741 | -6.81414 |
| AC009159.3  | 0.008547 | 5.589273 | 0.012977 | 0.989661 | 0.995758 | -6.53724 |
| SND1-IT1    | -0.00262 | 7.917242 | -0.01298 | 0.989661 | 0.995758 | -7.0717  |
| LINC02182   | -0.02114 | -0.27937 | -0.01196 | 0.990467 | 0.995959 | -5.47869 |
| AC245297.2  | 0.021058 | 0.10087  | 0.012356 | 0.990156 | 0.995959 | -5.49411 |
| AC022001.3  | -0.01655 | 1.785844 | -0.01173 | 0.990656 | 0.995959 | -5.60488 |
| AC141586.4  | 0.005112 | 4.231756 | 0.011805 | 0.990595 | 0.995959 | -6.05332 |
| U47924.3    | -0.00567 | 5.986707 | -0.01178 | 0.990611 | 0.995959 | -6.60164 |
| AC093799.1  | 0.003686 | 7.406734 | 0.012041 | 0.990406 | 0.995959 | -6.98639 |
| AC109309.1  | 0.021285 | -0.54572 | 0.011226 | 0.991056 | 0.995961 | -5.46864 |
| FBXO36-IT1  | -0.01549 | 2.467779 | -0.01134 | 0.990966 | 0.995961 | -5.70035 |
| AC142472.1  | 0.002616 | 6.762148 | 0.011375 | 0.990937 | 0.995961 | -6.83786 |
| AC006557.6  | -0.0103  | 4.96086  | -0.0109  | 0.991314 | 0.996027 | -6.24148 |
| AC090510.2  | 0.002391 | 6.362332 | 0.01081  | 0.991387 | 0.996027 | -6.75594 |
| AL137796.1  | -0.01133 | 3.329966 | -0.00981 | 0.992187 | 0.996615 | -5.84759 |
| AC022400.10 | 0.008926 | 4.963553 | 0.009743 | 0.992237 | 0.996615 | -6.31345 |
| INSYN1-AS1  | 0.015993 | -0.48027 | 0.009259 | 0.992623 | 0.99667  | -5.47125 |

|            |          |          |          |          |          |          |
|------------|----------|----------|----------|----------|----------|----------|
| AC016866.2 | -0.01324 | 1.545115 | -0.00884 | 0.992955 | 0.99667  | -5.57782 |
| AL359397.1 | 0.005342 | 5.338453 | 0.008985 | 0.992841 | 0.99667  | -6.45177 |
| AC027514.2 | 0.002916 | 6.509026 | 0.008956 | 0.992865 | 0.99667  | -6.81512 |
| SNHG9      | -0.0029  | 10.15205 | -0.00915 | 0.992709 | 0.99667  | -7.4221  |
| AL162731.1 | -0.01218 | -2.47097 | -0.00844 | 0.993278 | 0.996861 | -5.41095 |
| AL592148.3 | -0.00155 | 7.862447 | -0.00815 | 0.993507 | 0.996957 | -7.07012 |
| AC010336.1 | 0.003287 | 3.622344 | 0.007883 | 0.993719 | 0.997037 | -5.89359 |
| AC024267.3 | -0.00166 | 8.491337 | -0.00742 | 0.994087 | 0.997273 | -7.16204 |
| AP003071.3 | -0.01046 | 3.363274 | -0.00708 | 0.994361 | 0.997415 | -5.85672 |
| TTC3-AS1   | -0.00301 | 5.075703 | -0.00655 | 0.994779 | 0.997574 | -6.33648 |
| AC114488.1 | 0.006499 | 6.978129 | 0.006544 | 0.994786 | 0.997574 | -6.85429 |
| AL136146.2 | -0.00909 | 0.672051 | -0.00572 | 0.995444 | 0.997998 | -5.52319 |
| AC064836.2 | 0.006868 | 3.180601 | 0.00568  | 0.995474 | 0.997998 | -5.8227  |
| AC044802.1 | 0.001812 | 3.851569 | 0.005459 | 0.99565  | 0.998042 | -5.95969 |
| AC099684.2 | 0.006019 | 3.014245 | 0.004493 | 0.99642  | 0.998547 | -5.767   |
| CDC42-IT1  | 0.001872 | 6.79491  | 0.004598 | 0.996336 | 0.998547 | -6.85451 |
| AP003973.2 | -0.00513 | -1.05236 | -0.0029  | 0.997686 | 0.998616 | -5.45109 |
| AL139130.1 | -0.00328 | 0.22264  | -0.00378 | 0.996992 | 0.998616 | -5.50188 |
| AC015563.1 | 0.004136 | 3.427307 | 0.003433 | 0.997265 | 0.998616 | -5.82262 |
| AL356740.2 | 0.003849 | 4.212691 | 0.003207 | 0.997445 | 0.998616 | -6.03625 |
| AC108704.1 | 0.002993 | 4.333138 | 0.004187 | 0.996664 | 0.998616 | -6.11608 |
| AC068025.2 | 0.000923 | 6.335373 | 0.003493 | 0.997217 | 0.998616 | -6.72007 |
| AC012676.3 | 0.00109  | 6.378054 | 0.00321  | 0.997442 | 0.998616 | -6.73699 |
| AP002490.1 | 0.000917 | 6.533581 | 0.003952 | 0.996851 | 0.998616 | -6.80546 |
| AC009404.1 | 0.000785 | 7.042901 | 0.002922 | 0.997672 | 0.998616 | -6.9055  |
| AC009970.1 | -0.00344 | 3.818796 | -0.0026  | 0.997926 | 0.998724 | -5.97672 |
| AC107871.2 | 0.002506 | 2.781382 | 0.001944 | 0.998451 | 0.999116 | -5.71477 |
| AC012213.2 | 0.001017 | 3.140987 | 0.001776 | 0.998585 | 0.999117 | -5.79388 |
| AC117383.1 | -0.00179 | 2.510974 | -0.0012  | 0.999043 | 0.999442 | -5.6897  |
| AC010457.1 | 0.001055 | 1.116197 | 0.000724 | 0.999423 | 0.999585 | -5.56717 |
| AC090260.1 | -0.00043 | 3.525752 | -0.00069 | 0.999452 | 0.999585 | -5.86854 |
| AC022150.3 | -0.00014 | 0.049984 | #####    | 0.999931 | 0.999931 | -5.49033 |
