# Supplementary material for: Novel lncRNA Panel as for Prognosis in Esophageal Squamous Cell Carcinoma Based on ceRNA Network Mechanism
Source: Hindawi journal article supplement (doi:10.1155/2021/8020879), 2021-09-24
Supplement: f1 [file 8020879.f1.zip]

| source           | target    | corr        | type     |
|------------------|-----------|-------------|----------|
| 1 hsa-mir-30c-2  | GREM2     | 0.345782107 | mirna_pc |
| 2 hsa-mir-30c-2  | GPER      | 0.393185524 | mirna_pc |
| 3 hsa-mir-30c-2  | AFF3      | 0.348817679 | mirna_pc |
| 4 hsa-mir-30c-2  | KLF15     | 0.447470032 | mirna_pc |
| 5 hsa-mir-30c-2  | GPR133    | 0.440884329 | mirna_pc |
| 6 hsa-mir-30c-2  | KL        | 0.428828446 | mirna_pc |
| 7 hsa-mir-30c-2  | PTGER3    | 0.515474891 | mirna_pc |
| 8 hsa-mir-30c-2  | SCUBE2    | 0.388269303 | mirna_pc |
| 9 hsa-mir-30c-2  | ZNF471    | 0.406582651 | mirna_pc |
| 10 hsa-mir-30c-2 | GFRAL     | 0.360153625 | mirna_pc |
| 11 hsa-mir-30c-2 | GPR155    | 0.522009377 | mirna_pc |
| 12 hsa-mir-30c-2 | SLC16A7   | 0.501303104 | mirna_pc |
| 13 hsa-mir-30c-2 | PNPLA7    | 0.381760428 | mirna_pc |
| 14 hsa-mir-30c-2 | STX12     | 0.524790843 | mirna_pc |
| 15 hsa-mir-30c-2 | C3orf18   | 0.459782936 | mirna_pc |
| 16 hsa-mir-30c-2 | GPR146    | 0.445300045 | mirna_pc |
| 17 hsa-mir-30c-2 | RNF180    | 0.356489295 | mirna_pc |
| 18 hsa-mir-30c-2 | MLYCD     | 0.417197271 | mirna_pc |
| 19 hsa-mir-30c-2 | CRY2      | 0.419118621 | mirna_pc |
| 20 hsa-mir-30c-2 | ATOH8     | 0.337013018 | mirna_pc |
| 21 hsa-mir-30c-2 | RGMB      | 0.460560819 | mirna_pc |
| 22 hsa-mir-30c-2 | CGNL1     | 0.45561563  | mirna_pc |
| 23 hsa-mir-30c-2 | SLC25A4   | 0.47692882  | mirna_pc |
| 24 hsa-mir-30c-2 | HIF3A     | 0.301967695 | mirna_pc |
| 25 hsa-mir-30c-2 | C7orf41   | 0.346700842 | mirna_pc |
| 26 hsa-mir-30c-2 | FAM165B   | 0.533741465 | mirna_pc |
| 27 hsa-mir-30c-2 | DUSP19    | 0.587645702 | mirna_pc |
| 28 hsa-mir-30c-2 | RAB11FIP2 | 0.628478692 | mirna_pc |
| 29 hsa-mir-30c-2 | ZNF626    | 0.439173219 | mirna_pc |
| 30 hsa-mir-30c-2 | FAM189A2  | 0.391131283 | mirna_pc |
| 31 hsa-mir-30c-2 | KIT       | 0.441937935 | mirna_pc |
| 32 hsa-mir-30c-2 | ALDH6A1   | 0.518466456 | mirna_pc |
| 33 hsa-mir-30c-2 | TMEM161B  | 0.566518504 | mirna_pc |
| 34 hsa-mir-30c-2 | KIAA0427  | 0.405527335 | mirna_pc |
| 35 hsa-mir-30c-2 | LEPR      | 0.403652491 | mirna_pc |
| 36 hsa-mir-30c-2 | FAM54B    | 0.429824067 | mirna_pc |
| 37 hsa-mir-30c-2 | PRX       | 0.489463039 | mirna_pc |
| 38 hsa-mir-30c-2 | MITF      | 0.373244182 | mirna_pc |
| 39 hsa-mir-30c-2 | C22orf23  | 0.386263835 | mirna_pc |
| 40 hsa-mir-30c-2 | MFSD4     | 0.539936411 | mirna_pc |
| 41 hsa-mir-30c-2 | SIK2      | 0.467028408 | mirna_pc |
| 42 hsa-mir-30c-2 | EFHA2     | 0.361455268 | mirna_pc |
| 43 hsa-mir-30c-2 | ALAD      | 0.40977689  | mirna_pc |
| 44 hsa-mir-30c-2 | GNAZ      | 0.388659945 | mirna_pc |
| 45 hsa-mir-30c-2 | MT1G      | 0.424696576 | mirna_pc |
| 46 hsa-mir-30c-2 | LOC400043 | 0.533620487 | mirna_pc |
| 47 hsa-mir-30c-2 | CDH2      | 0.474473825 | mirna_pc |
| 48 hsa-mir-30c-2 | CKB       | 0.512211314 | mirna_pc |
| 49 hsa-mir-30c-2 | SPHAR     | 0.516275573 | mirna_pc |
| 50 hsa-mir-30c-2 | C8orf84   | 0.375765342 | mirna_pc |
| 51 hsa-mir-30c-2 | ACAT1     | 0.498210677 | mirna_pc |
| 52 hsa-mir-30c-2 | DPCR1     | 0.341823094 | mirna_pc |
| 53 hsa-mir-30c-2 | IPW       | 0.33706199  | mirna_pc |

|     |               |            |             |          |
|-----|---------------|------------|-------------|----------|
| 54  | hsa-mir-30c-2 | ACACB      | 0.362959965 | mirna_pc |
| 55  | hsa-mir-30c-2 | LIFR       | 0.559755953 | mirna_pc |
| 56  | hsa-mir-30c-2 | KIAA1191   | 0.428823514 | mirna_pc |
| 57  | hsa-mir-30c-2 | C14orf159  | 0.37034641  | mirna_pc |
| 58  | hsa-mir-30c-2 | ROR1       | 0.367670273 | mirna_pc |
| 59  | hsa-mir-30c-2 | C5orf53    | 0.304816972 | mirna_pc |
| 60  | hsa-mir-30c-2 | ACADSB     | 0.485336715 | mirna_pc |
| 61  | hsa-mir-30c-2 | CNTD1      | 0.527618945 | mirna_pc |
| 62  | hsa-mir-30c-2 | ARHGAP24   | 0.49084466  | mirna_pc |
| 63  | hsa-mir-30c-2 | GBGT1      | 0.469178421 | mirna_pc |
| 64  | hsa-mir-30c-2 | PAIP2B     | 0.448626026 | mirna_pc |
| 65  | hsa-mir-30c-2 | SYNJ2BP    | 0.457325815 | mirna_pc |
| 66  | hsa-mir-30c-2 | RIMS3      | 0.356350544 | mirna_pc |
| 67  | hsa-mir-30c-2 | CDHR3      | 0.320131329 | mirna_pc |
| 68  | hsa-mir-30c-2 | TMEM8B     | 0.318316816 | mirna_pc |
| 69  | hsa-mir-30c-2 | GHR        | 0.371965241 | mirna_pc |
| 70  | hsa-mir-30c-2 | ZSCAN18    | 0.338094199 | mirna_pc |
| 71  | hsa-mir-30c-2 | PXMP2      | 0.491774832 | mirna_pc |
| 72  | hsa-mir-30c-2 | VSIG2      | 0.531523166 | mirna_pc |
| 73  | hsa-mir-30c-2 | SIDT2      | 0.414970667 | mirna_pc |
| 74  | hsa-mir-30c-2 | DBT        | 0.576309591 | mirna_pc |
| 75  | hsa-mir-30c-2 | GTF2IRD2P1 | 0.47418851  | mirna_pc |
| 76  | hsa-mir-30c-2 | SECISBP2L  | 0.422330208 | mirna_pc |
| 77  | hsa-mir-30c-2 | TMEM220    | 0.454423754 | mirna_pc |
| 78  | hsa-mir-30c-2 | BTD        | 0.324294724 | mirna_pc |
| 79  | hsa-mir-30c-2 | PLCL1      | 0.313321652 | mirna_pc |
| 80  | hsa-mir-30c-2 | WASF3      | 0.369008781 | mirna_pc |
| 81  | hsa-mir-30c-2 | ERO1LB     | 0.539005886 | mirna_pc |
| 82  | hsa-mir-30c-2 | PBXIP1     | 0.413187024 | mirna_pc |
| 83  | hsa-mir-30c-2 | RAB27A     | 0.452507458 | mirna_pc |
| 84  | hsa-mir-30c-2 | ITGA9      | 0.360457256 | mirna_pc |
| 85  | hsa-mir-30c-2 | GTF2IRD2   | 0.45595427  | mirna_pc |
| 86  | hsa-mir-30c-2 | PBLD       | 0.514036818 | mirna_pc |
| 87  | hsa-mir-30c-2 | PCBD2      | 0.39885972  | mirna_pc |
| 88  | hsa-mir-30c-2 | ZNF415     | 0.392612894 | mirna_pc |
| 89  | hsa-mir-30c-2 | TSPYL4     | 0.477956872 | mirna_pc |
| 90  | hsa-mir-30c-2 | PDGFD      | 0.531244141 | mirna_pc |
| 91  | hsa-mir-30c-2 | AMT        | 0.395248839 | mirna_pc |
| 92  | hsa-mir-30c-2 | SNX1       | 0.360222511 | mirna_pc |
| 93  | hsa-mir-30c-2 | APLP1      | 0.432359319 | mirna_pc |
| 94  | hsa-mir-30c-2 | ACO2       | 0.325395164 | mirna_pc |
| 95  | hsa-mir-30c-2 | PSCA       | 0.476314557 | mirna_pc |
| 96  | hsa-mir-30c-2 | KLHDC1     | 0.419608104 | mirna_pc |
| 97  | hsa-mir-30c-2 | C6orf204   | 0.389285322 | mirna_pc |
| 98  | hsa-mir-30c-2 | C4orf34    | 0.364379672 | mirna_pc |
| 99  | hsa-mir-30c-2 | BDH2       | 0.457642619 | mirna_pc |
| 100 | hsa-mir-30c-2 | FABP3      | 0.377265806 | mirna_pc |
| 101 | hsa-mir-30c-2 | PIK3C2G    | 0.411104562 | mirna_pc |
| 102 | hsa-mir-30c-2 | ZMAT1      | 0.400022344 | mirna_pc |
| 103 | hsa-mir-30c-2 | TADA2B     | 0.393681063 | mirna_pc |
| 104 | hsa-mir-30c-2 | ZNF778     | 0.337960383 | mirna_pc |
| 105 | hsa-mir-30c-2 | ANO5       | 0.351850034 | mirna_pc |
| 106 | hsa-mir-30c-2 | RNF14      | 0.366274877 | mirna_pc |
| 107 | hsa-mir-30c-2 | ME3        | 0.487237873 | mirna_pc |

|     |               |           |             |          |
|-----|---------------|-----------|-------------|----------|
| 108 | hsa-mir-30c-2 | PPP1R9A   | 0.33848388  | mirna_pc |
| 109 | hsa-mir-30c-2 | UBL3      | 0.468271308 | mirna_pc |
| 110 | hsa-mir-30c-2 | TBC1D14   | 0.476163537 | mirna_pc |
| 111 | hsa-mir-30c-2 | ZNF470    | 0.477876569 | mirna_pc |
| 112 | hsa-mir-30c-2 | METTL7A   | 0.516303682 | mirna_pc |
| 113 | hsa-mir-30c-2 | SUCLG2    | 0.444785181 | mirna_pc |
| 114 | hsa-mir-30c-2 | TAPT1     | 0.481786187 | mirna_pc |
| 115 | hsa-mir-30c-2 | MYEF2     | 0.430298612 | mirna_pc |
| 116 | hsa-mir-30c-2 | IL11RA    | 0.321896769 | mirna_pc |
| 117 | hsa-mir-30c-2 | AUH       | 0.404497205 | mirna_pc |
| 118 | hsa-mir-30c-2 | RAB4A     | 0.302579883 | mirna_pc |
| 119 | hsa-mir-30c-2 | GTF2IRD2B | 0.349490026 | mirna_pc |
| 120 | hsa-mir-30c-2 | ZFP28     | 0.300635445 | mirna_pc |
| 121 | hsa-mir-30c-2 | FLJ33630  | 0.379937841 | mirna_pc |
| 122 | hsa-mir-30c-2 | ZNF542    | 0.437319016 | mirna_pc |
| 123 | hsa-mir-30c-2 | SYNE1     | 0.326476868 | mirna_pc |
| 124 | hsa-mir-30c-2 | ZNF844    | 0.415021478 | mirna_pc |
| 125 | hsa-mir-30c-2 | LDHD      | 0.362765253 | mirna_pc |
| 126 | hsa-mir-30c-2 | ATPAF1    | 0.390007772 | mirna_pc |
| 127 | hsa-mir-30c-2 | KCNAB1    | 0.418723653 | mirna_pc |
| 128 | hsa-mir-30c-2 | TPCN2     | 0.515799367 | mirna_pc |
| 129 | hsa-mir-30c-2 | PTPRN2    | 0.333323087 | mirna_pc |
| 130 | hsa-mir-30c-2 | TCEB3     | 0.422589822 | mirna_pc |
| 131 | hsa-mir-30c-2 | KIAA0141  | 0.345148238 | mirna_pc |
| 132 | hsa-mir-30c-2 | KIAA0494  | 0.369736726 | mirna_pc |
| 133 | hsa-mir-30c-2 | BRP44L    | 0.387234651 | mirna_pc |
| 134 | hsa-mir-30c-2 | KIAA0430  | 0.362456013 | mirna_pc |
| 135 | hsa-mir-30c-2 | BCKDHB    | 0.50215746  | mirna_pc |
| 136 | hsa-mir-30c-2 | UPRT      | 0.413044404 | mirna_pc |
| 137 | hsa-mir-30c-2 | PHF17     | 0.336124717 | mirna_pc |
| 138 | hsa-mir-30c-2 | MYST4     | 0.435265798 | mirna_pc |
| 139 | hsa-mir-30c-2 | XYLT2     | 0.469357869 | mirna_pc |
| 140 | hsa-mir-30c-2 | GIN1      | 0.447859085 | mirna_pc |
| 141 | hsa-mir-30c-2 | ZNF467    | 0.335048926 | mirna_pc |
| 142 | hsa-mir-30c-2 | MOSC2     | 0.462500131 | mirna_pc |
| 143 | hsa-mir-30c-2 | YPEL1     | 0.445210686 | mirna_pc |
| 144 | hsa-mir-30c-2 | PRKACB    | 0.466799019 | mirna_pc |
| 145 | hsa-mir-30c-2 | CYFIP2    | 0.505746229 | mirna_pc |
| 146 | hsa-mir-30c-2 | DGKD      | 0.50465806  | mirna_pc |
| 147 | hsa-mir-30c-2 | DEAF1     | 0.330445425 | mirna_pc |
| 148 | hsa-mir-30c-2 | GABRB3    | 0.34567543  | mirna_pc |
| 149 | hsa-mir-30c-2 | PECI      | 0.492568185 | mirna_pc |
| 150 | hsa-mir-30c-2 | PLA2G12A  | 0.405547992 | mirna_pc |
| 151 | hsa-mir-30c-2 | PDCD4     | 0.356017679 | mirna_pc |
| 152 | hsa-mir-30c-2 | CAPN6     | 0.390156777 | mirna_pc |
| 153 | hsa-mir-30c-2 | CCNI      | 0.328039386 | mirna_pc |
| 154 | hsa-mir-30c-2 | ZNF568    | 0.396387196 | mirna_pc |
| 155 | hsa-mir-30c-2 | USP53     | 0.367873334 | mirna_pc |
| 156 | hsa-mir-30c-2 | WIPF3     | 0.613175768 | mirna_pc |
| 157 | hsa-mir-30c-2 | CCDC149   | 0.447746579 | mirna_pc |
| 158 | hsa-mir-30c-2 | NTN4      | 0.417458572 | mirna_pc |
| 159 | hsa-mir-30c-2 | AK3       | 0.311516714 | mirna_pc |
| 160 | hsa-mir-30c-2 | RGNEF     | 0.372341874 | mirna_pc |
| 161 | hsa-mir-30c-2 | MOCS1     | 0.305365159 | mirna_pc |

|                   |           |                      |
|-------------------|-----------|----------------------|
| 162 hsa-mir-30c-2 | NRTN      | 0.442543835 mirna_pc |
| 163 hsa-mir-30c-2 | ACADM     | 0.397002669 mirna_pc |
| 164 hsa-mir-30c-2 | PRDM16    | 0.437900687 mirna_pc |
| 165 hsa-mir-30c-2 | TSC22D3   | 0.304942204 mirna_pc |
| 166 hsa-mir-30c-2 | PPM1K     | 0.349436945 mirna_pc |
| 167 hsa-mir-30c-2 | C14orf37  | 0.327909058 mirna_pc |
| 168 hsa-mir-30c-2 | SLC26A9   | 0.447701362 mirna_pc |
| 169 hsa-mir-30c-2 | VAMP2     | 0.333806682 mirna_pc |
| 170 hsa-mir-30c-2 | KIAA0495  | 0.500667728 mirna_pc |
| 171 hsa-mir-30c-2 | FZD4      | 0.382992564 mirna_pc |
| 172 hsa-mir-30c-2 | GLUL      | 0.422641566 mirna_pc |
| 173 hsa-mir-30c-2 | HERC1     | 0.332432084 mirna_pc |
| 174 hsa-mir-30c-2 | ZNF737    | 0.379648893 mirna_pc |
| 175 hsa-mir-30c-2 | SNRPN     | 0.313628723 mirna_pc |
| 176 hsa-mir-30c-2 | NUCB2     | 0.390313667 mirna_pc |
| 177 hsa-mir-30c-2 | BBS1      | 0.327982732 mirna_pc |
| 178 hsa-mir-30c-2 | FBXW11    | 0.33326379 mirna_pc  |
| 179 hsa-mir-30c-2 | ZNF229    | 0.363803524 mirna_pc |
| 180 hsa-mir-30c-2 | GMPR      | 0.465403013 mirna_pc |
| 181 hsa-mir-30c-2 | CTSF      | 0.391835404 mirna_pc |
| 182 hsa-mir-30c-2 | ZNF528    | 0.375400141 mirna_pc |
| 183 hsa-mir-30c-2 | SGSM3     | 0.351764543 mirna_pc |
| 184 hsa-mir-30c-2 | FBX09     | 0.324512153 mirna_pc |
| 185 hsa-mir-30c-2 | PGCP      | 0.377956201 mirna_pc |
| 186 hsa-mir-30c-2 | GABARAPL1 | 0.355613685 mirna_pc |
| 187 hsa-mir-30c-2 | PARD3B    | 0.368599393 mirna_pc |
| 188 hsa-mir-30c-2 | EIF2C4    | 0.359835226 mirna_pc |
| 189 hsa-mir-30c-2 | AKD1      | 0.403966228 mirna_pc |
| 190 hsa-mir-30c-2 | ZBTB3     | 0.378807556 mirna_pc |
| 191 hsa-mir-30c-2 | NAT15     | 0.418231423 mirna_pc |
| 192 hsa-mir-30c-2 | LRIG1     | 0.492343674 mirna_pc |
| 193 hsa-mir-30c-2 | LOC646471 | 0.363866766 mirna_pc |
| 194 hsa-mir-30c-2 | LOC729234 | 0.4593945 mirna_pc   |
| 195 hsa-mir-30c-2 | ZNF570    | 0.312762086 mirna_pc |
| 196 hsa-mir-30c-2 | SMARCD3   | 0.328897596 mirna_pc |
| 197 hsa-mir-30c-2 | CHRFAM7A  | 0.443525111 mirna_pc |
| 198 hsa-mir-30c-2 | NECAB3    | 0.371161916 mirna_pc |
| 199 hsa-mir-30c-2 | WDR37     | 0.333878251 mirna_pc |
| 200 hsa-mir-30c-2 | KCNJ11    | 0.477487852 mirna_pc |
| 201 hsa-mir-30c-2 | FAM174B   | 0.367990352 mirna_pc |
| 202 hsa-mir-30c-2 | PRKAG2    | 0.338332186 mirna_pc |
| 203 hsa-mir-30c-2 | FMO5      | 0.441299309 mirna_pc |
| 204 hsa-mir-30c-2 | DMXL1     | 0.318622281 mirna_pc |
| 205 hsa-mir-30c-2 | SACM1L    | 0.45593424 mirna_pc  |
| 206 hsa-mir-30c-2 | PGRMC2    | 0.314050475 mirna_pc |
| 207 hsa-mir-30c-2 | MAGI1     | 0.403355175 mirna_pc |
| 208 hsa-mir-30c-2 | ZNF57     | 0.350855728 mirna_pc |
| 209 hsa-mir-30c-2 | GPT2      | 0.450300501 mirna_pc |
| 210 hsa-mir-30c-2 | FGD4      | 0.452200187 mirna_pc |
| 211 hsa-mir-30c-2 | TBC1D9    | 0.41718752 mirna_pc  |
| 212 hsa-mir-30c-2 | MAGI3     | 0.339717731 mirna_pc |
| 213 hsa-mir-30c-2 | ZNF347    | 0.364579488 mirna_pc |
| 214 hsa-mir-30c-2 | C6orf225  | 0.320193809 mirna_pc |
| 215 hsa-mir-30c-2 | ZNF493    | 0.360920034 mirna_pc |



|                   |           |                      |
|-------------------|-----------|----------------------|
| 216 hsa-mir-30c-2 | TTC37     | 0.317318859 mirna_pc |
| 217 hsa-mir-30c-2 | ZNF85     | 0.498397897 mirna_pc |
| 218 hsa-mir-30c-2 | FAM13A    | 0.452109947 mirna_pc |
| 219 hsa-mir-30c-2 | NEK1      | 0.420765425 mirna_pc |
| 220 hsa-mir-30c-2 | PPAP2B    | 0.390697155 mirna_pc |
| 221 hsa-mir-30c-2 | NDUFA5    | 0.423029808 mirna_pc |
| 222 hsa-mir-30c-2 | ST5       | 0.313054259 mirna_pc |
| 223 hsa-mir-30c-2 | ATP6VOA2  | 0.436314846 mirna_pc |
| 224 hsa-mir-30c-2 | ZNF793    | 0.405952907 mirna_pc |
| 225 hsa-mir-30c-2 | ZNF429    | 0.446670189 mirna_pc |
| 226 hsa-mir-30c-2 | C18orf32  | 0.333608431 mirna_pc |
| 227 hsa-mir-30c-2 | SATL1     | 0.478756543 mirna_pc |
| 228 hsa-mir-30c-2 | CLIC6     | 0.556412576 mirna_pc |
| 229 hsa-mir-30c-2 | SLC4A2    | 0.489884004 mirna_pc |
| 230 hsa-mir-30c-2 | ZKSCAN3   | 0.45397748 mirna_pc  |
| 231 hsa-mir-30c-2 | ECHDC2    | 0.435802842 mirna_pc |
| 232 hsa-mir-30c-2 | NBAS      | 0.360354715 mirna_pc |
| 233 hsa-mir-30c-2 | DISP1     | 0.305839725 mirna_pc |
| 234 hsa-mir-30c-2 | SATB1     | 0.320653071 mirna_pc |
| 235 hsa-mir-30c-2 | TUBE1     | 0.433040515 mirna_pc |
| 236 hsa-mir-30c-2 | MTMR12    | 0.403626067 mirna_pc |
| 237 hsa-mir-30c-2 | SYTL3     | 0.391486877 mirna_pc |
| 238 hsa-mir-30c-2 | PTPRM     | 0.3313071 mirna_pc   |
| 239 hsa-mir-30c-2 | GCNT2     | 0.560343944 mirna_pc |
| 240 hsa-mir-30c-2 | FAM13B    | 0.303204394 mirna_pc |
| 241 hsa-mir-30c-2 | RNLS      | 0.309563944 mirna_pc |
| 242 hsa-mir-30c-2 | DNAJC27   | 0.395314975 mirna_pc |
| 243 hsa-mir-30c-2 | CACNB4    | 0.353153269 mirna_pc |
| 244 hsa-mir-30c-2 | LOC728743 | 0.34048126 mirna_pc  |
| 245 hsa-mir-30c-2 | CCNG1     | 0.385487578 mirna_pc |
| 246 hsa-mir-30c-2 | NR2F2     | 0.338996683 mirna_pc |
| 247 hsa-mir-30c-2 | ATXN7     | 0.305099444 mirna_pc |
| 248 hsa-mir-30c-2 | NOSTRIN   | 0.334403997 mirna_pc |
| 249 hsa-mir-30c-2 | DNAJC6    | 0.301702623 mirna_pc |
| 250 hsa-mir-30c-2 | RELL1     | 0.448386895 mirna_pc |
| 251 hsa-mir-30c-2 | INPP5J    | 0.36318238 mirna_pc  |
| 252 hsa-mir-30c-2 | NDUFS1    | 0.319400643 mirna_pc |
| 253 hsa-mir-30c-2 | TCEA3     | 0.359871035 mirna_pc |
| 254 hsa-mir-30c-2 | C17orf108 | 0.316792256 mirna_pc |
| 255 hsa-mir-30c-2 | COBLL1    | 0.381966755 mirna_pc |
| 256 hsa-mir-30c-2 | C5        | 0.422535906 mirna_pc |
| 257 hsa-mir-30c-2 | LRP2BP    | 0.373907926 mirna_pc |
| 258 hsa-mir-30c-2 | APOOL     | 0.341629355 mirna_pc |
| 259 hsa-mir-30c-2 | ZNF167    | 0.375415098 mirna_pc |
| 260 hsa-mir-30c-2 | SLC41A1   | 0.433226017 mirna_pc |
| 261 hsa-mir-30c-2 | ZMYND11   | 0.304105357 mirna_pc |
| 262 hsa-mir-30c-2 | LOC200030 | 0.520395268 mirna_pc |
| 263 hsa-mir-30c-2 | ZNF181    | 0.346056231 mirna_pc |
| 264 hsa-mir-30c-2 | SLC13A3   | 0.401398053 mirna_pc |
| 265 hsa-mir-30c-2 | ZNF43     | 0.449427125 mirna_pc |
| 266 hsa-mir-30c-2 | ZNF331    | 0.33683019 mirna_pc  |
| 267 hsa-mir-30c-2 | TMEM167B  | 0.349706761 mirna_pc |
| 268 hsa-mir-30c-2 | NFIX      | 0.330300888 mirna_pc |
| 269 hsa-mir-30c-2 | SLC25A16  | 0.35711655 mirna_pc  |

|     |               |           |             |          |
|-----|---------------|-----------|-------------|----------|
| 270 | hsa-mir-30c-2 | RERE      | 0.375739435 | mirna_pc |
| 271 | hsa-mir-30c-2 | HDHD2     | 0.323195977 | mirna_pc |
| 272 | hsa-mir-30c-2 | ZBED3     | 0.419757753 | mirna_pc |
| 273 | hsa-mir-30c-2 | ERN 1.00  | 0.308254536 | mirna_pc |
| 274 | hsa-mir-30c-2 | TMEM108   | 0.302488667 | mirna_pc |
| 275 | hsa-mir-30c-2 | MDH1      | 0.323785616 | mirna_pc |
| 276 | hsa-mir-30c-2 | EIF4EBP3  | 0.308432057 | mirna_pc |
| 277 | hsa-mir-30c-2 | C17orf48  | 0.302799162 | mirna_pc |
| 278 | hsa-mir-30c-2 | CCPG1     | 0.4389123   | mirna_pc |
| 279 | hsa-mir-30c-2 | ZSWIM6    | 0.384210773 | mirna_pc |
| 280 | hsa-mir-30c-2 | ZC3H6     | 0.410009258 | mirna_pc |
| 281 | hsa-mir-30c-2 | ZNF569    | 0.341050347 | mirna_pc |
| 282 | hsa-mir-30c-2 | ZNF10     | 0.363173595 | mirna_pc |
| 283 | hsa-mir-30c-2 | VSIG1     | 0.372726108 | mirna_pc |
| 284 | hsa-mir-30c-2 | SLC25A34  | 0.302696066 | mirna_pc |
| 285 | hsa-mir-30c-2 | LOC202181 | 0.425381937 | mirna_pc |
| 286 | hsa-mir-30c-2 | KIAA1109  | 0.318323425 | mirna_pc |
| 287 | hsa-mir-30c-2 | MON2      | 0.410227956 | mirna_pc |
| 288 | hsa-mir-30c-2 | HOMER2    | 0.321846594 | mirna_pc |
| 289 | hsa-mir-30c-2 | N6AMT1    | 0.348607405 | mirna_pc |
| 290 | hsa-mir-30c-2 | LARGE     | 0.343619051 | mirna_pc |
| 291 | hsa-mir-30c-2 | ZNF397    | 0.363029337 | mirna_pc |
| 292 | hsa-mir-30c-2 | PTTG1IP   | 0.30364393  | mirna_pc |
| 293 | hsa-mir-30c-2 | KIAA0895  | 0.479008082 | mirna_pc |
| 294 | hsa-mir-30c-2 | XKR8      | 0.355458184 | mirna_pc |
| 295 | hsa-mir-30c-2 | RHOU      | 0.420388209 | mirna_pc |
| 296 | hsa-mir-30c-2 | MTERFD3   | 0.439627126 | mirna_pc |
| 297 | hsa-mir-30c-2 | NNT       | 0.374783111 | mirna_pc |
| 298 | hsa-mir-30c-2 | CMTM4     | 0.45470274  | mirna_pc |
| 299 | hsa-mir-30c-2 | ARRDC4    | 0.302394679 | mirna_pc |
| 300 | hsa-mir-30c-2 | ARSK      | 0.328478995 | mirna_pc |
| 301 | hsa-mir-30c-2 | CLK4      | 0.462069555 | mirna_pc |
| 302 | hsa-mir-30c-2 | ZNF439    | 0.349002919 | mirna_pc |
| 303 | hsa-mir-30c-2 | MCEE      | 0.393993517 | mirna_pc |
| 304 | hsa-mir-30c-2 | DDX17     | 0.370648434 | mirna_pc |
| 305 | hsa-mir-30c-2 | FMOD      | 0.452363084 | mirna_pc |
| 306 | hsa-mir-30c-2 | SPATA6    | 0.332640269 | mirna_pc |
| 307 | hsa-mir-30c-2 | ATP8A1    | 0.355476031 | mirna_pc |
| 308 | hsa-mir-30c-2 | POLI      | 0.436469766 | mirna_pc |
| 309 | hsa-mir-30c-2 | SLC30A9   | 0.422974861 | mirna_pc |
| 310 | hsa-mir-30c-2 | RAB33B    | 0.38336787  | mirna_pc |
| 311 | hsa-mir-30c-2 | ZNF204P   | 0.357762388 | mirna_pc |
| 312 | hsa-mir-30c-2 | C12orf72  | 0.351503425 | mirna_pc |
| 313 | hsa-mir-30c-2 | ACSL3     | 0.406999416 | mirna_pc |
| 314 | hsa-mir-30c-2 | SLC44A2   | 0.31389489  | mirna_pc |
| 315 | hsa-mir-30c-2 | FXC1      | 0.357671019 | mirna_pc |
| 316 | hsa-mir-30c-2 | ZNF345    | 0.310225624 | mirna_pc |
| 317 | hsa-mir-30c-2 | C1orf69   | 0.306881895 | mirna_pc |
| 318 | hsa-mir-30c-2 | PRKAB2    | 0.302539532 | mirna_pc |
| 319 | hsa-mir-30c-2 | KIAA1958  | 0.362106825 | mirna_pc |
| 320 | hsa-mir-30c-2 | ARL 1.00  | 0.385565191 | mirna_pc |
| 321 | hsa-mir-30c-2 | AASS      | 0.370862597 | mirna_pc |
| 322 | hsa-mir-30c-2 | TTC3      | 0.406567728 | mirna_pc |
| 323 | hsa-mir-30c-2 | LOC286367 | 0.415577652 | mirna_pc |

|                   |           |                      |
|-------------------|-----------|----------------------|
| 324 hsa-mir-30c-2 | ZNF404    | 0.376536514 mirna_pc |
| 325 hsa-mir-30c-2 | C11orf54  | 0.319866043 mirna_pc |
| 326 hsa-mir-30c-2 | DCUN1D4   | 0.303713834 mirna_pc |
| 327 hsa-mir-30c-2 | ZNF880    | 0.300992854 mirna_pc |
| 328 hsa-mir-30c-2 | PAFAH2    | 0.34208414 mirna_pc  |
| 329 hsa-mir-30c-2 | AKR7A3    | 0.471332864 mirna_pc |
| 330 hsa-mir-30c-2 | ZNF649    | 0.313409486 mirna_pc |
| 331 hsa-mir-30c-2 | ENPP5     | 0.454504388 mirna_pc |
| 332 hsa-mir-30c-2 | ZNF862    | 0.311522858 mirna_pc |
| 333 hsa-mir-30c-2 | PEX7      | 0.36866152 mirna_pc  |
| 334 hsa-mir-30c-2 | ANKAR     | 0.453973609 mirna_pc |
| 335 hsa-mir-30c-2 | TMEM70    | 0.312021276 mirna_pc |
| 336 hsa-mir-30c-2 | TUBA8     | 0.316141043 mirna_pc |
| 337 hsa-mir-30c-2 | FAM13AOS  | 0.384865496 mirna_pc |
| 338 hsa-mir-30c-2 | ZBTB40    | 0.404168745 mirna_pc |
| 339 hsa-mir-30c-2 | SEMA3B    | 0.348339184 mirna_pc |
| 340 hsa-mir-30c-2 | HIPK2     | 0.316854694 mirna_pc |
| 341 hsa-mir-30c-2 | EIF2AK3   | 0.361238016 mirna_pc |
| 342 hsa-mir-30c-2 | AAK1      | 0.374814134 mirna_pc |
| 343 hsa-mir-30c-2 | RUNDC2C   | 0.302935108 mirna_pc |
| 344 hsa-mir-30c-2 | BTBD3     | 0.374616237 mirna_pc |
| 345 hsa-mir-30c-2 | CLCC1     | 0.519293962 mirna_pc |
| 346 hsa-mir-30c-2 | WBP1      | 0.435690695 mirna_pc |
| 347 hsa-mir-30c-2 | NEDD4L    | 0.384738965 mirna_pc |
| 348 hsa-mir-30c-2 | WDR60     | 0.433950705 mirna_pc |
| 349 hsa-mir-30c-2 | ZNF577    | 0.314380635 mirna_pc |
| 350 hsa-mir-30c-2 | SH2B1     | 0.335434194 mirna_pc |
| 351 hsa-mir-30c-2 | SPCS3     | 0.409089169 mirna_pc |
| 352 hsa-mir-30c-2 | IDH2      | 0.331017534 mirna_pc |
| 353 hsa-mir-30c-2 | C3orf19   | 0.310337285 mirna_pc |
| 354 hsa-mir-30c-2 | MEGF8     | 0.384637502 mirna_pc |
| 355 hsa-mir-30c-2 | FAM46C    | 0.352587909 mirna_pc |
| 356 hsa-mir-30c-2 | ADAMTS13  | 0.383544246 mirna_pc |
| 357 hsa-mir-30c-2 | TRIP11    | 0.313614636 mirna_pc |
| 358 hsa-mir-30c-2 | CCDC125   | 0.382746758 mirna_pc |
| 359 hsa-mir-30c-2 | GKAP1     | 0.348552751 mirna_pc |
| 360 hsa-mir-30c-2 | ZNF441    | 0.331621579 mirna_pc |
| 361 hsa-mir-30c-2 | KIAA0319L | 0.409460294 mirna_pc |
| 362 hsa-mir-30c-2 | ANXA10    | 0.381738414 mirna_pc |
| 363 hsa-mir-30c-2 | RAP1GAP2  | 0.394276693 mirna_pc |
| 364 hsa-mir-30c-2 | SSBP3     | 0.418599688 mirna_pc |
| 365 hsa-mir-30c-2 | ZNF254    | 0.365259931 mirna_pc |
| 366 hsa-mir-30c-2 | RUFY3     | 0.315792043 mirna_pc |
| 367 hsa-mir-30c-2 | GOLGA4    | 0.356254918 mirna_pc |
| 368 hsa-mir-30c-2 | ABCD3     | 0.376956763 mirna_pc |
| 369 hsa-mir-30c-2 | REPS2     | 0.337486588 mirna_pc |
| 370 hsa-mir-30c-2 | MT1F      | 0.409509795 mirna_pc |
| 371 hsa-mir-30c-2 | SLC2A11   | 0.314142086 mirna_pc |
| 372 hsa-mir-30c-2 | SENPF     | 0.379083705 mirna_pc |
| 373 hsa-mir-30c-2 | PCMTD1    | 0.371770858 mirna_pc |
| 374 hsa-mir-30c-2 | HADH      | 0.306976907 mirna_pc |
| 375 hsa-mir-30c-2 | SCMH1     | 0.410598746 mirna_pc |
| 376 hsa-mir-30c-2 | ZNF433    | 0.404553558 mirna_pc |
| 377 hsa-mir-30c-2 | PLCB4     | 0.313440198 mirna_pc |

|                   |              |                      |
|-------------------|--------------|----------------------|
| 378 hsa-mir-30c-2 | ZNF175       | 0.470380756 mirna_pc |
| 379 hsa-mir-30c-2 | ALS2CR8      | 0.371071618 mirna_pc |
| 380 hsa-mir-30c-2 | PXMP4        | 0.300067581 mirna_pc |
| 381 hsa-mir-30c-2 | LOC100132707 | 0.332638755 mirna_pc |
| 382 hsa-mir-30c-2 | ING3         | 0.473810536 mirna_pc |
| 383 hsa-mir-30c-2 | NUDT12       | 0.423670902 mirna_pc |
| 384 hsa-mir-30c-2 | THUMPD1      | 0.343940469 mirna_pc |
| 385 hsa-mir-30c-2 | CXCL17       | 0.382114256 mirna_pc |
| 386 hsa-mir-30c-2 | ADAM28       | 0.402189778 mirna_pc |
| 387 hsa-mir-30c-2 | C5orf33      | 0.411264595 mirna_pc |
| 388 hsa-mir-30c-2 | C17orf107    | 0.375758125 mirna_pc |
| 389 hsa-mir-30c-2 | ANKRD12      | 0.392155553 mirna_pc |
| 390 hsa-mir-30c-2 | GGA2         | 0.344234126 mirna_pc |
| 391 hsa-mir-30c-2 | TMEM56       | 0.455946778 mirna_pc |
| 392 hsa-mir-30c-2 | TSPAN12      | 0.316558899 mirna_pc |
| 393 hsa-mir-30c-2 | ZNF717       | 0.339862888 mirna_pc |
| 394 hsa-mir-30c-2 | CD302        | 0.303373031 mirna_pc |
| 395 hsa-mir-30c-2 | ZRANB1       | 0.312734739 mirna_pc |
| 396 hsa-mir-30c-2 | ZNF652       | 0.378063651 mirna_pc |
| 397 hsa-mir-30c-2 | LARP1B       | 0.4051721 mirna_pc   |
| 398 hsa-mir-30c-2 | ME2          | 0.342873725 mirna_pc |
| 399 hsa-mir-30c-2 | C5orf41      | 0.320340629 mirna_pc |
| 400 hsa-mir-30c-2 | PPP2R3A      | 0.311910901 mirna_pc |
| 401 hsa-mir-30c-2 | C10orf118    | 0.417864105 mirna_pc |
| 402 hsa-mir-30c-2 | TMEM170B     | 0.389604209 mirna_pc |
| 403 hsa-mir-30c-2 | ST3GAL6      | 0.362130259 mirna_pc |
| 404 hsa-mir-30c-2 | ELAC1        | 0.349323024 mirna_pc |
| 405 hsa-mir-30c-2 | ARID4A       | 0.387297879 mirna_pc |
| 406 hsa-mir-30c-2 | MAP9         | 0.434550652 mirna_pc |
| 407 hsa-mir-30c-2 | SMAD4        | 0.371851635 mirna_pc |
| 408 hsa-mir-30c-2 | BMPR1B       | 0.300331081 mirna_pc |
| 409 hsa-mir-30c-2 | IPP          | 0.325784663 mirna_pc |
| 410 hsa-mir-30c-2 | ZNF546       | 0.413939104 mirna_pc |
| 411 hsa-mir-30c-2 | STAM2        | 0.354211532 mirna_pc |
| 412 hsa-mir-30c-2 | C5orf32      | 0.403788006 mirna_pc |
| 413 hsa-mir-30c-2 | BBS4         | 0.337555722 mirna_pc |
| 414 hsa-mir-30c-2 | ABCA2        | 0.382508002 mirna_pc |
| 415 hsa-mir-30c-2 | ZNF33A       | 0.423629072 mirna_pc |
| 416 hsa-mir-30c-2 | CREBL2       | 0.371394477 mirna_pc |
| 417 hsa-mir-30c-2 | HERPUD1      | 0.34516648 mirna_pc  |
| 418 hsa-mir-30c-2 | ZNF33B       | 0.443485182 mirna_pc |
| 419 hsa-mir-30c-2 | CYP20A1      | 0.30203446 mirna_pc  |
| 420 hsa-mir-30c-2 | ANKRD43      | 0.372112461 mirna_pc |
| 421 hsa-mir-30c-2 | CHPT1        | 0.459213518 mirna_pc |
| 422 hsa-mir-30c-2 | RAP1GAP      | 0.425057352 mirna_pc |
| 423 hsa-mir-30c-2 | ZNF248       | 0.372382669 mirna_pc |
| 424 hsa-mir-30c-2 | ZNF420       | 0.367495484 mirna_pc |
| 425 hsa-mir-30c-2 | TUB          | 0.335437206 mirna_pc |
| 426 hsa-mir-30c-2 | RORC         | 0.310859141 mirna_pc |
| 427 hsa-mir-30c-2 | IGFBP2       | 0.320129769 mirna_pc |
| 428 hsa-mir-30c-2 | CABC1        | 0.443361602 mirna_pc |
| 429 hsa-mir-30c-2 | IKZF5        | 0.43258051 mirna_pc  |
| 430 hsa-mir-30c-2 | PWWP2A       | 0.365252721 mirna_pc |
| 431 hsa-mir-30c-2 | FAR1         | 0.333439407 mirna_pc |

|                   |              |                      |
|-------------------|--------------|----------------------|
| 432 hsa-mir-30c-2 | FAM8A1       | 0.302927557 mirna_pc |
| 433 hsa-mir-30c-2 | EIF4EBP2     | 0.308666588 mirna_pc |
| 434 hsa-mir-30c-2 | ZNF571       | 0.337673114 mirna_pc |
| 435 hsa-mir-30c-2 | PPFIBP2      | 0.307820243 mirna_pc |
| 436 hsa-mir-30c-2 | MTR          | 0.323582 mirna_pc    |
| 437 hsa-mir-30c-2 | USP16        | 0.332938134 mirna_pc |
| 438 hsa-mir-30c-2 | CBR4         | 0.343604621 mirna_pc |
| 439 hsa-mir-30c-2 | SARDH        | 0.336802781 mirna_pc |
| 440 hsa-mir-30c-2 | FGFR1        | 0.315703558 mirna_pc |
| 441 hsa-mir-30c-2 | RAPGEF2      | 0.350780434 mirna_pc |
| 442 hsa-mir-30c-2 | ERMAP        | 0.323276082 mirna_pc |
| 443 hsa-mir-30c-2 | TMBIM6       | 0.324764564 mirna_pc |
| 444 hsa-mir-30c-2 | CACHD1       | 0.427241653 mirna_pc |
| 445 hsa-mir-30c-2 | ZNF354C      | 0.339316039 mirna_pc |
| 446 hsa-mir-30c-2 | TATDN3       | 0.307405276 mirna_pc |
| 447 hsa-mir-30c-2 | GIGYF2       | 0.352979189 mirna_pc |
| 448 hsa-mir-30c-2 | PAPSS1       | 0.437216696 mirna_pc |
| 449 hsa-mir-30c-2 | LOC100130093 | 0.331264157 mirna_pc |
| 450 hsa-mir-30c-2 | FLJ39653     | 0.409781585 mirna_pc |
| 451 hsa-mir-30c-2 | TMX4         | 0.300948472 mirna_pc |
| 452 hsa-mir-30c-2 | PRLR         | 0.403982103 mirna_pc |
| 453 hsa-mir-30c-2 | APPL1        | 0.369396259 mirna_pc |
| 454 hsa-mir-30c-2 | RGL3         | 0.393309759 mirna_pc |
| 455 hsa-mir-30c-2 | ZNF280D      | 0.364145858 mirna_pc |
| 456 hsa-mir-30c-2 | B3GNT1       | 0.301114832 mirna_pc |
| 457 hsa-mir-30c-2 | MAP4K3       | 0.451635741 mirna_pc |
| 458 hsa-mir-30c-2 | ZNF24        | 0.333978758 mirna_pc |
| 459 hsa-mir-30c-2 | TTC18        | 0.385405997 mirna_pc |
| 460 hsa-mir-30c-2 | PER3         | 0.318049423 mirna_pc |
| 461 hsa-mir-30c-2 | CTBS         | 0.396362803 mirna_pc |
| 462 hsa-mir-30c-2 | ATRX         | 0.426008494 mirna_pc |
| 463 hsa-mir-30c-2 | ZFP112       | 0.363502785 mirna_pc |
| 464 hsa-mir-30c-2 | DET1         | 0.365278599 mirna_pc |
| 465 hsa-mir-30c-2 | ZNF573       | 0.300943685 mirna_pc |
| 466 hsa-mir-30c-2 | MCFD2        | 0.331055614 mirna_pc |
| 467 hsa-mir-30c-2 | ANO7         | 0.331835332 mirna_pc |
| 468 hsa-mir-30c-2 | ITSN2        | 0.38554167 mirna_pc  |
| 469 hsa-mir-30c-2 | AZGP1        | 0.310400054 mirna_pc |
| 470 hsa-mir-30c-2 | ACVR2A       | 0.550879653 mirna_pc |
| 471 hsa-mir-30c-2 | FAM107B      | 0.358289703 mirna_pc |
| 472 hsa-mir-30c-2 | PHF10        | 0.362780793 mirna_pc |
| 473 hsa-mir-30c-2 | CHD2         | 0.326837823 mirna_pc |
| 474 hsa-mir-30c-2 | TMEM86B      | 0.42970138 mirna_pc  |
| 475 hsa-mir-30c-2 | NAALADL2     | 0.315748682 mirna_pc |
| 476 hsa-mir-30c-2 | WDR19        | 0.430911439 mirna_pc |
| 477 hsa-mir-30c-2 | KCNQ1        | 0.499573514 mirna_pc |
| 478 hsa-mir-30c-2 | C4orf52      | 0.362004961 mirna_pc |
| 479 hsa-mir-30c-2 | ZBTB8A       | 0.316284996 mirna_pc |
| 480 hsa-mir-30c-2 | ZNF709       | 0.41161469 mirna_pc  |
| 481 hsa-mir-30c-2 | TFR2         | 0.417858514 mirna_pc |
| 482 hsa-mir-30c-2 | SEC63        | 0.348188535 mirna_pc |
| 483 hsa-mir-30c-2 | PLEKHM3      | 0.31361627 mirna_pc  |
| 484 hsa-mir-30c-2 | PHC1         | 0.370443644 mirna_pc |
| 485 hsa-mir-30c-2 | TMEM192      | 0.374307185 mirna_pc |

|                   |           |                      |
|-------------------|-----------|----------------------|
| 486 hsa-mir-30c-2 | MALAT1    | 0.462007613 mirna_pc |
| 487 hsa-mir-30c-2 | KIAA1147  | 0.331656027 mirna_pc |
| 488 hsa-mir-30c-2 | CCDC121   | 0.478077513 mirna_pc |
| 489 hsa-mir-30c-2 | SLC41A2   | 0.401779117 mirna_pc |
| 490 hsa-mir-30c-2 | ZNF449    | 0.391429331 mirna_pc |
| 491 hsa-mir-30c-2 | CTDSP2    | 0.335297511 mirna_pc |
| 492 hsa-mir-30c-2 | HSP90B1   | 0.32608454 mirna_pc  |
| 493 hsa-mir-30c-2 | ZNF445    | 0.31935259 mirna_pc  |
| 494 hsa-mir-30c-2 | C4orf41   | 0.322832981 mirna_pc |
| 495 hsa-mir-30c-2 | FAM168B   | 0.324424369 mirna_pc |
| 496 hsa-mir-30c-2 | ZNF615    | 0.333402969 mirna_pc |
| 497 hsa-mir-30c-2 | CDC14A    | 0.421066959 mirna_pc |
| 498 hsa-mir-30c-2 | C1orf26   | 0.425577578 mirna_pc |
| 499 hsa-mir-30c-2 | TCEANC    | 0.35678121 mirna_pc  |
| 500 hsa-mir-30c-2 | IQGAP2    | 0.356945985 mirna_pc |
| 501 hsa-mir-30c-2 | GOLGA6L10 | 0.329905057 mirna_pc |
| 502 hsa-mir-30c-2 | BRPF3     | 0.331438885 mirna_pc |
| 503 hsa-mir-30c-2 | WWC2      | 0.349712763 mirna_pc |
| 504 hsa-mir-30c-2 | SVIP      | 0.39745895 mirna_pc  |
| 505 hsa-mir-30c-2 | NBPF1     | 0.372378647 mirna_pc |
| 506 hsa-mir-30c-2 | PELI2     | 0.339871124 mirna_pc |
| 507 hsa-mir-30c-2 | ZNF221    | 0.363075772 mirna_pc |
| 508 hsa-mir-30c-2 | CPM       | 0.335898002 mirna_pc |
| 509 hsa-mir-30c-2 | LNX1      | 0.375099276 mirna_pc |
| 510 hsa-mir-30c-2 | SLC9A2    | 0.331638162 mirna_pc |
| 511 hsa-mir-30c-2 | SFRS18    | 0.460930306 mirna_pc |
| 512 hsa-mir-30c-2 | ACSS1     | 0.477041 mirna_pc    |
| 513 hsa-mir-30c-2 | CNOT6L    | 0.423772481 mirna_pc |
| 514 hsa-mir-30c-2 | DPY19L3   | 0.445513687 mirna_pc |
| 515 hsa-mir-30c-2 | NUDT13    | 0.370887092 mirna_pc |
| 516 hsa-mir-30c-2 | XBP1      | 0.316850329 mirna_pc |
| 517 hsa-mir-30c-2 | C1orf130  | 0.404272359 mirna_pc |
| 518 hsa-mir-30c-2 | PIK3C2A   | 0.364219413 mirna_pc |
| 519 hsa-mir-30c-2 | C5orf30   | 0.335814613 mirna_pc |
| 520 hsa-mir-30c-2 | ZNF3970S  | 0.388282797 mirna_pc |
| 521 hsa-mir-30c-2 | CCDC66    | 0.349755033 mirna_pc |
| 522 hsa-mir-30c-2 | FBXW8     | 0.343301479 mirna_pc |
| 523 hsa-mir-30c-2 | ZNF14     | 0.415437456 mirna_pc |
| 524 hsa-mir-30c-2 | ACSF2     | 0.371359073 mirna_pc |
| 525 hsa-mir-30c-2 | C5orf24   | 0.306030138 mirna_pc |
| 526 hsa-mir-30c-2 | C2orf86   | 0.51841273 mirna_pc  |
| 527 hsa-mir-30c-2 | B3GALNT1  | 0.515543643 mirna_pc |
| 528 hsa-mir-30c-2 | PPIEL     | 0.335820021 mirna_pc |
| 529 hsa-mir-30c-2 | FAM160B1  | 0.343038042 mirna_pc |
| 530 hsa-mir-30c-2 | CROCCL2   | 0.43424541 mirna_pc  |
| 531 hsa-mir-30c-2 | FNDC3A    | 0.380369163 mirna_pc |
| 532 hsa-mir-30c-2 | ZNF177    | 0.300732784 mirna_pc |
| 533 hsa-mir-30c-2 | ZNF549    | 0.394072227 mirna_pc |
| 534 hsa-mir-30c-2 | SEC31B    | 0.32518136 mirna_pc  |
| 535 hsa-mir-30c-2 | KIAA0776  | 0.350254351 mirna_pc |
| 536 hsa-mir-30c-2 | CSRP2BP   | 0.38469548 mirna_pc  |
| 537 hsa-mir-30c-2 | GATA6     | 0.317073253 mirna_pc |
| 538 hsa-mir-30c-2 | ZNF629    | 0.333840898 mirna_pc |
| 539 hsa-mir-30c-2 | RBPJ      | 0.38212217 mirna_pc  |

|     |               |          |             |          |
|-----|---------------|----------|-------------|----------|
| 540 | hsa-mir-30c-2 | KLF11    | 0.336785705 | mirna_pc |
| 541 | hsa-mir-30c-2 | ZNF704   | 0.300942849 | mirna_pc |
| 542 | hsa-mir-30c-2 | ZNF37A   | 0.403230703 | mirna_pc |
| 543 | hsa-mir-30c-2 | PDHX     | 0.322034529 | mirna_pc |
| 544 | hsa-mir-30c-2 | CDC14B   | 0.343061571 | mirna_pc |
| 545 | hsa-mir-30c-2 | ZNF552   | 0.418304415 | mirna_pc |
| 546 | hsa-mir-30c-2 | MFSD8    | 0.442716139 | mirna_pc |
| 547 | hsa-mir-30c-2 | THAP10   | 0.396312378 | mirna_pc |
| 548 | hsa-mir-30c-2 | CYP2R1   | 0.304474116 | mirna_pc |
| 549 | hsa-mir-30c-2 | BOD1L    | 0.448068343 | mirna_pc |
| 550 | hsa-mir-30c-2 | SPRN     | 0.309573097 | mirna_pc |
| 551 | hsa-mir-30c-2 | ZNF141   | 0.387099318 | mirna_pc |
| 552 | hsa-mir-30c-2 | ALDH1A1  | 0.50100311  | mirna_pc |
| 553 | hsa-mir-30c-2 | TRAPPC2  | 0.324914668 | mirna_pc |
| 554 | hsa-mir-30c-2 | HEATR5B  | 0.326455859 | mirna_pc |
| 555 | hsa-mir-30c-2 | CCDC55   | 0.317009865 | mirna_pc |
| 556 | hsa-mir-30c-2 | TRIM66   | 0.326957806 | mirna_pc |
| 557 | hsa-mir-30c-2 | NFIB     | 0.44030273  | mirna_pc |
| 558 | hsa-mir-30c-2 | FBXW7    | 0.330231432 | mirna_pc |
| 559 | hsa-mir-30c-2 | PREPL    | 0.327225499 | mirna_pc |
| 560 | hsa-mir-30c-2 | RSBN1    | 0.324839919 | mirna_pc |
| 561 | hsa-mir-30c-2 | ING5     | 0.371506364 | mirna_pc |
| 562 | hsa-mir-30c-2 | FAM73A   | 0.358446165 | mirna_pc |
| 563 | hsa-mir-30c-2 | MECOM    | 0.308287707 | mirna_pc |
| 564 | hsa-mir-30c-2 | METTL14  | 0.354170751 | mirna_pc |
| 565 | hsa-mir-30c-2 | ITFG2    | 0.358770265 | mirna_pc |
| 566 | hsa-mir-30c-2 | ZNF2     | 0.318301059 | mirna_pc |
| 567 | hsa-mir-30c-2 | AMN1     | 0.33923438  | mirna_pc |
| 568 | hsa-mir-30c-2 | DNASE1   | 0.341500292 | mirna_pc |
| 569 | hsa-mir-30c-2 | TTC17    | 0.331951661 | mirna_pc |
| 570 | hsa-mir-30c-2 | TMEM150C | 0.359099401 | mirna_pc |
| 571 | hsa-mir-30c-2 | GDAP2    | 0.322382568 | mirna_pc |
| 572 | hsa-mir-30c-2 | HPCAL1   | 0.331120071 | mirna_pc |
| 573 | hsa-mir-30c-2 | CADM1    | 0.435669261 | mirna_pc |
| 574 | hsa-mir-30c-2 | BRWD1    | 0.374579625 | mirna_pc |
| 575 | hsa-mir-30c-2 | SERPINI1 | 0.366023766 | mirna_pc |
| 576 | hsa-mir-30c-2 | C1orf115 | 0.387901551 | mirna_pc |
| 577 | hsa-mir-30c-2 | C11orf52 | 0.379111371 | mirna_pc |
| 578 | hsa-mir-30c-2 | CPAMD8   | 0.431061058 | mirna_pc |
| 579 | hsa-mir-30c-2 | SLC35E2  | 0.33505903  | mirna_pc |
| 580 | hsa-mir-30c-2 | SIRT1    | 0.34489433  | mirna_pc |
| 581 | hsa-mir-30c-2 | SALL2    | 0.303534708 | mirna_pc |
| 582 | hsa-mir-30c-2 | GRAMD1C  | 0.419891503 | mirna_pc |
| 583 | hsa-mir-30c-2 | PCM1     | 0.303718782 | mirna_pc |
| 584 | hsa-mir-30c-2 | AGAP5    | 0.397549977 | mirna_pc |
| 585 | hsa-mir-30c-2 | MOBK1A   | 0.433175273 | mirna_pc |
| 586 | hsa-mir-30c-2 | MAN1A2   | 0.320954092 | mirna_pc |
| 587 | hsa-mir-30c-2 | CA2      | 0.345445816 | mirna_pc |
| 588 | hsa-mir-30c-2 | ERBB2IP  | 0.314388929 | mirna_pc |
| 589 | hsa-mir-30c-2 | MTMR7    | 0.345304917 | mirna_pc |
| 590 | hsa-mir-30c-2 | ELF2     | 0.320645544 | mirna_pc |
| 591 | hsa-mir-30c-2 | FAM161A  | 0.473906563 | mirna_pc |
| 592 | hsa-mir-30c-2 | THAP2    | 0.329743536 | mirna_pc |
| 593 | hsa-mir-30c-2 | SLTM     | 0.418049421 | mirna_pc |

|     |               |           |             |          |
|-----|---------------|-----------|-------------|----------|
| 594 | hsa-mir-30c-2 | RAB17     | 0.460805785 | mirna_pc |
| 595 | hsa-mir-30c-2 | FAM193A   | 0.403234581 | mirna_pc |
| 596 | hsa-mir-30c-2 | ZNF606    | 0.441845508 | mirna_pc |
| 597 | hsa-mir-30c-2 | GPAM      | 0.356412036 | mirna_pc |
| 598 | hsa-mir-30c-2 | LOC651250 | 0.314420687 | mirna_pc |
| 599 | hsa-mir-30c-2 | OSBPL9    | 0.424023589 | mirna_pc |
| 600 | hsa-mir-30c-2 | NKTR      | 0.393228343 | mirna_pc |
| 601 | hsa-mir-30c-2 | ZNF236    | 0.319100562 | mirna_pc |
| 602 | hsa-mir-30c-2 | ZSCAN2    | 0.435511837 | mirna_pc |
| 603 | hsa-mir-30c-2 | IRAK1BP1  | 0.41267418  | mirna_pc |
| 604 | hsa-mir-30c-2 | SOS 1     | 0.377075573 | mirna_pc |
| 605 | hsa-mir-30c-2 | ZNF211    | 0.300963846 | mirna_pc |
| 606 | hsa-mir-30c-2 | LMO4      | 0.332884231 | mirna_pc |
| 607 | hsa-mir-30c-2 | CCNJL     | 0.382756892 | mirna_pc |
| 608 | hsa-mir-30c-2 | LRRN1     | 0.379352069 | mirna_pc |
| 609 | hsa-mir-30c-2 | SFRS12    | 0.477098734 | mirna_pc |
| 610 | hsa-mir-30c-2 | PPIP5K2   | 0.359865172 | mirna_pc |
| 611 | hsa-mir-30c-2 | ATXN7L3B  | 0.353460847 | mirna_pc |
| 612 | hsa-mir-30c-2 | HIST2H2BF | 0.307642173 | mirna_pc |
| 613 | hsa-mir-30c-2 | ZNF444    | 0.383144904 | mirna_pc |
| 614 | hsa-mir-30c-2 | C6orf120  | 0.323840398 | mirna_pc |
| 615 | hsa-mir-30c-2 | TMEM181   | 0.302211914 | mirna_pc |
| 616 | hsa-mir-30c-2 | ZNF23     | 0.309923568 | mirna_pc |
| 617 | hsa-mir-30c-2 | C2orf63   | 0.404095481 | mirna_pc |
| 618 | hsa-mir-30c-2 | CDKL3     | 0.300086961 | mirna_pc |
| 619 | hsa-mir-30c-2 | ZNF225    | 0.361818921 | mirna_pc |
| 620 | hsa-mir-30c-2 | ZNF160    | 0.421881399 | mirna_pc |
| 621 | hsa-mir-30c-2 | C11orf9   | 0.306064094 | mirna_pc |
| 622 | hsa-mir-30c-2 | SLC16A10  | 0.415233855 | mirna_pc |
| 623 | hsa-mir-30c-2 | EPOR      | 0.352501796 | mirna_pc |
| 624 | hsa-mir-30c-2 | ZNF136    | 0.393936706 | mirna_pc |
| 625 | hsa-mir-30c-2 | MDM4      | 0.384563656 | mirna_pc |
| 626 | hsa-mir-30c-2 | EPB41     | 0.334461975 | mirna_pc |
| 627 | hsa-mir-30c-2 | RHOBTB1   | 0.309207611 | mirna_pc |
| 628 | hsa-mir-30c-2 | C4orf29   | 0.39040582  | mirna_pc |
| 629 | hsa-mir-30c-2 | MED13L    | 0.322758876 | mirna_pc |
| 630 | hsa-mir-30c-2 | LOC144571 | 0.301885132 | mirna_pc |
| 631 | hsa-mir-30c-2 | SH3YL1    | 0.370060829 | mirna_pc |
| 632 | hsa-mir-30c-2 | EIF5A2    | 0.371447381 | mirna_pc |
| 633 | hsa-mir-30c-2 | MAN2A2    | 0.313037131 | mirna_pc |
| 634 | hsa-mir-30c-2 | ZNF451    | 0.317218811 | mirna_pc |
| 635 | hsa-mir-30c-2 | ZNF187    | 0.308638844 | mirna_pc |
| 636 | hsa-mir-30c-2 | KLRA1     | 0.426830254 | mirna_pc |
| 637 | hsa-mir-30c-2 | ZKSCAN2   | 0.374442466 | mirna_pc |
| 638 | hsa-mir-30c-2 | ZDBF2     | 0.368663063 | mirna_pc |
| 639 | hsa-mir-30c-2 | C12orf23  | 0.379896353 | mirna_pc |
| 640 | hsa-mir-30c-2 | RCOR3     | 0.357192583 | mirna_pc |
| 641 | hsa-mir-30c-2 | ZNF684    | 0.618949313 | mirna_pc |
| 642 | hsa-mir-30c-2 | GOLGA6L9  | 0.315899871 | mirna_pc |
| 643 | hsa-mir-30c-2 | ZNF192    | 0.378759494 | mirna_pc |
| 644 | hsa-mir-30c-2 | SLC25A30  | 0.326269605 | mirna_pc |
| 645 | hsa-mir-30c-2 | NSUN7     | 0.320358697 | mirna_pc |
| 646 | hsa-mir-30c-2 | ARHGAP18  | 0.40954792  | mirna_pc |
| 647 | hsa-mir-30c-2 | TMPRSS2   | 0.312125157 | mirna_pc |



|     |               |          |             |          |
|-----|---------------|----------|-------------|----------|
| 648 | hsa-mir-30c-2 | EPM2AIP1 | 0.32864323  | mirna_pc |
| 649 | hsa-mir-30c-2 | DNAJB9   | 0.30283078  | mirna_pc |
| 650 | hsa-mir-30c-2 | SEPSECS  | 0.392460304 | mirna_pc |
| 651 | hsa-mir-30c-2 | JMJD5    | 0.306296569 | mirna_pc |
| 652 | hsa-mir-30c-2 | FAM119B  | 0.30670898  | mirna_pc |
| 653 | hsa-mir-30c-2 | BMS1P4   | 0.330296879 | mirna_pc |
| 654 | hsa-mir-30c-2 | PTBP2    | 0.339037599 | mirna_pc |
| 655 | hsa-mir-30c-2 | PPCS     | 0.330532997 | mirna_pc |
| 656 | hsa-mir-30c-2 | ARFGEF2  | 0.36360846  | mirna_pc |
| 657 | hsa-mir-30c-2 | CENPC1   | 0.336171736 | mirna_pc |
| 658 | hsa-mir-30c-2 | SCAND2   | 0.339107822 | mirna_pc |
| 659 | hsa-mir-30c-2 | NAPEPLD  | 0.338334968 | mirna_pc |
| 660 | hsa-mir-30c-2 | USP34    | 0.323977555 | mirna_pc |
| 661 | hsa-mir-30c-2 | SNX25    | 0.303288926 | mirna_pc |
| 662 | hsa-mir-30c-2 | ZNF780B  | 0.362370206 | mirna_pc |
| 663 | hsa-mir-30c-2 | CA9      | 0.343513499 | mirna_pc |
| 664 | hsa-mir-30c-2 | ZNF630   | 0.319216172 | mirna_pc |
| 665 | hsa-mir-30c-2 | ZNF189   | 0.340902601 | mirna_pc |
| 666 | hsa-mir-30c-2 | ZNF605   | 0.324395404 | mirna_pc |
| 667 | hsa-mir-30c-2 | KDM6A    | 0.380120965 | mirna_pc |
| 668 | hsa-mir-30c-2 | SLC39A14 | 0.307961159 | mirna_pc |
| 669 | hsa-mir-30c-2 | SRBD1    | 0.337121767 | mirna_pc |
| 670 | hsa-mir-30c-2 | RASSF6   | 0.362135961 | mirna_pc |
| 671 | hsa-mir-30c-2 | RGPD3    | 0.341426303 | mirna_pc |
| 672 | hsa-mir-30c-2 | CCDC30   | 0.415564654 | mirna_pc |
| 673 | hsa-mir-30c-2 | RBM33    | 0.340272649 | mirna_pc |
| 674 | hsa-mir-30c-2 | LMAN1    | 0.428081113 | mirna_pc |
| 675 | hsa-mir-30c-2 | ZNF234   | 0.322798532 | mirna_pc |
| 676 | hsa-mir-30c-2 | ZNF230   | 0.305129999 | mirna_pc |
| 677 | hsa-mir-30c-2 | ANKRD26  | 0.40171558  | mirna_pc |
| 678 | hsa-mir-30c-2 | DPY19L4  | 0.43862056  | mirna_pc |
| 679 | hsa-mir-30c-2 | ZC3H7A   | 0.350175081 | mirna_pc |
| 680 | hsa-mir-30c-2 | RGPD4    | 0.302853454 | mirna_pc |
| 681 | hsa-mir-30c-2 | RG9MTD2  | 0.309603463 | mirna_pc |
| 682 | hsa-mir-30c-2 | GPBP1L1  | 0.35873685  | mirna_pc |
| 683 | hsa-mir-30c-2 | GOLGA2B  | 0.356102266 | mirna_pc |
| 684 | hsa-mir-30c-2 | ZNF253   | 0.385946266 | mirna_pc |
| 685 | hsa-mir-30c-2 | GABPA    | 0.339844061 | mirna_pc |
| 686 | hsa-mir-30c-2 | ZNF529   | 0.316571854 | mirna_pc |
| 687 | hsa-mir-30c-2 | ZFP161   | 0.302050164 | mirna_pc |
| 688 | hsa-mir-30c-2 | B4GALNT3 | 0.303392389 | mirna_pc |
| 689 | hsa-mir-30c-2 | RGPD6    | 0.399149756 | mirna_pc |
| 690 | hsa-mir-30c-2 | ZNF302   | 0.313517822 | mirna_pc |
| 691 | hsa-mir-30c-2 | ING4     | 0.319307155 | mirna_pc |
| 692 | hsa-mir-30c-2 | RFC1     | 0.445338997 | mirna_pc |
| 693 | hsa-mir-30c-2 | ZNF776   | 0.382084848 | mirna_pc |
| 694 | hsa-mir-30c-2 | ANKRD11  | 0.30377993  | mirna_pc |
| 695 | hsa-mir-30c-2 | ATN1     | 0.381467203 | mirna_pc |
| 696 | hsa-mir-30c-2 | CEP120   | 0.313283107 | mirna_pc |
| 697 | hsa-mir-30c-2 | ANKRD6   | 0.387460856 | mirna_pc |
| 698 | hsa-mir-30c-2 | TXNDC16  | 0.30069097  | mirna_pc |
| 699 | hsa-mir-30c-2 | ZNF566   | 0.354861473 | mirna_pc |
| 700 | hsa-mir-30c-2 | GGT7     | 0.392080057 | mirna_pc |
| 701 | hsa-mir-30c-2 | Clorf213 | 0.377322074 | mirna_pc |

|                   |           |                      |
|-------------------|-----------|----------------------|
| 702 hsa-mir-30c-2 | WDR52     | 0.320482934 mirna_pc |
| 703 hsa-mir-30c-2 | KIAA1324  | 0.301606071 mirna_pc |
| 704 hsa-mir-30c-2 | WWC1      | 0.304513765 mirna_pc |
| 705 hsa-mir-30c-2 | ZNF417    | 0.317096091 mirna_pc |
| 706 hsa-mir-30c-2 | ZBTB49    | 0.365527939 mirna_pc |
| 707 hsa-mir-30c-2 | ARNT2     | 0.325446092 mirna_pc |
| 708 hsa-mir-30c-2 | TMEM98    | 0.330192042 mirna_pc |
| 709 hsa-mir-30c-2 | ZNF700    | 0.30724741 mirna_pc  |
| 710 hsa-mir-30c-2 | ERP27     | 0.409571119 mirna_pc |
| 711 hsa-mir-30c-2 | CAPN13    | 0.422170891 mirna_pc |
| 712 hsa-mir-30c-2 | FUNDC1    | 0.338872436 mirna_pc |
| 713 hsa-mir-30c-2 | TTN       | 0.394178229 mirna_pc |
| 714 hsa-mir-30c-2 | ZNF84     | 0.439818385 mirna_pc |
| 715 hsa-mir-30c-2 | SLC25A36  | 0.432096381 mirna_pc |
| 716 hsa-mir-30c-2 | CRLS1     | 0.312649272 mirna_pc |
| 717 hsa-mir-30c-2 | RWDD3     | 0.408214649 mirna_pc |
| 718 hsa-mir-30c-2 | ARID4B    | 0.462177727 mirna_pc |
| 719 hsa-mir-30c-2 | DDX46     | 0.348022606 mirna_pc |
| 720 hsa-mir-30c-2 | ZDHC17    | 0.435064893 mirna_pc |
| 721 hsa-mir-30c-2 | ZNF599    | 0.363207838 mirna_pc |
| 722 hsa-mir-30c-2 | INPPL1    | 0.300526191 mirna_pc |
| 723 hsa-mir-30c-2 | UBN2      | 0.374260075 mirna_pc |
| 724 hsa-mir-30c-2 | ZFP14     | 0.327908199 mirna_pc |
| 725 hsa-mir-30c-2 | HUNK      | 0.316551445 mirna_pc |
| 726 hsa-mir-30c-2 | CHKA      | 0.326902048 mirna_pc |
| 727 hsa-mir-30c-2 | SFRS13A   | 0.310796055 mirna_pc |
| 728 hsa-mir-30c-2 | RBM47     | 0.325055445 mirna_pc |
| 729 hsa-mir-30c-2 | GPR125    | 0.390115766 mirna_pc |
| 730 hsa-mir-30c-2 | FIZ1      | 0.304707162 mirna_pc |
| 731 hsa-mir-30c-2 | Clorf203  | 0.308810166 mirna_pc |
| 732 hsa-mir-30c-2 | PIKFYVE   | 0.352181574 mirna_pc |
| 733 hsa-mir-30c-2 | LOC729799 | 0.345191995 mirna_pc |
| 734 hsa-mir-30c-2 | FNBP1L    | 0.390900548 mirna_pc |
| 735 hsa-mir-30c-2 | REST      | 0.341998131 mirna_pc |
| 736 hsa-mir-30c-2 | ACVR2B    | 0.421087473 mirna_pc |
| 737 hsa-mir-30c-2 | LOC91316  | 0.304075322 mirna_pc |
| 738 hsa-mir-30c-2 | POGZ      | 0.388939623 mirna_pc |
| 739 hsa-mir-30c-2 | FAM22A    | 0.336974859 mirna_pc |
| 740 hsa-mir-30c-2 | UBE2K     | 0.323076573 mirna_pc |
| 741 hsa-mir-30c-2 | WDR35     | 0.366774479 mirna_pc |
| 742 hsa-mir-30c-2 | ZNF514    | 0.309665232 mirna_pc |
| 743 hsa-mir-30c-2 | TTC14     | 0.352665524 mirna_pc |
| 744 hsa-mir-30c-2 | ANKRD22   | 0.328231509 mirna_pc |
| 745 hsa-mir-30c-2 | ZNF773    | 0.328934785 mirna_pc |
| 746 hsa-mir-30c-2 | AFTPH     | 0.37489143 mirna_pc  |
| 747 hsa-mir-30c-2 | TBC1D15   | 0.355204227 mirna_pc |
| 748 hsa-mir-30c-2 | Clorf27   | 0.307244443 mirna_pc |
| 749 hsa-mir-30c-2 | SUV420H1  | 0.37542259 mirna_pc  |
| 750 hsa-mir-30c-2 | FLJ10213  | 0.356246172 mirna_pc |
| 751 hsa-mir-30c-2 | CCDC144B  | 0.306462539 mirna_pc |
| 752 hsa-mir-30c-2 | CCAR1     | 0.304673927 mirna_pc |
| 753 hsa-mir-30c-2 | NEO1      | 0.310272573 mirna_pc |
| 754 hsa-mir-30c-2 | EDAR      | 0.312384378 mirna_pc |
| 755 hsa-mir-30c-2 | ZNF304    | 0.303392362 mirna_pc |

|                   |              |                      |
|-------------------|--------------|----------------------|
| 756 hsa-mir-30c-2 | ERLEC1       | 0.318464238 mirna_pc |
| 757 hsa-mir-30c-2 | USP33        | 0.359807556 mirna_pc |
| 758 hsa-mir-30c-2 | TIGD2        | 0.35439587 mirna_pc  |
| 759 hsa-mir-30c-2 | FOXJ3        | 0.4183486 mirna_pc   |
| 760 hsa-mir-30c-2 | ZNF548       | 0.310821965 mirna_pc |
| 761 hsa-mir-30c-2 | ZNF814       | 0.339953305 mirna_pc |
| 762 hsa-mir-30c-2 | ZNF180       | 0.360926814 mirna_pc |
| 763 hsa-mir-30c-2 | ZNF780A      | 0.327401491 mirna_pc |
| 764 hsa-mir-30c-2 | CDK18        | 0.363125641 mirna_pc |
| 765 hsa-mir-30c-2 | CCNT2        | 0.426531954 mirna_pc |
| 766 hsa-mir-30c-2 | ZNF214       | 0.335079773 mirna_pc |
| 767 hsa-mir-30c-2 | ZBTB10       | 0.332846019 mirna_pc |
| 768 hsa-mir-30c-2 | TMEM128      | 0.347910655 mirna_pc |
| 769 hsa-mir-30c-2 | GOLGA8B      | 0.370107003 mirna_pc |
| 770 hsa-mir-30c-2 | ZNF45        | 0.312242087 mirna_pc |
| 771 hsa-mir-30c-2 | TTC21B       | 0.311263231 mirna_pc |
| 772 hsa-mir-30c-2 | PPIG         | 0.359121143 mirna_pc |
| 773 hsa-mir-30c-2 | FNDC3B       | 0.307203878 mirna_pc |
| 774 hsa-mir-30c-2 | PRPF4B       | 0.364004801 mirna_pc |
| 775 hsa-mir-30c-2 | LRP6         | 0.436496901 mirna_pc |
| 776 hsa-mir-30c-2 | EXTL2        | 0.322182178 mirna_pc |
| 777 hsa-mir-30c-2 | DCP2         | 0.430405598 mirna_pc |
| 778 hsa-mir-30c-2 | PRKD3        | 0.330167662 mirna_pc |
| 779 hsa-mir-30c-2 | LOC100130557 | 0.44562779 mirna_pc  |
| 780 hsa-mir-30c-2 | TMTC4        | 0.311303719 mirna_pc |
| 781 hsa-mir-30c-2 | CTR9         | 0.330799402 mirna_pc |
| 782 hsa-mir-30c-2 | ADNP         | 0.309395359 mirna_pc |
| 783 hsa-mir-30c-2 | ARID1A       | 0.328942397 mirna_pc |
| 784 hsa-mir-30c-2 | IFT172       | 0.396927365 mirna_pc |
| 785 hsa-mir-30c-2 | CHD6         | 0.313992931 mirna_pc |
| 786 hsa-mir-30c-2 | CCDC76       | 0.460468898 mirna_pc |
| 787 hsa-mir-30c-2 | VASH2        | 0.396193623 mirna_pc |
| 788 hsa-mir-30c-2 | MCCC2        | 0.328968459 mirna_pc |
| 789 hsa-mir-30c-2 | ATG4C        | 0.327446797 mirna_pc |
| 790 hsa-mir-30c-2 | ZNF638       | 0.405053071 mirna_pc |
| 791 hsa-mir-30c-2 | GCA          | 0.362515755 mirna_pc |
| 792 hsa-mir-30c-2 | ZNF512       | 0.31899067 mirna_pc  |
| 793 hsa-mir-30c-2 | ALMS1        | 0.301808933 mirna_pc |
| 794 hsa-mir-30c-2 | ZCCHC4       | 0.300296244 mirna_pc |
| 795 hsa-mir-30c-2 | RAD52        | 0.333462645 mirna_pc |
| 796 hsa-mir-30c-2 | EMID1        | 0.389058506 mirna_pc |
| 797 hsa-mir-30c-2 | ZMYM4        | 0.373280567 mirna_pc |
| 798 hsa-mir-30c-2 | TRPM7        | 0.308907173 mirna_pc |
| 799 hsa-mir-30c-2 | BCLAF1       | 0.304184232 mirna_pc |
| 800 hsa-mir-30c-2 | ZNF227       | 0.314062855 mirna_pc |
| 801 hsa-mir-30c-2 | MOXD1        | 0.326067856 mirna_pc |
| 802 hsa-mir-30c-2 | THAP9        | 0.474489165 mirna_pc |
| 803 hsa-mir-30c-2 | PRPF38B      | 0.351039646 mirna_pc |
| 804 hsa-mir-30c-2 | CEP290       | 0.377643238 mirna_pc |
| 805 hsa-mir-30c-2 | PHF16        | 0.331761239 mirna_pc |
| 806 hsa-mir-30c-2 | LOC400657    | 0.31483651 mirna_pc  |
| 807 hsa-mir-30c-2 | ALG10B       | 0.475275696 mirna_pc |
| 808 hsa-mir-30c-2 | MNS1         | 0.322091288 mirna_pc |
| 809 hsa-mir-30c-2 | OFD1         | 0.397800859 mirna_pc |

|                   |            |                      |
|-------------------|------------|----------------------|
| 810 hsa-mir-30c-2 | TRUB1      | 0.326189442 mirna_pc |
| 811 hsa-mir-30c-2 | FAM71E1    | 0.300343269 mirna_pc |
| 812 hsa-mir-30c-2 | PDIK1L     | 0.316819579 mirna_pc |
| 813 hsa-mir-30c-2 | QRICH2     | 0.309226129 mirna_pc |
| 814 hsa-mir-30c-2 | PHTF1      | 0.338630637 mirna_pc |
| 815 hsa-mir-30c-2 | DCAF16     | 0.356729464 mirna_pc |
| 816 hsa-mir-30c-2 | C10orf137  | 0.37866099 mirna_pc  |
| 817 hsa-mir-30c-2 | HAUS3      | 0.379127953 mirna_pc |
| 818 hsa-mir-30c-2 | MANEA      | 0.332571372 mirna_pc |
| 819 hsa-mir-30c-2 | ZNF674     | 0.301908883 mirna_pc |
| 820 hsa-mir-30c-2 | ANGEL2     | 0.305657736 mirna_pc |
| 821 hsa-mir-30c-2 | GXYLT1     | 0.428185294 mirna_pc |
| 822 hsa-mir-30c-2 | N4BP2      | 0.339660622 mirna_pc |
| 823 hsa-mir-30c-2 | ZZZ3       | 0.315733166 mirna_pc |
| 824 hsa-mir-30c-2 | SFRS11     | 0.414220406 mirna_pc |
| 825 hsa-mir-30c-2 | SCAMP5     | 0.301232916 mirna_pc |
| 826 hsa-mir-30c-2 | TRO        | 0.331313261 mirna_pc |
| 827 hsa-mir-30c-2 | BBS10      | 0.30936891 mirna_pc  |
| 828 hsa-mir-30c-2 | ZBTB39     | 0.335448541 mirna_pc |
| 829 hsa-mir-30c-2 | NCRNA00201 | 0.39646204 mirna_pc  |
| 830 hsa-mir-30c-2 | C20orf12   | 0.389595996 mirna_pc |
| 831 hsa-mir-30c-2 | FANCF      | 0.354606238 mirna_pc |
| 832 hsa-mir-30c-2 | VPS54      | 0.412938868 mirna_pc |
| 833 hsa-mir-30c-2 | ZBTB24     | 0.346399559 mirna_pc |
| 834 hsa-mir-30c-2 | SPDYE8P    | 0.313642144 mirna_pc |
| 835 hsa-mir-30c-2 | NFYC       | 0.310687098 mirna_pc |
| 836 hsa-mir-30c-2 | Clorf9     | 0.361268055 mirna_pc |
| 837 hsa-mir-30c-2 | TSGA10     | 0.320691463 mirna_pc |
| 838 hsa-mir-30c-2 | PLGLB2     | 0.307623536 mirna_pc |
| 839 hsa-mir-30c-2 | SNX22      | 0.424559919 mirna_pc |
| 840 hsa-mir-30c-2 | FAM119A    | 0.301196603 mirna_pc |
| 841 hsa-mir-30c-2 | ZNF550     | 0.309703017 mirna_pc |
| 842 hsa-mir-30c-2 | ZNF567     | 0.307863796 mirna_pc |
| 843 hsa-mir-30c-2 | TIA1       | 0.404755024 mirna_pc |
| 844 hsa-mir-30c-2 | IL17RD     | 0.314923668 mirna_pc |
| 845 hsa-mir-30c-2 | ZNF664     | 0.341152745 mirna_pc |
| 846 hsa-mir-30c-2 | RBBP6      | 0.310063458 mirna_pc |
| 847 hsa-mir-30c-2 | NR1D2      | 0.309433786 mirna_pc |
| 848 hsa-mir-30c-2 | CSPP1      | 0.307605779 mirna_pc |
| 849 hsa-mir-30c-2 | SIKE1      | 0.316865568 mirna_pc |
| 850 hsa-mir-30c-2 | PPP4R2     | 0.307481613 mirna_pc |
| 851 hsa-mir-30c-2 | C2orf60    | 0.366324444 mirna_pc |
| 852 hsa-mir-30c-2 | GCFC1      | 0.348044358 mirna_pc |
| 853 hsa-mir-30c-2 | ZCCHC11    | 0.350230592 mirna_pc |
| 854 hsa-mir-30c-2 | ZNF644     | 0.344145959 mirna_pc |
| 855 hsa-mir-30c-2 | COL9A2     | 0.370417632 mirna_pc |
| 856 hsa-mir-30c-2 | MSTO2P     | 0.315235436 mirna_pc |
| 857 hsa-mir-30c-2 | COL9A3     | 0.32028086 mirna_pc  |
| 858 hsa-mir-30c-2 | MARVELD2   | 0.319160867 mirna_pc |
| 859 hsa-mir-30c-2 | ZNF680     | 0.360312237 mirna_pc |
| 860 hsa-mir-30c-2 | TRIM45     | 0.319920675 mirna_pc |
| 861 hsa-mir-30c-2 | ZDHHC23    | 0.373850354 mirna_pc |
| 862 hsa-mir-30c-2 | LYPD6B     | 0.368651673 mirna_pc |
| 863 hsa-mir-30c-2 | PHIP       | 0.305698109 mirna_pc |

|                   |           |                      |
|-------------------|-----------|----------------------|
| 864 hsa-mir-30c-2 | SMARCAD1  | 0.308965244 mirna_pc |
| 865 hsa-mir-30c-2 | ZBED5     | 0.324985412 mirna_pc |
| 866 hsa-mir-30c-2 | SFRS6     | 0.383191847 mirna_pc |
| 867 hsa-mir-30c-2 | SF3B1     | 0.300819481 mirna_pc |
| 868 hsa-mir-30c-2 | ZNF670    | 0.357865205 mirna_pc |
| 869 hsa-mir-30c-2 | C3orf33   | 0.3027623 mirna_pc   |
| 870 hsa-mir-30c-2 | GOLGA8A   | 0.34706593 mirna_pc  |
| 871 hsa-mir-30c-2 | SS18L1    | 0.324449828 mirna_pc |
| 872 hsa-mir-29c   | ZBTB16    | 0.320016049 mirna_pc |
| 873 hsa-mir-29c   | GREM2     | 0.555868654 mirna_pc |
| 874 hsa-mir-29c   | GPFR      | 0.583726277 mirna_pc |
| 875 hsa-mir-29c   | AFF3      | 0.460413439 mirna_pc |
| 876 hsa-mir-29c   | NCAM1     | 0.326145904 mirna_pc |
| 877 hsa-mir-29c   | FAM107A   | 0.393281777 mirna_pc |
| 878 hsa-mir-29c   | KLF15     | 0.492217896 mirna_pc |
| 879 hsa-mir-29c   | GPR133    | 0.50505869 mirna_pc  |
| 880 hsa-mir-29c   | CLEC3B    | 0.336456607 mirna_pc |
| 881 hsa-mir-29c   | GNG7      | 0.471803844 mirna_pc |
| 882 hsa-mir-29c   | KL        | 0.548500703 mirna_pc |
| 883 hsa-mir-29c   | PTGER3    | 0.595210907 mirna_pc |
| 884 hsa-mir-29c   | CAB39L    | 0.434328934 mirna_pc |
| 885 hsa-mir-29c   | ABCA8     | 0.369693545 mirna_pc |
| 886 hsa-mir-29c   | SCUBE2    | 0.529318243 mirna_pc |
| 887 hsa-mir-29c   | GPR155    | 0.594478924 mirna_pc |
| 888 hsa-mir-29c   | SLC16A7   | 0.57564101 mirna_pc  |
| 889 hsa-mir-29c   | CARNS1    | 0.327143846 mirna_pc |
| 890 hsa-mir-29c   | PNPLA7    | 0.566247255 mirna_pc |
| 891 hsa-mir-29c   | STX12     | 0.595417659 mirna_pc |
| 892 hsa-mir-29c   | C3orf18   | 0.534165323 mirna_pc |
| 893 hsa-mir-29c   | GPR146    | 0.607221169 mirna_pc |
| 894 hsa-mir-29c   | RNF180    | 0.445769553 mirna_pc |
| 895 hsa-mir-29c   | MLYCD     | 0.491488013 mirna_pc |
| 896 hsa-mir-29c   | CRY2      | 0.535768719 mirna_pc |
| 897 hsa-mir-29c   | PARK2     | 0.376105187 mirna_pc |
| 898 hsa-mir-29c   | ATOH8     | 0.345468886 mirna_pc |
| 899 hsa-mir-29c   | RGMB      | 0.554734411 mirna_pc |
| 900 hsa-mir-29c   | CGNL1     | 0.530665981 mirna_pc |
| 901 hsa-mir-29c   | SLC25A4   | 0.493032126 mirna_pc |
| 902 hsa-mir-29c   | C7orf41   | 0.390198384 mirna_pc |
| 903 hsa-mir-29c   | FAM165B   | 0.555906127 mirna_pc |
| 904 hsa-mir-29c   | DUSP19    | 0.541017171 mirna_pc |
| 905 hsa-mir-29c   | RAB11FIP2 | 0.584632069 mirna_pc |
| 906 hsa-mir-29c   | ZNF626    | 0.356311709 mirna_pc |
| 907 hsa-mir-29c   | FAM189A2  | 0.54581594 mirna_pc  |
| 908 hsa-mir-29c   | KIT       | 0.554818844 mirna_pc |
| 909 hsa-mir-29c   | RGS11     | 0.356808542 mirna_pc |
| 910 hsa-mir-29c   | ALDH6A1   | 0.58045491 mirna_pc  |
| 911 hsa-mir-29c   | C5orf4    | 0.339256143 mirna_pc |
| 912 hsa-mir-29c   | MMRN1     | 0.329125677 mirna_pc |
| 913 hsa-mir-29c   | GCNT4     | 0.489855452 mirna_pc |
| 914 hsa-mir-29c   | TMEM161B  | 0.569364379 mirna_pc |
| 915 hsa-mir-29c   | KIAA0427  | 0.406667941 mirna_pc |
| 916 hsa-mir-29c   | LEPR      | 0.562205198 mirna_pc |
| 917 hsa-mir-29c   | FAM54B    | 0.383158604 mirna_pc |

|                 |            |                      |
|-----------------|------------|----------------------|
| 918 hsa-mir-29c | PRX        | 0.42313842 mirna_pc  |
| 919 hsa-mir-29c | MITF       | 0.479065018 mirna_pc |
| 920 hsa-mir-29c | C22orf23   | 0.393600441 mirna_pc |
| 921 hsa-mir-29c | MFSD4      | 0.627291664 mirna_pc |
| 922 hsa-mir-29c | SIK2       | 0.500117003 mirna_pc |
| 923 hsa-mir-29c | EFHA2      | 0.348385172 mirna_pc |
| 924 hsa-mir-29c | ALAD       | 0.567333314 mirna_pc |
| 925 hsa-mir-29c | GNAZ       | 0.353565054 mirna_pc |
| 926 hsa-mir-29c | MT1G       | 0.530492449 mirna_pc |
| 927 hsa-mir-29c | LOC400043  | 0.612467043 mirna_pc |
| 928 hsa-mir-29c | PDE2A      | 0.321995612 mirna_pc |
| 929 hsa-mir-29c | CDH2       | 0.427784818 mirna_pc |
| 930 hsa-mir-29c | CKB        | 0.577812031 mirna_pc |
| 931 hsa-mir-29c | SPHAR      | 0.427798864 mirna_pc |
| 932 hsa-mir-29c | RAI2       | 0.315837874 mirna_pc |
| 933 hsa-mir-29c | ACAT1      | 0.440501606 mirna_pc |
| 934 hsa-mir-29c | DPCR1      | 0.390652731 mirna_pc |
| 935 hsa-mir-29c | ACACB      | 0.41731629 mirna_pc  |
| 936 hsa-mir-29c | LIFR       | 0.627703761 mirna_pc |
| 937 hsa-mir-29c | KIAA1191   | 0.389949628 mirna_pc |
| 938 hsa-mir-29c | C14orf159  | 0.537368186 mirna_pc |
| 939 hsa-mir-29c | ROR1       | 0.462059777 mirna_pc |
| 940 hsa-mir-29c | TCF21      | 0.350774051 mirna_pc |
| 941 hsa-mir-29c | SORBS2     | 0.439213528 mirna_pc |
| 942 hsa-mir-29c | C5orf53    | 0.394085982 mirna_pc |
| 943 hsa-mir-29c | ACADSB     | 0.419480402 mirna_pc |
| 944 hsa-mir-29c | SDPR       | 0.319733702 mirna_pc |
| 945 hsa-mir-29c | CBX7       | 0.33133598 mirna_pc  |
| 946 hsa-mir-29c | FAM149A    | 0.449877081 mirna_pc |
| 947 hsa-mir-29c | IL33       | 0.304912428 mirna_pc |
| 948 hsa-mir-29c | CNTD1      | 0.556832374 mirna_pc |
| 949 hsa-mir-29c | ARHGAP24   | 0.585284284 mirna_pc |
| 950 hsa-mir-29c | CPEB3      | 0.465365525 mirna_pc |
| 951 hsa-mir-29c | GBGT1      | 0.550910655 mirna_pc |
| 952 hsa-mir-29c | PAIP2B     | 0.56984705 mirna_pc  |
| 953 hsa-mir-29c | SYNJ2BP    | 0.464748579 mirna_pc |
| 954 hsa-mir-29c | GCOM1      | 0.385302317 mirna_pc |
| 955 hsa-mir-29c | CDHR3      | 0.327626225 mirna_pc |
| 956 hsa-mir-29c | TMEM8B     | 0.376642829 mirna_pc |
| 957 hsa-mir-29c | PXMP2      | 0.507035608 mirna_pc |
| 958 hsa-mir-29c | VSIG2      | 0.626619284 mirna_pc |
| 959 hsa-mir-29c | SIDT2      | 0.582144417 mirna_pc |
| 960 hsa-mir-29c | DBT        | 0.463277924 mirna_pc |
| 961 hsa-mir-29c | GTF2IRD2P1 | 0.426919712 mirna_pc |
| 962 hsa-mir-29c | SECISBP2L  | 0.531507408 mirna_pc |
| 963 hsa-mir-29c | TMEM220    | 0.456805974 mirna_pc |
| 964 hsa-mir-29c | BTD        | 0.469336048 mirna_pc |
| 965 hsa-mir-29c | ITM2A      | 0.33839105 mirna_pc  |
| 966 hsa-mir-29c | ERO1LB     | 0.579645407 mirna_pc |
| 967 hsa-mir-29c | PBXIP1     | 0.520385842 mirna_pc |
| 968 hsa-mir-29c | NICN1      | 0.475744121 mirna_pc |
| 969 hsa-mir-29c | SCNN1B     | 0.339146994 mirna_pc |
| 970 hsa-mir-29c | RAB27A     | 0.550453966 mirna_pc |
| 971 hsa-mir-29c | GTF2IRD2   | 0.446853049 mirna_pc |

|                  |          |                      |
|------------------|----------|----------------------|
| 972 hsa-mir-29c  | PBLD     | 0.594176113 mirna_pc |
| 973 hsa-mir-29c  | PCBD2    | 0.425996159 mirna_pc |
| 974 hsa-mir-29c  | ARHGEF37 | 0.443665784 mirna_pc |
| 975 hsa-mir-29c  | PTPN21   | 0.322207445 mirna_pc |
| 976 hsa-mir-29c  | TSPYL4   | 0.459899403 mirna_pc |
| 977 hsa-mir-29c  | PDGFD    | 0.631386103 mirna_pc |
| 978 hsa-mir-29c  | ETFDH    | 0.360104784 mirna_pc |
| 979 hsa-mir-29c  | AMT      | 0.418774617 mirna_pc |
| 980 hsa-mir-29c  | PCCA     | 0.380918372 mirna_pc |
| 981 hsa-mir-29c  | SNX1     | 0.328893371 mirna_pc |
| 982 hsa-mir-29c  | KANK3    | 0.502744268 mirna_pc |
| 983 hsa-mir-29c  | APLP1    | 0.534983344 mirna_pc |
| 984 hsa-mir-29c  | CIRBP    | 0.573225729 mirna_pc |
| 985 hsa-mir-29c  | ACO2     | 0.434863475 mirna_pc |
| 986 hsa-mir-29c  | PSCA     | 0.502517849 mirna_pc |
| 987 hsa-mir-29c  | KLHDC1   | 0.42407257 mirna_pc  |
| 988 hsa-mir-29c  | FAM63A   | 0.442811438 mirna_pc |
| 989 hsa-mir-29c  | C6orf204 | 0.52695534 mirna_pc  |
| 990 hsa-mir-29c  | TRIM3    | 0.323015187 mirna_pc |
| 991 hsa-mir-29c  | KAT2B    | 0.452792128 mirna_pc |
| 992 hsa-mir-29c  | C4orf34  | 0.46552224 mirna_pc  |
| 993 hsa-mir-29c  | BDH2     | 0.412289788 mirna_pc |
| 994 hsa-mir-29c  | FABP3    | 0.407142347 mirna_pc |
| 995 hsa-mir-29c  | RAF1     | 0.484913923 mirna_pc |
| 996 hsa-mir-29c  | PIK3C2G  | 0.604503925 mirna_pc |
| 997 hsa-mir-29c  | TENC1    | 0.31560939 mirna_pc  |
| 998 hsa-mir-29c  | ZMAT1    | 0.362217875 mirna_pc |
| 999 hsa-mir-29c  | HPGD     | 0.392128005 mirna_pc |
| 1000 hsa-mir-29c | TADA2B   | 0.477325188 mirna_pc |
| 1001 hsa-mir-29c | RNF14    | 0.321186158 mirna_pc |
| 1002 hsa-mir-29c | ME3      | 0.575540436 mirna_pc |
| 1003 hsa-mir-29c | C11orf67 | 0.413386764 mirna_pc |
| 1004 hsa-mir-29c | UBL3     | 0.59717587 mirna_pc  |
| 1005 hsa-mir-29c | TBC1D14  | 0.48366521 mirna_pc  |
| 1006 hsa-mir-29c | METTL7A  | 0.620406949 mirna_pc |
| 1007 hsa-mir-29c | SUCLG2   | 0.519485914 mirna_pc |
| 1008 hsa-mir-29c | TAPT1    | 0.377247692 mirna_pc |
| 1009 hsa-mir-29c | IL11RA   | 0.309038812 mirna_pc |
| 1010 hsa-mir-29c | AUH      | 0.481945183 mirna_pc |
| 1011 hsa-mir-29c | RAB4A    | 0.360100763 mirna_pc |
| 1012 hsa-mir-29c | POU6F1   | 0.335036845 mirna_pc |
| 1013 hsa-mir-29c | FLJ33630 | 0.413527121 mirna_pc |
| 1014 hsa-mir-29c | SYNE1    | 0.425782605 mirna_pc |
| 1015 hsa-mir-29c | ZNF844   | 0.412735414 mirna_pc |
| 1016 hsa-mir-29c | ANKDD1A  | 0.40302504 mirna_pc  |
| 1017 hsa-mir-29c | FOXN3    | 0.403451472 mirna_pc |
| 1018 hsa-mir-29c | LDHD     | 0.479350788 mirna_pc |
| 1019 hsa-mir-29c | PINK1    | 0.309359372 mirna_pc |
| 1020 hsa-mir-29c | ATPAF1   | 0.336607943 mirna_pc |
| 1021 hsa-mir-29c | KCNAB1   | 0.432119212 mirna_pc |
| 1022 hsa-mir-29c | TPCN2    | 0.395016821 mirna_pc |
| 1023 hsa-mir-29c | PTPRN2   | 0.516204955 mirna_pc |
| 1024 hsa-mir-29c | TCEB3    | 0.491999703 mirna_pc |
| 1025 hsa-mir-29c | KIAA0141 | 0.376964288 mirna_pc |

|                  |          |                      |
|------------------|----------|----------------------|
| 1026 hsa-mir-29c | KLF9     | 0.351628204 mirna_pc |
| 1027 hsa-mir-29c | FAM114A2 | 0.379039244 mirna_pc |
| 1028 hsa-mir-29c | KIAA0494 | 0.430701405 mirna_pc |
| 1029 hsa-mir-29c | CRBN     | 0.483395574 mirna_pc |
| 1030 hsa-mir-29c | BRP44L   | 0.419363414 mirna_pc |
| 1031 hsa-mir-29c | KIAA0430 | 0.417790311 mirna_pc |
| 1032 hsa-mir-29c | BCKDHB   | 0.438766478 mirna_pc |
| 1033 hsa-mir-29c | LAMA2    | 0.335366979 mirna_pc |
| 1034 hsa-mir-29c | UPRT     | 0.481051415 mirna_pc |
| 1035 hsa-mir-29c | PHF17    | 0.315784776 mirna_pc |
| 1036 hsa-mir-29c | ASAP3    | 0.407042771 mirna_pc |
| 1037 hsa-mir-29c | XYLT2    | 0.588142546 mirna_pc |
| 1038 hsa-mir-29c | GIN1     | 0.311023426 mirna_pc |
| 1039 hsa-mir-29c | PDE1A    | 0.363049467 mirna_pc |
| 1040 hsa-mir-29c | ZNF467   | 0.375436027 mirna_pc |
| 1041 hsa-mir-29c | LMF1     | 0.50954049 mirna_pc  |
| 1042 hsa-mir-29c | NFIC     | 0.321645092 mirna_pc |
| 1043 hsa-mir-29c | MOSC2    | 0.569824992 mirna_pc |
| 1044 hsa-mir-29c | PRKACB   | 0.584934863 mirna_pc |
| 1045 hsa-mir-29c | GPD1L    | 0.351015079 mirna_pc |
| 1046 hsa-mir-29c | TOX      | 0.389023377 mirna_pc |
| 1047 hsa-mir-29c | CLN8     | 0.388063904 mirna_pc |
| 1048 hsa-mir-29c | CYFIP2   | 0.599453052 mirna_pc |
| 1049 hsa-mir-29c | NR3C2    | 0.310826738 mirna_pc |
| 1050 hsa-mir-29c | DGKD     | 0.513688772 mirna_pc |
| 1051 hsa-mir-29c | DEAF1    | 0.44111345 mirna_pc  |
| 1052 hsa-mir-29c | FBXL5    | 0.386617825 mirna_pc |
| 1053 hsa-mir-29c | STK32B   | 0.307735221 mirna_pc |
| 1054 hsa-mir-29c | GABRB3   | 0.303630269 mirna_pc |
| 1055 hsa-mir-29c | PECI     | 0.542191459 mirna_pc |
| 1056 hsa-mir-29c | PMM1     | 0.329415295 mirna_pc |
| 1057 hsa-mir-29c | PDCD4    | 0.573029693 mirna_pc |
| 1058 hsa-mir-29c | CCNI     | 0.31481081 mirna_pc  |
| 1059 hsa-mir-29c | CALCOC01 | 0.360048312 mirna_pc |
| 1060 hsa-mir-29c | SOCS2    | 0.418884815 mirna_pc |
| 1061 hsa-mir-29c | USP53    | 0.350509816 mirna_pc |
| 1062 hsa-mir-29c | ACADS    | 0.403806415 mirna_pc |
| 1063 hsa-mir-29c | DEPDC6   | 0.463447991 mirna_pc |
| 1064 hsa-mir-29c | WIPF3    | 0.482410801 mirna_pc |
| 1065 hsa-mir-29c | SCNN1G   | 0.341841514 mirna_pc |
| 1066 hsa-mir-29c | CCDC149  | 0.513949216 mirna_pc |
| 1067 hsa-mir-29c | NTN4     | 0.57383372 mirna_pc  |
| 1068 hsa-mir-29c | AK3      | 0.39010557 mirna_pc  |
| 1069 hsa-mir-29c | RGNEF    | 0.499741369 mirna_pc |
| 1070 hsa-mir-29c | MOCS1    | 0.32927557 mirna_pc  |
| 1071 hsa-mir-29c | SLC25A26 | 0.422998931 mirna_pc |
| 1072 hsa-mir-29c | NRTN     | 0.415094348 mirna_pc |
| 1073 hsa-mir-29c | CCDC107  | 0.36349899 mirna_pc  |
| 1074 hsa-mir-29c | PRDM16   | 0.475065915 mirna_pc |
| 1075 hsa-mir-29c | TSC22D3  | 0.548569639 mirna_pc |
| 1076 hsa-mir-29c | CA5B     | 0.306086353 mirna_pc |
| 1077 hsa-mir-29c | PPMIK    | 0.512622102 mirna_pc |
| 1078 hsa-mir-29c | SLC26A9  | 0.555543572 mirna_pc |
| 1079 hsa-mir-29c | SLC4A4   | 0.333840494 mirna_pc |



|                  |           |                      |
|------------------|-----------|----------------------|
| 1080 hsa-mir-29c | PXK       | 0.364764052 mirna_pc |
| 1081 hsa-mir-29c | VAMP2     | 0.454472593 mirna_pc |
| 1082 hsa-mir-29c | FZD4      | 0.495766774 mirna_pc |
| 1083 hsa-mir-29c | GLUL      | 0.543944106 mirna_pc |
| 1084 hsa-mir-29c | XPA       | 0.328133388 mirna_pc |
| 1085 hsa-mir-29c | P2RX1     | 0.329734565 mirna_pc |
| 1086 hsa-mir-29c | HERC1     | 0.396370405 mirna_pc |
| 1087 hsa-mir-29c | ZNF737    | 0.316071005 mirna_pc |
| 1088 hsa-mir-29c | SNRPN     | 0.412870357 mirna_pc |
| 1089 hsa-mir-29c | NUCB2     | 0.465629269 mirna_pc |
| 1090 hsa-mir-29c | FBXW11    | 0.371835672 mirna_pc |
| 1091 hsa-mir-29c | GMPR      | 0.409584394 mirna_pc |
| 1092 hsa-mir-29c | KLHDC2    | 0.356466452 mirna_pc |
| 1093 hsa-mir-29c | CTSF      | 0.313831229 mirna_pc |
| 1094 hsa-mir-29c | SGSM3     | 0.562657663 mirna_pc |
| 1095 hsa-mir-29c | PGCP      | 0.416132477 mirna_pc |
| 1096 hsa-mir-29c | GABARAPL1 | 0.399098069 mirna_pc |
| 1097 hsa-mir-29c | PARD3B    | 0.376562546 mirna_pc |
| 1098 hsa-mir-29c | AKD1      | 0.392759685 mirna_pc |
| 1099 hsa-mir-29c | REC8      | 0.38102303 mirna_pc  |
| 1100 hsa-mir-29c | ZBTB3     | 0.368244829 mirna_pc |
| 1101 hsa-mir-29c | ASB16     | 0.398565484 mirna_pc |
| 1102 hsa-mir-29c | NISCH     | 0.303926318 mirna_pc |
| 1103 hsa-mir-29c | NAT15     | 0.465398285 mirna_pc |
| 1104 hsa-mir-29c | LRIG1     | 0.517785259 mirna_pc |
| 1105 hsa-mir-29c | LOC646471 | 0.342951654 mirna_pc |
| 1106 hsa-mir-29c | LOC729234 | 0.370133897 mirna_pc |
| 1107 hsa-mir-29c | RAPGEF3   | 0.351964599 mirna_pc |
| 1108 hsa-mir-29c | ZNF570    | 0.302048529 mirna_pc |
| 1109 hsa-mir-29c | APOD      | 0.321086697 mirna_pc |
| 1110 hsa-mir-29c | CHRFAM7A  | 0.422164585 mirna_pc |
| 1111 hsa-mir-29c | NECAB3    | 0.357396581 mirna_pc |
| 1112 hsa-mir-29c | WDR37     | 0.354490322 mirna_pc |
| 1113 hsa-mir-29c | KCNJ11    | 0.469905127 mirna_pc |
| 1114 hsa-mir-29c | TTC28     | 0.302119219 mirna_pc |
| 1115 hsa-mir-29c | ISCU      | 0.456596581 mirna_pc |
| 1116 hsa-mir-29c | FAM174B   | 0.51679973 mirna_pc  |
| 1117 hsa-mir-29c | FBXL17    | 0.36218205 mirna_pc  |
| 1118 hsa-mir-29c | PDE7B     | 0.352569128 mirna_pc |
| 1119 hsa-mir-29c | STARD8    | 0.395459812 mirna_pc |
| 1120 hsa-mir-29c | FMO5      | 0.544832444 mirna_pc |
| 1121 hsa-mir-29c | DMXL1     | 0.4149992 mirna_pc   |
| 1122 hsa-mir-29c | SACM1L    | 0.349582722 mirna_pc |
| 1123 hsa-mir-29c | PGRMC2    | 0.322745679 mirna_pc |
| 1124 hsa-mir-29c | MAGI1     | 0.497658457 mirna_pc |
| 1125 hsa-mir-29c | ZNF57     | 0.489546536 mirna_pc |
| 1126 hsa-mir-29c | EPB41L4A  | 0.51591815 mirna_pc  |
| 1127 hsa-mir-29c | FEM1C     | 0.32130003 mirna_pc  |
| 1128 hsa-mir-29c | GPT2      | 0.567847244 mirna_pc |
| 1129 hsa-mir-29c | FGD4      | 0.551781613 mirna_pc |
| 1130 hsa-mir-29c | TBC1D9    | 0.486722857 mirna_pc |
| 1131 hsa-mir-29c | SESN1     | 0.339348904 mirna_pc |
| 1132 hsa-mir-29c | ACADVL    | 0.324976268 mirna_pc |
| 1133 hsa-mir-29c | MAGI3     | 0.40407165 mirna_pc  |

|                  |           |                      |
|------------------|-----------|----------------------|
| 1134 hsa-mir-29c | SLC25A42  | 0.315314065 mirna_pc |
| 1135 hsa-mir-29c | PRKAB1    | 0.502317639 mirna_pc |
| 1136 hsa-mir-29c | FZD8      | 0.334020995 mirna_pc |
| 1137 hsa-mir-29c | KIAA0513  | 0.385763141 mirna_pc |
| 1138 hsa-mir-29c | ZNF493    | 0.359943098 mirna_pc |
| 1139 hsa-mir-29c | TTC37     | 0.344088459 mirna_pc |
| 1140 hsa-mir-29c | ELL2      | 0.364311187 mirna_pc |
| 1141 hsa-mir-29c | ZNF85     | 0.44834046 mirna_pc  |
| 1142 hsa-mir-29c | FAM13A    | 0.456114524 mirna_pc |
| 1143 hsa-mir-29c | CMAH      | 0.338828929 mirna_pc |
| 1144 hsa-mir-29c | SIK3      | 0.379827595 mirna_pc |
| 1145 hsa-mir-29c | CYB5D2    | 0.377067913 mirna_pc |
| 1146 hsa-mir-29c | RBM5      | 0.30914602 mirna_pc  |
| 1147 hsa-mir-29c | PPAP2B    | 0.348932115 mirna_pc |
| 1148 hsa-mir-29c | ST5       | 0.308919614 mirna_pc |
| 1149 hsa-mir-29c | SEC14L1   | 0.471323668 mirna_pc |
| 1150 hsa-mir-29c | ZNF429    | 0.404037079 mirna_pc |
| 1151 hsa-mir-29c | C18orf32  | 0.33085711 mirna_pc  |
| 1152 hsa-mir-29c | FRY       | 0.312339372 mirna_pc |
| 1153 hsa-mir-29c | DMRTA1    | 0.492657538 mirna_pc |
| 1154 hsa-mir-29c | CLIC6     | 0.609274256 mirna_pc |
| 1155 hsa-mir-29c | SLC4A2    | 0.444472563 mirna_pc |
| 1156 hsa-mir-29c | VPS39     | 0.316070847 mirna_pc |
| 1157 hsa-mir-29c | ECHDC2    | 0.418252683 mirna_pc |
| 1158 hsa-mir-29c | C9orf130  | 0.325257278 mirna_pc |
| 1159 hsa-mir-29c | NBAS      | 0.304994814 mirna_pc |
| 1160 hsa-mir-29c | SATB1     | 0.358479068 mirna_pc |
| 1161 hsa-mir-29c | MTMR12    | 0.374249899 mirna_pc |
| 1162 hsa-mir-29c | SYTL3     | 0.400068401 mirna_pc |
| 1163 hsa-mir-29c | PTPRM     | 0.366190905 mirna_pc |
| 1164 hsa-mir-29c | CCDC159   | 0.507818485 mirna_pc |
| 1165 hsa-mir-29c | TM7SF2    | 0.462053645 mirna_pc |
| 1166 hsa-mir-29c | GCNT2     | 0.416887454 mirna_pc |
| 1167 hsa-mir-29c | PER1      | 0.302052055 mirna_pc |
| 1168 hsa-mir-29c | FOXO3     | 0.347113551 mirna_pc |
| 1169 hsa-mir-29c | RNLS      | 0.463679059 mirna_pc |
| 1170 hsa-mir-29c | PTGDS     | 0.399172581 mirna_pc |
| 1171 hsa-mir-29c | C22orf32  | 0.400064592 mirna_pc |
| 1172 hsa-mir-29c | LOC728743 | 0.439218096 mirna_pc |
| 1173 hsa-mir-29c | CCNG1     | 0.370806753 mirna_pc |
| 1174 hsa-mir-29c | NOSTRIN   | 0.416752072 mirna_pc |
| 1175 hsa-mir-29c | RELL1     | 0.314042441 mirna_pc |
| 1176 hsa-mir-29c | INPP5J    | 0.445958466 mirna_pc |
| 1177 hsa-mir-29c | ZFYVE28   | 0.369004849 mirna_pc |
| 1178 hsa-mir-29c | TCEA3     | 0.479104698 mirna_pc |
| 1179 hsa-mir-29c | ANAPC16   | 0.325551856 mirna_pc |
| 1180 hsa-mir-29c | COBLL1    | 0.514922117 mirna_pc |
| 1181 hsa-mir-29c | SNX18     | 0.332470267 mirna_pc |
| 1182 hsa-mir-29c | ERGIC1    | 0.30854332 mirna_pc  |
| 1183 hsa-mir-29c | CCL21     | 0.314351961 mirna_pc |
| 1184 hsa-mir-29c | SLC41A1   | 0.413549284 mirna_pc |
| 1185 hsa-mir-29c | LOC200030 | 0.374022885 mirna_pc |
| 1186 hsa-mir-29c | SLC13A3   | 0.456306341 mirna_pc |
| 1187 hsa-mir-29c | ZNF43     | 0.312252474 mirna_pc |

|                  |          |                      |
|------------------|----------|----------------------|
| 1188 hsa-mir-29c | GNAQ     | 0.323312248 mirna_pc |
| 1189 hsa-mir-29c | ZBED3    | 0.378537306 mirna_pc |
| 1190 hsa-mir-29c | ERN 1.00 | 0.457572428 mirna_pc |
| 1191 hsa-mir-29c | MDH1     | 0.330019386 mirna_pc |
| 1192 hsa-mir-29c | CPEB4    | 0.345636507 mirna_pc |
| 1193 hsa-mir-29c | GIPC3    | 0.318331267 mirna_pc |
| 1194 hsa-mir-29c | EIF4EBP3 | 0.491046944 mirna_pc |
| 1195 hsa-mir-29c | C17orf48 | 0.447218581 mirna_pc |
| 1196 hsa-mir-29c | CCPG1    | 0.543794875 mirna_pc |
| 1197 hsa-mir-29c | SHE      | 0.307190915 mirna_pc |
| 1198 hsa-mir-29c | VSIG1    | 0.412826745 mirna_pc |
| 1199 hsa-mir-29c | LTF      | 0.391537092 mirna_pc |
| 1200 hsa-mir-29c | GALNT12  | 0.386503603 mirna_pc |
| 1201 hsa-mir-29c | RASGRP2  | 0.383871903 mirna_pc |
| 1202 hsa-mir-29c | TMTC2    | 0.353150627 mirna_pc |
| 1203 hsa-mir-29c | IL6ST    | 0.319517931 mirna_pc |
| 1204 hsa-mir-29c | HOMER2   | 0.500060704 mirna_pc |
| 1205 hsa-mir-29c | LARGE    | 0.338751223 mirna_pc |
| 1206 hsa-mir-29c | PTTG1IP  | 0.326082648 mirna_pc |
| 1207 hsa-mir-29c | KIAA0895 | 0.39184142 mirna_pc  |
| 1208 hsa-mir-29c | XKR8     | 0.423067251 mirna_pc |
| 1209 hsa-mir-29c | RHOU     | 0.382276769 mirna_pc |
| 1210 hsa-mir-29c | RNASE4   | 0.398623971 mirna_pc |
| 1211 hsa-mir-29c | REEP5    | 0.425222101 mirna_pc |
| 1212 hsa-mir-29c | ATP5J    | 0.301346649 mirna_pc |
| 1213 hsa-mir-29c | NNT      | 0.329530926 mirna_pc |
| 1214 hsa-mir-29c | CMTM4    | 0.358881371 mirna_pc |
| 1215 hsa-mir-29c | ARRDC4   | 0.330368168 mirna_pc |
| 1216 hsa-mir-29c | TXNIP    | 0.313330233 mirna_pc |
| 1217 hsa-mir-29c | TPSB2    | 0.401775329 mirna_pc |
| 1218 hsa-mir-29c | MCEE     | 0.458461689 mirna_pc |
| 1219 hsa-mir-29c | DHRS7    | 0.327380981 mirna_pc |
| 1220 hsa-mir-29c | FMOD     | 0.581879273 mirna_pc |
| 1221 hsa-mir-29c | TEK      | 0.344316322 mirna_pc |
| 1222 hsa-mir-29c | ATP8A1   | 0.452844256 mirna_pc |
| 1223 hsa-mir-29c | ECHDC3   | 0.318492833 mirna_pc |
| 1224 hsa-mir-29c | LDB2     | 0.318922153 mirna_pc |
| 1225 hsa-mir-29c | LRRC70   | 0.406505901 mirna_pc |
| 1226 hsa-mir-29c | NRIP2    | 0.392461175 mirna_pc |
| 1227 hsa-mir-29c | SYBU     | 0.360609818 mirna_pc |
| 1228 hsa-mir-29c | CRADD    | 0.344149794 mirna_pc |
| 1229 hsa-mir-29c | KIAA1370 | 0.422561654 mirna_pc |
| 1230 hsa-mir-29c | KALRN    | 0.309882694 mirna_pc |
| 1231 hsa-mir-29c | HMGCL    | 0.336276904 mirna_pc |
| 1232 hsa-mir-29c | C12orf72 | 0.310745363 mirna_pc |
| 1233 hsa-mir-29c | ACSL3    | 0.412641801 mirna_pc |
| 1234 hsa-mir-29c | SLC44A2  | 0.416978686 mirna_pc |
| 1235 hsa-mir-29c | FICD     | 0.40528949 mirna_pc  |
| 1236 hsa-mir-29c | KIAA1958 | 0.453404235 mirna_pc |
| 1237 hsa-mir-29c | TXNDC15  | 0.318960616 mirna_pc |
| 1238 hsa-mir-29c | IGFBP5   | 0.339578503 mirna_pc |
| 1239 hsa-mir-29c | DCAF11   | 0.330466512 mirna_pc |
| 1240 hsa-mir-29c | NDRG2    | 0.335430369 mirna_pc |
| 1241 hsa-mir-29c | PAFAH2   | 0.421258161 mirna_pc |

|                  |           |                      |
|------------------|-----------|----------------------|
| 1242 hsa-mir-29c | AKR7A3    | 0.519773843 mirna_pc |
| 1243 hsa-mir-29c | ENPP5     | 0.374219054 mirna_pc |
| 1244 hsa-mir-29c | FAM20A    | 0.305293135 mirna_pc |
| 1245 hsa-mir-29c | CTDSP1    | 0.316873615 mirna_pc |
| 1246 hsa-mir-29c | PEX7      | 0.374848987 mirna_pc |
| 1247 hsa-mir-29c | ANKAR     | 0.327114059 mirna_pc |
| 1248 hsa-mir-29c | TUBA8     | 0.39964785 mirna_pc  |
| 1249 hsa-mir-29c | PPAP2A    | 0.383264303 mirna_pc |
| 1250 hsa-mir-29c | GAB2      | 0.357311311 mirna_pc |
| 1251 hsa-mir-29c | PPP1R16B  | 0.426629208 mirna_pc |
| 1252 hsa-mir-29c | TXNRD2    | 0.374280451 mirna_pc |
| 1253 hsa-mir-29c | HIPK2     | 0.330323117 mirna_pc |
| 1254 hsa-mir-29c | EIF2AK3   | 0.466714636 mirna_pc |
| 1255 hsa-mir-29c | AAK1      | 0.355297646 mirna_pc |
| 1256 hsa-mir-29c | TFF1      | 0.306258618 mirna_pc |
| 1257 hsa-mir-29c | RUNDC2C   | 0.470302793 mirna_pc |
| 1258 hsa-mir-29c | LMBRD1    | 0.319631586 mirna_pc |
| 1259 hsa-mir-29c | PKIB      | 0.383800003 mirna_pc |
| 1260 hsa-mir-29c | WBP1      | 0.324387547 mirna_pc |
| 1261 hsa-mir-29c | SURF1     | 0.335073205 mirna_pc |
| 1262 hsa-mir-29c | BCKDHA    | 0.31102134 mirna_pc  |
| 1263 hsa-mir-29c | NEDD4L    | 0.334416492 mirna_pc |
| 1264 hsa-mir-29c | LOC643008 | 0.304115109 mirna_pc |
| 1265 hsa-mir-29c | ASB8      | 0.318523591 mirna_pc |
| 1266 hsa-mir-29c | CHP       | 0.421627899 mirna_pc |
| 1267 hsa-mir-29c | KLHDC7A   | 0.345903246 mirna_pc |
| 1268 hsa-mir-29c | SPCS3     | 0.367621457 mirna_pc |
| 1269 hsa-mir-29c | IDH2      | 0.421737116 mirna_pc |
| 1270 hsa-mir-29c | MXD4      | 0.377298104 mirna_pc |
| 1271 hsa-mir-29c | C3orf19   | 0.365071565 mirna_pc |
| 1272 hsa-mir-29c | ATG4A     | 0.394793633 mirna_pc |
| 1273 hsa-mir-29c | FAM46C    | 0.593474835 mirna_pc |
| 1274 hsa-mir-29c | UNC13B    | 0.317018531 mirna_pc |
| 1275 hsa-mir-29c | TMEM143   | 0.340570051 mirna_pc |
| 1276 hsa-mir-29c | CPA3      | 0.371642121 mirna_pc |
| 1277 hsa-mir-29c | F2RL3     | 0.354608198 mirna_pc |
| 1278 hsa-mir-29c | TRIP11    | 0.335472435 mirna_pc |
| 1279 hsa-mir-29c | FAM3B     | 0.392421926 mirna_pc |
| 1280 hsa-mir-29c | PPP3CC    | 0.415553459 mirna_pc |
| 1281 hsa-mir-29c | CCDC125   | 0.45759085 mirna_pc  |
| 1282 hsa-mir-29c | NCOA1     | 0.340994945 mirna_pc |
| 1283 hsa-mir-29c | MAN2C1    | 0.327287816 mirna_pc |
| 1284 hsa-mir-29c | DNAJC4    | 0.428130108 mirna_pc |
| 1285 hsa-mir-29c | KIAA0319L | 0.454547007 mirna_pc |
| 1286 hsa-mir-29c | ANXA10    | 0.438841652 mirna_pc |
| 1287 hsa-mir-29c | RAP1GAP2  | 0.389100749 mirna_pc |
| 1288 hsa-mir-29c | ZNF254    | 0.304401073 mirna_pc |
| 1289 hsa-mir-29c | REPS2     | 0.332699091 mirna_pc |
| 1290 hsa-mir-29c | MT1F      | 0.505901429 mirna_pc |
| 1291 hsa-mir-29c | GIMAP6    | 0.426907675 mirna_pc |
| 1292 hsa-mir-29c | TARSL2    | 0.300629933 mirna_pc |
| 1293 hsa-mir-29c | PLLP      | 0.390502927 mirna_pc |
| 1294 hsa-mir-29c | CXCL17    | 0.687071566 mirna_pc |
| 1295 hsa-mir-29c | NFATC2    | 0.350853973 mirna_pc |

|                  |           |                            |
|------------------|-----------|----------------------------|
| 1296 hsa-mir-29c | ADAM28    | 0.615978136 mirna_pc       |
| 1297 hsa-mir-29c | GIMAP5    | 0.418656078 mirna_pc       |
| 1298 hsa-mir-29c | C17orf107 | 0.312349372 mirna_pc       |
| 1299 hsa-mir-29c | ANKRD12   | 0.332996787 mirna_pc       |
| 1300 hsa-mir-29c | GLOD4     | 0.320984397 mirna_pc       |
| 1301 hsa-mir-29c | GGA2      | 0.341743101 mirna_pc       |
| 1302 hsa-mir-29c | TSPAN12   | 0.373154098 mirna_pc       |
| 1303 hsa-mir-29c | LARP1B    | 0.3008619 mirna_pc         |
| 1304 hsa-mir-29c | C2orf55   | 0.366252584 mirna_pc       |
| 1305 hsa-mir-29c | C5orf41   | 0.327792339 mirna_pc       |
| 1306 hsa-mir-29c | XPC       | 0.327433048 mirna_pc       |
| 1307 hsa-mir-29c | C10orf118 | 0.402714773 mirna_pc       |
| 1308 hsa-mir-29c | IFNAR1    | 0.320593977 mirna_pc       |
| 1309 hsa-mir-29c | SETDB2    | 0.344886334 mirna_pc       |
| 1310 hsa-mir-29c | ARHGEF6   | 0.4134299 mirna_pc         |
| 1311 hsa-mir-29c | C5orf32   | 0.508180925 mirna_pc       |
| 1312 hsa-mir-29c | MAN2B2    | 0.310160028 mirna_pc       |
| 1313 hsa-mir-29c | UQCRQ     | 0.384301015 mirna_pc       |
| 1314 hsa-mir-29c | SLC9A3R2  | 0.443518125 mirna_pc       |
| 1315 hsa-mir-29c | GALNT10   | 0.304642328 mirna_pc       |
| 1316 hsa-mir-29c | HSD17B4   | 0.322538108 mirna_pc       |
| 1317 hsa-mir-29c | ZNF33A    | 0.3016955 mirna_pc         |
| 1318 hsa-mir-29c | CREBL2    | 0.304511715 mirna_pc       |
| 1319 hsa-mir-29c | HERPUD1   | 0.645426465 mirna_pc       |
| 1320 hsa-mir-29c | ZNF33B    | 0.300877383 mirna_pc       |
| 1321 hsa-mir-29c | ZNF763    | 0.370826077 mirna_pc       |
| 1322 hsa-mir-29c | ZNF671    | 0.310668244 mirna_pc       |
| 1323 hsa-mir-29c | ANKRD43   | 0.3691907 mirna_pc         |
| 1324 hsa-mir-29c | MT1E      | 0.312905654 mirna_pc       |
| 1325 hsa-mir-29c | GPRC5C    | 0.381443894 mirna_pc       |
| 1326 hsa-mir-29c | CHPT1     | 0.344989464 mirna_pc       |
| 1327 hsa-mir-29c | SNRK      | 0.326266271 mirna_pc       |
| 1328 hsa-mir-29c | RAP1GAP   | 0.494306996 mirna_pc       |
| 1329 hsa-mir-29c | RORC      | 0.442275006 mirna_pc       |
| 1330 hsa-mir-29c | C9orf7    | 0.300747487 mirna_pc       |
| 1331 hsa-mir-29c | IGFBP2    | 0.351821656 mirna_pc       |
| 1332 hsa-mir-29c | PRKCB     | 0.391411076 mirna_pc       |
| 1333 hsa-mir-29c | TPSAB1    | 0.37191885 mirna_pc        |
| 1334 hsa-mir-29c | CABC1     | 0.439194864 mirna_pc       |
| 1335 hsa-mir-29c | GIMAP7    | 0.451850128 mirna_pc       |
| 1336 hsa-mir-29c | PPFIBP2   | 0.457066033 mirna_pc       |
| 1337 hsa-mir-29c | CST3      | 0.438426478 mirna_pc       |
| 1338 hsa-mir-29c | CYP2C9    | 0.335497316 mirna_pc       |
| 1339 hsa-mir-29c | TMBIM6    | 0.350235327 mirna_pc       |
| 1340 hsa-mir-29c |           | 6-Sep 0.415652591 mirna_pc |
| 1341 hsa-mir-29c | ZNF565    | 0.390697173 mirna_pc       |
| 1342 hsa-mir-29c | MAGIX     | 0.351118583 mirna_pc       |
| 1343 hsa-mir-29c | TMEM66    | 0.367236085 mirna_pc       |
| 1344 hsa-mir-29c | CTH       | 0.305568817 mirna_pc       |
| 1345 hsa-mir-29c | TP53INP1  | 0.413566327 mirna_pc       |
| 1346 hsa-mir-29c | PRLR      | 0.315703323 mirna_pc       |
| 1347 hsa-mir-29c | EPN1      | 0.376983513 mirna_pc       |
| 1348 hsa-mir-29c | RGL3      | 0.313516366 mirna_pc       |
| 1349 hsa-mir-29c | MAP4K3    | 0.335219413 mirna_pc       |

|                  |          |                      |
|------------------|----------|----------------------|
| 1350 hsa-mir-29c | TUBGCP6  | 0.314297303 mirna_pc |
| 1351 hsa-mir-29c | BCAS1    | 0.327509277 mirna_pc |
| 1352 hsa-mir-29c | ANO7     | 0.334421249 mirna_pc |
| 1353 hsa-mir-29c | ITSN2    | 0.333271762 mirna_pc |
| 1354 hsa-mir-29c | AZGP1    | 0.409469896 mirna_pc |
| 1355 hsa-mir-29c | FAM107B  | 0.368108492 mirna_pc |
| 1356 hsa-mir-29c | SH3BGRL2 | 0.327336653 mirna_pc |
| 1357 hsa-mir-29c | HMOX2    | 0.33935903 mirna_pc  |
| 1358 hsa-mir-29c | HOXC5    | 0.326716049 mirna_pc |
| 1359 hsa-mir-29c | RAPGEF4  | 0.36452317 mirna_pc  |
| 1360 hsa-mir-29c | KCNQ1    | 0.54980721 mirna_pc  |
| 1361 hsa-mir-29c | ARSD     | 0.367637078 mirna_pc |
| 1362 hsa-mir-29c | MAP3K5   | 0.311239772 mirna_pc |
| 1363 hsa-mir-29c | DCXR     | 0.396492322 mirna_pc |
| 1364 hsa-mir-29c | GIMAP8   | 0.312060335 mirna_pc |
| 1365 hsa-mir-29c | SLC41A2  | 0.439409444 mirna_pc |
| 1366 hsa-mir-29c | TMEM59   | 0.343111317 mirna_pc |
| 1367 hsa-mir-29c | CDC14A   | 0.360665509 mirna_pc |
| 1368 hsa-mir-29c | Clorf26  | 0.366545323 mirna_pc |
| 1369 hsa-mir-29c | TCEANC   | 0.311577167 mirna_pc |
| 1370 hsa-mir-29c | PTPRB    | 0.345393557 mirna_pc |
| 1371 hsa-mir-29c | IQGAP2   | 0.410019296 mirna_pc |
| 1372 hsa-mir-29c | RAB11B   | 0.342637979 mirna_pc |
| 1373 hsa-mir-29c | ZNF366   | 0.377203008 mirna_pc |
| 1374 hsa-mir-29c | SVIP     | 0.311065695 mirna_pc |
| 1375 hsa-mir-29c | ATP13A4  | 0.317360418 mirna_pc |
| 1376 hsa-mir-29c | PELI2    | 0.336952385 mirna_pc |
| 1377 hsa-mir-29c | CPM      | 0.372635529 mirna_pc |
| 1378 hsa-mir-29c | BRP44    | 0.301971298 mirna_pc |
| 1379 hsa-mir-29c | SLC9A2   | 0.394573007 mirna_pc |
| 1380 hsa-mir-29c | ACSS1    | 0.303946041 mirna_pc |
| 1381 hsa-mir-29c | CNOT6L   | 0.336702802 mirna_pc |
| 1382 hsa-mir-29c | PLCL2    | 0.34689541 mirna_pc  |
| 1383 hsa-mir-29c | XBP1     | 0.593092592 mirna_pc |
| 1384 hsa-mir-29c | Clorf130 | 0.466570732 mirna_pc |
| 1385 hsa-mir-29c | HIP1R    | 0.387965982 mirna_pc |
| 1386 hsa-mir-29c | TMEM175  | 0.311470596 mirna_pc |
| 1387 hsa-mir-29c | C2orf86  | 0.338910226 mirna_pc |
| 1388 hsa-mir-29c | FNDC3A   | 0.348693822 mirna_pc |
| 1389 hsa-mir-29c | GATA6    | 0.322711493 mirna_pc |
| 1390 hsa-mir-29c | GABARAP  | 0.332636558 mirna_pc |
| 1391 hsa-mir-29c | SIL1     | 0.334777426 mirna_pc |
| 1392 hsa-mir-29c | ZNF552   | 0.341908058 mirna_pc |
| 1393 hsa-mir-29c | CYP2R1   | 0.318182495 mirna_pc |
| 1394 hsa-mir-29c | ALDH1A1  | 0.475008938 mirna_pc |
| 1395 hsa-mir-29c | FBXW7    | 0.315476298 mirna_pc |
| 1396 hsa-mir-29c | TMEM219  | 0.361503666 mirna_pc |
| 1397 hsa-mir-29c | RNASE1   | 0.328227374 mirna_pc |
| 1398 hsa-mir-29c | RAMP3    | 0.360624721 mirna_pc |
| 1399 hsa-mir-29c | MECOM    | 0.338295512 mirna_pc |
| 1400 hsa-mir-29c | HPCAL1   | 0.343689521 mirna_pc |
| 1401 hsa-mir-29c | IDUA     | 0.447447623 mirna_pc |
| 1402 hsa-mir-29c | SERPINI1 | 0.463727201 mirna_pc |
| 1403 hsa-mir-29c | CHKB     | 0.39779568 mirna_pc  |

|                  |          |                      |
|------------------|----------|----------------------|
| 1404 hsa-mir-29c | UBE2J1   | 0.33921296 mirna_pc  |
| 1405 hsa-mir-29c | C11orf52 | 0.493726788 mirna_pc |
| 1406 hsa-mir-29c | RCSL1    | 0.356599279 mirna_pc |
| 1407 hsa-mir-29c | MIOS     | 0.322166962 mirna_pc |
| 1408 hsa-mir-29c | GRAMD1C  | 0.302771314 mirna_pc |
| 1409 hsa-mir-29c | GIMAP1   | 0.403711954 mirna_pc |
| 1410 hsa-mir-29c | CA2      | 0.317385198 mirna_pc |
| 1411 hsa-mir-29c | CSF1R    | 0.346348932 mirna_pc |
| 1412 hsa-mir-29c | CCDC56   | 0.442259605 mirna_pc |
| 1413 hsa-mir-29c | RAB17    | 0.418954888 mirna_pc |
| 1414 hsa-mir-29c | ZSCAN2   | 0.301657198 mirna_pc |
| 1415 hsa-mir-29c | CYTIP    | 0.53297367 mirna_pc  |
| 1416 hsa-mir-29c | CCNJL    | 0.313752094 mirna_pc |
| 1417 hsa-mir-29c | FA2H     | 0.342694059 mirna_pc |
| 1418 hsa-mir-29c | C11orf9  | 0.362108799 mirna_pc |
| 1419 hsa-mir-29c | OCEL1    | 0.314376102 mirna_pc |
| 1420 hsa-mir-29c | SLC16A10 | 0.338716008 mirna_pc |
| 1421 hsa-mir-29c | EPOR     | 0.308898247 mirna_pc |
| 1422 hsa-mir-29c | RHOBTB1  | 0.310137148 mirna_pc |
| 1423 hsa-mir-29c | TCN2     | 0.325917092 mirna_pc |
| 1424 hsa-mir-29c | SH3YL1   | 0.372739888 mirna_pc |
| 1425 hsa-mir-29c | PDE4A    | 0.379803459 mirna_pc |
| 1426 hsa-mir-29c | TXNDC11  | 0.405497996 mirna_pc |
| 1427 hsa-mir-29c | ANKRD44  | 0.334699675 mirna_pc |
| 1428 hsa-mir-29c | OSBPL7   | 0.313822727 mirna_pc |
| 1429 hsa-mir-29c | SPDEF    | 0.308171572 mirna_pc |
| 1430 hsa-mir-29c | ARHGAP18 | 0.388851243 mirna_pc |
| 1431 hsa-mir-29c | TMPRSS2  | 0.434216159 mirna_pc |
| 1432 hsa-mir-29c | DNAJB9   | 0.320279688 mirna_pc |
| 1433 hsa-mir-29c | VMAC     | 0.309013929 mirna_pc |
| 1434 hsa-mir-29c | TLR9     | 0.353982163 mirna_pc |
| 1435 hsa-mir-29c | CA9      | 0.426838435 mirna_pc |
| 1436 hsa-mir-29c | PREX1    | 0.426490919 mirna_pc |
| 1437 hsa-mir-29c | IGJ      | 0.502410398 mirna_pc |
| 1438 hsa-mir-29c | CLEC14A  | 0.34889351 mirna_pc  |
| 1439 hsa-mir-29c | DOCK2    | 0.517287741 mirna_pc |
| 1440 hsa-mir-29c | RASSF6   | 0.345214109 mirna_pc |
| 1441 hsa-mir-29c | CARD8    | 0.348978742 mirna_pc |
| 1442 hsa-mir-29c | SMAP2    | 0.433428397 mirna_pc |
| 1443 hsa-mir-29c | C13orf15 | 0.30199239 mirna_pc  |
| 1444 hsa-mir-29c | B4GALNT3 | 0.45465329 mirna_pc  |
| 1445 hsa-mir-29c | FAM65B   | 0.383444879 mirna_pc |
| 1446 hsa-mir-29c | POU2AF1  | 0.539874517 mirna_pc |
| 1447 hsa-mir-29c | SYVN1    | 0.375127846 mirna_pc |
| 1448 hsa-mir-29c | KIAA1324 | 0.364420262 mirna_pc |
| 1449 hsa-mir-29c | P2RY8    | 0.457306565 mirna_pc |
| 1450 hsa-mir-29c | ERP27    | 0.418361575 mirna_pc |
| 1451 hsa-mir-29c | CAPN13   | 0.452540577 mirna_pc |
| 1452 hsa-mir-29c | SH2D3C   | 0.305381217 mirna_pc |
| 1453 hsa-mir-29c | SYNRG    | 0.354996928 mirna_pc |
| 1454 hsa-mir-29c | PLA1A    | 0.33786541 mirna_pc  |
| 1455 hsa-mir-29c | EPB41L4B | 0.326763335 mirna_pc |
| 1456 hsa-mir-29c | CXCL13   | 0.328261035 mirna_pc |
| 1457 hsa-mir-29c | CDC42EP1 | 0.336576145 mirna_pc |

|                  |          |                            |
|------------------|----------|----------------------------|
| 1458 hsa-mir-29c | AKNA     | 0.37714554 mirna_pc        |
| 1459 hsa-mir-29c | RBM47    | 0.375203317 mirna_pc       |
| 1460 hsa-mir-29c | TMEM171  | 0.423487781 mirna_pc       |
| 1461 hsa-mir-29c | IL16     | 0.326930875 mirna_pc       |
| 1462 hsa-mir-29c | COR01A   | 0.30389154 mirna_pc        |
| 1463 hsa-mir-29c | PTPRJ    | 0.339586274 mirna_pc       |
| 1464 hsa-mir-29c | FUT8     | 0.312598739 mirna_pc       |
| 1465 hsa-mir-29c | ANKRD22  | 0.521683017 mirna_pc       |
| 1466 hsa-mir-29c | ARSA     | 0.361861326 mirna_pc       |
| 1467 hsa-mir-29c | AFTPH    | 0.396356961 mirna_pc       |
| 1468 hsa-mir-29c | GVIN1    | 0.359946605 mirna_pc       |
| 1469 hsa-mir-29c | FLI1     | 0.306041307 mirna_pc       |
| 1470 hsa-mir-29c | CPNE5    | 0.377588402 mirna_pc       |
| 1471 hsa-mir-29c | KCNN3    | 0.331809536 mirna_pc       |
| 1472 hsa-mir-29c | KLRK1    | 0.300802176 mirna_pc       |
| 1473 hsa-mir-29c | CD52     | 0.331205147 mirna_pc       |
| 1474 hsa-mir-29c | IPCEF1   | 0.395886156 mirna_pc       |
| 1475 hsa-mir-29c | LSP1     | 0.304903436 mirna_pc       |
| 1476 hsa-mir-29c | ADA      | 0.361450019 mirna_pc       |
| 1477 hsa-mir-29c | CD6      | 0.31248845 mirna_pc        |
| 1478 hsa-mir-29c | GAB3     | 0.31200141 mirna_pc        |
| 1479 hsa-mir-29c | CDK18    | 0.328974693 mirna_pc       |
| 1480 hsa-mir-29c | GIMAP4   | 0.355306638 mirna_pc       |
| 1481 hsa-mir-29c | RAMP2    | 0.305802997 mirna_pc       |
| 1482 hsa-mir-29c | ARHGAP15 | 0.368672198 mirna_pc       |
| 1483 hsa-mir-29c | FLJ40330 | 0.379080693 mirna_pc       |
| 1484 hsa-mir-29c | Clorf116 | 0.330260065 mirna_pc       |
| 1485 hsa-mir-29c | SASH3    | 0.341612772 mirna_pc       |
| 1486 hsa-mir-29c | MEI1     | 0.390561899 mirna_pc       |
| 1487 hsa-mir-29c | CD3D     | 0.303818096 mirna_pc       |
| 1488 hsa-mir-29c | CD3E     | 0.30930408 mirna_pc        |
| 1489 hsa-mir-29c | IRF4     | 0.440042646 mirna_pc       |
| 1490 hsa-mir-29c | BIN2     | 0.318689704 mirna_pc       |
| 1491 hsa-mir-29c | ARHGAP25 | 0.317707575 mirna_pc       |
| 1492 hsa-mir-29c | ITK      | 0.3580277 mirna_pc         |
| 1493 hsa-mir-29c | AMICA1   | 0.352929557 mirna_pc       |
| 1494 hsa-mir-29c | GMFG     | 0.318044996 mirna_pc       |
| 1495 hsa-mir-29c | SP140    | 0.316683778 mirna_pc       |
| 1496 hsa-mir-29c | CD79A    | 0.533081755 mirna_pc       |
| 1497 hsa-mir-29c | CHAC1    | 0.329826181 mirna_pc       |
| 1498 hsa-mir-29c | SSR4     | 0.457558278 mirna_pc       |
| 1499 hsa-mir-29c | CD3G     | 0.300491869 mirna_pc       |
| 1500 hsa-mir-29c | EPN3     | 0.468420741 mirna_pc       |
| 1501 hsa-mir-29c | FAIM3    | 0.410308276 mirna_pc       |
| 1502 hsa-mir-29c | FOXA1    | 0.317638905 mirna_pc       |
| 1503 hsa-mir-29c | SLAMF7   | 0.354806234 mirna_pc       |
| 1504 hsa-mir-29c | ADAM6    | 0.395678518 mirna_pc       |
| 1505 hsa-mir-29c | CSF2RB   | 0.321004754 mirna_pc       |
| 1506 hsa-mir-29c | MAP4K1   | 0.385577496 mirna_pc       |
| 1507 hsa-mir-29c | BTK      | 0.365106515 mirna_pc       |
| 1508 hsa-mir-29c | RHOH     | 0.309222898 mirna_pc       |
| 1509 hsa-mir-29c |          | 1-Sep 0.385052672 mirna_pc |
| 1510 hsa-mir-29c | FKBP11   | 0.401517313 mirna_pc       |
| 1511 hsa-mir-29c | POU2F2   | 0.360990485 mirna_pc       |



|                  |           |                      |
|------------------|-----------|----------------------|
| 1512 hsa-mir-29c | SELL      | 0.338609026 mirna_pc |
| 1513 hsa-mir-29c | ACAP1     | 0.346778364 mirna_pc |
| 1514 hsa-mir-29c | DERL3     | 0.399053538 mirna_pc |
| 1515 hsa-mir-29c | SLAMF6    | 0.387205327 mirna_pc |
| 1516 hsa-mir-29c | NAPSB     | 0.351393904 mirna_pc |
| 1517 hsa-mir-29c | PIK3CG    | 0.302246764 mirna_pc |
| 1518 hsa-mir-29c | DENND1C   | 0.438816857 mirna_pc |
| 1519 hsa-mir-29c | CD48      | 0.39254562 mirna_pc  |
| 1520 hsa-mir-29c | ITGAL     | 0.352089896 mirna_pc |
| 1521 hsa-mir-29c | WDFY4     | 0.332387521 mirna_pc |
| 1522 hsa-mir-29c | LAX1      | 0.373660251 mirna_pc |
| 1523 hsa-mir-29c | IKZF1     | 0.379463964 mirna_pc |
| 1524 hsa-mir-29c | DTX1      | 0.322784968 mirna_pc |
| 1525 hsa-mir-29c | CCR7      | 0.36351811 mirna_pc  |
| 1526 hsa-mir-29c | NLRC3     | 0.329860479 mirna_pc |
| 1527 hsa-mir-29c | ARHGAP9   | 0.311208379 mirna_pc |
| 1528 hsa-mir-29c | RASAL3    | 0.352716463 mirna_pc |
| 1529 hsa-mir-29c | PTPRC     | 0.300861797 mirna_pc |
| 1530 hsa-mir-29c | CD180     | 0.38403054 mirna_pc  |
| 1531 hsa-mir-29c | SLAMF1    | 0.360513662 mirna_pc |
| 1532 hsa-mir-29c | MGC29506  | 0.414265642 mirna_pc |
| 1533 hsa-mir-29c | IL10RA    | 0.315865843 mirna_pc |
| 1534 hsa-mir-29c | LOC96610  | 0.507565081 mirna_pc |
| 1535 hsa-mir-29c | PARP15    | 0.307157644 mirna_pc |
| 1536 hsa-mir-29c | FGD2      | 0.302788133 mirna_pc |
| 1537 hsa-mir-29c | TAGAP     | 0.375859675 mirna_pc |
| 1538 hsa-mir-29c | CD27      | 0.4246265 mirna_pc   |
| 1539 hsa-mir-29c | EVI2B     | 0.374788937 mirna_pc |
| 1540 hsa-mir-29c | FCRL5     | 0.386001104 mirna_pc |
| 1541 hsa-mir-29c | KLHL6     | 0.364137525 mirna_pc |
| 1542 hsa-mir-29c | CD37      | 0.388117571 mirna_pc |
| 1543 hsa-mir-29c | PTPRCAP   | 0.384483823 mirna_pc |
| 1544 hsa-mir-29c | CECR1     | 0.329951886 mirna_pc |
| 1545 hsa-mir-29c | TBC1D10C  | 0.376107976 mirna_pc |
| 1546 hsa-mir-29c | LYL1      | 0.338681724 mirna_pc |
| 1547 hsa-mir-29c | BANK1     | 0.325057965 mirna_pc |
| 1548 hsa-mir-574 | MT1G      | 0.313937156 mirna_pc |
| 1549 hsa-mir-574 | PXMP2     | 0.356524832 mirna_pc |
| 1550 hsa-mir-574 | CCDC149   | 0.31894438 mirna_pc  |
| 1551 hsa-mir-574 | NRTN      | 0.336219322 mirna_pc |
| 1552 hsa-mir-574 | CTSF      | 0.312935535 mirna_pc |
| 1553 hsa-mir-574 | SGSM3     | 0.305395262 mirna_pc |
| 1554 hsa-mir-574 | LOC729234 | 0.311804245 mirna_pc |
| 1555 hsa-mir-574 | FAM64A    | 0.334437711 mirna_pc |
| 1556 hsa-mir-574 | XKR8      | 0.324522267 mirna_pc |
| 1557 hsa-mir-574 | SLC30A9   | 0.327974665 mirna_pc |
| 1558 hsa-mir-574 | SSBP3     | 0.341589065 mirna_pc |
| 1559 hsa-mir-574 | MT1F      | 0.387703022 mirna_pc |
| 1560 hsa-mir-574 | WDR19     | 0.307401836 mirna_pc |
| 1561 hsa-mir-574 | C4orf52   | 0.404075832 mirna_pc |
| 1562 hsa-mir-574 | QDPR      | 0.309458667 mirna_pc |
| 1563 hsa-mir-574 | B3GALNT1  | 0.31056946 mirna_pc  |
| 1564 hsa-mir-574 | RBPJ      | 0.306622766 mirna_pc |
| 1565 hsa-mir-574 | CDRT4     | 0.328312071 mirna_pc |

|                  |          |                      |
|------------------|----------|----------------------|
| 1566 hsa-mir-574 | AS3MT    | 0.321919542 mirna_pc |
| 1567 hsa-mir-574 | LRPAP1   | 0.31088779 mirna_pc  |
| 1568 hsa-mir-574 | MEX3A    | 0.306067154 mirna_pc |
| 1569 hsa-mir-574 | TBC1D19  | 0.310101618 mirna_pc |
| 1570 hsa-mir-574 | UNC119B  | 0.331735261 mirna_pc |
| 1571 hsa-mir-574 | MAD2L2   | 0.330601032 mirna_pc |
| 1572 hsa-mir-574 | ERI3     | 0.308297493 mirna_pc |
| 1573 hsa-mir-574 | C16orf58 | 0.320110266 mirna_pc |
| 1574 hsa-mir-574 | IGSF9    | 0.326930708 mirna_pc |
| 1575 hsa-mir-574 | MRFAP1   | 0.358044984 mirna_pc |
| 1576 hsa-mir-574 | OSTC     | 0.345221912 mirna_pc |
| 1577 hsa-mir-574 | DMAP1    | 0.326672361 mirna_pc |
| 1578 hsa-mir-574 | RFC1     | 0.309180564 mirna_pc |
| 1579 hsa-mir-574 | FAM200B  | 0.315460457 mirna_pc |
| 1580 hsa-mir-574 | RAB28    | 0.4626285 mirna_pc   |
| 1581 hsa-mir-574 | MRFAP1L1 | 0.317180715 mirna_pc |
| 1582 hsa-mir-574 | ZNF599   | 0.310307796 mirna_pc |
| 1583 hsa-mir-574 | GPR125   | 0.440405941 mirna_pc |
| 1584 hsa-mir-574 | UROD     | 0.331074131 mirna_pc |
| 1585 hsa-mir-574 | ALX3     | 0.32668678 mirna_pc  |
| 1586 hsa-mir-574 | AKR7A2   | 0.402075341 mirna_pc |
| 1587 hsa-mir-574 | PTOV1    | 0.323346773 mirna_pc |
| 1588 hsa-mir-574 | NUDT16L1 | 0.304638394 mirna_pc |
| 1589 hsa-mir-574 | DCTD     | 0.314632783 mirna_pc |
| 1590 hsa-mir-574 | ABHD8    | 0.316763467 mirna_pc |
| 1591 hsa-mir-574 | TMEM9    | 0.316607064 mirna_pc |
| 1592 hsa-mir-574 | AGBL5    | 0.354439554 mirna_pc |
| 1593 hsa-mir-574 | MED28    | 0.38660696 mirna_pc  |
| 1594 hsa-mir-574 | LMAN2L   | 0.30468761 mirna_pc  |
| 1595 hsa-mir-574 | TCF7L1   | 0.319629074 mirna_pc |
| 1596 hsa-mir-574 | IQQC     | 0.341452123 mirna_pc |
| 1597 hsa-mir-574 | LOC93622 | 0.330917224 mirna_pc |
| 1598 hsa-mir-574 | DCAF16   | 0.383318325 mirna_pc |
| 1599 hsa-mir-574 | PABPC4L  | 0.320789999 mirna_pc |
| 1600 hsa-mir-574 | TRO      | 0.310381322 mirna_pc |
| 1601 hsa-mir-574 | PACRGL   | 0.360961675 mirna_pc |
| 1602 hsa-mir-574 | ETV5     | 0.315941486 mirna_pc |
| 1603 hsa-mir-574 | TXNL4A   | 0.30822008 mirna_pc  |
| 1604 hsa-mir-574 | BAI2     | 0.303575615 mirna_pc |
| 1605 hsa-mir-574 | UBE2MP1  | 0.304112479 mirna_pc |
| 1606 hsa-mir-1-2 | ZBTB16   | 0.679058029 mirna_pc |
| 1607 hsa-mir-1-2 | GREM2    | 0.538705258 mirna_pc |
| 1608 hsa-mir-1-2 | DPT      | 0.642118399 mirna_pc |
| 1609 hsa-mir-1-2 | AFF3     | 0.669750591 mirna_pc |
| 1610 hsa-mir-1-2 | NCAM1    | 0.577854867 mirna_pc |
| 1611 hsa-mir-1-2 | FAM107A  | 0.596477214 mirna_pc |
| 1612 hsa-mir-1-2 | KLF15    | 0.436829448 mirna_pc |
| 1613 hsa-mir-1-2 | P2RY14   | 0.562921082 mirna_pc |
| 1614 hsa-mir-1-2 | GPR133   | 0.388438907 mirna_pc |
| 1615 hsa-mir-1-2 | CLEC3B   | 0.63945778 mirna_pc  |
| 1616 hsa-mir-1-2 | GNG7     | 0.718789507 mirna_pc |
| 1617 hsa-mir-1-2 | RBPMS2   | 0.736736244 mirna_pc |
| 1618 hsa-mir-1-2 | SLC2A4   | 0.824254504 mirna_pc |
| 1619 hsa-mir-1-2 | CAB39L   | 0.608030674 mirna_pc |

|                  |           |                      |
|------------------|-----------|----------------------|
| 1620 hsa-mir-1-2 | ABCA8     | 0.623273515 mirna_pc |
| 1621 hsa-mir-1-2 | C7        | 0.689827725 mirna_pc |
| 1622 hsa-mir-1-2 | ADAMTSL1  | 0.635625486 mirna_pc |
| 1623 hsa-mir-1-2 | MAMDC2    | 0.642276085 mirna_pc |
| 1624 hsa-mir-1-2 | PLIN4     | 0.796182536 mirna_pc |
| 1625 hsa-mir-1-2 | ZNF471    | 0.544206923 mirna_pc |
| 1626 hsa-mir-1-2 | C3orf18   | 0.406795993 mirna_pc |
| 1627 hsa-mir-1-2 | HSPB7     | 0.698283583 mirna_pc |
| 1628 hsa-mir-1-2 | MYOCD     | 0.8783391 mirna_pc   |
| 1629 hsa-mir-1-2 | LYVE1     | 0.538097582 mirna_pc |
| 1630 hsa-mir-1-2 | RNF180    | 0.599482525 mirna_pc |
| 1631 hsa-mir-1-2 | OGN       | 0.531304411 mirna_pc |
| 1632 hsa-mir-1-2 | LONRF2    | 0.575991873 mirna_pc |
| 1633 hsa-mir-1-2 | CRY2      | 0.475362462 mirna_pc |
| 1634 hsa-mir-1-2 | PARK2     | 0.591916086 mirna_pc |
| 1635 hsa-mir-1-2 | ATOH8     | 0.499520394 mirna_pc |
| 1636 hsa-mir-1-2 | RGBB      | 0.415340358 mirna_pc |
| 1637 hsa-mir-1-2 | CGNL1     | 0.318273271 mirna_pc |
| 1638 hsa-mir-1-2 | NEGR1     | 0.811930306 mirna_pc |
| 1639 hsa-mir-1-2 | SLC25A4   | 0.34610523 mirna_pc  |
| 1640 hsa-mir-1-2 | CCL14     | 0.701006086 mirna_pc |
| 1641 hsa-mir-1-2 | C7orf41   | 0.606488608 mirna_pc |
| 1642 hsa-mir-1-2 | CHRD1     | 0.793973015 mirna_pc |
| 1643 hsa-mir-1-2 | RXR2      | 0.786900101 mirna_pc |
| 1644 hsa-mir-1-2 | PGM5      | 0.865332851 mirna_pc |
| 1645 hsa-mir-1-2 | HSPB6     | 0.672805331 mirna_pc |
| 1646 hsa-mir-1-2 | ITGA8     | 0.490246535 mirna_pc |
| 1647 hsa-mir-1-2 | KIT       | 0.331976599 mirna_pc |
| 1648 hsa-mir-1-2 | TMOD1     | 0.749298736 mirna_pc |
| 1649 hsa-mir-1-2 | ADAM33    | 0.69856623 mirna_pc  |
| 1650 hsa-mir-1-2 | C5orf4    | 0.482888443 mirna_pc |
| 1651 hsa-mir-1-2 | RCAN2     | 0.608792351 mirna_pc |
| 1652 hsa-mir-1-2 | MMRN1     | 0.525024754 mirna_pc |
| 1653 hsa-mir-1-2 | FAM54B    | 0.465886276 mirna_pc |
| 1654 hsa-mir-1-2 | PRX       | 0.346922055 mirna_pc |
| 1655 hsa-mir-1-2 | CFD       | 0.5612506 mirna_pc   |
| 1656 hsa-mir-1-2 | MITF      | 0.497500095 mirna_pc |
| 1657 hsa-mir-1-2 | SIK2      | 0.32478176 mirna_pc  |
| 1658 hsa-mir-1-2 | EFHA2     | 0.500800295 mirna_pc |
| 1659 hsa-mir-1-2 | GNAZ      | 0.540087791 mirna_pc |
| 1660 hsa-mir-1-2 | PDE2A     | 0.661371733 mirna_pc |
| 1661 hsa-mir-1-2 | CDH2      | 0.355305537 mirna_pc |
| 1662 hsa-mir-1-2 | RAI2      | 0.392597001 mirna_pc |
| 1663 hsa-mir-1-2 | C8orf84   | 0.493122128 mirna_pc |
| 1664 hsa-mir-1-2 | TNXX      | 0.58209502 mirna_pc  |
| 1665 hsa-mir-1-2 | ABI3BP    | 0.622974718 mirna_pc |
| 1666 hsa-mir-1-2 | DCLK2     | 0.555549031 mirna_pc |
| 1667 hsa-mir-1-2 | IPW       | 0.355114088 mirna_pc |
| 1668 hsa-mir-1-2 | ACACB     | 0.579116427 mirna_pc |
| 1669 hsa-mir-1-2 | ADAMTS8   | 0.617943353 mirna_pc |
| 1670 hsa-mir-1-2 | ANK2      | 0.69630176 mirna_pc  |
| 1671 hsa-mir-1-2 | C14orf159 | 0.311371182 mirna_pc |
| 1672 hsa-mir-1-2 | BVES      | 0.590909697 mirna_pc |
| 1673 hsa-mir-1-2 | ROR1      | 0.311042084 mirna_pc |

|                  |            |                      |
|------------------|------------|----------------------|
| 1674 hsa-mir-1-2 | TCF21      | 0.469362136 mirna_pc |
| 1675 hsa-mir-1-2 | SORBS2     | 0.495763924 mirna_pc |
| 1676 hsa-mir-1-2 | C5orf53    | 0.414658355 mirna_pc |
| 1677 hsa-mir-1-2 | LGI4       | 0.767976127 mirna_pc |
| 1678 hsa-mir-1-2 | C7orf58    | 0.711718953 mirna_pc |
| 1679 hsa-mir-1-2 | SDPR       | 0.646334694 mirna_pc |
| 1680 hsa-mir-1-2 | CBX7       | 0.727455235 mirna_pc |
| 1681 hsa-mir-1-2 | GALNTL2    | 0.440612221 mirna_pc |
| 1682 hsa-mir-1-2 | AOX1       | 0.36838864 mirna_pc  |
| 1683 hsa-mir-1-2 | IL33       | 0.382969937 mirna_pc |
| 1684 hsa-mir-1-2 | ARHGAP24   | 0.302304061 mirna_pc |
| 1685 hsa-mir-1-2 | PRIMA1     | 0.696702683 mirna_pc |
| 1686 hsa-mir-1-2 | EPM2A      | 0.783425331 mirna_pc |
| 1687 hsa-mir-1-2 | NECAB1     | 0.680907624 mirna_pc |
| 1688 hsa-mir-1-2 | DIRAS1     | 0.618828195 mirna_pc |
| 1689 hsa-mir-1-2 | SYNJ2BP    | 0.32764386 mirna_pc  |
| 1690 hsa-mir-1-2 | DAAM2      | 0.857004074 mirna_pc |
| 1691 hsa-mir-1-2 | CDHR3      | 0.53502637 mirna_pc  |
| 1692 hsa-mir-1-2 | TMEM8B     | 0.498292878 mirna_pc |
| 1693 hsa-mir-1-2 | ZSCAN18    | 0.527091639 mirna_pc |
| 1694 hsa-mir-1-2 | TTLL7      | 0.585556651 mirna_pc |
| 1695 hsa-mir-1-2 | PTGIS      | 0.627594624 mirna_pc |
| 1696 hsa-mir-1-2 | ZHX3       | 0.656677438 mirna_pc |
| 1697 hsa-mir-1-2 | GTF2IRD2P1 | 0.438828274 mirna_pc |
| 1698 hsa-mir-1-2 | SECISBP2L  | 0.361310105 mirna_pc |
| 1699 hsa-mir-1-2 | ITIH5      | 0.590743714 mirna_pc |
| 1700 hsa-mir-1-2 | ADAMTSL3   | 0.596099834 mirna_pc |
| 1701 hsa-mir-1-2 | KCNK3      | 0.347381975 mirna_pc |
| 1702 hsa-mir-1-2 | GPRASP1    | 0.735966305 mirna_pc |
| 1703 hsa-mir-1-2 | JAM2       | 0.76469622 mirna_pc  |
| 1704 hsa-mir-1-2 | PLCL1      | 0.713144774 mirna_pc |
| 1705 hsa-mir-1-2 | ITM2A      | 0.341235652 mirna_pc |
| 1706 hsa-mir-1-2 | PBXIP1     | 0.503598328 mirna_pc |
| 1707 hsa-mir-1-2 | PLN        | 0.824696545 mirna_pc |
| 1708 hsa-mir-1-2 | REEP1      | 0.660619435 mirna_pc |
| 1709 hsa-mir-1-2 | GNAO1      | 0.467854867 mirna_pc |
| 1710 hsa-mir-1-2 | ITGA9      | 0.544118448 mirna_pc |
| 1711 hsa-mir-1-2 | GTF2IRD2   | 0.407382967 mirna_pc |
| 1712 hsa-mir-1-2 | ADCY5      | 0.721789233 mirna_pc |
| 1713 hsa-mir-1-2 | CILP       | 0.454316121 mirna_pc |
| 1714 hsa-mir-1-2 | NPR 1.00   | 0.614301548 mirna_pc |
| 1715 hsa-mir-1-2 | ZBTB47     | 0.690928403 mirna_pc |
| 1716 hsa-mir-1-2 | PRKAA2     | 0.636474795 mirna_pc |
| 1717 hsa-mir-1-2 | DARC       | 0.684011873 mirna_pc |
| 1718 hsa-mir-1-2 | PTPN21     | 0.440352387 mirna_pc |
| 1719 hsa-mir-1-2 | FHL1       | 0.77093497 mirna_pc  |
| 1720 hsa-mir-1-2 | DMD        | 0.712512929 mirna_pc |
| 1721 hsa-mir-1-2 | DIXDC1     | 0.807321212 mirna_pc |
| 1722 hsa-mir-1-2 | SNX1       | 0.551953804 mirna_pc |
| 1723 hsa-mir-1-2 | KANK3      | 0.455102536 mirna_pc |
| 1724 hsa-mir-1-2 | CIRBP      | 0.301243556 mirna_pc |
| 1725 hsa-mir-1-2 | PEG3       | 0.756366341 mirna_pc |
| 1726 hsa-mir-1-2 | C1QTNF3    | 0.573664795 mirna_pc |
| 1727 hsa-mir-1-2 | ITPR1      | 0.775744441 mirna_pc |

|                  |            |                      |
|------------------|------------|----------------------|
| 1728 hsa-mir-1-2 | KLHDC1     | 0.455946618 mirna_pc |
| 1729 hsa-mir-1-2 | C6orf204   | 0.358811388 mirna_pc |
| 1730 hsa-mir-1-2 | BCL2L2     | 0.494027826 mirna_pc |
| 1731 hsa-mir-1-2 | MAP6       | 0.681108838 mirna_pc |
| 1732 hsa-mir-1-2 | PDK4       | 0.519488461 mirna_pc |
| 1733 hsa-mir-1-2 | KAT2B      | 0.331261995 mirna_pc |
| 1734 hsa-mir-1-2 | INPP5A     | 0.61679049 mirna_pc  |
| 1735 hsa-mir-1-2 | C16orf45   | 0.666199519 mirna_pc |
| 1736 hsa-mir-1-2 | MAPT       | 0.563063608 mirna_pc |
| 1737 hsa-mir-1-2 | MYOM1      | 0.751620766 mirna_pc |
| 1738 hsa-mir-1-2 | TENC1      | 0.693728668 mirna_pc |
| 1739 hsa-mir-1-2 | RECK       | 0.640992031 mirna_pc |
| 1740 hsa-mir-1-2 | PPP1R12C   | 0.657233774 mirna_pc |
| 1741 hsa-mir-1-2 | ABCA6      | 0.59895087 mirna_pc  |
| 1742 hsa-mir-1-2 | ANO5       | 0.432020792 mirna_pc |
| 1743 hsa-mir-1-2 | KCNMB1     | 0.811342226 mirna_pc |
| 1744 hsa-mir-1-2 | NCRNA00087 | 0.318329141 mirna_pc |
| 1745 hsa-mir-1-2 | LMOD1      | 0.872119822 mirna_pc |
| 1746 hsa-mir-1-2 | SLIT2      | 0.710481491 mirna_pc |
| 1747 hsa-mir-1-2 | ZNF470     | 0.326888719 mirna_pc |
| 1748 hsa-mir-1-2 | IL11RA     | 0.457519624 mirna_pc |
| 1749 hsa-mir-1-2 | NACAD      | 0.425722064 mirna_pc |
| 1750 hsa-mir-1-2 | GTF2IRD2B  | 0.395610022 mirna_pc |
| 1751 hsa-mir-1-2 | POU6F1     | 0.654610065 mirna_pc |
| 1752 hsa-mir-1-2 | PRKAR2B    | 0.781694461 mirna_pc |
| 1753 hsa-mir-1-2 | FYCO1      | 0.724152124 mirna_pc |
| 1754 hsa-mir-1-2 | ZFP28      | 0.352847856 mirna_pc |
| 1755 hsa-mir-1-2 | ZNF542     | 0.329100622 mirna_pc |
| 1756 hsa-mir-1-2 | SYNE1      | 0.538622828 mirna_pc |
| 1757 hsa-mir-1-2 | ZNF844     | 0.314074264 mirna_pc |
| 1758 hsa-mir-1-2 | TMEM47     | 0.757443345 mirna_pc |
| 1759 hsa-mir-1-2 | HCFC2      | 0.475387788 mirna_pc |
| 1760 hsa-mir-1-2 | ANKDD1A    | 0.465784733 mirna_pc |
| 1761 hsa-mir-1-2 | FOXN3      | 0.679010007 mirna_pc |
| 1762 hsa-mir-1-2 | AOC3       | 0.849859485 mirna_pc |
| 1763 hsa-mir-1-2 | CNN1       | 0.877891195 mirna_pc |
| 1764 hsa-mir-1-2 | PRELP      | 0.720567631 mirna_pc |
| 1765 hsa-mir-1-2 | PRICKLE2   | 0.766643762 mirna_pc |
| 1766 hsa-mir-1-2 | KCNAB1     | 0.448423136 mirna_pc |
| 1767 hsa-mir-1-2 | KLF9       | 0.660595186 mirna_pc |
| 1768 hsa-mir-1-2 | SORBS1     | 0.845807051 mirna_pc |
| 1769 hsa-mir-1-2 | PDZD4      | 0.625089659 mirna_pc |
| 1770 hsa-mir-1-2 | KIAA0430   | 0.472655627 mirna_pc |
| 1771 hsa-mir-1-2 | NBEA       | 0.57745802 mirna_pc  |
| 1772 hsa-mir-1-2 | TCEAL3     | 0.511641691 mirna_pc |
| 1773 hsa-mir-1-2 | LAMA2      | 0.463740172 mirna_pc |
| 1774 hsa-mir-1-2 | PHF17      | 0.464268241 mirna_pc |
| 1775 hsa-mir-1-2 | SCUBE1     | 0.729139 mirna_pc    |
| 1776 hsa-mir-1-2 | NEXN       | 0.803894884 mirna_pc |
| 1777 hsa-mir-1-2 | TOR1AIP1   | 0.629747158 mirna_pc |
| 1778 hsa-mir-1-2 | EIF4E3     | 0.628065652 mirna_pc |
| 1779 hsa-mir-1-2 | SOBP       | 0.535045593 mirna_pc |
| 1780 hsa-mir-1-2 | MOAP1      | 0.409140299 mirna_pc |
| 1781 hsa-mir-1-2 | PDE1A      | 0.557034651 mirna_pc |

|                  |           |                      |
|------------------|-----------|----------------------|
| 1782 hsa-mir-1-2 | ID4       | 0.369105996 mirna_pc |
| 1783 hsa-mir-1-2 | NFIC      | 0.613000226 mirna_pc |
| 1784 hsa-mir-1-2 | SPRYD3    | 0.360993696 mirna_pc |
| 1785 hsa-mir-1-2 | FAM172A   | 0.469189409 mirna_pc |
| 1786 hsa-mir-1-2 | GADD45B   | 0.691866989 mirna_pc |
| 1787 hsa-mir-1-2 | FBXL5     | 0.502344828 mirna_pc |
| 1788 hsa-mir-1-2 | DCLK1     | 0.478088547 mirna_pc |
| 1789 hsa-mir-1-2 | KCNMA1    | 0.727290971 mirna_pc |
| 1790 hsa-mir-1-2 | GARNL3    | 0.403500028 mirna_pc |
| 1791 hsa-mir-1-2 | SGSM2     | 0.434127787 mirna_pc |
| 1792 hsa-mir-1-2 | CSRNP1    | 0.545855249 mirna_pc |
| 1793 hsa-mir-1-2 | ARHGAP10  | 0.623122791 mirna_pc |
| 1794 hsa-mir-1-2 | FHL5      | 0.590907518 mirna_pc |
| 1795 hsa-mir-1-2 | CCNI      | 0.410184745 mirna_pc |
| 1796 hsa-mir-1-2 | CALCOCO1  | 0.582902179 mirna_pc |
| 1797 hsa-mir-1-2 | TSPYL2    | 0.442201854 mirna_pc |
| 1798 hsa-mir-1-2 | SOCS2     | 0.409765892 mirna_pc |
| 1799 hsa-mir-1-2 | ZNF568    | 0.325197797 mirna_pc |
| 1800 hsa-mir-1-2 | USP53     | 0.34101841 mirna_pc  |
| 1801 hsa-mir-1-2 | ZFYVE20   | 0.521038728 mirna_pc |
| 1802 hsa-mir-1-2 | INMT      | 0.721022655 mirna_pc |
| 1803 hsa-mir-1-2 | CCDC149   | 0.332602115 mirna_pc |
| 1804 hsa-mir-1-2 | MFAP5     | 0.487844866 mirna_pc |
| 1805 hsa-mir-1-2 | TSC22D3   | 0.338243211 mirna_pc |
| 1806 hsa-mir-1-2 | CA5B      | 0.397574613 mirna_pc |
| 1807 hsa-mir-1-2 | PPM1K     | 0.347745096 mirna_pc |
| 1808 hsa-mir-1-2 | SYNP02    | 0.857751721 mirna_pc |
| 1809 hsa-mir-1-2 | TGFBR3    | 0.719610471 mirna_pc |
| 1810 hsa-mir-1-2 | C14orf37  | 0.34992765 mirna_pc  |
| 1811 hsa-mir-1-2 | CACNB2    | 0.623933524 mirna_pc |
| 1812 hsa-mir-1-2 | SRPX      | 0.46476345 mirna_pc  |
| 1813 hsa-mir-1-2 | APBB1     | 0.548116811 mirna_pc |
| 1814 hsa-mir-1-2 | VAMP2     | 0.31582289 mirna_pc  |
| 1815 hsa-mir-1-2 | FZD4      | 0.300373414 mirna_pc |
| 1816 hsa-mir-1-2 | CAMTA2    | 0.329921981 mirna_pc |
| 1817 hsa-mir-1-2 | LOC728264 | 0.778689668 mirna_pc |
| 1818 hsa-mir-1-2 | SMAD9     | 0.553731994 mirna_pc |
| 1819 hsa-mir-1-2 | P2RX1     | 0.395860351 mirna_pc |
| 1820 hsa-mir-1-2 | DTNA      | 0.740467952 mirna_pc |
| 1821 hsa-mir-1-2 | HERC1     | 0.462983032 mirna_pc |
| 1822 hsa-mir-1-2 | ABL1      | 0.648153802 mirna_pc |
| 1823 hsa-mir-1-2 | BBS1      | 0.464856169 mirna_pc |
| 1824 hsa-mir-1-2 | KIF1C     | 0.362311041 mirna_pc |
| 1825 hsa-mir-1-2 | CYP1B1    | 0.349089038 mirna_pc |
| 1826 hsa-mir-1-2 | SLMAP     | 0.730783233 mirna_pc |
| 1827 hsa-mir-1-2 | C17orf91  | 0.362432071 mirna_pc |
| 1828 hsa-mir-1-2 | PGCP      | 0.366862168 mirna_pc |
| 1829 hsa-mir-1-2 | GABARAPL1 | 0.432947682 mirna_pc |
| 1830 hsa-mir-1-2 | PARD3B    | 0.366052523 mirna_pc |
| 1831 hsa-mir-1-2 | FKBP5     | 0.495373969 mirna_pc |
| 1832 hsa-mir-1-2 | EIF2C4    | 0.485945915 mirna_pc |
| 1833 hsa-mir-1-2 | CXCL12    | 0.525527414 mirna_pc |
| 1834 hsa-mir-1-2 | GSN       | 0.669915901 mirna_pc |
| 1835 hsa-mir-1-2 | C22orf39  | 0.494149996 mirna_pc |

|      |             |           |             |          |
|------|-------------|-----------|-------------|----------|
| 1836 | hsa-mir-1-2 | PDZRN3    | 0.578617148 | mirna_pc |
| 1837 | hsa-mir-1-2 | NISCH     | 0.341293933 | mirna_pc |
| 1838 | hsa-mir-1-2 | ZNF25     | 0.632966775 | mirna_pc |
| 1839 | hsa-mir-1-2 | LRIG1     | 0.306520724 | mirna_pc |
| 1840 | hsa-mir-1-2 | ZNF483    | 0.530502744 | mirna_pc |
| 1841 | hsa-mir-1-2 | COL14A1   | 0.529059818 | mirna_pc |
| 1842 | hsa-mir-1-2 | ZNF570    | 0.410269397 | mirna_pc |
| 1843 | hsa-mir-1-2 | ARHGAP6   | 0.374261421 | mirna_pc |
| 1844 | hsa-mir-1-2 | SMARCD3   | 0.357774301 | mirna_pc |
| 1845 | hsa-mir-1-2 | FLNC      | 0.817444863 | mirna_pc |
| 1846 | hsa-mir-1-2 | FOXF1     | 0.683699613 | mirna_pc |
| 1847 | hsa-mir-1-2 | PRUNE2    | 0.778402246 | mirna_pc |
| 1848 | hsa-mir-1-2 | ITGA7     | 0.770445407 | mirna_pc |
| 1849 | hsa-mir-1-2 | C14orf132 | 0.582439029 | mirna_pc |
| 1850 | hsa-mir-1-2 | NACC2     | 0.675778097 | mirna_pc |
| 1851 | hsa-mir-1-2 | TTC28     | 0.543857686 | mirna_pc |
| 1852 | hsa-mir-1-2 | CORO2B    | 0.490886133 | mirna_pc |
| 1853 | hsa-mir-1-2 | PDE7B     | 0.600188252 | mirna_pc |
| 1854 | hsa-mir-1-2 | CELF2     | 0.73050907  | mirna_pc |
| 1855 | hsa-mir-1-2 | PDE4D     | 0.480798537 | mirna_pc |
| 1856 | hsa-mir-1-2 | STARD8    | 0.431178818 | mirna_pc |
| 1857 | hsa-mir-1-2 | DMXL1     | 0.301870101 | mirna_pc |
| 1858 | hsa-mir-1-2 | C10orf26  | 0.453255579 | mirna_pc |
| 1859 | hsa-mir-1-2 | MASP1     | 0.340087923 | mirna_pc |
| 1860 | hsa-mir-1-2 | TMEM25    | 0.302062768 | mirna_pc |
| 1861 | hsa-mir-1-2 | FILIP1    | 0.797280211 | mirna_pc |
| 1862 | hsa-mir-1-2 | ZCCHC24   | 0.750131191 | mirna_pc |
| 1863 | hsa-mir-1-2 | C15orf17  | 0.376725099 | mirna_pc |
| 1864 | hsa-mir-1-2 | SLIT3     | 0.555485748 | mirna_pc |
| 1865 | hsa-mir-1-2 | DDR2      | 0.724921865 | mirna_pc |
| 1866 | hsa-mir-1-2 | KIAA0232  | 0.401503543 | mirna_pc |
| 1867 | hsa-mir-1-2 | ZNF347    | 0.308874553 | mirna_pc |
| 1868 | hsa-mir-1-2 | LIMS2     | 0.716301453 | mirna_pc |
| 1869 | hsa-mir-1-2 | C6orf225  | 0.472854288 | mirna_pc |
| 1870 | hsa-mir-1-2 | ASB1      | 0.311245991 | mirna_pc |
| 1871 | hsa-mir-1-2 | ATP1B2    | 0.660520741 | mirna_pc |
| 1872 | hsa-mir-1-2 | ADAMTS1   | 0.71551666  | mirna_pc |
| 1873 | hsa-mir-1-2 | MRVI1     | 0.81304119  | mirna_pc |
| 1874 | hsa-mir-1-2 | TNFSF12   | 0.663742525 | mirna_pc |
| 1875 | hsa-mir-1-2 | CMAH      | 0.374525498 | mirna_pc |
| 1876 | hsa-mir-1-2 | ROGDI     | 0.312081276 | mirna_pc |
| 1877 | hsa-mir-1-2 | CCDC69    | 0.846741671 | mirna_pc |
| 1878 | hsa-mir-1-2 | SIK3      | 0.338053088 | mirna_pc |
| 1879 | hsa-mir-1-2 | GPM6B     | 0.677016544 | mirna_pc |
| 1880 | hsa-mir-1-2 | NEK1      | 0.324311928 | mirna_pc |
| 1881 | hsa-mir-1-2 | PPAP2B    | 0.428300663 | mirna_pc |
| 1882 | hsa-mir-1-2 | HLF       | 0.762984031 | mirna_pc |
| 1883 | hsa-mir-1-2 | CFL2      | 0.772456542 | mirna_pc |
| 1884 | hsa-mir-1-2 | LAMB2     | 0.598685279 | mirna_pc |
| 1885 | hsa-mir-1-2 | ST5       | 0.347412215 | mirna_pc |
| 1886 | hsa-mir-1-2 | S1PR1     | 0.6090499   | mirna_pc |
| 1887 | hsa-mir-1-2 | WLS       | 0.644946675 | mirna_pc |
| 1888 | hsa-mir-1-2 | WFDC1     | 0.515466872 | mirna_pc |
| 1889 | hsa-mir-1-2 | CRYZL1    | 0.446517443 | mirna_pc |

|                  |            |                      |
|------------------|------------|----------------------|
| 1890 hsa-mir-1-2 | DACT3      | 0.840805302 mirna_pc |
| 1891 hsa-mir-1-2 | FGF2       | 0.628405099 mirna_pc |
| 1892 hsa-mir-1-2 | FILIP1L    | 0.69265075 mirna_pc  |
| 1893 hsa-mir-1-2 | DUSP3      | 0.563742536 mirna_pc |
| 1894 hsa-mir-1-2 | VPS13D     | 0.402892504 mirna_pc |
| 1895 hsa-mir-1-2 | PPP1R12B   | 0.864150412 mirna_pc |
| 1896 hsa-mir-1-2 | PITPNM2    | 0.343583783 mirna_pc |
| 1897 hsa-mir-1-2 | PIP5K1C    | 0.61850728 mirna_pc  |
| 1898 hsa-mir-1-2 | JPH2       | 0.835616666 mirna_pc |
| 1899 hsa-mir-1-2 | KIAA1737   | 0.371788414 mirna_pc |
| 1900 hsa-mir-1-2 | NFIA       | 0.554007236 mirna_pc |
| 1901 hsa-mir-1-2 | FRY        | 0.493285348 mirna_pc |
| 1902 hsa-mir-1-2 | OSR1       | 0.650273515 mirna_pc |
| 1903 hsa-mir-1-2 | FAM190B    | 0.541858486 mirna_pc |
| 1904 hsa-mir-1-2 | C13orf33   | 0.491007399 mirna_pc |
| 1905 hsa-mir-1-2 | PGR        | 0.71522226 mirna_pc  |
| 1906 hsa-mir-1-2 | ST6GALNAC6 | 0.554751164 mirna_pc |
| 1907 hsa-mir-1-2 | C6orf72    | 0.314707549 mirna_pc |
| 1908 hsa-mir-1-2 | OMD        | 0.444753389 mirna_pc |
| 1909 hsa-mir-1-2 | ACOX2      | 0.524429595 mirna_pc |
| 1910 hsa-mir-1-2 | PHYHIP     | 0.437311968 mirna_pc |
| 1911 hsa-mir-1-2 | SMOC2      | 0.572921248 mirna_pc |
| 1912 hsa-mir-1-2 | C9orf130   | 0.313157357 mirna_pc |
| 1913 hsa-mir-1-2 | CACNA1H    | 0.788476282 mirna_pc |
| 1914 hsa-mir-1-2 | KCNE4      | 0.376274381 mirna_pc |
| 1915 hsa-mir-1-2 | RFX2       | 0.493661558 mirna_pc |
| 1916 hsa-mir-1-2 | C14orf28   | 0.379453656 mirna_pc |
| 1917 hsa-mir-1-2 | SSC5D      | 0.692423686 mirna_pc |
| 1918 hsa-mir-1-2 | PTPRM      | 0.499858907 mirna_pc |
| 1919 hsa-mir-1-2 | CHADL      | 0.314844973 mirna_pc |
| 1920 hsa-mir-1-2 | RPS6KA5    | 0.562752773 mirna_pc |
| 1921 hsa-mir-1-2 | CRISPLD2   | 0.701016833 mirna_pc |
| 1922 hsa-mir-1-2 | STARD13    | 0.536857975 mirna_pc |
| 1923 hsa-mir-1-2 | FAM13B     | 0.589073758 mirna_pc |
| 1924 hsa-mir-1-2 | PER1       | 0.544534366 mirna_pc |
| 1925 hsa-mir-1-2 | TLE2       | 0.436104182 mirna_pc |
| 1926 hsa-mir-1-2 | C20orf194  | 0.596679873 mirna_pc |
| 1927 hsa-mir-1-2 | DNAJC27    | 0.368047621 mirna_pc |
| 1928 hsa-mir-1-2 | USP47      | 0.324023371 mirna_pc |
| 1929 hsa-mir-1-2 | ACTG2      | 0.883158871 mirna_pc |
| 1930 hsa-mir-1-2 | DMPK       | 0.7818472 mirna_pc   |
| 1931 hsa-mir-1-2 | APOLD1     | 0.489584635 mirna_pc |
| 1932 hsa-mir-1-2 | C9orf5     | 0.458804248 mirna_pc |
| 1933 hsa-mir-1-2 | ZBTB4      | 0.679394201 mirna_pc |
| 1934 hsa-mir-1-2 | TACR2      | 0.820539853 mirna_pc |
| 1935 hsa-mir-1-2 | WBSCR17    | 0.5788532 mirna_pc   |
| 1936 hsa-mir-1-2 | LRRN4CL    | 0.630744396 mirna_pc |
| 1937 hsa-mir-1-2 | CLIP3      | 0.739836193 mirna_pc |
| 1938 hsa-mir-1-2 | ARHGEF9    | 0.388084573 mirna_pc |
| 1939 hsa-mir-1-2 | MAGI2      | 0.534755269 mirna_pc |
| 1940 hsa-mir-1-2 | SLC22A17   | 0.515175359 mirna_pc |
| 1941 hsa-mir-1-2 | SYNGR1     | 0.333107735 mirna_pc |
| 1942 hsa-mir-1-2 | LTBP4      | 0.570793847 mirna_pc |
| 1943 hsa-mir-1-2 | UTRN       | 0.45260518 mirna_pc  |



|                  |           |                      |
|------------------|-----------|----------------------|
| 1944 hsa-mir-1-2 | AKAP6     | 0.653267572 mirna_pc |
| 1945 hsa-mir-1-2 | ADAMTS15  | 0.444176037 mirna_pc |
| 1946 hsa-mir-1-2 | RNF150    | 0.56302749 mirna_pc  |
| 1947 hsa-mir-1-2 | FAM13C    | 0.668728375 mirna_pc |
| 1948 hsa-mir-1-2 | MFAP4     | 0.562230979 mirna_pc |
| 1949 hsa-mir-1-2 | JAM3      | 0.686507618 mirna_pc |
| 1950 hsa-mir-1-2 | KANK2     | 0.807062849 mirna_pc |
| 1951 hsa-mir-1-2 | TOB2      | 0.341339348 mirna_pc |
| 1952 hsa-mir-1-2 | CSRP1     | 0.85480875 mirna_pc  |
| 1953 hsa-mir-1-2 | GPX3      | 0.332802453 mirna_pc |
| 1954 hsa-mir-1-2 | AG2       | 0.662035974 mirna_pc |
| 1955 hsa-mir-1-2 | SEMA3G    | 0.497133334 mirna_pc |
| 1956 hsa-mir-1-2 | MPRIP     | 0.34154836 mirna_pc  |
| 1957 hsa-mir-1-2 | SGEF      | 0.516629324 mirna_pc |
| 1958 hsa-mir-1-2 | CCL21     | 0.489052642 mirna_pc |
| 1959 hsa-mir-1-2 | SLC7A2    | 0.309074558 mirna_pc |
| 1960 hsa-mir-1-2 | PDE1B     | 0.511874337 mirna_pc |
| 1961 hsa-mir-1-2 | TNS1      | 0.834381367 mirna_pc |
| 1962 hsa-mir-1-2 | ZMYND11   | 0.397689935 mirna_pc |
| 1963 hsa-mir-1-2 | DYNC1LI2  | 0.401308781 mirna_pc |
| 1964 hsa-mir-1-2 | PTPLA     | 0.334106865 mirna_pc |
| 1965 hsa-mir-1-2 | PLXNA4    | 0.595865367 mirna_pc |
| 1966 hsa-mir-1-2 | ZNF331    | 0.394289309 mirna_pc |
| 1967 hsa-mir-1-2 | RSP03     | 0.697692356 mirna_pc |
| 1968 hsa-mir-1-2 | NFIX      | 0.45080387 mirna_pc  |
| 1969 hsa-mir-1-2 | SVEP1     | 0.496400557 mirna_pc |
| 1970 hsa-mir-1-2 | PODN      | 0.552107791 mirna_pc |
| 1971 hsa-mir-1-2 | PRKCE     | 0.402580512 mirna_pc |
| 1972 hsa-mir-1-2 | NCALD     | 0.500019206 mirna_pc |
| 1973 hsa-mir-1-2 | RAP1A     | 0.524406089 mirna_pc |
| 1974 hsa-mir-1-2 | DUSP22    | 0.302770942 mirna_pc |
| 1975 hsa-mir-1-2 | RERE      | 0.458874843 mirna_pc |
| 1976 hsa-mir-1-2 | KIAA1529  | 0.412948488 mirna_pc |
| 1977 hsa-mir-1-2 | C14orf139 | 0.356696417 mirna_pc |
| 1978 hsa-mir-1-2 | LIMCH1    | 0.399857017 mirna_pc |
| 1979 hsa-mir-1-2 | F8        | 0.653522556 mirna_pc |
| 1980 hsa-mir-1-2 | GIPC3     | 0.313705152 mirna_pc |
| 1981 hsa-mir-1-2 | ATL1      | 0.322569573 mirna_pc |
| 1982 hsa-mir-1-2 | ABCC9     | 0.598954488 mirna_pc |
| 1983 hsa-mir-1-2 | MYO9A     | 0.688830119 mirna_pc |
| 1984 hsa-mir-1-2 | NR4A3     | 0.575750272 mirna_pc |
| 1985 hsa-mir-1-2 | SHE       | 0.4866991 mirna_pc   |
| 1986 hsa-mir-1-2 | GPRASP2   | 0.368849293 mirna_pc |
| 1987 hsa-mir-1-2 | C12orf51  | 0.307416802 mirna_pc |
| 1988 hsa-mir-1-2 | ZC3H6     | 0.368064557 mirna_pc |
| 1989 hsa-mir-1-2 | ZNF569    | 0.361462482 mirna_pc |
| 1990 hsa-mir-1-2 | CSDC2     | 0.387075135 mirna_pc |
| 1991 hsa-mir-1-2 | C4orf31   | 0.302410121 mirna_pc |
| 1992 hsa-mir-1-2 | ZER1      | 0.34507608 mirna_pc  |
| 1993 hsa-mir-1-2 | RASGRP2   | 0.48995948 mirna_pc  |
| 1994 hsa-mir-1-2 | TCEAL1    | 0.521256644 mirna_pc |
| 1995 hsa-mir-1-2 | IL6ST     | 0.565037422 mirna_pc |
| 1996 hsa-mir-1-2 | KIAA1109  | 0.381938865 mirna_pc |
| 1997 hsa-mir-1-2 | CAND2     | 0.483863056 mirna_pc |

|                  |          |                      |
|------------------|----------|----------------------|
| 1998 hsa-mir-1-2 | MXI1     | 0.390508758 mirna_pc |
| 1999 hsa-mir-1-2 | ADD1     | 0.53009929 mirna_pc  |
| 2000 hsa-mir-1-2 | CYR1     | 0.414777628 mirna_pc |
| 2001 hsa-mir-1-2 | IKZF4    | 0.568462168 mirna_pc |
| 2002 hsa-mir-1-2 | NTN1     | 0.746129194 mirna_pc |
| 2003 hsa-mir-1-2 | PJA2     | 0.603297096 mirna_pc |
| 2004 hsa-mir-1-2 | TTLL11   | 0.513876683 mirna_pc |
| 2005 hsa-mir-1-2 | SETBP1   | 0.460977861 mirna_pc |
| 2006 hsa-mir-1-2 | PARVA    | 0.741800575 mirna_pc |
| 2007 hsa-mir-1-2 | ZFP106   | 0.422028546 mirna_pc |
| 2008 hsa-mir-1-2 | MSRB3    | 0.838048212 mirna_pc |
| 2009 hsa-mir-1-2 | SYNM     | 0.8304746 mirna_pc   |
| 2010 hsa-mir-1-2 | DSEL     | 0.312214514 mirna_pc |
| 2011 hsa-mir-1-2 | CNRIP1   | 0.598686234 mirna_pc |
| 2012 hsa-mir-1-2 | MAN1C1   | 0.582785407 mirna_pc |
| 2013 hsa-mir-1-2 | FERMT2   | 0.75366051 mirna_pc  |
| 2014 hsa-mir-1-2 | SNED1    | 0.342060858 mirna_pc |
| 2015 hsa-mir-1-2 | FOXP1    | 0.399051304 mirna_pc |
| 2016 hsa-mir-1-2 | FAT4     | 0.489535391 mirna_pc |
| 2017 hsa-mir-1-2 | FOXO3B   | 0.343460572 mirna_pc |
| 2018 hsa-mir-1-2 | DES      | 0.861379272 mirna_pc |
| 2019 hsa-mir-1-2 | SASH1    | 0.300932375 mirna_pc |
| 2020 hsa-mir-1-2 | TXNIP    | 0.580959368 mirna_pc |
| 2021 hsa-mir-1-2 | DLC1     | 0.578176932 mirna_pc |
| 2022 hsa-mir-1-2 | TPSB2    | 0.34547751 mirna_pc  |
| 2023 hsa-mir-1-2 | FAM129A  | 0.776667587 mirna_pc |
| 2024 hsa-mir-1-2 | CNST     | 0.427992504 mirna_pc |
| 2025 hsa-mir-1-2 | TECPR2   | 0.489729133 mirna_pc |
| 2026 hsa-mir-1-2 | SCN4B    | 0.335923901 mirna_pc |
| 2027 hsa-mir-1-2 | TEK      | 0.484975385 mirna_pc |
| 2028 hsa-mir-1-2 | GYPC     | 0.473945362 mirna_pc |
| 2029 hsa-mir-1-2 | MRGPRF   | 0.769265742 mirna_pc |
| 2030 hsa-mir-1-2 | CHRD     | 0.450767251 mirna_pc |
| 2031 hsa-mir-1-2 | LDB2     | 0.385599124 mirna_pc |
| 2032 hsa-mir-1-2 | LRRC70   | 0.381292559 mirna_pc |
| 2033 hsa-mir-1-2 | NRIP2    | 0.347498532 mirna_pc |
| 2034 hsa-mir-1-2 | AKAP12   | 0.615172048 mirna_pc |
| 2035 hsa-mir-1-2 | SMTN     | 0.777737281 mirna_pc |
| 2036 hsa-mir-1-2 | AKAP2    | 0.508220948 mirna_pc |
| 2037 hsa-mir-1-2 | HIPK3    | 0.584066812 mirna_pc |
| 2038 hsa-mir-1-2 | PTGS1    | 0.450156219 mirna_pc |
| 2039 hsa-mir-1-2 | EZH1     | 0.573384279 mirna_pc |
| 2040 hsa-mir-1-2 | WDTC1    | 0.300765129 mirna_pc |
| 2041 hsa-mir-1-2 | ZNF71    | 0.402349809 mirna_pc |
| 2042 hsa-mir-1-2 | SLC25A23 | 0.447858656 mirna_pc |
| 2043 hsa-mir-1-2 | ZNF287   | 0.32003693 mirna_pc  |
| 2044 hsa-mir-1-2 | PPM1L    | 0.351900246 mirna_pc |
| 2045 hsa-mir-1-2 | TXNDC15  | 0.316924634 mirna_pc |
| 2046 hsa-mir-1-2 | IGFBP5   | 0.520450667 mirna_pc |
| 2047 hsa-mir-1-2 | PRMT10   | 0.399394266 mirna_pc |
| 2048 hsa-mir-1-2 | SGCD     | 0.616170233 mirna_pc |
| 2049 hsa-mir-1-2 | AASS     | 0.405317026 mirna_pc |
| 2050 hsa-mir-1-2 | VLDLR    | 0.346734356 mirna_pc |
| 2051 hsa-mir-1-2 | BCHE     | 0.484716534 mirna_pc |

|      |             |           |             |          |
|------|-------------|-----------|-------------|----------|
| 2052 | hsa-mir-1-2 | FBXL7     | 0.620439766 | mirna_pc |
| 2053 | hsa-mir-1-2 | LEPROT    | 0.373644405 | mirna_pc |
| 2054 | hsa-mir-1-2 | AFF1      | 0.416043764 | mirna_pc |
| 2055 | hsa-mir-1-2 | AFF4      | 0.3501101   | mirna_pc |
| 2056 | hsa-mir-1-2 | LOC286367 | 0.318805226 | mirna_pc |
| 2057 | hsa-mir-1-2 | IGF1      | 0.479923508 | mirna_pc |
| 2058 | hsa-mir-1-2 | NHSL2     | 0.680475705 | mirna_pc |
| 2059 | hsa-mir-1-2 | RBPMS     | 0.739637506 | mirna_pc |
| 2060 | hsa-mir-1-2 | SPARCL1   | 0.727807199 | mirna_pc |
| 2061 | hsa-mir-1-2 | DCUN1D4   | 0.318103651 | mirna_pc |
| 2062 | hsa-mir-1-2 | FBXL22    | 0.707740985 | mirna_pc |
| 2063 | hsa-mir-1-2 | CALM1     | 0.330294767 | mirna_pc |
| 2064 | hsa-mir-1-2 | SOX17     | 0.568762417 | mirna_pc |
| 2065 | hsa-mir-1-2 | TUBA8     | 0.32641903  | mirna_pc |
| 2066 | hsa-mir-1-2 | PPAP2A    | 0.427232507 | mirna_pc |
| 2067 | hsa-mir-1-2 | DSTN      | 0.729022132 | mirna_pc |
| 2068 | hsa-mir-1-2 | EMCN      | 0.519502916 | mirna_pc |
| 2069 | hsa-mir-1-2 | EML1      | 0.690121859 | mirna_pc |
| 2070 | hsa-mir-1-2 | PIK3R1    | 0.436090573 | mirna_pc |
| 2071 | hsa-mir-1-2 | C1orf183  | 0.543002633 | mirna_pc |
| 2072 | hsa-mir-1-2 | BTG2      | 0.454413832 | mirna_pc |
| 2073 | hsa-mir-1-2 | BTC       | 0.597508017 | mirna_pc |
| 2074 | hsa-mir-1-2 | NLGN3     | 0.458891874 | mirna_pc |
| 2075 | hsa-mir-1-2 | PPP3CB    | 0.400263007 | mirna_pc |
| 2076 | hsa-mir-1-2 | BOC       | 0.64958267  | mirna_pc |
| 2077 | hsa-mir-1-2 | SPOP      | 0.488878375 | mirna_pc |
| 2078 | hsa-mir-1-2 | ADARB1    | 0.680254979 | mirna_pc |
| 2079 | hsa-mir-1-2 | TLN1      | 0.74661996  | mirna_pc |
| 2080 | hsa-mir-1-2 | TSPAN2    | 0.741073011 | mirna_pc |
| 2081 | hsa-mir-1-2 | CACNA1C   | 0.755629634 | mirna_pc |
| 2082 | hsa-mir-1-2 | POPDC2    | 0.692957374 | mirna_pc |
| 2083 | hsa-mir-1-2 | PSD       | 0.599633623 | mirna_pc |
| 2084 | hsa-mir-1-2 | ARHGAP20  | 0.721071846 | mirna_pc |
| 2085 | hsa-mir-1-2 | CHRM3     | 0.45247435  | mirna_pc |
| 2086 | hsa-mir-1-2 | FNBP1     | 0.816979486 | mirna_pc |
| 2087 | hsa-mir-1-2 | MYH11     | 0.856554101 | mirna_pc |
| 2088 | hsa-mir-1-2 | DLG4      | 0.328843235 | mirna_pc |
| 2089 | hsa-mir-1-2 | C15orf52  | 0.469824964 | mirna_pc |
| 2090 | hsa-mir-1-2 | CSDE1     | 0.501202468 | mirna_pc |
| 2091 | hsa-mir-1-2 | NAP1L5    | 0.501852872 | mirna_pc |
| 2092 | hsa-mir-1-2 | HSPB8     | 0.692223513 | mirna_pc |
| 2093 | hsa-mir-1-2 | TACC1     | 0.667689988 | mirna_pc |
| 2094 | hsa-mir-1-2 | MEGF8     | 0.409598495 | mirna_pc |
| 2095 | hsa-mir-1-2 | KLHL15    | 0.393756766 | mirna_pc |
| 2096 | hsa-mir-1-2 | WDR7      | 0.335623566 | mirna_pc |
| 2097 | hsa-mir-1-2 | CPA3      | 0.319404759 | mirna_pc |
| 2098 | hsa-mir-1-2 | COX7A1    | 0.769818839 | mirna_pc |
| 2099 | hsa-mir-1-2 | ZFPM2     | 0.6017565   | mirna_pc |
| 2100 | hsa-mir-1-2 | MECP2     | 0.46525898  | mirna_pc |
| 2101 | hsa-mir-1-2 | SERINC1   | 0.341252759 | mirna_pc |
| 2102 | hsa-mir-1-2 | ZNF423    | 0.441003086 | mirna_pc |
| 2103 | hsa-mir-1-2 | SRR       | 0.305098066 | mirna_pc |
| 2104 | hsa-mir-1-2 | SNX21     | 0.340682946 | mirna_pc |
| 2105 | hsa-mir-1-2 | PREX2     | 0.482148991 | mirna_pc |

|                  |           |                      |
|------------------|-----------|----------------------|
| 2106 hsa-mir-1-2 | NCOA1     | 0.346061553 mirna_pc |
| 2107 hsa-mir-1-2 | PHF1      | 0.330458813 mirna_pc |
| 2108 hsa-mir-1-2 | PKD1      | 0.666650552 mirna_pc |
| 2109 hsa-mir-1-2 | LOC375190 | 0.32160856 mirna_pc  |
| 2110 hsa-mir-1-2 | MPP2      | 0.432213601 mirna_pc |
| 2111 hsa-mir-1-2 | DENND2A   | 0.560907635 mirna_pc |
| 2112 hsa-mir-1-2 | F13A1     | 0.432141101 mirna_pc |
| 2113 hsa-mir-1-2 | CYBRD1    | 0.539562627 mirna_pc |
| 2114 hsa-mir-1-2 | POLK      | 0.302336575 mirna_pc |
| 2115 hsa-mir-1-2 | KCND3     | 0.648775962 mirna_pc |
| 2116 hsa-mir-1-2 | LRCH2     | 0.606888339 mirna_pc |
| 2117 hsa-mir-1-2 | FGL2      | 0.627164506 mirna_pc |
| 2118 hsa-mir-1-2 | CNTN4     | 0.392954163 mirna_pc |
| 2119 hsa-mir-1-2 | PCMTD1    | 0.337525231 mirna_pc |
| 2120 hsa-mir-1-2 | TSC22D1   | 0.308155307 mirna_pc |
| 2121 hsa-mir-1-2 | SCMH1     | 0.350778426 mirna_pc |
| 2122 hsa-mir-1-2 | FXYD6     | 0.577287693 mirna_pc |
| 2123 hsa-mir-1-2 | TRAK2     | 0.508227869 mirna_pc |
| 2124 hsa-mir-1-2 | GAB1      | 0.429997249 mirna_pc |
| 2125 hsa-mir-1-2 | ALS2CR8   | 0.324675708 mirna_pc |
| 2126 hsa-mir-1-2 | MAP3K3    | 0.556879246 mirna_pc |
| 2127 hsa-mir-1-2 | IQSEC1    | 0.318168394 mirna_pc |
| 2128 hsa-mir-1-2 | GIMAP6    | 0.326963068 mirna_pc |
| 2129 hsa-mir-1-2 | ILK       | 0.546359382 mirna_pc |
| 2130 hsa-mir-1-2 | TPM2      | 0.7858284 mirna_pc   |
| 2131 hsa-mir-1-2 | MKL2      | 0.415436437 mirna_pc |
| 2132 hsa-mir-1-2 | LRRK2     | 0.538321693 mirna_pc |
| 2133 hsa-mir-1-2 | FOXP2     | 0.607633209 mirna_pc |
| 2134 hsa-mir-1-2 | GGTA1     | 0.447675465 mirna_pc |
| 2135 hsa-mir-1-2 | ASB2      | 0.718752152 mirna_pc |
| 2136 hsa-mir-1-2 | TNRC6C    | 0.386946407 mirna_pc |
| 2137 hsa-mir-1-2 | GIMAP5    | 0.300445485 mirna_pc |
| 2138 hsa-mir-1-2 | ZZEF1     | 0.303398452 mirna_pc |
| 2139 hsa-mir-1-2 | CRYBG3    | 0.422490514 mirna_pc |
| 2140 hsa-mir-1-2 | DIP2C     | 0.69884492 mirna_pc  |
| 2141 hsa-mir-1-2 | SBF2      | 0.348372303 mirna_pc |
| 2142 hsa-mir-1-2 | KIAA0753  | 0.601563374 mirna_pc |
| 2143 hsa-mir-1-2 | ZNF295    | 0.424123524 mirna_pc |
| 2144 hsa-mir-1-2 | TAGLN     | 0.834197208 mirna_pc |
| 2145 hsa-mir-1-2 | BNC2      | 0.642704886 mirna_pc |
| 2146 hsa-mir-1-2 | TNFAIP8L3 | 0.443602483 mirna_pc |
| 2147 hsa-mir-1-2 | RGS2      | 0.640682678 mirna_pc |
| 2148 hsa-mir-1-2 | TMEM88    | 0.349596545 mirna_pc |
| 2149 hsa-mir-1-2 | C5orf41   | 0.408946997 mirna_pc |
| 2150 hsa-mir-1-2 | SH3BGRL   | 0.587036382 mirna_pc |
| 2151 hsa-mir-1-2 | MEF2D     | 0.401742428 mirna_pc |
| 2152 hsa-mir-1-2 | ITGB3     | 0.593421836 mirna_pc |
| 2153 hsa-mir-1-2 | PPP1R14A  | 0.640498797 mirna_pc |
| 2154 hsa-mir-1-2 | ZFAND5    | 0.49488235 mirna_pc  |
| 2155 hsa-mir-1-2 | TEF       | 0.319994716 mirna_pc |
| 2156 hsa-mir-1-2 | REV3L     | 0.423282464 mirna_pc |
| 2157 hsa-mir-1-2 | BMPR1B    | 0.347483735 mirna_pc |
| 2158 hsa-mir-1-2 | MAPRE2    | 0.301894385 mirna_pc |
| 2159 hsa-mir-1-2 | GAS6      | 0.357272965 mirna_pc |

|      |             |           |                   |          |
|------|-------------|-----------|-------------------|----------|
| 2160 | hsa-mir-1-2 | IPP       | 0.337669457       | mirna_pc |
| 2161 | hsa-mir-1-2 | C3orf70   | 0.666510159       | mirna_pc |
| 2162 | hsa-mir-1-2 | ARHGEF6   | 0.369215227       | mirna_pc |
| 2163 | hsa-mir-1-2 | MYL9      | 0.839146734       | mirna_pc |
| 2164 | hsa-mir-1-2 | FAM63B    | 0.452461334       | mirna_pc |
| 2165 | hsa-mir-1-2 | DOCK3     | 0.661156653       | mirna_pc |
| 2166 | hsa-mir-1-2 |           | 2-Mar 0.510729269 | mirna_pc |
| 2167 | hsa-mir-1-2 | ACTA2     | 0.858809912       | mirna_pc |
| 2168 | hsa-mir-1-2 | ARID5B    | 0.502666466       | mirna_pc |
| 2169 | hsa-mir-1-2 | PDLIM3    | 0.808444767       | mirna_pc |
| 2170 | hsa-mir-1-2 | COLEC12   | 0.65390418        | mirna_pc |
| 2171 | hsa-mir-1-2 | NFASC     | 0.733443678       | mirna_pc |
| 2172 | hsa-mir-1-2 | ZNF671    | 0.319221409       | mirna_pc |
| 2173 | hsa-mir-1-2 | MMRN2     | 0.52253649        | mirna_pc |
| 2174 | hsa-mir-1-2 | MYO1C     | 0.348394853       | mirna_pc |
| 2175 | hsa-mir-1-2 | ZNF248    | 0.305972844       | mirna_pc |
| 2176 | hsa-mir-1-2 | NR2F1     | 0.402000289       | mirna_pc |
| 2177 | hsa-mir-1-2 | ARHGEF15  | 0.470965772       | mirna_pc |
| 2178 | hsa-mir-1-2 | DNAJB5    | 0.457198443       | mirna_pc |
| 2179 | hsa-mir-1-2 | LOC401093 | 0.7943893         | mirna_pc |
| 2180 | hsa-mir-1-2 | FBLN5     | 0.449969956       | mirna_pc |
| 2181 | hsa-mir-1-2 | TPSAB1    | 0.348389647       | mirna_pc |
| 2182 | hsa-mir-1-2 | RHOB      | 0.451964986       | mirna_pc |
| 2183 | hsa-mir-1-2 | TGFBR2    | 0.376040339       | mirna_pc |
| 2184 | hsa-mir-1-2 | HDAC5     | 0.357101785       | mirna_pc |
| 2185 | hsa-mir-1-2 | CYP2U1    | 0.397566029       | mirna_pc |
| 2186 | hsa-mir-1-2 | LOC387647 | 0.322159656       | mirna_pc |
| 2187 | hsa-mir-1-2 | TPM1      | 0.782305037       | mirna_pc |
| 2188 | hsa-mir-1-2 | MBD5      | 0.453432671       | mirna_pc |
| 2189 | hsa-mir-1-2 | MYCT1     | 0.493468925       | mirna_pc |
| 2190 | hsa-mir-1-2 | MTR       | 0.37263043        | mirna_pc |
| 2191 | hsa-mir-1-2 | SH3BP5    | 0.492352388       | mirna_pc |
| 2192 | hsa-mir-1-2 | MPDZ      | 0.73459988        | mirna_pc |
| 2193 | hsa-mir-1-2 | RUNX1T1   | 0.365028082       | mirna_pc |
| 2194 | hsa-mir-1-2 | FGF7      | 0.455688448       | mirna_pc |
| 2195 | hsa-mir-1-2 | S1PR3     | 0.770348323       | mirna_pc |
| 2196 | hsa-mir-1-2 | LPP       | 0.788350071       | mirna_pc |
| 2197 | hsa-mir-1-2 | BMPRI1A   | 0.496133153       | mirna_pc |
| 2198 | hsa-mir-1-2 | STON1     | 0.750889005       | mirna_pc |
| 2199 | hsa-mir-1-2 | LOC399959 | 0.656092923       | mirna_pc |
| 2200 | hsa-mir-1-2 | GAS7      | 0.588513174       | mirna_pc |
| 2201 | hsa-mir-1-2 | WDFY3     | 0.315701997       | mirna_pc |
| 2202 | hsa-mir-1-2 | SOS 2     | 0.318268029       | mirna_pc |
| 2203 | hsa-mir-1-2 | ROM1      | 0.464614162       | mirna_pc |
| 2204 | hsa-mir-1-2 | ZNF354C   | 0.322501285       | mirna_pc |
| 2205 | hsa-mir-1-2 | C21orf63  | 0.42068118        | mirna_pc |
| 2206 | hsa-mir-1-2 | ABCA10    | 0.320707963       | mirna_pc |
| 2207 | hsa-mir-1-2 | CADPS2    | 0.356382822       | mirna_pc |
| 2208 | hsa-mir-1-2 | KRBA2     | 0.371239635       | mirna_pc |
| 2209 | hsa-mir-1-2 | ROR2      | 0.417344737       | mirna_pc |
| 2210 | hsa-mir-1-2 | RUSC2     | 0.4595912         | mirna_pc |
| 2211 | hsa-mir-1-2 | PI4KA     | 0.323209934       | mirna_pc |
| 2212 | hsa-mir-1-2 | RBL2      | 0.300878152       | mirna_pc |
| 2213 | hsa-mir-1-2 | PLCD4     | 0.700977713       | mirna_pc |

|      |             |           |             |          |
|------|-------------|-----------|-------------|----------|
| 2214 | hsa-mir-1-2 | STAT5B    | 0.509288789 | mirna_pc |
| 2215 | hsa-mir-1-2 | RADIL     | 0.378920144 | mirna_pc |
| 2216 | hsa-mir-1-2 | SPG20     | 0.41303505  | mirna_pc |
| 2217 | hsa-mir-1-2 | RGS5      | 0.333062778 | mirna_pc |
| 2218 | hsa-mir-1-2 | MYLK      | 0.811428535 | mirna_pc |
| 2219 | hsa-mir-1-2 | AVPR1A    | 0.616919199 | mirna_pc |
| 2220 | hsa-mir-1-2 | ZNF280D   | 0.307199928 | mirna_pc |
| 2221 | hsa-mir-1-2 | USP20     | 0.407494009 | mirna_pc |
| 2222 | hsa-mir-1-2 | ATP10A    | 0.418293626 | mirna_pc |
| 2223 | hsa-mir-1-2 | TIMP3     | 0.569796543 | mirna_pc |
| 2224 | hsa-mir-1-2 | PER3      | 0.467500922 | mirna_pc |
| 2225 | hsa-mir-1-2 | MID2      | 0.37882801  | mirna_pc |
| 2226 | hsa-mir-1-2 | SETD7     | 0.35923791  | mirna_pc |
| 2227 | hsa-mir-1-2 | ICA1L     | 0.401751835 | mirna_pc |
| 2228 | hsa-mir-1-2 | PAM       | 0.428888464 | mirna_pc |
| 2229 | hsa-mir-1-2 | PCDHGB7   | 0.342685416 | mirna_pc |
| 2230 | hsa-mir-1-2 | FBLN1     | 0.577726905 | mirna_pc |
| 2231 | hsa-mir-1-2 | GNG11     | 0.412367823 | mirna_pc |
| 2232 | hsa-mir-1-2 | USP12     | 0.450293536 | mirna_pc |
| 2233 | hsa-mir-1-2 | NRXN3     | 0.728961409 | mirna_pc |
| 2234 | hsa-mir-1-2 | PRMT2     | 0.431877227 | mirna_pc |
| 2235 | hsa-mir-1-2 | CCDC80    | 0.600175095 | mirna_pc |
| 2236 | hsa-mir-1-2 | DCHS1     | 0.459214423 | mirna_pc |
| 2237 | hsa-mir-1-2 | GEFT      | 0.719835112 | mirna_pc |
| 2238 | hsa-mir-1-2 | SAMD11    | 0.420442897 | mirna_pc |
| 2239 | hsa-mir-1-2 | JMY       | 0.447361292 | mirna_pc |
| 2240 | hsa-mir-1-2 | LOC284900 | 0.327993386 | mirna_pc |
| 2241 | hsa-mir-1-2 | NFATC4    | 0.446502849 | mirna_pc |
| 2242 | hsa-mir-1-2 | LOC92249  | 0.347953993 | mirna_pc |
| 2243 | hsa-mir-1-2 | REEP2     | 0.541444214 | mirna_pc |
| 2244 | hsa-mir-1-2 | ZBTB8A    | 0.337052282 | mirna_pc |
| 2245 | hsa-mir-1-2 | ADCY4     | 0.400471927 | mirna_pc |
| 2246 | hsa-mir-1-2 | PBX3      | 0.373176259 | mirna_pc |
| 2247 | hsa-mir-1-2 | DCN       | 0.569912623 | mirna_pc |
| 2248 | hsa-mir-1-2 | LONRF1    | 0.382916622 | mirna_pc |
| 2249 | hsa-mir-1-2 | ARHGEF10  | 0.340383657 | mirna_pc |
| 2250 | hsa-mir-1-2 | PHC1      | 0.343374336 | mirna_pc |
| 2251 | hsa-mir-1-2 | LTBP3     | 0.566875664 | mirna_pc |
| 2252 | hsa-mir-1-2 | PCDH7     | 0.518191789 | mirna_pc |
| 2253 | hsa-mir-1-2 | SYT15     | 0.415184638 | mirna_pc |
| 2254 | hsa-mir-1-2 | ZYG11B    | 0.463982298 | mirna_pc |
| 2255 | hsa-mir-1-2 | CTGF      | 0.617584834 | mirna_pc |
| 2256 | hsa-mir-1-2 | CC2D2A    | 0.57462438  | mirna_pc |
| 2257 | hsa-mir-1-2 | FAM114A1  | 0.316090283 | mirna_pc |
| 2258 | hsa-mir-1-2 | GIMAP8    | 0.374313384 | mirna_pc |
| 2259 | hsa-mir-1-2 | AHNAK     | 0.444214143 | mirna_pc |
| 2260 | hsa-mir-1-2 | ANXA6     | 0.564254063 | mirna_pc |
| 2261 | hsa-mir-1-2 | VAT1L     | 0.320284716 | mirna_pc |
| 2262 | hsa-mir-1-2 | LSM 11.00 | 0.637089524 | mirna_pc |
| 2263 | hsa-mir-1-2 | ENPP1     | 0.335915603 | mirna_pc |
| 2264 | hsa-mir-1-2 | LOC644538 | 0.559827656 | mirna_pc |
| 2265 | hsa-mir-1-2 | SSBP2     | 0.480421251 | mirna_pc |
| 2266 | hsa-mir-1-2 | SYNC      | 0.680031837 | mirna_pc |
| 2267 | hsa-mir-1-2 | SYDE2     | 0.626128082 | mirna_pc |

|      |             |             |             |          |
|------|-------------|-------------|-------------|----------|
| 2268 | hsa-mir-1-2 | ULK2        | 0.352959068 | mirna_pc |
| 2269 | hsa-mir-1-2 | PDE5A       | 0.726209698 | mirna_pc |
| 2270 | hsa-mir-1-2 | PPM1A       | 0.316062268 | mirna_pc |
| 2271 | hsa-mir-1-2 | GLIPR2      | 0.487107362 | mirna_pc |
| 2272 | hsa-mir-1-2 | CPXM2       | 0.705825794 | mirna_pc |
| 2273 | hsa-mir-1-2 | DNAJC18     | 0.628954018 | mirna_pc |
| 2274 | hsa-mir-1-2 | ZFYVE21     | 0.330630098 | mirna_pc |
| 2275 | hsa-mir-1-2 | SAMD4A      | 0.479700887 | mirna_pc |
| 2276 | hsa-mir-1-2 | HSD17B6     | 0.330496076 | mirna_pc |
| 2277 | hsa-mir-1-2 | SELP        | 0.394025967 | mirna_pc |
| 2278 | hsa-mir-1-2 | PTPRB       | 0.309582569 | mirna_pc |
| 2279 | hsa-mir-1-2 | RUNDC2A     | 0.315084285 | mirna_pc |
| 2280 | hsa-mir-1-2 | PBX1        | 0.494638125 | mirna_pc |
| 2281 | hsa-mir-1-2 | ZBTB20      | 0.45262918  | mirna_pc |
| 2282 | hsa-mir-1-2 | RASL12      | 0.705308613 | mirna_pc |
| 2283 | hsa-mir-1-2 | PRKD1       | 0.426590565 | mirna_pc |
| 2284 | hsa-mir-1-2 | OPHN1       | 0.302704911 | mirna_pc |
| 2285 | hsa-mir-1-2 | PRDM5       | 0.30044715  | mirna_pc |
| 2286 | hsa-mir-1-2 | LOH3CR2A    | 0.326391742 | mirna_pc |
| 2287 | hsa-mir-1-2 | PALM2-AKAP2 | 0.352104797 | mirna_pc |
| 2288 | hsa-mir-1-2 | FAM70A      | 0.336444903 | mirna_pc |
| 2289 | hsa-mir-1-2 | SOD3        | 0.572566519 | mirna_pc |
| 2290 | hsa-mir-1-2 | SYNPO       | 0.493321488 | mirna_pc |
| 2291 | hsa-mir-1-2 | SLC25A12    | 0.456000381 | mirna_pc |
| 2292 | hsa-mir-1-2 | CXorf36     | 0.466305031 | mirna_pc |
| 2293 | hsa-mir-1-2 | FOSL2       | 0.390838367 | mirna_pc |
| 2294 | hsa-mir-1-2 | CALD1       | 0.80554136  | mirna_pc |
| 2295 | hsa-mir-1-2 | TEAD1       | 0.531122888 | mirna_pc |
| 2296 | hsa-mir-1-2 | KCNJ8       | 0.509185905 | mirna_pc |
| 2297 | hsa-mir-1-2 | Clorf21     | 0.488805329 | mirna_pc |
| 2298 | hsa-mir-1-2 | CNTNAP1     | 0.610518377 | mirna_pc |
| 2299 | hsa-mir-1-2 | RASSF2      | 0.413620228 | mirna_pc |
| 2300 | hsa-mir-1-2 | KCTD7       | 0.344847247 | mirna_pc |
| 2301 | hsa-mir-1-2 | LNPEP       | 0.411784053 | mirna_pc |
| 2302 | hsa-mir-1-2 | ZEB2        | 0.419335452 | mirna_pc |
| 2303 | hsa-mir-1-2 | LILRB5      | 0.353837445 | mirna_pc |
| 2304 | hsa-mir-1-2 | ZFYVE9      | 0.329218853 | mirna_pc |
| 2305 | hsa-mir-1-2 | RNF38       | 0.343722092 | mirna_pc |
| 2306 | hsa-mir-1-2 | SMARCA2     | 0.378435681 | mirna_pc |
| 2307 | hsa-mir-1-2 | TACC2       | 0.355269136 | mirna_pc |
| 2308 | hsa-mir-1-2 | CREB3L2     | 0.321354932 | mirna_pc |
| 2309 | hsa-mir-1-2 | SGCB        | 0.590863525 | mirna_pc |
| 2310 | hsa-mir-1-2 | ESYT2       | 0.319098208 | mirna_pc |
| 2311 | hsa-mir-1-2 | LOC283174   | 0.606055949 | mirna_pc |
| 2312 | hsa-mir-1-2 | SFMBT2      | 0.432889116 | mirna_pc |
| 2313 | hsa-mir-1-2 | ASAM        | 0.485387003 | mirna_pc |
| 2314 | hsa-mir-1-2 | GNAL        | 0.470463759 | mirna_pc |
| 2315 | hsa-mir-1-2 | PRKG1       | 0.679406197 | mirna_pc |
| 2316 | hsa-mir-1-2 | EPAS1       | 0.305419789 | mirna_pc |
| 2317 | hsa-mir-1-2 | TP53INP2    | 0.308376024 | mirna_pc |
| 2318 | hsa-mir-1-2 | CUEDC1      | 0.341023075 | mirna_pc |
| 2319 | hsa-mir-1-2 | C10orf72    | 0.468223111 | mirna_pc |
| 2320 | hsa-mir-1-2 | ANKS1A      | 0.563786736 | mirna_pc |
| 2321 | hsa-mir-1-2 | CYB5R3      | 0.319983283 | mirna_pc |

|      |             |           |             |          |
|------|-------------|-----------|-------------|----------|
| 2322 | hsa-mir-1-2 | EBF1      | 0.499412042 | mirna_pc |
| 2323 | hsa-mir-1-2 | C9orf172  | 0.498817977 | mirna_pc |
| 2324 | hsa-mir-1-2 | KCTD2     | 0.309185231 | mirna_pc |
| 2325 | hsa-mir-1-2 | RBMS3     | 0.543097953 | mirna_pc |
| 2326 | hsa-mir-1-2 | TGFB1I1   | 0.672264182 | mirna_pc |
| 2327 | hsa-mir-1-2 | TRPC1     | 0.56125839  | mirna_pc |
| 2328 | hsa-mir-1-2 | KLF11     | 0.312729702 | mirna_pc |
| 2329 | hsa-mir-1-2 | ZNF704    | 0.307658894 | mirna_pc |
| 2330 | hsa-mir-1-2 | SUN2      | 0.409446278 | mirna_pc |
| 2331 | hsa-mir-1-2 | RHOJ      | 0.500334438 | mirna_pc |
| 2332 | hsa-mir-1-2 | VPS24     | 0.388958625 | mirna_pc |
| 2333 | hsa-mir-1-2 | EPHA3     | 0.430934347 | mirna_pc |
| 2334 | hsa-mir-1-2 | CRTAP     | 0.484596441 | mirna_pc |
| 2335 | hsa-mir-1-2 | ABLIM3    | 0.311370854 | mirna_pc |
| 2336 | hsa-mir-1-2 | SCN1B     | 0.310640965 | mirna_pc |
| 2337 | hsa-mir-1-2 | EEF2K     | 0.320770519 | mirna_pc |
| 2338 | hsa-mir-1-2 | AGL       | 0.392839075 | mirna_pc |
| 2339 | hsa-mir-1-2 | UHRF1BP1L | 0.310578383 | mirna_pc |
| 2340 | hsa-mir-1-2 | GREB1     | 0.352947479 | mirna_pc |
| 2341 | hsa-mir-1-2 | THBS1     | 0.661768613 | mirna_pc |
| 2342 | hsa-mir-1-2 | ITPKB     | 0.600900361 | mirna_pc |
| 2343 | hsa-mir-1-2 | CD99L2    | 0.389211191 | mirna_pc |
| 2344 | hsa-mir-1-2 | IL1R1     | 0.389235319 | mirna_pc |
| 2345 | hsa-mir-1-2 | PPP1R12A  | 0.731356942 | mirna_pc |
| 2346 | hsa-mir-1-2 | PPM1M     | 0.324648785 | mirna_pc |
| 2347 | hsa-mir-1-2 | PITPNM3   | 0.450612256 | mirna_pc |
| 2348 | hsa-mir-1-2 | PALLD     | 0.774594394 | mirna_pc |
| 2349 | hsa-mir-1-2 | PKD2      | 0.611431906 | mirna_pc |
| 2350 | hsa-mir-1-2 | SMG6      | 0.339581767 | mirna_pc |
| 2351 | hsa-mir-1-2 | SLC8A1    | 0.643103772 | mirna_pc |
| 2352 | hsa-mir-1-2 | FBLN2     | 0.451616609 | mirna_pc |
| 2353 | hsa-mir-1-2 | NDN       | 0.339851909 | mirna_pc |
| 2354 | hsa-mir-1-2 | TCEAL4    | 0.389224816 | mirna_pc |
| 2355 | hsa-mir-1-2 | MAP1A     | 0.597206326 | mirna_pc |
| 2356 | hsa-mir-1-2 | MAP1B     | 0.556137368 | mirna_pc |
| 2357 | hsa-mir-1-2 | FAM184A   | 0.509077095 | mirna_pc |
| 2358 | hsa-mir-1-2 | RAB11FIP3 | 0.42093671  | mirna_pc |
| 2359 | hsa-mir-1-2 | CNTN1     | 0.369525126 | mirna_pc |
| 2360 | hsa-mir-1-2 | EID1      | 0.378725834 | mirna_pc |
| 2361 | hsa-mir-1-2 | ZNF154    | 0.47859031  | mirna_pc |
| 2362 | hsa-mir-1-2 | ATP8B2    | 0.479973017 | mirna_pc |
| 2363 | hsa-mir-1-2 | PRDM8     | 0.373793678 | mirna_pc |
| 2364 | hsa-mir-1-2 | CHURC1    | 0.354795765 | mirna_pc |
| 2365 | hsa-mir-1-2 | CTSO      | 0.372902674 | mirna_pc |
| 2366 | hsa-mir-1-2 | ZNF333    | 0.321099181 | mirna_pc |
| 2367 | hsa-mir-1-2 | PTPRS     | 0.311001925 | mirna_pc |
| 2368 | hsa-mir-1-2 | RERG      | 0.326019722 | mirna_pc |
| 2369 | hsa-mir-1-2 | MGP       | 0.487443542 | mirna_pc |
| 2370 | hsa-mir-1-2 | C9orf102  | 0.331737373 | mirna_pc |
| 2371 | hsa-mir-1-2 | NPTXR     | 0.302140613 | mirna_pc |
| 2372 | hsa-mir-1-2 | HECTD2    | 0.452852605 | mirna_pc |
| 2373 | hsa-mir-1-2 | CYTSA     | 0.328471171 | mirna_pc |
| 2374 | hsa-mir-1-2 | TTC23     | 0.410782786 | mirna_pc |
| 2375 | hsa-mir-1-2 | ZEB1      | 0.71002639  | mirna_pc |



|      |             |           |             |          |
|------|-------------|-----------|-------------|----------|
| 2376 | hsa-mir-1-2 | ARID5A    | 0.61061746  | mirna_pc |
| 2377 | hsa-mir-1-2 | AQP1      | 0.651778622 | mirna_pc |
| 2378 | hsa-mir-1-2 | TES       | 0.359173859 | mirna_pc |
| 2379 | hsa-mir-1-2 | COL4A6    | 0.591802849 | mirna_pc |
| 2380 | hsa-mir-1-2 | CD34      | 0.510125695 | mirna_pc |
| 2381 | hsa-mir-1-2 | RORA      | 0.325514824 | mirna_pc |
| 2382 | hsa-mir-1-2 | RGMA      | 0.546935973 | mirna_pc |
| 2383 | hsa-mir-1-2 | ELN       | 0.396695153 | mirna_pc |
| 2384 | hsa-mir-1-2 | SNCG      | 0.38543334  | mirna_pc |
| 2385 | hsa-mir-1-2 | ARHGAP31  | 0.416693135 | mirna_pc |
| 2386 | hsa-mir-1-2 | FOXO1     | 0.429872155 | mirna_pc |
| 2387 | hsa-mir-1-2 | MAP4      | 0.378279693 | mirna_pc |
| 2388 | hsa-mir-1-2 | ADAMTS9   | 0.45331312  | mirna_pc |
| 2389 | hsa-mir-1-2 | OCRL      | 0.324630443 | mirna_pc |
| 2390 | hsa-mir-1-2 | TMOD2     | 0.40603594  | mirna_pc |
| 2391 | hsa-mir-1-2 | WWC3      | 0.362609187 | mirna_pc |
| 2392 | hsa-mir-1-2 | SPRY1     | 0.482811234 | mirna_pc |
| 2393 | hsa-mir-1-2 | FAM46B    | 0.327145424 | mirna_pc |
| 2394 | hsa-mir-1-2 | CBX6      | 0.39892107  | mirna_pc |
| 2395 | hsa-mir-1-2 | BACE1     | 0.314909877 | mirna_pc |
| 2396 | hsa-mir-1-2 | PCDHGA12  | 0.500053457 | mirna_pc |
| 2397 | hsa-mir-1-2 | C10orf10  | 0.41032021  | mirna_pc |
| 2398 | hsa-mir-1-2 | SPEG      | 0.784284799 | mirna_pc |
| 2399 | hsa-mir-1-2 | FOXF2     | 0.652143347 | mirna_pc |
| 2400 | hsa-mir-1-2 | FBXO30    | 0.575939306 | mirna_pc |
| 2401 | hsa-mir-1-2 | EVC       | 0.470342201 | mirna_pc |
| 2402 | hsa-mir-1-2 | CNTNAP3   | 0.569330074 | mirna_pc |
| 2403 | hsa-mir-1-2 | GPR124    | 0.326279659 | mirna_pc |
| 2404 | hsa-mir-1-2 | ATF7      | 0.336740494 | mirna_pc |
| 2405 | hsa-mir-1-2 | ST3GAL3   | 0.325758358 | mirna_pc |
| 2406 | hsa-mir-1-2 | FIBIN     | 0.477251303 | mirna_pc |
| 2407 | hsa-mir-1-2 | ZFP36     | 0.317076887 | mirna_pc |
| 2408 | hsa-mir-1-2 | C3orf64   | 0.541007578 | mirna_pc |
| 2409 | hsa-mir-1-2 | MED13L    | 0.321645601 | mirna_pc |
| 2410 | hsa-mir-1-2 | PIK3R3    | 0.307867575 | mirna_pc |
| 2411 | hsa-mir-1-2 | LOC144571 | 0.510584855 | mirna_pc |
| 2412 | hsa-mir-1-2 | H6PD      | 0.322324192 | mirna_pc |
| 2413 | hsa-mir-1-2 | CLIC4     | 0.625277724 | mirna_pc |
| 2414 | hsa-mir-1-2 | CFH       | 0.480532079 | mirna_pc |
| 2415 | hsa-mir-1-2 | MEIS1     | 0.549473367 | mirna_pc |
| 2416 | hsa-mir-1-2 | ANKRD44   | 0.317934257 | mirna_pc |
| 2417 | hsa-mir-1-2 | C18orf1   | 0.431430462 | mirna_pc |
| 2418 | hsa-mir-1-2 | EPHA7     | 0.343899781 | mirna_pc |
| 2419 | hsa-mir-1-2 | RASA4     | 0.367363425 | mirna_pc |
| 2420 | hsa-mir-1-2 | PTGFR     | 0.454988538 | mirna_pc |
| 2421 | hsa-mir-1-2 | A2M       | 0.557421804 | mirna_pc |
| 2422 | hsa-mir-1-2 | FLNA      | 0.771979012 | mirna_pc |
| 2423 | hsa-mir-1-2 | KCTD10    | 0.639129478 | mirna_pc |
| 2424 | hsa-mir-1-2 | DGKG      | 0.585177218 | mirna_pc |
| 2425 | hsa-mir-1-2 | PHLDB1    | 0.399500234 | mirna_pc |
| 2426 | hsa-mir-1-2 | RABGAP1   | 0.43128492  | mirna_pc |
| 2427 | hsa-mir-1-2 | LATS2     | 0.537376731 | mirna_pc |
| 2428 | hsa-mir-1-2 | C14orf45  | 0.328706995 | mirna_pc |
| 2429 | hsa-mir-1-2 | ACTC1     | 0.451946274 | mirna_pc |

|      |             |          |             |          |
|------|-------------|----------|-------------|----------|
| 2430 | hsa-mir-1-2 | EBF4     | 0.347921795 | mirna_pc |
| 2431 | hsa-mir-1-2 | SAMHD1   | 0.522380498 | mirna_pc |
| 2432 | hsa-mir-1-2 | TMTC1    | 0.317001563 | mirna_pc |
| 2433 | hsa-mir-1-2 | PCOLCE2  | 0.427169879 | mirna_pc |
| 2434 | hsa-mir-1-2 | AXL      | 0.347180622 | mirna_pc |
| 2435 | hsa-mir-1-2 | FAM168A  | 0.325490159 | mirna_pc |
| 2436 | hsa-mir-1-2 | CCDC50   | 0.316018288 | mirna_pc |
| 2437 | hsa-mir-1-2 | ANKRD13A | 0.332101116 | mirna_pc |
| 2438 | hsa-mir-1-2 | ARHGEF17 | 0.574106306 | mirna_pc |
| 2439 | hsa-mir-1-2 | ADAMTS5  | 0.370118474 | mirna_pc |
| 2440 | hsa-mir-1-2 | DAAM1    | 0.362258685 | mirna_pc |
| 2441 | hsa-mir-1-2 | GPC6     | 0.406091756 | mirna_pc |
| 2442 | hsa-mir-1-2 | TYRP1    | 0.359216778 | mirna_pc |
| 2443 | hsa-mir-1-2 | COL4A5   | 0.33194511  | mirna_pc |
| 2444 | hsa-mir-1-2 | PKIG     | 0.555167872 | mirna_pc |
| 2445 | hsa-mir-1-2 | GEM      | 0.393449434 | mirna_pc |
| 2446 | hsa-mir-1-2 | FAM20C   | 0.340756111 | mirna_pc |
| 2447 | hsa-mir-1-2 | VWF      | 0.321441744 | mirna_pc |
| 2448 | hsa-mir-1-2 | ALDH1B1  | 0.569449282 | mirna_pc |
| 2449 | hsa-mir-1-2 | C6orf145 | 0.30825619  | mirna_pc |
| 2450 | hsa-mir-1-2 | KIAA1614 | 0.345523406 | mirna_pc |
| 2451 | hsa-mir-1-2 | C4orf3   | 0.300760749 | mirna_pc |
| 2452 | hsa-mir-1-2 | SYT11    | 0.356006    | mirna_pc |
| 2453 | hsa-mir-1-2 | MYL6     | 0.419722223 | mirna_pc |
| 2454 | hsa-mir-1-2 | PLEKH02  | 0.555602005 | mirna_pc |
| 2455 | hsa-mir-1-2 | ERG      | 0.303284139 | mirna_pc |
| 2456 | hsa-mir-1-2 | CSPG4    | 0.349531727 | mirna_pc |
| 2457 | hsa-mir-1-2 | OLFML1   | 0.419376062 | mirna_pc |
| 2458 | hsa-mir-1-2 | OLFML3   | 0.353994665 | mirna_pc |
| 2459 | hsa-mir-1-2 | NEK9     | 0.440531643 | mirna_pc |
| 2460 | hsa-mir-1-2 | CEP68    | 0.359138683 | mirna_pc |
| 2461 | hsa-mir-1-2 | ARSB     | 0.517078213 | mirna_pc |
| 2462 | hsa-mir-1-2 | MYADM    | 0.322062837 | mirna_pc |
| 2463 | hsa-mir-1-2 | THBS3    | 0.518750461 | mirna_pc |
| 2464 | hsa-mir-1-2 | PECAM1   | 0.353693825 | mirna_pc |
| 2465 | hsa-mir-1-2 | TSPAN18  | 0.374259683 | mirna_pc |
| 2466 | hsa-mir-1-2 | WWTR1    | 0.604253913 | mirna_pc |
| 2467 | hsa-mir-1-2 | GFPT2    | 0.303402997 | mirna_pc |
| 2468 | hsa-mir-1-2 | CCDC3    | 0.351831756 | mirna_pc |
| 2469 | hsa-mir-1-2 | CCDC136  | 0.454709053 | mirna_pc |
| 2470 | hsa-mir-1-2 | DENND5A  | 0.50529229  | mirna_pc |
| 2471 | hsa-mir-1-2 | PHF21A   | 0.316097472 | mirna_pc |
| 2472 | hsa-mir-1-2 | SSPN     | 0.497366032 | mirna_pc |
| 2473 | hsa-mir-1-2 | IGSF9B   | 0.575593764 | mirna_pc |
| 2474 | hsa-mir-1-2 | GABBR1   | 0.387291213 | mirna_pc |
| 2475 | hsa-mir-1-2 | ATXN1    | 0.326141283 | mirna_pc |
| 2476 | hsa-mir-1-2 | KIF1B    | 0.342282517 | mirna_pc |
| 2477 | hsa-mir-1-2 | ECSCR    | 0.390795769 | mirna_pc |
| 2478 | hsa-mir-1-2 | JAZF1    | 0.461218363 | mirna_pc |
| 2479 | hsa-mir-1-2 | HSPG2    | 0.40249712  | mirna_pc |
| 2480 | hsa-mir-1-2 | CDK17    | 0.481106889 | mirna_pc |
| 2481 | hsa-mir-1-2 | MATN2    | 0.386259088 | mirna_pc |
| 2482 | hsa-mir-1-2 | ZFHX3    | 0.307605813 | mirna_pc |
| 2483 | hsa-mir-1-2 | LIX1L    | 0.43153256  | mirna_pc |

|                  |           |                      |
|------------------|-----------|----------------------|
| 2484 hsa-mir-1-2 | RBM9      | 0.48428026 mirna_pc  |
| 2485 hsa-mir-1-2 | FAM124A   | 0.651992835 mirna_pc |
| 2486 hsa-mir-1-2 | SELM      | 0.500836672 mirna_pc |
| 2487 hsa-mir-1-2 | AMOTL1    | 0.527304919 mirna_pc |
| 2488 hsa-mir-1-2 | KIAA1377  | 0.343826135 mirna_pc |
| 2489 hsa-mir-1-2 | HSPA2     | 0.451897287 mirna_pc |
| 2490 hsa-mir-1-2 | MCAM      | 0.564217602 mirna_pc |
| 2491 hsa-mir-1-2 | LHFP      | 0.50635315 mirna_pc  |
| 2492 hsa-mir-1-2 | IGSF1     | 0.323123593 mirna_pc |
| 2493 hsa-mir-1-2 | LOC653653 | 0.604277297 mirna_pc |
| 2494 hsa-mir-1-2 | SHANK3    | 0.368452171 mirna_pc |
| 2495 hsa-mir-1-2 | SCARA3    | 0.316694174 mirna_pc |
| 2496 hsa-mir-1-2 | RNF122    | 0.386701313 mirna_pc |
| 2497 hsa-mir-1-2 | PRDM11    | 0.311689341 mirna_pc |
| 2498 hsa-mir-1-2 | GPR135    | 0.462694829 mirna_pc |
| 2499 hsa-mir-1-2 | SVIL      | 0.791004158 mirna_pc |
| 2500 hsa-mir-1-2 | TOX2      | 0.358359075 mirna_pc |
| 2501 hsa-mir-1-2 | WHAMML1   | 0.48655235 mirna_pc  |
| 2502 hsa-mir-1-2 | AKT3      | 0.483777318 mirna_pc |
| 2503 hsa-mir-1-2 | CDH5      | 0.350493774 mirna_pc |
| 2504 hsa-mir-1-2 | VCL       | 0.620737772 mirna_pc |
| 2505 hsa-mir-1-2 | ANTXR2    | 0.415656795 mirna_pc |
| 2506 hsa-mir-1-2 | PALMD     | 0.311349406 mirna_pc |
| 2507 hsa-mir-1-2 | NT5DC3    | 0.50497853 mirna_pc  |
| 2508 hsa-mir-1-2 | TIE1      | 0.396373695 mirna_pc |
| 2509 hsa-mir-1-2 | ZNF34     | 0.315595135 mirna_pc |
| 2510 hsa-mir-1-2 | TBC1D1    | 0.501143937 mirna_pc |
| 2511 hsa-mir-1-2 | MEF2C     | 0.431355795 mirna_pc |
| 2512 hsa-mir-1-2 | PMP22     | 0.458259954 mirna_pc |
| 2513 hsa-mir-1-2 | ST8SIA1   | 0.309538451 mirna_pc |
| 2514 hsa-mir-1-2 | NUDT4     | 0.381163625 mirna_pc |
| 2515 hsa-mir-1-2 | ITGA1     | 0.437757209 mirna_pc |
| 2516 hsa-mir-1-2 | TBX5      | 0.398773827 mirna_pc |
| 2517 hsa-mir-1-2 | STX2      | 0.34458735 mirna_pc  |
| 2518 hsa-mir-1-2 | CCDC46    | 0.445044113 mirna_pc |
| 2519 hsa-mir-1-2 | PDE3A     | 0.670032502 mirna_pc |
| 2520 hsa-mir-1-2 | PTRF      | 0.508871495 mirna_pc |
| 2521 hsa-mir-1-2 | LRRC32    | 0.32390858 mirna_pc  |
| 2522 hsa-mir-1-2 | SORCS2    | 0.425729489 mirna_pc |
| 2523 hsa-mir-1-2 | PLSCR4    | 0.391346645 mirna_pc |
| 2524 hsa-mir-1-2 | CRIM1     | 0.373763762 mirna_pc |
| 2525 hsa-mir-1-2 | NPR 2.00  | 0.301049047 mirna_pc |
| 2526 hsa-mir-1-2 | CRIP2     | 0.300128848 mirna_pc |
| 2527 hsa-mir-1-2 | TSHZ3     | 0.453642487 mirna_pc |
| 2528 hsa-mir-1-2 | RASL11A   | 0.320473305 mirna_pc |
| 2529 hsa-mir-1-2 | LHX6      | 0.356444614 mirna_pc |
| 2530 hsa-mir-1-2 | CAMK2G    | 0.517350201 mirna_pc |
| 2531 hsa-mir-1-2 | CAMK1     | 0.329021766 mirna_pc |
| 2532 hsa-mir-1-2 | CMYA5     | 0.336039812 mirna_pc |
| 2533 hsa-mir-1-2 | FAM127C   | 0.326099546 mirna_pc |
| 2534 hsa-mir-1-2 | HSPA12B   | 0.40044793 mirna_pc  |
| 2535 hsa-mir-1-2 | C14orf4   | 0.346753609 mirna_pc |
| 2536 hsa-mir-1-2 | KLF10     | 0.310751363 mirna_pc |
| 2537 hsa-mir-1-2 | CD93      | 0.324073818 mirna_pc |

|      |             |          |             |          |
|------|-------------|----------|-------------|----------|
| 2538 | hsa-mir-1-2 | SERPINF1 | 0.399069785 | mirna_pc |
| 2539 | hsa-mir-1-2 | C3       | 0.342294512 | mirna_pc |
| 2540 | hsa-mir-1-2 | DPYSL3   | 0.688778488 | mirna_pc |
| 2541 | hsa-mir-1-2 | KIAA0355 | 0.332327203 | mirna_pc |
| 2542 | hsa-mir-1-2 | ATP2B4   | 0.669863353 | mirna_pc |
| 2543 | hsa-mir-1-2 | PROS1    | 0.45176612  | mirna_pc |
| 2544 | hsa-mir-1-2 | DDX24    | 0.30987146  | mirna_pc |
| 2545 | hsa-mir-1-2 | TIMP2    | 0.395257058 | mirna_pc |
| 2546 | hsa-mir-1-2 | FBN1     | 0.457770286 | mirna_pc |
| 2547 | hsa-mir-1-2 | ADH5     | 0.363645427 | mirna_pc |
| 2548 | hsa-mir-1-2 | SHROOM4  | 0.346667908 | mirna_pc |
| 2549 | hsa-mir-1-2 | NOD1     | 0.307863298 | mirna_pc |
| 2550 | hsa-mir-1-2 | AP1S2    | 0.588376568 | mirna_pc |
| 2551 | hsa-mir-1-2 | DOCK1    | 0.357474365 | mirna_pc |
| 2552 | hsa-mir-1-2 | KLC1     | 0.312740741 | mirna_pc |
| 2553 | hsa-mir-1-2 | CREM     | 0.341094005 | mirna_pc |
| 2554 | hsa-mir-1-2 | MXRA7    | 0.415048317 | mirna_pc |
| 2555 | hsa-mir-1-2 | IFFO1    | 0.361111014 | mirna_pc |
| 2556 | hsa-mir-1-2 | C5orf36  | 0.338209422 | mirna_pc |
| 2557 | hsa-mir-1-2 | PCNX     | 0.389484158 | mirna_pc |
| 2558 | hsa-mir-1-2 | C1RL     | 0.339516087 | mirna_pc |
| 2559 | hsa-mir-1-2 | MEOX1    | 0.490432126 | mirna_pc |
| 2560 | hsa-mir-1-2 | TTBK2    | 0.356416658 | mirna_pc |
| 2561 | hsa-mir-1-2 | ADCY9    | 0.484762434 | mirna_pc |
| 2562 | hsa-mir-1-2 | RASD2    | 0.510216293 | mirna_pc |
| 2563 | hsa-mir-1-2 | CD81     | 0.329018801 | mirna_pc |
| 2564 | hsa-mir-1-2 | VIM      | 0.339672157 | mirna_pc |
| 2565 | hsa-mir-1-2 | MN1      | 0.3257003   | mirna_pc |
| 2566 | hsa-mir-1-2 | SDC3     | 0.395499253 | mirna_pc |
| 2567 | hsa-mir-1-2 | PNMA1    | 0.334824852 | mirna_pc |
| 2568 | hsa-mir-1-2 | FAM83D   | 0.510379155 | mirna_pc |
| 2569 | hsa-mir-1-2 | ZAK      | 0.696383403 | mirna_pc |
| 2570 | hsa-mir-1-2 | IGFBP4   | 0.323297574 | mirna_pc |
| 2571 | hsa-mir-1-2 | RAB23    | 0.480641311 | mirna_pc |
| 2572 | hsa-mir-1-2 | LTBP1    | 0.374384203 | mirna_pc |
| 2573 | hsa-mir-1-2 | DOCK11   | 0.443010719 | mirna_pc |
| 2574 | hsa-mir-1-2 | MAP3K14  | 0.332745956 | mirna_pc |
| 2575 | hsa-mir-1-2 | STAB1    | 0.328100186 | mirna_pc |
| 2576 | hsa-mir-1-2 | TM6SF1   | 0.334058323 | mirna_pc |
| 2577 | hsa-mir-1-2 | EHBP1L1  | 0.378154771 | mirna_pc |
| 2578 | hsa-mir-1-2 | FLJ42709 | 0.402197432 | mirna_pc |
| 2579 | hsa-mir-1-2 | TUBA1A   | 0.543345051 | mirna_pc |
| 2580 | hsa-mir-1-2 | ELTD1    | 0.322997337 | mirna_pc |
| 2581 | hsa-mir-1-2 | SERPING1 | 0.390065618 | mirna_pc |
| 2582 | hsa-mir-1-2 | GFOD1    | 0.437424839 | mirna_pc |
| 2583 | hsa-mir-1-2 | LRP1     | 0.392650124 | mirna_pc |
| 2584 | hsa-mir-1-2 | ADAMTS4  | 0.356383001 | mirna_pc |
| 2585 | hsa-mir-1-2 | FTO      | 0.35054441  | mirna_pc |
| 2586 | hsa-mir-1-2 | ATL3     | 0.31930911  | mirna_pc |
| 2587 | hsa-mir-1-2 | MAP3K12  | 0.338999453 | mirna_pc |
| 2588 | hsa-mir-1-2 | COL15A1  | 0.31754362  | mirna_pc |
| 2589 | hsa-mir-1-2 | RHOQ     | 0.345917599 | mirna_pc |
| 2590 | hsa-mir-1-2 | ADAMTS10 | 0.365449536 | mirna_pc |
| 2591 | hsa-mir-1-2 | CRTC3    | 0.407266732 | mirna_pc |

|      |             |          |             |          |
|------|-------------|----------|-------------|----------|
| 2592 | hsa-mir-1-2 | SFRP2    | 0.398082671 | mirna_pc |
| 2593 | hsa-mir-1-2 | NCS1     | 0.512759886 | mirna_pc |
| 2594 | hsa-mir-1-2 | SACS     | 0.433965421 | mirna_pc |
| 2595 | hsa-mir-1-2 | SEC23A   | 0.384517147 | mirna_pc |
| 2596 | hsa-mir-1-2 | LAMA4    | 0.404736713 | mirna_pc |
| 2597 | hsa-mir-1-2 | PCDHGA6  | 0.316952768 | mirna_pc |
| 2598 | hsa-mir-1-2 | PTPLAD2  | 0.327349348 | mirna_pc |
| 2599 | hsa-mir-1-2 | CDC42EP3 | 0.325956659 | mirna_pc |
| 2600 | hsa-mir-1-2 | HSPA12A  | 0.416675713 | mirna_pc |
| 2601 | hsa-mir-1-2 | GREM1    | 0.452026607 | mirna_pc |
| 2602 | hsa-mir-1-2 | SESTD1   | 0.313641397 | mirna_pc |
| 2603 | hsa-mir-1-2 | HMCN1    | 0.61546874  | mirna_pc |
| 2604 | hsa-mir-1-2 | TEAD3    | 0.415759968 | mirna_pc |
| 2605 | hsa-mir-1-2 | ENTPD1   | 0.381826113 | mirna_pc |
| 2606 | hsa-mir-1-2 | ECM2     | 0.414202574 | mirna_pc |
| 2607 | hsa-mir-1-2 | NRP2     | 0.482679185 | mirna_pc |
| 2608 | hsa-mir-1-2 | BMPR2    | 0.31982592  | mirna_pc |
| 2609 | hsa-mir-1-2 | ANO6     | 0.397672765 | mirna_pc |
| 2610 | hsa-mir-1-2 | RAB30    | 0.320075909 | mirna_pc |
| 2611 | hsa-mir-1-2 | IGFBP7   | 0.324333554 | mirna_pc |
| 2612 | hsa-mir-1-2 | RGL1     | 0.382947902 | mirna_pc |
| 2613 | hsa-mir-1-2 | COL6A2   | 0.335010247 | mirna_pc |
| 2614 | hsa-mir-1-2 | FSTL1    | 0.40064072  | mirna_pc |
| 2615 | hsa-mir-1-2 | PLEKH01  | 0.51928756  | mirna_pc |
| 2616 | hsa-mir-1-2 | TWSG1    | 0.301693479 | mirna_pc |
| 2617 | hsa-mir-1-2 | KLHDC5   | 0.366190054 | mirna_pc |
| 2618 | hsa-mir-1-2 | DYSF     | 0.383960595 | mirna_pc |
| 2619 | hsa-mir-1-2 | BCL6     | 0.363528267 | mirna_pc |
| 2620 | hsa-mir-1-2 | EHD2     | 0.358588211 | mirna_pc |
| 2621 | hsa-mir-1-2 | TCP11L1  | 0.327306605 | mirna_pc |
| 2622 | hsa-mir-1-2 | NFIL3    | 0.386886389 | mirna_pc |
| 2623 | hsa-mir-1-2 | TMEM43   | 0.365968884 | mirna_pc |
| 2624 | hsa-mir-1-2 | HEG1     | 0.300694384 | mirna_pc |
| 2625 | hsa-mir-1-2 | SLC4A3   | 0.438272026 | mirna_pc |
| 2626 | hsa-mir-1-2 | TSPAN4   | 0.302975548 | mirna_pc |
| 2627 | hsa-mir-1-2 | AFAP1    | 0.329047998 | mirna_pc |
| 2628 | hsa-mir-1-2 | FAM198B  | 0.30333088  | mirna_pc |
| 2629 | hsa-mir-1-2 | C4A      | 0.369242663 | mirna_pc |
| 2630 | hsa-mir-1-2 | CAP2     | 0.599515846 | mirna_pc |
| 2631 | hsa-mir-1-2 | SOCS3    | 0.398384352 | mirna_pc |
| 2632 | hsa-mir-1-2 | BICC1    | 0.342243471 | mirna_pc |
| 2633 | hsa-mir-1-2 | NDE1     | 0.349146158 | mirna_pc |
| 2634 | hsa-mir-1-2 | SH3PXD2B | 0.38128591  | mirna_pc |
| 2635 | hsa-mir-1-2 | HOXA4    | 0.414366165 | mirna_pc |
| 2636 | hsa-mir-1-2 | C1R      | 0.405710481 | mirna_pc |
| 2637 | hsa-mir-1-2 | PRKG2    | 0.502063593 | mirna_pc |
| 2638 | hsa-mir-1-2 | MAP7D3   | 0.325808944 | mirna_pc |
| 2639 | hsa-mir-1-2 | KATNAL1  | 0.41026245  | mirna_pc |
| 2640 | hsa-mir-1-2 | STOM     | 0.393887528 | mirna_pc |
| 2641 | hsa-mir-1-2 | KCTD20   | 0.314861566 | mirna_pc |
| 2642 | hsa-mir-1-2 | PDLIM7   | 0.339144598 | mirna_pc |
| 2643 | hsa-mir-1-2 | NLGN2    | 0.36915598  | mirna_pc |
| 2644 | hsa-mir-1-2 | SYDE1    | 0.338673914 | mirna_pc |
| 2645 | hsa-mir-1-2 | NKX6-1   | 0.662344372 | mirna_pc |

|      |             |           |             |          |
|------|-------------|-----------|-------------|----------|
| 2646 | hsa-mir-1-2 | FAM49A    | 0.330783029 | mirna_pc |
| 2647 | hsa-mir-1-2 | ACTN1     | 0.437973394 | mirna_pc |
| 2648 | hsa-mir-1-2 | ARMC9     | 0.460298689 | mirna_pc |
| 2649 | hsa-mir-1-2 | GUCY1B3   | 0.516710179 | mirna_pc |
| 2650 | hsa-mir-1-2 | FBX032    | 0.588689544 | mirna_pc |
| 2651 | hsa-mir-1-2 | KLHL5     | 0.369879398 | mirna_pc |
| 2652 | hsa-mir-1-2 | MFGE8     | 0.324891823 | mirna_pc |
| 2653 | hsa-mir-1-2 | GBP2      | 0.309647261 | mirna_pc |
| 2654 | hsa-mir-1-2 | GUCY1A3   | 0.52573768  | mirna_pc |
| 2655 | hsa-mir-93  | MKI67     | 0.410994961 | mirna_pc |
| 2656 | hsa-mir-93  | TPX2      | 0.402634073 | mirna_pc |
| 2657 | hsa-mir-93  | KIF4B     | 0.403994306 | mirna_pc |
| 2658 | hsa-mir-93  | CENPF     | 0.561994517 | mirna_pc |
| 2659 | hsa-mir-93  | RCC2      | 0.442097426 | mirna_pc |
| 2660 | hsa-mir-93  | HOXC9     | 0.308360338 | mirna_pc |
| 2661 | hsa-mir-93  | KIF11     | 0.513668196 | mirna_pc |
| 2662 | hsa-mir-93  | ECT2      | 0.34730559  | mirna_pc |
| 2663 | hsa-mir-93  | FOXO1     | 0.433938631 | mirna_pc |
| 2664 | hsa-mir-93  | RRM2      | 0.388208848 | mirna_pc |
| 2665 | hsa-mir-93  | CDK1      | 0.402189799 | mirna_pc |
| 2666 | hsa-mir-93  | CDC25C    | 0.345485886 | mirna_pc |
| 2667 | hsa-mir-93  | MYBL2     | 0.322855884 | mirna_pc |
| 2668 | hsa-mir-93  | PLK1      | 0.336120715 | mirna_pc |
| 2669 | hsa-mir-93  | UBE2C     | 0.378031655 | mirna_pc |
| 2670 | hsa-mir-93  | BUB1      | 0.441478462 | mirna_pc |
| 2671 | hsa-mir-93  | PRC1      | 0.309449589 | mirna_pc |
| 2672 | hsa-mir-93  | NUSAP1    | 0.440660956 | mirna_pc |
| 2673 | hsa-mir-93  | MCM4      | 0.387885928 | mirna_pc |
| 2674 | hsa-mir-93  | KIFC1     | 0.400632547 | mirna_pc |
| 2675 | hsa-mir-93  | BUB1B     | 0.463290478 | mirna_pc |
| 2676 | hsa-mir-93  | HDGF      | 0.397890846 | mirna_pc |
| 2677 | hsa-mir-93  | KIF18B    | 0.394484213 | mirna_pc |
| 2678 | hsa-mir-93  | ASPM      | 0.493842882 | mirna_pc |
| 2679 | hsa-mir-93  | KIF2C     | 0.418724958 | mirna_pc |
| 2680 | hsa-mir-93  | FANCA     | 0.407183495 | mirna_pc |
| 2681 | hsa-mir-93  | NCAPG     | 0.470704621 | mirna_pc |
| 2682 | hsa-mir-93  | CLSPN     | 0.354703391 | mirna_pc |
| 2683 | hsa-mir-93  | SGOL1     | 0.429191773 | mirna_pc |
| 2684 | hsa-mir-93  | ARHGAP11A | 0.37028841  | mirna_pc |
| 2685 | hsa-mir-93  | CCNA2     | 0.542367035 | mirna_pc |
| 2686 | hsa-mir-93  | SPC25     | 0.461076438 | mirna_pc |
| 2687 | hsa-mir-93  | NUP62     | 0.358719934 | mirna_pc |
| 2688 | hsa-mir-93  | FANCI     | 0.445637728 | mirna_pc |
| 2689 | hsa-mir-93  | NEK2      | 0.518349239 | mirna_pc |
| 2690 | hsa-mir-93  | MND1      | 0.566637412 | mirna_pc |
| 2691 | hsa-mir-93  | KIF22     | 0.407644542 | mirna_pc |
| 2692 | hsa-mir-93  | NCAPH     | 0.491201941 | mirna_pc |
| 2693 | hsa-mir-93  | GTSE1     | 0.424296585 | mirna_pc |
| 2694 | hsa-mir-93  | KIF23     | 0.366394046 | mirna_pc |
| 2695 | hsa-mir-93  | RAD54L    | 0.530395434 | mirna_pc |
| 2696 | hsa-mir-93  | CENPA     | 0.418846898 | mirna_pc |
| 2697 | hsa-mir-93  | MAD2L1    | 0.57910927  | mirna_pc |
| 2698 | hsa-mir-93  | TIMELESS  | 0.562256616 | mirna_pc |
| 2699 | hsa-mir-93  | LMNB1     | 0.490145061 | mirna_pc |

|                 |         |                      |
|-----------------|---------|----------------------|
| 2700 hsa-mir-93 | ASF1B   | 0.319749275 mirna_pc |
| 2701 hsa-mir-93 | CDCA8   | 0.403889521 mirna_pc |
| 2702 hsa-mir-93 | TROAP   | 0.46797362 mirna_pc  |
| 2703 hsa-mir-93 | CDCA5   | 0.421329844 mirna_pc |
| 2704 hsa-mir-93 | TACC3   | 0.324158387 mirna_pc |
| 2705 hsa-mir-93 | XPO1    | 0.546233201 mirna_pc |
| 2706 hsa-mir-93 | CDC45   | 0.341135545 mirna_pc |
| 2707 hsa-mir-93 | STMN1   | 0.464731377 mirna_pc |
| 2708 hsa-mir-93 | EXO1    | 0.429790253 mirna_pc |
| 2709 hsa-mir-93 | CDCA2   | 0.44079886 mirna_pc  |
| 2710 hsa-mir-93 | STIL    | 0.318877517 mirna_pc |
| 2711 hsa-mir-93 | DKC1    | 0.308423278 mirna_pc |
| 2712 hsa-mir-93 | UBE2T   | 0.317487677 mirna_pc |
| 2713 hsa-mir-93 | CKS1B   | 0.36008901 mirna_pc  |
| 2714 hsa-mir-93 | TUBB    | 0.393769715 mirna_pc |
| 2715 hsa-mir-93 | MCM2    | 0.401463068 mirna_pc |
| 2716 hsa-mir-93 | KIF4A   | 0.374971432 mirna_pc |
| 2717 hsa-mir-93 | ORC1L   | 0.453559815 mirna_pc |
| 2718 hsa-mir-93 | KNTC1   | 0.488872044 mirna_pc |
| 2719 hsa-mir-93 | UHRF1   | 0.323503672 mirna_pc |
| 2720 hsa-mir-93 | CCNF    | 0.443407897 mirna_pc |
| 2721 hsa-mir-93 | CENPI   | 0.313260229 mirna_pc |
| 2722 hsa-mir-93 | CCNB2   | 0.354526588 mirna_pc |
| 2723 hsa-mir-93 | NUF2    | 0.528385926 mirna_pc |
| 2724 hsa-mir-93 | SFRP1   | 0.490130907 mirna_pc |
| 2725 hsa-mir-93 | PLK4    | 0.643624659 mirna_pc |
| 2726 hsa-mir-93 | FANCB   | 0.448170435 mirna_pc |
| 2727 hsa-mir-93 | KIF18A  | 0.439750982 mirna_pc |
| 2728 hsa-mir-93 | DEPDC1  | 0.480982292 mirna_pc |
| 2729 hsa-mir-93 | SKA3    | 0.337269797 mirna_pc |
| 2730 hsa-mir-93 | KIF14   | 0.448474841 mirna_pc |
| 2731 hsa-mir-93 | HJURP   | 0.428525921 mirna_pc |
| 2732 hsa-mir-93 | SKA1    | 0.365262453 mirna_pc |
| 2733 hsa-mir-93 | RAD51   | 0.383642154 mirna_pc |
| 2734 hsa-mir-93 | BLM     | 0.468197376 mirna_pc |
| 2735 hsa-mir-93 | CAPN6   | 0.30696615 mirna_pc  |
| 2736 hsa-mir-93 | CKAP2L  | 0.343519608 mirna_pc |
| 2737 hsa-mir-93 | DNMT1   | 0.392813651 mirna_pc |
| 2738 hsa-mir-93 | PAICS   | 0.420130811 mirna_pc |
| 2739 hsa-mir-93 | CCDC150 | 0.459766879 mirna_pc |
| 2740 hsa-mir-93 | BIRC5   | 0.338240437 mirna_pc |
| 2741 hsa-mir-93 | LIG1    | 0.436427448 mirna_pc |
| 2742 hsa-mir-93 | OIP5    | 0.334679849 mirna_pc |
| 2743 hsa-mir-93 | DTL     | 0.606954586 mirna_pc |
| 2744 hsa-mir-93 | EME1    | 0.427124597 mirna_pc |
| 2745 hsa-mir-93 | RECQL4  | 0.365666172 mirna_pc |
| 2746 hsa-mir-93 | AURKA   | 0.358619844 mirna_pc |
| 2747 hsa-mir-93 | CENPK   | 0.401363522 mirna_pc |
| 2748 hsa-mir-93 | AURKB   | 0.470490111 mirna_pc |
| 2749 hsa-mir-93 | GSG2    | 0.419358854 mirna_pc |
| 2750 hsa-mir-93 | MCM10   | 0.498624093 mirna_pc |
| 2751 hsa-mir-93 | SGOL2   | 0.465141679 mirna_pc |
| 2752 hsa-mir-93 | CHEK2   | 0.392350018 mirna_pc |
| 2753 hsa-mir-93 | CENPE   | 0.434601651 mirna_pc |

|                 |           |                      |
|-----------------|-----------|----------------------|
| 2754 hsa-mir-93 | POLQ      | 0.433466485 mirna_pc |
| 2755 hsa-mir-93 | KIF15     | 0.501347468 mirna_pc |
| 2756 hsa-mir-93 | CDCA3     | 0.472458654 mirna_pc |
| 2757 hsa-mir-93 | C1orf112  | 0.593068142 mirna_pc |
| 2758 hsa-mir-93 | GINS1     | 0.414223861 mirna_pc |
| 2759 hsa-mir-93 | FEN1      | 0.32734168 mirna_pc  |
| 2760 hsa-mir-93 | TRAIP     | 0.332208969 mirna_pc |
| 2761 hsa-mir-93 | ORC6L     | 0.418793306 mirna_pc |
| 2762 hsa-mir-93 | PBK       | 0.359360886 mirna_pc |
| 2763 hsa-mir-93 | C16orf59  | 0.465322894 mirna_pc |
| 2764 hsa-mir-93 | C17orf53  | 0.331161129 mirna_pc |
| 2765 hsa-mir-93 | FAM72B    | 0.328402472 mirna_pc |
| 2766 hsa-mir-93 | NEIL3     | 0.539851672 mirna_pc |
| 2767 hsa-mir-93 | MCM7      | 0.668690584 mirna_pc |
| 2768 hsa-mir-93 | ACTL6A    | 0.330746085 mirna_pc |
| 2769 hsa-mir-93 | POLD1     | 0.345779724 mirna_pc |
| 2770 hsa-mir-93 | C12orf48  | 0.472548958 mirna_pc |
| 2771 hsa-mir-93 | HNRNPL    | 0.385784911 mirna_pc |
| 2772 hsa-mir-93 | ZWILCH    | 0.340414305 mirna_pc |
| 2773 hsa-mir-93 | SMC4      | 0.431134966 mirna_pc |
| 2774 hsa-mir-93 | HMMR      | 0.326755455 mirna_pc |
| 2775 hsa-mir-93 | PKMYT1    | 0.32199815 mirna_pc  |
| 2776 hsa-mir-93 | TTK       | 0.41972873 mirna_pc  |
| 2777 hsa-mir-93 | ZWINT     | 0.34896858 mirna_pc  |
| 2778 hsa-mir-93 | HOXC6     | 0.308058423 mirna_pc |
| 2779 hsa-mir-93 | BUB3      | 0.312237569 mirna_pc |
| 2780 hsa-mir-93 | RAD51AP1  | 0.367717051 mirna_pc |
| 2781 hsa-mir-93 | HELLS     | 0.46212272 mirna_pc  |
| 2782 hsa-mir-93 | ERCC6L    | 0.301036961 mirna_pc |
| 2783 hsa-mir-93 | NCAPD2    | 0.529137191 mirna_pc |
| 2784 hsa-mir-93 | ILF2      | 0.322812095 mirna_pc |
| 2785 hsa-mir-93 | TCF3      | 0.304015957 mirna_pc |
| 2786 hsa-mir-93 | C6orf167  | 0.477810203 mirna_pc |
| 2787 hsa-mir-93 | BRCA1     | 0.408198826 mirna_pc |
| 2788 hsa-mir-93 | MCM5      | 0.317567473 mirna_pc |
| 2789 hsa-mir-93 | HNRNPA2B1 | 0.379224299 mirna_pc |
| 2790 hsa-mir-93 | TYMS      | 0.321497019 mirna_pc |
| 2791 hsa-mir-93 | RFWD3     | 0.330861765 mirna_pc |
| 2792 hsa-mir-93 | MCM6      | 0.550114717 mirna_pc |
| 2793 hsa-mir-93 | CDCA7     | 0.387510414 mirna_pc |
| 2794 hsa-mir-93 | EPRI      | 0.387737961 mirna_pc |
| 2795 hsa-mir-93 | KIAA1524  | 0.468486475 mirna_pc |
| 2796 hsa-mir-93 | BRIP1     | 0.478279183 mirna_pc |
| 2797 hsa-mir-93 | PIF1      | 0.343296434 mirna_pc |
| 2798 hsa-mir-93 | SFRS2     | 0.341883765 mirna_pc |
| 2799 hsa-mir-93 | UCK2      | 0.453148813 mirna_pc |
| 2800 hsa-mir-93 | NFKBIL2   | 0.425018391 mirna_pc |
| 2801 hsa-mir-93 | C15orf42  | 0.485043598 mirna_pc |
| 2802 hsa-mir-93 | PRIM2     | 0.322554869 mirna_pc |
| 2803 hsa-mir-93 | FAM60A    | 0.41188629 mirna_pc  |
| 2804 hsa-mir-93 | FAM64A    | 0.359003978 mirna_pc |
| 2805 hsa-mir-93 | ATAD5     | 0.503766902 mirna_pc |
| 2806 hsa-mir-93 | MTBP      | 0.364348916 mirna_pc |
| 2807 hsa-mir-93 | FAM111B   | 0.338859248 mirna_pc |



|                 |          |                      |
|-----------------|----------|----------------------|
| 2808 hsa-mir-93 | KIF20B   | 0.427543979 mirna_pc |
| 2809 hsa-mir-93 | ESCO2    | 0.397791827 mirna_pc |
| 2810 hsa-mir-93 | SNRPA    | 0.357618198 mirna_pc |
| 2811 hsa-mir-93 | FUS      | 0.425178501 mirna_pc |
| 2812 hsa-mir-93 | ATAD2    | 0.356648071 mirna_pc |
| 2813 hsa-mir-93 | DNAJC9   | 0.327477674 mirna_pc |
| 2814 hsa-mir-93 | U2AF2    | 0.372190664 mirna_pc |
| 2815 hsa-mir-93 | RFC3     | 0.315556301 mirna_pc |
| 2816 hsa-mir-93 | CHAF1A   | 0.369414925 mirna_pc |
| 2817 hsa-mir-93 | DEPDC1B  | 0.329966809 mirna_pc |
| 2818 hsa-mir-93 | GINS4    | 0.345892472 mirna_pc |
| 2819 hsa-mir-93 | ANP32E   | 0.367341712 mirna_pc |
| 2820 hsa-mir-93 | CENPO    | 0.57370471 mirna_pc  |
| 2821 hsa-mir-93 | XRCC2    | 0.44037766 mirna_pc  |
| 2822 hsa-mir-93 | BRCA2    | 0.323935699 mirna_pc |
| 2823 hsa-mir-93 | CENPL    | 0.37255429 mirna_pc  |
| 2824 hsa-mir-93 | GEN1     | 0.456177186 mirna_pc |
| 2825 hsa-mir-93 | HMGB2    | 0.572816157 mirna_pc |
| 2826 hsa-mir-93 | GINS2    | 0.374175777 mirna_pc |
| 2827 hsa-mir-93 | DNA2     | 0.460990334 mirna_pc |
| 2828 hsa-mir-93 | DSN1     | 0.304767371 mirna_pc |
| 2829 hsa-mir-93 | SNHG1    | 0.335427783 mirna_pc |
| 2830 hsa-mir-93 | CSE1L    | 0.347085949 mirna_pc |
| 2831 hsa-mir-93 | E2F7     | 0.487365763 mirna_pc |
| 2832 hsa-mir-93 | PRMT1    | 0.361343517 mirna_pc |
| 2833 hsa-mir-93 | MLF1IP   | 0.445872463 mirna_pc |
| 2834 hsa-mir-93 | HEATR1   | 0.309076598 mirna_pc |
| 2835 hsa-mir-93 | C16orf75 | 0.367136365 mirna_pc |
| 2836 hsa-mir-93 | RBL1     | 0.361556388 mirna_pc |
| 2837 hsa-mir-93 | CAD      | 0.414622181 mirna_pc |
| 2838 hsa-mir-93 | CCDC99   | 0.310208601 mirna_pc |
| 2839 hsa-mir-93 | CDK2     | 0.439365952 mirna_pc |
| 2840 hsa-mir-93 | CDK4     | 0.332843577 mirna_pc |
| 2841 hsa-mir-93 | TMEM108  | 0.499798259 mirna_pc |
| 2842 hsa-mir-93 | CKAP5    | 0.313246364 mirna_pc |
| 2843 hsa-mir-93 | CHTF18   | 0.379233214 mirna_pc |
| 2844 hsa-mir-93 | HNRNPR   | 0.450830267 mirna_pc |
| 2845 hsa-mir-93 | DLEU2    | 0.32946392 mirna_pc  |
| 2846 hsa-mir-93 | PRIM1    | 0.388739518 mirna_pc |
| 2847 hsa-mir-93 | CENPH    | 0.406098629 mirna_pc |
| 2848 hsa-mir-93 | CHAF1B   | 0.327120637 mirna_pc |
| 2849 hsa-mir-93 | DHX34    | 0.368122927 mirna_pc |
| 2850 hsa-mir-93 | NCAPG2   | 0.321276009 mirna_pc |
| 2851 hsa-mir-93 | MSH2     | 0.53832294 mirna_pc  |
| 2852 hsa-mir-93 | DBF4     | 0.375138657 mirna_pc |
| 2853 hsa-mir-93 | SF3B3    | 0.447415332 mirna_pc |
| 2854 hsa-mir-93 | CDC7     | 0.477884348 mirna_pc |
| 2855 hsa-mir-93 | INTS7    | 0.301553018 mirna_pc |
| 2856 hsa-mir-93 | SSB      | 0.364464804 mirna_pc |
| 2857 hsa-mir-93 | RFC4     | 0.409493004 mirna_pc |
| 2858 hsa-mir-93 | FBX05    | 0.541716174 mirna_pc |
| 2859 hsa-mir-93 | DCLRE1B  | 0.324018172 mirna_pc |
| 2860 hsa-mir-93 | FIGNL1   | 0.396983235 mirna_pc |
| 2861 hsa-mir-93 | E2F3     | 0.406515275 mirna_pc |

|                 |              |                      |
|-----------------|--------------|----------------------|
| 2862 hsa-mir-93 | DDX11        | 0.469986791 mirna_pc |
| 2863 hsa-mir-93 | CDC25A       | 0.484672455 mirna_pc |
| 2864 hsa-mir-93 | TOPBP1       | 0.350967103 mirna_pc |
| 2865 hsa-mir-93 | TMEM48       | 0.307547958 mirna_pc |
| 2866 hsa-mir-93 | RAD54B       | 0.410539217 mirna_pc |
| 2867 hsa-mir-93 | OTX1         | 0.313989631 mirna_pc |
| 2868 hsa-mir-93 | PRKDC        | 0.343906477 mirna_pc |
| 2869 hsa-mir-93 | H2AFZ        | 0.377710074 mirna_pc |
| 2870 hsa-mir-93 | DDX12        | 0.597157465 mirna_pc |
| 2871 hsa-mir-93 | SMC2         | 0.322748254 mirna_pc |
| 2872 hsa-mir-93 | MCM8         | 0.470356918 mirna_pc |
| 2873 hsa-mir-93 | CPSF3        | 0.3654121 mirna_pc   |
| 2874 hsa-mir-93 | SNRPE        | 0.301728541 mirna_pc |
| 2875 hsa-mir-93 | C21orf45     | 0.348763133 mirna_pc |
| 2876 hsa-mir-93 | TFAP4        | 0.390107935 mirna_pc |
| 2877 hsa-mir-93 | PUS7         | 0.47669139 mirna_pc  |
| 2878 hsa-mir-93 | DAZAP1       | 0.317757312 mirna_pc |
| 2879 hsa-mir-93 | CBX8         | 0.308753593 mirna_pc |
| 2880 hsa-mir-93 | MASTL        | 0.346259703 mirna_pc |
| 2881 hsa-mir-93 | TMEM201      | 0.390302054 mirna_pc |
| 2882 hsa-mir-93 | NCL          | 0.38119805 mirna_pc  |
| 2883 hsa-mir-93 | SRRT         | 0.672372509 mirna_pc |
| 2884 hsa-mir-93 | CACYBP       | 0.370014236 mirna_pc |
| 2885 hsa-mir-93 | SASS6        | 0.416495685 mirna_pc |
| 2886 hsa-mir-93 | PSRC1        | 0.532077881 mirna_pc |
| 2887 hsa-mir-93 | C12orf32     | 0.352080689 mirna_pc |
| 2888 hsa-mir-93 | DBF4B        | 0.33950185 mirna_pc  |
| 2889 hsa-mir-93 | POU2F1       | 0.314982163 mirna_pc |
| 2890 hsa-mir-93 | FBL          | 0.309111128 mirna_pc |
| 2891 hsa-mir-93 | HIST1H1E     | 0.354826928 mirna_pc |
| 2892 hsa-mir-93 | HNRNPM       | 0.401473701 mirna_pc |
| 2893 hsa-mir-93 | TMPO         | 0.501910926 mirna_pc |
| 2894 hsa-mir-93 | SSBP3        | 0.323356813 mirna_pc |
| 2895 hsa-mir-93 | C20orf72     | 0.350477283 mirna_pc |
| 2896 hsa-mir-93 | SMPD4        | 0.42614103 mirna_pc  |
| 2897 hsa-mir-93 | GPR19        | 0.485691343 mirna_pc |
| 2898 hsa-mir-93 | GABPB1       | 0.514238148 mirna_pc |
| 2899 hsa-mir-93 | PPAT         | 0.399098906 mirna_pc |
| 2900 hsa-mir-93 | DHX9         | 0.500587262 mirna_pc |
| 2901 hsa-mir-93 | CCDC138      | 0.585670188 mirna_pc |
| 2902 hsa-mir-93 | LOC100128191 | 0.417233812 mirna_pc |
| 2903 hsa-mir-93 | HMG2         | 0.396352229 mirna_pc |
| 2904 hsa-mir-93 | ETV4         | 0.373398638 mirna_pc |
| 2905 hsa-mir-93 | POLA2        | 0.346324049 mirna_pc |
| 2906 hsa-mir-93 | CCDC77       | 0.365296119 mirna_pc |
| 2907 hsa-mir-93 | PHF6         | 0.339925236 mirna_pc |
| 2908 hsa-mir-93 | SFRS1        | 0.522009623 mirna_pc |
| 2909 hsa-mir-93 | WDR43        | 0.315711212 mirna_pc |
| 2910 hsa-mir-93 | SKP2         | 0.354131236 mirna_pc |
| 2911 hsa-mir-93 | SMARCD1      | 0.338811485 mirna_pc |
| 2912 hsa-mir-93 | ATXN2L       | 0.33774495 mirna_pc  |
| 2913 hsa-mir-93 | C4orf46      | 0.58357257 mirna_pc  |
| 2914 hsa-mir-93 | C1orf107     | 0.316994947 mirna_pc |
| 2915 hsa-mir-93 | GPN1         | 0.310258284 mirna_pc |

|                 |          |                      |
|-----------------|----------|----------------------|
| 2916 hsa-mir-93 | RFC5     | 0.423252532 mirna_pc |
| 2917 hsa-mir-93 | HSPD1    | 0.421377259 mirna_pc |
| 2918 hsa-mir-93 | MAZ      | 0.382500797 mirna_pc |
| 2919 hsa-mir-93 | SSRP1    | 0.341244195 mirna_pc |
| 2920 hsa-mir-93 | POLR2D   | 0.470389495 mirna_pc |
| 2921 hsa-mir-93 | KHDRBS1  | 0.477657829 mirna_pc |
| 2922 hsa-mir-93 | TUB      | 0.312592016 mirna_pc |
| 2923 hsa-mir-93 | SPAST    | 0.365579426 mirna_pc |
| 2924 hsa-mir-93 | CCDC21   | 0.332592279 mirna_pc |
| 2925 hsa-mir-93 | MTL 5.00 | 0.536537102 mirna_pc |
| 2926 hsa-mir-93 | PRPF40A  | 0.381512967 mirna_pc |
| 2927 hsa-mir-93 | CCDC18   | 0.415563746 mirna_pc |
| 2928 hsa-mir-93 | PARP1    | 0.422774946 mirna_pc |
| 2929 hsa-mir-93 | CCDC34   | 0.355590152 mirna_pc |
| 2930 hsa-mir-93 | DNAJC2   | 0.473335646 mirna_pc |
| 2931 hsa-mir-93 | C4orf21  | 0.501970621 mirna_pc |
| 2932 hsa-mir-93 | TMEM194A | 0.594218022 mirna_pc |
| 2933 hsa-mir-93 | AP1S1    | 0.357318671 mirna_pc |
| 2934 hsa-mir-93 | SLC39A10 | 0.495058777 mirna_pc |
| 2935 hsa-mir-93 | SUV420H2 | 0.359205115 mirna_pc |
| 2936 hsa-mir-93 | ZNF695   | 0.523262024 mirna_pc |
| 2937 hsa-mir-93 | NEDD1    | 0.435654953 mirna_pc |
| 2938 hsa-mir-93 | KIF24    | 0.301858276 mirna_pc |
| 2939 hsa-mir-93 | HAUS6    | 0.421386565 mirna_pc |
| 2940 hsa-mir-93 | CENPJ    | 0.353242821 mirna_pc |
| 2941 hsa-mir-93 | LIN9     | 0.359245706 mirna_pc |
| 2942 hsa-mir-93 | CEP135   | 0.44102911 mirna_pc  |
| 2943 hsa-mir-93 | HNRNPU   | 0.513720915 mirna_pc |
| 2944 hsa-mir-93 | PSMC2    | 0.425078009 mirna_pc |
| 2945 hsa-mir-93 | NASP     | 0.482079486 mirna_pc |
| 2946 hsa-mir-93 | ZNF280C  | 0.308878936 mirna_pc |
| 2947 hsa-mir-93 | POLR1B   | 0.373286017 mirna_pc |
| 2948 hsa-mir-93 | BCL2     | 0.450875487 mirna_pc |
| 2949 hsa-mir-93 | PTMA     | 0.369473855 mirna_pc |
| 2950 hsa-mir-93 | WDR76    | 0.36905195 mirna_pc  |
| 2951 hsa-mir-93 | HMGXB4   | 0.309207246 mirna_pc |
| 2952 hsa-mir-93 | C11orf84 | 0.375122605 mirna_pc |
| 2953 hsa-mir-93 | NCBP2    | 0.330411077 mirna_pc |
| 2954 hsa-mir-93 | SLC12A9  | 0.395970396 mirna_pc |
| 2955 hsa-mir-93 | SUV39H2  | 0.557695916 mirna_pc |
| 2956 hsa-mir-93 | GORAB    | 0.440150056 mirna_pc |
| 2957 hsa-mir-93 | R3HDM1   | 0.404663745 mirna_pc |
| 2958 hsa-mir-93 | FANCL    | 0.312363194 mirna_pc |
| 2959 hsa-mir-93 | RQCD1    | 0.355797913 mirna_pc |
| 2960 hsa-mir-93 | HNRNPD   | 0.513672009 mirna_pc |
| 2961 hsa-mir-93 | TARDBP   | 0.36185352 mirna_pc  |
| 2962 hsa-mir-93 | WDR19    | 0.33086237 mirna_pc  |
| 2963 hsa-mir-93 | POP1     | 0.303846661 mirna_pc |
| 2964 hsa-mir-93 | SFRS3    | 0.379360193 mirna_pc |
| 2965 hsa-mir-93 | NUP160   | 0.361370756 mirna_pc |
| 2966 hsa-mir-93 | SHOX2    | 0.420916545 mirna_pc |
| 2967 hsa-mir-93 | CCT4     | 0.335985383 mirna_pc |
| 2968 hsa-mir-93 | RAD9A    | 0.329560537 mirna_pc |
| 2969 hsa-mir-93 | ELAVL1   | 0.343730818 mirna_pc |

|                 |          |                      |
|-----------------|----------|----------------------|
| 2970 hsa-mir-93 | CCDC121  | 0.302827242 mirna_pc |
| 2971 hsa-mir-93 | ABCE1    | 0.334876363 mirna_pc |
| 2972 hsa-mir-93 | KIAA0406 | 0.336714535 mirna_pc |
| 2973 hsa-mir-93 | PSMC3IP  | 0.354193794 mirna_pc |
| 2974 hsa-mir-93 | PAK1IP1  | 0.302856016 mirna_pc |
| 2975 hsa-mir-93 | ATP13A3  | 0.335175119 mirna_pc |
| 2976 hsa-mir-93 | PMAIP1   | 0.374402082 mirna_pc |
| 2977 hsa-mir-93 | POP7     | 0.417979918 mirna_pc |
| 2978 hsa-mir-93 | DHFR     | 0.445109154 mirna_pc |
| 2979 hsa-mir-93 | NAA25    | 0.362600706 mirna_pc |
| 2980 hsa-mir-93 | ILF3     | 0.473525141 mirna_pc |
| 2981 hsa-mir-93 | TAF6     | 0.451875821 mirna_pc |
| 2982 hsa-mir-93 | Clorf96  | 0.419229627 mirna_pc |
| 2983 hsa-mir-93 | EHMT2    | 0.39973554 mirna_pc  |
| 2984 hsa-mir-93 | MAGOHB   | 0.380017547 mirna_pc |
| 2985 hsa-mir-93 | C18orf54 | 0.326963004 mirna_pc |
| 2986 hsa-mir-93 | UBAP2L   | 0.39717074 mirna_pc  |
| 2987 hsa-mir-93 | DEK      | 0.447847568 mirna_pc |
| 2988 hsa-mir-93 | TBC1D4   | 0.322664201 mirna_pc |
| 2989 hsa-mir-93 | PLOD3    | 0.341816954 mirna_pc |
| 2990 hsa-mir-93 | PASK     | 0.442595011 mirna_pc |
| 2991 hsa-mir-93 | USP42    | 0.300241209 mirna_pc |
| 2992 hsa-mir-93 | RPGRIP1L | 0.392999586 mirna_pc |
| 2993 hsa-mir-93 | TAF4     | 0.302512636 mirna_pc |
| 2994 hsa-mir-93 | ZBTB33   | 0.308387604 mirna_pc |
| 2995 hsa-mir-93 | TGS1     | 0.377499632 mirna_pc |
| 2996 hsa-mir-93 | LRWD1    | 0.409576183 mirna_pc |
| 2997 hsa-mir-93 | HEATR2   | 0.434488236 mirna_pc |
| 2998 hsa-mir-93 | LSM 6.00 | 0.426093111 mirna_pc |
| 2999 hsa-mir-93 | PRAME    | 0.368794129 mirna_pc |
| 3000 hsa-mir-93 | FBXW8    | 0.307208941 mirna_pc |
| 3001 hsa-mir-93 | FUBP1    | 0.462118544 mirna_pc |
| 3002 hsa-mir-93 | IPO9     | 0.458468315 mirna_pc |
| 3003 hsa-mir-93 | SART3    | 0.435076538 mirna_pc |
| 3004 hsa-mir-93 | HNRNPK   | 0.325532939 mirna_pc |
| 3005 hsa-mir-93 | SR140    | 0.330859054 mirna_pc |
| 3006 hsa-mir-93 | TRA2B    | 0.492568334 mirna_pc |
| 3007 hsa-mir-93 | RSRC1    | 0.373344422 mirna_pc |
| 3008 hsa-mir-93 | TRAF4    | 0.344849445 mirna_pc |
| 3009 hsa-mir-93 | GAR1     | 0.426157053 mirna_pc |
| 3010 hsa-mir-93 | CEP152   | 0.400031075 mirna_pc |
| 3011 hsa-mir-93 | C7orf47  | 0.33789923 mirna_pc  |
| 3012 hsa-mir-93 | C15orf23 | 0.379118627 mirna_pc |
| 3013 hsa-mir-93 | CDRT4    | 0.44978397 mirna_pc  |
| 3014 hsa-mir-93 | RBM12B   | 0.362648365 mirna_pc |
| 3015 hsa-mir-93 | C3orf21  | 0.355023463 mirna_pc |
| 3016 hsa-mir-93 | LSM14B   | 0.323294811 mirna_pc |
| 3017 hsa-mir-93 | CPXM1    | 0.325910358 mirna_pc |
| 3018 hsa-mir-93 | PMS2L1   | 0.325615199 mirna_pc |
| 3019 hsa-mir-93 | IGF2BP2  | 0.330328104 mirna_pc |
| 3020 hsa-mir-93 | WHSC1    | 0.459105317 mirna_pc |
| 3021 hsa-mir-93 | ITGB3BP  | 0.435840095 mirna_pc |
| 3022 hsa-mir-93 | BCL2A1   | 0.32441821 mirna_pc  |
| 3023 hsa-mir-93 | ENOPH1   | 0.317609078 mirna_pc |

|                 |           |                      |
|-----------------|-----------|----------------------|
| 3024 hsa-mir-93 | NFIB      | 0.311304548 mirna_pc |
| 3025 hsa-mir-93 | C4orf43   | 0.426431939 mirna_pc |
| 3026 hsa-mir-93 | ING5      | 0.310962182 mirna_pc |
| 3027 hsa-mir-93 | HSPA14    | 0.310542757 mirna_pc |
| 3028 hsa-mir-93 | CEP78     | 0.374335097 mirna_pc |
| 3029 hsa-mir-93 | PLEKHG4   | 0.321134503 mirna_pc |
| 3030 hsa-mir-93 | SFPQ      | 0.462330245 mirna_pc |
| 3031 hsa-mir-93 | CNOT3     | 0.303394107 mirna_pc |
| 3032 hsa-mir-93 | CD83      | 0.490993767 mirna_pc |
| 3033 hsa-mir-93 | FAM125B   | 0.342527859 mirna_pc |
| 3034 hsa-mir-93 | MPHOSPH9  | 0.368187198 mirna_pc |
| 3035 hsa-mir-93 | CADM1     | 0.432190125 mirna_pc |
| 3036 hsa-mir-93 | POLA1     | 0.391757562 mirna_pc |
| 3037 hsa-mir-93 | HDAC2     | 0.364533656 mirna_pc |
| 3038 hsa-mir-93 | GMNN      | 0.35967603 mirna_pc  |
| 3039 hsa-mir-93 | C10orf119 | 0.383767649 mirna_pc |
| 3040 hsa-mir-93 | ANKRD32   | 0.387744129 mirna_pc |
| 3041 hsa-mir-93 | C10orf2   | 0.31874984 mirna_pc  |
| 3042 hsa-mir-93 | POGK      | 0.33411282 mirna_pc  |
| 3043 hsa-mir-93 | CPAMD8    | 0.399942455 mirna_pc |
| 3044 hsa-mir-93 | SALL2     | 0.300352925 mirna_pc |
| 3045 hsa-mir-93 | FAM86C    | 0.357395025 mirna_pc |
| 3046 hsa-mir-93 | DUS4L     | 0.366580626 mirna_pc |
| 3047 hsa-mir-93 | PTCD1     | 0.321504616 mirna_pc |
| 3048 hsa-mir-93 | ZNF107    | 0.303134413 mirna_pc |
| 3049 hsa-mir-93 | MSH6      | 0.513307846 mirna_pc |
| 3050 hsa-mir-93 | XRN2      | 0.341856799 mirna_pc |
| 3051 hsa-mir-93 | TP73      | 0.33515297 mirna_pc  |
| 3052 hsa-mir-93 | KPNB1     | 0.35248888 mirna_pc  |
| 3053 hsa-mir-93 | LEF1      | 0.470182286 mirna_pc |
| 3054 hsa-mir-93 | CASP3     | 0.310154564 mirna_pc |
| 3055 hsa-mir-93 | SMC3      | 0.462164722 mirna_pc |
| 3056 hsa-mir-93 | FLVCR1    | 0.346677562 mirna_pc |
| 3057 hsa-mir-93 | HNRNPA1   | 0.349603761 mirna_pc |
| 3058 hsa-mir-93 | KREMEN2   | 0.548782807 mirna_pc |
| 3059 hsa-mir-93 | TRIP6     | 0.395190702 mirna_pc |
| 3060 hsa-mir-93 | TMEM194B  | 0.306300191 mirna_pc |
| 3061 hsa-mir-93 | MEX3A     | 0.716093916 mirna_pc |
| 3062 hsa-mir-93 | MOGS      | 0.321098865 mirna_pc |
| 3063 hsa-mir-93 | CEP250    | 0.307861336 mirna_pc |
| 3064 hsa-mir-93 | BAT1      | 0.330408307 mirna_pc |
| 3065 hsa-mir-93 | COIL      | 0.307119539 mirna_pc |
| 3066 hsa-mir-93 | NGFR      | 0.313551079 mirna_pc |
| 3067 hsa-mir-93 | PDCD11    | 0.390775979 mirna_pc |
| 3068 hsa-mir-93 | IRAK1BP1  | 0.380931008 mirna_pc |
| 3069 hsa-mir-93 | TAF5      | 0.413072258 mirna_pc |
| 3070 hsa-mir-93 | FANCC     | 0.386687115 mirna_pc |
| 3071 hsa-mir-93 | LRRN1     | 0.324268802 mirna_pc |
| 3072 hsa-mir-93 | TIFA      | 0.41079053 mirna_pc  |
| 3073 hsa-mir-93 | CCDC28B   | 0.377898696 mirna_pc |
| 3074 hsa-mir-93 | UNC119B   | 0.325575328 mirna_pc |
| 3075 hsa-mir-93 | SUZ12     | 0.337889139 mirna_pc |
| 3076 hsa-mir-93 | HNRNPA1L2 | 0.372501535 mirna_pc |
| 3077 hsa-mir-93 | NAA15     | 0.361810934 mirna_pc |

|                 |           |                      |
|-----------------|-----------|----------------------|
| 3078 hsa-mir-93 | PPFIA1    | 0.3415623 mirna_pc   |
| 3079 hsa-mir-93 | BARD1     | 0.315216166 mirna_pc |
| 3080 hsa-mir-93 | CBX1      | 0.32692257 mirna_pc  |
| 3081 hsa-mir-93 | EMILIN3   | 0.397630052 mirna_pc |
| 3082 hsa-mir-93 | ZBTB12    | 0.488002402 mirna_pc |
| 3083 hsa-mir-93 | TADA1     | 0.344401457 mirna_pc |
| 3084 hsa-mir-93 | MCTP2     | 0.527729946 mirna_pc |
| 3085 hsa-mir-93 | USP1      | 0.354631871 mirna_pc |
| 3086 hsa-mir-93 | TMEM68    | 0.313745765 mirna_pc |
| 3087 hsa-mir-93 | LOC642846 | 0.580687117 mirna_pc |
| 3088 hsa-mir-93 | TGIF2     | 0.574754993 mirna_pc |
| 3089 hsa-mir-93 | CHERP     | 0.320140811 mirna_pc |
| 3090 hsa-mir-93 | SENP1     | 0.40791923 mirna_pc  |
| 3091 hsa-mir-93 | RCN2      | 0.413519287 mirna_pc |
| 3092 hsa-mir-93 | MTF2      | 0.41272855 mirna_pc  |
| 3093 hsa-mir-93 | CCDC142   | 0.323111847 mirna_pc |
| 3094 hsa-mir-93 | POU6F2    | 0.392428812 mirna_pc |
| 3095 hsa-mir-93 | ETV6      | 0.354784358 mirna_pc |
| 3096 hsa-mir-93 | NOL10     | 0.345491415 mirna_pc |
| 3097 hsa-mir-93 | ANAPC1    | 0.312082391 mirna_pc |
| 3098 hsa-mir-93 | PXDN      | 0.3275029 mirna_pc   |
| 3099 hsa-mir-93 | DDX47     | 0.395759923 mirna_pc |
| 3100 hsa-mir-93 | POLE      | 0.565233945 mirna_pc |
| 3101 hsa-mir-93 | ZKSCAN2   | 0.30458201 mirna_pc  |
| 3102 hsa-mir-93 | CHML      | 0.323613652 mirna_pc |
| 3103 hsa-mir-93 | CTDSPL2   | 0.388248504 mirna_pc |
| 3104 hsa-mir-93 | ERF       | 0.305726178 mirna_pc |
| 3105 hsa-mir-93 | TAF1B     | 0.310796966 mirna_pc |
| 3106 hsa-mir-93 | PPP3R1    | 0.377358303 mirna_pc |
| 3107 hsa-mir-93 | RBM14     | 0.404070465 mirna_pc |
| 3108 hsa-mir-93 | EXOSC9    | 0.406386065 mirna_pc |
| 3109 hsa-mir-93 | UNG       | 0.317962243 mirna_pc |
| 3110 hsa-mir-93 | RBMX      | 0.501595437 mirna_pc |
| 3111 hsa-mir-93 | ORC5L     | 0.489942683 mirna_pc |
| 3112 hsa-mir-93 | TSEN15    | 0.306464724 mirna_pc |
| 3113 hsa-mir-93 | CCDC41    | 0.310102049 mirna_pc |
| 3114 hsa-mir-93 | NOC3L     | 0.360050931 mirna_pc |
| 3115 hsa-mir-93 | MDC 1.00  | 0.442590082 mirna_pc |
| 3116 hsa-mir-93 | XRCC5     | 0.305976765 mirna_pc |
| 3117 hsa-mir-93 | CTCF      | 0.380530875 mirna_pc |
| 3118 hsa-mir-93 | RPL39L    | 0.40796307 mirna_pc  |
| 3119 hsa-mir-93 | ASB3      | 0.34396817 mirna_pc  |
| 3120 hsa-mir-93 | EPHB4     | 0.609792406 mirna_pc |
| 3121 hsa-mir-93 | IGSF9     | 0.544733063 mirna_pc |
| 3122 hsa-mir-93 | LBR       | 0.36115082 mirna_pc  |
| 3123 hsa-mir-93 | UBXN2A    | 0.302847058 mirna_pc |
| 3124 hsa-mir-93 | GPATCH2   | 0.327837749 mirna_pc |
| 3125 hsa-mir-93 | DNAJC14   | 0.326753878 mirna_pc |
| 3126 hsa-mir-93 | FIP1L1    | 0.35705211 mirna_pc  |
| 3127 hsa-mir-93 | ZNF519    | 0.373356327 mirna_pc |
| 3128 hsa-mir-93 | GTF3C3    | 0.360687702 mirna_pc |
| 3129 hsa-mir-93 | CIT       | 0.427991669 mirna_pc |
| 3130 hsa-mir-93 | ZRANB3    | 0.428266247 mirna_pc |
| 3131 hsa-mir-93 | RIF1      | 0.422406621 mirna_pc |

|                 |           |                      |
|-----------------|-----------|----------------------|
| 3132 hsa-mir-93 | KDM2B     | 0.401520246 mirna_pc |
| 3133 hsa-mir-93 | STAG2     | 0.301839658 mirna_pc |
| 3134 hsa-mir-93 | NUDT21    | 0.321276641 mirna_pc |
| 3135 hsa-mir-93 | SCLT1     | 0.419199304 mirna_pc |
| 3136 hsa-mir-93 | FAM185A   | 0.339099391 mirna_pc |
| 3137 hsa-mir-93 | UFSP1     | 0.323201629 mirna_pc |
| 3138 hsa-mir-93 | SUZ12P    | 0.301786404 mirna_pc |
| 3139 hsa-mir-93 | FRMD4A    | 0.399826571 mirna_pc |
| 3140 hsa-mir-93 | MYB       | 0.473155176 mirna_pc |
| 3141 hsa-mir-93 | ZNF639    | 0.304728225 mirna_pc |
| 3142 hsa-mir-93 | ITPRIPL1  | 0.46582213 mirna_pc  |
| 3143 hsa-mir-93 | TTLL4     | 0.473781352 mirna_pc |
| 3144 hsa-mir-93 | THADA     | 0.34995448 mirna_pc  |
| 3145 hsa-mir-93 | C20orf177 | 0.367711388 mirna_pc |
| 3146 hsa-mir-93 | ATXN7L2   | 0.331739957 mirna_pc |
| 3147 hsa-mir-93 | ACBD7     | 0.31147219 mirna_pc  |
| 3148 hsa-mir-93 | RFC1      | 0.340216947 mirna_pc |
| 3149 hsa-mir-93 | ATN1      | 0.394158478 mirna_pc |
| 3150 hsa-mir-93 | ANKRD6    | 0.423290994 mirna_pc |
| 3151 hsa-mir-93 | NUP133    | 0.373286172 mirna_pc |
| 3152 hsa-mir-93 | BCL7A     | 0.41656788 mirna_pc  |
| 3153 hsa-mir-93 | WNT10A    | 0.309134693 mirna_pc |
| 3154 hsa-mir-93 | C7orf44   | 0.300404014 mirna_pc |
| 3155 hsa-mir-93 | TRPA1     | 0.49565985 mirna_pc  |
| 3156 hsa-mir-93 | URB2      | 0.330514977 mirna_pc |
| 3157 hsa-mir-93 | PALM2     | 0.302819737 mirna_pc |
| 3158 hsa-mir-93 | ARNT2     | 0.365919823 mirna_pc |
| 3159 hsa-mir-93 | ARHGAP19  | 0.425999034 mirna_pc |
| 3160 hsa-mir-93 | ZNF286A   | 0.592590826 mirna_pc |
| 3161 hsa-mir-93 | PRPF38A   | 0.358183046 mirna_pc |
| 3162 hsa-mir-93 | KIAA0922  | 0.306493977 mirna_pc |
| 3163 hsa-mir-93 | WDR77     | 0.31164173 mirna_pc  |
| 3164 hsa-mir-93 | SPDYE3    | 0.341360601 mirna_pc |
| 3165 hsa-mir-93 | MRPL21    | 0.50722063 mirna_pc  |
| 3166 hsa-mir-93 | WBP11     | 0.319095499 mirna_pc |
| 3167 hsa-mir-93 | DMRTA2    | 0.340455312 mirna_pc |
| 3168 hsa-mir-93 | RFX7      | 0.314806509 mirna_pc |
| 3169 hsa-mir-93 | ILKAP     | 0.338436428 mirna_pc |
| 3170 hsa-mir-93 | PRR3      | 0.346515044 mirna_pc |
| 3171 hsa-mir-93 | SPATA5    | 0.336894196 mirna_pc |
| 3172 hsa-mir-93 | CNTROB    | 0.330052741 mirna_pc |
| 3173 hsa-mir-93 | TRRAP     | 0.543008159 mirna_pc |
| 3174 hsa-mir-93 | UBFD1     | 0.357531113 mirna_pc |
| 3175 hsa-mir-93 | ORAI2     | 0.435979571 mirna_pc |
| 3176 hsa-mir-93 | SEMA4F    | 0.406743774 mirna_pc |
| 3177 hsa-mir-93 | RBM12     | 0.353555329 mirna_pc |
| 3178 hsa-mir-93 | SLC25A13  | 0.422464595 mirna_pc |
| 3179 hsa-mir-93 | ZNF286B   | 0.380361196 mirna_pc |
| 3180 hsa-mir-93 | DDX20     | 0.46447081 mirna_pc  |
| 3181 hsa-mir-93 | SAFB      | 0.313405976 mirna_pc |
| 3182 hsa-mir-93 | SAP130    | 0.3641588 mirna_pc   |
| 3183 hsa-mir-93 | BAZ1B     | 0.365688658 mirna_pc |
| 3184 hsa-mir-93 | INPPL1    | 0.380808323 mirna_pc |
| 3185 hsa-mir-93 | TCERG1    | 0.351304213 mirna_pc |

|                 |           |                      |
|-----------------|-----------|----------------------|
| 3186 hsa-mir-93 | SEC61A2   | 0.401357623 mirna_pc |
| 3187 hsa-mir-93 | PSPC1     | 0.331824797 mirna_pc |
| 3188 hsa-mir-93 | ATP6V1E2  | 0.36293818 mirna_pc  |
| 3189 hsa-mir-93 | LMLN      | 0.313384054 mirna_pc |
| 3190 hsa-mir-93 | MAPKAPK5  | 0.321735665 mirna_pc |
| 3191 hsa-mir-93 | RBMXL1    | 0.308282388 mirna_pc |
| 3192 hsa-mir-93 | GMCL1     | 0.320865223 mirna_pc |
| 3193 hsa-mir-93 | GPR3      | 0.453979615 mirna_pc |
| 3194 hsa-mir-93 | E2F6      | 0.422255873 mirna_pc |
| 3195 hsa-mir-93 | SSX2IP    | 0.354636207 mirna_pc |
| 3196 hsa-mir-93 | CPSF4     | 0.301741445 mirna_pc |
| 3197 hsa-mir-93 | HUNK      | 0.351237517 mirna_pc |
| 3198 hsa-mir-93 | PILRB     | 0.417865361 mirna_pc |
| 3199 hsa-mir-93 | SFRS13A   | 0.430534276 mirna_pc |
| 3200 hsa-mir-93 | SNRNP200  | 0.33834127 mirna_pc  |
| 3201 hsa-mir-93 | LOC646851 | 0.329892492 mirna_pc |
| 3202 hsa-mir-93 | SCLY      | 0.634061947 mirna_pc |
| 3203 hsa-mir-93 | GPR125    | 0.423455336 mirna_pc |
| 3204 hsa-mir-93 | NUP35     | 0.307594417 mirna_pc |
| 3205 hsa-mir-93 | ALG10     | 0.373175281 mirna_pc |
| 3206 hsa-mir-93 | TFAM      | 0.346381169 mirna_pc |
| 3207 hsa-mir-93 | LDLRAD3   | 0.511498957 mirna_pc |
| 3208 hsa-mir-93 | TTC27     | 0.3082118 mirna_pc   |
| 3209 hsa-mir-93 | COPS6     | 0.353333573 mirna_pc |
| 3210 hsa-mir-93 | GSTCD     | 0.406461143 mirna_pc |
| 3211 hsa-mir-93 | DHRS13    | 0.415490942 mirna_pc |
| 3212 hsa-mir-93 | ORC4L     | 0.370550815 mirna_pc |
| 3213 hsa-mir-93 | RTTN      | 0.392602172 mirna_pc |
| 3214 hsa-mir-93 | HNRNPA3   | 0.321565186 mirna_pc |
| 3215 hsa-mir-93 | EWSR1     | 0.310428274 mirna_pc |
| 3216 hsa-mir-93 | SMC1A     | 0.306929582 mirna_pc |
| 3217 hsa-mir-93 | DHX57     | 0.474909805 mirna_pc |
| 3218 hsa-mir-93 | NUMA1     | 0.37769429 mirna_pc  |
| 3219 hsa-mir-93 | ALX3      | 0.517016624 mirna_pc |
| 3220 hsa-mir-93 | CHST14    | 0.301171413 mirna_pc |
| 3221 hsa-mir-93 | ACVR2B    | 0.40080901 mirna_pc  |
| 3222 hsa-mir-93 | SFT2D3    | 0.407050572 mirna_pc |
| 3223 hsa-mir-93 | LIG3      | 0.326579087 mirna_pc |
| 3224 hsa-mir-93 | DPY19L2P2 | 0.353178518 mirna_pc |
| 3225 hsa-mir-93 | CABLES2   | 0.321656602 mirna_pc |
| 3226 hsa-mir-93 | WDR35     | 0.304687617 mirna_pc |
| 3227 hsa-mir-93 | MRPL30    | 0.326375158 mirna_pc |
| 3228 hsa-mir-93 | SFRS7     | 0.394854791 mirna_pc |
| 3229 hsa-mir-93 | ALKBH4    | 0.46632677 mirna_pc  |
| 3230 hsa-mir-93 | MRPL42    | 0.369565594 mirna_pc |
| 3231 hsa-mir-93 | BEND3     | 0.336544236 mirna_pc |
| 3232 hsa-mir-93 | CBFA2T2   | 0.327888997 mirna_pc |
| 3233 hsa-mir-93 | LZTS1     | 0.313860189 mirna_pc |
| 3234 hsa-mir-93 | ATXN7L1   | 0.307068197 mirna_pc |
| 3235 hsa-mir-93 | NFXL1     | 0.313768112 mirna_pc |
| 3236 hsa-mir-93 | PFAS      | 0.391042972 mirna_pc |
| 3237 hsa-mir-93 | LRTOMT    | 0.386467302 mirna_pc |
| 3238 hsa-mir-93 | ARMC10    | 0.464774316 mirna_pc |
| 3239 hsa-mir-93 | GXYLT2    | 0.306860742 mirna_pc |



|                 |          |                      |
|-----------------|----------|----------------------|
| 3240 hsa-mir-93 | RPL13P5  | 0.304341739 mirna_pc |
| 3241 hsa-mir-93 | BAT2     | 0.339526832 mirna_pc |
| 3242 hsa-mir-93 | ERCC3    | 0.326075697 mirna_pc |
| 3243 hsa-mir-93 | EDAR     | 0.442633885 mirna_pc |
| 3244 hsa-mir-93 | IFT81    | 0.429799531 mirna_pc |
| 3245 hsa-mir-93 | ORAOV1   | 0.311946717 mirna_pc |
| 3246 hsa-mir-93 | HNRNPH1  | 0.312660648 mirna_pc |
| 3247 hsa-mir-93 | ZNF184   | 0.374198589 mirna_pc |
| 3248 hsa-mir-93 | NUP153   | 0.420747421 mirna_pc |
| 3249 hsa-mir-93 | NIPSNAP1 | 0.303707171 mirna_pc |
| 3250 hsa-mir-93 | WEE1     | 0.314621822 mirna_pc |
| 3251 hsa-mir-93 | C2orf68  | 0.307572418 mirna_pc |
| 3252 hsa-mir-93 | ARHGEF19 | 0.383539266 mirna_pc |
| 3253 hsa-mir-93 | C17orf75 | 0.329577052 mirna_pc |
| 3254 hsa-mir-93 | THAP5    | 0.432021447 mirna_pc |
| 3255 hsa-mir-93 | WDR92    | 0.317576907 mirna_pc |
| 3256 hsa-mir-93 | CCND1    | 0.316729157 mirna_pc |
| 3257 hsa-mir-93 | MCM3APAS | 0.411798561 mirna_pc |
| 3258 hsa-mir-93 | NFATC3   | 0.320011852 mirna_pc |
| 3259 hsa-mir-93 | HCFC1    | 0.343119878 mirna_pc |
| 3260 hsa-mir-93 | ZNF771   | 0.336549599 mirna_pc |
| 3261 hsa-mir-93 | GTF3C4   | 0.333880789 mirna_pc |
| 3262 hsa-mir-93 | CASP8AP2 | 0.306379139 mirna_pc |
| 3263 hsa-mir-93 | TCTN2    | 0.50111511 mirna_pc  |
| 3264 hsa-mir-93 | BCAN     | 0.48020383 mirna_pc  |
| 3265 hsa-mir-93 | DHX15    | 0.374712632 mirna_pc |
| 3266 hsa-mir-93 | ZKSCAN5  | 0.318143513 mirna_pc |
| 3267 hsa-mir-93 | ZNF669   | 0.319906341 mirna_pc |
| 3268 hsa-mir-93 | TOP3A    | 0.339192464 mirna_pc |
| 3269 hsa-mir-93 | LRP6     | 0.38427217 mirna_pc  |
| 3270 hsa-mir-93 | EXTL2    | 0.359968917 mirna_pc |
| 3271 hsa-mir-93 | DCP2     | 0.385559923 mirna_pc |
| 3272 hsa-mir-93 | ZNF92    | 0.342692448 mirna_pc |
| 3273 hsa-mir-93 | PRKD3    | 0.409607275 mirna_pc |
| 3274 hsa-mir-93 | C2orf44  | 0.431085016 mirna_pc |
| 3275 hsa-mir-93 | SEPHS1   | 0.507700734 mirna_pc |
| 3276 hsa-mir-93 | SHISA2   | 0.48925644 mirna_pc  |
| 3277 hsa-mir-93 | CBX5     | 0.473477857 mirna_pc |
| 3278 hsa-mir-93 | RMND1    | 0.319950728 mirna_pc |
| 3279 hsa-mir-93 | RYK      | 0.307149211 mirna_pc |
| 3280 hsa-mir-93 | ADNP     | 0.383480841 mirna_pc |
| 3281 hsa-mir-93 | IFT172   | 0.337365 mirna_pc    |
| 3282 hsa-mir-93 | TTC30B   | 0.366503641 mirna_pc |
| 3283 hsa-mir-93 | ATAD2B   | 0.305233664 mirna_pc |
| 3284 hsa-mir-93 | AGBL5    | 0.454623277 mirna_pc |
| 3285 hsa-mir-93 | VASH2    | 0.563568145 mirna_pc |
| 3286 hsa-mir-93 | PHB2     | 0.324947573 mirna_pc |
| 3287 hsa-mir-93 | MYL6B    | 0.386642816 mirna_pc |
| 3288 hsa-mir-93 | ZNF498   | 0.51362093 mirna_pc  |
| 3289 hsa-mir-93 | NRF1     | 0.305264167 mirna_pc |
| 3290 hsa-mir-93 | CD200    | 0.480993369 mirna_pc |
| 3291 hsa-mir-93 | RABL5    | 0.443946437 mirna_pc |
| 3292 hsa-mir-93 | MED28    | 0.366177413 mirna_pc |
| 3293 hsa-mir-93 | MATR3    | 0.331471648 mirna_pc |

|                 |          |                      |
|-----------------|----------|----------------------|
| 3294 hsa-mir-93 | HNRNPUL1 | 0.411279868 mirna_pc |
| 3295 hsa-mir-93 | ZNF384   | 0.394502229 mirna_pc |
| 3296 hsa-mir-93 | GPX7     | 0.312432212 mirna_pc |
| 3297 hsa-mir-93 | PAN2     | 0.3351055 mirna_pc   |
| 3298 hsa-mir-93 | NUP43    | 0.356250656 mirna_pc |
| 3299 hsa-mir-93 | BRD3     | 0.300970638 mirna_pc |
| 3300 hsa-mir-93 | RNF41    | 0.305872396 mirna_pc |
| 3301 hsa-mir-93 | CHST11   | 0.438544495 mirna_pc |
| 3302 hsa-mir-93 | BCL11A   | 0.507200108 mirna_pc |
| 3303 hsa-mir-93 | FBX017   | 0.325465707 mirna_pc |
| 3304 hsa-mir-93 | C4orf27  | 0.365845601 mirna_pc |
| 3305 hsa-mir-93 | ZNF512   | 0.321654026 mirna_pc |
| 3306 hsa-mir-93 | PMPCB    | 0.442317772 mirna_pc |
| 3307 hsa-mir-93 | ZNF473   | 0.411516775 mirna_pc |
| 3308 hsa-mir-93 | COPS7B   | 0.33576008 mirna_pc  |
| 3309 hsa-mir-93 | USP21    | 0.418357962 mirna_pc |
| 3310 hsa-mir-93 | ALMS1    | 0.46341515 mirna_pc  |
| 3311 hsa-mir-93 | PRR12    | 0.303481583 mirna_pc |
| 3312 hsa-mir-93 | PMS2L3   | 0.313183284 mirna_pc |
| 3313 hsa-mir-93 | SNRNP48  | 0.350570504 mirna_pc |
| 3314 hsa-mir-93 | DCLRE1A  | 0.360199261 mirna_pc |
| 3315 hsa-mir-93 | ANP32A   | 0.387227203 mirna_pc |
| 3316 hsa-mir-93 | RAD52    | 0.357465056 mirna_pc |
| 3317 hsa-mir-93 | E2F5     | 0.317246531 mirna_pc |
| 3318 hsa-mir-93 | RNF121   | 0.362033299 mirna_pc |
| 3319 hsa-mir-93 | CPT1A    | 0.339783087 mirna_pc |
| 3320 hsa-mir-93 | EMID1    | 0.334720305 mirna_pc |
| 3321 hsa-mir-93 | ZMYM4    | 0.318820743 mirna_pc |
| 3322 hsa-mir-93 | AP4M1    | 0.460778849 mirna_pc |
| 3323 hsa-mir-93 | PRKAR1B  | 0.32871987 mirna_pc  |
| 3324 hsa-mir-93 | LMAN2L   | 0.301735445 mirna_pc |
| 3325 hsa-mir-93 | RBM15    | 0.317781984 mirna_pc |
| 3326 hsa-mir-93 | TCF7L1   | 0.391571457 mirna_pc |
| 3327 hsa-mir-93 | LRRCC1   | 0.339558084 mirna_pc |
| 3328 hsa-mir-93 | FAM98B   | 0.378066158 mirna_pc |
| 3329 hsa-mir-93 | BCLAF1   | 0.344019577 mirna_pc |
| 3330 hsa-mir-93 | MOXD1    | 0.327850029 mirna_pc |
| 3331 hsa-mir-93 | THAP9    | 0.338709286 mirna_pc |
| 3332 hsa-mir-93 | SF1      | 0.302426981 mirna_pc |
| 3333 hsa-mir-93 | HNRNPH3  | 0.391327443 mirna_pc |
| 3334 hsa-mir-93 | NAP1L1   | 0.340364602 mirna_pc |
| 3335 hsa-mir-93 | PEX5     | 0.416091319 mirna_pc |
| 3336 hsa-mir-93 | RABL2A   | 0.423194591 mirna_pc |
| 3337 hsa-mir-93 | NSL1     | 0.420849659 mirna_pc |
| 3338 hsa-mir-93 | CNIH2    | 0.358320838 mirna_pc |
| 3339 hsa-mir-93 | TRDMT1   | 0.365516233 mirna_pc |
| 3340 hsa-mir-93 | IQCC     | 0.393858339 mirna_pc |
| 3341 hsa-mir-93 | GATAD2B  | 0.363607115 mirna_pc |
| 3342 hsa-mir-93 | PMS1     | 0.361071868 mirna_pc |
| 3343 hsa-mir-93 | ALG10B   | 0.371988883 mirna_pc |
| 3344 hsa-mir-93 | MNS1     | 0.359004051 mirna_pc |
| 3345 hsa-mir-93 | ZSCAN21  | 0.432468956 mirna_pc |
| 3346 hsa-mir-93 | RBM16    | 0.340222222 mirna_pc |
| 3347 hsa-mir-93 | TRUB1    | 0.327212068 mirna_pc |

|                 |           |                      |
|-----------------|-----------|----------------------|
| 3348 hsa-mir-93 | PEG10     | 0.366338521 mirna_pc |
| 3349 hsa-mir-93 | CCNJ      | 0.421816529 mirna_pc |
| 3350 hsa-mir-93 | MYCN      | 0.580102954 mirna_pc |
| 3351 hsa-mir-93 | C12orf24  | 0.30735644 mirna_pc  |
| 3352 hsa-mir-93 | EFCAB7    | 0.382311396 mirna_pc |
| 3353 hsa-mir-93 | DCAF16    | 0.393255568 mirna_pc |
| 3354 hsa-mir-93 | RINT1     | 0.341258522 mirna_pc |
| 3355 hsa-mir-93 | FKBP4     | 0.314700607 mirna_pc |
| 3356 hsa-mir-93 | SBK1      | 0.473234044 mirna_pc |
| 3357 hsa-mir-93 | PPID      | 0.302774119 mirna_pc |
| 3358 hsa-mir-93 | PABPC4L   | 0.480261288 mirna_pc |
| 3359 hsa-mir-93 | C10orf137 | 0.344501449 mirna_pc |
| 3360 hsa-mir-93 | ADNP2     | 0.325682438 mirna_pc |
| 3361 hsa-mir-93 | FAM171A1  | 0.338508076 mirna_pc |
| 3362 hsa-mir-93 | THNSL1    | 0.376034144 mirna_pc |
| 3363 hsa-mir-93 | USP13     | 0.517711908 mirna_pc |
| 3364 hsa-mir-93 | GALNT14   | 0.357919478 mirna_pc |
| 3365 hsa-mir-93 | HAUS3     | 0.314644812 mirna_pc |
| 3366 hsa-mir-93 | RASL10B   | 0.355601077 mirna_pc |
| 3367 hsa-mir-93 | ZNF3      | 0.547317549 mirna_pc |
| 3368 hsa-mir-93 | CD69      | 0.45288298 mirna_pc  |
| 3369 hsa-mir-93 | DNM1P35   | 0.307082106 mirna_pc |
| 3370 hsa-mir-93 | CP110     | 0.389210709 mirna_pc |
| 3371 hsa-mir-93 | ERLIN1    | 0.323845876 mirna_pc |
| 3372 hsa-mir-93 | C16orf46  | 0.418286755 mirna_pc |
| 3373 hsa-mir-93 | MSI1      | 0.395937837 mirna_pc |
| 3374 hsa-mir-93 | CLPB      | 0.342071377 mirna_pc |
| 3375 hsa-mir-93 | SMARCC1   | 0.303797806 mirna_pc |
| 3376 hsa-mir-93 | SERTAD4   | 0.361945541 mirna_pc |
| 3377 hsa-mir-93 | SCAI      | 0.419805965 mirna_pc |
| 3378 hsa-mir-93 | GXYLT1    | 0.325126239 mirna_pc |
| 3379 hsa-mir-93 | N4BP2     | 0.365344902 mirna_pc |
| 3380 hsa-mir-93 | ZNF740    | 0.344784911 mirna_pc |
| 3381 hsa-mir-93 | EP400     | 0.331033423 mirna_pc |
| 3382 hsa-mir-93 | TRO       | 0.354186181 mirna_pc |
| 3383 hsa-mir-93 | PACRGL    | 0.42811893 mirna_pc  |
| 3384 hsa-mir-93 | SMARCA5   | 0.317923153 mirna_pc |
| 3385 hsa-mir-93 | PBX2      | 0.336732342 mirna_pc |
| 3386 hsa-mir-93 | ZNF232    | 0.471172051 mirna_pc |
| 3387 hsa-mir-93 | ZBTB39    | 0.496440164 mirna_pc |
| 3388 hsa-mir-93 | NRCAM     | 0.437956104 mirna_pc |
| 3389 hsa-mir-93 | ZNF827    | 0.314880369 mirna_pc |
| 3390 hsa-mir-93 | C20orf12  | 0.428880474 mirna_pc |
| 3391 hsa-mir-93 | FANCF     | 0.386540827 mirna_pc |
| 3392 hsa-mir-93 | VPS54     | 0.356282348 mirna_pc |
| 3393 hsa-mir-93 | RAC3      | 0.383007492 mirna_pc |
| 3394 hsa-mir-93 | ZBTB24    | 0.389562639 mirna_pc |
| 3395 hsa-mir-93 | RBBP4     | 0.398120009 mirna_pc |
| 3396 hsa-mir-93 | NCOA5     | 0.315239846 mirna_pc |
| 3397 hsa-mir-93 | CDKN1B    | 0.418301793 mirna_pc |
| 3398 hsa-mir-93 | ZNF618    | 0.394834897 mirna_pc |
| 3399 hsa-mir-93 | BRSK1     | 0.302270581 mirna_pc |
| 3400 hsa-mir-93 | C2orf3    | 0.396530477 mirna_pc |
| 3401 hsa-mir-93 | ZNF22     | 0.33890968 mirna_pc  |

|                 |           |                      |
|-----------------|-----------|----------------------|
| 3402 hsa-mir-93 | CHD4      | 0.37265127 mirna_pc  |
| 3403 hsa-mir-93 | POM121C   | 0.357503343 mirna_pc |
| 3404 hsa-mir-93 | CCDC111   | 0.355994466 mirna_pc |
| 3405 hsa-mir-93 | ZNF713    | 0.30935677 mirna_pc  |
| 3406 hsa-mir-93 | GIGYF1    | 0.469851519 mirna_pc |
| 3407 hsa-mir-93 | TIA1      | 0.340241106 mirna_pc |
| 3408 hsa-mir-93 | ZNF664    | 0.324674222 mirna_pc |
| 3409 hsa-mir-93 | RRP7B     | 0.337279694 mirna_pc |
| 3410 hsa-mir-93 | RSBN1L    | 0.317490572 mirna_pc |
| 3411 hsa-mir-93 | LRDD      | 0.381768608 mirna_pc |
| 3412 hsa-mir-93 | CCDC157   | 0.457419139 mirna_pc |
| 3413 hsa-mir-93 | PDGFA     | 0.424094253 mirna_pc |
| 3414 hsa-mir-93 | SCML2     | 0.439064914 mirna_pc |
| 3415 hsa-mir-93 | SIKE1     | 0.379098552 mirna_pc |
| 3416 hsa-mir-93 | ZNF594    | 0.345397275 mirna_pc |
| 3417 hsa-mir-93 | MRPL19    | 0.34609983 mirna_pc  |
| 3418 hsa-mir-93 | HSF2      | 0.331919102 mirna_pc |
| 3419 hsa-mir-93 | GTF2I     | 0.330165374 mirna_pc |
| 3420 hsa-mir-93 | MEPCE     | 0.480950563 mirna_pc |
| 3421 hsa-mir-93 | ZCCHC3    | 0.375224535 mirna_pc |
| 3422 hsa-mir-93 | TP53BP2   | 0.304797215 mirna_pc |
| 3423 hsa-mir-93 | ZNF644    | 0.30346905 mirna_pc  |
| 3424 hsa-mir-93 | RRP15     | 0.374542493 mirna_pc |
| 3425 hsa-mir-93 | COL9A2    | 0.313910903 mirna_pc |
| 3426 hsa-mir-93 | MSTO2P    | 0.345501437 mirna_pc |
| 3427 hsa-mir-93 | ETV5      | 0.573403097 mirna_pc |
| 3428 hsa-mir-93 | PGAP1     | 0.320176826 mirna_pc |
| 3429 hsa-mir-93 | NUCKS1    | 0.372440188 mirna_pc |
| 3430 hsa-mir-93 | KIAA1430  | 0.338728825 mirna_pc |
| 3431 hsa-mir-93 | AADAT     | 0.440612361 mirna_pc |
| 3432 hsa-mir-93 | CBLL1     | 0.448576674 mirna_pc |
| 3433 hsa-mir-93 | IGHMBP2   | 0.584360136 mirna_pc |
| 3434 hsa-mir-93 | ACTR3B    | 0.319695065 mirna_pc |
| 3435 hsa-mir-93 | ABTB2     | 0.316637066 mirna_pc |
| 3436 hsa-mir-93 | PCNP      | 0.307575912 mirna_pc |
| 3437 hsa-mir-93 | NAF1      | 0.305022099 mirna_pc |
| 3438 hsa-mir-93 | C11orf51  | 0.308784308 mirna_pc |
| 3439 hsa-mir-93 | FZD1      | 0.422656182 mirna_pc |
| 3440 hsa-mir-93 | SPRED2    | 0.325914263 mirna_pc |
| 3441 hsa-mir-93 | B4GALNT4  | 0.379767921 mirna_pc |
| 3442 hsa-mir-93 | PRMT6     | 0.365976578 mirna_pc |
| 3443 hsa-mir-93 | HSDL1     | 0.308701392 mirna_pc |
| 3444 hsa-mir-93 | PDS5A     | 0.325699262 mirna_pc |
| 3445 hsa-mir-93 | PRKRIP1   | 0.353030159 mirna_pc |
| 3446 hsa-mir-93 | PDE4B     | 0.309820877 mirna_pc |
| 3447 hsa-mir-93 | H2AFY2    | 0.37099002 mirna_pc  |
| 3448 hsa-mir-93 | FBXO48    | 0.301827905 mirna_pc |
| 3449 hsa-mir-93 | KIAA1324L | 0.336034659 mirna_pc |
| 3450 hsa-mir-93 | PHIP      | 0.314172508 mirna_pc |
| 3451 hsa-mir-93 | TRIL      | 0.44760856 mirna_pc  |
| 3452 hsa-mir-93 | PCDH18    | 0.367301076 mirna_pc |
| 3453 hsa-mir-93 | SMARCAD1  | 0.370936735 mirna_pc |
| 3454 hsa-mir-93 | DHTKD1    | 0.359459635 mirna_pc |
| 3455 hsa-mir-93 | SV2A      | 0.307032376 mirna_pc |

|                   |           |                      |
|-------------------|-----------|----------------------|
| 3456 hsa-mir-93   | SEMA4C    | 0.303518872 mirna_pc |
| 3457 hsa-mir-93   | EFNB3     | 0.39394379 mirna_pc  |
| 3458 hsa-mir-93   | CENPV     | 0.336912822 mirna_pc |
| 3459 hsa-mir-93   | DNMT3A    | 0.554559014 mirna_pc |
| 3460 hsa-mir-93   | CKAP4     | 0.325791663 mirna_pc |
| 3461 hsa-mir-93   | TET1      | 0.433884189 mirna_pc |
| 3462 hsa-mir-93   | PRTFDC1   | 0.370832255 mirna_pc |
| 3463 hsa-mir-93   | FAM200A   | 0.515156847 mirna_pc |
| 3464 hsa-mir-93   | ZNF326    | 0.384597766 mirna_pc |
| 3465 hsa-mir-93   | ZNF711    | 0.350423081 mirna_pc |
| 3466 hsa-mir-93   | POM121    | 0.363862229 mirna_pc |
| 3467 hsa-mir-3648 | SEMA3E    | 0.471788877 mirna_pc |
| 3468 hsa-mir-3648 | ANLN      | 0.349893623 mirna_pc |
| 3469 hsa-mir-3648 | NCAPG     | 0.305663105 mirna_pc |
| 3470 hsa-mir-3648 | CLSPN     | 0.300716418 mirna_pc |
| 3471 hsa-mir-3648 | DLGAP5    | 0.30686817 mirna_pc  |
| 3472 hsa-mir-3648 | EXO1      | 0.38658524 mirna_pc  |
| 3473 hsa-mir-3648 | CKS2      | 0.396159206 mirna_pc |
| 3474 hsa-mir-3648 | DEPDC1    | 0.342033311 mirna_pc |
| 3475 hsa-mir-3648 | PTTG1     | 0.30206326 mirna_pc  |
| 3476 hsa-mir-3648 | SKA1      | 0.32101457 mirna_pc  |
| 3477 hsa-mir-3648 | CENPK     | 0.339527171 mirna_pc |
| 3478 hsa-mir-3648 | PBK       | 0.37375137 mirna_pc  |
| 3479 hsa-mir-3648 | CDKN3     | 0.344531419 mirna_pc |
| 3480 hsa-mir-3648 | HMMR      | 0.346956217 mirna_pc |
| 3481 hsa-mir-3648 | CITED2    | 0.402262447 mirna_pc |
| 3482 hsa-mir-3648 | C6orf167  | 0.359866455 mirna_pc |
| 3483 hsa-mir-3648 | PTGES3    | 0.309480755 mirna_pc |
| 3484 hsa-mir-3648 | ULBP1     | 0.467503695 mirna_pc |
| 3485 hsa-mir-3648 | NR2F2     | 0.394208138 mirna_pc |
| 3486 hsa-mir-3648 | SNHG1     | 0.307085918 mirna_pc |
| 3487 hsa-mir-3648 | MLF1IP    | 0.367833564 mirna_pc |
| 3488 hsa-mir-3648 | CCDC99    | 0.322880516 mirna_pc |
| 3489 hsa-mir-3648 | FGF14     | 0.313275959 mirna_pc |
| 3490 hsa-mir-3648 | MSH2      | 0.323108484 mirna_pc |
| 3491 hsa-mir-3648 | CDC7      | 0.429708413 mirna_pc |
| 3492 hsa-mir-3648 | ARL6IP6   | 0.331394194 mirna_pc |
| 3493 hsa-mir-3648 | FBX05     | 0.325106505 mirna_pc |
| 3494 hsa-mir-3648 | SMC2      | 0.568222714 mirna_pc |
| 3495 hsa-mir-3648 | ZNF367    | 0.526858921 mirna_pc |
| 3496 hsa-mir-3648 | NCL       | 0.302451167 mirna_pc |
| 3497 hsa-mir-3648 | HIST1H1E  | 0.334723909 mirna_pc |
| 3498 hsa-mir-3648 | C13orf37  | 0.340116094 mirna_pc |
| 3499 hsa-mir-3648 | THOP1     | 0.316351833 mirna_pc |
| 3500 hsa-mir-3648 | LOC375190 | 0.314853023 mirna_pc |
| 3501 hsa-mir-3648 | CRY1      | 0.325699312 mirna_pc |
| 3502 hsa-mir-3648 | TYW3      | 0.516259524 mirna_pc |
| 3503 hsa-mir-3648 | PPAT      | 0.325836175 mirna_pc |
| 3504 hsa-mir-3648 | ACAD10    | 0.381624551 mirna_pc |
| 3505 hsa-mir-3648 | TEX10     | 0.387647979 mirna_pc |
| 3506 hsa-mir-3648 | GAD1      | 0.39263429 mirna_pc  |
| 3507 hsa-mir-3648 | RFC5      | 0.354603973 mirna_pc |
| 3508 hsa-mir-3648 | FIGN      | 0.489019504 mirna_pc |
| 3509 hsa-mir-3648 | HAUS6     | 0.321786781 mirna_pc |

|                   |           |                      |
|-------------------|-----------|----------------------|
| 3510 hsa-mir-3648 | RADIL     | 0.369676401 mirna_pc |
| 3511 hsa-mir-3648 | DENR      | 0.314280382 mirna_pc |
| 3512 hsa-mir-3648 | ALG6      | 0.310161666 mirna_pc |
| 3513 hsa-mir-3648 | PHF10     | 0.360850392 mirna_pc |
| 3514 hsa-mir-3648 | RIBC2     | 0.439438649 mirna_pc |
| 3515 hsa-mir-3648 | CAPS2     | 0.350543381 mirna_pc |
| 3516 hsa-mir-3648 | PBX3      | 0.364036784 mirna_pc |
| 3517 hsa-mir-3648 | MTHFD1    | 0.302982786 mirna_pc |
| 3518 hsa-mir-3648 | HABP4     | 0.451784199 mirna_pc |
| 3519 hsa-mir-3648 | PSMC3IP   | 0.344499934 mirna_pc |
| 3520 hsa-mir-3648 | C18orf54  | 0.300574171 mirna_pc |
| 3521 hsa-mir-3648 | CCNE2     | 0.37692398 mirna_pc  |
| 3522 hsa-mir-3648 | CTSL2     | 0.371228662 mirna_pc |
| 3523 hsa-mir-3648 | CCDC104   | 0.305379533 mirna_pc |
| 3524 hsa-mir-3648 | HNRNPK    | 0.378562325 mirna_pc |
| 3525 hsa-mir-3648 | KIAA0776  | 0.32982999 mirna_pc  |
| 3526 hsa-mir-3648 | CTNNAL1   | 0.450413483 mirna_pc |
| 3527 hsa-mir-3648 | TDG       | 0.325424449 mirna_pc |
| 3528 hsa-mir-3648 | RAD23B    | 0.336280166 mirna_pc |
| 3529 hsa-mir-3648 | CEP78     | 0.354608261 mirna_pc |
| 3530 hsa-mir-3648 | HDAC2     | 0.359323835 mirna_pc |
| 3531 hsa-mir-3648 | FAM184A   | 0.367584146 mirna_pc |
| 3532 hsa-mir-3648 | TDRD5     | 0.305942907 mirna_pc |
| 3533 hsa-mir-3648 | HAUS1     | 0.416021776 mirna_pc |
| 3534 hsa-mir-3648 | PCM1      | 0.311594932 mirna_pc |
| 3535 hsa-mir-3648 | DCK       | 0.412841304 mirna_pc |
| 3536 hsa-mir-3648 | OTUD6B    | 0.377353692 mirna_pc |
| 3537 hsa-mir-3648 | HNRNPA1   | 0.312755329 mirna_pc |
| 3538 hsa-mir-3648 | CCDC74B   | 0.31912676 mirna_pc  |
| 3539 hsa-mir-3648 | HNRNPA1L2 | 0.342196216 mirna_pc |
| 3540 hsa-mir-3648 | TMX1      | 0.30419898 mirna_pc  |
| 3541 hsa-mir-3648 | NCBP1     | 0.36910391 mirna_pc  |
| 3542 hsa-mir-3648 | FANCM     | 0.300634389 mirna_pc |
| 3543 hsa-mir-3648 | USP1      | 0.370976276 mirna_pc |
| 3544 hsa-mir-3648 | SCG2      | 0.36689011 mirna_pc  |
| 3545 hsa-mir-3648 | EDIL3     | 0.303341845 mirna_pc |
| 3546 hsa-mir-3648 | ORC3L     | 0.302672897 mirna_pc |
| 3547 hsa-mir-3648 | TCP1      | 0.330428548 mirna_pc |
| 3548 hsa-mir-3648 | SEMA3D    | 0.492422581 mirna_pc |
| 3549 hsa-mir-3648 | SLC25A30  | 0.374822323 mirna_pc |
| 3550 hsa-mir-3648 | ISCA1     | 0.345603422 mirna_pc |
| 3551 hsa-mir-3648 | C13orf27  | 0.323586745 mirna_pc |
| 3552 hsa-mir-3648 | KSR2      | 0.442870275 mirna_pc |
| 3553 hsa-mir-3648 | CCDC41    | 0.380922309 mirna_pc |
| 3554 hsa-mir-3648 | NOL8      | 0.303426344 mirna_pc |
| 3555 hsa-mir-3648 | GPN3      | 0.359835808 mirna_pc |
| 3556 hsa-mir-3648 | THSD7A    | 0.398507381 mirna_pc |
| 3557 hsa-mir-3648 | ISCA1P1   | 0.346022541 mirna_pc |
| 3558 hsa-mir-3648 | PSIP1     | 0.421578408 mirna_pc |
| 3559 hsa-mir-3648 | PCGF6     | 0.321390325 mirna_pc |
| 3560 hsa-mir-3648 | OSR2      | 0.300360741 mirna_pc |
| 3561 hsa-mir-3648 | C12orf76  | 0.361656776 mirna_pc |
| 3562 hsa-mir-3648 | C6orf170  | 0.339524593 mirna_pc |
| 3563 hsa-mir-3648 | KIAA0020  | 0.30717041 mirna_pc  |

|                   |           |                      |
|-------------------|-----------|----------------------|
| 3564 hsa-mir-3648 | SENP6     | 0.305972449 mirna_pc |
| 3565 hsa-mir-3648 | METAP2    | 0.324625334 mirna_pc |
| 3566 hsa-mir-3648 | NUDCD2    | 0.360145968 mirna_pc |
| 3567 hsa-mir-3648 | PIK3C3    | 0.309321342 mirna_pc |
| 3568 hsa-mir-3648 | PHTF2     | 0.328800828 mirna_pc |
| 3569 hsa-mir-3648 | CNIH      | 0.31520053 mirna_pc  |
| 3570 hsa-mir-3648 | PPP1CC    | 0.317557235 mirna_pc |
| 3571 hsa-mir-3648 | SNHG5     | 0.329132672 mirna_pc |
| 3572 hsa-mir-3648 | RMI1      | 0.418775417 mirna_pc |
| 3573 hsa-mir-3648 | TMEM67    | 0.340089012 mirna_pc |
| 3574 hsa-mir-3648 | DRG1      | 0.322395276 mirna_pc |
| 3575 hsa-mir-3648 | PSMD5     | 0.34970247 mirna_pc  |
| 3576 hsa-mir-3648 | ACTR6     | 0.323797904 mirna_pc |
| 3577 hsa-mir-3648 | SFRS13A   | 0.33466691 mirna_pc  |
| 3578 hsa-mir-3648 | KPNA5     | 0.306162555 mirna_pc |
| 3579 hsa-mir-3648 | MYBL1     | 0.455727788 mirna_pc |
| 3580 hsa-mir-3648 | PAPOLA    | 0.35581906 mirna_pc  |
| 3581 hsa-mir-3648 | TMEM38B   | 0.414629505 mirna_pc |
| 3582 hsa-mir-3648 | GAS1      | 0.31203078 mirna_pc  |
| 3583 hsa-mir-3648 | EFNA5     | 0.312643604 mirna_pc |
| 3584 hsa-mir-3648 | MRPL42    | 0.324279249 mirna_pc |
| 3585 hsa-mir-3648 | CRNKL1    | 0.305141688 mirna_pc |
| 3586 hsa-mir-3648 | CCDC78    | 0.38588161 mirna_pc  |
| 3587 hsa-mir-3648 | DNM3      | 0.447320322 mirna_pc |
| 3588 hsa-mir-3648 | WDR78     | 0.405443678 mirna_pc |
| 3589 hsa-mir-3648 | CROCC1    | 0.343713924 mirna_pc |
| 3590 hsa-mir-3648 | ZNF184    | 0.331045296 mirna_pc |
| 3591 hsa-mir-3648 | NIPSNAP1  | 0.301012169 mirna_pc |
| 3592 hsa-mir-3648 | C8orf37   | 0.468186373 mirna_pc |
| 3593 hsa-mir-3648 | PDGFC     | 0.43792333 mirna_pc  |
| 3594 hsa-mir-3648 | SPA17     | 0.312899327 mirna_pc |
| 3595 hsa-mir-3648 | SFI1      | 0.330883847 mirna_pc |
| 3596 hsa-mir-3648 | MAP3K12   | 0.314995068 mirna_pc |
| 3597 hsa-mir-3648 | ZBTB10    | 0.341505872 mirna_pc |
| 3598 hsa-mir-3648 | TTC21B    | 0.338834609 mirna_pc |
| 3599 hsa-mir-3648 | ANGPT1    | 0.480424884 mirna_pc |
| 3600 hsa-mir-3648 | DNAJA1    | 0.349821962 mirna_pc |
| 3601 hsa-mir-3648 | LOC338758 | 0.39311322 mirna_pc  |
| 3602 hsa-mir-3648 | ETV1      | 0.332163179 mirna_pc |
| 3603 hsa-mir-3648 | CPT1C     | 0.309052278 mirna_pc |
| 3604 hsa-mir-3648 | GPR137C   | 0.424111811 mirna_pc |
| 3605 hsa-mir-3648 | UBQLN1    | 0.318841906 mirna_pc |
| 3606 hsa-mir-3648 | CEP110    | 0.397017543 mirna_pc |
| 3607 hsa-mir-3648 | POLR3F    | 0.349954569 mirna_pc |
| 3608 hsa-mir-3648 | TMX3      | 0.32708196 mirna_pc  |
| 3609 hsa-mir-3648 | GRB14     | 0.330197878 mirna_pc |
| 3610 hsa-mir-3648 | TIMM9     | 0.325235243 mirna_pc |
| 3611 hsa-mir-3648 | HTR7P1    | 0.347947813 mirna_pc |
| 3612 hsa-mir-3648 | TGFB2     | 0.360913161 mirna_pc |
| 3613 hsa-mir-3648 | BCLAF1    | 0.309020455 mirna_pc |
| 3614 hsa-mir-3648 | CROCC     | 0.357254759 mirna_pc |
| 3615 hsa-mir-3648 | B4GALT6   | 0.327898109 mirna_pc |
| 3616 hsa-mir-3648 | FADS1     | 0.316668464 mirna_pc |
| 3617 hsa-mir-3648 | C6orf182  | 0.321996594 mirna_pc |

|                   |           |                      |
|-------------------|-----------|----------------------|
| 3618 hsa-mir-3648 | CNIH2     | 0.313756841 mirna_pc |
| 3619 hsa-mir-3648 | EID3      | 0.464651858 mirna_pc |
| 3620 hsa-mir-3648 | MNS1      | 0.311730683 mirna_pc |
| 3621 hsa-mir-3648 | KIAA1467  | 0.426567869 mirna_pc |
| 3622 hsa-mir-3648 | PLAC2     | 0.312202994 mirna_pc |
| 3623 hsa-mir-3648 | LYPLAL1   | 0.302800939 mirna_pc |
| 3624 hsa-mir-3648 | C12orf24  | 0.536535525 mirna_pc |
| 3625 hsa-mir-3648 | GLS2      | 0.448812 mirna_pc    |
| 3626 hsa-mir-3648 | SEMA3A    | 0.4990976 mirna_pc   |
| 3627 hsa-mir-3648 | USP13     | 0.31101111 mirna_pc  |
| 3628 hsa-mir-3648 | ESF1      | 0.346017756 mirna_pc |
| 3629 hsa-mir-3648 | IFT74     | 0.49390002 mirna_pc  |
| 3630 hsa-mir-3648 | MDM1      | 0.465109042 mirna_pc |
| 3631 hsa-mir-3648 | C6orf162  | 0.350225877 mirna_pc |
| 3632 hsa-mir-3648 | LRRC40    | 0.35417441 mirna_pc  |
| 3633 hsa-mir-3648 | SLITRK6   | 0.408784104 mirna_pc |
| 3634 hsa-mir-3648 | ERGIC2    | 0.404233932 mirna_pc |
| 3635 hsa-mir-3648 | HAPLN1    | 0.529081842 mirna_pc |
| 3636 hsa-mir-3648 | LOC221710 | 0.320431134 mirna_pc |
| 3637 hsa-mir-3648 | CRYZ      | 0.405360427 mirna_pc |
| 3638 hsa-mir-3648 | SMEK2     | 0.306054783 mirna_pc |
| 3639 hsa-mir-3648 | C20orf96  | 0.323375162 mirna_pc |
| 3640 hsa-mir-3648 | HSF2      | 0.341080311 mirna_pc |
| 3641 hsa-mir-3648 | RSRC2     | 0.30634266 mirna_pc  |
| 3642 hsa-mir-3648 | IKBKAP    | 0.323986486 mirna_pc |
| 3643 hsa-mir-3648 | ASF1A     | 0.31417341 mirna_pc  |
| 3644 hsa-mir-3648 | CTXN1     | 0.359952258 mirna_pc |
| 3645 hsa-mir-3648 | TMEM20    | 0.391400067 mirna_pc |
| 3646 hsa-mir-3648 | ZNF680    | 0.373253573 mirna_pc |
| 3647 hsa-mir-3648 | C9orf21   | 0.381782514 mirna_pc |
| 3648 hsa-mir-3648 | C5orf54   | 0.306423656 mirna_pc |
| 3649 hsa-mir-3648 | LOC283070 | 0.37471221 mirna_pc  |
| 3650 hsa-mir-3648 | SLC11A2   | 0.342394294 mirna_pc |
| 3651 hsa-mir-3648 | HEY2      | 0.385576365 mirna_pc |
| 3652 hsa-mir-3648 | ZFP37     | 0.351642342 mirna_pc |
| 3653 hsa-mir-3648 | PHIP      | 0.317773352 mirna_pc |
| 3654 hsa-mir-3648 | NDUFAF4   | 0.376534358 mirna_pc |
| 3655 hsa-mir-3648 | LCA5      | 0.447747982 mirna_pc |
| 3656 hsa-mir-3648 | C20orf7   | 0.302560091 mirna_pc |
| 3657 hsa-mir-3648 | CDC73     | 0.308727465 mirna_pc |
| 3658 hsa-mir-3648 | SLC2A3    | 0.325833927 mirna_pc |
| 3659 hsa-mir-3648 | CNIH3     | 0.351487179 mirna_pc |
| 3660 hsa-mir-3648 | WDSUB1    | 0.328036271 mirna_pc |
| 3661 hsa-mir-3648 | BRAP      | 0.302996377 mirna_pc |
| 3662 hsa-mir-3648 | AGTPBP1   | 0.387696748 mirna_pc |
| 3663 hsa-mir-18a  | TPX2      | 0.441092708 mirna_pc |
| 3664 hsa-mir-18a  | KIF4B     | 0.368651013 mirna_pc |
| 3665 hsa-mir-18a  | TOP2A     | 0.325508349 mirna_pc |
| 3666 hsa-mir-18a  | KPNA2     | 0.338975802 mirna_pc |
| 3667 hsa-mir-18a  | CENPF     | 0.300418386 mirna_pc |
| 3668 hsa-mir-18a  | HOXC9     | 0.375969324 mirna_pc |
| 3669 hsa-mir-18a  | KIF11     | 0.354882955 mirna_pc |
| 3670 hsa-mir-18a  | ECT2      | 0.304920728 mirna_pc |
| 3671 hsa-mir-18a  | RRM2      | 0.438362433 mirna_pc |



|                  |           |                      |
|------------------|-----------|----------------------|
| 3672 hsa-mir-18a | CDK1      | 0.398168302 mirna_pc |
| 3673 hsa-mir-18a | CDC25C    | 0.390995591 mirna_pc |
| 3674 hsa-mir-18a | MYBL2     | 0.37728832 mirna_pc  |
| 3675 hsa-mir-18a | PLK1      | 0.326127196 mirna_pc |
| 3676 hsa-mir-18a | UBE2C     | 0.517272141 mirna_pc |
| 3677 hsa-mir-18a | BUB1      | 0.464997492 mirna_pc |
| 3678 hsa-mir-18a | KIFC1     | 0.403977744 mirna_pc |
| 3679 hsa-mir-18a | BUB1B     | 0.448691807 mirna_pc |
| 3680 hsa-mir-18a | HDGF      | 0.424664415 mirna_pc |
| 3681 hsa-mir-18a | KIF18B    | 0.414630599 mirna_pc |
| 3682 hsa-mir-18a | FAM72A    | 0.353925158 mirna_pc |
| 3683 hsa-mir-18a | KIF2C     | 0.395854915 mirna_pc |
| 3684 hsa-mir-18a | FANCA     | 0.413688012 mirna_pc |
| 3685 hsa-mir-18a | NCAPG     | 0.432184505 mirna_pc |
| 3686 hsa-mir-18a | CDC20     | 0.332477376 mirna_pc |
| 3687 hsa-mir-18a | CLSPN     | 0.401754949 mirna_pc |
| 3688 hsa-mir-18a | SGOL1     | 0.485329598 mirna_pc |
| 3689 hsa-mir-18a | ARHGAP11A | 0.383135777 mirna_pc |
| 3690 hsa-mir-18a | CCNA2     | 0.391791753 mirna_pc |
| 3691 hsa-mir-18a | CDC25B    | 0.324763399 mirna_pc |
| 3692 hsa-mir-18a | CBX3      | 0.437592508 mirna_pc |
| 3693 hsa-mir-18a | SPC25     | 0.445853886 mirna_pc |
| 3694 hsa-mir-18a | IQGAP3    | 0.329681889 mirna_pc |
| 3695 hsa-mir-18a | NUP62     | 0.305953415 mirna_pc |
| 3696 hsa-mir-18a | FANCI     | 0.332668954 mirna_pc |
| 3697 hsa-mir-18a | FAM54A    | 0.370460254 mirna_pc |
| 3698 hsa-mir-18a | NEK2      | 0.493287201 mirna_pc |
| 3699 hsa-mir-18a | MND1      | 0.39252974 mirna_pc  |
| 3700 hsa-mir-18a | HOXC11    | 0.338224488 mirna_pc |
| 3701 hsa-mir-18a | KIF22     | 0.374468409 mirna_pc |
| 3702 hsa-mir-18a | NCAPH     | 0.413093338 mirna_pc |
| 3703 hsa-mir-18a | GTSE1     | 0.359076142 mirna_pc |
| 3704 hsa-mir-18a | KIF23     | 0.32812361 mirna_pc  |
| 3705 hsa-mir-18a | RAD54L    | 0.407763706 mirna_pc |
| 3706 hsa-mir-18a | CENPA     | 0.394730108 mirna_pc |
| 3707 hsa-mir-18a | MAD2L1    | 0.507553135 mirna_pc |
| 3708 hsa-mir-18a | TIMELESS  | 0.394974823 mirna_pc |
| 3709 hsa-mir-18a | LMNB1     | 0.363413489 mirna_pc |
| 3710 hsa-mir-18a | DLGAP5    | 0.337428513 mirna_pc |
| 3711 hsa-mir-18a | CDCA8     | 0.456994498 mirna_pc |
| 3712 hsa-mir-18a | TROAP     | 0.405608556 mirna_pc |
| 3713 hsa-mir-18a | CCNB1     | 0.330985766 mirna_pc |
| 3714 hsa-mir-18a | CDCA5     | 0.351916622 mirna_pc |
| 3715 hsa-mir-18a | TACC3     | 0.312583314 mirna_pc |
| 3716 hsa-mir-18a | XP01      | 0.391474073 mirna_pc |
| 3717 hsa-mir-18a | STMN1     | 0.349446762 mirna_pc |
| 3718 hsa-mir-18a | CDCA2     | 0.366008626 mirna_pc |
| 3719 hsa-mir-18a | HMGA1     | 0.302007622 mirna_pc |
| 3720 hsa-mir-18a | DKC1      | 0.367425226 mirna_pc |
| 3721 hsa-mir-18a | UBE2T     | 0.333862537 mirna_pc |
| 3722 hsa-mir-18a | CKS2      | 0.323728315 mirna_pc |
| 3723 hsa-mir-18a | CKS1B     | 0.31661041 mirna_pc  |
| 3724 hsa-mir-18a | KIAA0101  | 0.330794403 mirna_pc |
| 3725 hsa-mir-18a | KIF4A     | 0.401078275 mirna_pc |

|                  |          |                      |
|------------------|----------|----------------------|
| 3726 hsa-mir-18a | ORC1L    | 0.356403666 mirna_pc |
| 3727 hsa-mir-18a | SNRPB    | 0.326446164 mirna_pc |
| 3728 hsa-mir-18a | KNTC1    | 0.421948544 mirna_pc |
| 3729 hsa-mir-18a | CCNB2    | 0.327417564 mirna_pc |
| 3730 hsa-mir-18a | NUF2     | 0.4995642 mirna_pc   |
| 3731 hsa-mir-18a | PLK4     | 0.468368981 mirna_pc |
| 3732 hsa-mir-18a | FANCB    | 0.348078935 mirna_pc |
| 3733 hsa-mir-18a | KIF18A   | 0.408760373 mirna_pc |
| 3734 hsa-mir-18a | DEPDC1   | 0.387729287 mirna_pc |
| 3735 hsa-mir-18a | SKA3     | 0.521074447 mirna_pc |
| 3736 hsa-mir-18a | KIF14    | 0.311846246 mirna_pc |
| 3737 hsa-mir-18a | HJURP    | 0.459035577 mirna_pc |
| 3738 hsa-mir-18a | SKA1     | 0.37493929 mirna_pc  |
| 3739 hsa-mir-18a | BLM      | 0.435876891 mirna_pc |
| 3740 hsa-mir-18a | NME1     | 0.477540862 mirna_pc |
| 3741 hsa-mir-18a | PAICS    | 0.437524344 mirna_pc |
| 3742 hsa-mir-18a | CCDC150  | 0.53394456 mirna_pc  |
| 3743 hsa-mir-18a | RCC1     | 0.430949937 mirna_pc |
| 3744 hsa-mir-18a | OIP5     | 0.36085796 mirna_pc  |
| 3745 hsa-mir-18a | DTL      | 0.341903443 mirna_pc |
| 3746 hsa-mir-18a | EME1     | 0.380886254 mirna_pc |
| 3747 hsa-mir-18a | RECQL4   | 0.447733527 mirna_pc |
| 3748 hsa-mir-18a | AURKA    | 0.470493332 mirna_pc |
| 3749 hsa-mir-18a | CENPK    | 0.417659193 mirna_pc |
| 3750 hsa-mir-18a | AURKB    | 0.406864307 mirna_pc |
| 3751 hsa-mir-18a | MCM10    | 0.404373375 mirna_pc |
| 3752 hsa-mir-18a | SGOL2    | 0.458415382 mirna_pc |
| 3753 hsa-mir-18a | CHEK2    | 0.33489323 mirna_pc  |
| 3754 hsa-mir-18a | CENPE    | 0.368943583 mirna_pc |
| 3755 hsa-mir-18a | KIF15    | 0.416310721 mirna_pc |
| 3756 hsa-mir-18a | CDCA3    | 0.417943375 mirna_pc |
| 3757 hsa-mir-18a | C1orf112 | 0.480651958 mirna_pc |
| 3758 hsa-mir-18a | GINS1    | 0.403497041 mirna_pc |
| 3759 hsa-mir-18a | FEN1     | 0.355823737 mirna_pc |
| 3760 hsa-mir-18a | TRAIP    | 0.427953313 mirna_pc |
| 3761 hsa-mir-18a | ORC6L    | 0.392720284 mirna_pc |
| 3762 hsa-mir-18a | ERH      | 0.364913864 mirna_pc |
| 3763 hsa-mir-18a | PBK      | 0.339280212 mirna_pc |
| 3764 hsa-mir-18a | C16orf59 | 0.346740028 mirna_pc |
| 3765 hsa-mir-18a | CDKN3    | 0.354024437 mirna_pc |
| 3766 hsa-mir-18a | RAE1     | 0.351038112 mirna_pc |
| 3767 hsa-mir-18a | FAM72D   | 0.359179289 mirna_pc |
| 3768 hsa-mir-18a | FAM72B   | 0.397658088 mirna_pc |
| 3769 hsa-mir-18a | EZH2     | 0.343555101 mirna_pc |
| 3770 hsa-mir-18a | NEIL3    | 0.308552414 mirna_pc |
| 3771 hsa-mir-18a | C12orf48 | 0.474168287 mirna_pc |
| 3772 hsa-mir-18a | HNRNPL   | 0.432092523 mirna_pc |
| 3773 hsa-mir-18a | ZWILCH   | 0.305493863 mirna_pc |
| 3774 hsa-mir-18a | HMMR     | 0.364419639 mirna_pc |
| 3775 hsa-mir-18a | TTK      | 0.404879273 mirna_pc |
| 3776 hsa-mir-18a | ZWINT    | 0.445614622 mirna_pc |
| 3777 hsa-mir-18a | TUBA1B   | 0.319393689 mirna_pc |
| 3778 hsa-mir-18a | WDR67    | 0.325848994 mirna_pc |
| 3779 hsa-mir-18a | HOXC6    | 0.339496538 mirna_pc |

|                  |           |                      |
|------------------|-----------|----------------------|
| 3780 hsa-mir-18a | BUB3      | 0.399836783 mirna_pc |
| 3781 hsa-mir-18a | HELLS     | 0.376090971 mirna_pc |
| 3782 hsa-mir-18a | POLE2     | 0.378459249 mirna_pc |
| 3783 hsa-mir-18a | HNRNPC    | 0.374441998 mirna_pc |
| 3784 hsa-mir-18a | ILF2      | 0.312966199 mirna_pc |
| 3785 hsa-mir-18a | C6orf167  | 0.329757658 mirna_pc |
| 3786 hsa-mir-18a | CHEK1     | 0.402763899 mirna_pc |
| 3787 hsa-mir-18a | HNRNPA2B1 | 0.471637846 mirna_pc |
| 3788 hsa-mir-18a | RAN       | 0.337900287 mirna_pc |
| 3789 hsa-mir-18a | TYMS      | 0.34004037 mirna_pc  |
| 3790 hsa-mir-18a | C20orf20  | 0.377895202 mirna_pc |
| 3791 hsa-mir-18a | MCM6      | 0.403373903 mirna_pc |
| 3792 hsa-mir-18a | CDC6      | 0.31297008 mirna_pc  |
| 3793 hsa-mir-18a | CDC47     | 0.368776244 mirna_pc |
| 3794 hsa-mir-18a | EPR1      | 0.341279837 mirna_pc |
| 3795 hsa-mir-18a | PIF1      | 0.440083582 mirna_pc |
| 3796 hsa-mir-18a | H2AFX     | 0.361727858 mirna_pc |
| 3797 hsa-mir-18a | SFRS2     | 0.355402943 mirna_pc |
| 3798 hsa-mir-18a | DCAF13    | 0.383941343 mirna_pc |
| 3799 hsa-mir-18a | MTHFD1L   | 0.309951426 mirna_pc |
| 3800 hsa-mir-18a | PSMD14    | 0.314518481 mirna_pc |
| 3801 hsa-mir-18a | UCK2      | 0.424581204 mirna_pc |
| 3802 hsa-mir-18a | NFKBIL2   | 0.391990054 mirna_pc |
| 3803 hsa-mir-18a | PTGES3    | 0.310163128 mirna_pc |
| 3804 hsa-mir-18a | FAM60A    | 0.404525709 mirna_pc |
| 3805 hsa-mir-18a | ATAD5     | 0.349545563 mirna_pc |
| 3806 hsa-mir-18a | SNRPG     | 0.438594045 mirna_pc |
| 3807 hsa-mir-18a | TH1L      | 0.313767007 mirna_pc |
| 3808 hsa-mir-18a | KIF20B    | 0.382043786 mirna_pc |
| 3809 hsa-mir-18a | SNRPA     | 0.41478512 mirna_pc  |
| 3810 hsa-mir-18a | FUS       | 0.332420024 mirna_pc |
| 3811 hsa-mir-18a | ATAD2     | 0.322549712 mirna_pc |
| 3812 hsa-mir-18a | U2AF2     | 0.304382918 mirna_pc |
| 3813 hsa-mir-18a | RFC3      | 0.461837975 mirna_pc |
| 3814 hsa-mir-18a | DEPDC1B   | 0.538250971 mirna_pc |
| 3815 hsa-mir-18a | HOXA11    | 0.30294697 mirna_pc  |
| 3816 hsa-mir-18a | ANP32E    | 0.378732603 mirna_pc |
| 3817 hsa-mir-18a | CENPO     | 0.425173354 mirna_pc |
| 3818 hsa-mir-18a | XRCC2     | 0.314288316 mirna_pc |
| 3819 hsa-mir-18a | C19orf48  | 0.321070615 mirna_pc |
| 3820 hsa-mir-18a | BAX       | 0.309929176 mirna_pc |
| 3821 hsa-mir-18a | CENPL     | 0.346895119 mirna_pc |
| 3822 hsa-mir-18a | GEN1      | 0.341767531 mirna_pc |
| 3823 hsa-mir-18a | HMGB2     | 0.442176162 mirna_pc |
| 3824 hsa-mir-18a | DNA2      | 0.467079097 mirna_pc |
| 3825 hsa-mir-18a | NOP56     | 0.458537535 mirna_pc |
| 3826 hsa-mir-18a | SNRPD1    | 0.334714769 mirna_pc |
| 3827 hsa-mir-18a | DSN1      | 0.393471281 mirna_pc |
| 3828 hsa-mir-18a | SNHG1     | 0.38790135 mirna_pc  |
| 3829 hsa-mir-18a | CSE1L     | 0.344420621 mirna_pc |
| 3830 hsa-mir-18a | DTYMK     | 0.466343383 mirna_pc |
| 3831 hsa-mir-18a | MLF1IP    | 0.393006751 mirna_pc |
| 3832 hsa-mir-18a | HSPE1     | 0.447755699 mirna_pc |
| 3833 hsa-mir-18a | CCDC99    | 0.40594164 mirna_pc  |

|      |             |          |             |          |
|------|-------------|----------|-------------|----------|
| 3834 | hsa-mir-18a | CDK2     | 0.400976781 | mirna_pc |
| 3835 | hsa-mir-18a | CDK4     | 0.329454542 | mirna_pc |
| 3836 | hsa-mir-18a | PFDN2    | 0.326939593 | mirna_pc |
| 3837 | hsa-mir-18a | TPM3     | 0.3053522   | mirna_pc |
| 3838 | hsa-mir-18a | BCL2L12  | 0.434462854 | mirna_pc |
| 3839 | hsa-mir-18a | HNRNPR   | 0.316858784 | mirna_pc |
| 3840 | hsa-mir-18a | DLEU2    | 0.401978481 | mirna_pc |
| 3841 | hsa-mir-18a | PRIM1    | 0.40531298  | mirna_pc |
| 3842 | hsa-mir-18a | KAT2A    | 0.308208913 | mirna_pc |
| 3843 | hsa-mir-18a | PSMC4    | 0.403841422 | mirna_pc |
| 3844 | hsa-mir-18a | GGCT     | 0.321548152 | mirna_pc |
| 3845 | hsa-mir-18a | DDX27    | 0.421003808 | mirna_pc |
| 3846 | hsa-mir-18a | TCOF1    | 0.387308229 | mirna_pc |
| 3847 | hsa-mir-18a | HOXC10   | 0.323308407 | mirna_pc |
| 3848 | hsa-mir-18a | NCAPG2   | 0.31147421  | mirna_pc |
| 3849 | hsa-mir-18a | MSH2     | 0.409808619 | mirna_pc |
| 3850 | hsa-mir-18a | SALL4    | 0.396985259 | mirna_pc |
| 3851 | hsa-mir-18a | EIF3B    | 0.365606268 | mirna_pc |
| 3852 | hsa-mir-18a | NOP58    | 0.424640255 | mirna_pc |
| 3853 | hsa-mir-18a | DBF4     | 0.365230917 | mirna_pc |
| 3854 | hsa-mir-18a | TOMM40   | 0.351403495 | mirna_pc |
| 3855 | hsa-mir-18a | EIF2AK1  | 0.32748956  | mirna_pc |
| 3856 | hsa-mir-18a | CDC7     | 0.388735431 | mirna_pc |
| 3857 | hsa-mir-18a | SSB      | 0.569086939 | mirna_pc |
| 3858 | hsa-mir-18a | PUS1     | 0.437273309 | mirna_pc |
| 3859 | hsa-mir-18a | NOL11    | 0.377906995 | mirna_pc |
| 3860 | hsa-mir-18a | SNRPC    | 0.441938348 | mirna_pc |
| 3861 | hsa-mir-18a | FBXO5    | 0.476522051 | mirna_pc |
| 3862 | hsa-mir-18a | WDR75    | 0.375724295 | mirna_pc |
| 3863 | hsa-mir-18a | FIGNL1   | 0.322161678 | mirna_pc |
| 3864 | hsa-mir-18a | MDK      | 0.303572796 | mirna_pc |
| 3865 | hsa-mir-18a | E2F3     | 0.522599574 | mirna_pc |
| 3866 | hsa-mir-18a | DDX11    | 0.320469845 | mirna_pc |
| 3867 | hsa-mir-18a | SF3B14   | 0.341758939 | mirna_pc |
| 3868 | hsa-mir-18a | RUVBL2   | 0.369744286 | mirna_pc |
| 3869 | hsa-mir-18a | CDC25A   | 0.499460352 | mirna_pc |
| 3870 | hsa-mir-18a | TMEM48   | 0.318358734 | mirna_pc |
| 3871 | hsa-mir-18a | RAD54B   | 0.373923389 | mirna_pc |
| 3872 | hsa-mir-18a | H2AFZ    | 0.327378637 | mirna_pc |
| 3873 | hsa-mir-18a | MAGOH    | 0.314123771 | mirna_pc |
| 3874 | hsa-mir-18a | DSCC1    | 0.397155578 | mirna_pc |
| 3875 | hsa-mir-18a | WDR12    | 0.333184408 | mirna_pc |
| 3876 | hsa-mir-18a | C13orf34 | 0.434064873 | mirna_pc |
| 3877 | hsa-mir-18a | SRPK1    | 0.327457543 | mirna_pc |
| 3878 | hsa-mir-18a | MCM8     | 0.459305568 | mirna_pc |
| 3879 | hsa-mir-18a | CPSF3    | 0.418205729 | mirna_pc |
| 3880 | hsa-mir-18a | SNRPE    | 0.430545965 | mirna_pc |
| 3881 | hsa-mir-18a | C21orf45 | 0.441208775 | mirna_pc |
| 3882 | hsa-mir-18a | ATIC     | 0.469729676 | mirna_pc |
| 3883 | hsa-mir-18a | UTP6     | 0.302751099 | mirna_pc |
| 3884 | hsa-mir-18a | PPM1G    | 0.352971962 | mirna_pc |
| 3885 | hsa-mir-18a | MARCKSL1 | 0.337100866 | mirna_pc |
| 3886 | hsa-mir-18a | NPM3     | 0.302833812 | mirna_pc |
| 3887 | hsa-mir-18a | NUTF2    | 0.338129479 | mirna_pc |

|                  |              |                      |
|------------------|--------------|----------------------|
| 3888 hsa-mir-18a | DAZAP1       | 0.37389393 mirna_pc  |
| 3889 hsa-mir-18a | CBX8         | 0.37282152 mirna_pc  |
| 3890 hsa-mir-18a | RPA3         | 0.309658215 mirna_pc |
| 3891 hsa-mir-18a | TRMT6        | 0.324013078 mirna_pc |
| 3892 hsa-mir-18a | GNPDA1       | 0.311385744 mirna_pc |
| 3893 hsa-mir-18a | WDR34        | 0.301151326 mirna_pc |
| 3894 hsa-mir-18a | NCL          | 0.447655762 mirna_pc |
| 3895 hsa-mir-18a | NUDCD1       | 0.318114167 mirna_pc |
| 3896 hsa-mir-18a | PFDN4        | 0.438373231 mirna_pc |
| 3897 hsa-mir-18a | PAFAH1B3     | 0.319919005 mirna_pc |
| 3898 hsa-mir-18a | SRRT         | 0.399421714 mirna_pc |
| 3899 hsa-mir-18a | CACYBP       | 0.414086427 mirna_pc |
| 3900 hsa-mir-18a | SASS6        | 0.428966321 mirna_pc |
| 3901 hsa-mir-18a | PSRC1        | 0.50443289 mirna_pc  |
| 3902 hsa-mir-18a | DGUOK        | 0.338733124 mirna_pc |
| 3903 hsa-mir-18a | DBF4B        | 0.400302086 mirna_pc |
| 3904 hsa-mir-18a | POU2F1       | 0.417231392 mirna_pc |
| 3905 hsa-mir-18a | FBL          | 0.422082933 mirna_pc |
| 3906 hsa-mir-18a | C13orf37     | 0.372367151 mirna_pc |
| 3907 hsa-mir-18a | HNRNPM       | 0.353356596 mirna_pc |
| 3908 hsa-mir-18a | LSM 12.00    | 0.359766327 mirna_pc |
| 3909 hsa-mir-18a | PNPT1        | 0.434329117 mirna_pc |
| 3910 hsa-mir-18a | TMPO         | 0.41647127 mirna_pc  |
| 3911 hsa-mir-18a | SET          | 0.347589928 mirna_pc |
| 3912 hsa-mir-18a | LOC388796    | 0.435979801 mirna_pc |
| 3913 hsa-mir-18a | MRT04        | 0.37535209 mirna_pc  |
| 3914 hsa-mir-18a | GABPB1       | 0.409719248 mirna_pc |
| 3915 hsa-mir-18a | PPIH         | 0.399675318 mirna_pc |
| 3916 hsa-mir-18a | RCN1         | 0.328147389 mirna_pc |
| 3917 hsa-mir-18a | PPAT         | 0.340821222 mirna_pc |
| 3918 hsa-mir-18a | DHX9         | 0.334691345 mirna_pc |
| 3919 hsa-mir-18a | CCDC138      | 0.359992817 mirna_pc |
| 3920 hsa-mir-18a | LOC100128191 | 0.37068313 mirna_pc  |
| 3921 hsa-mir-18a | HMG2         | 0.39775118 mirna_pc  |
| 3922 hsa-mir-18a | ETV4         | 0.433500777 mirna_pc |
| 3923 hsa-mir-18a | SMYD5        | 0.330838104 mirna_pc |
| 3924 hsa-mir-18a | TSSC1        | 0.327640105 mirna_pc |
| 3925 hsa-mir-18a | TLCD1        | 0.326536536 mirna_pc |
| 3926 hsa-mir-18a | SNRPF        | 0.378046431 mirna_pc |
| 3927 hsa-mir-18a | SFRS1        | 0.530298988 mirna_pc |
| 3928 hsa-mir-18a | CASP8        | 0.318412171 mirna_pc |
| 3929 hsa-mir-18a | WDR43        | 0.420143206 mirna_pc |
| 3930 hsa-mir-18a | SNRPA1       | 0.43657584 mirna_pc  |
| 3931 hsa-mir-18a | CCDC58       | 0.314956009 mirna_pc |
| 3932 hsa-mir-18a | TIPIN        | 0.357868559 mirna_pc |
| 3933 hsa-mir-18a | HSPBP1       | 0.368116499 mirna_pc |
| 3934 hsa-mir-18a | C4orf46      | 0.394345564 mirna_pc |
| 3935 hsa-mir-18a | DNMT3B       | 0.312630609 mirna_pc |
| 3936 hsa-mir-18a | DARS2        | 0.365947628 mirna_pc |
| 3937 hsa-mir-18a | LYAR         | 0.489840457 mirna_pc |
| 3938 hsa-mir-18a | UTP14A       | 0.403624582 mirna_pc |
| 3939 hsa-mir-18a | HSPD1        | 0.508989085 mirna_pc |
| 3940 hsa-mir-18a | SSRP1        | 0.345375211 mirna_pc |
| 3941 hsa-mir-18a | POLR2D       | 0.430967717 mirna_pc |

|                  |          |                      |
|------------------|----------|----------------------|
| 3942 hsa-mir-18a | FTSJ2    | 0.388861133 mirna_pc |
| 3943 hsa-mir-18a | PTRH2    | 0.324116293 mirna_pc |
| 3944 hsa-mir-18a | PA2G4    | 0.457039022 mirna_pc |
| 3945 hsa-mir-18a | KHDRBS1  | 0.393531764 mirna_pc |
| 3946 hsa-mir-18a | SLC5A6   | 0.343073479 mirna_pc |
| 3947 hsa-mir-18a | TOMM34   | 0.341972077 mirna_pc |
| 3948 hsa-mir-18a | MTL 5.00 | 0.387286266 mirna_pc |
| 3949 hsa-mir-18a | PRPF40A  | 0.337193452 mirna_pc |
| 3950 hsa-mir-18a | CCDC18   | 0.361416828 mirna_pc |
| 3951 hsa-mir-18a | AHCY     | 0.348587431 mirna_pc |
| 3952 hsa-mir-18a | CCDC34   | 0.462546989 mirna_pc |
| 3953 hsa-mir-18a | DNAJC2   | 0.397402554 mirna_pc |
| 3954 hsa-mir-18a | HNRNPF   | 0.369409978 mirna_pc |
| 3955 hsa-mir-18a | SLC39A10 | 0.415058397 mirna_pc |
| 3956 hsa-mir-18a | SUV420H2 | 0.360374819 mirna_pc |
| 3957 hsa-mir-18a | ZNF695   | 0.526317839 mirna_pc |
| 3958 hsa-mir-18a | PDSS1    | 0.444181349 mirna_pc |
| 3959 hsa-mir-18a | HAUS6    | 0.340399884 mirna_pc |
| 3960 hsa-mir-18a | PSMA1    | 0.304190103 mirna_pc |
| 3961 hsa-mir-18a | CENPJ    | 0.317759789 mirna_pc |
| 3962 hsa-mir-18a | GNL2     | 0.310570402 mirna_pc |
| 3963 hsa-mir-18a | HNRNPU   | 0.355694755 mirna_pc |
| 3964 hsa-mir-18a | NOC2L    | 0.302174123 mirna_pc |
| 3965 hsa-mir-18a | NASP     | 0.475070065 mirna_pc |
| 3966 hsa-mir-18a | POLR1B   | 0.417463104 mirna_pc |
| 3967 hsa-mir-18a | OBFC2B   | 0.407287143 mirna_pc |
| 3968 hsa-mir-18a | PTMA     | 0.463450424 mirna_pc |
| 3969 hsa-mir-18a | PSMD1    | 0.402105468 mirna_pc |
| 3970 hsa-mir-18a | DDX56    | 0.308686351 mirna_pc |
| 3971 hsa-mir-18a | DENR     | 0.365674917 mirna_pc |
| 3972 hsa-mir-18a | SCARB1   | 0.378485562 mirna_pc |
| 3973 hsa-mir-18a | C11orf84 | 0.307574077 mirna_pc |
| 3974 hsa-mir-18a | TBCE     | 0.372904548 mirna_pc |
| 3975 hsa-mir-18a | SUV39H2  | 0.4738558 mirna_pc   |
| 3976 hsa-mir-18a | LSM 2.00 | 0.39597907 mirna_pc  |
| 3977 hsa-mir-18a | FANCL    | 0.355526114 mirna_pc |
| 3978 hsa-mir-18a | HNRNPD   | 0.441804681 mirna_pc |
| 3979 hsa-mir-18a | DPY30    | 0.359435725 mirna_pc |
| 3980 hsa-mir-18a | MTHFD2   | 0.314530289 mirna_pc |
| 3981 hsa-mir-18a | GTF2F2   | 0.36499423 mirna_pc  |
| 3982 hsa-mir-18a | GTPBP4   | 0.36765358 mirna_pc  |
| 3983 hsa-mir-18a | TARDBP   | 0.316150318 mirna_pc |
| 3984 hsa-mir-18a | POP1     | 0.312096274 mirna_pc |
| 3985 hsa-mir-18a | NFE2L3   | 0.407466029 mirna_pc |
| 3986 hsa-mir-18a | SFRS3    | 0.452303482 mirna_pc |
| 3987 hsa-mir-18a | LSM 5.00 | 0.466249005 mirna_pc |
| 3988 hsa-mir-18a | CCT4     | 0.327043772 mirna_pc |
| 3989 hsa-mir-18a | RAD9A    | 0.308150114 mirna_pc |
| 3990 hsa-mir-18a | C7orf40  | 0.350623705 mirna_pc |
| 3991 hsa-mir-18a | KIAA0406 | 0.355088802 mirna_pc |
| 3992 hsa-mir-18a | DPM1     | 0.304942241 mirna_pc |
| 3993 hsa-mir-18a | HSP90B1  | 0.41312436 mirna_pc  |
| 3994 hsa-mir-18a | NAE1     | 0.343164005 mirna_pc |
| 3995 hsa-mir-18a | PSMC3IP  | 0.341108632 mirna_pc |

|                  |          |                      |
|------------------|----------|----------------------|
| 3996 hsa-mir-18a | PAK1IP1  | 0.468038066 mirna_pc |
| 3997 hsa-mir-18a | NUDT15   | 0.368731019 mirna_pc |
| 3998 hsa-mir-18a | E2F4     | 0.3145801 mirna_pc   |
| 3999 hsa-mir-18a | SLMO2    | 0.323156698 mirna_pc |
| 4000 hsa-mir-18a | PFDN6    | 0.323541945 mirna_pc |
| 4001 hsa-mir-18a | TWISTNB  | 0.35758079 mirna_pc  |
| 4002 hsa-mir-18a | DHFR     | 0.304597165 mirna_pc |
| 4003 hsa-mir-18a | NAA25    | 0.359680001 mirna_pc |
| 4004 hsa-mir-18a | ILF3     | 0.353030104 mirna_pc |
| 4005 hsa-mir-18a | NT5DC2   | 0.312541884 mirna_pc |
| 4006 hsa-mir-18a | EHMT2    | 0.387666222 mirna_pc |
| 4007 hsa-mir-18a | MMD      | 0.332725735 mirna_pc |
| 4008 hsa-mir-18a | HNRNPAB  | 0.353268053 mirna_pc |
| 4009 hsa-mir-18a | DEK      | 0.400426162 mirna_pc |
| 4010 hsa-mir-18a | TBC1D4   | 0.316276714 mirna_pc |
| 4011 hsa-mir-18a | SFRS9    | 0.336483136 mirna_pc |
| 4012 hsa-mir-18a | TRIB3    | 0.345329887 mirna_pc |
| 4013 hsa-mir-18a | PASK     | 0.401118121 mirna_pc |
| 4014 hsa-mir-18a | SAAL1    | 0.392941421 mirna_pc |
| 4015 hsa-mir-18a | C1orf131 | 0.359508352 mirna_pc |
| 4016 hsa-mir-18a | TAF4     | 0.38121334 mirna_pc  |
| 4017 hsa-mir-18a | TGS1     | 0.306037044 mirna_pc |
| 4018 hsa-mir-18a | SNHG3    | 0.316285159 mirna_pc |
| 4019 hsa-mir-18a | HEATR2   | 0.533590448 mirna_pc |
| 4020 hsa-mir-18a | LSM 6.00 | 0.312267308 mirna_pc |
| 4021 hsa-mir-18a | PRAME    | 0.340340132 mirna_pc |
| 4022 hsa-mir-18a | CYB5B    | 0.356660871 mirna_pc |
| 4023 hsa-mir-18a | SNRPB2   | 0.460453953 mirna_pc |
| 4024 hsa-mir-18a | GLO1     | 0.363204688 mirna_pc |
| 4025 hsa-mir-18a | MSL3L2   | 0.330857703 mirna_pc |
| 4026 hsa-mir-18a | SART3    | 0.304599481 mirna_pc |
| 4027 hsa-mir-18a | TRAF4    | 0.34269533 mirna_pc  |
| 4028 hsa-mir-18a | GAR1     | 0.436230056 mirna_pc |
| 4029 hsa-mir-18a | CEP152   | 0.315969295 mirna_pc |
| 4030 hsa-mir-18a | C15orf23 | 0.383810293 mirna_pc |
| 4031 hsa-mir-18a | PRMT3    | 0.327867934 mirna_pc |
| 4032 hsa-mir-18a | RPL36A   | 0.361574248 mirna_pc |
| 4033 hsa-mir-18a | PSMD12   | 0.303243628 mirna_pc |
| 4034 hsa-mir-18a | C1orf174 | 0.320676984 mirna_pc |
| 4035 hsa-mir-18a | IGF2BP2  | 0.315189491 mirna_pc |
| 4036 hsa-mir-18a | WHSC1    | 0.311485329 mirna_pc |
| 4037 hsa-mir-18a | RPN2     | 0.34340779 mirna_pc  |
| 4038 hsa-mir-18a | SAE1     | 0.364116274 mirna_pc |
| 4039 hsa-mir-18a | MRPL17   | 0.334286471 mirna_pc |
| 4040 hsa-mir-18a | RNF219   | 0.397591915 mirna_pc |
| 4041 hsa-mir-18a | ITGB3BP  | 0.449243109 mirna_pc |
| 4042 hsa-mir-18a | EIF2S2   | 0.411479987 mirna_pc |
| 4043 hsa-mir-18a | SLC25A32 | 0.309052082 mirna_pc |
| 4044 hsa-mir-18a | ENOPH1   | 0.343254846 mirna_pc |
| 4045 hsa-mir-18a | PABPC1L  | 0.330833602 mirna_pc |
| 4046 hsa-mir-18a | C17orf42 | 0.36223562 mirna_pc  |
| 4047 hsa-mir-18a | DNAJC7   | 0.331249973 mirna_pc |
| 4048 hsa-mir-18a | TSEN54   | 0.347048557 mirna_pc |
| 4049 hsa-mir-18a | ACTR5    | 0.364521444 mirna_pc |

|                  |           |                      |
|------------------|-----------|----------------------|
| 4050 hsa-mir-18a | HSPA14    | 0.300165554 mirna_pc |
| 4051 hsa-mir-18a | DDX55     | 0.505104506 mirna_pc |
| 4052 hsa-mir-18a | HPDL      | 0.450571315 mirna_pc |
| 4053 hsa-mir-18a | CDK5RAP1  | 0.344911845 mirna_pc |
| 4054 hsa-mir-18a | SFPQ      | 0.353504371 mirna_pc |
| 4055 hsa-mir-18a | POMP      | 0.318354674 mirna_pc |
| 4056 hsa-mir-18a | VPS72     | 0.309416549 mirna_pc |
| 4057 hsa-mir-18a | RCOR2     | 0.387468266 mirna_pc |
| 4058 hsa-mir-18a | ATAD3A    | 0.348843503 mirna_pc |
| 4059 hsa-mir-18a | HDAC2     | 0.46738592 mirna_pc  |
| 4060 hsa-mir-18a | GMNN      | 0.437661788 mirna_pc |
| 4061 hsa-mir-18a | PDCD2L    | 0.308775075 mirna_pc |
| 4062 hsa-mir-18a | PA2G4P4   | 0.453543204 mirna_pc |
| 4063 hsa-mir-18a | POLG2     | 0.329461146 mirna_pc |
| 4064 hsa-mir-18a | GEMIN6    | 0.45406889 mirna_pc  |
| 4065 hsa-mir-18a | MRPL11    | 0.30204495 mirna_pc  |
| 4066 hsa-mir-18a | TPRKB     | 0.348932537 mirna_pc |
| 4067 hsa-mir-18a | PSMD13    | 0.316475479 mirna_pc |
| 4068 hsa-mir-18a | TCEB1     | 0.335647042 mirna_pc |
| 4069 hsa-mir-18a | KPNB1     | 0.419650644 mirna_pc |
| 4070 hsa-mir-18a | SMC3      | 0.363295099 mirna_pc |
| 4071 hsa-mir-18a | FLVCR1    | 0.37362202 mirna_pc  |
| 4072 hsa-mir-18a | HNRNPA1   | 0.363398222 mirna_pc |
| 4073 hsa-mir-18a | NPM1      | 0.34601644 mirna_pc  |
| 4074 hsa-mir-18a | NUDT3     | 0.320761586 mirna_pc |
| 4075 hsa-mir-18a | AGMAT     | 0.397640174 mirna_pc |
| 4076 hsa-mir-18a | MEX3A     | 0.471685746 mirna_pc |
| 4077 hsa-mir-18a | BAT1      | 0.467666161 mirna_pc |
| 4078 hsa-mir-18a | DHX37     | 0.300192199 mirna_pc |
| 4079 hsa-mir-18a | COIL      | 0.435318634 mirna_pc |
| 4080 hsa-mir-18a | PHF14     | 0.374721639 mirna_pc |
| 4081 hsa-mir-18a | LIPG      | 0.332263012 mirna_pc |
| 4082 hsa-mir-18a | MSH5      | 0.307476441 mirna_pc |
| 4083 hsa-mir-18a | ERAL1     | 0.36989261 mirna_pc  |
| 4084 hsa-mir-18a | TAF5      | 0.381488664 mirna_pc |
| 4085 hsa-mir-18a | C2orf29   | 0.308013928 mirna_pc |
| 4086 hsa-mir-18a | ACAN      | 0.320136095 mirna_pc |
| 4087 hsa-mir-18a | HNRNPA1L2 | 0.413414905 mirna_pc |
| 4088 hsa-mir-18a | HMGB1     | 0.474568781 mirna_pc |
| 4089 hsa-mir-18a | ZBTB12    | 0.401646506 mirna_pc |
| 4090 hsa-mir-18a | DIAPH3    | 0.318498674 mirna_pc |
| 4091 hsa-mir-18a | DUSP12    | 0.354400928 mirna_pc |
| 4092 hsa-mir-18a | TGIF2     | 0.397667289 mirna_pc |
| 4093 hsa-mir-18a | FARSB     | 0.453425449 mirna_pc |
| 4094 hsa-mir-18a | PIK3AP1   | 0.333840969 mirna_pc |
| 4095 hsa-mir-18a | SNX5      | 0.301130142 mirna_pc |
| 4096 hsa-mir-18a | THUMP2    | 0.362854306 mirna_pc |
| 4097 hsa-mir-18a | FAM96A    | 0.340816352 mirna_pc |
| 4098 hsa-mir-18a | SC65      | 0.349831776 mirna_pc |
| 4099 hsa-mir-18a | MTF2      | 0.43116057 mirna_pc  |
| 4100 hsa-mir-18a | FGFR10P   | 0.426675685 mirna_pc |
| 4101 hsa-mir-18a | PHB       | 0.346729953 mirna_pc |
| 4102 hsa-mir-18a | NOL10     | 0.450649272 mirna_pc |
| 4103 hsa-mir-18a | POLE      | 0.428356759 mirna_pc |



|                  |           |                      |
|------------------|-----------|----------------------|
| 4104 hsa-mir-18a | C8orf30A  | 0.326922397 mirna_pc |
| 4105 hsa-mir-18a | C1orf163  | 0.33781652 mirna_pc  |
| 4106 hsa-mir-18a | RRP8      | 0.339910438 mirna_pc |
| 4107 hsa-mir-18a | HMBS      | 0.383903543 mirna_pc |
| 4108 hsa-mir-18a | TRIAP1    | 0.404930633 mirna_pc |
| 4109 hsa-mir-18a | SOX9      | 0.329499343 mirna_pc |
| 4110 hsa-mir-18a | TIMM50    | 0.472589252 mirna_pc |
| 4111 hsa-mir-18a | VRK1      | 0.379646104 mirna_pc |
| 4112 hsa-mir-18a | RBMX2     | 0.335030788 mirna_pc |
| 4113 hsa-mir-18a | C13orf27  | 0.458548541 mirna_pc |
| 4114 hsa-mir-18a | DDOST     | 0.300731378 mirna_pc |
| 4115 hsa-mir-18a | EXOSC9    | 0.365477955 mirna_pc |
| 4116 hsa-mir-18a | TMEM209   | 0.306020333 mirna_pc |
| 4117 hsa-mir-18a | MXD3      | 0.30173017 mirna_pc  |
| 4118 hsa-mir-18a | CCDC43    | 0.394765326 mirna_pc |
| 4119 hsa-mir-18a | RBMX      | 0.47630788 mirna_pc  |
| 4120 hsa-mir-18a | C6orf134  | 0.301954546 mirna_pc |
| 4121 hsa-mir-18a | RRS1      | 0.315976114 mirna_pc |
| 4122 hsa-mir-18a | CCDC41    | 0.378304215 mirna_pc |
| 4123 hsa-mir-18a | UCLH3     | 0.328376368 mirna_pc |
| 4124 hsa-mir-18a | DAP3      | 0.405114892 mirna_pc |
| 4125 hsa-mir-18a | CCDC90A   | 0.336115504 mirna_pc |
| 4126 hsa-mir-18a | C9orf142  | 0.303627614 mirna_pc |
| 4127 hsa-mir-18a | ATAD3B    | 0.418919894 mirna_pc |
| 4128 hsa-mir-18a | XRCC5     | 0.368485103 mirna_pc |
| 4129 hsa-mir-18a | RPF2      | 0.42265151 mirna_pc  |
| 4130 hsa-mir-18a | EXOSC8    | 0.415638851 mirna_pc |
| 4131 hsa-mir-18a | C11orf48  | 0.31345319 mirna_pc  |
| 4132 hsa-mir-18a | TAF1D     | 0.410041875 mirna_pc |
| 4133 hsa-mir-18a | PDIA6     | 0.399140085 mirna_pc |
| 4134 hsa-mir-18a | GPN3      | 0.311474278 mirna_pc |
| 4135 hsa-mir-18a | RPE       | 0.308287621 mirna_pc |
| 4136 hsa-mir-18a | LBR       | 0.399467265 mirna_pc |
| 4137 hsa-mir-18a | SCLT1     | 0.358070726 mirna_pc |
| 4138 hsa-mir-18a | DDX10     | 0.361644167 mirna_pc |
| 4139 hsa-mir-18a | LTV1      | 0.411894691 mirna_pc |
| 4140 hsa-mir-18a | PCGF6     | 0.303289115 mirna_pc |
| 4141 hsa-mir-18a | OSTC      | 0.344257274 mirna_pc |
| 4142 hsa-mir-18a | FAM136A   | 0.556900247 mirna_pc |
| 4143 hsa-mir-18a | MRPS5     | 0.355882367 mirna_pc |
| 4144 hsa-mir-18a | UBE2V1    | 0.322043448 mirna_pc |
| 4145 hsa-mir-18a | SMN2      | 0.355809439 mirna_pc |
| 4146 hsa-mir-18a | MYB       | 0.359780194 mirna_pc |
| 4147 hsa-mir-18a | ARID3A    | 0.320674399 mirna_pc |
| 4148 hsa-mir-18a | MTPAP     | 0.323510726 mirna_pc |
| 4149 hsa-mir-18a | ITPRIPL1  | 0.379273553 mirna_pc |
| 4150 hsa-mir-18a | RBM17     | 0.361724615 mirna_pc |
| 4151 hsa-mir-18a | GDPD5     | 0.364681083 mirna_pc |
| 4152 hsa-mir-18a | CALM2     | 0.328838261 mirna_pc |
| 4153 hsa-mir-18a | GPATCH4   | 0.46798915 mirna_pc  |
| 4154 hsa-mir-18a | MPHOSPH10 | 0.308000443 mirna_pc |
| 4155 hsa-mir-18a | SNORA8    | 0.434603743 mirna_pc |
| 4156 hsa-mir-18a | EML4      | 0.372092079 mirna_pc |
| 4157 hsa-mir-18a | RPS7      | 0.32825702 mirna_pc  |

|                  |           |                      |
|------------------|-----------|----------------------|
| 4158 hsa-mir-18a | BZW2      | 0.488917726 mirna_pc |
| 4159 hsa-mir-18a | PABPN1    | 0.367158932 mirna_pc |
| 4160 hsa-mir-18a | LOC401010 | 0.324217853 mirna_pc |
| 4161 hsa-mir-18a | RPIA      | 0.489797743 mirna_pc |
| 4162 hsa-mir-18a | ZNRD1     | 0.31383322 mirna_pc  |
| 4163 hsa-mir-18a | BCL7A     | 0.303467161 mirna_pc |
| 4164 hsa-mir-18a | C7orf44   | 0.362107694 mirna_pc |
| 4165 hsa-mir-18a | TRPA1     | 0.360185847 mirna_pc |
| 4166 hsa-mir-18a | C8orf59   | 0.300566942 mirna_pc |
| 4167 hsa-mir-18a | NAT9      | 0.324898948 mirna_pc |
| 4168 hsa-mir-18a | RP9       | 0.449488682 mirna_pc |
| 4169 hsa-mir-18a | KIAA1731  | 0.40194277 mirna_pc  |
| 4170 hsa-mir-18a | ZNF286A   | 0.315608668 mirna_pc |
| 4171 hsa-mir-18a | SFXN4     | 0.390354346 mirna_pc |
| 4172 hsa-mir-18a | PRPF38A   | 0.304141206 mirna_pc |
| 4173 hsa-mir-18a | ALG8      | 0.351531634 mirna_pc |
| 4174 hsa-mir-18a | WDR77     | 0.441857575 mirna_pc |
| 4175 hsa-mir-18a | MRPL21    | 0.339248571 mirna_pc |
| 4176 hsa-mir-18a | TCEA1     | 0.369284882 mirna_pc |
| 4177 hsa-mir-18a | RBM28     | 0.393232059 mirna_pc |
| 4178 hsa-mir-18a | TAF11     | 0.321858591 mirna_pc |
| 4179 hsa-mir-18a | RANBP17   | 0.34631892 mirna_pc  |
| 4180 hsa-mir-18a | LACTB2    | 0.306428417 mirna_pc |
| 4181 hsa-mir-18a | UPF3B     | 0.406343205 mirna_pc |
| 4182 hsa-mir-18a | PPP1CC    | 0.308525395 mirna_pc |
| 4183 hsa-mir-18a | ILKAP     | 0.35981802 mirna_pc  |
| 4184 hsa-mir-18a | C13orf23  | 0.322755601 mirna_pc |
| 4185 hsa-mir-18a | SPATA2    | 0.32529922 mirna_pc  |
| 4186 hsa-mir-18a | TAF4B     | 0.31313051 mirna_pc  |
| 4187 hsa-mir-18a | RBM12     | 0.321780341 mirna_pc |
| 4188 hsa-mir-18a | RDH14     | 0.301977445 mirna_pc |
| 4189 hsa-mir-18a | SLC25A13  | 0.317485361 mirna_pc |
| 4190 hsa-mir-18a | PDF       | 0.328211627 mirna_pc |
| 4191 hsa-mir-18a | DDX20     | 0.391407348 mirna_pc |
| 4192 hsa-mir-18a | RNF34     | 0.389089917 mirna_pc |
| 4193 hsa-mir-18a | CHD7      | 0.419830292 mirna_pc |
| 4194 hsa-mir-18a | TOP 1.00  | 0.363765413 mirna_pc |
| 4195 hsa-mir-18a | RPGR      | 0.302745735 mirna_pc |
| 4196 hsa-mir-18a | UBE2N     | 0.395089078 mirna_pc |
| 4197 hsa-mir-18a | ZNF593    | 0.362542845 mirna_pc |
| 4198 hsa-mir-18a | TCERG1    | 0.403823409 mirna_pc |
| 4199 hsa-mir-18a | SEC61A2   | 0.310015876 mirna_pc |
| 4200 hsa-mir-18a | PSPC1     | 0.391581473 mirna_pc |
| 4201 hsa-mir-18a | MAPKAPK5  | 0.41620595 mirna_pc  |
| 4202 hsa-mir-18a | E2F6      | 0.465149456 mirna_pc |
| 4203 hsa-mir-18a | ZNF833    | 0.377040008 mirna_pc |
| 4204 hsa-mir-18a | NOL7      | 0.351703999 mirna_pc |
| 4205 hsa-mir-18a | SLC25A15  | 0.420116136 mirna_pc |
| 4206 hsa-mir-18a | B4GALT3   | 0.329908779 mirna_pc |
| 4207 hsa-mir-18a | SFRS13A   | 0.474482942 mirna_pc |
| 4208 hsa-mir-18a | SS18L2    | 0.30361034 mirna_pc  |
| 4209 hsa-mir-18a | SCLY      | 0.451984304 mirna_pc |
| 4210 hsa-mir-18a | NUP35     | 0.390157976 mirna_pc |
| 4211 hsa-mir-18a | TGDS      | 0.365235716 mirna_pc |

|                  |           |                      |
|------------------|-----------|----------------------|
| 4212 hsa-mir-18a | TFAM      | 0.473361937 mirna_pc |
| 4213 hsa-mir-18a | CCDC59    | 0.316427083 mirna_pc |
| 4214 hsa-mir-18a | DHRS13    | 0.323330431 mirna_pc |
| 4215 hsa-mir-18a | ORC4L     | 0.341495286 mirna_pc |
| 4216 hsa-mir-18a | ZC3H15    | 0.401850928 mirna_pc |
| 4217 hsa-mir-18a | MTIF2     | 0.434770225 mirna_pc |
| 4218 hsa-mir-18a | KRTCAP3   | 0.302829958 mirna_pc |
| 4219 hsa-mir-18a | EWSR1     | 0.367485708 mirna_pc |
| 4220 hsa-mir-18a | LOC222699 | 0.301947406 mirna_pc |
| 4221 hsa-mir-18a | NUPL1     | 0.350757505 mirna_pc |
| 4222 hsa-mir-18a | UBE2CBP   | 0.397235089 mirna_pc |
| 4223 hsa-mir-18a | ACVR2B    | 0.334062126 mirna_pc |
| 4224 hsa-mir-18a | WBP4      | 0.304466694 mirna_pc |
| 4225 hsa-mir-18a | RP9P      | 0.372266244 mirna_pc |
| 4226 hsa-mir-18a | SMUG1     | 0.313765864 mirna_pc |
| 4227 hsa-mir-18a | SUGT1     | 0.327502233 mirna_pc |
| 4228 hsa-mir-18a | NR2C1     | 0.308816351 mirna_pc |
| 4229 hsa-mir-18a | PRELID1   | 0.315451284 mirna_pc |
| 4230 hsa-mir-18a | MRPS26    | 0.31670217 mirna_pc  |
| 4231 hsa-mir-18a | GNL3      | 0.366414937 mirna_pc |
| 4232 hsa-mir-18a | METTL5    | 0.340091607 mirna_pc |
| 4233 hsa-mir-18a | DPP4      | 0.307154407 mirna_pc |
| 4234 hsa-mir-18a | UPF3A     | 0.355237498 mirna_pc |
| 4235 hsa-mir-18a | SFRS7     | 0.443441438 mirna_pc |
| 4236 hsa-mir-18a | MRPL42    | 0.388283624 mirna_pc |
| 4237 hsa-mir-18a | C9orf100  | 0.344185499 mirna_pc |
| 4238 hsa-mir-18a | SLC25A19  | 0.401458182 mirna_pc |
| 4239 hsa-mir-18a | BEND3     | 0.400552978 mirna_pc |
| 4240 hsa-mir-18a | FGFR4     | 0.400401937 mirna_pc |
| 4241 hsa-mir-18a | LOC151534 | 0.317687909 mirna_pc |
| 4242 hsa-mir-18a | NFXL1     | 0.331687812 mirna_pc |
| 4243 hsa-mir-18a | PFAS      | 0.361909608 mirna_pc |
| 4244 hsa-mir-18a | C7orf36   | 0.408108311 mirna_pc |
| 4245 hsa-mir-18a | CCAR1     | 0.42444992 mirna_pc  |
| 4246 hsa-mir-18a | PDCD2     | 0.369264238 mirna_pc |
| 4247 hsa-mir-18a | SERBP1    | 0.348345838 mirna_pc |
| 4248 hsa-mir-18a | SPA17     | 0.332510851 mirna_pc |
| 4249 hsa-mir-18a | C11orf57  | 0.353583465 mirna_pc |
| 4250 hsa-mir-18a | LOC147804 | 0.314747808 mirna_pc |
| 4251 hsa-mir-18a | SLC35F2   | 0.325194044 mirna_pc |
| 4252 hsa-mir-18a | ING1      | 0.318530371 mirna_pc |
| 4253 hsa-mir-18a | TPMT      | 0.335698418 mirna_pc |
| 4254 hsa-mir-18a | EEF1E1    | 0.431722866 mirna_pc |
| 4255 hsa-mir-18a | ZNF697    | 0.330154359 mirna_pc |
| 4256 hsa-mir-18a | MRPL44    | 0.364433209 mirna_pc |
| 4257 hsa-mir-18a | PTCD3     | 0.344018271 mirna_pc |
| 4258 hsa-mir-18a | SPRY4     | 0.375741315 mirna_pc |
| 4259 hsa-mir-18a | IWS1      | 0.321897894 mirna_pc |
| 4260 hsa-mir-18a | CASP6     | 0.367468353 mirna_pc |
| 4261 hsa-mir-18a | ZNF92     | 0.338343859 mirna_pc |
| 4262 hsa-mir-18a | C12orf45  | 0.322862892 mirna_pc |
| 4263 hsa-mir-18a | SEPHS1    | 0.378281636 mirna_pc |
| 4264 hsa-mir-18a | CTR9      | 0.320463591 mirna_pc |
| 4265 hsa-mir-18a | RMND1     | 0.327362809 mirna_pc |

|                  |           |                      |
|------------------|-----------|----------------------|
| 4266 hsa-mir-18a | RNF216L   | 0.316340374 mirna_pc |
| 4267 hsa-mir-18a | ZNF259    | 0.30075503 mirna_pc  |
| 4268 hsa-mir-18a | RSL1D1    | 0.314088774 mirna_pc |
| 4269 hsa-mir-18a | BOLA3     | 0.323251258 mirna_pc |
| 4270 hsa-mir-18a | MYL6B     | 0.310897866 mirna_pc |
| 4271 hsa-mir-18a | MRP63     | 0.311630937 mirna_pc |
| 4272 hsa-mir-18a | IPO5      | 0.441263973 mirna_pc |
| 4273 hsa-mir-18a | C2orf47   | 0.380755906 mirna_pc |
| 4274 hsa-mir-18a | C6orf211  | 0.352639108 mirna_pc |
| 4275 hsa-mir-18a | GET4      | 0.314265014 mirna_pc |
| 4276 hsa-mir-18a | DPAGT1    | 0.404837305 mirna_pc |
| 4277 hsa-mir-18a | GPR137C   | 0.316909424 mirna_pc |
| 4278 hsa-mir-18a | NARS2     | 0.393585293 mirna_pc |
| 4279 hsa-mir-18a | NUP43     | 0.396961953 mirna_pc |
| 4280 hsa-mir-18a | LYRM4     | 0.356527955 mirna_pc |
| 4281 hsa-mir-18a | ZNF124    | 0.316497511 mirna_pc |
| 4282 hsa-mir-18a | LOC388955 | 0.321236912 mirna_pc |
| 4283 hsa-mir-18a | RNASEH2B  | 0.3281747 mirna_pc   |
| 4284 hsa-mir-18a | CHD1L     | 0.435095801 mirna_pc |
| 4285 hsa-mir-18a | ZNF473    | 0.402336286 mirna_pc |
| 4286 hsa-mir-18a | SNRNP48   | 0.363884609 mirna_pc |
| 4287 hsa-mir-18a | DCLRE1A   | 0.305972152 mirna_pc |
| 4288 hsa-mir-18a | ANP32A    | 0.486707313 mirna_pc |
| 4289 hsa-mir-18a | CHCHD7    | 0.339704073 mirna_pc |
| 4290 hsa-mir-18a | E2F5      | 0.474352033 mirna_pc |
| 4291 hsa-mir-18a | NUFIP1    | 0.424560234 mirna_pc |
| 4292 hsa-mir-18a | ZNF195    | 0.552394952 mirna_pc |
| 4293 hsa-mir-18a | RBM25     | 0.303536185 mirna_pc |
| 4294 hsa-mir-18a | PRKAR1B   | 0.301864991 mirna_pc |
| 4295 hsa-mir-18a | LRRCC1    | 0.337597 mirna_pc    |
| 4296 hsa-mir-18a | ASNSD1    | 0.330635715 mirna_pc |
| 4297 hsa-mir-18a | HYLS1     | 0.345433902 mirna_pc |
| 4298 hsa-mir-18a | NEK3      | 0.334633629 mirna_pc |
| 4299 hsa-mir-18a | HIC2      | 0.31779112 mirna_pc  |
| 4300 hsa-mir-18a | HNRNPH3   | 0.307979552 mirna_pc |
| 4301 hsa-mir-18a | NAP1L1    | 0.317045515 mirna_pc |
| 4302 hsa-mir-18a | SNF8      | 0.318047412 mirna_pc |
| 4303 hsa-mir-18a | C1orf156  | 0.315966797 mirna_pc |
| 4304 hsa-mir-18a | C6orf182  | 0.343785979 mirna_pc |
| 4305 hsa-mir-18a | VIL1      | 0.369910214 mirna_pc |
| 4306 hsa-mir-18a | GSDMB     | 0.308011992 mirna_pc |
| 4307 hsa-mir-18a | TMEM170A  | 0.335127141 mirna_pc |
| 4308 hsa-mir-18a | PHF16     | 0.329555525 mirna_pc |
| 4309 hsa-mir-18a | BCCIP     | 0.33030615 mirna_pc  |
| 4310 hsa-mir-18a | IQCC      | 0.321023445 mirna_pc |
| 4311 hsa-mir-18a | PMS1      | 0.396808882 mirna_pc |
| 4312 hsa-mir-18a | TRMT11    | 0.300434468 mirna_pc |
| 4313 hsa-mir-18a | PNN       | 0.329797072 mirna_pc |
| 4314 hsa-mir-18a | MNS1      | 0.320798179 mirna_pc |
| 4315 hsa-mir-18a | ZNF485    | 0.330788984 mirna_pc |
| 4316 hsa-mir-18a | MORN2     | 0.342561428 mirna_pc |
| 4317 hsa-mir-18a | KIN       | 0.315356965 mirna_pc |
| 4318 hsa-mir-18a | UGT8      | 0.304632417 mirna_pc |
| 4319 hsa-mir-18a | PEG10     | 0.313310665 mirna_pc |

|                  |          |                      |
|------------------|----------|----------------------|
| 4320 hsa-mir-18a | CCNJ     | 0.461058816 mirna_pc |
| 4321 hsa-mir-18a | MYCN     | 0.318182925 mirna_pc |
| 4322 hsa-mir-18a | IPO7     | 0.365746266 mirna_pc |
| 4323 hsa-mir-18a | FAM171A1 | 0.3253008 mirna_pc   |
| 4324 hsa-mir-18a | ABCC4    | 0.353974682 mirna_pc |
| 4325 hsa-mir-18a | ESF1     | 0.345773253 mirna_pc |
| 4326 hsa-mir-18a | CCDC84   | 0.317239652 mirna_pc |
| 4327 hsa-mir-18a | SLC25A33 | 0.431423648 mirna_pc |
| 4328 hsa-mir-18a | ZNF26    | 0.328832806 mirna_pc |
| 4329 hsa-mir-18a | GTF2H2C  | 0.370809317 mirna_pc |
| 4330 hsa-mir-18a | CTPS2    | 0.357173828 mirna_pc |
| 4331 hsa-mir-18a | GXYLT1   | 0.349731448 mirna_pc |
| 4332 hsa-mir-18a | HNF1A    | 0.309685405 mirna_pc |
| 4333 hsa-mir-18a | BCS1L    | 0.347913667 mirna_pc |
| 4334 hsa-mir-18a | C2orf56  | 0.348104559 mirna_pc |
| 4335 hsa-mir-18a | DDX51    | 0.351770295 mirna_pc |
| 4336 hsa-mir-18a | PBX2     | 0.323858255 mirna_pc |
| 4337 hsa-mir-18a | LRRC40   | 0.309708267 mirna_pc |
| 4338 hsa-mir-18a | SNCAIP   | 0.336659016 mirna_pc |
| 4339 hsa-mir-18a | ZNF232   | 0.422255523 mirna_pc |
| 4340 hsa-mir-18a | RNF32    | 0.345171506 mirna_pc |
| 4341 hsa-mir-18a | SNRNP27  | 0.314026823 mirna_pc |
| 4342 hsa-mir-18a | MRPL16   | 0.31171613 mirna_pc  |
| 4343 hsa-mir-18a | ENO3     | 0.328481616 mirna_pc |
| 4344 hsa-mir-18a | IFT88    | 0.417714866 mirna_pc |
| 4345 hsa-mir-18a | STARD3NL | 0.32057269 mirna_pc  |
| 4346 hsa-mir-18a | QRSL1    | 0.320797707 mirna_pc |
| 4347 hsa-mir-18a | FANCF    | 0.448054161 mirna_pc |
| 4348 hsa-mir-18a | VPS54    | 0.317162843 mirna_pc |
| 4349 hsa-mir-18a | HYOU1    | 0.328907202 mirna_pc |
| 4350 hsa-mir-18a | XYLB     | 0.360287326 mirna_pc |
| 4351 hsa-mir-18a | CIAO1    | 0.387395843 mirna_pc |
| 4352 hsa-mir-18a | C2orf3   | 0.425003613 mirna_pc |
| 4353 hsa-mir-18a | ZNF22    | 0.404950891 mirna_pc |
| 4354 hsa-mir-18a | FAM119A  | 0.458030979 mirna_pc |
| 4355 hsa-mir-18a | GOLT1A   | 0.402678536 mirna_pc |
| 4356 hsa-mir-18a | PDGFA    | 0.304584431 mirna_pc |
| 4357 hsa-mir-18a | CSPP1    | 0.305107366 mirna_pc |
| 4358 hsa-mir-18a | C20orf96 | 0.352586669 mirna_pc |
| 4359 hsa-mir-18a | SCML2    | 0.352777357 mirna_pc |
| 4360 hsa-mir-18a | MRPL19   | 0.379442672 mirna_pc |
| 4361 hsa-mir-18a | ZCCHC3   | 0.500935744 mirna_pc |
| 4362 hsa-mir-18a | RRP15    | 0.389607384 mirna_pc |
| 4363 hsa-mir-18a | ADAT2    | 0.390021176 mirna_pc |
| 4364 hsa-mir-18a | LUC7L3   | 0.30665529 mirna_pc  |
| 4365 hsa-mir-18a | ZCCHC9   | 0.305998447 mirna_pc |
| 4366 hsa-mir-18a | DDX1     | 0.346290254 mirna_pc |
| 4367 hsa-mir-18a | STX3     | 0.334694558 mirna_pc |
| 4368 hsa-mir-18a | AADAT    | 0.398799245 mirna_pc |
| 4369 hsa-mir-18a | ACP1     | 0.460063923 mirna_pc |
| 4370 hsa-mir-18a | C2orf43  | 0.37548386 mirna_pc  |
| 4371 hsa-mir-18a | GTF3A    | 0.415798928 mirna_pc |
| 4372 hsa-mir-18a | TMEM126B | 0.336606721 mirna_pc |
| 4373 hsa-mir-18a | SPRED2   | 0.336547147 mirna_pc |

|                   |           |                      |
|-------------------|-----------|----------------------|
| 4374 hsa-mir-18a  | TXLNG     | 0.31260711 mirna_pc  |
| 4375 hsa-mir-18a  | LOC80054  | 0.314377909 mirna_pc |
| 4376 hsa-mir-18a  | C2orf34   | 0.344642885 mirna_pc |
| 4377 hsa-mir-18a  | QPRT      | 0.33066784 mirna_pc  |
| 4378 hsa-mir-18a  | PRMT6     | 0.345307566 mirna_pc |
| 4379 hsa-mir-18a  | MRPS9     | 0.360783129 mirna_pc |
| 4380 hsa-mir-18a  | STRADB    | 0.346608186 mirna_pc |
| 4381 hsa-mir-18a  | TMED2     | 0.306211627 mirna_pc |
| 4382 hsa-mir-18a  | PNKD      | 0.307628756 mirna_pc |
| 4383 hsa-mir-18a  | ZNF530    | 0.354636132 mirna_pc |
| 4384 hsa-mir-18a  | ZNF765    | 0.323124786 mirna_pc |
| 4385 hsa-mir-18a  | PPIL4     | 0.303925363 mirna_pc |
| 4386 hsa-mir-18a  | HRSP12    | 0.351026318 mirna_pc |
| 4387 hsa-mir-18a  | VAPB      | 0.301681318 mirna_pc |
| 4388 hsa-mir-18a  | MIR17HG   | 0.549408883 mirna_pc |
| 4389 hsa-mir-18a  | AARSD1    | 0.324297516 mirna_pc |
| 4390 hsa-mir-18a  | ZNF239    | 0.443102707 mirna_pc |
| 4391 hsa-mir-18a  | ZNF202    | 0.303552367 mirna_pc |
| 4392 hsa-mir-18a  | TMEM14B   | 0.361077391 mirna_pc |
| 4393 hsa-mir-18a  | ZNF77     | 0.351744171 mirna_pc |
| 4394 hsa-mir-18a  | ZNF468    | 0.394107161 mirna_pc |
| 4395 hsa-mir-18a  | LOC151009 | 0.339078418 mirna_pc |
| 4396 hsa-mir-18a  | SLC37A4   | 0.368877885 mirna_pc |
| 4397 hsa-mir-18a  | CTNNBL1   | 0.337928344 mirna_pc |
| 4398 hsa-mir-18a  | MRPS31    | 0.34839398 mirna_pc  |
| 4399 hsa-mir-18a  | CENPV     | 0.471243952 mirna_pc |
| 4400 hsa-mir-18a  | DNMT3A    | 0.417045669 mirna_pc |
| 4401 hsa-mir-18a  | PRTFDC1   | 0.396579352 mirna_pc |
| 4402 hsa-mir-18a  | EIF5B     | 0.32175486 mirna_pc  |
| 4403 hsa-mir-18a  | ZNF670    | 0.333145052 mirna_pc |
| 4404 hsa-mir-18a  | GTF3C6    | 0.391033993 mirna_pc |
| 4405 hsa-mir-18a  | ZNF326    | 0.333949488 mirna_pc |
| 4406 hsa-mir-18a  | ZRANB2    | 0.307235246 mirna_pc |
| 4407 hsa-mir-18a  | DOM3Z     | 0.307982425 mirna_pc |
| 4408 hsa-mir-18a  | ARSE      | 0.302889118 mirna_pc |
| 4409 hsa-mir-301b | HOXC9     | 0.368835346 mirna_pc |
| 4410 hsa-mir-301b | RRM2      | 0.319835372 mirna_pc |
| 4411 hsa-mir-301b | UBE2C     | 0.338514385 mirna_pc |
| 4412 hsa-mir-301b | BUB1B     | 0.307425768 mirna_pc |
| 4413 hsa-mir-301b | KIF2C     | 0.335170449 mirna_pc |
| 4414 hsa-mir-301b | CCNA2     | 0.371518591 mirna_pc |
| 4415 hsa-mir-301b | MND1      | 0.41414207 mirna_pc  |
| 4416 hsa-mir-301b | KIF22     | 0.302814153 mirna_pc |
| 4417 hsa-mir-301b | NCAPH     | 0.312587162 mirna_pc |
| 4418 hsa-mir-301b | RAD54L    | 0.321280209 mirna_pc |
| 4419 hsa-mir-301b | CENPA     | 0.400278118 mirna_pc |
| 4420 hsa-mir-301b | MAD2L1    | 0.456971367 mirna_pc |
| 4421 hsa-mir-301b | LMNB1     | 0.306553872 mirna_pc |
| 4422 hsa-mir-301b | CDCA8     | 0.347493344 mirna_pc |
| 4423 hsa-mir-301b | TROAP     | 0.419579798 mirna_pc |
| 4424 hsa-mir-301b | STMN1     | 0.384025408 mirna_pc |
| 4425 hsa-mir-301b | DKC1      | 0.341989117 mirna_pc |
| 4426 hsa-mir-301b | CCNB2     | 0.336495004 mirna_pc |
| 4427 hsa-mir-301b | NUF2      | 0.38108297 mirna_pc  |

|      |              |           |             |          |
|------|--------------|-----------|-------------|----------|
| 4428 | hsa-mir-301b | PLK4      | 0.373023565 | mirna_pc |
| 4429 | hsa-mir-301b | HJURP     | 0.323805632 | mirna_pc |
| 4430 | hsa-mir-301b | PAICS     | 0.319181169 | mirna_pc |
| 4431 | hsa-mir-301b | BIRC5     | 0.418931947 | mirna_pc |
| 4432 | hsa-mir-301b | RCC1      | 0.332430812 | mirna_pc |
| 4433 | hsa-mir-301b | RECQL4    | 0.301004516 | mirna_pc |
| 4434 | hsa-mir-301b | AURKB     | 0.397632031 | mirna_pc |
| 4435 | hsa-mir-301b | KIF20A    | 0.31723587  | mirna_pc |
| 4436 | hsa-mir-301b | ACTL6A    | 0.430060001 | mirna_pc |
| 4437 | hsa-mir-301b | C12orf48  | 0.349838091 | mirna_pc |
| 4438 | hsa-mir-301b | HNRNPL    | 0.312927699 | mirna_pc |
| 4439 | hsa-mir-301b | SMC4      | 0.347865459 | mirna_pc |
| 4440 | hsa-mir-301b | C11orf82  | 0.448089264 | mirna_pc |
| 4441 | hsa-mir-301b | HNRNPC    | 0.308256764 | mirna_pc |
| 4442 | hsa-mir-301b | ILF2      | 0.325268743 | mirna_pc |
| 4443 | hsa-mir-301b | RNASEH2A  | 0.324104674 | mirna_pc |
| 4444 | hsa-mir-301b | EPR1      | 0.359535536 | mirna_pc |
| 4445 | hsa-mir-301b | SFRS2     | 0.322096883 | mirna_pc |
| 4446 | hsa-mir-301b | UCK2      | 0.414375598 | mirna_pc |
| 4447 | hsa-mir-301b | NFKBIL2   | 0.31670141  | mirna_pc |
| 4448 | hsa-mir-301b | SNRPG     | 0.368872209 | mirna_pc |
| 4449 | hsa-mir-301b | EIF4A3    | 0.302614575 | mirna_pc |
| 4450 | hsa-mir-301b | SNRPA     | 0.325980308 | mirna_pc |
| 4451 | hsa-mir-301b | FUS       | 0.315384047 | mirna_pc |
| 4452 | hsa-mir-301b | GINS4     | 0.390159962 | mirna_pc |
| 4453 | hsa-mir-301b | ANP32E    | 0.341210751 | mirna_pc |
| 4454 | hsa-mir-301b | CENPO     | 0.354592344 | mirna_pc |
| 4455 | hsa-mir-301b | HMGB2     | 0.38109693  | mirna_pc |
| 4456 | hsa-mir-301b | MLF1IP    | 0.301781558 | mirna_pc |
| 4457 | hsa-mir-301b | HIST1H2AE | 0.521540675 | mirna_pc |
| 4458 | hsa-mir-301b | PFDN2     | 0.324241665 | mirna_pc |
| 4459 | hsa-mir-301b | HNRNPR    | 0.384532404 | mirna_pc |
| 4460 | hsa-mir-301b | DLEU2     | 0.333721003 | mirna_pc |
| 4461 | hsa-mir-301b | ACYP1     | 0.377614375 | mirna_pc |
| 4462 | hsa-mir-301b | MSH2      | 0.388036177 | mirna_pc |
| 4463 | hsa-mir-301b | DBF4      | 0.494733759 | mirna_pc |
| 4464 | hsa-mir-301b | CDC7      | 0.40338648  | mirna_pc |
| 4465 | hsa-mir-301b | YDJC      | 0.40058626  | mirna_pc |
| 4466 | hsa-mir-301b | RFC4      | 0.412928745 | mirna_pc |
| 4467 | hsa-mir-301b | FBX05     | 0.321136857 | mirna_pc |
| 4468 | hsa-mir-301b | FIGNL1    | 0.427723371 | mirna_pc |
| 4469 | hsa-mir-301b | SF3B14    | 0.322029898 | mirna_pc |
| 4470 | hsa-mir-301b | RAD54B    | 0.309992224 | mirna_pc |
| 4471 | hsa-mir-301b | MAGOH     | 0.333561837 | mirna_pc |
| 4472 | hsa-mir-301b | DDX12     | 0.33570956  | mirna_pc |
| 4473 | hsa-mir-301b | CPSF3     | 0.494713385 | mirna_pc |
| 4474 | hsa-mir-301b | BANF1     | 0.409885657 | mirna_pc |
| 4475 | hsa-mir-301b | C21orf45  | 0.396777472 | mirna_pc |
| 4476 | hsa-mir-301b | PPM1G     | 0.391273416 | mirna_pc |
| 4477 | hsa-mir-301b | DNAJB11   | 0.319010348 | mirna_pc |
| 4478 | hsa-mir-301b | ACAD8     | 0.436412653 | mirna_pc |
| 4479 | hsa-mir-301b | TFAP4     | 0.309647719 | mirna_pc |
| 4480 | hsa-mir-301b | NUDT5     | 0.316397224 | mirna_pc |
| 4481 | hsa-mir-301b | DAZAP1    | 0.376306664 | mirna_pc |

|                   |              |                      |
|-------------------|--------------|----------------------|
| 4482 hsa-mir-301b | CBX8         | 0.444706319 mirna_pc |
| 4483 hsa-mir-301b | TMEM201      | 0.330483865 mirna_pc |
| 4484 hsa-mir-301b | PAFAH1B3     | 0.364494565 mirna_pc |
| 4485 hsa-mir-301b | PSRC1        | 0.376989104 mirna_pc |
| 4486 hsa-mir-301b | DGUOK        | 0.46606401 mirna_pc  |
| 4487 hsa-mir-301b | MRPL47       | 0.380817142 mirna_pc |
| 4488 hsa-mir-301b | HNRNPM       | 0.354877125 mirna_pc |
| 4489 hsa-mir-301b | CCT6A        | 0.442829775 mirna_pc |
| 4490 hsa-mir-301b | POLR2H       | 0.370675386 mirna_pc |
| 4491 hsa-mir-301b | SSBP3        | 0.409145402 mirna_pc |
| 4492 hsa-mir-301b | SHFM1        | 0.490777071 mirna_pc |
| 4493 hsa-mir-301b | LSG1         | 0.414417047 mirna_pc |
| 4494 hsa-mir-301b | GABPB1       | 0.30422433 mirna_pc  |
| 4495 hsa-mir-301b | PPIH         | 0.373437555 mirna_pc |
| 4496 hsa-mir-301b | LOC100128191 | 0.361153622 mirna_pc |
| 4497 hsa-mir-301b | SMYD5        | 0.353465821 mirna_pc |
| 4498 hsa-mir-301b | SF3A2        | 0.337882741 mirna_pc |
| 4499 hsa-mir-301b | TSSC1        | 0.387395254 mirna_pc |
| 4500 hsa-mir-301b | SNRPF        | 0.345558776 mirna_pc |
| 4501 hsa-mir-301b | SUMO2        | 0.453368492 mirna_pc |
| 4502 hsa-mir-301b | WDR43        | 0.32365548 mirna_pc  |
| 4503 hsa-mir-301b | SNRPA1       | 0.424419246 mirna_pc |
| 4504 hsa-mir-301b | SMC6         | 0.362358951 mirna_pc |
| 4505 hsa-mir-301b | UBE2I        | 0.30088753 mirna_pc  |
| 4506 hsa-mir-301b | TIPIN        | 0.368090704 mirna_pc |
| 4507 hsa-mir-301b | ECE2         | 0.371263517 mirna_pc |
| 4508 hsa-mir-301b | PA2G4        | 0.312217872 mirna_pc |
| 4509 hsa-mir-301b | SNRPD3       | 0.460197208 mirna_pc |
| 4510 hsa-mir-301b | KHDRBS1      | 0.3411315 mirna_pc   |
| 4511 hsa-mir-301b | SPAST        | 0.412961078 mirna_pc |
| 4512 hsa-mir-301b | MTL 5.00     | 0.378158596 mirna_pc |
| 4513 hsa-mir-301b | PRRT1        | 0.32791521 mirna_pc  |
| 4514 hsa-mir-301b | GNL2         | 0.477317884 mirna_pc |
| 4515 hsa-mir-301b | NASP         | 0.368633028 mirna_pc |
| 4516 hsa-mir-301b | PTMA         | 0.418036872 mirna_pc |
| 4517 hsa-mir-301b | USP39        | 0.302340213 mirna_pc |
| 4518 hsa-mir-301b | AMZ2P1       | 0.317373231 mirna_pc |
| 4519 hsa-mir-301b | C11orf84     | 0.36367922 mirna_pc  |
| 4520 hsa-mir-301b | CLCN2        | 0.30633299 mirna_pc  |
| 4521 hsa-mir-301b | LRRC8D       | 0.351804201 mirna_pc |
| 4522 hsa-mir-301b | NCBP2        | 0.386481464 mirna_pc |
| 4523 hsa-mir-301b | FBX0220S     | 0.388375401 mirna_pc |
| 4524 hsa-mir-301b | NAALADL2     | 0.456879746 mirna_pc |
| 4525 hsa-mir-301b | HNRNPD       | 0.43288702 mirna_pc  |
| 4526 hsa-mir-301b | DPY30        | 0.435523703 mirna_pc |
| 4527 hsa-mir-301b | MTHFD2       | 0.312874912 mirna_pc |
| 4528 hsa-mir-301b | CCT4         | 0.313774519 mirna_pc |
| 4529 hsa-mir-301b | RAD9A        | 0.329871246 mirna_pc |
| 4530 hsa-mir-301b | NCAPD3       | 0.503000058 mirna_pc |
| 4531 hsa-mir-301b | TBC1D7       | 0.313360142 mirna_pc |
| 4532 hsa-mir-301b | PAK1IP1      | 0.33579287 mirna_pc  |
| 4533 hsa-mir-301b | YWHAE        | 0.346566981 mirna_pc |
| 4534 hsa-mir-301b | HSD17B12     | 0.339176501 mirna_pc |
| 4535 hsa-mir-301b | C3orf57      | 0.504086362 mirna_pc |



|      |              |           |             |          |
|------|--------------|-----------|-------------|----------|
| 4536 | hsa-mir-301b | RNF214    | 0.348512632 | mirna_pc |
| 4537 | hsa-mir-301b | EHMT2     | 0.308249859 | mirna_pc |
| 4538 | hsa-mir-301b | PPT1      | 0.300962212 | mirna_pc |
| 4539 | hsa-mir-301b | DEK       | 0.312779972 | mirna_pc |
| 4540 | hsa-mir-301b | PASK      | 0.316697452 | mirna_pc |
| 4541 | hsa-mir-301b | KHSRP     | 0.394656779 | mirna_pc |
| 4542 | hsa-mir-301b | LSM 6.00  | 0.301681568 | mirna_pc |
| 4543 | hsa-mir-301b | PRAME     | 0.440065858 | mirna_pc |
| 4544 | hsa-mir-301b | MRPS17    | 0.479918453 | mirna_pc |
| 4545 | hsa-mir-301b | TNFRSF18  | 0.376233422 | mirna_pc |
| 4546 | hsa-mir-301b | B3GALNT1  | 0.332343219 | mirna_pc |
| 4547 | hsa-mir-301b | VPS26B    | 0.321577501 | mirna_pc |
| 4548 | hsa-mir-301b | TRA2B     | 0.33996474  | mirna_pc |
| 4549 | hsa-mir-301b | RSRC1     | 0.397858852 | mirna_pc |
| 4550 | hsa-mir-301b | GAR1      | 0.359761671 | mirna_pc |
| 4551 | hsa-mir-301b | C15orf23  | 0.307467202 | mirna_pc |
| 4552 | hsa-mir-301b | PRMT3     | 0.328963921 | mirna_pc |
| 4553 | hsa-mir-301b | C3orf21   | 0.319825725 | mirna_pc |
| 4554 | hsa-mir-301b | PSMD12    | 0.390992366 | mirna_pc |
| 4555 | hsa-mir-301b | ZNF879    | 0.301833565 | mirna_pc |
| 4556 | hsa-mir-301b | ITGB3BP   | 0.315682544 | mirna_pc |
| 4557 | hsa-mir-301b | ENOPH1    | 0.449148385 | mirna_pc |
| 4558 | hsa-mir-301b | DDX55     | 0.303062554 | mirna_pc |
| 4559 | hsa-mir-301b | PLEKHG4   | 0.396062923 | mirna_pc |
| 4560 | hsa-mir-301b | SFPQ      | 0.342076832 | mirna_pc |
| 4561 | hsa-mir-301b | AP3M2     | 0.305351474 | mirna_pc |
| 4562 | hsa-mir-301b | EIF4EBP1  | 0.502362716 | mirna_pc |
| 4563 | hsa-mir-301b | TTC17     | 0.389216663 | mirna_pc |
| 4564 | hsa-mir-301b | CADM1     | 0.499739758 | mirna_pc |
| 4565 | hsa-mir-301b | HDAC2     | 0.365345455 | mirna_pc |
| 4566 | hsa-mir-301b | PDAP1     | 0.621376812 | mirna_pc |
| 4567 | hsa-mir-301b | RNF7      | 0.449920851 | mirna_pc |
| 4568 | hsa-mir-301b | GEMIN6    | 0.412428436 | mirna_pc |
| 4569 | hsa-mir-301b | PTCD1     | 0.616115801 | mirna_pc |
| 4570 | hsa-mir-301b | CRIP1     | 0.343961675 | mirna_pc |
| 4571 | hsa-mir-301b | MSH6      | 0.38707863  | mirna_pc |
| 4572 | hsa-mir-301b | SOX4      | 0.385257133 | mirna_pc |
| 4573 | hsa-mir-301b | C3orf34   | 0.429888832 | mirna_pc |
| 4574 | hsa-mir-301b | TPRKB     | 0.444195131 | mirna_pc |
| 4575 | hsa-mir-301b | LEF1      | 0.358139736 | mirna_pc |
| 4576 | hsa-mir-301b | POLB      | 0.427388456 | mirna_pc |
| 4577 | hsa-mir-301b | HNRNPA1   | 0.308362658 | mirna_pc |
| 4578 | hsa-mir-301b | PPP1R8    | 0.359932308 | mirna_pc |
| 4579 | hsa-mir-301b | CDK2AP1   | 0.319956346 | mirna_pc |
| 4580 | hsa-mir-301b | NUDT3     | 0.516767029 | mirna_pc |
| 4581 | hsa-mir-301b | MEX3A     | 0.401726487 | mirna_pc |
| 4582 | hsa-mir-301b | ATP5J2    | 0.597067396 | mirna_pc |
| 4583 | hsa-mir-301b | IRAK1BP1  | 0.361146973 | mirna_pc |
| 4584 | hsa-mir-301b | BUD31     | 0.539840214 | mirna_pc |
| 4585 | hsa-mir-301b | C16orf88  | 0.337848634 | mirna_pc |
| 4586 | hsa-mir-301b | APEX1     | 0.320486042 | mirna_pc |
| 4587 | hsa-mir-301b | HNRNPA1L2 | 0.351374024 | mirna_pc |
| 4588 | hsa-mir-301b | EMILIN3   | 0.415017174 | mirna_pc |
| 4589 | hsa-mir-301b | PADI3     | 0.328235144 | mirna_pc |

|                   |           |                      |
|-------------------|-----------|----------------------|
| 4590 hsa-mir-301b | ZBTB12    | 0.303572904 mirna_pc |
| 4591 hsa-mir-301b | LOC642846 | 0.305847943 mirna_pc |
| 4592 hsa-mir-301b | RCN2      | 0.324843016 mirna_pc |
| 4593 hsa-mir-301b | THUMPD2   | 0.395941612 mirna_pc |
| 4594 hsa-mir-301b | NOL10     | 0.409478019 mirna_pc |
| 4595 hsa-mir-301b | SF3A3     | 0.403074144 mirna_pc |
| 4596 hsa-mir-301b | EPHA7     | 0.305953104 mirna_pc |
| 4597 hsa-mir-301b | MUTYH     | 0.411499902 mirna_pc |
| 4598 hsa-mir-301b | TAF1B     | 0.487819017 mirna_pc |
| 4599 hsa-mir-301b | XRCC6BP1  | 0.392875879 mirna_pc |
| 4600 hsa-mir-301b | RPP21     | 0.304936227 mirna_pc |
| 4601 hsa-mir-301b | VRK1      | 0.336793985 mirna_pc |
| 4602 hsa-mir-301b | EXOSC9    | 0.449577592 mirna_pc |
| 4603 hsa-mir-301b | ALKBH2    | 0.418422427 mirna_pc |
| 4604 hsa-mir-301b | ZNF642    | 0.347838658 mirna_pc |
| 4605 hsa-mir-301b | RPF2      | 0.320789582 mirna_pc |
| 4606 hsa-mir-301b | SCARNA7   | 0.309916292 mirna_pc |
| 4607 hsa-mir-301b | NHLRC1    | 0.308553438 mirna_pc |
| 4608 hsa-mir-301b | CCDC24    | 0.389575718 mirna_pc |
| 4609 hsa-mir-301b | RPL39L    | 0.301292474 mirna_pc |
| 4610 hsa-mir-301b | TAF1D     | 0.308617371 mirna_pc |
| 4611 hsa-mir-301b | GPN3      | 0.321394915 mirna_pc |
| 4612 hsa-mir-301b | ASB3      | 0.302018972 mirna_pc |
| 4613 hsa-mir-301b | MEMO1     | 0.476856955 mirna_pc |
| 4614 hsa-mir-301b | CCDC23    | 0.303708918 mirna_pc |
| 4615 hsa-mir-301b | IGSF9     | 0.316201499 mirna_pc |
| 4616 hsa-mir-301b | UBXN2A    | 0.35942734 mirna_pc  |
| 4617 hsa-mir-301b | FIP1L1    | 0.338656325 mirna_pc |
| 4618 hsa-mir-301b | SCLT1     | 0.305287421 mirna_pc |
| 4619 hsa-mir-301b | MAGEF1    | 0.453070532 mirna_pc |
| 4620 hsa-mir-301b | YRDC      | 0.36702076 mirna_pc  |
| 4621 hsa-mir-301b | SMARCB1   | 0.382072178 mirna_pc |
| 4622 hsa-mir-301b | TTC32     | 0.518417425 mirna_pc |
| 4623 hsa-mir-301b | SMN2      | 0.3227385 mirna_pc   |
| 4624 hsa-mir-301b | U2AF1     | 0.371799306 mirna_pc |
| 4625 hsa-mir-301b | ZNF639    | 0.339956029 mirna_pc |
| 4626 hsa-mir-301b | ITPRIPL1  | 0.354028293 mirna_pc |
| 4627 hsa-mir-301b | RBM17     | 0.355113545 mirna_pc |
| 4628 hsa-mir-301b | ABT1      | 0.446734393 mirna_pc |
| 4629 hsa-mir-301b | ZNF643    | 0.363043228 mirna_pc |
| 4630 hsa-mir-301b | MPHOSPH10 | 0.394429658 mirna_pc |
| 4631 hsa-mir-301b | AKAP9     | 0.583545611 mirna_pc |
| 4632 hsa-mir-301b | RPS7      | 0.330223457 mirna_pc |
| 4633 hsa-mir-301b | PABPN1    | 0.382083328 mirna_pc |
| 4634 hsa-mir-301b | BCL7A     | 0.32501627 mirna_pc  |
| 4635 hsa-mir-301b | WNT10A    | 0.32157819 mirna_pc  |
| 4636 hsa-mir-301b | TIMM16    | 0.310190083 mirna_pc |
| 4637 hsa-mir-301b | C7orf44   | 0.339285131 mirna_pc |
| 4638 hsa-mir-301b | TRPA1     | 0.314159807 mirna_pc |
| 4639 hsa-mir-301b | NUDCD2    | 0.328427557 mirna_pc |
| 4640 hsa-mir-301b | NAT9      | 0.31959967 mirna_pc  |
| 4641 hsa-mir-301b | ZNF286A   | 0.307895115 mirna_pc |
| 4642 hsa-mir-301b | WDR77     | 0.345165991 mirna_pc |
| 4643 hsa-mir-301b | MRPL21    | 0.429388951 mirna_pc |

|                   |            |                      |
|-------------------|------------|----------------------|
| 4644 hsa-mir-301b | TCEA1      | 0.308565226 mirna_pc |
| 4645 hsa-mir-301b | NLE1       | 0.33312186 mirna_pc  |
| 4646 hsa-mir-301b | FXR1       | 0.310518133 mirna_pc |
| 4647 hsa-mir-301b | DMRTA2     | 0.420601179 mirna_pc |
| 4648 hsa-mir-301b | UPF3B      | 0.323440163 mirna_pc |
| 4649 hsa-mir-301b | BTG3       | 0.313650849 mirna_pc |
| 4650 hsa-mir-301b | LOC645332  | 0.418468922 mirna_pc |
| 4651 hsa-mir-301b | PSPH       | 0.357070971 mirna_pc |
| 4652 hsa-mir-301b | PRSS21     | 0.310724272 mirna_pc |
| 4653 hsa-mir-301b | MGC72080   | 0.567331783 mirna_pc |
| 4654 hsa-mir-301b | TRRAP      | 0.436395356 mirna_pc |
| 4655 hsa-mir-301b | TRMT61B    | 0.330310818 mirna_pc |
| 4656 hsa-mir-301b | RWDD3      | 0.300662801 mirna_pc |
| 4657 hsa-mir-301b | SEMA4F     | 0.340664909 mirna_pc |
| 4658 hsa-mir-301b | RDH14      | 0.360495955 mirna_pc |
| 4659 hsa-mir-301b | MPV17      | 0.359456321 mirna_pc |
| 4660 hsa-mir-301b | DDX20      | 0.336879943 mirna_pc |
| 4661 hsa-mir-301b | Clorf109   | 0.404659627 mirna_pc |
| 4662 hsa-mir-301b | PCBP1      | 0.337014975 mirna_pc |
| 4663 hsa-mir-301b | CHCHD2     | 0.438995408 mirna_pc |
| 4664 hsa-mir-301b | PIGX       | 0.423651922 mirna_pc |
| 4665 hsa-mir-301b | MTA1       | 0.306142502 mirna_pc |
| 4666 hsa-mir-301b | EIF4A2     | 0.330031814 mirna_pc |
| 4667 hsa-mir-301b | HTRA2      | 0.403357476 mirna_pc |
| 4668 hsa-mir-301b | MTA3       | 0.312065739 mirna_pc |
| 4669 hsa-mir-301b | CHAC2      | 0.351743698 mirna_pc |
| 4670 hsa-mir-301b | ACN9       | 0.494169483 mirna_pc |
| 4671 hsa-mir-301b | INTU       | 0.557898095 mirna_pc |
| 4672 hsa-mir-301b | ATP6V1E2   | 0.371389976 mirna_pc |
| 4673 hsa-mir-301b | E2F6       | 0.377869258 mirna_pc |
| 4674 hsa-mir-301b | DRG1       | 0.310008364 mirna_pc |
| 4675 hsa-mir-301b | NOL7       | 0.377976957 mirna_pc |
| 4676 hsa-mir-301b | CPSF4      | 0.63470798 mirna_pc  |
| 4677 hsa-mir-301b | SFRS13A    | 0.353045078 mirna_pc |
| 4678 hsa-mir-301b | GADD45GIP1 | 0.327364015 mirna_pc |
| 4679 hsa-mir-301b | SCLY       | 0.390195877 mirna_pc |
| 4680 hsa-mir-301b | NT5C       | 0.429369596 mirna_pc |
| 4681 hsa-mir-301b | STAMBP     | 0.374973987 mirna_pc |
| 4682 hsa-mir-301b | CCDC59     | 0.328888096 mirna_pc |
| 4683 hsa-mir-301b | SLC4A1AP   | 0.435702369 mirna_pc |
| 4684 hsa-mir-301b | TTC27      | 0.415592213 mirna_pc |
| 4685 hsa-mir-301b | DHRS13     | 0.300400038 mirna_pc |
| 4686 hsa-mir-301b | RPF1       | 0.338945403 mirna_pc |
| 4687 hsa-mir-301b | MTIF2      | 0.386774374 mirna_pc |
| 4688 hsa-mir-301b | CDK2AP2    | 0.321857423 mirna_pc |
| 4689 hsa-mir-301b | KRTCAP3    | 0.304941068 mirna_pc |
| 4690 hsa-mir-301b | LOC222699  | 0.378895833 mirna_pc |
| 4691 hsa-mir-301b | KCNMB3     | 0.334083202 mirna_pc |
| 4692 hsa-mir-301b | DHX57      | 0.388034278 mirna_pc |
| 4693 hsa-mir-301b | HIST1H1C   | 0.455314048 mirna_pc |
| 4694 hsa-mir-301b | ALX3       | 0.338224942 mirna_pc |
| 4695 hsa-mir-301b | AAAS       | 0.399616091 mirna_pc |
| 4696 hsa-mir-301b | C19orf54   | 0.339222241 mirna_pc |
| 4697 hsa-mir-301b | SUPT7L     | 0.316349758 mirna_pc |

|                   |              |                      |
|-------------------|--------------|----------------------|
| 4698 hsa-mir-301b | LIG3         | 0.335917781 mirna_pc |
| 4699 hsa-mir-301b | ZNF277       | 0.515051816 mirna_pc |
| 4700 hsa-mir-301b | PELP1        | 0.318060153 mirna_pc |
| 4701 hsa-mir-301b | THOC1        | 0.330319766 mirna_pc |
| 4702 hsa-mir-301b | C11orf45     | 0.457240184 mirna_pc |
| 4703 hsa-mir-301b | SFRS7        | 0.401705574 mirna_pc |
| 4704 hsa-mir-301b | IFRD1        | 0.514530733 mirna_pc |
| 4705 hsa-mir-301b | INO80B       | 0.378638828 mirna_pc |
| 4706 hsa-mir-301b | LOC100128292 | 0.316889094 mirna_pc |
| 4707 hsa-mir-301b | COR01B       | 0.415844369 mirna_pc |
| 4708 hsa-mir-301b | ANKIB1       | 0.341554511 mirna_pc |
| 4709 hsa-mir-301b | THYN1        | 0.557053033 mirna_pc |
| 4710 hsa-mir-301b | PARL         | 0.356960537 mirna_pc |
| 4711 hsa-mir-301b | C2orf68      | 0.387253575 mirna_pc |
| 4712 hsa-mir-301b | ARPC1A       | 0.35938112 mirna_pc  |
| 4713 hsa-mir-301b | KCNG1        | 0.333756383 mirna_pc |
| 4714 hsa-mir-301b | APLP2        | 0.455337868 mirna_pc |
| 4715 hsa-mir-301b | C17orf75     | 0.430052544 mirna_pc |
| 4716 hsa-mir-301b | RPL35A       | 0.307261403 mirna_pc |
| 4717 hsa-mir-301b | ZBTB44       | 0.46426805 mirna_pc  |
| 4718 hsa-mir-301b | NUDT14       | 0.315277979 mirna_pc |
| 4719 hsa-mir-301b | EXT2         | 0.339623786 mirna_pc |
| 4720 hsa-mir-301b | ZNF789       | 0.432629433 mirna_pc |
| 4721 hsa-mir-301b | ZNF771       | 0.326488255 mirna_pc |
| 4722 hsa-mir-301b | EEF1E1       | 0.31002643 mirna_pc  |
| 4723 hsa-mir-301b | MRPL38       | 0.353314232 mirna_pc |
| 4724 hsa-mir-301b | ATPBD4       | 0.372040097 mirna_pc |
| 4725 hsa-mir-301b | GDF11        | 0.331400071 mirna_pc |
| 4726 hsa-mir-301b | ZKSCAN5      | 0.50613084 mirna_pc  |
| 4727 hsa-mir-301b | POLR2C       | 0.382593155 mirna_pc |
| 4728 hsa-mir-301b | C12orf10     | 0.351320458 mirna_pc |
| 4729 hsa-mir-301b | PPP1R2       | 0.310545154 mirna_pc |
| 4730 hsa-mir-301b | CLEC2B       | 0.397513237 mirna_pc |
| 4731 hsa-mir-301b | C12orf45     | 0.386060709 mirna_pc |
| 4732 hsa-mir-301b | C2orf44      | 0.302730408 mirna_pc |
| 4733 hsa-mir-301b | RING1        | 0.33305914 mirna_pc  |
| 4734 hsa-mir-301b | SEPHS1       | 0.349789193 mirna_pc |
| 4735 hsa-mir-301b | SUMF2        | 0.419433626 mirna_pc |
| 4736 hsa-mir-301b | RPS19BP1     | 0.38151905 mirna_pc  |
| 4737 hsa-mir-301b | KDM4D        | 0.303423054 mirna_pc |
| 4738 hsa-mir-301b | GBAS         | 0.480099309 mirna_pc |
| 4739 hsa-mir-301b | C8orf40      | 0.437813749 mirna_pc |
| 4740 hsa-mir-301b | AGBL5        | 0.312270765 mirna_pc |
| 4741 hsa-mir-301b | AIP          | 0.408680481 mirna_pc |
| 4742 hsa-mir-301b | BOLA3        | 0.374837048 mirna_pc |
| 4743 hsa-mir-301b | C19orf23     | 0.535871957 mirna_pc |
| 4744 hsa-mir-301b | MYL6B        | 0.304520043 mirna_pc |
| 4745 hsa-mir-301b | PDCD7        | 0.331421654 mirna_pc |
| 4746 hsa-mir-301b | C11orf71     | 0.373116245 mirna_pc |
| 4747 hsa-mir-301b | POLR2F       | 0.318907044 mirna_pc |
| 4748 hsa-mir-301b | ALKBH3       | 0.369145238 mirna_pc |
| 4749 hsa-mir-301b | CD200        | 0.308893166 mirna_pc |
| 4750 hsa-mir-301b | MRPS15       | 0.363088779 mirna_pc |
| 4751 hsa-mir-301b | C17orf58     | 0.443672532 mirna_pc |

|                   |          |                      |
|-------------------|----------|----------------------|
| 4752 hsa-mir-301b | NARS2    | 0.476475238 mirna_pc |
| 4753 hsa-mir-301b | LYRM4    | 0.403404411 mirna_pc |
| 4754 hsa-mir-301b | FAM133B  | 0.575150039 mirna_pc |
| 4755 hsa-mir-301b | BCL11A   | 0.327318793 mirna_pc |
| 4756 hsa-mir-301b | BSG      | 0.348153031 mirna_pc |
| 4757 hsa-mir-301b | UTP11L   | 0.360558011 mirna_pc |
| 4758 hsa-mir-301b | TIMM8B   | 0.309064567 mirna_pc |
| 4759 hsa-mir-301b | ALMS1    | 0.306435159 mirna_pc |
| 4760 hsa-mir-301b | ANP32A   | 0.357711752 mirna_pc |
| 4761 hsa-mir-301b | SPDYA    | 0.3295876 mirna_pc   |
| 4762 hsa-mir-301b | RBM25    | 0.310327333 mirna_pc |
| 4763 hsa-mir-301b | ETAA1    | 0.319027858 mirna_pc |
| 4764 hsa-mir-301b | HYLS1    | 0.37014883 mirna_pc  |
| 4765 hsa-mir-301b | C7orf60  | 0.397427081 mirna_pc |
| 4766 hsa-mir-301b | LCMT2    | 0.309140226 mirna_pc |
| 4767 hsa-mir-301b | ZNF300   | 0.385483002 mirna_pc |
| 4768 hsa-mir-301b | MORN2    | 0.415293023 mirna_pc |
| 4769 hsa-mir-301b | SETD6    | 0.368341801 mirna_pc |
| 4770 hsa-mir-301b | RTN4RL1  | 0.417132768 mirna_pc |
| 4771 hsa-mir-301b | C15orf40 | 0.391071161 mirna_pc |
| 4772 hsa-mir-301b | CWC15    | 0.392334929 mirna_pc |
| 4773 hsa-mir-301b | MYCN     | 0.310855118 mirna_pc |
| 4774 hsa-mir-301b | MTERF    | 0.643230735 mirna_pc |
| 4775 hsa-mir-301b | SBK1     | 0.459197237 mirna_pc |
| 4776 hsa-mir-301b | AFMID    | 0.377628266 mirna_pc |
| 4777 hsa-mir-301b | C7orf64  | 0.436697606 mirna_pc |
| 4778 hsa-mir-301b | GLS2     | 0.319222779 mirna_pc |
| 4779 hsa-mir-301b | SLC25A33 | 0.394317962 mirna_pc |
| 4780 hsa-mir-301b | CDKAL1   | 0.308812264 mirna_pc |
| 4781 hsa-mir-301b | OST4     | 0.325305372 mirna_pc |
| 4782 hsa-mir-301b | TMEM18   | 0.36990793 mirna_pc  |
| 4783 hsa-mir-301b | ZNF394   | 0.432581935 mirna_pc |
| 4784 hsa-mir-301b | PAQR6    | 0.357906881 mirna_pc |
| 4785 hsa-mir-301b | DDX51    | 0.327209841 mirna_pc |
| 4786 hsa-mir-301b | GTF2H2   | 0.373787948 mirna_pc |
| 4787 hsa-mir-301b | ZNF232   | 0.355538192 mirna_pc |
| 4788 hsa-mir-301b | ZBTB39   | 0.373601111 mirna_pc |
| 4789 hsa-mir-301b | SNRNP27  | 0.359132077 mirna_pc |
| 4790 hsa-mir-301b | C1orf56  | 0.31666526 mirna_pc  |
| 4791 hsa-mir-301b | ENO3     | 0.304865419 mirna_pc |
| 4792 hsa-mir-301b | RPAIN    | 0.381008249 mirna_pc |
| 4793 hsa-mir-301b | CCDC90B  | 0.528161084 mirna_pc |
| 4794 hsa-mir-301b | VPS54    | 0.332957409 mirna_pc |
| 4795 hsa-mir-301b | MRPL1    | 0.338501542 mirna_pc |
| 4796 hsa-mir-301b | API5     | 0.484928319 mirna_pc |
| 4797 hsa-mir-301b | USP28    | 0.384549512 mirna_pc |
| 4798 hsa-mir-301b | C2orf3   | 0.502451449 mirna_pc |
| 4799 hsa-mir-301b | KRIT1    | 0.496113628 mirna_pc |
| 4800 hsa-mir-301b | DHRS2    | 0.434180725 mirna_pc |
| 4801 hsa-mir-301b | MEAF6    | 0.426536885 mirna_pc |
| 4802 hsa-mir-301b | FGFBP3   | 0.371210701 mirna_pc |
| 4803 hsa-mir-301b | DNAJC19  | 0.315782987 mirna_pc |
| 4804 hsa-mir-301b | TMEM134  | 0.463319753 mirna_pc |
| 4805 hsa-mir-301b | CCDC157  | 0.313172359 mirna_pc |

|                   |           |                      |
|-------------------|-----------|----------------------|
| 4806 hsa-mir-301b | ZNF354A   | 0.310340365 mirna_pc |
| 4807 hsa-mir-301b | PEX1      | 0.460995712 mirna_pc |
| 4808 hsa-mir-301b | NDUFS5    | 0.325415603 mirna_pc |
| 4809 hsa-mir-301b | MRPL19    | 0.390604328 mirna_pc |
| 4810 hsa-mir-301b | C11orf35  | 0.380636592 mirna_pc |
| 4811 hsa-mir-301b | CETN3     | 0.380487409 mirna_pc |
| 4812 hsa-mir-301b | ETV5      | 0.395298992 mirna_pc |
| 4813 hsa-mir-301b | LSM 1.00  | 0.402878747 mirna_pc |
| 4814 hsa-mir-301b | DYNC1I1   | 0.538831719 mirna_pc |
| 4815 hsa-mir-301b | GLI4      | 0.379071971 mirna_pc |
| 4816 hsa-mir-301b | AADAT     | 0.360212566 mirna_pc |
| 4817 hsa-mir-301b | NFRKB     | 0.318620973 mirna_pc |
| 4818 hsa-mir-301b | IGHMBP2   | 0.334086915 mirna_pc |
| 4819 hsa-mir-301b | ACPI      | 0.354031339 mirna_pc |
| 4820 hsa-mir-301b | FDX1L     | 0.316493902 mirna_pc |
| 4821 hsa-mir-301b | GATAD1    | 0.363257182 mirna_pc |
| 4822 hsa-mir-301b | ZNF322A   | 0.615922634 mirna_pc |
| 4823 hsa-mir-301b | SPRED2    | 0.344027417 mirna_pc |
| 4824 hsa-mir-301b | GLRX5     | 0.348249244 mirna_pc |
| 4825 hsa-mir-301b | SERF1A    | 0.425267259 mirna_pc |
| 4826 hsa-mir-301b | LOC728640 | 0.438768143 mirna_pc |
| 4827 hsa-mir-301b | PRMT6     | 0.305200341 mirna_pc |
| 4828 hsa-mir-301b | LOC401397 | 0.611346859 mirna_pc |
| 4829 hsa-mir-301b | C21orf119 | 0.354429221 mirna_pc |
| 4830 hsa-mir-301b | C2orf28   | 0.430420092 mirna_pc |
| 4831 hsa-mir-301b | HIRIP3    | 0.346710052 mirna_pc |
| 4832 hsa-mir-301b | TMEM168   | 0.578220826 mirna_pc |
| 4833 hsa-mir-301b | SCHIP1    | 0.310571797 mirna_pc |
| 4834 hsa-mir-301b | CCDC75    | 0.437834627 mirna_pc |
| 4835 hsa-mir-301b | MRPL53    | 0.47012392 mirna_pc  |
| 4836 hsa-mir-301b | PPCDC     | 0.332842335 mirna_pc |
| 4837 hsa-mir-301b | DNMT3A    | 0.436734549 mirna_pc |
| 4838 hsa-mir-301b | ANKRD49   | 0.331444552 mirna_pc |
| 4839 hsa-mir-301b | NDUFS8    | 0.472469382 mirna_pc |
| 4840 hsa-mir-301b | ACCN2     | 0.300993988 mirna_pc |
| 4841 hsa-mir-301b | C15orf61  | 0.391231478 mirna_pc |
| 4842 hsa-mir-301b | ZNF326    | 0.365086391 mirna_pc |
| 4843 hsa-mir-361  | KIF4B     | 0.361195125 mirna_pc |
| 4844 hsa-mir-361  | HOXC9     | 0.359387358 mirna_pc |
| 4845 hsa-mir-361  | FANCA     | 0.336438963 mirna_pc |
| 4846 hsa-mir-361  | SGOL1     | 0.350510646 mirna_pc |
| 4847 hsa-mir-361  | MND1      | 0.311853034 mirna_pc |
| 4848 hsa-mir-361  | RAD54L    | 0.302788386 mirna_pc |
| 4849 hsa-mir-361  | MAD2L1    | 0.311715924 mirna_pc |
| 4850 hsa-mir-361  | TIMELESS  | 0.329106276 mirna_pc |
| 4851 hsa-mir-361  | XPO1      | 0.30417402 mirna_pc  |
| 4852 hsa-mir-361  | DKC1      | 0.308840048 mirna_pc |
| 4853 hsa-mir-361  | KIF4A     | 0.361849889 mirna_pc |
| 4854 hsa-mir-361  | PLK4      | 0.355001617 mirna_pc |
| 4855 hsa-mir-361  | FANCB     | 0.327029788 mirna_pc |
| 4856 hsa-mir-361  | LIG1      | 0.320531077 mirna_pc |
| 4857 hsa-mir-361  | OIP5      | 0.305395138 mirna_pc |
| 4858 hsa-mir-361  | C1orf112  | 0.359998143 mirna_pc |
| 4859 hsa-mir-361  | FEN1      | 0.303198915 mirna_pc |

|                  |              |                      |
|------------------|--------------|----------------------|
| 4860 hsa-mir-361 | HNRNPL       | 0.310128891 mirna_pc |
| 4861 hsa-mir-361 | ZWINT        | 0.359869236 mirna_pc |
| 4862 hsa-mir-361 | C15orf42     | 0.334031329 mirna_pc |
| 4863 hsa-mir-361 | DEPDC1B      | 0.322561444 mirna_pc |
| 4864 hsa-mir-361 | CENPO        | 0.32480399 mirna_pc  |
| 4865 hsa-mir-361 | HMGB2        | 0.385636296 mirna_pc |
| 4866 hsa-mir-361 | CDK2         | 0.302841914 mirna_pc |
| 4867 hsa-mir-361 | MSH2         | 0.343132117 mirna_pc |
| 4868 hsa-mir-361 | SALL4        | 0.309642107 mirna_pc |
| 4869 hsa-mir-361 | FBX05        | 0.320621943 mirna_pc |
| 4870 hsa-mir-361 | DCLRE1B      | 0.32936706 mirna_pc  |
| 4871 hsa-mir-361 | MDK          | 0.346548205 mirna_pc |
| 4872 hsa-mir-361 | CDC25A       | 0.367860604 mirna_pc |
| 4873 hsa-mir-361 | MARCKSL1     | 0.318545121 mirna_pc |
| 4874 hsa-mir-361 | SRRT         | 0.348335752 mirna_pc |
| 4875 hsa-mir-361 | SASS6        | 0.307598826 mirna_pc |
| 4876 hsa-mir-361 | PSRC1        | 0.325955055 mirna_pc |
| 4877 hsa-mir-361 | POU2F1       | 0.365888504 mirna_pc |
| 4878 hsa-mir-361 | TMPO         | 0.308346574 mirna_pc |
| 4879 hsa-mir-361 | VBP1         | 0.377204004 mirna_pc |
| 4880 hsa-mir-361 | LOC100128191 | 0.305218331 mirna_pc |
| 4881 hsa-mir-361 | PHF6         | 0.327213424 mirna_pc |
| 4882 hsa-mir-361 | SFRS1        | 0.339499431 mirna_pc |
| 4883 hsa-mir-361 | C4orf46      | 0.353101236 mirna_pc |
| 4884 hsa-mir-361 | UTP14A       | 0.426602024 mirna_pc |
| 4885 hsa-mir-361 | POLR2D       | 0.343336433 mirna_pc |
| 4886 hsa-mir-361 | SLC5A6       | 0.302881528 mirna_pc |
| 4887 hsa-mir-361 | ZNF695       | 0.362423765 mirna_pc |
| 4888 hsa-mir-361 | TIMM8A       | 0.34789031 mirna_pc  |
| 4889 hsa-mir-361 | NASP         | 0.35547025 mirna_pc  |
| 4890 hsa-mir-361 | NONO         | 0.408866764 mirna_pc |
| 4891 hsa-mir-361 | ELK1         | 0.314255352 mirna_pc |
| 4892 hsa-mir-361 | SUV39H2      | 0.301149227 mirna_pc |
| 4893 hsa-mir-361 | ACVR2A       | 0.323289042 mirna_pc |
| 4894 hsa-mir-361 | NKRF         | 0.31846738 mirna_pc  |
| 4895 hsa-mir-361 | MOV10        | 0.360177019 mirna_pc |
| 4896 hsa-mir-361 | PDRG1        | 0.342195164 mirna_pc |
| 4897 hsa-mir-361 | PASK         | 0.329564969 mirna_pc |
| 4898 hsa-mir-361 | FUBP1        | 0.315968613 mirna_pc |
| 4899 hsa-mir-361 | GAR1         | 0.385883394 mirna_pc |
| 4900 hsa-mir-361 | RPN2         | 0.323986421 mirna_pc |
| 4901 hsa-mir-361 | TRAPPC2      | 0.326559172 mirna_pc |
| 4902 hsa-mir-361 | ITGB3BP      | 0.327139273 mirna_pc |
| 4903 hsa-mir-361 | LAS1L        | 0.414400773 mirna_pc |
| 4904 hsa-mir-361 | ING5         | 0.33996127 mirna_pc  |
| 4905 hsa-mir-361 | CADM1        | 0.405898554 mirna_pc |
| 4906 hsa-mir-361 | POLA1        | 0.360402933 mirna_pc |
| 4907 hsa-mir-361 | C10orf2      | 0.348135786 mirna_pc |
| 4908 hsa-mir-361 | CSTF1        | 0.300812006 mirna_pc |
| 4909 hsa-mir-361 | GPAM         | 0.36214468 mirna_pc  |
| 4910 hsa-mir-361 | MEX3A        | 0.324256968 mirna_pc |
| 4911 hsa-mir-361 | PDCD11       | 0.346958184 mirna_pc |
| 4912 hsa-mir-361 | TAF5         | 0.339804581 mirna_pc |
| 4913 hsa-mir-361 | ZBTB12       | 0.302699101 mirna_pc |

|                  |           |                      |
|------------------|-----------|----------------------|
| 4914 hsa-mir-361 | TGIF2     | 0.390378838 mirna_pc |
| 4915 hsa-mir-361 | MTF2      | 0.362614318 mirna_pc |
| 4916 hsa-mir-361 | CCDC142   | 0.313498642 mirna_pc |
| 4917 hsa-mir-361 | POLE      | 0.448802169 mirna_pc |
| 4918 hsa-mir-361 | MUTYH     | 0.317055274 mirna_pc |
| 4919 hsa-mir-361 | ABCB7     | 0.303859043 mirna_pc |
| 4920 hsa-mir-361 | THOC2     | 0.349373024 mirna_pc |
| 4921 hsa-mir-361 | DDOST     | 0.315723189 mirna_pc |
| 4922 hsa-mir-361 | RBMX      | 0.400130884 mirna_pc |
| 4923 hsa-mir-361 | ZNF200    | 0.331481158 mirna_pc |
| 4924 hsa-mir-361 | MSX2      | 0.325043221 mirna_pc |
| 4925 hsa-mir-361 | DNAJC14   | 0.356309821 mirna_pc |
| 4926 hsa-mir-361 | EIF1AX    | 0.37011097 mirna_pc  |
| 4927 hsa-mir-361 | ITPRIPL1  | 0.387992187 mirna_pc |
| 4928 hsa-mir-361 | TTLL4     | 0.31526971 mirna_pc  |
| 4929 hsa-mir-361 | ATXN7L2   | 0.305971337 mirna_pc |
| 4930 hsa-mir-361 | GGT7      | 0.317824239 mirna_pc |
| 4931 hsa-mir-361 | NOTUM     | 0.339929028 mirna_pc |
| 4932 hsa-mir-361 | MORF4L2   | 0.30670717 mirna_pc  |
| 4933 hsa-mir-361 | NKAP      | 0.332262541 mirna_pc |
| 4934 hsa-mir-361 | UPF3B     | 0.381550881 mirna_pc |
| 4935 hsa-mir-361 | TBX3      | 0.344371351 mirna_pc |
| 4936 hsa-mir-361 | RBM12     | 0.303660396 mirna_pc |
| 4937 hsa-mir-361 | DDX20     | 0.403081301 mirna_pc |
| 4938 hsa-mir-361 | UBA1      | 0.305137462 mirna_pc |
| 4939 hsa-mir-361 | ZNF620    | 0.326455417 mirna_pc |
| 4940 hsa-mir-361 | RBMXL1    | 0.326006189 mirna_pc |
| 4941 hsa-mir-361 | HUNK      | 0.313384645 mirna_pc |
| 4942 hsa-mir-361 | C1orf77   | 0.302439637 mirna_pc |
| 4943 hsa-mir-361 | SFRS13A   | 0.30717435 mirna_pc  |
| 4944 hsa-mir-361 | CWF19L1   | 0.311691923 mirna_pc |
| 4945 hsa-mir-361 | TFAM      | 0.304946719 mirna_pc |
| 4946 hsa-mir-361 | MED14     | 0.312758906 mirna_pc |
| 4947 hsa-mir-361 | FAM35B2   | 0.333125998 mirna_pc |
| 4948 hsa-mir-361 | EWSR1     | 0.366457499 mirna_pc |
| 4949 hsa-mir-361 | SMC1A     | 0.430266781 mirna_pc |
| 4950 hsa-mir-361 | ACVR2B    | 0.343409061 mirna_pc |
| 4951 hsa-mir-361 | RNF113A   | 0.340914065 mirna_pc |
| 4952 hsa-mir-361 | HDAC8     | 0.327936038 mirna_pc |
| 4953 hsa-mir-361 | SFRS7     | 0.339292532 mirna_pc |
| 4954 hsa-mir-361 | BEND3     | 0.35508685 mirna_pc  |
| 4955 hsa-mir-361 | CA5BP     | 0.483809501 mirna_pc |
| 4956 hsa-mir-361 | CHM       | 0.362213497 mirna_pc |
| 4957 hsa-mir-361 | AXIN2     | 0.326233597 mirna_pc |
| 4958 hsa-mir-361 | FAM35B    | 0.329753566 mirna_pc |
| 4959 hsa-mir-361 | SYAP1     | 0.309592883 mirna_pc |
| 4960 hsa-mir-361 | YY2       | 0.306922328 mirna_pc |
| 4961 hsa-mir-361 | LOC728024 | 0.375542276 mirna_pc |
| 4962 hsa-mir-361 | GEMIN8    | 0.31461968 mirna_pc  |
| 4963 hsa-mir-361 | BHLHB9    | 0.325136566 mirna_pc |
| 4964 hsa-mir-361 | GJB1      | 0.304290738 mirna_pc |
| 4965 hsa-mir-361 | C2orf44   | 0.316050414 mirna_pc |
| 4966 hsa-mir-361 | CTR9      | 0.32651733 mirna_pc  |
| 4967 hsa-mir-361 | IFT172    | 0.308505462 mirna_pc |



|                  |            |                      |
|------------------|------------|----------------------|
| 4968 hsa-mir-361 | CCDC76     | 0.330972367 mirna_pc |
| 4969 hsa-mir-361 | ZNF233     | 0.310827537 mirna_pc |
| 4970 hsa-mir-361 | NUP43      | 0.308734125 mirna_pc |
| 4971 hsa-mir-361 | ZNF124     | 0.33340957 mirna_pc  |
| 4972 hsa-mir-361 | CHD1L      | 0.332159128 mirna_pc |
| 4973 hsa-mir-361 | ZNF473     | 0.337907004 mirna_pc |
| 4974 hsa-mir-361 | ANP32A     | 0.341606899 mirna_pc |
| 4975 hsa-mir-361 | ZNF195     | 0.316378537 mirna_pc |
| 4976 hsa-mir-361 | ZMYM4      | 0.338830106 mirna_pc |
| 4977 hsa-mir-361 | RBM15      | 0.32773187 mirna_pc  |
| 4978 hsa-mir-361 | HIC2       | 0.411235612 mirna_pc |
| 4979 hsa-mir-361 | PHF16      | 0.330937585 mirna_pc |
| 4980 hsa-mir-361 | FAM123B    | 0.30535228 mirna_pc  |
| 4981 hsa-mir-361 | IQCC       | 0.302643733 mirna_pc |
| 4982 hsa-mir-361 | MBNL3      | 0.333002422 mirna_pc |
| 4983 hsa-mir-361 | AMOT       | 0.333177957 mirna_pc |
| 4984 hsa-mir-361 | NAIF1      | 0.361390097 mirna_pc |
| 4985 hsa-mir-361 | L3MBTL2    | 0.361800541 mirna_pc |
| 4986 hsa-mir-361 | CCNJ       | 0.365471119 mirna_pc |
| 4987 hsa-mir-361 | OTUD3      | 0.362172131 mirna_pc |
| 4988 hsa-mir-361 | DCAF16     | 0.358902789 mirna_pc |
| 4989 hsa-mir-361 | KDM5C      | 0.305776992 mirna_pc |
| 4990 hsa-mir-361 | C10orf137  | 0.397427583 mirna_pc |
| 4991 hsa-mir-361 | TSR2       | 0.303171402 mirna_pc |
| 4992 hsa-mir-361 | FAM171A1   | 0.347777056 mirna_pc |
| 4993 hsa-mir-361 | RASL10B    | 0.317225731 mirna_pc |
| 4994 hsa-mir-361 | SLC25A33   | 0.369498222 mirna_pc |
| 4995 hsa-mir-361 | RLIM       | 0.314554932 mirna_pc |
| 4996 hsa-mir-361 | CTPS2      | 0.365778874 mirna_pc |
| 4997 hsa-mir-361 | SPHK2      | 0.36815591 mirna_pc  |
| 4998 hsa-mir-361 | GXYLT1     | 0.357759569 mirna_pc |
| 4999 hsa-mir-361 | ZBTB39     | 0.39396639 mirna_pc  |
| 5000 hsa-mir-361 | ZNF547     | 0.32895466 mirna_pc  |
| 5001 hsa-mir-361 | FANCF      | 0.365720537 mirna_pc |
| 5002 hsa-mir-361 | VPS54      | 0.404386302 mirna_pc |
| 5003 hsa-mir-361 | MED12      | 0.397117184 mirna_pc |
| 5004 hsa-mir-361 | TOE1       | 0.367893996 mirna_pc |
| 5005 hsa-mir-361 | ZNF551     | 0.317639142 mirna_pc |
| 5006 hsa-mir-361 | ZNF618     | 0.317527822 mirna_pc |
| 5007 hsa-mir-361 | RRP7B      | 0.303495191 mirna_pc |
| 5008 hsa-mir-361 | NCRNA00183 | 0.329259687 mirna_pc |
| 5009 hsa-mir-361 | SCML2      | 0.331151084 mirna_pc |
| 5010 hsa-mir-361 | SIKE1      | 0.350717264 mirna_pc |
| 5011 hsa-mir-361 | ASXL1      | 0.301414915 mirna_pc |
| 5012 hsa-mir-361 | ARMC2      | 0.313697931 mirna_pc |
| 5013 hsa-mir-361 | CALM3      | 0.317313062 mirna_pc |
| 5014 hsa-mir-361 | ZCCHC3     | 0.382351333 mirna_pc |
| 5015 hsa-mir-361 | RRP15      | 0.301269781 mirna_pc |
| 5016 hsa-mir-361 | WDR73      | 0.337306905 mirna_pc |
| 5017 hsa-mir-361 | COL9A2     | 0.327478987 mirna_pc |
| 5018 hsa-mir-361 | ETV5       | 0.337563032 mirna_pc |
| 5019 hsa-mir-361 | COL9A3     | 0.3025687 mirna_pc   |
| 5020 hsa-mir-361 | PROX1      | 0.353344992 mirna_pc |
| 5021 hsa-mir-361 | TAF1       | 0.30989668 mirna_pc  |

|      |             |           |             |          |
|------|-------------|-----------|-------------|----------|
| 5022 | hsa-mir-361 | TAF1L     | 0.30637831  | mirna_pc |
| 5023 | hsa-mir-361 | IGHMBP2   | 0.300886727 | mirna_pc |
| 5024 | hsa-mir-361 | NAF1      | 0.346314341 | mirna_pc |
| 5025 | hsa-mir-361 | AIMP1     | 0.312315168 | mirna_pc |
| 5026 | hsa-mir-361 | TXLNG     | 0.400662132 | mirna_pc |
| 5027 | hsa-mir-361 | PRMT6     | 0.329040787 | mirna_pc |
| 5028 | hsa-mir-361 | ZMYM3     | 0.387564829 | mirna_pc |
| 5029 | hsa-mir-361 | PIN4      | 0.31462568  | mirna_pc |
| 5030 | hsa-mir-361 | ZNF530    | 0.352991507 | mirna_pc |
| 5031 | hsa-mir-361 | ZNF239    | 0.309703663 | mirna_pc |
| 5032 | hsa-mir-361 | LOC728758 | 0.397903926 | mirna_pc |
| 5033 | hsa-mir-361 | EIF2S3    | 0.362124154 | mirna_pc |
| 5034 | hsa-mir-361 | CENPV     | 0.302980476 | mirna_pc |
| 5035 | hsa-mir-361 | SFRS6     | 0.335872355 | mirna_pc |
| 5036 | hsa-mir-361 | ZNF670    | 0.351103407 | mirna_pc |
| 5037 | hsa-mir-361 | ZNF711    | 0.484307756 | mirna_pc |
| 5038 | hsa-mir-361 | MAGT1     | 0.32734023  | mirna_pc |
| 5039 | hsa-mir-937 | CDCA8     | 0.300486449 | mirna_pc |
| 5040 | hsa-mir-937 | RCC1      | 0.304353543 | mirna_pc |
| 5041 | hsa-mir-937 | RECQL4    | 0.400405799 | mirna_pc |
| 5042 | hsa-mir-937 | ADRM1     | 0.304558158 | mirna_pc |
| 5043 | hsa-mir-937 | PIF1      | 0.302616471 | mirna_pc |
| 5044 | hsa-mir-937 | DCAF13    | 0.406149495 | mirna_pc |
| 5045 | hsa-mir-937 | NFKBIL2   | 0.433194968 | mirna_pc |
| 5046 | hsa-mir-937 | RTKN      | 0.335482474 | mirna_pc |
| 5047 | hsa-mir-937 | FAM83H    | 0.467845341 | mirna_pc |
| 5048 | hsa-mir-937 | CCT3      | 0.325931907 | mirna_pc |
| 5049 | hsa-mir-937 | GRINA     | 0.386281837 | mirna_pc |
| 5050 | hsa-mir-937 | CSE1L     | 0.309549516 | mirna_pc |
| 5051 | hsa-mir-937 | EBNA1BP2  | 0.30529717  | mirna_pc |
| 5052 | hsa-mir-937 | F12       | 0.303295608 | mirna_pc |
| 5053 | hsa-mir-937 | SF3B14    | 0.343167149 | mirna_pc |
| 5054 | hsa-mir-937 | GPR172A   | 0.495708721 | mirna_pc |
| 5055 | hsa-mir-937 | NPM3      | 0.321905941 | mirna_pc |
| 5056 | hsa-mir-937 | TMEM201   | 0.311169127 | mirna_pc |
| 5057 | hsa-mir-937 | STIP1     | 0.313608938 | mirna_pc |
| 5058 | hsa-mir-937 | TBRG4     | 0.337269417 | mirna_pc |
| 5059 | hsa-mir-937 | EIF5A     | 0.309858274 | mirna_pc |
| 5060 | hsa-mir-937 | BOP 1.00  | 0.38938612  | mirna_pc |
| 5061 | hsa-mir-937 | YWHAZ     | 0.300986714 | mirna_pc |
| 5062 | hsa-mir-937 | PA2G4     | 0.310832117 | mirna_pc |
| 5063 | hsa-mir-937 | TOMM34    | 0.374379485 | mirna_pc |
| 5064 | hsa-mir-937 | GGH       | 0.319366534 | mirna_pc |
| 5065 | hsa-mir-937 | MRPL13    | 0.307572393 | mirna_pc |
| 5066 | hsa-mir-937 | PYCRL     | 0.339728434 | mirna_pc |
| 5067 | hsa-mir-937 | GNL2      | 0.336570485 | mirna_pc |
| 5068 | hsa-mir-937 | ZC3H3     | 0.484546842 | mirna_pc |
| 5069 | hsa-mir-937 | TOP1MT    | 0.332176085 | mirna_pc |
| 5070 | hsa-mir-937 | ARHGAP39  | 0.466040676 | mirna_pc |
| 5071 | hsa-mir-937 | FBXL6     | 0.585894496 | mirna_pc |
| 5072 | hsa-mir-937 | EIF5AL1   | 0.310805561 | mirna_pc |
| 5073 | hsa-mir-937 | ADCK5     | 0.422430124 | mirna_pc |
| 5074 | hsa-mir-937 | NUPL2     | 0.411652128 | mirna_pc |
| 5075 | hsa-mir-937 | PGAM5     | 0.392984654 | mirna_pc |

|                  |          |                      |
|------------------|----------|----------------------|
| 5076 hsa-mir-937 | PUF60    | 0.531465767 mirna_pc |
| 5077 hsa-mir-937 | GAR1     | 0.306166323 mirna_pc |
| 5078 hsa-mir-937 | PRMT3    | 0.304282565 mirna_pc |
| 5079 hsa-mir-937 | IGF2BP3  | 0.322601212 mirna_pc |
| 5080 hsa-mir-937 | RAD51L3  | 0.316609286 mirna_pc |
| 5081 hsa-mir-937 | TDRD5    | 0.344323481 mirna_pc |
| 5082 hsa-mir-937 | STK31    | 0.359129419 mirna_pc |
| 5083 hsa-mir-937 | PA2G4P4  | 0.343792444 mirna_pc |
| 5084 hsa-mir-937 | RRP12    | 0.314584889 mirna_pc |
| 5085 hsa-mir-937 | CHRA1    | 0.358889615 mirna_pc |
| 5086 hsa-mir-937 | COMMD5   | 0.400469149 mirna_pc |
| 5087 hsa-mir-937 | POLR3G   | 0.305045522 mirna_pc |
| 5088 hsa-mir-937 | PSMG1    | 0.321641784 mirna_pc |
| 5089 hsa-mir-937 | C8orf73  | 0.451083474 mirna_pc |
| 5090 hsa-mir-937 | PDCD11   | 0.302561876 mirna_pc |
| 5091 hsa-mir-937 | C7orf30  | 0.442499239 mirna_pc |
| 5092 hsa-mir-937 | EXOSC4   | 0.436632781 mirna_pc |
| 5093 hsa-mir-937 | SCRIB    | 0.403396617 mirna_pc |
| 5094 hsa-mir-937 | TRAPPC9  | 0.355972749 mirna_pc |
| 5095 hsa-mir-937 | C8orf30A | 0.520288544 mirna_pc |
| 5096 hsa-mir-937 | GATA3    | 0.325629775 mirna_pc |
| 5097 hsa-mir-937 | ZNF707   | 0.326966411 mirna_pc |
| 5098 hsa-mir-937 | RRP1     | 0.340495851 mirna_pc |
| 5099 hsa-mir-937 | SPATA5L1 | 0.322560841 mirna_pc |
| 5100 hsa-mir-937 | PGLYRP4  | 0.348411796 mirna_pc |
| 5101 hsa-mir-937 | C8orf55  | 0.478708173 mirna_pc |
| 5102 hsa-mir-937 | RPL30    | 0.308990155 mirna_pc |
| 5103 hsa-mir-937 | YRDC     | 0.373250617 mirna_pc |
| 5104 hsa-mir-937 | RDH16    | 0.336887512 mirna_pc |
| 5105 hsa-mir-937 | HMG1     | 0.301635087 mirna_pc |
| 5106 hsa-mir-937 | CCT8     | 0.363959307 mirna_pc |
| 5107 hsa-mir-937 | TIGD5    | 0.39011376 mirna_pc  |
| 5108 hsa-mir-937 | EIF2C2   | 0.393108424 mirna_pc |
| 5109 hsa-mir-937 | RPS7     | 0.358542672 mirna_pc |
| 5110 hsa-mir-937 | EPPK1    | 0.318378229 mirna_pc |
| 5111 hsa-mir-937 | C8orf51  | 0.32695949 mirna_pc  |
| 5112 hsa-mir-937 | TFAP2E   | 0.313697692 mirna_pc |
| 5113 hsa-mir-937 | RPL8     | 0.39993859 mirna_pc  |
| 5114 hsa-mir-937 | NRBP2    | 0.33466652 mirna_pc  |
| 5115 hsa-mir-937 | FAM83A   | 0.344429417 mirna_pc |
| 5116 hsa-mir-937 | NLE1     | 0.392996339 mirna_pc |
| 5117 hsa-mir-937 | LYNX1    | 0.312551538 mirna_pc |
| 5118 hsa-mir-937 | ZNF7     | 0.347946692 mirna_pc |
| 5119 hsa-mir-937 | EIF3H    | 0.379432895 mirna_pc |
| 5120 hsa-mir-937 | CYP2W1   | 0.303868863 mirna_pc |
| 5121 hsa-mir-937 | RHPN1    | 0.376406228 mirna_pc |
| 5122 hsa-mir-937 | RPL5     | 0.334790697 mirna_pc |
| 5123 hsa-mir-937 | SLC19A1  | 0.323991214 mirna_pc |
| 5124 hsa-mir-937 | NAPRT1   | 0.378225999 mirna_pc |
| 5125 hsa-mir-937 | KIFC2    | 0.419440557 mirna_pc |
| 5126 hsa-mir-937 | KRT16    | 0.333727946 mirna_pc |
| 5127 hsa-mir-937 | SATB2    | 0.458819335 mirna_pc |
| 5128 hsa-mir-937 | LIG3     | 0.319400173 mirna_pc |
| 5129 hsa-mir-937 | ZFP41    | 0.358903549 mirna_pc |

|                  |          |                      |
|------------------|----------|----------------------|
| 5130 hsa-mir-937 | RPL7     | 0.366668573 mirna_pc |
| 5131 hsa-mir-937 | HSF1     | 0.472247927 mirna_pc |
| 5132 hsa-mir-937 | CPSF1    | 0.48104341 mirna_pc  |
| 5133 hsa-mir-937 | OPLAH    | 0.363841751 mirna_pc |
| 5134 hsa-mir-937 | SERBP1   | 0.337581332 mirna_pc |
| 5135 hsa-mir-937 | SPRY3    | 0.357906092 mirna_pc |
| 5136 hsa-mir-937 | DGAT1    | 0.319060317 mirna_pc |
| 5137 hsa-mir-937 | KLHL17   | 0.319864414 mirna_pc |
| 5138 hsa-mir-937 | PTK2     | 0.300415213 mirna_pc |
| 5139 hsa-mir-937 | C10orf99 | 0.324649559 mirna_pc |
| 5140 hsa-mir-937 | RPL14    | 0.305206585 mirna_pc |
| 5141 hsa-mir-937 | ZNF16    | 0.350972379 mirna_pc |
| 5142 hsa-mir-937 | PTDSS2   | 0.3385458 mirna_pc   |
| 5143 hsa-mir-937 | HEATR7A  | 0.325900445 mirna_pc |
| 5144 hsa-mir-937 | LRP11    | 0.304830042 mirna_pc |
| 5145 hsa-mir-937 | CYHR1    | 0.502632419 mirna_pc |
| 5146 hsa-mir-937 | UTP11L   | 0.316211806 mirna_pc |
| 5147 hsa-mir-937 | MFSD3    | 0.439475123 mirna_pc |
| 5148 hsa-mir-937 | TRA2A    | 0.357648952 mirna_pc |
| 5149 hsa-mir-937 | E2F5     | 0.348685672 mirna_pc |
| 5150 hsa-mir-937 | ZNF696   | 0.324863306 mirna_pc |
| 5151 hsa-mir-937 | CDC34    | 0.315120863 mirna_pc |
| 5152 hsa-mir-937 | MGC70857 | 0.30338269 mirna_pc  |
| 5153 hsa-mir-937 | PSTK     | 0.315604343 mirna_pc |
| 5154 hsa-mir-937 | JRK      | 0.331025433 mirna_pc |
| 5155 hsa-mir-937 | VPS28    | 0.380839331 mirna_pc |
| 5156 hsa-mir-937 | PSMD6    | 0.310870138 mirna_pc |
| 5157 hsa-mir-937 | C21orf59 | 0.32089872 mirna_pc  |
| 5158 hsa-mir-937 | SHARPIN  | 0.442805663 mirna_pc |
| 5159 hsa-mir-937 | PPP1R16A | 0.408381282 mirna_pc |
| 5160 hsa-mir-937 | CEACAM19 | 0.318499318 mirna_pc |
| 5161 hsa-mir-937 | LRRC14   | 0.4153282 mirna_pc   |
| 5162 hsa-mir-937 | CYCS     | 0.408448555 mirna_pc |
| 5163 hsa-mir-937 | CYC1     | 0.424039841 mirna_pc |
| 5164 hsa-mir-937 | TUBB2A   | 0.303563892 mirna_pc |
| 5165 hsa-mir-937 | NACA2    | 0.312750547 mirna_pc |
| 5166 hsa-mir-937 | EIF3E    | 0.411936593 mirna_pc |
| 5167 hsa-mir-937 | KIAA1274 | 0.326518856 mirna_pc |
| 5168 hsa-mir-937 | GPAA1    | 0.320053388 mirna_pc |
| 5169 hsa-mir-937 | MAF 1.00 | 0.316733091 mirna_pc |
| 5170 hsa-mir-937 | MYLK4    | 0.372338692 mirna_pc |
| 5171 hsa-mir-937 | C21orf70 | 0.345357645 mirna_pc |
| 5172 hsa-mir-937 | TSTA3    | 0.330890882 mirna_pc |
| 5173 hsa-mir-937 | EEF1D    | 0.337588711 mirna_pc |
| 5174 hsa-mir-17  | MKI67    | 0.371985585 mirna_pc |
| 5175 hsa-mir-17  | TPX2     | 0.411529437 mirna_pc |
| 5176 hsa-mir-17  | KIF4B    | 0.360280953 mirna_pc |
| 5177 hsa-mir-17  | TOP2A    | 0.459834234 mirna_pc |
| 5178 hsa-mir-17  | KPNA2    | 0.351986508 mirna_pc |
| 5179 hsa-mir-17  | CENPF    | 0.440610538 mirna_pc |
| 5180 hsa-mir-17  | RCC2     | 0.41483339 mirna_pc  |
| 5181 hsa-mir-17  | HOXC9    | 0.335180255 mirna_pc |
| 5182 hsa-mir-17  | KIF11    | 0.438735698 mirna_pc |
| 5183 hsa-mir-17  | ECT2     | 0.358596736 mirna_pc |

|                 |           |                      |
|-----------------|-----------|----------------------|
| 5184 hsa-mir-17 | RRM2      | 0.413800126 mirna_pc |
| 5185 hsa-mir-17 | SPC24     | 0.306491639 mirna_pc |
| 5186 hsa-mir-17 | CDK1      | 0.464850542 mirna_pc |
| 5187 hsa-mir-17 | CDC25C    | 0.403080399 mirna_pc |
| 5188 hsa-mir-17 | MYBL2     | 0.376450441 mirna_pc |
| 5189 hsa-mir-17 | PLK1      | 0.369317759 mirna_pc |
| 5190 hsa-mir-17 | PCNA      | 0.34617984 mirna_pc  |
| 5191 hsa-mir-17 | UBE2C     | 0.435440453 mirna_pc |
| 5192 hsa-mir-17 | BUB1      | 0.459994385 mirna_pc |
| 5193 hsa-mir-17 | PRC1      | 0.311225948 mirna_pc |
| 5194 hsa-mir-17 | NUSAP1    | 0.393624618 mirna_pc |
| 5195 hsa-mir-17 | MCM4      | 0.34664999 mirna_pc  |
| 5196 hsa-mir-17 | KIFC1     | 0.434459748 mirna_pc |
| 5197 hsa-mir-17 | BUB1B     | 0.466508092 mirna_pc |
| 5198 hsa-mir-17 | HDGF      | 0.383739264 mirna_pc |
| 5199 hsa-mir-17 | KIF18B    | 0.401525079 mirna_pc |
| 5200 hsa-mir-17 | ASPM      | 0.368130534 mirna_pc |
| 5201 hsa-mir-17 | CKAP2     | 0.471798219 mirna_pc |
| 5202 hsa-mir-17 | FAM72A    | 0.397583846 mirna_pc |
| 5203 hsa-mir-17 | KIF2C     | 0.420928411 mirna_pc |
| 5204 hsa-mir-17 | FANCA     | 0.483428716 mirna_pc |
| 5205 hsa-mir-17 | NCAPG     | 0.502070654 mirna_pc |
| 5206 hsa-mir-17 | CDC20     | 0.301928328 mirna_pc |
| 5207 hsa-mir-17 | CLSPN     | 0.409819175 mirna_pc |
| 5208 hsa-mir-17 | SGOL1     | 0.486515345 mirna_pc |
| 5209 hsa-mir-17 | ARHGAP11A | 0.449798265 mirna_pc |
| 5210 hsa-mir-17 | CCNA2     | 0.482716949 mirna_pc |
| 5211 hsa-mir-17 | CDC25B    | 0.307857882 mirna_pc |
| 5212 hsa-mir-17 | CBX3      | 0.409603471 mirna_pc |
| 5213 hsa-mir-17 | SPC25     | 0.502450133 mirna_pc |
| 5214 hsa-mir-17 | NUP62     | 0.314352532 mirna_pc |
| 5215 hsa-mir-17 | FANCI     | 0.416031142 mirna_pc |
| 5216 hsa-mir-17 | NEK2      | 0.568043024 mirna_pc |
| 5217 hsa-mir-17 | MND1      | 0.414521665 mirna_pc |
| 5218 hsa-mir-17 | KIF22     | 0.412946999 mirna_pc |
| 5219 hsa-mir-17 | NCAPH     | 0.472155177 mirna_pc |
| 5220 hsa-mir-17 | GTSE1     | 0.423883443 mirna_pc |
| 5221 hsa-mir-17 | KIF23     | 0.312053059 mirna_pc |
| 5222 hsa-mir-17 | RAD54L    | 0.461597044 mirna_pc |
| 5223 hsa-mir-17 | CENPA     | 0.413611492 mirna_pc |
| 5224 hsa-mir-17 | MAD2L1    | 0.58740245 mirna_pc  |
| 5225 hsa-mir-17 | TIMELESS  | 0.442189446 mirna_pc |
| 5226 hsa-mir-17 | LMNB1     | 0.47631668 mirna_pc  |
| 5227 hsa-mir-17 | ASF1B     | 0.346695449 mirna_pc |
| 5228 hsa-mir-17 | CDCA8     | 0.486729025 mirna_pc |
| 5229 hsa-mir-17 | TROAP     | 0.393203821 mirna_pc |
| 5230 hsa-mir-17 | CCNB1     | 0.316243838 mirna_pc |
| 5231 hsa-mir-17 | CDCA5     | 0.398452097 mirna_pc |
| 5232 hsa-mir-17 | TACC3     | 0.372828808 mirna_pc |
| 5233 hsa-mir-17 | XPO1      | 0.472048814 mirna_pc |
| 5234 hsa-mir-17 | CDC45     | 0.360929968 mirna_pc |
| 5235 hsa-mir-17 | STMN1     | 0.395644736 mirna_pc |
| 5236 hsa-mir-17 | CENPM     | 0.332406317 mirna_pc |
| 5237 hsa-mir-17 | EXO1      | 0.343699458 mirna_pc |

|                 |          |                      |
|-----------------|----------|----------------------|
| 5238 hsa-mir-17 | CDCA2    | 0.364771395 mirna_pc |
| 5239 hsa-mir-17 | HMGAI    | 0.311757618 mirna_pc |
| 5240 hsa-mir-17 | DKC1     | 0.348488199 mirna_pc |
| 5241 hsa-mir-17 | UBE2T    | 0.42674514 mirna_pc  |
| 5242 hsa-mir-17 | CKS2     | 0.376342024 mirna_pc |
| 5243 hsa-mir-17 | CKS1B    | 0.388949479 mirna_pc |
| 5244 hsa-mir-17 | MCM2     | 0.334443039 mirna_pc |
| 5245 hsa-mir-17 | KIF4A    | 0.36554235 mirna_pc  |
| 5246 hsa-mir-17 | ORC1L    | 0.365420073 mirna_pc |
| 5247 hsa-mir-17 | SNRPB    | 0.370885333 mirna_pc |
| 5248 hsa-mir-17 | KNTC1    | 0.405641584 mirna_pc |
| 5249 hsa-mir-17 | UHRF1    | 0.347204039 mirna_pc |
| 5250 hsa-mir-17 | CCNF     | 0.347710389 mirna_pc |
| 5251 hsa-mir-17 | PTBP1    | 0.346018322 mirna_pc |
| 5252 hsa-mir-17 | CCNB2    | 0.35643431 mirna_pc  |
| 5253 hsa-mir-17 | NUF2     | 0.455218841 mirna_pc |
| 5254 hsa-mir-17 | PLK4     | 0.500407194 mirna_pc |
| 5255 hsa-mir-17 | FANCB    | 0.390483388 mirna_pc |
| 5256 hsa-mir-17 | KIF18A   | 0.407092352 mirna_pc |
| 5257 hsa-mir-17 | DEPDC1   | 0.424524044 mirna_pc |
| 5258 hsa-mir-17 | SKA3     | 0.598904596 mirna_pc |
| 5259 hsa-mir-17 | KIF14    | 0.381721318 mirna_pc |
| 5260 hsa-mir-17 | HJURP    | 0.545347998 mirna_pc |
| 5261 hsa-mir-17 | SKA1     | 0.346027111 mirna_pc |
| 5262 hsa-mir-17 | RAD51    | 0.345519916 mirna_pc |
| 5263 hsa-mir-17 | BLM      | 0.486925121 mirna_pc |
| 5264 hsa-mir-17 | NME1     | 0.4002132 mirna_pc   |
| 5265 hsa-mir-17 | DNMT1    | 0.363503872 mirna_pc |
| 5266 hsa-mir-17 | PAICS    | 0.523890539 mirna_pc |
| 5267 hsa-mir-17 | CCDC150  | 0.478384993 mirna_pc |
| 5268 hsa-mir-17 | BIRC5    | 0.338511019 mirna_pc |
| 5269 hsa-mir-17 | RCC1     | 0.394918678 mirna_pc |
| 5270 hsa-mir-17 | LIG1     | 0.338989183 mirna_pc |
| 5271 hsa-mir-17 | OIP5     | 0.374991962 mirna_pc |
| 5272 hsa-mir-17 | DTL      | 0.469807261 mirna_pc |
| 5273 hsa-mir-17 | EME1     | 0.48266552 mirna_pc  |
| 5274 hsa-mir-17 | RECQL4   | 0.454991145 mirna_pc |
| 5275 hsa-mir-17 | AURKA    | 0.343890525 mirna_pc |
| 5276 hsa-mir-17 | CENPK    | 0.438030058 mirna_pc |
| 5277 hsa-mir-17 | AURKB    | 0.347552144 mirna_pc |
| 5278 hsa-mir-17 | GSG2     | 0.387957922 mirna_pc |
| 5279 hsa-mir-17 | CDT1     | 0.354395315 mirna_pc |
| 5280 hsa-mir-17 | CBFB     | 0.353422833 mirna_pc |
| 5281 hsa-mir-17 | MCM10    | 0.423349776 mirna_pc |
| 5282 hsa-mir-17 | SGOL2    | 0.438715609 mirna_pc |
| 5283 hsa-mir-17 | CHEK2    | 0.405762629 mirna_pc |
| 5284 hsa-mir-17 | CENPE    | 0.421762821 mirna_pc |
| 5285 hsa-mir-17 | POLQ     | 0.373155094 mirna_pc |
| 5286 hsa-mir-17 | KIF15    | 0.40702039 mirna_pc  |
| 5287 hsa-mir-17 | CDCA3    | 0.38684362 mirna_pc  |
| 5288 hsa-mir-17 | C1orf112 | 0.480185934 mirna_pc |
| 5289 hsa-mir-17 | GINS1    | 0.416414425 mirna_pc |
| 5290 hsa-mir-17 | FEN1     | 0.452440869 mirna_pc |
| 5291 hsa-mir-17 | TRAIP    | 0.442566569 mirna_pc |

|                 |           |                      |
|-----------------|-----------|----------------------|
| 5292 hsa-mir-17 | ORC6L     | 0.422880835 mirna_pc |
| 5293 hsa-mir-17 | ERH       | 0.355399074 mirna_pc |
| 5294 hsa-mir-17 | PBK       | 0.320500969 mirna_pc |
| 5295 hsa-mir-17 | C16orf59  | 0.425294241 mirna_pc |
| 5296 hsa-mir-17 | RAE1      | 0.363611743 mirna_pc |
| 5297 hsa-mir-17 | FAM72D    | 0.416269499 mirna_pc |
| 5298 hsa-mir-17 | FAM72B    | 0.440395694 mirna_pc |
| 5299 hsa-mir-17 | EZH2      | 0.398929426 mirna_pc |
| 5300 hsa-mir-17 | NEIL3     | 0.424846673 mirna_pc |
| 5301 hsa-mir-17 | POLD1     | 0.40223043 mirna_pc  |
| 5302 hsa-mir-17 | C12orf48  | 0.449913428 mirna_pc |
| 5303 hsa-mir-17 | HNRNPL    | 0.425246421 mirna_pc |
| 5304 hsa-mir-17 | ZWILCH    | 0.341681528 mirna_pc |
| 5305 hsa-mir-17 | HMMR      | 0.37235801 mirna_pc  |
| 5306 hsa-mir-17 | TTK       | 0.432447899 mirna_pc |
| 5307 hsa-mir-17 | ZWINT     | 0.489935435 mirna_pc |
| 5308 hsa-mir-17 | TUBA1B    | 0.323639004 mirna_pc |
| 5309 hsa-mir-17 | WDR67     | 0.315493 mirna_pc    |
| 5310 hsa-mir-17 | RUVBL1    | 0.305733662 mirna_pc |
| 5311 hsa-mir-17 | HOXC6     | 0.389374589 mirna_pc |
| 5312 hsa-mir-17 | BUB3      | 0.47205243 mirna_pc  |
| 5313 hsa-mir-17 | HELLS     | 0.426676259 mirna_pc |
| 5314 hsa-mir-17 | POLE2     | 0.33491878 mirna_pc  |
| 5315 hsa-mir-17 | UBE2S     | 0.342029156 mirna_pc |
| 5316 hsa-mir-17 | NCAPD2    | 0.304091576 mirna_pc |
| 5317 hsa-mir-17 | HNRNPC    | 0.427762543 mirna_pc |
| 5318 hsa-mir-17 | ILF2      | 0.400203484 mirna_pc |
| 5319 hsa-mir-17 | TCF3      | 0.383898965 mirna_pc |
| 5320 hsa-mir-17 | C6orf167  | 0.377560457 mirna_pc |
| 5321 hsa-mir-17 | CHEK1     | 0.423707141 mirna_pc |
| 5322 hsa-mir-17 | BRCA1     | 0.38810116 mirna_pc  |
| 5323 hsa-mir-17 | NDC80     | 0.301749127 mirna_pc |
| 5324 hsa-mir-17 | HNRNPA2B1 | 0.479795385 mirna_pc |
| 5325 hsa-mir-17 | RAN       | 0.338248382 mirna_pc |
| 5326 hsa-mir-17 | TYMS      | 0.374501617 mirna_pc |
| 5327 hsa-mir-17 | RFWD3     | 0.420436409 mirna_pc |
| 5328 hsa-mir-17 | C20orf20  | 0.329841933 mirna_pc |
| 5329 hsa-mir-17 | MCM6      | 0.526325628 mirna_pc |
| 5330 hsa-mir-17 | CDC6      | 0.426551317 mirna_pc |
| 5331 hsa-mir-17 | CDCA7     | 0.438136451 mirna_pc |
| 5332 hsa-mir-17 | EPRI      | 0.399557776 mirna_pc |
| 5333 hsa-mir-17 | BRIP1     | 0.311062002 mirna_pc |
| 5334 hsa-mir-17 | PIF1      | 0.40156581 mirna_pc  |
| 5335 hsa-mir-17 | H2AFX     | 0.336951926 mirna_pc |
| 5336 hsa-mir-17 | SFRS2     | 0.379276751 mirna_pc |
| 5337 hsa-mir-17 | DCAF13    | 0.369518582 mirna_pc |
| 5338 hsa-mir-17 | MTHFD1L   | 0.319950107 mirna_pc |
| 5339 hsa-mir-17 | PSMD14    | 0.339995513 mirna_pc |
| 5340 hsa-mir-17 | UCK2      | 0.436970084 mirna_pc |
| 5341 hsa-mir-17 | EFTUD2    | 0.319311057 mirna_pc |
| 5342 hsa-mir-17 | THOC4     | 0.303618519 mirna_pc |
| 5343 hsa-mir-17 | NFKBIL2   | 0.4208907 mirna_pc   |
| 5344 hsa-mir-17 | C15orf42  | 0.323620269 mirna_pc |
| 5345 hsa-mir-17 | PTGES3    | 0.347812259 mirna_pc |

|                 |          |                      |
|-----------------|----------|----------------------|
| 5346 hsa-mir-17 | PRIM2    | 0.398858204 mirna_pc |
| 5347 hsa-mir-17 | FAM60A   | 0.438092512 mirna_pc |
| 5348 hsa-mir-17 | RTKN     | 0.302206746 mirna_pc |
| 5349 hsa-mir-17 | FAM64A   | 0.368390431 mirna_pc |
| 5350 hsa-mir-17 | ATAD5    | 0.365840669 mirna_pc |
| 5351 hsa-mir-17 | RANBP1   | 0.365388707 mirna_pc |
| 5352 hsa-mir-17 | E2F1     | 0.387202405 mirna_pc |
| 5353 hsa-mir-17 | SNRPG    | 0.379480969 mirna_pc |
| 5354 hsa-mir-17 | FAM111B  | 0.347948986 mirna_pc |
| 5355 hsa-mir-17 | KIF20B   | 0.37435003 mirna_pc  |
| 5356 hsa-mir-17 | MCM3     | 0.356247163 mirna_pc |
| 5357 hsa-mir-17 | SNRPA    | 0.438721141 mirna_pc |
| 5358 hsa-mir-17 | FUS      | 0.391766243 mirna_pc |
| 5359 hsa-mir-17 | ATAD2    | 0.306849971 mirna_pc |
| 5360 hsa-mir-17 | C1orf135 | 0.312730596 mirna_pc |
| 5361 hsa-mir-17 | DNAJC9   | 0.358020157 mirna_pc |
| 5362 hsa-mir-17 | RFC3     | 0.581203272 mirna_pc |
| 5363 hsa-mir-17 | DEPDC1B  | 0.377837622 mirna_pc |
| 5364 hsa-mir-17 | POC1A    | 0.345469264 mirna_pc |
| 5365 hsa-mir-17 | ANP32E   | 0.320632168 mirna_pc |
| 5366 hsa-mir-17 | CENPO    | 0.504669561 mirna_pc |
| 5367 hsa-mir-17 | XRCC2    | 0.388292544 mirna_pc |
| 5368 hsa-mir-17 | C19orf48 | 0.40030542 mirna_pc  |
| 5369 hsa-mir-17 | BRCA2    | 0.424554537 mirna_pc |
| 5370 hsa-mir-17 | CENPL    | 0.398127259 mirna_pc |
| 5371 hsa-mir-17 | GEN1     | 0.377980308 mirna_pc |
| 5372 hsa-mir-17 | NUDT1    | 0.30382759 mirna_pc  |
| 5373 hsa-mir-17 | HMGB2    | 0.487503155 mirna_pc |
| 5374 hsa-mir-17 | CCT3     | 0.322791634 mirna_pc |
| 5375 hsa-mir-17 | GINS2    | 0.37882871 mirna_pc  |
| 5376 hsa-mir-17 | DNA2     | 0.460498057 mirna_pc |
| 5377 hsa-mir-17 | NOP56    | 0.487325179 mirna_pc |
| 5378 hsa-mir-17 | SNRPD1   | 0.313220272 mirna_pc |
| 5379 hsa-mir-17 | DSN1     | 0.311000169 mirna_pc |
| 5380 hsa-mir-17 | SNHG1    | 0.42236183 mirna_pc  |
| 5381 hsa-mir-17 | CSE1L    | 0.354551947 mirna_pc |
| 5382 hsa-mir-17 | DTYMK    | 0.497556136 mirna_pc |
| 5383 hsa-mir-17 | PRMT1    | 0.366229468 mirna_pc |
| 5384 hsa-mir-17 | MLF1IP   | 0.410295482 mirna_pc |
| 5385 hsa-mir-17 | RAVER1   | 0.342816149 mirna_pc |
| 5386 hsa-mir-17 | HEATR1   | 0.320347025 mirna_pc |
| 5387 hsa-mir-17 | HSPE1    | 0.35491593 mirna_pc  |
| 5388 hsa-mir-17 | C16orf75 | 0.350006312 mirna_pc |
| 5389 hsa-mir-17 | CAD      | 0.37071964 mirna_pc  |
| 5390 hsa-mir-17 | CCDC99   | 0.445257037 mirna_pc |
| 5391 hsa-mir-17 | CDK2     | 0.405486349 mirna_pc |
| 5392 hsa-mir-17 | CDK4     | 0.396273497 mirna_pc |
| 5393 hsa-mir-17 | INCENP   | 0.315317099 mirna_pc |
| 5394 hsa-mir-17 | HOXA10   | 0.366735668 mirna_pc |
| 5395 hsa-mir-17 | CKAP5    | 0.32873393 mirna_pc  |
| 5396 hsa-mir-17 | BCL2L12  | 0.312610085 mirna_pc |
| 5397 hsa-mir-17 | HNRNPR   | 0.402006866 mirna_pc |
| 5398 hsa-mir-17 | DLEU2    | 0.430309001 mirna_pc |
| 5399 hsa-mir-17 | PRIM1    | 0.434846392 mirna_pc |



|                 |           |                      |
|-----------------|-----------|----------------------|
| 5400 hsa-mir-17 | KAT2A     | 0.326941992 mirna_pc |
| 5401 hsa-mir-17 | CENPH     | 0.380863878 mirna_pc |
| 5402 hsa-mir-17 | GGCT      | 0.31033248 mirna_pc  |
| 5403 hsa-mir-17 | TCOF1     | 0.405343923 mirna_pc |
| 5404 hsa-mir-17 | CHAF1B    | 0.41230393 mirna_pc  |
| 5405 hsa-mir-17 | NCAPG2    | 0.371367974 mirna_pc |
| 5406 hsa-mir-17 | MSH2      | 0.512692095 mirna_pc |
| 5407 hsa-mir-17 | PRPF19    | 0.364338669 mirna_pc |
| 5408 hsa-mir-17 | EIF3B     | 0.364308051 mirna_pc |
| 5409 hsa-mir-17 | NOP58     | 0.329014378 mirna_pc |
| 5410 hsa-mir-17 | TOMM40    | 0.346955942 mirna_pc |
| 5411 hsa-mir-17 | EIF2AK1   | 0.378824265 mirna_pc |
| 5412 hsa-mir-17 | SF3B3     | 0.445567604 mirna_pc |
| 5413 hsa-mir-17 | CDC7      | 0.471341084 mirna_pc |
| 5414 hsa-mir-17 | INTS7     | 0.320461135 mirna_pc |
| 5415 hsa-mir-17 | SSB       | 0.51789761 mirna_pc  |
| 5416 hsa-mir-17 | PUS1      | 0.42793574 mirna_pc  |
| 5417 hsa-mir-17 | NOL11     | 0.406059304 mirna_pc |
| 5418 hsa-mir-17 | SNRPC     | 0.386189854 mirna_pc |
| 5419 hsa-mir-17 | RFC4      | 0.358442735 mirna_pc |
| 5420 hsa-mir-17 | FBX05     | 0.456198487 mirna_pc |
| 5421 hsa-mir-17 | WDR75     | 0.339889597 mirna_pc |
| 5422 hsa-mir-17 | FIGNL1    | 0.339682877 mirna_pc |
| 5423 hsa-mir-17 | E2F3      | 0.478921997 mirna_pc |
| 5424 hsa-mir-17 | DDX11     | 0.396173199 mirna_pc |
| 5425 hsa-mir-17 | SF3B14    | 0.327383752 mirna_pc |
| 5426 hsa-mir-17 | RUVBL2    | 0.384744411 mirna_pc |
| 5427 hsa-mir-17 | CDC25A    | 0.54076791 mirna_pc  |
| 5428 hsa-mir-17 | TMEM48    | 0.345966433 mirna_pc |
| 5429 hsa-mir-17 | RAD54B    | 0.352878545 mirna_pc |
| 5430 hsa-mir-17 | H2AFZ     | 0.436422162 mirna_pc |
| 5431 hsa-mir-17 | PRR7      | 0.331174867 mirna_pc |
| 5432 hsa-mir-17 | DDX12     | 0.358586489 mirna_pc |
| 5433 hsa-mir-17 | DSCC1     | 0.400807487 mirna_pc |
| 5434 hsa-mir-17 | WDR12     | 0.332471015 mirna_pc |
| 5435 hsa-mir-17 | C13orf34  | 0.544383604 mirna_pc |
| 5436 hsa-mir-17 | SMC2      | 0.356327723 mirna_pc |
| 5437 hsa-mir-17 | SRPK1     | 0.348829317 mirna_pc |
| 5438 hsa-mir-17 | CLN6      | 0.354535738 mirna_pc |
| 5439 hsa-mir-17 | MCM8      | 0.473346308 mirna_pc |
| 5440 hsa-mir-17 | CPSF3     | 0.427490223 mirna_pc |
| 5441 hsa-mir-17 | SNRPE     | 0.48156577 mirna_pc  |
| 5442 hsa-mir-17 | C21orf45  | 0.447762885 mirna_pc |
| 5443 hsa-mir-17 | ATIC      | 0.50063744 mirna_pc  |
| 5444 hsa-mir-17 | PPM1G     | 0.374266957 mirna_pc |
| 5445 hsa-mir-17 | MARCKSL1  | 0.343914727 mirna_pc |
| 5446 hsa-mir-17 | NPM3      | 0.41213653 mirna_pc  |
| 5447 hsa-mir-17 | TFAP4     | 0.373533854 mirna_pc |
| 5448 hsa-mir-17 | ZNF367    | 0.304796938 mirna_pc |
| 5449 hsa-mir-17 | C14orf106 | 0.317962553 mirna_pc |
| 5450 hsa-mir-17 | NUTF2     | 0.327562561 mirna_pc |
| 5451 hsa-mir-17 | DAZAP1    | 0.381190921 mirna_pc |
| 5452 hsa-mir-17 | CBX8      | 0.431489401 mirna_pc |
| 5453 hsa-mir-17 | TRMT6     | 0.305086577 mirna_pc |

|                 |              |                      |
|-----------------|--------------|----------------------|
| 5454 hsa-mir-17 | GNPDA1       | 0.376084862 mirna_pc |
| 5455 hsa-mir-17 | WDR34        | 0.38407373 mirna_pc  |
| 5456 hsa-mir-17 | TMEM201      | 0.356819609 mirna_pc |
| 5457 hsa-mir-17 | NCL          | 0.490655677 mirna_pc |
| 5458 hsa-mir-17 | NUDCD1       | 0.304294803 mirna_pc |
| 5459 hsa-mir-17 | PFDN4        | 0.316581478 mirna_pc |
| 5460 hsa-mir-17 | PAFAH1B3     | 0.301185624 mirna_pc |
| 5461 hsa-mir-17 | SRRT         | 0.340996155 mirna_pc |
| 5462 hsa-mir-17 | CACYBP       | 0.428714207 mirna_pc |
| 5463 hsa-mir-17 | DCTPP1       | 0.337123001 mirna_pc |
| 5464 hsa-mir-17 | SASS6        | 0.35642297 mirna_pc  |
| 5465 hsa-mir-17 | PSRC1        | 0.483581392 mirna_pc |
| 5466 hsa-mir-17 | ODF2         | 0.3636117 mirna_pc   |
| 5467 hsa-mir-17 | DGUOK        | 0.30401685 mirna_pc  |
| 5468 hsa-mir-17 | DBF4B        | 0.386892559 mirna_pc |
| 5469 hsa-mir-17 | POU2F1       | 0.406598415 mirna_pc |
| 5470 hsa-mir-17 | FBL          | 0.429240861 mirna_pc |
| 5471 hsa-mir-17 | DONSON       | 0.319162447 mirna_pc |
| 5472 hsa-mir-17 | C13orf37     | 0.526743699 mirna_pc |
| 5473 hsa-mir-17 | HNRNPM       | 0.344037346 mirna_pc |
| 5474 hsa-mir-17 | LSM 12.00    | 0.353939626 mirna_pc |
| 5475 hsa-mir-17 | PNPT1        | 0.459690771 mirna_pc |
| 5476 hsa-mir-17 | TMPO         | 0.446073792 mirna_pc |
| 5477 hsa-mir-17 | SET          | 0.448118798 mirna_pc |
| 5478 hsa-mir-17 | C3orf26      | 0.355375695 mirna_pc |
| 5479 hsa-mir-17 | MRT04        | 0.358341053 mirna_pc |
| 5480 hsa-mir-17 | SMPD4        | 0.365764013 mirna_pc |
| 5481 hsa-mir-17 | GPR19        | 0.316351009 mirna_pc |
| 5482 hsa-mir-17 | PSMD3        | 0.342691048 mirna_pc |
| 5483 hsa-mir-17 | GABPB1       | 0.348614977 mirna_pc |
| 5484 hsa-mir-17 | PPIH         | 0.356772775 mirna_pc |
| 5485 hsa-mir-17 | RCN1         | 0.313330757 mirna_pc |
| 5486 hsa-mir-17 | PPAT         | 0.412611198 mirna_pc |
| 5487 hsa-mir-17 | DHX9         | 0.464313689 mirna_pc |
| 5488 hsa-mir-17 | CCDC138      | 0.416994087 mirna_pc |
| 5489 hsa-mir-17 | LOC100128191 | 0.359175351 mirna_pc |
| 5490 hsa-mir-17 | HMG2         | 0.424827816 mirna_pc |
| 5491 hsa-mir-17 | ETV4         | 0.40266645 mirna_pc  |
| 5492 hsa-mir-17 | CHRNA5       | 0.344188136 mirna_pc |
| 5493 hsa-mir-17 | SMYD5        | 0.335959328 mirna_pc |
| 5494 hsa-mir-17 | TSSC1        | 0.361484076 mirna_pc |
| 5495 hsa-mir-17 | POLA2        | 0.328101426 mirna_pc |
| 5496 hsa-mir-17 | SFRS1        | 0.561560232 mirna_pc |
| 5497 hsa-mir-17 | TEX10        | 0.367293304 mirna_pc |
| 5498 hsa-mir-17 | WDR43        | 0.43520647 mirna_pc  |
| 5499 hsa-mir-17 | SNRPA1       | 0.33497434 mirna_pc  |
| 5500 hsa-mir-17 | CCDC58       | 0.355575483 mirna_pc |
| 5501 hsa-mir-17 | SKP2         | 0.408033016 mirna_pc |
| 5502 hsa-mir-17 | TIPIN        | 0.347115755 mirna_pc |
| 5503 hsa-mir-17 | SMARCD1      | 0.322567119 mirna_pc |
| 5504 hsa-mir-17 | C4orf46      | 0.462748422 mirna_pc |
| 5505 hsa-mir-17 | DARS2        | 0.394727263 mirna_pc |
| 5506 hsa-mir-17 | LYAR         | 0.393811985 mirna_pc |
| 5507 hsa-mir-17 | UTP14A       | 0.346345228 mirna_pc |

|      |            |          |             |          |
|------|------------|----------|-------------|----------|
| 5508 | hsa-mir-17 | Clorf107 | 0.30301186  | mirna_pc |
| 5509 | hsa-mir-17 | GPN1     | 0.323865827 | mirna_pc |
| 5510 | hsa-mir-17 | RFC5     | 0.354498047 | mirna_pc |
| 5511 | hsa-mir-17 | HSPD1    | 0.453771974 | mirna_pc |
| 5512 | hsa-mir-17 | MAZ      | 0.348884205 | mirna_pc |
| 5513 | hsa-mir-17 | SSRP1    | 0.45100284  | mirna_pc |
| 5514 | hsa-mir-17 | SLBP     | 0.338478786 | mirna_pc |
| 5515 | hsa-mir-17 | POLR2D   | 0.492428744 | mirna_pc |
| 5516 | hsa-mir-17 | FTSJ2    | 0.416294048 | mirna_pc |
| 5517 | hsa-mir-17 | PA2G4    | 0.395656857 | mirna_pc |
| 5518 | hsa-mir-17 | KHDRBS1  | 0.463260934 | mirna_pc |
| 5519 | hsa-mir-17 | SLC5A6   | 0.311254011 | mirna_pc |
| 5520 | hsa-mir-17 | C20orf27 | 0.343425761 | mirna_pc |
| 5521 | hsa-mir-17 | TOMM34   | 0.426992396 | mirna_pc |
| 5522 | hsa-mir-17 | MTL 5.00 | 0.365204065 | mirna_pc |
| 5523 | hsa-mir-17 | TAF1A    | 0.326064166 | mirna_pc |
| 5524 | hsa-mir-17 | RNF220   | 0.376788855 | mirna_pc |
| 5525 | hsa-mir-17 | PRPF40A  | 0.408517688 | mirna_pc |
| 5526 | hsa-mir-17 | CCDC18   | 0.325388059 | mirna_pc |
| 5527 | hsa-mir-17 | AHCY     | 0.375520377 | mirna_pc |
| 5528 | hsa-mir-17 | PARP1    | 0.402214931 | mirna_pc |
| 5529 | hsa-mir-17 | CCDC34   | 0.375753002 | mirna_pc |
| 5530 | hsa-mir-17 | CCT7     | 0.403010984 | mirna_pc |
| 5531 | hsa-mir-17 | HNRNPF   | 0.337918625 | mirna_pc |
| 5532 | hsa-mir-17 | C4orf21  | 0.323217356 | mirna_pc |
| 5533 | hsa-mir-17 | TMEM194A | 0.371712389 | mirna_pc |
| 5534 | hsa-mir-17 | SLC39A10 | 0.447348172 | mirna_pc |
| 5535 | hsa-mir-17 | RAD18    | 0.335152637 | mirna_pc |
| 5536 | hsa-mir-17 | NOLC1    | 0.328641411 | mirna_pc |
| 5537 | hsa-mir-17 | ZNF695   | 0.463551169 | mirna_pc |
| 5538 | hsa-mir-17 | PDSS1    | 0.425935703 | mirna_pc |
| 5539 | hsa-mir-17 | HAUS6    | 0.391299932 | mirna_pc |
| 5540 | hsa-mir-17 | CENPJ    | 0.476826127 | mirna_pc |
| 5541 | hsa-mir-17 | LIN9     | 0.363606449 | mirna_pc |
| 5542 | hsa-mir-17 | HNRNPU   | 0.437377651 | mirna_pc |
| 5543 | hsa-mir-17 | NASP     | 0.428539274 | mirna_pc |
| 5544 | hsa-mir-17 | NONO     | 0.35468121  | mirna_pc |
| 5545 | hsa-mir-17 | CCDC86   | 0.330544962 | mirna_pc |
| 5546 | hsa-mir-17 | POLR1B   | 0.389013982 | mirna_pc |
| 5547 | hsa-mir-17 | QSOX2    | 0.350712242 | mirna_pc |
| 5548 | hsa-mir-17 | OBFC2B   | 0.333037125 | mirna_pc |
| 5549 | hsa-mir-17 | PTMA     | 0.421191769 | mirna_pc |
| 5550 | hsa-mir-17 | WDR76    | 0.316062729 | mirna_pc |
| 5551 | hsa-mir-17 | PSMD1    | 0.345619787 | mirna_pc |
| 5552 | hsa-mir-17 | EXOSC2   | 0.398568403 | mirna_pc |
| 5553 | hsa-mir-17 | SCARB1   | 0.372053877 | mirna_pc |
| 5554 | hsa-mir-17 | C11orf84 | 0.39446924  | mirna_pc |
| 5555 | hsa-mir-17 | ARHGAP39 | 0.309382259 | mirna_pc |
| 5556 | hsa-mir-17 | TBCE     | 0.392920675 | mirna_pc |
| 5557 | hsa-mir-17 | CLCN2    | 0.348463445 | mirna_pc |
| 5558 | hsa-mir-17 | NCBP2    | 0.312719063 | mirna_pc |
| 5559 | hsa-mir-17 | SUV39H2  | 0.462452301 | mirna_pc |
| 5560 | hsa-mir-17 | LSM 2.00 | 0.331902889 | mirna_pc |
| 5561 | hsa-mir-17 | R3HDM1   | 0.329803621 | mirna_pc |

|      |            |          |             |          |
|------|------------|----------|-------------|----------|
| 5562 | hsa-mir-17 | FANCL    | 0.448330268 | mirna_pc |
| 5563 | hsa-mir-17 | RIBC2    | 0.316039846 | mirna_pc |
| 5564 | hsa-mir-17 | RQCD1    | 0.337292803 | mirna_pc |
| 5565 | hsa-mir-17 | HNRNPD   | 0.484803685 | mirna_pc |
| 5566 | hsa-mir-17 | MTHFD2   | 0.416523323 | mirna_pc |
| 5567 | hsa-mir-17 | GTF2F2   | 0.45709433  | mirna_pc |
| 5568 | hsa-mir-17 | DDX31    | 0.320657428 | mirna_pc |
| 5569 | hsa-mir-17 | GTPBP4   | 0.327774476 | mirna_pc |
| 5570 | hsa-mir-17 | TARDBP   | 0.314553241 | mirna_pc |
| 5571 | hsa-mir-17 | POP1     | 0.343910684 | mirna_pc |
| 5572 | hsa-mir-17 | SFRS3    | 0.426921278 | mirna_pc |
| 5573 | hsa-mir-17 | NUP160   | 0.301287474 | mirna_pc |
| 5574 | hsa-mir-17 | LSM 5.00 | 0.44336265  | mirna_pc |
| 5575 | hsa-mir-17 | REX04    | 0.338545659 | mirna_pc |
| 5576 | hsa-mir-17 | PNO1     | 0.371080538 | mirna_pc |
| 5577 | hsa-mir-17 | CCT4     | 0.381357607 | mirna_pc |
| 5578 | hsa-mir-17 | MITD1    | 0.329863933 | mirna_pc |
| 5579 | hsa-mir-17 | ELAVL1   | 0.421064398 | mirna_pc |
| 5580 | hsa-mir-17 | ABCE1    | 0.327422631 | mirna_pc |
| 5581 | hsa-mir-17 | MTHFD1   | 0.319332879 | mirna_pc |
| 5582 | hsa-mir-17 | C7orf40  | 0.305928211 | mirna_pc |
| 5583 | hsa-mir-17 | NCAPD3   | 0.32804079  | mirna_pc |
| 5584 | hsa-mir-17 | NAE1     | 0.386484458 | mirna_pc |
| 5585 | hsa-mir-17 | PSMC3IP  | 0.357477202 | mirna_pc |
| 5586 | hsa-mir-17 | PAK1IP1  | 0.442080393 | mirna_pc |
| 5587 | hsa-mir-17 | NUDT15   | 0.483208687 | mirna_pc |
| 5588 | hsa-mir-17 | SUPT16H  | 0.302209923 | mirna_pc |
| 5589 | hsa-mir-17 | E2F4     | 0.357499456 | mirna_pc |
| 5590 | hsa-mir-17 | TWISTNB  | 0.344859096 | mirna_pc |
| 5591 | hsa-mir-17 | DHFR     | 0.392561313 | mirna_pc |
| 5592 | hsa-mir-17 | NAA25    | 0.385412954 | mirna_pc |
| 5593 | hsa-mir-17 | ILF3     | 0.461687376 | mirna_pc |
| 5594 | hsa-mir-17 | NT5DC2   | 0.361939554 | mirna_pc |
| 5595 | hsa-mir-17 | EHMT2    | 0.415218553 | mirna_pc |
| 5596 | hsa-mir-17 | GAS2L3   | 0.311663977 | mirna_pc |
| 5597 | hsa-mir-17 | HNRNPAB  | 0.336794075 | mirna_pc |
| 5598 | hsa-mir-17 | KDM1B    | 0.332340229 | mirna_pc |
| 5599 | hsa-mir-17 | UBAP2L   | 0.302215322 | mirna_pc |
| 5600 | hsa-mir-17 | GART     | 0.338732976 | mirna_pc |
| 5601 | hsa-mir-17 | DEK      | 0.423783476 | mirna_pc |
| 5602 | hsa-mir-17 | TBC1D4   | 0.383010855 | mirna_pc |
| 5603 | hsa-mir-17 | SFRS9    | 0.333230631 | mirna_pc |
| 5604 | hsa-mir-17 | TRIB3    | 0.382656814 | mirna_pc |
| 5605 | hsa-mir-17 | CCNE2    | 0.318465815 | mirna_pc |
| 5606 | hsa-mir-17 | PASK     | 0.404063377 | mirna_pc |
| 5607 | hsa-mir-17 | SAAL1    | 0.421519127 | mirna_pc |
| 5608 | hsa-mir-17 | OLA1     | 0.332478701 | mirna_pc |
| 5609 | hsa-mir-17 | Clorf131 | 0.315931859 | mirna_pc |
| 5610 | hsa-mir-17 | RPGRIP1L | 0.317209647 | mirna_pc |
| 5611 | hsa-mir-17 | TGS1     | 0.375717042 | mirna_pc |
| 5612 | hsa-mir-17 | HEATR2   | 0.537833736 | mirna_pc |
| 5613 | hsa-mir-17 | LSM 6.00 | 0.339876018 | mirna_pc |
| 5614 | hsa-mir-17 | PRAME    | 0.408053952 | mirna_pc |
| 5615 | hsa-mir-17 | CYB5B    | 0.381681102 | mirna_pc |

|                 |           |                      |
|-----------------|-----------|----------------------|
| 5616 hsa-mir-17 | SNRPB2    | 0.38763638 mirna_pc  |
| 5617 hsa-mir-17 | AZI1      | 0.320986193 mirna_pc |
| 5618 hsa-mir-17 | FUBP1     | 0.364464215 mirna_pc |
| 5619 hsa-mir-17 | C7orf27   | 0.310765191 mirna_pc |
| 5620 hsa-mir-17 | SUV39H1   | 0.343139257 mirna_pc |
| 5621 hsa-mir-17 | IPO9      | 0.399734766 mirna_pc |
| 5622 hsa-mir-17 | SART3     | 0.351664738 mirna_pc |
| 5623 hsa-mir-17 | HNRNPK    | 0.386770668 mirna_pc |
| 5624 hsa-mir-17 | SR140     | 0.304203226 mirna_pc |
| 5625 hsa-mir-17 | TRA2B     | 0.350937726 mirna_pc |
| 5626 hsa-mir-17 | GAR1      | 0.441200793 mirna_pc |
| 5627 hsa-mir-17 | CEP152    | 0.309352294 mirna_pc |
| 5628 hsa-mir-17 | C15orf23  | 0.418677974 mirna_pc |
| 5629 hsa-mir-17 | PRMT3     | 0.306280251 mirna_pc |
| 5630 hsa-mir-17 | SDCCAG3   | 0.300952201 mirna_pc |
| 5631 hsa-mir-17 | IGF2BP2   | 0.305907429 mirna_pc |
| 5632 hsa-mir-17 | WHSC1     | 0.399960028 mirna_pc |
| 5633 hsa-mir-17 | SAE1      | 0.367415313 mirna_pc |
| 5634 hsa-mir-17 | RNF219    | 0.596056108 mirna_pc |
| 5635 hsa-mir-17 | ITGB3BP   | 0.438655294 mirna_pc |
| 5636 hsa-mir-17 | EIF2S2    | 0.313780888 mirna_pc |
| 5637 hsa-mir-17 | ENOPH1    | 0.385727881 mirna_pc |
| 5638 hsa-mir-17 | PABPC1L   | 0.312037928 mirna_pc |
| 5639 hsa-mir-17 | C4orf43   | 0.33080824 mirna_pc  |
| 5640 hsa-mir-17 | DDX55     | 0.391148907 mirna_pc |
| 5641 hsa-mir-17 | CEP78     | 0.415053832 mirna_pc |
| 5642 hsa-mir-17 | PLEKHG4   | 0.345788276 mirna_pc |
| 5643 hsa-mir-17 | CCDC103   | 0.31114224 mirna_pc  |
| 5644 hsa-mir-17 | SFPQ      | 0.413638841 mirna_pc |
| 5645 hsa-mir-17 | POMP      | 0.34016808 mirna_pc  |
| 5646 hsa-mir-17 | CD83      | 0.31482725 mirna_pc  |
| 5647 hsa-mir-17 | RCOR2     | 0.485536391 mirna_pc |
| 5648 hsa-mir-17 | ATAD3A    | 0.318589661 mirna_pc |
| 5649 hsa-mir-17 | MPHOSPH9  | 0.303915557 mirna_pc |
| 5650 hsa-mir-17 | SHMT2     | 0.304313295 mirna_pc |
| 5651 hsa-mir-17 | POLA1     | 0.368275372 mirna_pc |
| 5652 hsa-mir-17 | HDAC2     | 0.473532225 mirna_pc |
| 5653 hsa-mir-17 | GMNN      | 0.383134766 mirna_pc |
| 5654 hsa-mir-17 | PA2G4P4   | 0.355747227 mirna_pc |
| 5655 hsa-mir-17 | C10orf119 | 0.322707993 mirna_pc |
| 5656 hsa-mir-17 | POLG2     | 0.309788176 mirna_pc |
| 5657 hsa-mir-17 | C10orf2   | 0.405344453 mirna_pc |
| 5658 hsa-mir-17 | POGK      | 0.314425909 mirna_pc |
| 5659 hsa-mir-17 | GEMIN6    | 0.362295435 mirna_pc |
| 5660 hsa-mir-17 | COX4NB    | 0.320541562 mirna_pc |
| 5661 hsa-mir-17 | MSH6      | 0.374540292 mirna_pc |
| 5662 hsa-mir-17 | XRN2      | 0.349153295 mirna_pc |
| 5663 hsa-mir-17 | KPNB1     | 0.471233495 mirna_pc |
| 5664 hsa-mir-17 | SMC3      | 0.367492286 mirna_pc |
| 5665 hsa-mir-17 | FLVCR1    | 0.386549658 mirna_pc |
| 5666 hsa-mir-17 | ACBD6     | 0.323908812 mirna_pc |
| 5667 hsa-mir-17 | HNRNPA1   | 0.410495473 mirna_pc |
| 5668 hsa-mir-17 | UBA2      | 0.303581663 mirna_pc |
| 5669 hsa-mir-17 | NPM1      | 0.345511687 mirna_pc |

|                 |           |                      |
|-----------------|-----------|----------------------|
| 5670 hsa-mir-17 | ZBED4     | 0.310328789 mirna_pc |
| 5671 hsa-mir-17 | AGMAT     | 0.32852341 mirna_pc  |
| 5672 hsa-mir-17 | MEX3A     | 0.493001839 mirna_pc |
| 5673 hsa-mir-17 | BAT1      | 0.397201019 mirna_pc |
| 5674 hsa-mir-17 | COIL      | 0.41256146 mirna_pc  |
| 5675 hsa-mir-17 | PHF14     | 0.362573234 mirna_pc |
| 5676 hsa-mir-17 | PDCD11    | 0.332064414 mirna_pc |
| 5677 hsa-mir-17 | TAF5      | 0.466482966 mirna_pc |
| 5678 hsa-mir-17 | TRIM28    | 0.344445495 mirna_pc |
| 5679 hsa-mir-17 | C2orf29   | 0.313880046 mirna_pc |
| 5680 hsa-mir-17 | WDR5      | 0.344114399 mirna_pc |
| 5681 hsa-mir-17 | GAS5      | 0.306421721 mirna_pc |
| 5682 hsa-mir-17 | SUZ12     | 0.346209938 mirna_pc |
| 5683 hsa-mir-17 | HNRNPA1L2 | 0.473255284 mirna_pc |
| 5684 hsa-mir-17 | NAA15     | 0.305746564 mirna_pc |
| 5685 hsa-mir-17 | CBX1      | 0.338890222 mirna_pc |
| 5686 hsa-mir-17 | HMGB1     | 0.543802722 mirna_pc |
| 5687 hsa-mir-17 | ZBTB12    | 0.481001172 mirna_pc |
| 5688 hsa-mir-17 | DIAPH3    | 0.419657121 mirna_pc |
| 5689 hsa-mir-17 | TADA1     | 0.321724455 mirna_pc |
| 5690 hsa-mir-17 | MCTP2     | 0.315422934 mirna_pc |
| 5691 hsa-mir-17 | USP1      | 0.311635705 mirna_pc |
| 5692 hsa-mir-17 | DUSP12    | 0.32054635 mirna_pc  |
| 5693 hsa-mir-17 | TMEM68    | 0.31902011 mirna_pc  |
| 5694 hsa-mir-17 | LOC642846 | 0.320541677 mirna_pc |
| 5695 hsa-mir-17 | TGIF2     | 0.424606308 mirna_pc |
| 5696 hsa-mir-17 | H3F3A     | 0.34550739 mirna_pc  |
| 5697 hsa-mir-17 | SNAPC4    | 0.336094761 mirna_pc |
| 5698 hsa-mir-17 | ZC3H18    | 0.318237281 mirna_pc |
| 5699 hsa-mir-17 | FARSB     | 0.446075101 mirna_pc |
| 5700 hsa-mir-17 | PIK3AP1   | 0.307636545 mirna_pc |
| 5701 hsa-mir-17 | SNX5      | 0.34806905 mirna_pc  |
| 5702 hsa-mir-17 | THUMP2    | 0.311685271 mirna_pc |
| 5703 hsa-mir-17 | FAM96A    | 0.325251809 mirna_pc |
| 5704 hsa-mir-17 | MTF2      | 0.309427485 mirna_pc |
| 5705 hsa-mir-17 | TARBP2    | 0.301630906 mirna_pc |
| 5706 hsa-mir-17 | FGFR10P   | 0.325212645 mirna_pc |
| 5707 hsa-mir-17 | PHB       | 0.398545584 mirna_pc |
| 5708 hsa-mir-17 | METTL13   | 0.314591106 mirna_pc |
| 5709 hsa-mir-17 | C12orf52  | 0.320184777 mirna_pc |
| 5710 hsa-mir-17 | EBPL      | 0.326427192 mirna_pc |
| 5711 hsa-mir-17 | NOL10     | 0.442405929 mirna_pc |
| 5712 hsa-mir-17 | ANAPC1    | 0.328547511 mirna_pc |
| 5713 hsa-mir-17 | POLE      | 0.437165784 mirna_pc |
| 5714 hsa-mir-17 | C1orf163  | 0.308018295 mirna_pc |
| 5715 hsa-mir-17 | WRNIP1    | 0.304052407 mirna_pc |
| 5716 hsa-mir-17 | HMBS      | 0.360327989 mirna_pc |
| 5717 hsa-mir-17 | TAF1B     | 0.301144946 mirna_pc |
| 5718 hsa-mir-17 | SOX9      | 0.328243794 mirna_pc |
| 5719 hsa-mir-17 | TIMM50    | 0.45232614 mirna_pc  |
| 5720 hsa-mir-17 | ADSL      | 0.33160864 mirna_pc  |
| 5721 hsa-mir-17 | VRK1      | 0.352503975 mirna_pc |
| 5722 hsa-mir-17 | C13orf27  | 0.530060808 mirna_pc |
| 5723 hsa-mir-17 | RBM14     | 0.34434079 mirna_pc  |

|                 |           |                      |
|-----------------|-----------|----------------------|
| 5724 hsa-mir-17 | ANP32B    | 0.305754244 mirna_pc |
| 5725 hsa-mir-17 | EXOSC9    | 0.438735465 mirna_pc |
| 5726 hsa-mir-17 | UNG       | 0.30865742 mirna_pc  |
| 5727 hsa-mir-17 | CCDC43    | 0.353095317 mirna_pc |
| 5728 hsa-mir-17 | RBMX      | 0.509445317 mirna_pc |
| 5729 hsa-mir-17 | SRP9      | 0.401238574 mirna_pc |
| 5730 hsa-mir-17 | NOC3L     | 0.310209734 mirna_pc |
| 5731 hsa-mir-17 | UCLH3     | 0.333728935 mirna_pc |
| 5732 hsa-mir-17 | GPR180    | 0.409875431 mirna_pc |
| 5733 hsa-mir-17 | DAP3      | 0.380510305 mirna_pc |
| 5734 hsa-mir-17 | IQCB1     | 0.302153402 mirna_pc |
| 5735 hsa-mir-17 | CCDC90A   | 0.339300284 mirna_pc |
| 5736 hsa-mir-17 | MDC 1.00  | 0.317524515 mirna_pc |
| 5737 hsa-mir-17 | XRCC5     | 0.490090775 mirna_pc |
| 5738 hsa-mir-17 | SNX25     | 0.302532483 mirna_pc |
| 5739 hsa-mir-17 | RPF2      | 0.338471052 mirna_pc |
| 5740 hsa-mir-17 | EXOSC8    | 0.511308549 mirna_pc |
| 5741 hsa-mir-17 | CTCF      | 0.396807609 mirna_pc |
| 5742 hsa-mir-17 | TAF1D     | 0.321611551 mirna_pc |
| 5743 hsa-mir-17 | PDIA6     | 0.344527135 mirna_pc |
| 5744 hsa-mir-17 | RPE       | 0.341563037 mirna_pc |
| 5745 hsa-mir-17 | LBR       | 0.404304226 mirna_pc |
| 5746 hsa-mir-17 | NAA40     | 0.322252222 mirna_pc |
| 5747 hsa-mir-17 | DNAJC14   | 0.316845043 mirna_pc |
| 5748 hsa-mir-17 | FIP1L1    | 0.305375183 mirna_pc |
| 5749 hsa-mir-17 | ZNF519    | 0.347104128 mirna_pc |
| 5750 hsa-mir-17 | GTF3C3    | 0.300585521 mirna_pc |
| 5751 hsa-mir-17 | ZRANB3    | 0.305429834 mirna_pc |
| 5752 hsa-mir-17 | NUDT21    | 0.328166497 mirna_pc |
| 5753 hsa-mir-17 | MAGEF1    | 0.300445467 mirna_pc |
| 5754 hsa-mir-17 | DDX10     | 0.322652677 mirna_pc |
| 5755 hsa-mir-17 | LTV1      | 0.301268164 mirna_pc |
| 5756 hsa-mir-17 | PCGF6     | 0.31309173 mirna_pc  |
| 5757 hsa-mir-17 | OSTC      | 0.311034397 mirna_pc |
| 5758 hsa-mir-17 | FAM136A   | 0.509264223 mirna_pc |
| 5759 hsa-mir-17 | ZNF511    | 0.309575235 mirna_pc |
| 5760 hsa-mir-17 | MRPS5     | 0.341657249 mirna_pc |
| 5761 hsa-mir-17 | HMGNI     | 0.342674429 mirna_pc |
| 5762 hsa-mir-17 | MYB       | 0.315532648 mirna_pc |
| 5763 hsa-mir-17 | ITPRIPL1  | 0.38876671 mirna_pc  |
| 5764 hsa-mir-17 | TTLL4     | 0.349327606 mirna_pc |
| 5765 hsa-mir-17 | FBX041    | 0.318626291 mirna_pc |
| 5766 hsa-mir-17 | BIVM      | 0.336283248 mirna_pc |
| 5767 hsa-mir-17 | CALM2     | 0.30768804 mirna_pc  |
| 5768 hsa-mir-17 | GPATCH4   | 0.300947748 mirna_pc |
| 5769 hsa-mir-17 | EML4      | 0.306073823 mirna_pc |
| 5770 hsa-mir-17 | RPS7      | 0.310297161 mirna_pc |
| 5771 hsa-mir-17 | BZW2      | 0.423284248 mirna_pc |
| 5772 hsa-mir-17 | ACBD7     | 0.308100838 mirna_pc |
| 5773 hsa-mir-17 | LRPPRC    | 0.414527443 mirna_pc |
| 5774 hsa-mir-17 | CSNK2A1   | 0.339674995 mirna_pc |
| 5775 hsa-mir-17 | LOC401010 | 0.323394825 mirna_pc |
| 5776 hsa-mir-17 | RPIA      | 0.474383388 mirna_pc |
| 5777 hsa-mir-17 | BCL7A     | 0.332598567 mirna_pc |

|                 |          |                      |
|-----------------|----------|----------------------|
| 5778 hsa-mir-17 | C7orf44  | 0.368105025 mirna_pc |
| 5779 hsa-mir-17 | TRPA1    | 0.319986021 mirna_pc |
| 5780 hsa-mir-17 | URB2     | 0.36275405 mirna_pc  |
| 5781 hsa-mir-17 | RP9      | 0.374902778 mirna_pc |
| 5782 hsa-mir-17 | KIAA1731 | 0.303012572 mirna_pc |
| 5783 hsa-mir-17 | ZNF286A  | 0.394240539 mirna_pc |
| 5784 hsa-mir-17 | SLC27A2  | 0.309782878 mirna_pc |
| 5785 hsa-mir-17 | SFXN4    | 0.408583145 mirna_pc |
| 5786 hsa-mir-17 | PRPF38A  | 0.318284606 mirna_pc |
| 5787 hsa-mir-17 | WDR77    | 0.368517657 mirna_pc |
| 5788 hsa-mir-17 | SURF6    | 0.348689735 mirna_pc |
| 5789 hsa-mir-17 | MRPL21   | 0.303090442 mirna_pc |
| 5790 hsa-mir-17 | TCEA1    | 0.335203924 mirna_pc |
| 5791 hsa-mir-17 | NLE1     | 0.364483741 mirna_pc |
| 5792 hsa-mir-17 | RBM28    | 0.354481316 mirna_pc |
| 5793 hsa-mir-17 | RANBP17  | 0.322835137 mirna_pc |
| 5794 hsa-mir-17 | TMEM180  | 0.307078715 mirna_pc |
| 5795 hsa-mir-17 | MRE11A   | 0.300301337 mirna_pc |
| 5796 hsa-mir-17 | WDR85    | 0.31838355 mirna_pc  |
| 5797 hsa-mir-17 | USP37    | 0.300138716 mirna_pc |
| 5798 hsa-mir-17 | PPP1CC   | 0.311058265 mirna_pc |
| 5799 hsa-mir-17 | ILKAP    | 0.382456978 mirna_pc |
| 5800 hsa-mir-17 | PRR3     | 0.301412826 mirna_pc |
| 5801 hsa-mir-17 | TMEM106C | 0.328360006 mirna_pc |
| 5802 hsa-mir-17 | DLEU1    | 0.434101823 mirna_pc |
| 5803 hsa-mir-17 | C13orf23 | 0.433119672 mirna_pc |
| 5804 hsa-mir-17 | TAF4B    | 0.314379574 mirna_pc |
| 5805 hsa-mir-17 | TSFM     | 0.30748341 mirna_pc  |
| 5806 hsa-mir-17 | RBM12    | 0.319635778 mirna_pc |
| 5807 hsa-mir-17 | ZNF286B  | 0.35742871 mirna_pc  |
| 5808 hsa-mir-17 | PDF      | 0.381217933 mirna_pc |
| 5809 hsa-mir-17 | DDX20    | 0.327805474 mirna_pc |
| 5810 hsa-mir-17 | RNF34    | 0.303088819 mirna_pc |
| 5811 hsa-mir-17 | CHD7     | 0.332928294 mirna_pc |
| 5812 hsa-mir-17 | TCERG1   | 0.391578332 mirna_pc |
| 5813 hsa-mir-17 | PSPC1    | 0.490756925 mirna_pc |
| 5814 hsa-mir-17 | COPZ1    | 0.313794639 mirna_pc |
| 5815 hsa-mir-17 | CCNB1IP1 | 0.383480247 mirna_pc |
| 5816 hsa-mir-17 | MAPKAPK5 | 0.399393685 mirna_pc |
| 5817 hsa-mir-17 | GMCL1    | 0.327230689 mirna_pc |
| 5818 hsa-mir-17 | E2F6     | 0.455095141 mirna_pc |
| 5819 hsa-mir-17 | NOL7     | 0.346853915 mirna_pc |
| 5820 hsa-mir-17 | SLC25A15 | 0.47664523 mirna_pc  |
| 5821 hsa-mir-17 | B4GALT3  | 0.318440108 mirna_pc |
| 5822 hsa-mir-17 | SFRS13A  | 0.472014185 mirna_pc |
| 5823 hsa-mir-17 | SCLY     | 0.479954212 mirna_pc |
| 5824 hsa-mir-17 | STARD7   | 0.322032259 mirna_pc |
| 5825 hsa-mir-17 | GPR125   | 0.305652945 mirna_pc |
| 5826 hsa-mir-17 | NUP35    | 0.347813794 mirna_pc |
| 5827 hsa-mir-17 | SLC19A1  | 0.371888058 mirna_pc |
| 5828 hsa-mir-17 | TGDS     | 0.445591987 mirna_pc |
| 5829 hsa-mir-17 | TFAM     | 0.462149042 mirna_pc |
| 5830 hsa-mir-17 | LDLRAD3  | 0.302279365 mirna_pc |
| 5831 hsa-mir-17 | TTC27    | 0.321689348 mirna_pc |



|                 |          |                      |
|-----------------|----------|----------------------|
| 5832 hsa-mir-17 | DHRS13   | 0.323441203 mirna_pc |
| 5833 hsa-mir-17 | ORC4L    | 0.44165052 mirna_pc  |
| 5834 hsa-mir-17 | ZC3H15   | 0.316346342 mirna_pc |
| 5835 hsa-mir-17 | KIAA1704 | 0.37786584 mirna_pc  |
| 5836 hsa-mir-17 | MTIF2    | 0.440585124 mirna_pc |
| 5837 hsa-mir-17 | HNRNPA3  | 0.345938798 mirna_pc |
| 5838 hsa-mir-17 | MSL1     | 0.363843954 mirna_pc |
| 5839 hsa-mir-17 | EWSR1    | 0.390344991 mirna_pc |
| 5840 hsa-mir-17 | ZNF828   | 0.486074412 mirna_pc |
| 5841 hsa-mir-17 | SMC1A    | 0.36254124 mirna_pc  |
| 5842 hsa-mir-17 | DHX57    | 0.33486803 mirna_pc  |
| 5843 hsa-mir-17 | NUPL1    | 0.501856449 mirna_pc |
| 5844 hsa-mir-17 | DARS     | 0.314923898 mirna_pc |
| 5845 hsa-mir-17 | AAAS     | 0.307923425 mirna_pc |
| 5846 hsa-mir-17 | UBE2CBP  | 0.307285796 mirna_pc |
| 5847 hsa-mir-17 | WBP4     | 0.333357711 mirna_pc |
| 5848 hsa-mir-17 | SFT2D3   | 0.33717771 mirna_pc  |
| 5849 hsa-mir-17 | SUGT1    | 0.371007735 mirna_pc |
| 5850 hsa-mir-17 | MRPS26   | 0.373046915 mirna_pc |
| 5851 hsa-mir-17 | TUBGCP3  | 0.333037907 mirna_pc |
| 5852 hsa-mir-17 | MRPL30   | 0.384642052 mirna_pc |
| 5853 hsa-mir-17 | GNL3     | 0.361598977 mirna_pc |
| 5854 hsa-mir-17 | DHODH    | 0.343321429 mirna_pc |
| 5855 hsa-mir-17 | TSGA14   | 0.305665244 mirna_pc |
| 5856 hsa-mir-17 | UPF3A    | 0.425230627 mirna_pc |
| 5857 hsa-mir-17 | RPS16    | 0.321821189 mirna_pc |
| 5858 hsa-mir-17 | SFRS7    | 0.478587112 mirna_pc |
| 5859 hsa-mir-17 | MRPL42   | 0.35783601 mirna_pc  |
| 5860 hsa-mir-17 | C9orf100 | 0.30866319 mirna_pc  |
| 5861 hsa-mir-17 | BEND3    | 0.356297333 mirna_pc |
| 5862 hsa-mir-17 | CA5BP    | 0.315308349 mirna_pc |
| 5863 hsa-mir-17 | NFXL1    | 0.325058268 mirna_pc |
| 5864 hsa-mir-17 | PFAS     | 0.38481441 mirna_pc  |
| 5865 hsa-mir-17 | SF3B2    | 0.307348456 mirna_pc |
| 5866 hsa-mir-17 | C10orf35 | 0.300774736 mirna_pc |
| 5867 hsa-mir-17 | UCHL5    | 0.369808356 mirna_pc |
| 5868 hsa-mir-17 | RBM10    | 0.31634195 mirna_pc  |
| 5869 hsa-mir-17 | CDCA7L   | 0.427484086 mirna_pc |
| 5870 hsa-mir-17 | NUP153   | 0.310010633 mirna_pc |
| 5871 hsa-mir-17 | NIPSNAP1 | 0.325042601 mirna_pc |
| 5872 hsa-mir-17 | SERBP1   | 0.323958629 mirna_pc |
| 5873 hsa-mir-17 | SPA17    | 0.348030964 mirna_pc |
| 5874 hsa-mir-17 | WDR92    | 0.338146369 mirna_pc |
| 5875 hsa-mir-17 | C11orf57 | 0.308441585 mirna_pc |
| 5876 hsa-mir-17 | SLC35F2  | 0.319588083 mirna_pc |
| 5877 hsa-mir-17 | RCBTB1   | 0.338708156 mirna_pc |
| 5878 hsa-mir-17 | CDC16    | 0.413248309 mirna_pc |
| 5879 hsa-mir-17 | ING1     | 0.340273765 mirna_pc |
| 5880 hsa-mir-17 | EEF1E1   | 0.389537682 mirna_pc |
| 5881 hsa-mir-17 | CDK8     | 0.302245926 mirna_pc |
| 5882 hsa-mir-17 | MRPL44   | 0.325174558 mirna_pc |
| 5883 hsa-mir-17 | PTCD3    | 0.393616465 mirna_pc |
| 5884 hsa-mir-17 | ATPBD4   | 0.302317344 mirna_pc |
| 5885 hsa-mir-17 | BCAN     | 0.342096278 mirna_pc |

|                 |          |                      |
|-----------------|----------|----------------------|
| 5886 hsa-mir-17 | DHX15    | 0.306201826 mirna_pc |
| 5887 hsa-mir-17 | IWS1     | 0.337811114 mirna_pc |
| 5888 hsa-mir-17 | MAP2K6   | 0.30724499 mirna_pc  |
| 5889 hsa-mir-17 | CASP6    | 0.356398452 mirna_pc |
| 5890 hsa-mir-17 | RBM26    | 0.374152368 mirna_pc |
| 5891 hsa-mir-17 | ZNF92    | 0.310716496 mirna_pc |
| 5892 hsa-mir-17 | C2orf44  | 0.318840168 mirna_pc |
| 5893 hsa-mir-17 | TMTC4    | 0.400474836 mirna_pc |
| 5894 hsa-mir-17 | SEPHS1   | 0.424443623 mirna_pc |
| 5895 hsa-mir-17 | CBX5     | 0.317388718 mirna_pc |
| 5896 hsa-mir-17 | RMND1    | 0.41523689 mirna_pc  |
| 5897 hsa-mir-17 | GEMIN5   | 0.304782479 mirna_pc |
| 5898 hsa-mir-17 | AZIN1    | 0.31744949 mirna_pc  |
| 5899 hsa-mir-17 | RSL1D1   | 0.349738021 mirna_pc |
| 5900 hsa-mir-17 | AGBL5    | 0.362890508 mirna_pc |
| 5901 hsa-mir-17 | CEBPZ    | 0.343181967 mirna_pc |
| 5902 hsa-mir-17 | SMARCE1  | 0.386391651 mirna_pc |
| 5903 hsa-mir-17 | C8orf33  | 0.385290243 mirna_pc |
| 5904 hsa-mir-17 | MYL6B    | 0.376889471 mirna_pc |
| 5905 hsa-mir-17 | TASP1    | 0.300073942 mirna_pc |
| 5906 hsa-mir-17 | MRP63    | 0.38227369 mirna_pc  |
| 5907 hsa-mir-17 | IPO5     | 0.602240574 mirna_pc |
| 5908 hsa-mir-17 | ALG11    | 0.349906676 mirna_pc |
| 5909 hsa-mir-17 | INTS1    | 0.320502386 mirna_pc |
| 5910 hsa-mir-17 | MED28    | 0.363054013 mirna_pc |
| 5911 hsa-mir-17 | NARS2    | 0.362579886 mirna_pc |
| 5912 hsa-mir-17 | NUP43    | 0.334120965 mirna_pc |
| 5913 hsa-mir-17 | BRD3     | 0.300806956 mirna_pc |
| 5914 hsa-mir-17 | LYRM4    | 0.368315882 mirna_pc |
| 5915 hsa-mir-17 | ZNF124   | 0.376233934 mirna_pc |
| 5916 hsa-mir-17 | RNASEH2B | 0.488538192 mirna_pc |
| 5917 hsa-mir-17 | CHD1L    | 0.394667311 mirna_pc |
| 5918 hsa-mir-17 | ZNF473   | 0.407545068 mirna_pc |
| 5919 hsa-mir-17 | COPS7B   | 0.318442271 mirna_pc |
| 5920 hsa-mir-17 | USP21    | 0.313292811 mirna_pc |
| 5921 hsa-mir-17 | SNRNP48  | 0.323311155 mirna_pc |
| 5922 hsa-mir-17 | RFXAP    | 0.327793197 mirna_pc |
| 5923 hsa-mir-17 | DCLRE1A  | 0.410617283 mirna_pc |
| 5924 hsa-mir-17 | ANP32A   | 0.523121456 mirna_pc |
| 5925 hsa-mir-17 | DIS3     | 0.308327084 mirna_pc |
| 5926 hsa-mir-17 | E2F5     | 0.429057172 mirna_pc |
| 5927 hsa-mir-17 | STARD3   | 0.305530223 mirna_pc |
| 5928 hsa-mir-17 | NUFIP1   | 0.562182842 mirna_pc |
| 5929 hsa-mir-17 | ZNF195   | 0.442911 mirna_pc    |
| 5930 hsa-mir-17 | ZMYM4    | 0.326087359 mirna_pc |
| 5931 hsa-mir-17 | PRKAR1B  | 0.389378017 mirna_pc |
| 5932 hsa-mir-17 | MED4     | 0.328424023 mirna_pc |
| 5933 hsa-mir-17 | LRRCC1   | 0.351007605 mirna_pc |
| 5934 hsa-mir-17 | ASNSD1   | 0.30567265 mirna_pc  |
| 5935 hsa-mir-17 | FXN      | 0.320600638 mirna_pc |
| 5936 hsa-mir-17 | PPP5C    | 0.364140115 mirna_pc |
| 5937 hsa-mir-17 | HYLS1    | 0.343084648 mirna_pc |
| 5938 hsa-mir-17 | NEK3     | 0.364380389 mirna_pc |
| 5939 hsa-mir-17 | HNRNPH3  | 0.374281366 mirna_pc |

|                 |          |                      |
|-----------------|----------|----------------------|
| 5940 hsa-mir-17 | NAP1L1   | 0.339226085 mirna_pc |
| 5941 hsa-mir-17 | POLR1D   | 0.307790779 mirna_pc |
| 5942 hsa-mir-17 | RRP1B    | 0.347430228 mirna_pc |
| 5943 hsa-mir-17 | THSD1P1  | 0.301573806 mirna_pc |
| 5944 hsa-mir-17 | NSL1     | 0.392091885 mirna_pc |
| 5945 hsa-mir-17 | VIL1     | 0.328497668 mirna_pc |
| 5946 hsa-mir-17 | GSDMB    | 0.375778458 mirna_pc |
| 5947 hsa-mir-17 | TMEM170A | 0.360784417 mirna_pc |
| 5948 hsa-mir-17 | EPDR1    | 0.305963684 mirna_pc |
| 5949 hsa-mir-17 | KIAA1383 | 0.324858417 mirna_pc |
| 5950 hsa-mir-17 | BCCIP    | 0.320557045 mirna_pc |
| 5951 hsa-mir-17 | PTPLAD1  | 0.337183072 mirna_pc |
| 5952 hsa-mir-17 | IQCC     | 0.340035777 mirna_pc |
| 5953 hsa-mir-17 | FAM48A   | 0.4681308 mirna_pc   |
| 5954 hsa-mir-17 | PMS1     | 0.389203767 mirna_pc |
| 5955 hsa-mir-17 | DNAJC15  | 0.323202492 mirna_pc |
| 5956 hsa-mir-17 | MNS1     | 0.35938333 mirna_pc  |
| 5957 hsa-mir-17 | CHCHD3   | 0.384441056 mirna_pc |
| 5958 hsa-mir-17 | CCDC122  | 0.368151581 mirna_pc |
| 5959 hsa-mir-17 | TRUB1    | 0.312589751 mirna_pc |
| 5960 hsa-mir-17 | ZMYM2    | 0.379378391 mirna_pc |
| 5961 hsa-mir-17 | C2orf15  | 0.315303958 mirna_pc |
| 5962 hsa-mir-17 | UGT8     | 0.31288872 mirna_pc  |
| 5963 hsa-mir-17 | CCNJ     | 0.508563651 mirna_pc |
| 5964 hsa-mir-17 | PIBF1    | 0.31482478 mirna_pc  |
| 5965 hsa-mir-17 | DCAF16   | 0.3823489 mirna_pc   |
| 5966 hsa-mir-17 | SBK1     | 0.404524468 mirna_pc |
| 5967 hsa-mir-17 | IPO7     | 0.307751293 mirna_pc |
| 5968 hsa-mir-17 | ABCC4    | 0.32255111 mirna_pc  |
| 5969 hsa-mir-17 | KBTBD6   | 0.389215168 mirna_pc |
| 5970 hsa-mir-17 | USP13    | 0.368957695 mirna_pc |
| 5971 hsa-mir-17 | ESF1     | 0.318470675 mirna_pc |
| 5972 hsa-mir-17 | MOSC1    | 0.312582581 mirna_pc |
| 5973 hsa-mir-17 | SLC25A33 | 0.396722969 mirna_pc |
| 5974 hsa-mir-17 | SMARCC1  | 0.384413435 mirna_pc |
| 5975 hsa-mir-17 | CTPS2    | 0.418988129 mirna_pc |
| 5976 hsa-mir-17 | GXYLT1   | 0.312490831 mirna_pc |
| 5977 hsa-mir-17 | BCS1L    | 0.304043537 mirna_pc |
| 5978 hsa-mir-17 | PACRGL   | 0.355379205 mirna_pc |
| 5979 hsa-mir-17 | C2orf56  | 0.324526449 mirna_pc |
| 5980 hsa-mir-17 | XP04     | 0.444202201 mirna_pc |
| 5981 hsa-mir-17 | TSEN2    | 0.310294812 mirna_pc |
| 5982 hsa-mir-17 | DDX51    | 0.337360471 mirna_pc |
| 5983 hsa-mir-17 | C21orf59 | 0.32303925 mirna_pc  |
| 5984 hsa-mir-17 | ZNF232   | 0.382678765 mirna_pc |
| 5985 hsa-mir-17 | ZBTB39   | 0.348648278 mirna_pc |
| 5986 hsa-mir-17 | SNRNP27  | 0.304383466 mirna_pc |
| 5987 hsa-mir-17 | METTL10  | 0.320239675 mirna_pc |
| 5988 hsa-mir-17 | MRPL16   | 0.346918283 mirna_pc |
| 5989 hsa-mir-17 | IFT88    | 0.458823419 mirna_pc |
| 5990 hsa-mir-17 | ESD      | 0.388663135 mirna_pc |
| 5991 hsa-mir-17 | QRSL1    | 0.311473002 mirna_pc |
| 5992 hsa-mir-17 | FANCF    | 0.401314046 mirna_pc |
| 5993 hsa-mir-17 | MARS2    | 0.326036107 mirna_pc |

|                 |            |                      |
|-----------------|------------|----------------------|
| 5994 hsa-mir-17 | VPS54      | 0.322249455 mirna_pc |
| 5995 hsa-mir-17 | ZBTB24     | 0.302808057 mirna_pc |
| 5996 hsa-mir-17 | RBBP4      | 0.351308263 mirna_pc |
| 5997 hsa-mir-17 | CIAO1      | 0.401487549 mirna_pc |
| 5998 hsa-mir-17 | C2orf3     | 0.422235479 mirna_pc |
| 5999 hsa-mir-17 | THAP4      | 0.312936886 mirna_pc |
| 6000 hsa-mir-17 | FAM119A    | 0.393801006 mirna_pc |
| 6001 hsa-mir-17 | ZNF664     | 0.359527707 mirna_pc |
| 6002 hsa-mir-17 | GOLT1A     | 0.346189443 mirna_pc |
| 6003 hsa-mir-17 | SCML2      | 0.362468195 mirna_pc |
| 6004 hsa-mir-17 | MRPL19     | 0.41120402 mirna_pc  |
| 6005 hsa-mir-17 | EFHA1      | 0.339101343 mirna_pc |
| 6006 hsa-mir-17 | ABCB10     | 0.32519662 mirna_pc  |
| 6007 hsa-mir-17 | KPNA3      | 0.338392007 mirna_pc |
| 6008 hsa-mir-17 | ZCCHC3     | 0.481576358 mirna_pc |
| 6009 hsa-mir-17 | RRP15      | 0.441084578 mirna_pc |
| 6010 hsa-mir-17 | ETV5       | 0.394184265 mirna_pc |
| 6011 hsa-mir-17 | COX7A2L    | 0.310964508 mirna_pc |
| 6012 hsa-mir-17 | CASC3      | 0.301580699 mirna_pc |
| 6013 hsa-mir-17 | AADAT      | 0.467592792 mirna_pc |
| 6014 hsa-mir-17 | ACP1       | 0.438785765 mirna_pc |
| 6015 hsa-mir-17 | C2orf43    | 0.378427918 mirna_pc |
| 6016 hsa-mir-17 | DACH1      | 0.352972815 mirna_pc |
| 6017 hsa-mir-17 | RARA       | 0.320053811 mirna_pc |
| 6018 hsa-mir-17 | ACTR3B     | 0.346248242 mirna_pc |
| 6019 hsa-mir-17 | GTF3A      | 0.463930269 mirna_pc |
| 6020 hsa-mir-17 | ZNF48      | 0.34010241 mirna_pc  |
| 6021 hsa-mir-17 | AIMP1      | 0.324609813 mirna_pc |
| 6022 hsa-mir-17 | TPP2       | 0.420147249 mirna_pc |
| 6023 hsa-mir-17 | SPRED2     | 0.330745659 mirna_pc |
| 6024 hsa-mir-17 | CD320      | 0.321322136 mirna_pc |
| 6025 hsa-mir-17 | TXLNG      | 0.36263927 mirna_pc  |
| 6026 hsa-mir-17 | TRIM25     | 0.304397163 mirna_pc |
| 6027 hsa-mir-17 | PRMT6      | 0.3535648 mirna_pc   |
| 6028 hsa-mir-17 | MRPS9      | 0.352536824 mirna_pc |
| 6029 hsa-mir-17 | PPP1R1B    | 0.362013815 mirna_pc |
| 6030 hsa-mir-17 | ANAPC5     | 0.300855335 mirna_pc |
| 6031 hsa-mir-17 | NCRNA00188 | 0.343814158 mirna_pc |
| 6032 hsa-mir-17 | MIR17HG    | 0.455281076 mirna_pc |
| 6033 hsa-mir-17 | MRPS23     | 0.32549849 mirna_pc  |
| 6034 hsa-mir-17 | AARSD1     | 0.392933572 mirna_pc |
| 6035 hsa-mir-17 | PRDX3      | 0.353508277 mirna_pc |
| 6036 hsa-mir-17 | BOD1       | 0.312710906 mirna_pc |
| 6037 hsa-mir-17 | ZNF239     | 0.330387378 mirna_pc |
| 6038 hsa-mir-17 | SAP18      | 0.321397711 mirna_pc |
| 6039 hsa-mir-17 | KLHL23     | 0.358850314 mirna_pc |
| 6040 hsa-mir-17 | TMEM14B    | 0.400048404 mirna_pc |
| 6041 hsa-mir-17 | SMARCA1    | 0.317385872 mirna_pc |
| 6042 hsa-mir-17 | ZNF77      | 0.31495684 mirna_pc  |
| 6043 hsa-mir-17 | C20orf7    | 0.304186935 mirna_pc |
| 6044 hsa-mir-17 | EIF2S3     | 0.344712433 mirna_pc |
| 6045 hsa-mir-17 | MRPS31     | 0.408630053 mirna_pc |
| 6046 hsa-mir-17 | CENPV      | 0.418004872 mirna_pc |
| 6047 hsa-mir-17 | DNMT3A     | 0.474091249 mirna_pc |

|      |              |          |             |          |
|------|--------------|----------|-------------|----------|
| 6048 | hsa-mir-17   | MIPEP    | 0.420806381 | mirna_pc |
| 6049 | hsa-mir-17   | PRTFDC1  | 0.39049012  | mirna_pc |
| 6050 | hsa-mir-17   | CARS2    | 0.375547921 | mirna_pc |
| 6051 | hsa-mir-17   | ZNF90    | 0.303610087 | mirna_pc |
| 6052 | hsa-mir-17   | PATZ1    | 0.381629333 | mirna_pc |
| 6053 | hsa-mir-17   | ZNF670   | 0.314677287 | mirna_pc |
| 6054 | hsa-mir-17   | PARK7    | 0.300823503 | mirna_pc |
| 6055 | hsa-mir-301a | TPX2     | 0.327930245 | mirna_pc |
| 6056 | hsa-mir-301a | KPNA2    | 0.326036111 | mirna_pc |
| 6057 | hsa-mir-301a | CENPF    | 0.316384671 | mirna_pc |
| 6058 | hsa-mir-301a | RCC2     | 0.411125094 | mirna_pc |
| 6059 | hsa-mir-301a | HOXC9    | 0.373597796 | mirna_pc |
| 6060 | hsa-mir-301a | KIF11    | 0.343010715 | mirna_pc |
| 6061 | hsa-mir-301a | RRM2     | 0.349871555 | mirna_pc |
| 6062 | hsa-mir-301a | CDC25C   | 0.350416243 | mirna_pc |
| 6063 | hsa-mir-301a | UBE2C    | 0.394773501 | mirna_pc |
| 6064 | hsa-mir-301a | NUSAP1   | 0.364754295 | mirna_pc |
| 6065 | hsa-mir-301a | MCM4     | 0.357375856 | mirna_pc |
| 6066 | hsa-mir-301a | BUB1B    | 0.343679463 | mirna_pc |
| 6067 | hsa-mir-301a | KIF18B   | 0.35687225  | mirna_pc |
| 6068 | hsa-mir-301a | KIF2C    | 0.421213422 | mirna_pc |
| 6069 | hsa-mir-301a | NCAPG    | 0.441887184 | mirna_pc |
| 6070 | hsa-mir-301a | CDC20    | 0.324131441 | mirna_pc |
| 6071 | hsa-mir-301a | CLSPN    | 0.381769342 | mirna_pc |
| 6072 | hsa-mir-301a | CCNA2    | 0.410519682 | mirna_pc |
| 6073 | hsa-mir-301a | FANCI    | 0.315180726 | mirna_pc |
| 6074 | hsa-mir-301a | NEK2     | 0.309842922 | mirna_pc |
| 6075 | hsa-mir-301a | MND1     | 0.467302074 | mirna_pc |
| 6076 | hsa-mir-301a | KIF22    | 0.350424236 | mirna_pc |
| 6077 | hsa-mir-301a | FAM49B   | 0.326631935 | mirna_pc |
| 6078 | hsa-mir-301a | NCAPH    | 0.361747687 | mirna_pc |
| 6079 | hsa-mir-301a | KIF23    | 0.329296703 | mirna_pc |
| 6080 | hsa-mir-301a | RAD54L   | 0.394192874 | mirna_pc |
| 6081 | hsa-mir-301a | CENPA    | 0.427738103 | mirna_pc |
| 6082 | hsa-mir-301a | MAD2L1   | 0.460645884 | mirna_pc |
| 6083 | hsa-mir-301a | TIMELESS | 0.388596148 | mirna_pc |
| 6084 | hsa-mir-301a | LMNB1    | 0.396993145 | mirna_pc |
| 6085 | hsa-mir-301a | DLGAP5   | 0.305757277 | mirna_pc |
| 6086 | hsa-mir-301a | TROAP    | 0.451063436 | mirna_pc |
| 6087 | hsa-mir-301a | CCNB1    | 0.355140639 | mirna_pc |
| 6088 | hsa-mir-301a | CDCA5    | 0.321211699 | mirna_pc |
| 6089 | hsa-mir-301a | STMN1    | 0.431216902 | mirna_pc |
| 6090 | hsa-mir-301a | EXO1     | 0.300714307 | mirna_pc |
| 6091 | hsa-mir-301a | TK1      | 0.306798018 | mirna_pc |
| 6092 | hsa-mir-301a | DKC1     | 0.375867243 | mirna_pc |
| 6093 | hsa-mir-301a | CKS1B    | 0.325639689 | mirna_pc |
| 6094 | hsa-mir-301a | TUBB     | 0.397317898 | mirna_pc |
| 6095 | hsa-mir-301a | KIAA0101 | 0.376099086 | mirna_pc |
| 6096 | hsa-mir-301a | KIF4A    | 0.326577735 | mirna_pc |
| 6097 | hsa-mir-301a | ORC1L    | 0.351931213 | mirna_pc |
| 6098 | hsa-mir-301a | KNTC1    | 0.38404283  | mirna_pc |
| 6099 | hsa-mir-301a | CCNF     | 0.329977733 | mirna_pc |
| 6100 | hsa-mir-301a | CCNB2    | 0.375113148 | mirna_pc |
| 6101 | hsa-mir-301a | NUF2     | 0.520487415 | mirna_pc |

|                   |           |                      |
|-------------------|-----------|----------------------|
| 6102 hsa-mir-301a | PLK4      | 0.47443104 mirna_pc  |
| 6103 hsa-mir-301a | KIF18A    | 0.354966448 mirna_pc |
| 6104 hsa-mir-301a | DEPDC1    | 0.34581352 mirna_pc  |
| 6105 hsa-mir-301a | PTTG1     | 0.310675129 mirna_pc |
| 6106 hsa-mir-301a | HJURP     | 0.366191782 mirna_pc |
| 6107 hsa-mir-301a | SKA1      | 0.326251769 mirna_pc |
| 6108 hsa-mir-301a | NME1      | 0.31607193 mirna_pc  |
| 6109 hsa-mir-301a | DNMT1     | 0.326371289 mirna_pc |
| 6110 hsa-mir-301a | PAICS     | 0.433343383 mirna_pc |
| 6111 hsa-mir-301a | BIRC5     | 0.447794859 mirna_pc |
| 6112 hsa-mir-301a | RCC1      | 0.348385946 mirna_pc |
| 6113 hsa-mir-301a | DTL       | 0.368544976 mirna_pc |
| 6114 hsa-mir-301a | EME1      | 0.330025766 mirna_pc |
| 6115 hsa-mir-301a | RECQL4    | 0.357740135 mirna_pc |
| 6116 hsa-mir-301a | AURKB     | 0.473647217 mirna_pc |
| 6117 hsa-mir-301a | CBFB      | 0.312861559 mirna_pc |
| 6118 hsa-mir-301a | MCM10     | 0.336093609 mirna_pc |
| 6119 hsa-mir-301a | KIF20A    | 0.450727858 mirna_pc |
| 6120 hsa-mir-301a | SGOL2     | 0.300280998 mirna_pc |
| 6121 hsa-mir-301a | CENPE     | 0.325049266 mirna_pc |
| 6122 hsa-mir-301a | CDCA3     | 0.39272272 mirna_pc  |
| 6123 hsa-mir-301a | C1orf112  | 0.417006044 mirna_pc |
| 6124 hsa-mir-301a | GINS1     | 0.351427581 mirna_pc |
| 6125 hsa-mir-301a | ORC6L     | 0.39151457 mirna_pc  |
| 6126 hsa-mir-301a | ERH       | 0.30589485 mirna_pc  |
| 6127 hsa-mir-301a | C16orf59  | 0.410236943 mirna_pc |
| 6128 hsa-mir-301a | NEIL3     | 0.41361355 mirna_pc  |
| 6129 hsa-mir-301a | ACTL6A    | 0.473014297 mirna_pc |
| 6130 hsa-mir-301a | ZNF229    | 0.378823843 mirna_pc |
| 6131 hsa-mir-301a | C12orf48  | 0.364849775 mirna_pc |
| 6132 hsa-mir-301a | HNRNPL    | 0.388651042 mirna_pc |
| 6133 hsa-mir-301a | SMC4      | 0.418182579 mirna_pc |
| 6134 hsa-mir-301a | PKMYT1    | 0.341182318 mirna_pc |
| 6135 hsa-mir-301a | TTK       | 0.348892811 mirna_pc |
| 6136 hsa-mir-301a | SF3B4     | 0.330846266 mirna_pc |
| 6137 hsa-mir-301a | TUBA1B    | 0.342139916 mirna_pc |
| 6138 hsa-mir-301a | HELLS     | 0.342418462 mirna_pc |
| 6139 hsa-mir-301a | POLE2     | 0.346512859 mirna_pc |
| 6140 hsa-mir-301a | UBE2S     | 0.386226271 mirna_pc |
| 6141 hsa-mir-301a | NCAPD2    | 0.340063464 mirna_pc |
| 6142 hsa-mir-301a | C11orf82  | 0.451919558 mirna_pc |
| 6143 hsa-mir-301a | HNRNPC    | 0.41012034 mirna_pc  |
| 6144 hsa-mir-301a | ILF2      | 0.310540077 mirna_pc |
| 6145 hsa-mir-301a | C6orf167  | 0.360127218 mirna_pc |
| 6146 hsa-mir-301a | HNRNPA2B1 | 0.387224119 mirna_pc |
| 6147 hsa-mir-301a | TYMS      | 0.314225311 mirna_pc |
| 6148 hsa-mir-301a | RNASEH2A  | 0.366857659 mirna_pc |
| 6149 hsa-mir-301a | EPR1      | 0.40084767 mirna_pc  |
| 6150 hsa-mir-301a | BRIP1     | 0.322152355 mirna_pc |
| 6151 hsa-mir-301a | PIF1      | 0.338813102 mirna_pc |
| 6152 hsa-mir-301a | SFRS2     | 0.36699176 mirna_pc  |
| 6153 hsa-mir-301a | DCAF13    | 0.327710328 mirna_pc |
| 6154 hsa-mir-301a | UCK2      | 0.453076298 mirna_pc |
| 6155 hsa-mir-301a | WDHD1     | 0.319078122 mirna_pc |

|                   |           |                      |
|-------------------|-----------|----------------------|
| 6156 hsa-mir-301a | NFKBIL2   | 0.397121303 mirna_pc |
| 6157 hsa-mir-301a | C15orf42  | 0.338369412 mirna_pc |
| 6158 hsa-mir-301a | PRIM2     | 0.311200349 mirna_pc |
| 6159 hsa-mir-301a | HMGB3     | 0.307696491 mirna_pc |
| 6160 hsa-mir-301a | MTBP      | 0.328316034 mirna_pc |
| 6161 hsa-mir-301a | SNRPG     | 0.334578645 mirna_pc |
| 6162 hsa-mir-301a | EIF4A3    | 0.344381932 mirna_pc |
| 6163 hsa-mir-301a | SNRPA     | 0.356058719 mirna_pc |
| 6164 hsa-mir-301a | FUS       | 0.496436316 mirna_pc |
| 6165 hsa-mir-301a | ATAD2     | 0.321315931 mirna_pc |
| 6166 hsa-mir-301a | U2AF2     | 0.454950362 mirna_pc |
| 6167 hsa-mir-301a | CHAF1A    | 0.347535714 mirna_pc |
| 6168 hsa-mir-301a | DEPDC1B   | 0.317283403 mirna_pc |
| 6169 hsa-mir-301a | GINS4     | 0.376977233 mirna_pc |
| 6170 hsa-mir-301a | ANP32E    | 0.492075518 mirna_pc |
| 6171 hsa-mir-301a | CENPO     | 0.352888916 mirna_pc |
| 6172 hsa-mir-301a | CENPL     | 0.317982303 mirna_pc |
| 6173 hsa-mir-301a | NUDT1     | 0.313042983 mirna_pc |
| 6174 hsa-mir-301a | HMGB2     | 0.472162864 mirna_pc |
| 6175 hsa-mir-301a | GINS2     | 0.353453896 mirna_pc |
| 6176 hsa-mir-301a | DNA2      | 0.319331034 mirna_pc |
| 6177 hsa-mir-301a | CDCA4     | 0.345217148 mirna_pc |
| 6178 hsa-mir-301a | CSE1L     | 0.374917685 mirna_pc |
| 6179 hsa-mir-301a | E2F7      | 0.390188841 mirna_pc |
| 6180 hsa-mir-301a | PRMT1     | 0.303934105 mirna_pc |
| 6181 hsa-mir-301a | MLF1IP    | 0.339673312 mirna_pc |
| 6182 hsa-mir-301a | C16orf75  | 0.326631814 mirna_pc |
| 6183 hsa-mir-301a | HIST1H2AE | 0.457009226 mirna_pc |
| 6184 hsa-mir-301a | CCDC99    | 0.320455567 mirna_pc |
| 6185 hsa-mir-301a | CDK2      | 0.359056417 mirna_pc |
| 6186 hsa-mir-301a | PFDN2     | 0.412087981 mirna_pc |
| 6187 hsa-mir-301a | CHTF18    | 0.339634077 mirna_pc |
| 6188 hsa-mir-301a | ENO1      | 0.374454519 mirna_pc |
| 6189 hsa-mir-301a | HNRNPR    | 0.485452387 mirna_pc |
| 6190 hsa-mir-301a | DLEU2     | 0.338696974 mirna_pc |
| 6191 hsa-mir-301a | PRIM1     | 0.344888372 mirna_pc |
| 6192 hsa-mir-301a | CENPH     | 0.360571801 mirna_pc |
| 6193 hsa-mir-301a | PSMC4     | 0.322547513 mirna_pc |
| 6194 hsa-mir-301a | TCOF1     | 0.334428622 mirna_pc |
| 6195 hsa-mir-301a | CHAF1B    | 0.33650007 mirna_pc  |
| 6196 hsa-mir-301a | ACYP1     | 0.324351418 mirna_pc |
| 6197 hsa-mir-301a | MSH2      | 0.441345217 mirna_pc |
| 6198 hsa-mir-301a | DBF4      | 0.464190711 mirna_pc |
| 6199 hsa-mir-301a | CDC7      | 0.440173893 mirna_pc |
| 6200 hsa-mir-301a | NOL11     | 0.392205286 mirna_pc |
| 6201 hsa-mir-301a | PSMB4     | 0.311193222 mirna_pc |
| 6202 hsa-mir-301a | RFC4      | 0.450447969 mirna_pc |
| 6203 hsa-mir-301a | FBX05     | 0.430292432 mirna_pc |
| 6204 hsa-mir-301a | FIGNL1    | 0.456861865 mirna_pc |
| 6205 hsa-mir-301a | BRIX1     | 0.336954016 mirna_pc |
| 6206 hsa-mir-301a | E2F3      | 0.350162012 mirna_pc |
| 6207 hsa-mir-301a | SF3B14    | 0.306172599 mirna_pc |
| 6208 hsa-mir-301a | RAD54B    | 0.390740103 mirna_pc |
| 6209 hsa-mir-301a | H2AFZ     | 0.320836019 mirna_pc |

|                   |              |                      |
|-------------------|--------------|----------------------|
| 6210 hsa-mir-301a | NRM          | 0.382782345 mirna_pc |
| 6211 hsa-mir-301a | MAGOH        | 0.348131607 mirna_pc |
| 6212 hsa-mir-301a | DDX12        | 0.420853627 mirna_pc |
| 6213 hsa-mir-301a | CPSF3        | 0.477419658 mirna_pc |
| 6214 hsa-mir-301a | BANF1        | 0.398150793 mirna_pc |
| 6215 hsa-mir-301a | C21orf45     | 0.423697668 mirna_pc |
| 6216 hsa-mir-301a | DNAJB11      | 0.329658274 mirna_pc |
| 6217 hsa-mir-301a | TFAP4        | 0.379679962 mirna_pc |
| 6218 hsa-mir-301a | RNPS1        | 0.323542658 mirna_pc |
| 6219 hsa-mir-301a | DAZAP1       | 0.337252654 mirna_pc |
| 6220 hsa-mir-301a | CBX8         | 0.407416087 mirna_pc |
| 6221 hsa-mir-301a | TMEM201      | 0.440754002 mirna_pc |
| 6222 hsa-mir-301a | NCL          | 0.318531886 mirna_pc |
| 6223 hsa-mir-301a | PFDN4        | 0.41336163 mirna_pc  |
| 6224 hsa-mir-301a | PAFAH1B3     | 0.356288117 mirna_pc |
| 6225 hsa-mir-301a | CACYBP       | 0.400384932 mirna_pc |
| 6226 hsa-mir-301a | SASS6        | 0.357730129 mirna_pc |
| 6227 hsa-mir-301a | PSRC1        | 0.40414866 mirna_pc  |
| 6228 hsa-mir-301a | DGUOK        | 0.407937227 mirna_pc |
| 6229 hsa-mir-301a | MRPL47       | 0.392675892 mirna_pc |
| 6230 hsa-mir-301a | STIP1        | 0.335925505 mirna_pc |
| 6231 hsa-mir-301a | HNRNPM       | 0.367436986 mirna_pc |
| 6232 hsa-mir-301a | CCT6A        | 0.347001463 mirna_pc |
| 6233 hsa-mir-301a | POLR2H       | 0.36557062 mirna_pc  |
| 6234 hsa-mir-301a | SSBP3        | 0.331412544 mirna_pc |
| 6235 hsa-mir-301a | C20orf72     | 0.337361594 mirna_pc |
| 6236 hsa-mir-301a | MRT04        | 0.350846155 mirna_pc |
| 6237 hsa-mir-301a | SHFM1        | 0.372823336 mirna_pc |
| 6238 hsa-mir-301a | GPR19        | 0.394733746 mirna_pc |
| 6239 hsa-mir-301a | LSG1         | 0.341987045 mirna_pc |
| 6240 hsa-mir-301a | GABPB1       | 0.452961643 mirna_pc |
| 6241 hsa-mir-301a | PPIH         | 0.349585641 mirna_pc |
| 6242 hsa-mir-301a | THOC6        | 0.339560877 mirna_pc |
| 6243 hsa-mir-301a | GMPS         | 0.309941855 mirna_pc |
| 6244 hsa-mir-301a | PPAT         | 0.363163714 mirna_pc |
| 6245 hsa-mir-301a | DHX9         | 0.321660383 mirna_pc |
| 6246 hsa-mir-301a | CCDC138      | 0.358669331 mirna_pc |
| 6247 hsa-mir-301a | LOC100128191 | 0.454119473 mirna_pc |
| 6248 hsa-mir-301a | HMG2         | 0.339520354 mirna_pc |
| 6249 hsa-mir-301a | SMYD5        | 0.335221326 mirna_pc |
| 6250 hsa-mir-301a | SF3A2        | 0.316136844 mirna_pc |
| 6251 hsa-mir-301a | TSSC1        | 0.303987291 mirna_pc |
| 6252 hsa-mir-301a | POLA2        | 0.310019372 mirna_pc |
| 6253 hsa-mir-301a | SNRPF        | 0.348746256 mirna_pc |
| 6254 hsa-mir-301a | SUMO2        | 0.523885455 mirna_pc |
| 6255 hsa-mir-301a | SFRS1        | 0.379058216 mirna_pc |
| 6256 hsa-mir-301a | SNRPA1       | 0.416158421 mirna_pc |
| 6257 hsa-mir-301a | SKP2         | 0.352082193 mirna_pc |
| 6258 hsa-mir-301a | SMC6         | 0.349893721 mirna_pc |
| 6259 hsa-mir-301a | HOXD9        | 0.309796832 mirna_pc |
| 6260 hsa-mir-301a | UBE2I        | 0.385063079 mirna_pc |
| 6261 hsa-mir-301a | TIPIN        | 0.393978555 mirna_pc |
| 6262 hsa-mir-301a | SMARCD1      | 0.355820318 mirna_pc |
| 6263 hsa-mir-301a | ATXN2L       | 0.335643068 mirna_pc |



|                   |          |                      |
|-------------------|----------|----------------------|
| 6264 hsa-mir-301a | HSPBP1   | 0.304518642 mirna_pc |
| 6265 hsa-mir-301a | C4orf46  | 0.349893211 mirna_pc |
| 6266 hsa-mir-301a | ECE2     | 0.367630246 mirna_pc |
| 6267 hsa-mir-301a | RFC5     | 0.414668695 mirna_pc |
| 6268 hsa-mir-301a | PA2G4    | 0.325232314 mirna_pc |
| 6269 hsa-mir-301a | SNRPD3   | 0.333486026 mirna_pc |
| 6270 hsa-mir-301a | KHDRBS1  | 0.478007658 mirna_pc |
| 6271 hsa-mir-301a | SPAST    | 0.313264877 mirna_pc |
| 6272 hsa-mir-301a | CCDC21   | 0.35842388 mirna_pc  |
| 6273 hsa-mir-301a | MTL 5.00 | 0.341086508 mirna_pc |
| 6274 hsa-mir-301a | CCDC18   | 0.31317364 mirna_pc  |
| 6275 hsa-mir-301a | MTERFD1  | 0.311377873 mirna_pc |
| 6276 hsa-mir-301a | C4orf21  | 0.319957399 mirna_pc |
| 6277 hsa-mir-301a | TMEM194A | 0.342432922 mirna_pc |
| 6278 hsa-mir-301a | MED30    | 0.435554906 mirna_pc |
| 6279 hsa-mir-301a | TMEM69   | 0.364855105 mirna_pc |
| 6280 hsa-mir-301a | NEDD1    | 0.362007004 mirna_pc |
| 6281 hsa-mir-301a | CEP135   | 0.30469206 mirna_pc  |
| 6282 hsa-mir-301a | JUB      | 0.304622436 mirna_pc |
| 6283 hsa-mir-301a | GNL2     | 0.338444936 mirna_pc |
| 6284 hsa-mir-301a | RAD21    | 0.368073049 mirna_pc |
| 6285 hsa-mir-301a | HNRNPU   | 0.328998258 mirna_pc |
| 6286 hsa-mir-301a | NOC2L    | 0.325471928 mirna_pc |
| 6287 hsa-mir-301a | NASP     | 0.44515668 mirna_pc  |
| 6288 hsa-mir-301a | RPP40    | 0.341994858 mirna_pc |
| 6289 hsa-mir-301a | ZC3H3    | 0.301342668 mirna_pc |
| 6290 hsa-mir-301a | ZNF280C  | 0.302116807 mirna_pc |
| 6291 hsa-mir-301a | PTMA     | 0.43388917 mirna_pc  |
| 6292 hsa-mir-301a | WDR76    | 0.324854652 mirna_pc |
| 6293 hsa-mir-301a | DENR     | 0.324094381 mirna_pc |
| 6294 hsa-mir-301a | DUSP11   | 0.301746602 mirna_pc |
| 6295 hsa-mir-301a | C11orf84 | 0.370902794 mirna_pc |
| 6296 hsa-mir-301a | TOP1MT   | 0.306050328 mirna_pc |
| 6297 hsa-mir-301a | TBCE     | 0.346413023 mirna_pc |
| 6298 hsa-mir-301a | LRRC8D   | 0.38120811 mirna_pc  |
| 6299 hsa-mir-301a | NCBP2    | 0.402520387 mirna_pc |
| 6300 hsa-mir-301a | FBX022OS | 0.342217657 mirna_pc |
| 6301 hsa-mir-301a | SUV39H2  | 0.315350798 mirna_pc |
| 6302 hsa-mir-301a | HOXA9    | 0.35495471 mirna_pc  |
| 6303 hsa-mir-301a | GORAB    | 0.333574568 mirna_pc |
| 6304 hsa-mir-301a | HNRNPD   | 0.468369608 mirna_pc |
| 6305 hsa-mir-301a | DPY30    | 0.435030093 mirna_pc |
| 6306 hsa-mir-301a | TARDBP   | 0.324247374 mirna_pc |
| 6307 hsa-mir-301a | SFRS3    | 0.322622917 mirna_pc |
| 6308 hsa-mir-301a | MEN1     | 0.340984039 mirna_pc |
| 6309 hsa-mir-301a | CCT4     | 0.352045674 mirna_pc |
| 6310 hsa-mir-301a | RAD9A    | 0.343588095 mirna_pc |
| 6311 hsa-mir-301a | DUSP9    | 0.359570163 mirna_pc |
| 6312 hsa-mir-301a | TFAP2A   | 0.324010243 mirna_pc |
| 6313 hsa-mir-301a | NCAPD3   | 0.356266385 mirna_pc |
| 6314 hsa-mir-301a | NAE1     | 0.358893137 mirna_pc |
| 6315 hsa-mir-301a | PSMC3IP  | 0.358786194 mirna_pc |
| 6316 hsa-mir-301a | TBC1D7   | 0.353415036 mirna_pc |
| 6317 hsa-mir-301a | PAK1IP1  | 0.383810351 mirna_pc |

|                   |          |                      |
|-------------------|----------|----------------------|
| 6318 hsa-mir-301a | RPAP3    | 0.350348333 mirna_pc |
| 6319 hsa-mir-301a | TRMT112  | 0.356508084 mirna_pc |
| 6320 hsa-mir-301a | KPTN     | 0.394156787 mirna_pc |
| 6321 hsa-mir-301a | PSMD2    | 0.323578668 mirna_pc |
| 6322 hsa-mir-301a | ATP13A3  | 0.342753569 mirna_pc |
| 6323 hsa-mir-301a | PMAIP1   | 0.328610673 mirna_pc |
| 6324 hsa-mir-301a | RNF2     | 0.30537396 mirna_pc  |
| 6325 hsa-mir-301a | YWHAE    | 0.44898722 mirna_pc  |
| 6326 hsa-mir-301a | KDM1A    | 0.345060208 mirna_pc |
| 6327 hsa-mir-301a | C3orf57  | 0.331790414 mirna_pc |
| 6328 hsa-mir-301a | UBAP2L   | 0.398801695 mirna_pc |
| 6329 hsa-mir-301a | PUF60    | 0.315571505 mirna_pc |
| 6330 hsa-mir-301a | DEK      | 0.45623841 mirna_pc  |
| 6331 hsa-mir-301a | SKA2     | 0.371861146 mirna_pc |
| 6332 hsa-mir-301a | TGS1     | 0.300723231 mirna_pc |
| 6333 hsa-mir-301a | KHSRP    | 0.375468944 mirna_pc |
| 6334 hsa-mir-301a | LSM 6.00 | 0.348672362 mirna_pc |
| 6335 hsa-mir-301a | PRAME    | 0.432643429 mirna_pc |
| 6336 hsa-mir-301a | MRPS17   | 0.354708971 mirna_pc |
| 6337 hsa-mir-301a | TNFRSF18 | 0.331753715 mirna_pc |
| 6338 hsa-mir-301a | FUBP1    | 0.344312209 mirna_pc |
| 6339 hsa-mir-301a | TIPRL    | 0.313360802 mirna_pc |
| 6340 hsa-mir-301a | TRA2B    | 0.423894153 mirna_pc |
| 6341 hsa-mir-301a | RSRC1    | 0.424639493 mirna_pc |
| 6342 hsa-mir-301a | GAR1     | 0.389876695 mirna_pc |
| 6343 hsa-mir-301a | C15orf23 | 0.347230482 mirna_pc |
| 6344 hsa-mir-301a | C3orf21  | 0.34266233 mirna_pc  |
| 6345 hsa-mir-301a | PSMD12   | 0.485228851 mirna_pc |
| 6346 hsa-mir-301a | ZNF668   | 0.336216864 mirna_pc |
| 6347 hsa-mir-301a | TDG      | 0.350909444 mirna_pc |
| 6348 hsa-mir-301a | ITGB3BP  | 0.310763256 mirna_pc |
| 6349 hsa-mir-301a | ENOPH1   | 0.444809781 mirna_pc |
| 6350 hsa-mir-301a | C19orf47 | 0.374476492 mirna_pc |
| 6351 hsa-mir-301a | C4orf43  | 0.378369578 mirna_pc |
| 6352 hsa-mir-301a | XRCC3    | 0.314935064 mirna_pc |
| 6353 hsa-mir-301a | YY1      | 0.340956819 mirna_pc |
| 6354 hsa-mir-301a | DDX55    | 0.35547152 mirna_pc  |
| 6355 hsa-mir-301a | C16orf80 | 0.313585386 mirna_pc |
| 6356 hsa-mir-301a | PLEKHG4  | 0.338837144 mirna_pc |
| 6357 hsa-mir-301a | SFPQ     | 0.470379544 mirna_pc |
| 6358 hsa-mir-301a | CNOT3    | 0.306566415 mirna_pc |
| 6359 hsa-mir-301a | VPS72    | 0.355879957 mirna_pc |
| 6360 hsa-mir-301a | ODF2L    | 0.343689232 mirna_pc |
| 6361 hsa-mir-301a | EIF4EBP1 | 0.406484121 mirna_pc |
| 6362 hsa-mir-301a | CADM1    | 0.483324692 mirna_pc |
| 6363 hsa-mir-301a | HDAC2    | 0.347766105 mirna_pc |
| 6364 hsa-mir-301a | GMNN     | 0.380677654 mirna_pc |
| 6365 hsa-mir-301a | WDR53    | 0.34950464 mirna_pc  |
| 6366 hsa-mir-301a | ALOX12P2 | 0.353841895 mirna_pc |
| 6367 hsa-mir-301a | ANKRD32  | 0.403934411 mirna_pc |
| 6368 hsa-mir-301a | CHRA1    | 0.335204148 mirna_pc |
| 6369 hsa-mir-301a | PDAP1    | 0.478706982 mirna_pc |
| 6370 hsa-mir-301a | RNF7     | 0.407345542 mirna_pc |
| 6371 hsa-mir-301a | GEMIN6   | 0.39535225 mirna_pc  |

|                   |           |                      |
|-------------------|-----------|----------------------|
| 6372 hsa-mir-301a | H3F3B     | 0.33293694 mirna_pc  |
| 6373 hsa-mir-301a | FAM86C    | 0.351471698 mirna_pc |
| 6374 hsa-mir-301a | CLSTN1    | 0.324230687 mirna_pc |
| 6375 hsa-mir-301a | PTCD1     | 0.473208479 mirna_pc |
| 6376 hsa-mir-301a | CRIP1     | 0.423072878 mirna_pc |
| 6377 hsa-mir-301a | MSH6      | 0.425804132 mirna_pc |
| 6378 hsa-mir-301a | C3orf34   | 0.402306653 mirna_pc |
| 6379 hsa-mir-301a | TPRKB     | 0.372569297 mirna_pc |
| 6380 hsa-mir-301a | TP73      | 0.377569599 mirna_pc |
| 6381 hsa-mir-301a | KPNB1     | 0.30130959 mirna_pc  |
| 6382 hsa-mir-301a | LEF1      | 0.350546803 mirna_pc |
| 6383 hsa-mir-301a | SMC3      | 0.356453169 mirna_pc |
| 6384 hsa-mir-301a | POLB      | 0.342522868 mirna_pc |
| 6385 hsa-mir-301a | HNRNPA1   | 0.343165044 mirna_pc |
| 6386 hsa-mir-301a | PPP1R8    | 0.416850069 mirna_pc |
| 6387 hsa-mir-301a | NPM1      | 0.304990498 mirna_pc |
| 6388 hsa-mir-301a | CDK2AP1   | 0.373216897 mirna_pc |
| 6389 hsa-mir-301a | KREMEN2   | 0.325661295 mirna_pc |
| 6390 hsa-mir-301a | NUDT3     | 0.380604197 mirna_pc |
| 6391 hsa-mir-301a | MEX3A     | 0.482739115 mirna_pc |
| 6392 hsa-mir-301a | ATP5J2    | 0.438162201 mirna_pc |
| 6393 hsa-mir-301a | COIL      | 0.398099904 mirna_pc |
| 6394 hsa-mir-301a | BUD31     | 0.412052006 mirna_pc |
| 6395 hsa-mir-301a | C16orf88  | 0.344249472 mirna_pc |
| 6396 hsa-mir-301a | EXOSC4    | 0.310093431 mirna_pc |
| 6397 hsa-mir-301a | B3GALT6   | 0.314967596 mirna_pc |
| 6398 hsa-mir-301a | APEX1     | 0.308062938 mirna_pc |
| 6399 hsa-mir-301a | MAD2L2    | 0.365618895 mirna_pc |
| 6400 hsa-mir-301a | HNRNPA1L2 | 0.382882152 mirna_pc |
| 6401 hsa-mir-301a | CBX1      | 0.342379781 mirna_pc |
| 6402 hsa-mir-301a | EMILIN3   | 0.359879747 mirna_pc |
| 6403 hsa-mir-301a | ZBTB12    | 0.329228336 mirna_pc |
| 6404 hsa-mir-301a | TMEM68    | 0.358284995 mirna_pc |
| 6405 hsa-mir-301a | LOC642846 | 0.423906656 mirna_pc |
| 6406 hsa-mir-301a | TGIF2     | 0.343077529 mirna_pc |
| 6407 hsa-mir-301a | C16orf87  | 0.33489034 mirna_pc  |
| 6408 hsa-mir-301a | RCN2      | 0.382205911 mirna_pc |
| 6409 hsa-mir-301a | THUMP2    | 0.389295904 mirna_pc |
| 6410 hsa-mir-301a | MTF2      | 0.333276204 mirna_pc |
| 6411 hsa-mir-301a | PSMD7     | 0.303138112 mirna_pc |
| 6412 hsa-mir-301a | C16orf53  | 0.303003133 mirna_pc |
| 6413 hsa-mir-301a | NOL10     | 0.397821211 mirna_pc |
| 6414 hsa-mir-301a | DDX47     | 0.303934464 mirna_pc |
| 6415 hsa-mir-301a | POLE      | 0.359087657 mirna_pc |
| 6416 hsa-mir-301a | MUTYH     | 0.324423098 mirna_pc |
| 6417 hsa-mir-301a | WRNIP1    | 0.403152055 mirna_pc |
| 6418 hsa-mir-301a | CTDSPL2   | 0.305216213 mirna_pc |
| 6419 hsa-mir-301a | TAF1B     | 0.398454551 mirna_pc |
| 6420 hsa-mir-301a | XRCC6BP1  | 0.412909753 mirna_pc |
| 6421 hsa-mir-301a | VRK1      | 0.330498968 mirna_pc |
| 6422 hsa-mir-301a | RIOK1     | 0.313897375 mirna_pc |
| 6423 hsa-mir-301a | EXOSC9    | 0.478572601 mirna_pc |
| 6424 hsa-mir-301a | MPHOSPH6  | 0.326470998 mirna_pc |
| 6425 hsa-mir-301a | ZNF707    | 0.304495691 mirna_pc |

|                   |           |                      |
|-------------------|-----------|----------------------|
| 6426 hsa-mir-301a | UNG       | 0.323343766 mirna_pc |
| 6427 hsa-mir-301a | CCDC43    | 0.359052008 mirna_pc |
| 6428 hsa-mir-301a | NRD1      | 0.339525898 mirna_pc |
| 6429 hsa-mir-301a | RBMX      | 0.392500687 mirna_pc |
| 6430 hsa-mir-301a | TEL02     | 0.343839878 mirna_pc |
| 6431 hsa-mir-301a | ALKBH2    | 0.364791637 mirna_pc |
| 6432 hsa-mir-301a | LOC374443 | 0.371254178 mirna_pc |
| 6433 hsa-mir-301a | RPF2      | 0.331668723 mirna_pc |
| 6434 hsa-mir-301a | CLK2      | 0.326896902 mirna_pc |
| 6435 hsa-mir-301a | NHLRC1    | 0.319348593 mirna_pc |
| 6436 hsa-mir-301a | RPL39L    | 0.324988064 mirna_pc |
| 6437 hsa-mir-301a | GPN3      | 0.383350018 mirna_pc |
| 6438 hsa-mir-301a | ASB3      | 0.38785481 mirna_pc  |
| 6439 hsa-mir-301a | CHORDC1   | 0.306145115 mirna_pc |
| 6440 hsa-mir-301a | MEMO1     | 0.464437838 mirna_pc |
| 6441 hsa-mir-301a | CCDC23    | 0.3851209 mirna_pc   |
| 6442 hsa-mir-301a | IGSF9     | 0.422066258 mirna_pc |
| 6443 hsa-mir-301a | UBXN2A    | 0.434091405 mirna_pc |
| 6444 hsa-mir-301a | FIP1L1    | 0.350617788 mirna_pc |
| 6445 hsa-mir-301a | KDM2B     | 0.306702554 mirna_pc |
| 6446 hsa-mir-301a | SCLT1     | 0.334526442 mirna_pc |
| 6447 hsa-mir-301a | MAGEF1    | 0.413249856 mirna_pc |
| 6448 hsa-mir-301a | PSMC1     | 0.34701502 mirna_pc  |
| 6449 hsa-mir-301a | ENY2      | 0.323534199 mirna_pc |
| 6450 hsa-mir-301a | PCGF6     | 0.331011312 mirna_pc |
| 6451 hsa-mir-301a | TTC32     | 0.42445448 mirna_pc  |
| 6452 hsa-mir-301a | SMN2      | 0.431740271 mirna_pc |
| 6453 hsa-mir-301a | U2AF1     | 0.300466983 mirna_pc |
| 6454 hsa-mir-301a | FAM92A1   | 0.32925218 mirna_pc  |
| 6455 hsa-mir-301a | ZNF639    | 0.364531938 mirna_pc |
| 6456 hsa-mir-301a | SART1     | 0.322115617 mirna_pc |
| 6457 hsa-mir-301a | ITPRIPL1  | 0.308333969 mirna_pc |
| 6458 hsa-mir-301a | ABT1      | 0.406906643 mirna_pc |
| 6459 hsa-mir-301a | SLC16A1   | 0.359114937 mirna_pc |
| 6460 hsa-mir-301a | MPHOSPH10 | 0.384296355 mirna_pc |
| 6461 hsa-mir-301a | AKAP9     | 0.407739613 mirna_pc |
| 6462 hsa-mir-301a | ATXN7L2   | 0.314916694 mirna_pc |
| 6463 hsa-mir-301a | MKRN3     | 0.35256631 mirna_pc  |
| 6464 hsa-mir-301a | PABPN1    | 0.437046488 mirna_pc |
| 6465 hsa-mir-301a | RFC1      | 0.313718746 mirna_pc |
| 6466 hsa-mir-301a | ATN1      | 0.315788692 mirna_pc |
| 6467 hsa-mir-301a | METAP2    | 0.393635512 mirna_pc |
| 6468 hsa-mir-301a | BCL7A     | 0.390455026 mirna_pc |
| 6469 hsa-mir-301a | CDC23     | 0.300800833 mirna_pc |
| 6470 hsa-mir-301a | WNT10A    | 0.423830364 mirna_pc |
| 6471 hsa-mir-301a | TIMM16    | 0.303697008 mirna_pc |
| 6472 hsa-mir-301a | MRPS28    | 0.365368994 mirna_pc |
| 6473 hsa-mir-301a | DVL2      | 0.312566097 mirna_pc |
| 6474 hsa-mir-301a | C7orf44   | 0.336491802 mirna_pc |
| 6475 hsa-mir-301a | NUDCD2    | 0.334607789 mirna_pc |
| 6476 hsa-mir-301a | ZNF286A   | 0.3931049 mirna_pc   |
| 6477 hsa-mir-301a | MRPL21    | 0.433372656 mirna_pc |
| 6478 hsa-mir-301a | TCEA1     | 0.383382454 mirna_pc |
| 6479 hsa-mir-301a | FXR1      | 0.402016965 mirna_pc |

|                   |            |                      |
|-------------------|------------|----------------------|
| 6480 hsa-mir-301a | DMRTA2     | 0.381382762 mirna_pc |
| 6481 hsa-mir-301a | PPP1R14C   | 0.358045955 mirna_pc |
| 6482 hsa-mir-301a | UPF3B      | 0.355938111 mirna_pc |
| 6483 hsa-mir-301a | BTG3       | 0.30826009 mirna_pc  |
| 6484 hsa-mir-301a | LOC645332  | 0.315191149 mirna_pc |
| 6485 hsa-mir-301a | MRPS22     | 0.304546328 mirna_pc |
| 6486 hsa-mir-301a | EVC2       | 0.341157938 mirna_pc |
| 6487 hsa-mir-301a | MGC72080   | 0.410091491 mirna_pc |
| 6488 hsa-mir-301a | CNTR0B     | 0.337355619 mirna_pc |
| 6489 hsa-mir-301a | TRRAP      | 0.306927426 mirna_pc |
| 6490 hsa-mir-301a | SEMA4F     | 0.385825622 mirna_pc |
| 6491 hsa-mir-301a | RDH14      | 0.354403069 mirna_pc |
| 6492 hsa-mir-301a | MPV17      | 0.301544432 mirna_pc |
| 6493 hsa-mir-301a | ZNF286B    | 0.329749319 mirna_pc |
| 6494 hsa-mir-301a | DDX20      | 0.394783245 mirna_pc |
| 6495 hsa-mir-301a | GBAP1      | 0.304994433 mirna_pc |
| 6496 hsa-mir-301a | UBE2N      | 0.343553601 mirna_pc |
| 6497 hsa-mir-301a | CHCHD2     | 0.324041731 mirna_pc |
| 6498 hsa-mir-301a | TMEM67     | 0.302200568 mirna_pc |
| 6499 hsa-mir-301a | PIGX       | 0.388269388 mirna_pc |
| 6500 hsa-mir-301a | HTRA2      | 0.308696157 mirna_pc |
| 6501 hsa-mir-301a | CHAC2      | 0.327980551 mirna_pc |
| 6502 hsa-mir-301a | ACN9       | 0.354026662 mirna_pc |
| 6503 hsa-mir-301a | PFN2       | 0.332079154 mirna_pc |
| 6504 hsa-mir-301a | TCERG1     | 0.338009038 mirna_pc |
| 6505 hsa-mir-301a | INTU       | 0.445322609 mirna_pc |
| 6506 hsa-mir-301a | UBE2V2     | 0.336689711 mirna_pc |
| 6507 hsa-mir-301a | ATP6V1E2   | 0.325913707 mirna_pc |
| 6508 hsa-mir-301a | GPR3       | 0.312644242 mirna_pc |
| 6509 hsa-mir-301a | E2F6       | 0.406846816 mirna_pc |
| 6510 hsa-mir-301a | SSSCA1     | 0.302715312 mirna_pc |
| 6511 hsa-mir-301a | NOL7       | 0.324105131 mirna_pc |
| 6512 hsa-mir-301a | PRPSAP2    | 0.314108638 mirna_pc |
| 6513 hsa-mir-301a | CPSF4      | 0.476926625 mirna_pc |
| 6514 hsa-mir-301a | ACTR6      | 0.359194052 mirna_pc |
| 6515 hsa-mir-301a | SFRS13A    | 0.393047688 mirna_pc |
| 6516 hsa-mir-301a | GADD45GIP1 | 0.322310342 mirna_pc |
| 6517 hsa-mir-301a | SCLY       | 0.355015534 mirna_pc |
| 6518 hsa-mir-301a | NT5C       | 0.390989392 mirna_pc |
| 6519 hsa-mir-301a | PTMS       | 0.328010601 mirna_pc |
| 6520 hsa-mir-301a | CCDC59     | 0.318886033 mirna_pc |
| 6521 hsa-mir-301a | SLC4A1AP   | 0.422729039 mirna_pc |
| 6522 hsa-mir-301a | TTC27      | 0.394311206 mirna_pc |
| 6523 hsa-mir-301a | DHRS13     | 0.412019468 mirna_pc |
| 6524 hsa-mir-301a | TFAP2C     | 0.315974582 mirna_pc |
| 6525 hsa-mir-301a | RTTN       | 0.361325739 mirna_pc |
| 6526 hsa-mir-301a | LOC222699  | 0.444110397 mirna_pc |
| 6527 hsa-mir-301a | KRR1       | 0.367432291 mirna_pc |
| 6528 hsa-mir-301a | DHX57      | 0.38784041 mirna_pc  |
| 6529 hsa-mir-301a | HIST1H1C   | 0.409887494 mirna_pc |
| 6530 hsa-mir-301a | ALX3       | 0.30143694 mirna_pc  |
| 6531 hsa-mir-301a | AAAS       | 0.368652476 mirna_pc |
| 6532 hsa-mir-301a | CHST14     | 0.301873054 mirna_pc |
| 6533 hsa-mir-301a | SUPT7L     | 0.310869546 mirna_pc |

|                   |              |                      |
|-------------------|--------------|----------------------|
| 6534 hsa-mir-301a | C6orf147     | 0.304200657 mirna_pc |
| 6535 hsa-mir-301a | ZNF277       | 0.342334768 mirna_pc |
| 6536 hsa-mir-301a | PELP1        | 0.373732642 mirna_pc |
| 6537 hsa-mir-301a | THOC1        | 0.308912448 mirna_pc |
| 6538 hsa-mir-301a | C11orf45     | 0.352730595 mirna_pc |
| 6539 hsa-mir-301a | CCDC15       | 0.37667386 mirna_pc  |
| 6540 hsa-mir-301a | SFRS7        | 0.362933862 mirna_pc |
| 6541 hsa-mir-301a | IFRD1        | 0.347147228 mirna_pc |
| 6542 hsa-mir-301a | SARS2        | 0.317904567 mirna_pc |
| 6543 hsa-mir-301a | C10orf35     | 0.321373977 mirna_pc |
| 6544 hsa-mir-301a | LOC100128292 | 0.300827156 mirna_pc |
| 6545 hsa-mir-301a | THYN1        | 0.359121045 mirna_pc |
| 6546 hsa-mir-301a | EDAR         | 0.320390575 mirna_pc |
| 6547 hsa-mir-301a | AMZ2         | 0.329789332 mirna_pc |
| 6548 hsa-mir-301a | EIF2B5       | 0.306385091 mirna_pc |
| 6549 hsa-mir-301a | NUP153       | 0.313960088 mirna_pc |
| 6550 hsa-mir-301a | PARL         | 0.341390097 mirna_pc |
| 6551 hsa-mir-301a | FAM76B       | 0.304982662 mirna_pc |
| 6552 hsa-mir-301a | MRPL28       | 0.318325273 mirna_pc |
| 6553 hsa-mir-301a | C2orf68      | 0.336838013 mirna_pc |
| 6554 hsa-mir-301a | C17orf80     | 0.370899175 mirna_pc |
| 6555 hsa-mir-301a | YWHAQ        | 0.304167614 mirna_pc |
| 6556 hsa-mir-301a | ARHGEF19     | 0.313628209 mirna_pc |
| 6557 hsa-mir-301a | DNAJC8       | 0.347321764 mirna_pc |
| 6558 hsa-mir-301a | APLP2        | 0.338399923 mirna_pc |
| 6559 hsa-mir-301a | C17orf75     | 0.405028255 mirna_pc |
| 6560 hsa-mir-301a | ZBTB44       | 0.340410305 mirna_pc |
| 6561 hsa-mir-301a | EXT2         | 0.326272057 mirna_pc |
| 6562 hsa-mir-301a | IL28RA       | 0.343615009 mirna_pc |
| 6563 hsa-mir-301a | YTHDF2       | 0.383231964 mirna_pc |
| 6564 hsa-mir-301a | MRPL38       | 0.310923305 mirna_pc |
| 6565 hsa-mir-301a | HSPA4        | 0.306747236 mirna_pc |
| 6566 hsa-mir-301a | YBX1         | 0.359757562 mirna_pc |
| 6567 hsa-mir-301a | ATPBD4       | 0.321165965 mirna_pc |
| 6568 hsa-mir-301a | TCTN2        | 0.300307926 mirna_pc |
| 6569 hsa-mir-301a | C14orf104    | 0.301809089 mirna_pc |
| 6570 hsa-mir-301a | ZKSCAN5      | 0.386312716 mirna_pc |
| 6571 hsa-mir-301a | POLR2C       | 0.35828831 mirna_pc  |
| 6572 hsa-mir-301a | EXTL2        | 0.352059332 mirna_pc |
| 6573 hsa-mir-301a | CLEC2B       | 0.401067184 mirna_pc |
| 6574 hsa-mir-301a | C12orf45     | 0.330333133 mirna_pc |
| 6575 hsa-mir-301a | C2orf44      | 0.386575587 mirna_pc |
| 6576 hsa-mir-301a | RING1        | 0.360607463 mirna_pc |
| 6577 hsa-mir-301a | SEPHS1       | 0.350493741 mirna_pc |
| 6578 hsa-mir-301a | POMGNT1      | 0.307495953 mirna_pc |
| 6579 hsa-mir-301a | KDM4D        | 0.33987972 mirna_pc  |
| 6580 hsa-mir-301a | SUB1         | 0.309238523 mirna_pc |
| 6581 hsa-mir-301a | GBAS         | 0.377021274 mirna_pc |
| 6582 hsa-mir-301a | AIP          | 0.341105906 mirna_pc |
| 6583 hsa-mir-301a | BOLA3        | 0.356418557 mirna_pc |
| 6584 hsa-mir-301a | VASH2        | 0.38275194 mirna_pc  |
| 6585 hsa-mir-301a | C19orf23     | 0.424261672 mirna_pc |
| 6586 hsa-mir-301a | MYL6B        | 0.388634636 mirna_pc |
| 6587 hsa-mir-301a | PDCD7        | 0.391259724 mirna_pc |

|                   |          |                      |
|-------------------|----------|----------------------|
| 6588 hsa-mir-301a | ALKBH3   | 0.314844014 mirna_pc |
| 6589 hsa-mir-301a | MED28    | 0.333897444 mirna_pc |
| 6590 hsa-mir-301a | MRPS15   | 0.357981859 mirna_pc |
| 6591 hsa-mir-301a | C17orf58 | 0.415249387 mirna_pc |
| 6592 hsa-mir-301a | NARS2    | 0.378135679 mirna_pc |
| 6593 hsa-mir-301a | ZFP1     | 0.348588927 mirna_pc |
| 6594 hsa-mir-301a | EIF2B3   | 0.325042201 mirna_pc |
| 6595 hsa-mir-301a | LYRM4    | 0.420135824 mirna_pc |
| 6596 hsa-mir-301a | FAM133B  | 0.417556664 mirna_pc |
| 6597 hsa-mir-301a | CHST11   | 0.373968762 mirna_pc |
| 6598 hsa-mir-301a | BCL11A   | 0.381085073 mirna_pc |
| 6599 hsa-mir-301a | C4orf27  | 0.327836353 mirna_pc |
| 6600 hsa-mir-301a | USP21    | 0.358817512 mirna_pc |
| 6601 hsa-mir-301a | SPDYA    | 0.32093246 mirna_pc  |
| 6602 hsa-mir-301a | RBM25    | 0.3093813 mirna_pc   |
| 6603 hsa-mir-301a | CFDP1    | 0.310016557 mirna_pc |
| 6604 hsa-mir-301a | LMAN2L   | 0.307975411 mirna_pc |
| 6605 hsa-mir-301a | C17orf81 | 0.32199276 mirna_pc  |
| 6606 hsa-mir-301a | HYLS1    | 0.358004536 mirna_pc |
| 6607 hsa-mir-301a | C7orf60  | 0.384216386 mirna_pc |
| 6608 hsa-mir-301a | NAP1L1   | 0.332605457 mirna_pc |
| 6609 hsa-mir-301a | C1orf156 | 0.334523816 mirna_pc |
| 6610 hsa-mir-301a | CNIH2    | 0.319617139 mirna_pc |
| 6611 hsa-mir-301a | FLJ37453 | 0.314173748 mirna_pc |
| 6612 hsa-mir-301a | IQCC     | 0.335879076 mirna_pc |
| 6613 hsa-mir-301a | GATAD2B  | 0.341007799 mirna_pc |
| 6614 hsa-mir-301a | HNRNPA0  | 0.367271282 mirna_pc |
| 6615 hsa-mir-301a | MORN2    | 0.393629606 mirna_pc |
| 6616 hsa-mir-301a | SETD6    | 0.317537966 mirna_pc |
| 6617 hsa-mir-301a | RTN4RL1  | 0.367212664 mirna_pc |
| 6618 hsa-mir-301a | MLLT11   | 0.357198862 mirna_pc |
| 6619 hsa-mir-301a | AASDHPPT | 0.314848575 mirna_pc |
| 6620 hsa-mir-301a | CWC15    | 0.327086958 mirna_pc |
| 6621 hsa-mir-301a | MYCN     | 0.318262487 mirna_pc |
| 6622 hsa-mir-301a | FYTDD1   | 0.329672137 mirna_pc |
| 6623 hsa-mir-301a | EFCAB7   | 0.350561543 mirna_pc |
| 6624 hsa-mir-301a | MTERF    | 0.491402503 mirna_pc |
| 6625 hsa-mir-301a | SBK1     | 0.353662942 mirna_pc |
| 6626 hsa-mir-301a | C7orf64  | 0.308897148 mirna_pc |
| 6627 hsa-mir-301a | PMF1     | 0.343665649 mirna_pc |
| 6628 hsa-mir-301a | USP13    | 0.352043018 mirna_pc |
| 6629 hsa-mir-301a | GALNT14  | 0.319969413 mirna_pc |
| 6630 hsa-mir-301a | SLC25A33 | 0.410172378 mirna_pc |
| 6631 hsa-mir-301a | C1orf144 | 0.316105786 mirna_pc |
| 6632 hsa-mir-301a | TMEM18   | 0.360495898 mirna_pc |
| 6633 hsa-mir-301a | ZNF394   | 0.305261065 mirna_pc |
| 6634 hsa-mir-301a | C1orf52  | 0.328898502 mirna_pc |
| 6635 hsa-mir-301a | GTF2H2   | 0.333743677 mirna_pc |
| 6636 hsa-mir-301a | ZNF232   | 0.318966575 mirna_pc |
| 6637 hsa-mir-301a | SNRNP27  | 0.315350966 mirna_pc |
| 6638 hsa-mir-301a | RPAIN    | 0.316215697 mirna_pc |
| 6639 hsa-mir-301a | TERF1    | 0.313210457 mirna_pc |
| 6640 hsa-mir-301a | CCDC90B  | 0.396335312 mirna_pc |
| 6641 hsa-mir-301a | RBBP4    | 0.327318457 mirna_pc |

|                   |           |                      |
|-------------------|-----------|----------------------|
| 6642 hsa-mir-301a | LOC221710 | 0.32299466 mirna_pc  |
| 6643 hsa-mir-301a | GUSBP1    | 0.329446432 mirna_pc |
| 6644 hsa-mir-301a | MRPL1     | 0.368880269 mirna_pc |
| 6645 hsa-mir-301a | KIAA1586  | 0.304321851 mirna_pc |
| 6646 hsa-mir-301a | API5      | 0.350525164 mirna_pc |
| 6647 hsa-mir-301a | USP28     | 0.382944935 mirna_pc |
| 6648 hsa-mir-301a | C2orf3    | 0.381585288 mirna_pc |
| 6649 hsa-mir-301a | CHD4      | 0.320570777 mirna_pc |
| 6650 hsa-mir-301a | KRIT1     | 0.358769321 mirna_pc |
| 6651 hsa-mir-301a | DHRS2     | 0.337943014 mirna_pc |
| 6652 hsa-mir-301a | MEAF6     | 0.34518678 mirna_pc  |
| 6653 hsa-mir-301a | DNAJC19   | 0.302411228 mirna_pc |
| 6654 hsa-mir-301a | TMEM134   | 0.345056589 mirna_pc |
| 6655 hsa-mir-301a | LRDD      | 0.313610729 mirna_pc |
| 6656 hsa-mir-301a | C12orf65  | 0.335615731 mirna_pc |
| 6657 hsa-mir-301a | MRPL19    | 0.320522168 mirna_pc |
| 6658 hsa-mir-301a | HSF2      | 0.370039819 mirna_pc |
| 6659 hsa-mir-301a | ZCCHC11   | 0.312971639 mirna_pc |
| 6660 hsa-mir-301a | CETN3     | 0.46347156 mirna_pc  |
| 6661 hsa-mir-301a | ZCCHC9    | 0.326875787 mirna_pc |
| 6662 hsa-mir-301a | ETV5      | 0.379988644 mirna_pc |
| 6663 hsa-mir-301a | DDX1      | 0.311647705 mirna_pc |
| 6664 hsa-mir-301a | LSM 1.00  | 0.358934183 mirna_pc |
| 6665 hsa-mir-301a | DYNC1I1   | 0.390708395 mirna_pc |
| 6666 hsa-mir-301a | GLI4      | 0.338486268 mirna_pc |
| 6667 hsa-mir-301a | AADAT     | 0.310935204 mirna_pc |
| 6668 hsa-mir-301a | IGHMBP2   | 0.41475503 mirna_pc  |
| 6669 hsa-mir-301a | ACP1      | 0.303012036 mirna_pc |
| 6670 hsa-mir-301a | FDX1L     | 0.351322405 mirna_pc |
| 6671 hsa-mir-301a | ZNF322A   | 0.448879399 mirna_pc |
| 6672 hsa-mir-301a | SERF1A    | 0.402631155 mirna_pc |
| 6673 hsa-mir-301a | SRP19     | 0.332283014 mirna_pc |
| 6674 hsa-mir-301a | PRMT6     | 0.305808132 mirna_pc |
| 6675 hsa-mir-301a | LOC401397 | 0.460950806 mirna_pc |
| 6676 hsa-mir-301a | GPS2      | 0.303606861 mirna_pc |
| 6677 hsa-mir-301a | C21orf119 | 0.311109827 mirna_pc |
| 6678 hsa-mir-301a | PDS5A     | 0.30229991 mirna_pc  |
| 6679 hsa-mir-301a | C2orf28   | 0.348654488 mirna_pc |
| 6680 hsa-mir-301a | H2AFY2    | 0.411200753 mirna_pc |
| 6681 hsa-mir-301a | TRIL      | 0.330745644 mirna_pc |
| 6682 hsa-mir-301a | HIRIP3    | 0.399693367 mirna_pc |
| 6683 hsa-mir-301a | SLC6A15   | 0.406717759 mirna_pc |
| 6684 hsa-mir-301a | MLF 1.00  | 0.315460929 mirna_pc |
| 6685 hsa-mir-301a | SRRM1     | 0.310999877 mirna_pc |
| 6686 hsa-mir-301a | AGA       | 0.321165908 mirna_pc |
| 6687 hsa-mir-301a | TMEM168   | 0.379434669 mirna_pc |
| 6688 hsa-mir-301a | SCHIP1    | 0.301689479 mirna_pc |
| 6689 hsa-mir-301a | CCDC75    | 0.343337607 mirna_pc |
| 6690 hsa-mir-301a | SEMA4C    | 0.328351059 mirna_pc |
| 6691 hsa-mir-301a | EFNB3     | 0.311995787 mirna_pc |
| 6692 hsa-mir-301a | MRPL53    | 0.381476329 mirna_pc |
| 6693 hsa-mir-301a | DNMT3A    | 0.353448958 mirna_pc |
| 6694 hsa-mir-301a | COPS3     | 0.31218047 mirna_pc  |
| 6695 hsa-mir-301a | NDUFS8    | 0.3579602 mirna_pc   |



|                   |            |                      |
|-------------------|------------|----------------------|
| 6696 hsa-mir-301a | ZNF326     | 0.382696665 mirna_pc |
| 6697 hsa-mir-301a | NMRAL1     | 0.304869835 mirna_pc |
| 6698 hsa-mir-483  | MYBL2      | 0.426471448 mirna_pc |
| 6699 hsa-mir-483  | BUB1B      | 0.345732437 mirna_pc |
| 6700 hsa-mir-483  | CDCA5      | 0.336210708 mirna_pc |
| 6701 hsa-mir-483  | ZNF568     | 0.308199486 mirna_pc |
| 6702 hsa-mir-483  | RECQL4     | 0.340562426 mirna_pc |
| 6703 hsa-mir-483  | PSMA7      | 0.352356551 mirna_pc |
| 6704 hsa-mir-483  | ADRM1      | 0.356683751 mirna_pc |
| 6705 hsa-mir-483  | ILF2       | 0.329447053 mirna_pc |
| 6706 hsa-mir-483  | CDCA7      | 0.335395398 mirna_pc |
| 6707 hsa-mir-483  | SESN1      | 0.312347163 mirna_pc |
| 6708 hsa-mir-483  | ASB1       | 0.314773221 mirna_pc |
| 6709 hsa-mir-483  | SNTB1      | 0.316436241 mirna_pc |
| 6710 hsa-mir-483  | RTKN       | 0.336185786 mirna_pc |
| 6711 hsa-mir-483  | TH1L       | 0.344205416 mirna_pc |
| 6712 hsa-mir-483  | SMOC2      | 0.36934101 mirna_pc  |
| 6713 hsa-mir-483  | CCT3       | 0.418262001 mirna_pc |
| 6714 hsa-mir-483  | CSE1L      | 0.315246695 mirna_pc |
| 6715 hsa-mir-483  | SLC7A2     | 0.355486832 mirna_pc |
| 6716 hsa-mir-483  | TOMM40     | 0.320294537 mirna_pc |
| 6717 hsa-mir-483  | CDC25A     | 0.404244769 mirna_pc |
| 6718 hsa-mir-483  | SRPK1      | 0.468960626 mirna_pc |
| 6719 hsa-mir-483  | CHRM3      | 0.30215241 mirna_pc  |
| 6720 hsa-mir-483  | CYB561D1   | 0.382951686 mirna_pc |
| 6721 hsa-mir-483  | KCNIP3     | 0.36814677 mirna_pc  |
| 6722 hsa-mir-483  | HSPD1      | 0.419475399 mirna_pc |
| 6723 hsa-mir-483  | SLC5A6     | 0.34748139 mirna_pc  |
| 6724 hsa-mir-483  | TOMM34     | 0.425959988 mirna_pc |
| 6725 hsa-mir-483  | GGH        | 0.359407832 mirna_pc |
| 6726 hsa-mir-483  | ZNF695     | 0.371057156 mirna_pc |
| 6727 hsa-mir-483  | SCARB1     | 0.396777322 mirna_pc |
| 6728 hsa-mir-483  | RQCD1      | 0.339516803 mirna_pc |
| 6729 hsa-mir-483  | MTCH2      | 0.301265734 mirna_pc |
| 6730 hsa-mir-483  | NUP160     | 0.3258742 mirna_pc   |
| 6731 hsa-mir-483  | RPS21      | 0.449178326 mirna_pc |
| 6732 hsa-mir-483  | SLC1A5     | 0.333648371 mirna_pc |
| 6733 hsa-mir-483  | ADAMTS14   | 0.367401411 mirna_pc |
| 6734 hsa-mir-483  | TBC1D4     | 0.321946884 mirna_pc |
| 6735 hsa-mir-483  | AMIGO1     | 0.314303119 mirna_pc |
| 6736 hsa-mir-483  | AMPD2      | 0.346935782 mirna_pc |
| 6737 hsa-mir-483  | LSM14B     | 0.329893386 mirna_pc |
| 6738 hsa-mir-483  | L1CAM      | 0.572429596 mirna_pc |
| 6739 hsa-mir-483  | NCRNA00176 | 0.632069829 mirna_pc |
| 6740 hsa-mir-483  | FAM125B    | 0.344602598 mirna_pc |
| 6741 hsa-mir-483  | EPHB2      | 0.438276768 mirna_pc |
| 6742 hsa-mir-483  | ASCL2      | 0.327549532 mirna_pc |
| 6743 hsa-mir-483  | HAUS2      | 0.340176147 mirna_pc |
| 6744 hsa-mir-483  | HDAC11     | 0.534928969 mirna_pc |
| 6745 hsa-mir-483  | PPAN       | 0.342912867 mirna_pc |
| 6746 hsa-mir-483  | PDCD11     | 0.324576168 mirna_pc |
| 6747 hsa-mir-483  | ZNF703     | 0.406953807 mirna_pc |
| 6748 hsa-mir-483  | GYLTL1B    | 0.407897088 mirna_pc |
| 6749 hsa-mir-483  | MAN2A2     | 0.314538422 mirna_pc |

|                  |          |                      |
|------------------|----------|----------------------|
| 6750 hsa-mir-483 | HDAC4    | 0.379504214 mirna_pc |
| 6751 hsa-mir-483 | PCBP4    | 0.315078554 mirna_pc |
| 6752 hsa-mir-483 | NPHP4    | 0.609639592 mirna_pc |
| 6753 hsa-mir-483 | ZNF350   | 0.422286332 mirna_pc |
| 6754 hsa-mir-483 | C2       | 0.315448911 mirna_pc |
| 6755 hsa-mir-483 | BAMBI    | 0.321704474 mirna_pc |
| 6756 hsa-mir-483 | EEF1A1P9 | 0.308652912 mirna_pc |
| 6757 hsa-mir-483 | TLR9     | 0.386523239 mirna_pc |
| 6758 hsa-mir-483 | PTGES2   | 0.306040788 mirna_pc |
| 6759 hsa-mir-483 | FGFRL1   | 0.381376329 mirna_pc |
| 6760 hsa-mir-483 | PUSL1    | 0.355731582 mirna_pc |
| 6761 hsa-mir-483 | NKD2     | 0.328206537 mirna_pc |
| 6762 hsa-mir-483 | ZSCAN5A  | 0.491735943 mirna_pc |
| 6763 hsa-mir-483 | KCTD17   | 0.467425241 mirna_pc |
| 6764 hsa-mir-483 | AGAP1    | 0.307102584 mirna_pc |
| 6765 hsa-mir-483 | GDPD5    | 0.311454443 mirna_pc |
| 6766 hsa-mir-483 | ADAMTS17 | 0.332726196 mirna_pc |
| 6767 hsa-mir-483 | LRPPRC   | 0.387725275 mirna_pc |
| 6768 hsa-mir-483 | GPC4     | 0.381731249 mirna_pc |
| 6769 hsa-mir-483 | ARNT2    | 0.379353379 mirna_pc |
| 6770 hsa-mir-483 | MME      | 0.416416193 mirna_pc |
| 6771 hsa-mir-483 | PTP4A3   | 0.340358054 mirna_pc |
| 6772 hsa-mir-483 | LCK      | 0.313262233 mirna_pc |
| 6773 hsa-mir-483 | USP37    | 0.333632225 mirna_pc |
| 6774 hsa-mir-483 | ILKAP    | 0.322824095 mirna_pc |
| 6775 hsa-mir-483 | PPP4R1L  | 0.328948534 mirna_pc |
| 6776 hsa-mir-483 | CTNNB1   | 0.413076769 mirna_pc |
| 6777 hsa-mir-483 | JPH1     | 0.343870777 mirna_pc |
| 6778 hsa-mir-483 | ZNF486   | 0.34969601 mirna_pc  |
| 6779 hsa-mir-483 | DDX20    | 0.331505045 mirna_pc |
| 6780 hsa-mir-483 | FGGY     | 0.52007784 mirna_pc  |
| 6781 hsa-mir-483 | SLC25A10 | 0.345875656 mirna_pc |
| 6782 hsa-mir-483 | DEPDC7   | 0.368027891 mirna_pc |
| 6783 hsa-mir-483 | EHD4     | 0.349147022 mirna_pc |
| 6784 hsa-mir-483 | C2orf89  | 0.401306643 mirna_pc |
| 6785 hsa-mir-483 | GGA1     | 0.323048519 mirna_pc |
| 6786 hsa-mir-483 | SLC29A2  | 0.317188844 mirna_pc |
| 6787 hsa-mir-483 | GTPBP5   | 0.372287482 mirna_pc |
| 6788 hsa-mir-483 | BIN1     | 0.393609227 mirna_pc |
| 6789 hsa-mir-483 | CABLES2  | 0.311685305 mirna_pc |
| 6790 hsa-mir-483 | RPS16    | 0.358878258 mirna_pc |
| 6791 hsa-mir-483 | SYMPK    | 0.471762647 mirna_pc |
| 6792 hsa-mir-483 | BEND3    | 0.300182394 mirna_pc |
| 6793 hsa-mir-483 | PLEKHB1  | 0.324061729 mirna_pc |
| 6794 hsa-mir-483 | TRAF5    | 0.353025073 mirna_pc |
| 6795 hsa-mir-483 | NKD1     | 0.395498714 mirna_pc |
| 6796 hsa-mir-483 | KLHL25   | 0.516074996 mirna_pc |
| 6797 hsa-mir-483 | RBM38    | 0.502079637 mirna_pc |
| 6798 hsa-mir-483 | IRF2BP1  | 0.345259412 mirna_pc |
| 6799 hsa-mir-483 | ARL 2.00 | 0.303521152 mirna_pc |
| 6800 hsa-mir-483 | NAALADL1 | 0.417448902 mirna_pc |
| 6801 hsa-mir-483 | NUP210   | 0.451319066 mirna_pc |
| 6802 hsa-mir-483 | ACTR3C   | 0.339316792 mirna_pc |
| 6803 hsa-mir-483 | FYN      | 0.363132575 mirna_pc |

|                  |           |                      |
|------------------|-----------|----------------------|
| 6804 hsa-mir-483 | RPL14     | 0.315134951 mirna_pc |
| 6805 hsa-mir-483 | LMO2      | 0.377880124 mirna_pc |
| 6806 hsa-mir-483 | UCP2      | 0.323465769 mirna_pc |
| 6807 hsa-mir-483 | PIGT      | 0.409348939 mirna_pc |
| 6808 hsa-mir-483 | PVR       | 0.303387848 mirna_pc |
| 6809 hsa-mir-483 | NT5E      | 0.350394068 mirna_pc |
| 6810 hsa-mir-483 | MMACHC    | 0.328071388 mirna_pc |
| 6811 hsa-mir-483 | HES6      | 0.325846593 mirna_pc |
| 6812 hsa-mir-483 | LGR5      | 0.593037782 mirna_pc |
| 6813 hsa-mir-483 | SAMD4B    | 0.351140371 mirna_pc |
| 6814 hsa-mir-483 | REPIN1    | 0.351819417 mirna_pc |
| 6815 hsa-mir-483 | ATAD1     | 0.342824052 mirna_pc |
| 6816 hsa-mir-483 | VIL1      | 0.552392565 mirna_pc |
| 6817 hsa-mir-483 | CDC34     | 0.354157068 mirna_pc |
| 6818 hsa-mir-483 | LOC148189 | 0.36701903 mirna_pc  |
| 6819 hsa-mir-483 | SMARCC1   | 0.319541762 mirna_pc |
| 6820 hsa-mir-483 | ACOT9     | 0.472404815 mirna_pc |
| 6821 hsa-mir-483 | DMWD      | 0.560287914 mirna_pc |
| 6822 hsa-mir-483 | RGPD5     | 0.368961187 mirna_pc |
| 6823 hsa-mir-483 | CST7      | 0.533885748 mirna_pc |
| 6824 hsa-mir-483 | ZNF142    | 0.386476632 mirna_pc |
| 6825 hsa-mir-483 | DUS1L     | 0.30030875 mirna_pc  |
| 6826 hsa-mir-483 | RAC3      | 0.537150936 mirna_pc |
| 6827 hsa-mir-483 | RPS12     | 0.340233531 mirna_pc |
| 6828 hsa-mir-483 | ATG2A     | 0.3834696 mirna_pc   |
| 6829 hsa-mir-483 | RPL4      | 0.3420181 mirna_pc   |
| 6830 hsa-mir-483 | GOLT1A    | 0.394242095 mirna_pc |
| 6831 hsa-mir-483 | RPSAP58   | 0.308023305 mirna_pc |
| 6832 hsa-mir-483 | UBA3      | 0.331984124 mirna_pc |
| 6833 hsa-mir-483 | KIAA1274  | 0.547988799 mirna_pc |
| 6834 hsa-mir-483 | PROX1     | 0.502694861 mirna_pc |
| 6835 hsa-mir-483 | STX3      | 0.37742455 mirna_pc  |
| 6836 hsa-mir-483 | GNG4      | 0.33858652 mirna_pc  |
| 6837 hsa-mir-483 | SPTBN5    | 0.461008348 mirna_pc |
| 6838 hsa-mir-483 | IL17RB    | 0.424262702 mirna_pc |
| 6839 hsa-mir-483 | EIF3J     | 0.322454005 mirna_pc |
| 6840 hsa-mir-483 | RPSA      | 0.332484036 mirna_pc |
| 6841 hsa-mir-483 | FASN      | 0.398383309 mirna_pc |
| 6842 hsa-mir-483 | PRDX4     | 0.303143073 mirna_pc |
| 6843 hsa-mir-483 | IGF2      | 0.979805152 mirna_pc |
| 6844 hsa-mir-483 | NES       | 0.404061479 mirna_pc |
| 6845 hsa-mir-483 | DNAJA4    | 0.383445333 mirna_pc |
| 6846 hsa-mir-483 | DBNDD2    | 0.335411164 mirna_pc |
| 6847 hsa-mir-483 | INHBB     | 0.525578123 mirna_pc |
| 6848 hsa-mir-483 | APOO      | 0.385767634 mirna_pc |
| 6849 hsa-mir-483 | CD46      | 0.336215575 mirna_pc |
| 6850 hsa-mir-483 | ZNF90     | 0.435188694 mirna_pc |
| 6851 hsa-mir-483 | SLC2A8    | 0.331814871 mirna_pc |
| 6852 hsa-mir-483 | ANKRD52   | 0.315999511 mirna_pc |
| 6853 hsa-mir-99b | HIF3A     | 0.358435022 mirna_pc |
| 6854 hsa-mir-99b | ZNF415    | 0.409894914 mirna_pc |
| 6855 hsa-mir-99b | KIF2C     | 0.360660018 mirna_pc |
| 6856 hsa-mir-99b | NCAPG     | 0.363064622 mirna_pc |
| 6857 hsa-mir-99b | CCNA2     | 0.329531232 mirna_pc |

|                  |          |                      |
|------------------|----------|----------------------|
| 6858 hsa-mir-99b | NUP62    | 0.307499593 mirna_pc |
| 6859 hsa-mir-99b | MND1     | 0.39076202 mirna_pc  |
| 6860 hsa-mir-99b | RAD54L   | 0.34738688 mirna_pc  |
| 6861 hsa-mir-99b | MAD2L1   | 0.363592378 mirna_pc |
| 6862 hsa-mir-99b | TIMELESS | 0.407075346 mirna_pc |
| 6863 hsa-mir-99b | TROAP    | 0.314047821 mirna_pc |
| 6864 hsa-mir-99b | ZNF470   | 0.322690084 mirna_pc |
| 6865 hsa-mir-99b | TACC3    | 0.374803528 mirna_pc |
| 6866 hsa-mir-99b | MYEF2    | 0.317037633 mirna_pc |
| 6867 hsa-mir-99b | XPO1     | 0.334233812 mirna_pc |
| 6868 hsa-mir-99b | STMN1    | 0.318506346 mirna_pc |
| 6869 hsa-mir-99b | ZNF542   | 0.446344602 mirna_pc |
| 6870 hsa-mir-99b | TUBB     | 0.373572594 mirna_pc |
| 6871 hsa-mir-99b | KNTC1    | 0.330691822 mirna_pc |
| 6872 hsa-mir-99b | PLK4     | 0.359333056 mirna_pc |
| 6873 hsa-mir-99b | ZNF568   | 0.306324049 mirna_pc |
| 6874 hsa-mir-99b | LIG1     | 0.302642266 mirna_pc |
| 6875 hsa-mir-99b | Clorf112 | 0.348916337 mirna_pc |
| 6876 hsa-mir-99b | APBB1    | 0.307284483 mirna_pc |
| 6877 hsa-mir-99b | KIAA0495 | 0.320397298 mirna_pc |
| 6878 hsa-mir-99b | RAE1     | 0.319076589 mirna_pc |
| 6879 hsa-mir-99b | NEIL3    | 0.438727539 mirna_pc |
| 6880 hsa-mir-99b | POLD1    | 0.444093073 mirna_pc |
| 6881 hsa-mir-99b | ZNF229   | 0.403711064 mirna_pc |
| 6882 hsa-mir-99b | ZNF528   | 0.357301247 mirna_pc |
| 6883 hsa-mir-99b | TUBA1B   | 0.300521935 mirna_pc |
| 6884 hsa-mir-99b | MCM6     | 0.324268573 mirna_pc |
| 6885 hsa-mir-99b | TMEM25   | 0.304958691 mirna_pc |
| 6886 hsa-mir-99b | NFKBIL2  | 0.360968039 mirna_pc |
| 6887 hsa-mir-99b | FUS      | 0.303722663 mirna_pc |
| 6888 hsa-mir-99b | CENPO    | 0.372464832 mirna_pc |
| 6889 hsa-mir-99b | C19orf48 | 0.302662291 mirna_pc |
| 6890 hsa-mir-99b | HMGB2    | 0.33076983 mirna_pc  |
| 6891 hsa-mir-99b | CDKN1C   | 0.4129528 mirna_pc   |
| 6892 hsa-mir-99b | C5       | 0.407255128 mirna_pc |
| 6893 hsa-mir-99b | PRMT1    | 0.310840514 mirna_pc |
| 6894 hsa-mir-99b | CAD      | 0.335376756 mirna_pc |
| 6895 hsa-mir-99b | ZNF331   | 0.318764314 mirna_pc |
| 6896 hsa-mir-99b | CDK2     | 0.412995035 mirna_pc |
| 6897 hsa-mir-99b | CDK4     | 0.366654065 mirna_pc |
| 6898 hsa-mir-99b | GPRASP2  | 0.333229958 mirna_pc |
| 6899 hsa-mir-99b | PRIM1    | 0.379212636 mirna_pc |
| 6900 hsa-mir-99b | CAND2    | 0.31340464 mirna_pc  |
| 6901 hsa-mir-99b | MSH2     | 0.41442068 mirna_pc  |
| 6902 hsa-mir-99b | SALL4    | 0.410158832 mirna_pc |
| 6903 hsa-mir-99b | SF3B3    | 0.323260317 mirna_pc |
| 6904 hsa-mir-99b | CDC7     | 0.309418642 mirna_pc |
| 6905 hsa-mir-99b | ZNF439   | 0.317575107 mirna_pc |
| 6906 hsa-mir-99b | ZNF853   | 0.404562246 mirna_pc |
| 6907 hsa-mir-99b | FBX05    | 0.319749131 mirna_pc |
| 6908 hsa-mir-99b | MDK      | 0.300871188 mirna_pc |
| 6909 hsa-mir-99b | H2AFZ    | 0.347630329 mirna_pc |
| 6910 hsa-mir-99b | ZNF649   | 0.370111513 mirna_pc |
| 6911 hsa-mir-99b | CCDC106  | 0.364771121 mirna_pc |

|                  |              |                      |
|------------------|--------------|----------------------|
| 6912 hsa-mir-99b | GNPDA1       | 0.343857687 mirna_pc |
| 6913 hsa-mir-99b | TMEM201      | 0.344401362 mirna_pc |
| 6914 hsa-mir-99b | PSRC1        | 0.355966446 mirna_pc |
| 6915 hsa-mir-99b | MEGF8        | 0.403179793 mirna_pc |
| 6916 hsa-mir-99b | ZNF329       | 0.38024864 mirna_pc  |
| 6917 hsa-mir-99b | MPP2         | 0.347079097 mirna_pc |
| 6918 hsa-mir-99b | GPR19        | 0.394177929 mirna_pc |
| 6919 hsa-mir-99b | ZNF175       | 0.381129669 mirna_pc |
| 6920 hsa-mir-99b | PPAT         | 0.346615901 mirna_pc |
| 6921 hsa-mir-99b | LOC100128191 | 0.461102113 mirna_pc |
| 6922 hsa-mir-99b | C20orf3      | 0.321523409 mirna_pc |
| 6923 hsa-mir-99b | CDH24        | 0.3259382 mirna_pc   |
| 6924 hsa-mir-99b | SKP2         | 0.306024001 mirna_pc |
| 6925 hsa-mir-99b | SMARCD1      | 0.349602343 mirna_pc |
| 6926 hsa-mir-99b | C4orf46      | 0.40111648 mirna_pc  |
| 6927 hsa-mir-99b | FZD2         | 0.433865737 mirna_pc |
| 6928 hsa-mir-99b | TBC1D17      | 0.34657456 mirna_pc  |
| 6929 hsa-mir-99b | POLR2D       | 0.352843104 mirna_pc |
| 6930 hsa-mir-99b | FTSJ2        | 0.314588013 mirna_pc |
| 6931 hsa-mir-99b | KHDRBS1      | 0.30878858 mirna_pc  |
| 6932 hsa-mir-99b | TUB          | 0.35790254 mirna_pc  |
| 6933 hsa-mir-99b | MTL 5.00     | 0.389789107 mirna_pc |
| 6934 hsa-mir-99b | SARDH        | 0.306792381 mirna_pc |
| 6935 hsa-mir-99b | TMEM194A     | 0.396663526 mirna_pc |
| 6936 hsa-mir-99b | SLC39A10     | 0.394186848 mirna_pc |
| 6937 hsa-mir-99b | NASP         | 0.380383291 mirna_pc |
| 6938 hsa-mir-99b | LOC100130093 | 0.382749028 mirna_pc |
| 6939 hsa-mir-99b | SCARB1       | 0.36026602 mirna_pc  |
| 6940 hsa-mir-99b | LARP6        | 0.30672181 mirna_pc  |
| 6941 hsa-mir-99b | HIST1H2BK    | 0.303040731 mirna_pc |
| 6942 hsa-mir-99b | HOXA9        | 0.344681795 mirna_pc |
| 6943 hsa-mir-99b | HNRNPD       | 0.312387662 mirna_pc |
| 6944 hsa-mir-99b | WDR19        | 0.332533917 mirna_pc |
| 6945 hsa-mir-99b | TFR2         | 0.347548688 mirna_pc |
| 6946 hsa-mir-99b | PHC1         | 0.368363077 mirna_pc |
| 6947 hsa-mir-99b | LTBP3        | 0.303364477 mirna_pc |
| 6948 hsa-mir-99b | APOE         | 0.360845414 mirna_pc |
| 6949 hsa-mir-99b | DUSP9        | 0.546822569 mirna_pc |
| 6950 hsa-mir-99b | ULK2         | 0.316890947 mirna_pc |
| 6951 hsa-mir-99b | KIAA0406     | 0.31116967 mirna_pc  |
| 6952 hsa-mir-99b | MOV10        | 0.400069102 mirna_pc |
| 6953 hsa-mir-99b | USP22        | 0.310425763 mirna_pc |
| 6954 hsa-mir-99b | C4orf41      | 0.314475054 mirna_pc |
| 6955 hsa-mir-99b | FAM168B      | 0.304687003 mirna_pc |
| 6956 hsa-mir-99b | ZNF615       | 0.328759665 mirna_pc |
| 6957 hsa-mir-99b | KPTN         | 0.401270563 mirna_pc |
| 6958 hsa-mir-99b | ZNF221       | 0.382101146 mirna_pc |
| 6959 hsa-mir-99b | EHMT2        | 0.310725051 mirna_pc |
| 6960 hsa-mir-99b | UBAP2L       | 0.360175464 mirna_pc |
| 6961 hsa-mir-99b | MEIS2        | 0.309687398 mirna_pc |
| 6962 hsa-mir-99b | PRAME        | 0.59760461 mirna_pc  |
| 6963 hsa-mir-99b | FBXW8        | 0.316580337 mirna_pc |
| 6964 hsa-mir-99b | AZI1         | 0.323993113 mirna_pc |
| 6965 hsa-mir-99b | IPO9         | 0.3831152 mirna_pc   |

|                  |          |                      |
|------------------|----------|----------------------|
| 6966 hsa-mir-99b | SART3    | 0.35407017 mirna_pc  |
| 6967 hsa-mir-99b | ZNF549   | 0.328658279 mirna_pc |
| 6968 hsa-mir-99b | CSRP2BP  | 0.337110748 mirna_pc |
| 6969 hsa-mir-99b | RBPJ     | 0.312035416 mirna_pc |
| 6970 hsa-mir-99b | ZNF704   | 0.304726163 mirna_pc |
| 6971 hsa-mir-99b | GAR1     | 0.35335044 mirna_pc  |
| 6972 hsa-mir-99b | CPXM1    | 0.321403335 mirna_pc |
| 6973 hsa-mir-99b | WHSC1    | 0.373764966 mirna_pc |
| 6974 hsa-mir-99b | ZNF134   | 0.453765139 mirna_pc |
| 6975 hsa-mir-99b | SAE1     | 0.524282978 mirna_pc |
| 6976 hsa-mir-99b | C19orf47 | 0.303912248 mirna_pc |
| 6977 hsa-mir-99b | C4orf43  | 0.354182353 mirna_pc |
| 6978 hsa-mir-99b | RAD51L3  | 0.423345317 mirna_pc |
| 6979 hsa-mir-99b | METTL14  | 0.394096131 mirna_pc |
| 6980 hsa-mir-99b | PLEKHG4  | 0.322146086 mirna_pc |
| 6981 hsa-mir-99b | CNOT3    | 0.310532224 mirna_pc |
| 6982 hsa-mir-99b | CD83     | 0.371303412 mirna_pc |
| 6983 hsa-mir-99b | ZNF788   | 0.379220207 mirna_pc |
| 6984 hsa-mir-99b | ITIH4    | 0.35620396 mirna_pc  |
| 6985 hsa-mir-99b | AS3MT    | 0.321442497 mirna_pc |
| 6986 hsa-mir-99b | CADM1    | 0.46516525 mirna_pc  |
| 6987 hsa-mir-99b | CPAMD8   | 0.331838485 mirna_pc |
| 6988 hsa-mir-99b | SALL2    | 0.522596221 mirna_pc |
| 6989 hsa-mir-99b | SLC39A1  | 0.349236382 mirna_pc |
| 6990 hsa-mir-99b | MSH6     | 0.403544504 mirna_pc |
| 6991 hsa-mir-99b | LEF1     | 0.333178087 mirna_pc |
| 6992 hsa-mir-99b | FAM161A  | 0.328569346 mirna_pc |
| 6993 hsa-mir-99b | FAM193A  | 0.345945731 mirna_pc |
| 6994 hsa-mir-99b | KREMEN2  | 0.376938901 mirna_pc |
| 6995 hsa-mir-99b | ZNF606   | 0.390633211 mirna_pc |
| 6996 hsa-mir-99b | SMARCA1  | 0.564800671 mirna_pc |
| 6997 hsa-mir-99b | GPAM     | 0.431722088 mirna_pc |
| 6998 hsa-mir-99b | MCM3AP   | 0.326826946 mirna_pc |
| 6999 hsa-mir-99b | OSBPL9   | 0.355610222 mirna_pc |
| 7000 hsa-mir-99b | MEX3A    | 0.461104759 mirna_pc |
| 7001 hsa-mir-99b | SDC2     | 0.334209033 mirna_pc |
| 7002 hsa-mir-99b | PDCD11   | 0.301254362 mirna_pc |
| 7003 hsa-mir-99b | TRIM28   | 0.322098829 mirna_pc |
| 7004 hsa-mir-99b | TIFA     | 0.31237345 mirna_pc  |
| 7005 hsa-mir-99b | ZNF444   | 0.336114347 mirna_pc |
| 7006 hsa-mir-99b | CCDC28B  | 0.343260018 mirna_pc |
| 7007 hsa-mir-99b | UNC119B  | 0.352969841 mirna_pc |
| 7008 hsa-mir-99b | CBX1     | 0.32740509 mirna_pc  |
| 7009 hsa-mir-99b | ZNF160   | 0.357874241 mirna_pc |
| 7010 hsa-mir-99b | EVC      | 0.30527551 mirna_pc  |
| 7011 hsa-mir-99b | ZBTB12   | 0.365823755 mirna_pc |
| 7012 hsa-mir-99b | TGIF2    | 0.404605262 mirna_pc |
| 7013 hsa-mir-99b | SLC26A1  | 0.306132328 mirna_pc |
| 7014 hsa-mir-99b | PRPF31   | 0.373818999 mirna_pc |
| 7015 hsa-mir-99b | SENP1    | 0.318483933 mirna_pc |
| 7016 hsa-mir-99b | RCN2     | 0.340718657 mirna_pc |
| 7017 hsa-mir-99b | TARBP2   | 0.319619422 mirna_pc |
| 7018 hsa-mir-99b | POU6F2   | 0.3298693 mirna_pc   |
| 7019 hsa-mir-99b | ZNF256   | 0.378406411 mirna_pc |

|                  |           |                      |
|------------------|-----------|----------------------|
| 7020 hsa-mir-99b | C11orf74  | 0.328554441 mirna_pc |
| 7021 hsa-mir-99b | USP30     | 0.343507309 mirna_pc |
| 7022 hsa-mir-99b | POLE      | 0.337198792 mirna_pc |
| 7023 hsa-mir-99b | ZKSCAN2   | 0.491928778 mirna_pc |
| 7024 hsa-mir-99b | ZDBF2     | 0.334857443 mirna_pc |
| 7025 hsa-mir-99b | ERF       | 0.478386105 mirna_pc |
| 7026 hsa-mir-99b | RTN4RL2   | 0.333586884 mirna_pc |
| 7027 hsa-mir-99b | EXOSC9    | 0.317070795 mirna_pc |
| 7028 hsa-mir-99b | UNG       | 0.344168023 mirna_pc |
| 7029 hsa-mir-99b | RBMX      | 0.305061187 mirna_pc |
| 7030 hsa-mir-99b | OBSL1     | 0.409507382 mirna_pc |
| 7031 hsa-mir-99b | GPC3      | 0.512313512 mirna_pc |
| 7032 hsa-mir-99b | QPCTL     | 0.324285753 mirna_pc |
| 7033 hsa-mir-99b | KIAA1614  | 0.382206019 mirna_pc |
| 7034 hsa-mir-99b | SNX25     | 0.326714977 mirna_pc |
| 7035 hsa-mir-99b | MORN4     | 0.333740333 mirna_pc |
| 7036 hsa-mir-99b | GPN3      | 0.329510564 mirna_pc |
| 7037 hsa-mir-99b | ASB3      | 0.326707679 mirna_pc |
| 7038 hsa-mir-99b | IGSF9     | 0.330336033 mirna_pc |
| 7039 hsa-mir-99b | LOC440905 | 0.316823651 mirna_pc |
| 7040 hsa-mir-99b | DNAJC14   | 0.302326633 mirna_pc |
| 7041 hsa-mir-99b | GTF3C3    | 0.325634822 mirna_pc |
| 7042 hsa-mir-99b | KDM2B     | 0.359769264 mirna_pc |
| 7043 hsa-mir-99b | NAT14     | 0.384955427 mirna_pc |
| 7044 hsa-mir-99b | KIAA1310  | 0.344992898 mirna_pc |
| 7045 hsa-mir-99b | LYPD1     | 0.429125027 mirna_pc |
| 7046 hsa-mir-99b | SOX12     | 0.401915035 mirna_pc |
| 7047 hsa-mir-99b | ZNF234    | 0.315498284 mirna_pc |
| 7048 hsa-mir-99b | ZNF230    | 0.380433925 mirna_pc |
| 7049 hsa-mir-99b | ITPRIPL1  | 0.355960424 mirna_pc |
| 7050 hsa-mir-99b | DMAP1     | 0.301077928 mirna_pc |
| 7051 hsa-mir-99b | C12orf76  | 0.323350451 mirna_pc |
| 7052 hsa-mir-99b | BBS5      | 0.303375809 mirna_pc |
| 7053 hsa-mir-99b | C20orf177 | 0.375870831 mirna_pc |
| 7054 hsa-mir-99b | ATXN7L2   | 0.336254544 mirna_pc |
| 7055 hsa-mir-99b | ZNF813    | 0.369915204 mirna_pc |
| 7056 hsa-mir-99b | RFC1      | 0.386207797 mirna_pc |
| 7057 hsa-mir-99b | POTEF     | 0.340696621 mirna_pc |
| 7058 hsa-mir-99b | ANKRD6    | 0.440827684 mirna_pc |
| 7059 hsa-mir-99b | KIAA0090  | 0.356284426 mirna_pc |
| 7060 hsa-mir-99b | BCL7A     | 0.478144529 mirna_pc |
| 7061 hsa-mir-99b | RNFT2     | 0.322158792 mirna_pc |
| 7062 hsa-mir-99b | LAMA1     | 0.401546222 mirna_pc |
| 7063 hsa-mir-99b | DVL2      | 0.301792391 mirna_pc |
| 7064 hsa-mir-99b | C7orf44   | 0.32942203 mirna_pc  |
| 7065 hsa-mir-99b | TRPA1     | 0.302834816 mirna_pc |
| 7066 hsa-mir-99b | ZBTB49    | 0.334657891 mirna_pc |
| 7067 hsa-mir-99b | TMEM98    | 0.309509579 mirna_pc |
| 7068 hsa-mir-99b | ZNF286A   | 0.382783146 mirna_pc |
| 7069 hsa-mir-99b | FAM171A2  | 0.369292866 mirna_pc |
| 7070 hsa-mir-99b | KCNC3     | 0.357759061 mirna_pc |
| 7071 hsa-mir-99b | KIAA0922  | 0.319922394 mirna_pc |
| 7072 hsa-mir-99b | MRPL21    | 0.300675089 mirna_pc |
| 7073 hsa-mir-99b | RASSF8    | 0.3058479 mirna_pc   |

|                  |           |                      |
|------------------|-----------|----------------------|
| 7074 hsa-mir-99b | MINPP1    | 0.301049383 mirna_pc |
| 7075 hsa-mir-99b | ZNF362    | 0.403258568 mirna_pc |
| 7076 hsa-mir-99b | CHST10    | 0.34021738 mirna_pc  |
| 7077 hsa-mir-99b | TTN       | 0.303054668 mirna_pc |
| 7078 hsa-mir-99b | TBX5      | 0.356208704 mirna_pc |
| 7079 hsa-mir-99b | EVC2      | 0.41033298 mirna_pc  |
| 7080 hsa-mir-99b | LZTS2     | 0.329851168 mirna_pc |
| 7081 hsa-mir-99b | PRR3      | 0.425754652 mirna_pc |
| 7082 hsa-mir-99b | CIC       | 0.368366854 mirna_pc |
| 7083 hsa-mir-99b | SEMA4F    | 0.397654342 mirna_pc |
| 7084 hsa-mir-99b | CHD3      | 0.313382776 mirna_pc |
| 7085 hsa-mir-99b | ZNF286B   | 0.347114019 mirna_pc |
| 7086 hsa-mir-99b | DDX20     | 0.341850989 mirna_pc |
| 7087 hsa-mir-99b | ZDHHC17   | 0.315701572 mirna_pc |
| 7088 hsa-mir-99b | ZNF599    | 0.329804453 mirna_pc |
| 7089 hsa-mir-99b | FKRP      | 0.433595949 mirna_pc |
| 7090 hsa-mir-99b | GPR3      | 0.33644462 mirna_pc  |
| 7091 hsa-mir-99b | E2F6      | 0.454128305 mirna_pc |
| 7092 hsa-mir-99b | ZNF833    | 0.33524865 mirna_pc  |
| 7093 hsa-mir-99b | ZNF222    | 0.460177521 mirna_pc |
| 7094 hsa-mir-99b | HUNK      | 0.566296382 mirna_pc |
| 7095 hsa-mir-99b | SCLY      | 0.316593752 mirna_pc |
| 7096 hsa-mir-99b | GPR125    | 0.512688857 mirna_pc |
| 7097 hsa-mir-99b | FIZ1      | 0.386849021 mirna_pc |
| 7098 hsa-mir-99b | LAMA5     | 0.318916414 mirna_pc |
| 7099 hsa-mir-99b | TFAM      | 0.329756286 mirna_pc |
| 7100 hsa-mir-99b | ADH5      | 0.316383793 mirna_pc |
| 7101 hsa-mir-99b | LDLRAD3   | 0.307317917 mirna_pc |
| 7102 hsa-mir-99b | TTC27     | 0.306348177 mirna_pc |
| 7103 hsa-mir-99b | HOXA5     | 0.326041028 mirna_pc |
| 7104 hsa-mir-99b | DHRS13    | 0.430625469 mirna_pc |
| 7105 hsa-mir-99b | SLC9A5    | 0.344605919 mirna_pc |
| 7106 hsa-mir-99b | LOC222699 | 0.407290011 mirna_pc |
| 7107 hsa-mir-99b | DHX57     | 0.391194551 mirna_pc |
| 7108 hsa-mir-99b | ALX3      | 0.396310662 mirna_pc |
| 7109 hsa-mir-99b | CHST14    | 0.381475589 mirna_pc |
| 7110 hsa-mir-99b | CLSTN3    | 0.394063707 mirna_pc |
| 7111 hsa-mir-99b | ACVR2B    | 0.44145606 mirna_pc  |
| 7112 hsa-mir-99b | NLGN4X    | 0.40086175 mirna_pc  |
| 7113 hsa-mir-99b | SATB2     | 0.344707362 mirna_pc |
| 7114 hsa-mir-99b | LIG3      | 0.359901928 mirna_pc |
| 7115 hsa-mir-99b | CABLES2   | 0.321698814 mirna_pc |
| 7116 hsa-mir-99b | HOXA3     | 0.305533345 mirna_pc |
| 7117 hsa-mir-99b | PELP1     | 0.315498125 mirna_pc |
| 7118 hsa-mir-99b | ZNF773    | 0.416018271 mirna_pc |
| 7119 hsa-mir-99b | ZNF512B   | 0.333524158 mirna_pc |
| 7120 hsa-mir-99b | BCORL1    | 0.326392398 mirna_pc |
| 7121 hsa-mir-99b | SERPINF2  | 0.470091399 mirna_pc |
| 7122 hsa-mir-99b | CA5BP     | 0.343572253 mirna_pc |
| 7123 hsa-mir-99b | MAMSTR    | 0.317732769 mirna_pc |
| 7124 hsa-mir-99b | TMEM136   | 0.300889176 mirna_pc |
| 7125 hsa-mir-99b | VPS33A    | 0.341455681 mirna_pc |
| 7126 hsa-mir-99b | C10orf35  | 0.316854377 mirna_pc |
| 7127 hsa-mir-99b | GXYLT2    | 0.322771942 mirna_pc |



|                  |            |                      |
|------------------|------------|----------------------|
| 7128 hsa-mir-99b | EDAR       | 0.333218648 mirna_pc |
| 7129 hsa-mir-99b | IFT81      | 0.345874752 mirna_pc |
| 7130 hsa-mir-99b | ZNF304     | 0.347857446 mirna_pc |
| 7131 hsa-mir-99b | LOXL3      | 0.335095977 mirna_pc |
| 7132 hsa-mir-99b | PTOV1      | 0.335144647 mirna_pc |
| 7133 hsa-mir-99b | C1orf80    | 0.305364769 mirna_pc |
| 7134 hsa-mir-99b | ATF5       | 0.377231002 mirna_pc |
| 7135 hsa-mir-99b | IRF2BP1    | 0.303714268 mirna_pc |
| 7136 hsa-mir-99b | POLR3B     | 0.334989572 mirna_pc |
| 7137 hsa-mir-99b | DCTD       | 0.370043964 mirna_pc |
| 7138 hsa-mir-99b | ZNF180     | 0.374339795 mirna_pc |
| 7139 hsa-mir-99b | ANAPC4     | 0.344797937 mirna_pc |
| 7140 hsa-mir-99b | ZNF235     | 0.310490295 mirna_pc |
| 7141 hsa-mir-99b | FUZ        | 0.439008223 mirna_pc |
| 7142 hsa-mir-99b | ZNF771     | 0.34023051 mirna_pc  |
| 7143 hsa-mir-99b | ZNF45      | 0.465644845 mirna_pc |
| 7144 hsa-mir-99b | PRUNE      | 0.310477833 mirna_pc |
| 7145 hsa-mir-99b | NCRNA00085 | 0.54517107 mirna_pc  |
| 7146 hsa-mir-99b | TCTN2      | 0.447186081 mirna_pc |
| 7147 hsa-mir-99b | TOP3A      | 0.341123959 mirna_pc |
| 7148 hsa-mir-99b | EXTL2      | 0.490083795 mirna_pc |
| 7149 hsa-mir-99b | UBE2M      | 0.311392539 mirna_pc |
| 7150 hsa-mir-99b | DCP2       | 0.312376948 mirna_pc |
| 7151 hsa-mir-99b | ANXA9      | 0.350736469 mirna_pc |
| 7152 hsa-mir-99b | C2orf44    | 0.316951256 mirna_pc |
| 7153 hsa-mir-99b | SEPHS1     | 0.336411723 mirna_pc |
| 7154 hsa-mir-99b | SHISA2     | 0.303898286 mirna_pc |
| 7155 hsa-mir-99b | CBX5       | 0.381205248 mirna_pc |
| 7156 hsa-mir-99b | TMEM9      | 0.340389769 mirna_pc |
| 7157 hsa-mir-99b | AGBL5      | 0.458182015 mirna_pc |
| 7158 hsa-mir-99b | VASH2      | 0.385912206 mirna_pc |
| 7159 hsa-mir-99b | ISYNA1     | 0.407566259 mirna_pc |
| 7160 hsa-mir-99b | MYL6B      | 0.444333156 mirna_pc |
| 7161 hsa-mir-99b | ZNF498     | 0.351686589 mirna_pc |
| 7162 hsa-mir-99b | DTX3       | 0.496773934 mirna_pc |
| 7163 hsa-mir-99b | ZNF517     | 0.318470647 mirna_pc |
| 7164 hsa-mir-99b | CD200      | 0.317065729 mirna_pc |
| 7165 hsa-mir-99b | ZNF233     | 0.423190817 mirna_pc |
| 7166 hsa-mir-99b | TEAD2      | 0.454274832 mirna_pc |
| 7167 hsa-mir-99b | INTS1      | 0.309660348 mirna_pc |
| 7168 hsa-mir-99b | MED28      | 0.50514238 mirna_pc  |
| 7169 hsa-mir-99b | GPX7       | 0.334739941 mirna_pc |
| 7170 hsa-mir-99b | NME4       | 0.357415783 mirna_pc |
| 7171 hsa-mir-99b | CHST11     | 0.370967064 mirna_pc |
| 7172 hsa-mir-99b | FBX017     | 0.448553072 mirna_pc |
| 7173 hsa-mir-99b | ZNF496     | 0.361571672 mirna_pc |
| 7174 hsa-mir-99b | C4orf27    | 0.477235113 mirna_pc |
| 7175 hsa-mir-99b | ZNF512     | 0.350591378 mirna_pc |
| 7176 hsa-mir-99b | ZNF473     | 0.334325874 mirna_pc |
| 7177 hsa-mir-99b | SIX5       | 0.403941102 mirna_pc |
| 7178 hsa-mir-99b | ZNF544     | 0.376278016 mirna_pc |
| 7179 hsa-mir-99b | USP21      | 0.331168381 mirna_pc |
| 7180 hsa-mir-99b | PRR12      | 0.369443277 mirna_pc |
| 7181 hsa-mir-99b | ZCCHC4     | 0.390349563 mirna_pc |

|                  |           |                      |
|------------------|-----------|----------------------|
| 7182 hsa-mir-99b | PIH1D1    | 0.345782762 mirna_pc |
| 7183 hsa-mir-99b | ZMYM4     | 0.436945023 mirna_pc |
| 7184 hsa-mir-99b | DPF2      | 0.307680301 mirna_pc |
| 7185 hsa-mir-99b | LMAN2L    | 0.328561304 mirna_pc |
| 7186 hsa-mir-99b | TCF7L1    | 0.396279274 mirna_pc |
| 7187 hsa-mir-99b | PPP5C     | 0.495956082 mirna_pc |
| 7188 hsa-mir-99b | ZNF227    | 0.445781085 mirna_pc |
| 7189 hsa-mir-99b | HIC2      | 0.332894753 mirna_pc |
| 7190 hsa-mir-99b | THAP9     | 0.331227724 mirna_pc |
| 7191 hsa-mir-99b | LRFN1     | 0.438066025 mirna_pc |
| 7192 hsa-mir-99b | HNRNPH3   | 0.327330788 mirna_pc |
| 7193 hsa-mir-99b | NAP1L1    | 0.346346212 mirna_pc |
| 7194 hsa-mir-99b | C1orf156  | 0.302314604 mirna_pc |
| 7195 hsa-mir-99b | SLC26A11  | 0.443531204 mirna_pc |
| 7196 hsa-mir-99b | NLRP2     | 0.379634981 mirna_pc |
| 7197 hsa-mir-99b | NSL1      | 0.331718469 mirna_pc |
| 7198 hsa-mir-99b | C1orf216  | 0.382796258 mirna_pc |
| 7199 hsa-mir-99b | CNIH2     | 0.38714707 mirna_pc  |
| 7200 hsa-mir-99b | LOC400657 | 0.356785293 mirna_pc |
| 7201 hsa-mir-99b | DDX19A    | 0.388935499 mirna_pc |
| 7202 hsa-mir-99b | ALG10B    | 0.380121461 mirna_pc |
| 7203 hsa-mir-99b | MBNL3     | 0.358488197 mirna_pc |
| 7204 hsa-mir-99b | LRRC37B   | 0.370603635 mirna_pc |
| 7205 hsa-mir-99b | TSPYL3    | 0.429143981 mirna_pc |
| 7206 hsa-mir-99b | ZNF281    | 0.321386621 mirna_pc |
| 7207 hsa-mir-99b | FAM71E1   | 0.408438073 mirna_pc |
| 7208 hsa-mir-99b | PSTK      | 0.311207078 mirna_pc |
| 7209 hsa-mir-99b | PEG10     | 0.384420705 mirna_pc |
| 7210 hsa-mir-99b | SYCP2     | 0.32294964 mirna_pc  |
| 7211 hsa-mir-99b | MYCN      | 0.373914176 mirna_pc |
| 7212 hsa-mir-99b | C12orf24  | 0.308925485 mirna_pc |
| 7213 hsa-mir-99b | DCAF16    | 0.484998832 mirna_pc |
| 7214 hsa-mir-99b | CCDC102A  | 0.361877124 mirna_pc |
| 7215 hsa-mir-99b | SBK1      | 0.355601139 mirna_pc |
| 7216 hsa-mir-99b | PABPC4L   | 0.462249087 mirna_pc |
| 7217 hsa-mir-99b | ABCA11P   | 0.358233915 mirna_pc |
| 7218 hsa-mir-99b | C21orf67  | 0.372895456 mirna_pc |
| 7219 hsa-mir-99b | USP13     | 0.383208195 mirna_pc |
| 7220 hsa-mir-99b | HAUS3     | 0.311828233 mirna_pc |
| 7221 hsa-mir-99b | RASL10B   | 0.446563739 mirna_pc |
| 7222 hsa-mir-99b | ERLIN1    | 0.300612142 mirna_pc |
| 7223 hsa-mir-99b | C16orf46  | 0.365479379 mirna_pc |
| 7224 hsa-mir-99b | MSI1      | 0.304750742 mirna_pc |
| 7225 hsa-mir-99b | ZNF391    | 0.381736403 mirna_pc |
| 7226 hsa-mir-99b | NUDT17    | 0.449498665 mirna_pc |
| 7227 hsa-mir-99b | TTC39C    | 0.304503518 mirna_pc |
| 7228 hsa-mir-99b | GXYLT1    | 0.38940822 mirna_pc  |
| 7229 hsa-mir-99b | N4BP2     | 0.367954356 mirna_pc |
| 7230 hsa-mir-99b | ZNF740    | 0.378127807 mirna_pc |
| 7231 hsa-mir-99b | EP400     | 0.302020355 mirna_pc |
| 7232 hsa-mir-99b | TRO       | 0.484581375 mirna_pc |
| 7233 hsa-mir-99b | PACRGL    | 0.365322783 mirna_pc |
| 7234 hsa-mir-99b | LAMC1     | 0.422103125 mirna_pc |
| 7235 hsa-mir-99b | AKT2      | 0.304424089 mirna_pc |

|                  |           |                      |
|------------------|-----------|----------------------|
| 7236 hsa-mir-99b | PBX2      | 0.531569582 mirna_pc |
| 7237 hsa-mir-99b | NCKAP5L   | 0.368910733 mirna_pc |
| 7238 hsa-mir-99b | ZNF232    | 0.356871525 mirna_pc |
| 7239 hsa-mir-99b | ZBTB39    | 0.413994692 mirna_pc |
| 7240 hsa-mir-99b | ENO3      | 0.305222165 mirna_pc |
| 7241 hsa-mir-99b | C11orf95  | 0.351036507 mirna_pc |
| 7242 hsa-mir-99b | HSD17B14  | 0.416058614 mirna_pc |
| 7243 hsa-mir-99b | RBBP4     | 0.363330371 mirna_pc |
| 7244 hsa-mir-99b | ODZ3      | 0.315317941 mirna_pc |
| 7245 hsa-mir-99b | SPATS2    | 0.333381048 mirna_pc |
| 7246 hsa-mir-99b | ZNF618    | 0.410585615 mirna_pc |
| 7247 hsa-mir-99b | PLGLB2    | 0.367324099 mirna_pc |
| 7248 hsa-mir-99b | BRSK1     | 0.497962524 mirna_pc |
| 7249 hsa-mir-99b | PCDHB2    | 0.303867658 mirna_pc |
| 7250 hsa-mir-99b | ZNF22     | 0.380616128 mirna_pc |
| 7251 hsa-mir-99b | CHD4      | 0.333693518 mirna_pc |
| 7252 hsa-mir-99b | ZNF550    | 0.390029539 mirna_pc |
| 7253 hsa-mir-99b | C19orf63  | 0.321022549 mirna_pc |
| 7254 hsa-mir-99b | CCDC111   | 0.351439745 mirna_pc |
| 7255 hsa-mir-99b | LRDD      | 0.328757384 mirna_pc |
| 7256 hsa-mir-99b | LOC645166 | 0.347830212 mirna_pc |
| 7257 hsa-mir-99b | PDGFA     | 0.305560317 mirna_pc |
| 7258 hsa-mir-99b | C17orf79  | 0.312290702 mirna_pc |
| 7259 hsa-mir-99b | KDELC2    | 0.342220067 mirna_pc |
| 7260 hsa-mir-99b | RAB3IL1   | 0.322763466 mirna_pc |
| 7261 hsa-mir-99b | C4orf42   | 0.30607873 mirna_pc  |
| 7262 hsa-mir-99b | SIKE1     | 0.311097438 mirna_pc |
| 7263 hsa-mir-99b | FAM171B   | 0.362094797 mirna_pc |
| 7264 hsa-mir-99b | ZNF594    | 0.328396525 mirna_pc |
| 7265 hsa-mir-99b | ZCCHC11   | 0.342112737 mirna_pc |
| 7266 hsa-mir-99b | ASXL1     | 0.394011135 mirna_pc |
| 7267 hsa-mir-99b | BCAM      | 0.338626318 mirna_pc |
| 7268 hsa-mir-99b | ZCCHC3    | 0.369999858 mirna_pc |
| 7269 hsa-mir-99b | KLHL29    | 0.420241912 mirna_pc |
| 7270 hsa-mir-99b | ETV5      | 0.384987765 mirna_pc |
| 7271 hsa-mir-99b | COL9A3    | 0.311023557 mirna_pc |
| 7272 hsa-mir-99b | NLGN2     | 0.310714178 mirna_pc |
| 7273 hsa-mir-99b | NUCKS1    | 0.306273109 mirna_pc |
| 7274 hsa-mir-99b | KIAA1430  | 0.373893426 mirna_pc |
| 7275 hsa-mir-99b | TCTN1     | 0.4101015 mirna_pc   |
| 7276 hsa-mir-99b | ZNF419    | 0.426511062 mirna_pc |
| 7277 hsa-mir-99b | AADAT     | 0.415170889 mirna_pc |
| 7278 hsa-mir-99b | IGHMBP2   | 0.400406415 mirna_pc |
| 7279 hsa-mir-99b | CTXN1     | 0.308183931 mirna_pc |
| 7280 hsa-mir-99b | FRAS1     | 0.442465872 mirna_pc |
| 7281 hsa-mir-99b | OBSCN     | 0.346918864 mirna_pc |
| 7282 hsa-mir-99b | SERF1A    | 0.315073046 mirna_pc |
| 7283 hsa-mir-99b | LOC80054  | 0.424675767 mirna_pc |
| 7284 hsa-mir-99b | ZNF772    | 0.414471133 mirna_pc |
| 7285 hsa-mir-99b | QPRT      | 0.31891539 mirna_pc  |
| 7286 hsa-mir-99b | PRMT6     | 0.328720978 mirna_pc |
| 7287 hsa-mir-99b | ZMYM3     | 0.444744118 mirna_pc |
| 7288 hsa-mir-99b | KCND1     | 0.376248298 mirna_pc |
| 7289 hsa-mir-99b | HSDL1     | 0.325862627 mirna_pc |

|                   |           |                      |
|-------------------|-----------|----------------------|
| 7290 hsa-mir-99b  | AASDH     | 0.300735736 mirna_pc |
| 7291 hsa-mir-99b  | ZNF530    | 0.481938691 mirna_pc |
| 7292 hsa-mir-99b  | H2AFY2    | 0.356796394 mirna_pc |
| 7293 hsa-mir-99b  | BAI2      | 0.362038602 mirna_pc |
| 7294 hsa-mir-99b  | TRIL      | 0.436139434 mirna_pc |
| 7295 hsa-mir-99b  | C1orf103  | 0.38563191 mirna_pc  |
| 7296 hsa-mir-99b  | AGT       | 0.369118549 mirna_pc |
| 7297 hsa-mir-99b  | HSPC157   | 0.31009882 mirna_pc  |
| 7298 hsa-mir-99b  | MPP6      | 0.388528477 mirna_pc |
| 7299 hsa-mir-99b  | BOD1      | 0.305574796 mirna_pc |
| 7300 hsa-mir-99b  | MTSS1L    | 0.309590013 mirna_pc |
| 7301 hsa-mir-99b  | SMARCA1   | 0.363665997 mirna_pc |
| 7302 hsa-mir-99b  | SCHIP1    | 0.300460672 mirna_pc |
| 7303 hsa-mir-99b  | LOC642852 | 0.315328102 mirna_pc |
| 7304 hsa-mir-99b  | SV2A      | 0.456519942 mirna_pc |
| 7305 hsa-mir-99b  | NT5M      | 0.321702291 mirna_pc |
| 7306 hsa-mir-99b  | SEMA4C    | 0.333666774 mirna_pc |
| 7307 hsa-mir-99b  | THOC5     | 0.328243413 mirna_pc |
| 7308 hsa-mir-99b  | EFNB3     | 0.415884746 mirna_pc |
| 7309 hsa-mir-99b  | KIF7      | 0.366181759 mirna_pc |
| 7310 hsa-mir-99b  | NRSN2     | 0.407686119 mirna_pc |
| 7311 hsa-mir-99b  | DNMT3A    | 0.483596807 mirna_pc |
| 7312 hsa-mir-99b  | ZNF821    | 0.375248932 mirna_pc |
| 7313 hsa-mir-99b  | TET1      | 0.350838 mirna_pc    |
| 7314 hsa-mir-99b  | ACCN2     | 0.309802749 mirna_pc |
| 7315 hsa-mir-99b  | PATZ1     | 0.344186471 mirna_pc |
| 7316 hsa-mir-99b  | UBE2MP1   | 0.32504584 mirna_pc  |
| 7317 hsa-mir-99b  | TMEM231   | 0.324121497 mirna_pc |
| 7318 hsa-mir-99b  | ZNF691    | 0.358321951 mirna_pc |
| 7319 hsa-mir-1180 | TPX2      | 0.328317215 mirna_pc |
| 7320 hsa-mir-1180 | KPNA2     | 0.334113723 mirna_pc |
| 7321 hsa-mir-1180 | CENPF     | 0.34340257 mirna_pc  |
| 7322 hsa-mir-1180 | RCC2      | 0.461574893 mirna_pc |
| 7323 hsa-mir-1180 | HOXC9     | 0.429690855 mirna_pc |
| 7324 hsa-mir-1180 | KIF11     | 0.359545579 mirna_pc |
| 7325 hsa-mir-1180 | ECT2      | 0.367153191 mirna_pc |
| 7326 hsa-mir-1180 | RRM2      | 0.307886759 mirna_pc |
| 7327 hsa-mir-1180 | CDC25C    | 0.303041738 mirna_pc |
| 7328 hsa-mir-1180 | PLK1      | 0.358452384 mirna_pc |
| 7329 hsa-mir-1180 | UBE2C     | 0.34146762 mirna_pc  |
| 7330 hsa-mir-1180 | BUB1      | 0.351037982 mirna_pc |
| 7331 hsa-mir-1180 | NUSAP1    | 0.354530463 mirna_pc |
| 7332 hsa-mir-1180 | MCM4      | 0.341307639 mirna_pc |
| 7333 hsa-mir-1180 | KIFC1     | 0.327478638 mirna_pc |
| 7334 hsa-mir-1180 | BUB1B     | 0.407562301 mirna_pc |
| 7335 hsa-mir-1180 | KIF18B    | 0.350071476 mirna_pc |
| 7336 hsa-mir-1180 | FAM72A    | 0.302311958 mirna_pc |
| 7337 hsa-mir-1180 | KIF2C     | 0.413515997 mirna_pc |
| 7338 hsa-mir-1180 | NCAPG     | 0.329591639 mirna_pc |
| 7339 hsa-mir-1180 | CDC20     | 0.352067481 mirna_pc |
| 7340 hsa-mir-1180 | CCNA2     | 0.463181014 mirna_pc |
| 7341 hsa-mir-1180 | SPC25     | 0.323694818 mirna_pc |
| 7342 hsa-mir-1180 | FANCI     | 0.36421193 mirna_pc  |
| 7343 hsa-mir-1180 | NEK2      | 0.355468204 mirna_pc |

|                   |          |                      |
|-------------------|----------|----------------------|
| 7344 hsa-mir-1180 | MND1     | 0.470935223 mirna_pc |
| 7345 hsa-mir-1180 | KIF22    | 0.421686852 mirna_pc |
| 7346 hsa-mir-1180 | DDX39    | 0.330812454 mirna_pc |
| 7347 hsa-mir-1180 | NCAPH    | 0.420003997 mirna_pc |
| 7348 hsa-mir-1180 | GTSE1    | 0.340464059 mirna_pc |
| 7349 hsa-mir-1180 | RAD54L   | 0.409806262 mirna_pc |
| 7350 hsa-mir-1180 | CENPA    | 0.456565843 mirna_pc |
| 7351 hsa-mir-1180 | MAD2L1   | 0.554511347 mirna_pc |
| 7352 hsa-mir-1180 | TIMELESS | 0.488104738 mirna_pc |
| 7353 hsa-mir-1180 | LMNB1    | 0.328502131 mirna_pc |
| 7354 hsa-mir-1180 | CDCA8    | 0.350593273 mirna_pc |
| 7355 hsa-mir-1180 | TROAP    | 0.451548904 mirna_pc |
| 7356 hsa-mir-1180 | CDCA5    | 0.302460154 mirna_pc |
| 7357 hsa-mir-1180 | XPO1     | 0.321386592 mirna_pc |
| 7358 hsa-mir-1180 | CDC45    | 0.373221395 mirna_pc |
| 7359 hsa-mir-1180 | STMN1    | 0.402516062 mirna_pc |
| 7360 hsa-mir-1180 | EXO1     | 0.333630313 mirna_pc |
| 7361 hsa-mir-1180 | CDCA2    | 0.337186759 mirna_pc |
| 7362 hsa-mir-1180 | DKC1     | 0.386169977 mirna_pc |
| 7363 hsa-mir-1180 | UBE2T    | 0.303647151 mirna_pc |
| 7364 hsa-mir-1180 | CKS1B    | 0.415385937 mirna_pc |
| 7365 hsa-mir-1180 | TUBB     | 0.463088751 mirna_pc |
| 7366 hsa-mir-1180 | MCM2     | 0.380310844 mirna_pc |
| 7367 hsa-mir-1180 | ORC1L    | 0.322584044 mirna_pc |
| 7368 hsa-mir-1180 | KNTC1    | 0.315814304 mirna_pc |
| 7369 hsa-mir-1180 | CCNF     | 0.332528157 mirna_pc |
| 7370 hsa-mir-1180 | RACGAP1  | 0.345989197 mirna_pc |
| 7371 hsa-mir-1180 | CCNB2    | 0.328145812 mirna_pc |
| 7372 hsa-mir-1180 | NUF2     | 0.390477888 mirna_pc |
| 7373 hsa-mir-1180 | PLK4     | 0.458307034 mirna_pc |
| 7374 hsa-mir-1180 | FANCB    | 0.321115218 mirna_pc |
| 7375 hsa-mir-1180 | DEPDC1   | 0.348686291 mirna_pc |
| 7376 hsa-mir-1180 | SKA3     | 0.348061525 mirna_pc |
| 7377 hsa-mir-1180 | HJURP    | 0.370076268 mirna_pc |
| 7378 hsa-mir-1180 | SKA1     | 0.304738436 mirna_pc |
| 7379 hsa-mir-1180 | RAD51    | 0.366508752 mirna_pc |
| 7380 hsa-mir-1180 | BLM      | 0.320760855 mirna_pc |
| 7381 hsa-mir-1180 | NME1     | 0.335676257 mirna_pc |
| 7382 hsa-mir-1180 | DNMT1    | 0.315695229 mirna_pc |
| 7383 hsa-mir-1180 | PAICS    | 0.456457013 mirna_pc |
| 7384 hsa-mir-1180 | BIRC5    | 0.410095028 mirna_pc |
| 7385 hsa-mir-1180 | OIP5     | 0.35926445 mirna_pc  |
| 7386 hsa-mir-1180 | DTL      | 0.385796808 mirna_pc |
| 7387 hsa-mir-1180 | EME1     | 0.466633248 mirna_pc |
| 7388 hsa-mir-1180 | RECQL4   | 0.36434141 mirna_pc  |
| 7389 hsa-mir-1180 | AURKB    | 0.467075898 mirna_pc |
| 7390 hsa-mir-1180 | GSG2     | 0.428166761 mirna_pc |
| 7391 hsa-mir-1180 | MCM10    | 0.412740694 mirna_pc |
| 7392 hsa-mir-1180 | KIF20A   | 0.307910051 mirna_pc |
| 7393 hsa-mir-1180 | CHEK2    | 0.410490792 mirna_pc |
| 7394 hsa-mir-1180 | CDCA3    | 0.370736612 mirna_pc |
| 7395 hsa-mir-1180 | Clorf112 | 0.445671693 mirna_pc |
| 7396 hsa-mir-1180 | GINS1    | 0.31651871 mirna_pc  |
| 7397 hsa-mir-1180 | ALG3     | 0.411222057 mirna_pc |

|                   |          |                      |
|-------------------|----------|----------------------|
| 7398 hsa-mir-1180 | FEN1     | 0.374511619 mirna_pc |
| 7399 hsa-mir-1180 | ORC6L    | 0.380415731 mirna_pc |
| 7400 hsa-mir-1180 | ERH      | 0.341391978 mirna_pc |
| 7401 hsa-mir-1180 | PBK      | 0.311106747 mirna_pc |
| 7402 hsa-mir-1180 | C16orf59 | 0.523669846 mirna_pc |
| 7403 hsa-mir-1180 | C17orf53 | 0.369198346 mirna_pc |
| 7404 hsa-mir-1180 | RAE1     | 0.329442469 mirna_pc |
| 7405 hsa-mir-1180 | FAM72D   | 0.369720141 mirna_pc |
| 7406 hsa-mir-1180 | FAM72B   | 0.373976114 mirna_pc |
| 7407 hsa-mir-1180 | NEIL3    | 0.471902814 mirna_pc |
| 7408 hsa-mir-1180 | ACTL6A   | 0.519829661 mirna_pc |
| 7409 hsa-mir-1180 | C12orf48 | 0.34841399 mirna_pc  |
| 7410 hsa-mir-1180 | HNRNPL   | 0.40729268 mirna_pc  |
| 7411 hsa-mir-1180 | SMC4     | 0.371842013 mirna_pc |
| 7412 hsa-mir-1180 | PKMYT1   | 0.325356417 mirna_pc |
| 7413 hsa-mir-1180 | TTK      | 0.363543206 mirna_pc |
| 7414 hsa-mir-1180 | ZWINT    | 0.307466922 mirna_pc |
| 7415 hsa-mir-1180 | TUBA1B   | 0.355121113 mirna_pc |
| 7416 hsa-mir-1180 | RUVBL1   | 0.401273699 mirna_pc |
| 7417 hsa-mir-1180 | UBE2S    | 0.402521183 mirna_pc |
| 7418 hsa-mir-1180 | C11orf82 | 0.46134729 mirna_pc  |
| 7419 hsa-mir-1180 | HNRNPC   | 0.432195956 mirna_pc |
| 7420 hsa-mir-1180 | ILF2     | 0.492340712 mirna_pc |
| 7421 hsa-mir-1180 | C6orf167 | 0.31099957 mirna_pc  |
| 7422 hsa-mir-1180 | TFRC     | 0.408605705 mirna_pc |
| 7423 hsa-mir-1180 | MCM5     | 0.30582204 mirna_pc  |
| 7424 hsa-mir-1180 | RFWD3    | 0.386513304 mirna_pc |
| 7425 hsa-mir-1180 | C20orf20 | 0.337175442 mirna_pc |
| 7426 hsa-mir-1180 | MCM6     | 0.361260695 mirna_pc |
| 7427 hsa-mir-1180 | RNASEH2A | 0.339353181 mirna_pc |
| 7428 hsa-mir-1180 | EPR1     | 0.457843199 mirna_pc |
| 7429 hsa-mir-1180 | KIAA1524 | 0.300067366 mirna_pc |
| 7430 hsa-mir-1180 | SFRS2    | 0.366267621 mirna_pc |
| 7431 hsa-mir-1180 | UCK2     | 0.472281533 mirna_pc |
| 7432 hsa-mir-1180 | EFTUD2   | 0.350714228 mirna_pc |
| 7433 hsa-mir-1180 | NFKBIL2  | 0.429424656 mirna_pc |
| 7434 hsa-mir-1180 | C15orf42 | 0.363167353 mirna_pc |
| 7435 hsa-mir-1180 | FAM60A   | 0.341579099 mirna_pc |
| 7436 hsa-mir-1180 | HMGB3    | 0.404147585 mirna_pc |
| 7437 hsa-mir-1180 | FAM64A   | 0.334548616 mirna_pc |
| 7438 hsa-mir-1180 | RANBP1   | 0.344378162 mirna_pc |
| 7439 hsa-mir-1180 | SNRPG    | 0.325971922 mirna_pc |
| 7440 hsa-mir-1180 | EIF4A3   | 0.34605746 mirna_pc  |
| 7441 hsa-mir-1180 | TH1L     | 0.315091954 mirna_pc |
| 7442 hsa-mir-1180 | SNRPA    | 0.410905995 mirna_pc |
| 7443 hsa-mir-1180 | FUS      | 0.474140799 mirna_pc |
| 7444 hsa-mir-1180 | C1orf135 | 0.537640739 mirna_pc |
| 7445 hsa-mir-1180 | U2AF2    | 0.378044489 mirna_pc |
| 7446 hsa-mir-1180 | RFC3     | 0.322597078 mirna_pc |
| 7447 hsa-mir-1180 | CHAF1A   | 0.38530723 mirna_pc  |
| 7448 hsa-mir-1180 | GINS4    | 0.324545734 mirna_pc |
| 7449 hsa-mir-1180 | ANP32E   | 0.361499307 mirna_pc |
| 7450 hsa-mir-1180 | CENPO    | 0.474806595 mirna_pc |
| 7451 hsa-mir-1180 | TRIP13   | 0.318493781 mirna_pc |

|                   |          |                      |
|-------------------|----------|----------------------|
| 7452 hsa-mir-1180 | C19orf48 | 0.392649666 mirna_pc |
| 7453 hsa-mir-1180 | TRIM59   | 0.310656533 mirna_pc |
| 7454 hsa-mir-1180 | CENPL    | 0.317636869 mirna_pc |
| 7455 hsa-mir-1180 | ARL6IP1  | 0.387410186 mirna_pc |
| 7456 hsa-mir-1180 | NUDT1    | 0.328318225 mirna_pc |
| 7457 hsa-mir-1180 | HMGB2    | 0.404069393 mirna_pc |
| 7458 hsa-mir-1180 | GINS2    | 0.364978266 mirna_pc |
| 7459 hsa-mir-1180 | DNA2     | 0.31793361 mirna_pc  |
| 7460 hsa-mir-1180 | NOP56    | 0.338847023 mirna_pc |
| 7461 hsa-mir-1180 | SNHG1    | 0.475061322 mirna_pc |
| 7462 hsa-mir-1180 | CSE1L    | 0.326824798 mirna_pc |
| 7463 hsa-mir-1180 | DTYMK    | 0.342191324 mirna_pc |
| 7464 hsa-mir-1180 | TMEM206  | 0.32825472 mirna_pc  |
| 7465 hsa-mir-1180 | PRMT1    | 0.440690975 mirna_pc |
| 7466 hsa-mir-1180 | C16orf75 | 0.348391042 mirna_pc |
| 7467 hsa-mir-1180 | NOP2     | 0.321590059 mirna_pc |
| 7468 hsa-mir-1180 | CAD      | 0.405927838 mirna_pc |
| 7469 hsa-mir-1180 | ZFP64    | 0.504190441 mirna_pc |
| 7470 hsa-mir-1180 | CDK2     | 0.343043775 mirna_pc |
| 7471 hsa-mir-1180 | CDK4     | 0.434724624 mirna_pc |
| 7472 hsa-mir-1180 | INCENP   | 0.328218766 mirna_pc |
| 7473 hsa-mir-1180 | PFDN2    | 0.378495775 mirna_pc |
| 7474 hsa-mir-1180 | CHTF18   | 0.370099397 mirna_pc |
| 7475 hsa-mir-1180 | HNRNPR   | 0.482513094 mirna_pc |
| 7476 hsa-mir-1180 | DLEU2    | 0.323699031 mirna_pc |
| 7477 hsa-mir-1180 | KAT2A    | 0.520700701 mirna_pc |
| 7478 hsa-mir-1180 | CENPH    | 0.308024086 mirna_pc |
| 7479 hsa-mir-1180 | PSMC4    | 0.340440206 mirna_pc |
| 7480 hsa-mir-1180 | TCOF1    | 0.313385342 mirna_pc |
| 7481 hsa-mir-1180 | DHX34    | 0.340299424 mirna_pc |
| 7482 hsa-mir-1180 | MSH2     | 0.347043383 mirna_pc |
| 7483 hsa-mir-1180 | PRPF19   | 0.502445661 mirna_pc |
| 7484 hsa-mir-1180 | DBF4     | 0.310141689 mirna_pc |
| 7485 hsa-mir-1180 | SF3B3    | 0.463014043 mirna_pc |
| 7486 hsa-mir-1180 | CDC7     | 0.362293402 mirna_pc |
| 7487 hsa-mir-1180 | SSB      | 0.312588618 mirna_pc |
| 7488 hsa-mir-1180 | YDJC     | 0.338212461 mirna_pc |
| 7489 hsa-mir-1180 | PUS1     | 0.336212569 mirna_pc |
| 7490 hsa-mir-1180 | NOL11    | 0.368698101 mirna_pc |
| 7491 hsa-mir-1180 | SNRPC    | 0.358832763 mirna_pc |
| 7492 hsa-mir-1180 | TMEM41A  | 0.335973276 mirna_pc |
| 7493 hsa-mir-1180 | RFC4     | 0.468353252 mirna_pc |
| 7494 hsa-mir-1180 | FBX05    | 0.330967792 mirna_pc |
| 7495 hsa-mir-1180 | FIGNL1   | 0.31248851 mirna_pc  |
| 7496 hsa-mir-1180 | BRIX1    | 0.323520636 mirna_pc |
| 7497 hsa-mir-1180 | E2F3     | 0.370630298 mirna_pc |
| 7498 hsa-mir-1180 | CDC25A   | 0.373626696 mirna_pc |
| 7499 hsa-mir-1180 | TOPBP1   | 0.338749976 mirna_pc |
| 7500 hsa-mir-1180 | TMEM48   | 0.312794347 mirna_pc |
| 7501 hsa-mir-1180 | RAD54B   | 0.351453379 mirna_pc |
| 7502 hsa-mir-1180 | OTX1     | 0.402747728 mirna_pc |
| 7503 hsa-mir-1180 | H2AFZ    | 0.453373199 mirna_pc |
| 7504 hsa-mir-1180 | PRR7     | 0.366639752 mirna_pc |
| 7505 hsa-mir-1180 | CPSF3    | 0.374479874 mirna_pc |

|                   |              |                      |
|-------------------|--------------|----------------------|
| 7506 hsa-mir-1180 | BANF1        | 0.314738913 mirna_pc |
| 7507 hsa-mir-1180 | SNRPE        | 0.413853135 mirna_pc |
| 7508 hsa-mir-1180 | C21orf45     | 0.49171275 mirna_pc  |
| 7509 hsa-mir-1180 | PPM1G        | 0.316801544 mirna_pc |
| 7510 hsa-mir-1180 | DNAJB11      | 0.346178217 mirna_pc |
| 7511 hsa-mir-1180 | SNRPD2       | 0.335181508 mirna_pc |
| 7512 hsa-mir-1180 | NPM3         | 0.346934535 mirna_pc |
| 7513 hsa-mir-1180 | TFAP4        | 0.444648555 mirna_pc |
| 7514 hsa-mir-1180 | RNPS1        | 0.412336817 mirna_pc |
| 7515 hsa-mir-1180 | DAZAP1       | 0.319807615 mirna_pc |
| 7516 hsa-mir-1180 | CBX8         | 0.451527894 mirna_pc |
| 7517 hsa-mir-1180 | TBL1XR1      | 0.309469188 mirna_pc |
| 7518 hsa-mir-1180 | TMEM201      | 0.467423778 mirna_pc |
| 7519 hsa-mir-1180 | NCL          | 0.305426924 mirna_pc |
| 7520 hsa-mir-1180 | PAFAH1B3     | 0.356845911 mirna_pc |
| 7521 hsa-mir-1180 | SRRT         | 0.339305556 mirna_pc |
| 7522 hsa-mir-1180 | DCTPP1       | 0.301373881 mirna_pc |
| 7523 hsa-mir-1180 | PSRC1        | 0.414900619 mirna_pc |
| 7524 hsa-mir-1180 | DGUOK        | 0.362912898 mirna_pc |
| 7525 hsa-mir-1180 | MRPL47       | 0.418095072 mirna_pc |
| 7526 hsa-mir-1180 | DBF4B        | 0.312986387 mirna_pc |
| 7527 hsa-mir-1180 | FBL          | 0.465188384 mirna_pc |
| 7528 hsa-mir-1180 | HIST1H1E     | 0.318020202 mirna_pc |
| 7529 hsa-mir-1180 | EXOSC5       | 0.350122 mirna_pc    |
| 7530 hsa-mir-1180 | HNRNPM       | 0.38439853 mirna_pc  |
| 7531 hsa-mir-1180 | PRCC         | 0.458199054 mirna_pc |
| 7532 hsa-mir-1180 | POLR2H       | 0.562728083 mirna_pc |
| 7533 hsa-mir-1180 | C3orf26      | 0.380580427 mirna_pc |
| 7534 hsa-mir-1180 | SMPD4        | 0.31132155 mirna_pc  |
| 7535 hsa-mir-1180 | FLAD1        | 0.310738262 mirna_pc |
| 7536 hsa-mir-1180 | LSG1         | 0.495019033 mirna_pc |
| 7537 hsa-mir-1180 | PPIH         | 0.301933406 mirna_pc |
| 7538 hsa-mir-1180 | THOC6        | 0.365999877 mirna_pc |
| 7539 hsa-mir-1180 | GMPS         | 0.429949213 mirna_pc |
| 7540 hsa-mir-1180 | PPAT         | 0.400068186 mirna_pc |
| 7541 hsa-mir-1180 | DHX9         | 0.461097983 mirna_pc |
| 7542 hsa-mir-1180 | CCDC138      | 0.358506887 mirna_pc |
| 7543 hsa-mir-1180 | LOC100128191 | 0.362633283 mirna_pc |
| 7544 hsa-mir-1180 | MRPL3        | 0.442398159 mirna_pc |
| 7545 hsa-mir-1180 | EIF5A        | 0.311646867 mirna_pc |
| 7546 hsa-mir-1180 | ETV4         | 0.325842512 mirna_pc |
| 7547 hsa-mir-1180 | MORC2        | 0.362719711 mirna_pc |
| 7548 hsa-mir-1180 | CHRNA5       | 0.35777081 mirna_pc  |
| 7549 hsa-mir-1180 | SMYD5        | 0.414832071 mirna_pc |
| 7550 hsa-mir-1180 | TSSC1        | 0.319635827 mirna_pc |
| 7551 hsa-mir-1180 | POLA2        | 0.309406466 mirna_pc |
| 7552 hsa-mir-1180 | SUMO2        | 0.350591614 mirna_pc |
| 7553 hsa-mir-1180 | SFRS1        | 0.427309759 mirna_pc |
| 7554 hsa-mir-1180 | CDH24        | 0.345549749 mirna_pc |
| 7555 hsa-mir-1180 | WDR43        | 0.329623814 mirna_pc |
| 7556 hsa-mir-1180 | CCDC58       | 0.361569176 mirna_pc |
| 7557 hsa-mir-1180 | SKP2         | 0.366043751 mirna_pc |
| 7558 hsa-mir-1180 | UBE2I        | 0.310633316 mirna_pc |
| 7559 hsa-mir-1180 | TIPIN        | 0.313503287 mirna_pc |



|                   |          |                      |
|-------------------|----------|----------------------|
| 7560 hsa-mir-1180 | SMARCD1  | 0.348650549 mirna_pc |
| 7561 hsa-mir-1180 | ATXN2L   | 0.307520392 mirna_pc |
| 7562 hsa-mir-1180 | HSPBP1   | 0.309647699 mirna_pc |
| 7563 hsa-mir-1180 | C4orf46  | 0.414822186 mirna_pc |
| 7564 hsa-mir-1180 | FZD2     | 0.324619872 mirna_pc |
| 7565 hsa-mir-1180 | ECE2     | 0.491065051 mirna_pc |
| 7566 hsa-mir-1180 | Clorf107 | 0.304034064 mirna_pc |
| 7567 hsa-mir-1180 | RFC5     | 0.332372584 mirna_pc |
| 7568 hsa-mir-1180 | MAZ      | 0.453661004 mirna_pc |
| 7569 hsa-mir-1180 | SSRP1    | 0.352970023 mirna_pc |
| 7570 hsa-mir-1180 | POLR2D   | 0.404434123 mirna_pc |
| 7571 hsa-mir-1180 | FTSJ2    | 0.304792257 mirna_pc |
| 7572 hsa-mir-1180 | PA2G4    | 0.344515397 mirna_pc |
| 7573 hsa-mir-1180 | SNRPD3   | 0.338694738 mirna_pc |
| 7574 hsa-mir-1180 | EPT1     | 0.363451026 mirna_pc |
| 7575 hsa-mir-1180 | KHDRBS1  | 0.317809201 mirna_pc |
| 7576 hsa-mir-1180 | C20orf27 | 0.365332599 mirna_pc |
| 7577 hsa-mir-1180 | YEATS2   | 0.350844402 mirna_pc |
| 7578 hsa-mir-1180 | SPAST    | 0.359703498 mirna_pc |
| 7579 hsa-mir-1180 | LOC92659 | 0.393998458 mirna_pc |
| 7580 hsa-mir-1180 | MTL 5.00 | 0.440515778 mirna_pc |
| 7581 hsa-mir-1180 | RNF220   | 0.310037051 mirna_pc |
| 7582 hsa-mir-1180 | B3GNT5   | 0.340130678 mirna_pc |
| 7583 hsa-mir-1180 | PARP1    | 0.394564776 mirna_pc |
| 7584 hsa-mir-1180 | CCT7     | 0.314576237 mirna_pc |
| 7585 hsa-mir-1180 | TMEM194A | 0.352363444 mirna_pc |
| 7586 hsa-mir-1180 | TDP1     | 0.333463952 mirna_pc |
| 7587 hsa-mir-1180 | SUV420H2 | 0.354047859 mirna_pc |
| 7588 hsa-mir-1180 | ZNF695   | 0.304518032 mirna_pc |
| 7589 hsa-mir-1180 | METTL1   | 0.374050227 mirna_pc |
| 7590 hsa-mir-1180 | CENPJ    | 0.324718372 mirna_pc |
| 7591 hsa-mir-1180 | LIN9     | 0.319490789 mirna_pc |
| 7592 hsa-mir-1180 | GNL2     | 0.316706412 mirna_pc |
| 7593 hsa-mir-1180 | WRAP53   | 0.374551941 mirna_pc |
| 7594 hsa-mir-1180 | SREBF1   | 0.397226578 mirna_pc |
| 7595 hsa-mir-1180 | KRI1     | 0.343459638 mirna_pc |
| 7596 hsa-mir-1180 | NOC2L    | 0.351669018 mirna_pc |
| 7597 hsa-mir-1180 | RPP40    | 0.373596589 mirna_pc |
| 7598 hsa-mir-1180 | CCDC86   | 0.439351494 mirna_pc |
| 7599 hsa-mir-1180 | ZNF280C  | 0.367463056 mirna_pc |
| 7600 hsa-mir-1180 | POLR1B   | 0.364149102 mirna_pc |
| 7601 hsa-mir-1180 | PTMA     | 0.326468909 mirna_pc |
| 7602 hsa-mir-1180 | USP39    | 0.405602312 mirna_pc |
| 7603 hsa-mir-1180 | HMGXB4   | 0.302342186 mirna_pc |
| 7604 hsa-mir-1180 | C11orf84 | 0.472947316 mirna_pc |
| 7605 hsa-mir-1180 | TBCE     | 0.437773088 mirna_pc |
| 7606 hsa-mir-1180 | CLCN2    | 0.469082495 mirna_pc |
| 7607 hsa-mir-1180 | NCBP2    | 0.469977421 mirna_pc |
| 7608 hsa-mir-1180 | SUV39H2  | 0.456993197 mirna_pc |
| 7609 hsa-mir-1180 | LSM 2.00 | 0.368316558 mirna_pc |
| 7610 hsa-mir-1180 | TMEM177  | 0.373501667 mirna_pc |
| 7611 hsa-mir-1180 | HNRNPD   | 0.420263729 mirna_pc |
| 7612 hsa-mir-1180 | DPY30    | 0.357183458 mirna_pc |
| 7613 hsa-mir-1180 | MTHFD2   | 0.420009743 mirna_pc |

|                   |          |                      |
|-------------------|----------|----------------------|
| 7614 hsa-mir-1180 | DPH2     | 0.323528445 mirna_pc |
| 7615 hsa-mir-1180 | SFRS3    | 0.442784245 mirna_pc |
| 7616 hsa-mir-1180 | SHOX2    | 0.360875647 mirna_pc |
| 7617 hsa-mir-1180 | MEN1     | 0.347319079 mirna_pc |
| 7618 hsa-mir-1180 | FAM53C   | 0.327282041 mirna_pc |
| 7619 hsa-mir-1180 | H1FX     | 0.361524738 mirna_pc |
| 7620 hsa-mir-1180 | PN01     | 0.308223935 mirna_pc |
| 7621 hsa-mir-1180 | CCT4     | 0.329956062 mirna_pc |
| 7622 hsa-mir-1180 | UMPS     | 0.382370427 mirna_pc |
| 7623 hsa-mir-1180 | SPNS1    | 0.300922034 mirna_pc |
| 7624 hsa-mir-1180 | ELAVL1   | 0.462921456 mirna_pc |
| 7625 hsa-mir-1180 | TSPYL5   | 0.310541526 mirna_pc |
| 7626 hsa-mir-1180 | ABCE1    | 0.351132855 mirna_pc |
| 7627 hsa-mir-1180 | PRMT5    | 0.319586791 mirna_pc |
| 7628 hsa-mir-1180 | MIF      | 0.3011867 mirna_pc   |
| 7629 hsa-mir-1180 | ULK2     | 0.309444285 mirna_pc |
| 7630 hsa-mir-1180 | EIF4A1   | 0.302065975 mirna_pc |
| 7631 hsa-mir-1180 | NCAPD3   | 0.32757168 mirna_pc  |
| 7632 hsa-mir-1180 | TRMT1    | 0.308875398 mirna_pc |
| 7633 hsa-mir-1180 | NAE1     | 0.312450685 mirna_pc |
| 7634 hsa-mir-1180 | USP22    | 0.416817653 mirna_pc |
| 7635 hsa-mir-1180 | PSMC3IP  | 0.325249019 mirna_pc |
| 7636 hsa-mir-1180 | TBC1D7   | 0.439641055 mirna_pc |
| 7637 hsa-mir-1180 | PAK1IP1  | 0.461947507 mirna_pc |
| 7638 hsa-mir-1180 | PAK2     | 0.327876535 mirna_pc |
| 7639 hsa-mir-1180 | TRMT112  | 0.312718801 mirna_pc |
| 7640 hsa-mir-1180 | PSMD2    | 0.381513049 mirna_pc |
| 7641 hsa-mir-1180 | ATP13A3  | 0.333228582 mirna_pc |
| 7642 hsa-mir-1180 | YWHAE    | 0.491335693 mirna_pc |
| 7643 hsa-mir-1180 | NAA25    | 0.37574817 mirna_pc  |
| 7644 hsa-mir-1180 | KDM1A    | 0.300486201 mirna_pc |
| 7645 hsa-mir-1180 | PDCL3    | 0.352006936 mirna_pc |
| 7646 hsa-mir-1180 | ILF3     | 0.451390166 mirna_pc |
| 7647 hsa-mir-1180 | ADCY3    | 0.327567308 mirna_pc |
| 7648 hsa-mir-1180 | C1orf96  | 0.316907797 mirna_pc |
| 7649 hsa-mir-1180 | NT5DC2   | 0.369398964 mirna_pc |
| 7650 hsa-mir-1180 | EHMT2    | 0.503254033 mirna_pc |
| 7651 hsa-mir-1180 | C18orf54 | 0.307861838 mirna_pc |
| 7652 hsa-mir-1180 | UBAP2L   | 0.422181285 mirna_pc |
| 7653 hsa-mir-1180 | DEK      | 0.303851033 mirna_pc |
| 7654 hsa-mir-1180 | SFRS9    | 0.320999963 mirna_pc |
| 7655 hsa-mir-1180 | IPO4     | 0.340563525 mirna_pc |
| 7656 hsa-mir-1180 | SIX1     | 0.376166088 mirna_pc |
| 7657 hsa-mir-1180 | RPGRIP1L | 0.352676134 mirna_pc |
| 7658 hsa-mir-1180 | MFSD2A   | 0.302520584 mirna_pc |
| 7659 hsa-mir-1180 | ADORA2B  | 0.363022014 mirna_pc |
| 7660 hsa-mir-1180 | GTF2H4   | 0.449437014 mirna_pc |
| 7661 hsa-mir-1180 | LSM 6.00 | 0.418850298 mirna_pc |
| 7662 hsa-mir-1180 | PRAME    | 0.481553057 mirna_pc |
| 7663 hsa-mir-1180 | THOC3    | 0.300340697 mirna_pc |
| 7664 hsa-mir-1180 | CBX2     | 0.405633178 mirna_pc |
| 7665 hsa-mir-1180 | AZI1     | 0.322377474 mirna_pc |
| 7666 hsa-mir-1180 | FUBP1    | 0.322574844 mirna_pc |
| 7667 hsa-mir-1180 | C7orf27  | 0.3062659 mirna_pc   |

|                   |          |                      |
|-------------------|----------|----------------------|
| 7668 hsa-mir-1180 | WDR74    | 0.392598586 mirna_pc |
| 7669 hsa-mir-1180 | ZBTB9    | 0.322835635 mirna_pc |
| 7670 hsa-mir-1180 | SUV39H1  | 0.314501786 mirna_pc |
| 7671 hsa-mir-1180 | IPO9     | 0.375347416 mirna_pc |
| 7672 hsa-mir-1180 | CSRP2BP  | 0.317011291 mirna_pc |
| 7673 hsa-mir-1180 | SR140    | 0.324870194 mirna_pc |
| 7674 hsa-mir-1180 | TRA2B    | 0.484356729 mirna_pc |
| 7675 hsa-mir-1180 | RSRC1    | 0.44408171 mirna_pc  |
| 7676 hsa-mir-1180 | GAR1     | 0.463544973 mirna_pc |
| 7677 hsa-mir-1180 | C15orf23 | 0.435195617 mirna_pc |
| 7678 hsa-mir-1180 | CDRT4    | 0.409932119 mirna_pc |
| 7679 hsa-mir-1180 | RBM34    | 0.370806927 mirna_pc |
| 7680 hsa-mir-1180 | C3orf21  | 0.451576759 mirna_pc |
| 7681 hsa-mir-1180 | ZNF668   | 0.392064545 mirna_pc |
| 7682 hsa-mir-1180 | IGF2BP2  | 0.303801488 mirna_pc |
| 7683 hsa-mir-1180 | C1QBP    | 0.505374459 mirna_pc |
| 7684 hsa-mir-1180 | SAE1     | 0.300048664 mirna_pc |
| 7685 hsa-mir-1180 | ENOPH1   | 0.319581818 mirna_pc |
| 7686 hsa-mir-1180 | C19orf47 | 0.314288467 mirna_pc |
| 7687 hsa-mir-1180 | MAP6D1   | 0.315520382 mirna_pc |
| 7688 hsa-mir-1180 | C4orf43  | 0.406484065 mirna_pc |
| 7689 hsa-mir-1180 | TGIF1    | 0.316380356 mirna_pc |
| 7690 hsa-mir-1180 | ZNF595   | 0.419914332 mirna_pc |
| 7691 hsa-mir-1180 | YY1      | 0.309133425 mirna_pc |
| 7692 hsa-mir-1180 | C16orf80 | 0.361287508 mirna_pc |
| 7693 hsa-mir-1180 | MYBBP1A  | 0.401746947 mirna_pc |
| 7694 hsa-mir-1180 | C17orf96 | 0.360193952 mirna_pc |
| 7695 hsa-mir-1180 | CXCL1    | 0.332938187 mirna_pc |
| 7696 hsa-mir-1180 | PLEKHG4  | 0.45051783 mirna_pc  |
| 7697 hsa-mir-1180 | CNOT2    | 0.366426565 mirna_pc |
| 7698 hsa-mir-1180 | TMEM223  | 0.347238516 mirna_pc |
| 7699 hsa-mir-1180 | SFPQ     | 0.434585348 mirna_pc |
| 7700 hsa-mir-1180 | CNOT3    | 0.31387304 mirna_pc  |
| 7701 hsa-mir-1180 | GIT1     | 0.319947845 mirna_pc |
| 7702 hsa-mir-1180 | RCOR2    | 0.430938086 mirna_pc |
| 7703 hsa-mir-1180 | RHBDD3   | 0.302780242 mirna_pc |
| 7704 hsa-mir-1180 | MTA2     | 0.444773988 mirna_pc |
| 7705 hsa-mir-1180 | SHMT2    | 0.331212945 mirna_pc |
| 7706 hsa-mir-1180 | HDAC2    | 0.36201562 mirna_pc  |
| 7707 hsa-mir-1180 | PDCD2L   | 0.3690212 mirna_pc   |
| 7708 hsa-mir-1180 | PA2G4P4  | 0.301761237 mirna_pc |
| 7709 hsa-mir-1180 | HAP1     | 0.313758223 mirna_pc |
| 7710 hsa-mir-1180 | CPNE2    | 0.306371647 mirna_pc |
| 7711 hsa-mir-1180 | WDR53    | 0.303040044 mirna_pc |
| 7712 hsa-mir-1180 | ALOX12P2 | 0.404831077 mirna_pc |
| 7713 hsa-mir-1180 | C10orf2  | 0.301746952 mirna_pc |
| 7714 hsa-mir-1180 | POGK     | 0.328614359 mirna_pc |
| 7715 hsa-mir-1180 | RNF7     | 0.380495741 mirna_pc |
| 7716 hsa-mir-1180 | SALL2    | 0.346118914 mirna_pc |
| 7717 hsa-mir-1180 | DCK      | 0.350146697 mirna_pc |
| 7718 hsa-mir-1180 | RNMTL1   | 0.413941191 mirna_pc |
| 7719 hsa-mir-1180 | FAM86C   | 0.361359609 mirna_pc |
| 7720 hsa-mir-1180 | PTCD1    | 0.309877217 mirna_pc |
| 7721 hsa-mir-1180 | CRIP1    | 0.346248966 mirna_pc |

|                   |           |                      |
|-------------------|-----------|----------------------|
| 7722 hsa-mir-1180 | MSH6      | 0.486214252 mirna_pc |
| 7723 hsa-mir-1180 | SOX4      | 0.305714414 mirna_pc |
| 7724 hsa-mir-1180 | C3orf34   | 0.352861279 mirna_pc |
| 7725 hsa-mir-1180 | TAF6L     | 0.484632261 mirna_pc |
| 7726 hsa-mir-1180 | LEF1      | 0.359280625 mirna_pc |
| 7727 hsa-mir-1180 | ACBD6     | 0.463593427 mirna_pc |
| 7728 hsa-mir-1180 | HNRNPA1   | 0.408227221 mirna_pc |
| 7729 hsa-mir-1180 | UBA2      | 0.317037807 mirna_pc |
| 7730 hsa-mir-1180 | CDK2AP1   | 0.399089533 mirna_pc |
| 7731 hsa-mir-1180 | NUDT3     | 0.482090937 mirna_pc |
| 7732 hsa-mir-1180 | ZBED4     | 0.311269926 mirna_pc |
| 7733 hsa-mir-1180 | MEA1      | 0.310742645 mirna_pc |
| 7734 hsa-mir-1180 | MEX3A     | 0.541546791 mirna_pc |
| 7735 hsa-mir-1180 | MOGS      | 0.368379204 mirna_pc |
| 7736 hsa-mir-1180 | BAT1      | 0.345174765 mirna_pc |
| 7737 hsa-mir-1180 | COIL      | 0.348455858 mirna_pc |
| 7738 hsa-mir-1180 | VARS      | 0.33374945 mirna_pc  |
| 7739 hsa-mir-1180 | MRPS12    | 0.374586388 mirna_pc |
| 7740 hsa-mir-1180 | RFC2      | 0.319188226 mirna_pc |
| 7741 hsa-mir-1180 | TAF5      | 0.337663305 mirna_pc |
| 7742 hsa-mir-1180 | TRIM28    | 0.403274756 mirna_pc |
| 7743 hsa-mir-1180 | GTPBP3    | 0.431165831 mirna_pc |
| 7744 hsa-mir-1180 | C16orf88  | 0.483081155 mirna_pc |
| 7745 hsa-mir-1180 | B3GALT6   | 0.427552488 mirna_pc |
| 7746 hsa-mir-1180 | APEX1     | 0.390313585 mirna_pc |
| 7747 hsa-mir-1180 | HNRNPA1L2 | 0.412276369 mirna_pc |
| 7748 hsa-mir-1180 | NAA15     | 0.340989472 mirna_pc |
| 7749 hsa-mir-1180 | CBX1      | 0.437930714 mirna_pc |
| 7750 hsa-mir-1180 | EMILIN3   | 0.355242413 mirna_pc |
| 7751 hsa-mir-1180 | YEATS4    | 0.335764977 mirna_pc |
| 7752 hsa-mir-1180 | HMGB1     | 0.312668425 mirna_pc |
| 7753 hsa-mir-1180 | RPS2      | 0.360993937 mirna_pc |
| 7754 hsa-mir-1180 | ZBTB12    | 0.570380462 mirna_pc |
| 7755 hsa-mir-1180 | BCDIN3D   | 0.306944366 mirna_pc |
| 7756 hsa-mir-1180 | C1orf35   | 0.310316485 mirna_pc |
| 7757 hsa-mir-1180 | KLHDC9    | 0.336249392 mirna_pc |
| 7758 hsa-mir-1180 | TGIF2     | 0.361405056 mirna_pc |
| 7759 hsa-mir-1180 | SENP1     | 0.304904405 mirna_pc |
| 7760 hsa-mir-1180 | ERI3      | 0.418688043 mirna_pc |
| 7761 hsa-mir-1180 | RCN2      | 0.452124872 mirna_pc |
| 7762 hsa-mir-1180 | THUMP2    | 0.339336995 mirna_pc |
| 7763 hsa-mir-1180 | TARBP2    | 0.468841741 mirna_pc |
| 7764 hsa-mir-1180 | SNHG9     | 0.33683409 mirna_pc  |
| 7765 hsa-mir-1180 | C16orf53  | 0.364341716 mirna_pc |
| 7766 hsa-mir-1180 | NOL10     | 0.444220815 mirna_pc |
| 7767 hsa-mir-1180 | ANAPC1    | 0.310641145 mirna_pc |
| 7768 hsa-mir-1180 | POLE      | 0.334243455 mirna_pc |
| 7769 hsa-mir-1180 | WRNIP1    | 0.418520319 mirna_pc |
| 7770 hsa-mir-1180 | C1orf159  | 0.306029058 mirna_pc |
| 7771 hsa-mir-1180 | CPSF6     | 0.324778558 mirna_pc |
| 7772 hsa-mir-1180 | ERF       | 0.364471845 mirna_pc |
| 7773 hsa-mir-1180 | TAF1B     | 0.409761066 mirna_pc |
| 7774 hsa-mir-1180 | TIMM50    | 0.380609204 mirna_pc |
| 7775 hsa-mir-1180 | TMEM216   | 0.350186637 mirna_pc |

|                   |           |                      |
|-------------------|-----------|----------------------|
| 7776 hsa-mir-1180 | XRCC6BP1  | 0.318575244 mirna_pc |
| 7777 hsa-mir-1180 | ADSL      | 0.350500871 mirna_pc |
| 7778 hsa-mir-1180 | RIOK1     | 0.321659052 mirna_pc |
| 7779 hsa-mir-1180 | RBM14     | 0.312745154 mirna_pc |
| 7780 hsa-mir-1180 | EXOSC9    | 0.449264938 mirna_pc |
| 7781 hsa-mir-1180 | FOXRED2   | 0.316776117 mirna_pc |
| 7782 hsa-mir-1180 | UNG       | 0.336830412 mirna_pc |
| 7783 hsa-mir-1180 | GRK6      | 0.365966903 mirna_pc |
| 7784 hsa-mir-1180 | ZNF598    | 0.353915908 mirna_pc |
| 7785 hsa-mir-1180 | RBMX      | 0.392897762 mirna_pc |
| 7786 hsa-mir-1180 | TELO2     | 0.328405779 mirna_pc |
| 7787 hsa-mir-1180 | TSEN15    | 0.32808737 mirna_pc  |
| 7788 hsa-mir-1180 | CDK16     | 0.346225512 mirna_pc |
| 7789 hsa-mir-1180 | ALKBH2    | 0.373743003 mirna_pc |
| 7790 hsa-mir-1180 | USP10     | 0.337247352 mirna_pc |
| 7791 hsa-mir-1180 | NTHL1     | 0.453318188 mirna_pc |
| 7792 hsa-mir-1180 | TCTEX1D2  | 0.308361614 mirna_pc |
| 7793 hsa-mir-1180 | PYCR2     | 0.353130664 mirna_pc |
| 7794 hsa-mir-1180 | ALKBH5    | 0.532362031 mirna_pc |
| 7795 hsa-mir-1180 | CCDC90A   | 0.318496559 mirna_pc |
| 7796 hsa-mir-1180 | MDC 1.00  | 0.308665423 mirna_pc |
| 7797 hsa-mir-1180 | PRKCSH    | 0.400095835 mirna_pc |
| 7798 hsa-mir-1180 | MLF 2.00  | 0.308013532 mirna_pc |
| 7799 hsa-mir-1180 | SOCS7     | 0.308173346 mirna_pc |
| 7800 hsa-mir-1180 | CTCF      | 0.459360674 mirna_pc |
| 7801 hsa-mir-1180 | MED9      | 0.467211403 mirna_pc |
| 7802 hsa-mir-1180 | RPL39L    | 0.437530354 mirna_pc |
| 7803 hsa-mir-1180 | GPN3      | 0.331301596 mirna_pc |
| 7804 hsa-mir-1180 | ASB3      | 0.306020567 mirna_pc |
| 7805 hsa-mir-1180 | LOC152217 | 0.430739309 mirna_pc |
| 7806 hsa-mir-1180 | IGSF9     | 0.37389549 mirna_pc  |
| 7807 hsa-mir-1180 | LOC440905 | 0.372960552 mirna_pc |
| 7808 hsa-mir-1180 | PRKX      | 0.331535355 mirna_pc |
| 7809 hsa-mir-1180 | GPATCH2   | 0.341850438 mirna_pc |
| 7810 hsa-mir-1180 | DNAJC14   | 0.377000839 mirna_pc |
| 7811 hsa-mir-1180 | FIP1L1    | 0.346089341 mirna_pc |
| 7812 hsa-mir-1180 | TFB2M     | 0.343957002 mirna_pc |
| 7813 hsa-mir-1180 | KDM2B     | 0.316987527 mirna_pc |
| 7814 hsa-mir-1180 | TRAP1     | 0.356134644 mirna_pc |
| 7815 hsa-mir-1180 | GTF3C2    | 0.310332557 mirna_pc |
| 7816 hsa-mir-1180 | MAGEF1    | 0.569583329 mirna_pc |
| 7817 hsa-mir-1180 | OSTC      | 0.388685391 mirna_pc |
| 7818 hsa-mir-1180 | WDR90     | 0.328680057 mirna_pc |
| 7819 hsa-mir-1180 | APOA1BP   | 0.34552663 mirna_pc  |
| 7820 hsa-mir-1180 | SUPT3H    | 0.369332548 mirna_pc |
| 7821 hsa-mir-1180 | IMP4      | 0.332969025 mirna_pc |
| 7822 hsa-mir-1180 | SOX12     | 0.373468189 mirna_pc |
| 7823 hsa-mir-1180 | SMARCB1   | 0.405720094 mirna_pc |
| 7824 hsa-mir-1180 | PYG02     | 0.318154088 mirna_pc |
| 7825 hsa-mir-1180 | RPA1      | 0.403963706 mirna_pc |
| 7826 hsa-mir-1180 | FAM92A1   | 0.309708692 mirna_pc |
| 7827 hsa-mir-1180 | ZNF639    | 0.537702986 mirna_pc |
| 7828 hsa-mir-1180 | TTC5      | 0.308980823 mirna_pc |
| 7829 hsa-mir-1180 | TBCCD1    | 0.342943721 mirna_pc |

|                   |           |                      |
|-------------------|-----------|----------------------|
| 7830 hsa-mir-1180 | ITPRIPL1  | 0.340260257 mirna_pc |
| 7831 hsa-mir-1180 | MSTO1     | 0.351318418 mirna_pc |
| 7832 hsa-mir-1180 | FOXK2     | 0.34028808 mirna_pc  |
| 7833 hsa-mir-1180 | ANAPC10   | 0.340654943 mirna_pc |
| 7834 hsa-mir-1180 | ABT1      | 0.303898627 mirna_pc |
| 7835 hsa-mir-1180 | LDHB      | 0.314774124 mirna_pc |
| 7836 hsa-mir-1180 | UBXN7     | 0.394625821 mirna_pc |
| 7837 hsa-mir-1180 | FXR2      | 0.351441985 mirna_pc |
| 7838 hsa-mir-1180 | FAM189B   | 0.383484071 mirna_pc |
| 7839 hsa-mir-1180 | MKRN3     | 0.372754917 mirna_pc |
| 7840 hsa-mir-1180 | LRPPRC    | 0.310448041 mirna_pc |
| 7841 hsa-mir-1180 | LOC401010 | 0.366350926 mirna_pc |
| 7842 hsa-mir-1180 | DVL3      | 0.40312864 mirna_pc  |
| 7843 hsa-mir-1180 | NUP133    | 0.31887483 mirna_pc  |
| 7844 hsa-mir-1180 | LPHN3     | 0.305177991 mirna_pc |
| 7845 hsa-mir-1180 | BCL7A     | 0.460276445 mirna_pc |
| 7846 hsa-mir-1180 | DVL2      | 0.456715493 mirna_pc |
| 7847 hsa-mir-1180 | TRPA1     | 0.310310797 mirna_pc |
| 7848 hsa-mir-1180 | ZNF286A   | 0.536605727 mirna_pc |
| 7849 hsa-mir-1180 | SUMO3     | 0.30647773 mirna_pc  |
| 7850 hsa-mir-1180 | MRPL21    | 0.509837406 mirna_pc |
| 7851 hsa-mir-1180 | NLE1      | 0.418112187 mirna_pc |
| 7852 hsa-mir-1180 | COX10     | 0.3636898 mirna_pc   |
| 7853 hsa-mir-1180 | FXR1      | 0.375359834 mirna_pc |
| 7854 hsa-mir-1180 | DMRTA2    | 0.328634412 mirna_pc |
| 7855 hsa-mir-1180 | CHST10    | 0.359039012 mirna_pc |
| 7856 hsa-mir-1180 | PSPH      | 0.306386281 mirna_pc |
| 7857 hsa-mir-1180 | PRR3      | 0.414526542 mirna_pc |
| 7858 hsa-mir-1180 | MGC72080  | 0.315986278 mirna_pc |
| 7859 hsa-mir-1180 | MCF2L2    | 0.330368766 mirna_pc |
| 7860 hsa-mir-1180 | CNTR0B    | 0.379309729 mirna_pc |
| 7861 hsa-mir-1180 | TRMT61B   | 0.430304183 mirna_pc |
| 7862 hsa-mir-1180 | TSFM      | 0.394146205 mirna_pc |
| 7863 hsa-mir-1180 | RAD1      | 0.302121148 mirna_pc |
| 7864 hsa-mir-1180 | UBFD1     | 0.387103322 mirna_pc |
| 7865 hsa-mir-1180 | SEMA4F    | 0.338770151 mirna_pc |
| 7866 hsa-mir-1180 | APITD1    | 0.304323919 mirna_pc |
| 7867 hsa-mir-1180 | GANAB     | 0.380442388 mirna_pc |
| 7868 hsa-mir-1180 | GRSF1     | 0.371220565 mirna_pc |
| 7869 hsa-mir-1180 | CHD3      | 0.304161415 mirna_pc |
| 7870 hsa-mir-1180 | ZNF286B   | 0.492153166 mirna_pc |
| 7871 hsa-mir-1180 | DDX20     | 0.342008508 mirna_pc |
| 7872 hsa-mir-1180 | DCUN1D1   | 0.449163387 mirna_pc |
| 7873 hsa-mir-1180 | Clorf109  | 0.342509755 mirna_pc |
| 7874 hsa-mir-1180 | ALDH3A2   | 0.439376612 mirna_pc |
| 7875 hsa-mir-1180 | PIGX      | 0.402833066 mirna_pc |
| 7876 hsa-mir-1180 | MTA1      | 0.349423222 mirna_pc |
| 7877 hsa-mir-1180 | SLC47A1   | 0.394716477 mirna_pc |
| 7878 hsa-mir-1180 | DPH1      | 0.382467448 mirna_pc |
| 7879 hsa-mir-1180 | CRK       | 0.302150518 mirna_pc |
| 7880 hsa-mir-1180 | PFN2      | 0.403852261 mirna_pc |
| 7881 hsa-mir-1180 | PFKM      | 0.316956877 mirna_pc |
| 7882 hsa-mir-1180 | PSPC1     | 0.356284155 mirna_pc |
| 7883 hsa-mir-1180 | INTU      | 0.35217077 mirna_pc  |

|                   |           |                      |
|-------------------|-----------|----------------------|
| 7884 hsa-mir-1180 | COPZ1     | 0.306715626 mirna_pc |
| 7885 hsa-mir-1180 | SMAD1     | 0.322099057 mirna_pc |
| 7886 hsa-mir-1180 | ATP6V1E2  | 0.387364375 mirna_pc |
| 7887 hsa-mir-1180 | LMLN      | 0.346399676 mirna_pc |
| 7888 hsa-mir-1180 | CCNB1IP1  | 0.381213875 mirna_pc |
| 7889 hsa-mir-1180 | NHP2L1    | 0.353366824 mirna_pc |
| 7890 hsa-mir-1180 | MAPKAPK5  | 0.300980291 mirna_pc |
| 7891 hsa-mir-1180 | RBMXL1    | 0.309416706 mirna_pc |
| 7892 hsa-mir-1180 | SMCR8     | 0.326870405 mirna_pc |
| 7893 hsa-mir-1180 | GMCL1     | 0.310782677 mirna_pc |
| 7894 hsa-mir-1180 | GPR3      | 0.327844121 mirna_pc |
| 7895 hsa-mir-1180 | E2F6      | 0.372568017 mirna_pc |
| 7896 hsa-mir-1180 | NOL7      | 0.337627544 mirna_pc |
| 7897 hsa-mir-1180 | PRPSAP2   | 0.648026177 mirna_pc |
| 7898 hsa-mir-1180 | SENP3     | 0.467341185 mirna_pc |
| 7899 hsa-mir-1180 | CPSF4     | 0.325697064 mirna_pc |
| 7900 hsa-mir-1180 | B4GALT3   | 0.431546505 mirna_pc |
| 7901 hsa-mir-1180 | SNRNP200  | 0.309230084 mirna_pc |
| 7902 hsa-mir-1180 | SCLY      | 0.351345083 mirna_pc |
| 7903 hsa-mir-1180 | STARD7    | 0.404915447 mirna_pc |
| 7904 hsa-mir-1180 | GPR125    | 0.317454932 mirna_pc |
| 7905 hsa-mir-1180 | NUP35     | 0.313083107 mirna_pc |
| 7906 hsa-mir-1180 | SLC19A1   | 0.305485662 mirna_pc |
| 7907 hsa-mir-1180 | TFAM      | 0.307882575 mirna_pc |
| 7908 hsa-mir-1180 | TTC27     | 0.337914444 mirna_pc |
| 7909 hsa-mir-1180 | DHRS13    | 0.407291856 mirna_pc |
| 7910 hsa-mir-1180 | MCCC1     | 0.472297098 mirna_pc |
| 7911 hsa-mir-1180 | ZNF624    | 0.351341652 mirna_pc |
| 7912 hsa-mir-1180 | C18orf55  | 0.309369806 mirna_pc |
| 7913 hsa-mir-1180 | MRPS34    | 0.317493056 mirna_pc |
| 7914 hsa-mir-1180 | LOC222699 | 0.334533533 mirna_pc |
| 7915 hsa-mir-1180 | KCNMB3    | 0.362466796 mirna_pc |
| 7916 hsa-mir-1180 | DHX57     | 0.45319435 mirna_pc  |
| 7917 hsa-mir-1180 | ALX3      | 0.339337063 mirna_pc |
| 7918 hsa-mir-1180 | AAAS      | 0.463773737 mirna_pc |
| 7919 hsa-mir-1180 | UBQLN4    | 0.388436458 mirna_pc |
| 7920 hsa-mir-1180 | C19orf54  | 0.314673893 mirna_pc |
| 7921 hsa-mir-1180 | MTFMT     | 0.331442328 mirna_pc |
| 7922 hsa-mir-1180 | SUPT7L    | 0.307665422 mirna_pc |
| 7923 hsa-mir-1180 | PEMT      | 0.498377226 mirna_pc |
| 7924 hsa-mir-1180 | SMUG1     | 0.300372762 mirna_pc |
| 7925 hsa-mir-1180 | LIG3      | 0.379644273 mirna_pc |
| 7926 hsa-mir-1180 | KIAA0195  | 0.32406182 mirna_pc  |
| 7927 hsa-mir-1180 | MRPS26    | 0.431693981 mirna_pc |
| 7928 hsa-mir-1180 | MRPL30    | 0.418890878 mirna_pc |
| 7929 hsa-mir-1180 | SETD1A    | 0.315316332 mirna_pc |
| 7930 hsa-mir-1180 | GFM1      | 0.326101417 mirna_pc |
| 7931 hsa-mir-1180 | CWC27     | 0.347053582 mirna_pc |
| 7932 hsa-mir-1180 | PELP1     | 0.501469527 mirna_pc |
| 7933 hsa-mir-1180 | ACPL2     | 0.323795087 mirna_pc |
| 7934 hsa-mir-1180 | ZNF692    | 0.355234315 mirna_pc |
| 7935 hsa-mir-1180 | SFRS7     | 0.398010284 mirna_pc |
| 7936 hsa-mir-1180 | C9orf100  | 0.325441642 mirna_pc |
| 7937 hsa-mir-1180 | C18orf10  | 0.3405006 mirna_pc   |

|      |              |           |             |          |
|------|--------------|-----------|-------------|----------|
| 7938 | hsa-mir-1180 | TRMT2A    | 0.375620698 | mirna_pc |
| 7939 | hsa-mir-1180 | PCBP2     | 0.323245945 | mirna_pc |
| 7940 | hsa-mir-1180 | UBE2O     | 0.326085383 | mirna_pc |
| 7941 | hsa-mir-1180 | NFXL1     | 0.322080485 | mirna_pc |
| 7942 | hsa-mir-1180 | TRIT1     | 0.317429042 | mirna_pc |
| 7943 | hsa-mir-1180 | PFAS      | 0.420182554 | mirna_pc |
| 7944 | hsa-mir-1180 | PET112L   | 0.353603649 | mirna_pc |
| 7945 | hsa-mir-1180 | SARS2     | 0.490287318 | mirna_pc |
| 7946 | hsa-mir-1180 | C10orf35  | 0.332737985 | mirna_pc |
| 7947 | hsa-mir-1180 | HLTF      | 0.340186974 | mirna_pc |
| 7948 | hsa-mir-1180 | BLMH      | 0.331947628 | mirna_pc |
| 7949 | hsa-mir-1180 | NUP88     | 0.392709066 | mirna_pc |
| 7950 | hsa-mir-1180 | BAT2      | 0.308001955 | mirna_pc |
| 7951 | hsa-mir-1180 | RBM19     | 0.330277639 | mirna_pc |
| 7952 | hsa-mir-1180 | ERCC3     | 0.308773027 | mirna_pc |
| 7953 | hsa-mir-1180 | DHX33     | 0.465061031 | mirna_pc |
| 7954 | hsa-mir-1180 | FADS2     | 0.335168568 | mirna_pc |
| 7955 | hsa-mir-1180 | RPUSD2    | 0.389126316 | mirna_pc |
| 7956 | hsa-mir-1180 | ABCF3     | 0.349706641 | mirna_pc |
| 7957 | hsa-mir-1180 | EIF2B5    | 0.469561094 | mirna_pc |
| 7958 | hsa-mir-1180 | NUP153    | 0.437006315 | mirna_pc |
| 7959 | hsa-mir-1180 | NIPSNAP1  | 0.351193439 | mirna_pc |
| 7960 | hsa-mir-1180 | PARL      | 0.43476313  | mirna_pc |
| 7961 | hsa-mir-1180 | PTOV1     | 0.349456131 | mirna_pc |
| 7962 | hsa-mir-1180 | C17orf80  | 0.343998861 | mirna_pc |
| 7963 | hsa-mir-1180 | ANKRD23   | 0.308054128 | mirna_pc |
| 7964 | hsa-mir-1180 | ARHGEF19  | 0.350777528 | mirna_pc |
| 7965 | hsa-mir-1180 | C17orf75  | 0.440832953 | mirna_pc |
| 7966 | hsa-mir-1180 | TMEM93    | 0.36638511  | mirna_pc |
| 7967 | hsa-mir-1180 | UST       | 0.331332801 | mirna_pc |
| 7968 | hsa-mir-1180 | RPL35A    | 0.378784304 | mirna_pc |
| 7969 | hsa-mir-1180 | FBRSL1    | 0.345053929 | mirna_pc |
| 7970 | hsa-mir-1180 | NFATC3    | 0.361147795 | mirna_pc |
| 7971 | hsa-mir-1180 | FUZ       | 0.309499845 | mirna_pc |
| 7972 | hsa-mir-1180 | ATXN10    | 0.404837881 | mirna_pc |
| 7973 | hsa-mir-1180 | NPRL3     | 0.365153458 | mirna_pc |
| 7974 | hsa-mir-1180 | ZNF771    | 0.504557512 | mirna_pc |
| 7975 | hsa-mir-1180 | EEF1E1    | 0.420824939 | mirna_pc |
| 7976 | hsa-mir-1180 | PRUNE     | 0.310592708 | mirna_pc |
| 7977 | hsa-mir-1180 | ZSWIM7    | 0.481676806 | mirna_pc |
| 7978 | hsa-mir-1180 | EIF4G1    | 0.321329837 | mirna_pc |
| 7979 | hsa-mir-1180 | TCTN2     | 0.323365928 | mirna_pc |
| 7980 | hsa-mir-1180 | C14orf104 | 0.36969984  | mirna_pc |
| 7981 | hsa-mir-1180 | POLR2C    | 0.312617395 | mirna_pc |
| 7982 | hsa-mir-1180 | C12orf10  | 0.356402567 | mirna_pc |
| 7983 | hsa-mir-1180 | TOP3A     | 0.519354635 | mirna_pc |
| 7984 | hsa-mir-1180 | UBE2M     | 0.305426183 | mirna_pc |
| 7985 | hsa-mir-1180 | C2orf44   | 0.407770584 | mirna_pc |
| 7986 | hsa-mir-1180 | RING1     | 0.327606497 | mirna_pc |
| 7987 | hsa-mir-1180 | PSMB6     | 0.349387101 | mirna_pc |
| 7988 | hsa-mir-1180 | SEPHS1    | 0.49904575  | mirna_pc |
| 7989 | hsa-mir-1180 | SHISA2    | 0.305636947 | mirna_pc |
| 7990 | hsa-mir-1180 | RMND1     | 0.331426887 | mirna_pc |
| 7991 | hsa-mir-1180 | RYK       | 0.375402569 | mirna_pc |



|                   |           |                      |
|-------------------|-----------|----------------------|
| 7992 hsa-mir-1180 | GEMIN5    | 0.319649822 mirna_pc |
| 7993 hsa-mir-1180 | TMEM183A  | 0.30134592 mirna_pc  |
| 7994 hsa-mir-1180 | MLST8     | 0.384226128 mirna_pc |
| 7995 hsa-mir-1180 | C16orf13  | 0.313556648 mirna_pc |
| 7996 hsa-mir-1180 | TMEM11    | 0.400147318 mirna_pc |
| 7997 hsa-mir-1180 | AGBL5     | 0.445292696 mirna_pc |
| 7998 hsa-mir-1180 | PHB2      | 0.349538865 mirna_pc |
| 7999 hsa-mir-1180 | ISYNA1    | 0.333137966 mirna_pc |
| 8000 hsa-mir-1180 | MYL6B     | 0.478096588 mirna_pc |
| 8001 hsa-mir-1180 | PWP2      | 0.367524353 mirna_pc |
| 8002 hsa-mir-1180 | PDCD7     | 0.357153229 mirna_pc |
| 8003 hsa-mir-1180 | CPSF7     | 0.385331938 mirna_pc |
| 8004 hsa-mir-1180 | SENP5     | 0.353753427 mirna_pc |
| 8005 hsa-mir-1180 | DTX3      | 0.364524998 mirna_pc |
| 8006 hsa-mir-1180 | TEAD2     | 0.30725096 mirna_pc  |
| 8007 hsa-mir-1180 | NARS2     | 0.330086916 mirna_pc |
| 8008 hsa-mir-1180 | ZFP1      | 0.39040816 mirna_pc  |
| 8009 hsa-mir-1180 | NME4      | 0.398613892 mirna_pc |
| 8010 hsa-mir-1180 | LYRM4     | 0.529809363 mirna_pc |
| 8011 hsa-mir-1180 | RNF41     | 0.371948705 mirna_pc |
| 8012 hsa-mir-1180 | BCL11A    | 0.3365972 mirna_pc   |
| 8013 hsa-mir-1180 | ZNF496    | 0.392684006 mirna_pc |
| 8014 hsa-mir-1180 | C4orf27   | 0.371036031 mirna_pc |
| 8015 hsa-mir-1180 | DDX28     | 0.369942201 mirna_pc |
| 8016 hsa-mir-1180 | USP21     | 0.511722421 mirna_pc |
| 8017 hsa-mir-1180 | ALMS1     | 0.330997485 mirna_pc |
| 8018 hsa-mir-1180 | SLC25A11  | 0.39162615 mirna_pc  |
| 8019 hsa-mir-1180 | ZNF74     | 0.395731047 mirna_pc |
| 8020 hsa-mir-1180 | METT10D   | 0.309613173 mirna_pc |
| 8021 hsa-mir-1180 | ANP32A    | 0.376730614 mirna_pc |
| 8022 hsa-mir-1180 | RNF121    | 0.315951973 mirna_pc |
| 8023 hsa-mir-1180 | CPT1A     | 0.369101976 mirna_pc |
| 8024 hsa-mir-1180 | SUPV3L1   | 0.371707974 mirna_pc |
| 8025 hsa-mir-1180 | GAL       | 0.315320785 mirna_pc |
| 8026 hsa-mir-1180 | TSNAX     | 0.3183682 mirna_pc   |
| 8027 hsa-mir-1180 | KHDC1     | 0.301972204 mirna_pc |
| 8028 hsa-mir-1180 | C2orf76   | 0.359869015 mirna_pc |
| 8029 hsa-mir-1180 | C17orf81  | 0.439926254 mirna_pc |
| 8030 hsa-mir-1180 | PHF23     | 0.313833542 mirna_pc |
| 8031 hsa-mir-1180 | PPP5C     | 0.312087792 mirna_pc |
| 8032 hsa-mir-1180 | UBE2J2    | 0.349194802 mirna_pc |
| 8033 hsa-mir-1180 | LRFN1     | 0.31766129 mirna_pc  |
| 8034 hsa-mir-1180 | PEX5      | 0.355399781 mirna_pc |
| 8035 hsa-mir-1180 | RABL2A    | 0.32757974 mirna_pc  |
| 8036 hsa-mir-1180 | LCMT2     | 0.330168659 mirna_pc |
| 8037 hsa-mir-1180 | RRP1B     | 0.340600428 mirna_pc |
| 8038 hsa-mir-1180 | C1orf156  | 0.313405749 mirna_pc |
| 8039 hsa-mir-1180 | UBTF      | 0.366049198 mirna_pc |
| 8040 hsa-mir-1180 | ABCC1     | 0.30005529 mirna_pc  |
| 8041 hsa-mir-1180 | NSL1      | 0.300970276 mirna_pc |
| 8042 hsa-mir-1180 | ZNF428    | 0.317933622 mirna_pc |
| 8043 hsa-mir-1180 | ELAC2     | 0.306148919 mirna_pc |
| 8044 hsa-mir-1180 | LOC400657 | 0.303857538 mirna_pc |
| 8045 hsa-mir-1180 | PTPLAD1   | 0.319641233 mirna_pc |

|                   |          |                      |
|-------------------|----------|----------------------|
| 8046 hsa-mir-1180 | HNRNPA0  | 0.377415899 mirna_pc |
| 8047 hsa-mir-1180 | SNAP47   | 0.320744713 mirna_pc |
| 8048 hsa-mir-1180 | MORN2    | 0.353986872 mirna_pc |
| 8049 hsa-mir-1180 | C12orf41 | 0.319450198 mirna_pc |
| 8050 hsa-mir-1180 | NAIF1    | 0.319100965 mirna_pc |
| 8051 hsa-mir-1180 | C11orf59 | 0.307251674 mirna_pc |
| 8052 hsa-mir-1180 | TFDP2    | 0.387014361 mirna_pc |
| 8053 hsa-mir-1180 | MLLT11   | 0.327621849 mirna_pc |
| 8054 hsa-mir-1180 | FAM18B   | 0.469949593 mirna_pc |
| 8055 hsa-mir-1180 | CCNJ     | 0.324839388 mirna_pc |
| 8056 hsa-mir-1180 | IFT122   | 0.315751215 mirna_pc |
| 8057 hsa-mir-1180 | PRPF8    | 0.31055461 mirna_pc  |
| 8058 hsa-mir-1180 | MTERF    | 0.302346938 mirna_pc |
| 8059 hsa-mir-1180 | SBK1     | 0.399803655 mirna_pc |
| 8060 hsa-mir-1180 | PABPC4L  | 0.356491787 mirna_pc |
| 8061 hsa-mir-1180 | HSPA9    | 0.340450663 mirna_pc |
| 8062 hsa-mir-1180 | KBTBD6   | 0.300255434 mirna_pc |
| 8063 hsa-mir-1180 | THNSL1   | 0.370216479 mirna_pc |
| 8064 hsa-mir-1180 | USP13    | 0.398083175 mirna_pc |
| 8065 hsa-mir-1180 | GALNT14  | 0.4710145 mirna_pc   |
| 8066 hsa-mir-1180 | TSR1     | 0.395165155 mirna_pc |
| 8067 hsa-mir-1180 | DNM1P35  | 0.324129421 mirna_pc |
| 8068 hsa-mir-1180 | DRG2     | 0.509128494 mirna_pc |
| 8069 hsa-mir-1180 | SCO1     | 0.316315786 mirna_pc |
| 8070 hsa-mir-1180 | SLC25A33 | 0.40739122 mirna_pc  |
| 8071 hsa-mir-1180 | NGFRAP1  | 0.325661812 mirna_pc |
| 8072 hsa-mir-1180 | MSI1     | 0.353644502 mirna_pc |
| 8073 hsa-mir-1180 | CLPB     | 0.45251316 mirna_pc  |
| 8074 hsa-mir-1180 | DAK      | 0.353779526 mirna_pc |
| 8075 hsa-mir-1180 | ZNF740   | 0.349982292 mirna_pc |
| 8076 hsa-mir-1180 | CUL7     | 0.301521286 mirna_pc |
| 8077 hsa-mir-1180 | PACRGL   | 0.308571976 mirna_pc |
| 8078 hsa-mir-1180 | DDX51    | 0.326190121 mirna_pc |
| 8079 hsa-mir-1180 | PBX2     | 0.3702852 mirna_pc   |
| 8080 hsa-mir-1180 | NUBP2    | 0.324127733 mirna_pc |
| 8081 hsa-mir-1180 | ZNF232   | 0.417858942 mirna_pc |
| 8082 hsa-mir-1180 | SENP2    | 0.373260651 mirna_pc |
| 8083 hsa-mir-1180 | ZBTB39   | 0.421348778 mirna_pc |
| 8084 hsa-mir-1180 | NRCAM    | 0.340791613 mirna_pc |
| 8085 hsa-mir-1180 | ARAP1    | 0.330064602 mirna_pc |
| 8086 hsa-mir-1180 | METTL12  | 0.387532898 mirna_pc |
| 8087 hsa-mir-1180 | ENO3     | 0.450105935 mirna_pc |
| 8088 hsa-mir-1180 | RPAIN    | 0.472015235 mirna_pc |
| 8089 hsa-mir-1180 | DTNB     | 0.312184343 mirna_pc |
| 8090 hsa-mir-1180 | TRIM16L  | 0.33324521 mirna_pc  |
| 8091 hsa-mir-1180 | FAM169A  | 0.328973961 mirna_pc |
| 8092 hsa-mir-1180 | PIK3CA   | 0.331602659 mirna_pc |
| 8093 hsa-mir-1180 | PPOX     | 0.376751469 mirna_pc |
| 8094 hsa-mir-1180 | GTF2IP1  | 0.337240461 mirna_pc |
| 8095 hsa-mir-1180 | MRPL1    | 0.304442242 mirna_pc |
| 8096 hsa-mir-1180 | C21orf91 | 0.325543572 mirna_pc |
| 8097 hsa-mir-1180 | MYCL1    | 0.308822346 mirna_pc |
| 8098 hsa-mir-1180 | SOD1     | 0.322083886 mirna_pc |
| 8099 hsa-mir-1180 | SMYD4    | 0.329319275 mirna_pc |

|                   |            |                      |
|-------------------|------------|----------------------|
| 8100 hsa-mir-1180 | CIAO1      | 0.309747913 mirna_pc |
| 8101 hsa-mir-1180 | C2orf3     | 0.321153196 mirna_pc |
| 8102 hsa-mir-1180 | THAP4      | 0.376936952 mirna_pc |
| 8103 hsa-mir-1180 | TUT1       | 0.312753281 mirna_pc |
| 8104 hsa-mir-1180 | CHD4       | 0.322440803 mirna_pc |
| 8105 hsa-mir-1180 | LYZ        | 0.348581938 mirna_pc |
| 8106 hsa-mir-1180 | GFER       | 0.305929377 mirna_pc |
| 8107 hsa-mir-1180 | ACOT13     | 0.307205696 mirna_pc |
| 8108 hsa-mir-1180 | C21orf56   | 0.32028196 mirna_pc  |
| 8109 hsa-mir-1180 | RRP7B      | 0.419067817 mirna_pc |
| 8110 hsa-mir-1180 | DNAJC19    | 0.531360887 mirna_pc |
| 8111 hsa-mir-1180 | CCDC157    | 0.329824422 mirna_pc |
| 8112 hsa-mir-1180 | KILLIN     | 0.302473575 mirna_pc |
| 8113 hsa-mir-1180 | SCML2      | 0.31609001 mirna_pc  |
| 8114 hsa-mir-1180 | FAM18B2    | 0.555217531 mirna_pc |
| 8115 hsa-mir-1180 | NMNAT3     | 0.304693681 mirna_pc |
| 8116 hsa-mir-1180 | MRPL19     | 0.35882959 mirna_pc  |
| 8117 hsa-mir-1180 | HSF2       | 0.30708581 mirna_pc  |
| 8118 hsa-mir-1180 | ZNF18      | 0.314682263 mirna_pc |
| 8119 hsa-mir-1180 | TOMM20     | 0.419130762 mirna_pc |
| 8120 hsa-mir-1180 | CHCHD6     | 0.369718781 mirna_pc |
| 8121 hsa-mir-1180 | ETV5       | 0.499746488 mirna_pc |
| 8122 hsa-mir-1180 | DACT2      | 0.341479393 mirna_pc |
| 8123 hsa-mir-1180 | B9D1       | 0.60375444 mirna_pc  |
| 8124 hsa-mir-1180 | NUCKS1     | 0.306068204 mirna_pc |
| 8125 hsa-mir-1180 | KIAA1430   | 0.308711752 mirna_pc |
| 8126 hsa-mir-1180 | EXOSC6     | 0.320808234 mirna_pc |
| 8127 hsa-mir-1180 | PLRG1      | 0.321013455 mirna_pc |
| 8128 hsa-mir-1180 | AADAT      | 0.396341331 mirna_pc |
| 8129 hsa-mir-1180 | IGHMBP2    | 0.385408541 mirna_pc |
| 8130 hsa-mir-1180 | RAI1       | 0.410685154 mirna_pc |
| 8131 hsa-mir-1180 | FDX1L      | 0.321939522 mirna_pc |
| 8132 hsa-mir-1180 | THAP11     | 0.308300432 mirna_pc |
| 8133 hsa-mir-1180 | ACTR3B     | 0.333225776 mirna_pc |
| 8134 hsa-mir-1180 | ZNF48      | 0.481364783 mirna_pc |
| 8135 hsa-mir-1180 | PRR22      | 0.423614697 mirna_pc |
| 8136 hsa-mir-1180 | C11orf51   | 0.35035898 mirna_pc  |
| 8137 hsa-mir-1180 | BAT4       | 0.313118804 mirna_pc |
| 8138 hsa-mir-1180 | DDB1       | 0.48927801 mirna_pc  |
| 8139 hsa-mir-1180 | KLHDC3     | 0.322150692 mirna_pc |
| 8140 hsa-mir-1180 | SERF1A     | 0.326881878 mirna_pc |
| 8141 hsa-mir-1180 | PLD6       | 0.362738197 mirna_pc |
| 8142 hsa-mir-1180 | GEMIN4     | 0.402774706 mirna_pc |
| 8143 hsa-mir-1180 | HDDC2      | 0.312835179 mirna_pc |
| 8144 hsa-mir-1180 | B4GALNT4   | 0.433245458 mirna_pc |
| 8145 hsa-mir-1180 | PRMT6      | 0.343383462 mirna_pc |
| 8146 hsa-mir-1180 | LOC401397  | 0.330236596 mirna_pc |
| 8147 hsa-mir-1180 | HSDL1      | 0.354721755 mirna_pc |
| 8148 hsa-mir-1180 | C21orf119  | 0.332744796 mirna_pc |
| 8149 hsa-mir-1180 | H2AFY2     | 0.454999047 mirna_pc |
| 8150 hsa-mir-1180 | NCRNA00188 | 0.430083536 mirna_pc |
| 8151 hsa-mir-1180 | EPHB3      | 0.31523238 mirna_pc  |
| 8152 hsa-mir-1180 | MRPS23     | 0.392982864 mirna_pc |
| 8153 hsa-mir-1180 | SLC27A5    | 0.330427424 mirna_pc |

|                   |          |                      |
|-------------------|----------|----------------------|
| 8154 hsa-mir-1180 | AARSD1   | 0.307371047 mirna_pc |
| 8155 hsa-mir-1180 | TMED10   | 0.316493618 mirna_pc |
| 8156 hsa-mir-1180 | MIS12    | 0.342760711 mirna_pc |
| 8157 hsa-mir-1180 | MLF 1.00 | 0.337651491 mirna_pc |
| 8158 hsa-mir-1180 | BOD1     | 0.352128176 mirna_pc |
| 8159 hsa-mir-1180 | TMEM14B  | 0.305829352 mirna_pc |
| 8160 hsa-mir-1180 | SMARCA1  | 0.373300052 mirna_pc |
| 8161 hsa-mir-1180 | SCHIP1   | 0.347960724 mirna_pc |
| 8162 hsa-mir-1180 | KIAA0114 | 0.326075304 mirna_pc |
| 8163 hsa-mir-1180 | VPS37D   | 0.427069381 mirna_pc |
| 8164 hsa-mir-1180 | SV2A     | 0.335245557 mirna_pc |
| 8165 hsa-mir-1180 | NT5M     | 0.479039605 mirna_pc |
| 8166 hsa-mir-1180 | ZNF77    | 0.361003589 mirna_pc |
| 8167 hsa-mir-1180 | SEMA4C   | 0.339868446 mirna_pc |
| 8168 hsa-mir-1180 | THOC5    | 0.342569073 mirna_pc |
| 8169 hsa-mir-1180 | EFNB3    | 0.38303316 mirna_pc  |
| 8170 hsa-mir-1180 | SSR1     | 0.314773314 mirna_pc |
| 8171 hsa-mir-1180 | RPAP1    | 0.326988177 mirna_pc |
| 8172 hsa-mir-1180 | MAFG     | 0.303924191 mirna_pc |
| 8173 hsa-mir-1180 | CENPV    | 0.334781074 mirna_pc |
| 8174 hsa-mir-1180 | VANGL2   | 0.328123457 mirna_pc |
| 8175 hsa-mir-1180 | DNMT3A   | 0.447135851 mirna_pc |
| 8176 hsa-mir-1180 | FAM69B   | 0.350765037 mirna_pc |
| 8177 hsa-mir-1180 | DNAJC11  | 0.301177551 mirna_pc |
| 8178 hsa-mir-1180 | COPS3    | 0.531312997 mirna_pc |
| 8179 hsa-mir-1180 | ACCN2    | 0.353093844 mirna_pc |
| 8180 hsa-mir-1180 | VAR2     | 0.329232846 mirna_pc |
| 8181 hsa-mir-1180 | C12orf73 | 0.345366324 mirna_pc |
| 8182 hsa-mir-1180 | PATZ1    | 0.342029955 mirna_pc |
| 8183 hsa-mir-1180 | TIMM22   | 0.347923819 mirna_pc |
| 8184 hsa-mir-1180 | C3orf33  | 0.395822597 mirna_pc |
| 8185 hsa-mir-1180 | E4F1     | 0.318812636 mirna_pc |
| 8186 hsa-mir-1180 | PIGM     | 0.337251825 mirna_pc |
| 8187 hsa-mir-1180 | SDHC     | 0.318203796 mirna_pc |
| 8188 hsa-mir-1180 | TMEM231  | 0.319501394 mirna_pc |
| 8189 hsa-mir-1180 | ZNF768   | 0.333772881 mirna_pc |
| 8190 hsa-mir-455  | KPNA2    | 0.550210101 mirna_pc |
| 8191 hsa-mir-455  | RCC2     | 0.375142355 mirna_pc |
| 8192 hsa-mir-455  | KIF11    | 0.364125134 mirna_pc |
| 8193 hsa-mir-455  | FOXM1    | 0.438591087 mirna_pc |
| 8194 hsa-mir-455  | RRM2     | 0.473374202 mirna_pc |
| 8195 hsa-mir-455  | SPC24    | 0.394956668 mirna_pc |
| 8196 hsa-mir-455  | CDK1     | 0.384320351 mirna_pc |
| 8197 hsa-mir-455  | PLK1     | 0.465433568 mirna_pc |
| 8198 hsa-mir-455  | UBE2C    | 0.328777356 mirna_pc |
| 8199 hsa-mir-455  | PRC1     | 0.33756456 mirna_pc  |
| 8200 hsa-mir-455  | NUSAP1   | 0.381590683 mirna_pc |
| 8201 hsa-mir-455  | MCM4     | 0.394562522 mirna_pc |
| 8202 hsa-mir-455  | BUB1B    | 0.380341914 mirna_pc |
| 8203 hsa-mir-455  | KIF18B   | 0.430090313 mirna_pc |
| 8204 hsa-mir-455  | ANLN     | 0.308731159 mirna_pc |
| 8205 hsa-mir-455  | KIF2C    | 0.342363561 mirna_pc |
| 8206 hsa-mir-455  | NCAPG    | 0.453307708 mirna_pc |
| 8207 hsa-mir-455  | CDC20    | 0.514646645 mirna_pc |

|      |             |          |             |          |
|------|-------------|----------|-------------|----------|
| 8208 | hsa-mir-455 | CLSPN    | 0.313740937 | mirna_pc |
| 8209 | hsa-mir-455 | CCNA2    | 0.534379886 | mirna_pc |
| 8210 | hsa-mir-455 | CEP55    | 0.397069651 | mirna_pc |
| 8211 | hsa-mir-455 | SPC25    | 0.3347111   | mirna_pc |
| 8212 | hsa-mir-455 | MELK     | 0.329718146 | mirna_pc |
| 8213 | hsa-mir-455 | FANCI    | 0.369654287 | mirna_pc |
| 8214 | hsa-mir-455 | LMNB2    | 0.421726375 | mirna_pc |
| 8215 | hsa-mir-455 | NEK2     | 0.307022841 | mirna_pc |
| 8216 | hsa-mir-455 | MND1     | 0.464669983 | mirna_pc |
| 8217 | hsa-mir-455 | KIF22    | 0.389208523 | mirna_pc |
| 8218 | hsa-mir-455 | FAM49B   | 0.306096442 | mirna_pc |
| 8219 | hsa-mir-455 | NCAPH    | 0.428718535 | mirna_pc |
| 8220 | hsa-mir-455 | GTSE1    | 0.333594644 | mirna_pc |
| 8221 | hsa-mir-455 | KIF23    | 0.331965924 | mirna_pc |
| 8222 | hsa-mir-455 | RAD54L   | 0.353393851 | mirna_pc |
| 8223 | hsa-mir-455 | CENPA    | 0.53027456  | mirna_pc |
| 8224 | hsa-mir-455 | MAD2L1   | 0.473547887 | mirna_pc |
| 8225 | hsa-mir-455 | TIMELESS | 0.385230213 | mirna_pc |
| 8226 | hsa-mir-455 | DLGAP5   | 0.36631062  | mirna_pc |
| 8227 | hsa-mir-455 | TROAP    | 0.338685204 | mirna_pc |
| 8228 | hsa-mir-455 | CCNB1    | 0.488341088 | mirna_pc |
| 8229 | hsa-mir-455 | CDCA5    | 0.38822414  | mirna_pc |
| 8230 | hsa-mir-455 | CDC45    | 0.398501269 | mirna_pc |
| 8231 | hsa-mir-455 | STMN1    | 0.315537508 | mirna_pc |
| 8232 | hsa-mir-455 | EXO1     | 0.307572889 | mirna_pc |
| 8233 | hsa-mir-455 | TK1      | 0.339604942 | mirna_pc |
| 8234 | hsa-mir-455 | CDCA2    | 0.312571286 | mirna_pc |
| 8235 | hsa-mir-455 | UBE2T    | 0.337277907 | mirna_pc |
| 8236 | hsa-mir-455 | CKS2     | 0.383263843 | mirna_pc |
| 8237 | hsa-mir-455 | CKS1B    | 0.475137136 | mirna_pc |
| 8238 | hsa-mir-455 | TUBB     | 0.42879522  | mirna_pc |
| 8239 | hsa-mir-455 | MCM2     | 0.412071402 | mirna_pc |
| 8240 | hsa-mir-455 | ORC1L    | 0.415587904 | mirna_pc |
| 8241 | hsa-mir-455 | UHRF1    | 0.450711325 | mirna_pc |
| 8242 | hsa-mir-455 | CCNF     | 0.393250214 | mirna_pc |
| 8243 | hsa-mir-455 | RACGAP1  | 0.341129512 | mirna_pc |
| 8244 | hsa-mir-455 | PTBP1    | 0.389797021 | mirna_pc |
| 8245 | hsa-mir-455 | CCNB2    | 0.432456851 | mirna_pc |
| 8246 | hsa-mir-455 | PLK4     | 0.445646142 | mirna_pc |
| 8247 | hsa-mir-455 | FANCB    | 0.300279403 | mirna_pc |
| 8248 | hsa-mir-455 | KIF18A   | 0.33493041  | mirna_pc |
| 8249 | hsa-mir-455 | PTTG1    | 0.330750279 | mirna_pc |
| 8250 | hsa-mir-455 | KIF14    | 0.317523613 | mirna_pc |
| 8251 | hsa-mir-455 | HJURP    | 0.350716545 | mirna_pc |
| 8252 | hsa-mir-455 | SKA1     | 0.340382059 | mirna_pc |
| 8253 | hsa-mir-455 | RAD51    | 0.40018635  | mirna_pc |
| 8254 | hsa-mir-455 | BLM      | 0.31987901  | mirna_pc |
| 8255 | hsa-mir-455 | SHCBP1   | 0.370304854 | mirna_pc |
| 8256 | hsa-mir-455 | CKAP2L   | 0.433805362 | mirna_pc |
| 8257 | hsa-mir-455 | DNMT1    | 0.354971696 | mirna_pc |
| 8258 | hsa-mir-455 | PAICS    | 0.442432871 | mirna_pc |
| 8259 | hsa-mir-455 | BIRC5    | 0.417602759 | mirna_pc |
| 8260 | hsa-mir-455 | RCC1     | 0.341170922 | mirna_pc |
| 8261 | hsa-mir-455 | OIP5     | 0.304108689 | mirna_pc |

|                  |          |                      |
|------------------|----------|----------------------|
| 8262 hsa-mir-455 | DTL      | 0.453123098 mirna_pc |
| 8263 hsa-mir-455 | EME1     | 0.392231985 mirna_pc |
| 8264 hsa-mir-455 | CENPK    | 0.335212901 mirna_pc |
| 8265 hsa-mir-455 | AURKB    | 0.499135309 mirna_pc |
| 8266 hsa-mir-455 | GSG2     | 0.407797514 mirna_pc |
| 8267 hsa-mir-455 | CDT1     | 0.354298143 mirna_pc |
| 8268 hsa-mir-455 | MCM10    | 0.4190786 mirna_pc   |
| 8269 hsa-mir-455 | KIF20A   | 0.352482934 mirna_pc |
| 8270 hsa-mir-455 | PSMB2    | 0.377710921 mirna_pc |
| 8271 hsa-mir-455 | SGOL2    | 0.374677878 mirna_pc |
| 8272 hsa-mir-455 | CENPE    | 0.301608973 mirna_pc |
| 8273 hsa-mir-455 | POLQ     | 0.304296999 mirna_pc |
| 8274 hsa-mir-455 | CDCA3    | 0.364868798 mirna_pc |
| 8275 hsa-mir-455 | GINS1    | 0.304516461 mirna_pc |
| 8276 hsa-mir-455 | ALG3     | 0.328956913 mirna_pc |
| 8277 hsa-mir-455 | FEN1     | 0.40904153 mirna_pc  |
| 8278 hsa-mir-455 | ORC6L    | 0.431449244 mirna_pc |
| 8279 hsa-mir-455 | ERH      | 0.378546022 mirna_pc |
| 8280 hsa-mir-455 | C16orf59 | 0.459899478 mirna_pc |
| 8281 hsa-mir-455 | CDKN3    | 0.361914209 mirna_pc |
| 8282 hsa-mir-455 | C17orf53 | 0.32566698 mirna_pc  |
| 8283 hsa-mir-455 | NEIL3    | 0.549820311 mirna_pc |
| 8284 hsa-mir-455 | MCM7     | 0.374809053 mirna_pc |
| 8285 hsa-mir-455 | ACTL6A   | 0.306599418 mirna_pc |
| 8286 hsa-mir-455 | POLD1    | 0.326134524 mirna_pc |
| 8287 hsa-mir-455 | HNRNPL   | 0.360380098 mirna_pc |
| 8288 hsa-mir-455 | SMC4     | 0.315074218 mirna_pc |
| 8289 hsa-mir-455 | PKMYT1   | 0.537417501 mirna_pc |
| 8290 hsa-mir-455 | TUBA1B   | 0.435709277 mirna_pc |
| 8291 hsa-mir-455 | RUVBL1   | 0.384775251 mirna_pc |
| 8292 hsa-mir-455 | POLE2    | 0.32423785 mirna_pc  |
| 8293 hsa-mir-455 | UBE2S    | 0.459986824 mirna_pc |
| 8294 hsa-mir-455 | NCAPD2   | 0.330660609 mirna_pc |
| 8295 hsa-mir-455 | CCT5     | 0.3336085 mirna_pc   |
| 8296 hsa-mir-455 | HNRNPC   | 0.40860248 mirna_pc  |
| 8297 hsa-mir-455 | PPIA     | 0.32775453 mirna_pc  |
| 8298 hsa-mir-455 | TCF3     | 0.432437854 mirna_pc |
| 8299 hsa-mir-455 | CHEK1    | 0.325441603 mirna_pc |
| 8300 hsa-mir-455 | PRR11    | 0.32002837 mirna_pc  |
| 8301 hsa-mir-455 | PATL1    | 0.311212865 mirna_pc |
| 8302 hsa-mir-455 | MCM5     | 0.416429549 mirna_pc |
| 8303 hsa-mir-455 | RAN      | 0.340927331 mirna_pc |
| 8304 hsa-mir-455 | TYMS     | 0.317125026 mirna_pc |
| 8305 hsa-mir-455 | MCM6     | 0.343259236 mirna_pc |
| 8306 hsa-mir-455 | RNASEH2A | 0.412914613 mirna_pc |
| 8307 hsa-mir-455 | EPR1     | 0.354058853 mirna_pc |
| 8308 hsa-mir-455 | BRIP1    | 0.313133307 mirna_pc |
| 8309 hsa-mir-455 | H2AFX    | 0.393496533 mirna_pc |
| 8310 hsa-mir-455 | MTHFD1L  | 0.33688311 mirna_pc  |
| 8311 hsa-mir-455 | PSMD14   | 0.380636123 mirna_pc |
| 8312 hsa-mir-455 | UCK2     | 0.345118913 mirna_pc |
| 8313 hsa-mir-455 | WDHD1    | 0.406006825 mirna_pc |
| 8314 hsa-mir-455 | EFTUD2   | 0.374876278 mirna_pc |
| 8315 hsa-mir-455 | THOC4    | 0.424992906 mirna_pc |

|                  |          |                      |
|------------------|----------|----------------------|
| 8316 hsa-mir-455 | GLT25D1  | 0.429790178 mirna_pc |
| 8317 hsa-mir-455 | CENPN    | 0.310988372 mirna_pc |
| 8318 hsa-mir-455 | PRIM2    | 0.346733515 mirna_pc |
| 8319 hsa-mir-455 | RTKN     | 0.383632946 mirna_pc |
| 8320 hsa-mir-455 | FAM64A   | 0.382162533 mirna_pc |
| 8321 hsa-mir-455 | RANBP1   | 0.439690527 mirna_pc |
| 8322 hsa-mir-455 | MTBP     | 0.338965714 mirna_pc |
| 8323 hsa-mir-455 | SNRPG    | 0.31486797 mirna_pc  |
| 8324 hsa-mir-455 | EIF4A3   | 0.339852025 mirna_pc |
| 8325 hsa-mir-455 | SNRPA    | 0.326236742 mirna_pc |
| 8326 hsa-mir-455 | FUS      | 0.419304854 mirna_pc |
| 8327 hsa-mir-455 | DNAJC9   | 0.505624018 mirna_pc |
| 8328 hsa-mir-455 | TUBA1C   | 0.311058867 mirna_pc |
| 8329 hsa-mir-455 | CHAF1A   | 0.397055687 mirna_pc |
| 8330 hsa-mir-455 | PSMD11   | 0.302875094 mirna_pc |
| 8331 hsa-mir-455 | CENPO    | 0.534484792 mirna_pc |
| 8332 hsa-mir-455 | SERPINH1 | 0.319337697 mirna_pc |
| 8333 hsa-mir-455 | NUDT1    | 0.556467962 mirna_pc |
| 8334 hsa-mir-455 | GINS2    | 0.433813949 mirna_pc |
| 8335 hsa-mir-455 | TEAD4    | 0.427799583 mirna_pc |
| 8336 hsa-mir-455 | CDCA4    | 0.573541779 mirna_pc |
| 8337 hsa-mir-455 | DTYMK    | 0.314978589 mirna_pc |
| 8338 hsa-mir-455 | TMEM206  | 0.325316731 mirna_pc |
| 8339 hsa-mir-455 | E2F7     | 0.402927135 mirna_pc |
| 8340 hsa-mir-455 | MYO1B    | 0.496675569 mirna_pc |
| 8341 hsa-mir-455 | C16orf75 | 0.364722865 mirna_pc |
| 8342 hsa-mir-455 | EBNA1BP2 | 0.355192134 mirna_pc |
| 8343 hsa-mir-455 | NOP2     | 0.348584647 mirna_pc |
| 8344 hsa-mir-455 | TCF19    | 0.31690684 mirna_pc  |
| 8345 hsa-mir-455 | CAD      | 0.389428976 mirna_pc |
| 8346 hsa-mir-455 | CDK2     | 0.434605655 mirna_pc |
| 8347 hsa-mir-455 | CDK4     | 0.359536987 mirna_pc |
| 8348 hsa-mir-455 | C7orf11  | 0.364500472 mirna_pc |
| 8349 hsa-mir-455 | ENO1     | 0.397317559 mirna_pc |
| 8350 hsa-mir-455 | LAMC2    | 0.487570927 mirna_pc |
| 8351 hsa-mir-455 | CENPH    | 0.405688703 mirna_pc |
| 8352 hsa-mir-455 | TCOF1    | 0.411136932 mirna_pc |
| 8353 hsa-mir-455 | TMSB10   | 0.387275592 mirna_pc |
| 8354 hsa-mir-455 | ULBP2    | 0.346709157 mirna_pc |
| 8355 hsa-mir-455 | EIF3B    | 0.313643335 mirna_pc |
| 8356 hsa-mir-455 | G3BP1    | 0.31405884 mirna_pc  |
| 8357 hsa-mir-455 | TOMM40   | 0.330745299 mirna_pc |
| 8358 hsa-mir-455 | F12      | 0.321977611 mirna_pc |
| 8359 hsa-mir-455 | NOL11    | 0.300478696 mirna_pc |
| 8360 hsa-mir-455 | TMEM189  | 0.337700668 mirna_pc |
| 8361 hsa-mir-455 | ARL6IP6  | 0.405806161 mirna_pc |
| 8362 hsa-mir-455 | HAUS8    | 0.306487133 mirna_pc |
| 8363 hsa-mir-455 | RFC4     | 0.454759098 mirna_pc |
| 8364 hsa-mir-455 | FBX05    | 0.306201822 mirna_pc |
| 8365 hsa-mir-455 | LAMB3    | 0.403316765 mirna_pc |
| 8366 hsa-mir-455 | EFNB1    | 0.419937097 mirna_pc |
| 8367 hsa-mir-455 | ACOT7    | 0.326565504 mirna_pc |
| 8368 hsa-mir-455 | H2AFZ    | 0.507900246 mirna_pc |
| 8369 hsa-mir-455 | NRM      | 0.422409353 mirna_pc |

|                  |          |                      |
|------------------|----------|----------------------|
| 8370 hsa-mir-455 | MAGOH    | 0.329522267 mirna_pc |
| 8371 hsa-mir-455 | NUP37    | 0.419212813 mirna_pc |
| 8372 hsa-mir-455 | LDHA     | 0.395248257 mirna_pc |
| 8373 hsa-mir-455 | CPSF3    | 0.322700097 mirna_pc |
| 8374 hsa-mir-455 | SNRPE    | 0.328645516 mirna_pc |
| 8375 hsa-mir-455 | PAQR4    | 0.392157516 mirna_pc |
| 8376 hsa-mir-455 | PPM1G    | 0.357226946 mirna_pc |
| 8377 hsa-mir-455 | SNRPD2   | 0.307576859 mirna_pc |
| 8378 hsa-mir-455 | PLAU     | 0.377415996 mirna_pc |
| 8379 hsa-mir-455 | MDFI     | 0.325040079 mirna_pc |
| 8380 hsa-mir-455 | NPM3     | 0.37139801 mirna_pc  |
| 8381 hsa-mir-455 | TFAP4    | 0.337419039 mirna_pc |
| 8382 hsa-mir-455 | PUS7     | 0.439338988 mirna_pc |
| 8383 hsa-mir-455 | CDH3     | 0.422225911 mirna_pc |
| 8384 hsa-mir-455 | NUTF2    | 0.36913911 mirna_pc  |
| 8385 hsa-mir-455 | RNPS1    | 0.354579736 mirna_pc |
| 8386 hsa-mir-455 | DAZAP1   | 0.416222629 mirna_pc |
| 8387 hsa-mir-455 | TXNDC9   | 0.351914618 mirna_pc |
| 8388 hsa-mir-455 | C10orf55 | 0.340542104 mirna_pc |
| 8389 hsa-mir-455 | PPIL5    | 0.38938662 mirna_pc  |
| 8390 hsa-mir-455 | TMEM201  | 0.336966129 mirna_pc |
| 8391 hsa-mir-455 | DCTPP1   | 0.326802306 mirna_pc |
| 8392 hsa-mir-455 | PSRC1    | 0.384626512 mirna_pc |
| 8393 hsa-mir-455 | ODF2     | 0.373123108 mirna_pc |
| 8394 hsa-mir-455 | DBF4B    | 0.322623174 mirna_pc |
| 8395 hsa-mir-455 | S100A3   | 0.336545972 mirna_pc |
| 8396 hsa-mir-455 | STIP1    | 0.375774108 mirna_pc |
| 8397 hsa-mir-455 | HIST1H1E | 0.443657464 mirna_pc |
| 8398 hsa-mir-455 | PSMG3    | 0.333558128 mirna_pc |
| 8399 hsa-mir-455 | THOP1    | 0.322766691 mirna_pc |
| 8400 hsa-mir-455 | SET      | 0.468634854 mirna_pc |
| 8401 hsa-mir-455 | NIP7     | 0.320186407 mirna_pc |
| 8402 hsa-mir-455 | C3orf26  | 0.390870342 mirna_pc |
| 8403 hsa-mir-455 | MRT04    | 0.36667135 mirna_pc  |
| 8404 hsa-mir-455 | BMP1     | 0.300857444 mirna_pc |
| 8405 hsa-mir-455 | NUP93    | 0.303346587 mirna_pc |
| 8406 hsa-mir-455 | POLE3    | 0.496947853 mirna_pc |
| 8407 hsa-mir-455 | GABPB1   | 0.375551944 mirna_pc |
| 8408 hsa-mir-455 | THOC6    | 0.367760165 mirna_pc |
| 8409 hsa-mir-455 | GMPS     | 0.360765921 mirna_pc |
| 8410 hsa-mir-455 | PPAT     | 0.314642567 mirna_pc |
| 8411 hsa-mir-455 | EIF5A    | 0.386243119 mirna_pc |
| 8412 hsa-mir-455 | GNB1L    | 0.316142408 mirna_pc |
| 8413 hsa-mir-455 | SMYD5    | 0.326974781 mirna_pc |
| 8414 hsa-mir-455 | PFN1     | 0.448373871 mirna_pc |
| 8415 hsa-mir-455 | BOP 1.00 | 0.337770806 mirna_pc |
| 8416 hsa-mir-455 | POLA2    | 0.389784614 mirna_pc |
| 8417 hsa-mir-455 | SFN      | 0.35949825 mirna_pc  |
| 8418 hsa-mir-455 | CCDC77   | 0.305160856 mirna_pc |
| 8419 hsa-mir-455 | BCL11B   | 0.352779704 mirna_pc |
| 8420 hsa-mir-455 | EXT1     | 0.317841305 mirna_pc |
| 8421 hsa-mir-455 | TEX10    | 0.422265999 mirna_pc |
| 8422 hsa-mir-455 | SKP2     | 0.37386264 mirna_pc  |
| 8423 hsa-mir-455 | TRAF3    | 0.327975723 mirna_pc |



|                  |              |                      |
|------------------|--------------|----------------------|
| 8424 hsa-mir-455 | UBE2I        | 0.312339421 mirna_pc |
| 8425 hsa-mir-455 | TIPIN        | 0.322878873 mirna_pc |
| 8426 hsa-mir-455 | CYP27B1      | 0.32005908 mirna_pc  |
| 8427 hsa-mir-455 | POLD2        | 0.366920157 mirna_pc |
| 8428 hsa-mir-455 | SMARCD1      | 0.390589286 mirna_pc |
| 8429 hsa-mir-455 | ATXN2L       | 0.401833219 mirna_pc |
| 8430 hsa-mir-455 | C4orf46      | 0.400829772 mirna_pc |
| 8431 hsa-mir-455 | AGTRAP       | 0.337083815 mirna_pc |
| 8432 hsa-mir-455 | ECE2         | 0.400606947 mirna_pc |
| 8433 hsa-mir-455 | GPN1         | 0.381447363 mirna_pc |
| 8434 hsa-mir-455 | VAV2         | 0.339142857 mirna_pc |
| 8435 hsa-mir-455 | FANCG        | 0.333846286 mirna_pc |
| 8436 hsa-mir-455 | MAZ          | 0.432691998 mirna_pc |
| 8437 hsa-mir-455 | RANGAP1      | 0.335945728 mirna_pc |
| 8438 hsa-mir-455 | SSRP1        | 0.439119391 mirna_pc |
| 8439 hsa-mir-455 | COL7A1       | 0.399001251 mirna_pc |
| 8440 hsa-mir-455 | POLR2D       | 0.336794196 mirna_pc |
| 8441 hsa-mir-455 | FTSJ2        | 0.301718983 mirna_pc |
| 8442 hsa-mir-455 | PA2G4        | 0.326466454 mirna_pc |
| 8443 hsa-mir-455 | SNRPD3       | 0.353254082 mirna_pc |
| 8444 hsa-mir-455 | KHDRBS1      | 0.363824532 mirna_pc |
| 8445 hsa-mir-455 | YEATS2       | 0.388860083 mirna_pc |
| 8446 hsa-mir-455 | MTL 5.00     | 0.352239087 mirna_pc |
| 8447 hsa-mir-455 | FSCN1        | 0.523240355 mirna_pc |
| 8448 hsa-mir-455 | RAD51L1      | 0.352371112 mirna_pc |
| 8449 hsa-mir-455 | PRPF4        | 0.364108858 mirna_pc |
| 8450 hsa-mir-455 | PYCRL        | 0.370840706 mirna_pc |
| 8451 hsa-mir-455 | HSP90AA1     | 0.300786225 mirna_pc |
| 8452 hsa-mir-455 | LOC100130776 | 0.352861362 mirna_pc |
| 8453 hsa-mir-455 | CCT7         | 0.423094414 mirna_pc |
| 8454 hsa-mir-455 | SNRNP40      | 0.383837209 mirna_pc |
| 8455 hsa-mir-455 | ITGB4        | 0.352255118 mirna_pc |
| 8456 hsa-mir-455 | MED30        | 0.324562002 mirna_pc |
| 8457 hsa-mir-455 | GINS3        | 0.400131931 mirna_pc |
| 8458 hsa-mir-455 | RPLPOP2      | 0.322805147 mirna_pc |
| 8459 hsa-mir-455 | NEDD1        | 0.499537173 mirna_pc |
| 8460 hsa-mir-455 | JUB          | 0.388247178 mirna_pc |
| 8461 hsa-mir-455 | YWHAG        | 0.367475731 mirna_pc |
| 8462 hsa-mir-455 | WRAP53       | 0.361547113 mirna_pc |
| 8463 hsa-mir-455 | PSMC2        | 0.374294684 mirna_pc |
| 8464 hsa-mir-455 | PTPN12       | 0.306650528 mirna_pc |
| 8465 hsa-mir-455 | CCDC86       | 0.501957899 mirna_pc |
| 8466 hsa-mir-455 | ZP3          | 0.326119547 mirna_pc |
| 8467 hsa-mir-455 | WDR76        | 0.354270411 mirna_pc |
| 8468 hsa-mir-455 | EXOSC2       | 0.451059625 mirna_pc |
| 8469 hsa-mir-455 | C11orf84     | 0.44065864 mirna_pc  |
| 8470 hsa-mir-455 | KRT17        | 0.38680578 mirna_pc  |
| 8471 hsa-mir-455 | TOP1MT       | 0.34187684 mirna_pc  |
| 8472 hsa-mir-455 | GAPDH        | 0.341333121 mirna_pc |
| 8473 hsa-mir-455 | HIST1H2BK    | 0.375070715 mirna_pc |
| 8474 hsa-mir-455 | NCBP2        | 0.302018414 mirna_pc |
| 8475 hsa-mir-455 | FBX0220S     | 0.300078381 mirna_pc |
| 8476 hsa-mir-455 | SLC3A2       | 0.465155554 mirna_pc |
| 8477 hsa-mir-455 | HNRNPD       | 0.362633952 mirna_pc |

|                  |          |                      |
|------------------|----------|----------------------|
| 8478 hsa-mir-455 | DDX31    | 0.322535963 mirna_pc |
| 8479 hsa-mir-455 | EIF5AL1  | 0.407048906 mirna_pc |
| 8480 hsa-mir-455 | SHOX2    | 0.32424476 mirna_pc  |
| 8481 hsa-mir-455 | PLOD1    | 0.310681089 mirna_pc |
| 8482 hsa-mir-455 | REXO4    | 0.467760755 mirna_pc |
| 8483 hsa-mir-455 | MEN1     | 0.474115038 mirna_pc |
| 8484 hsa-mir-455 | IKBIP    | 0.354350571 mirna_pc |
| 8485 hsa-mir-455 | C17orf49 | 0.354428411 mirna_pc |
| 8486 hsa-mir-455 | H1FX     | 0.373313791 mirna_pc |
| 8487 hsa-mir-455 | PN01     | 0.320517388 mirna_pc |
| 8488 hsa-mir-455 | CCT4     | 0.442670819 mirna_pc |
| 8489 hsa-mir-455 | SAC3D1   | 0.358014836 mirna_pc |
| 8490 hsa-mir-455 | RABEPK   | 0.461023598 mirna_pc |
| 8491 hsa-mir-455 | ELAVL1   | 0.347295373 mirna_pc |
| 8492 hsa-mir-455 | WDR18    | 0.347012092 mirna_pc |
| 8493 hsa-mir-455 | CENPP    | 0.50921818 mirna_pc  |
| 8494 hsa-mir-455 | MTHFD1   | 0.363646776 mirna_pc |
| 8495 hsa-mir-455 | MIF      | 0.372524095 mirna_pc |
| 8496 hsa-mir-455 | TFAP2A   | 0.413335154 mirna_pc |
| 8497 hsa-mir-455 | EIF4A1   | 0.426361665 mirna_pc |
| 8498 hsa-mir-455 | MMP12    | 0.423115924 mirna_pc |
| 8499 hsa-mir-455 | PSMC3IP  | 0.408689836 mirna_pc |
| 8500 hsa-mir-455 | PPP1R14B | 0.429855525 mirna_pc |
| 8501 hsa-mir-455 | PES 1.00 | 0.325338774 mirna_pc |
| 8502 hsa-mir-455 | PAK2     | 0.344132405 mirna_pc |
| 8503 hsa-mir-455 | PSMB7    | 0.472527715 mirna_pc |
| 8504 hsa-mir-455 | E2F4     | 0.388639289 mirna_pc |
| 8505 hsa-mir-455 | GJB3     | 0.404530948 mirna_pc |
| 8506 hsa-mir-455 | TRMT112  | 0.41700596 mirna_pc  |
| 8507 hsa-mir-455 | PKM2     | 0.355695616 mirna_pc |
| 8508 hsa-mir-455 | PLEK2    | 0.424978733 mirna_pc |
| 8509 hsa-mir-455 | PSMD2    | 0.424750054 mirna_pc |
| 8510 hsa-mir-455 | PGAM5    | 0.304674815 mirna_pc |
| 8511 hsa-mir-455 | PMAIP1   | 0.409989603 mirna_pc |
| 8512 hsa-mir-455 | YWHAE    | 0.420179257 mirna_pc |
| 8513 hsa-mir-455 | KDM1A    | 0.31814125 mirna_pc  |
| 8514 hsa-mir-455 | FOXD1    | 0.326254741 mirna_pc |
| 8515 hsa-mir-455 | ADCY3    | 0.341090687 mirna_pc |
| 8516 hsa-mir-455 | SLC25A22 | 0.372834881 mirna_pc |
| 8517 hsa-mir-455 | GLE1     | 0.321836839 mirna_pc |
| 8518 hsa-mir-455 | PGF      | 0.381274914 mirna_pc |
| 8519 hsa-mir-455 | WDR4     | 0.353404665 mirna_pc |
| 8520 hsa-mir-455 | NLN      | 0.359951816 mirna_pc |
| 8521 hsa-mir-455 | YARS2    | 0.353498527 mirna_pc |
| 8522 hsa-mir-455 | ADRB2    | 0.306370476 mirna_pc |
| 8523 hsa-mir-455 | TM4SF19  | 0.329717171 mirna_pc |
| 8524 hsa-mir-455 | GLRX3    | 0.385636159 mirna_pc |
| 8525 hsa-mir-455 | NCLN     | 0.329376521 mirna_pc |
| 8526 hsa-mir-455 | C14orf80 | 0.420180621 mirna_pc |
| 8527 hsa-mir-455 | AHSA1    | 0.338991135 mirna_pc |
| 8528 hsa-mir-455 | TGFA     | 0.367784062 mirna_pc |
| 8529 hsa-mir-455 | SKA2     | 0.3099345 mirna_pc   |
| 8530 hsa-mir-455 | ADORA2B  | 0.360062591 mirna_pc |
| 8531 hsa-mir-455 | CTSL2    | 0.336561349 mirna_pc |

|                  |          |                      |
|------------------|----------|----------------------|
| 8532 hsa-mir-455 | MT2A     | 0.315307672 mirna_pc |
| 8533 hsa-mir-455 | KHSRP    | 0.31910111 mirna_pc  |
| 8534 hsa-mir-455 | LRWD1    | 0.350679018 mirna_pc |
| 8535 hsa-mir-455 | HEATR2   | 0.335648168 mirna_pc |
| 8536 hsa-mir-455 | SH2D5    | 0.50869096 mirna_pc  |
| 8537 hsa-mir-455 | LSM 6.00 | 0.348205574 mirna_pc |
| 8538 hsa-mir-455 | PRAME    | 0.306257898 mirna_pc |
| 8539 hsa-mir-455 | FTSJ1    | 0.334663378 mirna_pc |
| 8540 hsa-mir-455 | WDR74    | 0.33594707 mirna_pc  |
| 8541 hsa-mir-455 | SUV39H1  | 0.329456786 mirna_pc |
| 8542 hsa-mir-455 | POLR2G   | 0.313927313 mirna_pc |
| 8543 hsa-mir-455 | PSMB5    | 0.326720381 mirna_pc |
| 8544 hsa-mir-455 | MFAP2    | 0.319222615 mirna_pc |
| 8545 hsa-mir-455 | NUP188   | 0.418332784 mirna_pc |
| 8546 hsa-mir-455 | TRA2B    | 0.322591763 mirna_pc |
| 8547 hsa-mir-455 | DPF1     | 0.325767212 mirna_pc |
| 8548 hsa-mir-455 | C15orf23 | 0.437485096 mirna_pc |
| 8549 hsa-mir-455 | KDELC1   | 0.317521259 mirna_pc |
| 8550 hsa-mir-455 | CIRH1A   | 0.339686783 mirna_pc |
| 8551 hsa-mir-455 | C3orf21  | 0.387742971 mirna_pc |
| 8552 hsa-mir-455 | SDCCAG3  | 0.338056285 mirna_pc |
| 8553 hsa-mir-455 | CD276    | 0.507538726 mirna_pc |
| 8554 hsa-mir-455 | IGF2BP2  | 0.478838868 mirna_pc |
| 8555 hsa-mir-455 | CTNNAL1  | 0.371171729 mirna_pc |
| 8556 hsa-mir-455 | C1QBP    | 0.308001175 mirna_pc |
| 8557 hsa-mir-455 | RRM1     | 0.327408495 mirna_pc |
| 8558 hsa-mir-455 | RAD23B   | 0.347546678 mirna_pc |
| 8559 hsa-mir-455 | MAP4K4   | 0.436246165 mirna_pc |
| 8560 hsa-mir-455 | C19orf47 | 0.300564113 mirna_pc |
| 8561 hsa-mir-455 | C4orf43  | 0.434136665 mirna_pc |
| 8562 hsa-mir-455 | XRCC3    | 0.545329013 mirna_pc |
| 8563 hsa-mir-455 | SRD5A1   | 0.3158567 mirna_pc   |
| 8564 hsa-mir-455 | YY1      | 0.31924433 mirna_pc  |
| 8565 hsa-mir-455 | GJB4     | 0.326226231 mirna_pc |
| 8566 hsa-mir-455 | CEP78    | 0.307872197 mirna_pc |
| 8567 hsa-mir-455 | TUBG1    | 0.426899751 mirna_pc |
| 8568 hsa-mir-455 | C16orf80 | 0.341713397 mirna_pc |
| 8569 hsa-mir-455 | MYBBP1A  | 0.338540244 mirna_pc |
| 8570 hsa-mir-455 | SFPQ     | 0.333572576 mirna_pc |
| 8571 hsa-mir-455 | XP06     | 0.354187217 mirna_pc |
| 8572 hsa-mir-455 | CD83     | 0.322566317 mirna_pc |
| 8573 hsa-mir-455 | SHMT2    | 0.312312801 mirna_pc |
| 8574 hsa-mir-455 | CISD2    | 0.36850917 mirna_pc  |
| 8575 hsa-mir-455 | GMNN     | 0.337440021 mirna_pc |
| 8576 hsa-mir-455 | EMG1     | 0.302415782 mirna_pc |
| 8577 hsa-mir-455 | IFI27L2  | 0.40680444 mirna_pc  |
| 8578 hsa-mir-455 | PA2G4P4  | 0.364406657 mirna_pc |
| 8579 hsa-mir-455 | WDR53    | 0.388795931 mirna_pc |
| 8580 hsa-mir-455 | ALOX12P2 | 0.365143376 mirna_pc |
| 8581 hsa-mir-455 | WDR54    | 0.351099093 mirna_pc |
| 8582 hsa-mir-455 | RPL26L1  | 0.359696945 mirna_pc |
| 8583 hsa-mir-455 | DUS4L    | 0.337887195 mirna_pc |
| 8584 hsa-mir-455 | DUT      | 0.38843585 mirna_pc  |
| 8585 hsa-mir-455 | CLSTN1   | 0.333420809 mirna_pc |

|                  |           |                      |
|------------------|-----------|----------------------|
| 8586 hsa-mir-455 | PCGF1     | 0.417392101 mirna_pc |
| 8587 hsa-mir-455 | HPRT1     | 0.304018249 mirna_pc |
| 8588 hsa-mir-455 | COX4NB    | 0.335103505 mirna_pc |
| 8589 hsa-mir-455 | MSH6      | 0.36204706 mirna_pc  |
| 8590 hsa-mir-455 | RPS6KA4   | 0.359788648 mirna_pc |
| 8591 hsa-mir-455 | TYSND1    | 0.370963943 mirna_pc |
| 8592 hsa-mir-455 | HOXD11    | 0.35667227 mirna_pc  |
| 8593 hsa-mir-455 | SRM       | 0.357409927 mirna_pc |
| 8594 hsa-mir-455 | PSMG1     | 0.321649775 mirna_pc |
| 8595 hsa-mir-455 | PPP1R8    | 0.309141145 mirna_pc |
| 8596 hsa-mir-455 | NPM1      | 0.319442017 mirna_pc |
| 8597 hsa-mir-455 | KREMEN2   | 0.394369928 mirna_pc |
| 8598 hsa-mir-455 | TRIP6     | 0.425447123 mirna_pc |
| 8599 hsa-mir-455 | TMEM194B  | 0.419800855 mirna_pc |
| 8600 hsa-mir-455 | UPP1      | 0.367132878 mirna_pc |
| 8601 hsa-mir-455 | RGS20     | 0.42836251 mirna_pc  |
| 8602 hsa-mir-455 | TPI1      | 0.381346525 mirna_pc |
| 8603 hsa-mir-455 | MEX3A     | 0.315083056 mirna_pc |
| 8604 hsa-mir-455 | MOGS      | 0.312646859 mirna_pc |
| 8605 hsa-mir-455 | RFC2      | 0.405053216 mirna_pc |
| 8606 hsa-mir-455 | FANCC     | 0.38844226 mirna_pc  |
| 8607 hsa-mir-455 | C16orf57  | 0.318441941 mirna_pc |
| 8608 hsa-mir-455 | WDR5      | 0.52933355 mirna_pc  |
| 8609 hsa-mir-455 | EXOSC4    | 0.356887169 mirna_pc |
| 8610 hsa-mir-455 | FAM58A    | 0.333944545 mirna_pc |
| 8611 hsa-mir-455 | MAD2L2    | 0.341642316 mirna_pc |
| 8612 hsa-mir-455 | CSNK1G2   | 0.388288248 mirna_pc |
| 8613 hsa-mir-455 | MAN1B1    | 0.317255278 mirna_pc |
| 8614 hsa-mir-455 | CBX1      | 0.43237305 mirna_pc  |
| 8615 hsa-mir-455 | COL27A1   | 0.649829835 mirna_pc |
| 8616 hsa-mir-455 | SNAPC1    | 0.360856084 mirna_pc |
| 8617 hsa-mir-455 | NOP10     | 0.336486028 mirna_pc |
| 8618 hsa-mir-455 | MRPL51    | 0.326235494 mirna_pc |
| 8619 hsa-mir-455 | FJX1      | 0.566730352 mirna_pc |
| 8620 hsa-mir-455 | ZDHHC12   | 0.354623778 mirna_pc |
| 8621 hsa-mir-455 | HIATL1    | 0.326356674 mirna_pc |
| 8622 hsa-mir-455 | GYLTL1B   | 0.310066568 mirna_pc |
| 8623 hsa-mir-455 | MED27     | 0.478834979 mirna_pc |
| 8624 hsa-mir-455 | C9orf30   | 0.533990378 mirna_pc |
| 8625 hsa-mir-455 | WDR66     | 0.368970186 mirna_pc |
| 8626 hsa-mir-455 | NOL10     | 0.310977523 mirna_pc |
| 8627 hsa-mir-455 | PXDN      | 0.314785182 mirna_pc |
| 8628 hsa-mir-455 | ODC1      | 0.456472771 mirna_pc |
| 8629 hsa-mir-455 | ITGA3     | 0.387378281 mirna_pc |
| 8630 hsa-mir-455 | LOC441089 | 0.451498964 mirna_pc |
| 8631 hsa-mir-455 | C9orf40   | 0.387811712 mirna_pc |
| 8632 hsa-mir-455 | HES4      | 0.312662956 mirna_pc |
| 8633 hsa-mir-455 | ADSL      | 0.361593971 mirna_pc |
| 8634 hsa-mir-455 | VRK1      | 0.362930878 mirna_pc |
| 8635 hsa-mir-455 | GPR176    | 0.311690993 mirna_pc |
| 8636 hsa-mir-455 | FPGS      | 0.346981884 mirna_pc |
| 8637 hsa-mir-455 | ANP32B    | 0.359851125 mirna_pc |
| 8638 hsa-mir-455 | EXOSC9    | 0.389232931 mirna_pc |
| 8639 hsa-mir-455 | KLC2      | 0.334067013 mirna_pc |

|                  |           |                      |
|------------------|-----------|----------------------|
| 8640 hsa-mir-455 | ZNF598    | 0.421634214 mirna_pc |
| 8641 hsa-mir-455 | FAM89A    | 0.318029543 mirna_pc |
| 8642 hsa-mir-455 | TELO2     | 0.360299607 mirna_pc |
| 8643 hsa-mir-455 | PRPS1     | 0.305939256 mirna_pc |
| 8644 hsa-mir-455 | ANO1      | 0.300170183 mirna_pc |
| 8645 hsa-mir-455 | TCTEX1D2  | 0.31427504 mirna_pc  |
| 8646 hsa-mir-455 | NETO2     | 0.302470342 mirna_pc |
| 8647 hsa-mir-455 | SPHK1     | 0.373009041 mirna_pc |
| 8648 hsa-mir-455 | BNIP3     | 0.309873392 mirna_pc |
| 8649 hsa-mir-455 | ITGA6     | 0.441933824 mirna_pc |
| 8650 hsa-mir-455 | RNF126    | 0.34283942 mirna_pc  |
| 8651 hsa-mir-455 | MLF 2.00  | 0.31035642 mirna_pc  |
| 8652 hsa-mir-455 | RAB7A     | 0.323503977 mirna_pc |
| 8653 hsa-mir-455 | SIGMAR1   | 0.330224151 mirna_pc |
| 8654 hsa-mir-455 | CSPG4     | 0.314090035 mirna_pc |
| 8655 hsa-mir-455 | FCF1      | 0.34850855 mirna_pc  |
| 8656 hsa-mir-455 | GSTO1     | 0.347598096 mirna_pc |
| 8657 hsa-mir-455 | RPL39L    | 0.486283832 mirna_pc |
| 8658 hsa-mir-455 | EIF2B2    | 0.316171405 mirna_pc |
| 8659 hsa-mir-455 | ACD       | 0.370991501 mirna_pc |
| 8660 hsa-mir-455 | RAD23A    | 0.328014065 mirna_pc |
| 8661 hsa-mir-455 | DNLZ      | 0.38035124 mirna_pc  |
| 8662 hsa-mir-455 | EPHB4     | 0.449509688 mirna_pc |
| 8663 hsa-mir-455 | LOC152217 | 0.35215775 mirna_pc  |
| 8664 hsa-mir-455 | TANC2     | 0.352774064 mirna_pc |
| 8665 hsa-mir-455 | ARNTL2    | 0.337645582 mirna_pc |
| 8666 hsa-mir-455 | NOB1      | 0.435320667 mirna_pc |
| 8667 hsa-mir-455 | PLXNA1    | 0.342261754 mirna_pc |
| 8668 hsa-mir-455 | ADK       | 0.311898322 mirna_pc |
| 8669 hsa-mir-455 | RPL12     | 0.331738211 mirna_pc |
| 8670 hsa-mir-455 | ZMYND19   | 0.453073642 mirna_pc |
| 8671 hsa-mir-455 | TAF12     | 0.362569632 mirna_pc |
| 8672 hsa-mir-455 | ARPC5L    | 0.380576075 mirna_pc |
| 8673 hsa-mir-455 | TLR2      | 0.326371484 mirna_pc |
| 8674 hsa-mir-455 | CDC27     | 0.336861708 mirna_pc |
| 8675 hsa-mir-455 | SURF2     | 0.428920181 mirna_pc |
| 8676 hsa-mir-455 | OSTC      | 0.355783932 mirna_pc |
| 8677 hsa-mir-455 | METTL11A  | 0.476110589 mirna_pc |
| 8678 hsa-mir-455 | LEPREL1   | 0.463103356 mirna_pc |
| 8679 hsa-mir-455 | DUSP7     | 0.322036228 mirna_pc |
| 8680 hsa-mir-455 | LTBR      | 0.30498429 mirna_pc  |
| 8681 hsa-mir-455 | PWP1      | 0.342645287 mirna_pc |
| 8682 hsa-mir-455 | MNAT1     | 0.364095543 mirna_pc |
| 8683 hsa-mir-455 | DRAP1     | 0.408801279 mirna_pc |
| 8684 hsa-mir-455 | SMARCB1   | 0.354917699 mirna_pc |
| 8685 hsa-mir-455 | B3GAT3    | 0.379483365 mirna_pc |
| 8686 hsa-mir-455 | MEX3D     | 0.395250742 mirna_pc |
| 8687 hsa-mir-455 | IL1RAP    | 0.374130838 mirna_pc |
| 8688 hsa-mir-455 | B4GALT2   | 0.4599521 mirna_pc   |
| 8689 hsa-mir-455 | RPA1      | 0.335580309 mirna_pc |
| 8690 hsa-mir-455 | FAM92A1   | 0.364788175 mirna_pc |
| 8691 hsa-mir-455 | TIMM10    | 0.328308264 mirna_pc |
| 8692 hsa-mir-455 | TGFB1     | 0.346040379 mirna_pc |
| 8693 hsa-mir-455 | IRF6      | 0.350109515 mirna_pc |

|                  |          |                      |
|------------------|----------|----------------------|
| 8694 hsa-mir-455 | ZDHC18   | 0.403037354 mirna_pc |
| 8695 hsa-mir-455 | ITPR1L1  | 0.312991694 mirna_pc |
| 8696 hsa-mir-455 | FOXK2    | 0.412530339 mirna_pc |
| 8697 hsa-mir-455 | ANAPC10  | 0.309296678 mirna_pc |
| 8698 hsa-mir-455 | TIGD5    | 0.363369109 mirna_pc |
| 8699 hsa-mir-455 | HEPHL1   | 0.376743953 mirna_pc |
| 8700 hsa-mir-455 | SLC7A5   | 0.362272896 mirna_pc |
| 8701 hsa-mir-455 | SLC16A1  | 0.421805007 mirna_pc |
| 8702 hsa-mir-455 | SLC25A17 | 0.346837843 mirna_pc |
| 8703 hsa-mir-455 | GSDMC    | 0.338505537 mirna_pc |
| 8704 hsa-mir-455 | MYO19    | 0.352138047 mirna_pc |
| 8705 hsa-mir-455 | NMT1     | 0.39472245 mirna_pc  |
| 8706 hsa-mir-455 | SLC2A9   | 0.337632496 mirna_pc |
| 8707 hsa-mir-455 | RPL35    | 0.369043259 mirna_pc |
| 8708 hsa-mir-455 | DVL3     | 0.304955049 mirna_pc |
| 8709 hsa-mir-455 | PSMC3    | 0.331748124 mirna_pc |
| 8710 hsa-mir-455 | BCL7A    | 0.304766935 mirna_pc |
| 8711 hsa-mir-455 | LGALS1   | 0.395088299 mirna_pc |
| 8712 hsa-mir-455 | MTX1     | 0.311478796 mirna_pc |
| 8713 hsa-mir-455 | DVL2     | 0.36681503 mirna_pc  |
| 8714 hsa-mir-455 | TRPA1    | 0.325827127 mirna_pc |
| 8715 hsa-mir-455 | STARD5   | 0.382597589 mirna_pc |
| 8716 hsa-mir-455 | TTC4     | 0.440489739 mirna_pc |
| 8717 hsa-mir-455 | KIAA0922 | 0.320407721 mirna_pc |
| 8718 hsa-mir-455 | CCM2     | 0.338214352 mirna_pc |
| 8719 hsa-mir-455 | PANX1    | 0.435243479 mirna_pc |
| 8720 hsa-mir-455 | MRPL21   | 0.3266467 mirna_pc   |
| 8721 hsa-mir-455 | UBE2Z    | 0.337285649 mirna_pc |
| 8722 hsa-mir-455 | GJB5     | 0.309117615 mirna_pc |
| 8723 hsa-mir-455 | PPP1R14C | 0.406120145 mirna_pc |
| 8724 hsa-mir-455 | CYP26B1  | 0.404943892 mirna_pc |
| 8725 hsa-mir-455 | KCNQ5    | 0.391752872 mirna_pc |
| 8726 hsa-mir-455 | PSPH     | 0.317448175 mirna_pc |
| 8727 hsa-mir-455 | EIF2S1   | 0.442902426 mirna_pc |
| 8728 hsa-mir-455 | S100A2   | 0.410213183 mirna_pc |
| 8729 hsa-mir-455 | TTL      | 0.320941 mirna_pc    |
| 8730 hsa-mir-455 | C9orf69  | 0.429750164 mirna_pc |
| 8731 hsa-mir-455 | CNTROB   | 0.335908426 mirna_pc |
| 8732 hsa-mir-455 | IPPK     | 0.384198001 mirna_pc |
| 8733 hsa-mir-455 | C5orf13  | 0.343923159 mirna_pc |
| 8734 hsa-mir-455 | SEMA4F   | 0.322596184 mirna_pc |
| 8735 hsa-mir-455 | LPAR3    | 0.367327594 mirna_pc |
| 8736 hsa-mir-455 | ZBED2    | 0.332908485 mirna_pc |
| 8737 hsa-mir-455 | PDPN     | 0.440853754 mirna_pc |
| 8738 hsa-mir-455 | TUSC1    | 0.336719855 mirna_pc |
| 8739 hsa-mir-455 | HRAS     | 0.352603394 mirna_pc |
| 8740 hsa-mir-455 | RMI1     | 0.307395798 mirna_pc |
| 8741 hsa-mir-455 | MRPS2    | 0.392294927 mirna_pc |
| 8742 hsa-mir-455 | MTA1     | 0.407863458 mirna_pc |
| 8743 hsa-mir-455 | FMNL2    | 0.440189676 mirna_pc |
| 8744 hsa-mir-455 | HTRA2    | 0.336563141 mirna_pc |
| 8745 hsa-mir-455 | RAB38    | 0.377821758 mirna_pc |
| 8746 hsa-mir-455 | PFN2     | 0.304405543 mirna_pc |
| 8747 hsa-mir-455 | ATP6V1E2 | 0.34347094 mirna_pc  |

|                  |          |                      |
|------------------|----------|----------------------|
| 8748 hsa-mir-455 | GNAI1    | 0.419707319 mirna_pc |
| 8749 hsa-mir-455 | SSSCA1   | 0.340112355 mirna_pc |
| 8750 hsa-mir-455 | B4GALNT1 | 0.403026603 mirna_pc |
| 8751 hsa-mir-455 | SENP3    | 0.376924446 mirna_pc |
| 8752 hsa-mir-455 | PSMD5    | 0.321199816 mirna_pc |
| 8753 hsa-mir-455 | Clorf74  | 0.312718055 mirna_pc |
| 8754 hsa-mir-455 | IL12RB2  | 0.334243167 mirna_pc |
| 8755 hsa-mir-455 | GPC1     | 0.370790991 mirna_pc |
| 8756 hsa-mir-455 | C9orf114 | 0.39290029 mirna_pc  |
| 8757 hsa-mir-455 | PTMS     | 0.355012999 mirna_pc |
| 8758 hsa-mir-455 | SOCS1    | 0.326194699 mirna_pc |
| 8759 hsa-mir-455 | STON2    | 0.420531361 mirna_pc |
| 8760 hsa-mir-455 | LDLRAD3  | 0.426011357 mirna_pc |
| 8761 hsa-mir-455 | COPS6    | 0.315286955 mirna_pc |
| 8762 hsa-mir-455 | MRPS34   | 0.331058918 mirna_pc |
| 8763 hsa-mir-455 | TRAF7    | 0.339701677 mirna_pc |
| 8764 hsa-mir-455 | DARS     | 0.419112204 mirna_pc |
| 8765 hsa-mir-455 | AAAS     | 0.302399593 mirna_pc |
| 8766 hsa-mir-455 | MARK3    | 0.377961558 mirna_pc |
| 8767 hsa-mir-455 | CHST14   | 0.334130893 mirna_pc |
| 8768 hsa-mir-455 | COL17A1  | 0.45808531 mirna_pc  |
| 8769 hsa-mir-455 | INPP5E   | 0.384341276 mirna_pc |
| 8770 hsa-mir-455 | C9orf6   | 0.302962292 mirna_pc |
| 8771 hsa-mir-455 | PYGL     | 0.353546096 mirna_pc |
| 8772 hsa-mir-455 | KRT5     | 0.388748062 mirna_pc |
| 8773 hsa-mir-455 | MRPL30   | 0.345381655 mirna_pc |
| 8774 hsa-mir-455 | TMEFF1   | 0.453578429 mirna_pc |
| 8775 hsa-mir-455 | P4HA1    | 0.301527106 mirna_pc |
| 8776 hsa-mir-455 | FGFBP1   | 0.32089991 mirna_pc  |
| 8777 hsa-mir-455 | IL20RB   | 0.393399353 mirna_pc |
| 8778 hsa-mir-455 | GOLGA7B  | 0.394550218 mirna_pc |
| 8779 hsa-mir-455 | ZNF385A  | 0.311559246 mirna_pc |
| 8780 hsa-mir-455 | ITGB1BP1 | 0.361688852 mirna_pc |
| 8781 hsa-mir-455 | UBE2E3   | 0.376196635 mirna_pc |
| 8782 hsa-mir-455 | ENDOG    | 0.343710143 mirna_pc |
| 8783 hsa-mir-455 | INO80B   | 0.333042534 mirna_pc |
| 8784 hsa-mir-455 | LY6K     | 0.338949215 mirna_pc |
| 8785 hsa-mir-455 | MBD3     | 0.379479577 mirna_pc |
| 8786 hsa-mir-455 | RXRA     | 0.303762886 mirna_pc |
| 8787 hsa-mir-455 | VSNL1    | 0.321884972 mirna_pc |
| 8788 hsa-mir-455 | HSF1     | 0.349162195 mirna_pc |
| 8789 hsa-mir-455 | AVEN     | 0.325918755 mirna_pc |
| 8790 hsa-mir-455 | PLS3     | 0.341996003 mirna_pc |
| 8791 hsa-mir-455 | FADS2    | 0.317152404 mirna_pc |
| 8792 hsa-mir-455 | CCDC85B  | 0.327409716 mirna_pc |
| 8793 hsa-mir-455 | HOMER3   | 0.372679125 mirna_pc |
| 8794 hsa-mir-455 | SERPINE1 | 0.365177655 mirna_pc |
| 8795 hsa-mir-455 | PHF19    | 0.352361708 mirna_pc |
| 8796 hsa-mir-455 | CELSR1   | 0.328204123 mirna_pc |
| 8797 hsa-mir-455 | MRPL28   | 0.351438057 mirna_pc |
| 8798 hsa-mir-455 | HOXA7    | 0.305455935 mirna_pc |
| 8799 hsa-mir-455 | BTBD6    | 0.367570025 mirna_pc |
| 8800 hsa-mir-455 | YWHAQ    | 0.429546255 mirna_pc |
| 8801 hsa-mir-455 | MSN      | 0.423878856 mirna_pc |

|      |             |           |             |          |
|------|-------------|-----------|-------------|----------|
| 8802 | hsa-mir-455 | RPL35A    | 0.30897535  | mirna_pc |
| 8803 | hsa-mir-455 | PTRH1     | 0.316857923 | mirna_pc |
| 8804 | hsa-mir-455 | C16orf74  | 0.373945732 | mirna_pc |
| 8805 | hsa-mir-455 | ZNF771    | 0.32845755  | mirna_pc |
| 8806 | hsa-mir-455 | PLEC      | 0.333618466 | mirna_pc |
| 8807 | hsa-mir-455 | COBRA1    | 0.330876551 | mirna_pc |
| 8808 | hsa-mir-455 | SERPINE2  | 0.359011055 | mirna_pc |
| 8809 | hsa-mir-455 | FN3KRP    | 0.304927545 | mirna_pc |
| 8810 | hsa-mir-455 | CNTLN     | 0.315399682 | mirna_pc |
| 8811 | hsa-mir-455 | EIF4G1    | 0.302712393 | mirna_pc |
| 8812 | hsa-mir-455 | BICD2     | 0.354326563 | mirna_pc |
| 8813 | hsa-mir-455 | PPP2R3B   | 0.340800882 | mirna_pc |
| 8814 | hsa-mir-455 | DSE       | 0.320434954 | mirna_pc |
| 8815 | hsa-mir-455 | KRT14     | 0.471782038 | mirna_pc |
| 8816 | hsa-mir-455 | C12orf45  | 0.347355518 | mirna_pc |
| 8817 | hsa-mir-455 | PSMB6     | 0.43132768  | mirna_pc |
| 8818 | hsa-mir-455 | TMEM17    | 0.366986072 | mirna_pc |
| 8819 | hsa-mir-455 | UBAC1     | 0.305441844 | mirna_pc |
| 8820 | hsa-mir-455 | MMP17     | 0.311811045 | mirna_pc |
| 8821 | hsa-mir-455 | TMEM132A  | 0.400776611 | mirna_pc |
| 8822 | hsa-mir-455 | PGAM1     | 0.333288567 | mirna_pc |
| 8823 | hsa-mir-455 | GNAI2     | 0.416095788 | mirna_pc |
| 8824 | hsa-mir-455 | YKT6      | 0.302973404 | mirna_pc |
| 8825 | hsa-mir-455 | TP63      | 0.336817834 | mirna_pc |
| 8826 | hsa-mir-455 | TMEM11    | 0.301100703 | mirna_pc |
| 8827 | hsa-mir-455 | USP5      | 0.308317382 | mirna_pc |
| 8828 | hsa-mir-455 | AGBL5     | 0.30454802  | mirna_pc |
| 8829 | hsa-mir-455 | CCRN4L    | 0.357049586 | mirna_pc |
| 8830 | hsa-mir-455 | C17orf89  | 0.31049948  | mirna_pc |
| 8831 | hsa-mir-455 | PHB2      | 0.313357838 | mirna_pc |
| 8832 | hsa-mir-455 | MAPKBP1   | 0.342843503 | mirna_pc |
| 8833 | hsa-mir-455 | SNAI2     | 0.525807973 | mirna_pc |
| 8834 | hsa-mir-455 | SLC31A2   | 0.40950178  | mirna_pc |
| 8835 | hsa-mir-455 | VAC14     | 0.34873364  | mirna_pc |
| 8836 | hsa-mir-455 | SSNA1     | 0.309798458 | mirna_pc |
| 8837 | hsa-mir-455 | APLF      | 0.330103252 | mirna_pc |
| 8838 | hsa-mir-455 | PJA1      | 0.337023639 | mirna_pc |
| 8839 | hsa-mir-455 | CDK9      | 0.333951056 | mirna_pc |
| 8840 | hsa-mir-455 | BAIAP2    | 0.320130032 | mirna_pc |
| 8841 | hsa-mir-455 | SOX15     | 0.412910057 | mirna_pc |
| 8842 | hsa-mir-455 | EIF2B3    | 0.389687933 | mirna_pc |
| 8843 | hsa-mir-455 | BNC1      | 0.449733116 | mirna_pc |
| 8844 | hsa-mir-455 | NME4      | 0.315823852 | mirna_pc |
| 8845 | hsa-mir-455 | LYRM4     | 0.341064287 | mirna_pc |
| 8846 | hsa-mir-455 | NDRG1     | 0.330973668 | mirna_pc |
| 8847 | hsa-mir-455 | CHST11    | 0.381833638 | mirna_pc |
| 8848 | hsa-mir-455 | FBXO17    | 0.303623067 | mirna_pc |
| 8849 | hsa-mir-455 | DOLK      | 0.336629638 | mirna_pc |
| 8850 | hsa-mir-455 | IRX4      | 0.443122912 | mirna_pc |
| 8851 | hsa-mir-455 | SLC25A11  | 0.309595323 | mirna_pc |
| 8852 | hsa-mir-455 | C14orf149 | 0.367178337 | mirna_pc |
| 8853 | hsa-mir-455 | MARVELD1  | 0.323566042 | mirna_pc |
| 8854 | hsa-mir-455 | PIN1      | 0.313525173 | mirna_pc |
| 8855 | hsa-mir-455 | PTCD2     | 0.325376411 | mirna_pc |



|                  |           |                      |
|------------------|-----------|----------------------|
| 8856 hsa-mir-455 | C7orf10   | 0.413289525 mirna_pc |
| 8857 hsa-mir-455 | LMAN2L    | 0.402685022 mirna_pc |
| 8858 hsa-mir-455 | TCF7L1    | 0.331415519 mirna_pc |
| 8859 hsa-mir-455 | C17orf81  | 0.306454354 mirna_pc |
| 8860 hsa-mir-455 | PTHLH     | 0.371609987 mirna_pc |
| 8861 hsa-mir-455 | CYP27C1   | 0.379014262 mirna_pc |
| 8862 hsa-mir-455 | PCDHGC3   | 0.324523419 mirna_pc |
| 8863 hsa-mir-455 | FADS1     | 0.316971042 mirna_pc |
| 8864 hsa-mir-455 | PIK3CD    | 0.343029497 mirna_pc |
| 8865 hsa-mir-455 | CHST15    | 0.313577372 mirna_pc |
| 8866 hsa-mir-455 | DDX19A    | 0.384361009 mirna_pc |
| 8867 hsa-mir-455 | EIF4H     | 0.302888424 mirna_pc |
| 8868 hsa-mir-455 | MED31     | 0.333616722 mirna_pc |
| 8869 hsa-mir-455 | DDX50     | 0.310046398 mirna_pc |
| 8870 hsa-mir-455 | RTN4RL1   | 0.322114664 mirna_pc |
| 8871 hsa-mir-455 | PLSCR3    | 0.445887325 mirna_pc |
| 8872 hsa-mir-455 | MLLT11    | 0.416162941 mirna_pc |
| 8873 hsa-mir-455 | RAP1GDS1  | 0.405331878 mirna_pc |
| 8874 hsa-mir-455 | TRAPPC1   | 0.345333265 mirna_pc |
| 8875 hsa-mir-455 | C14orf179 | 0.304409395 mirna_pc |
| 8876 hsa-mir-455 | TBCA      | 0.333189089 mirna_pc |
| 8877 hsa-mir-455 | AP1M1     | 0.322104608 mirna_pc |
| 8878 hsa-mir-455 | NXN       | 0.425519896 mirna_pc |
| 8879 hsa-mir-455 | LRRC8A    | 0.412013032 mirna_pc |
| 8880 hsa-mir-455 | SRPK2     | 0.468143789 mirna_pc |
| 8881 hsa-mir-455 | PGAM4     | 0.300091613 mirna_pc |
| 8882 hsa-mir-455 | NRG1      | 0.457079011 mirna_pc |
| 8883 hsa-mir-455 | BPGM      | 0.329499588 mirna_pc |
| 8884 hsa-mir-455 | GALNT14   | 0.492211044 mirna_pc |
| 8885 hsa-mir-455 | XRCC1     | 0.393920599 mirna_pc |
| 8886 hsa-mir-455 | LRRC8C    | 0.317543012 mirna_pc |
| 8887 hsa-mir-455 | GALNTL4   | 0.475492493 mirna_pc |
| 8888 hsa-mir-455 | AFAP1L1   | 0.345627171 mirna_pc |
| 8889 hsa-mir-455 | FLRT2     | 0.411029502 mirna_pc |
| 8890 hsa-mir-455 | CXCL14    | 0.378370702 mirna_pc |
| 8891 hsa-mir-455 | ERLIN1    | 0.30575399 mirna_pc  |
| 8892 hsa-mir-455 | CLPB      | 0.309791454 mirna_pc |
| 8893 hsa-mir-455 | ZDHHC8    | 0.322448222 mirna_pc |
| 8894 hsa-mir-455 | FGD1      | 0.31614032 mirna_pc  |
| 8895 hsa-mir-455 | CCBL1     | 0.331141944 mirna_pc |
| 8896 hsa-mir-455 | PRNP      | 0.386322114 mirna_pc |
| 8897 hsa-mir-455 | PCYT1A    | 0.351857974 mirna_pc |
| 8898 hsa-mir-455 | SEN2      | 0.305531133 mirna_pc |
| 8899 hsa-mir-455 | KIRREL    | 0.427848223 mirna_pc |
| 8900 hsa-mir-455 | UHRF2     | 0.316892546 mirna_pc |
| 8901 hsa-mir-455 | BTBD2     | 0.383127994 mirna_pc |
| 8902 hsa-mir-455 | PACSIN3   | 0.304327852 mirna_pc |
| 8903 hsa-mir-455 | TMEM200B  | 0.376947121 mirna_pc |
| 8904 hsa-mir-455 | FAM169A   | 0.348488991 mirna_pc |
| 8905 hsa-mir-455 | PPP2R4    | 0.352998633 mirna_pc |
| 8906 hsa-mir-455 | C16orf42  | 0.360252451 mirna_pc |
| 8907 hsa-mir-455 | GPR68     | 0.376734738 mirna_pc |
| 8908 hsa-mir-455 | EIF2AK4   | 0.300950441 mirna_pc |
| 8909 hsa-mir-455 | ODZ3      | 0.496970453 mirna_pc |

|                  |           |                      |
|------------------|-----------|----------------------|
| 8910 hsa-mir-455 | TMEM203   | 0.310655118 mirna_pc |
| 8911 hsa-mir-455 | RASL11B   | 0.420278855 mirna_pc |
| 8912 hsa-mir-455 | PDLIM4    | 0.300821186 mirna_pc |
| 8913 hsa-mir-455 | POLE4     | 0.334947774 mirna_pc |
| 8914 hsa-mir-455 | PCDHGC5   | 0.361599494 mirna_pc |
| 8915 hsa-mir-455 | DKK 3.00  | 0.319213342 mirna_pc |
| 8916 hsa-mir-455 | IQCG      | 0.327001646 mirna_pc |
| 8917 hsa-mir-455 | CCDC111   | 0.314566893 mirna_pc |
| 8918 hsa-mir-455 | TXNDC17   | 0.348241548 mirna_pc |
| 8919 hsa-mir-455 | FST       | 0.331212014 mirna_pc |
| 8920 hsa-mir-455 | NAP1L4    | 0.374161831 mirna_pc |
| 8921 hsa-mir-455 | LOC645166 | 0.323663713 mirna_pc |
| 8922 hsa-mir-455 | NLRP1     | 0.320329096 mirna_pc |
| 8923 hsa-mir-455 | ODZ2      | 0.423888382 mirna_pc |
| 8924 hsa-mir-455 | UBE2L3    | 0.377557121 mirna_pc |
| 8925 hsa-mir-455 | ARSJ      | 0.335226169 mirna_pc |
| 8926 hsa-mir-455 | PSMD9     | 0.323994531 mirna_pc |
| 8927 hsa-mir-455 | MYH10     | 0.427587306 mirna_pc |
| 8928 hsa-mir-455 | FAM126A   | 0.312134828 mirna_pc |
| 8929 hsa-mir-455 | MOBK12A   | 0.433882542 mirna_pc |
| 8930 hsa-mir-455 | PC        | 0.366465763 mirna_pc |
| 8931 hsa-mir-455 | DULLARD   | 0.357132588 mirna_pc |
| 8932 hsa-mir-455 | Clorf201  | 0.348594399 mirna_pc |
| 8933 hsa-mir-455 | RIC8A     | 0.312996261 mirna_pc |
| 8934 hsa-mir-455 | CINP      | 0.35702803 mirna_pc  |
| 8935 hsa-mir-455 | STK17A    | 0.348761332 mirna_pc |
| 8936 hsa-mir-455 | IKBKAP    | 0.355387536 mirna_pc |
| 8937 hsa-mir-455 | ETV5      | 0.30957457 mirna_pc  |
| 8938 hsa-mir-455 | NFE2L1    | 0.346952908 mirna_pc |
| 8939 hsa-mir-455 | CA12      | 0.346260645 mirna_pc |
| 8940 hsa-mir-455 | EXOSC6    | 0.455387496 mirna_pc |
| 8941 hsa-mir-455 | VEGFC     | 0.321588678 mirna_pc |
| 8942 hsa-mir-455 | THAP11    | 0.343256223 mirna_pc |
| 8943 hsa-mir-455 | LRP12     | 0.330722791 mirna_pc |
| 8944 hsa-mir-455 | POLR2E    | 0.307648245 mirna_pc |
| 8945 hsa-mir-455 | FZD1      | 0.313891684 mirna_pc |
| 8946 hsa-mir-455 | DFNA5     | 0.409580362 mirna_pc |
| 8947 hsa-mir-455 | TWIST2    | 0.310469643 mirna_pc |
| 8948 hsa-mir-455 | GEMIN4    | 0.337949935 mirna_pc |
| 8949 hsa-mir-455 | ANXA5     | 0.305850453 mirna_pc |
| 8950 hsa-mir-455 | RPL26     | 0.303433626 mirna_pc |
| 8951 hsa-mir-455 | H2AFY2    | 0.450335528 mirna_pc |
| 8952 hsa-mir-455 | UCHL1     | 0.339409337 mirna_pc |
| 8953 hsa-mir-455 | MRPS23    | 0.361671694 mirna_pc |
| 8954 hsa-mir-455 | P4HA2     | 0.316970064 mirna_pc |
| 8955 hsa-mir-455 | SCHIP1    | 0.383440152 mirna_pc |
| 8956 hsa-mir-455 | CIZ1      | 0.327281064 mirna_pc |
| 8957 hsa-mir-455 | C21orf70  | 0.321555768 mirna_pc |
| 8958 hsa-mir-455 | GJC1      | 0.327065743 mirna_pc |
| 8959 hsa-mir-455 | DPM2      | 0.333878361 mirna_pc |
| 8960 hsa-mir-455 | ZC3HC1    | 0.300964764 mirna_pc |
| 8961 hsa-mir-455 | COPS3     | 0.339519679 mirna_pc |
| 8962 hsa-mir-455 | CKAP4     | 0.437602923 mirna_pc |
| 8963 hsa-mir-455 | FEZ1      | 0.442639657 mirna_pc |

|                    |           |                      |
|--------------------|-----------|----------------------|
| 8964 hsa-mir-455   | HCG4      | 0.334036241 mirna_pc |
| 8965 hsa-mir-455   | RRAS2     | 0.368844849 mirna_pc |
| 8966 hsa-mir-455   | TIMM22    | 0.396414812 mirna_pc |
| 8967 hsa-mir-455   | PPIF      | 0.418458778 mirna_pc |
| 8968 hsa-mir-103-2 | MKI67     | 0.322377601 mirna_pc |
| 8969 hsa-mir-103-2 | TPX2      | 0.40664534 mirna_pc  |
| 8970 hsa-mir-103-2 | KIF4B     | 0.352360176 mirna_pc |
| 8971 hsa-mir-103-2 | CENPF     | 0.366268074 mirna_pc |
| 8972 hsa-mir-103-2 | KIF11     | 0.381888101 mirna_pc |
| 8973 hsa-mir-103-2 | FOXO1     | 0.316237493 mirna_pc |
| 8974 hsa-mir-103-2 | RRM2      | 0.341365175 mirna_pc |
| 8975 hsa-mir-103-2 | CDK1      | 0.372266431 mirna_pc |
| 8976 hsa-mir-103-2 | CDC25C    | 0.330094432 mirna_pc |
| 8977 hsa-mir-103-2 | MYBL2     | 0.313240572 mirna_pc |
| 8978 hsa-mir-103-2 | PCNA      | 0.380004983 mirna_pc |
| 8979 hsa-mir-103-2 | UBE2C     | 0.391147712 mirna_pc |
| 8980 hsa-mir-103-2 | BUB1      | 0.362695485 mirna_pc |
| 8981 hsa-mir-103-2 | NUSAP1    | 0.341381059 mirna_pc |
| 8982 hsa-mir-103-2 | MCM4      | 0.365195503 mirna_pc |
| 8983 hsa-mir-103-2 | BUB1B     | 0.370492652 mirna_pc |
| 8984 hsa-mir-103-2 | HDGF      | 0.387549993 mirna_pc |
| 8985 hsa-mir-103-2 | KIF18B    | 0.337923195 mirna_pc |
| 8986 hsa-mir-103-2 | ASPM      | 0.370313525 mirna_pc |
| 8987 hsa-mir-103-2 | KIF2C     | 0.328112785 mirna_pc |
| 8988 hsa-mir-103-2 | FANCA     | 0.374471843 mirna_pc |
| 8989 hsa-mir-103-2 | NCAPG     | 0.402843105 mirna_pc |
| 8990 hsa-mir-103-2 | CLSPN     | 0.346078201 mirna_pc |
| 8991 hsa-mir-103-2 | SGOL1     | 0.315420602 mirna_pc |
| 8992 hsa-mir-103-2 | ARHGAP11A | 0.312237794 mirna_pc |
| 8993 hsa-mir-103-2 | CDC25B    | 0.389084101 mirna_pc |
| 8994 hsa-mir-103-2 | CBX3      | 0.335059942 mirna_pc |
| 8995 hsa-mir-103-2 | SPC25     | 0.345690297 mirna_pc |
| 8996 hsa-mir-103-2 | MELK      | 0.402992276 mirna_pc |
| 8997 hsa-mir-103-2 | FANCI     | 0.350335845 mirna_pc |
| 8998 hsa-mir-103-2 | NEK2      | 0.366478393 mirna_pc |
| 8999 hsa-mir-103-2 | NCAPH     | 0.366818442 mirna_pc |
| 9000 hsa-mir-103-2 | GTSE1     | 0.348092683 mirna_pc |
| 9001 hsa-mir-103-2 | KIF23     | 0.308855339 mirna_pc |
| 9002 hsa-mir-103-2 | TIMELESS  | 0.408785133 mirna_pc |
| 9003 hsa-mir-103-2 | LMNB1     | 0.340404829 mirna_pc |
| 9004 hsa-mir-103-2 | TROAP     | 0.340806148 mirna_pc |
| 9005 hsa-mir-103-2 | CCNB1     | 0.300597272 mirna_pc |
| 9006 hsa-mir-103-2 | CDCA5     | 0.313270499 mirna_pc |
| 9007 hsa-mir-103-2 | XP01      | 0.313999337 mirna_pc |
| 9008 hsa-mir-103-2 | EXO1      | 0.320263182 mirna_pc |
| 9009 hsa-mir-103-2 | CDCA2     | 0.328983355 mirna_pc |
| 9010 hsa-mir-103-2 | DKC1      | 0.360533311 mirna_pc |
| 9011 hsa-mir-103-2 | KIF4A     | 0.376682768 mirna_pc |
| 9012 hsa-mir-103-2 | ORC1L     | 0.37775707 mirna_pc  |
| 9013 hsa-mir-103-2 | SNRNPB    | 0.409866709 mirna_pc |
| 9014 hsa-mir-103-2 | KNTC1     | 0.388853599 mirna_pc |
| 9015 hsa-mir-103-2 | CCNF      | 0.329649607 mirna_pc |
| 9016 hsa-mir-103-2 | PTBP1     | 0.303922555 mirna_pc |
| 9017 hsa-mir-103-2 | NUF2      | 0.461252585 mirna_pc |

|      |               |           |             |          |
|------|---------------|-----------|-------------|----------|
| 9018 | hsa-mir-103-2 | PLK4      | 0.348410716 | mirna_pc |
| 9019 | hsa-mir-103-2 | FANCB     | 0.386503307 | mirna_pc |
| 9020 | hsa-mir-103-2 | KIF18A    | 0.339485148 | mirna_pc |
| 9021 | hsa-mir-103-2 | DEPDC1    | 0.319019731 | mirna_pc |
| 9022 | hsa-mir-103-2 | KIF14     | 0.34979961  | mirna_pc |
| 9023 | hsa-mir-103-2 | HJURP     | 0.377951454 | mirna_pc |
| 9024 | hsa-mir-103-2 | SKA1      | 0.38633935  | mirna_pc |
| 9025 | hsa-mir-103-2 | BLM       | 0.380345001 | mirna_pc |
| 9026 | hsa-mir-103-2 | CKAP2L    | 0.305169979 | mirna_pc |
| 9027 | hsa-mir-103-2 | DNMT1     | 0.392786586 | mirna_pc |
| 9028 | hsa-mir-103-2 | PAICS     | 0.36264134  | mirna_pc |
| 9029 | hsa-mir-103-2 | CCDC150   | 0.329499605 | mirna_pc |
| 9030 | hsa-mir-103-2 | LIG1      | 0.323132709 | mirna_pc |
| 9031 | hsa-mir-103-2 | DTL       | 0.401408649 | mirna_pc |
| 9032 | hsa-mir-103-2 | RECQL4    | 0.417708021 | mirna_pc |
| 9033 | hsa-mir-103-2 | AURKA     | 0.370674586 | mirna_pc |
| 9034 | hsa-mir-103-2 | CENPK     | 0.406461835 | mirna_pc |
| 9035 | hsa-mir-103-2 | AURKB     | 0.344105926 | mirna_pc |
| 9036 | hsa-mir-103-2 | MCM10     | 0.38216866  | mirna_pc |
| 9037 | hsa-mir-103-2 | SGOL2     | 0.355603055 | mirna_pc |
| 9038 | hsa-mir-103-2 | CHEK2     | 0.318062301 | mirna_pc |
| 9039 | hsa-mir-103-2 | CENPE     | 0.342705351 | mirna_pc |
| 9040 | hsa-mir-103-2 | KIF15     | 0.363126665 | mirna_pc |
| 9041 | hsa-mir-103-2 | CDCA3     | 0.342150408 | mirna_pc |
| 9042 | hsa-mir-103-2 | C1orf112  | 0.466891207 | mirna_pc |
| 9043 | hsa-mir-103-2 | GINS1     | 0.503301945 | mirna_pc |
| 9044 | hsa-mir-103-2 | ORC6L     | 0.373598133 | mirna_pc |
| 9045 | hsa-mir-103-2 | C16orf59  | 0.302283476 | mirna_pc |
| 9046 | hsa-mir-103-2 | CDKN3     | 0.303216395 | mirna_pc |
| 9047 | hsa-mir-103-2 | RAE1      | 0.300275182 | mirna_pc |
| 9048 | hsa-mir-103-2 | EZH2      | 0.310415399 | mirna_pc |
| 9049 | hsa-mir-103-2 | POLD1     | 0.307535665 | mirna_pc |
| 9050 | hsa-mir-103-2 | C12orf48  | 0.416987141 | mirna_pc |
| 9051 | hsa-mir-103-2 | HNRNPL    | 0.32556688  | mirna_pc |
| 9052 | hsa-mir-103-2 | TTK       | 0.357766567 | mirna_pc |
| 9053 | hsa-mir-103-2 | WDR67     | 0.311115839 | mirna_pc |
| 9054 | hsa-mir-103-2 | HELLS     | 0.434067669 | mirna_pc |
| 9055 | hsa-mir-103-2 | POLE2     | 0.368680743 | mirna_pc |
| 9056 | hsa-mir-103-2 | NCAPD2    | 0.357125117 | mirna_pc |
| 9057 | hsa-mir-103-2 | C6orf167  | 0.379242016 | mirna_pc |
| 9058 | hsa-mir-103-2 | BRCA1     | 0.303780564 | mirna_pc |
| 9059 | hsa-mir-103-2 | HNRNPA2B1 | 0.363610958 | mirna_pc |
| 9060 | hsa-mir-103-2 | C20orf20  | 0.332647949 | mirna_pc |
| 9061 | hsa-mir-103-2 | MCM6      | 0.360695542 | mirna_pc |
| 9062 | hsa-mir-103-2 | BRIP1     | 0.317911306 | mirna_pc |
| 9063 | hsa-mir-103-2 | DCAF13    | 0.307570605 | mirna_pc |
| 9064 | hsa-mir-103-2 | PSMD14    | 0.332574554 | mirna_pc |
| 9065 | hsa-mir-103-2 | UCK2      | 0.342505922 | mirna_pc |
| 9066 | hsa-mir-103-2 | WDHD1     | 0.315481404 | mirna_pc |
| 9067 | hsa-mir-103-2 | NFKBIL2   | 0.337350177 | mirna_pc |
| 9068 | hsa-mir-103-2 | PRIM2     | 0.322029618 | mirna_pc |
| 9069 | hsa-mir-103-2 | ATAD5     | 0.395079599 | mirna_pc |
| 9070 | hsa-mir-103-2 | MTBP      | 0.395376429 | mirna_pc |
| 9071 | hsa-mir-103-2 | E2F1      | 0.318322127 | mirna_pc |

|      |               |          |             |          |
|------|---------------|----------|-------------|----------|
| 9072 | hsa-mir-103-2 | TH1L     | 0.342938281 | mirna_pc |
| 9073 | hsa-mir-103-2 | KIF20B   | 0.313184576 | mirna_pc |
| 9074 | hsa-mir-103-2 | FUS      | 0.327237337 | mirna_pc |
| 9075 | hsa-mir-103-2 | ATAD2    | 0.392933433 | mirna_pc |
| 9076 | hsa-mir-103-2 | CHAF1A   | 0.308609479 | mirna_pc |
| 9077 | hsa-mir-103-2 | DEPDC1B  | 0.414366593 | mirna_pc |
| 9078 | hsa-mir-103-2 | ANP32E   | 0.415420012 | mirna_pc |
| 9079 | hsa-mir-103-2 | CENPO    | 0.328146985 | mirna_pc |
| 9080 | hsa-mir-103-2 | CENPL    | 0.347876522 | mirna_pc |
| 9081 | hsa-mir-103-2 | GEN1     | 0.35499663  | mirna_pc |
| 9082 | hsa-mir-103-2 | DNA2     | 0.405954529 | mirna_pc |
| 9083 | hsa-mir-103-2 | NOP56    | 0.445749892 | mirna_pc |
| 9084 | hsa-mir-103-2 | DSN1     | 0.343651226 | mirna_pc |
| 9085 | hsa-mir-103-2 | CSE1L    | 0.372034304 | mirna_pc |
| 9086 | hsa-mir-103-2 | E2F7     | 0.332833693 | mirna_pc |
| 9087 | hsa-mir-103-2 | RBL1     | 0.324750701 | mirna_pc |
| 9088 | hsa-mir-103-2 | CDK2     | 0.384856372 | mirna_pc |
| 9089 | hsa-mir-103-2 | DLEU2    | 0.322637314 | mirna_pc |
| 9090 | hsa-mir-103-2 | PRIM1    | 0.367338097 | mirna_pc |
| 9091 | hsa-mir-103-2 | CENPH    | 0.300345731 | mirna_pc |
| 9092 | hsa-mir-103-2 | DDX27    | 0.349132403 | mirna_pc |
| 9093 | hsa-mir-103-2 | CHAF1B   | 0.352671226 | mirna_pc |
| 9094 | hsa-mir-103-2 | MSH2     | 0.391942614 | mirna_pc |
| 9095 | hsa-mir-103-2 | DBF4     | 0.332000621 | mirna_pc |
| 9096 | hsa-mir-103-2 | CDC7     | 0.340264497 | mirna_pc |
| 9097 | hsa-mir-103-2 | SSB      | 0.35434308  | mirna_pc |
| 9098 | hsa-mir-103-2 | PUS1     | 0.349771329 | mirna_pc |
| 9099 | hsa-mir-103-2 | FBX05    | 0.373534286 | mirna_pc |
| 9100 | hsa-mir-103-2 | FIGNL1   | 0.300403368 | mirna_pc |
| 9101 | hsa-mir-103-2 | E2F3     | 0.352092234 | mirna_pc |
| 9102 | hsa-mir-103-2 | CDC25A   | 0.410423594 | mirna_pc |
| 9103 | hsa-mir-103-2 | RAD54B   | 0.377393436 | mirna_pc |
| 9104 | hsa-mir-103-2 | PRKDC    | 0.337281768 | mirna_pc |
| 9105 | hsa-mir-103-2 | DDX12    | 0.399376528 | mirna_pc |
| 9106 | hsa-mir-103-2 | MCM8     | 0.514808518 | mirna_pc |
| 9107 | hsa-mir-103-2 | CPSF3    | 0.301842142 | mirna_pc |
| 9108 | hsa-mir-103-2 | C21orf45 | 0.312061072 | mirna_pc |
| 9109 | hsa-mir-103-2 | PUS7     | 0.371706073 | mirna_pc |
| 9110 | hsa-mir-103-2 | DAZAP1   | 0.349825929 | mirna_pc |
| 9111 | hsa-mir-103-2 | TRMT6    | 0.446391671 | mirna_pc |
| 9112 | hsa-mir-103-2 | TMEM201  | 0.303181684 | mirna_pc |
| 9113 | hsa-mir-103-2 | NCL      | 0.313143511 | mirna_pc |
| 9114 | hsa-mir-103-2 | PFDN4    | 0.336160647 | mirna_pc |
| 9115 | hsa-mir-103-2 | SRRT     | 0.375959773 | mirna_pc |
| 9116 | hsa-mir-103-2 | CACYBP   | 0.376970235 | mirna_pc |
| 9117 | hsa-mir-103-2 | SASS6    | 0.339648243 | mirna_pc |
| 9118 | hsa-mir-103-2 | HNRNPM   | 0.346535005 | mirna_pc |
| 9119 | hsa-mir-103-2 | PNPT1    | 0.343638685 | mirna_pc |
| 9120 | hsa-mir-103-2 | TMPO     | 0.414808398 | mirna_pc |
| 9121 | hsa-mir-103-2 | VBP1     | 0.332268481 | mirna_pc |
| 9122 | hsa-mir-103-2 | C20orf72 | 0.36532232  | mirna_pc |
| 9123 | hsa-mir-103-2 | GABPB1   | 0.343852087 | mirna_pc |
| 9124 | hsa-mir-103-2 | DHX9     | 0.397415037 | mirna_pc |
| 9125 | hsa-mir-103-2 | CCDC138  | 0.388407823 | mirna_pc |

|      |               |              |             |          |
|------|---------------|--------------|-------------|----------|
| 9126 | hsa-mir-103-2 | LOC100128191 | 0.346484488 | mirna_pc |
| 9127 | hsa-mir-103-2 | C20orf3      | 0.408655973 | mirna_pc |
| 9128 | hsa-mir-103-2 | PHF6         | 0.349486266 | mirna_pc |
| 9129 | hsa-mir-103-2 | SFRS1        | 0.354582634 | mirna_pc |
| 9130 | hsa-mir-103-2 | WDR43        | 0.301160087 | mirna_pc |
| 9131 | hsa-mir-103-2 | SKP2         | 0.305613932 | mirna_pc |
| 9132 | hsa-mir-103-2 | TIPIN        | 0.31086302  | mirna_pc |
| 9133 | hsa-mir-103-2 | UTP14A       | 0.311285746 | mirna_pc |
| 9134 | hsa-mir-103-2 | RFC5         | 0.350705105 | mirna_pc |
| 9135 | hsa-mir-103-2 | HSPD1        | 0.339520349 | mirna_pc |
| 9136 | hsa-mir-103-2 | FANCG        | 0.311262368 | mirna_pc |
| 9137 | hsa-mir-103-2 | SSRP1        | 0.340014383 | mirna_pc |
| 9138 | hsa-mir-103-2 | KHDRBS1      | 0.326866207 | mirna_pc |
| 9139 | hsa-mir-103-2 | NXT1         | 0.331892221 | mirna_pc |
| 9140 | hsa-mir-103-2 | C20orf27     | 0.385699844 | mirna_pc |
| 9141 | hsa-mir-103-2 | FKBP1A       | 0.310431199 | mirna_pc |
| 9142 | hsa-mir-103-2 | DNAJC2       | 0.314972214 | mirna_pc |
| 9143 | hsa-mir-103-2 | TMEM194A     | 0.303258801 | mirna_pc |
| 9144 | hsa-mir-103-2 | ZNF695       | 0.341930658 | mirna_pc |
| 9145 | hsa-mir-103-2 | KIF24        | 0.322850011 | mirna_pc |
| 9146 | hsa-mir-103-2 | HAUS6        | 0.355417112 | mirna_pc |
| 9147 | hsa-mir-103-2 | CEP135       | 0.31502865  | mirna_pc |
| 9148 | hsa-mir-103-2 | HNRNPU       | 0.39733938  | mirna_pc |
| 9149 | hsa-mir-103-2 | POLR1B       | 0.303262042 | mirna_pc |
| 9150 | hsa-mir-103-2 | WDR76        | 0.304321894 | mirna_pc |
| 9151 | hsa-mir-103-2 | TBCE         | 0.340098153 | mirna_pc |
| 9152 | hsa-mir-103-2 | SUV39H2      | 0.331300296 | mirna_pc |
| 9153 | hsa-mir-103-2 | POP1         | 0.313660821 | mirna_pc |
| 9154 | hsa-mir-103-2 | KIAA0406     | 0.302551429 | mirna_pc |
| 9155 | hsa-mir-103-2 | HSP90B1      | 0.339837726 | mirna_pc |
| 9156 | hsa-mir-103-2 | DHFR         | 0.356027622 | mirna_pc |
| 9157 | hsa-mir-103-2 | NAA25        | 0.318694096 | mirna_pc |
| 9158 | hsa-mir-103-2 | ILF3         | 0.322379618 | mirna_pc |
| 9159 | hsa-mir-103-2 | PUF60        | 0.303931729 | mirna_pc |
| 9160 | hsa-mir-103-2 | DEK          | 0.334223099 | mirna_pc |
| 9161 | hsa-mir-103-2 | PASK         | 0.322376882 | mirna_pc |
| 9162 | hsa-mir-103-2 | TGS1         | 0.308512322 | mirna_pc |
| 9163 | hsa-mir-103-2 | KHSRP        | 0.305511249 | mirna_pc |
| 9164 | hsa-mir-103-2 | SNRPB2       | 0.340207337 | mirna_pc |
| 9165 | hsa-mir-103-2 | ITPA         | 0.33742607  | mirna_pc |
| 9166 | hsa-mir-103-2 | CEP152       | 0.307649461 | mirna_pc |
| 9167 | hsa-mir-103-2 | BAT2L2       | 0.312073301 | mirna_pc |
| 9168 | hsa-mir-103-2 | DDX55        | 0.328230313 | mirna_pc |
| 9169 | hsa-mir-103-2 | LPGAT1       | 0.302112869 | mirna_pc |
| 9170 | hsa-mir-103-2 | FOXN2        | 0.300409233 | mirna_pc |
| 9171 | hsa-mir-103-2 | POLA1        | 0.345242945 | mirna_pc |
| 9172 | hsa-mir-103-2 | HDAC2        | 0.327856594 | mirna_pc |
| 9173 | hsa-mir-103-2 | GMNN         | 0.306962609 | mirna_pc |
| 9174 | hsa-mir-103-2 | ANKRD32      | 0.3405062   | mirna_pc |
| 9175 | hsa-mir-103-2 | CHRA1        | 0.470128493 | mirna_pc |
| 9176 | hsa-mir-103-2 | XRN2         | 0.44902003  | mirna_pc |
| 9177 | hsa-mir-103-2 | KPNB1        | 0.354160996 | mirna_pc |
| 9178 | hsa-mir-103-2 | OTUD6B       | 0.303186756 | mirna_pc |
| 9179 | hsa-mir-103-2 | SMC3         | 0.405981301 | mirna_pc |

|      |               |           |             |          |
|------|---------------|-----------|-------------|----------|
| 9180 | hsa-mir-103-2 | MEX3A     | 0.310342141 | mirna_pc |
| 9181 | hsa-mir-103-2 | NANP      | 0.422872587 | mirna_pc |
| 9182 | hsa-mir-103-2 | LOC642846 | 0.346752318 | mirna_pc |
| 9183 | hsa-mir-103-2 | SNX5      | 0.398487323 | mirna_pc |
| 9184 | hsa-mir-103-2 | NOL10     | 0.330662012 | mirna_pc |
| 9185 | hsa-mir-103-2 | POLE      | 0.40375627  | mirna_pc |
| 9186 | hsa-mir-103-2 | VRK1      | 0.348533236 | mirna_pc |
| 9187 | hsa-mir-103-2 | RBMX      | 0.356026118 | mirna_pc |
| 9188 | hsa-mir-103-2 | NOC3L     | 0.316744037 | mirna_pc |
| 9189 | hsa-mir-103-2 | DAP3      | 0.320703929 | mirna_pc |
| 9190 | hsa-mir-103-2 | PDIA6     | 0.30943948  | mirna_pc |
| 9191 | hsa-mir-103-2 | LTV1      | 0.333428881 | mirna_pc |
| 9192 | hsa-mir-103-2 | TTLL4     | 0.304007175 | mirna_pc |
| 9193 | hsa-mir-103-2 | EIF2C2    | 0.367823001 | mirna_pc |
| 9194 | hsa-mir-103-2 | SNORA8    | 0.312117122 | mirna_pc |
| 9195 | hsa-mir-103-2 | CSNK2A1   | 0.355439566 | mirna_pc |
| 9196 | hsa-mir-103-2 | ARHGAP19  | 0.312858927 | mirna_pc |
| 9197 | hsa-mir-103-2 | TCEA1     | 0.313568103 | mirna_pc |
| 9198 | hsa-mir-103-2 | UPF3B     | 0.343037978 | mirna_pc |
| 9199 | hsa-mir-103-2 | POLR3C    | 0.301501495 | mirna_pc |
| 9200 | hsa-mir-103-2 | TOP 1.00  | 0.331331427 | mirna_pc |
| 9201 | hsa-mir-103-2 | UBE2N     | 0.331963276 | mirna_pc |
| 9202 | hsa-mir-103-2 | TCERG1    | 0.304819709 | mirna_pc |
| 9203 | hsa-mir-103-2 | E2F6      | 0.314148507 | mirna_pc |
| 9204 | hsa-mir-103-2 | GMFB      | 0.300127876 | mirna_pc |
| 9205 | hsa-mir-103-2 | TFAM      | 0.31330486  | mirna_pc |
| 9206 | hsa-mir-103-2 | RTTN      | 0.33065855  | mirna_pc |
| 9207 | hsa-mir-103-2 | SMC1A     | 0.315955367 | mirna_pc |
| 9208 | hsa-mir-103-2 | ANKRD5    | 0.301658431 | mirna_pc |
| 9209 | hsa-mir-103-2 | MRPS26    | 0.368836697 | mirna_pc |
| 9210 | hsa-mir-103-2 | MRPL42    | 0.332078058 | mirna_pc |
| 9211 | hsa-mir-103-2 | CRNKL1    | 0.346049778 | mirna_pc |
| 9212 | hsa-mir-103-2 | SF3B2     | 0.333708888 | mirna_pc |
| 9213 | hsa-mir-103-2 | CCAR1     | 0.301954354 | mirna_pc |
| 9214 | hsa-mir-103-2 | PTK2      | 0.426812062 | mirna_pc |
| 9215 | hsa-mir-103-2 | FASTKD5   | 0.318036952 | mirna_pc |
| 9216 | hsa-mir-103-2 | TASP1     | 0.311707531 | mirna_pc |
| 9217 | hsa-mir-103-2 | NUP43     | 0.371341321 | mirna_pc |
| 9218 | hsa-mir-103-2 | POLR3F    | 0.417544279 | mirna_pc |
| 9219 | hsa-mir-103-2 | CHD1L     | 0.318194265 | mirna_pc |
| 9220 | hsa-mir-103-2 | DCLRE1A   | 0.365493573 | mirna_pc |
| 9221 | hsa-mir-103-2 | GZF1      | 0.30709978  | mirna_pc |
| 9222 | hsa-mir-103-2 | ENTPD6    | 0.301137823 | mirna_pc |
| 9223 | hsa-mir-103-2 | CCNJ      | 0.30584162  | mirna_pc |
| 9224 | hsa-mir-103-2 | ESF1      | 0.348130031 | mirna_pc |
| 9225 | hsa-mir-103-2 | SLC45A4   | 0.321035549 | mirna_pc |
| 9226 | hsa-mir-103-2 | FAM169A   | 0.355366652 | mirna_pc |
| 9227 | hsa-mir-103-2 | MKKS      | 0.344416833 | mirna_pc |
| 9228 | hsa-mir-103-2 | ZCCHC3    | 0.400198838 | mirna_pc |
| 9229 | hsa-mir-103-2 | CTNBL1    | 0.300259839 | mirna_pc |
| 9230 | hsa-mir-103-2 | ZNF343    | 0.31213855  | mirna_pc |
| 9231 | hsa-mir-20a   | MKI67     | 0.346309412 | mirna_pc |
| 9232 | hsa-mir-20a   | TPX2      | 0.344858574 | mirna_pc |
| 9233 | hsa-mir-20a   | KIF4B     | 0.326472561 | mirna_pc |

|                  |           |                      |
|------------------|-----------|----------------------|
| 9234 hsa-mir-20a | TOP2A     | 0.466533344 mirna_pc |
| 9235 hsa-mir-20a | CENPF     | 0.461368538 mirna_pc |
| 9236 hsa-mir-20a | RCC2      | 0.350173913 mirna_pc |
| 9237 hsa-mir-20a | KIF11     | 0.392124838 mirna_pc |
| 9238 hsa-mir-20a | ECT2      | 0.339484734 mirna_pc |
| 9239 hsa-mir-20a | RRM2      | 0.362789285 mirna_pc |
| 9240 hsa-mir-20a | CDK1      | 0.409688062 mirna_pc |
| 9241 hsa-mir-20a | CDC25C    | 0.321071142 mirna_pc |
| 9242 hsa-mir-20a | UBE2C     | 0.34623996 mirna_pc  |
| 9243 hsa-mir-20a | BUB1      | 0.426508256 mirna_pc |
| 9244 hsa-mir-20a | NUSAP1    | 0.327670581 mirna_pc |
| 9245 hsa-mir-20a | MCM4      | 0.307267447 mirna_pc |
| 9246 hsa-mir-20a | KIFC1     | 0.355444671 mirna_pc |
| 9247 hsa-mir-20a | BUB1B     | 0.41559752 mirna_pc  |
| 9248 hsa-mir-20a | HDGF      | 0.309098385 mirna_pc |
| 9249 hsa-mir-20a | KIF18B    | 0.35123287 mirna_pc  |
| 9250 hsa-mir-20a | ASPM      | 0.414289216 mirna_pc |
| 9251 hsa-mir-20a | CKAP2     | 0.460434701 mirna_pc |
| 9252 hsa-mir-20a | FAM72A    | 0.354140987 mirna_pc |
| 9253 hsa-mir-20a | KIF2C     | 0.327414903 mirna_pc |
| 9254 hsa-mir-20a | FANCA     | 0.470610669 mirna_pc |
| 9255 hsa-mir-20a | NCAPG     | 0.433932648 mirna_pc |
| 9256 hsa-mir-20a | CLSPN     | 0.376045459 mirna_pc |
| 9257 hsa-mir-20a | SGOL1     | 0.457247456 mirna_pc |
| 9258 hsa-mir-20a | ARHGAP11A | 0.45887455 mirna_pc  |
| 9259 hsa-mir-20a | CCNA2     | 0.39702536 mirna_pc  |
| 9260 hsa-mir-20a | CBX3      | 0.423556505 mirna_pc |
| 9261 hsa-mir-20a | SPC25     | 0.45706232 mirna_pc  |
| 9262 hsa-mir-20a | NUP62     | 0.323953283 mirna_pc |
| 9263 hsa-mir-20a | FANCI     | 0.378374612 mirna_pc |
| 9264 hsa-mir-20a | NEK2      | 0.48549828 mirna_pc  |
| 9265 hsa-mir-20a | MND1      | 0.321033917 mirna_pc |
| 9266 hsa-mir-20a | KIF22     | 0.30746307 mirna_pc  |
| 9267 hsa-mir-20a | NCAPH     | 0.412159801 mirna_pc |
| 9268 hsa-mir-20a | GTSE1     | 0.411622466 mirna_pc |
| 9269 hsa-mir-20a | KIF23     | 0.301176536 mirna_pc |
| 9270 hsa-mir-20a | RAD54L    | 0.373573199 mirna_pc |
| 9271 hsa-mir-20a | CENPA     | 0.346301659 mirna_pc |
| 9272 hsa-mir-20a | MAD2L1    | 0.48160331 mirna_pc  |
| 9273 hsa-mir-20a | TIMELESS  | 0.383679127 mirna_pc |
| 9274 hsa-mir-20a | LMNB1     | 0.421963203 mirna_pc |
| 9275 hsa-mir-20a | ASF1B     | 0.303603907 mirna_pc |
| 9276 hsa-mir-20a | CDCA8     | 0.38654764 mirna_pc  |
| 9277 hsa-mir-20a | TROAP     | 0.319472295 mirna_pc |
| 9278 hsa-mir-20a | CDCA5     | 0.309339155 mirna_pc |
| 9279 hsa-mir-20a | XPO1      | 0.538612482 mirna_pc |
| 9280 hsa-mir-20a | CDC45     | 0.308167159 mirna_pc |
| 9281 hsa-mir-20a | EXO1      | 0.319327636 mirna_pc |
| 9282 hsa-mir-20a | CDCA2     | 0.363704641 mirna_pc |
| 9283 hsa-mir-20a | DKC1      | 0.331600899 mirna_pc |
| 9284 hsa-mir-20a | UBE2T     | 0.305030297 mirna_pc |
| 9285 hsa-mir-20a | KIF4A     | 0.317628074 mirna_pc |
| 9286 hsa-mir-20a | ORC1L     | 0.317869289 mirna_pc |
| 9287 hsa-mir-20a | KNTC1     | 0.389479181 mirna_pc |



|      |             |           |             |          |
|------|-------------|-----------|-------------|----------|
| 9288 | hsa-mir-20a | CCNF      | 0.307599196 | mirna_pc |
| 9289 | hsa-mir-20a | NUF2      | 0.460144712 | mirna_pc |
| 9290 | hsa-mir-20a | PLK4      | 0.472312697 | mirna_pc |
| 9291 | hsa-mir-20a | FANCB     | 0.378104483 | mirna_pc |
| 9292 | hsa-mir-20a | KIF18A    | 0.397034121 | mirna_pc |
| 9293 | hsa-mir-20a | DEPDC1    | 0.40101601  | mirna_pc |
| 9294 | hsa-mir-20a | SKA3      | 0.556112551 | mirna_pc |
| 9295 | hsa-mir-20a | KIF14     | 0.415500515 | mirna_pc |
| 9296 | hsa-mir-20a | HJURP     | 0.486596479 | mirna_pc |
| 9297 | hsa-mir-20a | SKA1      | 0.324556589 | mirna_pc |
| 9298 | hsa-mir-20a | BLM       | 0.459115563 | mirna_pc |
| 9299 | hsa-mir-20a | DNMT1     | 0.332399538 | mirna_pc |
| 9300 | hsa-mir-20a | PAICS     | 0.476473667 | mirna_pc |
| 9301 | hsa-mir-20a | CCDC150   | 0.469714562 | mirna_pc |
| 9302 | hsa-mir-20a | LIG1      | 0.328608429 | mirna_pc |
| 9303 | hsa-mir-20a | DTL       | 0.420255566 | mirna_pc |
| 9304 | hsa-mir-20a | EME1      | 0.439300501 | mirna_pc |
| 9305 | hsa-mir-20a | RECQL4    | 0.360281561 | mirna_pc |
| 9306 | hsa-mir-20a | AURKA     | 0.301754417 | mirna_pc |
| 9307 | hsa-mir-20a | CENPK     | 0.439561281 | mirna_pc |
| 9308 | hsa-mir-20a | GSG2      | 0.348853521 | mirna_pc |
| 9309 | hsa-mir-20a | CDT1      | 0.300992427 | mirna_pc |
| 9310 | hsa-mir-20a | CBFB      | 0.381079064 | mirna_pc |
| 9311 | hsa-mir-20a | MCM10     | 0.394678354 | mirna_pc |
| 9312 | hsa-mir-20a | SGOL2     | 0.445649374 | mirna_pc |
| 9313 | hsa-mir-20a | CHEK2     | 0.385546943 | mirna_pc |
| 9314 | hsa-mir-20a | CENPE     | 0.454920281 | mirna_pc |
| 9315 | hsa-mir-20a | POLQ      | 0.405306688 | mirna_pc |
| 9316 | hsa-mir-20a | KIF15     | 0.386507565 | mirna_pc |
| 9317 | hsa-mir-20a | CDCA3     | 0.324089165 | mirna_pc |
| 9318 | hsa-mir-20a | C1orf112  | 0.471864475 | mirna_pc |
| 9319 | hsa-mir-20a | GINS1     | 0.406449342 | mirna_pc |
| 9320 | hsa-mir-20a | FEN1      | 0.357297902 | mirna_pc |
| 9321 | hsa-mir-20a | TRAIP     | 0.361907284 | mirna_pc |
| 9322 | hsa-mir-20a | ORC6L     | 0.393518171 | mirna_pc |
| 9323 | hsa-mir-20a | PBK       | 0.310675777 | mirna_pc |
| 9324 | hsa-mir-20a | ARHGAP11B | 0.324889199 | mirna_pc |
| 9325 | hsa-mir-20a | C16orf59  | 0.359485994 | mirna_pc |
| 9326 | hsa-mir-20a | RAE1      | 0.301131047 | mirna_pc |
| 9327 | hsa-mir-20a | FAM72D    | 0.389508925 | mirna_pc |
| 9328 | hsa-mir-20a | FAM72B    | 0.420936826 | mirna_pc |
| 9329 | hsa-mir-20a | EZH2      | 0.385761833 | mirna_pc |
| 9330 | hsa-mir-20a | NEIL3     | 0.378472519 | mirna_pc |
| 9331 | hsa-mir-20a | POLD1     | 0.350128556 | mirna_pc |
| 9332 | hsa-mir-20a | C12orf48  | 0.414336436 | mirna_pc |
| 9333 | hsa-mir-20a | HNRNPL    | 0.339749347 | mirna_pc |
| 9334 | hsa-mir-20a | ZWILCH    | 0.314420481 | mirna_pc |
| 9335 | hsa-mir-20a | SMC4      | 0.317807561 | mirna_pc |
| 9336 | hsa-mir-20a | HMMR      | 0.379580289 | mirna_pc |
| 9337 | hsa-mir-20a | TTK       | 0.375106352 | mirna_pc |
| 9338 | hsa-mir-20a | ZWINT     | 0.372972485 | mirna_pc |
| 9339 | hsa-mir-20a | WDR67     | 0.310426653 | mirna_pc |
| 9340 | hsa-mir-20a | HOXC6     | 0.354922543 | mirna_pc |
| 9341 | hsa-mir-20a | BUB3      | 0.399047043 | mirna_pc |

|                  |           |                      |
|------------------|-----------|----------------------|
| 9342 hsa-mir-20a | HELLS     | 0.444931256 mirna_pc |
| 9343 hsa-mir-20a | NCAPD2    | 0.30623546 mirna_pc  |
| 9344 hsa-mir-20a | HNRNPC    | 0.34072055 mirna_pc  |
| 9345 hsa-mir-20a | TCF3      | 0.336480225 mirna_pc |
| 9346 hsa-mir-20a | C6orf167  | 0.393401677 mirna_pc |
| 9347 hsa-mir-20a | CHEK1     | 0.358504493 mirna_pc |
| 9348 hsa-mir-20a | BRCA1     | 0.415540561 mirna_pc |
| 9349 hsa-mir-20a | HNRNPA2B1 | 0.47747264 mirna_pc  |
| 9350 hsa-mir-20a | RFWD3     | 0.445424573 mirna_pc |
| 9351 hsa-mir-20a | C20orf20  | 0.303135082 mirna_pc |
| 9352 hsa-mir-20a | MCM6      | 0.504364635 mirna_pc |
| 9353 hsa-mir-20a | CDC6      | 0.42751226 mirna_pc  |
| 9354 hsa-mir-20a | CDCA7     | 0.430037115 mirna_pc |
| 9355 hsa-mir-20a | KIAA1524  | 0.317627482 mirna_pc |
| 9356 hsa-mir-20a | BRIP1     | 0.351399248 mirna_pc |
| 9357 hsa-mir-20a | PIF1      | 0.338862144 mirna_pc |
| 9358 hsa-mir-20a | SFRS2     | 0.306775334 mirna_pc |
| 9359 hsa-mir-20a | DCAF13    | 0.36704721 mirna_pc  |
| 9360 hsa-mir-20a | PSMD14    | 0.31003176 mirna_pc  |
| 9361 hsa-mir-20a | UCK2      | 0.325352322 mirna_pc |
| 9362 hsa-mir-20a | NFKBIL2   | 0.319708293 mirna_pc |
| 9363 hsa-mir-20a | C15orf42  | 0.314194524 mirna_pc |
| 9364 hsa-mir-20a | PTGES3    | 0.32154419 mirna_pc  |
| 9365 hsa-mir-20a | PRIM2     | 0.342340468 mirna_pc |
| 9366 hsa-mir-20a | FAM60A    | 0.44586468 mirna_pc  |
| 9367 hsa-mir-20a | ATAD5     | 0.411360519 mirna_pc |
| 9368 hsa-mir-20a | FAM111B   | 0.375239289 mirna_pc |
| 9369 hsa-mir-20a | KIF20B    | 0.42312424 mirna_pc  |
| 9370 hsa-mir-20a | ESCO2     | 0.332316968 mirna_pc |
| 9371 hsa-mir-20a | SNRPA     | 0.314192551 mirna_pc |
| 9372 hsa-mir-20a | FUS       | 0.32433623 mirna_pc  |
| 9373 hsa-mir-20a | ATAD2     | 0.335917685 mirna_pc |
| 9374 hsa-mir-20a | RFC3      | 0.554610063 mirna_pc |
| 9375 hsa-mir-20a | DEPDC1B   | 0.346705143 mirna_pc |
| 9376 hsa-mir-20a | ANP32E    | 0.370239671 mirna_pc |
| 9377 hsa-mir-20a | CENPO     | 0.411509029 mirna_pc |
| 9378 hsa-mir-20a | XRCC2     | 0.45777662 mirna_pc  |
| 9379 hsa-mir-20a | C19orf48  | 0.329038998 mirna_pc |
| 9380 hsa-mir-20a | BRCA2     | 0.469173719 mirna_pc |
| 9381 hsa-mir-20a | CENPL     | 0.364102765 mirna_pc |
| 9382 hsa-mir-20a | GEN1      | 0.468456621 mirna_pc |
| 9383 hsa-mir-20a | HMGB2     | 0.480461134 mirna_pc |
| 9384 hsa-mir-20a | DNA2      | 0.458050619 mirna_pc |
| 9385 hsa-mir-20a | NOP56     | 0.437357387 mirna_pc |
| 9386 hsa-mir-20a | SNHG1     | 0.386259994 mirna_pc |
| 9387 hsa-mir-20a | CSE1L     | 0.320591122 mirna_pc |
| 9388 hsa-mir-20a | DTYMK     | 0.397126233 mirna_pc |
| 9389 hsa-mir-20a | PRMT1     | 0.333731023 mirna_pc |
| 9390 hsa-mir-20a | MLF1IP    | 0.36020994 mirna_pc  |
| 9391 hsa-mir-20a | RAVER1    | 0.302122586 mirna_pc |
| 9392 hsa-mir-20a | HEATR1    | 0.380617847 mirna_pc |
| 9393 hsa-mir-20a | CAD       | 0.346560561 mirna_pc |
| 9394 hsa-mir-20a | CCDC99    | 0.417215094 mirna_pc |
| 9395 hsa-mir-20a | CDK2      | 0.355715973 mirna_pc |

|                  |           |                      |
|------------------|-----------|----------------------|
| 9396 hsa-mir-20a | HOXA10    | 0.331040044 mirna_pc |
| 9397 hsa-mir-20a | HNRNPR    | 0.386896726 mirna_pc |
| 9398 hsa-mir-20a | DLEU2     | 0.461295484 mirna_pc |
| 9399 hsa-mir-20a | PRIM1     | 0.40354317 mirna_pc  |
| 9400 hsa-mir-20a | CENPH     | 0.341791046 mirna_pc |
| 9401 hsa-mir-20a | FERMT1    | 0.340325157 mirna_pc |
| 9402 hsa-mir-20a | TCOF1     | 0.369709964 mirna_pc |
| 9403 hsa-mir-20a | CHAF1B    | 0.335657558 mirna_pc |
| 9404 hsa-mir-20a | NCAPG2    | 0.392553285 mirna_pc |
| 9405 hsa-mir-20a | MSH2      | 0.508892332 mirna_pc |
| 9406 hsa-mir-20a | EIF3B     | 0.310075477 mirna_pc |
| 9407 hsa-mir-20a | NOP58     | 0.342333102 mirna_pc |
| 9408 hsa-mir-20a | EIF2AK1   | 0.326216691 mirna_pc |
| 9409 hsa-mir-20a | SF3B3     | 0.393209046 mirna_pc |
| 9410 hsa-mir-20a | CDC7      | 0.443523088 mirna_pc |
| 9411 hsa-mir-20a | SSB       | 0.564960423 mirna_pc |
| 9412 hsa-mir-20a | PUS1      | 0.386657179 mirna_pc |
| 9413 hsa-mir-20a | NOL11     | 0.406334977 mirna_pc |
| 9414 hsa-mir-20a | FBX05     | 0.435731306 mirna_pc |
| 9415 hsa-mir-20a | WDR75     | 0.310646261 mirna_pc |
| 9416 hsa-mir-20a | FIGNL1    | 0.355873316 mirna_pc |
| 9417 hsa-mir-20a | E2F3      | 0.517482187 mirna_pc |
| 9418 hsa-mir-20a | DDX11     | 0.3762536 mirna_pc   |
| 9419 hsa-mir-20a | CDC25A    | 0.468851172 mirna_pc |
| 9420 hsa-mir-20a | TOPBP1    | 0.318694627 mirna_pc |
| 9421 hsa-mir-20a | TMEM48    | 0.310909804 mirna_pc |
| 9422 hsa-mir-20a | RAD54B    | 0.3191362 mirna_pc   |
| 9423 hsa-mir-20a | DDX12     | 0.369649065 mirna_pc |
| 9424 hsa-mir-20a | DSCC1     | 0.348873352 mirna_pc |
| 9425 hsa-mir-20a | WDR12     | 0.315957178 mirna_pc |
| 9426 hsa-mir-20a | C13orf34  | 0.564588176 mirna_pc |
| 9427 hsa-mir-20a | SMC2      | 0.364592587 mirna_pc |
| 9428 hsa-mir-20a | SRPK1     | 0.353203278 mirna_pc |
| 9429 hsa-mir-20a | MCM8      | 0.484246452 mirna_pc |
| 9430 hsa-mir-20a | CPSF3     | 0.386984276 mirna_pc |
| 9431 hsa-mir-20a | SNRPE     | 0.335600722 mirna_pc |
| 9432 hsa-mir-20a | C21orf45  | 0.368361328 mirna_pc |
| 9433 hsa-mir-20a | ATIC      | 0.437277873 mirna_pc |
| 9434 hsa-mir-20a | TFAP4     | 0.344520641 mirna_pc |
| 9435 hsa-mir-20a | PUS7      | 0.30114487 mirna_pc  |
| 9436 hsa-mir-20a | C14orf106 | 0.362633202 mirna_pc |
| 9437 hsa-mir-20a | CBX8      | 0.398764876 mirna_pc |
| 9438 hsa-mir-20a | TRMT6     | 0.309375274 mirna_pc |
| 9439 hsa-mir-20a | GNPDA1    | 0.323595795 mirna_pc |
| 9440 hsa-mir-20a | NCL       | 0.512370945 mirna_pc |
| 9441 hsa-mir-20a | NUDCD1    | 0.343249616 mirna_pc |
| 9442 hsa-mir-20a | SRRT      | 0.34359164 mirna_pc  |
| 9443 hsa-mir-20a | CACYBP    | 0.395671961 mirna_pc |
| 9444 hsa-mir-20a | SASS6     | 0.369898643 mirna_pc |
| 9445 hsa-mir-20a | PSRC1     | 0.359671973 mirna_pc |
| 9446 hsa-mir-20a | ODF2      | 0.327439683 mirna_pc |
| 9447 hsa-mir-20a | DBF4B     | 0.3741665 mirna_pc   |
| 9448 hsa-mir-20a | POU2F1    | 0.331819584 mirna_pc |
| 9449 hsa-mir-20a | FBL       | 0.347689575 mirna_pc |

|                  |           |                      |
|------------------|-----------|----------------------|
| 9450 hsa-mir-20a | C13orf37  | 0.543128356 mirna_pc |
| 9451 hsa-mir-20a | HNRNPM    | 0.338390803 mirna_pc |
| 9452 hsa-mir-20a | LSM 12.00 | 0.317391843 mirna_pc |
| 9453 hsa-mir-20a | PNPT1     | 0.488657241 mirna_pc |
| 9454 hsa-mir-20a | TMP0      | 0.422488396 mirna_pc |
| 9455 hsa-mir-20a | SET       | 0.391671329 mirna_pc |
| 9456 hsa-mir-20a | C20orf72  | 0.330376289 mirna_pc |
| 9457 hsa-mir-20a | C3orf26   | 0.307721998 mirna_pc |
| 9458 hsa-mir-20a | SMPD4     | 0.354325733 mirna_pc |
| 9459 hsa-mir-20a | GPR19     | 0.312025887 mirna_pc |
| 9460 hsa-mir-20a | PSMD3     | 0.310361942 mirna_pc |
| 9461 hsa-mir-20a | GABPB1    | 0.356627849 mirna_pc |
| 9462 hsa-mir-20a | PPAT      | 0.399955922 mirna_pc |
| 9463 hsa-mir-20a | DHX9      | 0.46786131 mirna_pc  |
| 9464 hsa-mir-20a | CCDC138   | 0.439678268 mirna_pc |
| 9465 hsa-mir-20a | HMG2      | 0.350250452 mirna_pc |
| 9466 hsa-mir-20a | ETV4      | 0.316769699 mirna_pc |
| 9467 hsa-mir-20a | CHRNA5    | 0.335911571 mirna_pc |
| 9468 hsa-mir-20a | PHF6      | 0.320034559 mirna_pc |
| 9469 hsa-mir-20a | SFRS1     | 0.590653131 mirna_pc |
| 9470 hsa-mir-20a | TEX10     | 0.336657969 mirna_pc |
| 9471 hsa-mir-20a | WDR43     | 0.471194714 mirna_pc |
| 9472 hsa-mir-20a | SKP2      | 0.328693186 mirna_pc |
| 9473 hsa-mir-20a | C4orf46   | 0.438123912 mirna_pc |
| 9474 hsa-mir-20a | DARS2     | 0.374646867 mirna_pc |
| 9475 hsa-mir-20a | LYAR      | 0.350771431 mirna_pc |
| 9476 hsa-mir-20a | UTP14A    | 0.322737541 mirna_pc |
| 9477 hsa-mir-20a | C1orf107  | 0.310407668 mirna_pc |
| 9478 hsa-mir-20a | RFC5      | 0.310882488 mirna_pc |
| 9479 hsa-mir-20a | HSPD1     | 0.464968283 mirna_pc |
| 9480 hsa-mir-20a | SSRP1     | 0.375233496 mirna_pc |
| 9481 hsa-mir-20a | POLR2D    | 0.428040699 mirna_pc |
| 9482 hsa-mir-20a | FTSJ2     | 0.367172261 mirna_pc |
| 9483 hsa-mir-20a | PA2G4     | 0.303528779 mirna_pc |
| 9484 hsa-mir-20a | EPT1      | 0.349099563 mirna_pc |
| 9485 hsa-mir-20a | KHDRBS1   | 0.425738446 mirna_pc |
| 9486 hsa-mir-20a | SLC5A6    | 0.314779693 mirna_pc |
| 9487 hsa-mir-20a | TOMM34    | 0.358523671 mirna_pc |
| 9488 hsa-mir-20a | TAF1A     | 0.353857625 mirna_pc |
| 9489 hsa-mir-20a | PRPF40A   | 0.492515301 mirna_pc |
| 9490 hsa-mir-20a | CCDC18    | 0.403722119 mirna_pc |
| 9491 hsa-mir-20a | AHCY      | 0.308337781 mirna_pc |
| 9492 hsa-mir-20a | PARP1     | 0.363602261 mirna_pc |
| 9493 hsa-mir-20a | CCDC34    | 0.388928557 mirna_pc |
| 9494 hsa-mir-20a | CCT7      | 0.301493733 mirna_pc |
| 9495 hsa-mir-20a | HNRNPF    | 0.303917283 mirna_pc |
| 9496 hsa-mir-20a | C4orf21   | 0.332712618 mirna_pc |
| 9497 hsa-mir-20a | TMEM194A  | 0.388762541 mirna_pc |
| 9498 hsa-mir-20a | SLC39A10  | 0.457745629 mirna_pc |
| 9499 hsa-mir-20a | ZNF695    | 0.47877837 mirna_pc  |
| 9500 hsa-mir-20a | PDSS1     | 0.385204412 mirna_pc |
| 9501 hsa-mir-20a | HAUS6     | 0.399753905 mirna_pc |
| 9502 hsa-mir-20a | CENPJ     | 0.519687748 mirna_pc |
| 9503 hsa-mir-20a | LIN9      | 0.382247195 mirna_pc |

|                  |          |                      |
|------------------|----------|----------------------|
| 9504 hsa-mir-20a | C21orf58 | 0.30910045 mirna_pc  |
| 9505 hsa-mir-20a | HNRNPU   | 0.50656789 mirna_pc  |
| 9506 hsa-mir-20a | NASP     | 0.391350996 mirna_pc |
| 9507 hsa-mir-20a | POLR1B   | 0.411278764 mirna_pc |
| 9508 hsa-mir-20a | QSOX2    | 0.340432013 mirna_pc |
| 9509 hsa-mir-20a | PTMA     | 0.366540256 mirna_pc |
| 9510 hsa-mir-20a | PSMD1    | 0.325553168 mirna_pc |
| 9511 hsa-mir-20a | EXOSC2   | 0.321284724 mirna_pc |
| 9512 hsa-mir-20a | HMGXB4   | 0.316032657 mirna_pc |
| 9513 hsa-mir-20a | SCARB1   | 0.334060403 mirna_pc |
| 9514 hsa-mir-20a | C11orf84 | 0.3114457 mirna_pc   |
| 9515 hsa-mir-20a | TBCE     | 0.347330365 mirna_pc |
| 9516 hsa-mir-20a | CLCN2    | 0.317899178 mirna_pc |
| 9517 hsa-mir-20a | SUV39H2  | 0.450964502 mirna_pc |
| 9518 hsa-mir-20a | R3HDM1   | 0.357793508 mirna_pc |
| 9519 hsa-mir-20a | FANCL    | 0.431774365 mirna_pc |
| 9520 hsa-mir-20a | RQCD1    | 0.329845847 mirna_pc |
| 9521 hsa-mir-20a | HNRNPD   | 0.430061418 mirna_pc |
| 9522 hsa-mir-20a | MTHFD2   | 0.399400035 mirna_pc |
| 9523 hsa-mir-20a | GTF2F2   | 0.434103918 mirna_pc |
| 9524 hsa-mir-20a | DDX31    | 0.307880454 mirna_pc |
| 9525 hsa-mir-20a | GTPBP4   | 0.309828174 mirna_pc |
| 9526 hsa-mir-20a | TARDBP   | 0.327290403 mirna_pc |
| 9527 hsa-mir-20a | POP1     | 0.380461682 mirna_pc |
| 9528 hsa-mir-20a | NFE2L3   | 0.311769117 mirna_pc |
| 9529 hsa-mir-20a | SFRS3    | 0.383861954 mirna_pc |
| 9530 hsa-mir-20a | NUP160   | 0.331964868 mirna_pc |
| 9531 hsa-mir-20a | LSM 5.00 | 0.396572077 mirna_pc |
| 9532 hsa-mir-20a | PN01     | 0.370348911 mirna_pc |
| 9533 hsa-mir-20a | CCT4     | 0.319647953 mirna_pc |
| 9534 hsa-mir-20a | ELAVL1   | 0.35133427 mirna_pc  |
| 9535 hsa-mir-20a | ABCE1    | 0.346597268 mirna_pc |
| 9536 hsa-mir-20a | KIAA0406 | 0.319245889 mirna_pc |
| 9537 hsa-mir-20a | HSP90B1  | 0.339018023 mirna_pc |
| 9538 hsa-mir-20a | NAE1     | 0.350990928 mirna_pc |
| 9539 hsa-mir-20a | PSMC3IP  | 0.327652088 mirna_pc |
| 9540 hsa-mir-20a | PAK1IP1  | 0.365271368 mirna_pc |
| 9541 hsa-mir-20a | NUDT15   | 0.465552042 mirna_pc |
| 9542 hsa-mir-20a | FASTKD1  | 0.321171115 mirna_pc |
| 9543 hsa-mir-20a | SUPT16H  | 0.30886495 mirna_pc  |
| 9544 hsa-mir-20a | SLMO2    | 0.306363272 mirna_pc |
| 9545 hsa-mir-20a | TWISTNB  | 0.369919307 mirna_pc |
| 9546 hsa-mir-20a | ATP13A3  | 0.312426461 mirna_pc |
| 9547 hsa-mir-20a | DHFR     | 0.415271548 mirna_pc |
| 9548 hsa-mir-20a | NAA25    | 0.426696337 mirna_pc |
| 9549 hsa-mir-20a | ILF3     | 0.446055179 mirna_pc |
| 9550 hsa-mir-20a | C1orf96  | 0.32152203 mirna_pc  |
| 9551 hsa-mir-20a | EHMT2    | 0.33068405 mirna_pc  |
| 9552 hsa-mir-20a | KDM1B    | 0.32429092 mirna_pc  |
| 9553 hsa-mir-20a | GART     | 0.311220577 mirna_pc |
| 9554 hsa-mir-20a | DEK      | 0.434143797 mirna_pc |
| 9555 hsa-mir-20a | TBC1D4   | 0.441894087 mirna_pc |
| 9556 hsa-mir-20a | TRIB3    | 0.367867521 mirna_pc |
| 9557 hsa-mir-20a | CCNE2    | 0.316063807 mirna_pc |

|                  |          |                      |
|------------------|----------|----------------------|
| 9558 hsa-mir-20a | PASK     | 0.422657108 mirna_pc |
| 9559 hsa-mir-20a | USP42    | 0.32100959 mirna_pc  |
| 9560 hsa-mir-20a | SAAL1    | 0.388957386 mirna_pc |
| 9561 hsa-mir-20a | C1orf131 | 0.322305157 mirna_pc |
| 9562 hsa-mir-20a | RPGRIP1L | 0.37676434 mirna_pc  |
| 9563 hsa-mir-20a | ATP11A   | 0.325990128 mirna_pc |
| 9564 hsa-mir-20a | TGS1     | 0.402899233 mirna_pc |
| 9565 hsa-mir-20a | HEATR2   | 0.475280658 mirna_pc |
| 9566 hsa-mir-20a | PRAME    | 0.365880704 mirna_pc |
| 9567 hsa-mir-20a | CYB5B    | 0.317367173 mirna_pc |
| 9568 hsa-mir-20a | SNRPB2   | 0.353212953 mirna_pc |
| 9569 hsa-mir-20a | FUBP1    | 0.380688114 mirna_pc |
| 9570 hsa-mir-20a | IPO9     | 0.346844584 mirna_pc |
| 9571 hsa-mir-20a | SART3    | 0.321611847 mirna_pc |
| 9572 hsa-mir-20a | HNRNPK   | 0.427179507 mirna_pc |
| 9573 hsa-mir-20a | SR140    | 0.377594496 mirna_pc |
| 9574 hsa-mir-20a | TRA2B    | 0.335891847 mirna_pc |
| 9575 hsa-mir-20a | GAR1     | 0.384175965 mirna_pc |
| 9576 hsa-mir-20a | CEP152   | 0.401955276 mirna_pc |
| 9577 hsa-mir-20a | C15orf23 | 0.350533432 mirna_pc |
| 9578 hsa-mir-20a | ZC3HAV1L | 0.317673842 mirna_pc |
| 9579 hsa-mir-20a | PRMT3    | 0.302405952 mirna_pc |
| 9580 hsa-mir-20a | SLM01    | 0.307406192 mirna_pc |
| 9581 hsa-mir-20a | INTS6    | 0.305221007 mirna_pc |
| 9582 hsa-mir-20a | WHSC1    | 0.36949542 mirna_pc  |
| 9583 hsa-mir-20a | RNF219   | 0.651563367 mirna_pc |
| 9584 hsa-mir-20a | ITGB3BP  | 0.378677903 mirna_pc |
| 9585 hsa-mir-20a | SLC25A32 | 0.371598132 mirna_pc |
| 9586 hsa-mir-20a | ENOPH1   | 0.366313247 mirna_pc |
| 9587 hsa-mir-20a | PABPC1L  | 0.327541291 mirna_pc |
| 9588 hsa-mir-20a | C17orf42 | 0.339940139 mirna_pc |
| 9589 hsa-mir-20a | C4orf43  | 0.318283774 mirna_pc |
| 9590 hsa-mir-20a | ING5     | 0.31629125 mirna_pc  |
| 9591 hsa-mir-20a | DDX55    | 0.399428618 mirna_pc |
| 9592 hsa-mir-20a | CEP78    | 0.396977304 mirna_pc |
| 9593 hsa-mir-20a | PLEKHG4  | 0.306875131 mirna_pc |
| 9594 hsa-mir-20a | SFPQ     | 0.3919533 mirna_pc   |
| 9595 hsa-mir-20a | RCOR2    | 0.385235746 mirna_pc |
| 9596 hsa-mir-20a | MPHOSPH9 | 0.341368744 mirna_pc |
| 9597 hsa-mir-20a | POLA1    | 0.34074529 mirna_pc  |
| 9598 hsa-mir-20a | HDAC2    | 0.432169983 mirna_pc |
| 9599 hsa-mir-20a | GMNN     | 0.31304486 mirna_pc  |
| 9600 hsa-mir-20a | POLG2    | 0.309322562 mirna_pc |
| 9601 hsa-mir-20a | ANKRD32  | 0.314201508 mirna_pc |
| 9602 hsa-mir-20a | C10orf2  | 0.407190015 mirna_pc |
| 9603 hsa-mir-20a | POGK     | 0.304007643 mirna_pc |
| 9604 hsa-mir-20a | KIAA0564 | 0.323947527 mirna_pc |
| 9605 hsa-mir-20a | GEMIN6   | 0.306043768 mirna_pc |
| 9606 hsa-mir-20a | MSH6     | 0.358199859 mirna_pc |
| 9607 hsa-mir-20a | XRN2     | 0.39457673 mirna_pc  |
| 9608 hsa-mir-20a | KPNB1    | 0.490951189 mirna_pc |
| 9609 hsa-mir-20a | OTUD6B   | 0.341088169 mirna_pc |
| 9610 hsa-mir-20a | SMC3     | 0.447170743 mirna_pc |
| 9611 hsa-mir-20a | FLVCR1   | 0.386309189 mirna_pc |

|                  |           |                      |
|------------------|-----------|----------------------|
| 9612 hsa-mir-20a | HNRNPA1   | 0.370314335 mirna_pc |
| 9613 hsa-mir-20a | UBA2      | 0.348001554 mirna_pc |
| 9614 hsa-mir-20a | ZBED4     | 0.341417791 mirna_pc |
| 9615 hsa-mir-20a | MEX3A     | 0.475403555 mirna_pc |
| 9616 hsa-mir-20a | BAT1      | 0.390668852 mirna_pc |
| 9617 hsa-mir-20a | COIL      | 0.41504697 mirna_pc  |
| 9618 hsa-mir-20a | PHF14     | 0.370758267 mirna_pc |
| 9619 hsa-mir-20a | PDCD11    | 0.319785348 mirna_pc |
| 9620 hsa-mir-20a | TAF5      | 0.385006779 mirna_pc |
| 9621 hsa-mir-20a | NANP      | 0.319625775 mirna_pc |
| 9622 hsa-mir-20a | SUZ12     | 0.386015311 mirna_pc |
| 9623 hsa-mir-20a | HNRNPA1L2 | 0.421123762 mirna_pc |
| 9624 hsa-mir-20a | NAA15     | 0.323018102 mirna_pc |
| 9625 hsa-mir-20a | BARD1     | 0.32715124 mirna_pc  |
| 9626 hsa-mir-20a | CBX1      | 0.300696274 mirna_pc |
| 9627 hsa-mir-20a | NCBP1     | 0.325741727 mirna_pc |
| 9628 hsa-mir-20a | HMGB1     | 0.568006091 mirna_pc |
| 9629 hsa-mir-20a | ZBTB12    | 0.450307729 mirna_pc |
| 9630 hsa-mir-20a | DIAPH3    | 0.407122653 mirna_pc |
| 9631 hsa-mir-20a | TADA1     | 0.313849032 mirna_pc |
| 9632 hsa-mir-20a | USP1      | 0.346581875 mirna_pc |
| 9633 hsa-mir-20a | TMEM68    | 0.375415982 mirna_pc |
| 9634 hsa-mir-20a | LOC642846 | 0.328908665 mirna_pc |
| 9635 hsa-mir-20a | TGIF2     | 0.426536987 mirna_pc |
| 9636 hsa-mir-20a | H3F3A     | 0.330461758 mirna_pc |
| 9637 hsa-mir-20a | SNAPC4    | 0.327659299 mirna_pc |
| 9638 hsa-mir-20a | ZC3H18    | 0.361258934 mirna_pc |
| 9639 hsa-mir-20a | FARSB     | 0.395445021 mirna_pc |
| 9640 hsa-mir-20a | PIK3AP1   | 0.3017297 mirna_pc   |
| 9641 hsa-mir-20a | SNX5      | 0.334922394 mirna_pc |
| 9642 hsa-mir-20a | THUMPD2   | 0.345886482 mirna_pc |
| 9643 hsa-mir-20a | MTF2      | 0.337674542 mirna_pc |
| 9644 hsa-mir-20a | NOL10     | 0.402485893 mirna_pc |
| 9645 hsa-mir-20a | ANAPC1    | 0.33692445 mirna_pc  |
| 9646 hsa-mir-20a | POLE      | 0.40624374 mirna_pc  |
| 9647 hsa-mir-20a | Clorf163  | 0.301185401 mirna_pc |
| 9648 hsa-mir-20a | TAF1B     | 0.327136934 mirna_pc |
| 9649 hsa-mir-20a | SOX9      | 0.362904041 mirna_pc |
| 9650 hsa-mir-20a | PPP3R1    | 0.324498524 mirna_pc |
| 9651 hsa-mir-20a | TIMM50    | 0.361519685 mirna_pc |
| 9652 hsa-mir-20a | C13orf27  | 0.494060829 mirna_pc |
| 9653 hsa-mir-20a | RBM14     | 0.316112919 mirna_pc |
| 9654 hsa-mir-20a | EXOSC9    | 0.37081004 mirna_pc  |
| 9655 hsa-mir-20a | TMEM209   | 0.343273945 mirna_pc |
| 9656 hsa-mir-20a | CCDC43    | 0.302331119 mirna_pc |
| 9657 hsa-mir-20a | RBMX      | 0.496714646 mirna_pc |
| 9658 hsa-mir-20a | SRP9      | 0.403343772 mirna_pc |
| 9659 hsa-mir-20a | CCDC41    | 0.330488422 mirna_pc |
| 9660 hsa-mir-20a | NOC3L     | 0.36681811 mirna_pc  |
| 9661 hsa-mir-20a | UCLH3     | 0.309544423 mirna_pc |
| 9662 hsa-mir-20a | GPR180    | 0.465731597 mirna_pc |
| 9663 hsa-mir-20a | DAP3      | 0.359669342 mirna_pc |
| 9664 hsa-mir-20a | IQCB1     | 0.324284128 mirna_pc |
| 9665 hsa-mir-20a | MDC 1.00  | 0.325631928 mirna_pc |

|                  |          |                      |
|------------------|----------|----------------------|
| 9666 hsa-mir-20a | XRCC5    | 0.475895116 mirna_pc |
| 9667 hsa-mir-20a | SNX25    | 0.317142252 mirna_pc |
| 9668 hsa-mir-20a | EXOSC8   | 0.439723783 mirna_pc |
| 9669 hsa-mir-20a | CTCF     | 0.369946439 mirna_pc |
| 9670 hsa-mir-20a | TAF1D    | 0.316604372 mirna_pc |
| 9671 hsa-mir-20a | PDIA6    | 0.363085608 mirna_pc |
| 9672 hsa-mir-20a | RPE      | 0.382744295 mirna_pc |
| 9673 hsa-mir-20a | LBR      | 0.418362045 mirna_pc |
| 9674 hsa-mir-20a | DNAJC14  | 0.30519721 mirna_pc  |
| 9675 hsa-mir-20a | ZNF519   | 0.392502396 mirna_pc |
| 9676 hsa-mir-20a | ORC2L    | 0.332095349 mirna_pc |
| 9677 hsa-mir-20a | ZRANB3   | 0.352160576 mirna_pc |
| 9678 hsa-mir-20a | RIF1     | 0.376534486 mirna_pc |
| 9679 hsa-mir-20a | TFB2M    | 0.310493016 mirna_pc |
| 9680 hsa-mir-20a | SRBD1    | 0.30888424 mirna_pc  |
| 9681 hsa-mir-20a | NUDT21   | 0.358235247 mirna_pc |
| 9682 hsa-mir-20a | SCLT1    | 0.334397458 mirna_pc |
| 9683 hsa-mir-20a | DDX10    | 0.304744709 mirna_pc |
| 9684 hsa-mir-20a | LTV1     | 0.303363591 mirna_pc |
| 9685 hsa-mir-20a | CCDC14   | 0.336542645 mirna_pc |
| 9686 hsa-mir-20a | SUZ12P   | 0.305757067 mirna_pc |
| 9687 hsa-mir-20a | FAM136A  | 0.434406854 mirna_pc |
| 9688 hsa-mir-20a | NRAS     | 0.350215885 mirna_pc |
| 9689 hsa-mir-20a | HMGNI    | 0.31518639 mirna_pc  |
| 9690 hsa-mir-20a | C1orf124 | 0.314837076 mirna_pc |
| 9691 hsa-mir-20a | MTPAP    | 0.324965751 mirna_pc |
| 9692 hsa-mir-20a | ITPRIPL1 | 0.349272438 mirna_pc |
| 9693 hsa-mir-20a | TTLL4    | 0.37717606 mirna_pc  |
| 9694 hsa-mir-20a | FBX041   | 0.33165527 mirna_pc  |
| 9695 hsa-mir-20a | BIVM     | 0.368843252 mirna_pc |
| 9696 hsa-mir-20a | THADA    | 0.333172278 mirna_pc |
| 9697 hsa-mir-20a | GPATCH4  | 0.309455476 mirna_pc |
| 9698 hsa-mir-20a | EML4     | 0.34252467 mirna_pc  |
| 9699 hsa-mir-20a | BZW2     | 0.394567808 mirna_pc |
| 9700 hsa-mir-20a | LRPPRC   | 0.422300813 mirna_pc |
| 9701 hsa-mir-20a | CSNK2A1  | 0.360981682 mirna_pc |
| 9702 hsa-mir-20a | RPIA     | 0.453724371 mirna_pc |
| 9703 hsa-mir-20a | NUP133   | 0.323648697 mirna_pc |
| 9704 hsa-mir-20a | C7orf44  | 0.382896987 mirna_pc |
| 9705 hsa-mir-20a | URB2     | 0.391364566 mirna_pc |
| 9706 hsa-mir-20a | RP9      | 0.323923189 mirna_pc |
| 9707 hsa-mir-20a | KIAA1731 | 0.340437628 mirna_pc |
| 9708 hsa-mir-20a | ZNF286A  | 0.40630124 mirna_pc  |
| 9709 hsa-mir-20a | NAA16    | 0.332518125 mirna_pc |
| 9710 hsa-mir-20a | SFXN4    | 0.333012838 mirna_pc |
| 9711 hsa-mir-20a | TCEA1    | 0.345411258 mirna_pc |
| 9712 hsa-mir-20a | RBM28    | 0.396374987 mirna_pc |
| 9713 hsa-mir-20a | RANBP17  | 0.341293041 mirna_pc |
| 9714 hsa-mir-20a | MRE11A   | 0.341267765 mirna_pc |
| 9715 hsa-mir-20a | WDR85    | 0.307239796 mirna_pc |
| 9716 hsa-mir-20a | USP37    | 0.368746973 mirna_pc |
| 9717 hsa-mir-20a | ILKAP    | 0.364353397 mirna_pc |
| 9718 hsa-mir-20a | DLEU1    | 0.400567117 mirna_pc |
| 9719 hsa-mir-20a | C13orf23 | 0.443653722 mirna_pc |



|                  |          |                      |
|------------------|----------|----------------------|
| 9720 hsa-mir-20a | RBM12    | 0.413267795 mirna_pc |
| 9721 hsa-mir-20a | ZNF286B  | 0.345501772 mirna_pc |
| 9722 hsa-mir-20a | DDX20    | 0.305679649 mirna_pc |
| 9723 hsa-mir-20a | CHD7     | 0.349404787 mirna_pc |
| 9724 hsa-mir-20a | TOP 1.00 | 0.306656966 mirna_pc |
| 9725 hsa-mir-20a | TCERG1   | 0.469142483 mirna_pc |
| 9726 hsa-mir-20a | PSPC1    | 0.468915319 mirna_pc |
| 9727 hsa-mir-20a | CCNB1IP1 | 0.333738302 mirna_pc |
| 9728 hsa-mir-20a | TOP1P1   | 0.313452568 mirna_pc |
| 9729 hsa-mir-20a | MAPKAPK5 | 0.340541202 mirna_pc |
| 9730 hsa-mir-20a | GMCL1    | 0.361933313 mirna_pc |
| 9731 hsa-mir-20a | E2F6     | 0.467874292 mirna_pc |
| 9732 hsa-mir-20a | SLC25A15 | 0.440964867 mirna_pc |
| 9733 hsa-mir-20a | SFRS13A  | 0.494101822 mirna_pc |
| 9734 hsa-mir-20a | SCLY     | 0.423310896 mirna_pc |
| 9735 hsa-mir-20a | FASTKD2  | 0.320168837 mirna_pc |
| 9736 hsa-mir-20a | STARD7   | 0.314020153 mirna_pc |
| 9737 hsa-mir-20a | NUP35    | 0.304978147 mirna_pc |
| 9738 hsa-mir-20a | SLC19A1  | 0.308689611 mirna_pc |
| 9739 hsa-mir-20a | TGDS     | 0.455976981 mirna_pc |
| 9740 hsa-mir-20a | TFAM     | 0.468799904 mirna_pc |
| 9741 hsa-mir-20a | LDLRAD3  | 0.3280855 mirna_pc   |
| 9742 hsa-mir-20a | ZNHIT6   | 0.311958672 mirna_pc |
| 9743 hsa-mir-20a | GSTCD    | 0.303692829 mirna_pc |
| 9744 hsa-mir-20a | ORC4L    | 0.465184713 mirna_pc |
| 9745 hsa-mir-20a | ZC3H15   | 0.317577248 mirna_pc |
| 9746 hsa-mir-20a | KIAA1704 | 0.426920376 mirna_pc |
| 9747 hsa-mir-20a | MTIF2    | 0.460299035 mirna_pc |
| 9748 hsa-mir-20a | HNRNPA3  | 0.40325923 mirna_pc  |
| 9749 hsa-mir-20a | MSL1     | 0.382441225 mirna_pc |
| 9750 hsa-mir-20a | EWSR1    | 0.38462483 mirna_pc  |
| 9751 hsa-mir-20a | ZNF828   | 0.473774581 mirna_pc |
| 9752 hsa-mir-20a | SMC1A    | 0.367327633 mirna_pc |
| 9753 hsa-mir-20a | DHX57    | 0.351135934 mirna_pc |
| 9754 hsa-mir-20a | NUPL1    | 0.595830771 mirna_pc |
| 9755 hsa-mir-20a | DARS     | 0.306890284 mirna_pc |
| 9756 hsa-mir-20a | CCDC45   | 0.336744317 mirna_pc |
| 9757 hsa-mir-20a | WBP4     | 0.387832723 mirna_pc |
| 9758 hsa-mir-20a | SFT2D3   | 0.332817048 mirna_pc |
| 9759 hsa-mir-20a | ANKRD5   | 0.332744542 mirna_pc |
| 9760 hsa-mir-20a | TUBGCP3  | 0.339214168 mirna_pc |
| 9761 hsa-mir-20a | MRPL30   | 0.337040009 mirna_pc |
| 9762 hsa-mir-20a | GNL3     | 0.300998556 mirna_pc |
| 9763 hsa-mir-20a | TSGA14   | 0.334983145 mirna_pc |
| 9764 hsa-mir-20a | TYW1     | 0.318257285 mirna_pc |
| 9765 hsa-mir-20a | UPF3A    | 0.447533465 mirna_pc |
| 9766 hsa-mir-20a | SFRS7    | 0.423029495 mirna_pc |
| 9767 hsa-mir-20a | MRPL42   | 0.389470989 mirna_pc |
| 9768 hsa-mir-20a | BEND3    | 0.333932229 mirna_pc |
| 9769 hsa-mir-20a | NFXL1    | 0.342699543 mirna_pc |
| 9770 hsa-mir-20a | PFAS     | 0.325723608 mirna_pc |
| 9771 hsa-mir-20a | CNOT6    | 0.304799799 mirna_pc |
| 9772 hsa-mir-20a | UCHL5    | 0.338986523 mirna_pc |
| 9773 hsa-mir-20a | CCAR1    | 0.389470126 mirna_pc |

|                  |          |                      |
|------------------|----------|----------------------|
| 9774 hsa-mir-20a | CDCA7L   | 0.393947648 mirna_pc |
| 9775 hsa-mir-20a | KBTBD7   | 0.313782987 mirna_pc |
| 9776 hsa-mir-20a | HNRNPH1  | 0.335701776 mirna_pc |
| 9777 hsa-mir-20a | NUP153   | 0.312922341 mirna_pc |
| 9778 hsa-mir-20a | NIPSNAP1 | 0.305863629 mirna_pc |
| 9779 hsa-mir-20a | SERBP1   | 0.324709497 mirna_pc |
| 9780 hsa-mir-20a | EPRS     | 0.314669477 mirna_pc |
| 9781 hsa-mir-20a | WDR92    | 0.348223616 mirna_pc |
| 9782 hsa-mir-20a | ZNF214   | 0.329744116 mirna_pc |
| 9783 hsa-mir-20a | MCM3APAS | 0.343752529 mirna_pc |
| 9784 hsa-mir-20a | SLC35F2  | 0.328560848 mirna_pc |
| 9785 hsa-mir-20a | RCBTB1   | 0.340009951 mirna_pc |
| 9786 hsa-mir-20a | CDC16    | 0.40648506 mirna_pc  |
| 9787 hsa-mir-20a | ING1     | 0.357691464 mirna_pc |
| 9788 hsa-mir-20a | CDK8     | 0.300046023 mirna_pc |
| 9789 hsa-mir-20a | MRPL44   | 0.31078434 mirna_pc  |
| 9790 hsa-mir-20a | PTCD3    | 0.406979463 mirna_pc |
| 9791 hsa-mir-20a | SPRY4    | 0.304536291 mirna_pc |
| 9792 hsa-mir-20a | CASP8AP2 | 0.331857694 mirna_pc |
| 9793 hsa-mir-20a | RNF6     | 0.383045874 mirna_pc |
| 9794 hsa-mir-20a | BCAN     | 0.347379379 mirna_pc |
| 9795 hsa-mir-20a | DHX15    | 0.346914745 mirna_pc |
| 9796 hsa-mir-20a | ZNF669   | 0.315799157 mirna_pc |
| 9797 hsa-mir-20a | PRPF4B   | 0.3271474 mirna_pc   |
| 9798 hsa-mir-20a | ALG5     | 0.302844514 mirna_pc |
| 9799 hsa-mir-20a | IWS1     | 0.404514892 mirna_pc |
| 9800 hsa-mir-20a | MAP2K6   | 0.342569838 mirna_pc |
| 9801 hsa-mir-20a | CASP6    | 0.305327289 mirna_pc |
| 9802 hsa-mir-20a | RBM26    | 0.46203967 mirna_pc  |
| 9803 hsa-mir-20a | DCP2     | 0.308227409 mirna_pc |
| 9804 hsa-mir-20a | ZNF92    | 0.391366741 mirna_pc |
| 9805 hsa-mir-20a | TMTC4    | 0.413819575 mirna_pc |
| 9806 hsa-mir-20a | SEPHS1   | 0.355919941 mirna_pc |
| 9807 hsa-mir-20a | CBX5     | 0.312012989 mirna_pc |
| 9808 hsa-mir-20a | RMND1    | 0.360513344 mirna_pc |
| 9809 hsa-mir-20a | ADNP     | 0.325923623 mirna_pc |
| 9810 hsa-mir-20a | UGGT2    | 0.303425925 mirna_pc |
| 9811 hsa-mir-20a | AZIN1    | 0.390685808 mirna_pc |
| 9812 hsa-mir-20a | HNRPLL   | 0.322571561 mirna_pc |
| 9813 hsa-mir-20a | RSL1D1   | 0.348725897 mirna_pc |
| 9814 hsa-mir-20a | CEBPZ    | 0.439308318 mirna_pc |
| 9815 hsa-mir-20a | FASTKD5  | 0.312245685 mirna_pc |
| 9816 hsa-mir-20a | SMARCE1  | 0.39132781 mirna_pc  |
| 9817 hsa-mir-20a | C8orf33  | 0.359500229 mirna_pc |
| 9818 hsa-mir-20a | TASP1    | 0.373924261 mirna_pc |
| 9819 hsa-mir-20a | MRP63    | 0.304341747 mirna_pc |
| 9820 hsa-mir-20a | IPO5     | 0.593642512 mirna_pc |
| 9821 hsa-mir-20a | ALG11    | 0.377193713 mirna_pc |
| 9822 hsa-mir-20a | MCCC2    | 0.327156518 mirna_pc |
| 9823 hsa-mir-20a | NRF1     | 0.305878898 mirna_pc |
| 9824 hsa-mir-20a | IDI2     | 0.302520025 mirna_pc |
| 9825 hsa-mir-20a | GNPAT    | 0.311215041 mirna_pc |
| 9826 hsa-mir-20a | MED28    | 0.307629541 mirna_pc |
| 9827 hsa-mir-20a | MATR3    | 0.304670055 mirna_pc |

|      |             |          |             |          |
|------|-------------|----------|-------------|----------|
| 9828 | hsa-mir-20a | NARS2    | 0.305859713 | mirna_pc |
| 9829 | hsa-mir-20a | NUP43    | 0.349261309 | mirna_pc |
| 9830 | hsa-mir-20a | BRD3     | 0.304730119 | mirna_pc |
| 9831 | hsa-mir-20a | MTRF1    | 0.329578452 | mirna_pc |
| 9832 | hsa-mir-20a | CELF1    | 0.304571384 | mirna_pc |
| 9833 | hsa-mir-20a | ZNF124   | 0.432382756 | mirna_pc |
| 9834 | hsa-mir-20a | RNASEH2B | 0.462245093 | mirna_pc |
| 9835 | hsa-mir-20a | CHD1L    | 0.342310389 | mirna_pc |
| 9836 | hsa-mir-20a | ZNF473   | 0.418909216 | mirna_pc |
| 9837 | hsa-mir-20a | UGGT1    | 0.306147832 | mirna_pc |
| 9838 | hsa-mir-20a | ALMS1    | 0.309834867 | mirna_pc |
| 9839 | hsa-mir-20a | SNRNP48  | 0.342855301 | mirna_pc |
| 9840 | hsa-mir-20a | RFXAP    | 0.370706808 | mirna_pc |
| 9841 | hsa-mir-20a | DCLRE1A  | 0.402623193 | mirna_pc |
| 9842 | hsa-mir-20a | ANP32A   | 0.451909762 | mirna_pc |
| 9843 | hsa-mir-20a | DIS3     | 0.394768199 | mirna_pc |
| 9844 | hsa-mir-20a | E2F5     | 0.407021121 | mirna_pc |
| 9845 | hsa-mir-20a | STARD3   | 0.304363544 | mirna_pc |
| 9846 | hsa-mir-20a | NUFIP1   | 0.555394403 | mirna_pc |
| 9847 | hsa-mir-20a | ZNF195   | 0.470336618 | mirna_pc |
| 9848 | hsa-mir-20a | ZMYM4    | 0.321938797 | mirna_pc |
| 9849 | hsa-mir-20a | DCAF17   | 0.333689125 | mirna_pc |
| 9850 | hsa-mir-20a | PRKAR1B  | 0.339021688 | mirna_pc |
| 9851 | hsa-mir-20a | GZF1     | 0.312827372 | mirna_pc |
| 9852 | hsa-mir-20a | BCAS2    | 0.341331872 | mirna_pc |
| 9853 | hsa-mir-20a | MED4     | 0.354986552 | mirna_pc |
| 9854 | hsa-mir-20a | USP45    | 0.314328944 | mirna_pc |
| 9855 | hsa-mir-20a | LRRCC1   | 0.400561301 | mirna_pc |
| 9856 | hsa-mir-20a | FAM98B   | 0.309212461 | mirna_pc |
| 9857 | hsa-mir-20a | NEK3     | 0.377871712 | mirna_pc |
| 9858 | hsa-mir-20a | FUBP3    | 0.315090596 | mirna_pc |
| 9859 | hsa-mir-20a | HNRNPH3  | 0.372478695 | mirna_pc |
| 9860 | hsa-mir-20a | RRP1B    | 0.332091627 | mirna_pc |
| 9861 | hsa-mir-20a | THSD1P1  | 0.332265583 | mirna_pc |
| 9862 | hsa-mir-20a | NSL1     | 0.364852368 | mirna_pc |
| 9863 | hsa-mir-20a | VIL1     | 0.300327484 | mirna_pc |
| 9864 | hsa-mir-20a | GSDMB    | 0.358032024 | mirna_pc |
| 9865 | hsa-mir-20a | ZNF12    | 0.308267334 | mirna_pc |
| 9866 | hsa-mir-20a | TMEM170A | 0.417260756 | mirna_pc |
| 9867 | hsa-mir-20a | AHCTF1   | 0.340608276 | mirna_pc |
| 9868 | hsa-mir-20a | KIAA1383 | 0.320545302 | mirna_pc |
| 9869 | hsa-mir-20a | FAM48A   | 0.528917153 | mirna_pc |
| 9870 | hsa-mir-20a | PMS1     | 0.441278591 | mirna_pc |
| 9871 | hsa-mir-20a | PNN      | 0.372202533 | mirna_pc |
| 9872 | hsa-mir-20a | MNS1     | 0.394523773 | mirna_pc |
| 9873 | hsa-mir-20a | CHCHD3   | 0.300479364 | mirna_pc |
| 9874 | hsa-mir-20a | PAN3     | 0.365447613 | mirna_pc |
| 9875 | hsa-mir-20a | CCDC122  | 0.433586418 | mirna_pc |
| 9876 | hsa-mir-20a | TRUB1    | 0.405733947 | mirna_pc |
| 9877 | hsa-mir-20a | ZMYM2    | 0.452034844 | mirna_pc |
| 9878 | hsa-mir-20a | UGT8     | 0.307096409 | mirna_pc |
| 9879 | hsa-mir-20a | CCNJ     | 0.519133125 | mirna_pc |
| 9880 | hsa-mir-20a | WDR33    | 0.310924771 | mirna_pc |
| 9881 | hsa-mir-20a | PIBF1    | 0.385701376 | mirna_pc |

|      |             |            |             |          |
|------|-------------|------------|-------------|----------|
| 9882 | hsa-mir-20a | DCAF16     | 0.376166222 | mirna_pc |
| 9883 | hsa-mir-20a | SBK1       | 0.344263418 | mirna_pc |
| 9884 | hsa-mir-20a | IPO7       | 0.346517641 | mirna_pc |
| 9885 | hsa-mir-20a | ABCC4      | 0.385673184 | mirna_pc |
| 9886 | hsa-mir-20a | KBTBD6     | 0.41427795  | mirna_pc |
| 9887 | hsa-mir-20a | USP13      | 0.380464974 | mirna_pc |
| 9888 | hsa-mir-20a | ESF1       | 0.396375309 | mirna_pc |
| 9889 | hsa-mir-20a | ZMYM5      | 0.340897542 | mirna_pc |
| 9890 | hsa-mir-20a | SLC25A33   | 0.310635472 | mirna_pc |
| 9891 | hsa-mir-20a | ZNF26      | 0.315050686 | mirna_pc |
| 9892 | hsa-mir-20a | SMARCC1    | 0.383017907 | mirna_pc |
| 9893 | hsa-mir-20a | CTPS2      | 0.389005981 | mirna_pc |
| 9894 | hsa-mir-20a | GXYLT1     | 0.358755953 | mirna_pc |
| 9895 | hsa-mir-20a | PACRGL     | 0.34738654  | mirna_pc |
| 9896 | hsa-mir-20a | C2orf56    | 0.307804505 | mirna_pc |
| 9897 | hsa-mir-20a | ZNF480     | 0.317167306 | mirna_pc |
| 9898 | hsa-mir-20a | XP04       | 0.546462783 | mirna_pc |
| 9899 | hsa-mir-20a | TSEN2      | 0.302701065 | mirna_pc |
| 9900 | hsa-mir-20a | ZNF232     | 0.301623101 | mirna_pc |
| 9901 | hsa-mir-20a | MDN1       | 0.333738755 | mirna_pc |
| 9902 | hsa-mir-20a | ZBTB39     | 0.339246633 | mirna_pc |
| 9903 | hsa-mir-20a | IFT88      | 0.52118193  | mirna_pc |
| 9904 | hsa-mir-20a | ESD        | 0.320322485 | mirna_pc |
| 9905 | hsa-mir-20a | QRSL1      | 0.34232492  | mirna_pc |
| 9906 | hsa-mir-20a | FANCF      | 0.444831327 | mirna_pc |
| 9907 | hsa-mir-20a | MARS2      | 0.318344719 | mirna_pc |
| 9908 | hsa-mir-20a | VPS54      | 0.333346894 | mirna_pc |
| 9909 | hsa-mir-20a | ZBTB24     | 0.403248806 | mirna_pc |
| 9910 | hsa-mir-20a | ZNF138     | 0.362964609 | mirna_pc |
| 9911 | hsa-mir-20a | ZNF551     | 0.305252082 | mirna_pc |
| 9912 | hsa-mir-20a | CIAO1      | 0.366995039 | mirna_pc |
| 9913 | hsa-mir-20a | C2orf3     | 0.440627131 | mirna_pc |
| 9914 | hsa-mir-20a | POM121C    | 0.310575996 | mirna_pc |
| 9915 | hsa-mir-20a | FAM119A    | 0.417220973 | mirna_pc |
| 9916 | hsa-mir-20a | TIA1       | 0.306382047 | mirna_pc |
| 9917 | hsa-mir-20a | ZNF664     | 0.387052818 | mirna_pc |
| 9918 | hsa-mir-20a | RRP7B      | 0.327260826 | mirna_pc |
| 9919 | hsa-mir-20a | RBBP6      | 0.326960902 | mirna_pc |
| 9920 | hsa-mir-20a | VPS36      | 0.346679621 | mirna_pc |
| 9921 | hsa-mir-20a | GOLT1A     | 0.345268577 | mirna_pc |
| 9922 | hsa-mir-20a | NCRNA00183 | 0.310090272 | mirna_pc |
| 9923 | hsa-mir-20a | UBXN4      | 0.325388087 | mirna_pc |
| 9924 | hsa-mir-20a | SCML2      | 0.353893411 | mirna_pc |
| 9925 | hsa-mir-20a | SIKE1      | 0.313572604 | mirna_pc |
| 9926 | hsa-mir-20a | MRPL19     | 0.481026942 | mirna_pc |
| 9927 | hsa-mir-20a | GCFC1      | 0.339872194 | mirna_pc |
| 9928 | hsa-mir-20a | EFHA1      | 0.339457804 | mirna_pc |
| 9929 | hsa-mir-20a | ABCB10     | 0.354630649 | mirna_pc |
| 9930 | hsa-mir-20a | KPNA3      | 0.372094605 | mirna_pc |
| 9931 | hsa-mir-20a | ZCCHC3     | 0.479334153 | mirna_pc |
| 9932 | hsa-mir-20a | TOMM20     | 0.307023839 | mirna_pc |
| 9933 | hsa-mir-20a | RRP15      | 0.475265774 | mirna_pc |
| 9934 | hsa-mir-20a | LUC7L3     | 0.33530099  | mirna_pc |
| 9935 | hsa-mir-20a | ETV5       | 0.339095133 | mirna_pc |

|                   |          |                      |
|-------------------|----------|----------------------|
| 9936 hsa-mir-20a  | KIAA1430 | 0.307665436 mirna_pc |
| 9937 hsa-mir-20a  | CASC3    | 0.3099052 mirna_pc   |
| 9938 hsa-mir-20a  | AADAT    | 0.42051246 mirna_pc  |
| 9939 hsa-mir-20a  | CBLL1    | 0.310820387 mirna_pc |
| 9940 hsa-mir-20a  | ACP1     | 0.367097635 mirna_pc |
| 9941 hsa-mir-20a  | C2orf43  | 0.376572571 mirna_pc |
| 9942 hsa-mir-20a  | DACH1    | 0.319061295 mirna_pc |
| 9943 hsa-mir-20a  | RARA     | 0.322785508 mirna_pc |
| 9944 hsa-mir-20a  | ACTR3B   | 0.337034874 mirna_pc |
| 9945 hsa-mir-20a  | GTF3A    | 0.45009549 mirna_pc  |
| 9946 hsa-mir-20a  | RBM27    | 0.303623135 mirna_pc |
| 9947 hsa-mir-20a  | ZNF680   | 0.33682613 mirna_pc  |
| 9948 hsa-mir-20a  | TPP2     | 0.482263585 mirna_pc |
| 9949 hsa-mir-20a  | SPRED2   | 0.342719338 mirna_pc |
| 9950 hsa-mir-20a  | CWC22    | 0.344775992 mirna_pc |
| 9951 hsa-mir-20a  | TXLNG    | 0.414014797 mirna_pc |
| 9952 hsa-mir-20a  | TRIM25   | 0.330803434 mirna_pc |
| 9953 hsa-mir-20a  | PRMT6    | 0.322658184 mirna_pc |
| 9954 hsa-mir-20a  | CEP57    | 0.316930847 mirna_pc |
| 9955 hsa-mir-20a  | MRPS9    | 0.359960872 mirna_pc |
| 9956 hsa-mir-20a  | PPP1R1B  | 0.34774783 mirna_pc  |
| 9957 hsa-mir-20a  | MIR17HG  | 0.510376325 mirna_pc |
| 9958 hsa-mir-20a  | PHIP     | 0.304875958 mirna_pc |
| 9959 hsa-mir-20a  | AARSD1   | 0.348555926 mirna_pc |
| 9960 hsa-mir-20a  | PRDX3    | 0.306113609 mirna_pc |
| 9961 hsa-mir-20a  | ZNF239   | 0.352374604 mirna_pc |
| 9962 hsa-mir-20a  | KLHL23   | 0.400071308 mirna_pc |
| 9963 hsa-mir-20a  | ZNF202   | 0.322827323 mirna_pc |
| 9964 hsa-mir-20a  | TMEM14B  | 0.310647601 mirna_pc |
| 9965 hsa-mir-20a  | SMARCA1  | 0.331827173 mirna_pc |
| 9966 hsa-mir-20a  | ZNF77    | 0.35597679 mirna_pc  |
| 9967 hsa-mir-20a  | MRPS31   | 0.398315197 mirna_pc |
| 9968 hsa-mir-20a  | CENPV    | 0.340682315 mirna_pc |
| 9969 hsa-mir-20a  | SFRS6    | 0.335569469 mirna_pc |
| 9970 hsa-mir-20a  | SLC4A5   | 0.35146049 mirna_pc  |
| 9971 hsa-mir-20a  | DNMT3A   | 0.455061716 mirna_pc |
| 9972 hsa-mir-20a  | MIPEP    | 0.415013151 mirna_pc |
| 9973 hsa-mir-20a  | PRTFDC1  | 0.391321616 mirna_pc |
| 9974 hsa-mir-20a  | CARS2    | 0.308066988 mirna_pc |
| 9975 hsa-mir-20a  | PATZ1    | 0.377753304 mirna_pc |
| 9976 hsa-mir-20a  | ZNF670   | 0.381594641 mirna_pc |
| 9977 hsa-mir-20a  | ZNF326   | 0.342132969 mirna_pc |
| 9978 hsa-mir-20a  | ZRANB2   | 0.303984973 mirna_pc |
| 9979 hsa-mir-20a  | ZNF711   | 0.33744122 mirna_pc  |
| 9980 hsa-mir-20a  | POM121   | 0.376476576 mirna_pc |
| 9981 hsa-mir-20a  | CCT6P1   | 0.343163453 mirna_pc |
| 9982 hsa-mir-1301 | TPX2     | 0.323428958 mirna_pc |
| 9983 hsa-mir-1301 | KPNA2    | 0.302063152 mirna_pc |
| 9984 hsa-mir-1301 | RCC2     | 0.322711171 mirna_pc |
| 9985 hsa-mir-1301 | HOXC9    | 0.506197284 mirna_pc |
| 9986 hsa-mir-1301 | ECT2     | 0.340920387 mirna_pc |
| 9987 hsa-mir-1301 | RRM2     | 0.390300887 mirna_pc |
| 9988 hsa-mir-1301 | HOXC8    | 0.301974681 mirna_pc |
| 9989 hsa-mir-1301 | CDC25C   | 0.319833512 mirna_pc |

|                    |          |                      |
|--------------------|----------|----------------------|
| 9990 hsa-mir-1301  | UBE2C    | 0.408843732 mirna_pc |
| 9991 hsa-mir-1301  | NUSAP1   | 0.384547038 mirna_pc |
| 9992 hsa-mir-1301  | KIFC1    | 0.321970324 mirna_pc |
| 9993 hsa-mir-1301  | BUB1B    | 0.433844795 mirna_pc |
| 9994 hsa-mir-1301  | KIF18B   | 0.308133308 mirna_pc |
| 9995 hsa-mir-1301  | KIF2C    | 0.317355169 mirna_pc |
| 9996 hsa-mir-1301  | NCAPG    | 0.319377233 mirna_pc |
| 9997 hsa-mir-1301  | CLSPN    | 0.318104153 mirna_pc |
| 9998 hsa-mir-1301  | SGOL1    | 0.334026932 mirna_pc |
| 9999 hsa-mir-1301  | CCNA2    | 0.35628108 mirna_pc  |
| 10000 hsa-mir-1301 | SPC25    | 0.335973211 mirna_pc |
| 10001 hsa-mir-1301 | FANCI    | 0.357009345 mirna_pc |
| 10002 hsa-mir-1301 | NEK2     | 0.30072393 mirna_pc  |
| 10003 hsa-mir-1301 | MND1     | 0.369491864 mirna_pc |
| 10004 hsa-mir-1301 | KIF22    | 0.309506847 mirna_pc |
| 10005 hsa-mir-1301 | NCAPH    | 0.375148204 mirna_pc |
| 10006 hsa-mir-1301 | RAD54L   | 0.326380501 mirna_pc |
| 10007 hsa-mir-1301 | CENPA    | 0.435894593 mirna_pc |
| 10008 hsa-mir-1301 | MAD2L1   | 0.405230295 mirna_pc |
| 10009 hsa-mir-1301 | TIMELESS | 0.420959862 mirna_pc |
| 10010 hsa-mir-1301 | LMNB1    | 0.342089134 mirna_pc |
| 10011 hsa-mir-1301 | CDCA8    | 0.33024766 mirna_pc  |
| 10012 hsa-mir-1301 | TROAP    | 0.514341763 mirna_pc |
| 10013 hsa-mir-1301 | XPO1     | 0.336310159 mirna_pc |
| 10014 hsa-mir-1301 | CDC45    | 0.307451319 mirna_pc |
| 10015 hsa-mir-1301 | STMN1    | 0.392576286 mirna_pc |
| 10016 hsa-mir-1301 | CENPM    | 0.317618639 mirna_pc |
| 10017 hsa-mir-1301 | TK1      | 0.350422205 mirna_pc |
| 10018 hsa-mir-1301 | DKC1     | 0.347078382 mirna_pc |
| 10019 hsa-mir-1301 | TUBB     | 0.310904981 mirna_pc |
| 10020 hsa-mir-1301 | KIAA0101 | 0.338161153 mirna_pc |
| 10021 hsa-mir-1301 | KIF4A    | 0.331058761 mirna_pc |
| 10022 hsa-mir-1301 | ORC1L    | 0.320963728 mirna_pc |
| 10023 hsa-mir-1301 | KNTC1    | 0.386899212 mirna_pc |
| 10024 hsa-mir-1301 | CCNB2    | 0.352268923 mirna_pc |
| 10025 hsa-mir-1301 | NUF2     | 0.413641603 mirna_pc |
| 10026 hsa-mir-1301 | PLK4     | 0.362807321 mirna_pc |
| 10027 hsa-mir-1301 | FANCB    | 0.322450102 mirna_pc |
| 10028 hsa-mir-1301 | KIF18A   | 0.30534735 mirna_pc  |
| 10029 hsa-mir-1301 | HJURP    | 0.381768733 mirna_pc |
| 10030 hsa-mir-1301 | RAD51    | 0.307016997 mirna_pc |
| 10031 hsa-mir-1301 | BLM      | 0.392215326 mirna_pc |
| 10032 hsa-mir-1301 | NME1     | 0.305866701 mirna_pc |
| 10033 hsa-mir-1301 | CCDC150  | 0.301832763 mirna_pc |
| 10034 hsa-mir-1301 | BIRC5    | 0.500968242 mirna_pc |
| 10035 hsa-mir-1301 | RCC1     | 0.302706814 mirna_pc |
| 10036 hsa-mir-1301 | OIP5     | 0.424237376 mirna_pc |
| 10037 hsa-mir-1301 | EME1     | 0.350603142 mirna_pc |
| 10038 hsa-mir-1301 | RECQL4   | 0.349645331 mirna_pc |
| 10039 hsa-mir-1301 | AURKB    | 0.411469491 mirna_pc |
| 10040 hsa-mir-1301 | MCM10    | 0.338126704 mirna_pc |
| 10041 hsa-mir-1301 | KIF20A   | 0.382108955 mirna_pc |
| 10042 hsa-mir-1301 | SGOL2    | 0.33624558 mirna_pc  |
| 10043 hsa-mir-1301 | CHEK2    | 0.394579134 mirna_pc |

|                    |          |                      |
|--------------------|----------|----------------------|
| 10044 hsa-mir-1301 | KIF15    | 0.356923182 mirna_pc |
| 10045 hsa-mir-1301 | CDCA3    | 0.390993587 mirna_pc |
| 10046 hsa-mir-1301 | Clorf112 | 0.395024482 mirna_pc |
| 10047 hsa-mir-1301 | TRAIP    | 0.345755161 mirna_pc |
| 10048 hsa-mir-1301 | ORC6L    | 0.311393704 mirna_pc |
| 10049 hsa-mir-1301 | C16orf59 | 0.426168463 mirna_pc |
| 10050 hsa-mir-1301 | RAE1     | 0.384968848 mirna_pc |
| 10051 hsa-mir-1301 | FAM72D   | 0.301312206 mirna_pc |
| 10052 hsa-mir-1301 | FAM72B   | 0.337070607 mirna_pc |
| 10053 hsa-mir-1301 | ACTL6A   | 0.480858967 mirna_pc |
| 10054 hsa-mir-1301 | POLD1    | 0.323983157 mirna_pc |
| 10055 hsa-mir-1301 | ZNF229   | 0.443579761 mirna_pc |
| 10056 hsa-mir-1301 | C12orf48 | 0.453700726 mirna_pc |
| 10057 hsa-mir-1301 | HNRNPL   | 0.48512758 mirna_pc  |
| 10058 hsa-mir-1301 | SMC4     | 0.382247251 mirna_pc |
| 10059 hsa-mir-1301 | TTK      | 0.310920112 mirna_pc |
| 10060 hsa-mir-1301 | SF3B4    | 0.363810456 mirna_pc |
| 10061 hsa-mir-1301 | TUBA1B   | 0.323675269 mirna_pc |
| 10062 hsa-mir-1301 | HOXC6    | 0.311641546 mirna_pc |
| 10063 hsa-mir-1301 | HELLS    | 0.316688232 mirna_pc |
| 10064 hsa-mir-1301 | UBE2S    | 0.367549457 mirna_pc |
| 10065 hsa-mir-1301 | NCAPD2   | 0.312906 mirna_pc    |
| 10066 hsa-mir-1301 | C11orf82 | 0.477523901 mirna_pc |
| 10067 hsa-mir-1301 | HNRNPC   | 0.383523917 mirna_pc |
| 10068 hsa-mir-1301 | ILF2     | 0.396125377 mirna_pc |
| 10069 hsa-mir-1301 | TYMS     | 0.314880819 mirna_pc |
| 10070 hsa-mir-1301 | C20orf20 | 0.303615137 mirna_pc |
| 10071 hsa-mir-1301 | RNASEH2A | 0.312691809 mirna_pc |
| 10072 hsa-mir-1301 | EPR1     | 0.379710051 mirna_pc |
| 10073 hsa-mir-1301 | PIF1     | 0.341734171 mirna_pc |
| 10074 hsa-mir-1301 | H2AFX    | 0.302602264 mirna_pc |
| 10075 hsa-mir-1301 | SFRS2    | 0.388039672 mirna_pc |
| 10076 hsa-mir-1301 | UCK2     | 0.388687575 mirna_pc |
| 10077 hsa-mir-1301 | NFKBIL2  | 0.33631653 mirna_pc  |
| 10078 hsa-mir-1301 | C15orf42 | 0.309505793 mirna_pc |
| 10079 hsa-mir-1301 | FAM60A   | 0.304254929 mirna_pc |
| 10080 hsa-mir-1301 | HMGB3    | 0.356707331 mirna_pc |
| 10081 hsa-mir-1301 | E2F1     | 0.330986709 mirna_pc |
| 10082 hsa-mir-1301 | SNRPG    | 0.402555119 mirna_pc |
| 10083 hsa-mir-1301 | EIF4A3   | 0.441139628 mirna_pc |
| 10084 hsa-mir-1301 | SNRPA    | 0.405693272 mirna_pc |
| 10085 hsa-mir-1301 | FUS      | 0.412657825 mirna_pc |
| 10086 hsa-mir-1301 | RFC3     | 0.312155136 mirna_pc |
| 10087 hsa-mir-1301 | CHAF1A   | 0.358295129 mirna_pc |
| 10088 hsa-mir-1301 | GINS4    | 0.465321432 mirna_pc |
| 10089 hsa-mir-1301 | ANP32E   | 0.443518902 mirna_pc |
| 10090 hsa-mir-1301 | CENPO    | 0.423052402 mirna_pc |
| 10091 hsa-mir-1301 | C19orf48 | 0.346498418 mirna_pc |
| 10092 hsa-mir-1301 | GEN1     | 0.354583946 mirna_pc |
| 10093 hsa-mir-1301 | NUDT1    | 0.312441119 mirna_pc |
| 10094 hsa-mir-1301 | HMGB2    | 0.343168014 mirna_pc |
| 10095 hsa-mir-1301 | GINS2    | 0.324804181 mirna_pc |
| 10096 hsa-mir-1301 | DNA2     | 0.3759197 mirna_pc   |
| 10097 hsa-mir-1301 | CSE1L    | 0.332520312 mirna_pc |

|                    |           |                      |
|--------------------|-----------|----------------------|
| 10098 hsa-mir-1301 | PRMT1     | 0.333723503 mirna_pc |
| 10099 hsa-mir-1301 | C18orf56  | 0.300389278 mirna_pc |
| 10100 hsa-mir-1301 | NOP2      | 0.317283876 mirna_pc |
| 10101 hsa-mir-1301 | HIST1H2AE | 0.508524988 mirna_pc |
| 10102 hsa-mir-1301 | CAD       | 0.336960685 mirna_pc |
| 10103 hsa-mir-1301 | CCDC99    | 0.300758414 mirna_pc |
| 10104 hsa-mir-1301 | CDK2      | 0.389818154 mirna_pc |
| 10105 hsa-mir-1301 | CDK4      | 0.426252687 mirna_pc |
| 10106 hsa-mir-1301 | PFDN2     | 0.380611711 mirna_pc |
| 10107 hsa-mir-1301 | BCL2L12   | 0.315841627 mirna_pc |
| 10108 hsa-mir-1301 | CHTF18    | 0.340356486 mirna_pc |
| 10109 hsa-mir-1301 | HNRNPR    | 0.357207836 mirna_pc |
| 10110 hsa-mir-1301 | DLEU2     | 0.391960833 mirna_pc |
| 10111 hsa-mir-1301 | PRIM1     | 0.384714706 mirna_pc |
| 10112 hsa-mir-1301 | KAT2A     | 0.320166651 mirna_pc |
| 10113 hsa-mir-1301 | PSMC4     | 0.4291599 mirna_pc   |
| 10114 hsa-mir-1301 | CHAF1B    | 0.392018106 mirna_pc |
| 10115 hsa-mir-1301 | DHX34     | 0.318889094 mirna_pc |
| 10116 hsa-mir-1301 | HOXC10    | 0.313696725 mirna_pc |
| 10117 hsa-mir-1301 | MSH2      | 0.481597786 mirna_pc |
| 10118 hsa-mir-1301 | SALL4     | 0.365614385 mirna_pc |
| 10119 hsa-mir-1301 | NOP58     | 0.315337049 mirna_pc |
| 10120 hsa-mir-1301 | DBF4      | 0.459241988 mirna_pc |
| 10121 hsa-mir-1301 | CDC7      | 0.450547899 mirna_pc |
| 10122 hsa-mir-1301 | SSB       | 0.347495922 mirna_pc |
| 10123 hsa-mir-1301 | YDJC      | 0.3487213 mirna_pc   |
| 10124 hsa-mir-1301 | SNRPC     | 0.318322441 mirna_pc |
| 10125 hsa-mir-1301 | PSMB4     | 0.383632554 mirna_pc |
| 10126 hsa-mir-1301 | RFC4      | 0.441273091 mirna_pc |
| 10127 hsa-mir-1301 | FBX05     | 0.36192776 mirna_pc  |
| 10128 hsa-mir-1301 | FIGNL1    | 0.492431349 mirna_pc |
| 10129 hsa-mir-1301 | E2F3      | 0.425528612 mirna_pc |
| 10130 hsa-mir-1301 | SF3B14    | 0.383895965 mirna_pc |
| 10131 hsa-mir-1301 | CDC25A    | 0.410304616 mirna_pc |
| 10132 hsa-mir-1301 | RAD54B    | 0.362062548 mirna_pc |
| 10133 hsa-mir-1301 | MAGOH     | 0.33724857 mirna_pc  |
| 10134 hsa-mir-1301 | DDX12     | 0.392629064 mirna_pc |
| 10135 hsa-mir-1301 | NUP37     | 0.307972721 mirna_pc |
| 10136 hsa-mir-1301 | CPSF3     | 0.546329247 mirna_pc |
| 10137 hsa-mir-1301 | BANF1     | 0.370833883 mirna_pc |
| 10138 hsa-mir-1301 | C21orf45  | 0.526566532 mirna_pc |
| 10139 hsa-mir-1301 | ATIC      | 0.320722169 mirna_pc |
| 10140 hsa-mir-1301 | PPM1G     | 0.416661024 mirna_pc |
| 10141 hsa-mir-1301 | DNAJB11   | 0.411420048 mirna_pc |
| 10142 hsa-mir-1301 | SNRPD2    | 0.302155275 mirna_pc |
| 10143 hsa-mir-1301 | ACAD8     | 0.381129549 mirna_pc |
| 10144 hsa-mir-1301 | NUDT5     | 0.348327672 mirna_pc |
| 10145 hsa-mir-1301 | WBP1      | 0.354853939 mirna_pc |
| 10146 hsa-mir-1301 | CBX8      | 0.498585141 mirna_pc |
| 10147 hsa-mir-1301 | TMEM201   | 0.400964075 mirna_pc |
| 10148 hsa-mir-1301 | PFDN4     | 0.340281311 mirna_pc |
| 10149 hsa-mir-1301 | PAFAH1B3  | 0.473284863 mirna_pc |
| 10150 hsa-mir-1301 | CACYBP    | 0.316941332 mirna_pc |
| 10151 hsa-mir-1301 | SASS6     | 0.309676479 mirna_pc |



|                    |              |                      |
|--------------------|--------------|----------------------|
| 10152 hsa-mir-1301 | PSRC1        | 0.384842043 mirna_pc |
| 10153 hsa-mir-1301 | DGUOK        | 0.459984002 mirna_pc |
| 10154 hsa-mir-1301 | MRPL47       | 0.413280325 mirna_pc |
| 10155 hsa-mir-1301 | POU2F1       | 0.307477545 mirna_pc |
| 10156 hsa-mir-1301 | FBL          | 0.36144503 mirna_pc  |
| 10157 hsa-mir-1301 | DONSON       | 0.394753973 mirna_pc |
| 10158 hsa-mir-1301 | HIST1H1E     | 0.336860808 mirna_pc |
| 10159 hsa-mir-1301 | EXOSC5       | 0.39362699 mirna_pc  |
| 10160 hsa-mir-1301 | HNRNPM       | 0.413628131 mirna_pc |
| 10161 hsa-mir-1301 | PNPT1        | 0.35779914 mirna_pc  |
| 10162 hsa-mir-1301 | TMPO         | 0.313031208 mirna_pc |
| 10163 hsa-mir-1301 | CCT6A        | 0.370992817 mirna_pc |
| 10164 hsa-mir-1301 | POLR2H       | 0.391396903 mirna_pc |
| 10165 hsa-mir-1301 | SHFM1        | 0.465107493 mirna_pc |
| 10166 hsa-mir-1301 | GPR19        | 0.340177101 mirna_pc |
| 10167 hsa-mir-1301 | LSG1         | 0.414005138 mirna_pc |
| 10168 hsa-mir-1301 | PPIH         | 0.337129697 mirna_pc |
| 10169 hsa-mir-1301 | DHX9         | 0.363103881 mirna_pc |
| 10170 hsa-mir-1301 | CCDC138      | 0.340290774 mirna_pc |
| 10171 hsa-mir-1301 | LOC100128191 | 0.496867597 mirna_pc |
| 10172 hsa-mir-1301 | SMYD5        | 0.459376803 mirna_pc |
| 10173 hsa-mir-1301 | SF3A2        | 0.351121822 mirna_pc |
| 10174 hsa-mir-1301 | TSSC1        | 0.387355618 mirna_pc |
| 10175 hsa-mir-1301 | TLCD1        | 0.325199987 mirna_pc |
| 10176 hsa-mir-1301 | SNRPF        | 0.397580324 mirna_pc |
| 10177 hsa-mir-1301 | SUMO2        | 0.456266786 mirna_pc |
| 10178 hsa-mir-1301 | SFRS1        | 0.326310523 mirna_pc |
| 10179 hsa-mir-1301 | WDR43        | 0.327712126 mirna_pc |
| 10180 hsa-mir-1301 | SNRPA1       | 0.477409599 mirna_pc |
| 10181 hsa-mir-1301 | SKP2         | 0.303778996 mirna_pc |
| 10182 hsa-mir-1301 | SMC6         | 0.360686046 mirna_pc |
| 10183 hsa-mir-1301 | TIPIN        | 0.409547188 mirna_pc |
| 10184 hsa-mir-1301 | SMARCD1      | 0.344770782 mirna_pc |
| 10185 hsa-mir-1301 | HSPBP1       | 0.383565276 mirna_pc |
| 10186 hsa-mir-1301 | DNMT3B       | 0.321608674 mirna_pc |
| 10187 hsa-mir-1301 | ECE2         | 0.392688351 mirna_pc |
| 10188 hsa-mir-1301 | GPN1         | 0.340675964 mirna_pc |
| 10189 hsa-mir-1301 | RFC5         | 0.349344415 mirna_pc |
| 10190 hsa-mir-1301 | TIGD1        | 0.368351976 mirna_pc |
| 10191 hsa-mir-1301 | POLR2D       | 0.331030663 mirna_pc |
| 10192 hsa-mir-1301 | FTSJ2        | 0.333575432 mirna_pc |
| 10193 hsa-mir-1301 | PA2G4        | 0.355736278 mirna_pc |
| 10194 hsa-mir-1301 | SNRPD3       | 0.42701408 mirna_pc  |
| 10195 hsa-mir-1301 | KHDRBS1      | 0.413146241 mirna_pc |
| 10196 hsa-mir-1301 | SLC5A6       | 0.357388081 mirna_pc |
| 10197 hsa-mir-1301 | SPAST        | 0.424138318 mirna_pc |
| 10198 hsa-mir-1301 | LOC92659     | 0.376141546 mirna_pc |
| 10199 hsa-mir-1301 | CCDC18       | 0.352434534 mirna_pc |
| 10200 hsa-mir-1301 | CCT7         | 0.300464399 mirna_pc |
| 10201 hsa-mir-1301 | PRRT1        | 0.341614325 mirna_pc |
| 10202 hsa-mir-1301 | TMEM194A     | 0.42542431 mirna_pc  |
| 10203 hsa-mir-1301 | SUV420H2     | 0.326322586 mirna_pc |
| 10204 hsa-mir-1301 | ZNF695       | 0.362447918 mirna_pc |
| 10205 hsa-mir-1301 | METTL1       | 0.385992894 mirna_pc |

|                    |           |                      |
|--------------------|-----------|----------------------|
| 10206 hsa-mir-1301 | TMEM69    | 0.318634176 mirna_pc |
| 10207 hsa-mir-1301 | GNL2      | 0.415479878 mirna_pc |
| 10208 hsa-mir-1301 | NASP      | 0.406107705 mirna_pc |
| 10209 hsa-mir-1301 | RPP40     | 0.381997975 mirna_pc |
| 10210 hsa-mir-1301 | NONO      | 0.322603516 mirna_pc |
| 10211 hsa-mir-1301 | CBX4      | 0.306519424 mirna_pc |
| 10212 hsa-mir-1301 | OBFC2B    | 0.348806876 mirna_pc |
| 10213 hsa-mir-1301 | PTMA      | 0.40416003 mirna_pc  |
| 10214 hsa-mir-1301 | USP39     | 0.355580565 mirna_pc |
| 10215 hsa-mir-1301 | DENR      | 0.364449093 mirna_pc |
| 10216 hsa-mir-1301 | SCARB1    | 0.342892647 mirna_pc |
| 10217 hsa-mir-1301 | C11orf84  | 0.328939946 mirna_pc |
| 10218 hsa-mir-1301 | TBCE      | 0.330931895 mirna_pc |
| 10219 hsa-mir-1301 | HIST1H2BK | 0.314890396 mirna_pc |
| 10220 hsa-mir-1301 | CLCN2     | 0.323273599 mirna_pc |
| 10221 hsa-mir-1301 | LRRC8D    | 0.336372761 mirna_pc |
| 10222 hsa-mir-1301 | NCBP2     | 0.396735833 mirna_pc |
| 10223 hsa-mir-1301 | FBX0220S  | 0.344809575 mirna_pc |
| 10224 hsa-mir-1301 | SUV39H2   | 0.368107481 mirna_pc |
| 10225 hsa-mir-1301 | ALG6      | 0.305148984 mirna_pc |
| 10226 hsa-mir-1301 | FANCL     | 0.325659051 mirna_pc |
| 10227 hsa-mir-1301 | NAALADL2  | 0.421052445 mirna_pc |
| 10228 hsa-mir-1301 | HNRNPD    | 0.432046237 mirna_pc |
| 10229 hsa-mir-1301 | DPY30     | 0.450659041 mirna_pc |
| 10230 hsa-mir-1301 | MTHFD2    | 0.357436589 mirna_pc |
| 10231 hsa-mir-1301 | SFRS3     | 0.335165138 mirna_pc |
| 10232 hsa-mir-1301 | PNO1      | 0.38418261 mirna_pc  |
| 10233 hsa-mir-1301 | CCT4      | 0.356412473 mirna_pc |
| 10234 hsa-mir-1301 | RAD9A     | 0.339715662 mirna_pc |
| 10235 hsa-mir-1301 | ELAVL1    | 0.343936231 mirna_pc |
| 10236 hsa-mir-1301 | CCDC121   | 0.458822191 mirna_pc |
| 10237 hsa-mir-1301 | NCAPD3    | 0.475778472 mirna_pc |
| 10238 hsa-mir-1301 | HSP90B1   | 0.315640554 mirna_pc |
| 10239 hsa-mir-1301 | TBC1D7    | 0.455575101 mirna_pc |
| 10240 hsa-mir-1301 | PAK1IP1   | 0.431723785 mirna_pc |
| 10241 hsa-mir-1301 | RPAP3     | 0.35583471 mirna_pc  |
| 10242 hsa-mir-1301 | PFDN6     | 0.353575447 mirna_pc |
| 10243 hsa-mir-1301 | ATP13A3   | 0.346356477 mirna_pc |
| 10244 hsa-mir-1301 | YWHAE     | 0.339378108 mirna_pc |
| 10245 hsa-mir-1301 | HSD17B12  | 0.326779404 mirna_pc |
| 10246 hsa-mir-1301 | C3orf57   | 0.402869289 mirna_pc |
| 10247 hsa-mir-1301 | PDCL3     | 0.331319078 mirna_pc |
| 10248 hsa-mir-1301 | EHMT2     | 0.427383541 mirna_pc |
| 10249 hsa-mir-1301 | UBAP2L    | 0.31062488 mirna_pc  |
| 10250 hsa-mir-1301 | DEK       | 0.369459856 mirna_pc |
| 10251 hsa-mir-1301 | HIST2H4A  | 0.334005977 mirna_pc |
| 10252 hsa-mir-1301 | PASK      | 0.407824011 mirna_pc |
| 10253 hsa-mir-1301 | SAAL1     | 0.332423227 mirna_pc |
| 10254 hsa-mir-1301 | TAF4      | 0.302340189 mirna_pc |
| 10255 hsa-mir-1301 | KHSRP     | 0.395213921 mirna_pc |
| 10256 hsa-mir-1301 | PRAME     | 0.550849921 mirna_pc |
| 10257 hsa-mir-1301 | MRPS17    | 0.414648081 mirna_pc |
| 10258 hsa-mir-1301 | MSL3L2    | 0.303322341 mirna_pc |
| 10259 hsa-mir-1301 | SUV39H1   | 0.332016358 mirna_pc |

|                    |          |                      |
|--------------------|----------|----------------------|
| 10260 hsa-mir-1301 | IP09     | 0.30479337 mirna_pc  |
| 10261 hsa-mir-1301 | PSMD4    | 0.310760936 mirna_pc |
| 10262 hsa-mir-1301 | SART3    | 0.359741832 mirna_pc |
| 10263 hsa-mir-1301 | TRA2B    | 0.381471295 mirna_pc |
| 10264 hsa-mir-1301 | RSRC1    | 0.41670188 mirna_pc  |
| 10265 hsa-mir-1301 | GAR1     | 0.312791947 mirna_pc |
| 10266 hsa-mir-1301 | C15orf23 | 0.421497094 mirna_pc |
| 10267 hsa-mir-1301 | ANAPC7   | 0.308059121 mirna_pc |
| 10268 hsa-mir-1301 | PRMT3    | 0.321840312 mirna_pc |
| 10269 hsa-mir-1301 | RBM12B   | 0.31148491 mirna_pc  |
| 10270 hsa-mir-1301 | C3orf21  | 0.308820517 mirna_pc |
| 10271 hsa-mir-1301 | PSMD12   | 0.363992369 mirna_pc |
| 10272 hsa-mir-1301 | ZNF879   | 0.316864002 mirna_pc |
| 10273 hsa-mir-1301 | LSM14B   | 0.314323828 mirna_pc |
| 10274 hsa-mir-1301 | DIABLO   | 0.301191308 mirna_pc |
| 10275 hsa-mir-1301 | TDG      | 0.311957484 mirna_pc |
| 10276 hsa-mir-1301 | ITGB3BP  | 0.331340108 mirna_pc |
| 10277 hsa-mir-1301 | ENOPH1   | 0.42788039 mirna_pc  |
| 10278 hsa-mir-1301 | PABPC1L  | 0.382333733 mirna_pc |
| 10279 hsa-mir-1301 | C19orf47 | 0.385087899 mirna_pc |
| 10280 hsa-mir-1301 | DDX55    | 0.390950385 mirna_pc |
| 10281 hsa-mir-1301 | C17orf96 | 0.409813725 mirna_pc |
| 10282 hsa-mir-1301 | PLEKHG4  | 0.379798322 mirna_pc |
| 10283 hsa-mir-1301 | SFPQ     | 0.382313433 mirna_pc |
| 10284 hsa-mir-1301 | AP3M2    | 0.375227644 mirna_pc |
| 10285 hsa-mir-1301 | CNOT3    | 0.347565506 mirna_pc |
| 10286 hsa-mir-1301 | VPS72    | 0.408098106 mirna_pc |
| 10287 hsa-mir-1301 | EIF4EBP1 | 0.4789796 mirna_pc   |
| 10288 hsa-mir-1301 | TTC17    | 0.402602826 mirna_pc |
| 10289 hsa-mir-1301 | RHBDD3   | 0.344344593 mirna_pc |
| 10290 hsa-mir-1301 | CADM1    | 0.622638337 mirna_pc |
| 10291 hsa-mir-1301 | POLA1    | 0.307840741 mirna_pc |
| 10292 hsa-mir-1301 | HDAC2    | 0.425171827 mirna_pc |
| 10293 hsa-mir-1301 | GMNN     | 0.357171193 mirna_pc |
| 10294 hsa-mir-1301 | PDCD2L   | 0.338996782 mirna_pc |
| 10295 hsa-mir-1301 | PA2G4P4  | 0.346183164 mirna_pc |
| 10296 hsa-mir-1301 | WDR53    | 0.323674069 mirna_pc |
| 10297 hsa-mir-1301 | ALOX12P2 | 0.329776503 mirna_pc |
| 10298 hsa-mir-1301 | ANKRD32  | 0.30433234 mirna_pc  |
| 10299 hsa-mir-1301 | PDAP1    | 0.585908013 mirna_pc |
| 10300 hsa-mir-1301 | RNF7     | 0.413540899 mirna_pc |
| 10301 hsa-mir-1301 | GEMIN6   | 0.477161339 mirna_pc |
| 10302 hsa-mir-1301 | FAM86C   | 0.301168227 mirna_pc |
| 10303 hsa-mir-1301 | PTCD1    | 0.602037354 mirna_pc |
| 10304 hsa-mir-1301 | CRIP1    | 0.440286931 mirna_pc |
| 10305 hsa-mir-1301 | MSH6     | 0.469593112 mirna_pc |
| 10306 hsa-mir-1301 | SOX4     | 0.379491504 mirna_pc |
| 10307 hsa-mir-1301 | C3orf34  | 0.431306455 mirna_pc |
| 10308 hsa-mir-1301 | TPRKB    | 0.47937927 mirna_pc  |
| 10309 hsa-mir-1301 | LEF1     | 0.309059194 mirna_pc |
| 10310 hsa-mir-1301 | RNF115   | 0.343982066 mirna_pc |
| 10311 hsa-mir-1301 | POLB     | 0.46819473 mirna_pc  |
| 10312 hsa-mir-1301 | ACBD6    | 0.336682027 mirna_pc |
| 10313 hsa-mir-1301 | HNRNPA1  | 0.322388061 mirna_pc |

|                    |           |                      |
|--------------------|-----------|----------------------|
| 10314 hsa-mir-1301 | UBA2      | 0.344465362 mirna_pc |
| 10315 hsa-mir-1301 | CDK2AP1   | 0.355528173 mirna_pc |
| 10316 hsa-mir-1301 | NUDT3     | 0.528606927 mirna_pc |
| 10317 hsa-mir-1301 | EIF2B4    | 0.327785015 mirna_pc |
| 10318 hsa-mir-1301 | MEX3A     | 0.419268227 mirna_pc |
| 10319 hsa-mir-1301 | MOGS      | 0.380896044 mirna_pc |
| 10320 hsa-mir-1301 | ATP5J2    | 0.560176662 mirna_pc |
| 10321 hsa-mir-1301 | BAT1      | 0.336682635 mirna_pc |
| 10322 hsa-mir-1301 | COIL      | 0.354667939 mirna_pc |
| 10323 hsa-mir-1301 | RFC2      | 0.30175794 mirna_pc  |
| 10324 hsa-mir-1301 | BUD31     | 0.519107428 mirna_pc |
| 10325 hsa-mir-1301 | HIST1H4H  | 0.335730328 mirna_pc |
| 10326 hsa-mir-1301 | C16orf88  | 0.465994994 mirna_pc |
| 10327 hsa-mir-1301 | HNRNPA1L2 | 0.37661212 mirna_pc  |
| 10328 hsa-mir-1301 | CBX1      | 0.308209159 mirna_pc |
| 10329 hsa-mir-1301 | EMILIN3   | 0.371256758 mirna_pc |
| 10330 hsa-mir-1301 | HMGB1     | 0.32542607 mirna_pc  |
| 10331 hsa-mir-1301 | ZBTB12    | 0.41158497 mirna_pc  |
| 10332 hsa-mir-1301 | LOC642846 | 0.358943922 mirna_pc |
| 10333 hsa-mir-1301 | TGIF2     | 0.311643175 mirna_pc |
| 10334 hsa-mir-1301 | ZNF155    | 0.320338764 mirna_pc |
| 10335 hsa-mir-1301 | RCN2      | 0.407625519 mirna_pc |
| 10336 hsa-mir-1301 | THUMPD2   | 0.457692573 mirna_pc |
| 10337 hsa-mir-1301 | MTF2      | 0.338719867 mirna_pc |
| 10338 hsa-mir-1301 | GYLTL1B   | 0.337096177 mirna_pc |
| 10339 hsa-mir-1301 | TARBP2    | 0.32727771 mirna_pc  |
| 10340 hsa-mir-1301 | CCDC142   | 0.458682843 mirna_pc |
| 10341 hsa-mir-1301 | SNHG9     | 0.300173319 mirna_pc |
| 10342 hsa-mir-1301 | POU6F2    | 0.368193612 mirna_pc |
| 10343 hsa-mir-1301 | ZNF256    | 0.310576987 mirna_pc |
| 10344 hsa-mir-1301 | NOL10     | 0.477208836 mirna_pc |
| 10345 hsa-mir-1301 | SF3A3     | 0.343326606 mirna_pc |
| 10346 hsa-mir-1301 | CTU1      | 0.317892892 mirna_pc |
| 10347 hsa-mir-1301 | POLE      | 0.393596284 mirna_pc |
| 10348 hsa-mir-1301 | EPHA7     | 0.314091064 mirna_pc |
| 10349 hsa-mir-1301 | ZKSCAN2   | 0.325205065 mirna_pc |
| 10350 hsa-mir-1301 | MUTYH     | 0.366878477 mirna_pc |
| 10351 hsa-mir-1301 | WRNIP1    | 0.324448223 mirna_pc |
| 10352 hsa-mir-1301 | SNHG10    | 0.338882392 mirna_pc |
| 10353 hsa-mir-1301 | TAF1B     | 0.512984795 mirna_pc |
| 10354 hsa-mir-1301 | TIMM50    | 0.434119005 mirna_pc |
| 10355 hsa-mir-1301 | XRCC6BP1  | 0.447965206 mirna_pc |
| 10356 hsa-mir-1301 | ADSL      | 0.357113751 mirna_pc |
| 10357 hsa-mir-1301 | VRK1      | 0.309666297 mirna_pc |
| 10358 hsa-mir-1301 | DDOST     | 0.316182495 mirna_pc |
| 10359 hsa-mir-1301 | EXOSC9    | 0.387558087 mirna_pc |
| 10360 hsa-mir-1301 | FOXRED2   | 0.324485675 mirna_pc |
| 10361 hsa-mir-1301 | UNG       | 0.381649322 mirna_pc |
| 10362 hsa-mir-1301 | RBMX      | 0.452101391 mirna_pc |
| 10363 hsa-mir-1301 | TMCO6     | 0.312844931 mirna_pc |
| 10364 hsa-mir-1301 | TSEN15    | 0.375623071 mirna_pc |
| 10365 hsa-mir-1301 | CDK16     | 0.300494886 mirna_pc |
| 10366 hsa-mir-1301 | ALKBH2    | 0.405849575 mirna_pc |
| 10367 hsa-mir-1301 | BAMBI     | 0.305700159 mirna_pc |

|                    |           |                      |
|--------------------|-----------|----------------------|
| 10368 hsa-mir-1301 | POP5      | 0.383960659 mirna_pc |
| 10369 hsa-mir-1301 | CCDC90A   | 0.347568654 mirna_pc |
| 10370 hsa-mir-1301 | XRCC5     | 0.301339048 mirna_pc |
| 10371 hsa-mir-1301 | RPF2      | 0.328903062 mirna_pc |
| 10372 hsa-mir-1301 | CLK2      | 0.341997122 mirna_pc |
| 10373 hsa-mir-1301 | NHLRC1    | 0.427423597 mirna_pc |
| 10374 hsa-mir-1301 | EFR3B     | 0.301576945 mirna_pc |
| 10375 hsa-mir-1301 | CCDC24    | 0.397097294 mirna_pc |
| 10376 hsa-mir-1301 | PDIA6     | 0.37260169 mirna_pc  |
| 10377 hsa-mir-1301 | GPN3      | 0.393395804 mirna_pc |
| 10378 hsa-mir-1301 | ASB3      | 0.316037087 mirna_pc |
| 10379 hsa-mir-1301 | LOC152217 | 0.336011517 mirna_pc |
| 10380 hsa-mir-1301 | MEMO1     | 0.497033177 mirna_pc |
| 10381 hsa-mir-1301 | IGSF9     | 0.303000995 mirna_pc |
| 10382 hsa-mir-1301 | LOC440905 | 0.374609682 mirna_pc |
| 10383 hsa-mir-1301 | MYLIP     | 0.315382534 mirna_pc |
| 10384 hsa-mir-1301 | UBXN2A    | 0.410199921 mirna_pc |
| 10385 hsa-mir-1301 | DNAJC14   | 0.394142264 mirna_pc |
| 10386 hsa-mir-1301 | KDM2B     | 0.365638676 mirna_pc |
| 10387 hsa-mir-1301 | GTF3C2    | 0.307998532 mirna_pc |
| 10388 hsa-mir-1301 | C19orf73  | 0.325491694 mirna_pc |
| 10389 hsa-mir-1301 | MAGEF1    | 0.492593157 mirna_pc |
| 10390 hsa-mir-1301 | PCGF6     | 0.32081739 mirna_pc  |
| 10391 hsa-mir-1301 | FAM136A   | 0.349320045 mirna_pc |
| 10392 hsa-mir-1301 | APOA1BP   | 0.300101148 mirna_pc |
| 10393 hsa-mir-1301 | C7orf25   | 0.304620089 mirna_pc |
| 10394 hsa-mir-1301 | HMGN1     | 0.311941953 mirna_pc |
| 10395 hsa-mir-1301 | SMARCB1   | 0.313120023 mirna_pc |
| 10396 hsa-mir-1301 | TTC32     | 0.557793171 mirna_pc |
| 10397 hsa-mir-1301 | SMN2      | 0.393908481 mirna_pc |
| 10398 hsa-mir-1301 | U2AF1     | 0.456131049 mirna_pc |
| 10399 hsa-mir-1301 | FAM92A1   | 0.322888745 mirna_pc |
| 10400 hsa-mir-1301 | ZNF639    | 0.38182902 mirna_pc  |
| 10401 hsa-mir-1301 | ITPRIPL1  | 0.365366006 mirna_pc |
| 10402 hsa-mir-1301 | MSTO1     | 0.362535365 mirna_pc |
| 10403 hsa-mir-1301 | RBM17     | 0.323717743 mirna_pc |
| 10404 hsa-mir-1301 | ABT1      | 0.460011388 mirna_pc |
| 10405 hsa-mir-1301 | THADA     | 0.338722221 mirna_pc |
| 10406 hsa-mir-1301 | MPHOSPH10 | 0.377799733 mirna_pc |
| 10407 hsa-mir-1301 | AKAP9     | 0.512662203 mirna_pc |
| 10408 hsa-mir-1301 | RPS7      | 0.325659098 mirna_pc |
| 10409 hsa-mir-1301 | ATXN7L2   | 0.359015068 mirna_pc |
| 10410 hsa-mir-1301 | MKRN3     | 0.37837525 mirna_pc  |
| 10411 hsa-mir-1301 | PABPN1    | 0.34100291 mirna_pc  |
| 10412 hsa-mir-1301 | METAP2    | 0.36581558 mirna_pc  |
| 10413 hsa-mir-1301 | BCL7A     | 0.386634333 mirna_pc |
| 10414 hsa-mir-1301 | RNFT2     | 0.338920963 mirna_pc |
| 10415 hsa-mir-1301 | C7orf44   | 0.428081792 mirna_pc |
| 10416 hsa-mir-1301 | NUDCD2    | 0.327016723 mirna_pc |
| 10417 hsa-mir-1301 | NAT9      | 0.414457381 mirna_pc |
| 10418 hsa-mir-1301 | WDR77     | 0.373166139 mirna_pc |
| 10419 hsa-mir-1301 | MRPL21    | 0.350656862 mirna_pc |
| 10420 hsa-mir-1301 | NLE1      | 0.302607327 mirna_pc |
| 10421 hsa-mir-1301 | FXR1      | 0.305935997 mirna_pc |

|       |              |           |             |          |
|-------|--------------|-----------|-------------|----------|
| 10422 | hsa-mir-1301 | DMRTA2    | 0.334389047 | mirna_pc |
| 10423 | hsa-mir-1301 | UPF3B     | 0.346010778 | mirna_pc |
| 10424 | hsa-mir-1301 | BTG3      | 0.327775943 | mirna_pc |
| 10425 | hsa-mir-1301 | LOC645332 | 0.439830767 | mirna_pc |
| 10426 | hsa-mir-1301 | PRR3      | 0.346806708 | mirna_pc |
| 10427 | hsa-mir-1301 | POLR3C    | 0.324468109 | mirna_pc |
| 10428 | hsa-mir-1301 | MGC72080  | 0.557322873 | mirna_pc |
| 10429 | hsa-mir-1301 | TRRAP     | 0.42962027  | mirna_pc |
| 10430 | hsa-mir-1301 | TRMT61B   | 0.423007001 | mirna_pc |
| 10431 | hsa-mir-1301 | RWDD3     | 0.382818188 | mirna_pc |
| 10432 | hsa-mir-1301 | SEMA4F    | 0.307286754 | mirna_pc |
| 10433 | hsa-mir-1301 | ZNF193    | 0.317863966 | mirna_pc |
| 10434 | hsa-mir-1301 | TBX3      | 0.318184453 | mirna_pc |
| 10435 | hsa-mir-1301 | APITD1    | 0.30078917  | mirna_pc |
| 10436 | hsa-mir-1301 | RDH14     | 0.36146825  | mirna_pc |
| 10437 | hsa-mir-1301 | SLC25A13  | 0.334606123 | mirna_pc |
| 10438 | hsa-mir-1301 | MPV17     | 0.369072463 | mirna_pc |
| 10439 | hsa-mir-1301 | DDX20     | 0.451322378 | mirna_pc |
| 10440 | hsa-mir-1301 | DCUN1D1   | 0.318633261 | mirna_pc |
| 10441 | hsa-mir-1301 | C1orf109  | 0.334103241 | mirna_pc |
| 10442 | hsa-mir-1301 | PCBP1     | 0.323023124 | mirna_pc |
| 10443 | hsa-mir-1301 | CHCHD2    | 0.374308775 | mirna_pc |
| 10444 | hsa-mir-1301 | PIGX      | 0.406272169 | mirna_pc |
| 10445 | hsa-mir-1301 | HTRA2     | 0.380976729 | mirna_pc |
| 10446 | hsa-mir-1301 | MTA3      | 0.400032508 | mirna_pc |
| 10447 | hsa-mir-1301 | CHAC2     | 0.346763932 | mirna_pc |
| 10448 | hsa-mir-1301 | ACN9      | 0.471673043 | mirna_pc |
| 10449 | hsa-mir-1301 | SEC61A2   | 0.347811991 | mirna_pc |
| 10450 | hsa-mir-1301 | PSPC1     | 0.354173236 | mirna_pc |
| 10451 | hsa-mir-1301 | INTU      | 0.498449602 | mirna_pc |
| 10452 | hsa-mir-1301 | ATP6V1E2  | 0.331250448 | mirna_pc |
| 10453 | hsa-mir-1301 | GPR3      | 0.334012481 | mirna_pc |
| 10454 | hsa-mir-1301 | E2F6      | 0.511675051 | mirna_pc |
| 10455 | hsa-mir-1301 | DRG1      | 0.338451384 | mirna_pc |
| 10456 | hsa-mir-1301 | NOL7      | 0.417110192 | mirna_pc |
| 10457 | hsa-mir-1301 | PCDHB5    | 0.380049347 | mirna_pc |
| 10458 | hsa-mir-1301 | PRPSAP2   | 0.33292399  | mirna_pc |
| 10459 | hsa-mir-1301 | CPSF4     | 0.607699619 | mirna_pc |
| 10460 | hsa-mir-1301 | HUNK      | 0.314954832 | mirna_pc |
| 10461 | hsa-mir-1301 | ACTR6     | 0.361209129 | mirna_pc |
| 10462 | hsa-mir-1301 | PCGF2     | 0.340103947 | mirna_pc |
| 10463 | hsa-mir-1301 | SFRS13A   | 0.345300915 | mirna_pc |
| 10464 | hsa-mir-1301 | COQ10A    | 0.305325791 | mirna_pc |
| 10465 | hsa-mir-1301 | SCLY      | 0.359793661 | mirna_pc |
| 10466 | hsa-mir-1301 | NT5C      | 0.312563105 | mirna_pc |
| 10467 | hsa-mir-1301 | FIZ1      | 0.342187154 | mirna_pc |
| 10468 | hsa-mir-1301 | CCDC59    | 0.318147841 | mirna_pc |
| 10469 | hsa-mir-1301 | SLC4A1AP  | 0.400243295 | mirna_pc |
| 10470 | hsa-mir-1301 | TTC27     | 0.442325053 | mirna_pc |
| 10471 | hsa-mir-1301 | DHRS13    | 0.380524814 | mirna_pc |
| 10472 | hsa-mir-1301 | MCCC1     | 0.32708691  | mirna_pc |
| 10473 | hsa-mir-1301 | MTIF2     | 0.382726408 | mirna_pc |
| 10474 | hsa-mir-1301 | EWSR1     | 0.302518416 | mirna_pc |
| 10475 | hsa-mir-1301 | LOC222699 | 0.576474326 | mirna_pc |

|                    |              |                      |
|--------------------|--------------|----------------------|
| 10476 hsa-mir-1301 | KCNMB3       | 0.437644803 mirna_pc |
| 10477 hsa-mir-1301 | KRR1         | 0.305390263 mirna_pc |
| 10478 hsa-mir-1301 | DHX57        | 0.44859875 mirna_pc  |
| 10479 hsa-mir-1301 | HIST1H1C     | 0.521629289 mirna_pc |
| 10480 hsa-mir-1301 | AAAS         | 0.46674467 mirna_pc  |
| 10481 hsa-mir-1301 | SFRS8        | 0.314787382 mirna_pc |
| 10482 hsa-mir-1301 | CHST14       | 0.341284856 mirna_pc |
| 10483 hsa-mir-1301 | ACVR2B       | 0.406223791 mirna_pc |
| 10484 hsa-mir-1301 | C19orf54     | 0.39913121 mirna_pc  |
| 10485 hsa-mir-1301 | DKK 1.00     | 0.344275292 mirna_pc |
| 10486 hsa-mir-1301 | SUPT7L       | 0.466225319 mirna_pc |
| 10487 hsa-mir-1301 | SMUG1        | 0.41667034 mirna_pc  |
| 10488 hsa-mir-1301 | LIG3         | 0.314179187 mirna_pc |
| 10489 hsa-mir-1301 | CABLES2      | 0.329023646 mirna_pc |
| 10490 hsa-mir-1301 | ZNF277       | 0.439418127 mirna_pc |
| 10491 hsa-mir-1301 | PELP1        | 0.350280822 mirna_pc |
| 10492 hsa-mir-1301 | ACPL2        | 0.360304793 mirna_pc |
| 10493 hsa-mir-1301 | THOC1        | 0.35176662 mirna_pc  |
| 10494 hsa-mir-1301 | C11orf45     | 0.396288951 mirna_pc |
| 10495 hsa-mir-1301 | CCDC15       | 0.305275237 mirna_pc |
| 10496 hsa-mir-1301 | SFRS7        | 0.458388485 mirna_pc |
| 10497 hsa-mir-1301 | GPR98        | 0.317432494 mirna_pc |
| 10498 hsa-mir-1301 | LOC151534    | 0.305390712 mirna_pc |
| 10499 hsa-mir-1301 | TRMT2A       | 0.325369522 mirna_pc |
| 10500 hsa-mir-1301 | IFRD1        | 0.401930677 mirna_pc |
| 10501 hsa-mir-1301 | PCBP2        | 0.344123135 mirna_pc |
| 10502 hsa-mir-1301 | UBE20        | 0.314759284 mirna_pc |
| 10503 hsa-mir-1301 | PFAS         | 0.315733416 mirna_pc |
| 10504 hsa-mir-1301 | INO80B       | 0.311524042 mirna_pc |
| 10505 hsa-mir-1301 | SARS2        | 0.390931432 mirna_pc |
| 10506 hsa-mir-1301 | LOC100128292 | 0.310845417 mirna_pc |
| 10507 hsa-mir-1301 | CORO1B       | 0.31465318 mirna_pc  |
| 10508 hsa-mir-1301 | ANKIB1       | 0.315438318 mirna_pc |
| 10509 hsa-mir-1301 | RPUSD2       | 0.325434623 mirna_pc |
| 10510 hsa-mir-1301 | THYN1        | 0.506130397 mirna_pc |
| 10511 hsa-mir-1301 | PARL         | 0.37930448 mirna_pc  |
| 10512 hsa-mir-1301 | C2orf68      | 0.547160563 mirna_pc |
| 10513 hsa-mir-1301 | ARPC1A       | 0.345416918 mirna_pc |
| 10514 hsa-mir-1301 | C17orf80     | 0.380847062 mirna_pc |
| 10515 hsa-mir-1301 | ANKRD23      | 0.311542606 mirna_pc |
| 10516 hsa-mir-1301 | IRF2BP1      | 0.418666468 mirna_pc |
| 10517 hsa-mir-1301 | APLP2        | 0.379194114 mirna_pc |
| 10518 hsa-mir-1301 | C17orf75     | 0.459568435 mirna_pc |
| 10519 hsa-mir-1301 | ZBTB44       | 0.424686268 mirna_pc |
| 10520 hsa-mir-1301 | ZNF235       | 0.304475575 mirna_pc |
| 10521 hsa-mir-1301 | SPRYD4       | 0.364045637 mirna_pc |
| 10522 hsa-mir-1301 | EXT2         | 0.397868552 mirna_pc |
| 10523 hsa-mir-1301 | NUP210       | 0.312525528 mirna_pc |
| 10524 hsa-mir-1301 | ZNF789       | 0.439357125 mirna_pc |
| 10525 hsa-mir-1301 | ZNF771       | 0.335165047 mirna_pc |
| 10526 hsa-mir-1301 | EEF1E1       | 0.389028053 mirna_pc |
| 10527 hsa-mir-1301 | PGRMC1       | 0.303492919 mirna_pc |
| 10528 hsa-mir-1301 | MRPL38       | 0.380848215 mirna_pc |
| 10529 hsa-mir-1301 | LOC728024    | 0.300868323 mirna_pc |

|                    |           |                      |
|--------------------|-----------|----------------------|
| 10530 hsa-mir-1301 | EID2      | 0.374378279 mirna_pc |
| 10531 hsa-mir-1301 | ATPBD4    | 0.376933552 mirna_pc |
| 10532 hsa-mir-1301 | GDF11     | 0.391553451 mirna_pc |
| 10533 hsa-mir-1301 | C14orf104 | 0.307877095 mirna_pc |
| 10534 hsa-mir-1301 | ZKSCAN5   | 0.495513218 mirna_pc |
| 10535 hsa-mir-1301 | POLR2C    | 0.352038231 mirna_pc |
| 10536 hsa-mir-1301 | C12orf10  | 0.407655383 mirna_pc |
| 10537 hsa-mir-1301 | GNAS      | 0.308072347 mirna_pc |
| 10538 hsa-mir-1301 | PPP1R2    | 0.312805276 mirna_pc |
| 10539 hsa-mir-1301 | C12orf45  | 0.371201084 mirna_pc |
| 10540 hsa-mir-1301 | C2orf44   | 0.390061 mirna_pc    |
| 10541 hsa-mir-1301 | RING1     | 0.391622695 mirna_pc |
| 10542 hsa-mir-1301 | SEPHS1    | 0.389883312 mirna_pc |
| 10543 hsa-mir-1301 | RPS19BP1  | 0.304156575 mirna_pc |
| 10544 hsa-mir-1301 | C22orf27  | 0.300807825 mirna_pc |
| 10545 hsa-mir-1301 | PNKP      | 0.379117688 mirna_pc |
| 10546 hsa-mir-1301 | GBAS      | 0.385605103 mirna_pc |
| 10547 hsa-mir-1301 | C8orf40   | 0.406709518 mirna_pc |
| 10548 hsa-mir-1301 | AIP       | 0.31303999 mirna_pc  |
| 10549 hsa-mir-1301 | ERP29     | 0.307097584 mirna_pc |
| 10550 hsa-mir-1301 | NAB2      | 0.313565567 mirna_pc |
| 10551 hsa-mir-1301 | CEBPZ     | 0.318072045 mirna_pc |
| 10552 hsa-mir-1301 | BOLA3     | 0.451345639 mirna_pc |
| 10553 hsa-mir-1301 | C19orf23  | 0.519725172 mirna_pc |
| 10554 hsa-mir-1301 | GPS1      | 0.312352522 mirna_pc |
| 10555 hsa-mir-1301 | MYL6B     | 0.419806568 mirna_pc |
| 10556 hsa-mir-1301 | PDCD7     | 0.336043883 mirna_pc |
| 10557 hsa-mir-1301 | ZNRF3     | 0.314647794 mirna_pc |
| 10558 hsa-mir-1301 | C11orf71  | 0.408232845 mirna_pc |
| 10559 hsa-mir-1301 | POLR2F    | 0.318647145 mirna_pc |
| 10560 hsa-mir-1301 | DTX3      | 0.323439909 mirna_pc |
| 10561 hsa-mir-1301 | ALKBH3    | 0.350931409 mirna_pc |
| 10562 hsa-mir-1301 | ZNF233    | 0.325092218 mirna_pc |
| 10563 hsa-mir-1301 | TEAD2     | 0.309171011 mirna_pc |
| 10564 hsa-mir-1301 | CAMTA1    | 0.312657356 mirna_pc |
| 10565 hsa-mir-1301 | MRPS15    | 0.32953687 mirna_pc  |
| 10566 hsa-mir-1301 | C17orf58  | 0.401858516 mirna_pc |
| 10567 hsa-mir-1301 | HNRNPUL1  | 0.342456087 mirna_pc |
| 10568 hsa-mir-1301 | NARS2     | 0.374923809 mirna_pc |
| 10569 hsa-mir-1301 | LYRM4     | 0.471516826 mirna_pc |
| 10570 hsa-mir-1301 | FAM133B   | 0.526524494 mirna_pc |
| 10571 hsa-mir-1301 | BCL11A    | 0.336197251 mirna_pc |
| 10572 hsa-mir-1301 | ALMS1     | 0.339528889 mirna_pc |
| 10573 hsa-mir-1301 | ANP32A    | 0.379640059 mirna_pc |
| 10574 hsa-mir-1301 | SPDYA     | 0.324929586 mirna_pc |
| 10575 hsa-mir-1301 | DUSP28    | 0.300331263 mirna_pc |
| 10576 hsa-mir-1301 | ETAA1     | 0.308248339 mirna_pc |
| 10577 hsa-mir-1301 | C17orf81  | 0.336440592 mirna_pc |
| 10578 hsa-mir-1301 | HYLS1     | 0.40908372 mirna_pc  |
| 10579 hsa-mir-1301 | HIC2      | 0.34915132 mirna_pc  |
| 10580 hsa-mir-1301 | LRFN1     | 0.423785862 mirna_pc |
| 10581 hsa-mir-1301 | C7orf60   | 0.35347271 mirna_pc  |
| 10582 hsa-mir-1301 | NAPIL1    | 0.363949457 mirna_pc |
| 10583 hsa-mir-1301 | THAP7     | 0.313228871 mirna_pc |



|                    |              |                      |
|--------------------|--------------|----------------------|
| 10584 hsa-mir-1301 | LCMT2        | 0.383296359 mirna_pc |
| 10585 hsa-mir-1301 | SNF8         | 0.302067298 mirna_pc |
| 10586 hsa-mir-1301 | C1orf156     | 0.414391009 mirna_pc |
| 10587 hsa-mir-1301 | SLC26A11     | 0.422467355 mirna_pc |
| 10588 hsa-mir-1301 | ZNF428       | 0.330466857 mirna_pc |
| 10589 hsa-mir-1301 | RNASEH2C     | 0.319089591 mirna_pc |
| 10590 hsa-mir-1301 | KIAA1383     | 0.304791439 mirna_pc |
| 10591 hsa-mir-1301 | LOC100132287 | 0.315273544 mirna_pc |
| 10592 hsa-mir-1301 | HNRNPA0      | 0.342064525 mirna_pc |
| 10593 hsa-mir-1301 | ZNF300       | 0.394725453 mirna_pc |
| 10594 hsa-mir-1301 | MORN2        | 0.457227315 mirna_pc |
| 10595 hsa-mir-1301 | C12orf41     | 0.342714852 mirna_pc |
| 10596 hsa-mir-1301 | SETD6        | 0.360078282 mirna_pc |
| 10597 hsa-mir-1301 | C15orf40     | 0.400936066 mirna_pc |
| 10598 hsa-mir-1301 | SRP14        | 0.354416901 mirna_pc |
| 10599 hsa-mir-1301 | MESDC2       | 0.327194037 mirna_pc |
| 10600 hsa-mir-1301 | GOLGA7       | 0.317432628 mirna_pc |
| 10601 hsa-mir-1301 | MTERF        | 0.591782045 mirna_pc |
| 10602 hsa-mir-1301 | SBK1         | 0.424617195 mirna_pc |
| 10603 hsa-mir-1301 | AFMID        | 0.380960284 mirna_pc |
| 10604 hsa-mir-1301 | C7orf64      | 0.386389339 mirna_pc |
| 10605 hsa-mir-1301 | TRIM24       | 0.358400651 mirna_pc |
| 10606 hsa-mir-1301 | C21orf67     | 0.310916007 mirna_pc |
| 10607 hsa-mir-1301 | C5orf55      | 0.329154917 mirna_pc |
| 10608 hsa-mir-1301 | USP13        | 0.371238031 mirna_pc |
| 10609 hsa-mir-1301 | LIPT1        | 0.335111671 mirna_pc |
| 10610 hsa-mir-1301 | NDUFAF3      | 0.306927416 mirna_pc |
| 10611 hsa-mir-1301 | RASL10B      | 0.410738513 mirna_pc |
| 10612 hsa-mir-1301 | DNM1P35      | 0.345543816 mirna_pc |
| 10613 hsa-mir-1301 | SLC25A33     | 0.43357833 mirna_pc  |
| 10614 hsa-mir-1301 | MSI1         | 0.423463708 mirna_pc |
| 10615 hsa-mir-1301 | OST4         | 0.327380473 mirna_pc |
| 10616 hsa-mir-1301 | GTF2H2C      | 0.349690406 mirna_pc |
| 10617 hsa-mir-1301 | USP36        | 0.30010668 mirna_pc  |
| 10618 hsa-mir-1301 | GXYLT1       | 0.312252957 mirna_pc |
| 10619 hsa-mir-1301 | TMEM18       | 0.345501205 mirna_pc |
| 10620 hsa-mir-1301 | BCS1L        | 0.320355017 mirna_pc |
| 10621 hsa-mir-1301 | C2orf56      | 0.39422726 mirna_pc  |
| 10622 hsa-mir-1301 | ZNF394       | 0.428801202 mirna_pc |
| 10623 hsa-mir-1301 | PAQR6        | 0.323431297 mirna_pc |
| 10624 hsa-mir-1301 | DDX51        | 0.405299663 mirna_pc |
| 10625 hsa-mir-1301 | WDR83        | 0.360719816 mirna_pc |
| 10626 hsa-mir-1301 | C6orf162     | 0.349001567 mirna_pc |
| 10627 hsa-mir-1301 | PBX2         | 0.376400765 mirna_pc |
| 10628 hsa-mir-1301 | C21orf59     | 0.397551355 mirna_pc |
| 10629 hsa-mir-1301 | GTF2H2       | 0.364315898 mirna_pc |
| 10630 hsa-mir-1301 | ZBTB39       | 0.447750983 mirna_pc |
| 10631 hsa-mir-1301 | NRCAM        | 0.334703147 mirna_pc |
| 10632 hsa-mir-1301 | SNRNP27      | 0.34184293 mirna_pc  |
| 10633 hsa-mir-1301 | C1orf56      | 0.486162079 mirna_pc |
| 10634 hsa-mir-1301 | ENO3         | 0.439381318 mirna_pc |
| 10635 hsa-mir-1301 | RPAIN        | 0.362366935 mirna_pc |
| 10636 hsa-mir-1301 | FANCF        | 0.312273826 mirna_pc |
| 10637 hsa-mir-1301 | CCDC90B      | 0.462000702 mirna_pc |

|                    |           |                      |
|--------------------|-----------|----------------------|
| 10638 hsa-mir-1301 | VPS54     | 0.432157281 mirna_pc |
| 10639 hsa-mir-1301 | ASPSCR1   | 0.31007777 mirna_pc  |
| 10640 hsa-mir-1301 | LOC221710 | 0.309918811 mirna_pc |
| 10641 hsa-mir-1301 | GAA       | 0.310940564 mirna_pc |
| 10642 hsa-mir-1301 | API5      | 0.448614087 mirna_pc |
| 10643 hsa-mir-1301 | CIAO1     | 0.361894716 mirna_pc |
| 10644 hsa-mir-1301 | USP28     | 0.34059331 mirna_pc  |
| 10645 hsa-mir-1301 | C2orf3    | 0.515245339 mirna_pc |
| 10646 hsa-mir-1301 | CHD4      | 0.305312929 mirna_pc |
| 10647 hsa-mir-1301 | KRIT1     | 0.443753701 mirna_pc |
| 10648 hsa-mir-1301 | FAM119A   | 0.356448363 mirna_pc |
| 10649 hsa-mir-1301 | DHRS2     | 0.486852526 mirna_pc |
| 10650 hsa-mir-1301 | MEAF6     | 0.338023372 mirna_pc |
| 10651 hsa-mir-1301 | ZNF664    | 0.33327386 mirna_pc  |
| 10652 hsa-mir-1301 | ACOT13    | 0.405948182 mirna_pc |
| 10653 hsa-mir-1301 | FGFBP3    | 0.386352393 mirna_pc |
| 10654 hsa-mir-1301 | RRP7B     | 0.312887821 mirna_pc |
| 10655 hsa-mir-1301 | DNAJC19   | 0.453746686 mirna_pc |
| 10656 hsa-mir-1301 | TMEM134   | 0.339612304 mirna_pc |
| 10657 hsa-mir-1301 | CCDC157   | 0.326642215 mirna_pc |
| 10658 hsa-mir-1301 | PEX1      | 0.398066476 mirna_pc |
| 10659 hsa-mir-1301 | SCML2     | 0.389061154 mirna_pc |
| 10660 hsa-mir-1301 | C12orf65  | 0.315803003 mirna_pc |
| 10661 hsa-mir-1301 | DIS3L2    | 0.363266976 mirna_pc |
| 10662 hsa-mir-1301 | NMNAT3    | 0.323492269 mirna_pc |
| 10663 hsa-mir-1301 | MRPL19    | 0.409092331 mirna_pc |
| 10664 hsa-mir-1301 | C11orf35  | 0.346926371 mirna_pc |
| 10665 hsa-mir-1301 | HSF2      | 0.32203668 mirna_pc  |
| 10666 hsa-mir-1301 | CETN3     | 0.412196311 mirna_pc |
| 10667 hsa-mir-1301 | ZNF513    | 0.45144071 mirna_pc  |
| 10668 hsa-mir-1301 | ENGASE    | 0.3069852 mirna_pc   |
| 10669 hsa-mir-1301 | PROX1     | 0.318382711 mirna_pc |
| 10670 hsa-mir-1301 | B9D1      | 0.348896852 mirna_pc |
| 10671 hsa-mir-1301 | DDX1      | 0.359373333 mirna_pc |
| 10672 hsa-mir-1301 | LSM 1.00  | 0.436609504 mirna_pc |
| 10673 hsa-mir-1301 | PRPF40B   | 0.33363228 mirna_pc  |
| 10674 hsa-mir-1301 | DYNC1I1   | 0.506149008 mirna_pc |
| 10675 hsa-mir-1301 | GLI4      | 0.374255675 mirna_pc |
| 10676 hsa-mir-1301 | PRDXDD1P  | 0.306296218 mirna_pc |
| 10677 hsa-mir-1301 | AADAT     | 0.368019655 mirna_pc |
| 10678 hsa-mir-1301 | ACPI      | 0.482882991 mirna_pc |
| 10679 hsa-mir-1301 | WASH3P    | 0.371501734 mirna_pc |
| 10680 hsa-mir-1301 | GATAD1    | 0.316100827 mirna_pc |
| 10681 hsa-mir-1301 | ZNF322A   | 0.578205652 mirna_pc |
| 10682 hsa-mir-1301 | CDAN1     | 0.321837254 mirna_pc |
| 10683 hsa-mir-1301 | PRR22     | 0.30186233 mirna_pc  |
| 10684 hsa-mir-1301 | SERF1A    | 0.453872865 mirna_pc |
| 10685 hsa-mir-1301 | LOC728640 | 0.369962777 mirna_pc |
| 10686 hsa-mir-1301 | B4GALNT4  | 0.323402514 mirna_pc |
| 10687 hsa-mir-1301 | PRMT6     | 0.418283016 mirna_pc |
| 10688 hsa-mir-1301 | ZMYM3     | 0.330504815 mirna_pc |
| 10689 hsa-mir-1301 | LOC401397 | 0.569918496 mirna_pc |
| 10690 hsa-mir-1301 | GPS2      | 0.351038186 mirna_pc |
| 10691 hsa-mir-1301 | C21orf119 | 0.485153836 mirna_pc |

|                    |           |                      |
|--------------------|-----------|----------------------|
| 10692 hsa-mir-1301 | C2orf28   | 0.497975295 mirna_pc |
| 10693 hsa-mir-1301 | HSPC157   | 0.306649437 mirna_pc |
| 10694 hsa-mir-1301 | TMEM14B   | 0.406385897 mirna_pc |
| 10695 hsa-mir-1301 | AGA       | 0.311781077 mirna_pc |
| 10696 hsa-mir-1301 | TMEM168   | 0.5043897 mirna_pc   |
| 10697 hsa-mir-1301 | CCDC75    | 0.306804312 mirna_pc |
| 10698 hsa-mir-1301 | SV2A      | 0.35242779 mirna_pc  |
| 10699 hsa-mir-1301 | THOC5     | 0.301641767 mirna_pc |
| 10700 hsa-mir-1301 | MRPL53    | 0.476831418 mirna_pc |
| 10701 hsa-mir-1301 | SCARNA2   | 0.30429888 mirna_pc  |
| 10702 hsa-mir-1301 | PPCDC     | 0.336398171 mirna_pc |
| 10703 hsa-mir-1301 | DNMT3A    | 0.485138657 mirna_pc |
| 10704 hsa-mir-1301 | NDUFS8    | 0.411774925 mirna_pc |
| 10705 hsa-mir-1301 | ACCN2     | 0.430865244 mirna_pc |
| 10706 hsa-mir-1301 | C12orf73  | 0.39784526 mirna_pc  |
| 10707 hsa-mir-1301 | PATZ1     | 0.366731502 mirna_pc |
| 10708 hsa-mir-1301 | C3orf33   | 0.319692576 mirna_pc |
| 10709 hsa-mir-99a  | HOXC8     | 0.321526767 mirna_pc |
| 10710 hsa-mir-99a  | SEMA3E    | 0.730874593 mirna_pc |
| 10711 hsa-mir-99a  | C4orf34   | 0.329991064 mirna_pc |
| 10712 hsa-mir-99a  | MAPT      | 0.309230624 mirna_pc |
| 10713 hsa-mir-99a  | EEF1A2    | 0.474882023 mirna_pc |
| 10714 hsa-mir-99a  | MYEF2     | 0.358641252 mirna_pc |
| 10715 hsa-mir-99a  | MYST4     | 0.519690444 mirna_pc |
| 10716 hsa-mir-99a  | ZNF467    | 0.385675372 mirna_pc |
| 10717 hsa-mir-99a  | ID4       | 0.434604375 mirna_pc |
| 10718 hsa-mir-99a  | YPEL1     | 0.544036682 mirna_pc |
| 10719 hsa-mir-99a  | C22orf39  | 0.395035122 mirna_pc |
| 10720 hsa-mir-99a  | ZNF425    | 0.345819804 mirna_pc |
| 10721 hsa-mir-99a  | ZNF25     | 0.372491666 mirna_pc |
| 10722 hsa-mir-99a  | CITED2    | 0.700245964 mirna_pc |
| 10723 hsa-mir-99a  | SMARCD3   | 0.304054208 mirna_pc |
| 10724 hsa-mir-99a  | TBC1D9    | 0.330765387 mirna_pc |
| 10725 hsa-mir-99a  | ATP1B2    | 0.377011459 mirna_pc |
| 10726 hsa-mir-99a  | CRYZL1    | 0.351408841 mirna_pc |
| 10727 hsa-mir-99a  | ZNF429    | 0.35482366 mirna_pc  |
| 10728 hsa-mir-99a  | PTGDS     | 0.321361623 mirna_pc |
| 10729 hsa-mir-99a  | WBSCR17   | 0.321754794 mirna_pc |
| 10730 hsa-mir-99a  | NR2F2     | 0.61754439 mirna_pc  |
| 10731 hsa-mir-99a  | MAGI2     | 0.35405136 mirna_pc  |
| 10732 hsa-mir-99a  | UTRN      | 0.3230453 mirna_pc   |
| 10733 hsa-mir-99a  | C17orf108 | 0.324768524 mirna_pc |
| 10734 hsa-mir-99a  | RSP03     | 0.312399046 mirna_pc |
| 10735 hsa-mir-99a  | HDHD2     | 0.334819544 mirna_pc |
| 10736 hsa-mir-99a  | DTWD1     | 0.377720501 mirna_pc |
| 10737 hsa-mir-99a  | CSDC2     | 0.33079765 mirna_pc  |
| 10738 hsa-mir-99a  | RASGRP2   | 0.499028118 mirna_pc |
| 10739 hsa-mir-99a  | MXI1      | 0.32823222 mirna_pc  |
| 10740 hsa-mir-99a  | FAT4      | 0.379087201 mirna_pc |
| 10741 hsa-mir-99a  | ZNF439    | 0.509151962 mirna_pc |
| 10742 hsa-mir-99a  | SUOX      | 0.314156572 mirna_pc |
| 10743 hsa-mir-99a  | POLI      | 0.596945734 mirna_pc |
| 10744 hsa-mir-99a  | RNF185    | 0.385421745 mirna_pc |
| 10745 hsa-mir-99a  | EZH1      | 0.320746817 mirna_pc |

|                   |           |                      |
|-------------------|-----------|----------------------|
| 10746 hsa-mir-99a | TTC3      | 0.39853087 mirna_pc  |
| 10747 hsa-mir-99a | LOC286367 | 0.423515503 mirna_pc |
| 10748 hsa-mir-99a | RAB5B     | 0.310184722 mirna_pc |
| 10749 hsa-mir-99a | CCDC106   | 0.409379049 mirna_pc |
| 10750 hsa-mir-99a | SLC5A12   | 0.408169743 mirna_pc |
| 10751 hsa-mir-99a | DLG4      | 0.389737415 mirna_pc |
| 10752 hsa-mir-99a | USP25     | 0.556368575 mirna_pc |
| 10753 hsa-mir-99a | LOC375190 | 0.615795142 mirna_pc |
| 10754 hsa-mir-99a | CRY1      | 0.307980581 mirna_pc |
| 10755 hsa-mir-99a | MTMR3     | 0.360201446 mirna_pc |
| 10756 hsa-mir-99a | HIST1H3D  | 0.317177784 mirna_pc |
| 10757 hsa-mir-99a | SLC2A11   | 0.514827746 mirna_pc |
| 10758 hsa-mir-99a | ZNF433    | 0.402555885 mirna_pc |
| 10759 hsa-mir-99a | TYW3      | 0.621563665 mirna_pc |
| 10760 hsa-mir-99a | ALS2CR8   | 0.337120838 mirna_pc |
| 10761 hsa-mir-99a | MKL2      | 0.374897702 mirna_pc |
| 10762 hsa-mir-99a | TNRC6C    | 0.331298811 mirna_pc |
| 10763 hsa-mir-99a | PPP1R14A  | 0.308405471 mirna_pc |
| 10764 hsa-mir-99a | ELAC1     | 0.303858818 mirna_pc |
| 10765 hsa-mir-99a | TBC1D17   | 0.334557675 mirna_pc |
| 10766 hsa-mir-99a | OXR1      | 0.357740745 mirna_pc |
| 10767 hsa-mir-99a | DOCK3     | 0.352824042 mirna_pc |
| 10768 hsa-mir-99a | ZNF248    | 0.340296208 mirna_pc |
| 10769 hsa-mir-99a | TUB       | 0.402370057 mirna_pc |
| 10770 hsa-mir-99a | FIGN      | 0.70593806 mirna_pc  |
| 10771 hsa-mir-99a | PRRT1     | 0.521398298 mirna_pc |
| 10772 hsa-mir-99a | RADIL     | 0.320914612 mirna_pc |
| 10773 hsa-mir-99a | ARSG      | 0.439294364 mirna_pc |
| 10774 hsa-mir-99a | RBP7      | 0.306788882 mirna_pc |
| 10775 hsa-mir-99a | SAMD11    | 0.52934971 mirna_pc  |
| 10776 hsa-mir-99a | PHF10     | 0.457187297 mirna_pc |
| 10777 hsa-mir-99a | LOC284900 | 0.453404283 mirna_pc |
| 10778 hsa-mir-99a | CAPS2     | 0.601171913 mirna_pc |
| 10779 hsa-mir-99a | PHC1      | 0.488809416 mirna_pc |
| 10780 hsa-mir-99a | SCD5      | 0.362303881 mirna_pc |
| 10781 hsa-mir-99a | CCDC121   | 0.385598809 mirna_pc |
| 10782 hsa-mir-99a | SSBP2     | 0.41844743 mirna_pc  |
| 10783 hsa-mir-99a | HABP4     | 0.648211635 mirna_pc |
| 10784 hsa-mir-99a | TBCEL     | 0.367107477 mirna_pc |
| 10785 hsa-mir-99a | C20orf160 | 0.561346457 mirna_pc |
| 10786 hsa-mir-99a | CSAD      | 0.466876219 mirna_pc |
| 10787 hsa-mir-99a | SFRS18    | 0.326882044 mirna_pc |
| 10788 hsa-mir-99a | PRAME     | 0.372246626 mirna_pc |
| 10789 hsa-mir-99a | KIAA0776  | 0.330572065 mirna_pc |
| 10790 hsa-mir-99a | LRRC4B    | 0.403924252 mirna_pc |
| 10791 hsa-mir-99a | CA11      | 0.527670717 mirna_pc |
| 10792 hsa-mir-99a | EIF4ENIF1 | 0.591041753 mirna_pc |
| 10793 hsa-mir-99a | BAIAP3    | 0.410048958 mirna_pc |
| 10794 hsa-mir-99a | LOC653501 | 0.360541723 mirna_pc |
| 10795 hsa-mir-99a | TUG1      | 0.411779026 mirna_pc |
| 10796 hsa-mir-99a | AMN1      | 0.482998219 mirna_pc |
| 10797 hsa-mir-99a | MGC21881  | 0.352962639 mirna_pc |
| 10798 hsa-mir-99a | FAM184A   | 0.354474293 mirna_pc |
| 10799 hsa-mir-99a | TDRD5     | 0.310048754 mirna_pc |

|                   |           |                      |
|-------------------|-----------|----------------------|
| 10800 hsa-mir-99a | CILP2     | 0.468841171 mirna_pc |
| 10801 hsa-mir-99a | ATP8B2    | 0.329029545 mirna_pc |
| 10802 hsa-mir-99a | ZNF70     | 0.41257459 mirna_pc  |
| 10803 hsa-mir-99a | GRAMD1C   | 0.541355283 mirna_pc |
| 10804 hsa-mir-99a | CTS0      | 0.304016386 mirna_pc |
| 10805 hsa-mir-99a | ZNF217    | 0.434494113 mirna_pc |
| 10806 hsa-mir-99a | CYTSA     | 0.368961407 mirna_pc |
| 10807 hsa-mir-99a | ZNF606    | 0.317083151 mirna_pc |
| 10808 hsa-mir-99a | DYRK1A    | 0.351233689 mirna_pc |
| 10809 hsa-mir-99a | ZNF236    | 0.367617375 mirna_pc |
| 10810 hsa-mir-99a | SOS 1     | 0.309799035 mirna_pc |
| 10811 hsa-mir-99a | EFHD1     | 0.379702878 mirna_pc |
| 10812 hsa-mir-99a | LPHN2     | 0.586420109 mirna_pc |
| 10813 hsa-mir-99a | ZNF23     | 0.337558312 mirna_pc |
| 10814 hsa-mir-99a | AMY2B     | 0.320798463 mirna_pc |
| 10815 hsa-mir-99a | CDKL3     | 0.35488473 mirna_pc  |
| 10816 hsa-mir-99a | BARD1     | 0.313217538 mirna_pc |
| 10817 hsa-mir-99a | CNTNAP3   | 0.413721622 mirna_pc |
| 10818 hsa-mir-99a | ATF7      | 0.31521414 mirna_pc  |
| 10819 hsa-mir-99a | ZNF559    | 0.313251236 mirna_pc |
| 10820 hsa-mir-99a | ZNF155    | 0.310946751 mirna_pc |
| 10821 hsa-mir-99a | EDIL3     | 0.449687223 mirna_pc |
| 10822 hsa-mir-99a | LOC144571 | 0.483304279 mirna_pc |
| 10823 hsa-mir-99a | ZNF608    | 0.332136013 mirna_pc |
| 10824 hsa-mir-99a | SEMA3D    | 0.735442916 mirna_pc |
| 10825 hsa-mir-99a | HACE1     | 0.391188416 mirna_pc |
| 10826 hsa-mir-99a | ZNF187    | 0.335046395 mirna_pc |
| 10827 hsa-mir-99a | KLRA1     | 0.367621989 mirna_pc |
| 10828 hsa-mir-99a | FLJ10038  | 0.364285107 mirna_pc |
| 10829 hsa-mir-99a | ZKSCAN2   | 0.303916003 mirna_pc |
| 10830 hsa-mir-99a | SLC25A30  | 0.437920048 mirna_pc |
| 10831 hsa-mir-99a | ZNF658    | 0.438708443 mirna_pc |
| 10832 hsa-mir-99a | RBM43     | 0.425653526 mirna_pc |
| 10833 hsa-mir-99a | GATA3     | 0.533110665 mirna_pc |
| 10834 hsa-mir-99a | EPM2AIP1  | 0.333481152 mirna_pc |
| 10835 hsa-mir-99a | TRIM13    | 0.314490343 mirna_pc |
| 10836 hsa-mir-99a | LOC374443 | 0.332323723 mirna_pc |
| 10837 hsa-mir-99a | RNPC3     | 0.368044674 mirna_pc |
| 10838 hsa-mir-99a | PTCH1     | 0.306274128 mirna_pc |
| 10839 hsa-mir-99a | USP34     | 0.312085997 mirna_pc |
| 10840 hsa-mir-99a | OXTR      | 0.396017639 mirna_pc |
| 10841 hsa-mir-99a | PAQR7     | 0.354459972 mirna_pc |
| 10842 hsa-mir-99a | THSD7A    | 0.564946403 mirna_pc |
| 10843 hsa-mir-99a | PPM1J     | 0.338624377 mirna_pc |
| 10844 hsa-mir-99a | ZNF605    | 0.408620815 mirna_pc |
| 10845 hsa-mir-99a | NDST2     | 0.348518089 mirna_pc |
| 10846 hsa-mir-99a | RRAGB     | 0.404512869 mirna_pc |
| 10847 hsa-mir-99a | KLRAQ1    | 0.375708694 mirna_pc |
| 10848 hsa-mir-99a | PHF21A    | 0.348752145 mirna_pc |
| 10849 hsa-mir-99a | SSPN      | 0.331400051 mirna_pc |
| 10850 hsa-mir-99a | TCEA2     | 0.325813048 mirna_pc |
| 10851 hsa-mir-99a | OSR2      | 0.387750251 mirna_pc |
| 10852 hsa-mir-99a | LOC338799 | 0.312484332 mirna_pc |
| 10853 hsa-mir-99a | C12orf76  | 0.305172233 mirna_pc |

|       |             |           |             |          |
|-------|-------------|-----------|-------------|----------|
| 10854 | hsa-mir-99a | GABPA     | 0.413495055 | mirna_pc |
| 10855 | hsa-mir-99a | ZFP161    | 0.387065008 | mirna_pc |
| 10856 | hsa-mir-99a | ZNF503    | 0.402601713 | mirna_pc |
| 10857 | hsa-mir-99a | ING4      | 0.319461744 | mirna_pc |
| 10858 | hsa-mir-99a | C8orf51   | 0.304256472 | mirna_pc |
| 10859 | hsa-mir-99a | LOC728392 | 0.33528485  | mirna_pc |
| 10860 | hsa-mir-99a | LANCL1    | 0.334012584 | mirna_pc |
| 10861 | hsa-mir-99a | C1orf213  | 0.303739564 | mirna_pc |
| 10862 | hsa-mir-99a | ZNF607    | 0.375717885 | mirna_pc |
| 10863 | hsa-mir-99a | KCNC3     | 0.490339396 | mirna_pc |
| 10864 | hsa-mir-99a | RASSF8    | 0.319322686 | mirna_pc |
| 10865 | hsa-mir-99a | PIK3C3    | 0.351299154 | mirna_pc |
| 10866 | hsa-mir-99a | BTN2A2    | 0.308869962 | mirna_pc |
| 10867 | hsa-mir-99a | ZNF362    | 0.374224683 | mirna_pc |
| 10868 | hsa-mir-99a | CHST10    | 0.30239346  | mirna_pc |
| 10869 | hsa-mir-99a | CLEC2D    | 0.373879311 | mirna_pc |
| 10870 | hsa-mir-99a | ST8SIA1   | 0.336904579 | mirna_pc |
| 10871 | hsa-mir-99a | SUSD5     | 0.319743375 | mirna_pc |
| 10872 | hsa-mir-99a | ZNF675    | 0.329992444 | mirna_pc |
| 10873 | hsa-mir-99a | ZNF84     | 0.390816827 | mirna_pc |
| 10874 | hsa-mir-99a | TAF4B     | 0.304119979 | mirna_pc |
| 10875 | hsa-mir-99a | ZNF140    | 0.312402374 | mirna_pc |
| 10876 | hsa-mir-99a | MTA3      | 0.432613031 | mirna_pc |
| 10877 | hsa-mir-99a | ZSCAN12   | 0.316977184 | mirna_pc |
| 10878 | hsa-mir-99a | PUS10     | 0.376715007 | mirna_pc |
| 10879 | hsa-mir-99a | SEC61A2   | 0.353648279 | mirna_pc |
| 10880 | hsa-mir-99a | PSPC1     | 0.355784218 | mirna_pc |
| 10881 | hsa-mir-99a | INTU      | 0.3635005   | mirna_pc |
| 10882 | hsa-mir-99a | PPM1F     | 0.326396401 | mirna_pc |
| 10883 | hsa-mir-99a | TMC8      | 0.373624485 | mirna_pc |
| 10884 | hsa-mir-99a | NF2       | 0.468657797 | mirna_pc |
| 10885 | hsa-mir-99a | KPNA5     | 0.307078014 | mirna_pc |
| 10886 | hsa-mir-99a | MYBL1     | 0.498776812 | mirna_pc |
| 10887 | hsa-mir-99a | ZNF624    | 0.309198507 | mirna_pc |
| 10888 | hsa-mir-99a | CLSTN3    | 0.376485886 | mirna_pc |
| 10889 | hsa-mir-99a | RIMKLB    | 0.352301142 | mirna_pc |
| 10890 | hsa-mir-99a | GAS1      | 0.342063844 | mirna_pc |
| 10891 | hsa-mir-99a | ZNF512B   | 0.30475543  | mirna_pc |
| 10892 | hsa-mir-99a | EFNA5     | 0.552330667 | mirna_pc |
| 10893 | hsa-mir-99a | C18orf10  | 0.376077033 | mirna_pc |
| 10894 | hsa-mir-99a | OAZ2      | 0.301642898 | mirna_pc |
| 10895 | hsa-mir-99a | C10orf41  | 0.414970024 | mirna_pc |
| 10896 | hsa-mir-99a | MAMSTR    | 0.512514974 | mirna_pc |
| 10897 | hsa-mir-99a | TMEM136   | 0.453959051 | mirna_pc |
| 10898 | hsa-mir-99a | PNMAL2    | 0.351822545 | mirna_pc |
| 10899 | hsa-mir-99a | CCDC78    | 0.340920916 | mirna_pc |
| 10900 | hsa-mir-99a | DNM3      | 0.679344564 | mirna_pc |
| 10901 | hsa-mir-99a | TERF2IP   | 0.356993696 | mirna_pc |
| 10902 | hsa-mir-99a | WDR78     | 0.459216227 | mirna_pc |
| 10903 | hsa-mir-99a | KGFLP2    | 0.387989076 | mirna_pc |
| 10904 | hsa-mir-99a | IFT81     | 0.300728571 | mirna_pc |
| 10905 | hsa-mir-99a | ZNF184    | 0.342238755 | mirna_pc |
| 10906 | hsa-mir-99a | MBLAC2    | 0.403668271 | mirna_pc |
| 10907 | hsa-mir-99a | NIPSNAP1  | 0.474399537 | mirna_pc |

|                   |           |                      |
|-------------------|-----------|----------------------|
| 10908 hsa-mir-99a | DEPDC5    | 0.362246755 mirna_pc |
| 10909 hsa-mir-99a | C8orf37   | 0.563238248 mirna_pc |
| 10910 hsa-mir-99a | PDGFC     | 0.469358544 mirna_pc |
| 10911 hsa-mir-99a | WDR92     | 0.318625451 mirna_pc |
| 10912 hsa-mir-99a | SFI1      | 0.55925834 mirna_pc  |
| 10913 hsa-mir-99a | MAP3K12   | 0.617430224 mirna_pc |
| 10914 hsa-mir-99a | ZBTB10    | 0.383711229 mirna_pc |
| 10915 hsa-mir-99a | SOCS5     | 0.429003743 mirna_pc |
| 10916 hsa-mir-99a | TTC21B    | 0.336074167 mirna_pc |
| 10917 hsa-mir-99a | ZNF627    | 0.34055822 mirna_pc  |
| 10918 hsa-mir-99a | LDB1      | 0.322333893 mirna_pc |
| 10919 hsa-mir-99a | ANGPT1    | 0.722907975 mirna_pc |
| 10920 hsa-mir-99a | EXTL2     | 0.324665791 mirna_pc |
| 10921 hsa-mir-99a | ARID1A    | 0.324853886 mirna_pc |
| 10922 hsa-mir-99a | ATAD2B    | 0.318525309 mirna_pc |
| 10923 hsa-mir-99a | ZNF558    | 0.350705779 mirna_pc |
| 10924 hsa-mir-99a | NAB2      | 0.428594393 mirna_pc |
| 10925 hsa-mir-99a | ISYNA1    | 0.450684524 mirna_pc |
| 10926 hsa-mir-99a | LOC338758 | 0.430098767 mirna_pc |
| 10927 hsa-mir-99a | KIF27     | 0.337493342 mirna_pc |
| 10928 hsa-mir-99a | PCMTD2    | 0.32827616 mirna_pc  |
| 10929 hsa-mir-99a | CPT1C     | 0.32224471 mirna_pc  |
| 10930 hsa-mir-99a | ZNF638    | 0.361834301 mirna_pc |
| 10931 hsa-mir-99a | DGCR6L    | 0.316822622 mirna_pc |
| 10932 hsa-mir-99a | ZNF20     | 0.38676523 mirna_pc  |
| 10933 hsa-mir-99a | PIP5K1A   | 0.315123117 mirna_pc |
| 10934 hsa-mir-99a | TMX3      | 0.366027249 mirna_pc |
| 10935 hsa-mir-99a | ZNF512    | 0.467391094 mirna_pc |
| 10936 hsa-mir-99a | GRB14     | 0.437240688 mirna_pc |
| 10937 hsa-mir-99a | ZNF74     | 0.412305605 mirna_pc |
| 10938 hsa-mir-99a | HTR7P1    | 0.502112177 mirna_pc |
| 10939 hsa-mir-99a | OSGEPL1   | 0.305424973 mirna_pc |
| 10940 hsa-mir-99a | PEX13     | 0.328244658 mirna_pc |
| 10941 hsa-mir-99a | ETAA1     | 0.329339169 mirna_pc |
| 10942 hsa-mir-99a | HNRNPH3   | 0.314442901 mirna_pc |
| 10943 hsa-mir-99a | B4GALT6   | 0.339885207 mirna_pc |
| 10944 hsa-mir-99a | CEP290    | 0.310694429 mirna_pc |
| 10945 hsa-mir-99a | SP1       | 0.329454667 mirna_pc |
| 10946 hsa-mir-99a | CNIH2     | 0.453654997 mirna_pc |
| 10947 hsa-mir-99a | HHAT      | 0.367344311 mirna_pc |
| 10948 hsa-mir-99a | FAM22D    | 0.322827532 mirna_pc |
| 10949 hsa-mir-99a | EID3      | 0.564002422 mirna_pc |
| 10950 hsa-mir-99a | ALG10B    | 0.311551304 mirna_pc |
| 10951 hsa-mir-99a | KIAA1467  | 0.325145336 mirna_pc |
| 10952 hsa-mir-99a | PAPLN     | 0.312055922 mirna_pc |
| 10953 hsa-mir-99a | ABHD12    | 0.301293513 mirna_pc |
| 10954 hsa-mir-99a | GATS      | 0.524158411 mirna_pc |
| 10955 hsa-mir-99a | TRUB1     | 0.333075214 mirna_pc |
| 10956 hsa-mir-99a | PLAC2     | 0.606115286 mirna_pc |
| 10957 hsa-mir-99a | ROBO1     | 0.370952139 mirna_pc |
| 10958 hsa-mir-99a | PDIK1L    | 0.318488258 mirna_pc |
| 10959 hsa-mir-99a | C2orf15   | 0.311191071 mirna_pc |
| 10960 hsa-mir-99a | C12orf24  | 0.429888141 mirna_pc |
| 10961 hsa-mir-99a | CCDC102A  | 0.31432849 mirna_pc  |

|                   |           |                      |
|-------------------|-----------|----------------------|
| 10962 hsa-mir-99a | ZNF436    | 0.338784526 mirna_pc |
| 10963 hsa-mir-99a | NFYB      | 0.311000479 mirna_pc |
| 10964 hsa-mir-99a | LCA5L     | 0.369326493 mirna_pc |
| 10965 hsa-mir-99a | SEMA3A    | 0.588073638 mirna_pc |
| 10966 hsa-mir-99a | THNSL1    | 0.303622843 mirna_pc |
| 10967 hsa-mir-99a | USP13     | 0.399504443 mirna_pc |
| 10968 hsa-mir-99a | FAM120C   | 0.384171889 mirna_pc |
| 10969 hsa-mir-99a | PDGFRL    | 0.433184569 mirna_pc |
| 10970 hsa-mir-99a | GPR37     | 0.371468937 mirna_pc |
| 10971 hsa-mir-99a | SS18      | 0.355270476 mirna_pc |
| 10972 hsa-mir-99a | ZNF391    | 0.383392012 mirna_pc |
| 10973 hsa-mir-99a | IFT74     | 0.503258676 mirna_pc |
| 10974 hsa-mir-99a | MAST1     | 0.36742823 mirna_pc  |
| 10975 hsa-mir-99a | NR5A2     | 0.376788036 mirna_pc |
| 10976 hsa-mir-99a | TTC39C    | 0.304791697 mirna_pc |
| 10977 hsa-mir-99a | MDM1      | 0.700630318 mirna_pc |
| 10978 hsa-mir-99a | ZNF740    | 0.349719699 mirna_pc |
| 10979 hsa-mir-99a | TRO       | 0.39578241 mirna_pc  |
| 10980 hsa-mir-99a | BBS10     | 0.399694953 mirna_pc |
| 10981 hsa-mir-99a | PBX2      | 0.36929362 mirna_pc  |
| 10982 hsa-mir-99a | SFRS15    | 0.432768509 mirna_pc |
| 10983 hsa-mir-99a | SLITRK6   | 0.523731259 mirna_pc |
| 10984 hsa-mir-99a | ANKRD34A  | 0.396021119 mirna_pc |
| 10985 hsa-mir-99a | HAPLN1    | 0.68586448 mirna_pc  |
| 10986 hsa-mir-99a | SYNGAP1   | 0.413614028 mirna_pc |
| 10987 hsa-mir-99a | C8orf45   | 0.320381455 mirna_pc |
| 10988 hsa-mir-99a | DBNDD1    | 0.341165478 mirna_pc |
| 10989 hsa-mir-99a | PPOX      | 0.333782444 mirna_pc |
| 10990 hsa-mir-99a | SAMD10    | 0.312936338 mirna_pc |
| 10991 hsa-mir-99a | LOC221710 | 0.320987266 mirna_pc |
| 10992 hsa-mir-99a | TSGA10    | 0.465113765 mirna_pc |
| 10993 hsa-mir-99a | BRSK1     | 0.316191837 mirna_pc |
| 10994 hsa-mir-99a | DGCR6     | 0.419187432 mirna_pc |
| 10995 hsa-mir-99a | CRYZ      | 0.553733649 mirna_pc |
| 10996 hsa-mir-99a | TIA1      | 0.319669846 mirna_pc |
| 10997 hsa-mir-99a | SMEK2     | 0.354707493 mirna_pc |
| 10998 hsa-mir-99a | ATL2      | 0.421269893 mirna_pc |
| 10999 hsa-mir-99a | ZKSCAN4   | 0.330717069 mirna_pc |
| 11000 hsa-mir-99a | IL34      | 0.326115305 mirna_pc |
| 11001 hsa-mir-99a | TBX1      | 0.328588512 mirna_pc |
| 11002 hsa-mir-99a | KDELC2    | 0.346098203 mirna_pc |
| 11003 hsa-mir-99a | KILLIN    | 0.317224172 mirna_pc |
| 11004 hsa-mir-99a | PRICKLE1  | 0.543791884 mirna_pc |
| 11005 hsa-mir-99a | GCFC1     | 0.301002919 mirna_pc |
| 11006 hsa-mir-99a | ZCCHC11   | 0.368213882 mirna_pc |
| 11007 hsa-mir-99a | CETN3     | 0.306982869 mirna_pc |
| 11008 hsa-mir-99a | ZNF644    | 0.328893646 mirna_pc |
| 11009 hsa-mir-99a | PRPF40B   | 0.311823462 mirna_pc |
| 11010 hsa-mir-99a | TCTN1     | 0.322460245 mirna_pc |
| 11011 hsa-mir-99a | GLI1      | 0.349143948 mirna_pc |
| 11012 hsa-mir-99a | CTXN1     | 0.548517205 mirna_pc |
| 11013 hsa-mir-99a | RNF215    | 0.33499227 mirna_pc  |
| 11014 hsa-mir-99a | ZNF680    | 0.302306129 mirna_pc |
| 11015 hsa-mir-99a | LOC283070 | 0.545093915 mirna_pc |



|                    |              |                      |
|--------------------|--------------|----------------------|
| 11016 hsa-mir-99a  | CCDC117      | 0.307731055 mirna_pc |
| 11017 hsa-mir-99a  | HSDL1        | 0.443302274 mirna_pc |
| 11018 hsa-mir-99a  | SLC11A2      | 0.575744703 mirna_pc |
| 11019 hsa-mir-99a  | LOC100129387 | 0.482863931 mirna_pc |
| 11020 hsa-mir-99a  | FBX011       | 0.328380427 mirna_pc |
| 11021 hsa-mir-99a  | HEY2         | 0.406645173 mirna_pc |
| 11022 hsa-mir-99a  | ZFP37        | 0.311318292 mirna_pc |
| 11023 hsa-mir-99a  | HSPC157      | 0.316372262 mirna_pc |
| 11024 hsa-mir-99a  | AGA          | 0.317470814 mirna_pc |
| 11025 hsa-mir-99a  | CAMK1D       | 0.426139523 mirna_pc |
| 11026 hsa-mir-99a  | LCA5         | 0.671462648 mirna_pc |
| 11027 hsa-mir-99a  | CDC73        | 0.373489674 mirna_pc |
| 11028 hsa-mir-99a  | SLC2A3       | 0.344223163 mirna_pc |
| 11029 hsa-mir-99a  | C22orf29     | 0.368719186 mirna_pc |
| 11030 hsa-mir-99a  | WDSUB1       | 0.343606941 mirna_pc |
| 11031 hsa-mir-99a  | BTF3L4       | 0.386201347 mirna_pc |
| 11032 hsa-mir-1269 | GFRA1        | 0.641023905 mirna_pc |
| 11033 hsa-mir-1269 | CENPF        | 0.378070803 mirna_pc |
| 11034 hsa-mir-1269 | RCC2         | 0.347534113 mirna_pc |
| 11035 hsa-mir-1269 | GHR          | 0.369463084 mirna_pc |
| 11036 hsa-mir-1269 | ITGA9        | 0.496422578 mirna_pc |
| 11037 hsa-mir-1269 | KIF2C        | 0.303290725 mirna_pc |
| 11038 hsa-mir-1269 | NCAPG        | 0.367828495 mirna_pc |
| 11039 hsa-mir-1269 | CCNA2        | 0.422535713 mirna_pc |
| 11040 hsa-mir-1269 | NEK2         | 0.324333694 mirna_pc |
| 11041 hsa-mir-1269 | MND1         | 0.502757271 mirna_pc |
| 11042 hsa-mir-1269 | RAD54L       | 0.31590238 mirna_pc  |
| 11043 hsa-mir-1269 | MAD2L1       | 0.478558439 mirna_pc |
| 11044 hsa-mir-1269 | LMNB1        | 0.314973886 mirna_pc |
| 11045 hsa-mir-1269 | TACC3        | 0.308560397 mirna_pc |
| 11046 hsa-mir-1269 | STMN1        | 0.392946383 mirna_pc |
| 11047 hsa-mir-1269 | TPCN2        | 0.343365519 mirna_pc |
| 11048 hsa-mir-1269 | CKS1B        | 0.318358923 mirna_pc |
| 11049 hsa-mir-1269 | TUBB         | 0.325963829 mirna_pc |
| 11050 hsa-mir-1269 | NUF2         | 0.310561011 mirna_pc |
| 11051 hsa-mir-1269 | SFRP1        | 0.507989192 mirna_pc |
| 11052 hsa-mir-1269 | PLK4         | 0.514516788 mirna_pc |
| 11053 hsa-mir-1269 | CAPN6        | 0.64482911 mirna_pc  |
| 11054 hsa-mir-1269 | DTL          | 0.466742451 mirna_pc |
| 11055 hsa-mir-1269 | Clorf112     | 0.380634153 mirna_pc |
| 11056 hsa-mir-1269 | KIAA0495     | 0.320250039 mirna_pc |
| 11057 hsa-mir-1269 | C16orf59     | 0.329679271 mirna_pc |
| 11058 hsa-mir-1269 | NEIL3        | 0.415128612 mirna_pc |
| 11059 hsa-mir-1269 | ZNF528       | 0.338143994 mirna_pc |
| 11060 hsa-mir-1269 | NCAPD2       | 0.362053673 mirna_pc |
| 11061 hsa-mir-1269 | UCK2         | 0.340639661 mirna_pc |
| 11062 hsa-mir-1269 | FAM64A       | 0.3615154 mirna_pc   |
| 11063 hsa-mir-1269 | FUS          | 0.43825738 mirna_pc  |
| 11064 hsa-mir-1269 | CENPO        | 0.387940978 mirna_pc |
| 11065 hsa-mir-1269 | HMGB2        | 0.408104756 mirna_pc |
| 11066 hsa-mir-1269 | CACNB4       | 0.442632698 mirna_pc |
| 11067 hsa-mir-1269 | GINS2        | 0.310481386 mirna_pc |
| 11068 hsa-mir-1269 | RELL1        | 0.417532713 mirna_pc |
| 11069 hsa-mir-1269 | RNF150       | 0.342982844 mirna_pc |

|       |              |          |             |          |
|-------|--------------|----------|-------------|----------|
| 11070 | hsa-mir-1269 | C16orf75 | 0.337852807 | mirna_pc |
| 11071 | hsa-mir-1269 | TMEM108  | 0.413119155 | mirna_pc |
| 11072 | hsa-mir-1269 | GPRASP2  | 0.448617921 | mirna_pc |
| 11073 | hsa-mir-1269 | CENPH    | 0.453993932 | mirna_pc |
| 11074 | hsa-mir-1269 | MSH2     | 0.364817233 | mirna_pc |
| 11075 | hsa-mir-1269 | SF3B3    | 0.426804938 | mirna_pc |
| 11076 | hsa-mir-1269 | CLK4     | 0.317857285 | mirna_pc |
| 11077 | hsa-mir-1269 | RFC4     | 0.319867691 | mirna_pc |
| 11078 | hsa-mir-1269 | ZNF853   | 0.381423284 | mirna_pc |
| 11079 | hsa-mir-1269 | FBX05    | 0.334400063 | mirna_pc |
| 11080 | hsa-mir-1269 | H2AFZ    | 0.373743611 | mirna_pc |
| 11081 | hsa-mir-1269 | DDX12    | 0.428938131 | mirna_pc |
| 11082 | hsa-mir-1269 | AASS     | 0.324928027 | mirna_pc |
| 11083 | hsa-mir-1269 | FBXL7    | 0.352108152 | mirna_pc |
| 11084 | hsa-mir-1269 | ZNF880   | 0.429380595 | mirna_pc |
| 11085 | hsa-mir-1269 | ZNF649   | 0.352274917 | mirna_pc |
| 11086 | hsa-mir-1269 | PEX19    | 0.349348855 | mirna_pc |
| 11087 | hsa-mir-1269 | PSRC1    | 0.39390978  | mirna_pc |
| 11088 | hsa-mir-1269 | NAP1L5   | 0.324818352 | mirna_pc |
| 11089 | hsa-mir-1269 | ZNF423   | 0.381951661 | mirna_pc |
| 11090 | hsa-mir-1269 | PRCC     | 0.32993416  | mirna_pc |
| 11091 | hsa-mir-1269 | SSBP3    | 0.498830963 | mirna_pc |
| 11092 | hsa-mir-1269 | C20orf72 | 0.381883476 | mirna_pc |
| 11093 | hsa-mir-1269 | GPR19    | 0.494683735 | mirna_pc |
| 11094 | hsa-mir-1269 | GABPB1   | 0.331081774 | mirna_pc |
| 11095 | hsa-mir-1269 | PPAT     | 0.302501568 | mirna_pc |
| 11096 | hsa-mir-1269 | CCDC138  | 0.312711222 | mirna_pc |
| 11097 | hsa-mir-1269 | HOXD9    | 0.353192916 | mirna_pc |
| 11098 | hsa-mir-1269 | MAP9     | 0.414429692 | mirna_pc |
| 11099 | hsa-mir-1269 | C4orf46  | 0.433127197 | mirna_pc |
| 11100 | hsa-mir-1269 | PCDHGB6  | 0.418792745 | mirna_pc |
| 11101 | hsa-mir-1269 | KHDRBS1  | 0.365860809 | mirna_pc |
| 11102 | hsa-mir-1269 | TUB      | 0.503144736 | mirna_pc |
| 11103 | hsa-mir-1269 | MTL 5.00 | 0.528334171 | mirna_pc |
| 11104 | hsa-mir-1269 | PARP1    | 0.374648195 | mirna_pc |
| 11105 | hsa-mir-1269 | TSHZ2    | 0.401438008 | mirna_pc |
| 11106 | hsa-mir-1269 | C4orf21  | 0.484342301 | mirna_pc |
| 11107 | hsa-mir-1269 | SARDH    | 0.31164648  | mirna_pc |
| 11108 | hsa-mir-1269 | TMEM194A | 0.364707988 | mirna_pc |
| 11109 | hsa-mir-1269 | FGFR1    | 0.50536589  | mirna_pc |
| 11110 | hsa-mir-1269 | SLC39A10 | 0.491107328 | mirna_pc |
| 11111 | hsa-mir-1269 | IL4I1    | 0.439734859 | mirna_pc |
| 11112 | hsa-mir-1269 | NEDD1    | 0.323574837 | mirna_pc |
| 11113 | hsa-mir-1269 | PAPSS1   | 0.521745753 | mirna_pc |
| 11114 | hsa-mir-1269 | L3MBTL4  | 0.321152226 | mirna_pc |
| 11115 | hsa-mir-1269 | CEP135   | 0.389370415 | mirna_pc |
| 11116 | hsa-mir-1269 | ROR2     | 0.326550675 | mirna_pc |
| 11117 | hsa-mir-1269 | NASP     | 0.333657511 | mirna_pc |
| 11118 | hsa-mir-1269 | FLJ39653 | 0.321844353 | mirna_pc |
| 11119 | hsa-mir-1269 | BCL2     | 0.447066034 | mirna_pc |
| 11120 | hsa-mir-1269 | TMX4     | 0.398193838 | mirna_pc |
| 11121 | hsa-mir-1269 | SLC4A11  | 0.386696022 | mirna_pc |
| 11122 | hsa-mir-1269 | CPE      | 0.3238287   | mirna_pc |
| 11123 | hsa-mir-1269 | C11orf84 | 0.33834802  | mirna_pc |

|                    |          |                      |
|--------------------|----------|----------------------|
| 11124 hsa-mir-1269 | LARP6    | 0.336160859 mirna_pc |
| 11125 hsa-mir-1269 | DCHS2    | 0.336805838 mirna_pc |
| 11126 hsa-mir-1269 | HOXA9    | 0.500512964 mirna_pc |
| 11127 hsa-mir-1269 | GORAB    | 0.43005911 mirna_pc  |
| 11128 hsa-mir-1269 | FANCL    | 0.34404003 mirna_pc  |
| 11129 hsa-mir-1269 | HNRNPd   | 0.47087867 mirna_pc  |
| 11130 hsa-mir-1269 | WDR19    | 0.596949879 mirna_pc |
| 11131 hsa-mir-1269 | SHOX2    | 0.505178816 mirna_pc |
| 11132 hsa-mir-1269 | PHC1     | 0.384839057 mirna_pc |
| 11133 hsa-mir-1269 | C4orf41  | 0.36545937 mirna_pc  |
| 11134 hsa-mir-1269 | PDZD2    | 0.323868223 mirna_pc |
| 11135 hsa-mir-1269 | PBX1     | 0.311453986 mirna_pc |
| 11136 hsa-mir-1269 | PMAIP1   | 0.344824482 mirna_pc |
| 11137 hsa-mir-1269 | LNx1     | 0.393837715 mirna_pc |
| 11138 hsa-mir-1269 | UBAP2L   | 0.41797653 mirna_pc  |
| 11139 hsa-mir-1269 | RPGRIP1L | 0.335298214 mirna_pc |
| 11140 hsa-mir-1269 | TGFA     | 0.467463272 mirna_pc |
| 11141 hsa-mir-1269 | C10orf72 | 0.426593666 mirna_pc |
| 11142 hsa-mir-1269 | LSM 6.00 | 0.31214137 mirna_pc  |
| 11143 hsa-mir-1269 | PARM1    | 0.422249114 mirna_pc |
| 11144 hsa-mir-1269 | FUBP1    | 0.33528581 mirna_pc  |
| 11145 hsa-mir-1269 | S100B    | 0.563682613 mirna_pc |
| 11146 hsa-mir-1269 | B3GALNT1 | 0.319678777 mirna_pc |
| 11147 hsa-mir-1269 | IPO9     | 0.404968943 mirna_pc |
| 11148 hsa-mir-1269 | TRA2B    | 0.358529629 mirna_pc |
| 11149 hsa-mir-1269 | RBPJ     | 0.496497007 mirna_pc |
| 11150 hsa-mir-1269 | GAR1     | 0.302775195 mirna_pc |
| 11151 hsa-mir-1269 | CDRT4    | 0.438878007 mirna_pc |
| 11152 hsa-mir-1269 | C3orf21  | 0.390525373 mirna_pc |
| 11153 hsa-mir-1269 | MAGEE1   | 0.302902736 mirna_pc |
| 11154 hsa-mir-1269 | CPXM1    | 0.603460486 mirna_pc |
| 11155 hsa-mir-1269 | WHSC1    | 0.433434773 mirna_pc |
| 11156 hsa-mir-1269 | ZNF141   | 0.412658364 mirna_pc |
| 11157 hsa-mir-1269 | BCL2A1   | 0.364478378 mirna_pc |
| 11158 hsa-mir-1269 | ENOPH1   | 0.310791991 mirna_pc |
| 11159 hsa-mir-1269 | NFIB     | 0.37239865 mirna_pc  |
| 11160 hsa-mir-1269 | CHI3L1   | 0.30372919 mirna_pc  |
| 11161 hsa-mir-1269 | RAD17    | 0.332190978 mirna_pc |
| 11162 hsa-mir-1269 | METTL14  | 0.374542609 mirna_pc |
| 11163 hsa-mir-1269 | C16orf80 | 0.302954735 mirna_pc |
| 11164 hsa-mir-1269 | PLEKHG4  | 0.328600181 mirna_pc |
| 11165 hsa-mir-1269 | ITFG2    | 0.307744679 mirna_pc |
| 11166 hsa-mir-1269 | SFPQ     | 0.339663498 mirna_pc |
| 11167 hsa-mir-1269 | CD83     | 0.482380183 mirna_pc |
| 11168 hsa-mir-1269 | FAM125B  | 0.404214747 mirna_pc |
| 11169 hsa-mir-1269 | TMEM150C | 0.363668701 mirna_pc |
| 11170 hsa-mir-1269 | LRPAP1   | 0.35198787 mirna_pc  |
| 11171 hsa-mir-1269 | CADM1    | 0.50756855 mirna_pc  |
| 11172 hsa-mir-1269 | TLL1     | 0.396137639 mirna_pc |
| 11173 hsa-mir-1269 | POGK     | 0.389914326 mirna_pc |
| 11174 hsa-mir-1269 | CPAMD8   | 0.593352295 mirna_pc |
| 11175 hsa-mir-1269 | IGSF10   | 0.375410068 mirna_pc |
| 11176 hsa-mir-1269 | SALL2    | 0.352511856 mirna_pc |
| 11177 hsa-mir-1269 | MOBK1A   | 0.361020109 mirna_pc |

|                    |           |                      |
|--------------------|-----------|----------------------|
| 11178 hsa-mir-1269 | MSH6      | 0.362550493 mirna_pc |
| 11179 hsa-mir-1269 | HOXD11    | 0.317753044 mirna_pc |
| 11180 hsa-mir-1269 | TP73      | 0.441881616 mirna_pc |
| 11181 hsa-mir-1269 | LEF1      | 0.605445711 mirna_pc |
| 11182 hsa-mir-1269 | FAM161A   | 0.338733606 mirna_pc |
| 11183 hsa-mir-1269 | FAM193A   | 0.469031665 mirna_pc |
| 11184 hsa-mir-1269 | KREMEN2   | 0.639221044 mirna_pc |
| 11185 hsa-mir-1269 | MEX3A     | 0.556823004 mirna_pc |
| 11186 hsa-mir-1269 | FAM117A   | 0.325117941 mirna_pc |
| 11187 hsa-mir-1269 | TBC1D19   | 0.337470313 mirna_pc |
| 11188 hsa-mir-1269 | NGFR      | 0.566897612 mirna_pc |
| 11189 hsa-mir-1269 | PDCD11    | 0.337579309 mirna_pc |
| 11190 hsa-mir-1269 | IRAK1BP1  | 0.39816895 mirna_pc  |
| 11191 hsa-mir-1269 | CCDC74A   | 0.328020431 mirna_pc |
| 11192 hsa-mir-1269 | CCDC74B   | 0.364973836 mirna_pc |
| 11193 hsa-mir-1269 | LRRN1     | 0.437423532 mirna_pc |
| 11194 hsa-mir-1269 | TIFA      | 0.486709092 mirna_pc |
| 11195 hsa-mir-1269 | CCDC28B   | 0.380116037 mirna_pc |
| 11196 hsa-mir-1269 | UNC119B   | 0.346466632 mirna_pc |
| 11197 hsa-mir-1269 | CDKL3     | 0.545586396 mirna_pc |
| 11198 hsa-mir-1269 | EMILIN3   | 0.425286653 mirna_pc |
| 11199 hsa-mir-1269 | MCTP2     | 0.607430343 mirna_pc |
| 11200 hsa-mir-1269 | ARL 3.00  | 0.365203327 mirna_pc |
| 11201 hsa-mir-1269 | LOC642846 | 0.449174165 mirna_pc |
| 11202 hsa-mir-1269 | TGIF2     | 0.482263978 mirna_pc |
| 11203 hsa-mir-1269 | RCN2      | 0.350158635 mirna_pc |
| 11204 hsa-mir-1269 | POU6F2    | 0.351109131 mirna_pc |
| 11205 hsa-mir-1269 | ALDH9A1   | 0.414995169 mirna_pc |
| 11206 hsa-mir-1269 | C9orf91   | 0.302375939 mirna_pc |
| 11207 hsa-mir-1269 | RCOR3     | 0.312506468 mirna_pc |
| 11208 hsa-mir-1269 | EBF4      | 0.357469416 mirna_pc |
| 11209 hsa-mir-1269 | TMTC1     | 0.307360161 mirna_pc |
| 11210 hsa-mir-1269 | EXOSC9    | 0.405516617 mirna_pc |
| 11211 hsa-mir-1269 | LYST      | 0.446425235 mirna_pc |
| 11212 hsa-mir-1269 | RBMX      | 0.306306857 mirna_pc |
| 11213 hsa-mir-1269 | NBPF3     | 0.311286142 mirna_pc |
| 11214 hsa-mir-1269 | GEM       | 0.305240316 mirna_pc |
| 11215 hsa-mir-1269 | PTBP2     | 0.333304733 mirna_pc |
| 11216 hsa-mir-1269 | LOC374443 | 0.358052899 mirna_pc |
| 11217 hsa-mir-1269 | KIAA1614  | 0.653918982 mirna_pc |
| 11218 hsa-mir-1269 | TWIST1    | 0.406101904 mirna_pc |
| 11219 hsa-mir-1269 | MORN4     | 0.506995823 mirna_pc |
| 11220 hsa-mir-1269 | CLK2      | 0.441019634 mirna_pc |
| 11221 hsa-mir-1269 | RPL39L    | 0.352986778 mirna_pc |
| 11222 hsa-mir-1269 | ASB3      | 0.483125434 mirna_pc |
| 11223 hsa-mir-1269 | IGSF9     | 0.59823825 mirna_pc  |
| 11224 hsa-mir-1269 | FIP1L1    | 0.345235284 mirna_pc |
| 11225 hsa-mir-1269 | GTF3C3    | 0.341412727 mirna_pc |
| 11226 hsa-mir-1269 | CIT       | 0.340808004 mirna_pc |
| 11227 hsa-mir-1269 | SCLT1     | 0.371247571 mirna_pc |
| 11228 hsa-mir-1269 | MRFAP1    | 0.424731355 mirna_pc |
| 11229 hsa-mir-1269 | NKD2      | 0.358822163 mirna_pc |
| 11230 hsa-mir-1269 | FRMD4A    | 0.374822629 mirna_pc |
| 11231 hsa-mir-1269 | RWDD4A    | 0.352280395 mirna_pc |

|                    |           |                      |
|--------------------|-----------|----------------------|
| 11232 hsa-mir-1269 | MYB       | 0.323472941 mirna_pc |
| 11233 hsa-mir-1269 | ITPRIPL1  | 0.442321034 mirna_pc |
| 11234 hsa-mir-1269 | TTLL4     | 0.516254048 mirna_pc |
| 11235 hsa-mir-1269 | CYP24A1   | 0.591148137 mirna_pc |
| 11236 hsa-mir-1269 | FGD5      | 0.412345006 mirna_pc |
| 11237 hsa-mir-1269 | BBS5      | 0.33134494 mirna_pc  |
| 11238 hsa-mir-1269 | EMILIN1   | 0.404678062 mirna_pc |
| 11239 hsa-mir-1269 | RFC1      | 0.521331331 mirna_pc |
| 11240 hsa-mir-1269 | ATN1      | 0.443771089 mirna_pc |
| 11241 hsa-mir-1269 | ANKRD6    | 0.511642026 mirna_pc |
| 11242 hsa-mir-1269 | KIAA0090  | 0.301867318 mirna_pc |
| 11243 hsa-mir-1269 | LPHN3     | 0.30870428 mirna_pc  |
| 11244 hsa-mir-1269 | LOC645676 | 0.345827252 mirna_pc |
| 11245 hsa-mir-1269 | BCL7A     | 0.317361085 mirna_pc |
| 11246 hsa-mir-1269 | NID1      | 0.318716047 mirna_pc |
| 11247 hsa-mir-1269 | GGT7      | 0.350184812 mirna_pc |
| 11248 hsa-mir-1269 | WNT10A    | 0.447958877 mirna_pc |
| 11249 hsa-mir-1269 | LAMA1     | 0.328642122 mirna_pc |
| 11250 hsa-mir-1269 | FLJ10357  | 0.338027519 mirna_pc |
| 11251 hsa-mir-1269 | TRPA1     | 0.517289723 mirna_pc |
| 11252 hsa-mir-1269 | CRISPLD1  | 0.367006456 mirna_pc |
| 11253 hsa-mir-1269 | ZBTB49    | 0.489770222 mirna_pc |
| 11254 hsa-mir-1269 | PALM2     | 0.339909988 mirna_pc |
| 11255 hsa-mir-1269 | ARNT2     | 0.474677877 mirna_pc |
| 11256 hsa-mir-1269 | ARHGAP19  | 0.307698355 mirna_pc |
| 11257 hsa-mir-1269 | ZNF286A   | 0.517676492 mirna_pc |
| 11258 hsa-mir-1269 | KIAA0922  | 0.538262963 mirna_pc |
| 11259 hsa-mir-1269 | AHDC1     | 0.364682384 mirna_pc |
| 11260 hsa-mir-1269 | MRPL21    | 0.401016174 mirna_pc |
| 11261 hsa-mir-1269 | RASSF8    | 0.369355787 mirna_pc |
| 11262 hsa-mir-1269 | FBX036    | 0.335231489 mirna_pc |
| 11263 hsa-mir-1269 | ZNF362    | 0.325631829 mirna_pc |
| 11264 hsa-mir-1269 | DMRTA2    | 0.395695769 mirna_pc |
| 11265 hsa-mir-1269 | ARID1B    | 0.333885846 mirna_pc |
| 11266 hsa-mir-1269 | CHST10    | 0.376463298 mirna_pc |
| 11267 hsa-mir-1269 | PPP1R14C  | 0.40980317 mirna_pc  |
| 11268 hsa-mir-1269 | SUSD5     | 0.475221267 mirna_pc |
| 11269 hsa-mir-1269 | ALS2CR4   | 0.344222478 mirna_pc |
| 11270 hsa-mir-1269 | CUEDC2    | 0.331881328 mirna_pc |
| 11271 hsa-mir-1269 | TTN       | 0.385028984 mirna_pc |
| 11272 hsa-mir-1269 | TBX5      | 0.528315098 mirna_pc |
| 11273 hsa-mir-1269 | EVC2      | 0.57496554 mirna_pc  |
| 11274 hsa-mir-1269 | PRR3      | 0.447512764 mirna_pc |
| 11275 hsa-mir-1269 | SPATA5    | 0.301834276 mirna_pc |
| 11276 hsa-mir-1269 | FAM200B   | 0.446377207 mirna_pc |
| 11277 hsa-mir-1269 | RAB28     | 0.534377032 mirna_pc |
| 11278 hsa-mir-1269 | LRRTM2    | 0.432808316 mirna_pc |
| 11279 hsa-mir-1269 | COPS4     | 0.300450587 mirna_pc |
| 11280 hsa-mir-1269 | ALDH7A1   | 0.304879287 mirna_pc |
| 11281 hsa-mir-1269 | ORA12     | 0.309328422 mirna_pc |
| 11282 hsa-mir-1269 | SEMA4F    | 0.486481367 mirna_pc |
| 11283 hsa-mir-1269 | ZNF286B   | 0.370098901 mirna_pc |
| 11284 hsa-mir-1269 | IFT80     | 0.309195904 mirna_pc |
| 11285 hsa-mir-1269 | NLGN4Y    | 0.334763861 mirna_pc |

|       |              |           |             |          |
|-------|--------------|-----------|-------------|----------|
| 11286 | hsa-mir-1269 | MRFAP1L1  | 0.509203544 | mirna_pc |
| 11287 | hsa-mir-1269 | PKIA      | 0.418200494 | mirna_pc |
| 11288 | hsa-mir-1269 | ZNF599    | 0.397516774 | mirna_pc |
| 11289 | hsa-mir-1269 | GPR3      | 0.474661806 | mirna_pc |
| 11290 | hsa-mir-1269 | E2F6      | 0.386437157 | mirna_pc |
| 11291 | hsa-mir-1269 | KIAA1755  | 0.434336926 | mirna_pc |
| 11292 | hsa-mir-1269 | HUNK      | 0.521328524 | mirna_pc |
| 11293 | hsa-mir-1269 | SCLY      | 0.618589025 | mirna_pc |
| 11294 | hsa-mir-1269 | GPR125    | 0.547785739 | mirna_pc |
| 11295 | hsa-mir-1269 | SLC44A5   | 0.302672759 | mirna_pc |
| 11296 | hsa-mir-1269 | ADH5      | 0.317358422 | mirna_pc |
| 11297 | hsa-mir-1269 | LDLRAD3   | 0.517822563 | mirna_pc |
| 11298 | hsa-mir-1269 | DHRS13    | 0.373953615 | mirna_pc |
| 11299 | hsa-mir-1269 | TFAP2C    | 0.497144992 | mirna_pc |
| 11300 | hsa-mir-1269 | DHX57     | 0.401004255 | mirna_pc |
| 11301 | hsa-mir-1269 | LPAR6     | 0.323249329 | mirna_pc |
| 11302 | hsa-mir-1269 | NUMA1     | 0.488078619 | mirna_pc |
| 11303 | hsa-mir-1269 | ALX3      | 0.613869613 | mirna_pc |
| 11304 | hsa-mir-1269 | C5orf36   | 0.33882086  | mirna_pc |
| 11305 | hsa-mir-1269 | CHST14    | 0.414063842 | mirna_pc |
| 11306 | hsa-mir-1269 | CLSTN3    | 0.308288629 | mirna_pc |
| 11307 | hsa-mir-1269 | SFT2D3    | 0.355140782 | mirna_pc |
| 11308 | hsa-mir-1269 | DPY19L2P2 | 0.367794364 | mirna_pc |
| 11309 | hsa-mir-1269 | CABLES2   | 0.313397939 | mirna_pc |
| 11310 | hsa-mir-1269 | WDR35     | 0.345097888 | mirna_pc |
| 11311 | hsa-mir-1269 | IFT140    | 0.33675226  | mirna_pc |
| 11312 | hsa-mir-1269 | TMEFF1    | 0.352378044 | mirna_pc |
| 11313 | hsa-mir-1269 | CBFA2T2   | 0.362917735 | mirna_pc |
| 11314 | hsa-mir-1269 | LZTS1     | 0.53964214  | mirna_pc |
| 11315 | hsa-mir-1269 | RBM8A     | 0.306983477 | mirna_pc |
| 11316 | hsa-mir-1269 | LRTOMT    | 0.326550623 | mirna_pc |
| 11317 | hsa-mir-1269 | GXYLT2    | 0.605147593 | mirna_pc |
| 11318 | hsa-mir-1269 | PADI2     | 0.503809635 | mirna_pc |
| 11319 | hsa-mir-1269 | BACH2     | 0.363659409 | mirna_pc |
| 11320 | hsa-mir-1269 | BAT2      | 0.320352815 | mirna_pc |
| 11321 | hsa-mir-1269 | FADS2     | 0.314833092 | mirna_pc |
| 11322 | hsa-mir-1269 | EDAR      | 0.747199722 | mirna_pc |
| 11323 | hsa-mir-1269 | IFT81     | 0.392479502 | mirna_pc |
| 11324 | hsa-mir-1269 | LOXL3     | 0.361717635 | mirna_pc |
| 11325 | hsa-mir-1269 | ZNF184    | 0.309672076 | mirna_pc |
| 11326 | hsa-mir-1269 | PITX2     | 0.38710607  | mirna_pc |
| 11327 | hsa-mir-1269 | ARHGEF19  | 0.440372208 | mirna_pc |
| 11328 | hsa-mir-1269 | DCTD      | 0.339247062 | mirna_pc |
| 11329 | hsa-mir-1269 | LRP4      | 0.363794653 | mirna_pc |
| 11330 | hsa-mir-1269 | CCND1     | 0.330880788 | mirna_pc |
| 11331 | hsa-mir-1269 | ZNF214    | 0.372994196 | mirna_pc |
| 11332 | hsa-mir-1269 | ANAPC4    | 0.324514122 | mirna_pc |
| 11333 | hsa-mir-1269 | NFATC3    | 0.314356681 | mirna_pc |
| 11334 | hsa-mir-1269 | TMEM128   | 0.433419306 | mirna_pc |
| 11335 | hsa-mir-1269 | ZNF771    | 0.413491766 | mirna_pc |
| 11336 | hsa-mir-1269 | PRUNE     | 0.300221261 | mirna_pc |
| 11337 | hsa-mir-1269 | TCTN2     | 0.525930828 | mirna_pc |
| 11338 | hsa-mir-1269 | BCAN      | 0.593196986 | mirna_pc |
| 11339 | hsa-mir-1269 | NPHP1     | 0.324495282 | mirna_pc |

|                    |           |                      |
|--------------------|-----------|----------------------|
| 11340 hsa-mir-1269 | DHX15     | 0.402797647 mirna_pc |
| 11341 hsa-mir-1269 | BBS9      | 0.300735676 mirna_pc |
| 11342 hsa-mir-1269 | LRP6      | 0.302456641 mirna_pc |
| 11343 hsa-mir-1269 | EXTL2     | 0.368719097 mirna_pc |
| 11344 hsa-mir-1269 | GNAS      | 0.311200282 mirna_pc |
| 11345 hsa-mir-1269 | DCP2      | 0.349743267 mirna_pc |
| 11346 hsa-mir-1269 | PRKD3     | 0.346916453 mirna_pc |
| 11347 hsa-mir-1269 | C2orf44   | 0.340884403 mirna_pc |
| 11348 hsa-mir-1269 | ACER3     | 0.441828225 mirna_pc |
| 11349 hsa-mir-1269 | LOC440173 | 0.429628861 mirna_pc |
| 11350 hsa-mir-1269 | SHISA2    | 0.574808237 mirna_pc |
| 11351 hsa-mir-1269 | CBX5      | 0.503631653 mirna_pc |
| 11352 hsa-mir-1269 | IFT172    | 0.458563766 mirna_pc |
| 11353 hsa-mir-1269 | ABI2      | 0.351678325 mirna_pc |
| 11354 hsa-mir-1269 | TBCK      | 0.393454323 mirna_pc |
| 11355 hsa-mir-1269 | C2orf81   | 0.37025581 mirna_pc  |
| 11356 hsa-mir-1269 | TMEM9     | 0.397899865 mirna_pc |
| 11357 hsa-mir-1269 | TMEM121   | 0.301934213 mirna_pc |
| 11358 hsa-mir-1269 | AGBL5     | 0.453354662 mirna_pc |
| 11359 hsa-mir-1269 | PUM2      | 0.316050596 mirna_pc |
| 11360 hsa-mir-1269 | VASH2     | 0.697633288 mirna_pc |
| 11361 hsa-mir-1269 | NAV2      | 0.414105733 mirna_pc |
| 11362 hsa-mir-1269 | MYL6B     | 0.412119473 mirna_pc |
| 11363 hsa-mir-1269 | SH3TC1    | 0.566579102 mirna_pc |
| 11364 hsa-mir-1269 | ERCC8     | 0.358776352 mirna_pc |
| 11365 hsa-mir-1269 | DTX3      | 0.320322647 mirna_pc |
| 11366 hsa-mir-1269 | CD200     | 0.55191451 mirna_pc  |
| 11367 hsa-mir-1269 | MED28     | 0.563132224 mirna_pc |
| 11368 hsa-mir-1269 | MATR3     | 0.378696494 mirna_pc |
| 11369 hsa-mir-1269 | CPT1C     | 0.505100997 mirna_pc |
| 11370 hsa-mir-1269 | UNKL      | 0.355217744 mirna_pc |
| 11371 hsa-mir-1269 | GPX7      | 0.419713246 mirna_pc |
| 11372 hsa-mir-1269 | PAN2      | 0.324352522 mirna_pc |
| 11373 hsa-mir-1269 | ZNF518B   | 0.442285951 mirna_pc |
| 11374 hsa-mir-1269 | CHST11    | 0.700192741 mirna_pc |
| 11375 hsa-mir-1269 | BCL11A    | 0.499204484 mirna_pc |
| 11376 hsa-mir-1269 | FBX017    | 0.415779933 mirna_pc |
| 11377 hsa-mir-1269 | C4orf27   | 0.371316703 mirna_pc |
| 11378 hsa-mir-1269 | SIX5      | 0.334344834 mirna_pc |
| 11379 hsa-mir-1269 | IRX4      | 0.320983169 mirna_pc |
| 11380 hsa-mir-1269 | C11orf49  | 0.340514369 mirna_pc |
| 11381 hsa-mir-1269 | USP21     | 0.515075796 mirna_pc |
| 11382 hsa-mir-1269 | L3MBTL    | 0.379105383 mirna_pc |
| 11383 hsa-mir-1269 | TRAF3IP3  | 0.440330838 mirna_pc |
| 11384 hsa-mir-1269 | ZCCHC4    | 0.389211923 mirna_pc |
| 11385 hsa-mir-1269 | MARVELD1  | 0.345872859 mirna_pc |
| 11386 hsa-mir-1269 | LOC284023 | 0.306081946 mirna_pc |
| 11387 hsa-mir-1269 | RNF121    | 0.317580292 mirna_pc |
| 11388 hsa-mir-1269 | EMID1     | 0.692350886 mirna_pc |
| 11389 hsa-mir-1269 | ZNF521    | 0.560464934 mirna_pc |
| 11390 hsa-mir-1269 | ZMYM4     | 0.303010269 mirna_pc |
| 11391 hsa-mir-1269 | PRKAR1B   | 0.358104204 mirna_pc |
| 11392 hsa-mir-1269 | LMAN2L    | 0.433814177 mirna_pc |
| 11393 hsa-mir-1269 | TROVE2    | 0.336645641 mirna_pc |

|                    |          |                      |
|--------------------|----------|----------------------|
| 11394 hsa-mir-1269 | TCF7L1   | 0.558570683 mirna_pc |
| 11395 hsa-mir-1269 | ENTPD6   | 0.327484604 mirna_pc |
| 11396 hsa-mir-1269 | MOXD1    | 0.643251151 mirna_pc |
| 11397 hsa-mir-1269 | THAP9    | 0.429869339 mirna_pc |
| 11398 hsa-mir-1269 | HNRNPH3  | 0.390801326 mirna_pc |
| 11399 hsa-mir-1269 | COL8A2   | 0.352046035 mirna_pc |
| 11400 hsa-mir-1269 | RABL2A   | 0.343098454 mirna_pc |
| 11401 hsa-mir-1269 | APBA2    | 0.301808593 mirna_pc |
| 11402 hsa-mir-1269 | SH3RF3   | 0.627839561 mirna_pc |
| 11403 hsa-mir-1269 | NSL1     | 0.485897483 mirna_pc |
| 11404 hsa-mir-1269 | KIF3A    | 0.302324112 mirna_pc |
| 11405 hsa-mir-1269 | CNIH2    | 0.473506914 mirna_pc |
| 11406 hsa-mir-1269 | CHST15   | 0.407923432 mirna_pc |
| 11407 hsa-mir-1269 | IQCC     | 0.39553732 mirna_pc  |
| 11408 hsa-mir-1269 | HHAT     | 0.334609615 mirna_pc |
| 11409 hsa-mir-1269 | GATAD2B  | 0.490839121 mirna_pc |
| 11410 hsa-mir-1269 | SNAP47   | 0.311018068 mirna_pc |
| 11411 hsa-mir-1269 | BMP7     | 0.430304701 mirna_pc |
| 11412 hsa-mir-1269 | LOC93622 | 0.368399176 mirna_pc |
| 11413 hsa-mir-1269 | MLLT11   | 0.40684338 mirna_pc  |
| 11414 hsa-mir-1269 | TTY15    | 0.376434676 mirna_pc |
| 11415 hsa-mir-1269 | QRICH2   | 0.444281721 mirna_pc |
| 11416 hsa-mir-1269 | ATG10    | 0.362757981 mirna_pc |
| 11417 hsa-mir-1269 | MYCN     | 0.528857897 mirna_pc |
| 11418 hsa-mir-1269 | EFCAB7   | 0.345718035 mirna_pc |
| 11419 hsa-mir-1269 | DCAF16   | 0.452307061 mirna_pc |
| 11420 hsa-mir-1269 | CCDC102A | 0.400659891 mirna_pc |
| 11421 hsa-mir-1269 | SBK1     | 0.449142024 mirna_pc |
| 11422 hsa-mir-1269 | NINL     | 0.300552422 mirna_pc |
| 11423 hsa-mir-1269 | PABPC4L  | 0.591625766 mirna_pc |
| 11424 hsa-mir-1269 | ABCA11P  | 0.396290901 mirna_pc |
| 11425 hsa-mir-1269 | PMF1     | 0.31953072 mirna_pc  |
| 11426 hsa-mir-1269 | C19orf44 | 0.345877537 mirna_pc |
| 11427 hsa-mir-1269 | USP13    | 0.384709243 mirna_pc |
| 11428 hsa-mir-1269 | GALNT14  | 0.351169597 mirna_pc |
| 11429 hsa-mir-1269 | VPS45    | 0.334077442 mirna_pc |
| 11430 hsa-mir-1269 | HAUS3    | 0.385914948 mirna_pc |
| 11431 hsa-mir-1269 | ZNF93    | 0.33442369 mirna_pc  |
| 11432 hsa-mir-1269 | CD69     | 0.483069724 mirna_pc |
| 11433 hsa-mir-1269 | C16orf46 | 0.586211365 mirna_pc |
| 11434 hsa-mir-1269 | CLPB     | 0.332850224 mirna_pc |
| 11435 hsa-mir-1269 | TRAF1    | 0.49841416 mirna_pc  |
| 11436 hsa-mir-1269 | ZC3H11A  | 0.36640661 mirna_pc  |
| 11437 hsa-mir-1269 | SERTAD4  | 0.377301806 mirna_pc |
| 11438 hsa-mir-1269 | SCAI     | 0.385689978 mirna_pc |
| 11439 hsa-mir-1269 | N4BP2    | 0.363972185 mirna_pc |
| 11440 hsa-mir-1269 | TRO      | 0.577641609 mirna_pc |
| 11441 hsa-mir-1269 | PACRGL   | 0.529865406 mirna_pc |
| 11442 hsa-mir-1269 | C6orf48  | 0.327842705 mirna_pc |
| 11443 hsa-mir-1269 | LAMC1    | 0.42790852 mirna_pc  |
| 11444 hsa-mir-1269 | PBX2     | 0.311487904 mirna_pc |
| 11445 hsa-mir-1269 | ZNF232   | 0.437142308 mirna_pc |
| 11446 hsa-mir-1269 | ZBTB39   | 0.301697539 mirna_pc |
| 11447 hsa-mir-1269 | NRCAM    | 0.392017705 mirna_pc |



|                    |          |                      |
|--------------------|----------|----------------------|
| 11448 hsa-mir-1269 | LYSMD1   | 0.313641896 mirna_pc |
| 11449 hsa-mir-1269 | KAL1     | 0.314842374 mirna_pc |
| 11450 hsa-mir-1269 | RPS10P7  | 0.309562204 mirna_pc |
| 11451 hsa-mir-1269 | ZNF827   | 0.334933869 mirna_pc |
| 11452 hsa-mir-1269 | C20orf12 | 0.527731058 mirna_pc |
| 11453 hsa-mir-1269 | ZBTB24   | 0.305904626 mirna_pc |
| 11454 hsa-mir-1269 | RBBP4    | 0.498011959 mirna_pc |
| 11455 hsa-mir-1269 | ODZ3     | 0.473589821 mirna_pc |
| 11456 hsa-mir-1269 | ENTPD2   | 0.444815956 mirna_pc |
| 11457 hsa-mir-1269 | RGS12    | 0.561661809 mirna_pc |
| 11458 hsa-mir-1269 | ZNF618   | 0.353507161 mirna_pc |
| 11459 hsa-mir-1269 | GEMIN8P4 | 0.329891548 mirna_pc |
| 11460 hsa-mir-1269 | BRSK1    | 0.407887265 mirna_pc |
| 11461 hsa-mir-1269 | CCDC111  | 0.365689422 mirna_pc |
| 11462 hsa-mir-1269 | ZNF713   | 0.460790283 mirna_pc |
| 11463 hsa-mir-1269 | TIA1     | 0.339782608 mirna_pc |
| 11464 hsa-mir-1269 | FAM65C   | 0.328679671 mirna_pc |
| 11465 hsa-mir-1269 | NAP1L4   | 0.340379776 mirna_pc |
| 11466 hsa-mir-1269 | LRDD     | 0.444546918 mirna_pc |
| 11467 hsa-mir-1269 | CCDC157  | 0.430774762 mirna_pc |
| 11468 hsa-mir-1269 | PDGFA    | 0.425498174 mirna_pc |
| 11469 hsa-mir-1269 | MYH10    | 0.313102698 mirna_pc |
| 11470 hsa-mir-1269 | SIKE1    | 0.31486547 mirna_pc  |
| 11471 hsa-mir-1269 | B4GALT5  | 0.310485417 mirna_pc |
| 11472 hsa-mir-1269 | SEMA4A   | 0.402930292 mirna_pc |
| 11473 hsa-mir-1269 | HSF2     | 0.376263247 mirna_pc |
| 11474 hsa-mir-1269 | COL9A2   | 0.481607923 mirna_pc |
| 11475 hsa-mir-1269 | MSTO2P   | 0.383036083 mirna_pc |
| 11476 hsa-mir-1269 | ETV5     | 0.58833725 mirna_pc  |
| 11477 hsa-mir-1269 | COL9A3   | 0.606881941 mirna_pc |
| 11478 hsa-mir-1269 | NUCKS1   | 0.433885393 mirna_pc |
| 11479 hsa-mir-1269 | TCTN1    | 0.395587862 mirna_pc |
| 11480 hsa-mir-1269 | AADAT    | 0.368110813 mirna_pc |
| 11481 hsa-mir-1269 | IGHMBP2  | 0.678152238 mirna_pc |
| 11482 hsa-mir-1269 | LGR6     | 0.646391143 mirna_pc |
| 11483 hsa-mir-1269 | ZFP90    | 0.341854925 mirna_pc |
| 11484 hsa-mir-1269 | ABTB2    | 0.420306893 mirna_pc |
| 11485 hsa-mir-1269 | PIGY     | 0.327663319 mirna_pc |
| 11486 hsa-mir-1269 | TUSC3    | 0.330891457 mirna_pc |
| 11487 hsa-mir-1269 | TANK     | 0.379809878 mirna_pc |
| 11488 hsa-mir-1269 | FZD1     | 0.500094809 mirna_pc |
| 11489 hsa-mir-1269 | SERF1A   | 0.305253593 mirna_pc |
| 11490 hsa-mir-1269 | B4GALNT4 | 0.373933944 mirna_pc |
| 11491 hsa-mir-1269 | AASDH    | 0.301961346 mirna_pc |
| 11492 hsa-mir-1269 | PDS5A    | 0.329163344 mirna_pc |
| 11493 hsa-mir-1269 | PDE4B    | 0.370769917 mirna_pc |
| 11494 hsa-mir-1269 | H2AFY2   | 0.387731381 mirna_pc |
| 11495 hsa-mir-1269 | BAI2     | 0.455030351 mirna_pc |
| 11496 hsa-mir-1269 | ZNF133   | 0.309004845 mirna_pc |
| 11497 hsa-mir-1269 | HEY2     | 0.388363164 mirna_pc |
| 11498 hsa-mir-1269 | TRIL     | 0.680848807 mirna_pc |
| 11499 hsa-mir-1269 | PCDH18   | 0.410411612 mirna_pc |
| 11500 hsa-mir-1269 | MTSS1L   | 0.339810301 mirna_pc |
| 11501 hsa-mir-1269 | EDC4     | 0.305045655 mirna_pc |

|                    |           |                      |
|--------------------|-----------|----------------------|
| 11502 hsa-mir-1269 | SMARCA1   | 0.303801966 mirna_pc |
| 11503 hsa-mir-1269 | SCHIP1    | 0.360733957 mirna_pc |
| 11504 hsa-mir-1269 | SV2A      | 0.496610174 mirna_pc |
| 11505 hsa-mir-1269 | NT5M      | 0.30294069 mirna_pc  |
| 11506 hsa-mir-1269 | SEMA4C    | 0.326972433 mirna_pc |
| 11507 hsa-mir-1269 | RPRD2     | 0.320423884 mirna_pc |
| 11508 hsa-mir-1269 | EFNB3     | 0.520088854 mirna_pc |
| 11509 hsa-mir-1269 | ZBED5     | 0.344719776 mirna_pc |
| 11510 hsa-mir-1269 | KIF7      | 0.337855175 mirna_pc |
| 11511 hsa-mir-1269 | VGLL4     | 0.383457829 mirna_pc |
| 11512 hsa-mir-1269 | VANGL2    | 0.306346263 mirna_pc |
| 11513 hsa-mir-1269 | DNMT3A    | 0.460902601 mirna_pc |
| 11514 hsa-mir-1269 | ZNF821    | 0.380934854 mirna_pc |
| 11515 hsa-mir-1269 | LOC348926 | 0.304212857 mirna_pc |
| 11516 hsa-mir-1269 | CALHM2    | 0.324440507 mirna_pc |
| 11517 hsa-mir-19a  | CENPF     | 0.302898563 mirna_pc |
| 11518 hsa-mir-19a  | RRM2      | 0.303216723 mirna_pc |
| 11519 hsa-mir-19a  | MYBL2     | 0.315896504 mirna_pc |
| 11520 hsa-mir-19a  | UBE2C     | 0.32773778 mirna_pc  |
| 11521 hsa-mir-19a  | BUB1      | 0.31931926 mirna_pc  |
| 11522 hsa-mir-19a  | BUB1B     | 0.349433578 mirna_pc |
| 11523 hsa-mir-19a  | HDGF      | 0.308555049 mirna_pc |
| 11524 hsa-mir-19a  | FANCA     | 0.388669206 mirna_pc |
| 11525 hsa-mir-19a  | CLSPN     | 0.328603172 mirna_pc |
| 11526 hsa-mir-19a  | SGOL1     | 0.342578449 mirna_pc |
| 11527 hsa-mir-19a  | ARHGAP11A | 0.334406867 mirna_pc |
| 11528 hsa-mir-19a  | CDC25B    | 0.363073186 mirna_pc |
| 11529 hsa-mir-19a  | FANCI     | 0.307442729 mirna_pc |
| 11530 hsa-mir-19a  | NEK2      | 0.345535075 mirna_pc |
| 11531 hsa-mir-19a  | HOXC11    | 0.314843988 mirna_pc |
| 11532 hsa-mir-19a  | GTSE1     | 0.343679878 mirna_pc |
| 11533 hsa-mir-19a  | RAD54L    | 0.305590631 mirna_pc |
| 11534 hsa-mir-19a  | MAD2L1    | 0.308452109 mirna_pc |
| 11535 hsa-mir-19a  | TIMELESS  | 0.307793485 mirna_pc |
| 11536 hsa-mir-19a  | CDCA8     | 0.30752225 mirna_pc  |
| 11537 hsa-mir-19a  | XPO1      | 0.344505278 mirna_pc |
| 11538 hsa-mir-19a  | KNTC1     | 0.330369832 mirna_pc |
| 11539 hsa-mir-19a  | NUF2      | 0.401654666 mirna_pc |
| 11540 hsa-mir-19a  | PLK4      | 0.367404552 mirna_pc |
| 11541 hsa-mir-19a  | KIF18A    | 0.321833795 mirna_pc |
| 11542 hsa-mir-19a  | DEPDC1    | 0.315488873 mirna_pc |
| 11543 hsa-mir-19a  | SKA3      | 0.422290451 mirna_pc |
| 11544 hsa-mir-19a  | KIF14     | 0.304321706 mirna_pc |
| 11545 hsa-mir-19a  | HJURP     | 0.334084197 mirna_pc |
| 11546 hsa-mir-19a  | SKA1      | 0.303019718 mirna_pc |
| 11547 hsa-mir-19a  | BLM       | 0.41027619 mirna_pc  |
| 11548 hsa-mir-19a  | CCDC150   | 0.360932857 mirna_pc |
| 11549 hsa-mir-19a  | DTL       | 0.324632625 mirna_pc |
| 11550 hsa-mir-19a  | CENPK     | 0.361050248 mirna_pc |
| 11551 hsa-mir-19a  | MCM10     | 0.313820875 mirna_pc |
| 11552 hsa-mir-19a  | SGOL2     | 0.354407448 mirna_pc |
| 11553 hsa-mir-19a  | KIF15     | 0.320448416 mirna_pc |
| 11554 hsa-mir-19a  | Clorf112  | 0.367457998 mirna_pc |
| 11555 hsa-mir-19a  | GINS1     | 0.318396216 mirna_pc |

|       |             |           |             |          |
|-------|-------------|-----------|-------------|----------|
| 11556 | hsa-mir-19a | TRAIP     | 0.316250195 | mirna_pc |
| 11557 | hsa-mir-19a | C12orf48  | 0.356737338 | mirna_pc |
| 11558 | hsa-mir-19a | HELLS     | 0.326298873 | mirna_pc |
| 11559 | hsa-mir-19a | CDCA7     | 0.354934061 | mirna_pc |
| 11560 | hsa-mir-19a | PIF1      | 0.310547952 | mirna_pc |
| 11561 | hsa-mir-19a | DCAF13    | 0.315180147 | mirna_pc |
| 11562 | hsa-mir-19a | FAM60A    | 0.331280049 | mirna_pc |
| 11563 | hsa-mir-19a | ATAD5     | 0.359398978 | mirna_pc |
| 11564 | hsa-mir-19a | KIF20B    | 0.334584883 | mirna_pc |
| 11565 | hsa-mir-19a | RFC3      | 0.378637731 | mirna_pc |
| 11566 | hsa-mir-19a | DEPDC1B   | 0.360758104 | mirna_pc |
| 11567 | hsa-mir-19a | CENPO     | 0.314027025 | mirna_pc |
| 11568 | hsa-mir-19a | XRCC2     | 0.321672439 | mirna_pc |
| 11569 | hsa-mir-19a | GEN1      | 0.377604427 | mirna_pc |
| 11570 | hsa-mir-19a | HMGB2     | 0.310873201 | mirna_pc |
| 11571 | hsa-mir-19a | DNA2      | 0.378801232 | mirna_pc |
| 11572 | hsa-mir-19a | NOP56     | 0.352688628 | mirna_pc |
| 11573 | hsa-mir-19a | CDK2      | 0.31293739  | mirna_pc |
| 11574 | hsa-mir-19a | DLEU2     | 0.341986436 | mirna_pc |
| 11575 | hsa-mir-19a | FERMT1    | 0.36302597  | mirna_pc |
| 11576 | hsa-mir-19a | DDX27     | 0.314098553 | mirna_pc |
| 11577 | hsa-mir-19a | MSH2      | 0.313107966 | mirna_pc |
| 11578 | hsa-mir-19a | CDC7      | 0.306679716 | mirna_pc |
| 11579 | hsa-mir-19a | SSB       | 0.392218271 | mirna_pc |
| 11580 | hsa-mir-19a | PUS1      | 0.365199695 | mirna_pc |
| 11581 | hsa-mir-19a | FBX05     | 0.340205755 | mirna_pc |
| 11582 | hsa-mir-19a | E2F3      | 0.449010635 | mirna_pc |
| 11583 | hsa-mir-19a | DDX11     | 0.326625967 | mirna_pc |
| 11584 | hsa-mir-19a | CDC25A    | 0.380877015 | mirna_pc |
| 11585 | hsa-mir-19a | DDX12     | 0.344733717 | mirna_pc |
| 11586 | hsa-mir-19a | C13orf34  | 0.445079941 | mirna_pc |
| 11587 | hsa-mir-19a | SRPK1     | 0.306598993 | mirna_pc |
| 11588 | hsa-mir-19a | MCM8      | 0.4323859   | mirna_pc |
| 11589 | hsa-mir-19a | PUS7      | 0.348538618 | mirna_pc |
| 11590 | hsa-mir-19a | NCL       | 0.319703665 | mirna_pc |
| 11591 | hsa-mir-19a | SASS6     | 0.341053428 | mirna_pc |
| 11592 | hsa-mir-19a | PSRC1     | 0.316351051 | mirna_pc |
| 11593 | hsa-mir-19a | DBF4B     | 0.321674311 | mirna_pc |
| 11594 | hsa-mir-19a | C13orf37  | 0.3519774   | mirna_pc |
| 11595 | hsa-mir-19a | PNPT1     | 0.381685944 | mirna_pc |
| 11596 | hsa-mir-19a | TMP0      | 0.314989253 | mirna_pc |
| 11597 | hsa-mir-19a | LOC388796 | 0.384873778 | mirna_pc |
| 11598 | hsa-mir-19a | GABPB1    | 0.375396011 | mirna_pc |
| 11599 | hsa-mir-19a | DHX9      | 0.301054    | mirna_pc |
| 11600 | hsa-mir-19a | CCDC138   | 0.324030098 | mirna_pc |
| 11601 | hsa-mir-19a | ETV4      | 0.324459692 | mirna_pc |
| 11602 | hsa-mir-19a | SFRS1     | 0.39283064  | mirna_pc |
| 11603 | hsa-mir-19a | WDR43     | 0.349697856 | mirna_pc |
| 11604 | hsa-mir-19a | HSPD1     | 0.400902005 | mirna_pc |
| 11605 | hsa-mir-19a | KHDRBS1   | 0.350178501 | mirna_pc |
| 11606 | hsa-mir-19a | PDIA4     | 0.320581098 | mirna_pc |
| 11607 | hsa-mir-19a | PRPF40A   | 0.329653828 | mirna_pc |
| 11608 | hsa-mir-19a | CCDC18    | 0.366495413 | mirna_pc |
| 11609 | hsa-mir-19a | DNAJC2    | 0.373946343 | mirna_pc |

|       |             |           |             |          |
|-------|-------------|-----------|-------------|----------|
| 11610 | hsa-mir-19a | SLC39A10  | 0.338513643 | mirna_pc |
| 11611 | hsa-mir-19a | ZNF695    | 0.408979128 | mirna_pc |
| 11612 | hsa-mir-19a | HAUS6     | 0.355790884 | mirna_pc |
| 11613 | hsa-mir-19a | CENPJ     | 0.327123236 | mirna_pc |
| 11614 | hsa-mir-19a | HNRNPU    | 0.332157802 | mirna_pc |
| 11615 | hsa-mir-19a | NASP      | 0.310827047 | mirna_pc |
| 11616 | hsa-mir-19a | SCARB1    | 0.307734001 | mirna_pc |
| 11617 | hsa-mir-19a | SUV39H2   | 0.354607462 | mirna_pc |
| 11618 | hsa-mir-19a | GTF2F2    | 0.309309012 | mirna_pc |
| 11619 | hsa-mir-19a | POP1      | 0.399711209 | mirna_pc |
| 11620 | hsa-mir-19a | NFE2L3    | 0.309326052 | mirna_pc |
| 11621 | hsa-mir-19a | KIAA0406  | 0.336274655 | mirna_pc |
| 11622 | hsa-mir-19a | HSP90B1   | 0.360680482 | mirna_pc |
| 11623 | hsa-mir-19a | NUDT15    | 0.310271755 | mirna_pc |
| 11624 | hsa-mir-19a | E2F4      | 0.319957365 | mirna_pc |
| 11625 | hsa-mir-19a | SLM02     | 0.390156021 | mirna_pc |
| 11626 | hsa-mir-19a | ATP13A3   | 0.317972585 | mirna_pc |
| 11627 | hsa-mir-19a | DHFR      | 0.315621825 | mirna_pc |
| 11628 | hsa-mir-19a | NAA25     | 0.343169561 | mirna_pc |
| 11629 | hsa-mir-19a | DEK       | 0.366163503 | mirna_pc |
| 11630 | hsa-mir-19a | TRIB3     | 0.389352668 | mirna_pc |
| 11631 | hsa-mir-19a | PASK      | 0.372745183 | mirna_pc |
| 11632 | hsa-mir-19a | ATP11A    | 0.306700607 | mirna_pc |
| 11633 | hsa-mir-19a | HEATR2    | 0.366894926 | mirna_pc |
| 11634 | hsa-mir-19a | RNF114    | 0.307261971 | mirna_pc |
| 11635 | hsa-mir-19a | CEP152    | 0.339852505 | mirna_pc |
| 11636 | hsa-mir-19a | PSMD12    | 0.307421606 | mirna_pc |
| 11637 | hsa-mir-19a | RNF219    | 0.466905186 | mirna_pc |
| 11638 | hsa-mir-19a | SLC25A32  | 0.389902563 | mirna_pc |
| 11639 | hsa-mir-19a | PABPC1L   | 0.305829827 | mirna_pc |
| 11640 | hsa-mir-19a | DDX55     | 0.346747193 | mirna_pc |
| 11641 | hsa-mir-19a | HPDL      | 0.315264914 | mirna_pc |
| 11642 | hsa-mir-19a | HDAC2     | 0.338244564 | mirna_pc |
| 11643 | hsa-mir-19a | XRN2      | 0.307331013 | mirna_pc |
| 11644 | hsa-mir-19a | KPNB1     | 0.352314644 | mirna_pc |
| 11645 | hsa-mir-19a | CASP3     | 0.310498919 | mirna_pc |
| 11646 | hsa-mir-19a | SMC3      | 0.392938331 | mirna_pc |
| 11647 | hsa-mir-19a | FLVCR1    | 0.336997438 | mirna_pc |
| 11648 | hsa-mir-19a | MEX3A     | 0.424665213 | mirna_pc |
| 11649 | hsa-mir-19a | BAT1      | 0.36804254  | mirna_pc |
| 11650 | hsa-mir-19a | LIPG      | 0.30084359  | mirna_pc |
| 11651 | hsa-mir-19a | MSH5      | 0.324612129 | mirna_pc |
| 11652 | hsa-mir-19a | ACAN      | 0.332577047 | mirna_pc |
| 11653 | hsa-mir-19a | TMC7      | 0.34675388  | mirna_pc |
| 11654 | hsa-mir-19a | SUZ12     | 0.301907701 | mirna_pc |
| 11655 | hsa-mir-19a | HMGB1     | 0.376729787 | mirna_pc |
| 11656 | hsa-mir-19a | DIAPH3    | 0.316051067 | mirna_pc |
| 11657 | hsa-mir-19a | LOC642846 | 0.311311799 | mirna_pc |
| 11658 | hsa-mir-19a | TGIF2     | 0.37098035  | mirna_pc |
| 11659 | hsa-mir-19a | FARSB     | 0.31173629  | mirna_pc |
| 11660 | hsa-mir-19a | PIK3AP1   | 0.316133581 | mirna_pc |
| 11661 | hsa-mir-19a | SC65      | 0.312208177 | mirna_pc |
| 11662 | hsa-mir-19a | MTF2      | 0.345682831 | mirna_pc |
| 11663 | hsa-mir-19a | POLE      | 0.36844988  | mirna_pc |

|                   |          |                      |
|-------------------|----------|----------------------|
| 11664 hsa-mir-19a | SOX9     | 0.394395055 mirna_pc |
| 11665 hsa-mir-19a | C13orf27 | 0.385912987 mirna_pc |
| 11666 hsa-mir-19a | GK3P     | 0.328714716 mirna_pc |
| 11667 hsa-mir-19a | RBMX     | 0.313786068 mirna_pc |
| 11668 hsa-mir-19a | NOC3L    | 0.302882369 mirna_pc |
| 11669 hsa-mir-19a | GPR180   | 0.359811718 mirna_pc |
| 11670 hsa-mir-19a | DAP3     | 0.326068642 mirna_pc |
| 11671 hsa-mir-19a | MDC 1.00 | 0.319734476 mirna_pc |
| 11672 hsa-mir-19a | EXOSC8   | 0.305717636 mirna_pc |
| 11673 hsa-mir-19a | TAF1D    | 0.327148016 mirna_pc |
| 11674 hsa-mir-19a | PDIA6    | 0.331466775 mirna_pc |
| 11675 hsa-mir-19a | LBR      | 0.341064436 mirna_pc |
| 11676 hsa-mir-19a | LTV1     | 0.32725926 mirna_pc  |
| 11677 hsa-mir-19a | GK       | 0.340022769 mirna_pc |
| 11678 hsa-mir-19a | FAM136A  | 0.358225675 mirna_pc |
| 11679 hsa-mir-19a | NRAS     | 0.41106544 mirna_pc  |
| 11680 hsa-mir-19a | GDPD5    | 0.339194527 mirna_pc |
| 11681 hsa-mir-19a | RBCK1    | 0.305368504 mirna_pc |
| 11682 hsa-mir-19a | GPATCH4  | 0.339438449 mirna_pc |
| 11683 hsa-mir-19a | SNORA8   | 0.452657386 mirna_pc |
| 11684 hsa-mir-19a | EML4     | 0.36181515 mirna_pc  |
| 11685 hsa-mir-19a | RPIA     | 0.382731861 mirna_pc |
| 11686 hsa-mir-19a | KIAA1731 | 0.328166028 mirna_pc |
| 11687 hsa-mir-19a | RBM28    | 0.374924493 mirna_pc |
| 11688 hsa-mir-19a | C13orf23 | 0.342455801 mirna_pc |
| 11689 hsa-mir-19a | SPATA2   | 0.354719846 mirna_pc |
| 11690 hsa-mir-19a | RBM12    | 0.337487419 mirna_pc |
| 11691 hsa-mir-19a | CHD7     | 0.345533427 mirna_pc |
| 11692 hsa-mir-19a | TOP 1.00 | 0.409180696 mirna_pc |
| 11693 hsa-mir-19a | TCERG1   | 0.364152619 mirna_pc |
| 11694 hsa-mir-19a | TOP1P1   | 0.332699079 mirna_pc |
| 11695 hsa-mir-19a | MAPKAPK5 | 0.31356066 mirna_pc  |
| 11696 hsa-mir-19a | E2F6     | 0.356555721 mirna_pc |
| 11697 hsa-mir-19a | ZNF833   | 0.304812519 mirna_pc |
| 11698 hsa-mir-19a | SLC25A15 | 0.30907109 mirna_pc  |
| 11699 hsa-mir-19a | SFRS13A  | 0.345118959 mirna_pc |
| 11700 hsa-mir-19a | SCLY     | 0.328875521 mirna_pc |
| 11701 hsa-mir-19a | TGDS     | 0.370997236 mirna_pc |
| 11702 hsa-mir-19a | TFAM     | 0.341931347 mirna_pc |
| 11703 hsa-mir-19a | MTIF2    | 0.354002749 mirna_pc |
| 11704 hsa-mir-19a | EWSR1    | 0.361444495 mirna_pc |
| 11705 hsa-mir-19a | SMC1A    | 0.348156314 mirna_pc |
| 11706 hsa-mir-19a | NUPL1    | 0.494931671 mirna_pc |
| 11707 hsa-mir-19a | ANKRD5   | 0.331283539 mirna_pc |
| 11708 hsa-mir-19a | MRPL42   | 0.335056618 mirna_pc |
| 11709 hsa-mir-19a | CCAR1    | 0.37696906 mirna_pc  |
| 11710 hsa-mir-19a | KIF21B   | 0.302054061 mirna_pc |
| 11711 hsa-mir-19a | SPRY4    | 0.354916933 mirna_pc |
| 11712 hsa-mir-19a | RNF6     | 0.305017929 mirna_pc |
| 11713 hsa-mir-19a | MAP2K6   | 0.337349613 mirna_pc |
| 11714 hsa-mir-19a | RBM26    | 0.321404642 mirna_pc |
| 11715 hsa-mir-19a | ZNF92    | 0.361594562 mirna_pc |
| 11716 hsa-mir-19a | TMTC4    | 0.311403882 mirna_pc |
| 11717 hsa-mir-19a | AZIN1    | 0.376167819 mirna_pc |

|                   |           |                      |
|-------------------|-----------|----------------------|
| 11718 hsa-mir-19a | IPO5      | 0.423249335 mirna_pc |
| 11719 hsa-mir-19a | DPAGT1    | 0.300654062 mirna_pc |
| 11720 hsa-mir-19a | NUP43     | 0.321476847 mirna_pc |
| 11721 hsa-mir-19a | CHD1L     | 0.349091909 mirna_pc |
| 11722 hsa-mir-19a | ZNF473    | 0.307844944 mirna_pc |
| 11723 hsa-mir-19a | SNRNP48   | 0.319623646 mirna_pc |
| 11724 hsa-mir-19a | DCLRE1A   | 0.335692684 mirna_pc |
| 11725 hsa-mir-19a | ZUFSP     | 0.315281266 mirna_pc |
| 11726 hsa-mir-19a | DIS3      | 0.306899535 mirna_pc |
| 11727 hsa-mir-19a | E2F5      | 0.329039117 mirna_pc |
| 11728 hsa-mir-19a | NUFIP1    | 0.397263194 mirna_pc |
| 11729 hsa-mir-19a | ZNF195    | 0.444355479 mirna_pc |
| 11730 hsa-mir-19a | BCAS2     | 0.372702416 mirna_pc |
| 11731 hsa-mir-19a | USP45     | 0.306687782 mirna_pc |
| 11732 hsa-mir-19a | NEK3      | 0.316328328 mirna_pc |
| 11733 hsa-mir-19a | TMEM170A  | 0.352344738 mirna_pc |
| 11734 hsa-mir-19a | PHF16     | 0.314147912 mirna_pc |
| 11735 hsa-mir-19a | FAM48A    | 0.337137168 mirna_pc |
| 11736 hsa-mir-19a | PMS1      | 0.321724155 mirna_pc |
| 11737 hsa-mir-19a | PNN       | 0.310915731 mirna_pc |
| 11738 hsa-mir-19a | TRUB1     | 0.362989775 mirna_pc |
| 11739 hsa-mir-19a | CCNJ      | 0.40778969 mirna_pc  |
| 11740 hsa-mir-19a | IPO7      | 0.326794828 mirna_pc |
| 11741 hsa-mir-19a | ABCC4     | 0.338740886 mirna_pc |
| 11742 hsa-mir-19a | ESF1      | 0.337199071 mirna_pc |
| 11743 hsa-mir-19a | DENND4B   | 0.307971646 mirna_pc |
| 11744 hsa-mir-19a | GTF2H2C   | 0.309274087 mirna_pc |
| 11745 hsa-mir-19a | NUS1      | 0.33946041 mirna_pc  |
| 11746 hsa-mir-19a | CTPS2     | 0.343378724 mirna_pc |
| 11747 hsa-mir-19a | XPO4      | 0.443503847 mirna_pc |
| 11748 hsa-mir-19a | SNCAIP    | 0.345116595 mirna_pc |
| 11749 hsa-mir-19a | KIF12     | 0.31019253 mirna_pc  |
| 11750 hsa-mir-19a | RNF32     | 0.312663111 mirna_pc |
| 11751 hsa-mir-19a | C20orf118 | 0.311914895 mirna_pc |
| 11752 hsa-mir-19a | IFT88     | 0.422441301 mirna_pc |
| 11753 hsa-mir-19a | QRSL1     | 0.35310281 mirna_pc  |
| 11754 hsa-mir-19a | FANCF     | 0.420710083 mirna_pc |
| 11755 hsa-mir-19a | HYOU1     | 0.355333412 mirna_pc |
| 11756 hsa-mir-19a | C2orf3    | 0.308605473 mirna_pc |
| 11757 hsa-mir-19a | FAM119A   | 0.327197457 mirna_pc |
| 11758 hsa-mir-19a | GOLT1A    | 0.348881874 mirna_pc |
| 11759 hsa-mir-19a | SCML2     | 0.349088186 mirna_pc |
| 11760 hsa-mir-19a | MRPL19    | 0.352473847 mirna_pc |
| 11761 hsa-mir-19a | ABCB10    | 0.307245247 mirna_pc |
| 11762 hsa-mir-19a | ZCCHC3    | 0.400113448 mirna_pc |
| 11763 hsa-mir-19a | RRP15     | 0.346924546 mirna_pc |
| 11764 hsa-mir-19a | ADAT2     | 0.393379041 mirna_pc |
| 11765 hsa-mir-19a | ZNF143    | 0.309194407 mirna_pc |
| 11766 hsa-mir-19a | CBLL1     | 0.326013431 mirna_pc |
| 11767 hsa-mir-19a | GTF3A     | 0.310493229 mirna_pc |
| 11768 hsa-mir-19a | TPP2      | 0.390904793 mirna_pc |
| 11769 hsa-mir-19a | SPRED2    | 0.305724807 mirna_pc |
| 11770 hsa-mir-19a | TXLNG     | 0.372806383 mirna_pc |
| 11771 hsa-mir-19a | LRP5L     | 0.314629503 mirna_pc |

|                   |          |                      |
|-------------------|----------|----------------------|
| 11772 hsa-mir-19a | MIR17HG  | 0.542833749 mirna_pc |
| 11773 hsa-mir-19a | ZNF239   | 0.410360668 mirna_pc |
| 11774 hsa-mir-19a | KLHL23   | 0.306732984 mirna_pc |
| 11775 hsa-mir-19a | ZNF202   | 0.305693049 mirna_pc |
| 11776 hsa-mir-19a | SFRS6    | 0.323603282 mirna_pc |
| 11777 hsa-mir-19a | DNMT3A   | 0.330886145 mirna_pc |
| 11778 hsa-mir-19a | PRTFDC1  | 0.307028867 mirna_pc |
| 11779 hsa-mir-19a | ZNF670   | 0.334155976 mirna_pc |
| 11780 hsa-mir-19a | ZNF711   | 0.330149504 mirna_pc |
| 11781 hsa-mir-19a | POM121   | 0.339147948 mirna_pc |
| 11782 hsa-mir-590 | TPX2     | 0.352593822 mirna_pc |
| 11783 hsa-mir-590 | RCC2     | 0.320469178 mirna_pc |
| 11784 hsa-mir-590 | HOXC9    | 0.349513627 mirna_pc |
| 11785 hsa-mir-590 | RRM2     | 0.387036772 mirna_pc |
| 11786 hsa-mir-590 | HOXC8    | 0.339871156 mirna_pc |
| 11787 hsa-mir-590 | CDK1     | 0.303505893 mirna_pc |
| 11788 hsa-mir-590 | MYBL2    | 0.353606517 mirna_pc |
| 11789 hsa-mir-590 | UBE2C    | 0.392142448 mirna_pc |
| 11790 hsa-mir-590 | PRC1     | 0.312813714 mirna_pc |
| 11791 hsa-mir-590 | NUSAP1   | 0.369719995 mirna_pc |
| 11792 hsa-mir-590 | KIFC1    | 0.328537859 mirna_pc |
| 11793 hsa-mir-590 | BUB1B    | 0.445642344 mirna_pc |
| 11794 hsa-mir-590 | HDGF     | 0.305967665 mirna_pc |
| 11795 hsa-mir-590 | NCAPG    | 0.315473312 mirna_pc |
| 11796 hsa-mir-590 | CDC20    | 0.319739278 mirna_pc |
| 11797 hsa-mir-590 | CLSPN    | 0.317295704 mirna_pc |
| 11798 hsa-mir-590 | CDC25B   | 0.327549709 mirna_pc |
| 11799 hsa-mir-590 | FANCI    | 0.425983584 mirna_pc |
| 11800 hsa-mir-590 | KIF23    | 0.397447667 mirna_pc |
| 11801 hsa-mir-590 | RAD54L   | 0.340364152 mirna_pc |
| 11802 hsa-mir-590 | CENPA    | 0.329024602 mirna_pc |
| 11803 hsa-mir-590 | TIMELESS | 0.330606646 mirna_pc |
| 11804 hsa-mir-590 | CDCA8    | 0.344135225 mirna_pc |
| 11805 hsa-mir-590 | TROAP    | 0.395103975 mirna_pc |
| 11806 hsa-mir-590 | XPO1     | 0.310934298 mirna_pc |
| 11807 hsa-mir-590 | CDC45    | 0.394523334 mirna_pc |
| 11808 hsa-mir-590 | STMN1    | 0.324247065 mirna_pc |
| 11809 hsa-mir-590 | CENPM    | 0.330929856 mirna_pc |
| 11810 hsa-mir-590 | UBE2T    | 0.307864597 mirna_pc |
| 11811 hsa-mir-590 | CKS1B    | 0.310806754 mirna_pc |
| 11812 hsa-mir-590 | KIAA0101 | 0.317557773 mirna_pc |
| 11813 hsa-mir-590 | KNTC1    | 0.360030692 mirna_pc |
| 11814 hsa-mir-590 | CCNB2    | 0.347835938 mirna_pc |
| 11815 hsa-mir-590 | NUF2     | 0.3215806 mirna_pc   |
| 11816 hsa-mir-590 | DEPDC1   | 0.343217825 mirna_pc |
| 11817 hsa-mir-590 | RAD51    | 0.354037019 mirna_pc |
| 11818 hsa-mir-590 | BLM      | 0.431812879 mirna_pc |
| 11819 hsa-mir-590 | OIP5     | 0.406560013 mirna_pc |
| 11820 hsa-mir-590 | RECQL4   | 0.387865943 mirna_pc |
| 11821 hsa-mir-590 | AURKB    | 0.328769084 mirna_pc |
| 11822 hsa-mir-590 | MCM10    | 0.31827614 mirna_pc  |
| 11823 hsa-mir-590 | CHEK2    | 0.480421847 mirna_pc |
| 11824 hsa-mir-590 | CDCA3    | 0.383480993 mirna_pc |
| 11825 hsa-mir-590 | Clorf112 | 0.335672993 mirna_pc |

|                   |          |                      |
|-------------------|----------|----------------------|
| 11826 hsa-mir-590 | ADRM1    | 0.342515532 mirna_pc |
| 11827 hsa-mir-590 | C12orf48 | 0.400310975 mirna_pc |
| 11828 hsa-mir-590 | HNRNPL   | 0.360271361 mirna_pc |
| 11829 hsa-mir-590 | ZWILCH   | 0.417575032 mirna_pc |
| 11830 hsa-mir-590 | TTK      | 0.328210359 mirna_pc |
| 11831 hsa-mir-590 | ZWINT    | 0.326050583 mirna_pc |
| 11832 hsa-mir-590 | TUBA1B   | 0.302362299 mirna_pc |
| 11833 hsa-mir-590 | UBE2S    | 0.332265853 mirna_pc |
| 11834 hsa-mir-590 | PSMA4    | 0.357993224 mirna_pc |
| 11835 hsa-mir-590 | C11orf82 | 0.304811049 mirna_pc |
| 11836 hsa-mir-590 | HNRNPC   | 0.33848491 mirna_pc  |
| 11837 hsa-mir-590 | C6orf167 | 0.330147012 mirna_pc |
| 11838 hsa-mir-590 | RAN      | 0.369578044 mirna_pc |
| 11839 hsa-mir-590 | C20orf20 | 0.373374273 mirna_pc |
| 11840 hsa-mir-590 | PIF1     | 0.311815568 mirna_pc |
| 11841 hsa-mir-590 | DCAF13   | 0.319784605 mirna_pc |
| 11842 hsa-mir-590 | MTHFD1L  | 0.320231851 mirna_pc |
| 11843 hsa-mir-590 | UCK2     | 0.380623142 mirna_pc |
| 11844 hsa-mir-590 | NFKBIL2  | 0.35408757 mirna_pc  |
| 11845 hsa-mir-590 | C15orf42 | 0.363691939 mirna_pc |
| 11846 hsa-mir-590 | FAM60A   | 0.395435094 mirna_pc |
| 11847 hsa-mir-590 | RANBP1   | 0.372574099 mirna_pc |
| 11848 hsa-mir-590 | MTBP     | 0.300507401 mirna_pc |
| 11849 hsa-mir-590 | E2F1     | 0.369860889 mirna_pc |
| 11850 hsa-mir-590 | SNRPA    | 0.362517416 mirna_pc |
| 11851 hsa-mir-590 | ATAD2    | 0.328056952 mirna_pc |
| 11852 hsa-mir-590 | U2AF2    | 0.307872153 mirna_pc |
| 11853 hsa-mir-590 | CENPO    | 0.324618843 mirna_pc |
| 11854 hsa-mir-590 | C19orf48 | 0.30180686 mirna_pc  |
| 11855 hsa-mir-590 | NOP56    | 0.405561684 mirna_pc |
| 11856 hsa-mir-590 | CSE1L    | 0.40414934 mirna_pc  |
| 11857 hsa-mir-590 | DTYMK    | 0.30441509 mirna_pc  |
| 11858 hsa-mir-590 | NOP2     | 0.357514207 mirna_pc |
| 11859 hsa-mir-590 | CDK2     | 0.327947222 mirna_pc |
| 11860 hsa-mir-590 | CDK4     | 0.364683254 mirna_pc |
| 11861 hsa-mir-590 | PFDN2    | 0.356017721 mirna_pc |
| 11862 hsa-mir-590 | BCL2L12  | 0.315583842 mirna_pc |
| 11863 hsa-mir-590 | CHTF18   | 0.307631477 mirna_pc |
| 11864 hsa-mir-590 | CENPH    | 0.308304466 mirna_pc |
| 11865 hsa-mir-590 | MSH2     | 0.349637527 mirna_pc |
| 11866 hsa-mir-590 | CDC7     | 0.33268278 mirna_pc  |
| 11867 hsa-mir-590 | SSB      | 0.306964738 mirna_pc |
| 11868 hsa-mir-590 | YDJC     | 0.357955322 mirna_pc |
| 11869 hsa-mir-590 | PUS1     | 0.437432065 mirna_pc |
| 11870 hsa-mir-590 | SNRPC    | 0.34818087 mirna_pc  |
| 11871 hsa-mir-590 | FBX05    | 0.305582325 mirna_pc |
| 11872 hsa-mir-590 | BRIX1    | 0.344895162 mirna_pc |
| 11873 hsa-mir-590 | E2F3     | 0.327754513 mirna_pc |
| 11874 hsa-mir-590 | SF3B14   | 0.315450701 mirna_pc |
| 11875 hsa-mir-590 | RUVBL2   | 0.343144403 mirna_pc |
| 11876 hsa-mir-590 | CDC25A   | 0.351815803 mirna_pc |
| 11877 hsa-mir-590 | RAD54B   | 0.333029041 mirna_pc |
| 11878 hsa-mir-590 | MAGOH    | 0.310326904 mirna_pc |
| 11879 hsa-mir-590 | DDX12    | 0.318964045 mirna_pc |



|                   |              |                      |
|-------------------|--------------|----------------------|
| 11880 hsa-mir-590 | DSCC1        | 0.393882035 mirna_pc |
| 11881 hsa-mir-590 | NUP37        | 0.374688369 mirna_pc |
| 11882 hsa-mir-590 | CLN6         | 0.364960046 mirna_pc |
| 11883 hsa-mir-590 | MCM8         | 0.342721501 mirna_pc |
| 11884 hsa-mir-590 | CPSF3        | 0.38350359 mirna_pc  |
| 11885 hsa-mir-590 | BANF1        | 0.331946201 mirna_pc |
| 11886 hsa-mir-590 | C21orf45     | 0.332805962 mirna_pc |
| 11887 hsa-mir-590 | PPM1G        | 0.360274026 mirna_pc |
| 11888 hsa-mir-590 | NPM3         | 0.347603162 mirna_pc |
| 11889 hsa-mir-590 | NUDT5        | 0.344645248 mirna_pc |
| 11890 hsa-mir-590 | ZNF367       | 0.314804646 mirna_pc |
| 11891 hsa-mir-590 | PUS7         | 0.320361807 mirna_pc |
| 11892 hsa-mir-590 | DAZAP1       | 0.340762259 mirna_pc |
| 11893 hsa-mir-590 | CBX8         | 0.321370841 mirna_pc |
| 11894 hsa-mir-590 | TRMT6        | 0.312517236 mirna_pc |
| 11895 hsa-mir-590 | PFDN4        | 0.355125465 mirna_pc |
| 11896 hsa-mir-590 | PAFAH1B3     | 0.319018409 mirna_pc |
| 11897 hsa-mir-590 | SRRT         | 0.320377924 mirna_pc |
| 11898 hsa-mir-590 | SASS6        | 0.327980835 mirna_pc |
| 11899 hsa-mir-590 | FBL          | 0.339213197 mirna_pc |
| 11900 hsa-mir-590 | PNPT1        | 0.313474401 mirna_pc |
| 11901 hsa-mir-590 | TMPO         | 0.317840944 mirna_pc |
| 11902 hsa-mir-590 | MRT04        | 0.355199066 mirna_pc |
| 11903 hsa-mir-590 | ADPGK        | 0.32034876 mirna_pc  |
| 11904 hsa-mir-590 | GABPB1       | 0.310609933 mirna_pc |
| 11905 hsa-mir-590 | CCDC138      | 0.302940514 mirna_pc |
| 11906 hsa-mir-590 | LOC100128191 | 0.335563557 mirna_pc |
| 11907 hsa-mir-590 | EIF5A        | 0.312993345 mirna_pc |
| 11908 hsa-mir-590 | SF3A2        | 0.311351246 mirna_pc |
| 11909 hsa-mir-590 | SNRPF        | 0.371476015 mirna_pc |
| 11910 hsa-mir-590 | WDR43        | 0.361811151 mirna_pc |
| 11911 hsa-mir-590 | SNRPA1       | 0.464823976 mirna_pc |
| 11912 hsa-mir-590 | TIPIN        | 0.409194455 mirna_pc |
| 11913 hsa-mir-590 | SNX8         | 0.306215345 mirna_pc |
| 11914 hsa-mir-590 | GPN1         | 0.303101544 mirna_pc |
| 11915 hsa-mir-590 | PA2G4        | 0.39845404 mirna_pc  |
| 11916 hsa-mir-590 | SNRPD3       | 0.459287052 mirna_pc |
| 11917 hsa-mir-590 | KHDRBS1      | 0.344068076 mirna_pc |
| 11918 hsa-mir-590 | SLC5A6       | 0.373558713 mirna_pc |
| 11919 hsa-mir-590 | LOC92659     | 0.324230186 mirna_pc |
| 11920 hsa-mir-590 | FKBP1A       | 0.331847022 mirna_pc |
| 11921 hsa-mir-590 | PHF5A        | 0.312909742 mirna_pc |
| 11922 hsa-mir-590 | CCDC18       | 0.340090763 mirna_pc |
| 11923 hsa-mir-590 | AHCY         | 0.304660336 mirna_pc |
| 11924 hsa-mir-590 | DNAJC2       | 0.31757796 mirna_pc  |
| 11925 hsa-mir-590 | SNRNP40      | 0.304566185 mirna_pc |
| 11926 hsa-mir-590 | INTS8        | 0.326686205 mirna_pc |
| 11927 hsa-mir-590 | METTL1       | 0.375100514 mirna_pc |
| 11928 hsa-mir-590 | HAUS6        | 0.305315747 mirna_pc |
| 11929 hsa-mir-590 | NSUN5        | 0.339841799 mirna_pc |
| 11930 hsa-mir-590 | GNL2         | 0.371686262 mirna_pc |
| 11931 hsa-mir-590 | NASP         | 0.303273501 mirna_pc |
| 11932 hsa-mir-590 | OBFC2B       | 0.379554697 mirna_pc |
| 11933 hsa-mir-590 | PTMA         | 0.30138087 mirna_pc  |

|                   |          |                      |
|-------------------|----------|----------------------|
| 11934 hsa-mir-590 | DENR     | 0.408889997 mirna_pc |
| 11935 hsa-mir-590 | SCARB1   | 0.307344625 mirna_pc |
| 11936 hsa-mir-590 | TBCE     | 0.303944557 mirna_pc |
| 11937 hsa-mir-590 | SUV39H2  | 0.328659083 mirna_pc |
| 11938 hsa-mir-590 | DPY30    | 0.330874192 mirna_pc |
| 11939 hsa-mir-590 | MTHFD2   | 0.374659043 mirna_pc |
| 11940 hsa-mir-590 | CCT4     | 0.309033314 mirna_pc |
| 11941 hsa-mir-590 | TBC1D7   | 0.337860978 mirna_pc |
| 11942 hsa-mir-590 | PAK1IP1  | 0.461553099 mirna_pc |
| 11943 hsa-mir-590 | PES 1.00 | 0.341349414 mirna_pc |
| 11944 hsa-mir-590 | PGAM5    | 0.317905748 mirna_pc |
| 11945 hsa-mir-590 | YWHAE    | 0.313018664 mirna_pc |
| 11946 hsa-mir-590 | NAA25    | 0.381422967 mirna_pc |
| 11947 hsa-mir-590 | EHMT2    | 0.325925024 mirna_pc |
| 11948 hsa-mir-590 | DEK      | 0.327448011 mirna_pc |
| 11949 hsa-mir-590 | SFRS9    | 0.351266821 mirna_pc |
| 11950 hsa-mir-590 | PPIB     | 0.329298221 mirna_pc |
| 11951 hsa-mir-590 | PRAME    | 0.329699753 mirna_pc |
| 11952 hsa-mir-590 | SART3    | 0.309675644 mirna_pc |
| 11953 hsa-mir-590 | C15orf23 | 0.426105154 mirna_pc |
| 11954 hsa-mir-590 | WBSCR22  | 0.408871009 mirna_pc |
| 11955 hsa-mir-590 | NOC4L    | 0.378338006 mirna_pc |
| 11956 hsa-mir-590 | DIABLO   | 0.365114329 mirna_pc |
| 11957 hsa-mir-590 | TDG      | 0.38944465 mirna_pc  |
| 11958 hsa-mir-590 | EIF2S2   | 0.324114185 mirna_pc |
| 11959 hsa-mir-590 | SPG21    | 0.347793888 mirna_pc |
| 11960 hsa-mir-590 | DDX55    | 0.371603248 mirna_pc |
| 11961 hsa-mir-590 | C17orf96 | 0.389819242 mirna_pc |
| 11962 hsa-mir-590 | CNOT3    | 0.314965767 mirna_pc |
| 11963 hsa-mir-590 | VPS72    | 0.322139079 mirna_pc |
| 11964 hsa-mir-590 | RHBDD3   | 0.353366663 mirna_pc |
| 11965 hsa-mir-590 | TMEM120B | 0.304260946 mirna_pc |
| 11966 hsa-mir-590 | SHMT2    | 0.324440978 mirna_pc |
| 11967 hsa-mir-590 | HDAC2    | 0.442877348 mirna_pc |
| 11968 hsa-mir-590 | EMG1     | 0.332226766 mirna_pc |
| 11969 hsa-mir-590 | CSNK1E   | 0.330856755 mirna_pc |
| 11970 hsa-mir-590 | PA2G4P4  | 0.422139709 mirna_pc |
| 11971 hsa-mir-590 | TCEB1    | 0.321484444 mirna_pc |
| 11972 hsa-mir-590 | NUDT3    | 0.363808847 mirna_pc |
| 11973 hsa-mir-590 | BAT1     | 0.309592505 mirna_pc |
| 11974 hsa-mir-590 | RFC2     | 0.37838711 mirna_pc  |
| 11975 hsa-mir-590 | TAF5     | 0.401087455 mirna_pc |
| 11976 hsa-mir-590 | PDIA3    | 0.342212527 mirna_pc |
| 11977 hsa-mir-590 | EXOSC4   | 0.330148488 mirna_pc |
| 11978 hsa-mir-590 | FARSB    | 0.34297127 mirna_pc  |
| 11979 hsa-mir-590 | RCN2     | 0.300574521 mirna_pc |
| 11980 hsa-mir-590 | MTF2     | 0.328298437 mirna_pc |
| 11981 hsa-mir-590 | TARBP2   | 0.300658883 mirna_pc |
| 11982 hsa-mir-590 | TOMM22   | 0.328104357 mirna_pc |
| 11983 hsa-mir-590 | NOL10    | 0.345694103 mirna_pc |
| 11984 hsa-mir-590 | SEMA3D   | 0.300115059 mirna_pc |
| 11985 hsa-mir-590 | SF3A3    | 0.328859421 mirna_pc |
| 11986 hsa-mir-590 | DDX47    | 0.321470689 mirna_pc |
| 11987 hsa-mir-590 | POLE     | 0.404969861 mirna_pc |

|       |             |          |             |          |
|-------|-------------|----------|-------------|----------|
| 11988 | hsa-mir-590 | C8orf30A | 0.354941349 | mirna_pc |
| 11989 | hsa-mir-590 | CHML     | 0.306852638 | mirna_pc |
| 11990 | hsa-mir-590 | WRNIP1   | 0.334890295 | mirna_pc |
| 11991 | hsa-mir-590 | TAF1B    | 0.361845913 | mirna_pc |
| 11992 | hsa-mir-590 | TRIAP1   | 0.345120877 | mirna_pc |
| 11993 | hsa-mir-590 | TIMM50   | 0.31009948  | mirna_pc |
| 11994 | hsa-mir-590 | ADSL     | 0.306538133 | mirna_pc |
| 11995 | hsa-mir-590 | VRK1     | 0.303910758 | mirna_pc |
| 11996 | hsa-mir-590 | CDK16    | 0.339322567 | mirna_pc |
| 11997 | hsa-mir-590 | ALKBH2   | 0.304876035 | mirna_pc |
| 11998 | hsa-mir-590 | CCDC90A  | 0.332076956 | mirna_pc |
| 11999 | hsa-mir-590 | PDIA3P   | 0.304970803 | mirna_pc |
| 12000 | hsa-mir-590 | RPF2     | 0.36634603  | mirna_pc |
| 12001 | hsa-mir-590 | GPN3     | 0.367779845 | mirna_pc |
| 12002 | hsa-mir-590 | KDM2B    | 0.309199585 | mirna_pc |
| 12003 | hsa-mir-590 | GTF3C2   | 0.31297031  | mirna_pc |
| 12004 | hsa-mir-590 | C19orf73 | 0.347386709 | mirna_pc |
| 12005 | hsa-mir-590 | C15orf63 | 0.320335024 | mirna_pc |
| 12006 | hsa-mir-590 | LTV1     | 0.36317519  | mirna_pc |
| 12007 | hsa-mir-590 | PCGF6    | 0.418988828 | mirna_pc |
| 12008 | hsa-mir-590 | FAM136A  | 0.364956919 | mirna_pc |
| 12009 | hsa-mir-590 | YRDC     | 0.38264342  | mirna_pc |
| 12010 | hsa-mir-590 | SMARCB1  | 0.347361299 | mirna_pc |
| 12011 | hsa-mir-590 | CCT8     | 0.413080332 | mirna_pc |
| 12012 | hsa-mir-590 | UFD1L    | 0.375530679 | mirna_pc |
| 12013 | hsa-mir-590 | SLC25A17 | 0.346832197 | mirna_pc |
| 12014 | hsa-mir-590 | MKRN3    | 0.306558458 | mirna_pc |
| 12015 | hsa-mir-590 | STRA13   | 0.416076849 | mirna_pc |
| 12016 | hsa-mir-590 | BCL7A    | 0.314846432 | mirna_pc |
| 12017 | hsa-mir-590 | TIMM16   | 0.315439367 | mirna_pc |
| 12018 | hsa-mir-590 | SFXN4    | 0.321114366 | mirna_pc |
| 12019 | hsa-mir-590 | PPP1CC   | 0.324521567 | mirna_pc |
| 12020 | hsa-mir-590 | C1orf109 | 0.33880838  | mirna_pc |
| 12021 | hsa-mir-590 | UBE2N    | 0.385649453 | mirna_pc |
| 12022 | hsa-mir-590 | FBX022   | 0.304108812 | mirna_pc |
| 12023 | hsa-mir-590 | SEC61A2  | 0.320814834 | mirna_pc |
| 12024 | hsa-mir-590 | NHP2L1   | 0.311732269 | mirna_pc |
| 12025 | hsa-mir-590 | MAPKAPK5 | 0.403112876 | mirna_pc |
| 12026 | hsa-mir-590 | DRG1     | 0.452169757 | mirna_pc |
| 12027 | hsa-mir-590 | NOL7     | 0.343349075 | mirna_pc |
| 12028 | hsa-mir-590 | B4GALT3  | 0.354825159 | mirna_pc |
| 12029 | hsa-mir-590 | CCDC59   | 0.338914021 | mirna_pc |
| 12030 | hsa-mir-590 | TCTE3    | 0.308888263 | mirna_pc |
| 12031 | hsa-mir-590 | EWSR1    | 0.456173133 | mirna_pc |
| 12032 | hsa-mir-590 | KRR1     | 0.328236844 | mirna_pc |
| 12033 | hsa-mir-590 | AAAS     | 0.348256242 | mirna_pc |
| 12034 | hsa-mir-590 | SFRS8    | 0.318864794 | mirna_pc |
| 12035 | hsa-mir-590 | MTFMT    | 0.306313405 | mirna_pc |
| 12036 | hsa-mir-590 | SUPT7L   | 0.308193707 | mirna_pc |
| 12037 | hsa-mir-590 | PELP1    | 0.322104947 | mirna_pc |
| 12038 | hsa-mir-590 | ZNF692   | 0.33751544  | mirna_pc |
| 12039 | hsa-mir-590 | SFRS7    | 0.336413126 | mirna_pc |
| 12040 | hsa-mir-590 | MRPL42   | 0.371813859 | mirna_pc |
| 12041 | hsa-mir-590 | TRMT2A   | 0.349328304 | mirna_pc |

|                   |           |                      |
|-------------------|-----------|----------------------|
| 12042 hsa-mir-590 | PCBP2     | 0.300585928 mirna_pc |
| 12043 hsa-mir-590 | COQ3      | 0.302800319 mirna_pc |
| 12044 hsa-mir-590 | RPUSD2    | 0.335331139 mirna_pc |
| 12045 hsa-mir-590 | NIPSNAP1  | 0.367304667 mirna_pc |
| 12046 hsa-mir-590 | SERBP1    | 0.301714658 mirna_pc |
| 12047 hsa-mir-590 | RDBP      | 0.312208016 mirna_pc |
| 12048 hsa-mir-590 | SPRYD4    | 0.377518457 mirna_pc |
| 12049 hsa-mir-590 | EEF1E1    | 0.306243524 mirna_pc |
| 12050 hsa-mir-590 | ZCCHC8    | 0.334455042 mirna_pc |
| 12051 hsa-mir-590 | C12orf45  | 0.302535908 mirna_pc |
| 12052 hsa-mir-590 | ZNF259    | 0.313642144 mirna_pc |
| 12053 hsa-mir-590 | LOC338758 | 0.346905819 mirna_pc |
| 12054 hsa-mir-590 | POLR2F    | 0.340158568 mirna_pc |
| 12055 hsa-mir-590 | MDH2      | 0.303881554 mirna_pc |
| 12056 hsa-mir-590 | LYRM4     | 0.323873246 mirna_pc |
| 12057 hsa-mir-590 | UTP11L    | 0.318832229 mirna_pc |
| 12058 hsa-mir-590 | GRB14     | 0.30263174 mirna_pc  |
| 12059 hsa-mir-590 | ANP32A    | 0.372638289 mirna_pc |
| 12060 hsa-mir-590 | SUPV3L1   | 0.322502692 mirna_pc |
| 12061 hsa-mir-590 | SDF2L1    | 0.395036601 mirna_pc |
| 12062 hsa-mir-590 | LCMT2     | 0.336906835 mirna_pc |
| 12063 hsa-mir-590 | RSL24D1   | 0.325518572 mirna_pc |
| 12064 hsa-mir-590 | BUD13     | 0.350944884 mirna_pc |
| 12065 hsa-mir-590 | BCCIP     | 0.309202414 mirna_pc |
| 12066 hsa-mir-590 | TRUB1     | 0.324016928 mirna_pc |
| 12067 hsa-mir-590 | C12orf24  | 0.306747871 mirna_pc |
| 12068 hsa-mir-590 | SF3A1     | 0.302501083 mirna_pc |
| 12069 hsa-mir-590 | SLC25A33  | 0.330530092 mirna_pc |
| 12070 hsa-mir-590 | GPR37     | 0.311272288 mirna_pc |
| 12071 hsa-mir-590 | TIAL1     | 0.33609061 mirna_pc  |
| 12072 hsa-mir-590 | DDX51     | 0.362265796 mirna_pc |
| 12073 hsa-mir-590 | MED17     | 0.374280185 mirna_pc |
| 12074 hsa-mir-590 | MTG1      | 0.346119284 mirna_pc |
| 12075 hsa-mir-590 | LOC221710 | 0.369673905 mirna_pc |
| 12076 hsa-mir-590 | UBE2L3    | 0.313518431 mirna_pc |
| 12077 hsa-mir-590 | SCML2     | 0.355370775 mirna_pc |
| 12078 hsa-mir-590 | DACT2     | 0.322481478 mirna_pc |
| 12079 hsa-mir-590 | DDX1      | 0.300811329 mirna_pc |
| 12080 hsa-mir-590 | C2orf43   | 0.309916752 mirna_pc |
| 12081 hsa-mir-590 | EIF3J     | 0.310489272 mirna_pc |
| 12082 hsa-mir-590 | CCDC117   | 0.317944798 mirna_pc |
| 12083 hsa-mir-590 | DNAJC30   | 0.302919493 mirna_pc |
| 12084 hsa-mir-590 | PREB      | 0.449351248 mirna_pc |
| 12085 hsa-mir-590 | TMED2     | 0.308300434 mirna_pc |
| 12086 hsa-mir-590 | TMEM14B   | 0.330372352 mirna_pc |
| 12087 hsa-mir-590 | C22orf29  | 0.311177094 mirna_pc |
| 12088 hsa-mir-590 | PPCDC     | 0.314300965 mirna_pc |
| 12089 hsa-mir-590 | MARS      | 0.309527708 mirna_pc |
| 12090 hsa-mir-590 | C12orf73  | 0.324738405 mirna_pc |
| 12091 hsa-mir-590 | SS18L1    | 0.33682863 mirna_pc  |
| 12092 hsa-mir-671 | TPX2      | 0.369144971 mirna_pc |
| 12093 hsa-mir-671 | KIF4B     | 0.322336578 mirna_pc |
| 12094 hsa-mir-671 | KPNA2     | 0.373433718 mirna_pc |
| 12095 hsa-mir-671 | CENPF     | 0.330905461 mirna_pc |

|                   |           |                      |
|-------------------|-----------|----------------------|
| 12096 hsa-mir-671 | RCC2      | 0.359870122 mirna_pc |
| 12097 hsa-mir-671 | KIF11     | 0.372559777 mirna_pc |
| 12098 hsa-mir-671 | ECT2      | 0.429910431 mirna_pc |
| 12099 hsa-mir-671 | FOXM1     | 0.461325434 mirna_pc |
| 12100 hsa-mir-671 | RRM2      | 0.373921318 mirna_pc |
| 12101 hsa-mir-671 | SPC24     | 0.31354997 mirna_pc  |
| 12102 hsa-mir-671 | CDK1      | 0.396013878 mirna_pc |
| 12103 hsa-mir-671 | MYBL2     | 0.375246914 mirna_pc |
| 12104 hsa-mir-671 | PCNA      | 0.314931828 mirna_pc |
| 12105 hsa-mir-671 | UBE2C     | 0.347760078 mirna_pc |
| 12106 hsa-mir-671 | BUB1      | 0.371570926 mirna_pc |
| 12107 hsa-mir-671 | PRC1      | 0.327106561 mirna_pc |
| 12108 hsa-mir-671 | NUSAP1    | 0.416988356 mirna_pc |
| 12109 hsa-mir-671 | MCM4      | 0.374622895 mirna_pc |
| 12110 hsa-mir-671 | KIFC1     | 0.313078211 mirna_pc |
| 12111 hsa-mir-671 | BUB1B     | 0.422827769 mirna_pc |
| 12112 hsa-mir-671 | KIF18B    | 0.338878665 mirna_pc |
| 12113 hsa-mir-671 | ASPM      | 0.33368454 mirna_pc  |
| 12114 hsa-mir-671 | CKAP2     | 0.327819194 mirna_pc |
| 12115 hsa-mir-671 | FANCA     | 0.361635704 mirna_pc |
| 12116 hsa-mir-671 | NCAPG     | 0.368275754 mirna_pc |
| 12117 hsa-mir-671 | CDC20     | 0.307030327 mirna_pc |
| 12118 hsa-mir-671 | CLSPN     | 0.337216669 mirna_pc |
| 12119 hsa-mir-671 | SGOL1     | 0.316043131 mirna_pc |
| 12120 hsa-mir-671 | ARHGAP11A | 0.353383336 mirna_pc |
| 12121 hsa-mir-671 | CCNA2     | 0.379848928 mirna_pc |
| 12122 hsa-mir-671 | CEP55     | 0.322701448 mirna_pc |
| 12123 hsa-mir-671 | CBX3      | 0.305926203 mirna_pc |
| 12124 hsa-mir-671 | SPC25     | 0.390512501 mirna_pc |
| 12125 hsa-mir-671 | MELK      | 0.378292859 mirna_pc |
| 12126 hsa-mir-671 | NUP62     | 0.328156643 mirna_pc |
| 12127 hsa-mir-671 | FANCI     | 0.420763595 mirna_pc |
| 12128 hsa-mir-671 | NEK2      | 0.304753307 mirna_pc |
| 12129 hsa-mir-671 | DDX39     | 0.339255916 mirna_pc |
| 12130 hsa-mir-671 | NCAPH     | 0.448542548 mirna_pc |
| 12131 hsa-mir-671 | GTSE1     | 0.459880302 mirna_pc |
| 12132 hsa-mir-671 | KIF23     | 0.416086708 mirna_pc |
| 12133 hsa-mir-671 | RAD54L    | 0.344820056 mirna_pc |
| 12134 hsa-mir-671 | CENPA     | 0.426129129 mirna_pc |
| 12135 hsa-mir-671 | MAD2L1    | 0.374378338 mirna_pc |
| 12136 hsa-mir-671 | TIMELESS  | 0.450988578 mirna_pc |
| 12137 hsa-mir-671 | ASF1B     | 0.414390689 mirna_pc |
| 12138 hsa-mir-671 | CDCA8     | 0.310658182 mirna_pc |
| 12139 hsa-mir-671 | TROAP     | 0.482415715 mirna_pc |
| 12140 hsa-mir-671 | CDCA5     | 0.375488166 mirna_pc |
| 12141 hsa-mir-671 | XPO1      | 0.417524485 mirna_pc |
| 12142 hsa-mir-671 | CDC45     | 0.541657252 mirna_pc |
| 12143 hsa-mir-671 | CENPM     | 0.415684907 mirna_pc |
| 12144 hsa-mir-671 | EXO1      | 0.353308278 mirna_pc |
| 12145 hsa-mir-671 | TK1       | 0.427100902 mirna_pc |
| 12146 hsa-mir-671 | CDCA2     | 0.332375684 mirna_pc |
| 12147 hsa-mir-671 | DKC1      | 0.396532491 mirna_pc |
| 12148 hsa-mir-671 | UBE2T     | 0.326330248 mirna_pc |
| 12149 hsa-mir-671 | CKS1B     | 0.359378767 mirna_pc |

|                   |          |                      |
|-------------------|----------|----------------------|
| 12150 hsa-mir-671 | MCM2     | 0.442432305 mirna_pc |
| 12151 hsa-mir-671 | KIAA0101 | 0.436782833 mirna_pc |
| 12152 hsa-mir-671 | KIF4A    | 0.343444509 mirna_pc |
| 12153 hsa-mir-671 | ORC1L    | 0.420949781 mirna_pc |
| 12154 hsa-mir-671 | SNRPB    | 0.306638222 mirna_pc |
| 12155 hsa-mir-671 | KNTC1    | 0.389168388 mirna_pc |
| 12156 hsa-mir-671 | UHRF1    | 0.348923051 mirna_pc |
| 12157 hsa-mir-671 | CCNF     | 0.393450234 mirna_pc |
| 12158 hsa-mir-671 | CENPI    | 0.375146758 mirna_pc |
| 12159 hsa-mir-671 | RACGAP1  | 0.361166262 mirna_pc |
| 12160 hsa-mir-671 | CCNB2    | 0.385552288 mirna_pc |
| 12161 hsa-mir-671 | NUF2     | 0.407124249 mirna_pc |
| 12162 hsa-mir-671 | PLK4     | 0.367737658 mirna_pc |
| 12163 hsa-mir-671 | FANCB    | 0.340117181 mirna_pc |
| 12164 hsa-mir-671 | KIF18A   | 0.398717122 mirna_pc |
| 12165 hsa-mir-671 | DEPDC1   | 0.317678483 mirna_pc |
| 12166 hsa-mir-671 | SKA3     | 0.38928549 mirna_pc  |
| 12167 hsa-mir-671 | KIF14    | 0.315986896 mirna_pc |
| 12168 hsa-mir-671 | HJURP    | 0.405375889 mirna_pc |
| 12169 hsa-mir-671 | SKA1     | 0.407339925 mirna_pc |
| 12170 hsa-mir-671 | RAD51    | 0.420560999 mirna_pc |
| 12171 hsa-mir-671 | BLM      | 0.408366352 mirna_pc |
| 12172 hsa-mir-671 | SHCBP1   | 0.313524555 mirna_pc |
| 12173 hsa-mir-671 | CKAP2L   | 0.306303365 mirna_pc |
| 12174 hsa-mir-671 | DNMT1    | 0.449483668 mirna_pc |
| 12175 hsa-mir-671 | PAICS    | 0.330301747 mirna_pc |
| 12176 hsa-mir-671 | BIRC5    | 0.462964341 mirna_pc |
| 12177 hsa-mir-671 | LIG1     | 0.343077144 mirna_pc |
| 12178 hsa-mir-671 | OIP5     | 0.396435218 mirna_pc |
| 12179 hsa-mir-671 | DTL      | 0.43057617 mirna_pc  |
| 12180 hsa-mir-671 | EME1     | 0.437815898 mirna_pc |
| 12181 hsa-mir-671 | RECQL4   | 0.35580389 mirna_pc  |
| 12182 hsa-mir-671 | AURKA    | 0.329866284 mirna_pc |
| 12183 hsa-mir-671 | CENPK    | 0.374155499 mirna_pc |
| 12184 hsa-mir-671 | AURKB    | 0.425005972 mirna_pc |
| 12185 hsa-mir-671 | GSG2     | 0.41736038 mirna_pc  |
| 12186 hsa-mir-671 | CDT1     | 0.388719407 mirna_pc |
| 12187 hsa-mir-671 | MCM10    | 0.402163749 mirna_pc |
| 12188 hsa-mir-671 | KIF20A   | 0.414442139 mirna_pc |
| 12189 hsa-mir-671 | SGOL2    | 0.34745532 mirna_pc  |
| 12190 hsa-mir-671 | CHEK2    | 0.487101147 mirna_pc |
| 12191 hsa-mir-671 | POLQ     | 0.439775836 mirna_pc |
| 12192 hsa-mir-671 | CDCA3    | 0.457797966 mirna_pc |
| 12193 hsa-mir-671 | Clorf112 | 0.475560872 mirna_pc |
| 12194 hsa-mir-671 | GINS1    | 0.340003798 mirna_pc |
| 12195 hsa-mir-671 | ALG3     | 0.433664187 mirna_pc |
| 12196 hsa-mir-671 | FEN1     | 0.328257622 mirna_pc |
| 12197 hsa-mir-671 | TRAIP    | 0.301546912 mirna_pc |
| 12198 hsa-mir-671 | ORC6L    | 0.425501288 mirna_pc |
| 12199 hsa-mir-671 | PBK      | 0.304774199 mirna_pc |
| 12200 hsa-mir-671 | C16orf59 | 0.522795136 mirna_pc |
| 12201 hsa-mir-671 | C17orf53 | 0.373973754 mirna_pc |
| 12202 hsa-mir-671 | RAE1     | 0.302505818 mirna_pc |
| 12203 hsa-mir-671 | FAM72D   | 0.32227459 mirna_pc  |

|                   |          |                      |
|-------------------|----------|----------------------|
| 12204 hsa-mir-671 | FAM72B   | 0.381685635 mirna_pc |
| 12205 hsa-mir-671 | EZH2     | 0.424207559 mirna_pc |
| 12206 hsa-mir-671 | NEIL3    | 0.411043879 mirna_pc |
| 12207 hsa-mir-671 | ACTL6A   | 0.538388388 mirna_pc |
| 12208 hsa-mir-671 | POLD1    | 0.425777575 mirna_pc |
| 12209 hsa-mir-671 | C12orf48 | 0.447879416 mirna_pc |
| 12210 hsa-mir-671 | HNRNPL   | 0.435681756 mirna_pc |
| 12211 hsa-mir-671 | ZWILCH   | 0.440820748 mirna_pc |
| 12212 hsa-mir-671 | SMC4     | 0.493894348 mirna_pc |
| 12213 hsa-mir-671 | HMMR     | 0.326531733 mirna_pc |
| 12214 hsa-mir-671 | PKMYT1   | 0.392734979 mirna_pc |
| 12215 hsa-mir-671 | TTK      | 0.386734501 mirna_pc |
| 12216 hsa-mir-671 | SF3B4    | 0.323611042 mirna_pc |
| 12217 hsa-mir-671 | ZWINT    | 0.308269929 mirna_pc |
| 12218 hsa-mir-671 | TUBA1B   | 0.334821115 mirna_pc |
| 12219 hsa-mir-671 | RUVBL1   | 0.40101332 mirna_pc  |
| 12220 hsa-mir-671 | RAD51AP1 | 0.377500472 mirna_pc |
| 12221 hsa-mir-671 | HELLS    | 0.386679975 mirna_pc |
| 12222 hsa-mir-671 | ERCC6L   | 0.32246424 mirna_pc  |
| 12223 hsa-mir-671 | POLE2    | 0.332141552 mirna_pc |
| 12224 hsa-mir-671 | UBE2S    | 0.374712111 mirna_pc |
| 12225 hsa-mir-671 | PSMA4    | 0.35357611 mirna_pc  |
| 12226 hsa-mir-671 | NCAPD2   | 0.433355346 mirna_pc |
| 12227 hsa-mir-671 | C11orf82 | 0.368853984 mirna_pc |
| 12228 hsa-mir-671 | HNRNPC   | 0.389649386 mirna_pc |
| 12229 hsa-mir-671 | C6orf167 | 0.380503267 mirna_pc |
| 12230 hsa-mir-671 | CHEK1    | 0.332535821 mirna_pc |
| 12231 hsa-mir-671 | BRCA1    | 0.384441289 mirna_pc |
| 12232 hsa-mir-671 | NDC80    | 0.306252355 mirna_pc |
| 12233 hsa-mir-671 | TFRC     | 0.379550486 mirna_pc |
| 12234 hsa-mir-671 | MCM5     | 0.473069136 mirna_pc |
| 12235 hsa-mir-671 | RAN      | 0.394270744 mirna_pc |
| 12236 hsa-mir-671 | TYMS     | 0.360071989 mirna_pc |
| 12237 hsa-mir-671 | RFWD3    | 0.403282114 mirna_pc |
| 12238 hsa-mir-671 | C20orf20 | 0.332554473 mirna_pc |
| 12239 hsa-mir-671 | MCM6     | 0.373781198 mirna_pc |
| 12240 hsa-mir-671 | RNASEH2A | 0.302301605 mirna_pc |
| 12241 hsa-mir-671 | EPR1     | 0.388155673 mirna_pc |
| 12242 hsa-mir-671 | KIAA1524 | 0.364347319 mirna_pc |
| 12243 hsa-mir-671 | BRIP1    | 0.373041093 mirna_pc |
| 12244 hsa-mir-671 | H2AFX    | 0.301697877 mirna_pc |
| 12245 hsa-mir-671 | PSMD14   | 0.373337069 mirna_pc |
| 12246 hsa-mir-671 | C15orf42 | 0.383131796 mirna_pc |
| 12247 hsa-mir-671 | CENPN    | 0.417849216 mirna_pc |
| 12248 hsa-mir-671 | PTGES3   | 0.386221602 mirna_pc |
| 12249 hsa-mir-671 | PRIM2    | 0.319951084 mirna_pc |
| 12250 hsa-mir-671 | FAM60A   | 0.338849466 mirna_pc |
| 12251 hsa-mir-671 | HMGB3    | 0.361669644 mirna_pc |
| 12252 hsa-mir-671 | ATAD5    | 0.312375601 mirna_pc |
| 12253 hsa-mir-671 | RANBP1   | 0.32413689 mirna_pc  |
| 12254 hsa-mir-671 | MTBP     | 0.342829798 mirna_pc |
| 12255 hsa-mir-671 | E2F1     | 0.326032614 mirna_pc |
| 12256 hsa-mir-671 | EIF4A3   | 0.355113821 mirna_pc |
| 12257 hsa-mir-671 | KIF20B   | 0.304467227 mirna_pc |

|                   |          |                      |
|-------------------|----------|----------------------|
| 12258 hsa-mir-671 | SNRPA    | 0.323470897 mirna_pc |
| 12259 hsa-mir-671 | FUS      | 0.371138452 mirna_pc |
| 12260 hsa-mir-671 | ATAD2    | 0.337222236 mirna_pc |
| 12261 hsa-mir-671 | DNAJC9   | 0.329737514 mirna_pc |
| 12262 hsa-mir-671 | RFC3     | 0.388482373 mirna_pc |
| 12263 hsa-mir-671 | CHAF1A   | 0.450414177 mirna_pc |
| 12264 hsa-mir-671 | GINS4    | 0.322959536 mirna_pc |
| 12265 hsa-mir-671 | ANP32E   | 0.318890721 mirna_pc |
| 12266 hsa-mir-671 | CENPO    | 0.41867485 mirna_pc  |
| 12267 hsa-mir-671 | XRCC2    | 0.517285474 mirna_pc |
| 12268 hsa-mir-671 | BID      | 0.303553658 mirna_pc |
| 12269 hsa-mir-671 | C19orf48 | 0.369334603 mirna_pc |
| 12270 hsa-mir-671 | TRIM59   | 0.472320144 mirna_pc |
| 12271 hsa-mir-671 | CENPL    | 0.415062296 mirna_pc |
| 12272 hsa-mir-671 | GEN1     | 0.357169093 mirna_pc |
| 12273 hsa-mir-671 | NUDT1    | 0.314592756 mirna_pc |
| 12274 hsa-mir-671 | HMGB2    | 0.390261638 mirna_pc |
| 12275 hsa-mir-671 | GINS2    | 0.340714905 mirna_pc |
| 12276 hsa-mir-671 | DNA2     | 0.355762687 mirna_pc |
| 12277 hsa-mir-671 | NOP56    | 0.353362384 mirna_pc |
| 12278 hsa-mir-671 | CSE1L    | 0.384040235 mirna_pc |
| 12279 hsa-mir-671 | DTYMK    | 0.301156162 mirna_pc |
| 12280 hsa-mir-671 | E2F7     | 0.348662834 mirna_pc |
| 12281 hsa-mir-671 | PRMT1    | 0.397717414 mirna_pc |
| 12282 hsa-mir-671 | MLF1IP   | 0.358644886 mirna_pc |
| 12283 hsa-mir-671 | RAVER1   | 0.391743338 mirna_pc |
| 12284 hsa-mir-671 | NOP2     | 0.434676769 mirna_pc |
| 12285 hsa-mir-671 | TCF19    | 0.334882635 mirna_pc |
| 12286 hsa-mir-671 | CAD      | 0.324867996 mirna_pc |
| 12287 hsa-mir-671 | ZFP64    | 0.420642595 mirna_pc |
| 12288 hsa-mir-671 | CDK2     | 0.463801994 mirna_pc |
| 12289 hsa-mir-671 | CDK4     | 0.426730858 mirna_pc |
| 12290 hsa-mir-671 | CHTF18   | 0.446504995 mirna_pc |
| 12291 hsa-mir-671 | HNRNPR   | 0.33211207 mirna_pc  |
| 12292 hsa-mir-671 | DLEU2    | 0.437394078 mirna_pc |
| 12293 hsa-mir-671 | PRIM1    | 0.350357988 mirna_pc |
| 12294 hsa-mir-671 | CENPH    | 0.404153882 mirna_pc |
| 12295 hsa-mir-671 | TCOF1    | 0.365360958 mirna_pc |
| 12296 hsa-mir-671 | CHAF1B   | 0.439356399 mirna_pc |
| 12297 hsa-mir-671 | NCAPG2   | 0.399726119 mirna_pc |
| 12298 hsa-mir-671 | MSH2     | 0.372834547 mirna_pc |
| 12299 hsa-mir-671 | PRPF19   | 0.321085472 mirna_pc |
| 12300 hsa-mir-671 | TOMM40   | 0.312327354 mirna_pc |
| 12301 hsa-mir-671 | CDC7     | 0.334887739 mirna_pc |
| 12302 hsa-mir-671 | INTS7    | 0.328932102 mirna_pc |
| 12303 hsa-mir-671 | SSB      | 0.318862896 mirna_pc |
| 12304 hsa-mir-671 | YDJC     | 0.32265074 mirna_pc  |
| 12305 hsa-mir-671 | PUS1     | 0.440984165 mirna_pc |
| 12306 hsa-mir-671 | NOL11    | 0.372400762 mirna_pc |
| 12307 hsa-mir-671 | HAUS8    | 0.421982624 mirna_pc |
| 12308 hsa-mir-671 | TMEM41A  | 0.301142691 mirna_pc |
| 12309 hsa-mir-671 | PSMB4    | 0.357467074 mirna_pc |
| 12310 hsa-mir-671 | RFC4     | 0.511821526 mirna_pc |
| 12311 hsa-mir-671 | FBX05    | 0.388086646 mirna_pc |



|                   |              |                      |
|-------------------|--------------|----------------------|
| 12312 hsa-mir-671 | FIGNL1       | 0.346961298 mirna_pc |
| 12313 hsa-mir-671 | E2F3         | 0.327532618 mirna_pc |
| 12314 hsa-mir-671 | CDC25A       | 0.364203565 mirna_pc |
| 12315 hsa-mir-671 | TOPBP1       | 0.399461578 mirna_pc |
| 12316 hsa-mir-671 | RAD54B       | 0.362707085 mirna_pc |
| 12317 hsa-mir-671 | DDX12        | 0.410423129 mirna_pc |
| 12318 hsa-mir-671 | DSCC1        | 0.328181279 mirna_pc |
| 12319 hsa-mir-671 | NUP37        | 0.424827782 mirna_pc |
| 12320 hsa-mir-671 | C13orf34     | 0.349621955 mirna_pc |
| 12321 hsa-mir-671 | MCM8         | 0.3275407 mirna_pc   |
| 12322 hsa-mir-671 | CPSF3        | 0.370103629 mirna_pc |
| 12323 hsa-mir-671 | PAQR4        | 0.315381396 mirna_pc |
| 12324 hsa-mir-671 | C21orf45     | 0.415777741 mirna_pc |
| 12325 hsa-mir-671 | PPM1G        | 0.316681874 mirna_pc |
| 12326 hsa-mir-671 | DNAJB11      | 0.438240787 mirna_pc |
| 12327 hsa-mir-671 | LOC100125556 | 0.316207595 mirna_pc |
| 12328 hsa-mir-671 | TFAP4        | 0.43862183 mirna_pc  |
| 12329 hsa-mir-671 | ZNF367       | 0.350691585 mirna_pc |
| 12330 hsa-mir-671 | PUS7         | 0.343838669 mirna_pc |
| 12331 hsa-mir-671 | RNPS1        | 0.340695755 mirna_pc |
| 12332 hsa-mir-671 | DAZAP1       | 0.304632511 mirna_pc |
| 12333 hsa-mir-671 | CBX8         | 0.343942912 mirna_pc |
| 12334 hsa-mir-671 | MASTL        | 0.303765887 mirna_pc |
| 12335 hsa-mir-671 | TBL1XR1      | 0.375085653 mirna_pc |
| 12336 hsa-mir-671 | TMEM201      | 0.353782379 mirna_pc |
| 12337 hsa-mir-671 | NCL          | 0.32140284 mirna_pc  |
| 12338 hsa-mir-671 | MRPL9        | 0.313147377 mirna_pc |
| 12339 hsa-mir-671 | SRRT         | 0.32043367 mirna_pc  |
| 12340 hsa-mir-671 | CACYBP       | 0.348608607 mirna_pc |
| 12341 hsa-mir-671 | SASS6        | 0.324306886 mirna_pc |
| 12342 hsa-mir-671 | ODF2         | 0.323230077 mirna_pc |
| 12343 hsa-mir-671 | C12orf32     | 0.377279689 mirna_pc |
| 12344 hsa-mir-671 | MRPL47       | 0.443201149 mirna_pc |
| 12345 hsa-mir-671 | DBF4B        | 0.319652902 mirna_pc |
| 12346 hsa-mir-671 | FBL          | 0.351568776 mirna_pc |
| 12347 hsa-mir-671 | DONSON       | 0.354827378 mirna_pc |
| 12348 hsa-mir-671 | STIP1        | 0.332900982 mirna_pc |
| 12349 hsa-mir-671 | HIST1H1E     | 0.347206039 mirna_pc |
| 12350 hsa-mir-671 | C13orf37     | 0.320849751 mirna_pc |
| 12351 hsa-mir-671 | HNRNPM       | 0.365977345 mirna_pc |
| 12352 hsa-mir-671 | LSM 12.00    | 0.341157151 mirna_pc |
| 12353 hsa-mir-671 | PNPT1        | 0.365762394 mirna_pc |
| 12354 hsa-mir-671 | TMPO         | 0.333267317 mirna_pc |
| 12355 hsa-mir-671 | SET          | 0.400313126 mirna_pc |
| 12356 hsa-mir-671 | POLR2H       | 0.406481113 mirna_pc |
| 12357 hsa-mir-671 | VBP1         | 0.361291639 mirna_pc |
| 12358 hsa-mir-671 | C3orf26      | 0.333455931 mirna_pc |
| 12359 hsa-mir-671 | GPR19        | 0.315395484 mirna_pc |
| 12360 hsa-mir-671 | LSG1         | 0.476094034 mirna_pc |
| 12361 hsa-mir-671 | POLE3        | 0.308509061 mirna_pc |
| 12362 hsa-mir-671 | GABPB1       | 0.313074151 mirna_pc |
| 12363 hsa-mir-671 | THOC6        | 0.343124544 mirna_pc |
| 12364 hsa-mir-671 | GMPS         | 0.472571616 mirna_pc |
| 12365 hsa-mir-671 | C3orf37      | 0.386874901 mirna_pc |

|                   |              |                      |
|-------------------|--------------|----------------------|
| 12366 hsa-mir-671 | DHX9         | 0.452398912 mirna_pc |
| 12367 hsa-mir-671 | CCDC138      | 0.38373522 mirna_pc  |
| 12368 hsa-mir-671 | LOC100128191 | 0.391148029 mirna_pc |
| 12369 hsa-mir-671 | MRPL3        | 0.418778711 mirna_pc |
| 12370 hsa-mir-671 | HMG2         | 0.324777415 mirna_pc |
| 12371 hsa-mir-671 | MORC2        | 0.387260653 mirna_pc |
| 12372 hsa-mir-671 | SOSTDC1      | 0.316481126 mirna_pc |
| 12373 hsa-mir-671 | SMYD5        | 0.383504238 mirna_pc |
| 12374 hsa-mir-671 | TSSC1        | 0.342150364 mirna_pc |
| 12375 hsa-mir-671 | POLA2        | 0.4108651 mirna_pc   |
| 12376 hsa-mir-671 | CCDC77       | 0.391797319 mirna_pc |
| 12377 hsa-mir-671 | SFRS1        | 0.391631861 mirna_pc |
| 12378 hsa-mir-671 | TEX10        | 0.340359937 mirna_pc |
| 12379 hsa-mir-671 | WDR43        | 0.368635574 mirna_pc |
| 12380 hsa-mir-671 | SNRPA1       | 0.334919743 mirna_pc |
| 12381 hsa-mir-671 | CCDC58       | 0.360864949 mirna_pc |
| 12382 hsa-mir-671 | SKP2         | 0.326960986 mirna_pc |
| 12383 hsa-mir-671 | UBE2I        | 0.304464703 mirna_pc |
| 12384 hsa-mir-671 | TIPIN        | 0.369256196 mirna_pc |
| 12385 hsa-mir-671 | POLD2        | 0.311341985 mirna_pc |
| 12386 hsa-mir-671 | SMARCD1      | 0.429167419 mirna_pc |
| 12387 hsa-mir-671 | ATXN2L       | 0.301068432 mirna_pc |
| 12388 hsa-mir-671 | C4orf46      | 0.336983834 mirna_pc |
| 12389 hsa-mir-671 | ECE2         | 0.420520131 mirna_pc |
| 12390 hsa-mir-671 | GPN1         | 0.35034664 mirna_pc  |
| 12391 hsa-mir-671 | RFC5         | 0.413347273 mirna_pc |
| 12392 hsa-mir-671 | HSPD1        | 0.320981541 mirna_pc |
| 12393 hsa-mir-671 | FANCG        | 0.346888229 mirna_pc |
| 12394 hsa-mir-671 | SSRP1        | 0.368864549 mirna_pc |
| 12395 hsa-mir-671 | POLR2D       | 0.320303659 mirna_pc |
| 12396 hsa-mir-671 | FTSJ2        | 0.350659269 mirna_pc |
| 12397 hsa-mir-671 | PA2G4        | 0.305667896 mirna_pc |
| 12398 hsa-mir-671 | EPT1         | 0.401791431 mirna_pc |
| 12399 hsa-mir-671 | KHDRBS1      | 0.407257849 mirna_pc |
| 12400 hsa-mir-671 | PDIA4        | 0.341882919 mirna_pc |
| 12401 hsa-mir-671 | YEATS2       | 0.398817969 mirna_pc |
| 12402 hsa-mir-671 | CCDC21       | 0.309576452 mirna_pc |
| 12403 hsa-mir-671 | PHF5A        | 0.387213277 mirna_pc |
| 12404 hsa-mir-671 | CCT7         | 0.362279514 mirna_pc |
| 12405 hsa-mir-671 | TMEM194A     | 0.432351399 mirna_pc |
| 12406 hsa-mir-671 | MED30        | 0.31480829 mirna_pc  |
| 12407 hsa-mir-671 | METTL1       | 0.33675505 mirna_pc  |
| 12408 hsa-mir-671 | TTC26        | 0.396474519 mirna_pc |
| 12409 hsa-mir-671 | NEDD1        | 0.338166851 mirna_pc |
| 12410 hsa-mir-671 | PSMA1        | 0.394412318 mirna_pc |
| 12411 hsa-mir-671 | CENPJ        | 0.376853982 mirna_pc |
| 12412 hsa-mir-671 | NSUN5        | 0.357436908 mirna_pc |
| 12413 hsa-mir-671 | LIN9         | 0.348669212 mirna_pc |
| 12414 hsa-mir-671 | NAT10        | 0.343324318 mirna_pc |
| 12415 hsa-mir-671 | YWHAG        | 0.386290215 mirna_pc |
| 12416 hsa-mir-671 | WRAP53       | 0.319505075 mirna_pc |
| 12417 hsa-mir-671 | HNRNPU       | 0.388677767 mirna_pc |
| 12418 hsa-mir-671 | CCDC86       | 0.359218621 mirna_pc |
| 12419 hsa-mir-671 | ZNF280C      | 0.38715877 mirna_pc  |

|                   |          |                      |
|-------------------|----------|----------------------|
| 12420 hsa-mir-671 | CBX4     | 0.309669444 mirna_pc |
| 12421 hsa-mir-671 | POLR1B   | 0.369638437 mirna_pc |
| 12422 hsa-mir-671 | USP39    | 0.359337407 mirna_pc |
| 12423 hsa-mir-671 | WDR76    | 0.316890921 mirna_pc |
| 12424 hsa-mir-671 | DENR     | 0.327434966 mirna_pc |
| 12425 hsa-mir-671 | EXOSC2   | 0.341024612 mirna_pc |
| 12426 hsa-mir-671 | HMGXB4   | 0.398552229 mirna_pc |
| 12427 hsa-mir-671 | C11orf84 | 0.347066739 mirna_pc |
| 12428 hsa-mir-671 | TBCE     | 0.306924023 mirna_pc |
| 12429 hsa-mir-671 | NCBP2    | 0.443328231 mirna_pc |
| 12430 hsa-mir-671 | SUV39H2  | 0.375452321 mirna_pc |
| 12431 hsa-mir-671 | NKRF     | 0.31222723 mirna_pc  |
| 12432 hsa-mir-671 | ZC3H8    | 0.308170045 mirna_pc |
| 12433 hsa-mir-671 | HNRNP    | 0.303297994 mirna_pc |
| 12434 hsa-mir-671 | MTHFD2   | 0.433674791 mirna_pc |
| 12435 hsa-mir-671 | REXO4    | 0.30705112 mirna_pc  |
| 12436 hsa-mir-671 | MEN1     | 0.324012714 mirna_pc |
| 12437 hsa-mir-671 | HIFX     | 0.376425611 mirna_pc |
| 12438 hsa-mir-671 | PNO1     | 0.405241559 mirna_pc |
| 12439 hsa-mir-671 | CCT4     | 0.397314823 mirna_pc |
| 12440 hsa-mir-671 | UMPS     | 0.383883174 mirna_pc |
| 12441 hsa-mir-671 | CASP2    | 0.374585864 mirna_pc |
| 12442 hsa-mir-671 | ELAVL1   | 0.380667523 mirna_pc |
| 12443 hsa-mir-671 | RPN1     | 0.346853675 mirna_pc |
| 12444 hsa-mir-671 | NCAPD3   | 0.331496271 mirna_pc |
| 12445 hsa-mir-671 | HSP90B1  | 0.325255792 mirna_pc |
| 12446 hsa-mir-671 | PSMC3IP  | 0.393994267 mirna_pc |
| 12447 hsa-mir-671 | RPAP3    | 0.357048913 mirna_pc |
| 12448 hsa-mir-671 | NUDT15   | 0.302391463 mirna_pc |
| 12449 hsa-mir-671 | PES 1.00 | 0.345092381 mirna_pc |
| 12450 hsa-mir-671 | PAK2     | 0.428209321 mirna_pc |
| 12451 hsa-mir-671 | E2F4     | 0.344476655 mirna_pc |
| 12452 hsa-mir-671 | PSMD2    | 0.451620858 mirna_pc |
| 12453 hsa-mir-671 | PGAM5    | 0.322062485 mirna_pc |
| 12454 hsa-mir-671 | ATP13A3  | 0.425000077 mirna_pc |
| 12455 hsa-mir-671 | YWHAE    | 0.414424465 mirna_pc |
| 12456 hsa-mir-671 | DHFR     | 0.456575101 mirna_pc |
| 12457 hsa-mir-671 | NAA25    | 0.365088399 mirna_pc |
| 12458 hsa-mir-671 | PDCL3    | 0.30989191 mirna_pc  |
| 12459 hsa-mir-671 | ILF3     | 0.376644559 mirna_pc |
| 12460 hsa-mir-671 | ADCY3    | 0.36242921 mirna_pc  |
| 12461 hsa-mir-671 | C1orf96  | 0.33873467 mirna_pc  |
| 12462 hsa-mir-671 | GLE1     | 0.34301689 mirna_pc  |
| 12463 hsa-mir-671 | HSPBAP1  | 0.301658363 mirna_pc |
| 12464 hsa-mir-671 | WDR4     | 0.320075377 mirna_pc |
| 12465 hsa-mir-671 | MAGOHB   | 0.402762524 mirna_pc |
| 12466 hsa-mir-671 | UBAP2L   | 0.301076951 mirna_pc |
| 12467 hsa-mir-671 | NUP205   | 0.430839478 mirna_pc |
| 12468 hsa-mir-671 | GART     | 0.376048602 mirna_pc |
| 12469 hsa-mir-671 | DEK      | 0.350106931 mirna_pc |
| 12470 hsa-mir-671 | SFRS9    | 0.314034357 mirna_pc |
| 12471 hsa-mir-671 | PDCD10   | 0.324903944 mirna_pc |
| 12472 hsa-mir-671 | ATR      | 0.387241705 mirna_pc |
| 12473 hsa-mir-671 | OLA1     | 0.304766737 mirna_pc |

|                   |          |                      |
|-------------------|----------|----------------------|
| 12474 hsa-mir-671 | VMA21    | 0.306754311 mirna_pc |
| 12475 hsa-mir-671 | KHSRP    | 0.369853993 mirna_pc |
| 12476 hsa-mir-671 | PRAME    | 0.304089364 mirna_pc |
| 12477 hsa-mir-671 | CBX2     | 0.315655806 mirna_pc |
| 12478 hsa-mir-671 | ISY1     | 0.39637948 mirna_pc  |
| 12479 hsa-mir-671 | FUBP1    | 0.336254719 mirna_pc |
| 12480 hsa-mir-671 | TCF20    | 0.308259673 mirna_pc |
| 12481 hsa-mir-671 | SUV39H1  | 0.358715198 mirna_pc |
| 12482 hsa-mir-671 | SART3    | 0.368351412 mirna_pc |
| 12483 hsa-mir-671 | SR140    | 0.422155292 mirna_pc |
| 12484 hsa-mir-671 | TRA2B    | 0.464341506 mirna_pc |
| 12485 hsa-mir-671 | RSRC1    | 0.461850289 mirna_pc |
| 12486 hsa-mir-671 | CEP152   | 0.345069945 mirna_pc |
| 12487 hsa-mir-671 | C15orf23 | 0.420662859 mirna_pc |
| 12488 hsa-mir-671 | ZC3HAV1L | 0.32536024 mirna_pc  |
| 12489 hsa-mir-671 | PRMT3    | 0.337073621 mirna_pc |
| 12490 hsa-mir-671 | PSMD12   | 0.411650053 mirna_pc |
| 12491 hsa-mir-671 | MOBK1B   | 0.35660232 mirna_pc  |
| 12492 hsa-mir-671 | ATP2C1   | 0.330845048 mirna_pc |
| 12493 hsa-mir-671 | C1QBP    | 0.371893135 mirna_pc |
| 12494 hsa-mir-671 | ENOPH1   | 0.328565618 mirna_pc |
| 12495 hsa-mir-671 | MAP6D1   | 0.341070629 mirna_pc |
| 12496 hsa-mir-671 | LAS1L    | 0.309674735 mirna_pc |
| 12497 hsa-mir-671 | C4orf43  | 0.362870064 mirna_pc |
| 12498 hsa-mir-671 | XRCC3    | 0.310026664 mirna_pc |
| 12499 hsa-mir-671 | YY1      | 0.324951774 mirna_pc |
| 12500 hsa-mir-671 | C16orf80 | 0.31304881 mirna_pc  |
| 12501 hsa-mir-671 | MYBBP1A  | 0.304041844 mirna_pc |
| 12502 hsa-mir-671 | C17orf96 | 0.310325482 mirna_pc |
| 12503 hsa-mir-671 | TUG1     | 0.304046552 mirna_pc |
| 12504 hsa-mir-671 | SFPQ     | 0.357284152 mirna_pc |
| 12505 hsa-mir-671 | CNOT3    | 0.385589928 mirna_pc |
| 12506 hsa-mir-671 | RHBDD3   | 0.413166471 mirna_pc |
| 12507 hsa-mir-671 | MPHOSPH9 | 0.338142457 mirna_pc |
| 12508 hsa-mir-671 | SHMT2    | 0.439906076 mirna_pc |
| 12509 hsa-mir-671 | POLA1    | 0.312155191 mirna_pc |
| 12510 hsa-mir-671 | GMNN     | 0.339134418 mirna_pc |
| 12511 hsa-mir-671 | EMG1     | 0.330751886 mirna_pc |
| 12512 hsa-mir-671 | M6PR     | 0.333043756 mirna_pc |
| 12513 hsa-mir-671 | HAT1     | 0.329293832 mirna_pc |
| 12514 hsa-mir-671 | WDR53    | 0.392667682 mirna_pc |
| 12515 hsa-mir-671 | ALOX12P2 | 0.411393126 mirna_pc |
| 12516 hsa-mir-671 | ANKRD32  | 0.360588327 mirna_pc |
| 12517 hsa-mir-671 | RNF7     | 0.365677309 mirna_pc |
| 12518 hsa-mir-671 | DUT      | 0.348946845 mirna_pc |
| 12519 hsa-mir-671 | AP2M1    | 0.36138993 mirna_pc  |
| 12520 hsa-mir-671 | HPRT1    | 0.314549768 mirna_pc |
| 12521 hsa-mir-671 | CRIP1    | 0.304869305 mirna_pc |
| 12522 hsa-mir-671 | COX4NB   | 0.333187282 mirna_pc |
| 12523 hsa-mir-671 | MSH6     | 0.470755852 mirna_pc |
| 12524 hsa-mir-671 | HOXD11   | 0.312835223 mirna_pc |
| 12525 hsa-mir-671 | C3orf34  | 0.41644637 mirna_pc  |
| 12526 hsa-mir-671 | KPNB1    | 0.333820632 mirna_pc |
| 12527 hsa-mir-671 | XRCC6    | 0.387285254 mirna_pc |

|                   |           |                      |
|-------------------|-----------|----------------------|
| 12528 hsa-mir-671 | SMC3      | 0.311653021 mirna_pc |
| 12529 hsa-mir-671 | ACBD6     | 0.319599446 mirna_pc |
| 12530 hsa-mir-671 | CDK2AP1   | 0.370110556 mirna_pc |
| 12531 hsa-mir-671 | TPI1      | 0.309157901 mirna_pc |
| 12532 hsa-mir-671 | MOGS      | 0.300549413 mirna_pc |
| 12533 hsa-mir-671 | COIL      | 0.314266314 mirna_pc |
| 12534 hsa-mir-671 | HOXD10    | 0.30924964 mirna_pc  |
| 12535 hsa-mir-671 | RFC2      | 0.428542481 mirna_pc |
| 12536 hsa-mir-671 | TAF5      | 0.332756884 mirna_pc |
| 12537 hsa-mir-671 | TRIM28    | 0.321692714 mirna_pc |
| 12538 hsa-mir-671 | FANCC     | 0.300073884 mirna_pc |
| 12539 hsa-mir-671 | NAA15     | 0.303648569 mirna_pc |
| 12540 hsa-mir-671 | POLR3K    | 0.331469409 mirna_pc |
| 12541 hsa-mir-671 | PPHLN1    | 0.378956019 mirna_pc |
| 12542 hsa-mir-671 | CBX1      | 0.344699166 mirna_pc |
| 12543 hsa-mir-671 | SNAPC1    | 0.347116759 mirna_pc |
| 12544 hsa-mir-671 | HMGB1     | 0.329057133 mirna_pc |
| 12545 hsa-mir-671 | DIAPH3    | 0.321226777 mirna_pc |
| 12546 hsa-mir-671 | LOC642846 | 0.394511789 mirna_pc |
| 12547 hsa-mir-671 | TGIF2     | 0.318294124 mirna_pc |
| 12548 hsa-mir-671 | ZC3H18    | 0.372294745 mirna_pc |
| 12549 hsa-mir-671 | CHERP     | 0.337986086 mirna_pc |
| 12550 hsa-mir-671 | SENPI     | 0.331126853 mirna_pc |
| 12551 hsa-mir-671 | RCN2      | 0.418156085 mirna_pc |
| 12552 hsa-mir-671 | THUMP2    | 0.345804521 mirna_pc |
| 12553 hsa-mir-671 | ORC3L     | 0.350617898 mirna_pc |
| 12554 hsa-mir-671 | TARBP2    | 0.339839787 mirna_pc |
| 12555 hsa-mir-671 | TOMM22    | 0.323262613 mirna_pc |
| 12556 hsa-mir-671 | NOL10     | 0.328262238 mirna_pc |
| 12557 hsa-mir-671 | DDX47     | 0.40612141 mirna_pc  |
| 12558 hsa-mir-671 | POLE      | 0.376006451 mirna_pc |
| 12559 hsa-mir-671 | ODC1      | 0.30402849 mirna_pc  |
| 12560 hsa-mir-671 | MBD4      | 0.402003503 mirna_pc |
| 12561 hsa-mir-671 | ERF       | 0.314620678 mirna_pc |
| 12562 hsa-mir-671 | PIAS2     | 0.305283252 mirna_pc |
| 12563 hsa-mir-671 | TIMM50    | 0.323547597 mirna_pc |
| 12564 hsa-mir-671 | XRCC6BP1  | 0.327664358 mirna_pc |
| 12565 hsa-mir-671 | ADSL      | 0.431003735 mirna_pc |
| 12566 hsa-mir-671 | EXOSC9    | 0.300800918 mirna_pc |
| 12567 hsa-mir-671 | TMEM209   | 0.37864796 mirna_pc  |
| 12568 hsa-mir-671 | MPHOSPH6  | 0.34237533 mirna_pc  |
| 12569 hsa-mir-671 | UNG       | 0.415110273 mirna_pc |
| 12570 hsa-mir-671 | RBMX      | 0.380150504 mirna_pc |
| 12571 hsa-mir-671 | TSEN15    | 0.405052083 mirna_pc |
| 12572 hsa-mir-671 | CDK16     | 0.31414537 mirna_pc  |
| 12573 hsa-mir-671 | USP10     | 0.341999927 mirna_pc |
| 12574 hsa-mir-671 | TCTEX1D2  | 0.327136873 mirna_pc |
| 12575 hsa-mir-671 | PYCR2     | 0.318024764 mirna_pc |
| 12576 hsa-mir-671 | DAP3      | 0.359012748 mirna_pc |
| 12577 hsa-mir-671 | IQCB1     | 0.325614278 mirna_pc |
| 12578 hsa-mir-671 | LOC374443 | 0.326610315 mirna_pc |
| 12579 hsa-mir-671 | PRKCSH    | 0.327090389 mirna_pc |
| 12580 hsa-mir-671 | MLF 2.00  | 0.33481592 mirna_pc  |
| 12581 hsa-mir-671 | RPL39L    | 0.39543857 mirna_pc  |

|                   |           |                      |
|-------------------|-----------|----------------------|
| 12582 hsa-mir-671 | NAA50     | 0.307078222 mirna_pc |
| 12583 hsa-mir-671 | PDIA6     | 0.312979469 mirna_pc |
| 12584 hsa-mir-671 | GPN3      | 0.415148427 mirna_pc |
| 12585 hsa-mir-671 | APOBEC3F  | 0.306730043 mirna_pc |
| 12586 hsa-mir-671 | LOC152217 | 0.365912488 mirna_pc |
| 12587 hsa-mir-671 | MEMO1     | 0.308917836 mirna_pc |
| 12588 hsa-mir-671 | UBXN2A    | 0.410107046 mirna_pc |
| 12589 hsa-mir-671 | DNAJC14   | 0.301932228 mirna_pc |
| 12590 hsa-mir-671 | COMMD2    | 0.452840354 mirna_pc |
| 12591 hsa-mir-671 | CIT       | 0.333301918 mirna_pc |
| 12592 hsa-mir-671 | TRAP1     | 0.360396213 mirna_pc |
| 12593 hsa-mir-671 | NUDT21    | 0.300473586 mirna_pc |
| 12594 hsa-mir-671 | MAGEF1    | 0.441071586 mirna_pc |
| 12595 hsa-mir-671 | PCGF6     | 0.315131787 mirna_pc |
| 12596 hsa-mir-671 | PWP1      | 0.302434704 mirna_pc |
| 12597 hsa-mir-671 | SMARCB1   | 0.36217996 mirna_pc  |
| 12598 hsa-mir-671 | DDX54     | 0.332131497 mirna_pc |
| 12599 hsa-mir-671 | CCT8      | 0.321828073 mirna_pc |
| 12600 hsa-mir-671 | U2AF1     | 0.315865351 mirna_pc |
| 12601 hsa-mir-671 | FAIM      | 0.315489142 mirna_pc |
| 12602 hsa-mir-671 | RPA1      | 0.382957067 mirna_pc |
| 12603 hsa-mir-671 | ZNF639    | 0.482487484 mirna_pc |
| 12604 hsa-mir-671 | TBCCD1    | 0.334365603 mirna_pc |
| 12605 hsa-mir-671 | FOXK2     | 0.302770607 mirna_pc |
| 12606 hsa-mir-671 | SLC25A17  | 0.308083853 mirna_pc |
| 12607 hsa-mir-671 | UBXN7     | 0.320361167 mirna_pc |
| 12608 hsa-mir-671 | LRPPRC    | 0.317834391 mirna_pc |
| 12609 hsa-mir-671 | ATN1      | 0.34410904 mirna_pc  |
| 12610 hsa-mir-671 | LMBR1     | 0.320871941 mirna_pc |
| 12611 hsa-mir-671 | RHEB      | 0.396014599 mirna_pc |
| 12612 hsa-mir-671 | DVL3      | 0.391158761 mirna_pc |
| 12613 hsa-mir-671 | CDC23     | 0.323913572 mirna_pc |
| 12614 hsa-mir-671 | C16orf63  | 0.333929513 mirna_pc |
| 12615 hsa-mir-671 | ABCF2     | 0.453267822 mirna_pc |
| 12616 hsa-mir-671 | C7orf44   | 0.305356458 mirna_pc |
| 12617 hsa-mir-671 | SUMO3     | 0.321872155 mirna_pc |
| 12618 hsa-mir-671 | RBM28     | 0.408331614 mirna_pc |
| 12619 hsa-mir-671 | FXR1      | 0.406355323 mirna_pc |
| 12620 hsa-mir-671 | BTG3      | 0.310812506 mirna_pc |
| 12621 hsa-mir-671 | WDR85     | 0.313399485 mirna_pc |
| 12622 hsa-mir-671 | MRPS22    | 0.435243131 mirna_pc |
| 12623 hsa-mir-671 | PSPH      | 0.330946781 mirna_pc |
| 12624 hsa-mir-671 | ABCB6     | 0.303713806 mirna_pc |
| 12625 hsa-mir-671 | TTL       | 0.304974775 mirna_pc |
| 12626 hsa-mir-671 | C13orf23  | 0.300306128 mirna_pc |
| 12627 hsa-mir-671 | TRMT61B   | 0.393738428 mirna_pc |
| 12628 hsa-mir-671 | TSFM      | 0.360401333 mirna_pc |
| 12629 hsa-mir-671 | DDX20     | 0.305550531 mirna_pc |
| 12630 hsa-mir-671 | DCUN1D1   | 0.418184057 mirna_pc |
| 12631 hsa-mir-671 | IFT80     | 0.374792455 mirna_pc |
| 12632 hsa-mir-671 | PAXIP1    | 0.354607796 mirna_pc |
| 12633 hsa-mir-671 | UBE2N     | 0.323469549 mirna_pc |
| 12634 hsa-mir-671 | BAZ1B     | 0.384343565 mirna_pc |
| 12635 hsa-mir-671 | PIGX      | 0.453383218 mirna_pc |

|                   |          |                      |
|-------------------|----------|----------------------|
| 12636 hsa-mir-671 | CHAC2    | 0.351720527 mirna_pc |
| 12637 hsa-mir-671 | PFN2     | 0.427744091 mirna_pc |
| 12638 hsa-mir-671 | ATP6V1E2 | 0.344113884 mirna_pc |
| 12639 hsa-mir-671 | LMLN     | 0.338854748 mirna_pc |
| 12640 hsa-mir-671 | E2F6     | 0.356441417 mirna_pc |
| 12641 hsa-mir-671 | DRG1     | 0.352283848 mirna_pc |
| 12642 hsa-mir-671 | PRPSAP2  | 0.408246616 mirna_pc |
| 12643 hsa-mir-671 | SENP3    | 0.356481975 mirna_pc |
| 12644 hsa-mir-671 | ACTR6    | 0.359506161 mirna_pc |
| 12645 hsa-mir-671 | STARD7   | 0.363045848 mirna_pc |
| 12646 hsa-mir-671 | CCDC59   | 0.307767381 mirna_pc |
| 12647 hsa-mir-671 | SLC4A1AP | 0.327784025 mirna_pc |
| 12648 hsa-mir-671 | TTC27    | 0.3032965 mirna_pc   |
| 12649 hsa-mir-671 | MCCC1    | 0.318068007 mirna_pc |
| 12650 hsa-mir-671 | MTIF2    | 0.354247951 mirna_pc |
| 12651 hsa-mir-671 | HNRNPA3  | 0.302576538 mirna_pc |
| 12652 hsa-mir-671 | EWSR1    | 0.391280952 mirna_pc |
| 12653 hsa-mir-671 | KRR1     | 0.313058868 mirna_pc |
| 12654 hsa-mir-671 | AAAS     | 0.374279354 mirna_pc |
| 12655 hsa-mir-671 | QSER1    | 0.302694734 mirna_pc |
| 12656 hsa-mir-671 | CHST14   | 0.316303277 mirna_pc |
| 12657 hsa-mir-671 | RNF168   | 0.300119267 mirna_pc |
| 12658 hsa-mir-671 | DHX36    | 0.385374407 mirna_pc |
| 12659 hsa-mir-671 | SUPT7L   | 0.316879332 mirna_pc |
| 12660 hsa-mir-671 | SMUG1    | 0.346030798 mirna_pc |
| 12661 hsa-mir-671 | MRPS26   | 0.311397062 mirna_pc |
| 12662 hsa-mir-671 | MRPL30   | 0.359467047 mirna_pc |
| 12663 hsa-mir-671 | GFM1     | 0.346807775 mirna_pc |
| 12664 hsa-mir-671 | PELP1    | 0.386875948 mirna_pc |
| 12665 hsa-mir-671 | PPP1R2P3 | 0.310057117 mirna_pc |
| 12666 hsa-mir-671 | C11orf45 | 0.32695665 mirna_pc  |
| 12667 hsa-mir-671 | TSGA14   | 0.350054379 mirna_pc |
| 12668 hsa-mir-671 | HSCB     | 0.353434475 mirna_pc |
| 12669 hsa-mir-671 | SFRS7    | 0.305483473 mirna_pc |
| 12670 hsa-mir-671 | MRPL42   | 0.378926359 mirna_pc |
| 12671 hsa-mir-671 | COPB2    | 0.403645895 mirna_pc |
| 12672 hsa-mir-671 | CA5BP    | 0.327829452 mirna_pc |
| 12673 hsa-mir-671 | TRMT2A   | 0.350296317 mirna_pc |
| 12674 hsa-mir-671 | PCBP2    | 0.334418008 mirna_pc |
| 12675 hsa-mir-671 | UBE20    | 0.340496216 mirna_pc |
| 12676 hsa-mir-671 | MYPOP    | 0.315686536 mirna_pc |
| 12677 hsa-mir-671 | C10orf35 | 0.350953209 mirna_pc |
| 12678 hsa-mir-671 | COQ3     | 0.309076654 mirna_pc |
| 12679 hsa-mir-671 | HLTF     | 0.367041203 mirna_pc |
| 12680 hsa-mir-671 | BLMH     | 0.31498455 mirna_pc  |
| 12681 hsa-mir-671 | NUP88    | 0.308548337 mirna_pc |
| 12682 hsa-mir-671 | KPNA4    | 0.392507435 mirna_pc |
| 12683 hsa-mir-671 | RPUSD2   | 0.318728026 mirna_pc |
| 12684 hsa-mir-671 | ABCF3    | 0.361609846 mirna_pc |
| 12685 hsa-mir-671 | ZNF786   | 0.310638261 mirna_pc |
| 12686 hsa-mir-671 | EIF2B5   | 0.406620704 mirna_pc |
| 12687 hsa-mir-671 | NIPSNAP1 | 0.309462593 mirna_pc |
| 12688 hsa-mir-671 | PARL     | 0.413119921 mirna_pc |
| 12689 hsa-mir-671 | PCCB     | 0.334404186 mirna_pc |

|                   |           |                      |
|-------------------|-----------|----------------------|
| 12690 hsa-mir-671 | RPL35A    | 0.311315644 mirna_pc |
| 12691 hsa-mir-671 | AEBP2     | 0.327594957 mirna_pc |
| 12692 hsa-mir-671 | EIF4G1    | 0.37103987 mirna_pc  |
| 12693 hsa-mir-671 | C12orf10  | 0.300952065 mirna_pc |
| 12694 hsa-mir-671 | TMEM81    | 0.33213819 mirna_pc  |
| 12695 hsa-mir-671 | PPP1R2    | 0.339789964 mirna_pc |
| 12696 hsa-mir-671 | C2orf44   | 0.324774279 mirna_pc |
| 12697 hsa-mir-671 | LOC440173 | 0.318226667 mirna_pc |
| 12698 hsa-mir-671 | PIK3R4    | 0.316750274 mirna_pc |
| 12699 hsa-mir-671 | PSMB6     | 0.311039045 mirna_pc |
| 12700 hsa-mir-671 | SEPHS1    | 0.315230628 mirna_pc |
| 12701 hsa-mir-671 | TMEM17    | 0.300710873 mirna_pc |
| 12702 hsa-mir-671 | RYK       | 0.367623165 mirna_pc |
| 12703 hsa-mir-671 | TMEM11    | 0.355026941 mirna_pc |
| 12704 hsa-mir-671 | USP5      | 0.314100101 mirna_pc |
| 12705 hsa-mir-671 | BOLA3     | 0.32512244 mirna_pc  |
| 12706 hsa-mir-671 | TOP3B     | 0.310108695 mirna_pc |
| 12707 hsa-mir-671 | LARP4     | 0.318083985 mirna_pc |
| 12708 hsa-mir-671 | PHB2      | 0.327247901 mirna_pc |
| 12709 hsa-mir-671 | PDCD7     | 0.337303979 mirna_pc |
| 12710 hsa-mir-671 | NRF1      | 0.31000761 mirna_pc  |
| 12711 hsa-mir-671 | BRD4      | 0.330264016 mirna_pc |
| 12712 hsa-mir-671 | ZNF282    | 0.341122982 mirna_pc |
| 12713 hsa-mir-671 | SENP5     | 0.404830259 mirna_pc |
| 12714 hsa-mir-671 | HNRNPUL1  | 0.313590544 mirna_pc |
| 12715 hsa-mir-671 | ZNF384    | 0.31208578 mirna_pc  |
| 12716 hsa-mir-671 | TXNRD1    | 0.331077151 mirna_pc |
| 12717 hsa-mir-671 | BCL11A    | 0.308598421 mirna_pc |
| 12718 hsa-mir-671 | LUC7L2    | 0.36189885 mirna_pc  |
| 12719 hsa-mir-671 | FAH       | 0.304642636 mirna_pc |
| 12720 hsa-mir-671 | ACAD9     | 0.336998492 mirna_pc |
| 12721 hsa-mir-671 | FAM98B    | 0.344368095 mirna_pc |
| 12722 hsa-mir-671 | LRFN1     | 0.310490137 mirna_pc |
| 12723 hsa-mir-671 | PEX5      | 0.302091085 mirna_pc |
| 12724 hsa-mir-671 | SRPRB     | 0.357822574 mirna_pc |
| 12725 hsa-mir-671 | ARMC8     | 0.311124676 mirna_pc |
| 12726 hsa-mir-671 | C12orf41  | 0.387535432 mirna_pc |
| 12727 hsa-mir-671 | TFDP2     | 0.339532221 mirna_pc |
| 12728 hsa-mir-671 | FYTDD1    | 0.350037345 mirna_pc |
| 12729 hsa-mir-671 | C3orf58   | 0.301595757 mirna_pc |
| 12730 hsa-mir-671 | FKBP4     | 0.350367379 mirna_pc |
| 12731 hsa-mir-671 | HSPA9     | 0.347018978 mirna_pc |
| 12732 hsa-mir-671 | USP13     | 0.334914784 mirna_pc |
| 12733 hsa-mir-671 | TSR1      | 0.303948367 mirna_pc |
| 12734 hsa-mir-671 | CUL1      | 0.344166358 mirna_pc |
| 12735 hsa-mir-671 | UGT1A6    | 0.320603325 mirna_pc |
| 12736 hsa-mir-671 | SELT      | 0.32016432 mirna_pc  |
| 12737 hsa-mir-671 | DDX51     | 0.321509601 mirna_pc |
| 12738 hsa-mir-671 | EIF2A     | 0.36673057 mirna_pc  |
| 12739 hsa-mir-671 | SENP2     | 0.406712775 mirna_pc |
| 12740 hsa-mir-671 | UXS1      | 0.316005512 mirna_pc |
| 12741 hsa-mir-671 | TRIM16L   | 0.355810309 mirna_pc |
| 12742 hsa-mir-671 | FAM169A   | 0.359751768 mirna_pc |
| 12743 hsa-mir-671 | EIF2AK4   | 0.31411494 mirna_pc  |



|                     |           |                      |
|---------------------|-----------|----------------------|
| 12744 hsa-mir-671   | GTF2IP1   | 0.329246958 mirna_pc |
| 12745 hsa-mir-671   | C21orf91  | 0.351518545 mirna_pc |
| 12746 hsa-mir-671   | SPATS2    | 0.320944644 mirna_pc |
| 12747 hsa-mir-671   | DNAJA3    | 0.315705245 mirna_pc |
| 12748 hsa-mir-671   | USP28     | 0.320482877 mirna_pc |
| 12749 hsa-mir-671   | POM121C   | 0.425788914 mirna_pc |
| 12750 hsa-mir-671   | DZIP1L    | 0.313589139 mirna_pc |
| 12751 hsa-mir-671   | PAX6      | 0.31511488 mirna_pc  |
| 12752 hsa-mir-671   | MRPS33    | 0.302960359 mirna_pc |
| 12753 hsa-mir-671   | RRP7B     | 0.331952748 mirna_pc |
| 12754 hsa-mir-671   | DNAJC19   | 0.388072904 mirna_pc |
| 12755 hsa-mir-671   | CEP70     | 0.324342879 mirna_pc |
| 12756 hsa-mir-671   | OPA1      | 0.433411754 mirna_pc |
| 12757 hsa-mir-671   | SCML2     | 0.333677501 mirna_pc |
| 12758 hsa-mir-671   | STRAP     | 0.38056962 mirna_pc  |
| 12759 hsa-mir-671   | C12orf65  | 0.422775659 mirna_pc |
| 12760 hsa-mir-671   | MRPL19    | 0.428833606 mirna_pc |
| 12761 hsa-mir-671   | GTF2I     | 0.336091243 mirna_pc |
| 12762 hsa-mir-671   | CNBP      | 0.306662741 mirna_pc |
| 12763 hsa-mir-671   | KATNAL2   | 0.308564054 mirna_pc |
| 12764 hsa-mir-671   | LOC220729 | 0.305127478 mirna_pc |
| 12765 hsa-mir-671   | B9D1      | 0.354376067 mirna_pc |
| 12766 hsa-mir-671   | DDX1      | 0.328166914 mirna_pc |
| 12767 hsa-mir-671   | WBSCR16   | 0.385712082 mirna_pc |
| 12768 hsa-mir-671   | ACP1      | 0.330715222 mirna_pc |
| 12769 hsa-mir-671   | ASF1A     | 0.308001212 mirna_pc |
| 12770 hsa-mir-671   | SSR3      | 0.336635447 mirna_pc |
| 12771 hsa-mir-671   | C7orf49   | 0.352430362 mirna_pc |
| 12772 hsa-mir-671   | ACTR3B    | 0.389417363 mirna_pc |
| 12773 hsa-mir-671   | NOM1      | 0.382182655 mirna_pc |
| 12774 hsa-mir-671   | NDUFB5    | 0.348207984 mirna_pc |
| 12775 hsa-mir-671   | TUSC3     | 0.340958037 mirna_pc |
| 12776 hsa-mir-671   | SLC35B4   | 0.33020267 mirna_pc  |
| 12777 hsa-mir-671   | AGK       | 0.382788786 mirna_pc |
| 12778 hsa-mir-671   | ANAPC5    | 0.318805442 mirna_pc |
| 12779 hsa-mir-671   | MBD6      | 0.316219075 mirna_pc |
| 12780 hsa-mir-671   | IER3IP1   | 0.312479857 mirna_pc |
| 12781 hsa-mir-671   | VPS37D    | 0.300546469 mirna_pc |
| 12782 hsa-mir-671   | SEMA4C    | 0.317506726 mirna_pc |
| 12783 hsa-mir-671   | MARS      | 0.335412141 mirna_pc |
| 12784 hsa-mir-671   | COPS3     | 0.359066338 mirna_pc |
| 12785 hsa-mir-671   | ZNF777    | 0.330235641 mirna_pc |
| 12786 hsa-mir-671   | CKAP4     | 0.304688397 mirna_pc |
| 12787 hsa-mir-671   | MFF       | 0.302234995 mirna_pc |
| 12788 hsa-mir-671   | C12orf73  | 0.300136333 mirna_pc |
| 12789 hsa-mir-671   | C3orf33   | 0.337570068 mirna_pc |
| 12790 hsa-mir-671   | POM121    | 0.383822387 mirna_pc |
| 12791 hsa-mir-19b-1 | MKI67     | 0.306769933 mirna_pc |
| 12792 hsa-mir-19b-1 | TOP2A     | 0.332254448 mirna_pc |
| 12793 hsa-mir-19b-1 | CENPF     | 0.324318208 mirna_pc |
| 12794 hsa-mir-19b-1 | RCC2      | 0.329147435 mirna_pc |
| 12795 hsa-mir-19b-1 | KIF11     | 0.321078483 mirna_pc |
| 12796 hsa-mir-19b-1 | RRM2      | 0.310777047 mirna_pc |
| 12797 hsa-mir-19b-1 | CDK1      | 0.329771135 mirna_pc |

|                     |           |                      |
|---------------------|-----------|----------------------|
| 12798 hsa-mir-19b-1 | MYBL2     | 0.323074981 mirna_pc |
| 12799 hsa-mir-19b-1 | UBE2C     | 0.325478093 mirna_pc |
| 12800 hsa-mir-19b-1 | BUB1      | 0.353019983 mirna_pc |
| 12801 hsa-mir-19b-1 | BUB1B     | 0.341742376 mirna_pc |
| 12802 hsa-mir-19b-1 | HDGF      | 0.304028436 mirna_pc |
| 12803 hsa-mir-19b-1 | KIF18B    | 0.302125199 mirna_pc |
| 12804 hsa-mir-19b-1 | ASPM      | 0.309712109 mirna_pc |
| 12805 hsa-mir-19b-1 | CKAP2     | 0.342702195 mirna_pc |
| 12806 hsa-mir-19b-1 | KIF2C     | 0.303723253 mirna_pc |
| 12807 hsa-mir-19b-1 | FANCA     | 0.498739659 mirna_pc |
| 12808 hsa-mir-19b-1 | NCAPG     | 0.327748713 mirna_pc |
| 12809 hsa-mir-19b-1 | SGOL1     | 0.379652722 mirna_pc |
| 12810 hsa-mir-19b-1 | ARHGAP11A | 0.389961613 mirna_pc |
| 12811 hsa-mir-19b-1 | CCNA2     | 0.300650591 mirna_pc |
| 12812 hsa-mir-19b-1 | CDC25B    | 0.348651725 mirna_pc |
| 12813 hsa-mir-19b-1 | CBX3      | 0.313596718 mirna_pc |
| 12814 hsa-mir-19b-1 | SPC25     | 0.400130784 mirna_pc |
| 12815 hsa-mir-19b-1 | NUP62     | 0.311289686 mirna_pc |
| 12816 hsa-mir-19b-1 | FANCI     | 0.309228858 mirna_pc |
| 12817 hsa-mir-19b-1 | NEK2      | 0.378680023 mirna_pc |
| 12818 hsa-mir-19b-1 | HOXC11    | 0.302171772 mirna_pc |
| 12819 hsa-mir-19b-1 | NCAPH     | 0.373111569 mirna_pc |
| 12820 hsa-mir-19b-1 | GTSE1     | 0.346370383 mirna_pc |
| 12821 hsa-mir-19b-1 | RAD54L    | 0.324430312 mirna_pc |
| 12822 hsa-mir-19b-1 | MAD2L1    | 0.3889445 mirna_pc   |
| 12823 hsa-mir-19b-1 | TIMELESS  | 0.31765924 mirna_pc  |
| 12824 hsa-mir-19b-1 | LMNB1     | 0.330720975 mirna_pc |
| 12825 hsa-mir-19b-1 | ASF1B     | 0.301551996 mirna_pc |
| 12826 hsa-mir-19b-1 | CDCA8     | 0.34833993 mirna_pc  |
| 12827 hsa-mir-19b-1 | CDCA5     | 0.303665033 mirna_pc |
| 12828 hsa-mir-19b-1 | XPO1      | 0.39022915 mirna_pc  |
| 12829 hsa-mir-19b-1 | CDCA2     | 0.33839972 mirna_pc  |
| 12830 hsa-mir-19b-1 | KNTC1     | 0.303746235 mirna_pc |
| 12831 hsa-mir-19b-1 | NUF2      | 0.302289928 mirna_pc |
| 12832 hsa-mir-19b-1 | PLK4      | 0.366816487 mirna_pc |
| 12833 hsa-mir-19b-1 | FANCB     | 0.360730061 mirna_pc |
| 12834 hsa-mir-19b-1 | DEPDC1    | 0.303544799 mirna_pc |
| 12835 hsa-mir-19b-1 | SKA3      | 0.482254729 mirna_pc |
| 12836 hsa-mir-19b-1 | KIF14     | 0.311386314 mirna_pc |
| 12837 hsa-mir-19b-1 | HJURP     | 0.443461107 mirna_pc |
| 12838 hsa-mir-19b-1 | BLM       | 0.389534795 mirna_pc |
| 12839 hsa-mir-19b-1 | DNMT1     | 0.340529204 mirna_pc |
| 12840 hsa-mir-19b-1 | PAICS     | 0.41355457 mirna_pc  |
| 12841 hsa-mir-19b-1 | CCDC150   | 0.376900716 mirna_pc |
| 12842 hsa-mir-19b-1 | LIG1      | 0.334294236 mirna_pc |
| 12843 hsa-mir-19b-1 | DTL       | 0.336569796 mirna_pc |
| 12844 hsa-mir-19b-1 | EME1      | 0.409013038 mirna_pc |
| 12845 hsa-mir-19b-1 | RECQL4    | 0.300336181 mirna_pc |
| 12846 hsa-mir-19b-1 | CENPK     | 0.342580631 mirna_pc |
| 12847 hsa-mir-19b-1 | CDT1      | 0.333366382 mirna_pc |
| 12848 hsa-mir-19b-1 | CBFB      | 0.356240644 mirna_pc |
| 12849 hsa-mir-19b-1 | MCM10     | 0.33031527 mirna_pc  |
| 12850 hsa-mir-19b-1 | SGOL2     | 0.315586371 mirna_pc |
| 12851 hsa-mir-19b-1 | CENPE     | 0.345959886 mirna_pc |

|                     |           |                      |
|---------------------|-----------|----------------------|
| 12852 hsa-mir-19b-1 | POLQ      | 0.331211624 mirna_pc |
| 12853 hsa-mir-19b-1 | KIF15     | 0.3402889 mirna_pc   |
| 12854 hsa-mir-19b-1 | Clorf112  | 0.394329625 mirna_pc |
| 12855 hsa-mir-19b-1 | GINS1     | 0.333823438 mirna_pc |
| 12856 hsa-mir-19b-1 | FEN1      | 0.33360618 mirna_pc  |
| 12857 hsa-mir-19b-1 | TRAIP     | 0.355058825 mirna_pc |
| 12858 hsa-mir-19b-1 | ORC6L     | 0.345930774 mirna_pc |
| 12859 hsa-mir-19b-1 | ARHGAP11B | 0.321110127 mirna_pc |
| 12860 hsa-mir-19b-1 | C16orf59  | 0.330320885 mirna_pc |
| 12861 hsa-mir-19b-1 | RAE1      | 0.321448685 mirna_pc |
| 12862 hsa-mir-19b-1 | FAM72D    | 0.305540124 mirna_pc |
| 12863 hsa-mir-19b-1 | FAM72B    | 0.324603542 mirna_pc |
| 12864 hsa-mir-19b-1 | EZH2      | 0.374293782 mirna_pc |
| 12865 hsa-mir-19b-1 | NEIL3     | 0.307799525 mirna_pc |
| 12866 hsa-mir-19b-1 | POLD1     | 0.389740697 mirna_pc |
| 12867 hsa-mir-19b-1 | C12orf48  | 0.334458431 mirna_pc |
| 12868 hsa-mir-19b-1 | ZWILCH    | 0.300322286 mirna_pc |
| 12869 hsa-mir-19b-1 | ZWINT     | 0.316079726 mirna_pc |
| 12870 hsa-mir-19b-1 | BUB3      | 0.309546976 mirna_pc |
| 12871 hsa-mir-19b-1 | HELLS     | 0.350405839 mirna_pc |
| 12872 hsa-mir-19b-1 | TCF3      | 0.416771629 mirna_pc |
| 12873 hsa-mir-19b-1 | CHEK1     | 0.317056467 mirna_pc |
| 12874 hsa-mir-19b-1 | BRCA1     | 0.345201684 mirna_pc |
| 12875 hsa-mir-19b-1 | PATL1     | 0.300395982 mirna_pc |
| 12876 hsa-mir-19b-1 | HNRNPA2B1 | 0.385280938 mirna_pc |
| 12877 hsa-mir-19b-1 | RFWD3     | 0.422330959 mirna_pc |
| 12878 hsa-mir-19b-1 | C20orf20  | 0.302807442 mirna_pc |
| 12879 hsa-mir-19b-1 | MCM6      | 0.458978739 mirna_pc |
| 12880 hsa-mir-19b-1 | CDCA7     | 0.425919657 mirna_pc |
| 12881 hsa-mir-19b-1 | MTHFD1L   | 0.331051417 mirna_pc |
| 12882 hsa-mir-19b-1 | FAM60A    | 0.356521277 mirna_pc |
| 12883 hsa-mir-19b-1 | ATAD5     | 0.339453082 mirna_pc |
| 12884 hsa-mir-19b-1 | FAM111B   | 0.303486289 mirna_pc |
| 12885 hsa-mir-19b-1 | KIF20B    | 0.33298218 mirna_pc  |
| 12886 hsa-mir-19b-1 | ESCO2     | 0.312448115 mirna_pc |
| 12887 hsa-mir-19b-1 | SNRPA     | 0.319002515 mirna_pc |
| 12888 hsa-mir-19b-1 | RFC3      | 0.464107407 mirna_pc |
| 12889 hsa-mir-19b-1 | CENPO     | 0.355056654 mirna_pc |
| 12890 hsa-mir-19b-1 | XRCC2     | 0.398353008 mirna_pc |
| 12891 hsa-mir-19b-1 | C19orf48  | 0.329416712 mirna_pc |
| 12892 hsa-mir-19b-1 | BRCA2     | 0.398598105 mirna_pc |
| 12893 hsa-mir-19b-1 | GEN1      | 0.431039109 mirna_pc |
| 12894 hsa-mir-19b-1 | HMGB2     | 0.391936722 mirna_pc |
| 12895 hsa-mir-19b-1 | DNA2      | 0.420701737 mirna_pc |
| 12896 hsa-mir-19b-1 | NOP56     | 0.438959676 mirna_pc |
| 12897 hsa-mir-19b-1 | DSN1      | 0.302352493 mirna_pc |
| 12898 hsa-mir-19b-1 | SNHG1     | 0.379307433 mirna_pc |
| 12899 hsa-mir-19b-1 | DTYMK     | 0.352710523 mirna_pc |
| 12900 hsa-mir-19b-1 | PRMT1     | 0.3549483 mirna_pc   |
| 12901 hsa-mir-19b-1 | RAVER1    | 0.343279047 mirna_pc |
| 12902 hsa-mir-19b-1 | HEATR1    | 0.327818578 mirna_pc |
| 12903 hsa-mir-19b-1 | RBL1      | 0.323646024 mirna_pc |
| 12904 hsa-mir-19b-1 | CAD       | 0.304700399 mirna_pc |
| 12905 hsa-mir-19b-1 | DLEU2     | 0.428892017 mirna_pc |

|                     |           |                      |
|---------------------|-----------|----------------------|
| 12906 hsa-mir-19b-1 | PRIM1     | 0.322930077 mirna_pc |
| 12907 hsa-mir-19b-1 | FERMT1    | 0.453625965 mirna_pc |
| 12908 hsa-mir-19b-1 | TCOF1     | 0.309024883 mirna_pc |
| 12909 hsa-mir-19b-1 | CHAF1B    | 0.300890724 mirna_pc |
| 12910 hsa-mir-19b-1 | NCAPG2    | 0.348718631 mirna_pc |
| 12911 hsa-mir-19b-1 | MSH2      | 0.342721589 mirna_pc |
| 12912 hsa-mir-19b-1 | SF3B3     | 0.379743314 mirna_pc |
| 12913 hsa-mir-19b-1 | CDC7      | 0.31073392 mirna_pc  |
| 12914 hsa-mir-19b-1 | SSB       | 0.442199385 mirna_pc |
| 12915 hsa-mir-19b-1 | PUS1      | 0.343352832 mirna_pc |
| 12916 hsa-mir-19b-1 | NOL11     | 0.33306253 mirna_pc  |
| 12917 hsa-mir-19b-1 | FBXO5     | 0.334568636 mirna_pc |
| 12918 hsa-mir-19b-1 | E2F3      | 0.386241782 mirna_pc |
| 12919 hsa-mir-19b-1 | DDX11     | 0.333026978 mirna_pc |
| 12920 hsa-mir-19b-1 | CDC25A    | 0.456216794 mirna_pc |
| 12921 hsa-mir-19b-1 | TMEM48    | 0.316985624 mirna_pc |
| 12922 hsa-mir-19b-1 | DSCC1     | 0.302583034 mirna_pc |
| 12923 hsa-mir-19b-1 | C13orf34  | 0.494177711 mirna_pc |
| 12924 hsa-mir-19b-1 | SRPK1     | 0.330921057 mirna_pc |
| 12925 hsa-mir-19b-1 | MCM8      | 0.444864008 mirna_pc |
| 12926 hsa-mir-19b-1 | ATIC      | 0.417205306 mirna_pc |
| 12927 hsa-mir-19b-1 | TFAP4     | 0.347613144 mirna_pc |
| 12928 hsa-mir-19b-1 | DAZAP1    | 0.320361625 mirna_pc |
| 12929 hsa-mir-19b-1 | CBX8      | 0.309483015 mirna_pc |
| 12930 hsa-mir-19b-1 | NCL       | 0.472876144 mirna_pc |
| 12931 hsa-mir-19b-1 | SRRT      | 0.304258932 mirna_pc |
| 12932 hsa-mir-19b-1 | FBL       | 0.307137188 mirna_pc |
| 12933 hsa-mir-19b-1 | C13orf37  | 0.422114778 mirna_pc |
| 12934 hsa-mir-19b-1 | HNRNPM    | 0.324559495 mirna_pc |
| 12935 hsa-mir-19b-1 | LSM 12.00 | 0.301974325 mirna_pc |
| 12936 hsa-mir-19b-1 | PNPT1     | 0.419012646 mirna_pc |
| 12937 hsa-mir-19b-1 | TMPO      | 0.370159823 mirna_pc |
| 12938 hsa-mir-19b-1 | LOC388796 | 0.332287212 mirna_pc |
| 12939 hsa-mir-19b-1 | SMPD4     | 0.3436935 mirna_pc   |
| 12940 hsa-mir-19b-1 | PPAT      | 0.323498116 mirna_pc |
| 12941 hsa-mir-19b-1 | DHX9      | 0.400737014 mirna_pc |
| 12942 hsa-mir-19b-1 | CCDC138   | 0.36093725 mirna_pc  |
| 12943 hsa-mir-19b-1 | CHRNA5    | 0.323713168 mirna_pc |
| 12944 hsa-mir-19b-1 | SFRS1     | 0.48788369 mirna_pc  |
| 12945 hsa-mir-19b-1 | WDR43     | 0.395177566 mirna_pc |
| 12946 hsa-mir-19b-1 | C4orf46   | 0.383245685 mirna_pc |
| 12947 hsa-mir-19b-1 | DARS2     | 0.337001865 mirna_pc |
| 12948 hsa-mir-19b-1 | UTP14A    | 0.351224334 mirna_pc |
| 12949 hsa-mir-19b-1 | C1orf107  | 0.313770556 mirna_pc |
| 12950 hsa-mir-19b-1 | HSPD1     | 0.421577875 mirna_pc |
| 12951 hsa-mir-19b-1 | SSRP1     | 0.333487682 mirna_pc |
| 12952 hsa-mir-19b-1 | POLR2D    | 0.369710316 mirna_pc |
| 12953 hsa-mir-19b-1 | FTSJ2     | 0.326964442 mirna_pc |
| 12954 hsa-mir-19b-1 | KHDRBS1   | 0.344087711 mirna_pc |
| 12955 hsa-mir-19b-1 | SLC5A6    | 0.387408128 mirna_pc |
| 12956 hsa-mir-19b-1 | PDIA4     | 0.346985409 mirna_pc |
| 12957 hsa-mir-19b-1 | TOMM34    | 0.399150854 mirna_pc |
| 12958 hsa-mir-19b-1 | TAF1A     | 0.307283817 mirna_pc |
| 12959 hsa-mir-19b-1 | PRPF40A   | 0.448401234 mirna_pc |

|                     |           |                      |
|---------------------|-----------|----------------------|
| 12960 hsa-mir-19b-1 | AHCY      | 0.326823194 mirna_pc |
| 12961 hsa-mir-19b-1 | SLC39A10  | 0.357612034 mirna_pc |
| 12962 hsa-mir-19b-1 | NOLC1     | 0.307796048 mirna_pc |
| 12963 hsa-mir-19b-1 | ZNF695    | 0.405610654 mirna_pc |
| 12964 hsa-mir-19b-1 | PDSS1     | 0.353008534 mirna_pc |
| 12965 hsa-mir-19b-1 | HAUS6     | 0.350075355 mirna_pc |
| 12966 hsa-mir-19b-1 | CENPJ     | 0.388747552 mirna_pc |
| 12967 hsa-mir-19b-1 | HNRNPU    | 0.39833706 mirna_pc  |
| 12968 hsa-mir-19b-1 | NASP      | 0.304431965 mirna_pc |
| 12969 hsa-mir-19b-1 | POLR1B    | 0.379604119 mirna_pc |
| 12970 hsa-mir-19b-1 | PTMA      | 0.317107444 mirna_pc |
| 12971 hsa-mir-19b-1 | SCARB1    | 0.30077597 mirna_pc  |
| 12972 hsa-mir-19b-1 | CLCN2     | 0.336460889 mirna_pc |
| 12973 hsa-mir-19b-1 | SUV39H2   | 0.3708281 mirna_pc   |
| 12974 hsa-mir-19b-1 | R3HDM1    | 0.333264458 mirna_pc |
| 12975 hsa-mir-19b-1 | FANCL     | 0.32911482 mirna_pc  |
| 12976 hsa-mir-19b-1 | RQCD1     | 0.330738018 mirna_pc |
| 12977 hsa-mir-19b-1 | HNRNPD    | 0.318807372 mirna_pc |
| 12978 hsa-mir-19b-1 | MTHFD2    | 0.353975635 mirna_pc |
| 12979 hsa-mir-19b-1 | GTF2F2    | 0.333285765 mirna_pc |
| 12980 hsa-mir-19b-1 | POP1      | 0.376144478 mirna_pc |
| 12981 hsa-mir-19b-1 | PN01      | 0.309221256 mirna_pc |
| 12982 hsa-mir-19b-1 | CASP2     | 0.303532423 mirna_pc |
| 12983 hsa-mir-19b-1 | ELAVL1    | 0.329508487 mirna_pc |
| 12984 hsa-mir-19b-1 | KIAA0406  | 0.34373882 mirna_pc  |
| 12985 hsa-mir-19b-1 | HSP90B1   | 0.309275071 mirna_pc |
| 12986 hsa-mir-19b-1 | NUDT15    | 0.399279521 mirna_pc |
| 12987 hsa-mir-19b-1 | FASTKD1   | 0.390175913 mirna_pc |
| 12988 hsa-mir-19b-1 | E2F4      | 0.314259877 mirna_pc |
| 12989 hsa-mir-19b-1 | SLMO2     | 0.382246799 mirna_pc |
| 12990 hsa-mir-19b-1 | TWISTNB   | 0.311980598 mirna_pc |
| 12991 hsa-mir-19b-1 | DHFR      | 0.308749779 mirna_pc |
| 12992 hsa-mir-19b-1 | NAA25     | 0.419691954 mirna_pc |
| 12993 hsa-mir-19b-1 | ILF3      | 0.416386477 mirna_pc |
| 12994 hsa-mir-19b-1 | TBC1D4    | 0.31559534 mirna_pc  |
| 12995 hsa-mir-19b-1 | TRIB3     | 0.356927908 mirna_pc |
| 12996 hsa-mir-19b-1 | PASK      | 0.349166013 mirna_pc |
| 12997 hsa-mir-19b-1 | OLA1      | 0.307642748 mirna_pc |
| 12998 hsa-mir-19b-1 | RPGRIP1L  | 0.32786125 mirna_pc  |
| 12999 hsa-mir-19b-1 | ATP11A    | 0.306222088 mirna_pc |
| 13000 hsa-mir-19b-1 | TGS1      | 0.340051854 mirna_pc |
| 13001 hsa-mir-19b-1 | HEATR2    | 0.401486387 mirna_pc |
| 13002 hsa-mir-19b-1 | CYB5B     | 0.345674328 mirna_pc |
| 13003 hsa-mir-19b-1 | TRAF4     | 0.308192277 mirna_pc |
| 13004 hsa-mir-19b-1 | GAR1      | 0.319370921 mirna_pc |
| 13005 hsa-mir-19b-1 | CEP152    | 0.331150779 mirna_pc |
| 13006 hsa-mir-19b-1 | ZC3HAV1L  | 0.301235181 mirna_pc |
| 13007 hsa-mir-19b-1 | RPN2      | 0.301348863 mirna_pc |
| 13008 hsa-mir-19b-1 | TNFRSF10B | 0.361562215 mirna_pc |
| 13009 hsa-mir-19b-1 | RNF219    | 0.546231693 mirna_pc |
| 13010 hsa-mir-19b-1 | ITGB3BP   | 0.30389126 mirna_pc  |
| 13011 hsa-mir-19b-1 | SLC25A32  | 0.402981268 mirna_pc |
| 13012 hsa-mir-19b-1 | CEP78     | 0.322130704 mirna_pc |
| 13013 hsa-mir-19b-1 | SFPQ      | 0.324260839 mirna_pc |

|                     |           |                      |
|---------------------|-----------|----------------------|
| 13014 hsa-mir-19b-1 | RCOR2     | 0.364156973 mirna_pc |
| 13015 hsa-mir-19b-1 | POLA1     | 0.336782553 mirna_pc |
| 13016 hsa-mir-19b-1 | HDAC2     | 0.362622526 mirna_pc |
| 13017 hsa-mir-19b-1 | C10orf119 | 0.307878601 mirna_pc |
| 13018 hsa-mir-19b-1 | C10orf2   | 0.401854113 mirna_pc |
| 13019 hsa-mir-19b-1 | CSTF1     | 0.304108684 mirna_pc |
| 13020 hsa-mir-19b-1 | XRN2      | 0.320108518 mirna_pc |
| 13021 hsa-mir-19b-1 | KPNB1     | 0.421598261 mirna_pc |
| 13022 hsa-mir-19b-1 | SMC3      | 0.338264769 mirna_pc |
| 13023 hsa-mir-19b-1 | FLVCR1    | 0.336874907 mirna_pc |
| 13024 hsa-mir-19b-1 | HNRNPA1   | 0.331470866 mirna_pc |
| 13025 hsa-mir-19b-1 | AGMAT     | 0.337416647 mirna_pc |
| 13026 hsa-mir-19b-1 | MEX3A     | 0.357895674 mirna_pc |
| 13027 hsa-mir-19b-1 | TMC7      | 0.368066988 mirna_pc |
| 13028 hsa-mir-19b-1 | NANP      | 0.335306304 mirna_pc |
| 13029 hsa-mir-19b-1 | SUZ12     | 0.362530374 mirna_pc |
| 13030 hsa-mir-19b-1 | HNRNPA1L2 | 0.339083142 mirna_pc |
| 13031 hsa-mir-19b-1 | HMGB1     | 0.418151589 mirna_pc |
| 13032 hsa-mir-19b-1 | ZBTB12    | 0.300336103 mirna_pc |
| 13033 hsa-mir-19b-1 | DIAPH3    | 0.33696105 mirna_pc  |
| 13034 hsa-mir-19b-1 | TGIF2     | 0.401493276 mirna_pc |
| 13035 hsa-mir-19b-1 | ZC3H18    | 0.363934204 mirna_pc |
| 13036 hsa-mir-19b-1 | FARSB     | 0.390381467 mirna_pc |
| 13037 hsa-mir-19b-1 | PIK3AP1   | 0.301803117 mirna_pc |
| 13038 hsa-mir-19b-1 | SNX5      | 0.326138299 mirna_pc |
| 13039 hsa-mir-19b-1 | NOL10     | 0.34635156 mirna_pc  |
| 13040 hsa-mir-19b-1 | ANAPC1    | 0.333006121 mirna_pc |
| 13041 hsa-mir-19b-1 | POLE      | 0.370367715 mirna_pc |
| 13042 hsa-mir-19b-1 | SOX9      | 0.509577077 mirna_pc |
| 13043 hsa-mir-19b-1 | TIMM50    | 0.307978926 mirna_pc |
| 13044 hsa-mir-19b-1 | C13orf27  | 0.351732979 mirna_pc |
| 13045 hsa-mir-19b-1 | RBM14     | 0.307115017 mirna_pc |
| 13046 hsa-mir-19b-1 | RBMX      | 0.417731142 mirna_pc |
| 13047 hsa-mir-19b-1 | NOC3L     | 0.300214718 mirna_pc |
| 13048 hsa-mir-19b-1 | GPR180    | 0.414870219 mirna_pc |
| 13049 hsa-mir-19b-1 | DAP3      | 0.324848567 mirna_pc |
| 13050 hsa-mir-19b-1 | XRCC5     | 0.423025196 mirna_pc |
| 13051 hsa-mir-19b-1 | EXOSC8    | 0.333418967 mirna_pc |
| 13052 hsa-mir-19b-1 | CTCF      | 0.334302576 mirna_pc |
| 13053 hsa-mir-19b-1 | PDIA6     | 0.353973208 mirna_pc |
| 13054 hsa-mir-19b-1 | GRWD1     | 0.307899458 mirna_pc |
| 13055 hsa-mir-19b-1 | RPE       | 0.309165024 mirna_pc |
| 13056 hsa-mir-19b-1 | LBR       | 0.335959096 mirna_pc |
| 13057 hsa-mir-19b-1 | ORC2L     | 0.337328291 mirna_pc |
| 13058 hsa-mir-19b-1 | ZRANB3    | 0.302403537 mirna_pc |
| 13059 hsa-mir-19b-1 | RIF1      | 0.340040888 mirna_pc |
| 13060 hsa-mir-19b-1 | NUDT21    | 0.352177726 mirna_pc |
| 13061 hsa-mir-19b-1 | EFCAB4B   | 0.337874177 mirna_pc |
| 13062 hsa-mir-19b-1 | FAM136A   | 0.358141245 mirna_pc |
| 13063 hsa-mir-19b-1 | NRAS      | 0.479286436 mirna_pc |
| 13064 hsa-mir-19b-1 | TTLL4     | 0.30468462 mirna_pc  |
| 13065 hsa-mir-19b-1 | FBX041    | 0.368949732 mirna_pc |
| 13066 hsa-mir-19b-1 | RBCK1     | 0.333789224 mirna_pc |
| 13067 hsa-mir-19b-1 | EML4      | 0.301121312 mirna_pc |

|                     |          |                      |
|---------------------|----------|----------------------|
| 13068 hsa-mir-19b-1 | BZW2     | 0.35353457 mirna_pc  |
| 13069 hsa-mir-19b-1 | LRPPRC   | 0.369031078 mirna_pc |
| 13070 hsa-mir-19b-1 | CSNK2A1  | 0.358814557 mirna_pc |
| 13071 hsa-mir-19b-1 | RPIA     | 0.358587008 mirna_pc |
| 13072 hsa-mir-19b-1 | MOCS3    | 0.311046095 mirna_pc |
| 13073 hsa-mir-19b-1 | URB2     | 0.401000048 mirna_pc |
| 13074 hsa-mir-19b-1 | SFXN4    | 0.38028194 mirna_pc  |
| 13075 hsa-mir-19b-1 | RBM28    | 0.403679316 mirna_pc |
| 13076 hsa-mir-19b-1 | MRE11A   | 0.316085551 mirna_pc |
| 13077 hsa-mir-19b-1 | PABPC3   | 0.340854397 mirna_pc |
| 13078 hsa-mir-19b-1 | ILKAP    | 0.373305212 mirna_pc |
| 13079 hsa-mir-19b-1 | PLB1     | 0.330276753 mirna_pc |
| 13080 hsa-mir-19b-1 | FOXK1    | 0.305717415 mirna_pc |
| 13081 hsa-mir-19b-1 | C13orf23 | 0.406520062 mirna_pc |
| 13082 hsa-mir-19b-1 | SPATA2   | 0.339508855 mirna_pc |
| 13083 hsa-mir-19b-1 | RBM12    | 0.423366992 mirna_pc |
| 13084 hsa-mir-19b-1 | PDF      | 0.320014942 mirna_pc |
| 13085 hsa-mir-19b-1 | TOP 1.00 | 0.33399302 mirna_pc  |
| 13086 hsa-mir-19b-1 | TCERG1   | 0.356332651 mirna_pc |
| 13087 hsa-mir-19b-1 | PSPC1    | 0.42228509 mirna_pc  |
| 13088 hsa-mir-19b-1 | TOP1P1   | 0.379415374 mirna_pc |
| 13089 hsa-mir-19b-1 | MAPKAPK5 | 0.37623201 mirna_pc  |
| 13090 hsa-mir-19b-1 | E2F6     | 0.351089315 mirna_pc |
| 13091 hsa-mir-19b-1 | SLC25A15 | 0.353178954 mirna_pc |
| 13092 hsa-mir-19b-1 | SFRS13A  | 0.356637503 mirna_pc |
| 13093 hsa-mir-19b-1 | SCLY     | 0.352433213 mirna_pc |
| 13094 hsa-mir-19b-1 | FASTKD2  | 0.323537322 mirna_pc |
| 13095 hsa-mir-19b-1 | SLC19A1  | 0.313677673 mirna_pc |
| 13096 hsa-mir-19b-1 | TGDS     | 0.439108137 mirna_pc |
| 13097 hsa-mir-19b-1 | TFAM     | 0.355511787 mirna_pc |
| 13098 hsa-mir-19b-1 | ZDHHC7   | 0.309322199 mirna_pc |
| 13099 hsa-mir-19b-1 | ORC4L    | 0.379636559 mirna_pc |
| 13100 hsa-mir-19b-1 | ZC3H15   | 0.319193155 mirna_pc |
| 13101 hsa-mir-19b-1 | KIAA1704 | 0.39298024 mirna_pc  |
| 13102 hsa-mir-19b-1 | RPRD1B   | 0.326009341 mirna_pc |
| 13103 hsa-mir-19b-1 | MTIF2    | 0.38921761 mirna_pc  |
| 13104 hsa-mir-19b-1 | HNRNPA3  | 0.31424431 mirna_pc  |
| 13105 hsa-mir-19b-1 | ZNF828   | 0.413005084 mirna_pc |
| 13106 hsa-mir-19b-1 | SMC1A    | 0.36693194 mirna_pc  |
| 13107 hsa-mir-19b-1 | NUPL1    | 0.548422175 mirna_pc |
| 13108 hsa-mir-19b-1 | CCDC45   | 0.304073569 mirna_pc |
| 13109 hsa-mir-19b-1 | ANKRD5   | 0.300556766 mirna_pc |
| 13110 hsa-mir-19b-1 | GNL3     | 0.302319524 mirna_pc |
| 13111 hsa-mir-19b-1 | DHODH    | 0.324140964 mirna_pc |
| 13112 hsa-mir-19b-1 | UPF3A    | 0.336070342 mirna_pc |
| 13113 hsa-mir-19b-1 | SLC7A5P2 | 0.301062684 mirna_pc |
| 13114 hsa-mir-19b-1 | SFRS7    | 0.366570496 mirna_pc |
| 13115 hsa-mir-19b-1 | C9orf100 | 0.303572774 mirna_pc |
| 13116 hsa-mir-19b-1 | BEND3    | 0.323585854 mirna_pc |
| 13117 hsa-mir-19b-1 | NFXL1    | 0.312677853 mirna_pc |
| 13118 hsa-mir-19b-1 | SF3B2    | 0.304713641 mirna_pc |
| 13119 hsa-mir-19b-1 | UQCC     | 0.316599501 mirna_pc |
| 13120 hsa-mir-19b-1 | ANKS6    | 0.308864739 mirna_pc |
| 13121 hsa-mir-19b-1 | HNRNPH1  | 0.301835345 mirna_pc |

|                     |          |                      |
|---------------------|----------|----------------------|
| 13122 hsa-mir-19b-1 | ATP7B    | 0.317812903 mirna_pc |
| 13123 hsa-mir-19b-1 | EPRS     | 0.305273269 mirna_pc |
| 13124 hsa-mir-19b-1 | SLC35F2  | 0.325619747 mirna_pc |
| 13125 hsa-mir-19b-1 | CDC16    | 0.337050511 mirna_pc |
| 13126 hsa-mir-19b-1 | MRPL44   | 0.303171484 mirna_pc |
| 13127 hsa-mir-19b-1 | PTCD3    | 0.347345604 mirna_pc |
| 13128 hsa-mir-19b-1 | RNF6     | 0.334711954 mirna_pc |
| 13129 hsa-mir-19b-1 | DHX15    | 0.30928217 mirna_pc  |
| 13130 hsa-mir-19b-1 | IWS1     | 0.343496246 mirna_pc |
| 13131 hsa-mir-19b-1 | MAP2K6   | 0.323597082 mirna_pc |
| 13132 hsa-mir-19b-1 | CASP6    | 0.302392132 mirna_pc |
| 13133 hsa-mir-19b-1 | RBM26    | 0.332996532 mirna_pc |
| 13134 hsa-mir-19b-1 | ZNF92    | 0.32209414 mirna_pc  |
| 13135 hsa-mir-19b-1 | TMTC4    | 0.343473707 mirna_pc |
| 13136 hsa-mir-19b-1 | RMND1    | 0.351837261 mirna_pc |
| 13137 hsa-mir-19b-1 | ADNP     | 0.335795705 mirna_pc |
| 13138 hsa-mir-19b-1 | AZIN1    | 0.419513591 mirna_pc |
| 13139 hsa-mir-19b-1 | RSL1D1   | 0.309518124 mirna_pc |
| 13140 hsa-mir-19b-1 | CEBPZ    | 0.338424904 mirna_pc |
| 13141 hsa-mir-19b-1 | FASTKD5  | 0.354956277 mirna_pc |
| 13142 hsa-mir-19b-1 | IPO5     | 0.546150849 mirna_pc |
| 13143 hsa-mir-19b-1 | ALG11    | 0.336595705 mirna_pc |
| 13144 hsa-mir-19b-1 | MCCC2    | 0.325964057 mirna_pc |
| 13145 hsa-mir-19b-1 | NRF1     | 0.304911112 mirna_pc |
| 13146 hsa-mir-19b-1 | IDI2     | 0.301271845 mirna_pc |
| 13147 hsa-mir-19b-1 | NUP43    | 0.347387179 mirna_pc |
| 13148 hsa-mir-19b-1 | ZNF124   | 0.408639109 mirna_pc |
| 13149 hsa-mir-19b-1 | RNASEH2B | 0.366048816 mirna_pc |
| 13150 hsa-mir-19b-1 | ZNF473   | 0.423029645 mirna_pc |
| 13151 hsa-mir-19b-1 | COPS7B   | 0.303542345 mirna_pc |
| 13152 hsa-mir-19b-1 | UGGT1    | 0.336713643 mirna_pc |
| 13153 hsa-mir-19b-1 | DCLRE1A  | 0.374323278 mirna_pc |
| 13154 hsa-mir-19b-1 | ZNF749   | 0.304858301 mirna_pc |
| 13155 hsa-mir-19b-1 | ANP32A   | 0.369089703 mirna_pc |
| 13156 hsa-mir-19b-1 | DIS3     | 0.366549806 mirna_pc |
| 13157 hsa-mir-19b-1 | E2F5     | 0.348791249 mirna_pc |
| 13158 hsa-mir-19b-1 | NUFIP1   | 0.455332809 mirna_pc |
| 13159 hsa-mir-19b-1 | ZNF195   | 0.348496705 mirna_pc |
| 13160 hsa-mir-19b-1 | DCAF17   | 0.374752018 mirna_pc |
| 13161 hsa-mir-19b-1 | PRKAR1B  | 0.347933967 mirna_pc |
| 13162 hsa-mir-19b-1 | BCAS2    | 0.456184293 mirna_pc |
| 13163 hsa-mir-19b-1 | HEATR3   | 0.310129335 mirna_pc |
| 13164 hsa-mir-19b-1 | USP45    | 0.301588776 mirna_pc |
| 13165 hsa-mir-19b-1 | LRRCC1   | 0.305437242 mirna_pc |
| 13166 hsa-mir-19b-1 | PHOSPHO2 | 0.300598241 mirna_pc |
| 13167 hsa-mir-19b-1 | ASNSD1   | 0.309931655 mirna_pc |
| 13168 hsa-mir-19b-1 | PPP5C    | 0.31034875 mirna_pc  |
| 13169 hsa-mir-19b-1 | NEK3     | 0.309047746 mirna_pc |
| 13170 hsa-mir-19b-1 | SF1      | 0.309484876 mirna_pc |
| 13171 hsa-mir-19b-1 | RRP1B    | 0.331306863 mirna_pc |
| 13172 hsa-mir-19b-1 | VIL1     | 0.310765629 mirna_pc |
| 13173 hsa-mir-19b-1 | TMEM170A | 0.472029709 mirna_pc |
| 13174 hsa-mir-19b-1 | FAM48A   | 0.401133372 mirna_pc |
| 13175 hsa-mir-19b-1 | PMS1     | 0.378950411 mirna_pc |



|                     |              |                      |
|---------------------|--------------|----------------------|
| 13176 hsa-mir-19b-1 | CHCHD3       | 0.307104076 mirna_pc |
| 13177 hsa-mir-19b-1 | CCDC122      | 0.313331629 mirna_pc |
| 13178 hsa-mir-19b-1 | TRUB1        | 0.353731332 mirna_pc |
| 13179 hsa-mir-19b-1 | ZMYM2        | 0.359533107 mirna_pc |
| 13180 hsa-mir-19b-1 | UGT8         | 0.317837984 mirna_pc |
| 13181 hsa-mir-19b-1 | CCNJ         | 0.476609696 mirna_pc |
| 13182 hsa-mir-19b-1 | ABCC4        | 0.350374833 mirna_pc |
| 13183 hsa-mir-19b-1 | ESF1         | 0.304203691 mirna_pc |
| 13184 hsa-mir-19b-1 | SMARCC1      | 0.367138842 mirna_pc |
| 13185 hsa-mir-19b-1 | CTPS2        | 0.385581647 mirna_pc |
| 13186 hsa-mir-19b-1 | XPO4         | 0.541693014 mirna_pc |
| 13187 hsa-mir-19b-1 | TSEN2        | 0.310158648 mirna_pc |
| 13188 hsa-mir-19b-1 | MDN1         | 0.309142462 mirna_pc |
| 13189 hsa-mir-19b-1 | ZBTB39       | 0.309400721 mirna_pc |
| 13190 hsa-mir-19b-1 | IFT88        | 0.411311376 mirna_pc |
| 13191 hsa-mir-19b-1 | TP53RK       | 0.354145217 mirna_pc |
| 13192 hsa-mir-19b-1 | QRSL1        | 0.400301445 mirna_pc |
| 13193 hsa-mir-19b-1 | FANCF        | 0.380863697 mirna_pc |
| 13194 hsa-mir-19b-1 | MARS2        | 0.385196709 mirna_pc |
| 13195 hsa-mir-19b-1 | ZBTB24       | 0.362404344 mirna_pc |
| 13196 hsa-mir-19b-1 | ZNF551       | 0.340132831 mirna_pc |
| 13197 hsa-mir-19b-1 | CIAO1        | 0.336760745 mirna_pc |
| 13198 hsa-mir-19b-1 | C2orf3       | 0.33903232 mirna_pc  |
| 13199 hsa-mir-19b-1 | FAM119A      | 0.333963518 mirna_pc |
| 13200 hsa-mir-19b-1 | RRP7B        | 0.306030438 mirna_pc |
| 13201 hsa-mir-19b-1 | VPS36        | 0.317754391 mirna_pc |
| 13202 hsa-mir-19b-1 | GOLT1A       | 0.335018068 mirna_pc |
| 13203 hsa-mir-19b-1 | CAPN10       | 0.315799791 mirna_pc |
| 13204 hsa-mir-19b-1 | GALNT5       | 0.310966203 mirna_pc |
| 13205 hsa-mir-19b-1 | STK35        | 0.3062779 mirna_pc   |
| 13206 hsa-mir-19b-1 | SCML2        | 0.31476852 mirna_pc  |
| 13207 hsa-mir-19b-1 | MRPL19       | 0.374835771 mirna_pc |
| 13208 hsa-mir-19b-1 | ABCB10       | 0.331281045 mirna_pc |
| 13209 hsa-mir-19b-1 | CLCN4        | 0.389585843 mirna_pc |
| 13210 hsa-mir-19b-1 | ZCCHC3       | 0.418790965 mirna_pc |
| 13211 hsa-mir-19b-1 | RRP15        | 0.395125553 mirna_pc |
| 13212 hsa-mir-19b-1 | IARS         | 0.30514013 mirna_pc  |
| 13213 hsa-mir-19b-1 | AADAT        | 0.346816687 mirna_pc |
| 13214 hsa-mir-19b-1 | DACH1        | 0.311048298 mirna_pc |
| 13215 hsa-mir-19b-1 | NOM1         | 0.335499839 mirna_pc |
| 13216 hsa-mir-19b-1 | GTF3A        | 0.342449253 mirna_pc |
| 13217 hsa-mir-19b-1 | ZNF48        | 0.346339149 mirna_pc |
| 13218 hsa-mir-19b-1 | LOC100129637 | 0.343531277 mirna_pc |
| 13219 hsa-mir-19b-1 | AIMP1        | 0.33175056 mirna_pc  |
| 13220 hsa-mir-19b-1 | TPP2         | 0.421946374 mirna_pc |
| 13221 hsa-mir-19b-1 | TXLNG        | 0.437081293 mirna_pc |
| 13222 hsa-mir-19b-1 | TRIM25       | 0.413858064 mirna_pc |
| 13223 hsa-mir-19b-1 | MIR17HG      | 0.583844301 mirna_pc |
| 13224 hsa-mir-19b-1 | AARS         | 0.35463616 mirna_pc  |
| 13225 hsa-mir-19b-1 | PRDX3        | 0.311544753 mirna_pc |
| 13226 hsa-mir-19b-1 | ZNF239       | 0.33927797 mirna_pc  |
| 13227 hsa-mir-19b-1 | KLHL23       | 0.430913127 mirna_pc |
| 13228 hsa-mir-19b-1 | ZNF202       | 0.30730944 mirna_pc  |
| 13229 hsa-mir-19b-1 | CANX         | 0.326243135 mirna_pc |

|                     |          |                      |
|---------------------|----------|----------------------|
| 13230 hsa-mir-19b-1 | CENPV    | 0.31133671 mirna_pc  |
| 13231 hsa-mir-19b-1 | SFRS6    | 0.327594453 mirna_pc |
| 13232 hsa-mir-19b-1 | SLC4A5   | 0.336902046 mirna_pc |
| 13233 hsa-mir-19b-1 | DNMT3A   | 0.340217416 mirna_pc |
| 13234 hsa-mir-19b-1 | MIPEP    | 0.378202179 mirna_pc |
| 13235 hsa-mir-19b-1 | ZNF670   | 0.308165795 mirna_pc |
| 13236 hsa-mir-19b-1 | ZNF343   | 0.301486212 mirna_pc |
| 13237 hsa-mir-19b-1 | ZNF711   | 0.325937589 mirna_pc |
| 13238 hsa-mir-19b-1 | POM121   | 0.347524521 mirna_pc |
| 13239 hsa-mir-324   | TPX2     | 0.358250098 mirna_pc |
| 13240 hsa-mir-324   | KIF4B    | 0.314174082 mirna_pc |
| 13241 hsa-mir-324   | KPNA2    | 0.30084 mirna_pc     |
| 13242 hsa-mir-324   | CENPF    | 0.341614682 mirna_pc |
| 13243 hsa-mir-324   | RCC2     | 0.406927274 mirna_pc |
| 13244 hsa-mir-324   | HOXC9    | 0.393371443 mirna_pc |
| 13245 hsa-mir-324   | KIF11    | 0.362716469 mirna_pc |
| 13246 hsa-mir-324   | RRM2     | 0.336329087 mirna_pc |
| 13247 hsa-mir-324   | CDK1     | 0.314421588 mirna_pc |
| 13248 hsa-mir-324   | CDC25C   | 0.345308575 mirna_pc |
| 13249 hsa-mir-324   | UBE2C    | 0.403218952 mirna_pc |
| 13250 hsa-mir-324   | NUSAP1   | 0.41110009 mirna_pc  |
| 13251 hsa-mir-324   | MCM4     | 0.447405372 mirna_pc |
| 13252 hsa-mir-324   | BUB1B    | 0.408321046 mirna_pc |
| 13253 hsa-mir-324   | KIF18B   | 0.318398346 mirna_pc |
| 13254 hsa-mir-324   | ASPM     | 0.300685146 mirna_pc |
| 13255 hsa-mir-324   | KIF2C    | 0.427379757 mirna_pc |
| 13256 hsa-mir-324   | FANCA    | 0.336142238 mirna_pc |
| 13257 hsa-mir-324   | NCAPG    | 0.482223698 mirna_pc |
| 13258 hsa-mir-324   | CDC20    | 0.326836507 mirna_pc |
| 13259 hsa-mir-324   | CLSPN    | 0.365220208 mirna_pc |
| 13260 hsa-mir-324   | CCNA2    | 0.491496401 mirna_pc |
| 13261 hsa-mir-324   | SPC25    | 0.314301599 mirna_pc |
| 13262 hsa-mir-324   | FANCI    | 0.35827464 mirna_pc  |
| 13263 hsa-mir-324   | NEK2     | 0.363907602 mirna_pc |
| 13264 hsa-mir-324   | MND1     | 0.451048794 mirna_pc |
| 13265 hsa-mir-324   | KIF22    | 0.347536488 mirna_pc |
| 13266 hsa-mir-324   | NCAPH    | 0.438163344 mirna_pc |
| 13267 hsa-mir-324   | RAD54L   | 0.409092676 mirna_pc |
| 13268 hsa-mir-324   | CENPA    | 0.413966785 mirna_pc |
| 13269 hsa-mir-324   | MAD2L1   | 0.504295989 mirna_pc |
| 13270 hsa-mir-324   | TIMELESS | 0.490614807 mirna_pc |
| 13271 hsa-mir-324   | LMNB1    | 0.451821466 mirna_pc |
| 13272 hsa-mir-324   | DLGAP5   | 0.31232143 mirna_pc  |
| 13273 hsa-mir-324   | CDCA8    | 0.321100826 mirna_pc |
| 13274 hsa-mir-324   | TROAP    | 0.485168018 mirna_pc |
| 13275 hsa-mir-324   | CDCA5    | 0.392880619 mirna_pc |
| 13276 hsa-mir-324   | XP01     | 0.347725856 mirna_pc |
| 13277 hsa-mir-324   | CDC45    | 0.367989146 mirna_pc |
| 13278 hsa-mir-324   | STMN1    | 0.458070395 mirna_pc |
| 13279 hsa-mir-324   | EXO1     | 0.311536486 mirna_pc |
| 13280 hsa-mir-324   | DKC1     | 0.383438654 mirna_pc |
| 13281 hsa-mir-324   | UBE2T    | 0.322016351 mirna_pc |
| 13282 hsa-mir-324   | CKS1B    | 0.418625394 mirna_pc |
| 13283 hsa-mir-324   | TUBB     | 0.399921085 mirna_pc |

|                   |          |                      |
|-------------------|----------|----------------------|
| 13284 hsa-mir-324 | MCM2     | 0.411348995 mirna_pc |
| 13285 hsa-mir-324 | KIF4A    | 0.332859297 mirna_pc |
| 13286 hsa-mir-324 | ORC1L    | 0.392169495 mirna_pc |
| 13287 hsa-mir-324 | SNRPB    | 0.324974287 mirna_pc |
| 13288 hsa-mir-324 | KNTC1    | 0.387520019 mirna_pc |
| 13289 hsa-mir-324 | UHRF1    | 0.335700091 mirna_pc |
| 13290 hsa-mir-324 | RACGAP1  | 0.313897594 mirna_pc |
| 13291 hsa-mir-324 | CCNB2    | 0.358411693 mirna_pc |
| 13292 hsa-mir-324 | NUF2     | 0.433794534 mirna_pc |
| 13293 hsa-mir-324 | PLK4     | 0.46539046 mirna_pc  |
| 13294 hsa-mir-324 | FANCB    | 0.300208267 mirna_pc |
| 13295 hsa-mir-324 | KIF18A   | 0.316664435 mirna_pc |
| 13296 hsa-mir-324 | DEPDC1   | 0.368677333 mirna_pc |
| 13297 hsa-mir-324 | HJURP    | 0.377728837 mirna_pc |
| 13298 hsa-mir-324 | SKA1     | 0.371878783 mirna_pc |
| 13299 hsa-mir-324 | BLM      | 0.32098806 mirna_pc  |
| 13300 hsa-mir-324 | ESPL1    | 0.30279245 mirna_pc  |
| 13301 hsa-mir-324 | DNMT1    | 0.319881136 mirna_pc |
| 13302 hsa-mir-324 | PAICS    | 0.480749331 mirna_pc |
| 13303 hsa-mir-324 | BIRC5    | 0.438869777 mirna_pc |
| 13304 hsa-mir-324 | RCC1     | 0.326511722 mirna_pc |
| 13305 hsa-mir-324 | LIG1     | 0.316828867 mirna_pc |
| 13306 hsa-mir-324 | OIP5     | 0.301046348 mirna_pc |
| 13307 hsa-mir-324 | DTL      | 0.43160607 mirna_pc  |
| 13308 hsa-mir-324 | EME1     | 0.365385681 mirna_pc |
| 13309 hsa-mir-324 | RECQL4   | 0.463007789 mirna_pc |
| 13310 hsa-mir-324 | AURKB    | 0.549302393 mirna_pc |
| 13311 hsa-mir-324 | GSG2     | 0.395202669 mirna_pc |
| 13312 hsa-mir-324 | CDT1     | 0.303150211 mirna_pc |
| 13313 hsa-mir-324 | MCM10    | 0.391001561 mirna_pc |
| 13314 hsa-mir-324 | KIF20A   | 0.405543034 mirna_pc |
| 13315 hsa-mir-324 | CHEK2    | 0.460112118 mirna_pc |
| 13316 hsa-mir-324 | CENPE    | 0.357335068 mirna_pc |
| 13317 hsa-mir-324 | KIF15    | 0.308347836 mirna_pc |
| 13318 hsa-mir-324 | CDCA3    | 0.350633991 mirna_pc |
| 13319 hsa-mir-324 | C1orf112 | 0.404863054 mirna_pc |
| 13320 hsa-mir-324 | GINS1    | 0.425073101 mirna_pc |
| 13321 hsa-mir-324 | FEN1     | 0.324237773 mirna_pc |
| 13322 hsa-mir-324 | ORC6L    | 0.408983281 mirna_pc |
| 13323 hsa-mir-324 | ERH      | 0.376056107 mirna_pc |
| 13324 hsa-mir-324 | C16orf59 | 0.436039736 mirna_pc |
| 13325 hsa-mir-324 | C17orf53 | 0.319115069 mirna_pc |
| 13326 hsa-mir-324 | RAE1     | 0.380394051 mirna_pc |
| 13327 hsa-mir-324 | NEIL3    | 0.489889291 mirna_pc |
| 13328 hsa-mir-324 | ACTL6A   | 0.464662501 mirna_pc |
| 13329 hsa-mir-324 | POLD1    | 0.420859552 mirna_pc |
| 13330 hsa-mir-324 | ZNF229   | 0.311311907 mirna_pc |
| 13331 hsa-mir-324 | C12orf48 | 0.358556682 mirna_pc |
| 13332 hsa-mir-324 | HNRNPL   | 0.441641268 mirna_pc |
| 13333 hsa-mir-324 | SMC4     | 0.331365637 mirna_pc |
| 13334 hsa-mir-324 | TTK      | 0.379722174 mirna_pc |
| 13335 hsa-mir-324 | TUBA1B   | 0.40508067 mirna_pc  |
| 13336 hsa-mir-324 | RUVBL1   | 0.315802859 mirna_pc |
| 13337 hsa-mir-324 | HELLS    | 0.330024747 mirna_pc |

|       |             |           |             |          |
|-------|-------------|-----------|-------------|----------|
| 13338 | hsa-mir-324 | FAHD2B    | 0.32198001  | mirna_pc |
| 13339 | hsa-mir-324 | POLE2     | 0.336884384 | mirna_pc |
| 13340 | hsa-mir-324 | UBE2S     | 0.388570077 | mirna_pc |
| 13341 | hsa-mir-324 | NCAPD2    | 0.352995222 | mirna_pc |
| 13342 | hsa-mir-324 | C11orf82  | 0.35866305  | mirna_pc |
| 13343 | hsa-mir-324 | HNRNPC    | 0.466177404 | mirna_pc |
| 13344 | hsa-mir-324 | ILF2      | 0.411572876 | mirna_pc |
| 13345 | hsa-mir-324 | C6orf167  | 0.325613869 | mirna_pc |
| 13346 | hsa-mir-324 | CHEK1     | 0.368193035 | mirna_pc |
| 13347 | hsa-mir-324 | MCM5      | 0.336291634 | mirna_pc |
| 13348 | hsa-mir-324 | HNRNPA2B1 | 0.310786008 | mirna_pc |
| 13349 | hsa-mir-324 | RAN       | 0.33783311  | mirna_pc |
| 13350 | hsa-mir-324 | TYMS      | 0.397516554 | mirna_pc |
| 13351 | hsa-mir-324 | RFWD3     | 0.324970932 | mirna_pc |
| 13352 | hsa-mir-324 | MCM6      | 0.364621421 | mirna_pc |
| 13353 | hsa-mir-324 | RNASEH2A  | 0.33990425  | mirna_pc |
| 13354 | hsa-mir-324 | EPR1      | 0.388250522 | mirna_pc |
| 13355 | hsa-mir-324 | BRIP1     | 0.329919683 | mirna_pc |
| 13356 | hsa-mir-324 | SFRS2     | 0.33354931  | mirna_pc |
| 13357 | hsa-mir-324 | DCAF13    | 0.334841887 | mirna_pc |
| 13358 | hsa-mir-324 | UCK2      | 0.486046437 | mirna_pc |
| 13359 | hsa-mir-324 | WDHD1     | 0.355595382 | mirna_pc |
| 13360 | hsa-mir-324 | THOC4     | 0.305351266 | mirna_pc |
| 13361 | hsa-mir-324 | NFKBIL2   | 0.455913612 | mirna_pc |
| 13362 | hsa-mir-324 | C15orf42  | 0.365076863 | mirna_pc |
| 13363 | hsa-mir-324 | PTGES3    | 0.321489766 | mirna_pc |
| 13364 | hsa-mir-324 | PRIM2     | 0.416367764 | mirna_pc |
| 13365 | hsa-mir-324 | FAM60A    | 0.308210231 | mirna_pc |
| 13366 | hsa-mir-324 | HMGB3     | 0.395825815 | mirna_pc |
| 13367 | hsa-mir-324 | FAM64A    | 0.507607556 | mirna_pc |
| 13368 | hsa-mir-324 | RANBP1    | 0.372076431 | mirna_pc |
| 13369 | hsa-mir-324 | MTBP      | 0.340490479 | mirna_pc |
| 13370 | hsa-mir-324 | E2F1      | 0.305959879 | mirna_pc |
| 13371 | hsa-mir-324 | EIF4A3    | 0.380760375 | mirna_pc |
| 13372 | hsa-mir-324 | SNRPA     | 0.427244599 | mirna_pc |
| 13373 | hsa-mir-324 | FUS       | 0.45043752  | mirna_pc |
| 13374 | hsa-mir-324 | DNAJC9    | 0.348986824 | mirna_pc |
| 13375 | hsa-mir-324 | U2AF2     | 0.382120223 | mirna_pc |
| 13376 | hsa-mir-324 | CHAF1A    | 0.339162136 | mirna_pc |
| 13377 | hsa-mir-324 | GINS4     | 0.335222976 | mirna_pc |
| 13378 | hsa-mir-324 | ANP32E    | 0.408956681 | mirna_pc |
| 13379 | hsa-mir-324 | PSMD11    | 0.330503271 | mirna_pc |
| 13380 | hsa-mir-324 | CENPO     | 0.421404368 | mirna_pc |
| 13381 | hsa-mir-324 | C19orf48  | 0.373881263 | mirna_pc |
| 13382 | hsa-mir-324 | CENPL     | 0.322144693 | mirna_pc |
| 13383 | hsa-mir-324 | NUDT1     | 0.300914865 | mirna_pc |
| 13384 | hsa-mir-324 | HMGB2     | 0.459377944 | mirna_pc |
| 13385 | hsa-mir-324 | GINS2     | 0.403176646 | mirna_pc |
| 13386 | hsa-mir-324 | DNA2      | 0.304138898 | mirna_pc |
| 13387 | hsa-mir-324 | NOP56     | 0.309346494 | mirna_pc |
| 13388 | hsa-mir-324 | CDCA4     | 0.33016045  | mirna_pc |
| 13389 | hsa-mir-324 | CSE1L     | 0.396632655 | mirna_pc |
| 13390 | hsa-mir-324 | TMEM206   | 0.314374558 | mirna_pc |
| 13391 | hsa-mir-324 | E2F7      | 0.355028473 | mirna_pc |

|                   |           |                      |
|-------------------|-----------|----------------------|
| 13392 hsa-mir-324 | PRMT1     | 0.374598223 mirna_pc |
| 13393 hsa-mir-324 | MLF1IP    | 0.349318932 mirna_pc |
| 13394 hsa-mir-324 | C16orf75  | 0.330543366 mirna_pc |
| 13395 hsa-mir-324 | NOP2      | 0.337679261 mirna_pc |
| 13396 hsa-mir-324 | HIST1H2AE | 0.303427458 mirna_pc |
| 13397 hsa-mir-324 | CAD       | 0.449350398 mirna_pc |
| 13398 hsa-mir-324 | ZFP64     | 0.399203812 mirna_pc |
| 13399 hsa-mir-324 | CCDC99    | 0.323180196 mirna_pc |
| 13400 hsa-mir-324 | CDK2      | 0.466930938 mirna_pc |
| 13401 hsa-mir-324 | CDK4      | 0.44945246 mirna_pc  |
| 13402 hsa-mir-324 | PFDN2     | 0.35557995 mirna_pc  |
| 13403 hsa-mir-324 | CHTF18    | 0.328599076 mirna_pc |
| 13404 hsa-mir-324 | HNRNPR    | 0.488203047 mirna_pc |
| 13405 hsa-mir-324 | PRIM1     | 0.426310303 mirna_pc |
| 13406 hsa-mir-324 | KAT2A     | 0.332690298 mirna_pc |
| 13407 hsa-mir-324 | CENPH     | 0.356641337 mirna_pc |
| 13408 hsa-mir-324 | TCOF1     | 0.351523274 mirna_pc |
| 13409 hsa-mir-324 | CHAF1B    | 0.43582826 mirna_pc  |
| 13410 hsa-mir-324 | ACYP1     | 0.312336395 mirna_pc |
| 13411 hsa-mir-324 | MSH2      | 0.52899194 mirna_pc  |
| 13412 hsa-mir-324 | DBF4      | 0.357422991 mirna_pc |
| 13413 hsa-mir-324 | TOMM40    | 0.324281656 mirna_pc |
| 13414 hsa-mir-324 | SF3B3     | 0.428244427 mirna_pc |
| 13415 hsa-mir-324 | CDC7      | 0.468845447 mirna_pc |
| 13416 hsa-mir-324 | YDJC      | 0.361897892 mirna_pc |
| 13417 hsa-mir-324 | NOL11     | 0.37456987 mirna_pc  |
| 13418 hsa-mir-324 | SNRPC     | 0.311475316 mirna_pc |
| 13419 hsa-mir-324 | RFC4      | 0.490988591 mirna_pc |
| 13420 hsa-mir-324 | FBX05     | 0.40211425 mirna_pc  |
| 13421 hsa-mir-324 | DCLRE1B   | 0.300543542 mirna_pc |
| 13422 hsa-mir-324 | FIGNL1    | 0.356979672 mirna_pc |
| 13423 hsa-mir-324 | BRIX1     | 0.397792352 mirna_pc |
| 13424 hsa-mir-324 | E2F3      | 0.34964547 mirna_pc  |
| 13425 hsa-mir-324 | SF3B14    | 0.346349039 mirna_pc |
| 13426 hsa-mir-324 | RUVBL2    | 0.307292986 mirna_pc |
| 13427 hsa-mir-324 | CDC25A    | 0.361915304 mirna_pc |
| 13428 hsa-mir-324 | RAD54B    | 0.375073834 mirna_pc |
| 13429 hsa-mir-324 | OTX1      | 0.346563824 mirna_pc |
| 13430 hsa-mir-324 | PRKDC     | 0.353621354 mirna_pc |
| 13431 hsa-mir-324 | H2AFZ     | 0.451172256 mirna_pc |
| 13432 hsa-mir-324 | NRM       | 0.305038055 mirna_pc |
| 13433 hsa-mir-324 | MAGOH     | 0.314297881 mirna_pc |
| 13434 hsa-mir-324 | DDX12     | 0.390313269 mirna_pc |
| 13435 hsa-mir-324 | NUP37     | 0.320727521 mirna_pc |
| 13436 hsa-mir-324 | CPSF3     | 0.445210803 mirna_pc |
| 13437 hsa-mir-324 | BANF1     | 0.417730684 mirna_pc |
| 13438 hsa-mir-324 | SNRPE     | 0.395219626 mirna_pc |
| 13439 hsa-mir-324 | C21orf45  | 0.501442553 mirna_pc |
| 13440 hsa-mir-324 | PPM1G     | 0.329243827 mirna_pc |
| 13441 hsa-mir-324 | SNRPD2    | 0.33334836 mirna_pc  |
| 13442 hsa-mir-324 | NPM3      | 0.344994942 mirna_pc |
| 13443 hsa-mir-324 | TFAP4     | 0.419255157 mirna_pc |
| 13444 hsa-mir-324 | RNPS1     | 0.342185251 mirna_pc |
| 13445 hsa-mir-324 | DAZAP1    | 0.397481712 mirna_pc |

|                   |              |                      |
|-------------------|--------------|----------------------|
| 13446 hsa-mir-324 | CBX8         | 0.429622157 mirna_pc |
| 13447 hsa-mir-324 | TRMT6        | 0.325702342 mirna_pc |
| 13448 hsa-mir-324 | TMEM201      | 0.479970627 mirna_pc |
| 13449 hsa-mir-324 | NCL          | 0.34404036 mirna_pc  |
| 13450 hsa-mir-324 | PAFAH1B3     | 0.420823861 mirna_pc |
| 13451 hsa-mir-324 | CACYBP       | 0.341751119 mirna_pc |
| 13452 hsa-mir-324 | SASS6        | 0.302514003 mirna_pc |
| 13453 hsa-mir-324 | PSRC1        | 0.395343493 mirna_pc |
| 13454 hsa-mir-324 | DGUOK        | 0.36237172 mirna_pc  |
| 13455 hsa-mir-324 | MRPL47       | 0.392227483 mirna_pc |
| 13456 hsa-mir-324 | FBL          | 0.353004884 mirna_pc |
| 13457 hsa-mir-324 | DONSON       | 0.362526744 mirna_pc |
| 13458 hsa-mir-324 | STIP1        | 0.312870614 mirna_pc |
| 13459 hsa-mir-324 | HIST1H1E     | 0.323480225 mirna_pc |
| 13460 hsa-mir-324 | PTK7         | 0.306309516 mirna_pc |
| 13461 hsa-mir-324 | EXOSC5       | 0.370465648 mirna_pc |
| 13462 hsa-mir-324 | HNRNPM       | 0.369542118 mirna_pc |
| 13463 hsa-mir-324 | TMPO         | 0.323287533 mirna_pc |
| 13464 hsa-mir-324 | CCT6A        | 0.329942982 mirna_pc |
| 13465 hsa-mir-324 | CDC123       | 0.304885351 mirna_pc |
| 13466 hsa-mir-324 | SET          | 0.354029358 mirna_pc |
| 13467 hsa-mir-324 | POLR2H       | 0.353735337 mirna_pc |
| 13468 hsa-mir-324 | C20orf72     | 0.304779119 mirna_pc |
| 13469 hsa-mir-324 | C3orf26      | 0.3543403 mirna_pc   |
| 13470 hsa-mir-324 | MRT04        | 0.347425979 mirna_pc |
| 13471 hsa-mir-324 | GPR19        | 0.330482597 mirna_pc |
| 13472 hsa-mir-324 | NUP93        | 0.318659733 mirna_pc |
| 13473 hsa-mir-324 | LSG1         | 0.391822142 mirna_pc |
| 13474 hsa-mir-324 | PPIH         | 0.334014543 mirna_pc |
| 13475 hsa-mir-324 | THOC6        | 0.332866494 mirna_pc |
| 13476 hsa-mir-324 | GMPS         | 0.368266478 mirna_pc |
| 13477 hsa-mir-324 | LAPTM4B      | 0.301547971 mirna_pc |
| 13478 hsa-mir-324 | PPAT         | 0.44400955 mirna_pc  |
| 13479 hsa-mir-324 | DHX9         | 0.378078497 mirna_pc |
| 13480 hsa-mir-324 | CCDC138      | 0.415050286 mirna_pc |
| 13481 hsa-mir-324 | LOC100128191 | 0.48100997 mirna_pc  |
| 13482 hsa-mir-324 | MRPL3        | 0.338363191 mirna_pc |
| 13483 hsa-mir-324 | EIF5A        | 0.408849397 mirna_pc |
| 13484 hsa-mir-324 | HMG2         | 0.305066402 mirna_pc |
| 13485 hsa-mir-324 | MORC2        | 0.305549921 mirna_pc |
| 13486 hsa-mir-324 | SMYD5        | 0.382543859 mirna_pc |
| 13487 hsa-mir-324 | TSSC1        | 0.333581431 mirna_pc |
| 13488 hsa-mir-324 | C20orf3      | 0.386603349 mirna_pc |
| 13489 hsa-mir-324 | PFN1         | 0.312156788 mirna_pc |
| 13490 hsa-mir-324 | POLA2        | 0.361972603 mirna_pc |
| 13491 hsa-mir-324 | CCDC77       | 0.324152104 mirna_pc |
| 13492 hsa-mir-324 | PHF6         | 0.307461822 mirna_pc |
| 13493 hsa-mir-324 | SUM02        | 0.370467263 mirna_pc |
| 13494 hsa-mir-324 | SFRS1        | 0.331354184 mirna_pc |
| 13495 hsa-mir-324 | CDH24        | 0.412732128 mirna_pc |
| 13496 hsa-mir-324 | TEX10        | 0.349782957 mirna_pc |
| 13497 hsa-mir-324 | WDR43        | 0.376826532 mirna_pc |
| 13498 hsa-mir-324 | SNRPA1       | 0.322086364 mirna_pc |
| 13499 hsa-mir-324 | SKP2         | 0.495859019 mirna_pc |

|                   |          |                      |
|-------------------|----------|----------------------|
| 13500 hsa-mir-324 | TIPIN    | 0.414184545 mirna_pc |
| 13501 hsa-mir-324 | SMARCD1  | 0.469287998 mirna_pc |
| 13502 hsa-mir-324 | ATXN2L   | 0.304224258 mirna_pc |
| 13503 hsa-mir-324 | HSPBP1   | 0.314237218 mirna_pc |
| 13504 hsa-mir-324 | C4orf46  | 0.41019975 mirna_pc  |
| 13505 hsa-mir-324 | ECE2     | 0.385942233 mirna_pc |
| 13506 hsa-mir-324 | GPN1     | 0.3903683 mirna_pc   |
| 13507 hsa-mir-324 | RFC5     | 0.4197726 mirna_pc   |
| 13508 hsa-mir-324 | MAZ      | 0.322176213 mirna_pc |
| 13509 hsa-mir-324 | SSRP1    | 0.379906329 mirna_pc |
| 13510 hsa-mir-324 | TIGD1    | 0.314982913 mirna_pc |
| 13511 hsa-mir-324 | SLBP     | 0.30418825 mirna_pc  |
| 13512 hsa-mir-324 | PA2G4    | 0.369662421 mirna_pc |
| 13513 hsa-mir-324 | SNRPD3   | 0.413445671 mirna_pc |
| 13514 hsa-mir-324 | KHDRBS1  | 0.453874816 mirna_pc |
| 13515 hsa-mir-324 | C20orf27 | 0.395654458 mirna_pc |
| 13516 hsa-mir-324 | YEATS2   | 0.339667299 mirna_pc |
| 13517 hsa-mir-324 | SPAST    | 0.346764784 mirna_pc |
| 13518 hsa-mir-324 | LOC92659 | 0.329707062 mirna_pc |
| 13519 hsa-mir-324 | CCDC21   | 0.38203783 mirna_pc  |
| 13520 hsa-mir-324 | MTL 5.00 | 0.329732876 mirna_pc |
| 13521 hsa-mir-324 | PHF5A    | 0.311878037 mirna_pc |
| 13522 hsa-mir-324 | PARP1    | 0.370848135 mirna_pc |
| 13523 hsa-mir-324 | CCT7     | 0.357491283 mirna_pc |
| 13524 hsa-mir-324 | MTERFD1  | 0.359934754 mirna_pc |
| 13525 hsa-mir-324 | C4orf21  | 0.310245544 mirna_pc |
| 13526 hsa-mir-324 | TMEM194A | 0.382550526 mirna_pc |
| 13527 hsa-mir-324 | TDP1     | 0.332069048 mirna_pc |
| 13528 hsa-mir-324 | MED30    | 0.369460733 mirna_pc |
| 13529 hsa-mir-324 | METTL1   | 0.305134442 mirna_pc |
| 13530 hsa-mir-324 | TMEM69   | 0.344981855 mirna_pc |
| 13531 hsa-mir-324 | GINS3    | 0.323808544 mirna_pc |
| 13532 hsa-mir-324 | NEDD1    | 0.346670214 mirna_pc |
| 13533 hsa-mir-324 | JUB      | 0.307511457 mirna_pc |
| 13534 hsa-mir-324 | GNL2     | 0.3337458 mirna_pc   |
| 13535 hsa-mir-324 | WRAP53   | 0.512367422 mirna_pc |
| 13536 hsa-mir-324 | RAD21    | 0.329419917 mirna_pc |
| 13537 hsa-mir-324 | HNRNPU   | 0.309191538 mirna_pc |
| 13538 hsa-mir-324 | NASP     | 0.408449032 mirna_pc |
| 13539 hsa-mir-324 | RPP40    | 0.379166061 mirna_pc |
| 13540 hsa-mir-324 | CCDC86   | 0.342205286 mirna_pc |
| 13541 hsa-mir-324 | ZNF280C  | 0.33370712 mirna_pc  |
| 13542 hsa-mir-324 | PTMA     | 0.33971561 mirna_pc  |
| 13543 hsa-mir-324 | USP39    | 0.326336312 mirna_pc |
| 13544 hsa-mir-324 | WDR76    | 0.39467876 mirna_pc  |
| 13545 hsa-mir-324 | EXOSC2   | 0.355975459 mirna_pc |
| 13546 hsa-mir-324 | C11orf84 | 0.454115381 mirna_pc |
| 13547 hsa-mir-324 | TOP1MT   | 0.374590799 mirna_pc |
| 13548 hsa-mir-324 | ARHGAP39 | 0.301982998 mirna_pc |
| 13549 hsa-mir-324 | TBCE     | 0.425854274 mirna_pc |
| 13550 hsa-mir-324 | LRRC8D   | 0.370983117 mirna_pc |
| 13551 hsa-mir-324 | NCBP2    | 0.396749551 mirna_pc |
| 13552 hsa-mir-324 | SUV39H2  | 0.373250271 mirna_pc |
| 13553 hsa-mir-324 | ZC3H8    | 0.327451674 mirna_pc |

|                   |          |                      |
|-------------------|----------|----------------------|
| 13554 hsa-mir-324 | FANCL    | 0.300520588 mirna_pc |
| 13555 hsa-mir-324 | HNRNPD   | 0.492918313 mirna_pc |
| 13556 hsa-mir-324 | DPY30    | 0.397355648 mirna_pc |
| 13557 hsa-mir-324 | MTHFD2   | 0.353031215 mirna_pc |
| 13558 hsa-mir-324 | EIF5AL1  | 0.388312158 mirna_pc |
| 13559 hsa-mir-324 | SFRS3    | 0.303115426 mirna_pc |
| 13560 hsa-mir-324 | MEN1     | 0.40502915 mirna_pc  |
| 13561 hsa-mir-324 | C17orf49 | 0.380329874 mirna_pc |
| 13562 hsa-mir-324 | H1FX     | 0.326855782 mirna_pc |
| 13563 hsa-mir-324 | PN01     | 0.313759011 mirna_pc |
| 13564 hsa-mir-324 | CCT4     | 0.41295932 mirna_pc  |
| 13565 hsa-mir-324 | RAD9A    | 0.311210765 mirna_pc |
| 13566 hsa-mir-324 | ELAVL1   | 0.40160835 mirna_pc  |
| 13567 hsa-mir-324 | ABCE1    | 0.319598577 mirna_pc |
| 13568 hsa-mir-324 | DUSP9    | 0.445599003 mirna_pc |
| 13569 hsa-mir-324 | MTHFD1   | 0.30420546 mirna_pc  |
| 13570 hsa-mir-324 | PRMT5    | 0.349413104 mirna_pc |
| 13571 hsa-mir-324 | MIF      | 0.303334983 mirna_pc |
| 13572 hsa-mir-324 | EIF4A1   | 0.44833676 mirna_pc  |
| 13573 hsa-mir-324 | NCAPD3   | 0.381177454 mirna_pc |
| 13574 hsa-mir-324 | NAE1     | 0.36611437 mirna_pc  |
| 13575 hsa-mir-324 | USP22    | 0.319894646 mirna_pc |
| 13576 hsa-mir-324 | PSMC3IP  | 0.371392351 mirna_pc |
| 13577 hsa-mir-324 | TBC1D7   | 0.366811863 mirna_pc |
| 13578 hsa-mir-324 | PAK1IP1  | 0.497038503 mirna_pc |
| 13579 hsa-mir-324 | RPAP3    | 0.355930488 mirna_pc |
| 13580 hsa-mir-324 | SUPT16H  | 0.373967724 mirna_pc |
| 13581 hsa-mir-324 | TRMT112  | 0.36083915 mirna_pc  |
| 13582 hsa-mir-324 | KPTN     | 0.311782848 mirna_pc |
| 13583 hsa-mir-324 | PSMD2    | 0.369066932 mirna_pc |
| 13584 hsa-mir-324 | PGAM5    | 0.306652456 mirna_pc |
| 13585 hsa-mir-324 | PMAIP1   | 0.307825112 mirna_pc |
| 13586 hsa-mir-324 | YWHAE    | 0.564236593 mirna_pc |
| 13587 hsa-mir-324 | KDM1A    | 0.349343511 mirna_pc |
| 13588 hsa-mir-324 | PDCL3    | 0.302543984 mirna_pc |
| 13589 hsa-mir-324 | ILF3     | 0.361505382 mirna_pc |
| 13590 hsa-mir-324 | NT5DC2   | 0.322534441 mirna_pc |
| 13591 hsa-mir-324 | EHMT2    | 0.364125313 mirna_pc |
| 13592 hsa-mir-324 | NUP155   | 0.303004992 mirna_pc |
| 13593 hsa-mir-324 | UBAP2L   | 0.425596596 mirna_pc |
| 13594 hsa-mir-324 | PUF60    | 0.364085519 mirna_pc |
| 13595 hsa-mir-324 | DEK      | 0.404956163 mirna_pc |
| 13596 hsa-mir-324 | SFRS9    | 0.328604528 mirna_pc |
| 13597 hsa-mir-324 | IPO4     | 0.322231774 mirna_pc |
| 13598 hsa-mir-324 | SIX1     | 0.369190318 mirna_pc |
| 13599 hsa-mir-324 | SAAL1    | 0.308274305 mirna_pc |
| 13600 hsa-mir-324 | ADORA2B  | 0.328128697 mirna_pc |
| 13601 hsa-mir-324 | GTF2H4   | 0.320306518 mirna_pc |
| 13602 hsa-mir-324 | TGS1     | 0.30981222 mirna_pc  |
| 13603 hsa-mir-324 | KHSRP    | 0.335194253 mirna_pc |
| 13604 hsa-mir-324 | LSM 6.00 | 0.375532507 mirna_pc |
| 13605 hsa-mir-324 | PRAME    | 0.55501345 mirna_pc  |
| 13606 hsa-mir-324 | MRPS17   | 0.351202606 mirna_pc |
| 13607 hsa-mir-324 | CBX2     | 0.364149052 mirna_pc |



|                   |          |                      |
|-------------------|----------|----------------------|
| 13608 hsa-mir-324 | AZI1     | 0.379923509 mirna_pc |
| 13609 hsa-mir-324 | TNFRSF18 | 0.365810481 mirna_pc |
| 13610 hsa-mir-324 | FUBP1    | 0.343797884 mirna_pc |
| 13611 hsa-mir-324 | WDR74    | 0.309434983 mirna_pc |
| 13612 hsa-mir-324 | IPO9     | 0.375836775 mirna_pc |
| 13613 hsa-mir-324 | NUP188   | 0.300079176 mirna_pc |
| 13614 hsa-mir-324 | SART3    | 0.32842675 mirna_pc  |
| 13615 hsa-mir-324 | TRA2B    | 0.417412764 mirna_pc |
| 13616 hsa-mir-324 | RSRC1    | 0.387562128 mirna_pc |
| 13617 hsa-mir-324 | GAR1     | 0.467575047 mirna_pc |
| 13618 hsa-mir-324 | C15orf23 | 0.421018499 mirna_pc |
| 13619 hsa-mir-324 | CIRH1A   | 0.310076015 mirna_pc |
| 13620 hsa-mir-324 | C3orf21  | 0.363429028 mirna_pc |
| 13621 hsa-mir-324 | SLMO1    | 0.32988392 mirna_pc  |
| 13622 hsa-mir-324 | PSMD12   | 0.306852182 mirna_pc |
| 13623 hsa-mir-324 | ZNF668   | 0.32098992 mirna_pc  |
| 13624 hsa-mir-324 | DIABLO   | 0.341044634 mirna_pc |
| 13625 hsa-mir-324 | C1QBP    | 0.501917279 mirna_pc |
| 13626 hsa-mir-324 | SAE1     | 0.389886516 mirna_pc |
| 13627 hsa-mir-324 | ITGB3BP  | 0.322962901 mirna_pc |
| 13628 hsa-mir-324 | ENOPH1   | 0.38993245 mirna_pc  |
| 13629 hsa-mir-324 | C19orf47 | 0.391521713 mirna_pc |
| 13630 hsa-mir-324 | C4orf43  | 0.436116375 mirna_pc |
| 13631 hsa-mir-324 | XRCC3    | 0.305838857 mirna_pc |
| 13632 hsa-mir-324 | YY1      | 0.304644381 mirna_pc |
| 13633 hsa-mir-324 | DDX55    | 0.315045815 mirna_pc |
| 13634 hsa-mir-324 | C16orf80 | 0.377652879 mirna_pc |
| 13635 hsa-mir-324 | MYBBP1A  | 0.401357853 mirna_pc |
| 13636 hsa-mir-324 | PLEKHG4  | 0.392475296 mirna_pc |
| 13637 hsa-mir-324 | SFPQ     | 0.438439658 mirna_pc |
| 13638 hsa-mir-324 | VPS72    | 0.322818572 mirna_pc |
| 13639 hsa-mir-324 | EIF4EBP1 | 0.347005575 mirna_pc |
| 13640 hsa-mir-324 | CADM1    | 0.415813902 mirna_pc |
| 13641 hsa-mir-324 | SHMT2    | 0.315879493 mirna_pc |
| 13642 hsa-mir-324 | POLA1    | 0.324967131 mirna_pc |
| 13643 hsa-mir-324 | HDAC2    | 0.36778382 mirna_pc  |
| 13644 hsa-mir-324 | GMNN     | 0.364141213 mirna_pc |
| 13645 hsa-mir-324 | EMG1     | 0.30783578 mirna_pc  |
| 13646 hsa-mir-324 | PA2G4P4  | 0.325885796 mirna_pc |
| 13647 hsa-mir-324 | CPNE2    | 0.363698499 mirna_pc |
| 13648 hsa-mir-324 | ALOX12P2 | 0.383911603 mirna_pc |
| 13649 hsa-mir-324 | ANKRD32  | 0.32276418 mirna_pc  |
| 13650 hsa-mir-324 | CHRA1    | 0.312625551 mirna_pc |
| 13651 hsa-mir-324 | PDAP1    | 0.33261437 mirna_pc  |
| 13652 hsa-mir-324 | RNF7     | 0.390686743 mirna_pc |
| 13653 hsa-mir-324 | SALL2    | 0.352694652 mirna_pc |
| 13654 hsa-mir-324 | DCK      | 0.310820693 mirna_pc |
| 13655 hsa-mir-324 | GEMIN6   | 0.313896137 mirna_pc |
| 13656 hsa-mir-324 | RNMTL1   | 0.329791622 mirna_pc |
| 13657 hsa-mir-324 | FAM86C   | 0.318155552 mirna_pc |
| 13658 hsa-mir-324 | ANKRD39  | 0.347423263 mirna_pc |
| 13659 hsa-mir-324 | PTCD1    | 0.362440634 mirna_pc |
| 13660 hsa-mir-324 | CRIP1    | 0.415992226 mirna_pc |
| 13661 hsa-mir-324 | MSH6     | 0.527628749 mirna_pc |

|                   |           |                      |
|-------------------|-----------|----------------------|
| 13662 hsa-mir-324 | SOX4      | 0.322402479 mirna_pc |
| 13663 hsa-mir-324 | XRN2      | 0.311071046 mirna_pc |
| 13664 hsa-mir-324 | C3orf34   | 0.370796736 mirna_pc |
| 13665 hsa-mir-324 | TPRKB     | 0.319848537 mirna_pc |
| 13666 hsa-mir-324 | TP73      | 0.338854364 mirna_pc |
| 13667 hsa-mir-324 | C17orf100 | 0.30235379 mirna_pc  |
| 13668 hsa-mir-324 | KPNB1     | 0.349182415 mirna_pc |
| 13669 hsa-mir-324 | XRCC6     | 0.311851044 mirna_pc |
| 13670 hsa-mir-324 | LEF1      | 0.362673075 mirna_pc |
| 13671 hsa-mir-324 | SMC3      | 0.305177563 mirna_pc |
| 13672 hsa-mir-324 | POLB      | 0.318059194 mirna_pc |
| 13673 hsa-mir-324 | ACBD6     | 0.365301696 mirna_pc |
| 13674 hsa-mir-324 | HNRNPA1   | 0.371246055 mirna_pc |
| 13675 hsa-mir-324 | PPP1R8    | 0.395139192 mirna_pc |
| 13676 hsa-mir-324 | CDK2AP1   | 0.370599223 mirna_pc |
| 13677 hsa-mir-324 | ANKRD13B  | 0.311054695 mirna_pc |
| 13678 hsa-mir-324 | NUDT3     | 0.386094271 mirna_pc |
| 13679 hsa-mir-324 | SMARCA1   | 0.310379647 mirna_pc |
| 13680 hsa-mir-324 | MEX3A     | 0.49349182 mirna_pc  |
| 13681 hsa-mir-324 | COIL      | 0.30777397 mirna_pc  |
| 13682 hsa-mir-324 | RFC2      | 0.38255546 mirna_pc  |
| 13683 hsa-mir-324 | TAF5      | 0.351415093 mirna_pc |
| 13684 hsa-mir-324 | TRIM28    | 0.372022341 mirna_pc |
| 13685 hsa-mir-324 | EXOSC4    | 0.337259389 mirna_pc |
| 13686 hsa-mir-324 | SCRIB     | 0.308439706 mirna_pc |
| 13687 hsa-mir-324 | APEX1     | 0.380334781 mirna_pc |
| 13688 hsa-mir-324 | MAD2L2    | 0.327617559 mirna_pc |
| 13689 hsa-mir-324 | HNRNPA1L2 | 0.406772999 mirna_pc |
| 13690 hsa-mir-324 | NAA15     | 0.320388219 mirna_pc |
| 13691 hsa-mir-324 | CBX1      | 0.48513721 mirna_pc  |
| 13692 hsa-mir-324 | EMILIN3   | 0.414194799 mirna_pc |
| 13693 hsa-mir-324 | ZBTB12    | 0.39333699 mirna_pc  |
| 13694 hsa-mir-324 | TADA1     | 0.312024625 mirna_pc |
| 13695 hsa-mir-324 | DUSP12    | 0.331220522 mirna_pc |
| 13696 hsa-mir-324 | LOC642846 | 0.379006028 mirna_pc |
| 13697 hsa-mir-324 | TGIF2     | 0.355389136 mirna_pc |
| 13698 hsa-mir-324 | C16orf87  | 0.307940186 mirna_pc |
| 13699 hsa-mir-324 | SENP1     | 0.370840829 mirna_pc |
| 13700 hsa-mir-324 | ERI3      | 0.400641672 mirna_pc |
| 13701 hsa-mir-324 | RCN2      | 0.412659454 mirna_pc |
| 13702 hsa-mir-324 | THUMP2    | 0.348680633 mirna_pc |
| 13703 hsa-mir-324 | TARBP2    | 0.39468917 mirna_pc  |
| 13704 hsa-mir-324 | ZNF256    | 0.366378173 mirna_pc |
| 13705 hsa-mir-324 | NOL10     | 0.414472931 mirna_pc |
| 13706 hsa-mir-324 | DDX47     | 0.347180992 mirna_pc |
| 13707 hsa-mir-324 | POLE      | 0.378720877 mirna_pc |
| 13708 hsa-mir-324 | C8orf30A  | 0.326417042 mirna_pc |
| 13709 hsa-mir-324 | WRNIP1    | 0.415443508 mirna_pc |
| 13710 hsa-mir-324 | ERF       | 0.324474779 mirna_pc |
| 13711 hsa-mir-324 | TAF1B     | 0.358160662 mirna_pc |
| 13712 hsa-mir-324 | OGFOD1    | 0.31014665 mirna_pc  |
| 13713 hsa-mir-324 | TIMM50    | 0.333913575 mirna_pc |
| 13714 hsa-mir-324 | XRCC6BP1  | 0.375284575 mirna_pc |
| 13715 hsa-mir-324 | ADSL      | 0.366902019 mirna_pc |

|                   |           |                      |
|-------------------|-----------|----------------------|
| 13716 hsa-mir-324 | VRK1      | 0.32508223 mirna_pc  |
| 13717 hsa-mir-324 | RIOK1     | 0.38917811 mirna_pc  |
| 13718 hsa-mir-324 | EXOSC9    | 0.544755346 mirna_pc |
| 13719 hsa-mir-324 | FOXRED2   | 0.367413871 mirna_pc |
| 13720 hsa-mir-324 | UNG       | 0.466960446 mirna_pc |
| 13721 hsa-mir-324 | RBMX      | 0.385565871 mirna_pc |
| 13722 hsa-mir-324 | CDK16     | 0.332442764 mirna_pc |
| 13723 hsa-mir-324 | ALKBH2    | 0.407954258 mirna_pc |
| 13724 hsa-mir-324 | USP10     | 0.312685491 mirna_pc |
| 13725 hsa-mir-324 | GPC3      | 0.351004879 mirna_pc |
| 13726 hsa-mir-324 | MLF 2.00  | 0.339364316 mirna_pc |
| 13727 hsa-mir-324 | XRCC5     | 0.313481496 mirna_pc |
| 13728 hsa-mir-324 | RPF2      | 0.317849822 mirna_pc |
| 13729 hsa-mir-324 | CTCF      | 0.336595077 mirna_pc |
| 13730 hsa-mir-324 | RPL39L    | 0.335709098 mirna_pc |
| 13731 hsa-mir-324 | ACD       | 0.300074108 mirna_pc |
| 13732 hsa-mir-324 | GPN3      | 0.412098821 mirna_pc |
| 13733 hsa-mir-324 | ASB3      | 0.363139037 mirna_pc |
| 13734 hsa-mir-324 | LOC152217 | 0.368064658 mirna_pc |
| 13735 hsa-mir-324 | MEMO1     | 0.344255178 mirna_pc |
| 13736 hsa-mir-324 | IGSF9     | 0.404644808 mirna_pc |
| 13737 hsa-mir-324 | UBXN2A    | 0.349636045 mirna_pc |
| 13738 hsa-mir-324 | DNAJC14   | 0.319994296 mirna_pc |
| 13739 hsa-mir-324 | FIP1L1    | 0.413819753 mirna_pc |
| 13740 hsa-mir-324 | KDM2B     | 0.357223943 mirna_pc |
| 13741 hsa-mir-324 | TRAP1     | 0.328882223 mirna_pc |
| 13742 hsa-mir-324 | NUDT21    | 0.332738318 mirna_pc |
| 13743 hsa-mir-324 | GTF3C2    | 0.310066288 mirna_pc |
| 13744 hsa-mir-324 | MAGEF1    | 0.464886507 mirna_pc |
| 13745 hsa-mir-324 | PCGF6     | 0.341266847 mirna_pc |
| 13746 hsa-mir-324 | SUPT3H    | 0.351949586 mirna_pc |
| 13747 hsa-mir-324 | SOX12     | 0.343229468 mirna_pc |
| 13748 hsa-mir-324 | MNAT1     | 0.311211145 mirna_pc |
| 13749 hsa-mir-324 | SMARCB1   | 0.427498464 mirna_pc |
| 13750 hsa-mir-324 | PYG02     | 0.321515876 mirna_pc |
| 13751 hsa-mir-324 | CCT8      | 0.320847258 mirna_pc |
| 13752 hsa-mir-324 | TTC32     | 0.316755031 mirna_pc |
| 13753 hsa-mir-324 | SMN2      | 0.305635268 mirna_pc |
| 13754 hsa-mir-324 | U2AF1     | 0.339572608 mirna_pc |
| 13755 hsa-mir-324 | B4GALT2   | 0.315346361 mirna_pc |
| 13756 hsa-mir-324 | RPA1      | 0.502073109 mirna_pc |
| 13757 hsa-mir-324 | FAM92A1   | 0.379766876 mirna_pc |
| 13758 hsa-mir-324 | ZNF639    | 0.454642516 mirna_pc |
| 13759 hsa-mir-324 | TTC5      | 0.315935509 mirna_pc |
| 13760 hsa-mir-324 | SART1     | 0.304120993 mirna_pc |
| 13761 hsa-mir-324 | ITPRIPL1  | 0.356549896 mirna_pc |
| 13762 hsa-mir-324 | FOXK2     | 0.36547743 mirna_pc  |
| 13763 hsa-mir-324 | ANAPC10   | 0.322225404 mirna_pc |
| 13764 hsa-mir-324 | ABT1      | 0.306616302 mirna_pc |
| 13765 hsa-mir-324 | TIGD5     | 0.336075585 mirna_pc |
| 13766 hsa-mir-324 | METAP1    | 0.339765016 mirna_pc |
| 13767 hsa-mir-324 | C20orf177 | 0.343412197 mirna_pc |
| 13768 hsa-mir-324 | SLC25A17  | 0.329658452 mirna_pc |
| 13769 hsa-mir-324 | UBXN7     | 0.329808672 mirna_pc |

|                   |          |                      |
|-------------------|----------|----------------------|
| 13770 hsa-mir-324 | FXR2     | 0.447703227 mirna_pc |
| 13771 hsa-mir-324 | ATXN7L2  | 0.332200591 mirna_pc |
| 13772 hsa-mir-324 | FAM189B  | 0.357763241 mirna_pc |
| 13773 hsa-mir-324 | MKRN3    | 0.384323125 mirna_pc |
| 13774 hsa-mir-324 | PABPN1   | 0.320494525 mirna_pc |
| 13775 hsa-mir-324 | METAP2   | 0.378938069 mirna_pc |
| 13776 hsa-mir-324 | CLNS1A   | 0.359657195 mirna_pc |
| 13777 hsa-mir-324 | NEURL4   | 0.330198492 mirna_pc |
| 13778 hsa-mir-324 | DVL3     | 0.333838539 mirna_pc |
| 13779 hsa-mir-324 | BCL7A    | 0.475799243 mirna_pc |
| 13780 hsa-mir-324 | LAMA1    | 0.338655733 mirna_pc |
| 13781 hsa-mir-324 | MRPS28   | 0.367464297 mirna_pc |
| 13782 hsa-mir-324 | DVL2     | 0.578704847 mirna_pc |
| 13783 hsa-mir-324 | C7orf44  | 0.324122865 mirna_pc |
| 13784 hsa-mir-324 | NUDCD2   | 0.303830222 mirna_pc |
| 13785 hsa-mir-324 | GCAT     | 0.334318724 mirna_pc |
| 13786 hsa-mir-324 | WDR70    | 0.342214332 mirna_pc |
| 13787 hsa-mir-324 | ARHGAP19 | 0.363728661 mirna_pc |
| 13788 hsa-mir-324 | ZNF286A  | 0.468983134 mirna_pc |
| 13789 hsa-mir-324 | FAM171A2 | 0.380981646 mirna_pc |
| 13790 hsa-mir-324 | PARP2    | 0.311954032 mirna_pc |
| 13791 hsa-mir-324 | MRPL21   | 0.410844035 mirna_pc |
| 13792 hsa-mir-324 | TCEA1    | 0.348277534 mirna_pc |
| 13793 hsa-mir-324 | NLE1     | 0.414264759 mirna_pc |
| 13794 hsa-mir-324 | FXR1     | 0.392060279 mirna_pc |
| 13795 hsa-mir-324 | DMRTA2   | 0.355929102 mirna_pc |
| 13796 hsa-mir-324 | CHST10   | 0.309379566 mirna_pc |
| 13797 hsa-mir-324 | MRPS22   | 0.307940489 mirna_pc |
| 13798 hsa-mir-324 | ALS2CR4  | 0.304640863 mirna_pc |
| 13799 hsa-mir-324 | PSPH     | 0.446489047 mirna_pc |
| 13800 hsa-mir-324 | EVC2     | 0.302192331 mirna_pc |
| 13801 hsa-mir-324 | PRR3     | 0.397172479 mirna_pc |
| 13802 hsa-mir-324 | MGC72080 | 0.314652678 mirna_pc |
| 13803 hsa-mir-324 | CYB5D1   | 0.304735881 mirna_pc |
| 13804 hsa-mir-324 | CNTR0B   | 0.526871733 mirna_pc |
| 13805 hsa-mir-324 | TRMT61B  | 0.388467747 mirna_pc |
| 13806 hsa-mir-324 | TSFM     | 0.314462906 mirna_pc |
| 13807 hsa-mir-324 | RAD1     | 0.337653221 mirna_pc |
| 13808 hsa-mir-324 | SEMA4F   | 0.412904611 mirna_pc |
| 13809 hsa-mir-324 | RNASEN   | 0.334662293 mirna_pc |
| 13810 hsa-mir-324 | MPV17    | 0.301513997 mirna_pc |
| 13811 hsa-mir-324 | ZNF286B  | 0.43900241 mirna_pc  |
| 13812 hsa-mir-324 | DDX20    | 0.389443028 mirna_pc |
| 13813 hsa-mir-324 | Clorf109 | 0.338105609 mirna_pc |
| 13814 hsa-mir-324 | CHCHD2   | 0.31439795 mirna_pc  |
| 13815 hsa-mir-324 | PIGX     | 0.365774139 mirna_pc |
| 13816 hsa-mir-324 | MTA1     | 0.386298515 mirna_pc |
| 13817 hsa-mir-324 | HTRA2    | 0.353351279 mirna_pc |
| 13818 hsa-mir-324 | MTA3     | 0.303641241 mirna_pc |
| 13819 hsa-mir-324 | DPH1     | 0.3597389 mirna_pc   |
| 13820 hsa-mir-324 | PFN2     | 0.370902126 mirna_pc |
| 13821 hsa-mir-324 | INTU     | 0.388734305 mirna_pc |
| 13822 hsa-mir-324 | ATP6V1E2 | 0.373566382 mirna_pc |
| 13823 hsa-mir-324 | CCNB1IP1 | 0.433600031 mirna_pc |

|                   |           |                      |
|-------------------|-----------|----------------------|
| 13824 hsa-mir-324 | NHP2L1    | 0.305435899 mirna_pc |
| 13825 hsa-mir-324 | GPR3      | 0.360125009 mirna_pc |
| 13826 hsa-mir-324 | E2F6      | 0.377657724 mirna_pc |
| 13827 hsa-mir-324 | DRG1      | 0.351703805 mirna_pc |
| 13828 hsa-mir-324 | SSSCA1    | 0.302714627 mirna_pc |
| 13829 hsa-mir-324 | NOL7      | 0.382556163 mirna_pc |
| 13830 hsa-mir-324 | PRPSAP2   | 0.43758955 mirna_pc  |
| 13831 hsa-mir-324 | SEN3      | 0.537867713 mirna_pc |
| 13832 hsa-mir-324 | CPSF4     | 0.34523197 mirna_pc  |
| 13833 hsa-mir-324 | HUNK      | 0.321518056 mirna_pc |
| 13834 hsa-mir-324 | ACTR6     | 0.328767173 mirna_pc |
| 13835 hsa-mir-324 | SCLY      | 0.306084991 mirna_pc |
| 13836 hsa-mir-324 | RNF167    | 0.300475356 mirna_pc |
| 13837 hsa-mir-324 | NT5C      | 0.302833459 mirna_pc |
| 13838 hsa-mir-324 | STARD7    | 0.308667103 mirna_pc |
| 13839 hsa-mir-324 | GPR125    | 0.328933849 mirna_pc |
| 13840 hsa-mir-324 | PTMS      | 0.340241575 mirna_pc |
| 13841 hsa-mir-324 | SLC4A1AP  | 0.362473765 mirna_pc |
| 13842 hsa-mir-324 | TTC27     | 0.516861751 mirna_pc |
| 13843 hsa-mir-324 | DHRS13    | 0.428516592 mirna_pc |
| 13844 hsa-mir-324 | MCCC1     | 0.323165586 mirna_pc |
| 13845 hsa-mir-324 | ELFN1     | 0.331557239 mirna_pc |
| 13846 hsa-mir-324 | RPF1      | 0.301511929 mirna_pc |
| 13847 hsa-mir-324 | RTTN      | 0.316854962 mirna_pc |
| 13848 hsa-mir-324 | FIBP      | 0.334641401 mirna_pc |
| 13849 hsa-mir-324 | EWSR1     | 0.309138761 mirna_pc |
| 13850 hsa-mir-324 | LOC222699 | 0.446193446 mirna_pc |
| 13851 hsa-mir-324 | KRR1      | 0.342342079 mirna_pc |
| 13852 hsa-mir-324 | DHX57     | 0.469940703 mirna_pc |
| 13853 hsa-mir-324 | ALX3      | 0.31932339 mirna_pc  |
| 13854 hsa-mir-324 | AAAS      | 0.476620358 mirna_pc |
| 13855 hsa-mir-324 | CHST14    | 0.384961672 mirna_pc |
| 13856 hsa-mir-324 | TMEM107   | 0.318497297 mirna_pc |
| 13857 hsa-mir-324 | SUPT7L    | 0.316898653 mirna_pc |
| 13858 hsa-mir-324 | PEMT      | 0.402687246 mirna_pc |
| 13859 hsa-mir-324 | LIG3      | 0.379372734 mirna_pc |
| 13860 hsa-mir-324 | MRPS26    | 0.391101575 mirna_pc |
| 13861 hsa-mir-324 | MRPL30    | 0.435859159 mirna_pc |
| 13862 hsa-mir-324 | PELP1     | 0.523327113 mirna_pc |
| 13863 hsa-mir-324 | METT11D1  | 0.301165369 mirna_pc |
| 13864 hsa-mir-324 | ACPL2     | 0.304456884 mirna_pc |
| 13865 hsa-mir-324 | DHODH     | 0.312456391 mirna_pc |
| 13866 hsa-mir-324 | C11orf45  | 0.342356042 mirna_pc |
| 13867 hsa-mir-324 | CCDC15    | 0.359086601 mirna_pc |
| 13868 hsa-mir-324 | SFRS7     | 0.383952236 mirna_pc |
| 13869 hsa-mir-324 | C18orf10  | 0.37725655 mirna_pc  |
| 13870 hsa-mir-324 | CA5BP     | 0.380902975 mirna_pc |
| 13871 hsa-mir-324 | TRMT2A    | 0.343630474 mirna_pc |
| 13872 hsa-mir-324 | PCBP2     | 0.316899178 mirna_pc |
| 13873 hsa-mir-324 | PFAS      | 0.473471746 mirna_pc |
| 13874 hsa-mir-324 | PET112L   | 0.391321069 mirna_pc |
| 13875 hsa-mir-324 | SF3B2     | 0.348533853 mirna_pc |
| 13876 hsa-mir-324 | SARS2     | 0.337385817 mirna_pc |
| 13877 hsa-mir-324 | C10orf35  | 0.33694666 mirna_pc  |

|                   |           |                      |
|-------------------|-----------|----------------------|
| 13878 hsa-mir-324 | NUP88     | 0.421307671 mirna_pc |
| 13879 hsa-mir-324 | DHX33     | 0.432582129 mirna_pc |
| 13880 hsa-mir-324 | RPUSD2    | 0.311095598 mirna_pc |
| 13881 hsa-mir-324 | THYN1     | 0.323340736 mirna_pc |
| 13882 hsa-mir-324 | EIF2B5    | 0.31132134 mirna_pc  |
| 13883 hsa-mir-324 | NUP153    | 0.405764811 mirna_pc |
| 13884 hsa-mir-324 | NIPSNAP1  | 0.367077465 mirna_pc |
| 13885 hsa-mir-324 | SERBP1    | 0.320830802 mirna_pc |
| 13886 hsa-mir-324 | PARL      | 0.356822082 mirna_pc |
| 13887 hsa-mir-324 | PTOV1     | 0.36760828 mirna_pc  |
| 13888 hsa-mir-324 | HOXA7     | 0.303387661 mirna_pc |
| 13889 hsa-mir-324 | C2orf68   | 0.334898633 mirna_pc |
| 13890 hsa-mir-324 | ATF5      | 0.359033093 mirna_pc |
| 13891 hsa-mir-324 | ANKRD23   | 0.315545854 mirna_pc |
| 13892 hsa-mir-324 | ARHGEF19  | 0.34904782 mirna_pc  |
| 13893 hsa-mir-324 | C17orf75  | 0.430912843 mirna_pc |
| 13894 hsa-mir-324 | TMEM93    | 0.358753395 mirna_pc |
| 13895 hsa-mir-324 | RPL35A    | 0.324682981 mirna_pc |
| 13896 hsa-mir-324 | FBRSL1    | 0.345372069 mirna_pc |
| 13897 hsa-mir-324 | ATXN10    | 0.324235958 mirna_pc |
| 13898 hsa-mir-324 | ZNF771    | 0.372408282 mirna_pc |
| 13899 hsa-mir-324 | EEF1E1    | 0.355142565 mirna_pc |
| 13900 hsa-mir-324 | YBX1      | 0.325068532 mirna_pc |
| 13901 hsa-mir-324 | TCTN2     | 0.346940412 mirna_pc |
| 13902 hsa-mir-324 | C14orf104 | 0.330900502 mirna_pc |
| 13903 hsa-mir-324 | POLR2C    | 0.34768604 mirna_pc  |
| 13904 hsa-mir-324 | PPP2R3B   | 0.303954072 mirna_pc |
| 13905 hsa-mir-324 | C12orf10  | 0.399353939 mirna_pc |
| 13906 hsa-mir-324 | TOP3A     | 0.456121392 mirna_pc |
| 13907 hsa-mir-324 | EXTL2     | 0.360040781 mirna_pc |
| 13908 hsa-mir-324 | UBE2M     | 0.307898152 mirna_pc |
| 13909 hsa-mir-324 | C2orf44   | 0.407431714 mirna_pc |
| 13910 hsa-mir-324 | PSMB6     | 0.413574384 mirna_pc |
| 13911 hsa-mir-324 | SEPHS1    | 0.433527561 mirna_pc |
| 13912 hsa-mir-324 | RMND1     | 0.314375268 mirna_pc |
| 13913 hsa-mir-324 | RYK       | 0.311113258 mirna_pc |
| 13914 hsa-mir-324 | KDM4D     | 0.355770061 mirna_pc |
| 13915 hsa-mir-324 | TMEM11    | 0.363390034 mirna_pc |
| 13916 hsa-mir-324 | GBAS      | 0.34538072 mirna_pc  |
| 13917 hsa-mir-324 | AGBL5     | 0.444131239 mirna_pc |
| 13918 hsa-mir-324 | AIP       | 0.314334203 mirna_pc |
| 13919 hsa-mir-324 | NAB2      | 0.312249066 mirna_pc |
| 13920 hsa-mir-324 | VASH2     | 0.321157153 mirna_pc |
| 13921 hsa-mir-324 | C19orf23  | 0.329198123 mirna_pc |
| 13922 hsa-mir-324 | PHB2      | 0.354014402 mirna_pc |
| 13923 hsa-mir-324 | C8orf33   | 0.362020078 mirna_pc |
| 13924 hsa-mir-324 | ISYNA1    | 0.325560559 mirna_pc |
| 13925 hsa-mir-324 | GPS1      | 0.312037183 mirna_pc |
| 13926 hsa-mir-324 | MYL6B     | 0.502711928 mirna_pc |
| 13927 hsa-mir-324 | PDCD7     | 0.363391666 mirna_pc |
| 13928 hsa-mir-324 | POLR2F    | 0.316248043 mirna_pc |
| 13929 hsa-mir-324 | DTX3      | 0.360108349 mirna_pc |
| 13930 hsa-mir-324 | MED28     | 0.400233905 mirna_pc |
| 13931 hsa-mir-324 | MRPS15    | 0.333773782 mirna_pc |

|                   |           |                      |
|-------------------|-----------|----------------------|
| 13932 hsa-mir-324 | NARS2     | 0.399434354 mirna_pc |
| 13933 hsa-mir-324 | ZFP1      | 0.307581092 mirna_pc |
| 13934 hsa-mir-324 | NME4      | 0.332086916 mirna_pc |
| 13935 hsa-mir-324 | LYRM4     | 0.51222241 mirna_pc  |
| 13936 hsa-mir-324 | BCL11A    | 0.391183628 mirna_pc |
| 13937 hsa-mir-324 | ZNF496    | 0.338409581 mirna_pc |
| 13938 hsa-mir-324 | C4orf27   | 0.438968727 mirna_pc |
| 13939 hsa-mir-324 | USP21     | 0.401810082 mirna_pc |
| 13940 hsa-mir-324 | ALMS1     | 0.331538778 mirna_pc |
| 13941 hsa-mir-324 | SLC25A11  | 0.430578871 mirna_pc |
| 13942 hsa-mir-324 | ZNF74     | 0.365311686 mirna_pc |
| 13943 hsa-mir-324 | METT10D   | 0.39985031 mirna_pc  |
| 13944 hsa-mir-324 | ANP32A    | 0.356200479 mirna_pc |
| 13945 hsa-mir-324 | LOC284023 | 0.349539515 mirna_pc |
| 13946 hsa-mir-324 | SUPV3L1   | 0.346381005 mirna_pc |
| 13947 hsa-mir-324 | DPF2      | 0.382000819 mirna_pc |
| 13948 hsa-mir-324 | LMAN2L    | 0.370733364 mirna_pc |
| 13949 hsa-mir-324 | TCF7L1    | 0.312231404 mirna_pc |
| 13950 hsa-mir-324 | C17orf81  | 0.505067939 mirna_pc |
| 13951 hsa-mir-324 | PHF23     | 0.352352988 mirna_pc |
| 13952 hsa-mir-324 | PPP5C     | 0.398606946 mirna_pc |
| 13953 hsa-mir-324 | HYLS1     | 0.319985369 mirna_pc |
| 13954 hsa-mir-324 | HNRNPH3   | 0.329775146 mirna_pc |
| 13955 hsa-mir-324 | NAP1L1    | 0.374455266 mirna_pc |
| 13956 hsa-mir-324 | PEX5      | 0.324408328 mirna_pc |
| 13957 hsa-mir-324 | RRP1B     | 0.344952086 mirna_pc |
| 13958 hsa-mir-324 | UBTF      | 0.303854641 mirna_pc |
| 13959 hsa-mir-324 | NSL1      | 0.323351305 mirna_pc |
| 13960 hsa-mir-324 | ZNF428    | 0.305976723 mirna_pc |
| 13961 hsa-mir-324 | CNIH2     | 0.394193161 mirna_pc |
| 13962 hsa-mir-324 | ELAC2     | 0.300956449 mirna_pc |
| 13963 hsa-mir-324 | LOC400657 | 0.326316362 mirna_pc |
| 13964 hsa-mir-324 | IQCC      | 0.337744257 mirna_pc |
| 13965 hsa-mir-324 | MGC70857  | 0.303440512 mirna_pc |
| 13966 hsa-mir-324 | DDX19A    | 0.323235163 mirna_pc |
| 13967 hsa-mir-324 | LSMD1     | 0.303853628 mirna_pc |
| 13968 hsa-mir-324 | HNRNPA0   | 0.367873689 mirna_pc |
| 13969 hsa-mir-324 | MORN2     | 0.343290886 mirna_pc |
| 13970 hsa-mir-324 | BMP7      | 0.31089492 mirna_pc  |
| 13971 hsa-mir-324 | DERL2     | 0.332323131 mirna_pc |
| 13972 hsa-mir-324 | C12orf41  | 0.350967118 mirna_pc |
| 13973 hsa-mir-324 | SETD6     | 0.316275092 mirna_pc |
| 13974 hsa-mir-324 | RTN4RL1   | 0.352530267 mirna_pc |
| 13975 hsa-mir-324 | TFDP2     | 0.335855917 mirna_pc |
| 13976 hsa-mir-324 | MLLT11    | 0.384946912 mirna_pc |
| 13977 hsa-mir-324 | TSPYL3    | 0.310724288 mirna_pc |
| 13978 hsa-mir-324 | AASDHPPT  | 0.312924204 mirna_pc |
| 13979 hsa-mir-324 | TRAPPC1   | 0.363532663 mirna_pc |
| 13980 hsa-mir-324 | C12orf24  | 0.322987099 mirna_pc |
| 13981 hsa-mir-324 | PRPF8     | 0.324706608 mirna_pc |
| 13982 hsa-mir-324 | EFCAB7    | 0.332415488 mirna_pc |
| 13983 hsa-mir-324 | DCAF16    | 0.378139072 mirna_pc |
| 13984 hsa-mir-324 | MTERF     | 0.345518513 mirna_pc |
| 13985 hsa-mir-324 | SBK1      | 0.40926803 mirna_pc  |

|                   |           |                      |
|-------------------|-----------|----------------------|
| 13986 hsa-mir-324 | PABPC4L   | 0.311268151 mirna_pc |
| 13987 hsa-mir-324 | C21orf67  | 0.338595594 mirna_pc |
| 13988 hsa-mir-324 | THNSL1    | 0.31603332 mirna_pc  |
| 13989 hsa-mir-324 | USP13     | 0.418983137 mirna_pc |
| 13990 hsa-mir-324 | GALNT14   | 0.450480766 mirna_pc |
| 13991 hsa-mir-324 | TSR1      | 0.439854694 mirna_pc |
| 13992 hsa-mir-324 | DRG2      | 0.375417286 mirna_pc |
| 13993 hsa-mir-324 | SCO1      | 0.334042471 mirna_pc |
| 13994 hsa-mir-324 | SLC25A33  | 0.386326322 mirna_pc |
| 13995 hsa-mir-324 | RANGRF    | 0.401482645 mirna_pc |
| 13996 hsa-mir-324 | HDGFRP3   | 0.301560644 mirna_pc |
| 13997 hsa-mir-324 | CLPB      | 0.315192427 mirna_pc |
| 13998 hsa-mir-324 | FGD1      | 0.312645836 mirna_pc |
| 13999 hsa-mir-324 | ZNF740    | 0.331538903 mirna_pc |
| 14000 hsa-mir-324 | TRO       | 0.379716576 mirna_pc |
| 14001 hsa-mir-324 | DDX51     | 0.350964031 mirna_pc |
| 14002 hsa-mir-324 | PBX2      | 0.33660295 mirna_pc  |
| 14003 hsa-mir-324 | ZNF232    | 0.402163604 mirna_pc |
| 14004 hsa-mir-324 | ZBTB39    | 0.381443287 mirna_pc |
| 14005 hsa-mir-324 | ENO3      | 0.343760131 mirna_pc |
| 14006 hsa-mir-324 | RPAIN     | 0.493561788 mirna_pc |
| 14007 hsa-mir-324 | DTNB      | 0.340004538 mirna_pc |
| 14008 hsa-mir-324 | RAC3      | 0.343749014 mirna_pc |
| 14009 hsa-mir-324 | RBBP4     | 0.387337128 mirna_pc |
| 14010 hsa-mir-324 | LOC221710 | 0.359490476 mirna_pc |
| 14011 hsa-mir-324 | MRPL1     | 0.374044259 mirna_pc |
| 14012 hsa-mir-324 | C21orf91  | 0.311161571 mirna_pc |
| 14013 hsa-mir-324 | SOD1      | 0.367443009 mirna_pc |
| 14014 hsa-mir-324 | SPATS2    | 0.345410757 mirna_pc |
| 14015 hsa-mir-324 | SMYD4     | 0.372535839 mirna_pc |
| 14016 hsa-mir-324 | USP28     | 0.42069908 mirna_pc  |
| 14017 hsa-mir-324 | C2orf3    | 0.396646041 mirna_pc |
| 14018 hsa-mir-324 | DGCR6     | 0.313615077 mirna_pc |
| 14019 hsa-mir-324 | C18orf22  | 0.30744612 mirna_pc  |
| 14020 hsa-mir-324 | MEAF6     | 0.300851838 mirna_pc |
| 14021 hsa-mir-324 | RRP7B     | 0.317682837 mirna_pc |
| 14022 hsa-mir-324 | DNAJC19   | 0.339612174 mirna_pc |
| 14023 hsa-mir-324 | LRDD      | 0.30023836 mirna_pc  |
| 14024 hsa-mir-324 | CCDC157   | 0.307361596 mirna_pc |
| 14025 hsa-mir-324 | MYH10     | 0.329772449 mirna_pc |
| 14026 hsa-mir-324 | SCML2     | 0.301905912 mirna_pc |
| 14027 hsa-mir-324 | C12orf65  | 0.303138627 mirna_pc |
| 14028 hsa-mir-324 | ZNF594    | 0.317966557 mirna_pc |
| 14029 hsa-mir-324 | MRPL19    | 0.329095098 mirna_pc |
| 14030 hsa-mir-324 | HSF2      | 0.364611285 mirna_pc |
| 14031 hsa-mir-324 | ZCCHC11   | 0.332105397 mirna_pc |
| 14032 hsa-mir-324 | BCAM      | 0.316026434 mirna_pc |
| 14033 hsa-mir-324 | DULLARD   | 0.391409512 mirna_pc |
| 14034 hsa-mir-324 | LLGL1     | 0.315788635 mirna_pc |
| 14035 hsa-mir-324 | CETN3     | 0.37828366 mirna_pc  |
| 14036 hsa-mir-324 | ETV5      | 0.397398741 mirna_pc |
| 14037 hsa-mir-324 | B9D1      | 0.388701348 mirna_pc |
| 14038 hsa-mir-324 | DYNC1I1   | 0.309801977 mirna_pc |
| 14039 hsa-mir-324 | KIAA1430  | 0.321789319 mirna_pc |



|       |              |           |             |          |
|-------|--------------|-----------|-------------|----------|
| 14040 | hsa-mir-324  | EXOSC6    | 0.338399891 | mirna_pc |
| 14041 | hsa-mir-324  | PLRG1     | 0.32498722  | mirna_pc |
| 14042 | hsa-mir-324  | AADAT     | 0.332380171 | mirna_pc |
| 14043 | hsa-mir-324  | IGHMBP2   | 0.357698311 | mirna_pc |
| 14044 | hsa-mir-324  | FDX1L     | 0.36806038  | mirna_pc |
| 14045 | hsa-mir-324  | ACTR3B    | 0.353211758 | mirna_pc |
| 14046 | hsa-mir-324  | ZNF322A   | 0.316844016 | mirna_pc |
| 14047 | hsa-mir-324  | CDAN1     | 0.311012652 | mirna_pc |
| 14048 | hsa-mir-324  | C11orf51  | 0.331433607 | mirna_pc |
| 14049 | hsa-mir-324  | MAGED4B   | 0.358271049 | mirna_pc |
| 14050 | hsa-mir-324  | SERF1A    | 0.392560897 | mirna_pc |
| 14051 | hsa-mir-324  | PLD6      | 0.30441229  | mirna_pc |
| 14052 | hsa-mir-324  | GEMIN4    | 0.354452077 | mirna_pc |
| 14053 | hsa-mir-324  | B4GALNT4  | 0.377087605 | mirna_pc |
| 14054 | hsa-mir-324  | LOC401397 | 0.31730453  | mirna_pc |
| 14055 | hsa-mir-324  | GPS2      | 0.36179715  | mirna_pc |
| 14056 | hsa-mir-324  | HSDL1     | 0.351867671 | mirna_pc |
| 14057 | hsa-mir-324  | C21orf119 | 0.354783711 | mirna_pc |
| 14058 | hsa-mir-324  | KLHL13    | 0.323953314 | mirna_pc |
| 14059 | hsa-mir-324  | H2AFY2    | 0.457086677 | mirna_pc |
| 14060 | hsa-mir-324  | MIS12     | 0.375033249 | mirna_pc |
| 14061 | hsa-mir-324  | MLF 1.00  | 0.364928372 | mirna_pc |
| 14062 | hsa-mir-324  | BOD1      | 0.326632013 | mirna_pc |
| 14063 | hsa-mir-324  | TMEM14B   | 0.324265968 | mirna_pc |
| 14064 | hsa-mir-324  | SMARCAD1  | 0.338331692 | mirna_pc |
| 14065 | hsa-mir-324  | SCHIP1    | 0.323520412 | mirna_pc |
| 14066 | hsa-mir-324  | VPS37D    | 0.371396253 | mirna_pc |
| 14067 | hsa-mir-324  | SV2A      | 0.344075773 | mirna_pc |
| 14068 | hsa-mir-324  | NT5M      | 0.381889188 | mirna_pc |
| 14069 | hsa-mir-324  | SEMA4C    | 0.426473285 | mirna_pc |
| 14070 | hsa-mir-324  | THOC5     | 0.377005366 | mirna_pc |
| 14071 | hsa-mir-324  | EFNB3     | 0.45093282  | mirna_pc |
| 14072 | hsa-mir-324  | C21orf70  | 0.360645813 | mirna_pc |
| 14073 | hsa-mir-324  | NRSN2     | 0.316147894 | mirna_pc |
| 14074 | hsa-mir-324  | VANGL2    | 0.307416252 | mirna_pc |
| 14075 | hsa-mir-324  | DNMT3A    | 0.416902    | mirna_pc |
| 14076 | hsa-mir-324  | COPS3     | 0.456813634 | mirna_pc |
| 14077 | hsa-mir-324  | BPHL      | 0.326111848 | mirna_pc |
| 14078 | hsa-mir-324  | ACCN2     | 0.330886664 | mirna_pc |
| 14079 | hsa-mir-324  | C12orf73  | 0.326323619 | mirna_pc |
| 14080 | hsa-mir-324  | PATZ1     | 0.344624688 | mirna_pc |
| 14081 | hsa-mir-324  | TIMM22    | 0.393706434 | mirna_pc |
| 14082 | hsa-mir-324  | ZNF326    | 0.324443416 | mirna_pc |
| 14083 | hsa-mir-3615 | KPNA2     | 0.354638577 | mirna_pc |
| 14084 | hsa-mir-3615 | RCC2      | 0.324791367 | mirna_pc |
| 14085 | hsa-mir-3615 | HOXC9     | 0.311050488 | mirna_pc |
| 14086 | hsa-mir-3615 | RRM2      | 0.410607809 | mirna_pc |
| 14087 | hsa-mir-3615 | BUB1B     | 0.307366119 | mirna_pc |
| 14088 | hsa-mir-3615 | CCNA2     | 0.345017271 | mirna_pc |
| 14089 | hsa-mir-3615 | FANCI     | 0.30446714  | mirna_pc |
| 14090 | hsa-mir-3615 | DDX39     | 0.381170551 | mirna_pc |
| 14091 | hsa-mir-3615 | NCAPH     | 0.32224781  | mirna_pc |
| 14092 | hsa-mir-3615 | CENPA     | 0.342792724 | mirna_pc |
| 14093 | hsa-mir-3615 | MAD2L1    | 0.362072905 | mirna_pc |

|                    |          |                      |
|--------------------|----------|----------------------|
| 14094 hsa-mir-3615 | TIMELESS | 0.306435627 mirna_pc |
| 14095 hsa-mir-3615 | LMNB1    | 0.329652006 mirna_pc |
| 14096 hsa-mir-3615 | TROAP    | 0.383805249 mirna_pc |
| 14097 hsa-mir-3615 | CDC45    | 0.33999149 mirna_pc  |
| 14098 hsa-mir-3615 | TK1      | 0.361412847 mirna_pc |
| 14099 hsa-mir-3615 | DKC1     | 0.342813133 mirna_pc |
| 14100 hsa-mir-3615 | TUBB     | 0.324344181 mirna_pc |
| 14101 hsa-mir-3615 | KIAA0101 | 0.306110637 mirna_pc |
| 14102 hsa-mir-3615 | CCNF     | 0.312246799 mirna_pc |
| 14103 hsa-mir-3615 | PTBP1    | 0.319808364 mirna_pc |
| 14104 hsa-mir-3615 | PLK4     | 0.331689828 mirna_pc |
| 14105 hsa-mir-3615 | SKA3     | 0.338328707 mirna_pc |
| 14106 hsa-mir-3615 | HJURP    | 0.320430698 mirna_pc |
| 14107 hsa-mir-3615 | BLM      | 0.318171015 mirna_pc |
| 14108 hsa-mir-3615 | NME1     | 0.385720978 mirna_pc |
| 14109 hsa-mir-3615 | PAICS    | 0.330235323 mirna_pc |
| 14110 hsa-mir-3615 | BIRC5    | 0.489779666 mirna_pc |
| 14111 hsa-mir-3615 | EME1     | 0.366235487 mirna_pc |
| 14112 hsa-mir-3615 | AURKB    | 0.314066423 mirna_pc |
| 14113 hsa-mir-3615 | CDT1     | 0.31447888 mirna_pc  |
| 14114 hsa-mir-3615 | KIF20A   | 0.300030865 mirna_pc |
| 14115 hsa-mir-3615 | CHEK2    | 0.315287708 mirna_pc |
| 14116 hsa-mir-3615 | CDCA3    | 0.332695527 mirna_pc |
| 14117 hsa-mir-3615 | C1orf112 | 0.304413421 mirna_pc |
| 14118 hsa-mir-3615 | C16orf59 | 0.368270059 mirna_pc |
| 14119 hsa-mir-3615 | NEIL3    | 0.308207123 mirna_pc |
| 14120 hsa-mir-3615 | ACTL6A   | 0.388226296 mirna_pc |
| 14121 hsa-mir-3615 | POLD1    | 0.307389076 mirna_pc |
| 14122 hsa-mir-3615 | C12orf48 | 0.316086501 mirna_pc |
| 14123 hsa-mir-3615 | HNRNPL   | 0.38961297 mirna_pc  |
| 14124 hsa-mir-3615 | UBE2S    | 0.330953242 mirna_pc |
| 14125 hsa-mir-3615 | C11orf82 | 0.363970087 mirna_pc |
| 14126 hsa-mir-3615 | HNRNPC   | 0.414644184 mirna_pc |
| 14127 hsa-mir-3615 | RAN      | 0.31748316 mirna_pc  |
| 14128 hsa-mir-3615 | RFWD3    | 0.330332258 mirna_pc |
| 14129 hsa-mir-3615 | RNASEH2A | 0.341902385 mirna_pc |
| 14130 hsa-mir-3615 | EPRI     | 0.325675923 mirna_pc |
| 14131 hsa-mir-3615 | SFRS2    | 0.448290385 mirna_pc |
| 14132 hsa-mir-3615 | UCK2     | 0.378486455 mirna_pc |
| 14133 hsa-mir-3615 | NFKBIL2  | 0.317433642 mirna_pc |
| 14134 hsa-mir-3615 | C15orf42 | 0.300513347 mirna_pc |
| 14135 hsa-mir-3615 | RANBP1   | 0.301453457 mirna_pc |
| 14136 hsa-mir-3615 | SNRPG    | 0.356160532 mirna_pc |
| 14137 hsa-mir-3615 | EIF4A3   | 0.403078427 mirna_pc |
| 14138 hsa-mir-3615 | SNRPA    | 0.432422048 mirna_pc |
| 14139 hsa-mir-3615 | FUS      | 0.347899867 mirna_pc |
| 14140 hsa-mir-3615 | RFC3     | 0.339905673 mirna_pc |
| 14141 hsa-mir-3615 | CHAF1A   | 0.37879538 mirna_pc  |
| 14142 hsa-mir-3615 | GINS4    | 0.417539162 mirna_pc |
| 14143 hsa-mir-3615 | ANP32E   | 0.316747996 mirna_pc |
| 14144 hsa-mir-3615 | CENPO    | 0.338260624 mirna_pc |
| 14145 hsa-mir-3615 | C19orf48 | 0.322939383 mirna_pc |
| 14146 hsa-mir-3615 | GEN1     | 0.347521093 mirna_pc |
| 14147 hsa-mir-3615 | HMGB2    | 0.348180487 mirna_pc |

|                    |              |                      |
|--------------------|--------------|----------------------|
| 14148 hsa-mir-3615 | GIN52        | 0.333810229 mirna_pc |
| 14149 hsa-mir-3615 | NOP56        | 0.316400134 mirna_pc |
| 14150 hsa-mir-3615 | DTYMK        | 0.306748934 mirna_pc |
| 14151 hsa-mir-3615 | PRMT1        | 0.419100463 mirna_pc |
| 14152 hsa-mir-3615 | C18orf56     | 0.318202398 mirna_pc |
| 14153 hsa-mir-3615 | NOP2         | 0.366411787 mirna_pc |
| 14154 hsa-mir-3615 | HIST1H2AE    | 0.422158295 mirna_pc |
| 14155 hsa-mir-3615 | CDK4         | 0.341078191 mirna_pc |
| 14156 hsa-mir-3615 | PFDN2        | 0.361070735 mirna_pc |
| 14157 hsa-mir-3615 | CHTF18       | 0.370505832 mirna_pc |
| 14158 hsa-mir-3615 | DLEU2        | 0.371941311 mirna_pc |
| 14159 hsa-mir-3615 | KAT2A        | 0.409710832 mirna_pc |
| 14160 hsa-mir-3615 | CHAF1B       | 0.310517344 mirna_pc |
| 14161 hsa-mir-3615 | DHX34        | 0.301631486 mirna_pc |
| 14162 hsa-mir-3615 | MSH2         | 0.330753284 mirna_pc |
| 14163 hsa-mir-3615 | DBF4         | 0.403326623 mirna_pc |
| 14164 hsa-mir-3615 | SF3B3        | 0.362792196 mirna_pc |
| 14165 hsa-mir-3615 | CDC7         | 0.345918467 mirna_pc |
| 14166 hsa-mir-3615 | YDJC         | 0.400920893 mirna_pc |
| 14167 hsa-mir-3615 | PUS1         | 0.34493609 mirna_pc  |
| 14168 hsa-mir-3615 | NOL11        | 0.389011154 mirna_pc |
| 14169 hsa-mir-3615 | RFC4         | 0.342525129 mirna_pc |
| 14170 hsa-mir-3615 | FIGNL1       | 0.404557829 mirna_pc |
| 14171 hsa-mir-3615 | E2F3         | 0.362068126 mirna_pc |
| 14172 hsa-mir-3615 | SF3B14       | 0.334415804 mirna_pc |
| 14173 hsa-mir-3615 | CDC25A       | 0.3327673 mirna_pc   |
| 14174 hsa-mir-3615 | H2AFZ        | 0.364201317 mirna_pc |
| 14175 hsa-mir-3615 | DDX12        | 0.310870851 mirna_pc |
| 14176 hsa-mir-3615 | CPSF3        | 0.493601302 mirna_pc |
| 14177 hsa-mir-3615 | C21orf45     | 0.436565166 mirna_pc |
| 14178 hsa-mir-3615 | PPM1G        | 0.465545657 mirna_pc |
| 14179 hsa-mir-3615 | TFAP4        | 0.349333947 mirna_pc |
| 14180 hsa-mir-3615 | NUDT5        | 0.364844735 mirna_pc |
| 14181 hsa-mir-3615 | RNPS1        | 0.301301139 mirna_pc |
| 14182 hsa-mir-3615 | DAZAP1       | 0.370111621 mirna_pc |
| 14183 hsa-mir-3615 | CBX8         | 0.445375618 mirna_pc |
| 14184 hsa-mir-3615 | NCL          | 0.327853218 mirna_pc |
| 14185 hsa-mir-3615 | PAFAH1B3     | 0.444053222 mirna_pc |
| 14186 hsa-mir-3615 | DGUOK        | 0.414967495 mirna_pc |
| 14187 hsa-mir-3615 | MRPL47       | 0.312992238 mirna_pc |
| 14188 hsa-mir-3615 | FBL          | 0.356032152 mirna_pc |
| 14189 hsa-mir-3615 | THOP1        | 0.316588742 mirna_pc |
| 14190 hsa-mir-3615 | EXOSC5       | 0.403645765 mirna_pc |
| 14191 hsa-mir-3615 | HNRNPM       | 0.394579139 mirna_pc |
| 14192 hsa-mir-3615 | LSM 12.00    | 0.351139564 mirna_pc |
| 14193 hsa-mir-3615 | PNPT1        | 0.327304873 mirna_pc |
| 14194 hsa-mir-3615 | CCT6A        | 0.335677948 mirna_pc |
| 14195 hsa-mir-3615 | SHFM1        | 0.394237743 mirna_pc |
| 14196 hsa-mir-3615 | LSG1         | 0.339650516 mirna_pc |
| 14197 hsa-mir-3615 | PPIH         | 0.322199479 mirna_pc |
| 14198 hsa-mir-3615 | DHX9         | 0.30788099 mirna_pc  |
| 14199 hsa-mir-3615 | LOC100128191 | 0.348952572 mirna_pc |
| 14200 hsa-mir-3615 | SMYD5        | 0.406008333 mirna_pc |
| 14201 hsa-mir-3615 | SF3A2        | 0.312763989 mirna_pc |

|                    |          |                      |
|--------------------|----------|----------------------|
| 14202 hsa-mir-3615 | TSSC1    | 0.430472741 mirna_pc |
| 14203 hsa-mir-3615 | TLCD1    | 0.303976616 mirna_pc |
| 14204 hsa-mir-3615 | SNRPF    | 0.349794148 mirna_pc |
| 14205 hsa-mir-3615 | SUMO2    | 0.457925045 mirna_pc |
| 14206 hsa-mir-3615 | SFRS1    | 0.415119448 mirna_pc |
| 14207 hsa-mir-3615 | WDR43    | 0.360659054 mirna_pc |
| 14208 hsa-mir-3615 | SNRPA1   | 0.355194244 mirna_pc |
| 14209 hsa-mir-3615 | SMC6     | 0.318934848 mirna_pc |
| 14210 hsa-mir-3615 | UBE2I    | 0.329530708 mirna_pc |
| 14211 hsa-mir-3615 | TIPIN    | 0.405427086 mirna_pc |
| 14212 hsa-mir-3615 | SMARCD1  | 0.347649744 mirna_pc |
| 14213 hsa-mir-3615 | HSPBP1   | 0.355863742 mirna_pc |
| 14214 hsa-mir-3615 | TIGD1    | 0.318415334 mirna_pc |
| 14215 hsa-mir-3615 | PA2G4    | 0.416817114 mirna_pc |
| 14216 hsa-mir-3615 | SNRPD3   | 0.414649403 mirna_pc |
| 14217 hsa-mir-3615 | KHDRBS1  | 0.408320394 mirna_pc |
| 14218 hsa-mir-3615 | LOC92659 | 0.305813639 mirna_pc |
| 14219 hsa-mir-3615 | CCT7     | 0.327787866 mirna_pc |
| 14220 hsa-mir-3615 | METTL1   | 0.332841826 mirna_pc |
| 14221 hsa-mir-3615 | TMEM69   | 0.313529595 mirna_pc |
| 14222 hsa-mir-3615 | GNL2     | 0.38894835 mirna_pc  |
| 14223 hsa-mir-3615 | KRI1     | 0.309375739 mirna_pc |
| 14224 hsa-mir-3615 | RPP40    | 0.411041726 mirna_pc |
| 14225 hsa-mir-3615 | OBFC2B   | 0.308202984 mirna_pc |
| 14226 hsa-mir-3615 | PTMA     | 0.434197607 mirna_pc |
| 14227 hsa-mir-3615 | USP39    | 0.307417985 mirna_pc |
| 14228 hsa-mir-3615 | LRRC8D   | 0.321273672 mirna_pc |
| 14229 hsa-mir-3615 | FBXO22OS | 0.302178646 mirna_pc |
| 14230 hsa-mir-3615 | SUV39H2  | 0.334141274 mirna_pc |
| 14231 hsa-mir-3615 | NAALADL2 | 0.351633295 mirna_pc |
| 14232 hsa-mir-3615 | HNRNPD   | 0.429717041 mirna_pc |
| 14233 hsa-mir-3615 | DPY30    | 0.346927962 mirna_pc |
| 14234 hsa-mir-3615 | MTHFD2   | 0.383768492 mirna_pc |
| 14235 hsa-mir-3615 | SFRS3    | 0.313506231 mirna_pc |
| 14236 hsa-mir-3615 | PNO1     | 0.366281414 mirna_pc |
| 14237 hsa-mir-3615 | CCT4     | 0.305271474 mirna_pc |
| 14238 hsa-mir-3615 | ELAVL1   | 0.385382558 mirna_pc |
| 14239 hsa-mir-3615 | NCAPD3   | 0.425233126 mirna_pc |
| 14240 hsa-mir-3615 | TBC1D7   | 0.435350969 mirna_pc |
| 14241 hsa-mir-3615 | PAK1IP1  | 0.423076092 mirna_pc |
| 14242 hsa-mir-3615 | E2F4     | 0.318234542 mirna_pc |
| 14243 hsa-mir-3615 | PFDN6    | 0.321260951 mirna_pc |
| 14244 hsa-mir-3615 | PGAM5    | 0.329135214 mirna_pc |
| 14245 hsa-mir-3615 | YWHAE    | 0.328679299 mirna_pc |
| 14246 hsa-mir-3615 | C3orf57  | 0.333291214 mirna_pc |
| 14247 hsa-mir-3615 | PDCL3    | 0.335186845 mirna_pc |
| 14248 hsa-mir-3615 | ILF3     | 0.336372539 mirna_pc |
| 14249 hsa-mir-3615 | EHMT2    | 0.352702892 mirna_pc |
| 14250 hsa-mir-3615 | HNRNPAB  | 0.324560167 mirna_pc |
| 14251 hsa-mir-3615 | UBAP2L   | 0.316228811 mirna_pc |
| 14252 hsa-mir-3615 | SFRS9    | 0.307385236 mirna_pc |
| 14253 hsa-mir-3615 | PASK     | 0.325500557 mirna_pc |
| 14254 hsa-mir-3615 | SAAL1    | 0.314778101 mirna_pc |
| 14255 hsa-mir-3615 | KHSRP    | 0.442267578 mirna_pc |

|                    |           |                      |
|--------------------|-----------|----------------------|
| 14256 hsa-mir-3615 | LSM 6.00  | 0.334887457 mirna_pc |
| 14257 hsa-mir-3615 | PRAME     | 0.351047021 mirna_pc |
| 14258 hsa-mir-3615 | MRPS17    | 0.371675693 mirna_pc |
| 14259 hsa-mir-3615 | CBX2      | 0.357136582 mirna_pc |
| 14260 hsa-mir-3615 | SUV39H1   | 0.30092784 mirna_pc  |
| 14261 hsa-mir-3615 | TRA2B     | 0.315804075 mirna_pc |
| 14262 hsa-mir-3615 | GAR1      | 0.417911727 mirna_pc |
| 14263 hsa-mir-3615 | ANAPC7    | 0.352738237 mirna_pc |
| 14264 hsa-mir-3615 | CIRH1A    | 0.308425184 mirna_pc |
| 14265 hsa-mir-3615 | PRMT3     | 0.34462696 mirna_pc  |
| 14266 hsa-mir-3615 | PSMD12    | 0.405498216 mirna_pc |
| 14267 hsa-mir-3615 | C1QBP     | 0.316448947 mirna_pc |
| 14268 hsa-mir-3615 | ENOPH1    | 0.428036124 mirna_pc |
| 14269 hsa-mir-3615 | C19orf47  | 0.364369604 mirna_pc |
| 14270 hsa-mir-3615 | LAS1L     | 0.334174394 mirna_pc |
| 14271 hsa-mir-3615 | C4orf43   | 0.326596706 mirna_pc |
| 14272 hsa-mir-3615 | TUBG1     | 0.346886298 mirna_pc |
| 14273 hsa-mir-3615 | C17orf96  | 0.340135706 mirna_pc |
| 14274 hsa-mir-3615 | PLEKHG4   | 0.360951866 mirna_pc |
| 14275 hsa-mir-3615 | SFPQ      | 0.361720191 mirna_pc |
| 14276 hsa-mir-3615 | AP3M2     | 0.310210237 mirna_pc |
| 14277 hsa-mir-3615 | CNOT3     | 0.307047479 mirna_pc |
| 14278 hsa-mir-3615 | EIF4EBP1  | 0.461379768 mirna_pc |
| 14279 hsa-mir-3615 | CADM1     | 0.32783012 mirna_pc  |
| 14280 hsa-mir-3615 | HDAC2     | 0.322457394 mirna_pc |
| 14281 hsa-mir-3615 | PA2G4P4   | 0.374839265 mirna_pc |
| 14282 hsa-mir-3615 | WDR53     | 0.306455556 mirna_pc |
| 14283 hsa-mir-3615 | ALOX12P2  | 0.304689566 mirna_pc |
| 14284 hsa-mir-3615 | PDAP1     | 0.477203266 mirna_pc |
| 14285 hsa-mir-3615 | RNF7      | 0.416670088 mirna_pc |
| 14286 hsa-mir-3615 | GEMIN6    | 0.436824084 mirna_pc |
| 14287 hsa-mir-3615 | H3F3B     | 0.348359262 mirna_pc |
| 14288 hsa-mir-3615 | PTCD1     | 0.493931786 mirna_pc |
| 14289 hsa-mir-3615 | COX4NB    | 0.33360395 mirna_pc  |
| 14290 hsa-mir-3615 | MSH6      | 0.379388322 mirna_pc |
| 14291 hsa-mir-3615 | SOX4      | 0.346873759 mirna_pc |
| 14292 hsa-mir-3615 | C3orf34   | 0.357147846 mirna_pc |
| 14293 hsa-mir-3615 | TPRKB     | 0.42213886 mirna_pc  |
| 14294 hsa-mir-3615 | POLB      | 0.419501963 mirna_pc |
| 14295 hsa-mir-3615 | ACBD6     | 0.354753159 mirna_pc |
| 14296 hsa-mir-3615 | HNRNPA1   | 0.309592636 mirna_pc |
| 14297 hsa-mir-3615 | NPM1      | 0.378018333 mirna_pc |
| 14298 hsa-mir-3615 | CDK2AP1   | 0.374446907 mirna_pc |
| 14299 hsa-mir-3615 | NUDT3     | 0.44583347 mirna_pc  |
| 14300 hsa-mir-3615 | MEX3A     | 0.364440113 mirna_pc |
| 14301 hsa-mir-3615 | MOGS      | 0.32319266 mirna_pc  |
| 14302 hsa-mir-3615 | ATP5J2    | 0.460321853 mirna_pc |
| 14303 hsa-mir-3615 | COIL      | 0.38304723 mirna_pc  |
| 14304 hsa-mir-3615 | PPAN      | 0.319159849 mirna_pc |
| 14305 hsa-mir-3615 | BUD31     | 0.410616566 mirna_pc |
| 14306 hsa-mir-3615 | FAM117B   | 0.325249129 mirna_pc |
| 14307 hsa-mir-3615 | KARS      | 0.325072524 mirna_pc |
| 14308 hsa-mir-3615 | C16orf88  | 0.43623784 mirna_pc  |
| 14309 hsa-mir-3615 | HNRNPA1L2 | 0.331861844 mirna_pc |

|                    |           |                      |
|--------------------|-----------|----------------------|
| 14310 hsa-mir-3615 | NAA15     | 0.337266501 mirna_pc |
| 14311 hsa-mir-3615 | EMILIN3   | 0.335563382 mirna_pc |
| 14312 hsa-mir-3615 | ZC3H18    | 0.350786903 mirna_pc |
| 14313 hsa-mir-3615 | CHERP     | 0.313252474 mirna_pc |
| 14314 hsa-mir-3615 | FARSB     | 0.309790751 mirna_pc |
| 14315 hsa-mir-3615 | RCN2      | 0.321486025 mirna_pc |
| 14316 hsa-mir-3615 | THUMPD2   | 0.381242917 mirna_pc |
| 14317 hsa-mir-3615 | NOL10     | 0.514631428 mirna_pc |
| 14318 hsa-mir-3615 | SF3A3     | 0.308315171 mirna_pc |
| 14319 hsa-mir-3615 | CTU1      | 0.344881712 mirna_pc |
| 14320 hsa-mir-3615 | POLE      | 0.339846766 mirna_pc |
| 14321 hsa-mir-3615 | WRNIP1    | 0.316128491 mirna_pc |
| 14322 hsa-mir-3615 | TAF1B     | 0.508181846 mirna_pc |
| 14323 hsa-mir-3615 | TIMM50    | 0.365359449 mirna_pc |
| 14324 hsa-mir-3615 | SNORD1C   | 0.341119083 mirna_pc |
| 14325 hsa-mir-3615 | XRCC6BP1  | 0.318872403 mirna_pc |
| 14326 hsa-mir-3615 | ADSL      | 0.321532575 mirna_pc |
| 14327 hsa-mir-3615 | EXOSC9    | 0.419412959 mirna_pc |
| 14328 hsa-mir-3615 | MXD3      | 0.307889718 mirna_pc |
| 14329 hsa-mir-3615 | UNG       | 0.342418439 mirna_pc |
| 14330 hsa-mir-3615 | RBMX      | 0.339630273 mirna_pc |
| 14331 hsa-mir-3615 | ALKBH2    | 0.411686897 mirna_pc |
| 14332 hsa-mir-3615 | RRP1      | 0.332193113 mirna_pc |
| 14333 hsa-mir-3615 | CCDC90A   | 0.377101313 mirna_pc |
| 14334 hsa-mir-3615 | MLF 2.00  | 0.329429615 mirna_pc |
| 14335 hsa-mir-3615 | XRCC5     | 0.338740618 mirna_pc |
| 14336 hsa-mir-3615 | NHLRC1    | 0.329430258 mirna_pc |
| 14337 hsa-mir-3615 | CCDC24    | 0.329108719 mirna_pc |
| 14338 hsa-mir-3615 | PDIA6     | 0.300955469 mirna_pc |
| 14339 hsa-mir-3615 | LOC152217 | 0.305836431 mirna_pc |
| 14340 hsa-mir-3615 | MEMO1     | 0.44880656 mirna_pc  |
| 14341 hsa-mir-3615 | TRAP1     | 0.365092739 mirna_pc |
| 14342 hsa-mir-3615 | GTF3C2    | 0.347012619 mirna_pc |
| 14343 hsa-mir-3615 | MAGEF1    | 0.340377931 mirna_pc |
| 14344 hsa-mir-3615 | ICT1      | 0.396529506 mirna_pc |
| 14345 hsa-mir-3615 | OSTC      | 0.32640099 mirna_pc  |
| 14346 hsa-mir-3615 | FAM136A   | 0.305554592 mirna_pc |
| 14347 hsa-mir-3615 | SMARCB1   | 0.31270272 mirna_pc  |
| 14348 hsa-mir-3615 | CCT8      | 0.328309578 mirna_pc |
| 14349 hsa-mir-3615 | TTC32     | 0.401260788 mirna_pc |
| 14350 hsa-mir-3615 | SMN2      | 0.377690387 mirna_pc |
| 14351 hsa-mir-3615 | U2AF1     | 0.42535245 mirna_pc  |
| 14352 hsa-mir-3615 | ZNF639    | 0.340723603 mirna_pc |
| 14353 hsa-mir-3615 | RPL38     | 0.326933322 mirna_pc |
| 14354 hsa-mir-3615 | MSTO1     | 0.327817464 mirna_pc |
| 14355 hsa-mir-3615 | ABT1      | 0.449075832 mirna_pc |
| 14356 hsa-mir-3615 | METAP1    | 0.3082616 mirna_pc   |
| 14357 hsa-mir-3615 | NOP16     | 0.330992117 mirna_pc |
| 14358 hsa-mir-3615 | MPHOSPH10 | 0.369918927 mirna_pc |
| 14359 hsa-mir-3615 | AKAP9     | 0.398699101 mirna_pc |
| 14360 hsa-mir-3615 | RPS7      | 0.352458593 mirna_pc |
| 14361 hsa-mir-3615 | MKRN3     | 0.34728214 mirna_pc  |
| 14362 hsa-mir-3615 | METAP2    | 0.322588348 mirna_pc |
| 14363 hsa-mir-3615 | TIMM16    | 0.332768921 mirna_pc |

|                    |            |                      |
|--------------------|------------|----------------------|
| 14364 hsa-mir-3615 | NUDCD2     | 0.329703335 mirna_pc |
| 14365 hsa-mir-3615 | NAT9       | 0.484086865 mirna_pc |
| 14366 hsa-mir-3615 | WDR77      | 0.360526316 mirna_pc |
| 14367 hsa-mir-3615 | C17orf95   | 0.304745558 mirna_pc |
| 14368 hsa-mir-3615 | NLE1       | 0.398611376 mirna_pc |
| 14369 hsa-mir-3615 | DMRTA2     | 0.304096098 mirna_pc |
| 14370 hsa-mir-3615 | BTG3       | 0.304255244 mirna_pc |
| 14371 hsa-mir-3615 | LOC645332  | 0.38933301 mirna_pc  |
| 14372 hsa-mir-3615 | MRPS22     | 0.341685962 mirna_pc |
| 14373 hsa-mir-3615 | PSPH       | 0.327455534 mirna_pc |
| 14374 hsa-mir-3615 | MGC72080   | 0.417135619 mirna_pc |
| 14375 hsa-mir-3615 | C13orf23   | 0.302891701 mirna_pc |
| 14376 hsa-mir-3615 | TRRAP      | 0.310632008 mirna_pc |
| 14377 hsa-mir-3615 | TRMT61B    | 0.41397649 mirna_pc  |
| 14378 hsa-mir-3615 | MPV17      | 0.334064729 mirna_pc |
| 14379 hsa-mir-3615 | KRT15      | 0.390133379 mirna_pc |
| 14380 hsa-mir-3615 | DCUN1D1    | 0.308296579 mirna_pc |
| 14381 hsa-mir-3615 | C1orf109   | 0.341573729 mirna_pc |
| 14382 hsa-mir-3615 | PCBP1      | 0.344022397 mirna_pc |
| 14383 hsa-mir-3615 | UBE2N      | 0.308151603 mirna_pc |
| 14384 hsa-mir-3615 | CHCHD2     | 0.309285663 mirna_pc |
| 14385 hsa-mir-3615 | PIGX       | 0.331784891 mirna_pc |
| 14386 hsa-mir-3615 | HTRA2      | 0.334546324 mirna_pc |
| 14387 hsa-mir-3615 | MTA3       | 0.358373008 mirna_pc |
| 14388 hsa-mir-3615 | CHAC2      | 0.325965316 mirna_pc |
| 14389 hsa-mir-3615 | ACN9       | 0.428482864 mirna_pc |
| 14390 hsa-mir-3615 | PSPC1      | 0.33102611 mirna_pc  |
| 14391 hsa-mir-3615 | INTU       | 0.40680831 mirna_pc  |
| 14392 hsa-mir-3615 | NHP2L1     | 0.320984072 mirna_pc |
| 14393 hsa-mir-3615 | MAPKAPK5   | 0.310005679 mirna_pc |
| 14394 hsa-mir-3615 | E2F6       | 0.378318231 mirna_pc |
| 14395 hsa-mir-3615 | DRG1       | 0.315226258 mirna_pc |
| 14396 hsa-mir-3615 | NOL7       | 0.436185282 mirna_pc |
| 14397 hsa-mir-3615 | PRPSAP2    | 0.303973676 mirna_pc |
| 14398 hsa-mir-3615 | CPSF4      | 0.498336172 mirna_pc |
| 14399 hsa-mir-3615 | GADD45GIP1 | 0.314740057 mirna_pc |
| 14400 hsa-mir-3615 | NT5C       | 0.377288283 mirna_pc |
| 14401 hsa-mir-3615 | CTU2       | 0.352497236 mirna_pc |
| 14402 hsa-mir-3615 | SLC4A1AP   | 0.36936926 mirna_pc  |
| 14403 hsa-mir-3615 | TTC27      | 0.402591475 mirna_pc |
| 14404 hsa-mir-3615 | DHRS13     | 0.382658949 mirna_pc |
| 14405 hsa-mir-3615 | MCCC1      | 0.315774167 mirna_pc |
| 14406 hsa-mir-3615 | MTIF2      | 0.364141072 mirna_pc |
| 14407 hsa-mir-3615 | KRTCAP3    | 0.305554123 mirna_pc |
| 14408 hsa-mir-3615 | LOC222699  | 0.411577761 mirna_pc |
| 14409 hsa-mir-3615 | DHX57      | 0.346973793 mirna_pc |
| 14410 hsa-mir-3615 | HIST1H1C   | 0.411680606 mirna_pc |
| 14411 hsa-mir-3615 | AAAS       | 0.358596945 mirna_pc |
| 14412 hsa-mir-3615 | FDXR       | 0.330795102 mirna_pc |
| 14413 hsa-mir-3615 | C2orf79    | 0.301405935 mirna_pc |
| 14414 hsa-mir-3615 | SUPT7L     | 0.330574361 mirna_pc |
| 14415 hsa-mir-3615 | PEMT       | 0.339357935 mirna_pc |
| 14416 hsa-mir-3615 | LIG3       | 0.349913593 mirna_pc |
| 14417 hsa-mir-3615 | MRPL30     | 0.318718443 mirna_pc |

|                    |          |                      |
|--------------------|----------|----------------------|
| 14418 hsa-mir-3615 | ZNF277   | 0.392008038 mirna_pc |
| 14419 hsa-mir-3615 | PELP1    | 0.300084181 mirna_pc |
| 14420 hsa-mir-3615 | DHODH    | 0.33502163 mirna_pc  |
| 14421 hsa-mir-3615 | C11orf45 | 0.380800542 mirna_pc |
| 14422 hsa-mir-3615 | SFRS7    | 0.441400429 mirna_pc |
| 14423 hsa-mir-3615 | GPR98    | 0.306736738 mirna_pc |
| 14424 hsa-mir-3615 | TRMT2A   | 0.370930795 mirna_pc |
| 14425 hsa-mir-3615 | IFRD1    | 0.347084181 mirna_pc |
| 14426 hsa-mir-3615 | UBE20    | 0.36435976 mirna_pc  |
| 14427 hsa-mir-3615 | INO80B   | 0.314796041 mirna_pc |
| 14428 hsa-mir-3615 | SARS2    | 0.312863313 mirna_pc |
| 14429 hsa-mir-3615 | RBM10    | 0.306649951 mirna_pc |
| 14430 hsa-mir-3615 | PDCD2    | 0.323096682 mirna_pc |
| 14431 hsa-mir-3615 | CORO1B   | 0.301418691 mirna_pc |
| 14432 hsa-mir-3615 | RPUSD2   | 0.362919291 mirna_pc |
| 14433 hsa-mir-3615 | THYN1    | 0.43170155 mirna_pc  |
| 14434 hsa-mir-3615 | AMZ2     | 0.346986497 mirna_pc |
| 14435 hsa-mir-3615 | PARL     | 0.300467086 mirna_pc |
| 14436 hsa-mir-3615 | C2orf68  | 0.423236876 mirna_pc |
| 14437 hsa-mir-3615 | ARPC1A   | 0.303447103 mirna_pc |
| 14438 hsa-mir-3615 | C17orf80 | 0.336146524 mirna_pc |
| 14439 hsa-mir-3615 | ANKRD23  | 0.302025802 mirna_pc |
| 14440 hsa-mir-3615 | C17orf75 | 0.423232862 mirna_pc |
| 14441 hsa-mir-3615 | ZBTB44   | 0.317717427 mirna_pc |
| 14442 hsa-mir-3615 | FBF1     | 0.333259352 mirna_pc |
| 14443 hsa-mir-3615 | SPRYD4   | 0.36435199 mirna_pc  |
| 14444 hsa-mir-3615 | ZNF789   | 0.313281825 mirna_pc |
| 14445 hsa-mir-3615 | EEF1E1   | 0.341017354 mirna_pc |
| 14446 hsa-mir-3615 | YTHDF2   | 0.30767442 mirna_pc  |
| 14447 hsa-mir-3615 | MRPL38   | 0.453943674 mirna_pc |
| 14448 hsa-mir-3615 | ATPBD4   | 0.344428188 mirna_pc |
| 14449 hsa-mir-3615 | ZKSCAN5  | 0.375587621 mirna_pc |
| 14450 hsa-mir-3615 | C12orf10 | 0.371542204 mirna_pc |
| 14451 hsa-mir-3615 | C12orf45 | 0.323970505 mirna_pc |
| 14452 hsa-mir-3615 | C2orf44  | 0.375371092 mirna_pc |
| 14453 hsa-mir-3615 | RING1    | 0.339926691 mirna_pc |
| 14454 hsa-mir-3615 | SEPHS1   | 0.308876376 mirna_pc |
| 14455 hsa-mir-3615 | PNKP     | 0.304482027 mirna_pc |
| 14456 hsa-mir-3615 | C8orf40  | 0.308161917 mirna_pc |
| 14457 hsa-mir-3615 | BOLA3    | 0.384365353 mirna_pc |
| 14458 hsa-mir-3615 | C19orf23 | 0.40861986 mirna_pc  |
| 14459 hsa-mir-3615 | MYL6B    | 0.386940221 mirna_pc |
| 14460 hsa-mir-3615 | PWP2     | 0.318478498 mirna_pc |
| 14461 hsa-mir-3615 | PDCD7    | 0.35245345 mirna_pc  |
| 14462 hsa-mir-3615 | C11orf71 | 0.318126724 mirna_pc |
| 14463 hsa-mir-3615 | PSMG4    | 0.306929051 mirna_pc |
| 14464 hsa-mir-3615 | FAM104A  | 0.309306365 mirna_pc |
| 14465 hsa-mir-3615 | MRPS15   | 0.331722009 mirna_pc |
| 14466 hsa-mir-3615 | C17orf58 | 0.321930363 mirna_pc |
| 14467 hsa-mir-3615 | NARS2    | 0.31624058 mirna_pc  |
| 14468 hsa-mir-3615 | LYRM4    | 0.399717694 mirna_pc |
| 14469 hsa-mir-3615 | FAM133B  | 0.423813882 mirna_pc |
| 14470 hsa-mir-3615 | BCL11A   | 0.422704703 mirna_pc |
| 14471 hsa-mir-3615 | UTP11L   | 0.311513718 mirna_pc |



|                    |           |                      |
|--------------------|-----------|----------------------|
| 14472 hsa-mir-3615 | TIMM8B    | 0.316165423 mirna_pc |
| 14473 hsa-mir-3615 | ANP32A    | 0.329478627 mirna_pc |
| 14474 hsa-mir-3615 | NUFIP1    | 0.374988739 mirna_pc |
| 14475 hsa-mir-3615 | CFDP1     | 0.302267208 mirna_pc |
| 14476 hsa-mir-3615 | HYLS1     | 0.313942354 mirna_pc |
| 14477 hsa-mir-3615 | LCMT2     | 0.314672447 mirna_pc |
| 14478 hsa-mir-3615 | SNF8      | 0.307827823 mirna_pc |
| 14479 hsa-mir-3615 | HNRNPA0   | 0.353725036 mirna_pc |
| 14480 hsa-mir-3615 | ZNF300    | 0.331942158 mirna_pc |
| 14481 hsa-mir-3615 | MORN2     | 0.366393004 mirna_pc |
| 14482 hsa-mir-3615 | MTERF     | 0.484865215 mirna_pc |
| 14483 hsa-mir-3615 | AFMID     | 0.300953786 mirna_pc |
| 14484 hsa-mir-3615 | ATP5H     | 0.356114768 mirna_pc |
| 14485 hsa-mir-3615 | C7orf64   | 0.317364896 mirna_pc |
| 14486 hsa-mir-3615 | SLC25A33  | 0.321819665 mirna_pc |
| 14487 hsa-mir-3615 | OST4      | 0.306299676 mirna_pc |
| 14488 hsa-mir-3615 | BCS1L     | 0.345031112 mirna_pc |
| 14489 hsa-mir-3615 | ZNF394    | 0.329263523 mirna_pc |
| 14490 hsa-mir-3615 | DDX51     | 0.393922021 mirna_pc |
| 14491 hsa-mir-3615 | WDR83     | 0.317303098 mirna_pc |
| 14492 hsa-mir-3615 | UTP3      | 0.303632567 mirna_pc |
| 14493 hsa-mir-3615 | GTF2H2    | 0.425324585 mirna_pc |
| 14494 hsa-mir-3615 | ZBTB39    | 0.310766641 mirna_pc |
| 14495 hsa-mir-3615 | RPAIN     | 0.326477916 mirna_pc |
| 14496 hsa-mir-3615 | CCDC90B   | 0.36990397 mirna_pc  |
| 14497 hsa-mir-3615 | API5      | 0.363635585 mirna_pc |
| 14498 hsa-mir-3615 | CIA01     | 0.307936905 mirna_pc |
| 14499 hsa-mir-3615 | C2orf3    | 0.339560954 mirna_pc |
| 14500 hsa-mir-3615 | THAP4     | 0.338905132 mirna_pc |
| 14501 hsa-mir-3615 | KRIT1     | 0.355778883 mirna_pc |
| 14502 hsa-mir-3615 | DHRS2     | 0.414472994 mirna_pc |
| 14503 hsa-mir-3615 | ACOT13    | 0.347327306 mirna_pc |
| 14504 hsa-mir-3615 | FGFBP3    | 0.333494324 mirna_pc |
| 14505 hsa-mir-3615 | RRP7B     | 0.329234627 mirna_pc |
| 14506 hsa-mir-3615 | DNAJC19   | 0.399591328 mirna_pc |
| 14507 hsa-mir-3615 | TMEM134   | 0.341317376 mirna_pc |
| 14508 hsa-mir-3615 | PEX1      | 0.335433636 mirna_pc |
| 14509 hsa-mir-3615 | DIS3L2    | 0.438410017 mirna_pc |
| 14510 hsa-mir-3615 | MRPL19    | 0.336665769 mirna_pc |
| 14511 hsa-mir-3615 | CETN3     | 0.374216132 mirna_pc |
| 14512 hsa-mir-3615 | CDK3      | 0.304627819 mirna_pc |
| 14513 hsa-mir-3615 | B9D1      | 0.390572222 mirna_pc |
| 14514 hsa-mir-3615 | LSM 1.00  | 0.403022365 mirna_pc |
| 14515 hsa-mir-3615 | DYNC1I1   | 0.3986548 mirna_pc   |
| 14516 hsa-mir-3615 | UTP15     | 0.329972813 mirna_pc |
| 14517 hsa-mir-3615 | AADAT     | 0.328766753 mirna_pc |
| 14518 hsa-mir-3615 | ACP1      | 0.330876699 mirna_pc |
| 14519 hsa-mir-3615 | ZNF322A   | 0.462345475 mirna_pc |
| 14520 hsa-mir-3615 | SERF1A    | 0.398907775 mirna_pc |
| 14521 hsa-mir-3615 | PRMT6     | 0.302991268 mirna_pc |
| 14522 hsa-mir-3615 | LOC401397 | 0.504761385 mirna_pc |
| 14523 hsa-mir-3615 | C21orf119 | 0.39764801 mirna_pc  |
| 14524 hsa-mir-3615 | PRPSAP1   | 0.314586588 mirna_pc |
| 14525 hsa-mir-3615 | C2orf28   | 0.350079097 mirna_pc |

|                    |          |                      |
|--------------------|----------|----------------------|
| 14526 hsa-mir-3615 | MRPL40   | 0.31909761 mirna_pc  |
| 14527 hsa-mir-3615 | AARSD1   | 0.389580079 mirna_pc |
| 14528 hsa-mir-3615 | TMEM14B  | 0.321539229 mirna_pc |
| 14529 hsa-mir-3615 | AGA      | 0.306117641 mirna_pc |
| 14530 hsa-mir-3615 | TMEM168  | 0.42577852 mirna_pc  |
| 14531 hsa-mir-3615 | MRPL53   | 0.428678979 mirna_pc |
| 14532 hsa-mir-3615 | DNMT3A   | 0.310566629 mirna_pc |
| 14533 hsa-mir-3615 | NDUFS8   | 0.374884383 mirna_pc |
| 14534 hsa-mir-3615 | C12orf73 | 0.330350936 mirna_pc |
| 14535 hsa-mir-3615 | NMRAL1   | 0.312662631 mirna_pc |
| 14536 hsa-mir-25   | MKI67    | 0.315825822 mirna_pc |
| 14537 hsa-mir-25   | TPX2     | 0.340559721 mirna_pc |
| 14538 hsa-mir-25   | CENPF    | 0.462508824 mirna_pc |
| 14539 hsa-mir-25   | RCC2     | 0.400135264 mirna_pc |
| 14540 hsa-mir-25   | HOXC9    | 0.365366052 mirna_pc |
| 14541 hsa-mir-25   | KIF11    | 0.419919488 mirna_pc |
| 14542 hsa-mir-25   | FOXMI    | 0.336634755 mirna_pc |
| 14543 hsa-mir-25   | CDC25C   | 0.310417907 mirna_pc |
| 14544 hsa-mir-25   | MYBL2    | 0.353825009 mirna_pc |
| 14545 hsa-mir-25   | UBE2C    | 0.339970268 mirna_pc |
| 14546 hsa-mir-25   | BUB1     | 0.325420811 mirna_pc |
| 14547 hsa-mir-25   | NUSAP1   | 0.360772014 mirna_pc |
| 14548 hsa-mir-25   | KIFC1    | 0.361385317 mirna_pc |
| 14549 hsa-mir-25   | BUB1B    | 0.361342198 mirna_pc |
| 14550 hsa-mir-25   | HDGF     | 0.388133295 mirna_pc |
| 14551 hsa-mir-25   | KIF18B   | 0.35009805 mirna_pc  |
| 14552 hsa-mir-25   | ASPM     | 0.370761589 mirna_pc |
| 14553 hsa-mir-25   | KIF2C    | 0.359258469 mirna_pc |
| 14554 hsa-mir-25   | FANCA    | 0.325406691 mirna_pc |
| 14555 hsa-mir-25   | NCAPG    | 0.353344695 mirna_pc |
| 14556 hsa-mir-25   | SGOL1    | 0.331762214 mirna_pc |
| 14557 hsa-mir-25   | CCNA2    | 0.478974818 mirna_pc |
| 14558 hsa-mir-25   | SPC25    | 0.376271338 mirna_pc |
| 14559 hsa-mir-25   | FANCI    | 0.400120826 mirna_pc |
| 14560 hsa-mir-25   | NEK2     | 0.445221692 mirna_pc |
| 14561 hsa-mir-25   | MND1     | 0.541344525 mirna_pc |
| 14562 hsa-mir-25   | KIF22    | 0.332428737 mirna_pc |
| 14563 hsa-mir-25   | NCAPH    | 0.383419368 mirna_pc |
| 14564 hsa-mir-25   | GTSE1    | 0.361851558 mirna_pc |
| 14565 hsa-mir-25   | KIF23    | 0.308042914 mirna_pc |
| 14566 hsa-mir-25   | RAD54L   | 0.515780931 mirna_pc |
| 14567 hsa-mir-25   | CENPA    | 0.381108938 mirna_pc |
| 14568 hsa-mir-25   | MAD2L1   | 0.528730117 mirna_pc |
| 14569 hsa-mir-25   | TIMELESS | 0.534836302 mirna_pc |
| 14570 hsa-mir-25   | LMNB1    | 0.377650083 mirna_pc |
| 14571 hsa-mir-25   | CDCA8    | 0.36633785 mirna_pc  |
| 14572 hsa-mir-25   | TROAP    | 0.436042623 mirna_pc |
| 14573 hsa-mir-25   | CDCA5    | 0.364168946 mirna_pc |
| 14574 hsa-mir-25   | TACC3    | 0.312144167 mirna_pc |
| 14575 hsa-mir-25   | XPO1     | 0.405239539 mirna_pc |
| 14576 hsa-mir-25   | CDC45    | 0.315002585 mirna_pc |
| 14577 hsa-mir-25   | STMN1    | 0.477442162 mirna_pc |
| 14578 hsa-mir-25   | EXO1     | 0.35764948 mirna_pc  |
| 14579 hsa-mir-25   | CDCA2    | 0.302861222 mirna_pc |

|                  |          |                      |
|------------------|----------|----------------------|
| 14580 hsa-mir-25 | UBE2T    | 0.309750253 mirna_pc |
| 14581 hsa-mir-25 | CKS1B    | 0.369596962 mirna_pc |
| 14582 hsa-mir-25 | TUBB     | 0.401704103 mirna_pc |
| 14583 hsa-mir-25 | MCM2     | 0.411452632 mirna_pc |
| 14584 hsa-mir-25 | ORC1L    | 0.378664677 mirna_pc |
| 14585 hsa-mir-25 | KNTC1    | 0.432913211 mirna_pc |
| 14586 hsa-mir-25 | CCNF     | 0.33563408 mirna_pc  |
| 14587 hsa-mir-25 | CCNB2    | 0.330101375 mirna_pc |
| 14588 hsa-mir-25 | NUF2     | 0.383366914 mirna_pc |
| 14589 hsa-mir-25 | SFRP1    | 0.57079772 mirna_pc  |
| 14590 hsa-mir-25 | PLK4     | 0.549613887 mirna_pc |
| 14591 hsa-mir-25 | FANCB    | 0.370728338 mirna_pc |
| 14592 hsa-mir-25 | KIF18A   | 0.395432176 mirna_pc |
| 14593 hsa-mir-25 | DEPDC1   | 0.4084805 mirna_pc   |
| 14594 hsa-mir-25 | KIF14    | 0.333208244 mirna_pc |
| 14595 hsa-mir-25 | HJURP    | 0.328890871 mirna_pc |
| 14596 hsa-mir-25 | RAD51    | 0.341556645 mirna_pc |
| 14597 hsa-mir-25 | BLM      | 0.421971606 mirna_pc |
| 14598 hsa-mir-25 | DNMT1    | 0.319014985 mirna_pc |
| 14599 hsa-mir-25 | PAICS    | 0.301510442 mirna_pc |
| 14600 hsa-mir-25 | CCDC150  | 0.365855689 mirna_pc |
| 14601 hsa-mir-25 | BIRC5    | 0.320804989 mirna_pc |
| 14602 hsa-mir-25 | LIG1     | 0.366996122 mirna_pc |
| 14603 hsa-mir-25 | DTL      | 0.556017145 mirna_pc |
| 14604 hsa-mir-25 | EME1     | 0.366353476 mirna_pc |
| 14605 hsa-mir-25 | CENPK    | 0.301398239 mirna_pc |
| 14606 hsa-mir-25 | AURKB    | 0.426299059 mirna_pc |
| 14607 hsa-mir-25 | GSG2     | 0.354583823 mirna_pc |
| 14608 hsa-mir-25 | MCM10    | 0.3862809 mirna_pc   |
| 14609 hsa-mir-25 | SGOL2    | 0.360880012 mirna_pc |
| 14610 hsa-mir-25 | POLQ     | 0.377239388 mirna_pc |
| 14611 hsa-mir-25 | KIF15    | 0.418704431 mirna_pc |
| 14612 hsa-mir-25 | CDCA3    | 0.41756799 mirna_pc  |
| 14613 hsa-mir-25 | C1orf112 | 0.453436828 mirna_pc |
| 14614 hsa-mir-25 | GINS1    | 0.30504724 mirna_pc  |
| 14615 hsa-mir-25 | FEN1     | 0.308951251 mirna_pc |
| 14616 hsa-mir-25 | TRAIP    | 0.318135459 mirna_pc |
| 14617 hsa-mir-25 | ORC6L    | 0.329258789 mirna_pc |
| 14618 hsa-mir-25 | C16orf59 | 0.432450795 mirna_pc |
| 14619 hsa-mir-25 | C17orf53 | 0.325680459 mirna_pc |
| 14620 hsa-mir-25 | NEIL3    | 0.475373296 mirna_pc |
| 14621 hsa-mir-25 | MCM7     | 0.710196168 mirna_pc |
| 14622 hsa-mir-25 | C12orf48 | 0.374515211 mirna_pc |
| 14623 hsa-mir-25 | HNRNPL   | 0.332135544 mirna_pc |
| 14624 hsa-mir-25 | SMC4     | 0.339301954 mirna_pc |
| 14625 hsa-mir-25 | ZWINT    | 0.341810236 mirna_pc |
| 14626 hsa-mir-25 | TUBA1B   | 0.324139507 mirna_pc |
| 14627 hsa-mir-25 | HELLS    | 0.341379788 mirna_pc |
| 14628 hsa-mir-25 | NCAPD2   | 0.409087396 mirna_pc |
| 14629 hsa-mir-25 | ILF2     | 0.323416672 mirna_pc |
| 14630 hsa-mir-25 | TCF3     | 0.303089593 mirna_pc |
| 14631 hsa-mir-25 | C6orf167 | 0.352717534 mirna_pc |
| 14632 hsa-mir-25 | BRCA1    | 0.348998376 mirna_pc |
| 14633 hsa-mir-25 | MCM5     | 0.328249881 mirna_pc |

|                  |          |                      |
|------------------|----------|----------------------|
| 14634 hsa-mir-25 | MCM6     | 0.437814313 mirna_pc |
| 14635 hsa-mir-25 | CDCA7    | 0.362829986 mirna_pc |
| 14636 hsa-mir-25 | EPR1     | 0.397078652 mirna_pc |
| 14637 hsa-mir-25 | KIAA1524 | 0.358081739 mirna_pc |
| 14638 hsa-mir-25 | BRIP1    | 0.380005467 mirna_pc |
| 14639 hsa-mir-25 | PIF1     | 0.328977372 mirna_pc |
| 14640 hsa-mir-25 | UCK2     | 0.389924059 mirna_pc |
| 14641 hsa-mir-25 | THOC4    | 0.303045705 mirna_pc |
| 14642 hsa-mir-25 | NFKBIL2  | 0.338289124 mirna_pc |
| 14643 hsa-mir-25 | C15orf42 | 0.449246815 mirna_pc |
| 14644 hsa-mir-25 | FAM60A   | 0.315974742 mirna_pc |
| 14645 hsa-mir-25 | FAM64A   | 0.359053833 mirna_pc |
| 14646 hsa-mir-25 | ATAD5    | 0.432473763 mirna_pc |
| 14647 hsa-mir-25 | E2F1     | 0.342272482 mirna_pc |
| 14648 hsa-mir-25 | SNRPA    | 0.345746468 mirna_pc |
| 14649 hsa-mir-25 | FUS      | 0.321526537 mirna_pc |
| 14650 hsa-mir-25 | U2AF2    | 0.316057809 mirna_pc |
| 14651 hsa-mir-25 | CHAF1A   | 0.330749847 mirna_pc |
| 14652 hsa-mir-25 | CENPO    | 0.568907455 mirna_pc |
| 14653 hsa-mir-25 | XRCC2    | 0.323373051 mirna_pc |
| 14654 hsa-mir-25 | GEN1     | 0.351712982 mirna_pc |
| 14655 hsa-mir-25 | NUDT1    | 0.304369397 mirna_pc |
| 14656 hsa-mir-25 | HMGB2    | 0.482098337 mirna_pc |
| 14657 hsa-mir-25 | GINS2    | 0.372184327 mirna_pc |
| 14658 hsa-mir-25 | DNA2     | 0.337695888 mirna_pc |
| 14659 hsa-mir-25 | E2F7     | 0.439616705 mirna_pc |
| 14660 hsa-mir-25 | MLF1IP   | 0.390534753 mirna_pc |
| 14661 hsa-mir-25 | C16orf75 | 0.368325327 mirna_pc |
| 14662 hsa-mir-25 | CAD      | 0.396240897 mirna_pc |
| 14663 hsa-mir-25 | CDK2     | 0.397674081 mirna_pc |
| 14664 hsa-mir-25 | CDK4     | 0.3849468 mirna_pc   |
| 14665 hsa-mir-25 | TMEM108  | 0.606549098 mirna_pc |
| 14666 hsa-mir-25 | CHTF18   | 0.323070366 mirna_pc |
| 14667 hsa-mir-25 | HNRNPR   | 0.30460043 mirna_pc  |
| 14668 hsa-mir-25 | PRIM1    | 0.315270818 mirna_pc |
| 14669 hsa-mir-25 | CENPH    | 0.35028527 mirna_pc  |
| 14670 hsa-mir-25 | DHX34    | 0.309890045 mirna_pc |
| 14671 hsa-mir-25 | MSH2     | 0.399501529 mirna_pc |
| 14672 hsa-mir-25 | SF3B3    | 0.435348244 mirna_pc |
| 14673 hsa-mir-25 | CDC7     | 0.389080764 mirna_pc |
| 14674 hsa-mir-25 | RFC4     | 0.402179886 mirna_pc |
| 14675 hsa-mir-25 | FBX05    | 0.431375394 mirna_pc |
| 14676 hsa-mir-25 | MDK      | 0.327975808 mirna_pc |
| 14677 hsa-mir-25 | DDX11    | 0.410957412 mirna_pc |
| 14678 hsa-mir-25 | CDC25A   | 0.371297252 mirna_pc |
| 14679 hsa-mir-25 | TOPBP1   | 0.349316153 mirna_pc |
| 14680 hsa-mir-25 | OTX1     | 0.300141125 mirna_pc |
| 14681 hsa-mir-25 | H2AFZ    | 0.388676079 mirna_pc |
| 14682 hsa-mir-25 | DDX12    | 0.511761347 mirna_pc |
| 14683 hsa-mir-25 | MCM8     | 0.432266974 mirna_pc |
| 14684 hsa-mir-25 | SNRPE    | 0.303825477 mirna_pc |
| 14685 hsa-mir-25 | MARCKSL1 | 0.363983398 mirna_pc |
| 14686 hsa-mir-25 | TFAP4    | 0.342027979 mirna_pc |
| 14687 hsa-mir-25 | PUS7     | 0.348225104 mirna_pc |

|                  |              |                      |
|------------------|--------------|----------------------|
| 14688 hsa-mir-25 | CBX8         | 0.310273739 mirna_pc |
| 14689 hsa-mir-25 | TMEM201      | 0.358186922 mirna_pc |
| 14690 hsa-mir-25 | SRRT         | 0.624063312 mirna_pc |
| 14691 hsa-mir-25 | PSRC1        | 0.536472435 mirna_pc |
| 14692 hsa-mir-25 | DBF4B        | 0.320534765 mirna_pc |
| 14693 hsa-mir-25 | POU2F1       | 0.324418263 mirna_pc |
| 14694 hsa-mir-25 | HNRNPM       | 0.340503901 mirna_pc |
| 14695 hsa-mir-25 | TMPO         | 0.406629875 mirna_pc |
| 14696 hsa-mir-25 | SSBP3        | 0.315453952 mirna_pc |
| 14697 hsa-mir-25 | SMPD4        | 0.348931647 mirna_pc |
| 14698 hsa-mir-25 | GPR19        | 0.386366701 mirna_pc |
| 14699 hsa-mir-25 | GABPB1       | 0.44330802 mirna_pc  |
| 14700 hsa-mir-25 | DHX9         | 0.379223856 mirna_pc |
| 14701 hsa-mir-25 | CCDC138      | 0.407079814 mirna_pc |
| 14702 hsa-mir-25 | LOC100128191 | 0.392422828 mirna_pc |
| 14703 hsa-mir-25 | HMG2         | 0.37398434 mirna_pc  |
| 14704 hsa-mir-25 | ETV4         | 0.416840385 mirna_pc |
| 14705 hsa-mir-25 | POLA2        | 0.315760621 mirna_pc |
| 14706 hsa-mir-25 | SFRS1        | 0.356302886 mirna_pc |
| 14707 hsa-mir-25 | SKP2         | 0.357352111 mirna_pc |
| 14708 hsa-mir-25 | SMARCD1      | 0.334886869 mirna_pc |
| 14709 hsa-mir-25 | ATXN2L       | 0.316215449 mirna_pc |
| 14710 hsa-mir-25 | C4orf46      | 0.526286032 mirna_pc |
| 14711 hsa-mir-25 | FZD2         | 0.319384403 mirna_pc |
| 14712 hsa-mir-25 | RFC5         | 0.331591421 mirna_pc |
| 14713 hsa-mir-25 | MAZ          | 0.353309052 mirna_pc |
| 14714 hsa-mir-25 | SSRP1        | 0.316733012 mirna_pc |
| 14715 hsa-mir-25 | POLR2D       | 0.436911312 mirna_pc |
| 14716 hsa-mir-25 | KHDRBS1      | 0.389666417 mirna_pc |
| 14717 hsa-mir-25 | TUB          | 0.309551707 mirna_pc |
| 14718 hsa-mir-25 | SPAST        | 0.353877644 mirna_pc |
| 14719 hsa-mir-25 | MTL 5.00     | 0.573273806 mirna_pc |
| 14720 hsa-mir-25 | PARP1        | 0.340600836 mirna_pc |
| 14721 hsa-mir-25 | DNAJC2       | 0.371246183 mirna_pc |
| 14722 hsa-mir-25 | C4orf21      | 0.458403164 mirna_pc |
| 14723 hsa-mir-25 | TMEM194A     | 0.523406975 mirna_pc |
| 14724 hsa-mir-25 | AP1S1        | 0.387178685 mirna_pc |
| 14725 hsa-mir-25 | SLC39A10     | 0.441646134 mirna_pc |
| 14726 hsa-mir-25 | SUV420H2     | 0.339865797 mirna_pc |
| 14727 hsa-mir-25 | ZNF695       | 0.374220079 mirna_pc |
| 14728 hsa-mir-25 | NEDD1        | 0.356094148 mirna_pc |
| 14729 hsa-mir-25 | HAUS6        | 0.321769363 mirna_pc |
| 14730 hsa-mir-25 | CEP135       | 0.357929252 mirna_pc |
| 14731 hsa-mir-25 | HNRNPU       | 0.335835982 mirna_pc |
| 14732 hsa-mir-25 | PSMC2        | 0.397897121 mirna_pc |
| 14733 hsa-mir-25 | NASP         | 0.41718667 mirna_pc  |
| 14734 hsa-mir-25 | BCL2         | 0.518806863 mirna_pc |
| 14735 hsa-mir-25 | PTMA         | 0.327700567 mirna_pc |
| 14736 hsa-mir-25 | ELK1         | 0.308210993 mirna_pc |
| 14737 hsa-mir-25 | C11orf84     | 0.353108391 mirna_pc |
| 14738 hsa-mir-25 | SLC12A9      | 0.401612975 mirna_pc |
| 14739 hsa-mir-25 | DCHS2        | 0.317794128 mirna_pc |
| 14740 hsa-mir-25 | SUV39H2      | 0.426206256 mirna_pc |
| 14741 hsa-mir-25 | GORAB        | 0.383192292 mirna_pc |

|                  |           |                      |
|------------------|-----------|----------------------|
| 14742 hsa-mir-25 | HNRNPD    | 0.417943958 mirna_pc |
| 14743 hsa-mir-25 | SHOX2     | 0.433746215 mirna_pc |
| 14744 hsa-mir-25 | HIFX      | 0.317280759 mirna_pc |
| 14745 hsa-mir-25 | RAD9A     | 0.33811719 mirna_pc  |
| 14746 hsa-mir-25 | ELAVL1    | 0.324729472 mirna_pc |
| 14747 hsa-mir-25 | KIAA0406  | 0.324946599 mirna_pc |
| 14748 hsa-mir-25 | PSMC3IP   | 0.330993304 mirna_pc |
| 14749 hsa-mir-25 | PMAIP1    | 0.353871397 mirna_pc |
| 14750 hsa-mir-25 | POP7      | 0.47236363 mirna_pc  |
| 14751 hsa-mir-25 | DHFR      | 0.343840152 mirna_pc |
| 14752 hsa-mir-25 | ILF3      | 0.373493348 mirna_pc |
| 14753 hsa-mir-25 | TAF6      | 0.531100012 mirna_pc |
| 14754 hsa-mir-25 | C1orf96   | 0.329432655 mirna_pc |
| 14755 hsa-mir-25 | EHMT2     | 0.432358975 mirna_pc |
| 14756 hsa-mir-25 | UBAP2L    | 0.344747836 mirna_pc |
| 14757 hsa-mir-25 | DEK       | 0.3466388 mirna_pc   |
| 14758 hsa-mir-25 | PLOD3     | 0.376793168 mirna_pc |
| 14759 hsa-mir-25 | PASK      | 0.407445877 mirna_pc |
| 14760 hsa-mir-25 | RPGRIP1L  | 0.310277244 mirna_pc |
| 14761 hsa-mir-25 | LRWD1     | 0.465442906 mirna_pc |
| 14762 hsa-mir-25 | HEATR2    | 0.401298723 mirna_pc |
| 14763 hsa-mir-25 | LSM 6.00  | 0.39986637 mirna_pc  |
| 14764 hsa-mir-25 | PRAME     | 0.365500924 mirna_pc |
| 14765 hsa-mir-25 | FBXW8     | 0.307659162 mirna_pc |
| 14766 hsa-mir-25 | FUBP1     | 0.338555363 mirna_pc |
| 14767 hsa-mir-25 | SUV39H1   | 0.377777314 mirna_pc |
| 14768 hsa-mir-25 | IPO9      | 0.405487566 mirna_pc |
| 14769 hsa-mir-25 | SART3     | 0.409044469 mirna_pc |
| 14770 hsa-mir-25 | TRA2B     | 0.457249237 mirna_pc |
| 14771 hsa-mir-25 | RSRC1     | 0.334705183 mirna_pc |
| 14772 hsa-mir-25 | TRAF4     | 0.348374998 mirna_pc |
| 14773 hsa-mir-25 | GAR1      | 0.353621997 mirna_pc |
| 14774 hsa-mir-25 | C7orf47   | 0.442171537 mirna_pc |
| 14775 hsa-mir-25 | CDRT4     | 0.492780193 mirna_pc |
| 14776 hsa-mir-25 | C3orf21   | 0.363467503 mirna_pc |
| 14777 hsa-mir-25 | CPXM1     | 0.325971252 mirna_pc |
| 14778 hsa-mir-25 | PMS2L1    | 0.418668045 mirna_pc |
| 14779 hsa-mir-25 | IGF2BP2   | 0.346513907 mirna_pc |
| 14780 hsa-mir-25 | WHSC1     | 0.39851748 mirna_pc  |
| 14781 hsa-mir-25 | ITGB3BP   | 0.371276712 mirna_pc |
| 14782 hsa-mir-25 | BCL2A1    | 0.335304837 mirna_pc |
| 14783 hsa-mir-25 | C4orf43   | 0.310238871 mirna_pc |
| 14784 hsa-mir-25 | SFPQ      | 0.369374637 mirna_pc |
| 14785 hsa-mir-25 | CD83      | 0.505727888 mirna_pc |
| 14786 hsa-mir-25 | FAM125B   | 0.444414089 mirna_pc |
| 14787 hsa-mir-25 | AS3MT     | 0.31461206 mirna_pc  |
| 14788 hsa-mir-25 | CADM1     | 0.405839939 mirna_pc |
| 14789 hsa-mir-25 | POLA1     | 0.354109159 mirna_pc |
| 14790 hsa-mir-25 | C10orf119 | 0.30113019 mirna_pc  |
| 14791 hsa-mir-25 | POGK      | 0.31047839 mirna_pc  |
| 14792 hsa-mir-25 | CPAMD8    | 0.431979291 mirna_pc |
| 14793 hsa-mir-25 | SALL2     | 0.347257602 mirna_pc |
| 14794 hsa-mir-25 | FAM86C    | 0.389490578 mirna_pc |
| 14795 hsa-mir-25 | MSH6      | 0.457513507 mirna_pc |

|                  |           |                      |
|------------------|-----------|----------------------|
| 14796 hsa-mir-25 | LEF1      | 0.507793855 mirna_pc |
| 14797 hsa-mir-25 | SMC3      | 0.309671802 mirna_pc |
| 14798 hsa-mir-25 | FLVCR1    | 0.316184432 mirna_pc |
| 14799 hsa-mir-25 | KREMEN2   | 0.501481929 mirna_pc |
| 14800 hsa-mir-25 | TRIP6     | 0.384608242 mirna_pc |
| 14801 hsa-mir-25 | MEX3A     | 0.694160664 mirna_pc |
| 14802 hsa-mir-25 | MOGS      | 0.306576293 mirna_pc |
| 14803 hsa-mir-25 | IRAK1BP1  | 0.328592611 mirna_pc |
| 14804 hsa-mir-25 | TAF5      | 0.376979592 mirna_pc |
| 14805 hsa-mir-25 | FANCC     | 0.384490631 mirna_pc |
| 14806 hsa-mir-25 | TIFA      | 0.439911728 mirna_pc |
| 14807 hsa-mir-25 | CCDC28B   | 0.361325033 mirna_pc |
| 14808 hsa-mir-25 | UNC119B   | 0.378270901 mirna_pc |
| 14809 hsa-mir-25 | HNRNPA1L2 | 0.330271843 mirna_pc |
| 14810 hsa-mir-25 | PPFIA1    | 0.347960114 mirna_pc |
| 14811 hsa-mir-25 | EMILIN3   | 0.345224011 mirna_pc |
| 14812 hsa-mir-25 | ZBTB12    | 0.435785713 mirna_pc |
| 14813 hsa-mir-25 | MCTP2     | 0.521988543 mirna_pc |
| 14814 hsa-mir-25 | LOC642846 | 0.478275341 mirna_pc |
| 14815 hsa-mir-25 | TGIF2     | 0.539740016 mirna_pc |
| 14816 hsa-mir-25 | SENP1     | 0.371457752 mirna_pc |
| 14817 hsa-mir-25 | RCN2      | 0.397736374 mirna_pc |
| 14818 hsa-mir-25 | MTF2      | 0.366680316 mirna_pc |
| 14819 hsa-mir-25 | ETV6      | 0.304797255 mirna_pc |
| 14820 hsa-mir-25 | PXDN      | 0.345928255 mirna_pc |
| 14821 hsa-mir-25 | POLE      | 0.540514825 mirna_pc |
| 14822 hsa-mir-25 | MUTYH     | 0.321080373 mirna_pc |
| 14823 hsa-mir-25 | RBM14     | 0.356164137 mirna_pc |
| 14824 hsa-mir-25 | EXOSC9    | 0.349073895 mirna_pc |
| 14825 hsa-mir-25 | RBMX      | 0.416248899 mirna_pc |
| 14826 hsa-mir-25 | ORC5L     | 0.524718952 mirna_pc |
| 14827 hsa-mir-25 | MDC 1.00  | 0.419230583 mirna_pc |
| 14828 hsa-mir-25 | CTCF      | 0.384646218 mirna_pc |
| 14829 hsa-mir-25 | RPL39L    | 0.419651624 mirna_pc |
| 14830 hsa-mir-25 | EPHB4     | 0.639469899 mirna_pc |
| 14831 hsa-mir-25 | IGSF9     | 0.521314735 mirna_pc |
| 14832 hsa-mir-25 | DNAJC14   | 0.325278542 mirna_pc |
| 14833 hsa-mir-25 | FIP1L1    | 0.3248551 mirna_pc   |
| 14834 hsa-mir-25 | ZNF519    | 0.352666088 mirna_pc |
| 14835 hsa-mir-25 | CIT       | 0.377249606 mirna_pc |
| 14836 hsa-mir-25 | KDM2B     | 0.391885158 mirna_pc |
| 14837 hsa-mir-25 | UFSP1     | 0.366900766 mirna_pc |
| 14838 hsa-mir-25 | VWA2      | 0.338796703 mirna_pc |
| 14839 hsa-mir-25 | NKD2      | 0.329160088 mirna_pc |
| 14840 hsa-mir-25 | FRMD4A    | 0.470322162 mirna_pc |
| 14841 hsa-mir-25 | MYB       | 0.501964781 mirna_pc |
| 14842 hsa-mir-25 | ITPRIPL1  | 0.462222269 mirna_pc |
| 14843 hsa-mir-25 | TTLL4     | 0.362678356 mirna_pc |
| 14844 hsa-mir-25 | C20orf177 | 0.338616113 mirna_pc |
| 14845 hsa-mir-25 | EMILIN1   | 0.305261728 mirna_pc |
| 14846 hsa-mir-25 | ATXN7L2   | 0.357600599 mirna_pc |
| 14847 hsa-mir-25 | ACBD7     | 0.319692398 mirna_pc |
| 14848 hsa-mir-25 | POTEF     | 0.320367321 mirna_pc |
| 14849 hsa-mir-25 | ATN1      | 0.318087816 mirna_pc |

|                  |           |                      |
|------------------|-----------|----------------------|
| 14850 hsa-mir-25 | ANKRD6    | 0.450589222 mirna_pc |
| 14851 hsa-mir-25 | BCL7A     | 0.414259454 mirna_pc |
| 14852 hsa-mir-25 | TRPA1     | 0.54221849 mirna_pc  |
| 14853 hsa-mir-25 | PALM2     | 0.303925767 mirna_pc |
| 14854 hsa-mir-25 | ARNT2     | 0.387233319 mirna_pc |
| 14855 hsa-mir-25 | ARHGAP19  | 0.3863653 mirna_pc   |
| 14856 hsa-mir-25 | ZNF286A   | 0.535098184 mirna_pc |
| 14857 hsa-mir-25 | SPDYE3    | 0.365956239 mirna_pc |
| 14858 hsa-mir-25 | MRPL21    | 0.538803449 mirna_pc |
| 14859 hsa-mir-25 | DMRTA2    | 0.349029199 mirna_pc |
| 14860 hsa-mir-25 | ZNF84     | 0.302347304 mirna_pc |
| 14861 hsa-mir-25 | PRR3      | 0.327447511 mirna_pc |
| 14862 hsa-mir-25 | TRIM4     | 0.330305711 mirna_pc |
| 14863 hsa-mir-25 | CNTROB    | 0.333527897 mirna_pc |
| 14864 hsa-mir-25 | TRRAP     | 0.526401508 mirna_pc |
| 14865 hsa-mir-25 | ORAI2     | 0.451819894 mirna_pc |
| 14866 hsa-mir-25 | MMP25     | 0.30380801 mirna_pc  |
| 14867 hsa-mir-25 | SEMA4F    | 0.408632585 mirna_pc |
| 14868 hsa-mir-25 | SLC25A13  | 0.35388318 mirna_pc  |
| 14869 hsa-mir-25 | ZNF286B   | 0.41852184 mirna_pc  |
| 14870 hsa-mir-25 | DDX20     | 0.351140344 mirna_pc |
| 14871 hsa-mir-25 | INPPL1    | 0.491957681 mirna_pc |
| 14872 hsa-mir-25 | SEC61A2   | 0.343081073 mirna_pc |
| 14873 hsa-mir-25 | GPR3      | 0.421731811 mirna_pc |
| 14874 hsa-mir-25 | E2F6      | 0.362249541 mirna_pc |
| 14875 hsa-mir-25 | HUNK      | 0.3137111 mirna_pc   |
| 14876 hsa-mir-25 | PILRB     | 0.475080541 mirna_pc |
| 14877 hsa-mir-25 | SFRS13A   | 0.32421942 mirna_pc  |
| 14878 hsa-mir-25 | GNB2      | 0.32641279 mirna_pc  |
| 14879 hsa-mir-25 | SCLY      | 0.590512561 mirna_pc |
| 14880 hsa-mir-25 | GPR125    | 0.416345398 mirna_pc |
| 14881 hsa-mir-25 | FIZ1      | 0.322412697 mirna_pc |
| 14882 hsa-mir-25 | LDLRAD3   | 0.441266102 mirna_pc |
| 14883 hsa-mir-25 | COPS6     | 0.424444716 mirna_pc |
| 14884 hsa-mir-25 | GSTCD     | 0.341598685 mirna_pc |
| 14885 hsa-mir-25 | DHRS13    | 0.406550435 mirna_pc |
| 14886 hsa-mir-25 | RTTN      | 0.316588775 mirna_pc |
| 14887 hsa-mir-25 | SMC1A     | 0.332654753 mirna_pc |
| 14888 hsa-mir-25 | DHX57     | 0.403967695 mirna_pc |
| 14889 hsa-mir-25 | TSC22D4   | 0.327889595 mirna_pc |
| 14890 hsa-mir-25 | NUMA1     | 0.459920935 mirna_pc |
| 14891 hsa-mir-25 | ALX3      | 0.575121891 mirna_pc |
| 14892 hsa-mir-25 | ACVR2B    | 0.412199394 mirna_pc |
| 14893 hsa-mir-25 | SFT2D3    | 0.360552863 mirna_pc |
| 14894 hsa-mir-25 | LIG3      | 0.30669093 mirna_pc  |
| 14895 hsa-mir-25 | DPY19L2P2 | 0.329684708 mirna_pc |
| 14896 hsa-mir-25 | POLR2J    | 0.420968577 mirna_pc |
| 14897 hsa-mir-25 | ZKSCAN1   | 0.304188112 mirna_pc |
| 14898 hsa-mir-25 | CNPY4     | 0.304222272 mirna_pc |
| 14899 hsa-mir-25 | SFRS7     | 0.347327926 mirna_pc |
| 14900 hsa-mir-25 | ALKBH4    | 0.472995252 mirna_pc |
| 14901 hsa-mir-25 | PFAS      | 0.341595093 mirna_pc |
| 14902 hsa-mir-25 | LRTOMT    | 0.482608095 mirna_pc |
| 14903 hsa-mir-25 | ARMC10    | 0.406584793 mirna_pc |



|                  |          |                            |
|------------------|----------|----------------------------|
| 14904 hsa-mir-25 | RBM10    | 0.319877552 mirna_pc       |
| 14905 hsa-mir-25 | BAT2     | 0.346673377 mirna_pc       |
| 14906 hsa-mir-25 | EDAR     | 0.390216251 mirna_pc       |
| 14907 hsa-mir-25 | IFT81    | 0.332615364 mirna_pc       |
| 14908 hsa-mir-25 | ORAOV1   | 0.390599757 mirna_pc       |
| 14909 hsa-mir-25 | ZNF184   | 0.345891624 mirna_pc       |
| 14910 hsa-mir-25 | NUP153   | 0.341619332 mirna_pc       |
| 14911 hsa-mir-25 | WEE1     | 0.30119151 mirna_pc        |
| 14912 hsa-mir-25 | ARHGEF19 | 0.360228061 mirna_pc       |
| 14913 hsa-mir-25 | C17orf75 | 0.333049356 mirna_pc       |
| 14914 hsa-mir-25 | THAP5    | 0.391627922 mirna_pc       |
| 14915 hsa-mir-25 | CCND1    | 0.381338078 mirna_pc       |
| 14916 hsa-mir-25 | NFATC3   | 0.327295322 mirna_pc       |
| 14917 hsa-mir-25 | HCFC1    | 0.337546377 mirna_pc       |
| 14918 hsa-mir-25 | ZNF771   | 0.394918362 mirna_pc       |
| 14919 hsa-mir-25 |          | 3-Sep 0.305666721 mirna_pc |
| 14920 hsa-mir-25 | TCTN2    | 0.532606321 mirna_pc       |
| 14921 hsa-mir-25 | BCAN     | 0.41791726 mirna_pc        |
| 14922 hsa-mir-25 | ZNF669   | 0.308263235 mirna_pc       |
| 14923 hsa-mir-25 | LRP6     | 0.360418462 mirna_pc       |
| 14924 hsa-mir-25 | EXTL2    | 0.300796785 mirna_pc       |
| 14925 hsa-mir-25 | DCP2     | 0.332474121 mirna_pc       |
| 14926 hsa-mir-25 | PRKD3    | 0.420918261 mirna_pc       |
| 14927 hsa-mir-25 | C2orf44  | 0.419506702 mirna_pc       |
| 14928 hsa-mir-25 | SEPHS1   | 0.473092197 mirna_pc       |
| 14929 hsa-mir-25 | SHISA2   | 0.519208668 mirna_pc       |
| 14930 hsa-mir-25 | CBX5     | 0.454164937 mirna_pc       |
| 14931 hsa-mir-25 | RYK      | 0.320990197 mirna_pc       |
| 14932 hsa-mir-25 | ADNP     | 0.327364069 mirna_pc       |
| 14933 hsa-mir-25 | IFT172   | 0.328619231 mirna_pc       |
| 14934 hsa-mir-25 | TTC30B   | 0.381513694 mirna_pc       |
| 14935 hsa-mir-25 | MSL2     | 0.335109832 mirna_pc       |
| 14936 hsa-mir-25 | AGBL5    | 0.538417759 mirna_pc       |
| 14937 hsa-mir-25 | VASH2    | 0.493443449 mirna_pc       |
| 14938 hsa-mir-25 | NAV2     | 0.339338628 mirna_pc       |
| 14939 hsa-mir-25 | MYL6B    | 0.432604011 mirna_pc       |
| 14940 hsa-mir-25 | IRF2BP2  | 0.31745048 mirna_pc        |
| 14941 hsa-mir-25 | ZNF498   | 0.535987785 mirna_pc       |
| 14942 hsa-mir-25 | CD200    | 0.508100146 mirna_pc       |
| 14943 hsa-mir-25 | RABL5    | 0.521203736 mirna_pc       |
| 14944 hsa-mir-25 | HNRNPUL1 | 0.31797849 mirna_pc        |
| 14945 hsa-mir-25 | CHST11   | 0.399584792 mirna_pc       |
| 14946 hsa-mir-25 | BCL11A   | 0.470441524 mirna_pc       |
| 14947 hsa-mir-25 | C4orf27  | 0.314476836 mirna_pc       |
| 14948 hsa-mir-25 | ZNF512   | 0.346650177 mirna_pc       |
| 14949 hsa-mir-25 | PMPCB    | 0.379730839 mirna_pc       |
| 14950 hsa-mir-25 | ZNF473   | 0.366191993 mirna_pc       |
| 14951 hsa-mir-25 | COPS7B   | 0.323598133 mirna_pc       |
| 14952 hsa-mir-25 | USP21    | 0.440088636 mirna_pc       |
| 14953 hsa-mir-25 | ALMS1    | 0.417343502 mirna_pc       |
| 14954 hsa-mir-25 | C7orf43  | 0.340357906 mirna_pc       |
| 14955 hsa-mir-25 | TRAF3IP3 | 0.33850928 mirna_pc        |
| 14956 hsa-mir-25 | DCLRE1A  | 0.318070187 mirna_pc       |
| 14957 hsa-mir-25 | ANP32A   | 0.398036654 mirna_pc       |

|                  |          |                      |
|------------------|----------|----------------------|
| 14958 hsa-mir-25 | RNF121   | 0.423603938 mirna_pc |
| 14959 hsa-mir-25 | CPT1A    | 0.361766569 mirna_pc |
| 14960 hsa-mir-25 | ZMYM4    | 0.338983029 mirna_pc |
| 14961 hsa-mir-25 | AP4M1    | 0.551919837 mirna_pc |
| 14962 hsa-mir-25 | LMAN2L   | 0.309328725 mirna_pc |
| 14963 hsa-mir-25 | TCF7L1   | 0.401807498 mirna_pc |
| 14964 hsa-mir-25 | C17orf81 | 0.318938955 mirna_pc |
| 14965 hsa-mir-25 | THAP9    | 0.305695142 mirna_pc |
| 14966 hsa-mir-25 | HNRNPH3  | 0.328136302 mirna_pc |
| 14967 hsa-mir-25 | NAP1L1   | 0.310979015 mirna_pc |
| 14968 hsa-mir-25 | RABL2A   | 0.358493517 mirna_pc |
| 14969 hsa-mir-25 | NSL1     | 0.354324397 mirna_pc |
| 14970 hsa-mir-25 | CNIH2    | 0.326195271 mirna_pc |
| 14971 hsa-mir-25 | LRCH4    | 0.328149112 mirna_pc |
| 14972 hsa-mir-25 | TRDMT1   | 0.329189069 mirna_pc |
| 14973 hsa-mir-25 | ZNHIT1   | 0.347128098 mirna_pc |
| 14974 hsa-mir-25 | IQQC     | 0.355750789 mirna_pc |
| 14975 hsa-mir-25 | GATAD2B  | 0.308528593 mirna_pc |
| 14976 hsa-mir-25 | ALG10B   | 0.326975852 mirna_pc |
| 14977 hsa-mir-25 | ZSCAN21  | 0.50121224 mirna_pc  |
| 14978 hsa-mir-25 | C11orf59 | 0.409540355 mirna_pc |
| 14979 hsa-mir-25 | GATS     | 0.349061247 mirna_pc |
| 14980 hsa-mir-25 | PKP4     | 0.301813522 mirna_pc |
| 14981 hsa-mir-25 | PEG10    | 0.398253326 mirna_pc |
| 14982 hsa-mir-25 | CCNJ     | 0.340274261 mirna_pc |
| 14983 hsa-mir-25 | MYCN     | 0.612656308 mirna_pc |
| 14984 hsa-mir-25 | IFT122   | 0.319197425 mirna_pc |
| 14985 hsa-mir-25 | EFCAB7   | 0.307616692 mirna_pc |
| 14986 hsa-mir-25 | DCAF16   | 0.392205119 mirna_pc |
| 14987 hsa-mir-25 | SBK1     | 0.494572815 mirna_pc |
| 14988 hsa-mir-25 | PABPC4L  | 0.546856583 mirna_pc |
| 14989 hsa-mir-25 | FAM171A1 | 0.317819938 mirna_pc |
| 14990 hsa-mir-25 | THNSL1   | 0.306847981 mirna_pc |
| 14991 hsa-mir-25 | USP13    | 0.450338357 mirna_pc |
| 14992 hsa-mir-25 | RASL10B  | 0.301290313 mirna_pc |
| 14993 hsa-mir-25 | ZNF3     | 0.631126229 mirna_pc |
| 14994 hsa-mir-25 | CD69     | 0.541903123 mirna_pc |
| 14995 hsa-mir-25 | DNM1P35  | 0.34694073 mirna_pc  |
| 14996 hsa-mir-25 | MLL5     | 0.302148063 mirna_pc |
| 14997 hsa-mir-25 | ERLIN1   | 0.328133557 mirna_pc |
| 14998 hsa-mir-25 | C16orf46 | 0.368117544 mirna_pc |
| 14999 hsa-mir-25 | MSI1     | 0.440271871 mirna_pc |
| 15000 hsa-mir-25 | CLPB     | 0.376790962 mirna_pc |
| 15001 hsa-mir-25 | SERTAD4  | 0.355175165 mirna_pc |
| 15002 hsa-mir-25 | SCAI     | 0.359349514 mirna_pc |
| 15003 hsa-mir-25 | LMTK2    | 0.301029689 mirna_pc |
| 15004 hsa-mir-25 | GXYLT1   | 0.308446419 mirna_pc |
| 15005 hsa-mir-25 | N4BP2    | 0.301287292 mirna_pc |
| 15006 hsa-mir-25 | ZNF740   | 0.372652726 mirna_pc |
| 15007 hsa-mir-25 | EP400    | 0.325714566 mirna_pc |
| 15008 hsa-mir-25 | TRO      | 0.356585047 mirna_pc |
| 15009 hsa-mir-25 | PACRGL   | 0.342266326 mirna_pc |
| 15010 hsa-mir-25 | PBX2     | 0.306298485 mirna_pc |
| 15011 hsa-mir-25 | ZNF232   | 0.505363843 mirna_pc |

|                  |          |                      |
|------------------|----------|----------------------|
| 15012 hsa-mir-25 | ZBTB39   | 0.549707051 mirna_pc |
| 15013 hsa-mir-25 | NRCAM    | 0.354734841 mirna_pc |
| 15014 hsa-mir-25 | C20orf12 | 0.336836177 mirna_pc |
| 15015 hsa-mir-25 | FANCF    | 0.349272115 mirna_pc |
| 15016 hsa-mir-25 | VPS54    | 0.349740329 mirna_pc |
| 15017 hsa-mir-25 | RBBP4    | 0.37069106 mirna_pc  |
| 15018 hsa-mir-25 | NCOA5    | 0.32852008 mirna_pc  |
| 15019 hsa-mir-25 | CDKN1B   | 0.324029534 mirna_pc |
| 15020 hsa-mir-25 | ZNF618   | 0.427055785 mirna_pc |
| 15021 hsa-mir-25 | BRSK1    | 0.31363491 mirna_pc  |
| 15022 hsa-mir-25 | CCDC111  | 0.320396813 mirna_pc |
| 15023 hsa-mir-25 | ZNF713   | 0.307149936 mirna_pc |
| 15024 hsa-mir-25 | GIGYF1   | 0.545547805 mirna_pc |
| 15025 hsa-mir-25 | RRP7B    | 0.302279735 mirna_pc |
| 15026 hsa-mir-25 | LRDD     | 0.383769287 mirna_pc |
| 15027 hsa-mir-25 | CCDC157  | 0.480862747 mirna_pc |
| 15028 hsa-mir-25 | PDGFA    | 0.425234342 mirna_pc |
| 15029 hsa-mir-25 | SCML2    | 0.452028253 mirna_pc |
| 15030 hsa-mir-25 | ZNF594   | 0.309039041 mirna_pc |
| 15031 hsa-mir-25 | MEPCE    | 0.56115149 mirna_pc  |
| 15032 hsa-mir-25 | ZCCHC3   | 0.355275309 mirna_pc |
| 15033 hsa-mir-25 | RRP15    | 0.317373312 mirna_pc |
| 15034 hsa-mir-25 | COL9A2   | 0.316957919 mirna_pc |
| 15035 hsa-mir-25 | MSTO2P   | 0.308389415 mirna_pc |
| 15036 hsa-mir-25 | ETV5     | 0.624353029 mirna_pc |
| 15037 hsa-mir-25 | DACT2    | 0.352238377 mirna_pc |
| 15038 hsa-mir-25 | NUCKS1   | 0.318358711 mirna_pc |
| 15039 hsa-mir-25 | AADAT    | 0.435638797 mirna_pc |
| 15040 hsa-mir-25 | CBLL1    | 0.373568991 mirna_pc |
| 15041 hsa-mir-25 | IGHMBP2  | 0.590503712 mirna_pc |
| 15042 hsa-mir-25 | ABTB2    | 0.338665943 mirna_pc |
| 15043 hsa-mir-25 | C11orf51 | 0.431757413 mirna_pc |
| 15044 hsa-mir-25 | DNAL4    | 0.303489238 mirna_pc |
| 15045 hsa-mir-25 | FZD1     | 0.430781644 mirna_pc |
| 15046 hsa-mir-25 | B4GALNT4 | 0.398106212 mirna_pc |
| 15047 hsa-mir-25 | PRMT6    | 0.343841635 mirna_pc |
| 15048 hsa-mir-25 | HSDL1    | 0.32905798 mirna_pc  |
| 15049 hsa-mir-25 | PRKRIP1  | 0.424545413 mirna_pc |
| 15050 hsa-mir-25 | PDE4B    | 0.364096173 mirna_pc |
| 15051 hsa-mir-25 | C7orf59  | 0.371770432 mirna_pc |
| 15052 hsa-mir-25 | H2AFY2   | 0.345367002 mirna_pc |
| 15053 hsa-mir-25 | MBD6     | 0.36268246 mirna_pc  |
| 15054 hsa-mir-25 | TRIL     | 0.425326869 mirna_pc |
| 15055 hsa-mir-25 | KLHL23   | 0.305692171 mirna_pc |
| 15056 hsa-mir-25 | PCDH18   | 0.392787514 mirna_pc |
| 15057 hsa-mir-25 | SMARCAD1 | 0.374953676 mirna_pc |
| 15058 hsa-mir-25 | SCHIP1   | 0.321976219 mirna_pc |
| 15059 hsa-mir-25 | VPS37D   | 0.301883606 mirna_pc |
| 15060 hsa-mir-25 | SV2A     | 0.33158148 mirna_pc  |
| 15061 hsa-mir-25 | EFNB3    | 0.368958163 mirna_pc |
| 15062 hsa-mir-25 | CENPV    | 0.326979469 mirna_pc |
| 15063 hsa-mir-25 | DNMT3A   | 0.584275342 mirna_pc |
| 15064 hsa-mir-25 | CKAP4    | 0.309004006 mirna_pc |
| 15065 hsa-mir-25 | TET1     | 0.442258767 mirna_pc |

|                   |           |                      |
|-------------------|-----------|----------------------|
| 15066 hsa-mir-25  | PRTFDC1   | 0.301848794 mirna_pc |
| 15067 hsa-mir-25  | FAM200A   | 0.438979652 mirna_pc |
| 15068 hsa-mir-25  | MOSPD3    | 0.349654739 mirna_pc |
| 15069 hsa-mir-25  | ZNF711    | 0.320865777 mirna_pc |
| 15070 hsa-mir-25  | TRIM56    | 0.315547583 mirna_pc |
| 15071 hsa-mir-25  | POM121    | 0.300808424 mirna_pc |
| 15072 hsa-mir-15a | MKI67     | 0.31545403 mirna_pc  |
| 15073 hsa-mir-15a | BUB1      | 0.313411748 mirna_pc |
| 15074 hsa-mir-15a | KIFC1     | 0.309663904 mirna_pc |
| 15075 hsa-mir-15a | CKAP2     | 0.442786403 mirna_pc |
| 15076 hsa-mir-15a | FANCA     | 0.395732876 mirna_pc |
| 15077 hsa-mir-15a | SGOL1     | 0.378452785 mirna_pc |
| 15078 hsa-mir-15a | ARHGAP11A | 0.337241451 mirna_pc |
| 15079 hsa-mir-15a | CCNA2     | 0.303186357 mirna_pc |
| 15080 hsa-mir-15a | CBX3      | 0.38134324 mirna_pc  |
| 15081 hsa-mir-15a | SPC25     | 0.367491691 mirna_pc |
| 15082 hsa-mir-15a | NUP62     | 0.331533483 mirna_pc |
| 15083 hsa-mir-15a | NEK2      | 0.300438683 mirna_pc |
| 15084 hsa-mir-15a | GTSE1     | 0.369812155 mirna_pc |
| 15085 hsa-mir-15a | MAD2L1    | 0.320417551 mirna_pc |
| 15086 hsa-mir-15a | LMNB1     | 0.35242167 mirna_pc  |
| 15087 hsa-mir-15a | ASF1B     | 0.313471756 mirna_pc |
| 15088 hsa-mir-15a | XPO1      | 0.315929827 mirna_pc |
| 15089 hsa-mir-15a | CCNF      | 0.301135932 mirna_pc |
| 15090 hsa-mir-15a | NUF2      | 0.345153344 mirna_pc |
| 15091 hsa-mir-15a | PLK4      | 0.315771572 mirna_pc |
| 15092 hsa-mir-15a | SKA3      | 0.445679486 mirna_pc |
| 15093 hsa-mir-15a | HJURP     | 0.350707428 mirna_pc |
| 15094 hsa-mir-15a | BLM       | 0.320271772 mirna_pc |
| 15095 hsa-mir-15a | CCDC150   | 0.331564388 mirna_pc |
| 15096 hsa-mir-15a | LIG1      | 0.305901666 mirna_pc |
| 15097 hsa-mir-15a | EME1      | 0.315420876 mirna_pc |
| 15098 hsa-mir-15a | CENPK     | 0.386512901 mirna_pc |
| 15099 hsa-mir-15a | SGOL2     | 0.347222801 mirna_pc |
| 15100 hsa-mir-15a | CENPE     | 0.345022122 mirna_pc |
| 15101 hsa-mir-15a | Clorf112  | 0.342775207 mirna_pc |
| 15102 hsa-mir-15a | GINS1     | 0.401108957 mirna_pc |
| 15103 hsa-mir-15a | TRAIP     | 0.315429818 mirna_pc |
| 15104 hsa-mir-15a | EZH2      | 0.32584098 mirna_pc  |
| 15105 hsa-mir-15a | HELLS     | 0.336536885 mirna_pc |
| 15106 hsa-mir-15a | BRCA1     | 0.33816716 mirna_pc  |
| 15107 hsa-mir-15a | HNRNPA2B1 | 0.39438443 mirna_pc  |
| 15108 hsa-mir-15a | MCM6      | 0.363016286 mirna_pc |
| 15109 hsa-mir-15a | PIF1      | 0.361540994 mirna_pc |
| 15110 hsa-mir-15a | SFRS2     | 0.335566455 mirna_pc |
| 15111 hsa-mir-15a | ATAD5     | 0.331422114 mirna_pc |
| 15112 hsa-mir-15a | FAM111B   | 0.314197025 mirna_pc |
| 15113 hsa-mir-15a | ATAD2     | 0.367260322 mirna_pc |
| 15114 hsa-mir-15a | RFC3      | 0.459495689 mirna_pc |
| 15115 hsa-mir-15a | DEPDC1B   | 0.309172662 mirna_pc |
| 15116 hsa-mir-15a | HOXA11    | 0.325232119 mirna_pc |
| 15117 hsa-mir-15a | ANP32E    | 0.322582727 mirna_pc |
| 15118 hsa-mir-15a | BRCA2     | 0.455786548 mirna_pc |
| 15119 hsa-mir-15a | GEN1      | 0.459947349 mirna_pc |

|                   |           |                      |
|-------------------|-----------|----------------------|
| 15120 hsa-mir-15a | HMGB2     | 0.382293347 mirna_pc |
| 15121 hsa-mir-15a | DNA2      | 0.322217787 mirna_pc |
| 15122 hsa-mir-15a | NOP56     | 0.34394453 mirna_pc  |
| 15123 hsa-mir-15a | TCF19     | 0.3219807 mirna_pc   |
| 15124 hsa-mir-15a | HOXA10    | 0.3703557 mirna_pc   |
| 15125 hsa-mir-15a | DLEU2     | 0.486294935 mirna_pc |
| 15126 hsa-mir-15a | SSB       | 0.362466707 mirna_pc |
| 15127 hsa-mir-15a | PUS1      | 0.310456919 mirna_pc |
| 15128 hsa-mir-15a | FBX05     | 0.313059614 mirna_pc |
| 15129 hsa-mir-15a | FIGNL1    | 0.343205582 mirna_pc |
| 15130 hsa-mir-15a | E2F3      | 0.439949388 mirna_pc |
| 15131 hsa-mir-15a | DSCC1     | 0.314453456 mirna_pc |
| 15132 hsa-mir-15a | C13orf34  | 0.509214723 mirna_pc |
| 15133 hsa-mir-15a | CLN6      | 0.31001133 mirna_pc  |
| 15134 hsa-mir-15a | MCM8      | 0.376664908 mirna_pc |
| 15135 hsa-mir-15a | DNAJB11   | 0.308639049 mirna_pc |
| 15136 hsa-mir-15a | C14orf106 | 0.347883757 mirna_pc |
| 15137 hsa-mir-15a | CBX8      | 0.330778625 mirna_pc |
| 15138 hsa-mir-15a | TRMT6     | 0.313503801 mirna_pc |
| 15139 hsa-mir-15a | SRRT      | 0.359125656 mirna_pc |
| 15140 hsa-mir-15a | DBF4B     | 0.308853373 mirna_pc |
| 15141 hsa-mir-15a | MARVELD3  | 0.306462293 mirna_pc |
| 15142 hsa-mir-15a | C13orf37  | 0.422326492 mirna_pc |
| 15143 hsa-mir-15a | HNRNPM    | 0.331982082 mirna_pc |
| 15144 hsa-mir-15a | LSM 12.00 | 0.301250896 mirna_pc |
| 15145 hsa-mir-15a | HMG2      | 0.301925593 mirna_pc |
| 15146 hsa-mir-15a | TRPM2     | 0.306587837 mirna_pc |
| 15147 hsa-mir-15a | SFRS1     | 0.474668376 mirna_pc |
| 15148 hsa-mir-15a | C4orf46   | 0.326472524 mirna_pc |
| 15149 hsa-mir-15a | FTSJ2     | 0.353245348 mirna_pc |
| 15150 hsa-mir-15a | PDSS1     | 0.305793146 mirna_pc |
| 15151 hsa-mir-15a | CENPJ     | 0.409144183 mirna_pc |
| 15152 hsa-mir-15a | C21orf58  | 0.305156164 mirna_pc |
| 15153 hsa-mir-15a | PTMA      | 0.320686004 mirna_pc |
| 15154 hsa-mir-15a | SUV39H2   | 0.300149305 mirna_pc |
| 15155 hsa-mir-15a | FANCL     | 0.310245634 mirna_pc |
| 15156 hsa-mir-15a | HNRNPD    | 0.323907151 mirna_pc |
| 15157 hsa-mir-15a | GTF2F2    | 0.35933927 mirna_pc  |
| 15158 hsa-mir-15a | POP1      | 0.348676712 mirna_pc |
| 15159 hsa-mir-15a | HSP90B1   | 0.324513823 mirna_pc |
| 15160 hsa-mir-15a | NUDT15    | 0.384300496 mirna_pc |
| 15161 hsa-mir-15a | FASTKD1   | 0.350715724 mirna_pc |
| 15162 hsa-mir-15a | ATP13A3   | 0.317265119 mirna_pc |
| 15163 hsa-mir-15a | DHFR      | 0.359246016 mirna_pc |
| 15164 hsa-mir-15a | DEK       | 0.309768779 mirna_pc |
| 15165 hsa-mir-15a | TRIB3     | 0.347531532 mirna_pc |
| 15166 hsa-mir-15a | CCNE2     | 0.311451887 mirna_pc |
| 15167 hsa-mir-15a | PASK      | 0.30772653 mirna_pc  |
| 15168 hsa-mir-15a | C1orf131  | 0.353114929 mirna_pc |
| 15169 hsa-mir-15a | HEATR2    | 0.306865446 mirna_pc |
| 15170 hsa-mir-15a | SNRNP2    | 0.347516506 mirna_pc |
| 15171 hsa-mir-15a | HNRNPK    | 0.303052406 mirna_pc |
| 15172 hsa-mir-15a | SR140     | 0.320686884 mirna_pc |
| 15173 hsa-mir-15a | GAR1      | 0.334013541 mirna_pc |

|                   |          |                      |
|-------------------|----------|----------------------|
| 15174 hsa-mir-15a | CEP152   | 0.331278358 mirna_pc |
| 15175 hsa-mir-15a | RNF219   | 0.535490929 mirna_pc |
| 15176 hsa-mir-15a | ENOPH1   | 0.320071067 mirna_pc |
| 15177 hsa-mir-15a | C17orf42 | 0.392429497 mirna_pc |
| 15178 hsa-mir-15a | POMP     | 0.309938196 mirna_pc |
| 15179 hsa-mir-15a | KIAA0564 | 0.30308752 mirna_pc  |
| 15180 hsa-mir-15a | XRN2     | 0.362895679 mirna_pc |
| 15181 hsa-mir-15a | CASP3    | 0.360540807 mirna_pc |
| 15182 hsa-mir-15a | SMC3     | 0.311950857 mirna_pc |
| 15183 hsa-mir-15a | BAT1     | 0.353255542 mirna_pc |
| 15184 hsa-mir-15a | COIL     | 0.311191926 mirna_pc |
| 15185 hsa-mir-15a | NANP     | 0.349303001 mirna_pc |
| 15186 hsa-mir-15a | SUZ12    | 0.315020783 mirna_pc |
| 15187 hsa-mir-15a | HMGB1    | 0.471443794 mirna_pc |
| 15188 hsa-mir-15a | ZC3H18   | 0.375526443 mirna_pc |
| 15189 hsa-mir-15a | PIK3AP1  | 0.363027562 mirna_pc |
| 15190 hsa-mir-15a | SNX5     | 0.35434589 mirna_pc  |
| 15191 hsa-mir-15a | THUMP2   | 0.306301509 mirna_pc |
| 15192 hsa-mir-15a | FAM96A   | 0.307952671 mirna_pc |
| 15193 hsa-mir-15a | SOX9     | 0.353243721 mirna_pc |
| 15194 hsa-mir-15a | SNORD1C  | 0.340791485 mirna_pc |
| 15195 hsa-mir-15a | C13orf27 | 0.34524696 mirna_pc  |
| 15196 hsa-mir-15a | EXOSC9   | 0.300703163 mirna_pc |
| 15197 hsa-mir-15a | GK3P     | 0.303452453 mirna_pc |
| 15198 hsa-mir-15a | RBMX     | 0.341073372 mirna_pc |
| 15199 hsa-mir-15a | GPR180   | 0.356846258 mirna_pc |
| 15200 hsa-mir-15a | EXOSC8   | 0.310036364 mirna_pc |
| 15201 hsa-mir-15a | PDIA6    | 0.306758067 mirna_pc |
| 15202 hsa-mir-15a | ZNF519   | 0.335840033 mirna_pc |
| 15203 hsa-mir-15a | SCLT1    | 0.312009492 mirna_pc |
| 15204 hsa-mir-15a | WDR90    | 0.305171263 mirna_pc |
| 15205 hsa-mir-15a | CCDC14   | 0.344411346 mirna_pc |
| 15206 hsa-mir-15a | SUZ12P   | 0.312960914 mirna_pc |
| 15207 hsa-mir-15a | FAM136A  | 0.343252099 mirna_pc |
| 15208 hsa-mir-15a | COG3     | 0.300524834 mirna_pc |
| 15209 hsa-mir-15a | RBCK1    | 0.337803618 mirna_pc |
| 15210 hsa-mir-15a | EML4     | 0.320621622 mirna_pc |
| 15211 hsa-mir-15a | BZW2     | 0.365138676 mirna_pc |
| 15212 hsa-mir-15a | CSNK2A1  | 0.343451623 mirna_pc |
| 15213 hsa-mir-15a | RPIA     | 0.40249618 mirna_pc  |
| 15214 hsa-mir-15a | C7orf44  | 0.323700335 mirna_pc |
| 15215 hsa-mir-15a | NAT9     | 0.338756176 mirna_pc |
| 15216 hsa-mir-15a | NAA16    | 0.388607093 mirna_pc |
| 15217 hsa-mir-15a | SLC27A2  | 0.341431238 mirna_pc |
| 15218 hsa-mir-15a | UTP14C   | 0.363241851 mirna_pc |
| 15219 hsa-mir-15a | DLEU1    | 0.36924777 mirna_pc  |
| 15220 hsa-mir-15a | C13orf23 | 0.376796845 mirna_pc |
| 15221 hsa-mir-15a | TCERG1   | 0.352747288 mirna_pc |
| 15222 hsa-mir-15a | PSPC1    | 0.32752557 mirna_pc  |
| 15223 hsa-mir-15a | TOP1P1   | 0.315625141 mirna_pc |
| 15224 hsa-mir-15a | E2F6     | 0.340209556 mirna_pc |
| 15225 hsa-mir-15a | SLC25A15 | 0.433706817 mirna_pc |
| 15226 hsa-mir-15a | SFRS13A  | 0.34398126 mirna_pc  |
| 15227 hsa-mir-15a | TGDS     | 0.392593305 mirna_pc |

|       |             |          |             |          |
|-------|-------------|----------|-------------|----------|
| 15228 | hsa-mir-15a | KIAA1704 | 0.358036537 | mirna_pc |
| 15229 | hsa-mir-15a | ZNF828   | 0.335660273 | mirna_pc |
| 15230 | hsa-mir-15a | SMC1A    | 0.331921836 | mirna_pc |
| 15231 | hsa-mir-15a | NUPL1    | 0.437741384 | mirna_pc |
| 15232 | hsa-mir-15a | WBP4     | 0.351486562 | mirna_pc |
| 15233 | hsa-mir-15a | SUGT1    | 0.319196224 | mirna_pc |
| 15234 | hsa-mir-15a | ANKRD5   | 0.383984297 | mirna_pc |
| 15235 | hsa-mir-15a | DPP4     | 0.359892009 | mirna_pc |
| 15236 | hsa-mir-15a | UPF3A    | 0.322105515 | mirna_pc |
| 15237 | hsa-mir-15a | SFRS7    | 0.327194173 | mirna_pc |
| 15238 | hsa-mir-15a | CCAR1    | 0.313916083 | mirna_pc |
| 15239 | hsa-mir-15a | RBM10    | 0.347820929 | mirna_pc |
| 15240 | hsa-mir-15a | UFM1     | 0.374407507 | mirna_pc |
| 15241 | hsa-mir-15a | KBTBD7   | 0.367471441 | mirna_pc |
| 15242 | hsa-mir-15a | ATP7B    | 0.307558933 | mirna_pc |
| 15243 | hsa-mir-15a | RENBP    | 0.310250904 | mirna_pc |
| 15244 | hsa-mir-15a | SYAP1    | 0.300368691 | mirna_pc |
| 15245 | hsa-mir-15a | RCBTB1   | 0.346348114 | mirna_pc |
| 15246 | hsa-mir-15a | SPRY4    | 0.309668786 | mirna_pc |
| 15247 | hsa-mir-15a | RNF6     | 0.383676277 | mirna_pc |
| 15248 | hsa-mir-15a | ALG5     | 0.372730806 | mirna_pc |
| 15249 | hsa-mir-15a | IWS1     | 0.319433902 | mirna_pc |
| 15250 | hsa-mir-15a | MAP2K6   | 0.333755815 | mirna_pc |
| 15251 | hsa-mir-15a | CASP6    | 0.320195919 | mirna_pc |
| 15252 | hsa-mir-15a | RBM26    | 0.315368605 | mirna_pc |
| 15253 | hsa-mir-15a | ZNF92    | 0.335558982 | mirna_pc |
| 15254 | hsa-mir-15a | FASTKD5  | 0.41185733  | mirna_pc |
| 15255 | hsa-mir-15a | TASP1    | 0.326778581 | mirna_pc |
| 15256 | hsa-mir-15a | IPO5     | 0.32727349  | mirna_pc |
| 15257 | hsa-mir-15a | ALG11    | 0.377624005 | mirna_pc |
| 15258 | hsa-mir-15a | MCCC2    | 0.305754223 | mirna_pc |
| 15259 | hsa-mir-15a | MTRF1    | 0.373047348 | mirna_pc |
| 15260 | hsa-mir-15a | ZNF124   | 0.40388247  | mirna_pc |
| 15261 | hsa-mir-15a | RNASEH2B | 0.482156646 | mirna_pc |
| 15262 | hsa-mir-15a | RFXAP    | 0.359852897 | mirna_pc |
| 15263 | hsa-mir-15a | ANP32A   | 0.327323251 | mirna_pc |
| 15264 | hsa-mir-15a | DIS3     | 0.338928774 | mirna_pc |
| 15265 | hsa-mir-15a | STARD3   | 0.345470352 | mirna_pc |
| 15266 | hsa-mir-15a | NUFIP1   | 0.409671801 | mirna_pc |
| 15267 | hsa-mir-15a | ZNF195   | 0.3963912   | mirna_pc |
| 15268 | hsa-mir-15a | GZF1     | 0.349519884 | mirna_pc |
| 15269 | hsa-mir-15a | MED4     | 0.364462988 | mirna_pc |
| 15270 | hsa-mir-15a | NEK3     | 0.451254588 | mirna_pc |
| 15271 | hsa-mir-15a | THSD1P1  | 0.430530854 | mirna_pc |
| 15272 | hsa-mir-15a | TMEM170A | 0.316696071 | mirna_pc |
| 15273 | hsa-mir-15a | FAM48A   | 0.442794419 | mirna_pc |
| 15274 | hsa-mir-15a | DNAJC15  | 0.30294623  | mirna_pc |
| 15275 | hsa-mir-15a | PNN      | 0.303664579 | mirna_pc |
| 15276 | hsa-mir-15a | PAN3     | 0.3204284   | mirna_pc |
| 15277 | hsa-mir-15a | ZMYM2    | 0.302724738 | mirna_pc |
| 15278 | hsa-mir-15a | CCNJ     | 0.300792664 | mirna_pc |
| 15279 | hsa-mir-15a | PIBF1    | 0.311845929 | mirna_pc |
| 15280 | hsa-mir-15a | KBTBD6   | 0.338231263 | mirna_pc |
| 15281 | hsa-mir-15a | ESF1     | 0.301320325 | mirna_pc |

|       |              |            |             |          |
|-------|--------------|------------|-------------|----------|
| 15282 | hsa-mir-15a  | SUGT1L1    | 0.357819805 | mirna_pc |
| 15283 | hsa-mir-15a  | CTPS2      | 0.344365818 | mirna_pc |
| 15284 | hsa-mir-15a  | XPO4       | 0.356052588 | mirna_pc |
| 15285 | hsa-mir-15a  | PDX1       | 0.329939054 | mirna_pc |
| 15286 | hsa-mir-15a  | SNCAIP     | 0.304716408 | mirna_pc |
| 15287 | hsa-mir-15a  | IFT88      | 0.354496626 | mirna_pc |
| 15288 | hsa-mir-15a  | RPS10P7    | 0.30638741  | mirna_pc |
| 15289 | hsa-mir-15a  | FANCF      | 0.349334399 | mirna_pc |
| 15290 | hsa-mir-15a  | PDS5B      | 0.300549271 | mirna_pc |
| 15291 | hsa-mir-15a  | CIAO1      | 0.30987621  | mirna_pc |
| 15292 | hsa-mir-15a  | VPS36      | 0.403901658 | mirna_pc |
| 15293 | hsa-mir-15a  | NCRNA00183 | 0.303518759 | mirna_pc |
| 15294 | hsa-mir-15a  | KPNA3      | 0.405158081 | mirna_pc |
| 15295 | hsa-mir-15a  | ZCCHC3     | 0.422798414 | mirna_pc |
| 15296 | hsa-mir-15a  | KATNAL2    | 0.346845295 | mirna_pc |
| 15297 | hsa-mir-15a  | GTF3A      | 0.31525767  | mirna_pc |
| 15298 | hsa-mir-15a  | TPP2       | 0.325410484 | mirna_pc |
| 15299 | hsa-mir-15a  | ZNF530     | 0.303182875 | mirna_pc |
| 15300 | hsa-mir-15a  | MIR17HG    | 0.437195993 | mirna_pc |
| 15301 | hsa-mir-15a  | AARSD1     | 0.324879239 | mirna_pc |
| 15302 | hsa-mir-15a  | ELF1       | 0.386869381 | mirna_pc |
| 15303 | hsa-mir-15a  | MRPS31     | 0.392976708 | mirna_pc |
| 15304 | hsa-mir-15a  | DNMT3A     | 0.306607248 | mirna_pc |
| 15305 | hsa-mir-15a  | ZNF670     | 0.305890016 | mirna_pc |
| 15306 | hsa-mir-3651 | CDK1       | 0.398643161 | mirna_pc |
| 15307 | hsa-mir-3651 | ANLN       | 0.387850099 | mirna_pc |
| 15308 | hsa-mir-3651 | NCAPG      | 0.315107496 | mirna_pc |
| 15309 | hsa-mir-3651 | CLSPN      | 0.317284629 | mirna_pc |
| 15310 | hsa-mir-3651 | MELK       | 0.31703632  | mirna_pc |
| 15311 | hsa-mir-3651 | DLGAP5     | 0.33531159  | mirna_pc |
| 15312 | hsa-mir-3651 | FANCB      | 0.330274586 | mirna_pc |
| 15313 | hsa-mir-3651 | CKAP2L     | 0.317195957 | mirna_pc |
| 15314 | hsa-mir-3651 | CENPK      | 0.426969366 | mirna_pc |
| 15315 | hsa-mir-3651 | CENPE      | 0.317012881 | mirna_pc |
| 15316 | hsa-mir-3651 | CDKN3      | 0.301565446 | mirna_pc |
| 15317 | hsa-mir-3651 | HMMR       | 0.361624649 | mirna_pc |
| 15318 | hsa-mir-3651 | HELLS      | 0.31418878  | mirna_pc |
| 15319 | hsa-mir-3651 | NCAPD2     | 0.301906794 | mirna_pc |
| 15320 | hsa-mir-3651 | C6orf167   | 0.311349283 | mirna_pc |
| 15321 | hsa-mir-3651 | PRR11      | 0.303157527 | mirna_pc |
| 15322 | hsa-mir-3651 | KIAA1524   | 0.320184803 | mirna_pc |
| 15323 | hsa-mir-3651 | BRIP1      | 0.388120702 | mirna_pc |
| 15324 | hsa-mir-3651 | WDHD1      | 0.305442797 | mirna_pc |
| 15325 | hsa-mir-3651 | ATAD2      | 0.333619467 | mirna_pc |
| 15326 | hsa-mir-3651 | DNAJC9     | 0.340136236 | mirna_pc |
| 15327 | hsa-mir-3651 | TEAD4      | 0.362506041 | mirna_pc |
| 15328 | hsa-mir-3651 | DNA2       | 0.301609365 | mirna_pc |
| 15329 | hsa-mir-3651 | CDCA4      | 0.300134565 | mirna_pc |
| 15330 | hsa-mir-3651 | E2F7       | 0.340103499 | mirna_pc |
| 15331 | hsa-mir-3651 | NOP2       | 0.318473397 | mirna_pc |
| 15332 | hsa-mir-3651 | CDC7       | 0.328209157 | mirna_pc |
| 15333 | hsa-mir-3651 | FBX05      | 0.300830036 | mirna_pc |
| 15334 | hsa-mir-3651 | SMC2       | 0.48113875  | mirna_pc |
| 15335 | hsa-mir-3651 | C17orf51   | 0.424174198 | mirna_pc |



|                    |           |                      |
|--------------------|-----------|----------------------|
| 15336 hsa-mir-3651 | ZNF367    | 0.378345832 mirna_pc |
| 15337 hsa-mir-3651 | PUS7      | 0.368356956 mirna_pc |
| 15338 hsa-mir-3651 | EIF2AK2   | 0.305221536 mirna_pc |
| 15339 hsa-mir-3651 | NUDCD1    | 0.374576471 mirna_pc |
| 15340 hsa-mir-3651 | PPAT      | 0.301429664 mirna_pc |
| 15341 hsa-mir-3651 | TEX10     | 0.378168249 mirna_pc |
| 15342 hsa-mir-3651 | MICB      | 0.305227602 mirna_pc |
| 15343 hsa-mir-3651 | VAV2      | 0.410340373 mirna_pc |
| 15344 hsa-mir-3651 | FIGN      | 0.304551186 mirna_pc |
| 15345 hsa-mir-3651 | HSP90AA1  | 0.322311475 mirna_pc |
| 15346 hsa-mir-3651 | CCDC18    | 0.337816008 mirna_pc |
| 15347 hsa-mir-3651 | ROD1      | 0.300226661 mirna_pc |
| 15348 hsa-mir-3651 | HAUS6     | 0.34621789 mirna_pc  |
| 15349 hsa-mir-3651 | PTPN12    | 0.368567994 mirna_pc |
| 15350 hsa-mir-3651 | PBX3      | 0.330887255 mirna_pc |
| 15351 hsa-mir-3651 | CCL4L2    | 0.304822831 mirna_pc |
| 15352 hsa-mir-3651 | MMP12     | 0.475368922 mirna_pc |
| 15353 hsa-mir-3651 | PLEK2     | 0.534848391 mirna_pc |
| 15354 hsa-mir-3651 | CCNE2     | 0.323381086 mirna_pc |
| 15355 hsa-mir-3651 | CTSL2     | 0.40070675 mirna_pc  |
| 15356 hsa-mir-3651 | C14orf145 | 0.345312032 mirna_pc |
| 15357 hsa-mir-3651 | STX17     | 0.308241926 mirna_pc |
| 15358 hsa-mir-3651 | DDX21     | 0.308867967 mirna_pc |
| 15359 hsa-mir-3651 | NUP188    | 0.303597688 mirna_pc |
| 15360 hsa-mir-3651 | HNRNPK    | 0.369590209 mirna_pc |
| 15361 hsa-mir-3651 | CTNNAL1   | 0.65172003 mirna_pc  |
| 15362 hsa-mir-3651 | RAD23B    | 0.30453571 mirna_pc  |
| 15363 hsa-mir-3651 | CEP78     | 0.417422113 mirna_pc |
| 15364 hsa-mir-3651 | RUFY2     | 0.300983384 mirna_pc |
| 15365 hsa-mir-3651 | M6PR      | 0.315077491 mirna_pc |
| 15366 hsa-mir-3651 | KPNB1     | 0.335450736 mirna_pc |
| 15367 hsa-mir-3651 | OTUD6B    | 0.458027127 mirna_pc |
| 15368 hsa-mir-3651 | RECQL     | 0.394513638 mirna_pc |
| 15369 hsa-mir-3651 | TMX1      | 0.312675534 mirna_pc |
| 15370 hsa-mir-3651 | NCBP1     | 0.397263115 mirna_pc |
| 15371 hsa-mir-3651 | FANCM     | 0.338619419 mirna_pc |
| 15372 hsa-mir-3651 | USP1      | 0.324369907 mirna_pc |
| 15373 hsa-mir-3651 | HIATL1    | 0.350866285 mirna_pc |
| 15374 hsa-mir-3651 | C9orf30   | 0.319912647 mirna_pc |
| 15375 hsa-mir-3651 | SEMA3D    | 0.30185939 mirna_pc  |
| 15376 hsa-mir-3651 | DDX47     | 0.317845139 mirna_pc |
| 15377 hsa-mir-3651 | C9orf40   | 0.376941765 mirna_pc |
| 15378 hsa-mir-3651 | PPP3R1    | 0.340405138 mirna_pc |
| 15379 hsa-mir-3651 | ERCC4     | 0.30959723 mirna_pc  |
| 15380 hsa-mir-3651 | CAB39     | 0.381781072 mirna_pc |
| 15381 hsa-mir-3651 | CCDC41    | 0.349204498 mirna_pc |
| 15382 hsa-mir-3651 | LOC647121 | 0.320650889 mirna_pc |
| 15383 hsa-mir-3651 | NOL8      | 0.333352024 mirna_pc |
| 15384 hsa-mir-3651 | CSPG4     | 0.36214812 mirna_pc  |
| 15385 hsa-mir-3651 | PIGH      | 0.301460625 mirna_pc |
| 15386 hsa-mir-3651 | CHORDC1   | 0.380032492 mirna_pc |
| 15387 hsa-mir-3651 | RPE       | 0.308028103 mirna_pc |
| 15388 hsa-mir-3651 | ARNTL2    | 0.393978506 mirna_pc |
| 15389 hsa-mir-3651 | ISCA1P1   | 0.323197278 mirna_pc |

|                    |          |                      |
|--------------------|----------|----------------------|
| 15390 hsa-mir-3651 | GOLT1B   | 0.400238828 mirna_pc |
| 15391 hsa-mir-3651 | KIAA0020 | 0.306123909 mirna_pc |
| 15392 hsa-mir-3651 | HEPHL1   | 0.416067621 mirna_pc |
| 15393 hsa-mir-3651 | FER      | 0.361964143 mirna_pc |
| 15394 hsa-mir-3651 | PHTF2    | 0.392048239 mirna_pc |
| 15395 hsa-mir-3651 | NBN      | 0.31024395 mirna_pc  |
| 15396 hsa-mir-3651 | CYP26B1  | 0.375763976 mirna_pc |
| 15397 hsa-mir-3651 | GLMN     | 0.302799474 mirna_pc |
| 15398 hsa-mir-3651 | RMI1     | 0.43977288 mirna_pc  |
| 15399 hsa-mir-3651 | TMEM67   | 0.367103614 mirna_pc |
| 15400 hsa-mir-3651 | BAZ1B    | 0.357534981 mirna_pc |
| 15401 hsa-mir-3651 | FMNL2    | 0.307397474 mirna_pc |
| 15402 hsa-mir-3651 | GNAI1    | 0.326801713 mirna_pc |
| 15403 hsa-mir-3651 | PSMD5    | 0.437749645 mirna_pc |
| 15404 hsa-mir-3651 | IL12RB2  | 0.352973303 mirna_pc |
| 15405 hsa-mir-3651 | SPTLC1   | 0.374218428 mirna_pc |
| 15406 hsa-mir-3651 | MYBL1    | 0.316395969 mirna_pc |
| 15407 hsa-mir-3651 | COL17A1  | 0.331922244 mirna_pc |
| 15408 hsa-mir-3651 | COL13A1  | 0.303696327 mirna_pc |
| 15409 hsa-mir-3651 | PAPOLA   | 0.337453714 mirna_pc |
| 15410 hsa-mir-3651 | TMEM38B  | 0.331232194 mirna_pc |
| 15411 hsa-mir-3651 | PTPDC1   | 0.319072142 mirna_pc |
| 15412 hsa-mir-3651 | KIAA1033 | 0.394808331 mirna_pc |
| 15413 hsa-mir-3651 | WDR78    | 0.323315971 mirna_pc |
| 15414 hsa-mir-3651 | C8orf37  | 0.340198011 mirna_pc |
| 15415 hsa-mir-3651 | PDGFC    | 0.352491015 mirna_pc |
| 15416 hsa-mir-3651 | CREB5    | 0.344920055 mirna_pc |
| 15417 hsa-mir-3651 | THAP5    | 0.347451982 mirna_pc |
| 15418 hsa-mir-3651 | GTF3C4   | 0.370242414 mirna_pc |
| 15419 hsa-mir-3651 | SERPINE2 | 0.389821912 mirna_pc |
| 15420 hsa-mir-3651 | SPIN1    | 0.356273714 mirna_pc |
| 15421 hsa-mir-3651 | SPOPL    | 0.323994351 mirna_pc |
| 15422 hsa-mir-3651 | DNAJA1   | 0.375484398 mirna_pc |
| 15423 hsa-mir-3651 | SLC31A2  | 0.51665634 mirna_pc  |
| 15424 hsa-mir-3651 | KIF27    | 0.317148684 mirna_pc |
| 15425 hsa-mir-3651 | PPP2R5E  | 0.332274677 mirna_pc |
| 15426 hsa-mir-3651 | PDCD1LG2 | 0.334785188 mirna_pc |
| 15427 hsa-mir-3651 | UBQLN1   | 0.438046453 mirna_pc |
| 15428 hsa-mir-3651 | LPXN     | 0.33499919 mirna_pc  |
| 15429 hsa-mir-3651 | CEP110   | 0.46908113 mirna_pc  |
| 15430 hsa-mir-3651 | HERC4    | 0.441811688 mirna_pc |
| 15431 hsa-mir-3651 | BCLAF1   | 0.315610567 mirna_pc |
| 15432 hsa-mir-3651 | FUBP3    | 0.304992363 mirna_pc |
| 15433 hsa-mir-3651 | RTN4RL1  | 0.32400448 mirna_pc  |
| 15434 hsa-mir-3651 | IL7R     | 0.431686169 mirna_pc |
| 15435 hsa-mir-3651 | NRG1     | 0.47108503 mirna_pc  |
| 15436 hsa-mir-3651 | SEMA3A   | 0.426673131 mirna_pc |
| 15437 hsa-mir-3651 | GAPVD1   | 0.30313023 mirna_pc  |
| 15438 hsa-mir-3651 | FLRT2    | 0.328802329 mirna_pc |
| 15439 hsa-mir-3651 | IFT74    | 0.323661323 mirna_pc |
| 15440 hsa-mir-3651 | UHRF2    | 0.329274311 mirna_pc |
| 15441 hsa-mir-3651 | ERGIC2   | 0.386594275 mirna_pc |
| 15442 hsa-mir-3651 | HAPLN1   | 0.348364005 mirna_pc |
| 15443 hsa-mir-3651 | SGPP1    | 0.359617982 mirna_pc |

|                    |           |                      |
|--------------------|-----------|----------------------|
| 15444 hsa-mir-3651 | HIATL2    | 0.316441704 mirna_pc |
| 15445 hsa-mir-3651 | DNAJC25   | 0.309136 mirna_pc    |
| 15446 hsa-mir-3651 | IQCG      | 0.352825121 mirna_pc |
| 15447 hsa-mir-3651 | MFAP3L    | 0.35395069 mirna_pc  |
| 15448 hsa-mir-3651 | RAB14     | 0.350109079 mirna_pc |
| 15449 hsa-mir-3651 | CREB1     | 0.300977544 mirna_pc |
| 15450 hsa-mir-3651 | IKBKAP    | 0.49429714 mirna_pc  |
| 15451 hsa-mir-3651 | C9orf21   | 0.383398307 mirna_pc |
| 15452 hsa-mir-3651 | RC3H2     | 0.429151763 mirna_pc |
| 15453 hsa-mir-3651 | C10orf46  | 0.310715825 mirna_pc |
| 15454 hsa-mir-3651 | FKBP15    | 0.312957033 mirna_pc |
| 15455 hsa-mir-3651 | F3        | 0.397962001 mirna_pc |
| 15456 hsa-mir-3651 | GJC1      | 0.303098209 mirna_pc |
| 15457 hsa-mir-3651 | AGTPBP1   | 0.411566316 mirna_pc |
| 15458 hsa-let-7c   | HOXC8     | 0.390585933 mirna_pc |
| 15459 hsa-let-7c   | SEMA3E    | 0.862683824 mirna_pc |
| 15460 hsa-let-7c   | C4orf34   | 0.309684505 mirna_pc |
| 15461 hsa-let-7c   | EEF1A2    | 0.533364117 mirna_pc |
| 15462 hsa-let-7c   | MYEF2     | 0.329871559 mirna_pc |
| 15463 hsa-let-7c   | MYST4     | 0.507878522 mirna_pc |
| 15464 hsa-let-7c   | ZNF467    | 0.394503392 mirna_pc |
| 15465 hsa-let-7c   | ID4       | 0.422696398 mirna_pc |
| 15466 hsa-let-7c   | YPEL1     | 0.547173827 mirna_pc |
| 15467 hsa-let-7c   | CHEK2     | 0.336022376 mirna_pc |
| 15468 hsa-let-7c   | C22orf39  | 0.35190729 mirna_pc  |
| 15469 hsa-let-7c   | ZNF425    | 0.310093791 mirna_pc |
| 15470 hsa-let-7c   | ZNF25     | 0.331043852 mirna_pc |
| 15471 hsa-let-7c   | CITED2    | 0.799532695 mirna_pc |
| 15472 hsa-let-7c   | FAM82B    | 0.312042799 mirna_pc |
| 15473 hsa-let-7c   | TBC1D9    | 0.311115941 mirna_pc |
| 15474 hsa-let-7c   | ATP1B2    | 0.308022329 mirna_pc |
| 15475 hsa-let-7c   | CRYZL1    | 0.306462581 mirna_pc |
| 15476 hsa-let-7c   | NR2F2     | 0.717109702 mirna_pc |
| 15477 hsa-let-7c   | HDHD2     | 0.355622922 mirna_pc |
| 15478 hsa-let-7c   | DTWD1     | 0.373989968 mirna_pc |
| 15479 hsa-let-7c   | RASGRP2   | 0.407355207 mirna_pc |
| 15480 hsa-let-7c   | MTERFD3   | 0.320476728 mirna_pc |
| 15481 hsa-let-7c   | MSH2      | 0.364513499 mirna_pc |
| 15482 hsa-let-7c   | FAT4      | 0.369915487 mirna_pc |
| 15483 hsa-let-7c   | ZNF439    | 0.482883306 mirna_pc |
| 15484 hsa-let-7c   | SUOX      | 0.303516586 mirna_pc |
| 15485 hsa-let-7c   | POLI      | 0.611880151 mirna_pc |
| 15486 hsa-let-7c   | RNF185    | 0.34939741 mirna_pc  |
| 15487 hsa-let-7c   | TTC3      | 0.366815062 mirna_pc |
| 15488 hsa-let-7c   | LOC286367 | 0.330710066 mirna_pc |
| 15489 hsa-let-7c   | ZNF367    | 0.337115209 mirna_pc |
| 15490 hsa-let-7c   | CCDC106   | 0.389118921 mirna_pc |
| 15491 hsa-let-7c   | SLC5A12   | 0.431136906 mirna_pc |
| 15492 hsa-let-7c   | DLG4      | 0.391324503 mirna_pc |
| 15493 hsa-let-7c   | USP25     | 0.597664793 mirna_pc |
| 15494 hsa-let-7c   | LOC375190 | 0.673619923 mirna_pc |
| 15495 hsa-let-7c   | CRY1      | 0.393277011 mirna_pc |
| 15496 hsa-let-7c   | MTMR3     | 0.327899926 mirna_pc |
| 15497 hsa-let-7c   | HIST1H3D  | 0.400160104 mirna_pc |

|                  |           |                      |
|------------------|-----------|----------------------|
| 15498 hsa-let-7c | SLC2A11   | 0.568126802 mirna_pc |
| 15499 hsa-let-7c | ZNF433    | 0.402962342 mirna_pc |
| 15500 hsa-let-7c | TYW3      | 0.716218103 mirna_pc |
| 15501 hsa-let-7c | TDRD3     | 0.326749654 mirna_pc |
| 15502 hsa-let-7c | MKL2      | 0.34572796 mirna_pc  |
| 15503 hsa-let-7c | GAD1      | 0.365594179 mirna_pc |
| 15504 hsa-let-7c | OXR1      | 0.417217119 mirna_pc |
| 15505 hsa-let-7c | BBS4      | 0.308382929 mirna_pc |
| 15506 hsa-let-7c | ZNF248    | 0.321761499 mirna_pc |
| 15507 hsa-let-7c | TUB       | 0.372249018 mirna_pc |
| 15508 hsa-let-7c | FIGN      | 0.846863723 mirna_pc |
| 15509 hsa-let-7c | PRRT1     | 0.498806205 mirna_pc |
| 15510 hsa-let-7c | ARSG      | 0.370961898 mirna_pc |
| 15511 hsa-let-7c | SAMD11    | 0.56461491 mirna_pc  |
| 15512 hsa-let-7c | PHF10     | 0.474566106 mirna_pc |
| 15513 hsa-let-7c | LOC284900 | 0.3974711 mirna_pc   |
| 15514 hsa-let-7c | RGL2      | 0.303615169 mirna_pc |
| 15515 hsa-let-7c | CAPS2     | 0.702692127 mirna_pc |
| 15516 hsa-let-7c | PHC1      | 0.421077525 mirna_pc |
| 15517 hsa-let-7c | SCD5      | 0.344744562 mirna_pc |
| 15518 hsa-let-7c | CCDC121   | 0.403462194 mirna_pc |
| 15519 hsa-let-7c | SSBP2     | 0.326319443 mirna_pc |
| 15520 hsa-let-7c | TFAP2A    | 0.303213411 mirna_pc |
| 15521 hsa-let-7c | HABP4     | 0.774902461 mirna_pc |
| 15522 hsa-let-7c | TBCEL     | 0.375111215 mirna_pc |
| 15523 hsa-let-7c | C20orf160 | 0.53888005 mirna_pc  |
| 15524 hsa-let-7c | CSAD      | 0.431403017 mirna_pc |
| 15525 hsa-let-7c | RNF2      | 0.302419938 mirna_pc |
| 15526 hsa-let-7c | SFRS18    | 0.335143086 mirna_pc |
| 15527 hsa-let-7c | CTSL2     | 0.40616331 mirna_pc  |
| 15528 hsa-let-7c | PRAME     | 0.410467903 mirna_pc |
| 15529 hsa-let-7c | KIAA0776  | 0.427811337 mirna_pc |
| 15530 hsa-let-7c | CA11      | 0.520553223 mirna_pc |
| 15531 hsa-let-7c | TDG       | 0.317377785 mirna_pc |
| 15532 hsa-let-7c | HEATR5B   | 0.303091541 mirna_pc |
| 15533 hsa-let-7c | EIF4ENIF1 | 0.608061044 mirna_pc |
| 15534 hsa-let-7c | BAIAP3    | 0.490952104 mirna_pc |
| 15535 hsa-let-7c | LOC653501 | 0.336529725 mirna_pc |
| 15536 hsa-let-7c | TUG1      | 0.454550337 mirna_pc |
| 15537 hsa-let-7c | KIAA0182  | 0.307098522 mirna_pc |
| 15538 hsa-let-7c | AMN1      | 0.532775056 mirna_pc |
| 15539 hsa-let-7c | MGC21881  | 0.308394316 mirna_pc |
| 15540 hsa-let-7c | FAM184A   | 0.376081205 mirna_pc |
| 15541 hsa-let-7c | TDRD5     | 0.400956113 mirna_pc |
| 15542 hsa-let-7c | CILP2     | 0.528728256 mirna_pc |
| 15543 hsa-let-7c | ATP8B2    | 0.308242267 mirna_pc |
| 15544 hsa-let-7c | ZNF70     | 0.399182622 mirna_pc |
| 15545 hsa-let-7c | GRAMD1C   | 0.577949277 mirna_pc |
| 15546 hsa-let-7c | ZNF217    | 0.531645351 mirna_pc |
| 15547 hsa-let-7c | CYTSA     | 0.386288073 mirna_pc |
| 15548 hsa-let-7c | FAM161A   | 0.326527723 mirna_pc |
| 15549 hsa-let-7c | DYRK1A    | 0.34966192 mirna_pc  |
| 15550 hsa-let-7c | ZNF236    | 0.355341968 mirna_pc |
| 15551 hsa-let-7c | EFHD1     | 0.425019787 mirna_pc |

|                  |           |                      |
|------------------|-----------|----------------------|
| 15552 hsa-let-7c | LPHN2     | 0.663846018 mirna_pc |
| 15553 hsa-let-7c | HIST3H2A  | 0.351306561 mirna_pc |
| 15554 hsa-let-7c | C6orf120  | 0.339474951 mirna_pc |
| 15555 hsa-let-7c | ZNF23     | 0.313166915 mirna_pc |
| 15556 hsa-let-7c | AMY2B     | 0.318672551 mirna_pc |
| 15557 hsa-let-7c | CDKL3     | 0.332654237 mirna_pc |
| 15558 hsa-let-7c | BARD1     | 0.412805402 mirna_pc |
| 15559 hsa-let-7c | CNTNAP3   | 0.458280532 mirna_pc |
| 15560 hsa-let-7c | RPL23AP53 | 0.338338105 mirna_pc |
| 15561 hsa-let-7c | C16orf87  | 0.367223261 mirna_pc |
| 15562 hsa-let-7c | EDIL3     | 0.515962403 mirna_pc |
| 15563 hsa-let-7c | LOC144571 | 0.406241968 mirna_pc |
| 15564 hsa-let-7c | ZNF608    | 0.415088782 mirna_pc |
| 15565 hsa-let-7c | METTL13   | 0.36945727 mirna_pc  |
| 15566 hsa-let-7c | SEMA3D    | 0.876879951 mirna_pc |
| 15567 hsa-let-7c | HACE1     | 0.41567808 mirna_pc  |
| 15568 hsa-let-7c | ZNF451    | 0.303464062 mirna_pc |
| 15569 hsa-let-7c | KLRA1     | 0.344220985 mirna_pc |
| 15570 hsa-let-7c | SLC25A30  | 0.526844625 mirna_pc |
| 15571 hsa-let-7c | ZNF658    | 0.421342087 mirna_pc |
| 15572 hsa-let-7c | ERCC4     | 0.303794909 mirna_pc |
| 15573 hsa-let-7c | RBM43     | 0.408095863 mirna_pc |
| 15574 hsa-let-7c | GATA3     | 0.586508381 mirna_pc |
| 15575 hsa-let-7c | NBPF3     | 0.306487248 mirna_pc |
| 15576 hsa-let-7c | LOC162632 | 0.30112691 mirna_pc  |
| 15577 hsa-let-7c | RNPC3     | 0.395063156 mirna_pc |
| 15578 hsa-let-7c | OXTR      | 0.486007535 mirna_pc |
| 15579 hsa-let-7c | PAQR7     | 0.367797624 mirna_pc |
| 15580 hsa-let-7c | PEBP1     | 0.341473969 mirna_pc |
| 15581 hsa-let-7c | THSD7A    | 0.636507814 mirna_pc |
| 15582 hsa-let-7c | PPM1J     | 0.434199239 mirna_pc |
| 15583 hsa-let-7c | ZNF605    | 0.460544437 mirna_pc |
| 15584 hsa-let-7c | NDST2     | 0.346061894 mirna_pc |
| 15585 hsa-let-7c | RRAGB     | 0.370625029 mirna_pc |
| 15586 hsa-let-7c | KLRAQ1    | 0.401236773 mirna_pc |
| 15587 hsa-let-7c | PCGF6     | 0.324202558 mirna_pc |
| 15588 hsa-let-7c | OSR2      | 0.467282014 mirna_pc |
| 15589 hsa-let-7c | C12orf76  | 0.377745324 mirna_pc |
| 15590 hsa-let-7c | C6orf170  | 0.397726037 mirna_pc |
| 15591 hsa-let-7c | GABPA     | 0.405218072 mirna_pc |
| 15592 hsa-let-7c | ZFP161    | 0.324685014 mirna_pc |
| 15593 hsa-let-7c | MEX3B     | 0.321085256 mirna_pc |
| 15594 hsa-let-7c | SENP6     | 0.302646853 mirna_pc |
| 15595 hsa-let-7c | ZNF503    | 0.440772129 mirna_pc |
| 15596 hsa-let-7c | C8orf51   | 0.383558441 mirna_pc |
| 15597 hsa-let-7c | LOC728392 | 0.312677007 mirna_pc |
| 15598 hsa-let-7c | LANCL1    | 0.32417976 mirna_pc  |
| 15599 hsa-let-7c | AP3M1     | 0.336393852 mirna_pc |
| 15600 hsa-let-7c | ZNF607    | 0.364013418 mirna_pc |
| 15601 hsa-let-7c | FMR1      | 0.326948644 mirna_pc |
| 15602 hsa-let-7c | RGS16     | 0.305519241 mirna_pc |
| 15603 hsa-let-7c | KCNC3     | 0.569529993 mirna_pc |
| 15604 hsa-let-7c | ZFYVE16   | 0.325985248 mirna_pc |
| 15605 hsa-let-7c | PRRT2     | 0.322236749 mirna_pc |

|                  |          |                      |
|------------------|----------|----------------------|
| 15606 hsa-let-7c | RASSF8   | 0.354567537 mirna_pc |
| 15607 hsa-let-7c | PIK3C3   | 0.402034175 mirna_pc |
| 15608 hsa-let-7c | ZNF362   | 0.354112112 mirna_pc |
| 15609 hsa-let-7c | CHST10   | 0.303881342 mirna_pc |
| 15610 hsa-let-7c | NBN      | 0.308777229 mirna_pc |
| 15611 hsa-let-7c | ST8SIA1  | 0.341006144 mirna_pc |
| 15612 hsa-let-7c | ZNF84    | 0.398536298 mirna_pc |
| 15613 hsa-let-7c | TAF4B    | 0.393256395 mirna_pc |
| 15614 hsa-let-7c | ZNF140   | 0.327821788 mirna_pc |
| 15615 hsa-let-7c | TMEM67   | 0.314152779 mirna_pc |
| 15616 hsa-let-7c | MTA3     | 0.441018063 mirna_pc |
| 15617 hsa-let-7c | ZSCAN12  | 0.301236125 mirna_pc |
| 15618 hsa-let-7c | PUS10    | 0.369480002 mirna_pc |
| 15619 hsa-let-7c | SCAND3   | 0.308378871 mirna_pc |
| 15620 hsa-let-7c | SEC61A2  | 0.453730707 mirna_pc |
| 15621 hsa-let-7c | PSPC1    | 0.42980328 mirna_pc  |
| 15622 hsa-let-7c | INTU     | 0.322499298 mirna_pc |
| 15623 hsa-let-7c | DRG1     | 0.33298845 mirna_pc  |
| 15624 hsa-let-7c | SSX2IP   | 0.326675925 mirna_pc |
| 15625 hsa-let-7c | TMC8     | 0.300232439 mirna_pc |
| 15626 hsa-let-7c | NF2      | 0.529003857 mirna_pc |
| 15627 hsa-let-7c | KPNA5    | 0.351579248 mirna_pc |
| 15628 hsa-let-7c | MYBL1    | 0.605499741 mirna_pc |
| 15629 hsa-let-7c | ZNF624   | 0.318857161 mirna_pc |
| 15630 hsa-let-7c | TCTE3    | 0.320575993 mirna_pc |
| 15631 hsa-let-7c | WBP4     | 0.348149453 mirna_pc |
| 15632 hsa-let-7c | CHRNA1   | 0.316663586 mirna_pc |
| 15633 hsa-let-7c | CYR61    | 0.30292716 mirna_pc  |
| 15634 hsa-let-7c | RIMKLB   | 0.355070759 mirna_pc |
| 15635 hsa-let-7c | GAS1     | 0.423810867 mirna_pc |
| 15636 hsa-let-7c | EFNA5    | 0.626222067 mirna_pc |
| 15637 hsa-let-7c | HCG18    | 0.357725152 mirna_pc |
| 15638 hsa-let-7c | C18orf10 | 0.388322333 mirna_pc |
| 15639 hsa-let-7c | C10orf41 | 0.381486917 mirna_pc |
| 15640 hsa-let-7c | SUDS3    | 0.377644028 mirna_pc |
| 15641 hsa-let-7c | MAMSTR   | 0.562068515 mirna_pc |
| 15642 hsa-let-7c | TMEM136  | 0.491312538 mirna_pc |
| 15643 hsa-let-7c | CCDC78   | 0.429619856 mirna_pc |
| 15644 hsa-let-7c | DNM3     | 0.814523028 mirna_pc |
| 15645 hsa-let-7c | RPL7     | 0.366181242 mirna_pc |
| 15646 hsa-let-7c | SEMA3C   | 0.353000395 mirna_pc |
| 15647 hsa-let-7c | PEX2     | 0.370908253 mirna_pc |
| 15648 hsa-let-7c | WDR78    | 0.568926899 mirna_pc |
| 15649 hsa-let-7c | KGFLP2   | 0.408658571 mirna_pc |
| 15650 hsa-let-7c | IFT81    | 0.353633 mirna_pc    |
| 15651 hsa-let-7c | ZNF184   | 0.396445485 mirna_pc |
| 15652 hsa-let-7c | MBLAC2   | 0.402035342 mirna_pc |
| 15653 hsa-let-7c | NIPSNAP1 | 0.535319903 mirna_pc |
| 15654 hsa-let-7c | DEPDC5   | 0.37823237 mirna_pc  |
| 15655 hsa-let-7c | C8orf37  | 0.693788665 mirna_pc |
| 15656 hsa-let-7c | PDGFC    | 0.549770342 mirna_pc |
| 15657 hsa-let-7c | SPA17    | 0.34953477 mirna_pc  |
| 15658 hsa-let-7c | WDR92    | 0.364761676 mirna_pc |
| 15659 hsa-let-7c | SFI1     | 0.603289655 mirna_pc |

|                  |           |                            |
|------------------|-----------|----------------------------|
| 15660 hsa-let-7c | MAP3K12   | 0.637404249 mirna_pc       |
| 15661 hsa-let-7c | ZBTB10    | 0.433574755 mirna_pc       |
| 15662 hsa-let-7c | SOC5      | 0.425040971 mirna_pc       |
| 15663 hsa-let-7c | TTC21B    | 0.392566487 mirna_pc       |
| 15664 hsa-let-7c | ZNF627    | 0.335272522 mirna_pc       |
| 15665 hsa-let-7c | ANGPT1    | 0.859005583 mirna_pc       |
| 15666 hsa-let-7c | EXTL2     | 0.387476453 mirna_pc       |
| 15667 hsa-let-7c | ARID1A    | 0.355317308 mirna_pc       |
| 15668 hsa-let-7c | ATAD2B    | 0.350132319 mirna_pc       |
| 15669 hsa-let-7c | ZNF558    | 0.349277096 mirna_pc       |
| 15670 hsa-let-7c | NAB2      | 0.406713859 mirna_pc       |
| 15671 hsa-let-7c | FDXACB1   | 0.358850544 mirna_pc       |
| 15672 hsa-let-7c | ISYNA1    | 0.475448605 mirna_pc       |
| 15673 hsa-let-7c | LOC338758 | 0.503458397 mirna_pc       |
| 15674 hsa-let-7c | KIF27     | 0.377950987 mirna_pc       |
| 15675 hsa-let-7c |           | 7-Mar 0.300528051 mirna_pc |
| 15676 hsa-let-7c | PCMTD2    | 0.341395175 mirna_pc       |
| 15677 hsa-let-7c | PIM1      | 0.32558941 mirna_pc        |
| 15678 hsa-let-7c | CPT1C     | 0.324752543 mirna_pc       |
| 15679 hsa-let-7c | ZNF638    | 0.373808498 mirna_pc       |
| 15680 hsa-let-7c | ZNF20     | 0.357494852 mirna_pc       |
| 15681 hsa-let-7c | PIP5K1A   | 0.39446933 mirna_pc        |
| 15682 hsa-let-7c | TMX3      | 0.422571064 mirna_pc       |
| 15683 hsa-let-7c | ZNF512    | 0.40183685 mirna_pc        |
| 15684 hsa-let-7c | GRB14     | 0.550049282 mirna_pc       |
| 15685 hsa-let-7c | USP21     | 0.319987238 mirna_pc       |
| 15686 hsa-let-7c | ZNF74     | 0.408025279 mirna_pc       |
| 15687 hsa-let-7c | HTR7P1    | 0.578826455 mirna_pc       |
| 15688 hsa-let-7c | OSGEPL1   | 0.350930477 mirna_pc       |
| 15689 hsa-let-7c | PEX13     | 0.365910324 mirna_pc       |
| 15690 hsa-let-7c | DCAF17    | 0.313385317 mirna_pc       |
| 15691 hsa-let-7c | ETAA1     | 0.348893352 mirna_pc       |
| 15692 hsa-let-7c | HNRNPH3   | 0.364187702 mirna_pc       |
| 15693 hsa-let-7c | HMG3      | 0.322934744 mirna_pc       |
| 15694 hsa-let-7c | STAU2     | 0.344426168 mirna_pc       |
| 15695 hsa-let-7c | B4GALT6   | 0.425602383 mirna_pc       |
| 15696 hsa-let-7c | CEP290    | 0.342848236 mirna_pc       |
| 15697 hsa-let-7c | SP1       | 0.355757397 mirna_pc       |
| 15698 hsa-let-7c | KIF3A     | 0.312092687 mirna_pc       |
| 15699 hsa-let-7c | CNIH2     | 0.501810457 mirna_pc       |
| 15700 hsa-let-7c | HHAT      | 0.364184013 mirna_pc       |
| 15701 hsa-let-7c | PMS1      | 0.330798492 mirna_pc       |
| 15702 hsa-let-7c | EID3      | 0.668332909 mirna_pc       |
| 15703 hsa-let-7c | ALG10B    | 0.316859463 mirna_pc       |
| 15704 hsa-let-7c | KIAA1467  | 0.365392072 mirna_pc       |
| 15705 hsa-let-7c | ABHD12    | 0.378692168 mirna_pc       |
| 15706 hsa-let-7c | PAN3      | 0.313413611 mirna_pc       |
| 15707 hsa-let-7c | UBE2W     | 0.355077719 mirna_pc       |
| 15708 hsa-let-7c | GATS      | 0.550209565 mirna_pc       |
| 15709 hsa-let-7c | TRUB1     | 0.43237721 mirna_pc        |
| 15710 hsa-let-7c | PLAC2     | 0.686484885 mirna_pc       |
| 15711 hsa-let-7c | ROB01     | 0.355493883 mirna_pc       |
| 15712 hsa-let-7c | PDIK1L    | 0.340520699 mirna_pc       |
| 15713 hsa-let-7c | C2orf15   | 0.406149547 mirna_pc       |

|                  |                |                      |
|------------------|----------------|----------------------|
| 15714 hsa-let-7c | C12orf24       | 0.545686044 mirna_pc |
| 15715 hsa-let-7c | TAF3           | 0.328000976 mirna_pc |
| 15716 hsa-let-7c | NFYB           | 0.318279741 mirna_pc |
| 15717 hsa-let-7c | LCA5L          | 0.403888529 mirna_pc |
| 15718 hsa-let-7c | SEMA3A         | 0.72221461 mirna_pc  |
| 15719 hsa-let-7c | THNSL1         | 0.355607807 mirna_pc |
| 15720 hsa-let-7c | USP13          | 0.434092505 mirna_pc |
| 15721 hsa-let-7c | FAM120C        | 0.389440657 mirna_pc |
| 15722 hsa-let-7c | ESF1           | 0.32902746 mirna_pc  |
| 15723 hsa-let-7c | PDGFRL         | 0.447718892 mirna_pc |
| 15724 hsa-let-7c | GPR37          | 0.430882105 mirna_pc |
| 15725 hsa-let-7c | MIB1           | 0.333497976 mirna_pc |
| 15726 hsa-let-7c | SS18           | 0.41530792 mirna_pc  |
| 15727 hsa-let-7c | ZNF391         | 0.434344738 mirna_pc |
| 15728 hsa-let-7c | ZBTB41         | 0.34132565 mirna_pc  |
| 15729 hsa-let-7c | IFT74          | 0.620583519 mirna_pc |
| 15730 hsa-let-7c | MAST1          | 0.372774865 mirna_pc |
| 15731 hsa-let-7c | NR5A2          | 0.471593508 mirna_pc |
| 15732 hsa-let-7c | TTC39C         | 0.337377298 mirna_pc |
| 15733 hsa-let-7c | CDK19          | 0.325508733 mirna_pc |
| 15734 hsa-let-7c | MDM1           | 0.804498051 mirna_pc |
| 15735 hsa-let-7c | C10orf88       | 0.332658798 mirna_pc |
| 15736 hsa-let-7c | ZNF740         | 0.324034746 mirna_pc |
| 15737 hsa-let-7c | TRO            | 0.366891739 mirna_pc |
| 15738 hsa-let-7c | BBS10          | 0.455032063 mirna_pc |
| 15739 hsa-let-7c | PBX2           | 0.399771697 mirna_pc |
| 15740 hsa-let-7c | SFRS15         | 0.441502599 mirna_pc |
| 15741 hsa-let-7c | MLLT10         | 0.306179394 mirna_pc |
| 15742 hsa-let-7c | SLITRK6        | 0.649747615 mirna_pc |
| 15743 hsa-let-7c | PPTC7          | 0.304492345 mirna_pc |
| 15744 hsa-let-7c | ANKRD34A       | 0.449812668 mirna_pc |
| 15745 hsa-let-7c | HAPLN1         | 0.82199648 mirna_pc  |
| 15746 hsa-let-7c | C6orf70        | 0.342621478 mirna_pc |
| 15747 hsa-let-7c | RTF1           | 0.330868663 mirna_pc |
| 15748 hsa-let-7c | SYNGAP1        | 0.398745469 mirna_pc |
| 15749 hsa-let-7c | TBC1D22B       | 0.316356798 mirna_pc |
| 15750 hsa-let-7c | C8orf45        | 0.408151224 mirna_pc |
| 15751 hsa-let-7c | DBNDD1         | 0.392846824 mirna_pc |
| 15752 hsa-let-7c | PPOX           | 0.352582901 mirna_pc |
| 15753 hsa-let-7c | NEBL           | 0.31827415 mirna_pc  |
| 15754 hsa-let-7c | SAMD10         | 0.301923943 mirna_pc |
| 15755 hsa-let-7c | LOC221710      | 0.424178012 mirna_pc |
| 15756 hsa-let-7c | DKFZP686I15217 | 0.302740713 mirna_pc |
| 15757 hsa-let-7c | TSGA10         | 0.534451711 mirna_pc |
| 15758 hsa-let-7c | BRSK1          | 0.316815198 mirna_pc |
| 15759 hsa-let-7c | DGCR6          | 0.431884684 mirna_pc |
| 15760 hsa-let-7c | CRYZ           | 0.695961267 mirna_pc |
| 15761 hsa-let-7c | ZNF664         | 0.353081528 mirna_pc |
| 15762 hsa-let-7c | SMEK2          | 0.418979764 mirna_pc |
| 15763 hsa-let-7c | ATL2           | 0.464802872 mirna_pc |
| 15764 hsa-let-7c | RBBP6          | 0.312004014 mirna_pc |
| 15765 hsa-let-7c | CES8           | 0.320300259 mirna_pc |
| 15766 hsa-let-7c | TBX1           | 0.390894791 mirna_pc |
| 15767 hsa-let-7c | KDELC2         | 0.420710134 mirna_pc |



|                      |              |                      |
|----------------------|--------------|----------------------|
| 15768 hsa-let-7c     | KILLIN       | 0.344804107 mirna_pc |
| 15769 hsa-let-7c     | PRICKLE1     | 0.621027813 mirna_pc |
| 15770 hsa-let-7c     | GCFC1        | 0.301196223 mirna_pc |
| 15771 hsa-let-7c     | UBE3A        | 0.371888173 mirna_pc |
| 15772 hsa-let-7c     | ZCCHC11      | 0.364491079 mirna_pc |
| 15773 hsa-let-7c     | CETN3        | 0.303482559 mirna_pc |
| 15774 hsa-let-7c     | ZNF644       | 0.37379765 mirna_pc  |
| 15775 hsa-let-7c     | PRPF40B      | 0.305219411 mirna_pc |
| 15776 hsa-let-7c     | TCTN1        | 0.334296208 mirna_pc |
| 15777 hsa-let-7c     | CTXN1        | 0.641308883 mirna_pc |
| 15778 hsa-let-7c     | RNF215       | 0.338902593 mirna_pc |
| 15779 hsa-let-7c     | ZNF680       | 0.335015462 mirna_pc |
| 15780 hsa-let-7c     | LOC283070    | 0.595663745 mirna_pc |
| 15781 hsa-let-7c     | CCDC117      | 0.380776849 mirna_pc |
| 15782 hsa-let-7c     | C10orf46     | 0.345612349 mirna_pc |
| 15783 hsa-let-7c     | HSDL1        | 0.450701162 mirna_pc |
| 15784 hsa-let-7c     | SLC11A2      | 0.67783522 mirna_pc  |
| 15785 hsa-let-7c     | LOC100129387 | 0.49600704 mirna_pc  |
| 15786 hsa-let-7c     | FBX011       | 0.349462317 mirna_pc |
| 15787 hsa-let-7c     | HEY2         | 0.457708181 mirna_pc |
| 15788 hsa-let-7c     | ZFP37        | 0.352288191 mirna_pc |
| 15789 hsa-let-7c     | HSPC157      | 0.334735627 mirna_pc |
| 15790 hsa-let-7c     | THOC5        | 0.313588622 mirna_pc |
| 15791 hsa-let-7c     | CAMK1D       | 0.445829061 mirna_pc |
| 15792 hsa-let-7c     | LCA5         | 0.784510203 mirna_pc |
| 15793 hsa-let-7c     | CDC73        | 0.468453022 mirna_pc |
| 15794 hsa-let-7c     | SLC2A3       | 0.440504618 mirna_pc |
| 15795 hsa-let-7c     | C22orf29     | 0.392075489 mirna_pc |
| 15796 hsa-let-7c     | KIAA1107     | 0.359785891 mirna_pc |
| 15797 hsa-let-7c     | WDSUB1       | 0.426277811 mirna_pc |
| 15798 hsa-let-7c     | BTF3L4       | 0.414199783 mirna_pc |
| 15799 hsa-let-7c     | DDX59        | 0.324809765 mirna_pc |
| 15800 hsa-let-7c     | SS18L1       | 0.37164014 mirna_pc  |
| 15801 hsa-mir-181b-2 | TTYH3        | 0.318456938 mirna_pc |
| 15802 hsa-mir-181b-2 | GABPB1       | 0.337704292 mirna_pc |
| 15803 hsa-mir-181b-2 | SLC39A10     | 0.385898501 mirna_pc |
| 15804 hsa-mir-181b-2 | HSP90B1      | 0.306407993 mirna_pc |
| 15805 hsa-mir-181b-2 | CMTM1        | 0.416953604 mirna_pc |
| 15806 hsa-mir-181b-2 | RNF219       | 0.309971208 mirna_pc |
| 15807 hsa-mir-181b-2 | SMC3         | 0.315520789 mirna_pc |
| 15808 hsa-mir-181b-2 | SLC1A1       | 0.334612255 mirna_pc |
| 15809 hsa-mir-181b-2 | SC65         | 0.331155264 mirna_pc |
| 15810 hsa-mir-181b-2 | SOX9         | 0.310565641 mirna_pc |
| 15811 hsa-mir-181b-2 | PPP3R1       | 0.30680951 mirna_pc  |
| 15812 hsa-mir-181b-2 | CXorf38      | 0.361606733 mirna_pc |
| 15813 hsa-mir-181b-2 | ZBTB34       | 0.326929424 mirna_pc |
| 15814 hsa-mir-181b-2 | MED14        | 0.307150774 mirna_pc |
| 15815 hsa-mir-181b-2 | SMC1A        | 0.402495409 mirna_pc |
| 15816 hsa-mir-181b-2 | SH3KBP1      | 0.332571564 mirna_pc |
| 15817 hsa-mir-181b-2 | ARHGAP12     | 0.351966237 mirna_pc |
| 15818 hsa-mir-181b-2 | SYAP1        | 0.325656373 mirna_pc |
| 15819 hsa-mir-181b-2 | DHX15        | 0.373721392 mirna_pc |
| 15820 hsa-mir-181b-2 | MAP2K6       | 0.301495414 mirna_pc |
| 15821 hsa-mir-181b-2 | PRKD3        | 0.318192845 mirna_pc |

|       |                |         |             |          |
|-------|----------------|---------|-------------|----------|
| 15822 | hsa-mir-181b-2 | KIF5B   | 0.315218977 | mirna_pc |
| 15823 | hsa-mir-181b-2 | HS3ST1  | 0.351943625 | mirna_pc |
| 15824 | hsa-mir-181b-2 | TRUB1   | 0.306768127 | mirna_pc |
| 15825 | hsa-mir-181b-2 | KDM5C   | 0.341551095 | mirna_pc |
| 15826 | hsa-mir-181b-2 | TCF7L2  | 0.318879037 | mirna_pc |
| 15827 | hsa-mir-181b-2 | SNRNP27 | 0.418988001 | mirna_pc |
| 15828 | hsa-mir-181b-2 | HMG20A  | 0.300899024 | mirna_pc |
| 15829 | hsa-mir-181b-2 | TANK    | 0.307859625 | mirna_pc |
| 15830 | hsa-mir-24-2   | KPNA2   | 0.53315743  | mirna_pc |
| 15831 | hsa-mir-24-2   | RCC2    | 0.366387708 | mirna_pc |
| 15832 | hsa-mir-24-2   | RRM2    | 0.366481982 | mirna_pc |
| 15833 | hsa-mir-24-2   | PLK1    | 0.350572617 | mirna_pc |
| 15834 | hsa-mir-24-2   | MCM4    | 0.325305229 | mirna_pc |
| 15835 | hsa-mir-24-2   | NCAPG   | 0.331185009 | mirna_pc |
| 15836 | hsa-mir-24-2   | CDC20   | 0.528972199 | mirna_pc |
| 15837 | hsa-mir-24-2   | CCNA2   | 0.348745494 | mirna_pc |
| 15838 | hsa-mir-24-2   | CEP55   | 0.329107258 | mirna_pc |
| 15839 | hsa-mir-24-2   | LMNB2   | 0.391144519 | mirna_pc |
| 15840 | hsa-mir-24-2   | MND1    | 0.322619662 | mirna_pc |
| 15841 | hsa-mir-24-2   | KIF22   | 0.352257998 | mirna_pc |
| 15842 | hsa-mir-24-2   | DDX39   | 0.488086486 | mirna_pc |
| 15843 | hsa-mir-24-2   | FAM49B  | 0.344630748 | mirna_pc |
| 15844 | hsa-mir-24-2   | NCAPH   | 0.30675351  | mirna_pc |
| 15845 | hsa-mir-24-2   | RAD54L  | 0.307760375 | mirna_pc |
| 15846 | hsa-mir-24-2   | CENPA   | 0.46974741  | mirna_pc |
| 15847 | hsa-mir-24-2   | TROAP   | 0.328911305 | mirna_pc |
| 15848 | hsa-mir-24-2   | CCNB1   | 0.477622785 | mirna_pc |
| 15849 | hsa-mir-24-2   | CDC45   | 0.359090335 | mirna_pc |
| 15850 | hsa-mir-24-2   | STMN1   | 0.331164691 | mirna_pc |
| 15851 | hsa-mir-24-2   | CENPM   | 0.340764337 | mirna_pc |
| 15852 | hsa-mir-24-2   | TK1     | 0.437965463 | mirna_pc |
| 15853 | hsa-mir-24-2   | UBE2T   | 0.337215021 | mirna_pc |
| 15854 | hsa-mir-24-2   | CKS2    | 0.313098469 | mirna_pc |
| 15855 | hsa-mir-24-2   | CKS1B   | 0.477029848 | mirna_pc |
| 15856 | hsa-mir-24-2   | TUBB    | 0.359722595 | mirna_pc |
| 15857 | hsa-mir-24-2   | MCM2    | 0.30364663  | mirna_pc |
| 15858 | hsa-mir-24-2   | ORC1L   | 0.316278114 | mirna_pc |
| 15859 | hsa-mir-24-2   | UHRF1   | 0.346588553 | mirna_pc |
| 15860 | hsa-mir-24-2   | HN1     | 0.325548838 | mirna_pc |
| 15861 | hsa-mir-24-2   | RACGAP1 | 0.361598072 | mirna_pc |
| 15862 | hsa-mir-24-2   | PTBP1   | 0.46726939  | mirna_pc |
| 15863 | hsa-mir-24-2   | CCNB2   | 0.390611836 | mirna_pc |
| 15864 | hsa-mir-24-2   | PTTG1   | 0.554054168 | mirna_pc |
| 15865 | hsa-mir-24-2   | RAD51   | 0.347961295 | mirna_pc |
| 15866 | hsa-mir-24-2   | NME1    | 0.377345104 | mirna_pc |
| 15867 | hsa-mir-24-2   | PAICS   | 0.354478093 | mirna_pc |
| 15868 | hsa-mir-24-2   | BIRC5   | 0.49062882  | mirna_pc |
| 15869 | hsa-mir-24-2   | RCC1    | 0.414504695 | mirna_pc |
| 15870 | hsa-mir-24-2   | AURKB   | 0.402135554 | mirna_pc |
| 15871 | hsa-mir-24-2   | CDT1    | 0.404867276 | mirna_pc |
| 15872 | hsa-mir-24-2   | KIF20A  | 0.405327188 | mirna_pc |
| 15873 | hsa-mir-24-2   | PSMB2   | 0.499141573 | mirna_pc |
| 15874 | hsa-mir-24-2   | CDC43   | 0.346083993 | mirna_pc |
| 15875 | hsa-mir-24-2   | ALG3    | 0.448760411 | mirna_pc |

|                    |          |                      |
|--------------------|----------|----------------------|
| 15876 hsa-mir-24-2 | TMEM191A | 0.342322163 mirna_pc |
| 15877 hsa-mir-24-2 | ORC6L    | 0.335904746 mirna_pc |
| 15878 hsa-mir-24-2 | ERH      | 0.387009727 mirna_pc |
| 15879 hsa-mir-24-2 | PSMA7    | 0.303770906 mirna_pc |
| 15880 hsa-mir-24-2 | C16orf59 | 0.388474201 mirna_pc |
| 15881 hsa-mir-24-2 | CDKN3    | 0.376837375 mirna_pc |
| 15882 hsa-mir-24-2 | ADRM1    | 0.335075137 mirna_pc |
| 15883 hsa-mir-24-2 | ACTL6A   | 0.374577719 mirna_pc |
| 15884 hsa-mir-24-2 | HNRNPL   | 0.411546847 mirna_pc |
| 15885 hsa-mir-24-2 | PKMYT1   | 0.483544637 mirna_pc |
| 15886 hsa-mir-24-2 | SF3B4    | 0.330568174 mirna_pc |
| 15887 hsa-mir-24-2 | TUBA1B   | 0.474328764 mirna_pc |
| 15888 hsa-mir-24-2 | UBE2S    | 0.521922159 mirna_pc |
| 15889 hsa-mir-24-2 | PSMA4    | 0.430998634 mirna_pc |
| 15890 hsa-mir-24-2 | CCT5     | 0.396529 mirna_pc    |
| 15891 hsa-mir-24-2 | C11orf82 | 0.37295801 mirna_pc  |
| 15892 hsa-mir-24-2 | HNRNPC   | 0.495687374 mirna_pc |
| 15893 hsa-mir-24-2 | PPIA     | 0.618111343 mirna_pc |
| 15894 hsa-mir-24-2 | ILF2     | 0.398414927 mirna_pc |
| 15895 hsa-mir-24-2 | TCF3     | 0.320452815 mirna_pc |
| 15896 hsa-mir-24-2 | MCM5     | 0.338781781 mirna_pc |
| 15897 hsa-mir-24-2 | RAN      | 0.470755962 mirna_pc |
| 15898 hsa-mir-24-2 | TYMS     | 0.356273528 mirna_pc |
| 15899 hsa-mir-24-2 | LAD1     | 0.446398995 mirna_pc |
| 15900 hsa-mir-24-2 | RNASEH2A | 0.519357297 mirna_pc |
| 15901 hsa-mir-24-2 | EPR1     | 0.375305603 mirna_pc |
| 15902 hsa-mir-24-2 | H2AFX    | 0.38524109 mirna_pc  |
| 15903 hsa-mir-24-2 | SFRS2    | 0.354154796 mirna_pc |
| 15904 hsa-mir-24-2 | SH3BP1   | 0.495820669 mirna_pc |
| 15905 hsa-mir-24-2 | MTHFD1L  | 0.312061804 mirna_pc |
| 15906 hsa-mir-24-2 | PSMD14   | 0.345123351 mirna_pc |
| 15907 hsa-mir-24-2 | UCK2     | 0.343456653 mirna_pc |
| 15908 hsa-mir-24-2 | THOC4    | 0.427833173 mirna_pc |
| 15909 hsa-mir-24-2 | GLT25D1  | 0.353290673 mirna_pc |
| 15910 hsa-mir-24-2 | CENPN    | 0.321290804 mirna_pc |
| 15911 hsa-mir-24-2 | HMGB3    | 0.330505162 mirna_pc |
| 15912 hsa-mir-24-2 | RTKN     | 0.320506075 mirna_pc |
| 15913 hsa-mir-24-2 | RANBP1   | 0.473134372 mirna_pc |
| 15914 hsa-mir-24-2 | FAM83H   | 0.446945978 mirna_pc |
| 15915 hsa-mir-24-2 | SNRPG    | 0.456330195 mirna_pc |
| 15916 hsa-mir-24-2 | EIF4A3   | 0.512370296 mirna_pc |
| 15917 hsa-mir-24-2 | SNRPA    | 0.431873208 mirna_pc |
| 15918 hsa-mir-24-2 | FUS      | 0.435335356 mirna_pc |
| 15919 hsa-mir-24-2 | CENPW    | 0.491355649 mirna_pc |
| 15920 hsa-mir-24-2 | DNAJC9   | 0.403479905 mirna_pc |
| 15921 hsa-mir-24-2 | TUBA1C   | 0.553503377 mirna_pc |
| 15922 hsa-mir-24-2 | CHAF1A   | 0.387235049 mirna_pc |
| 15923 hsa-mir-24-2 | PSMD11   | 0.394140684 mirna_pc |
| 15924 hsa-mir-24-2 | NUDT1    | 0.515435462 mirna_pc |
| 15925 hsa-mir-24-2 | CCT3     | 0.320979443 mirna_pc |
| 15926 hsa-mir-24-2 | GINS2    | 0.425749341 mirna_pc |
| 15927 hsa-mir-24-2 | PSMA3    | 0.343147566 mirna_pc |
| 15928 hsa-mir-24-2 | TEAD4    | 0.340906007 mirna_pc |
| 15929 hsa-mir-24-2 | SNRPD1   | 0.332722824 mirna_pc |

|                    |           |                      |
|--------------------|-----------|----------------------|
| 15930 hsa-mir-24-2 | S100A11   | 0.532306383 mirna_pc |
| 15931 hsa-mir-24-2 | CDCA4     | 0.536708919 mirna_pc |
| 15932 hsa-mir-24-2 | ATP1B3    | 0.410015106 mirna_pc |
| 15933 hsa-mir-24-2 | MYO1B     | 0.323833085 mirna_pc |
| 15934 hsa-mir-24-2 | C16orf75  | 0.333635845 mirna_pc |
| 15935 hsa-mir-24-2 | EBNA1BP2  | 0.487371051 mirna_pc |
| 15936 hsa-mir-24-2 | C18orf56  | 0.401205976 mirna_pc |
| 15937 hsa-mir-24-2 | CFL1      | 0.446758837 mirna_pc |
| 15938 hsa-mir-24-2 | NOP2      | 0.32463835 mirna_pc  |
| 15939 hsa-mir-24-2 | HIST1H2AE | 0.348562103 mirna_pc |
| 15940 hsa-mir-24-2 | STX6      | 0.355551996 mirna_pc |
| 15941 hsa-mir-24-2 | CDK4      | 0.320961686 mirna_pc |
| 15942 hsa-mir-24-2 | FAM110A   | 0.376846061 mirna_pc |
| 15943 hsa-mir-24-2 | TACSTD2   | 0.332864868 mirna_pc |
| 15944 hsa-mir-24-2 | TYMP      | 0.317501247 mirna_pc |
| 15945 hsa-mir-24-2 | PFDN2     | 0.484194669 mirna_pc |
| 15946 hsa-mir-24-2 | C7orf11   | 0.42865845 mirna_pc  |
| 15947 hsa-mir-24-2 | CHTF18    | 0.320219828 mirna_pc |
| 15948 hsa-mir-24-2 | ENO1      | 0.530894745 mirna_pc |
| 15949 hsa-mir-24-2 | LAMC2     | 0.31893702 mirna_pc  |
| 15950 hsa-mir-24-2 | YIF1B     | 0.32313174 mirna_pc  |
| 15951 hsa-mir-24-2 | CENPH     | 0.412434706 mirna_pc |
| 15952 hsa-mir-24-2 | TCOF1     | 0.325349464 mirna_pc |
| 15953 hsa-mir-24-2 | ACYP1     | 0.343750276 mirna_pc |
| 15954 hsa-mir-24-2 | TMSB10    | 0.502774394 mirna_pc |
| 15955 hsa-mir-24-2 | ULBP2     | 0.475817344 mirna_pc |
| 15956 hsa-mir-24-2 | G3BP1     | 0.370818428 mirna_pc |
| 15957 hsa-mir-24-2 | TOMM40    | 0.338560239 mirna_pc |
| 15958 hsa-mir-24-2 | F12       | 0.475169417 mirna_pc |
| 15959 hsa-mir-24-2 | GAMT      | 0.326634076 mirna_pc |
| 15960 hsa-mir-24-2 | YDJC      | 0.403594989 mirna_pc |
| 15961 hsa-mir-24-2 | TMEM189   | 0.51186384 mirna_pc  |
| 15962 hsa-mir-24-2 | ARL6IP6   | 0.322205477 mirna_pc |
| 15963 hsa-mir-24-2 | PKP3      | 0.338504725 mirna_pc |
| 15964 hsa-mir-24-2 | HAUS8     | 0.374118165 mirna_pc |
| 15965 hsa-mir-24-2 | TMEM41A   | 0.316447519 mirna_pc |
| 15966 hsa-mir-24-2 | PSMB4     | 0.308744263 mirna_pc |
| 15967 hsa-mir-24-2 | RFC4      | 0.417603114 mirna_pc |
| 15968 hsa-mir-24-2 | BRIX1     | 0.332015639 mirna_pc |
| 15969 hsa-mir-24-2 | SF3B14    | 0.435994689 mirna_pc |
| 15970 hsa-mir-24-2 | EFNB1     | 0.392231625 mirna_pc |
| 15971 hsa-mir-24-2 | MKI67IP   | 0.303232843 mirna_pc |
| 15972 hsa-mir-24-2 | CAPZA1    | 0.31796797 mirna_pc  |
| 15973 hsa-mir-24-2 | ACOT7     | 0.375022242 mirna_pc |
| 15974 hsa-mir-24-2 | ANXA2     | 0.353091765 mirna_pc |
| 15975 hsa-mir-24-2 | H2AFZ     | 0.431522675 mirna_pc |
| 15976 hsa-mir-24-2 | NRM       | 0.381531227 mirna_pc |
| 15977 hsa-mir-24-2 | MAGOH     | 0.397323746 mirna_pc |
| 15978 hsa-mir-24-2 | NUP37     | 0.448912615 mirna_pc |
| 15979 hsa-mir-24-2 | LDHA      | 0.515020342 mirna_pc |
| 15980 hsa-mir-24-2 | CPSF3     | 0.316692908 mirna_pc |
| 15981 hsa-mir-24-2 | BANF1     | 0.491633477 mirna_pc |
| 15982 hsa-mir-24-2 | DCAF15    | 0.457725631 mirna_pc |
| 15983 hsa-mir-24-2 | SNRPE     | 0.356067099 mirna_pc |

|                    |          |                      |
|--------------------|----------|----------------------|
| 15984 hsa-mir-24-2 | SLC2A1   | 0.379022084 mirna_pc |
| 15985 hsa-mir-24-2 | PYCARD   | 0.437801545 mirna_pc |
| 15986 hsa-mir-24-2 | PPM1G    | 0.464536596 mirna_pc |
| 15987 hsa-mir-24-2 | SDC1     | 0.536129789 mirna_pc |
| 15988 hsa-mir-24-2 | SNRPD2   | 0.412725937 mirna_pc |
| 15989 hsa-mir-24-2 | PLAU     | 0.31351646 mirna_pc  |
| 15990 hsa-mir-24-2 | MDFI     | 0.410002493 mirna_pc |
| 15991 hsa-mir-24-2 | NPM3     | 0.434365308 mirna_pc |
| 15992 hsa-mir-24-2 | SIP1     | 0.306247789 mirna_pc |
| 15993 hsa-mir-24-2 | NUDT5    | 0.405177684 mirna_pc |
| 15994 hsa-mir-24-2 | APEX2    | 0.388394209 mirna_pc |
| 15995 hsa-mir-24-2 | CDH3     | 0.393011838 mirna_pc |
| 15996 hsa-mir-24-2 | NUTF2    | 0.375404962 mirna_pc |
| 15997 hsa-mir-24-2 | RNPS1    | 0.458247633 mirna_pc |
| 15998 hsa-mir-24-2 | DAZAP1   | 0.476018699 mirna_pc |
| 15999 hsa-mir-24-2 | BOLA2    | 0.415589867 mirna_pc |
| 16000 hsa-mir-24-2 | PSMA6    | 0.327529653 mirna_pc |
| 16001 hsa-mir-24-2 | TXNDC9   | 0.331068835 mirna_pc |
| 16002 hsa-mir-24-2 | C10orf55 | 0.458745781 mirna_pc |
| 16003 hsa-mir-24-2 | TMEM201  | 0.347378763 mirna_pc |
| 16004 hsa-mir-24-2 | MRPL9    | 0.332044298 mirna_pc |
| 16005 hsa-mir-24-2 | DCTPP1   | 0.352021027 mirna_pc |
| 16006 hsa-mir-24-2 | DGUOK    | 0.437228587 mirna_pc |
| 16007 hsa-mir-24-2 | MRPL47   | 0.438799531 mirna_pc |
| 16008 hsa-mir-24-2 | DPP3     | 0.360583821 mirna_pc |
| 16009 hsa-mir-24-2 | S100A3   | 0.37107244 mirna_pc  |
| 16010 hsa-mir-24-2 | STIP1    | 0.392621723 mirna_pc |
| 16011 hsa-mir-24-2 | HIST1H1E | 0.352308147 mirna_pc |
| 16012 hsa-mir-24-2 | PSMG3    | 0.435188867 mirna_pc |
| 16013 hsa-mir-24-2 | THOP1    | 0.530150408 mirna_pc |
| 16014 hsa-mir-24-2 | EXOSC5   | 0.328412874 mirna_pc |
| 16015 hsa-mir-24-2 | SCNM1    | 0.404347708 mirna_pc |
| 16016 hsa-mir-24-2 | ANXA2P2  | 0.35110629 mirna_pc  |
| 16017 hsa-mir-24-2 | BCAP31   | 0.355715642 mirna_pc |
| 16018 hsa-mir-24-2 | RELL2    | 0.324645791 mirna_pc |
| 16019 hsa-mir-24-2 | PRCC     | 0.325233289 mirna_pc |
| 16020 hsa-mir-24-2 | SET      | 0.31937607 mirna_pc  |
| 16021 hsa-mir-24-2 | POLR2H   | 0.305073888 mirna_pc |
| 16022 hsa-mir-24-2 | NIP7     | 0.300769321 mirna_pc |
| 16023 hsa-mir-24-2 | SERPINB5 | 0.358655634 mirna_pc |
| 16024 hsa-mir-24-2 | NR2C2AP  | 0.418006301 mirna_pc |
| 16025 hsa-mir-24-2 | C3orf26  | 0.321588644 mirna_pc |
| 16026 hsa-mir-24-2 | MRT04    | 0.455202797 mirna_pc |
| 16027 hsa-mir-24-2 | LSM 7.00 | 0.437897842 mirna_pc |
| 16028 hsa-mir-24-2 | SCD      | 0.351906384 mirna_pc |
| 16029 hsa-mir-24-2 | FLAD1    | 0.411049152 mirna_pc |
| 16030 hsa-mir-24-2 | NUP93    | 0.327231273 mirna_pc |
| 16031 hsa-mir-24-2 | POLE3    | 0.352938813 mirna_pc |
| 16032 hsa-mir-24-2 | PPIH     | 0.393893948 mirna_pc |
| 16033 hsa-mir-24-2 | THOC6    | 0.427001603 mirna_pc |
| 16034 hsa-mir-24-2 | GMPS     | 0.41201475 mirna_pc  |
| 16035 hsa-mir-24-2 | C3orf37  | 0.349114318 mirna_pc |
| 16036 hsa-mir-24-2 | MRPL3    | 0.321528599 mirna_pc |
| 16037 hsa-mir-24-2 | EIF5A    | 0.613988886 mirna_pc |

|       |              |              |             |          |
|-------|--------------|--------------|-------------|----------|
| 16038 | hsa-mir-24-2 | GNB1L        | 0.385853636 | mirna_pc |
| 16039 | hsa-mir-24-2 | PPP4C        | 0.41114869  | mirna_pc |
| 16040 | hsa-mir-24-2 | SMYD5        | 0.320881229 | mirna_pc |
| 16041 | hsa-mir-24-2 | SF3A2        | 0.509876866 | mirna_pc |
| 16042 | hsa-mir-24-2 | TSSC1        | 0.396870541 | mirna_pc |
| 16043 | hsa-mir-24-2 | REEP4        | 0.557257354 | mirna_pc |
| 16044 | hsa-mir-24-2 | PFN1         | 0.478153082 | mirna_pc |
| 16045 | hsa-mir-24-2 | BOP 1.00     | 0.392746832 | mirna_pc |
| 16046 | hsa-mir-24-2 | POLA2        | 0.301808007 | mirna_pc |
| 16047 | hsa-mir-24-2 | SFN          | 0.55014909  | mirna_pc |
| 16048 | hsa-mir-24-2 | SNRPF        | 0.476219636 | mirna_pc |
| 16049 | hsa-mir-24-2 | SUMO2        | 0.505735336 | mirna_pc |
| 16050 | hsa-mir-24-2 | BCL11B       | 0.30108768  | mirna_pc |
| 16051 | hsa-mir-24-2 | CTSC         | 0.348469842 | mirna_pc |
| 16052 | hsa-mir-24-2 | CDH24        | 0.347953314 | mirna_pc |
| 16053 | hsa-mir-24-2 | SNRPA1       | 0.39569713  | mirna_pc |
| 16054 | hsa-mir-24-2 | SKP2         | 0.317736178 | mirna_pc |
| 16055 | hsa-mir-24-2 | NME2         | 0.408179569 | mirna_pc |
| 16056 | hsa-mir-24-2 | UBE2I        | 0.50555965  | mirna_pc |
| 16057 | hsa-mir-24-2 | GSTP1        | 0.449441798 | mirna_pc |
| 16058 | hsa-mir-24-2 | YWHAZ        | 0.335402175 | mirna_pc |
| 16059 | hsa-mir-24-2 | TIPIN        | 0.428430831 | mirna_pc |
| 16060 | hsa-mir-24-2 | KCTD5        | 0.342563606 | mirna_pc |
| 16061 | hsa-mir-24-2 | CYP27B1      | 0.323832485 | mirna_pc |
| 16062 | hsa-mir-24-2 | NDUFS4       | 0.332065552 | mirna_pc |
| 16063 | hsa-mir-24-2 | POLD2        | 0.460415544 | mirna_pc |
| 16064 | hsa-mir-24-2 | ATXN2L       | 0.322186843 | mirna_pc |
| 16065 | hsa-mir-24-2 | AGTRAP       | 0.35859297  | mirna_pc |
| 16066 | hsa-mir-24-2 | H2AFY        | 0.313131326 | mirna_pc |
| 16067 | hsa-mir-24-2 | ECE2         | 0.5340312   | mirna_pc |
| 16068 | hsa-mir-24-2 | GPN1         | 0.360641887 | mirna_pc |
| 16069 | hsa-mir-24-2 | RFC5         | 0.329171538 | mirna_pc |
| 16070 | hsa-mir-24-2 | PPP1CA       | 0.480941786 | mirna_pc |
| 16071 | hsa-mir-24-2 | MAZ          | 0.374570216 | mirna_pc |
| 16072 | hsa-mir-24-2 | RANGAP1      | 0.430954099 | mirna_pc |
| 16073 | hsa-mir-24-2 | SSRP1        | 0.380055578 | mirna_pc |
| 16074 | hsa-mir-24-2 | SLBP         | 0.305213285 | mirna_pc |
| 16075 | hsa-mir-24-2 | COL7A1       | 0.322474117 | mirna_pc |
| 16076 | hsa-mir-24-2 | PA2G4        | 0.43780239  | mirna_pc |
| 16077 | hsa-mir-24-2 | SNRPD3       | 0.534283976 | mirna_pc |
| 16078 | hsa-mir-24-2 | CAPG         | 0.304305558 | mirna_pc |
| 16079 | hsa-mir-24-2 | KHDRBS1      | 0.327979705 | mirna_pc |
| 16080 | hsa-mir-24-2 | C20orf27     | 0.329787577 | mirna_pc |
| 16081 | hsa-mir-24-2 | LOC92659     | 0.373795686 | mirna_pc |
| 16082 | hsa-mir-24-2 | FSCN1        | 0.526558439 | mirna_pc |
| 16083 | hsa-mir-24-2 | GGH          | 0.381274938 | mirna_pc |
| 16084 | hsa-mir-24-2 | TMEM138      | 0.30184157  | mirna_pc |
| 16085 | hsa-mir-24-2 | PYCRL        | 0.405276468 | mirna_pc |
| 16086 | hsa-mir-24-2 | B3GNT5       | 0.334437706 | mirna_pc |
| 16087 | hsa-mir-24-2 | LOC100130776 | 0.496178337 | mirna_pc |
| 16088 | hsa-mir-24-2 | ALG1L        | 0.328365978 | mirna_pc |
| 16089 | hsa-mir-24-2 | CCT7         | 0.482007779 | mirna_pc |
| 16090 | hsa-mir-24-2 | UBE2A        | 0.306054597 | mirna_pc |
| 16091 | hsa-mir-24-2 | MTERFD1      | 0.326745898 | mirna_pc |

|                    |          |                      |
|--------------------|----------|----------------------|
| 16092 hsa-mir-24-2 | HOXC13   | 0.350176381 mirna_pc |
| 16093 hsa-mir-24-2 | SNRNP40  | 0.405872037 mirna_pc |
| 16094 hsa-mir-24-2 | ITGB4    | 0.36928426 mirna_pc  |
| 16095 hsa-mir-24-2 | HES1     | 0.348139766 mirna_pc |
| 16096 hsa-mir-24-2 | MED30    | 0.368282492 mirna_pc |
| 16097 hsa-mir-24-2 | METTL1   | 0.336976936 mirna_pc |
| 16098 hsa-mir-24-2 | FAM174A  | 0.30564971 mirna_pc  |
| 16099 hsa-mir-24-2 | TMEM69   | 0.532883475 mirna_pc |
| 16100 hsa-mir-24-2 | GINS3    | 0.389626121 mirna_pc |
| 16101 hsa-mir-24-2 | AP2S1    | 0.462611996 mirna_pc |
| 16102 hsa-mir-24-2 | DCTN2    | 0.315514871 mirna_pc |
| 16103 hsa-mir-24-2 | NSUN5    | 0.310674769 mirna_pc |
| 16104 hsa-mir-24-2 | JUB      | 0.327412288 mirna_pc |
| 16105 hsa-mir-24-2 | PVRL1    | 0.496156563 mirna_pc |
| 16106 hsa-mir-24-2 | BRMS1    | 0.313214335 mirna_pc |
| 16107 hsa-mir-24-2 | CCDC137  | 0.410813544 mirna_pc |
| 16108 hsa-mir-24-2 | SREBF1   | 0.365995429 mirna_pc |
| 16109 hsa-mir-24-2 | KRI1     | 0.372807865 mirna_pc |
| 16110 hsa-mir-24-2 | NOC2L    | 0.330421102 mirna_pc |
| 16111 hsa-mir-24-2 | RPP40    | 0.408751133 mirna_pc |
| 16112 hsa-mir-24-2 | LAGE3    | 0.304581928 mirna_pc |
| 16113 hsa-mir-24-2 | CCDC86   | 0.52220704 mirna_pc  |
| 16114 hsa-mir-24-2 | ZC3H3    | 0.402291829 mirna_pc |
| 16115 hsa-mir-24-2 | USP39    | 0.348396768 mirna_pc |
| 16116 hsa-mir-24-2 | LSM 4.00 | 0.455903647 mirna_pc |
| 16117 hsa-mir-24-2 | PSMB1    | 0.425772065 mirna_pc |
| 16118 hsa-mir-24-2 | DENR     | 0.32196153 mirna_pc  |
| 16119 hsa-mir-24-2 | EXOSC2   | 0.310957363 mirna_pc |
| 16120 hsa-mir-24-2 | TRIM29   | 0.407603652 mirna_pc |
| 16121 hsa-mir-24-2 | DUSP11   | 0.440132764 mirna_pc |
| 16122 hsa-mir-24-2 | C11orf84 | 0.310769625 mirna_pc |
| 16123 hsa-mir-24-2 | KRT17    | 0.472689477 mirna_pc |
| 16124 hsa-mir-24-2 | TOP1MT   | 0.409517522 mirna_pc |
| 16125 hsa-mir-24-2 | TBCE     | 0.319142944 mirna_pc |
| 16126 hsa-mir-24-2 | GAPDH    | 0.509936986 mirna_pc |
| 16127 hsa-mir-24-2 | LRRC8D   | 0.336523024 mirna_pc |
| 16128 hsa-mir-24-2 | KLF16    | 0.337107184 mirna_pc |
| 16129 hsa-mir-24-2 | FBX0220S | 0.468048703 mirna_pc |
| 16130 hsa-mir-24-2 | CARM1    | 0.356929688 mirna_pc |
| 16131 hsa-mir-24-2 | SLC3A2   | 0.548911668 mirna_pc |
| 16132 hsa-mir-24-2 | DDX49    | 0.44306408 mirna_pc  |
| 16133 hsa-mir-24-2 | DPY30    | 0.436563017 mirna_pc |
| 16134 hsa-mir-24-2 | RRP9     | 0.306796677 mirna_pc |
| 16135 hsa-mir-24-2 | TUBB2C   | 0.37044148 mirna_pc  |
| 16136 hsa-mir-24-2 | MTCH2    | 0.353401043 mirna_pc |
| 16137 hsa-mir-24-2 | EIF5AL1  | 0.570299368 mirna_pc |
| 16138 hsa-mir-24-2 | S100A10  | 0.350184732 mirna_pc |
| 16139 hsa-mir-24-2 | CCDC109B | 0.347770675 mirna_pc |
| 16140 hsa-mir-24-2 | MEN1     | 0.439319219 mirna_pc |
| 16141 hsa-mir-24-2 | C17orf49 | 0.446887704 mirna_pc |
| 16142 hsa-mir-24-2 | PLEKHG5  | 0.349740704 mirna_pc |
| 16143 hsa-mir-24-2 | HIFX     | 0.323314913 mirna_pc |
| 16144 hsa-mir-24-2 | CCT4     | 0.46073088 mirna_pc  |
| 16145 hsa-mir-24-2 | SAC3D1   | 0.534484765 mirna_pc |

|                    |           |                      |
|--------------------|-----------|----------------------|
| 16146 hsa-mir-24-2 | RABEPK    | 0.417306626 mirna_pc |
| 16147 hsa-mir-24-2 | PRICKLE3  | 0.528399526 mirna_pc |
| 16148 hsa-mir-24-2 | ELAVL1    | 0.368617748 mirna_pc |
| 16149 hsa-mir-24-2 | MRPL4     | 0.496725838 mirna_pc |
| 16150 hsa-mir-24-2 | WDR18     | 0.501688734 mirna_pc |
| 16151 hsa-mir-24-2 | CENPP     | 0.336815707 mirna_pc |
| 16152 hsa-mir-24-2 | MIF       | 0.593049926 mirna_pc |
| 16153 hsa-mir-24-2 | RAC1      | 0.337694231 mirna_pc |
| 16154 hsa-mir-24-2 | ARPC3     | 0.403842861 mirna_pc |
| 16155 hsa-mir-24-2 | TFAP2A    | 0.44125663 mirna_pc  |
| 16156 hsa-mir-24-2 | EIF4A1    | 0.547805457 mirna_pc |
| 16157 hsa-mir-24-2 | TRMT1     | 0.389051314 mirna_pc |
| 16158 hsa-mir-24-2 | NAE1      | 0.323952715 mirna_pc |
| 16159 hsa-mir-24-2 | PPP1R13L  | 0.327433407 mirna_pc |
| 16160 hsa-mir-24-2 | PSMC3IP   | 0.3086439 mirna_pc   |
| 16161 hsa-mir-24-2 | TBC1D7    | 0.416422216 mirna_pc |
| 16162 hsa-mir-24-2 | TNFAIP8L1 | 0.337798773 mirna_pc |
| 16163 hsa-mir-24-2 | PPP1R14B  | 0.575424206 mirna_pc |
| 16164 hsa-mir-24-2 | IFI27     | 0.301642785 mirna_pc |
| 16165 hsa-mir-24-2 | C10orf116 | 0.329655168 mirna_pc |
| 16166 hsa-mir-24-2 | PES 1.00  | 0.330423162 mirna_pc |
| 16167 hsa-mir-24-2 | PSMB7     | 0.447390528 mirna_pc |
| 16168 hsa-mir-24-2 | E2F4      | 0.329049289 mirna_pc |
| 16169 hsa-mir-24-2 | GJB3      | 0.554711438 mirna_pc |
| 16170 hsa-mir-24-2 | C12orf56  | 0.302278645 mirna_pc |
| 16171 hsa-mir-24-2 | TRMT112   | 0.574301097 mirna_pc |
| 16172 hsa-mir-24-2 | PKM2      | 0.508026077 mirna_pc |
| 16173 hsa-mir-24-2 | TMEM102   | 0.308557247 mirna_pc |
| 16174 hsa-mir-24-2 | STAP2     | 0.399044991 mirna_pc |
| 16175 hsa-mir-24-2 | PSMD2     | 0.442428688 mirna_pc |
| 16176 hsa-mir-24-2 | PGAM5     | 0.373358341 mirna_pc |
| 16177 hsa-mir-24-2 | PMAIP1    | 0.307930593 mirna_pc |
| 16178 hsa-mir-24-2 | YWHAE     | 0.473154202 mirna_pc |
| 16179 hsa-mir-24-2 | KDM1A     | 0.314586657 mirna_pc |
| 16180 hsa-mir-24-2 | FOXDI     | 0.326670921 mirna_pc |
| 16181 hsa-mir-24-2 | NAA10     | 0.389893779 mirna_pc |
| 16182 hsa-mir-24-2 | TBCB      | 0.311697045 mirna_pc |
| 16183 hsa-mir-24-2 | PGF       | 0.419935072 mirna_pc |
| 16184 hsa-mir-24-2 | FBXL19    | 0.325504643 mirna_pc |
| 16185 hsa-mir-24-2 | YARS2     | 0.325809277 mirna_pc |
| 16186 hsa-mir-24-2 | PUF60     | 0.413141417 mirna_pc |
| 16187 hsa-mir-24-2 | ADRB2     | 0.350323266 mirna_pc |
| 16188 hsa-mir-24-2 | MAPK6     | 0.426018711 mirna_pc |
| 16189 hsa-mir-24-2 | TM4SF19   | 0.37793213 mirna_pc  |
| 16190 hsa-mir-24-2 | SFRS9     | 0.458013993 mirna_pc |
| 16191 hsa-mir-24-2 | GLRX3     | 0.474286101 mirna_pc |
| 16192 hsa-mir-24-2 | NCLN      | 0.384912303 mirna_pc |
| 16193 hsa-mir-24-2 | NMB       | 0.377159584 mirna_pc |
| 16194 hsa-mir-24-2 | OLA1      | 0.337068014 mirna_pc |
| 16195 hsa-mir-24-2 | C7orf70   | 0.37785021 mirna_pc  |
| 16196 hsa-mir-24-2 | C14orf80  | 0.378897312 mirna_pc |
| 16197 hsa-mir-24-2 | AHSA1     | 0.326418317 mirna_pc |
| 16198 hsa-mir-24-2 | ADORA2B   | 0.378568408 mirna_pc |
| 16199 hsa-mir-24-2 | MAD1L1    | 0.324961473 mirna_pc |



|                    |            |                      |
|--------------------|------------|----------------------|
| 16200 hsa-mir-24-2 | KHSRP      | 0.396715181 mirna_pc |
| 16201 hsa-mir-24-2 | SH2D5      | 0.47291315 mirna_pc  |
| 16202 hsa-mir-24-2 | FTSJ1      | 0.356120883 mirna_pc |
| 16203 hsa-mir-24-2 | THOC3      | 0.402820009 mirna_pc |
| 16204 hsa-mir-24-2 | TKT        | 0.384288862 mirna_pc |
| 16205 hsa-mir-24-2 | ARMC6      | 0.328447853 mirna_pc |
| 16206 hsa-mir-24-2 | MRPS17     | 0.343158789 mirna_pc |
| 16207 hsa-mir-24-2 | TNFRSF18   | 0.409905867 mirna_pc |
| 16208 hsa-mir-24-2 | PERP       | 0.531080675 mirna_pc |
| 16209 hsa-mir-24-2 | C7orf27    | 0.321679186 mirna_pc |
| 16210 hsa-mir-24-2 | WDR74      | 0.43141355 mirna_pc  |
| 16211 hsa-mir-24-2 | AKIRIN2    | 0.347275411 mirna_pc |
| 16212 hsa-mir-24-2 | HIST2H2AA3 | 0.371405858 mirna_pc |
| 16213 hsa-mir-24-2 | PRDX1      | 0.428446627 mirna_pc |
| 16214 hsa-mir-24-2 | MREG       | 0.335829328 mirna_pc |
| 16215 hsa-mir-24-2 | POLR2G     | 0.423150393 mirna_pc |
| 16216 hsa-mir-24-2 | PSMB5      | 0.421698173 mirna_pc |
| 16217 hsa-mir-24-2 | PLP2       | 0.592813558 mirna_pc |
| 16218 hsa-mir-24-2 | TPST2      | 0.306112397 mirna_pc |
| 16219 hsa-mir-24-2 | PSMD4      | 0.40781852 mirna_pc  |
| 16220 hsa-mir-24-2 | NUP188     | 0.360384969 mirna_pc |
| 16221 hsa-mir-24-2 | FARSA      | 0.429458798 mirna_pc |
| 16222 hsa-mir-24-2 | RUSC1      | 0.367947439 mirna_pc |
| 16223 hsa-mir-24-2 | C15orf23   | 0.30426262 mirna_pc  |
| 16224 hsa-mir-24-2 | NIT2       | 0.318244733 mirna_pc |
| 16225 hsa-mir-24-2 | GJB2       | 0.315965493 mirna_pc |
| 16226 hsa-mir-24-2 | PLEKHN1    | 0.311951923 mirna_pc |
| 16227 hsa-mir-24-2 | ANAPC7     | 0.381008073 mirna_pc |
| 16228 hsa-mir-24-2 | CIRH1A     | 0.384886007 mirna_pc |
| 16229 hsa-mir-24-2 | PRMT3      | 0.309806531 mirna_pc |
| 16230 hsa-mir-24-2 | C3orf21    | 0.356078556 mirna_pc |
| 16231 hsa-mir-24-2 | PSMD12     | 0.350203814 mirna_pc |
| 16232 hsa-mir-24-2 | S100A16    | 0.317405191 mirna_pc |
| 16233 hsa-mir-24-2 | C22orf9    | 0.35832841 mirna_pc  |
| 16234 hsa-mir-24-2 | ZNF668     | 0.461351258 mirna_pc |
| 16235 hsa-mir-24-2 | DIABLO     | 0.343790254 mirna_pc |
| 16236 hsa-mir-24-2 | OVOL1      | 0.390038856 mirna_pc |
| 16237 hsa-mir-24-2 | CD276      | 0.321909854 mirna_pc |
| 16238 hsa-mir-24-2 | LRRC42     | 0.406839676 mirna_pc |
| 16239 hsa-mir-24-2 | CIQBP      | 0.419876664 mirna_pc |
| 16240 hsa-mir-24-2 | MRPL17     | 0.328094349 mirna_pc |
| 16241 hsa-mir-24-2 | RAD23B     | 0.360235767 mirna_pc |
| 16242 hsa-mir-24-2 | GPI        | 0.35743006 mirna_pc  |
| 16243 hsa-mir-24-2 | C19orf47   | 0.345461371 mirna_pc |
| 16244 hsa-mir-24-2 | NSDHL      | 0.31670785 mirna_pc  |
| 16245 hsa-mir-24-2 | XRCC3      | 0.345224902 mirna_pc |
| 16246 hsa-mir-24-2 | PDCD6      | 0.342677486 mirna_pc |
| 16247 hsa-mir-24-2 | GJB4       | 0.468514184 mirna_pc |
| 16248 hsa-mir-24-2 | TUBG1      | 0.478606162 mirna_pc |
| 16249 hsa-mir-24-2 | C16orf80   | 0.377376728 mirna_pc |
| 16250 hsa-mir-24-2 | PRRG4      | 0.364850862 mirna_pc |
| 16251 hsa-mir-24-2 | PVRL4      | 0.357578527 mirna_pc |
| 16252 hsa-mir-24-2 | ORMDL2     | 0.489518578 mirna_pc |
| 16253 hsa-mir-24-2 | VPS72      | 0.303116685 mirna_pc |

|                    |           |                      |
|--------------------|-----------|----------------------|
| 16254 hsa-mir-24-2 | EIF4EBP1  | 0.490852035 mirna_pc |
| 16255 hsa-mir-24-2 | NACC1     | 0.387140428 mirna_pc |
| 16256 hsa-mir-24-2 | ATAD3A    | 0.349706778 mirna_pc |
| 16257 hsa-mir-24-2 | TXN       | 0.361064437 mirna_pc |
| 16258 hsa-mir-24-2 | SHMT2     | 0.307428761 mirna_pc |
| 16259 hsa-mir-24-2 | C1orf172  | 0.365813929 mirna_pc |
| 16260 hsa-mir-24-2 | MRPL12    | 0.452090094 mirna_pc |
| 16261 hsa-mir-24-2 | RAP2B     | 0.385343749 mirna_pc |
| 16262 hsa-mir-24-2 | EMG1      | 0.409216087 mirna_pc |
| 16263 hsa-mir-24-2 | CSNK1E    | 0.380463935 mirna_pc |
| 16264 hsa-mir-24-2 | IFI27L2   | 0.446106044 mirna_pc |
| 16265 hsa-mir-24-2 | HAUS1     | 0.317453243 mirna_pc |
| 16266 hsa-mir-24-2 | PA2G4P4   | 0.470730488 mirna_pc |
| 16267 hsa-mir-24-2 | WDR53     | 0.416676414 mirna_pc |
| 16268 hsa-mir-24-2 | ALOX12P2  | 0.359275502 mirna_pc |
| 16269 hsa-mir-24-2 | RNF7      | 0.466912879 mirna_pc |
| 16270 hsa-mir-24-2 | CNIH4     | 0.391654876 mirna_pc |
| 16271 hsa-mir-24-2 | WDR54     | 0.348005473 mirna_pc |
| 16272 hsa-mir-24-2 | SLC10A3   | 0.398303936 mirna_pc |
| 16273 hsa-mir-24-2 | LOC728554 | 0.324458397 mirna_pc |
| 16274 hsa-mir-24-2 | AK2       | 0.319890713 mirna_pc |
| 16275 hsa-mir-24-2 | TBC1D10B  | 0.337569539 mirna_pc |
| 16276 hsa-mir-24-2 | RPL26L1   | 0.464552387 mirna_pc |
| 16277 hsa-mir-24-2 | H3F3B     | 0.403421957 mirna_pc |
| 16278 hsa-mir-24-2 | MRPL11    | 0.334440463 mirna_pc |
| 16279 hsa-mir-24-2 | TSPAN14   | 0.326732623 mirna_pc |
| 16280 hsa-mir-24-2 | DUT       | 0.370543694 mirna_pc |
| 16281 hsa-mir-24-2 | ANKRD39   | 0.329986842 mirna_pc |
| 16282 hsa-mir-24-2 | AP2M1     | 0.42635682 mirna_pc  |
| 16283 hsa-mir-24-2 | HN1L      | 0.36836171 mirna_pc  |
| 16284 hsa-mir-24-2 | CLSTN1    | 0.367673982 mirna_pc |
| 16285 hsa-mir-24-2 | PCGF1     | 0.535112865 mirna_pc |
| 16286 hsa-mir-24-2 | GJA3      | 0.304738888 mirna_pc |
| 16287 hsa-mir-24-2 | SERINC2   | 0.307247723 mirna_pc |
| 16288 hsa-mir-24-2 | COX4NB    | 0.383026878 mirna_pc |
| 16289 hsa-mir-24-2 | STUB1     | 0.391314063 mirna_pc |
| 16290 hsa-mir-24-2 | RPS6KA4   | 0.370967544 mirna_pc |
| 16291 hsa-mir-24-2 | POLR3G    | 0.337744437 mirna_pc |
| 16292 hsa-mir-24-2 | TYSND1    | 0.462839836 mirna_pc |
| 16293 hsa-mir-24-2 | HOXD11    | 0.409865404 mirna_pc |
| 16294 hsa-mir-24-2 | C3orf34   | 0.382000458 mirna_pc |
| 16295 hsa-mir-24-2 | TPRKB     | 0.363156186 mirna_pc |
| 16296 hsa-mir-24-2 | SRM       | 0.470847264 mirna_pc |
| 16297 hsa-mir-24-2 | TCEB1     | 0.409501729 mirna_pc |
| 16298 hsa-mir-24-2 | XRCC6     | 0.383605614 mirna_pc |
| 16299 hsa-mir-24-2 | TAF6L     | 0.348938228 mirna_pc |
| 16300 hsa-mir-24-2 | MRPL18    | 0.394238116 mirna_pc |
| 16301 hsa-mir-24-2 | BCKDK     | 0.301769609 mirna_pc |
| 16302 hsa-mir-24-2 | FANCE     | 0.443926185 mirna_pc |
| 16303 hsa-mir-24-2 | PSMG1     | 0.44342192 mirna_pc  |
| 16304 hsa-mir-24-2 | PPP1R8    | 0.422310937 mirna_pc |
| 16305 hsa-mir-24-2 | NPM1      | 0.482981152 mirna_pc |
| 16306 hsa-mir-24-2 | CDK2AP1   | 0.450921836 mirna_pc |
| 16307 hsa-mir-24-2 | ANKRD13B  | 0.307886898 mirna_pc |

|                    |          |                      |
|--------------------|----------|----------------------|
| 16308 hsa-mir-24-2 | C19orf22 | 0.409681371 mirna_pc |
| 16309 hsa-mir-24-2 | UPP1     | 0.390781918 mirna_pc |
| 16310 hsa-mir-24-2 | RGS20    | 0.473988309 mirna_pc |
| 16311 hsa-mir-24-2 | COQ2     | 0.333505217 mirna_pc |
| 16312 hsa-mir-24-2 | TPI1     | 0.58716384 mirna_pc  |
| 16313 hsa-mir-24-2 | ATP5J2   | 0.311051554 mirna_pc |
| 16314 hsa-mir-24-2 | MED19    | 0.416033519 mirna_pc |
| 16315 hsa-mir-24-2 | PPAN     | 0.411545264 mirna_pc |
| 16316 hsa-mir-24-2 | FXD3     | 0.344034025 mirna_pc |
| 16317 hsa-mir-24-2 | PSMA2    | 0.323075723 mirna_pc |
| 16318 hsa-mir-24-2 | OTUB1    | 0.465469709 mirna_pc |
| 16319 hsa-mir-24-2 | RFC2     | 0.43430719 mirna_pc  |
| 16320 hsa-mir-24-2 | WDR5     | 0.331671444 mirna_pc |
| 16321 hsa-mir-24-2 | GTPBP3   | 0.307608143 mirna_pc |
| 16322 hsa-mir-24-2 | KARS     | 0.323000065 mirna_pc |
| 16323 hsa-mir-24-2 | EXOSC4   | 0.560067574 mirna_pc |
| 16324 hsa-mir-24-2 | IL1A     | 0.335296754 mirna_pc |
| 16325 hsa-mir-24-2 | FAM58A   | 0.402426537 mirna_pc |
| 16326 hsa-mir-24-2 | C19orf24 | 0.508790854 mirna_pc |
| 16327 hsa-mir-24-2 | SLC25A39 | 0.404122985 mirna_pc |
| 16328 hsa-mir-24-2 | SCRIB    | 0.345303468 mirna_pc |
| 16329 hsa-mir-24-2 | CHST1    | 0.312660376 mirna_pc |
| 16330 hsa-mir-24-2 | ULBP3    | 0.326500624 mirna_pc |
| 16331 hsa-mir-24-2 | TSEN34   | 0.300237367 mirna_pc |
| 16332 hsa-mir-24-2 | MAD2L2   | 0.399500876 mirna_pc |
| 16333 hsa-mir-24-2 | CSNK1G2  | 0.365533357 mirna_pc |
| 16334 hsa-mir-24-2 | CD9      | 0.320201512 mirna_pc |
| 16335 hsa-mir-24-2 | POLR3K   | 0.343510628 mirna_pc |
| 16336 hsa-mir-24-2 | TMEM39B  | 0.36257584 mirna_pc  |
| 16337 hsa-mir-24-2 | SNAPC1   | 0.301336531 mirna_pc |
| 16338 hsa-mir-24-2 | NOP10    | 0.529310667 mirna_pc |
| 16339 hsa-mir-24-2 | RHOV     | 0.332571505 mirna_pc |
| 16340 hsa-mir-24-2 | TMEM161A | 0.309022915 mirna_pc |
| 16341 hsa-mir-24-2 | RPL28    | 0.303279234 mirna_pc |
| 16342 hsa-mir-24-2 | RPS2     | 0.439109012 mirna_pc |
| 16343 hsa-mir-24-2 | MRPL51   | 0.480005989 mirna_pc |
| 16344 hsa-mir-24-2 | C1orf35  | 0.378390269 mirna_pc |
| 16345 hsa-mir-24-2 | METRNL   | 0.3020087 mirna_pc   |
| 16346 hsa-mir-24-2 | CYB5R2   | 0.306324518 mirna_pc |
| 16347 hsa-mir-24-2 | FJX1     | 0.371763268 mirna_pc |
| 16348 hsa-mir-24-2 | CDKN2D   | 0.325406862 mirna_pc |
| 16349 hsa-mir-24-2 | SAMD1    | 0.344457225 mirna_pc |
| 16350 hsa-mir-24-2 | ZDHHC12  | 0.411329227 mirna_pc |
| 16351 hsa-mir-24-2 | TPRXL    | 0.408616588 mirna_pc |
| 16352 hsa-mir-24-2 | ERI3     | 0.394064724 mirna_pc |
| 16353 hsa-mir-24-2 | PSMD7    | 0.422771355 mirna_pc |
| 16354 hsa-mir-24-2 | GYLTL1B  | 0.321676928 mirna_pc |
| 16355 hsa-mir-24-2 | MED27    | 0.459167283 mirna_pc |
| 16356 hsa-mir-24-2 | TOMM22   | 0.460836749 mirna_pc |
| 16357 hsa-mir-24-2 | EBPL     | 0.308984839 mirna_pc |
| 16358 hsa-mir-24-2 | VTI1B    | 0.314422671 mirna_pc |
| 16359 hsa-mir-24-2 | TCP1     | 0.384666442 mirna_pc |
| 16360 hsa-mir-24-2 | C9orf30  | 0.303815205 mirna_pc |
| 16361 hsa-mir-24-2 | WDR66    | 0.504967723 mirna_pc |

|                    |           |                      |
|--------------------|-----------|----------------------|
| 16362 hsa-mir-24-2 | TAGLN2    | 0.426591547 mirna_pc |
| 16363 hsa-mir-24-2 | C8orf30A  | 0.354038655 mirna_pc |
| 16364 hsa-mir-24-2 | ANKRD9    | 0.394639014 mirna_pc |
| 16365 hsa-mir-24-2 | ODC1      | 0.303204454 mirna_pc |
| 16366 hsa-mir-24-2 | FZD6      | 0.303989226 mirna_pc |
| 16367 hsa-mir-24-2 | WRNIP1    | 0.314180402 mirna_pc |
| 16368 hsa-mir-24-2 | TECR      | 0.443538852 mirna_pc |
| 16369 hsa-mir-24-2 | BAD       | 0.387122783 mirna_pc |
| 16370 hsa-mir-24-2 | PDZD11    | 0.309440296 mirna_pc |
| 16371 hsa-mir-24-2 | PPME1     | 0.318587588 mirna_pc |
| 16372 hsa-mir-24-2 | LOC441089 | 0.420695615 mirna_pc |
| 16373 hsa-mir-24-2 | SEMA4B    | 0.356124129 mirna_pc |
| 16374 hsa-mir-24-2 | TUBA4A    | 0.368731602 mirna_pc |
| 16375 hsa-mir-24-2 | HES4      | 0.437594397 mirna_pc |
| 16376 hsa-mir-24-2 | DUSP14    | 0.353062263 mirna_pc |
| 16377 hsa-mir-24-2 | ANXA2P1   | 0.370213716 mirna_pc |
| 16378 hsa-mir-24-2 | VPS4A     | 0.364569673 mirna_pc |
| 16379 hsa-mir-24-2 | DSP       | 0.324494454 mirna_pc |
| 16380 hsa-mir-24-2 | XRCC6BP1  | 0.363281475 mirna_pc |
| 16381 hsa-mir-24-2 | RPP21     | 0.3811563 mirna_pc   |
| 16382 hsa-mir-24-2 | IFI16     | 0.369748003 mirna_pc |
| 16383 hsa-mir-24-2 | RIOK1     | 0.30815398 mirna_pc  |
| 16384 hsa-mir-24-2 | C3orf1    | 0.347391891 mirna_pc |
| 16385 hsa-mir-24-2 | NXPH4     | 0.449245603 mirna_pc |
| 16386 hsa-mir-24-2 | MXD3      | 0.301852573 mirna_pc |
| 16387 hsa-mir-24-2 | MPHOSPH6  | 0.403724406 mirna_pc |
| 16388 hsa-mir-24-2 | TMPRSS13  | 0.317651269 mirna_pc |
| 16389 hsa-mir-24-2 | KLC2      | 0.404916881 mirna_pc |
| 16390 hsa-mir-24-2 | NRD1      | 0.348589376 mirna_pc |
| 16391 hsa-mir-24-2 | ZNF598    | 0.507822547 mirna_pc |
| 16392 hsa-mir-24-2 | FAM89A    | 0.382076407 mirna_pc |
| 16393 hsa-mir-24-2 | FGFR3     | 0.340545013 mirna_pc |
| 16394 hsa-mir-24-2 | C19orf53  | 0.50676673 mirna_pc  |
| 16395 hsa-mir-24-2 | TEL02     | 0.435227661 mirna_pc |
| 16396 hsa-mir-24-2 | CDK16     | 0.357591588 mirna_pc |
| 16397 hsa-mir-24-2 | ALKBH2    | 0.375823691 mirna_pc |
| 16398 hsa-mir-24-2 | RRP1      | 0.365988905 mirna_pc |
| 16399 hsa-mir-24-2 | POP5      | 0.356420982 mirna_pc |
| 16400 hsa-mir-24-2 | TCTEX1D2  | 0.378703669 mirna_pc |
| 16401 hsa-mir-24-2 | NETO2     | 0.309752883 mirna_pc |
| 16402 hsa-mir-24-2 | SPHK1     | 0.385992316 mirna_pc |
| 16403 hsa-mir-24-2 | BNIP3     | 0.429512363 mirna_pc |
| 16404 hsa-mir-24-2 | RNF126    | 0.60706554 mirna_pc  |
| 16405 hsa-mir-24-2 | MLF 2.00  | 0.491530281 mirna_pc |
| 16406 hsa-mir-24-2 | FAM108A1  | 0.406568458 mirna_pc |
| 16407 hsa-mir-24-2 | RAB7A     | 0.366380087 mirna_pc |
| 16408 hsa-mir-24-2 | MRPL36    | 0.378862806 mirna_pc |
| 16409 hsa-mir-24-2 | SIGMAR1   | 0.305992826 mirna_pc |
| 16410 hsa-mir-24-2 | RHOG      | 0.339522144 mirna_pc |
| 16411 hsa-mir-24-2 | CSNK2B    | 0.360443958 mirna_pc |
| 16412 hsa-mir-24-2 | RPF2      | 0.362367894 mirna_pc |
| 16413 hsa-mir-24-2 | C1orf170  | 0.407525684 mirna_pc |
| 16414 hsa-mir-24-2 | ARL6IP4   | 0.320011333 mirna_pc |
| 16415 hsa-mir-24-2 | FBXW9     | 0.302336072 mirna_pc |

|                    |           |                      |
|--------------------|-----------|----------------------|
| 16416 hsa-mir-24-2 | GSTO1     | 0.402503549 mirna_pc |
| 16417 hsa-mir-24-2 | DDB2      | 0.380093393 mirna_pc |
| 16418 hsa-mir-24-2 | RPL39L    | 0.362253233 mirna_pc |
| 16419 hsa-mir-24-2 | KATNB1    | 0.321471512 mirna_pc |
| 16420 hsa-mir-24-2 | EIF2B2    | 0.313384222 mirna_pc |
| 16421 hsa-mir-24-2 | ACD       | 0.415159272 mirna_pc |
| 16422 hsa-mir-24-2 | C14orf33  | 0.319438864 mirna_pc |
| 16423 hsa-mir-24-2 | GPN3      | 0.355448847 mirna_pc |
| 16424 hsa-mir-24-2 | RAD23A    | 0.446055834 mirna_pc |
| 16425 hsa-mir-24-2 | DNLZ      | 0.363276833 mirna_pc |
| 16426 hsa-mir-24-2 | RPUSD1    | 0.499378829 mirna_pc |
| 16427 hsa-mir-24-2 | LOC152217 | 0.424062847 mirna_pc |
| 16428 hsa-mir-24-2 | USP14     | 0.323125418 mirna_pc |
| 16429 hsa-mir-24-2 | MRPL37    | 0.422491221 mirna_pc |
| 16430 hsa-mir-24-2 | PLA2G4E   | 0.347150902 mirna_pc |
| 16431 hsa-mir-24-2 | GPR109B   | 0.376963619 mirna_pc |
| 16432 hsa-mir-24-2 | MEMO1     | 0.532393642 mirna_pc |
| 16433 hsa-mir-24-2 | PPM1J     | 0.406623516 mirna_pc |
| 16434 hsa-mir-24-2 | CCDC23    | 0.370035363 mirna_pc |
| 16435 hsa-mir-24-2 | FKBP8     | 0.402469916 mirna_pc |
| 16436 hsa-mir-24-2 | NDUFS6    | 0.32346223 mirna_pc  |
| 16437 hsa-mir-24-2 | NOB1      | 0.412525329 mirna_pc |
| 16438 hsa-mir-24-2 | EIF3I     | 0.553543104 mirna_pc |
| 16439 hsa-mir-24-2 | UBXN2A    | 0.337311353 mirna_pc |
| 16440 hsa-mir-24-2 | ADK       | 0.486228965 mirna_pc |
| 16441 hsa-mir-24-2 | RPL12     | 0.445139473 mirna_pc |
| 16442 hsa-mir-24-2 | C9orf89   | 0.306282672 mirna_pc |
| 16443 hsa-mir-24-2 | WDR47     | 0.302540481 mirna_pc |
| 16444 hsa-mir-24-2 | ZMYND19   | 0.391505289 mirna_pc |
| 16445 hsa-mir-24-2 | NDUFA8    | 0.319861929 mirna_pc |
| 16446 hsa-mir-24-2 | NAA20     | 0.370089523 mirna_pc |
| 16447 hsa-mir-24-2 | GAS2L1    | 0.369351137 mirna_pc |
| 16448 hsa-mir-24-2 | TRAP1     | 0.440185446 mirna_pc |
| 16449 hsa-mir-24-2 | TAF12     | 0.441173353 mirna_pc |
| 16450 hsa-mir-24-2 | ARPC5L    | 0.378877363 mirna_pc |
| 16451 hsa-mir-24-2 | C19orf73  | 0.334441965 mirna_pc |
| 16452 hsa-mir-24-2 | FAM96B    | 0.342297466 mirna_pc |
| 16453 hsa-mir-24-2 | DDX41     | 0.372889894 mirna_pc |
| 16454 hsa-mir-24-2 | HOXD8     | 0.352663423 mirna_pc |
| 16455 hsa-mir-24-2 | ICT1      | 0.404417584 mirna_pc |
| 16456 hsa-mir-24-2 | C15orf63  | 0.432990625 mirna_pc |
| 16457 hsa-mir-24-2 | STX8      | 0.327414195 mirna_pc |
| 16458 hsa-mir-24-2 | LTB4R     | 0.387954385 mirna_pc |
| 16459 hsa-mir-24-2 | SURF2     | 0.539812 mirna_pc    |
| 16460 hsa-mir-24-2 | METTL11A  | 0.359763029 mirna_pc |
| 16461 hsa-mir-24-2 | TRPT1     | 0.301832009 mirna_pc |
| 16462 hsa-mir-24-2 | PUSL1     | 0.350696162 mirna_pc |
| 16463 hsa-mir-24-2 | APOA1BP   | 0.43145661 mirna_pc  |
| 16464 hsa-mir-24-2 | RFXANK    | 0.409121265 mirna_pc |
| 16465 hsa-mir-24-2 | HES2      | 0.344286163 mirna_pc |
| 16466 hsa-mir-24-2 | MED10     | 0.40718522 mirna_pc  |
| 16467 hsa-mir-24-2 | DUSP7     | 0.460760898 mirna_pc |
| 16468 hsa-mir-24-2 | GNA15     | 0.46299125 mirna_pc  |
| 16469 hsa-mir-24-2 | LTBR      | 0.367977498 mirna_pc |

|                    |              |                      |
|--------------------|--------------|----------------------|
| 16470 hsa-mir-24-2 | PWP1         | 0.405899123 mirna_pc |
| 16471 hsa-mir-24-2 | S1PR5        | 0.331773758 mirna_pc |
| 16472 hsa-mir-24-2 | MNAT1        | 0.363958092 mirna_pc |
| 16473 hsa-mir-24-2 | RPL37        | 0.372585909 mirna_pc |
| 16474 hsa-mir-24-2 | DRAP1        | 0.557583355 mirna_pc |
| 16475 hsa-mir-24-2 | SMARCB1      | 0.38243175 mirna_pc  |
| 16476 hsa-mir-24-2 | CHIC2        | 0.305356637 mirna_pc |
| 16477 hsa-mir-24-2 | DDX54        | 0.339803167 mirna_pc |
| 16478 hsa-mir-24-2 | TBC1D2       | 0.424731482 mirna_pc |
| 16479 hsa-mir-24-2 | CCT8         | 0.354378164 mirna_pc |
| 16480 hsa-mir-24-2 | B3GAT3       | 0.400274514 mirna_pc |
| 16481 hsa-mir-24-2 | MEX3D        | 0.477315576 mirna_pc |
| 16482 hsa-mir-24-2 | B4GALT2      | 0.528104518 mirna_pc |
| 16483 hsa-mir-24-2 | UFD1L        | 0.391332585 mirna_pc |
| 16484 hsa-mir-24-2 | RPA1         | 0.334893958 mirna_pc |
| 16485 hsa-mir-24-2 | FAM92A1      | 0.375989996 mirna_pc |
| 16486 hsa-mir-24-2 | CNN2         | 0.432259246 mirna_pc |
| 16487 hsa-mir-24-2 | SART1        | 0.316986928 mirna_pc |
| 16488 hsa-mir-24-2 | TIMM10       | 0.429997752 mirna_pc |
| 16489 hsa-mir-24-2 | TGFB1        | 0.407181274 mirna_pc |
| 16490 hsa-mir-24-2 | IRF6         | 0.420292085 mirna_pc |
| 16491 hsa-mir-24-2 | ZDHHC18      | 0.461926834 mirna_pc |
| 16492 hsa-mir-24-2 | FZR1         | 0.309233306 mirna_pc |
| 16493 hsa-mir-24-2 | RPL38        | 0.517711961 mirna_pc |
| 16494 hsa-mir-24-2 | FOXK2        | 0.332178235 mirna_pc |
| 16495 hsa-mir-24-2 | ANAPC10      | 0.308154692 mirna_pc |
| 16496 hsa-mir-24-2 | HSD17B10     | 0.382313084 mirna_pc |
| 16497 hsa-mir-24-2 | ABT1         | 0.343615481 mirna_pc |
| 16498 hsa-mir-24-2 | FAM86A       | 0.407292501 mirna_pc |
| 16499 hsa-mir-24-2 | TIGD5        | 0.479384334 mirna_pc |
| 16500 hsa-mir-24-2 | HEPHL1       | 0.336478561 mirna_pc |
| 16501 hsa-mir-24-2 | NUDT8        | 0.413515697 mirna_pc |
| 16502 hsa-mir-24-2 | NOP16        | 0.339607255 mirna_pc |
| 16503 hsa-mir-24-2 | IL1F9        | 0.350538701 mirna_pc |
| 16504 hsa-mir-24-2 | SLC7A5       | 0.400600244 mirna_pc |
| 16505 hsa-mir-24-2 | SLC16A1      | 0.399817766 mirna_pc |
| 16506 hsa-mir-24-2 | ACTR1A       | 0.309343957 mirna_pc |
| 16507 hsa-mir-24-2 | SLC25A17     | 0.42111407 mirna_pc  |
| 16508 hsa-mir-24-2 | IKBKG        | 0.301479492 mirna_pc |
| 16509 hsa-mir-24-2 | CDK7         | 0.33582197 mirna_pc  |
| 16510 hsa-mir-24-2 | C19orf6      | 0.405511025 mirna_pc |
| 16511 hsa-mir-24-2 | NDUFS7       | 0.41734151 mirna_pc  |
| 16512 hsa-mir-24-2 | KLC3         | 0.406490929 mirna_pc |
| 16513 hsa-mir-24-2 | RPS7         | 0.486208966 mirna_pc |
| 16514 hsa-mir-24-2 | THSD1        | 0.304197929 mirna_pc |
| 16515 hsa-mir-24-2 | SH3BGRL3     | 0.427493725 mirna_pc |
| 16516 hsa-mir-24-2 | LOC100133161 | 0.35084046 mirna_pc  |
| 16517 hsa-mir-24-2 | STYXL1       | 0.338967369 mirna_pc |
| 16518 hsa-mir-24-2 | BLOC1S2      | 0.393839357 mirna_pc |
| 16519 hsa-mir-24-2 | GSDMC        | 0.353574415 mirna_pc |
| 16520 hsa-mir-24-2 | EPPK1        | 0.324667533 mirna_pc |
| 16521 hsa-mir-24-2 | C11orf17     | 0.309503761 mirna_pc |
| 16522 hsa-mir-24-2 | MKRN3        | 0.382203167 mirna_pc |
| 16523 hsa-mir-24-2 | LOC401010    | 0.302033331 mirna_pc |

|                    |              |                      |
|--------------------|--------------|----------------------|
| 16524 hsa-mir-24-2 | METAP2       | 0.422433387 mirna_pc |
| 16525 hsa-mir-24-2 | ATP5D        | 0.439204678 mirna_pc |
| 16526 hsa-mir-24-2 | CLNS1A       | 0.388357027 mirna_pc |
| 16527 hsa-mir-24-2 | SLC2A9       | 0.378932528 mirna_pc |
| 16528 hsa-mir-24-2 | C6orf1       | 0.460016418 mirna_pc |
| 16529 hsa-mir-24-2 | STRA13       | 0.392737549 mirna_pc |
| 16530 hsa-mir-24-2 | RPL35        | 0.491157927 mirna_pc |
| 16531 hsa-mir-24-2 | RRP7A        | 0.359818097 mirna_pc |
| 16532 hsa-mir-24-2 | HGS          | 0.443267763 mirna_pc |
| 16533 hsa-mir-24-2 | TMEM154      | 0.395519391 mirna_pc |
| 16534 hsa-mir-24-2 | NHP2         | 0.416450718 mirna_pc |
| 16535 hsa-mir-24-2 | PSMC3        | 0.478490098 mirna_pc |
| 16536 hsa-mir-24-2 | FER          | 0.302336507 mirna_pc |
| 16537 hsa-mir-24-2 | TIMM16       | 0.487169205 mirna_pc |
| 16538 hsa-mir-24-2 | MTX1         | 0.455862956 mirna_pc |
| 16539 hsa-mir-24-2 | MIER2        | 0.402165964 mirna_pc |
| 16540 hsa-mir-24-2 | MRPS28       | 0.3785583 mirna_pc   |
| 16541 hsa-mir-24-2 | DVL2         | 0.354535062 mirna_pc |
| 16542 hsa-mir-24-2 | STARD5       | 0.432027257 mirna_pc |
| 16543 hsa-mir-24-2 | GPR109A      | 0.393018253 mirna_pc |
| 16544 hsa-mir-24-2 | TTC4         | 0.462005137 mirna_pc |
| 16545 hsa-mir-24-2 | LOC100289341 | 0.304602283 mirna_pc |
| 16546 hsa-mir-24-2 | NUDCD2       | 0.430694397 mirna_pc |
| 16547 hsa-mir-24-2 | RPL8         | 0.425740302 mirna_pc |
| 16548 hsa-mir-24-2 | CCM2         | 0.332364344 mirna_pc |
| 16549 hsa-mir-24-2 | NRBP2        | 0.322951304 mirna_pc |
| 16550 hsa-mir-24-2 | C3orf67      | 0.366385261 mirna_pc |
| 16551 hsa-mir-24-2 | SUMO3        | 0.308605939 mirna_pc |
| 16552 hsa-mir-24-2 | PANX1        | 0.413549543 mirna_pc |
| 16553 hsa-mir-24-2 | FAM83A       | 0.353610115 mirna_pc |
| 16554 hsa-mir-24-2 | SKP1         | 0.327669863 mirna_pc |
| 16555 hsa-mir-24-2 | GJB5         | 0.528796475 mirna_pc |
| 16556 hsa-mir-24-2 | HK2          | 0.304751888 mirna_pc |
| 16557 hsa-mir-24-2 | FOSL1        | 0.302103459 mirna_pc |
| 16558 hsa-mir-24-2 | DGKA         | 0.399932055 mirna_pc |
| 16559 hsa-mir-24-2 | ACTB         | 0.310223304 mirna_pc |
| 16560 hsa-mir-24-2 | CMIP         | 0.334615995 mirna_pc |
| 16561 hsa-mir-24-2 | PPP1R14C     | 0.416973364 mirna_pc |
| 16562 hsa-mir-24-2 | LTB4R2       | 0.390811272 mirna_pc |
| 16563 hsa-mir-24-2 | ANXA8L2      | 0.380664206 mirna_pc |
| 16564 hsa-mir-24-2 | MRPS22       | 0.424205992 mirna_pc |
| 16565 hsa-mir-24-2 | S100A13      | 0.308288162 mirna_pc |
| 16566 hsa-mir-24-2 | IFFO2        | 0.35611013 mirna_pc  |
| 16567 hsa-mir-24-2 | CDK5R1       | 0.357773007 mirna_pc |
| 16568 hsa-mir-24-2 | EIF2S1       | 0.306921064 mirna_pc |
| 16569 hsa-mir-24-2 | S100A2       | 0.597232095 mirna_pc |
| 16570 hsa-mir-24-2 | NDUFB10      | 0.397102508 mirna_pc |
| 16571 hsa-mir-24-2 | MGC72080     | 0.323617747 mirna_pc |
| 16572 hsa-mir-24-2 | DUS3L        | 0.40064526 mirna_pc  |
| 16573 hsa-mir-24-2 | C9orf69      | 0.357356234 mirna_pc |
| 16574 hsa-mir-24-2 | MRPS21       | 0.30799095 mirna_pc  |
| 16575 hsa-mir-24-2 | RIN1         | 0.326021665 mirna_pc |
| 16576 hsa-mir-24-2 | IPPK         | 0.397958403 mirna_pc |
| 16577 hsa-mir-24-2 | ADAMTSL5     | 0.375807619 mirna_pc |

|                    |           |                      |
|--------------------|-----------|----------------------|
| 16578 hsa-mir-24-2 | LYPD3     | 0.31168493 mirna_pc  |
| 16579 hsa-mir-24-2 | ANAPC11   | 0.445377722 mirna_pc |
| 16580 hsa-mir-24-2 | TARS      | 0.349994346 mirna_pc |
| 16581 hsa-mir-24-2 | C11orf83  | 0.329615378 mirna_pc |
| 16582 hsa-mir-24-2 | MPV17     | 0.509281304 mirna_pc |
| 16583 hsa-mir-24-2 | LPAR3     | 0.385362476 mirna_pc |
| 16584 hsa-mir-24-2 | TUSC1     | 0.426902663 mirna_pc |
| 16585 hsa-mir-24-2 | CARHSP1   | 0.434924869 mirna_pc |
| 16586 hsa-mir-24-2 | PAK6      | 0.305243421 mirna_pc |
| 16587 hsa-mir-24-2 | GTF2A2    | 0.349151251 mirna_pc |
| 16588 hsa-mir-24-2 | NDUFA6    | 0.353754364 mirna_pc |
| 16589 hsa-mir-24-2 | NDUFB7    | 0.451950385 mirna_pc |
| 16590 hsa-mir-24-2 | PCBP1     | 0.336069023 mirna_pc |
| 16591 hsa-mir-24-2 | HRAS      | 0.598390342 mirna_pc |
| 16592 hsa-mir-24-2 | NRBP1     | 0.437826236 mirna_pc |
| 16593 hsa-mir-24-2 | UBE2N     | 0.339009313 mirna_pc |
| 16594 hsa-mir-24-2 | CHCHD2    | 0.337344332 mirna_pc |
| 16595 hsa-mir-24-2 | TPBG      | 0.317364051 mirna_pc |
| 16596 hsa-mir-24-2 | MRPS2     | 0.314359105 mirna_pc |
| 16597 hsa-mir-24-2 | NDUFAF2   | 0.328504831 mirna_pc |
| 16598 hsa-mir-24-2 | PIGX      | 0.357074345 mirna_pc |
| 16599 hsa-mir-24-2 | HTRA2     | 0.450436496 mirna_pc |
| 16600 hsa-mir-24-2 | RAB38     | 0.516853502 mirna_pc |
| 16601 hsa-mir-24-2 | KEAP1     | 0.307541909 mirna_pc |
| 16602 hsa-mir-24-2 | DOHH      | 0.375201452 mirna_pc |
| 16603 hsa-mir-24-2 | IPO13     | 0.325513699 mirna_pc |
| 16604 hsa-mir-24-2 | PDLIM1    | 0.361289121 mirna_pc |
| 16605 hsa-mir-24-2 | GRHL3     | 0.310773158 mirna_pc |
| 16606 hsa-mir-24-2 | SLC48A1   | 0.3451129 mirna_pc   |
| 16607 hsa-mir-24-2 | PFN2      | 0.352850581 mirna_pc |
| 16608 hsa-mir-24-2 | C14orf156 | 0.427178845 mirna_pc |
| 16609 hsa-mir-24-2 | FAM127C   | 0.3022566 mirna_pc   |
| 16610 hsa-mir-24-2 | C10orf58  | 0.471909828 mirna_pc |
| 16611 hsa-mir-24-2 | UBE2V2    | 0.382683688 mirna_pc |
| 16612 hsa-mir-24-2 | MTX2      | 0.36056393 mirna_pc  |
| 16613 hsa-mir-24-2 | JMJD8     | 0.391592321 mirna_pc |
| 16614 hsa-mir-24-2 | NHP2L1    | 0.425899101 mirna_pc |
| 16615 hsa-mir-24-2 | DCTN1     | 0.318622776 mirna_pc |
| 16616 hsa-mir-24-2 | ATP6V1F   | 0.476414348 mirna_pc |
| 16617 hsa-mir-24-2 | SLC25A10  | 0.317277292 mirna_pc |
| 16618 hsa-mir-24-2 | CIAPIN1   | 0.345397847 mirna_pc |
| 16619 hsa-mir-24-2 | MRPL24    | 0.362693959 mirna_pc |
| 16620 hsa-mir-24-2 | DRG1      | 0.479854999 mirna_pc |
| 16621 hsa-mir-24-2 | GNAI1     | 0.372348009 mirna_pc |
| 16622 hsa-mir-24-2 | SLC39A3   | 0.430133142 mirna_pc |
| 16623 hsa-mir-24-2 | SSSCA1    | 0.515674921 mirna_pc |
| 16624 hsa-mir-24-2 | NOL7      | 0.351253212 mirna_pc |
| 16625 hsa-mir-24-2 | B4GALNT1  | 0.334569564 mirna_pc |
| 16626 hsa-mir-24-2 | HSPB1     | 0.552372573 mirna_pc |
| 16627 hsa-mir-24-2 | C1orf74   | 0.378903808 mirna_pc |
| 16628 hsa-mir-24-2 | MAP2K1    | 0.34635773 mirna_pc  |
| 16629 hsa-mir-24-2 | ASNA1     | 0.429978837 mirna_pc |
| 16630 hsa-mir-24-2 | GPC1      | 0.403414052 mirna_pc |
| 16631 hsa-mir-24-2 | EXOSC1    | 0.376810336 mirna_pc |



|       |              |            |             |          |
|-------|--------------|------------|-------------|----------|
| 16632 | hsa-mir-24-2 | GADD45GIP1 | 0.571082265 | mirna_pc |
| 16633 | hsa-mir-24-2 | DEPDC7     | 0.330235616 | mirna_pc |
| 16634 | hsa-mir-24-2 | PKP1       | 0.404584412 | mirna_pc |
| 16635 | hsa-mir-24-2 | C9orf114   | 0.328794809 | mirna_pc |
| 16636 | hsa-mir-24-2 | ACAP3      | 0.307163435 | mirna_pc |
| 16637 | hsa-mir-24-2 | C16orf91   | 0.391149127 | mirna_pc |
| 16638 | hsa-mir-24-2 | NT5C       | 0.439779947 | mirna_pc |
| 16639 | hsa-mir-24-2 | PTMS       | 0.476077194 | mirna_pc |
| 16640 | hsa-mir-24-2 | STON2      | 0.390033614 | mirna_pc |
| 16641 | hsa-mir-24-2 | STAMBP     | 0.332744034 | mirna_pc |
| 16642 | hsa-mir-24-2 | SH3GL1     | 0.390483551 | mirna_pc |
| 16643 | hsa-mir-24-2 | DSC2       | 0.3074081   | mirna_pc |
| 16644 | hsa-mir-24-2 | CAPN1      | 0.349152119 | mirna_pc |
| 16645 | hsa-mir-24-2 | HR         | 0.36109712  | mirna_pc |
| 16646 | hsa-mir-24-2 | APOBEC3A   | 0.305832538 | mirna_pc |
| 16647 | hsa-mir-24-2 | SLC4A1AP   | 0.36182202  | mirna_pc |
| 16648 | hsa-mir-24-2 | TTC27      | 0.319772409 | mirna_pc |
| 16649 | hsa-mir-24-2 | FLJ45445   | 0.372614973 | mirna_pc |
| 16650 | hsa-mir-24-2 | ATP5L      | 0.311427108 | mirna_pc |
| 16651 | hsa-mir-24-2 | C1orf151   | 0.31523952  | mirna_pc |
| 16652 | hsa-mir-24-2 | C11orf73   | 0.358262811 | mirna_pc |
| 16653 | hsa-mir-24-2 | CCDC124    | 0.542895994 | mirna_pc |
| 16654 | hsa-mir-24-2 | RPF1       | 0.341846623 | mirna_pc |
| 16655 | hsa-mir-24-2 | NEDD8      | 0.384170762 | mirna_pc |
| 16656 | hsa-mir-24-2 | RNF187     | 0.461415133 | mirna_pc |
| 16657 | hsa-mir-24-2 | FAM83C     | 0.339546226 | mirna_pc |
| 16658 | hsa-mir-24-2 | C16orf61   | 0.314702009 | mirna_pc |
| 16659 | hsa-mir-24-2 | FIBP       | 0.406096004 | mirna_pc |
| 16660 | hsa-mir-24-2 | MRPS34     | 0.53279182  | mirna_pc |
| 16661 | hsa-mir-24-2 | TXN2       | 0.351517208 | mirna_pc |
| 16662 | hsa-mir-24-2 | DUS2L      | 0.415881198 | mirna_pc |
| 16663 | hsa-mir-24-2 | KIFC2      | 0.356045089 | mirna_pc |
| 16664 | hsa-mir-24-2 | LRRC28     | 0.311930457 | mirna_pc |
| 16665 | hsa-mir-24-2 | EIF3M      | 0.318824958 | mirna_pc |
| 16666 | hsa-mir-24-2 | TRAF7      | 0.507572007 | mirna_pc |
| 16667 | hsa-mir-24-2 | DARS       | 0.301461607 | mirna_pc |
| 16668 | hsa-mir-24-2 | AAAS       | 0.414780801 | mirna_pc |
| 16669 | hsa-mir-24-2 | KRT16      | 0.320850168 | mirna_pc |
| 16670 | hsa-mir-24-2 | MARK3      | 0.304121193 | mirna_pc |
| 16671 | hsa-mir-24-2 | PRDX2      | 0.351013306 | mirna_pc |
| 16672 | hsa-mir-24-2 | COX5B      | 0.345198392 | mirna_pc |
| 16673 | hsa-mir-24-2 | C3orf54    | 0.490955684 | mirna_pc |
| 16674 | hsa-mir-24-2 | KATNA1     | 0.348487245 | mirna_pc |
| 16675 | hsa-mir-24-2 | TNFAIP8    | 0.32539521  | mirna_pc |
| 16676 | hsa-mir-24-2 | TMEM107    | 0.339272192 | mirna_pc |
| 16677 | hsa-mir-24-2 | C17orf90   | 0.324299413 | mirna_pc |
| 16678 | hsa-mir-24-2 | C1orf57    | 0.377377826 | mirna_pc |
| 16679 | hsa-mir-24-2 | COL17A1    | 0.393535359 | mirna_pc |
| 16680 | hsa-mir-24-2 | FDXR       | 0.524006081 | mirna_pc |
| 16681 | hsa-mir-24-2 | C2orf79    | 0.426298062 | mirna_pc |
| 16682 | hsa-mir-24-2 | MTFMT      | 0.314162022 | mirna_pc |
| 16683 | hsa-mir-24-2 | DSG3       | 0.393998784 | mirna_pc |
| 16684 | hsa-mir-24-2 | TPD52L1    | 0.327708303 | mirna_pc |
| 16685 | hsa-mir-24-2 | PEMT       | 0.349425378 | mirna_pc |

|                    |          |                      |
|--------------------|----------|----------------------|
| 16686 hsa-mir-24-2 | PYGL     | 0.43702114 mirna_pc  |
| 16687 hsa-mir-24-2 | DHRS4    | 0.390117198 mirna_pc |
| 16688 hsa-mir-24-2 | KRT5     | 0.614613087 mirna_pc |
| 16689 hsa-mir-24-2 | LASS4    | 0.404704298 mirna_pc |
| 16690 hsa-mir-24-2 | FGF11    | 0.358439547 mirna_pc |
| 16691 hsa-mir-24-2 | DERA     | 0.337897093 mirna_pc |
| 16692 hsa-mir-24-2 | ARHGDI A | 0.437277231 mirna_pc |
| 16693 hsa-mir-24-2 | PRELID1  | 0.331924977 mirna_pc |
| 16694 hsa-mir-24-2 | MRPL30   | 0.306010209 mirna_pc |
| 16695 hsa-mir-24-2 | TALDO1   | 0.358133507 mirna_pc |
| 16696 hsa-mir-24-2 | SNAPIN   | 0.46159319 mirna_pc  |
| 16697 hsa-mir-24-2 | METTL5   | 0.360787304 mirna_pc |
| 16698 hsa-mir-24-2 | KRT6A    | 0.439334108 mirna_pc |
| 16699 hsa-mir-24-2 | DYNLL1   | 0.528342123 mirna_pc |
| 16700 hsa-mir-24-2 | PGP      | 0.395853765 mirna_pc |
| 16701 hsa-mir-24-2 | KRT6B    | 0.336862008 mirna_pc |
| 16702 hsa-mir-24-2 | FGFBP1   | 0.547509169 mirna_pc |
| 16703 hsa-mir-24-2 | NOL12    | 0.313819875 mirna_pc |
| 16704 hsa-mir-24-2 | C11orf45 | 0.334679743 mirna_pc |
| 16705 hsa-mir-24-2 | TTL12    | 0.363746812 mirna_pc |
| 16706 hsa-mir-24-2 | IL20RB   | 0.451555745 mirna_pc |
| 16707 hsa-mir-24-2 | GOLGA7B  | 0.323191319 mirna_pc |
| 16708 hsa-mir-24-2 | GPR87    | 0.410726576 mirna_pc |
| 16709 hsa-mir-24-2 | ZNF385A  | 0.505563161 mirna_pc |
| 16710 hsa-mir-24-2 | ITGB1BP1 | 0.535158892 mirna_pc |
| 16711 hsa-mir-24-2 | RPS16    | 0.30454385 mirna_pc  |
| 16712 hsa-mir-24-2 | POLR3H   | 0.369816651 mirna_pc |
| 16713 hsa-mir-24-2 | OSTF1    | 0.352765472 mirna_pc |
| 16714 hsa-mir-24-2 | COMMD8   | 0.310358666 mirna_pc |
| 16715 hsa-mir-24-2 | C18orf10 | 0.367544532 mirna_pc |
| 16716 hsa-mir-24-2 | GPR98    | 0.3224016 mirna_pc   |
| 16717 hsa-mir-24-2 | PEX10    | 0.386659149 mirna_pc |
| 16718 hsa-mir-24-2 | NDUFB1   | 0.302905332 mirna_pc |
| 16719 hsa-mir-24-2 | C9orf119 | 0.385969219 mirna_pc |
| 16720 hsa-mir-24-2 | EMD      | 0.396533038 mirna_pc |
| 16721 hsa-mir-24-2 | MRPL52   | 0.390215807 mirna_pc |
| 16722 hsa-mir-24-2 | RPS24    | 0.359941689 mirna_pc |
| 16723 hsa-mir-24-2 | HSD17B1  | 0.458983263 mirna_pc |
| 16724 hsa-mir-24-2 | DSC3     | 0.416451692 mirna_pc |
| 16725 hsa-mir-24-2 | RNF40    | 0.305965386 mirna_pc |
| 16726 hsa-mir-24-2 | CCDC53   | 0.410715352 mirna_pc |
| 16727 hsa-mir-24-2 | RAET1G   | 0.356369815 mirna_pc |
| 16728 hsa-mir-24-2 | CAPZB    | 0.351559623 mirna_pc |
| 16729 hsa-mir-24-2 | STRADA   | 0.311514268 mirna_pc |
| 16730 hsa-mir-24-2 | SARNP    | 0.41806101 mirna_pc  |
| 16731 hsa-mir-24-2 | PGLS     | 0.427015939 mirna_pc |
| 16732 hsa-mir-24-2 | ENDOG    | 0.405814891 mirna_pc |
| 16733 hsa-mir-24-2 | SIAH2    | 0.313738284 mirna_pc |
| 16734 hsa-mir-24-2 | INO80B   | 0.504942349 mirna_pc |
| 16735 hsa-mir-24-2 | LY6K     | 0.378995039 mirna_pc |
| 16736 hsa-mir-24-2 | MBD3     | 0.397771144 mirna_pc |
| 16737 hsa-mir-24-2 | WASF2    | 0.430876053 mirna_pc |
| 16738 hsa-mir-24-2 | COQ3     | 0.386120822 mirna_pc |
| 16739 hsa-mir-24-2 | RPL7     | 0.326264123 mirna_pc |

|                    |           |                      |
|--------------------|-----------|----------------------|
| 16740 hsa-mir-24-2 | NOD2      | 0.308931024 mirna_pc |
| 16741 hsa-mir-24-2 | RPL17     | 0.428404438 mirna_pc |
| 16742 hsa-mir-24-2 | ANXA8     | 0.351454234 mirna_pc |
| 16743 hsa-mir-24-2 | ARTN      | 0.389329222 mirna_pc |
| 16744 hsa-mir-24-2 | STK11     | 0.352918846 mirna_pc |
| 16745 hsa-mir-24-2 | RXRA      | 0.408455198 mirna_pc |
| 16746 hsa-mir-24-2 | VSNL1     | 0.511469202 mirna_pc |
| 16747 hsa-mir-24-2 | HSF1      | 0.488324931 mirna_pc |
| 16748 hsa-mir-24-2 | ARHGAP23  | 0.318234649 mirna_pc |
| 16749 hsa-mir-24-2 | FAM83F    | 0.418331077 mirna_pc |
| 16750 hsa-mir-24-2 | DCI       | 0.333055343 mirna_pc |
| 16751 hsa-mir-24-2 | JARID2    | 0.310299791 mirna_pc |
| 16752 hsa-mir-24-2 | AVEN      | 0.350936761 mirna_pc |
| 16753 hsa-mir-24-2 | PLS3      | 0.423359066 mirna_pc |
| 16754 hsa-mir-24-2 | IL1F5     | 0.35903823 mirna_pc  |
| 16755 hsa-mir-24-2 | CCDC85B   | 0.47895279 mirna_pc  |
| 16756 hsa-mir-24-2 | FABP5     | 0.425791118 mirna_pc |
| 16757 hsa-mir-24-2 | HOMER3    | 0.480241422 mirna_pc |
| 16758 hsa-mir-24-2 | ABCF3     | 0.407093629 mirna_pc |
| 16759 hsa-mir-24-2 | TIMM13    | 0.45640152 mirna_pc  |
| 16760 hsa-mir-24-2 | ADAT3     | 0.347832547 mirna_pc |
| 16761 hsa-mir-24-2 | ATP6V1E1  | 0.30555553 mirna_pc  |
| 16762 hsa-mir-24-2 | AMZ2      | 0.411799888 mirna_pc |
| 16763 hsa-mir-24-2 | BTBD11    | 0.38578618 mirna_pc  |
| 16764 hsa-mir-24-2 | SHC1      | 0.346597231 mirna_pc |
| 16765 hsa-mir-24-2 | C17orf61  | 0.322758574 mirna_pc |
| 16766 hsa-mir-24-2 | CTNNBIP1  | 0.335766989 mirna_pc |
| 16767 hsa-mir-24-2 | CELSR1    | 0.318234797 mirna_pc |
| 16768 hsa-mir-24-2 | PARL      | 0.37884039 mirna_pc  |
| 16769 hsa-mir-24-2 | PITX2     | 0.310070644 mirna_pc |
| 16770 hsa-mir-24-2 | ALDOA     | 0.542756805 mirna_pc |
| 16771 hsa-mir-24-2 | MRPL28    | 0.571892313 mirna_pc |
| 16772 hsa-mir-24-2 | HOXA7     | 0.414923144 mirna_pc |
| 16773 hsa-mir-24-2 | NDUFC1    | 0.32071791 mirna_pc  |
| 16774 hsa-mir-24-2 | FAM43A    | 0.356710731 mirna_pc |
| 16775 hsa-mir-24-2 | BTBD6     | 0.346324181 mirna_pc |
| 16776 hsa-mir-24-2 | RDBP      | 0.326141694 mirna_pc |
| 16777 hsa-mir-24-2 | MECR      | 0.341062701 mirna_pc |
| 16778 hsa-mir-24-2 | YWHAQ     | 0.484199574 mirna_pc |
| 16779 hsa-mir-24-2 | ARPC2     | 0.403524285 mirna_pc |
| 16780 hsa-mir-24-2 | UBTD1     | 0.305278956 mirna_pc |
| 16781 hsa-mir-24-2 | PIR       | 0.39113916 mirna_pc  |
| 16782 hsa-mir-24-2 | RGS14     | 0.345259982 mirna_pc |
| 16783 hsa-mir-24-2 | MSN       | 0.301209156 mirna_pc |
| 16784 hsa-mir-24-2 | DNAJC8    | 0.384469198 mirna_pc |
| 16785 hsa-mir-24-2 | NDUFA4L2  | 0.401642326 mirna_pc |
| 16786 hsa-mir-24-2 | HAS3      | 0.321296605 mirna_pc |
| 16787 hsa-mir-24-2 | TMEM93    | 0.426089987 mirna_pc |
| 16788 hsa-mir-24-2 | KCTD1     | 0.331030908 mirna_pc |
| 16789 hsa-mir-24-2 | C19orf29  | 0.326057014 mirna_pc |
| 16790 hsa-mir-24-2 | ZFPL1     | 0.343061284 mirna_pc |
| 16791 hsa-mir-24-2 | RPL35A    | 0.45868628 mirna_pc  |
| 16792 hsa-mir-24-2 | NME1-NME2 | 0.367415263 mirna_pc |
| 16793 hsa-mir-24-2 | LGALS7    | 0.363785143 mirna_pc |

|                    |           |                      |
|--------------------|-----------|----------------------|
| 16794 hsa-mir-24-2 | KLHL17    | 0.329468255 mirna_pc |
| 16795 hsa-mir-24-2 | LOC642587 | 0.458048038 mirna_pc |
| 16796 hsa-mir-24-2 | ARL 2.00  | 0.419729222 mirna_pc |
| 16797 hsa-mir-24-2 | TMEM79    | 0.308899984 mirna_pc |
| 16798 hsa-mir-24-2 | NUDT14    | 0.341289613 mirna_pc |
| 16799 hsa-mir-24-2 | SPPL3     | 0.365434064 mirna_pc |
| 16800 hsa-mir-24-2 | COMMD1    | 0.356685007 mirna_pc |
| 16801 hsa-mir-24-2 | WDR41     | 0.304302046 mirna_pc |
| 16802 hsa-mir-24-2 | TINF2     | 0.320762538 mirna_pc |
| 16803 hsa-mir-24-2 | PTRH1     | 0.315899963 mirna_pc |
| 16804 hsa-mir-24-2 | RPS15A    | 0.386506167 mirna_pc |
| 16805 hsa-mir-24-2 | PGAP2     | 0.376992059 mirna_pc |
| 16806 hsa-mir-24-2 | UQCR10    | 0.314233491 mirna_pc |
| 16807 hsa-mir-24-2 | RPS23     | 0.32157009 mirna_pc  |
| 16808 hsa-mir-24-2 | INO80E    | 0.351068447 mirna_pc |
| 16809 hsa-mir-24-2 | IAH1      | 0.371548193 mirna_pc |
| 16810 hsa-mir-24-2 | NPRL3     | 0.395498795 mirna_pc |
| 16811 hsa-mir-24-2 | COX8A     | 0.359506157 mirna_pc |
| 16812 hsa-mir-24-2 | C16orf74  | 0.629715699 mirna_pc |
| 16813 hsa-mir-24-2 | GPR153    | 0.31913816 mirna_pc  |
| 16814 hsa-mir-24-2 | ZNF771    | 0.302000225 mirna_pc |
| 16815 hsa-mir-24-2 | RPS29     | 0.330517237 mirna_pc |
| 16816 hsa-mir-24-2 | FAM125A   | 0.380976414 mirna_pc |
| 16817 hsa-mir-24-2 | C7orf68   | 0.311062457 mirna_pc |
| 16818 hsa-mir-24-2 | ADPRHL2   | 0.30723996 mirna_pc  |
| 16819 hsa-mir-24-2 | MRPL38    | 0.318090406 mirna_pc |
| 16820 hsa-mir-24-2 | TCEB2     | 0.447601646 mirna_pc |
| 16821 hsa-mir-24-2 | FN3KRP    | 0.300360764 mirna_pc |
| 16822 hsa-mir-24-2 | MRPL55    | 0.36344938 mirna_pc  |
| 16823 hsa-mir-24-2 | SEPX1     | 0.326134526 mirna_pc |
| 16824 hsa-mir-24-2 | HSPA4     | 0.39025272 mirna_pc  |
| 16825 hsa-mir-24-2 | YBX1      | 0.365349586 mirna_pc |
| 16826 hsa-mir-24-2 | BICD2     | 0.422371151 mirna_pc |
| 16827 hsa-mir-24-2 | GJB6      | 0.349453945 mirna_pc |
| 16828 hsa-mir-24-2 | ZBTB80S   | 0.414960249 mirna_pc |
| 16829 hsa-mir-24-2 | A4GALT    | 0.30982471 mirna_pc  |
| 16830 hsa-mir-24-2 | IMPA2     | 0.351135223 mirna_pc |
| 16831 hsa-mir-24-2 | SLC6A8    | 0.362434343 mirna_pc |
| 16832 hsa-mir-24-2 | RNF181    | 0.429047423 mirna_pc |
| 16833 hsa-mir-24-2 | PPP2R3B   | 0.300148698 mirna_pc |
| 16834 hsa-mir-24-2 | C12orf10  | 0.345222547 mirna_pc |
| 16835 hsa-mir-24-2 | GIPC1     | 0.361398626 mirna_pc |
| 16836 hsa-mir-24-2 | TRIM7     | 0.485094141 mirna_pc |
| 16837 hsa-mir-24-2 | KRT14     | 0.500203844 mirna_pc |
| 16838 hsa-mir-24-2 | C12orf45  | 0.403964593 mirna_pc |
| 16839 hsa-mir-24-2 | C19orf43  | 0.442512453 mirna_pc |
| 16840 hsa-mir-24-2 | P2RY1     | 0.332531382 mirna_pc |
| 16841 hsa-mir-24-2 | PSMB6     | 0.527122887 mirna_pc |
| 16842 hsa-mir-24-2 | C19orf20  | 0.344756146 mirna_pc |
| 16843 hsa-mir-24-2 | RBX1      | 0.493865805 mirna_pc |
| 16844 hsa-mir-24-2 | UBAC1     | 0.45285572 mirna_pc  |
| 16845 hsa-mir-24-2 | GPX4      | 0.404442707 mirna_pc |
| 16846 hsa-mir-24-2 | CSDA      | 0.45702888 mirna_pc  |
| 16847 hsa-mir-24-2 | CDC42SE1  | 0.398065382 mirna_pc |

|                    |          |                      |
|--------------------|----------|----------------------|
| 16848 hsa-mir-24-2 | RPS19BP1 | 0.316086719 mirna_pc |
| 16849 hsa-mir-24-2 | MMP17    | 0.384662696 mirna_pc |
| 16850 hsa-mir-24-2 | TMEM132A | 0.325339057 mirna_pc |
| 16851 hsa-mir-24-2 | SRRM3    | 0.457665815 mirna_pc |
| 16852 hsa-mir-24-2 | TAF10    | 0.317442085 mirna_pc |
| 16853 hsa-mir-24-2 | C11orf10 | 0.302500988 mirna_pc |
| 16854 hsa-mir-24-2 | CORO1C   | 0.392704864 mirna_pc |
| 16855 hsa-mir-24-2 | PGAM1    | 0.487290086 mirna_pc |
| 16856 hsa-mir-24-2 | HSPB11   | 0.311148018 mirna_pc |
| 16857 hsa-mir-24-2 | SLC27A4  | 0.339526461 mirna_pc |
| 16858 hsa-mir-24-2 | YKT6     | 0.325487924 mirna_pc |
| 16859 hsa-mir-24-2 | TP63     | 0.447966888 mirna_pc |
| 16860 hsa-mir-24-2 | HSBP1    | 0.357636718 mirna_pc |
| 16861 hsa-mir-24-2 | POLRMT   | 0.400105986 mirna_pc |
| 16862 hsa-mir-24-2 | ATP10D   | 0.333314972 mirna_pc |
| 16863 hsa-mir-24-2 | MLST8    | 0.498030985 mirna_pc |
| 16864 hsa-mir-24-2 | C16orf13 | 0.453201205 mirna_pc |
| 16865 hsa-mir-24-2 | TMEM11   | 0.354796269 mirna_pc |
| 16866 hsa-mir-24-2 | RPL39    | 0.311446529 mirna_pc |
| 16867 hsa-mir-24-2 | SUB1     | 0.33956928 mirna_pc  |
| 16868 hsa-mir-24-2 | USP5     | 0.328824344 mirna_pc |
| 16869 hsa-mir-24-2 | BOLA3    | 0.409744263 mirna_pc |
| 16870 hsa-mir-24-2 | C19orf23 | 0.363760417 mirna_pc |
| 16871 hsa-mir-24-2 | TSKU     | 0.30926097 mirna_pc  |
| 16872 hsa-mir-24-2 | C17orf89 | 0.499568681 mirna_pc |
| 16873 hsa-mir-24-2 | PHB2     | 0.381927497 mirna_pc |
| 16874 hsa-mir-24-2 | GPS1     | 0.310406264 mirna_pc |
| 16875 hsa-mir-24-2 | RPS17    | 0.437757525 mirna_pc |
| 16876 hsa-mir-24-2 | MAPKBP1  | 0.350143495 mirna_pc |
| 16877 hsa-mir-24-2 | TRAPPC3  | 0.466035724 mirna_pc |
| 16878 hsa-mir-24-2 | SNAI2    | 0.425444726 mirna_pc |
| 16879 hsa-mir-24-2 | FAM83G   | 0.398307537 mirna_pc |
| 16880 hsa-mir-24-2 | KIAA1609 | 0.396060464 mirna_pc |
| 16881 hsa-mir-24-2 | NUDT18   | 0.303804834 mirna_pc |
| 16882 hsa-mir-24-2 | POLR2F   | 0.478805153 mirna_pc |
| 16883 hsa-mir-24-2 | MRPS24   | 0.444366576 mirna_pc |
| 16884 hsa-mir-24-2 | ARHGEF4  | 0.315949528 mirna_pc |
| 16885 hsa-mir-24-2 | ALKBH3   | 0.368385541 mirna_pc |
| 16886 hsa-mir-24-2 | MDH2     | 0.338901241 mirna_pc |
| 16887 hsa-mir-24-2 | FAM127B  | 0.50928027 mirna_pc  |
| 16888 hsa-mir-24-2 | UQCRHL   | 0.4038366 mirna_pc   |
| 16889 hsa-mir-24-2 | SSNA1    | 0.390947823 mirna_pc |
| 16890 hsa-mir-24-2 | MRPS15   | 0.58978385 mirna_pc  |
| 16891 hsa-mir-24-2 | TRAPPC5  | 0.531663594 mirna_pc |
| 16892 hsa-mir-24-2 | APRT     | 0.461212852 mirna_pc |
| 16893 hsa-mir-24-2 | RPL11    | 0.34590213 mirna_pc  |
| 16894 hsa-mir-24-2 | GDI1     | 0.313845358 mirna_pc |
| 16895 hsa-mir-24-2 | RPS20    | 0.345720622 mirna_pc |
| 16896 hsa-mir-24-2 | SPRR1B   | 0.399990073 mirna_pc |
| 16897 hsa-mir-24-2 | BAIAP2   | 0.468681963 mirna_pc |
| 16898 hsa-mir-24-2 | MRPS18C  | 0.366779281 mirna_pc |
| 16899 hsa-mir-24-2 | SOX15    | 0.601425439 mirna_pc |
| 16900 hsa-mir-24-2 | CSNK1A1  | 0.353112116 mirna_pc |
| 16901 hsa-mir-24-2 | EIF2B3   | 0.436468985 mirna_pc |

|                    |           |                      |
|--------------------|-----------|----------------------|
| 16902 hsa-mir-24-2 | BNC1      | 0.478662535 mirna_pc |
| 16903 hsa-mir-24-2 | DGCR6L    | 0.424809264 mirna_pc |
| 16904 hsa-mir-24-2 | LYRM4     | 0.397774845 mirna_pc |
| 16905 hsa-mir-24-2 | PLD2      | 0.375637427 mirna_pc |
| 16906 hsa-mir-24-2 | NDRG1     | 0.418881964 mirna_pc |
| 16907 hsa-mir-24-2 | C4orf10   | 0.308913606 mirna_pc |
| 16908 hsa-mir-24-2 | MRPS6     | 0.356839395 mirna_pc |
| 16909 hsa-mir-24-2 | NDUFA11   | 0.486949456 mirna_pc |
| 16910 hsa-mir-24-2 | CYHR1     | 0.319267874 mirna_pc |
| 16911 hsa-mir-24-2 | LASS3     | 0.375072437 mirna_pc |
| 16912 hsa-mir-24-2 | SPRR2D    | 0.344056106 mirna_pc |
| 16913 hsa-mir-24-2 | TMEM160   | 0.321855317 mirna_pc |
| 16914 hsa-mir-24-2 | TIMM8B    | 0.448240025 mirna_pc |
| 16915 hsa-mir-24-2 | MRPL41    | 0.366069714 mirna_pc |
| 16916 hsa-mir-24-2 | IRX4      | 0.356286995 mirna_pc |
| 16917 hsa-mir-24-2 | ATG4D     | 0.487876805 mirna_pc |
| 16918 hsa-mir-24-2 | MFSD3     | 0.368373319 mirna_pc |
| 16919 hsa-mir-24-2 | SLC25A11  | 0.374229693 mirna_pc |
| 16920 hsa-mir-24-2 | DPCD      | 0.305183419 mirna_pc |
| 16921 hsa-mir-24-2 | PLEKHM2   | 0.363142393 mirna_pc |
| 16922 hsa-mir-24-2 | NDUFB3    | 0.349365246 mirna_pc |
| 16923 hsa-mir-24-2 | RPS15     | 0.4695579 mirna_pc   |
| 16924 hsa-mir-24-2 | ADM       | 0.414093537 mirna_pc |
| 16925 hsa-mir-24-2 | PIN1      | 0.482597369 mirna_pc |
| 16926 hsa-mir-24-2 | NDUFB4    | 0.4218859 mirna_pc   |
| 16927 hsa-mir-24-2 | RPL18A    | 0.428179376 mirna_pc |
| 16928 hsa-mir-24-2 | MAP3K6    | 0.399039377 mirna_pc |
| 16929 hsa-mir-24-2 | ARF5      | 0.400907582 mirna_pc |
| 16930 hsa-mir-24-2 | RHOD      | 0.485496179 mirna_pc |
| 16931 hsa-mir-24-2 | C7orf10   | 0.326626559 mirna_pc |
| 16932 hsa-mir-24-2 | ATP5G2    | 0.331623369 mirna_pc |
| 16933 hsa-mir-24-2 | C19orf70  | 0.43671403 mirna_pc  |
| 16934 hsa-mir-24-2 | FAM104B   | 0.301087363 mirna_pc |
| 16935 hsa-mir-24-2 | LSM 10.00 | 0.436089894 mirna_pc |
| 16936 hsa-mir-24-2 | EIF3G     | 0.377749049 mirna_pc |
| 16937 hsa-mir-24-2 | TRAPPC2L  | 0.313263291 mirna_pc |
| 16938 hsa-mir-24-2 | PSMC5     | 0.415127575 mirna_pc |
| 16939 hsa-mir-24-2 | C2orf76   | 0.329668239 mirna_pc |
| 16940 hsa-mir-24-2 | RPL27     | 0.371385223 mirna_pc |
| 16941 hsa-mir-24-2 | UBA52     | 0.492589089 mirna_pc |
| 16942 hsa-mir-24-2 | MARK4     | 0.350537946 mirna_pc |
| 16943 hsa-mir-24-2 | PTHLH     | 0.386018339 mirna_pc |
| 16944 hsa-mir-24-2 | MBD2      | 0.446714733 mirna_pc |
| 16945 hsa-mir-24-2 | PIAS4     | 0.392838655 mirna_pc |
| 16946 hsa-mir-24-2 | CLCA2     | 0.370579556 mirna_pc |
| 16947 hsa-mir-24-2 | CALML3    | 0.418014162 mirna_pc |
| 16948 hsa-mir-24-2 | UNC45A    | 0.316367743 mirna_pc |
| 16949 hsa-mir-24-2 | C14orf166 | 0.466445301 mirna_pc |
| 16950 hsa-mir-24-2 | HS6ST2    | 0.349036117 mirna_pc |
| 16951 hsa-mir-24-2 | PHLDB3    | 0.337032073 mirna_pc |
| 16952 hsa-mir-24-2 | PTPN13    | 0.366785655 mirna_pc |
| 16953 hsa-mir-24-2 | PEX16     | 0.324687848 mirna_pc |
| 16954 hsa-mir-24-2 | NDUFC2    | 0.335024984 mirna_pc |
| 16955 hsa-mir-24-2 | HS3ST3A1  | 0.367454462 mirna_pc |

|                    |              |                      |
|--------------------|--------------|----------------------|
| 16956 hsa-mir-24-2 | RNASEH2C     | 0.318100362 mirna_pc |
| 16957 hsa-mir-24-2 | C19orf56     | 0.340090087 mirna_pc |
| 16958 hsa-mir-24-2 | FEM1A        | 0.31127248 mirna_pc  |
| 16959 hsa-mir-24-2 | UBL5         | 0.483879537 mirna_pc |
| 16960 hsa-mir-24-2 | CDC34        | 0.36901986 mirna_pc  |
| 16961 hsa-mir-24-2 | STX10        | 0.380351066 mirna_pc |
| 16962 hsa-mir-24-2 | ATRIP        | 0.332041275 mirna_pc |
| 16963 hsa-mir-24-2 | MGC70857     | 0.380038234 mirna_pc |
| 16964 hsa-mir-24-2 | EIF4H        | 0.317015884 mirna_pc |
| 16965 hsa-mir-24-2 | KCMF1        | 0.465149609 mirna_pc |
| 16966 hsa-mir-24-2 | MED31        | 0.497370058 mirna_pc |
| 16967 hsa-mir-24-2 | LSMD1        | 0.442903949 mirna_pc |
| 16968 hsa-mir-24-2 | RPS10        | 0.336451501 mirna_pc |
| 16969 hsa-mir-24-2 | GM2A         | 0.407194406 mirna_pc |
| 16970 hsa-mir-24-2 | FLYWCH2      | 0.413036336 mirna_pc |
| 16971 hsa-mir-24-2 | PLSCR3       | 0.509045851 mirna_pc |
| 16972 hsa-mir-24-2 | RAP1GDS1     | 0.335138731 mirna_pc |
| 16973 hsa-mir-24-2 | TRAPPC1      | 0.458162709 mirna_pc |
| 16974 hsa-mir-24-2 | SRP14        | 0.340350799 mirna_pc |
| 16975 hsa-mir-24-2 | TSSC4        | 0.308785517 mirna_pc |
| 16976 hsa-mir-24-2 | NDUFB9       | 0.313603601 mirna_pc |
| 16977 hsa-mir-24-2 | PARD6G       | 0.424368489 mirna_pc |
| 16978 hsa-mir-24-2 | TBCA         | 0.474836132 mirna_pc |
| 16979 hsa-mir-24-2 | CWC15        | 0.323063418 mirna_pc |
| 16980 hsa-mir-24-2 | FLYWCH1      | 0.433757898 mirna_pc |
| 16981 hsa-mir-24-2 | NXN          | 0.386327381 mirna_pc |
| 16982 hsa-mir-24-2 | LRRC8A       | 0.445511975 mirna_pc |
| 16983 hsa-mir-24-2 | ELOVL1       | 0.332644774 mirna_pc |
| 16984 hsa-mir-24-2 | ST6GALNAC2   | 0.355342585 mirna_pc |
| 16985 hsa-mir-24-2 | FKBP4        | 0.3119989 mirna_pc   |
| 16986 hsa-mir-24-2 | MYEOV2       | 0.411909225 mirna_pc |
| 16987 hsa-mir-24-2 | UBE2G1       | 0.3012833 mirna_pc   |
| 16988 hsa-mir-24-2 | PGAM4        | 0.444753915 mirna_pc |
| 16989 hsa-mir-24-2 | FAM110C      | 0.359183557 mirna_pc |
| 16990 hsa-mir-24-2 | NARFL        | 0.314909159 mirna_pc |
| 16991 hsa-mir-24-2 | ATP5H        | 0.53821633 mirna_pc  |
| 16992 hsa-mir-24-2 | NRG1         | 0.362472564 mirna_pc |
| 16993 hsa-mir-24-2 | BPGM         | 0.325462589 mirna_pc |
| 16994 hsa-mir-24-2 | PMF1         | 0.320952642 mirna_pc |
| 16995 hsa-mir-24-2 | TMEM159      | 0.324618677 mirna_pc |
| 16996 hsa-mir-24-2 | C5orf55      | 0.464755452 mirna_pc |
| 16997 hsa-mir-24-2 | GALNT14      | 0.310695494 mirna_pc |
| 16998 hsa-mir-24-2 | NTAN1        | 0.401303731 mirna_pc |
| 16999 hsa-mir-24-2 | FAM128B      | 0.353187928 mirna_pc |
| 17000 hsa-mir-24-2 | HINT1        | 0.486095828 mirna_pc |
| 17001 hsa-mir-24-2 | GALNTL4      | 0.349235738 mirna_pc |
| 17002 hsa-mir-24-2 | AFAP1L1      | 0.347447157 mirna_pc |
| 17003 hsa-mir-24-2 | NDUFA12      | 0.521219951 mirna_pc |
| 17004 hsa-mir-24-2 | PPP2R2C      | 0.414709181 mirna_pc |
| 17005 hsa-mir-24-2 | DRG2         | 0.339446406 mirna_pc |
| 17006 hsa-mir-24-2 | PTS          | 0.391933419 mirna_pc |
| 17007 hsa-mir-24-2 | C19orf50     | 0.425185752 mirna_pc |
| 17008 hsa-mir-24-2 | LOC100134229 | 0.399474211 mirna_pc |
| 17009 hsa-mir-24-2 | CXCL14       | 0.378530131 mirna_pc |

|       |              |          |             |          |
|-------|--------------|----------|-------------|----------|
| 17010 | hsa-mir-24-2 | PL-5283  | 0.382804456 | mirna_pc |
| 17011 | hsa-mir-24-2 | HCFC1R1  | 0.446248893 | mirna_pc |
| 17012 | hsa-mir-24-2 | ZDHC8    | 0.315091525 | mirna_pc |
| 17013 | hsa-mir-24-2 | RPS27A   | 0.356824804 | mirna_pc |
| 17014 | hsa-mir-24-2 | OST4     | 0.500767553 | mirna_pc |
| 17015 | hsa-mir-24-2 | PPPDE2   | 0.386865243 | mirna_pc |
| 17016 | hsa-mir-24-2 | Clorf50  | 0.343493469 | mirna_pc |
| 17017 | hsa-mir-24-2 | RPLP0    | 0.421979437 | mirna_pc |
| 17018 | hsa-mir-24-2 | VPS28    | 0.392969674 | mirna_pc |
| 17019 | hsa-mir-24-2 | EXTL3    | 0.3265632   | mirna_pc |
| 17020 | hsa-mir-24-2 | MRPL20   | 0.330124825 | mirna_pc |
| 17021 | hsa-mir-24-2 | CCBL1    | 0.316326501 | mirna_pc |
| 17022 | hsa-mir-24-2 | EPS15L1  | 0.378439001 | mirna_pc |
| 17023 | hsa-mir-24-2 | TMEM18   | 0.300776344 | mirna_pc |
| 17024 | hsa-mir-24-2 | NIPAL4   | 0.357877987 | mirna_pc |
| 17025 | hsa-mir-24-2 | SEMA3F   | 0.317586057 | mirna_pc |
| 17026 | hsa-mir-24-2 | RPL31    | 0.302591577 | mirna_pc |
| 17027 | hsa-mir-24-2 | COX6A1   | 0.330103235 | mirna_pc |
| 17028 | hsa-mir-24-2 | C19orf26 | 0.343961933 | mirna_pc |
| 17029 | hsa-mir-24-2 | XAB2     | 0.312289828 | mirna_pc |
| 17030 | hsa-mir-24-2 | PRNP     | 0.31388155  | mirna_pc |
| 17031 | hsa-mir-24-2 | PCYT1A   | 0.37644698  | mirna_pc |
| 17032 | hsa-mir-24-2 | NUBP2    | 0.455925103 | mirna_pc |
| 17033 | hsa-mir-24-2 | SHARPIN  | 0.428808719 | mirna_pc |
| 17034 | hsa-mir-24-2 | BTF3     | 0.38073061  | mirna_pc |
| 17035 | hsa-mir-24-2 | CEACAM19 | 0.307394681 | mirna_pc |
| 17036 | hsa-mir-24-2 | UBE2D2   | 0.439577411 | mirna_pc |
| 17037 | hsa-mir-24-2 | SGTA     | 0.391126689 | mirna_pc |
| 17038 | hsa-mir-24-2 | TRAF3IP2 | 0.365380463 | mirna_pc |
| 17039 | hsa-mir-24-2 | BTBD2    | 0.430325705 | mirna_pc |
| 17040 | hsa-mir-24-2 | BDKRB1   | 0.34165261  | mirna_pc |
| 17041 | hsa-mir-24-2 | POLR2L   | 0.546047468 | mirna_pc |
| 17042 | hsa-mir-24-2 | RPS4X    | 0.308773782 | mirna_pc |
| 17043 | hsa-mir-24-2 | SYPL1    | 0.315948451 | mirna_pc |
| 17044 | hsa-mir-24-2 | MAFB     | 0.313405285 | mirna_pc |
| 17045 | hsa-mir-24-2 | PACSLN3  | 0.479947457 | mirna_pc |
| 17046 | hsa-mir-24-2 | VKORC1   | 0.337943257 | mirna_pc |
| 17047 | hsa-mir-24-2 | RPS8     | 0.352042671 | mirna_pc |
| 17048 | hsa-mir-24-2 | PPP2R4   | 0.402102311 | mirna_pc |
| 17049 | hsa-mir-24-2 | C8orf58  | 0.339367053 | mirna_pc |
| 17050 | hsa-mir-24-2 | C16orf42 | 0.528809374 | mirna_pc |
| 17051 | hsa-mir-24-2 | SF3B5    | 0.411121477 | mirna_pc |
| 17052 | hsa-mir-24-2 | RAB1B    | 0.473175946 | mirna_pc |
| 17053 | hsa-mir-24-2 | LTA4H    | 0.315527814 | mirna_pc |
| 17054 | hsa-mir-24-2 | ACTG1    | 0.336652829 | mirna_pc |
| 17055 | hsa-mir-24-2 | HSPA4L   | 0.320676499 | mirna_pc |
| 17056 | hsa-mir-24-2 | SNAPC2   | 0.361651809 | mirna_pc |
| 17057 | hsa-mir-24-2 | GOT2     | 0.349276008 | mirna_pc |
| 17058 | hsa-mir-24-2 | MIB2     | 0.42664773  | mirna_pc |
| 17059 | hsa-mir-24-2 | TMEM85   | 0.315735346 | mirna_pc |
| 17060 | hsa-mir-24-2 | Clorf128 | 0.305634882 | mirna_pc |
| 17061 | hsa-mir-24-2 | CCDC127  | 0.367853999 | mirna_pc |
| 17062 | hsa-mir-24-2 | CHMP6    | 0.3335797   | mirna_pc |
| 17063 | hsa-mir-24-2 | ATP6VOC  | 0.459765417 | mirna_pc |



|                    |               |                      |
|--------------------|---------------|----------------------|
| 17064 hsa-mir-24-2 | NACA          | 0.415506132 mirna_pc |
| 17065 hsa-mir-24-2 | PHLDA3        | 0.414399801 mirna_pc |
| 17066 hsa-mir-24-2 | ALDOC         | 0.302366128 mirna_pc |
| 17067 hsa-mir-24-2 | FAM131C       | 0.323061549 mirna_pc |
| 17068 hsa-mir-24-2 | C19orf25      | 0.302990645 mirna_pc |
| 17069 hsa-mir-24-2 | CYC1          | 0.371457612 mirna_pc |
| 17070 hsa-mir-24-2 | RASL11B       | 0.30658808 mirna_pc  |
| 17071 hsa-mir-24-2 | SNX3          | 0.332425383 mirna_pc |
| 17072 hsa-mir-24-2 | C17orf106     | 0.438337747 mirna_pc |
| 17073 hsa-mir-24-2 | DNAJA3        | 0.374390748 mirna_pc |
| 17074 hsa-mir-24-2 | RPS12         | 0.363945002 mirna_pc |
| 17075 hsa-mir-24-2 | PPARD         | 0.32509268 mirna_pc  |
| 17076 hsa-mir-24-2 | POLE4         | 0.446525456 mirna_pc |
| 17077 hsa-mir-24-2 | JMJD7-PLA2G4B | 0.321016167 mirna_pc |
| 17078 hsa-mir-24-2 | NDE1          | 0.316818873 mirna_pc |
| 17079 hsa-mir-24-2 | PTPMT1        | 0.320972377 mirna_pc |
| 17080 hsa-mir-24-2 | NACA2         | 0.397472304 mirna_pc |
| 17081 hsa-mir-24-2 | DGCR6         | 0.351866769 mirna_pc |
| 17082 hsa-mir-24-2 | BDH1          | 0.328600274 mirna_pc |
| 17083 hsa-mir-24-2 | DHRS4L2       | 0.410879076 mirna_pc |
| 17084 hsa-mir-24-2 | RPL24         | 0.418499215 mirna_pc |
| 17085 hsa-mir-24-2 | MIF4GD        | 0.317352861 mirna_pc |
| 17086 hsa-mir-24-2 | RPL36         | 0.384603531 mirna_pc |
| 17087 hsa-mir-24-2 | RPL4          | 0.377759265 mirna_pc |
| 17088 hsa-mir-24-2 | TXNDC17       | 0.531895409 mirna_pc |
| 17089 hsa-mir-24-2 | FST           | 0.397483868 mirna_pc |
| 17090 hsa-mir-24-2 | C21orf56      | 0.307664407 mirna_pc |
| 17091 hsa-mir-24-2 | MMAB          | 0.326111538 mirna_pc |
| 17092 hsa-mir-24-2 | DNAJC19       | 0.334350252 mirna_pc |
| 17093 hsa-mir-24-2 | DHPS          | 0.302377352 mirna_pc |
| 17094 hsa-mir-24-2 | TMEM134       | 0.480116122 mirna_pc |
| 17095 hsa-mir-24-2 | TBX1          | 0.328806117 mirna_pc |
| 17096 hsa-mir-24-2 | ARL4D         | 0.39708694 mirna_pc  |
| 17097 hsa-mir-24-2 | PFDN1         | 0.42288654 mirna_pc  |
| 17098 hsa-mir-24-2 | TBL3          | 0.444713663 mirna_pc |
| 17099 hsa-mir-24-2 | MRPS7         | 0.381387796 mirna_pc |
| 17100 hsa-mir-24-2 | RPL13         | 0.324840652 mirna_pc |
| 17101 hsa-mir-24-2 | ODZ2          | 0.343910014 mirna_pc |
| 17102 hsa-mir-24-2 | C1orf122      | 0.336147724 mirna_pc |
| 17103 hsa-mir-24-2 | ZNF205        | 0.362659299 mirna_pc |
| 17104 hsa-mir-24-2 | UBE2L3        | 0.406956804 mirna_pc |
| 17105 hsa-mir-24-2 | RAB24         | 0.311007643 mirna_pc |
| 17106 hsa-mir-24-2 | MPV17L2       | 0.303321216 mirna_pc |
| 17107 hsa-mir-24-2 | PSMD9         | 0.559566528 mirna_pc |
| 17108 hsa-mir-24-2 | FAM126A       | 0.302634089 mirna_pc |
| 17109 hsa-mir-24-2 | OAZ1          | 0.498655392 mirna_pc |
| 17110 hsa-mir-24-2 | TIMM44        | 0.446214344 mirna_pc |
| 17111 hsa-mir-24-2 | MOBK12A       | 0.450753193 mirna_pc |
| 17112 hsa-mir-24-2 | COMTD1        | 0.354735619 mirna_pc |
| 17113 hsa-mir-24-2 | NDUFA7        | 0.392729338 mirna_pc |
| 17114 hsa-mir-24-2 | FRMD6         | 0.305482621 mirna_pc |
| 17115 hsa-mir-24-2 | COPS7A        | 0.388573144 mirna_pc |
| 17116 hsa-mir-24-2 | NDUFS5        | 0.300774813 mirna_pc |
| 17117 hsa-mir-24-2 | ERCC1         | 0.437058794 mirna_pc |

|                    |            |                      |
|--------------------|------------|----------------------|
| 17118 hsa-mir-24-2 | LOC407835  | 0.403239407 mirna_pc |
| 17119 hsa-mir-24-2 | CLPP       | 0.403633201 mirna_pc |
| 17120 hsa-mir-24-2 | HDAC3      | 0.374780308 mirna_pc |
| 17121 hsa-mir-24-2 | COPE       | 0.425826942 mirna_pc |
| 17122 hsa-mir-24-2 | PC         | 0.434959466 mirna_pc |
| 17123 hsa-mir-24-2 | DULLARD    | 0.380475424 mirna_pc |
| 17124 hsa-mir-24-2 | CCDC94     | 0.392128317 mirna_pc |
| 17125 hsa-mir-24-2 | RPL10A     | 0.372696963 mirna_pc |
| 17126 hsa-mir-24-2 | CNBP       | 0.333362931 mirna_pc |
| 17127 hsa-mir-24-2 | TUBB6      | 0.417696888 mirna_pc |
| 17128 hsa-mir-24-2 | Clorf201   | 0.469495398 mirna_pc |
| 17129 hsa-mir-24-2 | MRPL22     | 0.324270771 mirna_pc |
| 17130 hsa-mir-24-2 | RIC8A      | 0.381973947 mirna_pc |
| 17131 hsa-mir-24-2 | CETN3      | 0.416546036 mirna_pc |
| 17132 hsa-mir-24-2 | CINP       | 0.447491976 mirna_pc |
| 17133 hsa-mir-24-2 | NUDT22     | 0.384324888 mirna_pc |
| 17134 hsa-mir-24-2 | COPZ2      | 0.324660298 mirna_pc |
| 17135 hsa-mir-24-2 | STK17A     | 0.304806348 mirna_pc |
| 17136 hsa-mir-24-2 | SNX17      | 0.40611828 mirna_pc  |
| 17137 hsa-mir-24-2 | FAU        | 0.460838288 mirna_pc |
| 17138 hsa-mir-24-2 | SRP68      | 0.404111986 mirna_pc |
| 17139 hsa-mir-24-2 | AP3S1      | 0.42602705 mirna_pc  |
| 17140 hsa-mir-24-2 | CDKN2AIPNL | 0.320519404 mirna_pc |
| 17141 hsa-mir-24-2 | IMP3       | 0.423798088 mirna_pc |
| 17142 hsa-mir-24-2 | GLI4       | 0.389227605 mirna_pc |
| 17143 hsa-mir-24-2 | LOH12CR1   | 0.395734192 mirna_pc |
| 17144 hsa-mir-24-2 | CA12       | 0.435181419 mirna_pc |
| 17145 hsa-mir-24-2 | EXOSC6     | 0.389331319 mirna_pc |
| 17146 hsa-mir-24-2 | PLRG1      | 0.30972856 mirna_pc  |
| 17147 hsa-mir-24-2 | MAP7D1     | 0.415027159 mirna_pc |
| 17148 hsa-mir-24-2 | EFS        | 0.357253915 mirna_pc |
| 17149 hsa-mir-24-2 | LMNA       | 0.300997606 mirna_pc |
| 17150 hsa-mir-24-2 | RILPL1     | 0.345561347 mirna_pc |
| 17151 hsa-mir-24-2 | MPZL2      | 0.345766697 mirna_pc |
| 17152 hsa-mir-24-2 | EIF3D      | 0.353502246 mirna_pc |
| 17153 hsa-mir-24-2 | FDX1L      | 0.381896502 mirna_pc |
| 17154 hsa-mir-24-2 | GYS1       | 0.306517019 mirna_pc |
| 17155 hsa-mir-24-2 | THAP11     | 0.302346804 mirna_pc |
| 17156 hsa-mir-24-2 | RPL10      | 0.351136764 mirna_pc |
| 17157 hsa-mir-24-2 | REPS1      | 0.309865418 mirna_pc |
| 17158 hsa-mir-24-2 | VDAC2      | 0.542894605 mirna_pc |
| 17159 hsa-mir-24-2 | BLVRA      | 0.329180596 mirna_pc |
| 17160 hsa-mir-24-2 | NEFL       | 0.340582176 mirna_pc |
| 17161 hsa-mir-24-2 | NDUFB5     | 0.356888532 mirna_pc |
| 17162 hsa-mir-24-2 | ZMAT2      | 0.306747343 mirna_pc |
| 17163 hsa-mir-24-2 | BCL7C      | 0.487637979 mirna_pc |
| 17164 hsa-mir-24-2 | PIGY       | 0.324872958 mirna_pc |
| 17165 hsa-mir-24-2 | POLR2E     | 0.603757916 mirna_pc |
| 17166 hsa-mir-24-2 | C14orf2    | 0.401128291 mirna_pc |
| 17167 hsa-mir-24-2 | IMPDH1     | 0.358167573 mirna_pc |
| 17168 hsa-mir-24-2 | RPS6KB2    | 0.389788448 mirna_pc |
| 17169 hsa-mir-24-2 | RTN4       | 0.329132395 mirna_pc |
| 17170 hsa-mir-24-2 | GLRX5      | 0.322582951 mirna_pc |
| 17171 hsa-mir-24-2 | MINK1      | 0.306910835 mirna_pc |

|                    |           |                      |
|--------------------|-----------|----------------------|
| 17172 hsa-mir-24-2 | TRNAU1AP  | 0.35572127 mirna_pc  |
| 17173 hsa-mir-24-2 | PPP2CA    | 0.386043106 mirna_pc |
| 17174 hsa-mir-24-2 | SNRNP25   | 0.438069032 mirna_pc |
| 17175 hsa-mir-24-2 | ARL2BP    | 0.329603226 mirna_pc |
| 17176 hsa-mir-24-2 | HDDC2     | 0.419074813 mirna_pc |
| 17177 hsa-mir-24-2 | INO80C    | 0.379190017 mirna_pc |
| 17178 hsa-mir-24-2 | SLC25A28  | 0.355980337 mirna_pc |
| 17179 hsa-mir-24-2 | RPLP1     | 0.385241145 mirna_pc |
| 17180 hsa-mir-24-2 | ATP6V0E1  | 0.337854844 mirna_pc |
| 17181 hsa-mir-24-2 | ELOF1     | 0.470176254 mirna_pc |
| 17182 hsa-mir-24-2 | PEF1      | 0.411166896 mirna_pc |
| 17183 hsa-mir-24-2 | RABGGTA   | 0.340623275 mirna_pc |
| 17184 hsa-mir-24-2 | RPL7A     | 0.344566967 mirna_pc |
| 17185 hsa-mir-24-2 | GPS2      | 0.36618473 mirna_pc  |
| 17186 hsa-mir-24-2 | HHLA3     | 0.320965039 mirna_pc |
| 17187 hsa-mir-24-2 | C21orf119 | 0.329893003 mirna_pc |
| 17188 hsa-mir-24-2 | MPG       | 0.375925579 mirna_pc |
| 17189 hsa-mir-24-2 | RPL26     | 0.394314691 mirna_pc |
| 17190 hsa-mir-24-2 | SLC10A6   | 0.316661003 mirna_pc |
| 17191 hsa-mir-24-2 | RAB40C    | 0.322304009 mirna_pc |
| 17192 hsa-mir-24-2 | FAM89B    | 0.422098373 mirna_pc |
| 17193 hsa-mir-24-2 | DGCR14    | 0.310559753 mirna_pc |
| 17194 hsa-mir-24-2 | MRPL23    | 0.311635621 mirna_pc |
| 17195 hsa-mir-24-2 | H2AFY2    | 0.346795694 mirna_pc |
| 17196 hsa-mir-24-2 | MAF 1.00  | 0.385995931 mirna_pc |
| 17197 hsa-mir-24-2 | TSPO      | 0.334199993 mirna_pc |
| 17198 hsa-mir-24-2 | MRPL40    | 0.438537862 mirna_pc |
| 17199 hsa-mir-24-2 | FAM127A   | 0.366763867 mirna_pc |
| 17200 hsa-mir-24-2 | UBL7      | 0.339477411 mirna_pc |
| 17201 hsa-mir-24-2 | RHOT2     | 0.319343727 mirna_pc |
| 17202 hsa-mir-24-2 | SCYL1     | 0.301786581 mirna_pc |
| 17203 hsa-mir-24-2 | BRD7      | 0.375562755 mirna_pc |
| 17204 hsa-mir-24-2 | MVK       | 0.362037326 mirna_pc |
| 17205 hsa-mir-24-2 | RNH1      | 0.400239497 mirna_pc |
| 17206 hsa-mir-24-2 | NOL3      | 0.337614839 mirna_pc |
| 17207 hsa-mir-24-2 | SYTL1     | 0.397897556 mirna_pc |
| 17208 hsa-mir-24-2 | HMG20B    | 0.36011955 mirna_pc  |
| 17209 hsa-mir-24-2 | VPS29     | 0.363696087 mirna_pc |
| 17210 hsa-mir-24-2 | KCTD11    | 0.354123613 mirna_pc |
| 17211 hsa-mir-24-2 | HYAL3     | 0.348338233 mirna_pc |
| 17212 hsa-mir-24-2 | GNB2L1    | 0.330360403 mirna_pc |
| 17213 hsa-mir-24-2 | C9orf3    | 0.383169721 mirna_pc |
| 17214 hsa-mir-24-2 | TAX1BP3   | 0.335907065 mirna_pc |
| 17215 hsa-mir-24-2 | C21orf70  | 0.363648638 mirna_pc |
| 17216 hsa-mir-24-2 | NQO2      | 0.322540083 mirna_pc |
| 17217 hsa-mir-24-2 | SETD8     | 0.363966311 mirna_pc |
| 17218 hsa-mir-24-2 | UQCRH     | 0.3521279 mirna_pc   |
| 17219 hsa-mir-24-2 | MGST2     | 0.326813403 mirna_pc |
| 17220 hsa-mir-24-2 | ZCCHC17   | 0.321340114 mirna_pc |
| 17221 hsa-mir-24-2 | MRPL53    | 0.497163574 mirna_pc |
| 17222 hsa-mir-24-2 | LOC554202 | 0.349021326 mirna_pc |
| 17223 hsa-mir-24-2 | EEF1D     | 0.439399844 mirna_pc |
| 17224 hsa-mir-24-2 | C1orf212  | 0.409479407 mirna_pc |
| 17225 hsa-mir-24-2 | COPS3     | 0.417374117 mirna_pc |

|                    |           |                      |
|--------------------|-----------|----------------------|
| 17226 hsa-mir-24-2 | UBE2F     | 0.342633489 mirna_pc |
| 17227 hsa-mir-24-2 | COMT      | 0.312075496 mirna_pc |
| 17228 hsa-mir-24-2 | USE1      | 0.421236005 mirna_pc |
| 17229 hsa-mir-24-2 | NDUFS8    | 0.428829461 mirna_pc |
| 17230 hsa-mir-24-2 | AURKAIP1  | 0.339880886 mirna_pc |
| 17231 hsa-mir-24-2 | FEZ1      | 0.332806927 mirna_pc |
| 17232 hsa-mir-24-2 | NUDC      | 0.303487106 mirna_pc |
| 17233 hsa-mir-24-2 | MAP2K2    | 0.452401223 mirna_pc |
| 17234 hsa-mir-24-2 | RPL6      | 0.321336098 mirna_pc |
| 17235 hsa-mir-24-2 | RRAS2     | 0.446689425 mirna_pc |
| 17236 hsa-mir-24-2 | TIMM22    | 0.457281752 mirna_pc |
| 17237 hsa-mir-24-2 | CHCHD5    | 0.34432194 mirna_pc  |
| 17238 hsa-mir-24-2 | ZNF414    | 0.394571612 mirna_pc |
| 17239 hsa-mir-24-2 | C15orf61  | 0.323758867 mirna_pc |
| 17240 hsa-mir-24-2 | PI4K2A    | 0.334218452 mirna_pc |
| 17241 hsa-mir-24-2 | E4F1      | 0.408243907 mirna_pc |
| 17242 hsa-mir-24-2 | HAX1      | 0.35224177 mirna_pc  |
| 17243 hsa-mir-24-2 | EPN2      | 0.31786513 mirna_pc  |
| 17244 hsa-mir-24-2 | PPIF      | 0.452210798 mirna_pc |
| 17245 hsa-mir-24-2 | LOC143666 | 0.419857927 mirna_pc |
| 17246 hsa-mir-24-2 | NMRAL1    | 0.483430114 mirna_pc |
| 17247 hsa-mir-24-2 | CSDAP1    | 0.420089764 mirna_pc |
| 17248 hsa-mir-24-2 | AHNAK2    | 0.319566342 mirna_pc |
| 17249 hsa-mir-188  | HOXC9     | 0.381088185 mirna_pc |
| 17250 hsa-mir-188  | CDC25C    | 0.349094577 mirna_pc |
| 17251 hsa-mir-188  | SGOL1     | 0.322079299 mirna_pc |
| 17252 hsa-mir-188  | IQGAP3    | 0.31543623 mirna_pc  |
| 17253 hsa-mir-188  | HOXC11    | 0.348207471 mirna_pc |
| 17254 hsa-mir-188  | DDX39     | 0.322509809 mirna_pc |
| 17255 hsa-mir-188  | FANCB     | 0.311698275 mirna_pc |
| 17256 hsa-mir-188  | AURKA     | 0.35625081 mirna_pc  |
| 17257 hsa-mir-188  | C12orf48  | 0.3263782 mirna_pc   |
| 17258 hsa-mir-188  | ZWINT     | 0.36504959 mirna_pc  |
| 17259 hsa-mir-188  | PIF1      | 0.344071674 mirna_pc |
| 17260 hsa-mir-188  | E2F1      | 0.302836937 mirna_pc |
| 17261 hsa-mir-188  | DEPDC1B   | 0.314372911 mirna_pc |
| 17262 hsa-mir-188  | CLDN7     | 0.31107048 mirna_pc  |
| 17263 hsa-mir-188  | PSMC4     | 0.339356455 mirna_pc |
| 17264 hsa-mir-188  | HOXC10    | 0.362709675 mirna_pc |
| 17265 hsa-mir-188  | TOMM40    | 0.309719344 mirna_pc |
| 17266 hsa-mir-188  | CDC25A    | 0.32788802 mirna_pc  |
| 17267 hsa-mir-188  | CLN6      | 0.306263829 mirna_pc |
| 17268 hsa-mir-188  | XK        | 0.348036727 mirna_pc |
| 17269 hsa-mir-188  | MARCKSL1  | 0.360363806 mirna_pc |
| 17270 hsa-mir-188  | ACAD8     | 0.313013518 mirna_pc |
| 17271 hsa-mir-188  | CBX8      | 0.302278376 mirna_pc |
| 17272 hsa-mir-188  | PAFAH1B3  | 0.364799439 mirna_pc |
| 17273 hsa-mir-188  | ST14      | 0.34934805 mirna_pc  |
| 17274 hsa-mir-188  | MARVELD3  | 0.307705251 mirna_pc |
| 17275 hsa-mir-188  | PPAP2C    | 0.320560297 mirna_pc |
| 17276 hsa-mir-188  | ETV4      | 0.306144038 mirna_pc |
| 17277 hsa-mir-188  | CHRNA5    | 0.343824525 mirna_pc |
| 17278 hsa-mir-188  | TLCD1     | 0.317664836 mirna_pc |
| 17279 hsa-mir-188  | C2orf88   | 0.336948276 mirna_pc |

|                   |          |                      |
|-------------------|----------|----------------------|
| 17280 hsa-mir-188 | HSPBP1   | 0.332634926 mirna_pc |
| 17281 hsa-mir-188 | SNX8     | 0.3425361 mirna_pc   |
| 17282 hsa-mir-188 | SLC5A6   | 0.310271546 mirna_pc |
| 17283 hsa-mir-188 | TUSC2    | 0.329238435 mirna_pc |
| 17284 hsa-mir-188 | AHCY     | 0.339861109 mirna_pc |
| 17285 hsa-mir-188 | PDSS1    | 0.324740738 mirna_pc |
| 17286 hsa-mir-188 | PDHA1    | 0.35250422 mirna_pc  |
| 17287 hsa-mir-188 | OBFC2B   | 0.316836347 mirna_pc |
| 17288 hsa-mir-188 | PTMA     | 0.349209056 mirna_pc |
| 17289 hsa-mir-188 | LSM 4.00 | 0.381278979 mirna_pc |
| 17290 hsa-mir-188 | ELK1     | 0.31215222 mirna_pc  |
| 17291 hsa-mir-188 | RRP9     | 0.330154987 mirna_pc |
| 17292 hsa-mir-188 | SVIP     | 0.336693381 mirna_pc |
| 17293 hsa-mir-188 | EPCAM    | 0.403898997 mirna_pc |
| 17294 hsa-mir-188 | CTSA     | 0.312312597 mirna_pc |
| 17295 hsa-mir-188 | PDRG1    | 0.317480987 mirna_pc |
| 17296 hsa-mir-188 | ANG      | 0.321188381 mirna_pc |
| 17297 hsa-mir-188 | SLC35A2  | 0.521727989 mirna_pc |
| 17298 hsa-mir-188 | SAE1     | 0.334587947 mirna_pc |
| 17299 hsa-mir-188 | MRPL17   | 0.376409458 mirna_pc |
| 17300 hsa-mir-188 | EIF2S2   | 0.304927467 mirna_pc |
| 17301 hsa-mir-188 | TSEN54   | 0.402394214 mirna_pc |
| 17302 hsa-mir-188 | HPDL     | 0.356172011 mirna_pc |
| 17303 hsa-mir-188 | ABHD11   | 0.302069393 mirna_pc |
| 17304 hsa-mir-188 | ARFIP2   | 0.303307439 mirna_pc |
| 17305 hsa-mir-188 | ATAD3A   | 0.33135736 mirna_pc  |
| 17306 hsa-mir-188 | SMS      | 0.33302682 mirna_pc  |
| 17307 hsa-mir-188 | CDX2     | 0.327375746 mirna_pc |
| 17308 hsa-mir-188 | ASCL2    | 0.30898323 mirna_pc  |
| 17309 hsa-mir-188 | BRI3BP   | 0.393884102 mirna_pc |
| 17310 hsa-mir-188 | UBE4A    | 0.313410096 mirna_pc |
| 17311 hsa-mir-188 | UCA1     | 0.353838238 mirna_pc |
| 17312 hsa-mir-188 | CAPS     | 0.381117703 mirna_pc |
| 17313 hsa-mir-188 | AP1M2    | 0.349464486 mirna_pc |
| 17314 hsa-mir-188 | AGMAT    | 0.462194049 mirna_pc |
| 17315 hsa-mir-188 | ERAL1    | 0.304023095 mirna_pc |
| 17316 hsa-mir-188 | C2orf29  | 0.308769182 mirna_pc |
| 17317 hsa-mir-188 | C19orf24 | 0.300362144 mirna_pc |
| 17318 hsa-mir-188 | ZNF444   | 0.333903333 mirna_pc |
| 17319 hsa-mir-188 | POLR3K   | 0.336816507 mirna_pc |
| 17320 hsa-mir-188 | FAM96A   | 0.321018986 mirna_pc |
| 17321 hsa-mir-188 | FGFR10P  | 0.31470985 mirna_pc  |
| 17322 hsa-mir-188 | EBP      | 0.427048202 mirna_pc |
| 17323 hsa-mir-188 | PHB      | 0.319025312 mirna_pc |
| 17324 hsa-mir-188 | MID1IP1  | 0.335807976 mirna_pc |
| 17325 hsa-mir-188 | TIMM50   | 0.309032078 mirna_pc |
| 17326 hsa-mir-188 | IL22RA1  | 0.395812365 mirna_pc |
| 17327 hsa-mir-188 | DDOST    | 0.340315488 mirna_pc |
| 17328 hsa-mir-188 | MXD3     | 0.304113704 mirna_pc |
| 17329 hsa-mir-188 | GK3P     | 0.312942606 mirna_pc |
| 17330 hsa-mir-188 | CDK16    | 0.307275965 mirna_pc |
| 17331 hsa-mir-188 | ATAD3B   | 0.321449418 mirna_pc |
| 17332 hsa-mir-188 | C11orf48 | 0.432627484 mirna_pc |
| 17333 hsa-mir-188 | C8orf55  | 0.325058627 mirna_pc |

|                   |           |                      |
|-------------------|-----------|----------------------|
| 17334 hsa-mir-188 | NFKB1B    | 0.359190128 mirna_pc |
| 17335 hsa-mir-188 | FAM136A   | 0.403629178 mirna_pc |
| 17336 hsa-mir-188 | BAIAP2L2  | 0.325577045 mirna_pc |
| 17337 hsa-mir-188 | CHCHD8    | 0.332099888 mirna_pc |
| 17338 hsa-mir-188 | GIPC2     | 0.32627063 mirna_pc  |
| 17339 hsa-mir-188 | GNL3L     | 0.301473134 mirna_pc |
| 17340 hsa-mir-188 | KRT18     | 0.416392006 mirna_pc |
| 17341 hsa-mir-188 | STRA13    | 0.422652141 mirna_pc |
| 17342 hsa-mir-188 | CXorf38   | 0.311993054 mirna_pc |
| 17343 hsa-mir-188 | TMEM126A  | 0.368712821 mirna_pc |
| 17344 hsa-mir-188 | TMEM98    | 0.329496467 mirna_pc |
| 17345 hsa-mir-188 | SLC27A2   | 0.363928084 mirna_pc |
| 17346 hsa-mir-188 | ALG8      | 0.367512369 mirna_pc |
| 17347 hsa-mir-188 | FUNDC1    | 0.320521581 mirna_pc |
| 17348 hsa-mir-188 | TMEM180   | 0.325009155 mirna_pc |
| 17349 hsa-mir-188 | TMEM106C  | 0.311004932 mirna_pc |
| 17350 hsa-mir-188 | CRLS1     | 0.3356797 mirna_pc   |
| 17351 hsa-mir-188 | C11orf83  | 0.379735194 mirna_pc |
| 17352 hsa-mir-188 | UBA1      | 0.349034636 mirna_pc |
| 17353 hsa-mir-188 | GTF2A2    | 0.303179193 mirna_pc |
| 17354 hsa-mir-188 | RNF34     | 0.366434219 mirna_pc |
| 17355 hsa-mir-188 | C14orf176 | 0.363817863 mirna_pc |
| 17356 hsa-mir-188 | RPGR      | 0.37523677 mirna_pc  |
| 17357 hsa-mir-188 | ZNF593    | 0.363682688 mirna_pc |
| 17358 hsa-mir-188 | CYP2W1    | 0.349153901 mirna_pc |
| 17359 hsa-mir-188 | WDR45     | 0.345001981 mirna_pc |
| 17360 hsa-mir-188 | REEP6     | 0.338112046 mirna_pc |
| 17361 hsa-mir-188 | DDAH1     | 0.320744318 mirna_pc |
| 17362 hsa-mir-188 | LYPLA2    | 0.35505424 mirna_pc  |
| 17363 hsa-mir-188 | NOSIP     | 0.30347703 mirna_pc  |
| 17364 hsa-mir-188 | ATP5L     | 0.341315482 mirna_pc |
| 17365 hsa-mir-188 | NAPRT1    | 0.354883398 mirna_pc |
| 17366 hsa-mir-188 | KRTCAP3   | 0.316939933 mirna_pc |
| 17367 hsa-mir-188 | COMMD7    | 0.323201959 mirna_pc |
| 17368 hsa-mir-188 | SORD      | 0.375152642 mirna_pc |
| 17369 hsa-mir-188 | ICA1      | 0.317803265 mirna_pc |
| 17370 hsa-mir-188 | SSBP4     | 0.319579342 mirna_pc |
| 17371 hsa-mir-188 | PRELID1   | 0.310544089 mirna_pc |
| 17372 hsa-mir-188 | CLDN3     | 0.382800619 mirna_pc |
| 17373 hsa-mir-188 | METTL7B   | 0.42351228 mirna_pc  |
| 17374 hsa-mir-188 | NSMCE4A   | 0.311868599 mirna_pc |
| 17375 hsa-mir-188 | ZNF30     | 0.346482921 mirna_pc |
| 17376 hsa-mir-188 | C19orf10  | 0.315169135 mirna_pc |
| 17377 hsa-mir-188 | SLC25A19  | 0.380591547 mirna_pc |
| 17378 hsa-mir-188 | BEND3     | 0.304708898 mirna_pc |
| 17379 hsa-mir-188 | SH3KBP1   | 0.310326855 mirna_pc |
| 17380 hsa-mir-188 | CA5BP     | 0.354418636 mirna_pc |
| 17381 hsa-mir-188 | FZD5      | 0.315288512 mirna_pc |
| 17382 hsa-mir-188 | FGFR4     | 0.41486214 mirna_pc  |
| 17383 hsa-mir-188 | LOC151534 | 0.324579887 mirna_pc |
| 17384 hsa-mir-188 | ASS1      | 0.348936339 mirna_pc |
| 17385 hsa-mir-188 | C7orf36   | 0.355810162 mirna_pc |
| 17386 hsa-mir-188 | SARS2     | 0.319225244 mirna_pc |
| 17387 hsa-mir-188 | PQBP1     | 0.418018379 mirna_pc |

|                   |          |                      |
|-------------------|----------|----------------------|
| 17388 hsa-mir-188 | NDUFA3   | 0.368525758 mirna_pc |
| 17389 hsa-mir-188 | C6orf130 | 0.300382637 mirna_pc |
| 17390 hsa-mir-188 | ZSCAN16  | 0.327816221 mirna_pc |
| 17391 hsa-mir-188 | RPS6KA3  | 0.3016873 mirna_pc   |
| 17392 hsa-mir-188 | DGAT1    | 0.347993361 mirna_pc |
| 17393 hsa-mir-188 | SYAP1    | 0.373494338 mirna_pc |
| 17394 hsa-mir-188 | ACAA2    | 0.308237828 mirna_pc |
| 17395 hsa-mir-188 | CHDH     | 0.300880599 mirna_pc |
| 17396 hsa-mir-188 | TMEM54   | 0.326197093 mirna_pc |
| 17397 hsa-mir-188 | GJB1     | 0.438775873 mirna_pc |
| 17398 hsa-mir-188 | ERGIC3   | 0.334766421 mirna_pc |
| 17399 hsa-mir-188 | MSL3     | 0.323990174 mirna_pc |
| 17400 hsa-mir-188 | TIMM17B  | 0.421222358 mirna_pc |
| 17401 hsa-mir-188 | C20orf54 | 0.307784966 mirna_pc |
| 17402 hsa-mir-188 | CDH17    | 0.343643316 mirna_pc |
| 17403 hsa-mir-188 | HDHD3    | 0.302782306 mirna_pc |
| 17404 hsa-mir-188 | C11orf10 | 0.313163706 mirna_pc |
| 17405 hsa-mir-188 | ZNF259   | 0.474007451 mirna_pc |
| 17406 hsa-mir-188 | SSU72    | 0.323222433 mirna_pc |
| 17407 hsa-mir-188 | ALG14    | 0.306179202 mirna_pc |
| 17408 hsa-mir-188 | GLYCTK   | 0.319730953 mirna_pc |
| 17409 hsa-mir-188 | DDAH2    | 0.345085471 mirna_pc |
| 17410 hsa-mir-188 | SIGIRR   | 0.306561442 mirna_pc |
| 17411 hsa-mir-188 | CCDC22   | 0.313883653 mirna_pc |
| 17412 hsa-mir-188 | GET4     | 0.325416393 mirna_pc |
| 17413 hsa-mir-188 | DPAGT1   | 0.336205708 mirna_pc |
| 17414 hsa-mir-188 | PDDC1    | 0.324036279 mirna_pc |
| 17415 hsa-mir-188 | NARS2    | 0.387951196 mirna_pc |
| 17416 hsa-mir-188 | DGAT2    | 0.384178684 mirna_pc |
| 17417 hsa-mir-188 | TMEM62   | 0.314243196 mirna_pc |
| 17418 hsa-mir-188 | BSG      | 0.301303474 mirna_pc |
| 17419 hsa-mir-188 | FUCA2    | 0.337905607 mirna_pc |
| 17420 hsa-mir-188 | EPS8L3   | 0.313196693 mirna_pc |
| 17421 hsa-mir-188 | C11orf75 | 0.370726201 mirna_pc |
| 17422 hsa-mir-188 | TP53I11  | 0.310714912 mirna_pc |
| 17423 hsa-mir-188 | NDUFS3   | 0.323024664 mirna_pc |
| 17424 hsa-mir-188 | ZNF195   | 0.30764987 mirna_pc  |
| 17425 hsa-mir-188 | ZW10     | 0.307604985 mirna_pc |
| 17426 hsa-mir-188 | LGALS4   | 0.336614733 mirna_pc |
| 17427 hsa-mir-188 | SCML1    | 0.306283821 mirna_pc |
| 17428 hsa-mir-188 | MANF     | 0.331412751 mirna_pc |
| 17429 hsa-mir-188 | HYLS1    | 0.321266952 mirna_pc |
| 17430 hsa-mir-188 | SDF2L1   | 0.32497482 mirna_pc  |
| 17431 hsa-mir-188 | STT3A    | 0.315838819 mirna_pc |
| 17432 hsa-mir-188 | C1orf93  | 0.383777437 mirna_pc |
| 17433 hsa-mir-188 | VIL1     | 0.30590928 mirna_pc  |
| 17434 hsa-mir-188 | SPCS2    | 0.356373475 mirna_pc |
| 17435 hsa-mir-188 | NDUFC2   | 0.45805036 mirna_pc  |
| 17436 hsa-mir-188 | GLT25D2  | 0.3021217 mirna_pc   |
| 17437 hsa-mir-188 | PHF16    | 0.429889678 mirna_pc |
| 17438 hsa-mir-188 | POF1B    | 0.320704132 mirna_pc |
| 17439 hsa-mir-188 | BUD13    | 0.424403946 mirna_pc |
| 17440 hsa-mir-188 | GMDS     | 0.304006668 mirna_pc |
| 17441 hsa-mir-188 | CMC1     | 0.304822521 mirna_pc |

|                   |                |                      |
|-------------------|----------------|----------------------|
| 17442 hsa-mir-188 | FCGRT          | 0.322683406 mirna_pc |
| 17443 hsa-mir-188 | MORC4          | 0.326893941 mirna_pc |
| 17444 hsa-mir-188 | FOXA2          | 0.400479793 mirna_pc |
| 17445 hsa-mir-188 | SERPINB6       | 0.383140272 mirna_pc |
| 17446 hsa-mir-188 | OTUD3          | 0.351325032 mirna_pc |
| 17447 hsa-mir-188 | GDF15          | 0.464405883 mirna_pc |
| 17448 hsa-mir-188 | GMPPA          | 0.33959412 mirna_pc  |
| 17449 hsa-mir-188 | CAMK2N1        | 0.372565676 mirna_pc |
| 17450 hsa-mir-188 | TMEM53         | 0.349327731 mirna_pc |
| 17451 hsa-mir-188 | USH1C          | 0.40504251 mirna_pc  |
| 17452 hsa-mir-188 | RNF157         | 0.32223323 mirna_pc  |
| 17453 hsa-mir-188 | CALML4         | 0.315248424 mirna_pc |
| 17454 hsa-mir-188 | CCDC84         | 0.330391417 mirna_pc |
| 17455 hsa-mir-188 | SLC25A33       | 0.449447274 mirna_pc |
| 17456 hsa-mir-188 | CRB3           | 0.35576762 mirna_pc  |
| 17457 hsa-mir-188 | C2orf72        | 0.410022223 mirna_pc |
| 17458 hsa-mir-188 | CTPS2          | 0.371424286 mirna_pc |
| 17459 hsa-mir-188 | KIF9           | 0.369482406 mirna_pc |
| 17460 hsa-mir-188 | MRPL20         | 0.354671611 mirna_pc |
| 17461 hsa-mir-188 | AGR2           | 0.318906723 mirna_pc |
| 17462 hsa-mir-188 | NDUFB11        | 0.42904494 mirna_pc  |
| 17463 hsa-mir-188 | HNF1A          | 0.364646494 mirna_pc |
| 17464 hsa-mir-188 | KRT8           | 0.394236722 mirna_pc |
| 17465 hsa-mir-188 | PDX1           | 0.360615967 mirna_pc |
| 17466 hsa-mir-188 | OCLN           | 0.354419924 mirna_pc |
| 17467 hsa-mir-188 | C20orf118      | 0.310428437 mirna_pc |
| 17468 hsa-mir-188 | CYB561D2       | 0.325631052 mirna_pc |
| 17469 hsa-mir-188 | CYCS           | 0.322085242 mirna_pc |
| 17470 hsa-mir-188 | ZNF823         | 0.30966455 mirna_pc  |
| 17471 hsa-mir-188 | PRR13          | 0.338314149 mirna_pc |
| 17472 hsa-mir-188 | ID2            | 0.338174805 mirna_pc |
| 17473 hsa-mir-188 | SLC35D2        | 0.330221101 mirna_pc |
| 17474 hsa-mir-188 | CLCN5          | 0.492627057 mirna_pc |
| 17475 hsa-mir-188 | XYLB           | 0.304761599 mirna_pc |
| 17476 hsa-mir-188 | TOE1           | 0.33773172 mirna_pc  |
| 17477 hsa-mir-188 | SLC40A1        | 0.327073494 mirna_pc |
| 17478 hsa-mir-188 | SLC04A1        | 0.317273023 mirna_pc |
| 17479 hsa-mir-188 | ERBB3          | 0.387790528 mirna_pc |
| 17480 hsa-mir-188 | SEMA4G         | 0.325667008 mirna_pc |
| 17481 hsa-mir-188 | LOC653566      | 0.302179444 mirna_pc |
| 17482 hsa-mir-188 | CCNI2          | 0.355170963 mirna_pc |
| 17483 hsa-mir-188 | DKFZp686024166 | 0.320058593 mirna_pc |
| 17484 hsa-mir-188 | GLB1L2         | 0.362010608 mirna_pc |
| 17485 hsa-mir-188 | ADAP1          | 0.335082256 mirna_pc |
| 17486 hsa-mir-188 | ZNF787         | 0.365096839 mirna_pc |
| 17487 hsa-mir-188 | TMEM51         | 0.327286039 mirna_pc |
| 17488 hsa-mir-188 | CALM3          | 0.381697775 mirna_pc |
| 17489 hsa-mir-188 | STX3           | 0.322712713 mirna_pc |
| 17490 hsa-mir-188 | CCDC72         | 0.339921702 mirna_pc |
| 17491 hsa-mir-188 | RBM3           | 0.323733253 mirna_pc |
| 17492 hsa-mir-188 | IL17RB         | 0.34453368 mirna_pc  |
| 17493 hsa-mir-188 | PKDCC          | 0.308805156 mirna_pc |
| 17494 hsa-mir-188 | TMEM126B       | 0.33531964 mirna_pc  |
| 17495 hsa-mir-188 | GPKOW          | 0.470650703 mirna_pc |



|                     |          |                      |
|---------------------|----------|----------------------|
| 17496 hsa-mir-188   | CD320    | 0.316260097 mirna_pc |
| 17497 hsa-mir-188   | C2orf34  | 0.337392105 mirna_pc |
| 17498 hsa-mir-188   | PVRL2    | 0.394170513 mirna_pc |
| 17499 hsa-mir-188   | PREB     | 0.40321278 mirna_pc  |
| 17500 hsa-mir-188   | ZNF443   | 0.431372267 mirna_pc |
| 17501 hsa-mir-188   | LLGL2    | 0.354835602 mirna_pc |
| 17502 hsa-mir-188   | PIN4     | 0.315635146 mirna_pc |
| 17503 hsa-mir-188   | SSR2     | 0.32419671 mirna_pc  |
| 17504 hsa-mir-188   | HDAC6    | 0.307074753 mirna_pc |
| 17505 hsa-mir-188   | PNKD     | 0.383301583 mirna_pc |
| 17506 hsa-mir-188   | SMPDL3B  | 0.306645841 mirna_pc |
| 17507 hsa-mir-188   | PRDX4    | 0.359664402 mirna_pc |
| 17508 hsa-mir-188   | GCHFR    | 0.373932339 mirna_pc |
| 17509 hsa-mir-188   | ZNF799   | 0.376449968 mirna_pc |
| 17510 hsa-mir-188   | UXT      | 0.404719629 mirna_pc |
| 17511 hsa-mir-188   | RBBP7    | 0.340591785 mirna_pc |
| 17512 hsa-mir-188   | ACSL5    | 0.331770855 mirna_pc |
| 17513 hsa-mir-188   | PCBD1    | 0.375880122 mirna_pc |
| 17514 hsa-mir-188   | ZNF468   | 0.42420449 mirna_pc  |
| 17515 hsa-mir-188   | TSTA3    | 0.328195717 mirna_pc |
| 17516 hsa-mir-188   | SLC37A4  | 0.357757219 mirna_pc |
| 17517 hsa-mir-188   | EIF2S3   | 0.437812599 mirna_pc |
| 17518 hsa-mir-188   | TMEM45B  | 0.335010845 mirna_pc |
| 17519 hsa-mir-188   | CENPV    | 0.432003977 mirna_pc |
| 17520 hsa-mir-188   | ANKRD49  | 0.301169793 mirna_pc |
| 17521 hsa-mir-188   | AURKAIP1 | 0.329822473 mirna_pc |
| 17522 hsa-mir-188   | FAM156A  | 0.342592221 mirna_pc |
| 17523 hsa-mir-188   | HCCS     | 0.37448235 mirna_pc  |
| 17524 hsa-mir-188   | PARK7    | 0.333872168 mirna_pc |
| 17525 hsa-mir-188   | PRELID2  | 0.322066011 mirna_pc |
| 17526 hsa-mir-188   | ARSE     | 0.44664183 mirna_pc  |
| 17527 hsa-mir-92a-2 | MKI67    | 0.309865455 mirna_pc |
| 17528 hsa-mir-92a-2 | TPX2     | 0.364258635 mirna_pc |
| 17529 hsa-mir-92a-2 | KIF4B    | 0.305498323 mirna_pc |
| 17530 hsa-mir-92a-2 | TOP2A    | 0.41503287 mirna_pc  |
| 17531 hsa-mir-92a-2 | KPNA2    | 0.357544758 mirna_pc |
| 17532 hsa-mir-92a-2 | CENPF    | 0.436294397 mirna_pc |
| 17533 hsa-mir-92a-2 | RCC2     | 0.408187647 mirna_pc |
| 17534 hsa-mir-92a-2 | HOXC9    | 0.332768298 mirna_pc |
| 17535 hsa-mir-92a-2 | KIF11    | 0.394664509 mirna_pc |
| 17536 hsa-mir-92a-2 | FOXM1    | 0.30288228 mirna_pc  |
| 17537 hsa-mir-92a-2 | RRM2     | 0.379202613 mirna_pc |
| 17538 hsa-mir-92a-2 | SPC24    | 0.348922625 mirna_pc |
| 17539 hsa-mir-92a-2 | CDK1     | 0.377716595 mirna_pc |
| 17540 hsa-mir-92a-2 | CDC25C   | 0.317407521 mirna_pc |
| 17541 hsa-mir-92a-2 | MYBL2    | 0.386156524 mirna_pc |
| 17542 hsa-mir-92a-2 | PLK1     | 0.34305804 mirna_pc  |
| 17543 hsa-mir-92a-2 | PCNA     | 0.324925613 mirna_pc |
| 17544 hsa-mir-92a-2 | UBE2C    | 0.355055516 mirna_pc |
| 17545 hsa-mir-92a-2 | BUB1     | 0.406004795 mirna_pc |
| 17546 hsa-mir-92a-2 | NUSAP1   | 0.353424334 mirna_pc |
| 17547 hsa-mir-92a-2 | MCM4     | 0.378717353 mirna_pc |
| 17548 hsa-mir-92a-2 | KIFC1    | 0.364642628 mirna_pc |
| 17549 hsa-mir-92a-2 | BUB1B    | 0.423976366 mirna_pc |

|                     |           |                      |
|---------------------|-----------|----------------------|
| 17550 hsa-mir-92a-2 | HDGF      | 0.35881285 mirna_pc  |
| 17551 hsa-mir-92a-2 | KIF18B    | 0.432791347 mirna_pc |
| 17552 hsa-mir-92a-2 | ASPM      | 0.349917911 mirna_pc |
| 17553 hsa-mir-92a-2 | CKAP2     | 0.434894833 mirna_pc |
| 17554 hsa-mir-92a-2 | FAM72A    | 0.311185522 mirna_pc |
| 17555 hsa-mir-92a-2 | KIF2C     | 0.341734673 mirna_pc |
| 17556 hsa-mir-92a-2 | FANCA     | 0.468477066 mirna_pc |
| 17557 hsa-mir-92a-2 | NCAPG     | 0.421385229 mirna_pc |
| 17558 hsa-mir-92a-2 | CLSPN     | 0.32951136 mirna_pc  |
| 17559 hsa-mir-92a-2 | SGOL1     | 0.372858816 mirna_pc |
| 17560 hsa-mir-92a-2 | ARHGAP11A | 0.380396674 mirna_pc |
| 17561 hsa-mir-92a-2 | CCNA2     | 0.464224107 mirna_pc |
| 17562 hsa-mir-92a-2 | CDC25B    | 0.321688705 mirna_pc |
| 17563 hsa-mir-92a-2 | CBX3      | 0.340356709 mirna_pc |
| 17564 hsa-mir-92a-2 | SPC25     | 0.437265341 mirna_pc |
| 17565 hsa-mir-92a-2 | NUP62     | 0.338281947 mirna_pc |
| 17566 hsa-mir-92a-2 | FANCI     | 0.414440831 mirna_pc |
| 17567 hsa-mir-92a-2 | LMNB2     | 0.300510204 mirna_pc |
| 17568 hsa-mir-92a-2 | NEK2      | 0.479412807 mirna_pc |
| 17569 hsa-mir-92a-2 | MND1      | 0.403874731 mirna_pc |
| 17570 hsa-mir-92a-2 | KIF22     | 0.374962108 mirna_pc |
| 17571 hsa-mir-92a-2 | DDX39     | 0.312911881 mirna_pc |
| 17572 hsa-mir-92a-2 | NCAPH     | 0.48069301 mirna_pc  |
| 17573 hsa-mir-92a-2 | GTSE1     | 0.423850598 mirna_pc |
| 17574 hsa-mir-92a-2 | RAD54L    | 0.437296883 mirna_pc |
| 17575 hsa-mir-92a-2 | CENPA     | 0.392020695 mirna_pc |
| 17576 hsa-mir-92a-2 | MAD2L1    | 0.536622325 mirna_pc |
| 17577 hsa-mir-92a-2 | TIMELESS  | 0.453214196 mirna_pc |
| 17578 hsa-mir-92a-2 | LMNB1     | 0.428791349 mirna_pc |
| 17579 hsa-mir-92a-2 | ASF1B     | 0.34246607 mirna_pc  |
| 17580 hsa-mir-92a-2 | CDCA8     | 0.416284061 mirna_pc |
| 17581 hsa-mir-92a-2 | TROAP     | 0.36409296 mirna_pc  |
| 17582 hsa-mir-92a-2 | CDCA5     | 0.386036853 mirna_pc |
| 17583 hsa-mir-92a-2 | TACC3     | 0.315685506 mirna_pc |
| 17584 hsa-mir-92a-2 | XPO1      | 0.461718109 mirna_pc |
| 17585 hsa-mir-92a-2 | CDC45     | 0.403681102 mirna_pc |
| 17586 hsa-mir-92a-2 | STMN1     | 0.353645046 mirna_pc |
| 17587 hsa-mir-92a-2 | CENPM     | 0.342811114 mirna_pc |
| 17588 hsa-mir-92a-2 | EXO1      | 0.333620727 mirna_pc |
| 17589 hsa-mir-92a-2 | CDCA2     | 0.31052379 mirna_pc  |
| 17590 hsa-mir-92a-2 | HMGAI     | 0.304623982 mirna_pc |
| 17591 hsa-mir-92a-2 | DKC1      | 0.344850926 mirna_pc |
| 17592 hsa-mir-92a-2 | UBE2T     | 0.385162912 mirna_pc |
| 17593 hsa-mir-92a-2 | CKS1B     | 0.380181222 mirna_pc |
| 17594 hsa-mir-92a-2 | TUBB      | 0.310471834 mirna_pc |
| 17595 hsa-mir-92a-2 | MCM2      | 0.414130805 mirna_pc |
| 17596 hsa-mir-92a-2 | KIF4A     | 0.306450246 mirna_pc |
| 17597 hsa-mir-92a-2 | ORC1L     | 0.348500378 mirna_pc |
| 17598 hsa-mir-92a-2 | SNRPB     | 0.374928667 mirna_pc |
| 17599 hsa-mir-92a-2 | KNTC1     | 0.399353609 mirna_pc |
| 17600 hsa-mir-92a-2 | UHRF1     | 0.377490138 mirna_pc |
| 17601 hsa-mir-92a-2 | CCNF      | 0.33418244 mirna_pc  |
| 17602 hsa-mir-92a-2 | PTBP1     | 0.351606431 mirna_pc |
| 17603 hsa-mir-92a-2 | CCNB2     | 0.318598568 mirna_pc |

|                     |          |                      |
|---------------------|----------|----------------------|
| 17604 hsa-mir-92a-2 | NUF2     | 0.403228637 mirna_pc |
| 17605 hsa-mir-92a-2 | PLK4     | 0.480495804 mirna_pc |
| 17606 hsa-mir-92a-2 | FANCB    | 0.386428235 mirna_pc |
| 17607 hsa-mir-92a-2 | KIF18A   | 0.345071674 mirna_pc |
| 17608 hsa-mir-92a-2 | DEPDC1   | 0.331104709 mirna_pc |
| 17609 hsa-mir-92a-2 | SKA3     | 0.523068211 mirna_pc |
| 17610 hsa-mir-92a-2 | KIF14    | 0.358185966 mirna_pc |
| 17611 hsa-mir-92a-2 | HJURP    | 0.494362833 mirna_pc |
| 17612 hsa-mir-92a-2 | SKA1     | 0.31486092 mirna_pc  |
| 17613 hsa-mir-92a-2 | RAD51    | 0.337795084 mirna_pc |
| 17614 hsa-mir-92a-2 | BLM      | 0.466714151 mirna_pc |
| 17615 hsa-mir-92a-2 | NME1     | 0.40086011 mirna_pc  |
| 17616 hsa-mir-92a-2 | DNMT1    | 0.402647887 mirna_pc |
| 17617 hsa-mir-92a-2 | PAICS    | 0.524178253 mirna_pc |
| 17618 hsa-mir-92a-2 | CCDC150  | 0.399851801 mirna_pc |
| 17619 hsa-mir-92a-2 | BIRC5    | 0.339745502 mirna_pc |
| 17620 hsa-mir-92a-2 | RCC1     | 0.348962791 mirna_pc |
| 17621 hsa-mir-92a-2 | LIG1     | 0.382787097 mirna_pc |
| 17622 hsa-mir-92a-2 | OIP5     | 0.313305194 mirna_pc |
| 17623 hsa-mir-92a-2 | DTL      | 0.488375407 mirna_pc |
| 17624 hsa-mir-92a-2 | EME1     | 0.493392349 mirna_pc |
| 17625 hsa-mir-92a-2 | RECQL4   | 0.402860355 mirna_pc |
| 17626 hsa-mir-92a-2 | CENPK    | 0.358951281 mirna_pc |
| 17627 hsa-mir-92a-2 | AURKB    | 0.338293291 mirna_pc |
| 17628 hsa-mir-92a-2 | GSG2     | 0.355585633 mirna_pc |
| 17629 hsa-mir-92a-2 | CDT1     | 0.388695075 mirna_pc |
| 17630 hsa-mir-92a-2 | CBFB     | 0.321952385 mirna_pc |
| 17631 hsa-mir-92a-2 | MCM10    | 0.40432271 mirna_pc  |
| 17632 hsa-mir-92a-2 | SGOL2    | 0.378290589 mirna_pc |
| 17633 hsa-mir-92a-2 | CHEK2    | 0.412688738 mirna_pc |
| 17634 hsa-mir-92a-2 | CENPE    | 0.36129643 mirna_pc  |
| 17635 hsa-mir-92a-2 | POLQ     | 0.422254673 mirna_pc |
| 17636 hsa-mir-92a-2 | KIF15    | 0.355451128 mirna_pc |
| 17637 hsa-mir-92a-2 | CDCA3    | 0.369670433 mirna_pc |
| 17638 hsa-mir-92a-2 | C1orf112 | 0.428543912 mirna_pc |
| 17639 hsa-mir-92a-2 | GINS1    | 0.436743208 mirna_pc |
| 17640 hsa-mir-92a-2 | FEN1     | 0.409411503 mirna_pc |
| 17641 hsa-mir-92a-2 | TRAIP    | 0.407172 mirna_pc    |
| 17642 hsa-mir-92a-2 | ORC6L    | 0.429357236 mirna_pc |
| 17643 hsa-mir-92a-2 | ERH      | 0.305113683 mirna_pc |
| 17644 hsa-mir-92a-2 | C16orf59 | 0.448610011 mirna_pc |
| 17645 hsa-mir-92a-2 | C17orf53 | 0.317121822 mirna_pc |
| 17646 hsa-mir-92a-2 | RAE1     | 0.342927157 mirna_pc |
| 17647 hsa-mir-92a-2 | FAM72D   | 0.327085546 mirna_pc |
| 17648 hsa-mir-92a-2 | FAM72B   | 0.354178199 mirna_pc |
| 17649 hsa-mir-92a-2 | EZH2     | 0.455413359 mirna_pc |
| 17650 hsa-mir-92a-2 | NEIL3    | 0.445484312 mirna_pc |
| 17651 hsa-mir-92a-2 | MCM7     | 0.303165107 mirna_pc |
| 17652 hsa-mir-92a-2 | POLD1    | 0.481294088 mirna_pc |
| 17653 hsa-mir-92a-2 | C12orf48 | 0.404539244 mirna_pc |
| 17654 hsa-mir-92a-2 | HNRNPL   | 0.404240518 mirna_pc |
| 17655 hsa-mir-92a-2 | TTK      | 0.316647435 mirna_pc |
| 17656 hsa-mir-92a-2 | ZWINT    | 0.403773858 mirna_pc |
| 17657 hsa-mir-92a-2 | TUBA1B   | 0.328119956 mirna_pc |

|                     |           |                      |
|---------------------|-----------|----------------------|
| 17658 hsa-mir-92a-2 | RUVBL1    | 0.372878084 mirna_pc |
| 17659 hsa-mir-92a-2 | HOXC6     | 0.332763829 mirna_pc |
| 17660 hsa-mir-92a-2 | BUB3      | 0.35948853 mirna_pc  |
| 17661 hsa-mir-92a-2 | HELLS     | 0.410610722 mirna_pc |
| 17662 hsa-mir-92a-2 | POLE2     | 0.324288744 mirna_pc |
| 17663 hsa-mir-92a-2 | UBE2S     | 0.329042243 mirna_pc |
| 17664 hsa-mir-92a-2 | NCAPD2    | 0.320163536 mirna_pc |
| 17665 hsa-mir-92a-2 | HNRNPC    | 0.409870125 mirna_pc |
| 17666 hsa-mir-92a-2 | ILF2      | 0.373314403 mirna_pc |
| 17667 hsa-mir-92a-2 | TCF3      | 0.454813134 mirna_pc |
| 17668 hsa-mir-92a-2 | C6orf167  | 0.343309413 mirna_pc |
| 17669 hsa-mir-92a-2 | CHEK1     | 0.388631006 mirna_pc |
| 17670 hsa-mir-92a-2 | BRCA1     | 0.419034815 mirna_pc |
| 17671 hsa-mir-92a-2 | TFRC      | 0.31897493 mirna_pc  |
| 17672 hsa-mir-92a-2 | MCM5      | 0.326007382 mirna_pc |
| 17673 hsa-mir-92a-2 | HNRNPA2B1 | 0.409861296 mirna_pc |
| 17674 hsa-mir-92a-2 | RAN       | 0.314086274 mirna_pc |
| 17675 hsa-mir-92a-2 | TYMS      | 0.344491741 mirna_pc |
| 17676 hsa-mir-92a-2 | RFWD3     | 0.479232798 mirna_pc |
| 17677 hsa-mir-92a-2 | MCM6      | 0.517713516 mirna_pc |
| 17678 hsa-mir-92a-2 | CDC6      | 0.417542593 mirna_pc |
| 17679 hsa-mir-92a-2 | CDCA7     | 0.458709177 mirna_pc |
| 17680 hsa-mir-92a-2 | EPR1      | 0.382346572 mirna_pc |
| 17681 hsa-mir-92a-2 | BRIP1     | 0.359986934 mirna_pc |
| 17682 hsa-mir-92a-2 | PIF1      | 0.328496877 mirna_pc |
| 17683 hsa-mir-92a-2 | H2AFX     | 0.327999438 mirna_pc |
| 17684 hsa-mir-92a-2 | SFRS2     | 0.366702317 mirna_pc |
| 17685 hsa-mir-92a-2 | DCAF13    | 0.32494455 mirna_pc  |
| 17686 hsa-mir-92a-2 | MTHFD1L   | 0.319205556 mirna_pc |
| 17687 hsa-mir-92a-2 | UCK2      | 0.422475117 mirna_pc |
| 17688 hsa-mir-92a-2 | EFTUD2    | 0.379497683 mirna_pc |
| 17689 hsa-mir-92a-2 | THOC4     | 0.329471118 mirna_pc |
| 17690 hsa-mir-92a-2 | NFKBIL2   | 0.375947235 mirna_pc |
| 17691 hsa-mir-92a-2 | C15orf42  | 0.36865966 mirna_pc  |
| 17692 hsa-mir-92a-2 | PTGES3    | 0.300173814 mirna_pc |
| 17693 hsa-mir-92a-2 | PRIM2     | 0.357024954 mirna_pc |
| 17694 hsa-mir-92a-2 | FAM60A    | 0.411756831 mirna_pc |
| 17695 hsa-mir-92a-2 | FAM64A    | 0.356565197 mirna_pc |
| 17696 hsa-mir-92a-2 | ATAD5     | 0.383410034 mirna_pc |
| 17697 hsa-mir-92a-2 | RANBP1    | 0.391488868 mirna_pc |
| 17698 hsa-mir-92a-2 | E2F1      | 0.375460042 mirna_pc |
| 17699 hsa-mir-92a-2 | SNRPG     | 0.327021396 mirna_pc |
| 17700 hsa-mir-92a-2 | TH1L      | 0.332315059 mirna_pc |
| 17701 hsa-mir-92a-2 | MCM3      | 0.322602587 mirna_pc |
| 17702 hsa-mir-92a-2 | SNRPA     | 0.431732163 mirna_pc |
| 17703 hsa-mir-92a-2 | FUS       | 0.381687776 mirna_pc |
| 17704 hsa-mir-92a-2 | DNAJC9    | 0.324833999 mirna_pc |
| 17705 hsa-mir-92a-2 | U2AF2     | 0.308028711 mirna_pc |
| 17706 hsa-mir-92a-2 | RFC3      | 0.522559088 mirna_pc |
| 17707 hsa-mir-92a-2 | CHAF1A    | 0.321368974 mirna_pc |
| 17708 hsa-mir-92a-2 | DEPDC1B   | 0.32737648 mirna_pc  |
| 17709 hsa-mir-92a-2 | CENPO     | 0.517455375 mirna_pc |
| 17710 hsa-mir-92a-2 | XRCC2     | 0.458985157 mirna_pc |
| 17711 hsa-mir-92a-2 | C19orf48  | 0.443899989 mirna_pc |

|                     |          |                      |
|---------------------|----------|----------------------|
| 17712 hsa-mir-92a-2 | BRCA2    | 0.389453874 mirna_pc |
| 17713 hsa-mir-92a-2 | CENPL    | 0.336803318 mirna_pc |
| 17714 hsa-mir-92a-2 | GEN1     | 0.418489468 mirna_pc |
| 17715 hsa-mir-92a-2 | NUDT1    | 0.332102818 mirna_pc |
| 17716 hsa-mir-92a-2 | HMGB2    | 0.50401403 mirna_pc  |
| 17717 hsa-mir-92a-2 | GINS2    | 0.423291952 mirna_pc |
| 17718 hsa-mir-92a-2 | DNA2     | 0.425703169 mirna_pc |
| 17719 hsa-mir-92a-2 | NOP56    | 0.49002303 mirna_pc  |
| 17720 hsa-mir-92a-2 | SNHG1    | 0.358950008 mirna_pc |
| 17721 hsa-mir-92a-2 | CSE1L    | 0.325373936 mirna_pc |
| 17722 hsa-mir-92a-2 | DTYMK    | 0.459309351 mirna_pc |
| 17723 hsa-mir-92a-2 | TMEM206  | 0.331187977 mirna_pc |
| 17724 hsa-mir-92a-2 | PRMT1    | 0.427533177 mirna_pc |
| 17725 hsa-mir-92a-2 | MLF1IP   | 0.390387562 mirna_pc |
| 17726 hsa-mir-92a-2 | RAVER1   | 0.392876965 mirna_pc |
| 17727 hsa-mir-92a-2 | HEATR1   | 0.321702715 mirna_pc |
| 17728 hsa-mir-92a-2 | HSPE1    | 0.305122976 mirna_pc |
| 17729 hsa-mir-92a-2 | C16orf75 | 0.356519935 mirna_pc |
| 17730 hsa-mir-92a-2 | NOP2     | 0.302245894 mirna_pc |
| 17731 hsa-mir-92a-2 | CAD      | 0.453887562 mirna_pc |
| 17732 hsa-mir-92a-2 | ZFP64    | 0.381577552 mirna_pc |
| 17733 hsa-mir-92a-2 | CCDC99   | 0.378799885 mirna_pc |
| 17734 hsa-mir-92a-2 | CDK2     | 0.396475404 mirna_pc |
| 17735 hsa-mir-92a-2 | CDK4     | 0.432409073 mirna_pc |
| 17736 hsa-mir-92a-2 | CKAP5    | 0.323366204 mirna_pc |
| 17737 hsa-mir-92a-2 | CHTF18   | 0.344447743 mirna_pc |
| 17738 hsa-mir-92a-2 | HNRNPR   | 0.350881706 mirna_pc |
| 17739 hsa-mir-92a-2 | DLEU2    | 0.390093559 mirna_pc |
| 17740 hsa-mir-92a-2 | PRIM1    | 0.391220466 mirna_pc |
| 17741 hsa-mir-92a-2 | KAT2A    | 0.372186429 mirna_pc |
| 17742 hsa-mir-92a-2 | CENPH    | 0.384950495 mirna_pc |
| 17743 hsa-mir-92a-2 | FERMT1   | 0.340641563 mirna_pc |
| 17744 hsa-mir-92a-2 | TCOF1    | 0.368560348 mirna_pc |
| 17745 hsa-mir-92a-2 | CHAF1B   | 0.392952722 mirna_pc |
| 17746 hsa-mir-92a-2 | DHX34    | 0.346560136 mirna_pc |
| 17747 hsa-mir-92a-2 | NCAPG2   | 0.363124717 mirna_pc |
| 17748 hsa-mir-92a-2 | MSH2     | 0.454099192 mirna_pc |
| 17749 hsa-mir-92a-2 | PRPF19   | 0.341259432 mirna_pc |
| 17750 hsa-mir-92a-2 | EIF3B    | 0.311018274 mirna_pc |
| 17751 hsa-mir-92a-2 | TOMM40   | 0.300307574 mirna_pc |
| 17752 hsa-mir-92a-2 | EIF2AK1  | 0.310363588 mirna_pc |
| 17753 hsa-mir-92a-2 | SF3B3    | 0.479530667 mirna_pc |
| 17754 hsa-mir-92a-2 | CDC7     | 0.416431561 mirna_pc |
| 17755 hsa-mir-92a-2 | INTS7    | 0.339075742 mirna_pc |
| 17756 hsa-mir-92a-2 | SSB      | 0.428447468 mirna_pc |
| 17757 hsa-mir-92a-2 | PUS1     | 0.422661344 mirna_pc |
| 17758 hsa-mir-92a-2 | NOL11    | 0.421723706 mirna_pc |
| 17759 hsa-mir-92a-2 | RFC4     | 0.383576685 mirna_pc |
| 17760 hsa-mir-92a-2 | FBX05    | 0.384246138 mirna_pc |
| 17761 hsa-mir-92a-2 | FIGNL1   | 0.327248035 mirna_pc |
| 17762 hsa-mir-92a-2 | E2F3     | 0.431646861 mirna_pc |
| 17763 hsa-mir-92a-2 | DDX11    | 0.389295309 mirna_pc |
| 17764 hsa-mir-92a-2 | RUVBL2   | 0.374057664 mirna_pc |
| 17765 hsa-mir-92a-2 | CDC25A   | 0.462654679 mirna_pc |

|                     |           |                      |
|---------------------|-----------|----------------------|
| 17766 hsa-mir-92a-2 | TOPBP1    | 0.362649475 mirna_pc |
| 17767 hsa-mir-92a-2 | RAD54B    | 0.34329275 mirna_pc  |
| 17768 hsa-mir-92a-2 | OTX1      | 0.388128583 mirna_pc |
| 17769 hsa-mir-92a-2 | PRKDC     | 0.31751187 mirna_pc  |
| 17770 hsa-mir-92a-2 | H2AFZ     | 0.444941236 mirna_pc |
| 17771 hsa-mir-92a-2 | PRR7      | 0.35120855 mirna_pc  |
| 17772 hsa-mir-92a-2 | DDX12     | 0.364578606 mirna_pc |
| 17773 hsa-mir-92a-2 | DSCC1     | 0.367904865 mirna_pc |
| 17774 hsa-mir-92a-2 | C13orf34  | 0.49827038 mirna_pc  |
| 17775 hsa-mir-92a-2 | SMC2      | 0.302230264 mirna_pc |
| 17776 hsa-mir-92a-2 | CLN6      | 0.353528091 mirna_pc |
| 17777 hsa-mir-92a-2 | MCM8      | 0.474040678 mirna_pc |
| 17778 hsa-mir-92a-2 | CPSF3     | 0.409080075 mirna_pc |
| 17779 hsa-mir-92a-2 | SNRPE     | 0.45670747 mirna_pc  |
| 17780 hsa-mir-92a-2 | C21orf45  | 0.349744145 mirna_pc |
| 17781 hsa-mir-92a-2 | ATIC      | 0.421125195 mirna_pc |
| 17782 hsa-mir-92a-2 | PPM1G     | 0.373804315 mirna_pc |
| 17783 hsa-mir-92a-2 | NPM3      | 0.397583907 mirna_pc |
| 17784 hsa-mir-92a-2 | TFAP4     | 0.47354942 mirna_pc  |
| 17785 hsa-mir-92a-2 | PUS7      | 0.314334114 mirna_pc |
| 17786 hsa-mir-92a-2 | NUTF2     | 0.303963086 mirna_pc |
| 17787 hsa-mir-92a-2 | RNPS1     | 0.307448304 mirna_pc |
| 17788 hsa-mir-92a-2 | DAZAP1    | 0.402898438 mirna_pc |
| 17789 hsa-mir-92a-2 | CBX8      | 0.442621087 mirna_pc |
| 17790 hsa-mir-92a-2 | TRMT6     | 0.320978179 mirna_pc |
| 17791 hsa-mir-92a-2 | GNPDA1    | 0.342387306 mirna_pc |
| 17792 hsa-mir-92a-2 | WDR34     | 0.304426353 mirna_pc |
| 17793 hsa-mir-92a-2 | TMEM201   | 0.320602019 mirna_pc |
| 17794 hsa-mir-92a-2 | NCL       | 0.455007637 mirna_pc |
| 17795 hsa-mir-92a-2 | PAFAH1B3  | 0.303519745 mirna_pc |
| 17796 hsa-mir-92a-2 | SRRT      | 0.339475676 mirna_pc |
| 17797 hsa-mir-92a-2 | CACYBP    | 0.367941223 mirna_pc |
| 17798 hsa-mir-92a-2 | DCTPP1    | 0.338819812 mirna_pc |
| 17799 hsa-mir-92a-2 | PSRC1     | 0.424746914 mirna_pc |
| 17800 hsa-mir-92a-2 | ODF2      | 0.309177131 mirna_pc |
| 17801 hsa-mir-92a-2 | DBF4B     | 0.436438069 mirna_pc |
| 17802 hsa-mir-92a-2 | POU2F1    | 0.376163058 mirna_pc |
| 17803 hsa-mir-92a-2 | FBL       | 0.427832662 mirna_pc |
| 17804 hsa-mir-92a-2 | C13orf37  | 0.448404003 mirna_pc |
| 17805 hsa-mir-92a-2 | EXOSC5    | 0.30708531 mirna_pc  |
| 17806 hsa-mir-92a-2 | HNRNPM    | 0.368076633 mirna_pc |
| 17807 hsa-mir-92a-2 | LSM 12.00 | 0.346068738 mirna_pc |
| 17808 hsa-mir-92a-2 | PNPT1     | 0.440664099 mirna_pc |
| 17809 hsa-mir-92a-2 | TMPO      | 0.401023775 mirna_pc |
| 17810 hsa-mir-92a-2 | SET       | 0.417105085 mirna_pc |
| 17811 hsa-mir-92a-2 | NIP7      | 0.30711522 mirna_pc  |
| 17812 hsa-mir-92a-2 | C20orf72  | 0.304083152 mirna_pc |
| 17813 hsa-mir-92a-2 | C3orf26   | 0.406684553 mirna_pc |
| 17814 hsa-mir-92a-2 | MRT04     | 0.31568813 mirna_pc  |
| 17815 hsa-mir-92a-2 | SMPD4     | 0.417798177 mirna_pc |
| 17816 hsa-mir-92a-2 | LSG1      | 0.335964187 mirna_pc |
| 17817 hsa-mir-92a-2 | PSMD3     | 0.335739358 mirna_pc |
| 17818 hsa-mir-92a-2 | GABPB1    | 0.349976071 mirna_pc |
| 17819 hsa-mir-92a-2 | PPIH      | 0.314406589 mirna_pc |

|       |               |              |             |          |
|-------|---------------|--------------|-------------|----------|
| 17820 | hsa-mir-92a-2 | PPAT         | 0.385408892 | mirna_pc |
| 17821 | hsa-mir-92a-2 | DHX9         | 0.47291932  | mirna_pc |
| 17822 | hsa-mir-92a-2 | CCDC138      | 0.389951691 | mirna_pc |
| 17823 | hsa-mir-92a-2 | LOC100128191 | 0.327202625 | mirna_pc |
| 17824 | hsa-mir-92a-2 | MRPL3        | 0.328485286 | mirna_pc |
| 17825 | hsa-mir-92a-2 | HMG2         | 0.345378778 | mirna_pc |
| 17826 | hsa-mir-92a-2 | ETV4         | 0.382940653 | mirna_pc |
| 17827 | hsa-mir-92a-2 | SMYD5        | 0.400294794 | mirna_pc |
| 17828 | hsa-mir-92a-2 | TSSC1        | 0.338803834 | mirna_pc |
| 17829 | hsa-mir-92a-2 | POLA2        | 0.354514222 | mirna_pc |
| 17830 | hsa-mir-92a-2 | SFRS1        | 0.546058842 | mirna_pc |
| 17831 | hsa-mir-92a-2 | TEX10        | 0.362019546 | mirna_pc |
| 17832 | hsa-mir-92a-2 | WDR43        | 0.428818029 | mirna_pc |
| 17833 | hsa-mir-92a-2 | CCDC58       | 0.364791896 | mirna_pc |
| 17834 | hsa-mir-92a-2 | SKP2         | 0.429631373 | mirna_pc |
| 17835 | hsa-mir-92a-2 | TIPIN        | 0.307135076 | mirna_pc |
| 17836 | hsa-mir-92a-2 | SMARCD1      | 0.410548176 | mirna_pc |
| 17837 | hsa-mir-92a-2 | ATXN2L       | 0.324879442 | mirna_pc |
| 17838 | hsa-mir-92a-2 | C4orf46      | 0.480937288 | mirna_pc |
| 17839 | hsa-mir-92a-2 | DARS2        | 0.316709021 | mirna_pc |
| 17840 | hsa-mir-92a-2 | UTP14A       | 0.314555148 | mirna_pc |
| 17841 | hsa-mir-92a-2 | C1orf107     | 0.339920576 | mirna_pc |
| 17842 | hsa-mir-92a-2 | GPN1         | 0.350397203 | mirna_pc |
| 17843 | hsa-mir-92a-2 | RFC5         | 0.333329942 | mirna_pc |
| 17844 | hsa-mir-92a-2 | HSPD1        | 0.367827189 | mirna_pc |
| 17845 | hsa-mir-92a-2 | MAZ          | 0.378567093 | mirna_pc |
| 17846 | hsa-mir-92a-2 | SSRP1        | 0.459103055 | mirna_pc |
| 17847 | hsa-mir-92a-2 | POLR2D       | 0.513915819 | mirna_pc |
| 17848 | hsa-mir-92a-2 | FTSJ2        | 0.378807142 | mirna_pc |
| 17849 | hsa-mir-92a-2 | PA2G4        | 0.349914816 | mirna_pc |
| 17850 | hsa-mir-92a-2 | EPT1         | 0.339148524 | mirna_pc |
| 17851 | hsa-mir-92a-2 | KHDRBS1      | 0.411160113 | mirna_pc |
| 17852 | hsa-mir-92a-2 | SLC5A6       | 0.342688342 | mirna_pc |
| 17853 | hsa-mir-92a-2 | C20orf27     | 0.407485672 | mirna_pc |
| 17854 | hsa-mir-92a-2 | TOMM34       | 0.354718999 | mirna_pc |
| 17855 | hsa-mir-92a-2 | MTL 5.00     | 0.358361073 | mirna_pc |
| 17856 | hsa-mir-92a-2 | TAF1A        | 0.306774637 | mirna_pc |
| 17857 | hsa-mir-92a-2 | RNF220       | 0.335168357 | mirna_pc |
| 17858 | hsa-mir-92a-2 | PRPF40A      | 0.406813362 | mirna_pc |
| 17859 | hsa-mir-92a-2 | PHF5A        | 0.334099817 | mirna_pc |
| 17860 | hsa-mir-92a-2 | AHCY         | 0.368475429 | mirna_pc |
| 17861 | hsa-mir-92a-2 | PARP1        | 0.401702485 | mirna_pc |
| 17862 | hsa-mir-92a-2 | CCT7         | 0.402803695 | mirna_pc |
| 17863 | hsa-mir-92a-2 | C4orf21      | 0.341137218 | mirna_pc |
| 17864 | hsa-mir-92a-2 | TMEM194A     | 0.359554629 | mirna_pc |
| 17865 | hsa-mir-92a-2 | SLC39A10     | 0.403434311 | mirna_pc |
| 17866 | hsa-mir-92a-2 | TDP1         | 0.303647136 | mirna_pc |
| 17867 | hsa-mir-92a-2 | NOLC1        | 0.316621844 | mirna_pc |
| 17868 | hsa-mir-92a-2 | ZNF695       | 0.376525507 | mirna_pc |
| 17869 | hsa-mir-92a-2 | PDSS1        | 0.346499231 | mirna_pc |
| 17870 | hsa-mir-92a-2 | HAUS6        | 0.357699188 | mirna_pc |
| 17871 | hsa-mir-92a-2 | CENPJ        | 0.49352621  | mirna_pc |
| 17872 | hsa-mir-92a-2 | LIN9         | 0.30268928  | mirna_pc |
| 17873 | hsa-mir-92a-2 | HNRNPU       | 0.437356966 | mirna_pc |

|                     |          |                      |
|---------------------|----------|----------------------|
| 17874 hsa-mir-92a-2 | NASP     | 0.388464941 mirna_pc |
| 17875 hsa-mir-92a-2 | NONO     | 0.345825261 mirna_pc |
| 17876 hsa-mir-92a-2 | CCDC86   | 0.390126111 mirna_pc |
| 17877 hsa-mir-92a-2 | ZNF280C  | 0.321407108 mirna_pc |
| 17878 hsa-mir-92a-2 | POLR1B   | 0.388819579 mirna_pc |
| 17879 hsa-mir-92a-2 | QSOX2    | 0.306453046 mirna_pc |
| 17880 hsa-mir-92a-2 | PTMA     | 0.374076302 mirna_pc |
| 17881 hsa-mir-92a-2 | USP39    | 0.32480025 mirna_pc  |
| 17882 hsa-mir-92a-2 | WDR76    | 0.301237112 mirna_pc |
| 17883 hsa-mir-92a-2 | EXOSC2   | 0.391947535 mirna_pc |
| 17884 hsa-mir-92a-2 | HMGXB4   | 0.325183705 mirna_pc |
| 17885 hsa-mir-92a-2 | SCARB1   | 0.324112252 mirna_pc |
| 17886 hsa-mir-92a-2 | C11orf84 | 0.435602714 mirna_pc |
| 17887 hsa-mir-92a-2 | SMG7     | 0.313195234 mirna_pc |
| 17888 hsa-mir-92a-2 | TBCE     | 0.378463129 mirna_pc |
| 17889 hsa-mir-92a-2 | NCBP2    | 0.342241821 mirna_pc |
| 17890 hsa-mir-92a-2 | SUV39H2  | 0.409140206 mirna_pc |
| 17891 hsa-mir-92a-2 | ZC3H8    | 0.333568168 mirna_pc |
| 17892 hsa-mir-92a-2 | R3HDM1   | 0.390172262 mirna_pc |
| 17893 hsa-mir-92a-2 | FANCL    | 0.404424441 mirna_pc |
| 17894 hsa-mir-92a-2 | RQCD1    | 0.323232806 mirna_pc |
| 17895 hsa-mir-92a-2 | HNRNPD   | 0.459196007 mirna_pc |
| 17896 hsa-mir-92a-2 | MTHFD2   | 0.439041152 mirna_pc |
| 17897 hsa-mir-92a-2 | GTF2F2   | 0.422667857 mirna_pc |
| 17898 hsa-mir-92a-2 | DDX31    | 0.334554222 mirna_pc |
| 17899 hsa-mir-92a-2 | DPH2     | 0.300407401 mirna_pc |
| 17900 hsa-mir-92a-2 | POP1     | 0.382559863 mirna_pc |
| 17901 hsa-mir-92a-2 | SFRS3    | 0.349126475 mirna_pc |
| 17902 hsa-mir-92a-2 | LSM 5.00 | 0.375161277 mirna_pc |
| 17903 hsa-mir-92a-2 | SHOX2    | 0.302391544 mirna_pc |
| 17904 hsa-mir-92a-2 | REXO4    | 0.331674717 mirna_pc |
| 17905 hsa-mir-92a-2 | H1FX     | 0.306821387 mirna_pc |
| 17906 hsa-mir-92a-2 | PN01     | 0.35936719 mirna_pc  |
| 17907 hsa-mir-92a-2 | CCT4     | 0.344034189 mirna_pc |
| 17908 hsa-mir-92a-2 | UMPS     | 0.371255964 mirna_pc |
| 17909 hsa-mir-92a-2 | CASP2    | 0.350807238 mirna_pc |
| 17910 hsa-mir-92a-2 | ELAVL1   | 0.457201841 mirna_pc |
| 17911 hsa-mir-92a-2 | ABCE1    | 0.314075548 mirna_pc |
| 17912 hsa-mir-92a-2 | MTHFD1   | 0.305177331 mirna_pc |
| 17913 hsa-mir-92a-2 | KIAA0406 | 0.301223479 mirna_pc |
| 17914 hsa-mir-92a-2 | NAE1     | 0.359977309 mirna_pc |
| 17915 hsa-mir-92a-2 | USP22    | 0.319616621 mirna_pc |
| 17916 hsa-mir-92a-2 | PSMC3IP  | 0.397914868 mirna_pc |
| 17917 hsa-mir-92a-2 | PAK1IP1  | 0.372935202 mirna_pc |
| 17918 hsa-mir-92a-2 | NUDT15   | 0.454101841 mirna_pc |
| 17919 hsa-mir-92a-2 | PES 1.00 | 0.318795624 mirna_pc |
| 17920 hsa-mir-92a-2 | E2F4     | 0.389027692 mirna_pc |
| 17921 hsa-mir-92a-2 | TWISTNB  | 0.30821125 mirna_pc  |
| 17922 hsa-mir-92a-2 | PGAM5    | 0.30222318 mirna_pc  |
| 17923 hsa-mir-92a-2 | DHFR     | 0.344852312 mirna_pc |
| 17924 hsa-mir-92a-2 | NAA25    | 0.361372584 mirna_pc |
| 17925 hsa-mir-92a-2 | ILF3     | 0.483638715 mirna_pc |
| 17926 hsa-mir-92a-2 | NT5DC2   | 0.353845652 mirna_pc |
| 17927 hsa-mir-92a-2 | EHMT2    | 0.395612784 mirna_pc |



|                     |           |                      |
|---------------------|-----------|----------------------|
| 17928 hsa-mir-92a-2 | HNRNPAB   | 0.329127664 mirna_pc |
| 17929 hsa-mir-92a-2 | UBAP2L    | 0.336238788 mirna_pc |
| 17930 hsa-mir-92a-2 | NUP205    | 0.306460167 mirna_pc |
| 17931 hsa-mir-92a-2 | DEK       | 0.36810141 mirna_pc  |
| 17932 hsa-mir-92a-2 | TBC1D4    | 0.324992815 mirna_pc |
| 17933 hsa-mir-92a-2 | SFRS9     | 0.318253331 mirna_pc |
| 17934 hsa-mir-92a-2 | TRIB3     | 0.39055099 mirna_pc  |
| 17935 hsa-mir-92a-2 | PASK      | 0.383644588 mirna_pc |
| 17936 hsa-mir-92a-2 | SAAL1     | 0.373426943 mirna_pc |
| 17937 hsa-mir-92a-2 | OLA1      | 0.318218007 mirna_pc |
| 17938 hsa-mir-92a-2 | RPGRIP1L  | 0.317536945 mirna_pc |
| 17939 hsa-mir-92a-2 | TGS1      | 0.408036009 mirna_pc |
| 17940 hsa-mir-92a-2 | HEATR2    | 0.48636982 mirna_pc  |
| 17941 hsa-mir-92a-2 | LSM 6.00  | 0.357158516 mirna_pc |
| 17942 hsa-mir-92a-2 | PRAME     | 0.396894456 mirna_pc |
| 17943 hsa-mir-92a-2 | CYB5B     | 0.32587631 mirna_pc  |
| 17944 hsa-mir-92a-2 | SNRPB2    | 0.30663625 mirna_pc  |
| 17945 hsa-mir-92a-2 | FUBP1     | 0.311346564 mirna_pc |
| 17946 hsa-mir-92a-2 | SUV39H1   | 0.368881379 mirna_pc |
| 17947 hsa-mir-92a-2 | IPO9      | 0.397267372 mirna_pc |
| 17948 hsa-mir-92a-2 | SART3     | 0.34704507 mirna_pc  |
| 17949 hsa-mir-92a-2 | HNRNPK    | 0.323980418 mirna_pc |
| 17950 hsa-mir-92a-2 | SR140     | 0.359449065 mirna_pc |
| 17951 hsa-mir-92a-2 | TRA2B     | 0.383117258 mirna_pc |
| 17952 hsa-mir-92a-2 | RSRC1     | 0.301431387 mirna_pc |
| 17953 hsa-mir-92a-2 | GAR1      | 0.461455436 mirna_pc |
| 17954 hsa-mir-92a-2 | CEP152    | 0.313248429 mirna_pc |
| 17955 hsa-mir-92a-2 | C15orf23  | 0.364612671 mirna_pc |
| 17956 hsa-mir-92a-2 | ZC3HAV1L  | 0.402599399 mirna_pc |
| 17957 hsa-mir-92a-2 | CIRH1A    | 0.334894175 mirna_pc |
| 17958 hsa-mir-92a-2 | SLM01     | 0.354830187 mirna_pc |
| 17959 hsa-mir-92a-2 | IGF2BP2   | 0.332709401 mirna_pc |
| 17960 hsa-mir-92a-2 | WHSC1     | 0.349900719 mirna_pc |
| 17961 hsa-mir-92a-2 | SAE1      | 0.337865851 mirna_pc |
| 17962 hsa-mir-92a-2 | RNF219    | 0.595683966 mirna_pc |
| 17963 hsa-mir-92a-2 | ITGB3BP   | 0.329144675 mirna_pc |
| 17964 hsa-mir-92a-2 | ENOPH1    | 0.358706187 mirna_pc |
| 17965 hsa-mir-92a-2 | C4orf43   | 0.380523999 mirna_pc |
| 17966 hsa-mir-92a-2 | DDX55     | 0.323276035 mirna_pc |
| 17967 hsa-mir-92a-2 | CEP78     | 0.370812861 mirna_pc |
| 17968 hsa-mir-92a-2 | PLEKHG4   | 0.321619423 mirna_pc |
| 17969 hsa-mir-92a-2 | SFPQ      | 0.422711313 mirna_pc |
| 17970 hsa-mir-92a-2 | CD83      | 0.325752761 mirna_pc |
| 17971 hsa-mir-92a-2 | GIT1      | 0.374095996 mirna_pc |
| 17972 hsa-mir-92a-2 | RCOR2     | 0.453345849 mirna_pc |
| 17973 hsa-mir-92a-2 | SHMT2     | 0.318456497 mirna_pc |
| 17974 hsa-mir-92a-2 | POLA1     | 0.370416925 mirna_pc |
| 17975 hsa-mir-92a-2 | HDAC2     | 0.379181838 mirna_pc |
| 17976 hsa-mir-92a-2 | GMNN      | 0.320050469 mirna_pc |
| 17977 hsa-mir-92a-2 | PA2G4P4   | 0.313976134 mirna_pc |
| 17978 hsa-mir-92a-2 | C10orf119 | 0.336352249 mirna_pc |
| 17979 hsa-mir-92a-2 | POLG2     | 0.308648123 mirna_pc |
| 17980 hsa-mir-92a-2 | C10orf2   | 0.415531469 mirna_pc |
| 17981 hsa-mir-92a-2 | POGK      | 0.350273387 mirna_pc |

|                     |           |                      |
|---------------------|-----------|----------------------|
| 17982 hsa-mir-92a-2 | GEMIN6    | 0.315355926 mirna_pc |
| 17983 hsa-mir-92a-2 | MRPL11    | 0.303223814 mirna_pc |
| 17984 hsa-mir-92a-2 | COX4NB    | 0.335996986 mirna_pc |
| 17985 hsa-mir-92a-2 | MSH6      | 0.440006392 mirna_pc |
| 17986 hsa-mir-92a-2 | XRN2      | 0.353093497 mirna_pc |
| 17987 hsa-mir-92a-2 | KPNB1     | 0.463163454 mirna_pc |
| 17988 hsa-mir-92a-2 | SMC3      | 0.335611411 mirna_pc |
| 17989 hsa-mir-92a-2 | FLVCR1    | 0.356890953 mirna_pc |
| 17990 hsa-mir-92a-2 | ACBD6     | 0.368501913 mirna_pc |
| 17991 hsa-mir-92a-2 | HNRNPA1   | 0.368560248 mirna_pc |
| 17992 hsa-mir-92a-2 | NPM1      | 0.321410991 mirna_pc |
| 17993 hsa-mir-92a-2 | ANKRD13B  | 0.316035441 mirna_pc |
| 17994 hsa-mir-92a-2 | ZBED4     | 0.401815872 mirna_pc |
| 17995 hsa-mir-92a-2 | MEX3A     | 0.520208808 mirna_pc |
| 17996 hsa-mir-92a-2 | CEP250    | 0.306931008 mirna_pc |
| 17997 hsa-mir-92a-2 | COIL      | 0.412038468 mirna_pc |
| 17998 hsa-mir-92a-2 | ERAL1     | 0.311881163 mirna_pc |
| 17999 hsa-mir-92a-2 | TAF5      | 0.437653576 mirna_pc |
| 18000 hsa-mir-92a-2 | TRIM28    | 0.436192672 mirna_pc |
| 18001 hsa-mir-92a-2 | FANCC     | 0.312122058 mirna_pc |
| 18002 hsa-mir-92a-2 | WDR5      | 0.355510796 mirna_pc |
| 18003 hsa-mir-92a-2 | APEX1     | 0.306793463 mirna_pc |
| 18004 hsa-mir-92a-2 | NANP      | 0.300464713 mirna_pc |
| 18005 hsa-mir-92a-2 | GAS5      | 0.317161929 mirna_pc |
| 18006 hsa-mir-92a-2 | SUZ12     | 0.30711224 mirna_pc  |
| 18007 hsa-mir-92a-2 | HNRNPA1L2 | 0.426756341 mirna_pc |
| 18008 hsa-mir-92a-2 | NAA15     | 0.32123976 mirna_pc  |
| 18009 hsa-mir-92a-2 | CBX1      | 0.405506093 mirna_pc |
| 18010 hsa-mir-92a-2 | HMGB1     | 0.474205042 mirna_pc |
| 18011 hsa-mir-92a-2 | ZBTB12    | 0.451740921 mirna_pc |
| 18012 hsa-mir-92a-2 | DIAPH3    | 0.383023169 mirna_pc |
| 18013 hsa-mir-92a-2 | C1orf35   | 0.309576753 mirna_pc |
| 18014 hsa-mir-92a-2 | TADA1     | 0.334352666 mirna_pc |
| 18015 hsa-mir-92a-2 | LOC642846 | 0.328328265 mirna_pc |
| 18016 hsa-mir-92a-2 | TGIF2     | 0.456786551 mirna_pc |
| 18017 hsa-mir-92a-2 | ZC3H18    | 0.34839824 mirna_pc  |
| 18018 hsa-mir-92a-2 | CHERP     | 0.395172778 mirna_pc |
| 18019 hsa-mir-92a-2 | FARSB     | 0.384456802 mirna_pc |
| 18020 hsa-mir-92a-2 | SNX5      | 0.326825831 mirna_pc |
| 18021 hsa-mir-92a-2 | THUMP2    | 0.308581088 mirna_pc |
| 18022 hsa-mir-92a-2 | CIB2      | 0.328725459 mirna_pc |
| 18023 hsa-mir-92a-2 | TARBP2    | 0.343158779 mirna_pc |
| 18024 hsa-mir-92a-2 | PHB       | 0.382333659 mirna_pc |
| 18025 hsa-mir-92a-2 | EBPL      | 0.307107131 mirna_pc |
| 18026 hsa-mir-92a-2 | NOL10     | 0.408920834 mirna_pc |
| 18027 hsa-mir-92a-2 | ANAPC1    | 0.365060709 mirna_pc |
| 18028 hsa-mir-92a-2 | POLE      | 0.446926014 mirna_pc |
| 18029 hsa-mir-92a-2 | HMBS      | 0.334272047 mirna_pc |
| 18030 hsa-mir-92a-2 | SOX9      | 0.350597335 mirna_pc |
| 18031 hsa-mir-92a-2 | TIMM50    | 0.41684135 mirna_pc  |
| 18032 hsa-mir-92a-2 | ADSL      | 0.384478115 mirna_pc |
| 18033 hsa-mir-92a-2 | VRK1      | 0.303890369 mirna_pc |
| 18034 hsa-mir-92a-2 | C13orf27  | 0.431516007 mirna_pc |
| 18035 hsa-mir-92a-2 | RBM14     | 0.415915842 mirna_pc |

|       |               |          |             |          |
|-------|---------------|----------|-------------|----------|
| 18036 | hsa-mir-92a-2 | EXOSC9   | 0.420995903 | mirna_pc |
| 18037 | hsa-mir-92a-2 | UNG      | 0.332787722 | mirna_pc |
| 18038 | hsa-mir-92a-2 | CCDC43   | 0.363094211 | mirna_pc |
| 18039 | hsa-mir-92a-2 | RBMX     | 0.472412858 | mirna_pc |
| 18040 | hsa-mir-92a-2 | SRP9     | 0.334387404 | mirna_pc |
| 18041 | hsa-mir-92a-2 | TSEN15   | 0.311472558 | mirna_pc |
| 18042 | hsa-mir-92a-2 | USP10    | 0.348193913 | mirna_pc |
| 18043 | hsa-mir-92a-2 | GPR180   | 0.33032834  | mirna_pc |
| 18044 | hsa-mir-92a-2 | DAP3     | 0.310666954 | mirna_pc |
| 18045 | hsa-mir-92a-2 | IQCB1    | 0.390671484 | mirna_pc |
| 18046 | hsa-mir-92a-2 | XRCC5    | 0.451366269 | mirna_pc |
| 18047 | hsa-mir-92a-2 | EXOSC8   | 0.442870873 | mirna_pc |
| 18048 | hsa-mir-92a-2 | CTCF     | 0.444114612 | mirna_pc |
| 18049 | hsa-mir-92a-2 | PDIA6    | 0.304035219 | mirna_pc |
| 18050 | hsa-mir-92a-2 | LBR      | 0.354969287 | mirna_pc |
| 18051 | hsa-mir-92a-2 | NOB1     | 0.336157347 | mirna_pc |
| 18052 | hsa-mir-92a-2 | NAA40    | 0.304103189 | mirna_pc |
| 18053 | hsa-mir-92a-2 | DNAJC14  | 0.31774202  | mirna_pc |
| 18054 | hsa-mir-92a-2 | FIP1L1   | 0.320000747 | mirna_pc |
| 18055 | hsa-mir-92a-2 | ZNF519   | 0.412039325 | mirna_pc |
| 18056 | hsa-mir-92a-2 | GTF3C3   | 0.322434982 | mirna_pc |
| 18057 | hsa-mir-92a-2 | CIT      | 0.305637024 | mirna_pc |
| 18058 | hsa-mir-92a-2 | ZRANB3   | 0.308005805 | mirna_pc |
| 18059 | hsa-mir-92a-2 | TRAP1    | 0.322055377 | mirna_pc |
| 18060 | hsa-mir-92a-2 | NUDT21   | 0.391732147 | mirna_pc |
| 18061 | hsa-mir-92a-2 | GTF3C2   | 0.336709186 | mirna_pc |
| 18062 | hsa-mir-92a-2 | MAGEF1   | 0.30626273  | mirna_pc |
| 18063 | hsa-mir-92a-2 | PSAT1    | 0.331545685 | mirna_pc |
| 18064 | hsa-mir-92a-2 | POLR1A   | 0.313673845 | mirna_pc |
| 18065 | hsa-mir-92a-2 | FAM136A  | 0.417342279 | mirna_pc |
| 18066 | hsa-mir-92a-2 | NKD2     | 0.301633419 | mirna_pc |
| 18067 | hsa-mir-92a-2 | SUPT3H   | 0.35193279  | mirna_pc |
| 18068 | hsa-mir-92a-2 | SOX12    | 0.338935624 | mirna_pc |
| 18069 | hsa-mir-92a-2 | SMARCB1  | 0.316732484 | mirna_pc |
| 18070 | hsa-mir-92a-2 | TMEM151B | 0.304727625 | mirna_pc |
| 18071 | hsa-mir-92a-2 | ITPRIPL1 | 0.377452033 | mirna_pc |
| 18072 | hsa-mir-92a-2 | FBX041   | 0.418076608 | mirna_pc |
| 18073 | hsa-mir-92a-2 | BZW2     | 0.360093706 | mirna_pc |
| 18074 | hsa-mir-92a-2 | LRPPRC   | 0.382131444 | mirna_pc |
| 18075 | hsa-mir-92a-2 | CSNK2A1  | 0.376106096 | mirna_pc |
| 18076 | hsa-mir-92a-2 | RPIA     | 0.414627073 | mirna_pc |
| 18077 | hsa-mir-92a-2 | NUP133   | 0.303604083 | mirna_pc |
| 18078 | hsa-mir-92a-2 | BCL7A    | 0.359383965 | mirna_pc |
| 18079 | hsa-mir-92a-2 | ABCF2    | 0.305251352 | mirna_pc |
| 18080 | hsa-mir-92a-2 | C7orf44  | 0.385880754 | mirna_pc |
| 18081 | hsa-mir-92a-2 | URB2     | 0.385991431 | mirna_pc |
| 18082 | hsa-mir-92a-2 | RP9      | 0.337195992 | mirna_pc |
| 18083 | hsa-mir-92a-2 | ZNF286A  | 0.429836796 | mirna_pc |
| 18084 | hsa-mir-92a-2 | SFXN4    | 0.335000816 | mirna_pc |
| 18085 | hsa-mir-92a-2 | WDR77    | 0.302847457 | mirna_pc |
| 18086 | hsa-mir-92a-2 | SURF6    | 0.327416697 | mirna_pc |
| 18087 | hsa-mir-92a-2 | MRPL21   | 0.303245312 | mirna_pc |
| 18088 | hsa-mir-92a-2 | TCEA1    | 0.312254603 | mirna_pc |
| 18089 | hsa-mir-92a-2 | NLE1     | 0.381071885 | mirna_pc |

|                     |          |                      |
|---------------------|----------|----------------------|
| 18090 hsa-mir-92a-2 | RBM28    | 0.386980128 mirna_pc |
| 18091 hsa-mir-92a-2 | RFX7     | 0.304705972 mirna_pc |
| 18092 hsa-mir-92a-2 | WDR85    | 0.30157392 mirna_pc  |
| 18093 hsa-mir-92a-2 | PSPH     | 0.331813463 mirna_pc |
| 18094 hsa-mir-92a-2 | ILKAP    | 0.326596177 mirna_pc |
| 18095 hsa-mir-92a-2 | FOXK1    | 0.363448422 mirna_pc |
| 18096 hsa-mir-92a-2 | DLEU1    | 0.388829041 mirna_pc |
| 18097 hsa-mir-92a-2 | C13orf23 | 0.46170124 mirna_pc  |
| 18098 hsa-mir-92a-2 | TRMT61B  | 0.31913753 mirna_pc  |
| 18099 hsa-mir-92a-2 | SEMA4F   | 0.324334312 mirna_pc |
| 18100 hsa-mir-92a-2 | RBM12    | 0.334889217 mirna_pc |
| 18101 hsa-mir-92a-2 | ZNF286B  | 0.437230303 mirna_pc |
| 18102 hsa-mir-92a-2 | PDF      | 0.385836323 mirna_pc |
| 18103 hsa-mir-92a-2 | C1orf109 | 0.300933299 mirna_pc |
| 18104 hsa-mir-92a-2 | MTA1     | 0.397623392 mirna_pc |
| 18105 hsa-mir-92a-2 | TCERG1   | 0.329079393 mirna_pc |
| 18106 hsa-mir-92a-2 | PSPC1    | 0.432728682 mirna_pc |
| 18107 hsa-mir-92a-2 | ATP6V1E2 | 0.311493511 mirna_pc |
| 18108 hsa-mir-92a-2 | CCNB1IP1 | 0.43024795 mirna_pc  |
| 18109 hsa-mir-92a-2 | MAPKAPK5 | 0.336909224 mirna_pc |
| 18110 hsa-mir-92a-2 | E2F6     | 0.450204448 mirna_pc |
| 18111 hsa-mir-92a-2 | SLC25A15 | 0.435298395 mirna_pc |
| 18112 hsa-mir-92a-2 | SFRS13A  | 0.380414182 mirna_pc |
| 18113 hsa-mir-92a-2 | SCLY     | 0.44639478 mirna_pc  |
| 18114 hsa-mir-92a-2 | STARD7   | 0.40480042 mirna_pc  |
| 18115 hsa-mir-92a-2 | GPR125   | 0.321378411 mirna_pc |
| 18116 hsa-mir-92a-2 | NUP35    | 0.322857313 mirna_pc |
| 18117 hsa-mir-92a-2 | FIZ1     | 0.327110149 mirna_pc |
| 18118 hsa-mir-92a-2 | SLC19A1  | 0.338522402 mirna_pc |
| 18119 hsa-mir-92a-2 | TGDS     | 0.351840568 mirna_pc |
| 18120 hsa-mir-92a-2 | TFAM     | 0.360174346 mirna_pc |
| 18121 hsa-mir-92a-2 | LDLRAD3  | 0.335144082 mirna_pc |
| 18122 hsa-mir-92a-2 | TTC27    | 0.336677275 mirna_pc |
| 18123 hsa-mir-92a-2 | DHRS13   | 0.384024636 mirna_pc |
| 18124 hsa-mir-92a-2 | ORC4L    | 0.40922614 mirna_pc  |
| 18125 hsa-mir-92a-2 | KIAA1704 | 0.371153168 mirna_pc |
| 18126 hsa-mir-92a-2 | MTIF2    | 0.375454404 mirna_pc |
| 18127 hsa-mir-92a-2 | HNRNPA3  | 0.385947194 mirna_pc |
| 18128 hsa-mir-92a-2 | KRTCAP3  | 0.310270734 mirna_pc |
| 18129 hsa-mir-92a-2 | MSL1     | 0.352775431 mirna_pc |
| 18130 hsa-mir-92a-2 | EWSR1    | 0.397874949 mirna_pc |
| 18131 hsa-mir-92a-2 | ZNF828   | 0.459250427 mirna_pc |
| 18132 hsa-mir-92a-2 | SMC1A    | 0.372231745 mirna_pc |
| 18133 hsa-mir-92a-2 | DHX57    | 0.370875493 mirna_pc |
| 18134 hsa-mir-92a-2 | ALX3     | 0.335347145 mirna_pc |
| 18135 hsa-mir-92a-2 | NUPL1    | 0.449912626 mirna_pc |
| 18136 hsa-mir-92a-2 | DARS     | 0.316830553 mirna_pc |
| 18137 hsa-mir-92a-2 | AAAS     | 0.302207182 mirna_pc |
| 18138 hsa-mir-92a-2 | SFT2D3   | 0.319541122 mirna_pc |
| 18139 hsa-mir-92a-2 | LIG3     | 0.317411265 mirna_pc |
| 18140 hsa-mir-92a-2 | ANKRD5   | 0.300509532 mirna_pc |
| 18141 hsa-mir-92a-2 | MRPS26   | 0.398234243 mirna_pc |
| 18142 hsa-mir-92a-2 | TUBGCP3  | 0.353922212 mirna_pc |
| 18143 hsa-mir-92a-2 | MRPL30   | 0.421989035 mirna_pc |

|                     |          |                      |
|---------------------|----------|----------------------|
| 18144 hsa-mir-92a-2 | DHODH    | 0.377538932 mirna_pc |
| 18145 hsa-mir-92a-2 | TSGA14   | 0.312718032 mirna_pc |
| 18146 hsa-mir-92a-2 | UPF3A    | 0.396739627 mirna_pc |
| 18147 hsa-mir-92a-2 | SFRS7    | 0.466604984 mirna_pc |
| 18148 hsa-mir-92a-2 | MRPL42   | 0.300598653 mirna_pc |
| 18149 hsa-mir-92a-2 | C18orf10 | 0.318626728 mirna_pc |
| 18150 hsa-mir-92a-2 | CA5BP    | 0.32314637 mirna_pc  |
| 18151 hsa-mir-92a-2 | TRMT2A   | 0.303694889 mirna_pc |
| 18152 hsa-mir-92a-2 | TRIT1    | 0.316399637 mirna_pc |
| 18153 hsa-mir-92a-2 | PFAS     | 0.347308695 mirna_pc |
| 18154 hsa-mir-92a-2 | SF3B2    | 0.344283974 mirna_pc |
| 18155 hsa-mir-92a-2 | RBM10    | 0.389425721 mirna_pc |
| 18156 hsa-mir-92a-2 | CDCA7L   | 0.390116847 mirna_pc |
| 18157 hsa-mir-92a-2 | ERCC3    | 0.325236 mirna_pc    |
| 18158 hsa-mir-92a-2 | HNRNPH1  | 0.338571717 mirna_pc |
| 18159 hsa-mir-92a-2 | HIRA     | 0.312763527 mirna_pc |
| 18160 hsa-mir-92a-2 | NUP153   | 0.307219445 mirna_pc |
| 18161 hsa-mir-92a-2 | NIPSNAP1 | 0.340267095 mirna_pc |
| 18162 hsa-mir-92a-2 | ARHGEF19 | 0.310899865 mirna_pc |
| 18163 hsa-mir-92a-2 | MRPL10   | 0.327640456 mirna_pc |
| 18164 hsa-mir-92a-2 | C17orf75 | 0.30130993 mirna_pc  |
| 18165 hsa-mir-92a-2 | WDR92    | 0.344879556 mirna_pc |
| 18166 hsa-mir-92a-2 | RCBTB1   | 0.324550743 mirna_pc |
| 18167 hsa-mir-92a-2 | CDC16    | 0.362264073 mirna_pc |
| 18168 hsa-mir-92a-2 | HCFC1    | 0.324447448 mirna_pc |
| 18169 hsa-mir-92a-2 | PTCD3    | 0.343569263 mirna_pc |
| 18170 hsa-mir-92a-2 | ZNF669   | 0.303096275 mirna_pc |
| 18171 hsa-mir-92a-2 | TOP3A    | 0.303654429 mirna_pc |
| 18172 hsa-mir-92a-2 | CASP6    | 0.356347779 mirna_pc |
| 18173 hsa-mir-92a-2 | RBM26    | 0.357282452 mirna_pc |
| 18174 hsa-mir-92a-2 | C2orf44  | 0.382857802 mirna_pc |
| 18175 hsa-mir-92a-2 | TMTC4    | 0.373902942 mirna_pc |
| 18176 hsa-mir-92a-2 | SEPHS1   | 0.422546779 mirna_pc |
| 18177 hsa-mir-92a-2 | CBX5     | 0.345864941 mirna_pc |
| 18178 hsa-mir-92a-2 | RMND1    | 0.33016888 mirna_pc  |
| 18179 hsa-mir-92a-2 | RYK      | 0.308711278 mirna_pc |
| 18180 hsa-mir-92a-2 | GEMIN5   | 0.301548591 mirna_pc |
| 18181 hsa-mir-92a-2 | AZIN1    | 0.300656054 mirna_pc |
| 18182 hsa-mir-92a-2 | RSL1D1   | 0.329736395 mirna_pc |
| 18183 hsa-mir-92a-2 | AGBL5    | 0.464655435 mirna_pc |
| 18184 hsa-mir-92a-2 | CEBPZ    | 0.327315092 mirna_pc |
| 18185 hsa-mir-92a-2 | SMARCE1  | 0.364982681 mirna_pc |
| 18186 hsa-mir-92a-2 | PHB2     | 0.321034085 mirna_pc |
| 18187 hsa-mir-92a-2 | C8orf33  | 0.403066119 mirna_pc |
| 18188 hsa-mir-92a-2 | MYL6B    | 0.402900567 mirna_pc |
| 18189 hsa-mir-92a-2 | MRP63    | 0.334502245 mirna_pc |
| 18190 hsa-mir-92a-2 | IPO5     | 0.554488392 mirna_pc |
| 18191 hsa-mir-92a-2 | ALG11    | 0.324778006 mirna_pc |
| 18192 hsa-mir-92a-2 | NRF1     | 0.356851634 mirna_pc |
| 18193 hsa-mir-92a-2 | INTS1    | 0.31455745 mirna_pc  |
| 18194 hsa-mir-92a-2 | MED28    | 0.320690601 mirna_pc |
| 18195 hsa-mir-92a-2 | BRD3     | 0.307742167 mirna_pc |
| 18196 hsa-mir-92a-2 | LYRM4    | 0.353819821 mirna_pc |
| 18197 hsa-mir-92a-2 | ZNF124   | 0.42023162 mirna_pc  |

|       |               |           |             |          |
|-------|---------------|-----------|-------------|----------|
| 18198 | hsa-mir-92a-2 | BCL11A    | 0.372325194 | mirna_pc |
| 18199 | hsa-mir-92a-2 | ZNF496    | 0.384059445 | mirna_pc |
| 18200 | hsa-mir-92a-2 | ZNF512    | 0.302385455 | mirna_pc |
| 18201 | hsa-mir-92a-2 | RNASEH2B  | 0.424016066 | mirna_pc |
| 18202 | hsa-mir-92a-2 | CHD1L     | 0.323540652 | mirna_pc |
| 18203 | hsa-mir-92a-2 | ZNF473    | 0.428203679 | mirna_pc |
| 18204 | hsa-mir-92a-2 | COPS7B    | 0.341657969 | mirna_pc |
| 18205 | hsa-mir-92a-2 | USP21     | 0.314870114 | mirna_pc |
| 18206 | hsa-mir-92a-2 | ALMS1     | 0.306888345 | mirna_pc |
| 18207 | hsa-mir-92a-2 | RFXAP     | 0.310562216 | mirna_pc |
| 18208 | hsa-mir-92a-2 | DCLRE1A   | 0.389974644 | mirna_pc |
| 18209 | hsa-mir-92a-2 | ZNF749    | 0.302411774 | mirna_pc |
| 18210 | hsa-mir-92a-2 | ZNF74     | 0.319207935 | mirna_pc |
| 18211 | hsa-mir-92a-2 | ANP32A    | 0.503983256 | mirna_pc |
| 18212 | hsa-mir-92a-2 | DIS3      | 0.305432504 | mirna_pc |
| 18213 | hsa-mir-92a-2 | E2F5      | 0.33159737  | mirna_pc |
| 18214 | hsa-mir-92a-2 | NUFIP1    | 0.556513267 | mirna_pc |
| 18215 | hsa-mir-92a-2 | ZNF195    | 0.36741074  | mirna_pc |
| 18216 | hsa-mir-92a-2 | ZMYM4     | 0.326769799 | mirna_pc |
| 18217 | hsa-mir-92a-2 | PRKAR1B   | 0.396037445 | mirna_pc |
| 18218 | hsa-mir-92a-2 | MED4      | 0.313678959 | mirna_pc |
| 18219 | hsa-mir-92a-2 | LRRCC1    | 0.322707043 | mirna_pc |
| 18220 | hsa-mir-92a-2 | PPP5C     | 0.371323014 | mirna_pc |
| 18221 | hsa-mir-92a-2 | SF1       | 0.346046832 | mirna_pc |
| 18222 | hsa-mir-92a-2 | HNRNPH3   | 0.360712025 | mirna_pc |
| 18223 | hsa-mir-92a-2 | NAP1L1    | 0.306516532 | mirna_pc |
| 18224 | hsa-mir-92a-2 | PEX5      | 0.308176045 | mirna_pc |
| 18225 | hsa-mir-92a-2 | POLR1D    | 0.333291083 | mirna_pc |
| 18226 | hsa-mir-92a-2 | RRP1B     | 0.311404152 | mirna_pc |
| 18227 | hsa-mir-92a-2 | UBTF      | 0.314099905 | mirna_pc |
| 18228 | hsa-mir-92a-2 | NSL1      | 0.37690126  | mirna_pc |
| 18229 | hsa-mir-92a-2 | GSDMB     | 0.365881973 | mirna_pc |
| 18230 | hsa-mir-92a-2 | TMEM170A  | 0.315769423 | mirna_pc |
| 18231 | hsa-mir-92a-2 | PHF16     | 0.302635433 | mirna_pc |
| 18232 | hsa-mir-92a-2 | EPDR1     | 0.303311712 | mirna_pc |
| 18233 | hsa-mir-92a-2 | KIAA1383  | 0.311151477 | mirna_pc |
| 18234 | hsa-mir-92a-2 | LOC400657 | 0.327366265 | mirna_pc |
| 18235 | hsa-mir-92a-2 | PTPLAD1   | 0.308179352 | mirna_pc |
| 18236 | hsa-mir-92a-2 | FAM48A    | 0.431273608 | mirna_pc |
| 18237 | hsa-mir-92a-2 | PMS1      | 0.348244289 | mirna_pc |
| 18238 | hsa-mir-92a-2 | DDX19A    | 0.330305042 | mirna_pc |
| 18239 | hsa-mir-92a-2 | CHCHD3    | 0.369292671 | mirna_pc |
| 18240 | hsa-mir-92a-2 | CCDC122   | 0.33418445  | mirna_pc |
| 18241 | hsa-mir-92a-2 | TFDP2     | 0.323263833 | mirna_pc |
| 18242 | hsa-mir-92a-2 | ZMYM2     | 0.359035936 | mirna_pc |
| 18243 | hsa-mir-92a-2 | CCNJ      | 0.446365584 | mirna_pc |
| 18244 | hsa-mir-92a-2 | DCAF16    | 0.392139917 | mirna_pc |
| 18245 | hsa-mir-92a-2 | SBK1      | 0.426470448 | mirna_pc |
| 18246 | hsa-mir-92a-2 | PABPC4L   | 0.301879079 | mirna_pc |
| 18247 | hsa-mir-92a-2 | RPS5      | 0.320153324 | mirna_pc |
| 18248 | hsa-mir-92a-2 | ABCC4     | 0.325370665 | mirna_pc |
| 18249 | hsa-mir-92a-2 | KBTD6     | 0.423469812 | mirna_pc |
| 18250 | hsa-mir-92a-2 | USP13     | 0.359813215 | mirna_pc |
| 18251 | hsa-mir-92a-2 | RASL10B   | 0.311284324 | mirna_pc |

|                     |            |                      |
|---------------------|------------|----------------------|
| 18252 hsa-mir-92a-2 | CLPB       | 0.301987415 mirna_pc |
| 18253 hsa-mir-92a-2 | SMARCC1    | 0.397179103 mirna_pc |
| 18254 hsa-mir-92a-2 | CTPS2      | 0.378355353 mirna_pc |
| 18255 hsa-mir-92a-2 | PACRGL     | 0.323309443 mirna_pc |
| 18256 hsa-mir-92a-2 | XPO4       | 0.414750292 mirna_pc |
| 18257 hsa-mir-92a-2 | DDX51      | 0.353590807 mirna_pc |
| 18258 hsa-mir-92a-2 | ZNF232     | 0.346720666 mirna_pc |
| 18259 hsa-mir-92a-2 | ZBTB39     | 0.426645041 mirna_pc |
| 18260 hsa-mir-92a-2 | CECR5      | 0.313665417 mirna_pc |
| 18261 hsa-mir-92a-2 | IFT88      | 0.39824679 mirna_pc  |
| 18262 hsa-mir-92a-2 | ESD        | 0.336247413 mirna_pc |
| 18263 hsa-mir-92a-2 | FANCF      | 0.373608323 mirna_pc |
| 18264 hsa-mir-92a-2 | FAM169A    | 0.305511757 mirna_pc |
| 18265 hsa-mir-92a-2 | MARS2      | 0.302470671 mirna_pc |
| 18266 hsa-mir-92a-2 | VPS54      | 0.313163778 mirna_pc |
| 18267 hsa-mir-92a-2 | ZNF551     | 0.328133985 mirna_pc |
| 18268 hsa-mir-92a-2 | MYCL1      | 0.311400393 mirna_pc |
| 18269 hsa-mir-92a-2 | UBAC2      | 0.305838041 mirna_pc |
| 18270 hsa-mir-92a-2 | CIAO1      | 0.37714908 mirna_pc  |
| 18271 hsa-mir-92a-2 | C2orf3     | 0.370937464 mirna_pc |
| 18272 hsa-mir-92a-2 | THAP4      | 0.308096751 mirna_pc |
| 18273 hsa-mir-92a-2 | POM121C    | 0.327438946 mirna_pc |
| 18274 hsa-mir-92a-2 | ZNF664     | 0.30603492 mirna_pc  |
| 18275 hsa-mir-92a-2 | RRP7B      | 0.364503594 mirna_pc |
| 18276 hsa-mir-92a-2 | STK35      | 0.3188771 mirna_pc   |
| 18277 hsa-mir-92a-2 | SCML2      | 0.396468814 mirna_pc |
| 18278 hsa-mir-92a-2 | MRPL19     | 0.398625434 mirna_pc |
| 18279 hsa-mir-92a-2 | ABCB10     | 0.302150372 mirna_pc |
| 18280 hsa-mir-92a-2 | ZCCHC3     | 0.463553063 mirna_pc |
| 18281 hsa-mir-92a-2 | RRP15      | 0.437107801 mirna_pc |
| 18282 hsa-mir-92a-2 | ETV5       | 0.423824292 mirna_pc |
| 18283 hsa-mir-92a-2 | DACT2      | 0.317906635 mirna_pc |
| 18284 hsa-mir-92a-2 | KIAA1430   | 0.326477833 mirna_pc |
| 18285 hsa-mir-92a-2 | AADAT      | 0.459962352 mirna_pc |
| 18286 hsa-mir-92a-2 | CBLL1      | 0.330106226 mirna_pc |
| 18287 hsa-mir-92a-2 | ACP1       | 0.352503328 mirna_pc |
| 18288 hsa-mir-92a-2 | C2orf43    | 0.33237271 mirna_pc  |
| 18289 hsa-mir-92a-2 | DACH1      | 0.309823205 mirna_pc |
| 18290 hsa-mir-92a-2 | ACTR3B     | 0.401461048 mirna_pc |
| 18291 hsa-mir-92a-2 | NOM1       | 0.307195521 mirna_pc |
| 18292 hsa-mir-92a-2 | GTF3A      | 0.428193319 mirna_pc |
| 18293 hsa-mir-92a-2 | ZNF48      | 0.343768411 mirna_pc |
| 18294 hsa-mir-92a-2 | AIMP1      | 0.304749176 mirna_pc |
| 18295 hsa-mir-92a-2 | TPP2       | 0.355337107 mirna_pc |
| 18296 hsa-mir-92a-2 | TXLNG      | 0.355899523 mirna_pc |
| 18297 hsa-mir-92a-2 | TRIM25     | 0.335544289 mirna_pc |
| 18298 hsa-mir-92a-2 | B4GALNT4   | 0.315417857 mirna_pc |
| 18299 hsa-mir-92a-2 | HSDL1      | 0.341962556 mirna_pc |
| 18300 hsa-mir-92a-2 | PPP1R1B    | 0.325643365 mirna_pc |
| 18301 hsa-mir-92a-2 | ZNF530     | 0.303211354 mirna_pc |
| 18302 hsa-mir-92a-2 | NCRNA00188 | 0.351577118 mirna_pc |
| 18303 hsa-mir-92a-2 | MIR17HG    | 0.46890158 mirna_pc  |
| 18304 hsa-mir-92a-2 | SMARCD2    | 0.303159831 mirna_pc |
| 18305 hsa-mir-92a-2 | MRPS23     | 0.316194777 mirna_pc |

|       |               |          |             |          |
|-------|---------------|----------|-------------|----------|
| 18306 | hsa-mir-92a-2 | SLC27A5  | 0.347534598 | mirna_pc |
| 18307 | hsa-mir-92a-2 | AARSD1   | 0.408244188 | mirna_pc |
| 18308 | hsa-mir-92a-2 | AARS     | 0.354615945 | mirna_pc |
| 18309 | hsa-mir-92a-2 | BOD1     | 0.382586332 | mirna_pc |
| 18310 | hsa-mir-92a-2 | KLHL23   | 0.353587123 | mirna_pc |
| 18311 | hsa-mir-92a-2 | SMARCA1  | 0.393457418 | mirna_pc |
| 18312 | hsa-mir-92a-2 | VPS37D   | 0.300635485 | mirna_pc |
| 18313 | hsa-mir-92a-2 | MRPS31   | 0.361715938 | mirna_pc |
| 18314 | hsa-mir-92a-2 | CENPV    | 0.358713161 | mirna_pc |
| 18315 | hsa-mir-92a-2 | SLC4A5   | 0.312103142 | mirna_pc |
| 18316 | hsa-mir-92a-2 | DNMT3A   | 0.525916747 | mirna_pc |
| 18317 | hsa-mir-92a-2 | MIPEP    | 0.336566433 | mirna_pc |
| 18318 | hsa-mir-92a-2 | MGC57346 | 0.337142005 | mirna_pc |
| 18319 | hsa-mir-92a-2 | TET1     | 0.301325584 | mirna_pc |
| 18320 | hsa-mir-92a-2 | PRTFDC1  | 0.358470225 | mirna_pc |
| 18321 | hsa-mir-92a-2 | CARS2    | 0.35377413  | mirna_pc |
| 18322 | hsa-mir-92a-2 | PATZ1    | 0.432519768 | mirna_pc |
| 18323 | hsa-mir-92a-2 | ZNF670   | 0.337625115 | mirna_pc |
| 18324 | hsa-mir-92a-2 | ZNF343   | 0.340415293 | mirna_pc |
| 18325 | hsa-mir-92a-2 | ZNF711   | 0.300202698 | mirna_pc |
| 18326 | hsa-mir-92a-2 | POM121   | 0.363895071 | mirna_pc |
| 18327 | hsa-mir-16-1  | TPX2     | 0.390152391 | mirna_pc |
| 18328 | hsa-mir-16-1  | KPNA2    | 0.374340726 | mirna_pc |
| 18329 | hsa-mir-16-1  | RCC2     | 0.401490954 | mirna_pc |
| 18330 | hsa-mir-16-1  | HOXC9    | 0.475754313 | mirna_pc |
| 18331 | hsa-mir-16-1  | KIF11    | 0.397241647 | mirna_pc |
| 18332 | hsa-mir-16-1  | ECT2     | 0.366936892 | mirna_pc |
| 18333 | hsa-mir-16-1  | FOXMI    | 0.3064214   | mirna_pc |
| 18334 | hsa-mir-16-1  | RRM2     | 0.408771037 | mirna_pc |
| 18335 | hsa-mir-16-1  | SPC24    | 0.329146133 | mirna_pc |
| 18336 | hsa-mir-16-1  | CDK1     | 0.325789285 | mirna_pc |
| 18337 | hsa-mir-16-1  | CDC25C   | 0.38062879  | mirna_pc |
| 18338 | hsa-mir-16-1  | MYBL2    | 0.329846801 | mirna_pc |
| 18339 | hsa-mir-16-1  | PLK1     | 0.412335645 | mirna_pc |
| 18340 | hsa-mir-16-1  | PCNA     | 0.393004374 | mirna_pc |
| 18341 | hsa-mir-16-1  | UBE2C    | 0.415961871 | mirna_pc |
| 18342 | hsa-mir-16-1  | NUSAP1   | 0.389399898 | mirna_pc |
| 18343 | hsa-mir-16-1  | KIFC1    | 0.388586982 | mirna_pc |
| 18344 | hsa-mir-16-1  | BUB1B    | 0.344797696 | mirna_pc |
| 18345 | hsa-mir-16-1  | HDGF     | 0.392095111 | mirna_pc |
| 18346 | hsa-mir-16-1  | KIF18B   | 0.371748498 | mirna_pc |
| 18347 | hsa-mir-16-1  | KIF2C    | 0.382657053 | mirna_pc |
| 18348 | hsa-mir-16-1  | FANCA    | 0.350749627 | mirna_pc |
| 18349 | hsa-mir-16-1  | NCAPG    | 0.363922608 | mirna_pc |
| 18350 | hsa-mir-16-1  | CDC20    | 0.353098984 | mirna_pc |
| 18351 | hsa-mir-16-1  | SGOL1    | 0.317817191 | mirna_pc |
| 18352 | hsa-mir-16-1  | CCNA2    | 0.490578011 | mirna_pc |
| 18353 | hsa-mir-16-1  | SPC25    | 0.408754018 | mirna_pc |
| 18354 | hsa-mir-16-1  | FANCI    | 0.35777371  | mirna_pc |
| 18355 | hsa-mir-16-1  | NEK2     | 0.384616846 | mirna_pc |
| 18356 | hsa-mir-16-1  | MND1     | 0.512311068 | mirna_pc |
| 18357 | hsa-mir-16-1  | KIF22    | 0.427302572 | mirna_pc |
| 18358 | hsa-mir-16-1  | DDX39    | 0.406365125 | mirna_pc |
| 18359 | hsa-mir-16-1  | NCAPH    | 0.391765488 | mirna_pc |



|                    |          |                      |
|--------------------|----------|----------------------|
| 18360 hsa-mir-16-1 | GTSE1    | 0.333327562 mirna_pc |
| 18361 hsa-mir-16-1 | RAD54L   | 0.420519085 mirna_pc |
| 18362 hsa-mir-16-1 | CENPA    | 0.497457875 mirna_pc |
| 18363 hsa-mir-16-1 | MAD2L1   | 0.545528451 mirna_pc |
| 18364 hsa-mir-16-1 | TIMELESS | 0.440424711 mirna_pc |
| 18365 hsa-mir-16-1 | LMNB1    | 0.395468916 mirna_pc |
| 18366 hsa-mir-16-1 | ASF1B    | 0.408027933 mirna_pc |
| 18367 hsa-mir-16-1 | CDCA8    | 0.378505818 mirna_pc |
| 18368 hsa-mir-16-1 | TROAP    | 0.454345705 mirna_pc |
| 18369 hsa-mir-16-1 | CCNB1    | 0.372692726 mirna_pc |
| 18370 hsa-mir-16-1 | CDCA5    | 0.312398942 mirna_pc |
| 18371 hsa-mir-16-1 | TACC3    | 0.346347082 mirna_pc |
| 18372 hsa-mir-16-1 | CDC45    | 0.373460246 mirna_pc |
| 18373 hsa-mir-16-1 | STMN1    | 0.503758111 mirna_pc |
| 18374 hsa-mir-16-1 | CENPM    | 0.447968499 mirna_pc |
| 18375 hsa-mir-16-1 | EXO1     | 0.314009577 mirna_pc |
| 18376 hsa-mir-16-1 | TK1      | 0.428419109 mirna_pc |
| 18377 hsa-mir-16-1 | UBE2T    | 0.391696343 mirna_pc |
| 18378 hsa-mir-16-1 | CKS2     | 0.342250162 mirna_pc |
| 18379 hsa-mir-16-1 | CKS1B    | 0.454080434 mirna_pc |
| 18380 hsa-mir-16-1 | TUBB     | 0.378786959 mirna_pc |
| 18381 hsa-mir-16-1 | MCM2     | 0.456062863 mirna_pc |
| 18382 hsa-mir-16-1 | KIAA0101 | 0.35018084 mirna_pc  |
| 18383 hsa-mir-16-1 | ORC1L    | 0.323623914 mirna_pc |
| 18384 hsa-mir-16-1 | SNRPB    | 0.396317594 mirna_pc |
| 18385 hsa-mir-16-1 | KNTC1    | 0.326859048 mirna_pc |
| 18386 hsa-mir-16-1 | UHRF1    | 0.360986104 mirna_pc |
| 18387 hsa-mir-16-1 | CCNF     | 0.354266482 mirna_pc |
| 18388 hsa-mir-16-1 | RACGAP1  | 0.310503508 mirna_pc |
| 18389 hsa-mir-16-1 | PTBP1    | 0.346464504 mirna_pc |
| 18390 hsa-mir-16-1 | CCNB2    | 0.467229084 mirna_pc |
| 18391 hsa-mir-16-1 | NUF2     | 0.312590458 mirna_pc |
| 18392 hsa-mir-16-1 | PLK4     | 0.4184388 mirna_pc   |
| 18393 hsa-mir-16-1 | KIF18A   | 0.341686839 mirna_pc |
| 18394 hsa-mir-16-1 | DEPDC1   | 0.317101489 mirna_pc |
| 18395 hsa-mir-16-1 | PTTG1    | 0.368951872 mirna_pc |
| 18396 hsa-mir-16-1 | SKA3     | 0.354332253 mirna_pc |
| 18397 hsa-mir-16-1 | HJURP    | 0.363971101 mirna_pc |
| 18398 hsa-mir-16-1 | RAD51    | 0.400756247 mirna_pc |
| 18399 hsa-mir-16-1 | BLM      | 0.346678569 mirna_pc |
| 18400 hsa-mir-16-1 | NME1     | 0.332149443 mirna_pc |
| 18401 hsa-mir-16-1 | PAICS    | 0.365219595 mirna_pc |
| 18402 hsa-mir-16-1 | BIRC5    | 0.497616924 mirna_pc |
| 18403 hsa-mir-16-1 | OIP5     | 0.389802595 mirna_pc |
| 18404 hsa-mir-16-1 | DTL      | 0.421575792 mirna_pc |
| 18405 hsa-mir-16-1 | EME1     | 0.412623018 mirna_pc |
| 18406 hsa-mir-16-1 | CENPK    | 0.345448237 mirna_pc |
| 18407 hsa-mir-16-1 | AURKB    | 0.442058426 mirna_pc |
| 18408 hsa-mir-16-1 | GSG2     | 0.35268619 mirna_pc  |
| 18409 hsa-mir-16-1 | CDT1     | 0.432507037 mirna_pc |
| 18410 hsa-mir-16-1 | MCM10    | 0.328177703 mirna_pc |
| 18411 hsa-mir-16-1 | CDCA3    | 0.459459169 mirna_pc |
| 18412 hsa-mir-16-1 | C1orf112 | 0.360273124 mirna_pc |
| 18413 hsa-mir-16-1 | GINS1    | 0.311786541 mirna_pc |

|                    |          |                      |
|--------------------|----------|----------------------|
| 18414 hsa-mir-16-1 | ALG3     | 0.410123301 mirna_pc |
| 18415 hsa-mir-16-1 | FEN1     | 0.455378755 mirna_pc |
| 18416 hsa-mir-16-1 | TRAIP    | 0.395786173 mirna_pc |
| 18417 hsa-mir-16-1 | ORC6L    | 0.382572182 mirna_pc |
| 18418 hsa-mir-16-1 | C16orf59 | 0.517757154 mirna_pc |
| 18419 hsa-mir-16-1 | C17orf53 | 0.324051721 mirna_pc |
| 18420 hsa-mir-16-1 | FAM72B   | 0.322362665 mirna_pc |
| 18421 hsa-mir-16-1 | NEIL3    | 0.384875109 mirna_pc |
| 18422 hsa-mir-16-1 | MCM7     | 0.367778229 mirna_pc |
| 18423 hsa-mir-16-1 | ACTL6A   | 0.417028408 mirna_pc |
| 18424 hsa-mir-16-1 | POLD1    | 0.3285222 mirna_pc   |
| 18425 hsa-mir-16-1 | C12orf48 | 0.382275858 mirna_pc |
| 18426 hsa-mir-16-1 | HNRNPL   | 0.448515404 mirna_pc |
| 18427 hsa-mir-16-1 | SMC4     | 0.397569536 mirna_pc |
| 18428 hsa-mir-16-1 | PKMYT1   | 0.41393169 mirna_pc  |
| 18429 hsa-mir-16-1 | SF3B4    | 0.313552387 mirna_pc |
| 18430 hsa-mir-16-1 | ZWINT    | 0.426371398 mirna_pc |
| 18431 hsa-mir-16-1 | TUBA1B   | 0.422537274 mirna_pc |
| 18432 hsa-mir-16-1 | RUVBL1   | 0.373170523 mirna_pc |
| 18433 hsa-mir-16-1 | BUB3     | 0.325978062 mirna_pc |
| 18434 hsa-mir-16-1 | UBE2S    | 0.456088983 mirna_pc |
| 18435 hsa-mir-16-1 | PSMA4    | 0.301522474 mirna_pc |
| 18436 hsa-mir-16-1 | NCAPD2   | 0.307324239 mirna_pc |
| 18437 hsa-mir-16-1 | HNRNPC   | 0.400817766 mirna_pc |
| 18438 hsa-mir-16-1 | PPIA     | 0.311632588 mirna_pc |
| 18439 hsa-mir-16-1 | ILF2     | 0.418025609 mirna_pc |
| 18440 hsa-mir-16-1 | TCF3     | 0.304329532 mirna_pc |
| 18441 hsa-mir-16-1 | TFRC     | 0.324512476 mirna_pc |
| 18442 hsa-mir-16-1 | MCM5     | 0.392219181 mirna_pc |
| 18443 hsa-mir-16-1 | RAN      | 0.353759676 mirna_pc |
| 18444 hsa-mir-16-1 | TYMS     | 0.385854795 mirna_pc |
| 18445 hsa-mir-16-1 | RFWD3    | 0.348984155 mirna_pc |
| 18446 hsa-mir-16-1 | C20orf20 | 0.331726762 mirna_pc |
| 18447 hsa-mir-16-1 | MCM6     | 0.377123592 mirna_pc |
| 18448 hsa-mir-16-1 | RNASEH2A | 0.403170172 mirna_pc |
| 18449 hsa-mir-16-1 | EPR1     | 0.506258957 mirna_pc |
| 18450 hsa-mir-16-1 | PIF1     | 0.407068081 mirna_pc |
| 18451 hsa-mir-16-1 | H2AFX    | 0.480734262 mirna_pc |
| 18452 hsa-mir-16-1 | SFRS2    | 0.487743911 mirna_pc |
| 18453 hsa-mir-16-1 | UCK2     | 0.417151265 mirna_pc |
| 18454 hsa-mir-16-1 | EFTUD2   | 0.304029068 mirna_pc |
| 18455 hsa-mir-16-1 | THOC4    | 0.445625832 mirna_pc |
| 18456 hsa-mir-16-1 | NFKBIL2  | 0.356538887 mirna_pc |
| 18457 hsa-mir-16-1 | C15orf42 | 0.312892718 mirna_pc |
| 18458 hsa-mir-16-1 | CENPN    | 0.31554697 mirna_pc  |
| 18459 hsa-mir-16-1 | PRIM2    | 0.30088759 mirna_pc  |
| 18460 hsa-mir-16-1 | FAM60A   | 0.300293609 mirna_pc |
| 18461 hsa-mir-16-1 | HMGB3    | 0.317412784 mirna_pc |
| 18462 hsa-mir-16-1 | FAM64A   | 0.410356126 mirna_pc |
| 18463 hsa-mir-16-1 | RANBP1   | 0.388889972 mirna_pc |
| 18464 hsa-mir-16-1 | E2F1     | 0.471819127 mirna_pc |
| 18465 hsa-mir-16-1 | E2F2     | 0.314252071 mirna_pc |
| 18466 hsa-mir-16-1 | SNRPG    | 0.39068897 mirna_pc  |
| 18467 hsa-mir-16-1 | MCM3     | 0.341463413 mirna_pc |

|       |              |          |             |          |
|-------|--------------|----------|-------------|----------|
| 18468 | hsa-mir-16-1 | SNRPA    | 0.510207936 | mirna_pc |
| 18469 | hsa-mir-16-1 | FUS      | 0.423370891 | mirna_pc |
| 18470 | hsa-mir-16-1 | DNAJC9   | 0.360688055 | mirna_pc |
| 18471 | hsa-mir-16-1 | U2AF2    | 0.339310415 | mirna_pc |
| 18472 | hsa-mir-16-1 | RFC3     | 0.336520816 | mirna_pc |
| 18473 | hsa-mir-16-1 | CHAF1A   | 0.413152209 | mirna_pc |
| 18474 | hsa-mir-16-1 | POC1A    | 0.358885538 | mirna_pc |
| 18475 | hsa-mir-16-1 | CENPO    | 0.538103676 | mirna_pc |
| 18476 | hsa-mir-16-1 | C19orf48 | 0.41714286  | mirna_pc |
| 18477 | hsa-mir-16-1 | NUDT1    | 0.496592245 | mirna_pc |
| 18478 | hsa-mir-16-1 | HMGB2    | 0.414124705 | mirna_pc |
| 18479 | hsa-mir-16-1 | GINS2    | 0.49963142  | mirna_pc |
| 18480 | hsa-mir-16-1 | NOP56    | 0.367642307 | mirna_pc |
| 18481 | hsa-mir-16-1 | SNRPD1   | 0.347079985 | mirna_pc |
| 18482 | hsa-mir-16-1 | SNHG1    | 0.305046684 | mirna_pc |
| 18483 | hsa-mir-16-1 | DTYMK    | 0.396228013 | mirna_pc |
| 18484 | hsa-mir-16-1 | PRMT1    | 0.363982282 | mirna_pc |
| 18485 | hsa-mir-16-1 | MLF1IP   | 0.374391891 | mirna_pc |
| 18486 | hsa-mir-16-1 | C16orf75 | 0.48223364  | mirna_pc |
| 18487 | hsa-mir-16-1 | TCF19    | 0.336743447 | mirna_pc |
| 18488 | hsa-mir-16-1 | CAD      | 0.347560379 | mirna_pc |
| 18489 | hsa-mir-16-1 | ZFP64    | 0.361294599 | mirna_pc |
| 18490 | hsa-mir-16-1 | CDK2     | 0.396599102 | mirna_pc |
| 18491 | hsa-mir-16-1 | CDK4     | 0.459497674 | mirna_pc |
| 18492 | hsa-mir-16-1 | CHTF18   | 0.363896241 | mirna_pc |
| 18493 | hsa-mir-16-1 | DLEU2    | 0.373998909 | mirna_pc |
| 18494 | hsa-mir-16-1 | KAT2A    | 0.343897485 | mirna_pc |
| 18495 | hsa-mir-16-1 | CENPH    | 0.412866735 | mirna_pc |
| 18496 | hsa-mir-16-1 | RALY     | 0.343063308 | mirna_pc |
| 18497 | hsa-mir-16-1 | MSH2     | 0.302292592 | mirna_pc |
| 18498 | hsa-mir-16-1 | PRPF19   | 0.325477592 | mirna_pc |
| 18499 | hsa-mir-16-1 | SF3B3    | 0.453031232 | mirna_pc |
| 18500 | hsa-mir-16-1 | CDC7     | 0.310836866 | mirna_pc |
| 18501 | hsa-mir-16-1 | YDJC     | 0.3169221   | mirna_pc |
| 18502 | hsa-mir-16-1 | PUS1     | 0.361859554 | mirna_pc |
| 18503 | hsa-mir-16-1 | SNRPC    | 0.377859105 | mirna_pc |
| 18504 | hsa-mir-16-1 | HAUS8    | 0.310265671 | mirna_pc |
| 18505 | hsa-mir-16-1 | PSMB4    | 0.326500922 | mirna_pc |
| 18506 | hsa-mir-16-1 | RFC4     | 0.517418472 | mirna_pc |
| 18507 | hsa-mir-16-1 | FBX05    | 0.353588709 | mirna_pc |
| 18508 | hsa-mir-16-1 | FIGNL1   | 0.312995793 | mirna_pc |
| 18509 | hsa-mir-16-1 | MDK      | 0.316504134 | mirna_pc |
| 18510 | hsa-mir-16-1 | CDC25A   | 0.338060113 | mirna_pc |
| 18511 | hsa-mir-16-1 | TOPBP1   | 0.324286335 | mirna_pc |
| 18512 | hsa-mir-16-1 | H2AFZ    | 0.539895826 | mirna_pc |
| 18513 | hsa-mir-16-1 | NRM      | 0.312834703 | mirna_pc |
| 18514 | hsa-mir-16-1 | PRR7     | 0.309799689 | mirna_pc |
| 18515 | hsa-mir-16-1 | MAGOH    | 0.33900742  | mirna_pc |
| 18516 | hsa-mir-16-1 | DDX12    | 0.316599355 | mirna_pc |
| 18517 | hsa-mir-16-1 | C13orf34 | 0.300081364 | mirna_pc |
| 18518 | hsa-mir-16-1 | CLN6     | 0.314526467 | mirna_pc |
| 18519 | hsa-mir-16-1 | MCM8     | 0.385400303 | mirna_pc |
| 18520 | hsa-mir-16-1 | CPSF3    | 0.329962934 | mirna_pc |
| 18521 | hsa-mir-16-1 | BANF1    | 0.333902423 | mirna_pc |

|       |              |              |             |          |
|-------|--------------|--------------|-------------|----------|
| 18522 | hsa-mir-16-1 | SNRPE        | 0.393053393 | mirna_pc |
| 18523 | hsa-mir-16-1 | C21orf45     | 0.369527985 | mirna_pc |
| 18524 | hsa-mir-16-1 | PPM1G        | 0.449105542 | mirna_pc |
| 18525 | hsa-mir-16-1 | DNAJB11      | 0.438084599 | mirna_pc |
| 18526 | hsa-mir-16-1 | MARCKSL1     | 0.388720531 | mirna_pc |
| 18527 | hsa-mir-16-1 | SNRPD2       | 0.324960357 | mirna_pc |
| 18528 | hsa-mir-16-1 | NPM3         | 0.304849732 | mirna_pc |
| 18529 | hsa-mir-16-1 | TFAP4        | 0.450729382 | mirna_pc |
| 18530 | hsa-mir-16-1 | NUTF2        | 0.349438049 | mirna_pc |
| 18531 | hsa-mir-16-1 | RNPS1        | 0.40805919  | mirna_pc |
| 18532 | hsa-mir-16-1 | DAZAP1       | 0.394835166 | mirna_pc |
| 18533 | hsa-mir-16-1 | CBX8         | 0.402841322 | mirna_pc |
| 18534 | hsa-mir-16-1 | RPA3         | 0.307409597 | mirna_pc |
| 18535 | hsa-mir-16-1 | WDR34        | 0.324543556 | mirna_pc |
| 18536 | hsa-mir-16-1 | TMEM201      | 0.368023226 | mirna_pc |
| 18537 | hsa-mir-16-1 | MRPL9        | 0.35729896  | mirna_pc |
| 18538 | hsa-mir-16-1 | PAFAH1B3     | 0.404139469 | mirna_pc |
| 18539 | hsa-mir-16-1 | SRRT         | 0.364426957 | mirna_pc |
| 18540 | hsa-mir-16-1 | DCTPP1       | 0.467646774 | mirna_pc |
| 18541 | hsa-mir-16-1 | PSRC1        | 0.435389491 | mirna_pc |
| 18542 | hsa-mir-16-1 | DGUOK        | 0.401838801 | mirna_pc |
| 18543 | hsa-mir-16-1 | MRPL47       | 0.388568714 | mirna_pc |
| 18544 | hsa-mir-16-1 | DBF4B        | 0.327428574 | mirna_pc |
| 18545 | hsa-mir-16-1 | POU2F1       | 0.335899845 | mirna_pc |
| 18546 | hsa-mir-16-1 | FBL          | 0.367684357 | mirna_pc |
| 18547 | hsa-mir-16-1 | HIST1H1E     | 0.392975772 | mirna_pc |
| 18548 | hsa-mir-16-1 | PSMG3        | 0.310077211 | mirna_pc |
| 18549 | hsa-mir-16-1 | THOP1        | 0.324559654 | mirna_pc |
| 18550 | hsa-mir-16-1 | EXOSC5       | 0.347799303 | mirna_pc |
| 18551 | hsa-mir-16-1 | HNRNPM       | 0.416518679 | mirna_pc |
| 18552 | hsa-mir-16-1 | TMPO         | 0.335142903 | mirna_pc |
| 18553 | hsa-mir-16-1 | PRCC         | 0.395415377 | mirna_pc |
| 18554 | hsa-mir-16-1 | POLR2H       | 0.433263818 | mirna_pc |
| 18555 | hsa-mir-16-1 | VBP1         | 0.300351521 | mirna_pc |
| 18556 | hsa-mir-16-1 | C3orf26      | 0.386974309 | mirna_pc |
| 18557 | hsa-mir-16-1 | GPR19        | 0.327905104 | mirna_pc |
| 18558 | hsa-mir-16-1 | LSM 7.00     | 0.308360128 | mirna_pc |
| 18559 | hsa-mir-16-1 | LSG1         | 0.386414432 | mirna_pc |
| 18560 | hsa-mir-16-1 | GABPB1       | 0.348781125 | mirna_pc |
| 18561 | hsa-mir-16-1 | PPIH         | 0.419668319 | mirna_pc |
| 18562 | hsa-mir-16-1 | THOC6        | 0.329698783 | mirna_pc |
| 18563 | hsa-mir-16-1 | GMPS         | 0.346699589 | mirna_pc |
| 18564 | hsa-mir-16-1 | RCN1         | 0.34025083  | mirna_pc |
| 18565 | hsa-mir-16-1 | LOC100128191 | 0.430320907 | mirna_pc |
| 18566 | hsa-mir-16-1 | MRPL3        | 0.374620942 | mirna_pc |
| 18567 | hsa-mir-16-1 | HMG2         | 0.354593095 | mirna_pc |
| 18568 | hsa-mir-16-1 | ETV4         | 0.355743695 | mirna_pc |
| 18569 | hsa-mir-16-1 | SMYD5        | 0.394133516 | mirna_pc |
| 18570 | hsa-mir-16-1 | SF3A2        | 0.309883027 | mirna_pc |
| 18571 | hsa-mir-16-1 | TSSC1        | 0.354949967 | mirna_pc |
| 18572 | hsa-mir-16-1 | POLA2        | 0.332608492 | mirna_pc |
| 18573 | hsa-mir-16-1 | SNRPF        | 0.369859841 | mirna_pc |
| 18574 | hsa-mir-16-1 | SUMO2        | 0.351133604 | mirna_pc |
| 18575 | hsa-mir-16-1 | SFRS1        | 0.401856353 | mirna_pc |

|                    |           |                      |
|--------------------|-----------|----------------------|
| 18576 hsa-mir-16-1 | CCDC58    | 0.369143653 mirna_pc |
| 18577 hsa-mir-16-1 | SKP2      | 0.343923565 mirna_pc |
| 18578 hsa-mir-16-1 | UBE2I     | 0.386669501 mirna_pc |
| 18579 hsa-mir-16-1 | TIPIN     | 0.325510447 mirna_pc |
| 18580 hsa-mir-16-1 | POLD2     | 0.354948893 mirna_pc |
| 18581 hsa-mir-16-1 | SMARCD1   | 0.340600566 mirna_pc |
| 18582 hsa-mir-16-1 | ATXN2L    | 0.312531841 mirna_pc |
| 18583 hsa-mir-16-1 | HSPBP1    | 0.335490654 mirna_pc |
| 18584 hsa-mir-16-1 | C4orf46   | 0.419416984 mirna_pc |
| 18585 hsa-mir-16-1 | ECE2      | 0.406933332 mirna_pc |
| 18586 hsa-mir-16-1 | GPN1      | 0.366255367 mirna_pc |
| 18587 hsa-mir-16-1 | RFC5      | 0.353644097 mirna_pc |
| 18588 hsa-mir-16-1 | MAZ       | 0.380525831 mirna_pc |
| 18589 hsa-mir-16-1 | SSRP1     | 0.422399017 mirna_pc |
| 18590 hsa-mir-16-1 | POLR2D    | 0.40871224 mirna_pc  |
| 18591 hsa-mir-16-1 | FTSJ2     | 0.396353555 mirna_pc |
| 18592 hsa-mir-16-1 | PA2G4     | 0.348575626 mirna_pc |
| 18593 hsa-mir-16-1 | SNRPD3    | 0.357080518 mirna_pc |
| 18594 hsa-mir-16-1 | KHDRBS1   | 0.411303039 mirna_pc |
| 18595 hsa-mir-16-1 | NXT1      | 0.356957031 mirna_pc |
| 18596 hsa-mir-16-1 | SLC5A6    | 0.361936208 mirna_pc |
| 18597 hsa-mir-16-1 | C20orf27  | 0.36706445 mirna_pc  |
| 18598 hsa-mir-16-1 | LOC92659  | 0.339985494 mirna_pc |
| 18599 hsa-mir-16-1 | MTL 5.00  | 0.440120996 mirna_pc |
| 18600 hsa-mir-16-1 | AHCY      | 0.303462693 mirna_pc |
| 18601 hsa-mir-16-1 | CCT7      | 0.336499403 mirna_pc |
| 18602 hsa-mir-16-1 | C4orf21   | 0.328073691 mirna_pc |
| 18603 hsa-mir-16-1 | SNRNP40   | 0.329550386 mirna_pc |
| 18604 hsa-mir-16-1 | METTL1    | 0.346945789 mirna_pc |
| 18605 hsa-mir-16-1 | GINS3     | 0.322128772 mirna_pc |
| 18606 hsa-mir-16-1 | C6orf129  | 0.403748103 mirna_pc |
| 18607 hsa-mir-16-1 | TIMM8A    | 0.307160652 mirna_pc |
| 18608 hsa-mir-16-1 | WRAP53    | 0.351108396 mirna_pc |
| 18609 hsa-mir-16-1 | NASP      | 0.313953555 mirna_pc |
| 18610 hsa-mir-16-1 | LAGE3     | 0.307868407 mirna_pc |
| 18611 hsa-mir-16-1 | NONO      | 0.367898129 mirna_pc |
| 18612 hsa-mir-16-1 | CCDC86    | 0.416765612 mirna_pc |
| 18613 hsa-mir-16-1 | OBFC2B    | 0.403989732 mirna_pc |
| 18614 hsa-mir-16-1 | PTMA      | 0.448842283 mirna_pc |
| 18615 hsa-mir-16-1 | USP39     | 0.379409291 mirna_pc |
| 18616 hsa-mir-16-1 | LSM 4.00  | 0.360839297 mirna_pc |
| 18617 hsa-mir-16-1 | C11orf84  | 0.391980586 mirna_pc |
| 18618 hsa-mir-16-1 | HIST1H2BK | 0.316126525 mirna_pc |
| 18619 hsa-mir-16-1 | NCBP2     | 0.362276755 mirna_pc |
| 18620 hsa-mir-16-1 | SUV39H2   | 0.349057217 mirna_pc |
| 18621 hsa-mir-16-1 | LSM 2.00  | 0.401991798 mirna_pc |
| 18622 hsa-mir-16-1 | RIBC2     | 0.314559927 mirna_pc |
| 18623 hsa-mir-16-1 | HNRNPD    | 0.42523245 mirna_pc  |
| 18624 hsa-mir-16-1 | DPY30     | 0.399699518 mirna_pc |
| 18625 hsa-mir-16-1 | MTHFD2    | 0.380971226 mirna_pc |
| 18626 hsa-mir-16-1 | POC5      | 0.306061096 mirna_pc |
| 18627 hsa-mir-16-1 | SFRS3     | 0.3971023 mirna_pc   |
| 18628 hsa-mir-16-1 | SCAMP3    | 0.323737752 mirna_pc |
| 18629 hsa-mir-16-1 | C17orf49  | 0.357428261 mirna_pc |

|                    |          |                      |
|--------------------|----------|----------------------|
| 18630 hsa-mir-16-1 | H1FX     | 0.46771519 mirna_pc  |
| 18631 hsa-mir-16-1 | CCT4     | 0.361586058 mirna_pc |
| 18632 hsa-mir-16-1 | UMPS     | 0.370138164 mirna_pc |
| 18633 hsa-mir-16-1 | SPNS1    | 0.317583475 mirna_pc |
| 18634 hsa-mir-16-1 | ELAVL1   | 0.43208365 mirna_pc  |
| 18635 hsa-mir-16-1 | RPN1     | 0.330772828 mirna_pc |
| 18636 hsa-mir-16-1 | WDR18    | 0.312036411 mirna_pc |
| 18637 hsa-mir-16-1 | HSP90B1  | 0.300498569 mirna_pc |
| 18638 hsa-mir-16-1 | PSMC3IP  | 0.318952654 mirna_pc |
| 18639 hsa-mir-16-1 | TBC1D7   | 0.348443019 mirna_pc |
| 18640 hsa-mir-16-1 | E2F4     | 0.35767979 mirna_pc  |
| 18641 hsa-mir-16-1 | PSMD2    | 0.319035775 mirna_pc |
| 18642 hsa-mir-16-1 | PMAIP1   | 0.320875205 mirna_pc |
| 18643 hsa-mir-16-1 | YWHAE    | 0.338001579 mirna_pc |
| 18644 hsa-mir-16-1 | DHFR     | 0.324155392 mirna_pc |
| 18645 hsa-mir-16-1 | ILF3     | 0.341430458 mirna_pc |
| 18646 hsa-mir-16-1 | NT5DC2   | 0.317703946 mirna_pc |
| 18647 hsa-mir-16-1 | EHMT2    | 0.387909023 mirna_pc |
| 18648 hsa-mir-16-1 | HNRNPAB  | 0.320312197 mirna_pc |
| 18649 hsa-mir-16-1 | UBAP2L   | 0.317932757 mirna_pc |
| 18650 hsa-mir-16-1 | SFRS9    | 0.32853519 mirna_pc  |
| 18651 hsa-mir-16-1 | COMMD4   | 0.396793209 mirna_pc |
| 18652 hsa-mir-16-1 | FAM100B  | 0.310969109 mirna_pc |
| 18653 hsa-mir-16-1 | PPIB     | 0.304809553 mirna_pc |
| 18654 hsa-mir-16-1 | HEATR2   | 0.371882204 mirna_pc |
| 18655 hsa-mir-16-1 | LSM 6.00 | 0.48420333 mirna_pc  |
| 18656 hsa-mir-16-1 | PRAME    | 0.379226151 mirna_pc |
| 18657 hsa-mir-16-1 | AZI1     | 0.303149712 mirna_pc |
| 18658 hsa-mir-16-1 | C7orf27  | 0.308856535 mirna_pc |
| 18659 hsa-mir-16-1 | WDR74    | 0.358546285 mirna_pc |
| 18660 hsa-mir-16-1 | SUV39H1  | 0.449505889 mirna_pc |
| 18661 hsa-mir-16-1 | POLR2G   | 0.300232389 mirna_pc |
| 18662 hsa-mir-16-1 | TRA2B    | 0.493675583 mirna_pc |
| 18663 hsa-mir-16-1 | RSRC1    | 0.374710954 mirna_pc |
| 18664 hsa-mir-16-1 | GAR1     | 0.370761829 mirna_pc |
| 18665 hsa-mir-16-1 | C15orf23 | 0.349340743 mirna_pc |
| 18666 hsa-mir-16-1 | CDRT4    | 0.323875227 mirna_pc |
| 18667 hsa-mir-16-1 | C3orf21  | 0.374026391 mirna_pc |
| 18668 hsa-mir-16-1 | NOC4L    | 0.382079513 mirna_pc |
| 18669 hsa-mir-16-1 | DIABLO   | 0.352924297 mirna_pc |
| 18670 hsa-mir-16-1 | IGF2BP2  | 0.362011531 mirna_pc |
| 18671 hsa-mir-16-1 | LIMD2    | 0.303692212 mirna_pc |
| 18672 hsa-mir-16-1 | ITGB3BP  | 0.339019866 mirna_pc |
| 18673 hsa-mir-16-1 | ENOPH1   | 0.328255898 mirna_pc |
| 18674 hsa-mir-16-1 | LAS1L    | 0.326723285 mirna_pc |
| 18675 hsa-mir-16-1 | C4orf43  | 0.317395612 mirna_pc |
| 18676 hsa-mir-16-1 | TUBG1    | 0.30145782 mirna_pc  |
| 18677 hsa-mir-16-1 | C16orf80 | 0.381043562 mirna_pc |
| 18678 hsa-mir-16-1 | PLEKHG4  | 0.315311029 mirna_pc |
| 18679 hsa-mir-16-1 | SFPQ     | 0.382052656 mirna_pc |
| 18680 hsa-mir-16-1 | VPS72    | 0.339670413 mirna_pc |
| 18681 hsa-mir-16-1 | CD83     | 0.376007229 mirna_pc |
| 18682 hsa-mir-16-1 | RCOR2    | 0.331992755 mirna_pc |
| 18683 hsa-mir-16-1 | SHMT2    | 0.321029743 mirna_pc |

|                    |           |                      |
|--------------------|-----------|----------------------|
| 18684 hsa-mir-16-1 | HDAC2     | 0.325891801 mirna_pc |
| 18685 hsa-mir-16-1 | CISD2     | 0.321248749 mirna_pc |
| 18686 hsa-mir-16-1 | MRPL12    | 0.323856939 mirna_pc |
| 18687 hsa-mir-16-1 | GMNN      | 0.330492139 mirna_pc |
| 18688 hsa-mir-16-1 | EMG1      | 0.313654911 mirna_pc |
| 18689 hsa-mir-16-1 | PA2G4P4   | 0.343424345 mirna_pc |
| 18690 hsa-mir-16-1 | C10orf119 | 0.300696899 mirna_pc |
| 18691 hsa-mir-16-1 | WDR53     | 0.30320021 mirna_pc  |
| 18692 hsa-mir-16-1 | RNF7      | 0.349653693 mirna_pc |
| 18693 hsa-mir-16-1 | GEMIN6    | 0.305324889 mirna_pc |
| 18694 hsa-mir-16-1 | MRPL11    | 0.379503186 mirna_pc |
| 18695 hsa-mir-16-1 | CRIP1     | 0.312387975 mirna_pc |
| 18696 hsa-mir-16-1 | COX4NB    | 0.35029904 mirna_pc  |
| 18697 hsa-mir-16-1 | MSH6      | 0.402149253 mirna_pc |
| 18698 hsa-mir-16-1 | TAF6L     | 0.331297495 mirna_pc |
| 18699 hsa-mir-16-1 | LEF1      | 0.323740406 mirna_pc |
| 18700 hsa-mir-16-1 | ACBD6     | 0.320975386 mirna_pc |
| 18701 hsa-mir-16-1 | HNRNPA1   | 0.374320797 mirna_pc |
| 18702 hsa-mir-16-1 | NPM1      | 0.315390921 mirna_pc |
| 18703 hsa-mir-16-1 | NUDT3     | 0.314025033 mirna_pc |
| 18704 hsa-mir-16-1 | MEA1      | 0.318008947 mirna_pc |
| 18705 hsa-mir-16-1 | MEX3A     | 0.437910165 mirna_pc |
| 18706 hsa-mir-16-1 | MOGS      | 0.311673467 mirna_pc |
| 18707 hsa-mir-16-1 | COIL      | 0.307153417 mirna_pc |
| 18708 hsa-mir-16-1 | ERAL1     | 0.358225134 mirna_pc |
| 18709 hsa-mir-16-1 | C12orf47  | 0.303377633 mirna_pc |
| 18710 hsa-mir-16-1 | TAF5      | 0.443649672 mirna_pc |
| 18711 hsa-mir-16-1 | TRIM28    | 0.373768689 mirna_pc |
| 18712 hsa-mir-16-1 | TIFA      | 0.343004105 mirna_pc |
| 18713 hsa-mir-16-1 | MAD2L2    | 0.301447032 mirna_pc |
| 18714 hsa-mir-16-1 | HNRNPA1L2 | 0.408119681 mirna_pc |
| 18715 hsa-mir-16-1 | POLR3K    | 0.352762055 mirna_pc |
| 18716 hsa-mir-16-1 | CBX1      | 0.311841677 mirna_pc |
| 18717 hsa-mir-16-1 | TMEM39B   | 0.328659742 mirna_pc |
| 18718 hsa-mir-16-1 | ZBTB12    | 0.327224733 mirna_pc |
| 18719 hsa-mir-16-1 | MRPL51    | 0.327177992 mirna_pc |
| 18720 hsa-mir-16-1 | MCTP2     | 0.308507603 mirna_pc |
| 18721 hsa-mir-16-1 | TGIF2     | 0.34184882 mirna_pc  |
| 18722 hsa-mir-16-1 | ERI3      | 0.381939635 mirna_pc |
| 18723 hsa-mir-16-1 | RCN2      | 0.324023051 mirna_pc |
| 18724 hsa-mir-16-1 | CIB2      | 0.311771415 mirna_pc |
| 18725 hsa-mir-16-1 | FAM96A    | 0.303737365 mirna_pc |
| 18726 hsa-mir-16-1 | TARBP2    | 0.368488384 mirna_pc |
| 18727 hsa-mir-16-1 | TOMM22    | 0.315235745 mirna_pc |
| 18728 hsa-mir-16-1 | PHB       | 0.359114412 mirna_pc |
| 18729 hsa-mir-16-1 | C12orf52  | 0.332782222 mirna_pc |
| 18730 hsa-mir-16-1 | NOL10     | 0.329607626 mirna_pc |
| 18731 hsa-mir-16-1 | POLE      | 0.409627947 mirna_pc |
| 18732 hsa-mir-16-1 | MUTYH     | 0.308795913 mirna_pc |
| 18733 hsa-mir-16-1 | HMBS      | 0.323519776 mirna_pc |
| 18734 hsa-mir-16-1 | TIMM50    | 0.301551206 mirna_pc |
| 18735 hsa-mir-16-1 | TMEM216   | 0.362939635 mirna_pc |
| 18736 hsa-mir-16-1 | RBMX2     | 0.301984149 mirna_pc |
| 18737 hsa-mir-16-1 | RBM14     | 0.330294274 mirna_pc |

|                    |           |                      |
|--------------------|-----------|----------------------|
| 18738 hsa-mir-16-1 | EXOSC9    | 0.415547899 mirna_pc |
| 18739 hsa-mir-16-1 | MXD3      | 0.311562615 mirna_pc |
| 18740 hsa-mir-16-1 | UNG       | 0.312420761 mirna_pc |
| 18741 hsa-mir-16-1 | GRK6      | 0.342772885 mirna_pc |
| 18742 hsa-mir-16-1 | RBMX      | 0.450111033 mirna_pc |
| 18743 hsa-mir-16-1 | TSEN15    | 0.307454473 mirna_pc |
| 18744 hsa-mir-16-1 | CDK16     | 0.44303118 mirna_pc  |
| 18745 hsa-mir-16-1 | ALKBH2    | 0.377158346 mirna_pc |
| 18746 hsa-mir-16-1 | USP10     | 0.319646534 mirna_pc |
| 18747 hsa-mir-16-1 | NTHL1     | 0.366740758 mirna_pc |
| 18748 hsa-mir-16-1 | PRKCSH    | 0.338258305 mirna_pc |
| 18749 hsa-mir-16-1 | MLF 2.00  | 0.306784149 mirna_pc |
| 18750 hsa-mir-16-1 | CTCF      | 0.431118995 mirna_pc |
| 18751 hsa-mir-16-1 | C11orf48  | 0.310884989 mirna_pc |
| 18752 hsa-mir-16-1 | RPL39L    | 0.447703573 mirna_pc |
| 18753 hsa-mir-16-1 | KATNB1    | 0.309945751 mirna_pc |
| 18754 hsa-mir-16-1 | ACD       | 0.398048021 mirna_pc |
| 18755 hsa-mir-16-1 | LOC152217 | 0.452503031 mirna_pc |
| 18756 hsa-mir-16-1 | MRPL37    | 0.309064924 mirna_pc |
| 18757 hsa-mir-16-1 | CCDC23    | 0.338698903 mirna_pc |
| 18758 hsa-mir-16-1 | IGSF9     | 0.346100612 mirna_pc |
| 18759 hsa-mir-16-1 | NOB1      | 0.336390206 mirna_pc |
| 18760 hsa-mir-16-1 | DNAJC14   | 0.345256547 mirna_pc |
| 18761 hsa-mir-16-1 | FIP1L1    | 0.343008563 mirna_pc |
| 18762 hsa-mir-16-1 | KDM2B     | 0.300796353 mirna_pc |
| 18763 hsa-mir-16-1 | TRAP1     | 0.354706878 mirna_pc |
| 18764 hsa-mir-16-1 | GTF3C2    | 0.314143942 mirna_pc |
| 18765 hsa-mir-16-1 | MAGEF1    | 0.423912584 mirna_pc |
| 18766 hsa-mir-16-1 | ICT1      | 0.330298727 mirna_pc |
| 18767 hsa-mir-16-1 | OSTC      | 0.335302368 mirna_pc |
| 18768 hsa-mir-16-1 | FAM136A   | 0.354681248 mirna_pc |
| 18769 hsa-mir-16-1 | ZNF511    | 0.327797501 mirna_pc |
| 18770 hsa-mir-16-1 | SUPT3H    | 0.30820984 mirna_pc  |
| 18771 hsa-mir-16-1 | SOX12     | 0.340691341 mirna_pc |
| 18772 hsa-mir-16-1 | SMARCB1   | 0.333259122 mirna_pc |
| 18773 hsa-mir-16-1 | B3GAT3    | 0.362413582 mirna_pc |
| 18774 hsa-mir-16-1 | SMN2      | 0.302076542 mirna_pc |
| 18775 hsa-mir-16-1 | ZNF639    | 0.391309691 mirna_pc |
| 18776 hsa-mir-16-1 | TIMM10    | 0.326259599 mirna_pc |
| 18777 hsa-mir-16-1 | ITPRIPL1  | 0.362374794 mirna_pc |
| 18778 hsa-mir-16-1 | HSD17B10  | 0.352056271 mirna_pc |
| 18779 hsa-mir-16-1 | ABT1      | 0.304294489 mirna_pc |
| 18780 hsa-mir-16-1 | RPS7      | 0.306775249 mirna_pc |
| 18781 hsa-mir-16-1 | CSNK2A1   | 0.331596514 mirna_pc |
| 18782 hsa-mir-16-1 | STRA13    | 0.509939618 mirna_pc |
| 18783 hsa-mir-16-1 | DVL3      | 0.303819987 mirna_pc |
| 18784 hsa-mir-16-1 | BCL7A     | 0.360394741 mirna_pc |
| 18785 hsa-mir-16-1 | TIMM16    | 0.328428441 mirna_pc |
| 18786 hsa-mir-16-1 | MTX1      | 0.316039449 mirna_pc |
| 18787 hsa-mir-16-1 | TRPA1     | 0.385884852 mirna_pc |
| 18788 hsa-mir-16-1 | SFXN4     | 0.324765192 mirna_pc |
| 18789 hsa-mir-16-1 | MRPL21    | 0.449998523 mirna_pc |
| 18790 hsa-mir-16-1 | NLE1      | 0.337037639 mirna_pc |
| 18791 hsa-mir-16-1 | TMEM180   | 0.319910023 mirna_pc |



|                    |          |                      |
|--------------------|----------|----------------------|
| 18792 hsa-mir-16-1 | CUEDC2   | 0.344705994 mirna_pc |
| 18793 hsa-mir-16-1 | PSPH     | 0.32079861 mirna_pc  |
| 18794 hsa-mir-16-1 | TMEM106C | 0.301159463 mirna_pc |
| 18795 hsa-mir-16-1 | TRMT61B  | 0.300791572 mirna_pc |
| 18796 hsa-mir-16-1 | TSFM     | 0.316069364 mirna_pc |
| 18797 hsa-mir-16-1 | GANAB    | 0.357136689 mirna_pc |
| 18798 hsa-mir-16-1 | ANAPC11  | 0.33301515 mirna_pc  |
| 18799 hsa-mir-16-1 | ZNF286B  | 0.365646951 mirna_pc |
| 18800 hsa-mir-16-1 | PDF      | 0.376823253 mirna_pc |
| 18801 hsa-mir-16-1 | EEFSEC   | 0.318390878 mirna_pc |
| 18802 hsa-mir-16-1 | CHCHD2   | 0.311140308 mirna_pc |
| 18803 hsa-mir-16-1 | PIGX     | 0.319037436 mirna_pc |
| 18804 hsa-mir-16-1 | PFN2     | 0.318430494 mirna_pc |
| 18805 hsa-mir-16-1 | COPZ1    | 0.354480866 mirna_pc |
| 18806 hsa-mir-16-1 | GPR3     | 0.326593402 mirna_pc |
| 18807 hsa-mir-16-1 | E2F6     | 0.373322492 mirna_pc |
| 18808 hsa-mir-16-1 | PRPSAP2  | 0.325523829 mirna_pc |
| 18809 hsa-mir-16-1 | B4GALT3  | 0.330613356 mirna_pc |
| 18810 hsa-mir-16-1 | CWF19L1  | 0.308079268 mirna_pc |
| 18811 hsa-mir-16-1 | EXOSC1   | 0.360310179 mirna_pc |
| 18812 hsa-mir-16-1 | SCLY     | 0.413287227 mirna_pc |
| 18813 hsa-mir-16-1 | NUP35    | 0.337821268 mirna_pc |
| 18814 hsa-mir-16-1 | CTU2     | 0.336135947 mirna_pc |
| 18815 hsa-mir-16-1 | DHRS13   | 0.404387084 mirna_pc |
| 18816 hsa-mir-16-1 | KRTCAP3  | 0.33310841 mirna_pc  |
| 18817 hsa-mir-16-1 | MRPS34   | 0.300228496 mirna_pc |
| 18818 hsa-mir-16-1 | SMC1A    | 0.30332278 mirna_pc  |
| 18819 hsa-mir-16-1 | ALX3     | 0.334754418 mirna_pc |
| 18820 hsa-mir-16-1 | AAAS     | 0.413289364 mirna_pc |
| 18821 hsa-mir-16-1 | C2orf79  | 0.394642698 mirna_pc |
| 18822 hsa-mir-16-1 | SUPT7L   | 0.318988773 mirna_pc |
| 18823 hsa-mir-16-1 | SMUG1    | 0.33644319 mirna_pc  |
| 18824 hsa-mir-16-1 | MRPS26   | 0.409990633 mirna_pc |
| 18825 hsa-mir-16-1 | MRPL30   | 0.310725554 mirna_pc |
| 18826 hsa-mir-16-1 | PELP1    | 0.313104539 mirna_pc |
| 18827 hsa-mir-16-1 | NSMCE4A  | 0.309108298 mirna_pc |
| 18828 hsa-mir-16-1 | PGP      | 0.305698838 mirna_pc |
| 18829 hsa-mir-16-1 | PYCR1    | 0.340418999 mirna_pc |
| 18830 hsa-mir-16-1 | DHODH    | 0.335682812 mirna_pc |
| 18831 hsa-mir-16-1 | SFRS7    | 0.46371371 mirna_pc  |
| 18832 hsa-mir-16-1 | C18orf10 | 0.316942636 mirna_pc |
| 18833 hsa-mir-16-1 | EMD      | 0.300674426 mirna_pc |
| 18834 hsa-mir-16-1 | CA5BP    | 0.336842488 mirna_pc |
| 18835 hsa-mir-16-1 | PCBP2    | 0.314153606 mirna_pc |
| 18836 hsa-mir-16-1 | UBE20    | 0.30936176 mirna_pc  |
| 18837 hsa-mir-16-1 | C10orf35 | 0.398696405 mirna_pc |
| 18838 hsa-mir-16-1 | LRRC45   | 0.372234031 mirna_pc |
| 18839 hsa-mir-16-1 | RBM10    | 0.456481774 mirna_pc |
| 18840 hsa-mir-16-1 | RPUSD2   | 0.322211751 mirna_pc |
| 18841 hsa-mir-16-1 | EIF2B5   | 0.320997891 mirna_pc |
| 18842 hsa-mir-16-1 | PARL     | 0.417443245 mirna_pc |
| 18843 hsa-mir-16-1 | ARHGEF19 | 0.300766753 mirna_pc |
| 18844 hsa-mir-16-1 | C17orf75 | 0.387923245 mirna_pc |
| 18845 hsa-mir-16-1 | RPL35A   | 0.385328006 mirna_pc |

|                    |           |                            |
|--------------------|-----------|----------------------------|
| 18846 hsa-mir-16-1 | CCND1     | 0.351704833 mirna_pc       |
| 18847 hsa-mir-16-1 | NFATC3    | 0.345557068 mirna_pc       |
| 18848 hsa-mir-16-1 | ZNF771    | 0.440130416 mirna_pc       |
| 18849 hsa-mir-16-1 |           | 3-Sep 0.325879165 mirna_pc |
| 18850 hsa-mir-16-1 | MRPL38    | 0.386954232 mirna_pc       |
| 18851 hsa-mir-16-1 | FN3KRP    | 0.303141542 mirna_pc       |
| 18852 hsa-mir-16-1 | TCTN2     | 0.346541741 mirna_pc       |
| 18853 hsa-mir-16-1 | POLR2C    | 0.353601135 mirna_pc       |
| 18854 hsa-mir-16-1 | PPP2R3B   | 0.31057432 mirna_pc        |
| 18855 hsa-mir-16-1 | C12orf10  | 0.358279073 mirna_pc       |
| 18856 hsa-mir-16-1 | UBE2M     | 0.355968608 mirna_pc       |
| 18857 hsa-mir-16-1 | C12orf45  | 0.325061069 mirna_pc       |
| 18858 hsa-mir-16-1 | C2orf44   | 0.392812147 mirna_pc       |
| 18859 hsa-mir-16-1 | TIMM17B   | 0.388889972 mirna_pc       |
| 18860 hsa-mir-16-1 | SEPHS1    | 0.388751706 mirna_pc       |
| 18861 hsa-mir-16-1 | C11orf10  | 0.30172119 mirna_pc        |
| 18862 hsa-mir-16-1 | ZNF259    | 0.373139474 mirna_pc       |
| 18863 hsa-mir-16-1 | MLST8     | 0.316648295 mirna_pc       |
| 18864 hsa-mir-16-1 | C16orf13  | 0.300904571 mirna_pc       |
| 18865 hsa-mir-16-1 | AGBL5     | 0.438654081 mirna_pc       |
| 18866 hsa-mir-16-1 | C17orf89  | 0.303019554 mirna_pc       |
| 18867 hsa-mir-16-1 | PHB2      | 0.356902207 mirna_pc       |
| 18868 hsa-mir-16-1 | GPS1      | 0.334932091 mirna_pc       |
| 18869 hsa-mir-16-1 | MYL6B     | 0.441182653 mirna_pc       |
| 18870 hsa-mir-16-1 | C7orf50   | 0.32086692 mirna_pc        |
| 18871 hsa-mir-16-1 | SENP5     | 0.323250697 mirna_pc       |
| 18872 hsa-mir-16-1 | VAC14     | 0.318628543 mirna_pc       |
| 18873 hsa-mir-16-1 | CD200     | 0.31023761 mirna_pc        |
| 18874 hsa-mir-16-1 | C20orf196 | 0.355858889 mirna_pc       |
| 18875 hsa-mir-16-1 | NME4      | 0.316739946 mirna_pc       |
| 18876 hsa-mir-16-1 | LYRM4     | 0.347683155 mirna_pc       |
| 18877 hsa-mir-16-1 | BCL11A    | 0.305415219 mirna_pc       |
| 18878 hsa-mir-16-1 | DDX28     | 0.320789079 mirna_pc       |
| 18879 hsa-mir-16-1 | COPS7B    | 0.334065281 mirna_pc       |
| 18880 hsa-mir-16-1 | USP21     | 0.380641476 mirna_pc       |
| 18881 hsa-mir-16-1 | DPCD      | 0.315021369 mirna_pc       |
| 18882 hsa-mir-16-1 | ANP32A    | 0.464029253 mirna_pc       |
| 18883 hsa-mir-16-1 | NUFIP1    | 0.330963659 mirna_pc       |
| 18884 hsa-mir-16-1 | ATP5G2    | 0.328255926 mirna_pc       |
| 18885 hsa-mir-16-1 | LMAN2L    | 0.32279729 mirna_pc        |
| 18886 hsa-mir-16-1 | FAM104B   | 0.313272489 mirna_pc       |
| 18887 hsa-mir-16-1 | C17orf81  | 0.38983934 mirna_pc        |
| 18888 hsa-mir-16-1 | SPCS2     | 0.321471788 mirna_pc       |
| 18889 hsa-mir-16-1 | BUD13     | 0.464188675 mirna_pc       |
| 18890 hsa-mir-16-1 | MORN2     | 0.376183108 mirna_pc       |
| 18891 hsa-mir-16-1 | NAIF1     | 0.305591806 mirna_pc       |
| 18892 hsa-mir-16-1 | TFDP2     | 0.302092151 mirna_pc       |
| 18893 hsa-mir-16-1 | SBK1      | 0.387772095 mirna_pc       |
| 18894 hsa-mir-16-1 | PABPC4L   | 0.315281386 mirna_pc       |
| 18895 hsa-mir-16-1 | PMF1      | 0.416443354 mirna_pc       |
| 18896 hsa-mir-16-1 | CD69      | 0.354855781 mirna_pc       |
| 18897 hsa-mir-16-1 | C12orf44  | 0.306013771 mirna_pc       |
| 18898 hsa-mir-16-1 | SLC25A33  | 0.335294726 mirna_pc       |
| 18899 hsa-mir-16-1 | MSI1      | 0.320664722 mirna_pc       |

|                    |          |                      |
|--------------------|----------|----------------------|
| 18900 hsa-mir-16-1 | CLPB     | 0.319787563 mirna_pc |
| 18901 hsa-mir-16-1 | RPS27A   | 0.308028352 mirna_pc |
| 18902 hsa-mir-16-1 | OST4     | 0.325110622 mirna_pc |
| 18903 hsa-mir-16-1 | DAK      | 0.32291786 mirna_pc  |
| 18904 hsa-mir-16-1 | NDUFB11  | 0.362348984 mirna_pc |
| 18905 hsa-mir-16-1 | TMEM18   | 0.315638541 mirna_pc |
| 18906 hsa-mir-16-1 | ZNF232   | 0.400955285 mirna_pc |
| 18907 hsa-mir-16-1 | SEN2     | 0.365583777 mirna_pc |
| 18908 hsa-mir-16-1 | ZBTB39   | 0.328505448 mirna_pc |
| 18909 hsa-mir-16-1 | ASPSCR1  | 0.312515505 mirna_pc |
| 18910 hsa-mir-16-1 | RBBP4    | 0.31135391 mirna_pc  |
| 18911 hsa-mir-16-1 | PTPMT1   | 0.313067309 mirna_pc |
| 18912 hsa-mir-16-1 | BDH1     | 0.316064072 mirna_pc |
| 18913 hsa-mir-16-1 | DNAJC19  | 0.379378236 mirna_pc |
| 18914 hsa-mir-16-1 | LRDD     | 0.325633658 mirna_pc |
| 18915 hsa-mir-16-1 | MCRS1    | 0.325274989 mirna_pc |
| 18916 hsa-mir-16-1 | SCML2    | 0.371707507 mirna_pc |
| 18917 hsa-mir-16-1 | NMNAT3   | 0.325601545 mirna_pc |
| 18918 hsa-mir-16-1 | ZCCHC3   | 0.388370382 mirna_pc |
| 18919 hsa-mir-16-1 | CHCHD6   | 0.347989904 mirna_pc |
| 18920 hsa-mir-16-1 | SNX17    | 0.319278172 mirna_pc |
| 18921 hsa-mir-16-1 | ETV5     | 0.449613055 mirna_pc |
| 18922 hsa-mir-16-1 | COX7A2L  | 0.347560579 mirna_pc |
| 18923 hsa-mir-16-1 | DACT2    | 0.433206691 mirna_pc |
| 18924 hsa-mir-16-1 | EXOSC6   | 0.347359341 mirna_pc |
| 18925 hsa-mir-16-1 | AADAT    | 0.325063899 mirna_pc |
| 18926 hsa-mir-16-1 | IGHMBP2  | 0.343986504 mirna_pc |
| 18927 hsa-mir-16-1 | ACP1     | 0.323552987 mirna_pc |
| 18928 hsa-mir-16-1 | THAP11   | 0.351365868 mirna_pc |
| 18929 hsa-mir-16-1 | TXNL4A   | 0.308002203 mirna_pc |
| 18930 hsa-mir-16-1 | SERF1A   | 0.382981749 mirna_pc |
| 18931 hsa-mir-16-1 | SNRNP25  | 0.35026447 mirna_pc  |
| 18932 hsa-mir-16-1 | PREB     | 0.47646038 mirna_pc  |
| 18933 hsa-mir-16-1 | B4GALNT4 | 0.330559815 mirna_pc |
| 18934 hsa-mir-16-1 | SSR2     | 0.33649032 mirna_pc  |
| 18935 hsa-mir-16-1 | SLC41A3  | 0.300725494 mirna_pc |
| 18936 hsa-mir-16-1 | H2AFY2   | 0.331512 mirna_pc    |
| 18937 hsa-mir-16-1 | MRPS23   | 0.302213915 mirna_pc |
| 18938 hsa-mir-16-1 | BOD1     | 0.328211697 mirna_pc |
| 18939 hsa-mir-16-1 | UXT      | 0.346295394 mirna_pc |
| 18940 hsa-mir-16-1 | RBBP7    | 0.306850415 mirna_pc |
| 18941 hsa-mir-16-1 | TEX261   | 0.324536598 mirna_pc |
| 18942 hsa-mir-16-1 | DNMT3A   | 0.420293191 mirna_pc |
| 18943 hsa-mir-16-1 | ZNF821   | 0.322012609 mirna_pc |
| 18944 hsa-mir-16-1 | C12orf73 | 0.337797721 mirna_pc |
| 18945 hsa-mir-16-1 | C15orf61 | 0.320994067 mirna_pc |
| 18946 hsa-mir-16-1 | UBE2MP1  | 0.303223765 mirna_pc |
| 18947 hsa-mir-16-1 | HAX1     | 0.346847641 mirna_pc |
| 18948 hsa-mir-3074 | TPX2     | 0.301019446 mirna_pc |
| 18949 hsa-mir-3074 | SEMA3E   | 0.436716488 mirna_pc |
| 18950 hsa-mir-3074 | NUSAP1   | 0.323311211 mirna_pc |
| 18951 hsa-mir-3074 | BUB1B    | 0.316337141 mirna_pc |
| 18952 hsa-mir-3074 | NCAPG    | 0.322449435 mirna_pc |
| 18953 hsa-mir-3074 | NEK2     | 0.335835825 mirna_pc |

|                    |              |                      |
|--------------------|--------------|----------------------|
| 18954 hsa-mir-3074 | TIMELESS     | 0.309315154 mirna_pc |
| 18955 hsa-mir-3074 | XPO1         | 0.310604223 mirna_pc |
| 18956 hsa-mir-3074 | KNTC1        | 0.348807689 mirna_pc |
| 18957 hsa-mir-3074 | YPEL1        | 0.347801709 mirna_pc |
| 18958 hsa-mir-3074 | DEPDC1       | 0.328340317 mirna_pc |
| 18959 hsa-mir-3074 | HJURP        | 0.302107634 mirna_pc |
| 18960 hsa-mir-3074 | BLM          | 0.302693289 mirna_pc |
| 18961 hsa-mir-3074 | SGOL2        | 0.304755099 mirna_pc |
| 18962 hsa-mir-3074 | CHEK2        | 0.351921163 mirna_pc |
| 18963 hsa-mir-3074 | C12orf48     | 0.363571854 mirna_pc |
| 18964 hsa-mir-3074 | WDR67        | 0.360268853 mirna_pc |
| 18965 hsa-mir-3074 | CITED2       | 0.380587331 mirna_pc |
| 18966 hsa-mir-3074 | PIF1         | 0.33369023 mirna_pc  |
| 18967 hsa-mir-3074 | E2F1         | 0.301607467 mirna_pc |
| 18968 hsa-mir-3074 | ATAD2        | 0.34025867 mirna_pc  |
| 18969 hsa-mir-3074 | ANP32E       | 0.348507324 mirna_pc |
| 18970 hsa-mir-3074 | NR2F2        | 0.37546968 mirna_pc  |
| 18971 hsa-mir-3074 | DNAJC6       | 0.34114475 mirna_pc  |
| 18972 hsa-mir-3074 | HDHD2        | 0.32476576 mirna_pc  |
| 18973 hsa-mir-3074 | MSH2         | 0.432643693 mirna_pc |
| 18974 hsa-mir-3074 | CDC7         | 0.444964319 mirna_pc |
| 18975 hsa-mir-3074 | E2F3         | 0.326415014 mirna_pc |
| 18976 hsa-mir-3074 | SMC2         | 0.388312283 mirna_pc |
| 18977 hsa-mir-3074 | MCM8         | 0.339589441 mirna_pc |
| 18978 hsa-mir-3074 | ZNF367       | 0.402626717 mirna_pc |
| 18979 hsa-mir-3074 | ODF2         | 0.34357641 mirna_pc  |
| 18980 hsa-mir-3074 | TMPO         | 0.39217162 mirna_pc  |
| 18981 hsa-mir-3074 | SET          | 0.313543836 mirna_pc |
| 18982 hsa-mir-3074 | CRY1         | 0.328889583 mirna_pc |
| 18983 hsa-mir-3074 | SLC2A11      | 0.309752807 mirna_pc |
| 18984 hsa-mir-3074 | TYW3         | 0.349132833 mirna_pc |
| 18985 hsa-mir-3074 | LOC100128191 | 0.336995303 mirna_pc |
| 18986 hsa-mir-3074 | C20orf3      | 0.329276168 mirna_pc |
| 18987 hsa-mir-3074 | TEX10        | 0.326071906 mirna_pc |
| 18988 hsa-mir-3074 | GAD1         | 0.424483325 mirna_pc |
| 18989 hsa-mir-3074 | TMEM170B     | 0.301213344 mirna_pc |
| 18990 hsa-mir-3074 | TOMM34       | 0.300833308 mirna_pc |
| 18991 hsa-mir-3074 | FIGN         | 0.43906745 mirna_pc  |
| 18992 hsa-mir-3074 | CCDC18       | 0.300810395 mirna_pc |
| 18993 hsa-mir-3074 | WDR76        | 0.306722312 mirna_pc |
| 18994 hsa-mir-3074 | SCARB1       | 0.312024614 mirna_pc |
| 18995 hsa-mir-3074 | PHF10        | 0.318681744 mirna_pc |
| 18996 hsa-mir-3074 | CAPS2        | 0.32556262 mirna_pc  |
| 18997 hsa-mir-3074 | HABP4        | 0.439494498 mirna_pc |
| 18998 hsa-mir-3074 | HSP90B1      | 0.359912529 mirna_pc |
| 18999 hsa-mir-3074 | EHMT2        | 0.343395066 mirna_pc |
| 19000 hsa-mir-3074 | KDM1B        | 0.343001303 mirna_pc |
| 19001 hsa-mir-3074 | DEK          | 0.338218213 mirna_pc |
| 19002 hsa-mir-3074 | PRAME        | 0.361752145 mirna_pc |
| 19003 hsa-mir-3074 | CEP78        | 0.302812814 mirna_pc |
| 19004 hsa-mir-3074 | TMEM120B     | 0.31884181 mirna_pc  |
| 19005 hsa-mir-3074 | HDAC2        | 0.32883817 mirna_pc  |
| 19006 hsa-mir-3074 | TDRD5        | 0.339820178 mirna_pc |
| 19007 hsa-mir-3074 | CILP2        | 0.341434813 mirna_pc |

|                    |          |                      |
|--------------------|----------|----------------------|
| 19008 hsa-mir-3074 | PA2G4P4  | 0.30847288 mirna_pc  |
| 19009 hsa-mir-3074 | ZNF217   | 0.328289731 mirna_pc |
| 19010 hsa-mir-3074 | XRN2     | 0.39946794 mirna_pc  |
| 19011 hsa-mir-3074 | MEX3A    | 0.304495763 mirna_pc |
| 19012 hsa-mir-3074 | BAT1     | 0.357653362 mirna_pc |
| 19013 hsa-mir-3074 | TAF5     | 0.315895803 mirna_pc |
| 19014 hsa-mir-3074 | FANCC    | 0.319697435 mirna_pc |
| 19015 hsa-mir-3074 | ACAN     | 0.420461104 mirna_pc |
| 19016 hsa-mir-3074 | C6orf120 | 0.300912298 mirna_pc |
| 19017 hsa-mir-3074 | SUZ12    | 0.331386218 mirna_pc |
| 19018 hsa-mir-3074 | BARD1    | 0.322645703 mirna_pc |
| 19019 hsa-mir-3074 | USP1     | 0.323460279 mirna_pc |
| 19020 hsa-mir-3074 | MTF2     | 0.338370604 mirna_pc |
| 19021 hsa-mir-3074 | METTL13  | 0.380658167 mirna_pc |
| 19022 hsa-mir-3074 | SEMA3D   | 0.456943746 mirna_pc |
| 19023 hsa-mir-3074 | POLE     | 0.328161852 mirna_pc |
| 19024 hsa-mir-3074 | CTDSPL2  | 0.301752374 mirna_pc |
| 19025 hsa-mir-3074 | C13orf27 | 0.316977266 mirna_pc |
| 19026 hsa-mir-3074 | CCDC41   | 0.319166021 mirna_pc |
| 19027 hsa-mir-3074 | OXTR     | 0.326649018 mirna_pc |
| 19028 hsa-mir-3074 | THSD7A   | 0.301617285 mirna_pc |
| 19029 hsa-mir-3074 | ZNF605   | 0.333880368 mirna_pc |
| 19030 hsa-mir-3074 | FAM136A  | 0.300802512 mirna_pc |
| 19031 hsa-mir-3074 | CABYR    | 0.303945348 mirna_pc |
| 19032 hsa-mir-3074 | C12orf76 | 0.311185265 mirna_pc |
| 19033 hsa-mir-3074 | GDPD5    | 0.386699737 mirna_pc |
| 19034 hsa-mir-3074 | C8orf51  | 0.30077628 mirna_pc  |
| 19035 hsa-mir-3074 | ARHGAP19 | 0.311725529 mirna_pc |
| 19036 hsa-mir-3074 | KIAA1731 | 0.397888863 mirna_pc |
| 19037 hsa-mir-3074 | KCNC3    | 0.307272288 mirna_pc |
| 19038 hsa-mir-3074 | CHST10   | 0.303814486 mirna_pc |
| 19039 hsa-mir-3074 | MRE11A   | 0.36642372 mirna_pc  |
| 19040 hsa-mir-3074 | ZNF84    | 0.43464758 mirna_pc  |
| 19041 hsa-mir-3074 | TAF4B    | 0.315583467 mirna_pc |
| 19042 hsa-mir-3074 | ZNF140   | 0.321148589 mirna_pc |
| 19043 hsa-mir-3074 | WASF1    | 0.309960685 mirna_pc |
| 19044 hsa-mir-3074 | SEC61A2  | 0.444998741 mirna_pc |
| 19045 hsa-mir-3074 | PSPC1    | 0.37740294 mirna_pc  |
| 19046 hsa-mir-3074 | SSX2IP   | 0.302712724 mirna_pc |
| 19047 hsa-mir-3074 | B4GALT3  | 0.356102518 mirna_pc |
| 19048 hsa-mir-3074 | NF2      | 0.33334549 mirna_pc  |
| 19049 hsa-mir-3074 | MYBL1    | 0.321055897 mirna_pc |
| 19050 hsa-mir-3074 | SLC9A5   | 0.361413914 mirna_pc |
| 19051 hsa-mir-3074 | EWSR1    | 0.34333896 mirna_pc  |
| 19052 hsa-mir-3074 | DHX57    | 0.321300304 mirna_pc |
| 19053 hsa-mir-3074 | KIAA1598 | 0.302364186 mirna_pc |
| 19054 hsa-mir-3074 | PAPOLA   | 0.356816897 mirna_pc |
| 19055 hsa-mir-3074 | TMEM38B  | 0.341826799 mirna_pc |
| 19056 hsa-mir-3074 | MRPL42   | 0.314138676 mirna_pc |
| 19057 hsa-mir-3074 | CRNKL1   | 0.332021153 mirna_pc |
| 19058 hsa-mir-3074 | TMEM136  | 0.329885088 mirna_pc |
| 19059 hsa-mir-3074 | DNM3     | 0.429155446 mirna_pc |
| 19060 hsa-mir-3074 | ZNF184   | 0.349231855 mirna_pc |
| 19061 hsa-mir-3074 | NIPSNAP1 | 0.348751139 mirna_pc |

|                    |           |                      |
|--------------------|-----------|----------------------|
| 19062 hsa-mir-3074 | C8orf37   | 0.379103311 mirna_pc |
| 19063 hsa-mir-3074 | SFI1      | 0.367020733 mirna_pc |
| 19064 hsa-mir-3074 | ZBTB10    | 0.358633984 mirna_pc |
| 19065 hsa-mir-3074 | TTC21B    | 0.34705605 mirna_pc  |
| 19066 hsa-mir-3074 | SPRY4     | 0.306151267 mirna_pc |
| 19067 hsa-mir-3074 | ANGPT1    | 0.438618591 mirna_pc |
| 19068 hsa-mir-3074 | EXTL2     | 0.334150123 mirna_pc |
| 19069 hsa-mir-3074 | TMTC4     | 0.360535145 mirna_pc |
| 19070 hsa-mir-3074 | LOC338758 | 0.386599121 mirna_pc |
| 19071 hsa-mir-3074 | PCMTD2    | 0.330814327 mirna_pc |
| 19072 hsa-mir-3074 | ANKRD36B  | 0.319000608 mirna_pc |
| 19073 hsa-mir-3074 | GPR137C   | 0.440390992 mirna_pc |
| 19074 hsa-mir-3074 | PIP5K1A   | 0.326815264 mirna_pc |
| 19075 hsa-mir-3074 | GRB14     | 0.37598471 mirna_pc  |
| 19076 hsa-mir-3074 | DCLRE1A   | 0.315848722 mirna_pc |
| 19077 hsa-mir-3074 | ANP32A    | 0.349414043 mirna_pc |
| 19078 hsa-mir-3074 | HTR7P1    | 0.334908975 mirna_pc |
| 19079 hsa-mir-3074 | E2F5      | 0.30086049 mirna_pc  |
| 19080 hsa-mir-3074 | B4GALT6   | 0.384190787 mirna_pc |
| 19081 hsa-mir-3074 | PHF16     | 0.325953868 mirna_pc |
| 19082 hsa-mir-3074 | CNIH2     | 0.337425651 mirna_pc |
| 19083 hsa-mir-3074 | BUD13     | 0.33455597 mirna_pc  |
| 19084 hsa-mir-3074 | EID3      | 0.452923616 mirna_pc |
| 19085 hsa-mir-3074 | KIAA1467  | 0.334335647 mirna_pc |
| 19086 hsa-mir-3074 | ABHD12    | 0.349065739 mirna_pc |
| 19087 hsa-mir-3074 | GATS      | 0.356611687 mirna_pc |
| 19088 hsa-mir-3074 | TRUB1     | 0.311704678 mirna_pc |
| 19089 hsa-mir-3074 | C2orf15   | 0.366834604 mirna_pc |
| 19090 hsa-mir-3074 | C12orf24  | 0.408660167 mirna_pc |
| 19091 hsa-mir-3074 | DCAF16    | 0.335936284 mirna_pc |
| 19092 hsa-mir-3074 | SBK1      | 0.364868721 mirna_pc |
| 19093 hsa-mir-3074 | SEMA3A    | 0.36986418 mirna_pc  |
| 19094 hsa-mir-3074 | USP13     | 0.433097382 mirna_pc |
| 19095 hsa-mir-3074 | ESF1      | 0.325118163 mirna_pc |
| 19096 hsa-mir-3074 | HS2ST1    | 0.404171795 mirna_pc |
| 19097 hsa-mir-3074 | GPR37     | 0.349193385 mirna_pc |
| 19098 hsa-mir-3074 | ZNF26     | 0.369301102 mirna_pc |
| 19099 hsa-mir-3074 | NR5A2     | 0.3987307 mirna_pc   |
| 19100 hsa-mir-3074 | MDM1      | 0.426937981 mirna_pc |
| 19101 hsa-mir-3074 | C10orf88  | 0.331028755 mirna_pc |
| 19102 hsa-mir-3074 | MCOLN3    | 0.332849297 mirna_pc |
| 19103 hsa-mir-3074 | PBX2      | 0.30156268 mirna_pc  |
| 19104 hsa-mir-3074 | SLITRK6   | 0.346380491 mirna_pc |
| 19105 hsa-mir-3074 | ENO3      | 0.309011731 mirna_pc |
| 19106 hsa-mir-3074 | HAPLN1    | 0.45232455 mirna_pc  |
| 19107 hsa-mir-3074 | MED17     | 0.384862981 mirna_pc |
| 19108 hsa-mir-3074 | HYOU1     | 0.345571127 mirna_pc |
| 19109 hsa-mir-3074 | RBBP4     | 0.305389704 mirna_pc |
| 19110 hsa-mir-3074 | LOC221710 | 0.431071429 mirna_pc |
| 19111 hsa-mir-3074 | CRYZ      | 0.378347183 mirna_pc |
| 19112 hsa-mir-3074 | ZNF664    | 0.383823411 mirna_pc |
| 19113 hsa-mir-3074 | SMEK2     | 0.313903207 mirna_pc |
| 19114 hsa-mir-3074 | C20orf96  | 0.479990308 mirna_pc |
| 19115 hsa-mir-3074 | SCML2     | 0.394749844 mirna_pc |

|                    |           |                      |
|--------------------|-----------|----------------------|
| 19116 hsa-mir-3074 | FAM171B   | 0.307625861 mirna_pc |
| 19117 hsa-mir-3074 | ZCCHC11   | 0.305763636 mirna_pc |
| 19118 hsa-mir-3074 | ZCCHC3    | 0.39207187 mirna_pc  |
| 19119 hsa-mir-3074 | WDR73     | 0.335254577 mirna_pc |
| 19120 hsa-mir-3074 | C2orf43   | 0.317474476 mirna_pc |
| 19121 hsa-mir-3074 | CTXN1     | 0.367721918 mirna_pc |
| 19122 hsa-mir-3074 | CEP192    | 0.30929117 mirna_pc  |
| 19123 hsa-mir-3074 | CCDC117   | 0.339405672 mirna_pc |
| 19124 hsa-mir-3074 | PRMT6     | 0.312258801 mirna_pc |
| 19125 hsa-mir-3074 | SLC11A2   | 0.358539899 mirna_pc |
| 19126 hsa-mir-3074 | BMF       | 0.314255508 mirna_pc |
| 19127 hsa-mir-3074 | BAI2      | 0.312100157 mirna_pc |
| 19128 hsa-mir-3074 | ZFP37     | 0.326509416 mirna_pc |
| 19129 hsa-mir-3074 | MPP6      | 0.303742493 mirna_pc |
| 19130 hsa-mir-3074 | LCA5      | 0.387441102 mirna_pc |
| 19131 hsa-mir-3074 | DNMT3A    | 0.351459226 mirna_pc |
| 19132 hsa-mir-3074 | WDSUB1    | 0.353705926 mirna_pc |
| 19133 hsa-mir-3074 | TET1      | 0.313855362 mirna_pc |
| 19134 hsa-mir-3074 | PATZ1     | 0.337150707 mirna_pc |
| 19135 hsa-mir-3074 | ZNF711    | 0.303064668 mirna_pc |
| 19136 hsa-mir-3074 | SS18L1    | 0.342207427 mirna_pc |
| 19137 hsa-mir-3647 | HOXC8     | 0.426021255 mirna_pc |
| 19138 hsa-mir-3647 | FANCA     | 0.302752548 mirna_pc |
| 19139 hsa-mir-3647 | XPO1      | 0.353520417 mirna_pc |
| 19140 hsa-mir-3647 | KIAA0101  | 0.346465503 mirna_pc |
| 19141 hsa-mir-3647 | KNTC1     | 0.36896664 mirna_pc  |
| 19142 hsa-mir-3647 | UHRF1     | 0.342166508 mirna_pc |
| 19143 hsa-mir-3647 | PLK4      | 0.344794812 mirna_pc |
| 19144 hsa-mir-3647 | DNMT1     | 0.332575096 mirna_pc |
| 19145 hsa-mir-3647 | CENPK     | 0.337237859 mirna_pc |
| 19146 hsa-mir-3647 | CDT1      | 0.300024261 mirna_pc |
| 19147 hsa-mir-3647 | CBFB      | 0.389231598 mirna_pc |
| 19148 hsa-mir-3647 | ORC6L     | 0.371107233 mirna_pc |
| 19149 hsa-mir-3647 | C16orf59  | 0.301617223 mirna_pc |
| 19150 hsa-mir-3647 | ACTL6A    | 0.307018974 mirna_pc |
| 19151 hsa-mir-3647 | POLD1     | 0.305237097 mirna_pc |
| 19152 hsa-mir-3647 | SMC4      | 0.409794015 mirna_pc |
| 19153 hsa-mir-3647 | HELLS     | 0.350886057 mirna_pc |
| 19154 hsa-mir-3647 | HNRNPC    | 0.305708899 mirna_pc |
| 19155 hsa-mir-3647 | RFWD3     | 0.343876333 mirna_pc |
| 19156 hsa-mir-3647 | BRIP1     | 0.307247454 mirna_pc |
| 19157 hsa-mir-3647 | C15orf42  | 0.307585786 mirna_pc |
| 19158 hsa-mir-3647 | FAM60A    | 0.334781878 mirna_pc |
| 19159 hsa-mir-3647 | CHAF1A    | 0.362336315 mirna_pc |
| 19160 hsa-mir-3647 | ULBP1     | 0.321943122 mirna_pc |
| 19161 hsa-mir-3647 | ANP32E    | 0.362145817 mirna_pc |
| 19162 hsa-mir-3647 | TRIM59    | 0.324798655 mirna_pc |
| 19163 hsa-mir-3647 | GEN1      | 0.372811303 mirna_pc |
| 19164 hsa-mir-3647 | HMGB2     | 0.385698256 mirna_pc |
| 19165 hsa-mir-3647 | E2F7      | 0.316686217 mirna_pc |
| 19166 hsa-mir-3647 | MLF1IP    | 0.328180479 mirna_pc |
| 19167 hsa-mir-3647 | HIST1H2AE | 0.376081166 mirna_pc |
| 19168 hsa-mir-3647 | CCDC99    | 0.307802283 mirna_pc |
| 19169 hsa-mir-3647 | CHTF18    | 0.306531198 mirna_pc |

|                    |          |                      |
|--------------------|----------|----------------------|
| 19170 hsa-mir-3647 | HNRNPR   | 0.313530223 mirna_pc |
| 19171 hsa-mir-3647 | DLEU2    | 0.430764319 mirna_pc |
| 19172 hsa-mir-3647 | MSH2     | 0.349847581 mirna_pc |
| 19173 hsa-mir-3647 | SF3B3    | 0.312943708 mirna_pc |
| 19174 hsa-mir-3647 | CDC7     | 0.35070123 mirna_pc  |
| 19175 hsa-mir-3647 | ARL6IP6  | 0.336768906 mirna_pc |
| 19176 hsa-mir-3647 | FBX05    | 0.350789539 mirna_pc |
| 19177 hsa-mir-3647 | DDX12    | 0.317169334 mirna_pc |
| 19178 hsa-mir-3647 | CLDN1    | 0.357520172 mirna_pc |
| 19179 hsa-mir-3647 | CPSF3    | 0.370391797 mirna_pc |
| 19180 hsa-mir-3647 | TFAP4    | 0.365912561 mirna_pc |
| 19181 hsa-mir-3647 | DAZAP1   | 0.312634851 mirna_pc |
| 19182 hsa-mir-3647 | EIF2AK2  | 0.318853313 mirna_pc |
| 19183 hsa-mir-3647 | SLC5A12  | 0.324831626 mirna_pc |
| 19184 hsa-mir-3647 | NCL      | 0.360794584 mirna_pc |
| 19185 hsa-mir-3647 | SASS6    | 0.352881535 mirna_pc |
| 19186 hsa-mir-3647 | HNRNPM   | 0.375407988 mirna_pc |
| 19187 hsa-mir-3647 | PNPT1    | 0.344457756 mirna_pc |
| 19188 hsa-mir-3647 | NIP7     | 0.342248158 mirna_pc |
| 19189 hsa-mir-3647 | C3orf26  | 0.329085698 mirna_pc |
| 19190 hsa-mir-3647 | HIST1H3D | 0.302223372 mirna_pc |
| 19191 hsa-mir-3647 | NUP93    | 0.340238882 mirna_pc |
| 19192 hsa-mir-3647 | GABPB1   | 0.362895614 mirna_pc |
| 19193 hsa-mir-3647 | WDR43    | 0.386462464 mirna_pc |
| 19194 hsa-mir-3647 | SMC6     | 0.447175503 mirna_pc |
| 19195 hsa-mir-3647 | HOXD9    | 0.328644518 mirna_pc |
| 19196 hsa-mir-3647 | SMARCD1  | 0.304547497 mirna_pc |
| 19197 hsa-mir-3647 | ATXN2L   | 0.326897353 mirna_pc |
| 19198 hsa-mir-3647 | C4orf46  | 0.307025668 mirna_pc |
| 19199 hsa-mir-3647 | GPN1     | 0.300533199 mirna_pc |
| 19200 hsa-mir-3647 | KHDRBS1  | 0.365381332 mirna_pc |
| 19201 hsa-mir-3647 | PRPF40A  | 0.335916928 mirna_pc |
| 19202 hsa-mir-3647 | CCDC18   | 0.365464612 mirna_pc |
| 19203 hsa-mir-3647 | C4orf21  | 0.334672972 mirna_pc |
| 19204 hsa-mir-3647 | SMNDC1   | 0.350153791 mirna_pc |
| 19205 hsa-mir-3647 | NEDD1    | 0.312498239 mirna_pc |
| 19206 hsa-mir-3647 | ZNF267   | 0.311317787 mirna_pc |
| 19207 hsa-mir-3647 | NASP     | 0.342142914 mirna_pc |
| 19208 hsa-mir-3647 | PTMA     | 0.370730211 mirna_pc |
| 19209 hsa-mir-3647 | SP3      | 0.31810508 mirna_pc  |
| 19210 hsa-mir-3647 | DENR     | 0.35310465 mirna_pc  |
| 19211 hsa-mir-3647 | FANCL    | 0.314312156 mirna_pc |
| 19212 hsa-mir-3647 | CCT4     | 0.302970489 mirna_pc |
| 19213 hsa-mir-3647 | ABCE1    | 0.326431312 mirna_pc |
| 19214 hsa-mir-3647 | ACTR2    | 0.33025723 mirna_pc  |
| 19215 hsa-mir-3647 | PTPN2    | 0.329074395 mirna_pc |
| 19216 hsa-mir-3647 | RPAP3    | 0.34771205 mirna_pc  |
| 19217 hsa-mir-3647 | CSAD     | 0.321036461 mirna_pc |
| 19218 hsa-mir-3647 | PMAIP1   | 0.34047195 mirna_pc  |
| 19219 hsa-mir-3647 | NAA25    | 0.318229609 mirna_pc |
| 19220 hsa-mir-3647 | C18orf54 | 0.305117326 mirna_pc |
| 19221 hsa-mir-3647 | KHSRP    | 0.313703752 mirna_pc |
| 19222 hsa-mir-3647 | LSM 6.00 | 0.308006344 mirna_pc |
| 19223 hsa-mir-3647 | SART3    | 0.338936271 mirna_pc |



|                    |           |                      |
|--------------------|-----------|----------------------|
| 19224 hsa-mir-3647 | HNRNPK    | 0.308625227 mirna_pc |
| 19225 hsa-mir-3647 | SR140     | 0.306775239 mirna_pc |
| 19226 hsa-mir-3647 | TRA2B     | 0.303431878 mirna_pc |
| 19227 hsa-mir-3647 | RSRC1     | 0.301266236 mirna_pc |
| 19228 hsa-mir-3647 | CEP152    | 0.313975875 mirna_pc |
| 19229 hsa-mir-3647 | SLMO1     | 0.344393688 mirna_pc |
| 19230 hsa-mir-3647 | TDG       | 0.307595018 mirna_pc |
| 19231 hsa-mir-3647 | C4orf43   | 0.350015901 mirna_pc |
| 19232 hsa-mir-3647 | DDX55     | 0.349023581 mirna_pc |
| 19233 hsa-mir-3647 | ODF2L     | 0.314218328 mirna_pc |
| 19234 hsa-mir-3647 | RBBP8     | 0.302635221 mirna_pc |
| 19235 hsa-mir-3647 | HDAC2     | 0.371250003 mirna_pc |
| 19236 hsa-mir-3647 | ANKRD32   | 0.356577307 mirna_pc |
| 19237 hsa-mir-3647 | CRIP1     | 0.306440794 mirna_pc |
| 19238 hsa-mir-3647 | MSH6      | 0.334271074 mirna_pc |
| 19239 hsa-mir-3647 | XRN2      | 0.329559423 mirna_pc |
| 19240 hsa-mir-3647 | TP73      | 0.322645003 mirna_pc |
| 19241 hsa-mir-3647 | OTUD6B    | 0.32045118 mirna_pc  |
| 19242 hsa-mir-3647 | SMC3      | 0.42973017 mirna_pc  |
| 19243 hsa-mir-3647 | TAF5      | 0.330287751 mirna_pc |
| 19244 hsa-mir-3647 | PPHLN1    | 0.314223781 mirna_pc |
| 19245 hsa-mir-3647 | PAPOLG    | 0.477977579 mirna_pc |
| 19246 hsa-mir-3647 | USP1      | 0.309460068 mirna_pc |
| 19247 hsa-mir-3647 | SAMD1     | 0.352260744 mirna_pc |
| 19248 hsa-mir-3647 | C16orf87  | 0.415117651 mirna_pc |
| 19249 hsa-mir-3647 | THUMP2    | 0.31267157 mirna_pc  |
| 19250 hsa-mir-3647 | MTF2      | 0.324487054 mirna_pc |
| 19251 hsa-mir-3647 | PSMD7     | 0.312846719 mirna_pc |
| 19252 hsa-mir-3647 | DDX47     | 0.318830539 mirna_pc |
| 19253 hsa-mir-3647 | CTDSPL2   | 0.301707668 mirna_pc |
| 19254 hsa-mir-3647 | TAF1B     | 0.329272749 mirna_pc |
| 19255 hsa-mir-3647 | OGFOD1    | 0.362569219 mirna_pc |
| 19256 hsa-mir-3647 | PPP3R1    | 0.455444411 mirna_pc |
| 19257 hsa-mir-3647 | EXOSC9    | 0.321301972 mirna_pc |
| 19258 hsa-mir-3647 | NETO2     | 0.393029357 mirna_pc |
| 19259 hsa-mir-3647 | LOC374443 | 0.323868387 mirna_pc |
| 19260 hsa-mir-3647 | GPN3      | 0.321106656 mirna_pc |
| 19261 hsa-mir-3647 | ASB3      | 0.309856492 mirna_pc |
| 19262 hsa-mir-3647 | ZNF200    | 0.3408254 mirna_pc   |
| 19263 hsa-mir-3647 | C5orf15   | 0.325575231 mirna_pc |
| 19264 hsa-mir-3647 | UBXN2A    | 0.381200575 mirna_pc |
| 19265 hsa-mir-3647 | COMMD2    | 0.312830882 mirna_pc |
| 19266 hsa-mir-3647 | NUDT21    | 0.417799531 mirna_pc |
| 19267 hsa-mir-3647 | SCLT1     | 0.329798271 mirna_pc |
| 19268 hsa-mir-3647 | PCGF6     | 0.376937379 mirna_pc |
| 19269 hsa-mir-3647 | S1PR5     | 0.385844217 mirna_pc |
| 19270 hsa-mir-3647 | TTC32     | 0.324466014 mirna_pc |
| 19271 hsa-mir-3647 | SMN2      | 0.404001421 mirna_pc |
| 19272 hsa-mir-3647 | ZNF639    | 0.315443723 mirna_pc |
| 19273 hsa-mir-3647 | SART1     | 0.306682027 mirna_pc |
| 19274 hsa-mir-3647 | C12orf76  | 0.373115535 mirna_pc |
| 19275 hsa-mir-3647 | MEX3B     | 0.308668703 mirna_pc |
| 19276 hsa-mir-3647 | MPHOSPH10 | 0.397481597 mirna_pc |
| 19277 hsa-mir-3647 | ANKRD11   | 0.367888108 mirna_pc |

|                    |          |                      |
|--------------------|----------|----------------------|
| 19278 hsa-mir-3647 | IL27RA   | 0.426177699 mirna_pc |
| 19279 hsa-mir-3647 | WNT10A   | 0.318211101 mirna_pc |
| 19280 hsa-mir-3647 | TCEA1    | 0.366916313 mirna_pc |
| 19281 hsa-mir-3647 | FXR1     | 0.368496472 mirna_pc |
| 19282 hsa-mir-3647 | CLEC2D   | 0.333767612 mirna_pc |
| 19283 hsa-mir-3647 | UPF3B    | 0.303375767 mirna_pc |
| 19284 hsa-mir-3647 | TAF4B    | 0.309437882 mirna_pc |
| 19285 hsa-mir-3647 | RWDD3    | 0.302208606 mirna_pc |
| 19286 hsa-mir-3647 | IFT80    | 0.304857224 mirna_pc |
| 19287 hsa-mir-3647 | DDX46    | 0.31001572 mirna_pc  |
| 19288 hsa-mir-3647 | PUS10    | 0.399925417 mirna_pc |
| 19289 hsa-mir-3647 | TCERG1   | 0.361309106 mirna_pc |
| 19290 hsa-mir-3647 | INTU     | 0.327839236 mirna_pc |
| 19291 hsa-mir-3647 | E2F6     | 0.33374903 mirna_pc  |
| 19292 hsa-mir-3647 | SFRS13A  | 0.339965838 mirna_pc |
| 19293 hsa-mir-3647 | CCDC59   | 0.354164581 mirna_pc |
| 19294 hsa-mir-3647 | SLC4A1AP | 0.443569839 mirna_pc |
| 19295 hsa-mir-3647 | TTC27    | 0.370289942 mirna_pc |
| 19296 hsa-mir-3647 | MTIF2    | 0.304914356 mirna_pc |
| 19297 hsa-mir-3647 | HNRNPA3  | 0.355301674 mirna_pc |
| 19298 hsa-mir-3647 | EWSR1    | 0.339275296 mirna_pc |
| 19299 hsa-mir-3647 | KRR1     | 0.368409775 mirna_pc |
| 19300 hsa-mir-3647 | DHX57    | 0.355891911 mirna_pc |
| 19301 hsa-mir-3647 | TNFAIP8  | 0.317192615 mirna_pc |
| 19302 hsa-mir-3647 | CCDC45   | 0.304107009 mirna_pc |
| 19303 hsa-mir-3647 | SUPT7L   | 0.32797014 mirna_pc  |
| 19304 hsa-mir-3647 | RIMKLB   | 0.301744687 mirna_pc |
| 19305 hsa-mir-3647 | SFRS7    | 0.32583094 mirna_pc  |
| 19306 hsa-mir-3647 | MRPL42   | 0.3495846 mirna_pc   |
| 19307 hsa-mir-3647 | SF3B2    | 0.367226669 mirna_pc |
| 19308 hsa-mir-3647 | KGFLP2   | 0.355529787 mirna_pc |
| 19309 hsa-mir-3647 | AEBP2    | 0.393947656 mirna_pc |
| 19310 hsa-mir-3647 | SLC35F2  | 0.305365987 mirna_pc |
| 19311 hsa-mir-3647 | IL15     | 0.331837329 mirna_pc |
| 19312 hsa-mir-3647 | DNM1L    | 0.318143523 mirna_pc |
| 19313 hsa-mir-3647 | ZCCHC8   | 0.358718003 mirna_pc |
| 19314 hsa-mir-3647 | CLEC2B   | 0.339148839 mirna_pc |
| 19315 hsa-mir-3647 | DCP2     | 0.305222738 mirna_pc |
| 19316 hsa-mir-3647 | PRKD3    | 0.352455601 mirna_pc |
| 19317 hsa-mir-3647 | SRFBP1   | 0.325795002 mirna_pc |
| 19318 hsa-mir-3647 | CEBPZ    | 0.317723276 mirna_pc |
| 19319 hsa-mir-3647 | CCDC76   | 0.304055154 mirna_pc |
| 19320 hsa-mir-3647 | MATR3    | 0.319027904 mirna_pc |
| 19321 hsa-mir-3647 | ZFP1     | 0.342625759 mirna_pc |
| 19322 hsa-mir-3647 | ARMC1    | 0.312061035 mirna_pc |
| 19323 hsa-mir-3647 | BCL11A   | 0.374673272 mirna_pc |
| 19324 hsa-mir-3647 | POLR3F   | 0.308748881 mirna_pc |
| 19325 hsa-mir-3647 | PAPD5    | 0.318254554 mirna_pc |
| 19326 hsa-mir-3647 | PEX13    | 0.407120691 mirna_pc |
| 19327 hsa-mir-3647 | DCAF17   | 0.3657913 mirna_pc   |
| 19328 hsa-mir-3647 | ETAA1    | 0.339341315 mirna_pc |
| 19329 hsa-mir-3647 | HNRNPH3  | 0.315220851 mirna_pc |
| 19330 hsa-mir-3647 | C7orf60  | 0.30266107 mirna_pc  |
| 19331 hsa-mir-3647 | NAP1L1   | 0.308020499 mirna_pc |

|                    |           |                      |
|--------------------|-----------|----------------------|
| 19332 hsa-mir-3647 | UBE2W     | 0.312358281 mirna_pc |
| 19333 hsa-mir-3647 | RTN4RL1   | 0.391444233 mirna_pc |
| 19334 hsa-mir-3647 | TRUB1     | 0.411289438 mirna_pc |
| 19335 hsa-mir-3647 | SLC38A2   | 0.329712101 mirna_pc |
| 19336 hsa-mir-3647 | C12orf24  | 0.312718678 mirna_pc |
| 19337 hsa-mir-3647 | CCDC102A  | 0.316264848 mirna_pc |
| 19338 hsa-mir-3647 | MTERF     | 0.305781556 mirna_pc |
| 19339 hsa-mir-3647 | SF3A1     | 0.301390255 mirna_pc |
| 19340 hsa-mir-3647 | USP13     | 0.323913541 mirna_pc |
| 19341 hsa-mir-3647 | IRX3      | 0.317047261 mirna_pc |
| 19342 hsa-mir-3647 | ESF1      | 0.325290896 mirna_pc |
| 19343 hsa-mir-3647 | GOPC      | 0.32021317 mirna_pc  |
| 19344 hsa-mir-3647 | SLITRK6   | 0.330699848 mirna_pc |
| 19345 hsa-mir-3647 | SFRS2IP   | 0.314172931 mirna_pc |
| 19346 hsa-mir-3647 | PPTC7     | 0.326083999 mirna_pc |
| 19347 hsa-mir-3647 | KIAA1586  | 0.304487367 mirna_pc |
| 19348 hsa-mir-3647 | C2orf3    | 0.420788009 mirna_pc |
| 19349 hsa-mir-3647 | TIA1      | 0.3698788 mirna_pc   |
| 19350 hsa-mir-3647 | ATL2      | 0.345793949 mirna_pc |
| 19351 hsa-mir-3647 | PDE7A     | 0.379196292 mirna_pc |
| 19352 hsa-mir-3647 | CREB1     | 0.311140072 mirna_pc |
| 19353 hsa-mir-3647 | C12orf65  | 0.320048605 mirna_pc |
| 19354 hsa-mir-3647 | MRPL19    | 0.360098118 mirna_pc |
| 19355 hsa-mir-3647 | ZCCHC11   | 0.324542897 mirna_pc |
| 19356 hsa-mir-3647 | CETN3     | 0.388908166 mirna_pc |
| 19357 hsa-mir-3647 | RSRC2     | 0.366444654 mirna_pc |
| 19358 hsa-mir-3647 | KIAA1430  | 0.306234696 mirna_pc |
| 19359 hsa-mir-3647 | KDM5A     | 0.313221317 mirna_pc |
| 19360 hsa-mir-3647 | CWC22     | 0.300095364 mirna_pc |
| 19361 hsa-mir-3647 | DDIT4     | 0.37984178 mirna_pc  |
| 19362 hsa-mir-3647 | HSDL1     | 0.341087777 mirna_pc |
| 19363 hsa-mir-3647 | FBX011    | 0.421674803 mirna_pc |
| 19364 hsa-mir-3647 | TMEM188   | 0.336044814 mirna_pc |
| 19365 hsa-mir-3647 | ZCCHC10   | 0.316194846 mirna_pc |
| 19366 hsa-mir-3647 | DNMT3A    | 0.304705553 mirna_pc |
| 19367 hsa-mir-3647 | TET1      | 0.301422437 mirna_pc |
| 19368 hsa-mir-3647 | CCDC88A   | 0.366865202 mirna_pc |
| 19369 hsa-mir-425  | MKI67     | 0.302175508 mirna_pc |
| 19370 hsa-mir-425  | TPX2      | 0.324738329 mirna_pc |
| 19371 hsa-mir-425  | KIF4B     | 0.318643172 mirna_pc |
| 19372 hsa-mir-425  | HOXC9     | 0.464425286 mirna_pc |
| 19373 hsa-mir-425  | RRM2      | 0.309475131 mirna_pc |
| 19374 hsa-mir-425  | CDC25C    | 0.364116001 mirna_pc |
| 19375 hsa-mir-425  | UBE2C     | 0.350913248 mirna_pc |
| 19376 hsa-mir-425  | KIFC1     | 0.390809025 mirna_pc |
| 19377 hsa-mir-425  | BUB1B     | 0.354114064 mirna_pc |
| 19378 hsa-mir-425  | FAM72A    | 0.34018474 mirna_pc  |
| 19379 hsa-mir-425  | CLSPN     | 0.307406375 mirna_pc |
| 19380 hsa-mir-425  | SGOL1     | 0.481136786 mirna_pc |
| 19381 hsa-mir-425  | ARHGAP11A | 0.368440839 mirna_pc |
| 19382 hsa-mir-425  | NEK2      | 0.336984607 mirna_pc |
| 19383 hsa-mir-425  | HOXC11    | 0.350524953 mirna_pc |
| 19384 hsa-mir-425  | CDC48     | 0.4079201 mirna_pc   |
| 19385 hsa-mir-425  | STIL      | 0.351023528 mirna_pc |

|                   |           |                      |
|-------------------|-----------|----------------------|
| 19386 hsa-mir-425 | KIF4A     | 0.369142976 mirna_pc |
| 19387 hsa-mir-425 | DEPDC1    | 0.321596892 mirna_pc |
| 19388 hsa-mir-425 | SKA3      | 0.327486599 mirna_pc |
| 19389 hsa-mir-425 | BLM       | 0.403944139 mirna_pc |
| 19390 hsa-mir-425 | CCDC150   | 0.303418404 mirna_pc |
| 19391 hsa-mir-425 | OIP5      | 0.408815817 mirna_pc |
| 19392 hsa-mir-425 | AURKA     | 0.363942981 mirna_pc |
| 19393 hsa-mir-425 | CENPK     | 0.320028792 mirna_pc |
| 19394 hsa-mir-425 | SGOL2     | 0.340772057 mirna_pc |
| 19395 hsa-mir-425 | HBB       | 0.413885586 mirna_pc |
| 19396 hsa-mir-425 | KIF15     | 0.44910389 mirna_pc  |
| 19397 hsa-mir-425 | FEN1      | 0.327908395 mirna_pc |
| 19398 hsa-mir-425 | TRAIP     | 0.461128045 mirna_pc |
| 19399 hsa-mir-425 | FAM72D    | 0.375244242 mirna_pc |
| 19400 hsa-mir-425 | FAM72B    | 0.335185497 mirna_pc |
| 19401 hsa-mir-425 | C12orf48  | 0.386985599 mirna_pc |
| 19402 hsa-mir-425 | HMMR      | 0.328046465 mirna_pc |
| 19403 hsa-mir-425 | ZWINT     | 0.40175676 mirna_pc  |
| 19404 hsa-mir-425 | BUB3      | 0.327825455 mirna_pc |
| 19405 hsa-mir-425 | PDHB      | 0.345276352 mirna_pc |
| 19406 hsa-mir-425 | CDCA7     | 0.311862443 mirna_pc |
| 19407 hsa-mir-425 | PIF1      | 0.370427445 mirna_pc |
| 19408 hsa-mir-425 | DNAH3     | 0.355479039 mirna_pc |
| 19409 hsa-mir-425 | E2F1      | 0.315809867 mirna_pc |
| 19410 hsa-mir-425 | E2F2      | 0.301467135 mirna_pc |
| 19411 hsa-mir-425 | DEPDC1B   | 0.352042791 mirna_pc |
| 19412 hsa-mir-425 | POC1A     | 0.391921343 mirna_pc |
| 19413 hsa-mir-425 | DNA2      | 0.365673141 mirna_pc |
| 19414 hsa-mir-425 | NEURL3    | 0.369441377 mirna_pc |
| 19415 hsa-mir-425 | SNHG1     | 0.321309776 mirna_pc |
| 19416 hsa-mir-425 | CCDC99    | 0.308174904 mirna_pc |
| 19417 hsa-mir-425 | HOXA10    | 0.330683203 mirna_pc |
| 19418 hsa-mir-425 | DLEU2     | 0.320042471 mirna_pc |
| 19419 hsa-mir-425 | PRIM1     | 0.341478009 mirna_pc |
| 19420 hsa-mir-425 | DDX27     | 0.363805164 mirna_pc |
| 19421 hsa-mir-425 | HOXC10    | 0.335687632 mirna_pc |
| 19422 hsa-mir-425 | MSH2      | 0.316234807 mirna_pc |
| 19423 hsa-mir-425 | SALL4     | 0.349757645 mirna_pc |
| 19424 hsa-mir-425 | NOP58     | 0.304797342 mirna_pc |
| 19425 hsa-mir-425 | SSB       | 0.347555432 mirna_pc |
| 19426 hsa-mir-425 | SNRPC     | 0.35033412 mirna_pc  |
| 19427 hsa-mir-425 | E2F3      | 0.423934026 mirna_pc |
| 19428 hsa-mir-425 | MEG3      | 0.312984807 mirna_pc |
| 19429 hsa-mir-425 | CDC25A    | 0.447595237 mirna_pc |
| 19430 hsa-mir-425 | TMEM48    | 0.334779679 mirna_pc |
| 19431 hsa-mir-425 | SRPK1     | 0.332780062 mirna_pc |
| 19432 hsa-mir-425 | MCM8      | 0.345264715 mirna_pc |
| 19433 hsa-mir-425 | ATIC      | 0.301923143 mirna_pc |
| 19434 hsa-mir-425 | MARCKSL1  | 0.331939544 mirna_pc |
| 19435 hsa-mir-425 | CBX8      | 0.352670189 mirna_pc |
| 19436 hsa-mir-425 | SASS6     | 0.335661871 mirna_pc |
| 19437 hsa-mir-425 | TMPO      | 0.352804351 mirna_pc |
| 19438 hsa-mir-425 | LOC388796 | 0.336062421 mirna_pc |
| 19439 hsa-mir-425 | RPP14     | 0.39480322 mirna_pc  |

|                   |          |                      |
|-------------------|----------|----------------------|
| 19440 hsa-mir-425 | CHRNA5   | 0.391856217 mirna_pc |
| 19441 hsa-mir-425 | SFRS1    | 0.329208344 mirna_pc |
| 19442 hsa-mir-425 | CASP8    | 0.321819651 mirna_pc |
| 19443 hsa-mir-425 | GAD1     | 0.329480624 mirna_pc |
| 19444 hsa-mir-425 | DNMT3B   | 0.369274871 mirna_pc |
| 19445 hsa-mir-425 | DARS2    | 0.30979098 mirna_pc  |
| 19446 hsa-mir-425 | HSPD1    | 0.348592485 mirna_pc |
| 19447 hsa-mir-425 | PA2G4    | 0.347416952 mirna_pc |
| 19448 hsa-mir-425 | SLC5A6   | 0.398242488 mirna_pc |
| 19449 hsa-mir-425 | TOMM34   | 0.347441109 mirna_pc |
| 19450 hsa-mir-425 | MAPRE1   | 0.324538533 mirna_pc |
| 19451 hsa-mir-425 | CCDC18   | 0.315521481 mirna_pc |
| 19452 hsa-mir-425 | AHCY     | 0.348225779 mirna_pc |
| 19453 hsa-mir-425 | CCNE1    | 0.323263667 mirna_pc |
| 19454 hsa-mir-425 | ZNF695   | 0.424644937 mirna_pc |
| 19455 hsa-mir-425 | PDSS1    | 0.31458792 mirna_pc  |
| 19456 hsa-mir-425 | HAUS6    | 0.315391831 mirna_pc |
| 19457 hsa-mir-425 | OBFC2B   | 0.45700272 mirna_pc  |
| 19458 hsa-mir-425 | PTMA     | 0.301172162 mirna_pc |
| 19459 hsa-mir-425 | SCARB1   | 0.460208839 mirna_pc |
| 19460 hsa-mir-425 | SUV39H2  | 0.328242127 mirna_pc |
| 19461 hsa-mir-425 | LSM 2.00 | 0.329164732 mirna_pc |
| 19462 hsa-mir-425 | ALG6     | 0.336263852 mirna_pc |
| 19463 hsa-mir-425 | RIBC2    | 0.315791207 mirna_pc |
| 19464 hsa-mir-425 | RRP9     | 0.322513377 mirna_pc |
| 19465 hsa-mir-425 | TFR2     | 0.319726629 mirna_pc |
| 19466 hsa-mir-425 | SFRS3    | 0.361007579 mirna_pc |
| 19467 hsa-mir-425 | C6orf223 | 0.303906442 mirna_pc |
| 19468 hsa-mir-425 | HSP90B1  | 0.487113926 mirna_pc |
| 19469 hsa-mir-425 | RBM6     | 0.34665387 mirna_pc  |
| 19470 hsa-mir-425 | PAK1IP1  | 0.355130836 mirna_pc |
| 19471 hsa-mir-425 | EDEM2    | 0.385535043 mirna_pc |
| 19472 hsa-mir-425 | C1orf59  | 0.318790683 mirna_pc |
| 19473 hsa-mir-425 | EPCAM    | 0.356325454 mirna_pc |
| 19474 hsa-mir-425 | EHMT2    | 0.426329308 mirna_pc |
| 19475 hsa-mir-425 | GAS2L3   | 0.320713062 mirna_pc |
| 19476 hsa-mir-425 | PDRG1    | 0.376030744 mirna_pc |
| 19477 hsa-mir-425 | PASK     | 0.323099298 mirna_pc |
| 19478 hsa-mir-425 | WDR46    | 0.330518424 mirna_pc |
| 19479 hsa-mir-425 | TAF4     | 0.380757436 mirna_pc |
| 19480 hsa-mir-425 | SNRNPB2  | 0.318403849 mirna_pc |
| 19481 hsa-mir-425 | GLO1     | 0.312875145 mirna_pc |
| 19482 hsa-mir-425 | ZBTB9    | 0.368370861 mirna_pc |
| 19483 hsa-mir-425 | CSRP2BP  | 0.353097613 mirna_pc |
| 19484 hsa-mir-425 | RPN2     | 0.403944533 mirna_pc |
| 19485 hsa-mir-425 | KCTD6    | 0.46994914 mirna_pc  |
| 19486 hsa-mir-425 | ITGB3BP  | 0.319411339 mirna_pc |
| 19487 hsa-mir-425 | EIF2S2   | 0.321360689 mirna_pc |
| 19488 hsa-mir-425 | PABPC1L  | 0.352723954 mirna_pc |
| 19489 hsa-mir-425 | C17orf42 | 0.381249015 mirna_pc |
| 19490 hsa-mir-425 | DNAJC7   | 0.320419708 mirna_pc |
| 19491 hsa-mir-425 | TSEN54   | 0.362688436 mirna_pc |
| 19492 hsa-mir-425 | ACTR5    | 0.325438343 mirna_pc |
| 19493 hsa-mir-425 | ZNF595   | 0.343974262 mirna_pc |

|                   |          |                      |
|-------------------|----------|----------------------|
| 19494 hsa-mir-425 | DDX55    | 0.340523652 mirna_pc |
| 19495 hsa-mir-425 | HPDL     | 0.320624368 mirna_pc |
| 19496 hsa-mir-425 | CDK5RAP1 | 0.3483867 mirna_pc   |
| 19497 hsa-mir-425 | RCOR2    | 0.322027284 mirna_pc |
| 19498 hsa-mir-425 | ATAD3A   | 0.357389233 mirna_pc |
| 19499 hsa-mir-425 | POLA1    | 0.30423333 mirna_pc  |
| 19500 hsa-mir-425 | HDAC2    | 0.395968806 mirna_pc |
| 19501 hsa-mir-425 | GMNN     | 0.327266812 mirna_pc |
| 19502 hsa-mir-425 | PA2G4P4  | 0.40751613 mirna_pc  |
| 19503 hsa-mir-425 | ASCL2    | 0.348161445 mirna_pc |
| 19504 hsa-mir-425 | BRI3BP   | 0.30182051 mirna_pc  |
| 19505 hsa-mir-425 | FLVCR1   | 0.32959496 mirna_pc  |
| 19506 hsa-mir-425 | NUDT3    | 0.307857375 mirna_pc |
| 19507 hsa-mir-425 | AGMAT    | 0.365430012 mirna_pc |
| 19508 hsa-mir-425 | BAT1     | 0.460841641 mirna_pc |
| 19509 hsa-mir-425 | VAR5     | 0.35353818 mirna_pc  |
| 19510 hsa-mir-425 | ZSCAN2   | 0.326914625 mirna_pc |
| 19511 hsa-mir-425 | MSH5     | 0.381555002 mirna_pc |
| 19512 hsa-mir-425 | PDIA3    | 0.341501038 mirna_pc |
| 19513 hsa-mir-425 | C2orf29  | 0.30721791 mirna_pc  |
| 19514 hsa-mir-425 | ACAN     | 0.518416359 mirna_pc |
| 19515 hsa-mir-425 | B3GALT6  | 0.323846253 mirna_pc |
| 19516 hsa-mir-425 | SUZ12    | 0.355033412 mirna_pc |
| 19517 hsa-mir-425 | ZBTB12   | 0.387594551 mirna_pc |
| 19518 hsa-mir-425 | PBRM1    | 0.336116382 mirna_pc |
| 19519 hsa-mir-425 | PIK3AP1  | 0.407831616 mirna_pc |
| 19520 hsa-mir-425 | CIB2     | 0.364403722 mirna_pc |
| 19521 hsa-mir-425 | FAM96A   | 0.384477358 mirna_pc |
| 19522 hsa-mir-425 | SC65     | 0.387098171 mirna_pc |
| 19523 hsa-mir-425 | FGFR10P  | 0.346940937 mirna_pc |
| 19524 hsa-mir-425 | METTL13  | 0.317519811 mirna_pc |
| 19525 hsa-mir-425 | POLE     | 0.303609425 mirna_pc |
| 19526 hsa-mir-425 | C1orf163 | 0.325482996 mirna_pc |
| 19527 hsa-mir-425 | TRIAP1   | 0.335564727 mirna_pc |
| 19528 hsa-mir-425 | SOX9     | 0.301982659 mirna_pc |
| 19529 hsa-mir-425 | C13orf27 | 0.332393669 mirna_pc |
| 19530 hsa-mir-425 | DDOST    | 0.327818474 mirna_pc |
| 19531 hsa-mir-425 | GK3P     | 0.319553303 mirna_pc |
| 19532 hsa-mir-425 | RBMX     | 0.314750818 mirna_pc |
| 19533 hsa-mir-425 | C9orf142 | 0.319950685 mirna_pc |
| 19534 hsa-mir-425 | PDIA3P   | 0.311827157 mirna_pc |
| 19535 hsa-mir-425 | MDC 1.00 | 0.325067495 mirna_pc |
| 19536 hsa-mir-425 | ATAD3B   | 0.427365629 mirna_pc |
| 19537 hsa-mir-425 | C11orf48 | 0.352768137 mirna_pc |
| 19538 hsa-mir-425 | PDIA6    | 0.33031557 mirna_pc  |
| 19539 hsa-mir-425 | LINGO1   | 0.346913605 mirna_pc |
| 19540 hsa-mir-425 | DNAJC14  | 0.405963469 mirna_pc |
| 19541 hsa-mir-425 | DTNBP1   | 0.333437726 mirna_pc |
| 19542 hsa-mir-425 | PUSL1    | 0.315309432 mirna_pc |
| 19543 hsa-mir-425 | GK       | 0.337876558 mirna_pc |
| 19544 hsa-mir-425 | ABCF1    | 0.307319165 mirna_pc |
| 19545 hsa-mir-425 | CNPY2    | 0.324403349 mirna_pc |
| 19546 hsa-mir-425 | MPV17L   | 0.325730552 mirna_pc |
| 19547 hsa-mir-425 | FAM136A  | 0.390583107 mirna_pc |

|                   |           |                      |
|-------------------|-----------|----------------------|
| 19548 hsa-mir-425 | GDPD5     | 0.561342053 mirna_pc |
| 19549 hsa-mir-425 | SNORA8    | 0.338419646 mirna_pc |
| 19550 hsa-mir-425 | EML4      | 0.382724879 mirna_pc |
| 19551 hsa-mir-425 | LOC401010 | 0.302410301 mirna_pc |
| 19552 hsa-mir-425 | STRA13    | 0.341708852 mirna_pc |
| 19553 hsa-mir-425 | RPIA      | 0.305185657 mirna_pc |
| 19554 hsa-mir-425 | NOTUM     | 0.344357135 mirna_pc |
| 19555 hsa-mir-425 | NAT9      | 0.382671337 mirna_pc |
| 19556 hsa-mir-425 | KIAA1731  | 0.439197858 mirna_pc |
| 19557 hsa-mir-425 | SLC27A2   | 0.318433744 mirna_pc |
| 19558 hsa-mir-425 | PNRC2     | 0.303511254 mirna_pc |
| 19559 hsa-mir-425 | SPCS1     | 0.386780291 mirna_pc |
| 19560 hsa-mir-425 | SFXN4     | 0.335981065 mirna_pc |
| 19561 hsa-mir-425 | TAF11     | 0.320025562 mirna_pc |
| 19562 hsa-mir-425 | MINPP1    | 0.31759806 mirna_pc  |
| 19563 hsa-mir-425 | RANBP17   | 0.390178073 mirna_pc |
| 19564 hsa-mir-425 | TMEM180   | 0.303723219 mirna_pc |
| 19565 hsa-mir-425 | ACOT4     | 0.326982705 mirna_pc |
| 19566 hsa-mir-425 | DAGLA     | 0.315061031 mirna_pc |
| 19567 hsa-mir-425 | CRLS1     | 0.361570862 mirna_pc |
| 19568 hsa-mir-425 | RWDD3     | 0.306961001 mirna_pc |
| 19569 hsa-mir-425 | ZNF620    | 0.311266853 mirna_pc |
| 19570 hsa-mir-425 | RNF34     | 0.340460035 mirna_pc |
| 19571 hsa-mir-425 | CHD7      | 0.345160504 mirna_pc |
| 19572 hsa-mir-425 | TOP 1.00  | 0.330460655 mirna_pc |
| 19573 hsa-mir-425 | FKBP10    | 0.322188985 mirna_pc |
| 19574 hsa-mir-425 | SEC61A2   | 0.373266319 mirna_pc |
| 19575 hsa-mir-425 | ZNF35     | 0.369025272 mirna_pc |
| 19576 hsa-mir-425 | MAPKAPK5  | 0.383773181 mirna_pc |
| 19577 hsa-mir-425 | GMCL1     | 0.344455686 mirna_pc |
| 19578 hsa-mir-425 | ZNF833    | 0.35503808 mirna_pc  |
| 19579 hsa-mir-425 | SLC25A15  | 0.302254035 mirna_pc |
| 19580 hsa-mir-425 | B4GALT3   | 0.330435532 mirna_pc |
| 19581 hsa-mir-425 | SFRS13A   | 0.325481901 mirna_pc |
| 19582 hsa-mir-425 | TFAM      | 0.405312913 mirna_pc |
| 19583 hsa-mir-425 | NME6      | 0.314019275 mirna_pc |
| 19584 hsa-mir-425 | EAF1      | 0.320194074 mirna_pc |
| 19585 hsa-mir-425 | MORF4L1   | 0.301595003 mirna_pc |
| 19586 hsa-mir-425 | ACVR2B    | 0.318969248 mirna_pc |
| 19587 hsa-mir-425 | DCP1A     | 0.525550684 mirna_pc |
| 19588 hsa-mir-425 | GNL3      | 0.515725031 mirna_pc |
| 19589 hsa-mir-425 | METTL7B   | 0.343255568 mirna_pc |
| 19590 hsa-mir-425 | HCG18     | 0.331533582 mirna_pc |
| 19591 hsa-mir-425 | SLC25A19  | 0.358442463 mirna_pc |
| 19592 hsa-mir-425 | BEND3     | 0.387454856 mirna_pc |
| 19593 hsa-mir-425 | CRNKL1    | 0.332042527 mirna_pc |
| 19594 hsa-mir-425 | FZD5      | 0.323014442 mirna_pc |
| 19595 hsa-mir-425 | FGFR4     | 0.40313676 mirna_pc  |
| 19596 hsa-mir-425 | CCAR1     | 0.35473688 mirna_pc  |
| 19597 hsa-mir-425 | C3orf63   | 0.3122266 mirna_pc   |
| 19598 hsa-mir-425 | ZNF184    | 0.306096803 mirna_pc |
| 19599 hsa-mir-425 | ATXN2     | 0.305944047 mirna_pc |
| 19600 hsa-mir-425 | SFMBT1    | 0.502760999 mirna_pc |
| 19601 hsa-mir-425 | GGT1      | 0.381089608 mirna_pc |

|                   |          |                      |
|-------------------|----------|----------------------|
| 19602 hsa-mir-425 | ZSCAN16  | 0.320960077 mirna_pc |
| 19603 hsa-mir-425 | SEC11A   | 0.342219559 mirna_pc |
| 19604 hsa-mir-425 | ZNF780A  | 0.387592551 mirna_pc |
| 19605 hsa-mir-425 | CHDH     | 0.439067664 mirna_pc |
| 19606 hsa-mir-425 | EEF1E1   | 0.350651488 mirna_pc |
| 19607 hsa-mir-425 | ZNF697   | 0.377913158 mirna_pc |
| 19608 hsa-mir-425 | MRPL44   | 0.321737186 mirna_pc |
| 19609 hsa-mir-425 | SPRY4    | 0.422256762 mirna_pc |
| 19610 hsa-mir-425 | GJB1     | 0.401601654 mirna_pc |
| 19611 hsa-mir-425 | ZNF92    | 0.385631169 mirna_pc |
| 19612 hsa-mir-425 | TMTC4    | 0.30969529 mirna_pc  |
| 19613 hsa-mir-425 | ACY1     | 0.302036652 mirna_pc |
| 19614 hsa-mir-425 | ZNF259   | 0.315563098 mirna_pc |
| 19615 hsa-mir-425 | RPS6KL1  | 0.345424309 mirna_pc |
| 19616 hsa-mir-425 | GLYCTK   | 0.350798588 mirna_pc |
| 19617 hsa-mir-425 | DDAH2    | 0.350495414 mirna_pc |
| 19618 hsa-mir-425 | NEK4     | 0.529212684 mirna_pc |
| 19619 hsa-mir-425 | CNNM3    | 0.347282515 mirna_pc |
| 19620 hsa-mir-425 | PCMTD2   | 0.329849622 mirna_pc |
| 19621 hsa-mir-425 | DPAGT1   | 0.427332436 mirna_pc |
| 19622 hsa-mir-425 | YBX2     | 0.371780728 mirna_pc |
| 19623 hsa-mir-425 | GPR137C  | 0.351696276 mirna_pc |
| 19624 hsa-mir-425 | NUP43    | 0.32967557 mirna_pc  |
| 19625 hsa-mir-425 | RNF41    | 0.375386297 mirna_pc |
| 19626 hsa-mir-425 | ZNF124   | 0.388859324 mirna_pc |
| 19627 hsa-mir-425 | DGAT2    | 0.318489466 mirna_pc |
| 19628 hsa-mir-425 | TMEM62   | 0.348751745 mirna_pc |
| 19629 hsa-mir-425 | GRB14    | 0.336713788 mirna_pc |
| 19630 hsa-mir-425 | CHD1L    | 0.342978285 mirna_pc |
| 19631 hsa-mir-425 | ZNF473   | 0.309534875 mirna_pc |
| 19632 hsa-mir-425 | SNRNP48  | 0.335205994 mirna_pc |
| 19633 hsa-mir-425 | RFT1     | 0.415567454 mirna_pc |
| 19634 hsa-mir-425 | DCLRE1A  | 0.347398522 mirna_pc |
| 19635 hsa-mir-425 | RNF5     | 0.351302575 mirna_pc |
| 19636 hsa-mir-425 | ANP32A   | 0.354867233 mirna_pc |
| 19637 hsa-mir-425 | E2F5     | 0.38445207 mirna_pc  |
| 19638 hsa-mir-425 | TMED5    | 0.345037884 mirna_pc |
| 19639 hsa-mir-425 | SEPHS2   | 0.324639672 mirna_pc |
| 19640 hsa-mir-425 | ZNF195   | 0.444441752 mirna_pc |
| 19641 hsa-mir-425 | MANF     | 0.461140853 mirna_pc |
| 19642 hsa-mir-425 | UBE2J2   | 0.30339705 mirna_pc  |
| 19643 hsa-mir-425 | GLT8D1   | 0.437079558 mirna_pc |
| 19644 hsa-mir-425 | KIF3B    | 0.304759121 mirna_pc |
| 19645 hsa-mir-425 | SERPINA1 | 0.346707087 mirna_pc |
| 19646 hsa-mir-425 | VIL1     | 0.357412746 mirna_pc |
| 19647 hsa-mir-425 | SPCS2    | 0.347402098 mirna_pc |
| 19648 hsa-mir-425 | ASRGL1   | 0.367244306 mirna_pc |
| 19649 hsa-mir-425 | VPRBP    | 0.311148095 mirna_pc |
| 19650 hsa-mir-425 | PHF16    | 0.417955524 mirna_pc |
| 19651 hsa-mir-425 | BUD13    | 0.314264599 mirna_pc |
| 19652 hsa-mir-425 | MANEAL   | 0.307424335 mirna_pc |
| 19653 hsa-mir-425 | APAF1    | 0.303214611 mirna_pc |
| 19654 hsa-mir-425 | ZNF485   | 0.322053265 mirna_pc |
| 19655 hsa-mir-425 | KIN      | 0.324752826 mirna_pc |



|                   |              |                      |
|-------------------|--------------|----------------------|
| 19656 hsa-mir-425 | CMC1         | 0.320685382 mirna_pc |
| 19657 hsa-mir-425 | TRUB1        | 0.300680648 mirna_pc |
| 19658 hsa-mir-425 | C2orf15      | 0.384419908 mirna_pc |
| 19659 hsa-mir-425 | SLFN13       | 0.342846216 mirna_pc |
| 19660 hsa-mir-425 | CCNJ         | 0.437997144 mirna_pc |
| 19661 hsa-mir-425 | FOXA2        | 0.396560818 mirna_pc |
| 19662 hsa-mir-425 | AEN          | 0.300922536 mirna_pc |
| 19663 hsa-mir-425 | GDF15        | 0.379076492 mirna_pc |
| 19664 hsa-mir-425 | TMEM52       | 0.457449814 mirna_pc |
| 19665 hsa-mir-425 | FAM171A1     | 0.315258331 mirna_pc |
| 19666 hsa-mir-425 | ESF1         | 0.324368343 mirna_pc |
| 19667 hsa-mir-425 | HS2ST1       | 0.469027349 mirna_pc |
| 19668 hsa-mir-425 | SLC25A33     | 0.421262523 mirna_pc |
| 19669 hsa-mir-425 | GTF2H2C      | 0.368721892 mirna_pc |
| 19670 hsa-mir-425 | SMARCC1      | 0.341431351 mirna_pc |
| 19671 hsa-mir-425 | C2orf72      | 0.364432734 mirna_pc |
| 19672 hsa-mir-425 | NR5A2        | 0.369074442 mirna_pc |
| 19673 hsa-mir-425 | CTPS2        | 0.382476156 mirna_pc |
| 19674 hsa-mir-425 | KIF9         | 0.392119638 mirna_pc |
| 19675 hsa-mir-425 | GXYLT1       | 0.359337992 mirna_pc |
| 19676 hsa-mir-425 | RND1         | 0.302132423 mirna_pc |
| 19677 hsa-mir-425 | C10orf88     | 0.393590216 mirna_pc |
| 19678 hsa-mir-425 | MRPL20       | 0.303158859 mirna_pc |
| 19679 hsa-mir-425 | HNF1A        | 0.347042705 mirna_pc |
| 19680 hsa-mir-425 | C20orf46     | 0.383664732 mirna_pc |
| 19681 hsa-mir-425 | SNCAIP       | 0.386164654 mirna_pc |
| 19682 hsa-mir-425 | KIF12        | 0.528637634 mirna_pc |
| 19683 hsa-mir-425 | RNF32        | 0.423196632 mirna_pc |
| 19684 hsa-mir-425 | BMI1         | 0.30761929 mirna_pc  |
| 19685 hsa-mir-425 | CYB561D2     | 0.325044665 mirna_pc |
| 19686 hsa-mir-425 | METTL12      | 0.308435229 mirna_pc |
| 19687 hsa-mir-425 | ENO3         | 0.384793646 mirna_pc |
| 19688 hsa-mir-425 | MED17        | 0.413843686 mirna_pc |
| 19689 hsa-mir-425 | VPS54        | 0.339033035 mirna_pc |
| 19690 hsa-mir-425 | ID2          | 0.424446556 mirna_pc |
| 19691 hsa-mir-425 | HYOU1        | 0.422785059 mirna_pc |
| 19692 hsa-mir-425 | C3orf75      | 0.399481266 mirna_pc |
| 19693 hsa-mir-425 | XYLB         | 0.36469966 mirna_pc  |
| 19694 hsa-mir-425 | LOC221710    | 0.342398326 mirna_pc |
| 19695 hsa-mir-425 | ERBB3        | 0.3767217 mirna_pc   |
| 19696 hsa-mir-425 | PLIN2        | 0.400569764 mirna_pc |
| 19697 hsa-mir-425 | LOC100130581 | 0.329977915 mirna_pc |
| 19698 hsa-mir-425 | LOC653566    | 0.313474755 mirna_pc |
| 19699 hsa-mir-425 | SYS1         | 0.330232411 mirna_pc |
| 19700 hsa-mir-425 | CCNI2        | 0.394424184 mirna_pc |
| 19701 hsa-mir-425 | CRYZ         | 0.300301678 mirna_pc |
| 19702 hsa-mir-425 | DHRS2        | 0.347521308 mirna_pc |
| 19703 hsa-mir-425 | ZNF664       | 0.382480747 mirna_pc |
| 19704 hsa-mir-425 | SLC39A7      | 0.339983105 mirna_pc |
| 19705 hsa-mir-425 | GOLT1A       | 0.316440792 mirna_pc |
| 19706 hsa-mir-425 | C20orf96     | 0.421379361 mirna_pc |
| 19707 hsa-mir-425 | PPP4R2       | 0.439330117 mirna_pc |
| 19708 hsa-mir-425 | ZCCHC3       | 0.379985403 mirna_pc |
| 19709 hsa-mir-425 | WDR73        | 0.505014249 mirna_pc |

|                   |         |                      |
|-------------------|---------|----------------------|
| 19710 hsa-mir-425 | UBA3    | 0.317023961 mirna_pc |
| 19711 hsa-mir-425 | PROX1   | 0.379864461 mirna_pc |
| 19712 hsa-mir-425 | STX3    | 0.31079022 mirna_pc  |
| 19713 hsa-mir-425 | C2orf43 | 0.336891269 mirna_pc |
| 19714 hsa-mir-425 | RNF5P1  | 0.345482484 mirna_pc |
| 19715 hsa-mir-425 | IL17RB  | 0.452979281 mirna_pc |
| 19716 hsa-mir-425 | ZNF341  | 0.315416713 mirna_pc |
| 19717 hsa-mir-425 | SEC23B  | 0.327379938 mirna_pc |
| 19718 hsa-mir-425 | CD320   | 0.324799291 mirna_pc |
| 19719 hsa-mir-425 | QPRT    | 0.322162636 mirna_pc |
| 19720 hsa-mir-425 | PREB    | 0.311778682 mirna_pc |
| 19721 hsa-mir-425 | ZNF443  | 0.377234356 mirna_pc |
| 19722 hsa-mir-425 | PRMT6   | 0.34312912 mirna_pc  |
| 19723 hsa-mir-425 | CACNA1D | 0.387168718 mirna_pc |
| 19724 hsa-mir-425 | NEU1    | 0.363228157 mirna_pc |
| 19725 hsa-mir-425 | TMED2   | 0.315288267 mirna_pc |
| 19726 hsa-mir-425 | SLC11A2 | 0.301377675 mirna_pc |
| 19727 hsa-mir-425 | PNKD    | 0.390211855 mirna_pc |
| 19728 hsa-mir-425 | BMF     | 0.320737176 mirna_pc |
| 19729 hsa-mir-425 | BAT3    | 0.309056355 mirna_pc |
| 19730 hsa-mir-425 | PRDX3   | 0.315594652 mirna_pc |
| 19731 hsa-mir-425 | ZNF799  | 0.408072205 mirna_pc |
| 19732 hsa-mir-425 | ZNF239  | 0.40350361 mirna_pc  |
| 19733 hsa-mir-425 | TMEM14B | 0.36714348 mirna_pc  |
| 19734 hsa-mir-425 | NES     | 0.365545047 mirna_pc |
| 19735 hsa-mir-425 | SRCIN1  | 0.361480075 mirna_pc |
| 19736 hsa-mir-425 | ZNF77   | 0.4692047 mirna_pc   |
| 19737 hsa-mir-425 | ZNF468  | 0.396721012 mirna_pc |
| 19738 hsa-mir-425 | SLC37A4 | 0.364620064 mirna_pc |
| 19739 hsa-mir-425 | EIF2S3  | 0.306316173 mirna_pc |
| 19740 hsa-mir-425 | CENPV   | 0.409422082 mirna_pc |
| 19741 hsa-mir-425 | WDSUB1  | 0.320803321 mirna_pc |
| 19742 hsa-mir-425 | NLK     | 0.309767925 mirna_pc |
| 19743 hsa-mir-425 | ZNF670  | 0.335890542 mirna_pc |
| 19744 hsa-mir-425 | ZNF28   | 0.308215982 mirna_pc |
| 19745 hsa-mir-425 | COQ5    | 0.33177327 mirna_pc  |
| 19746 hsa-mir-425 | PIGM    | 0.361131058 mirna_pc |
| 19747 hsa-mir-425 | SLC2A8  | 0.382661199 mirna_pc |
| 19748 hsa-mir-425 | DOM3Z   | 0.376176554 mirna_pc |
| 19749 hsa-mir-425 | ARSE    | 0.340605955 mirna_pc |
| 19750 hsa-mir-425 | SS18L1  | 0.36662161 mirna_pc  |
| 19751 hsa-mir-92b | TPX2    | 0.344108214 mirna_pc |
| 19752 hsa-mir-92b | CENPF   | 0.318232699 mirna_pc |
| 19753 hsa-mir-92b | RCC2    | 0.3033912 mirna_pc   |
| 19754 hsa-mir-92b | HOXC9   | 0.395330212 mirna_pc |
| 19755 hsa-mir-92b | KIF11   | 0.352124393 mirna_pc |
| 19756 hsa-mir-92b | ECT2    | 0.309724323 mirna_pc |
| 19757 hsa-mir-92b | CDK1    | 0.333294514 mirna_pc |
| 19758 hsa-mir-92b | CDC25C  | 0.308666546 mirna_pc |
| 19759 hsa-mir-92b | SEMA3E  | 0.431326878 mirna_pc |
| 19760 hsa-mir-92b | PLK1    | 0.356830225 mirna_pc |
| 19761 hsa-mir-92b | UBE2C   | 0.373963358 mirna_pc |
| 19762 hsa-mir-92b | BUB1    | 0.320324397 mirna_pc |
| 19763 hsa-mir-92b | PRC1    | 0.385891243 mirna_pc |

|                   |          |                      |
|-------------------|----------|----------------------|
| 19764 hsa-mir-92b | NUSAP1   | 0.380710752 mirna_pc |
| 19765 hsa-mir-92b | KIFC1    | 0.383529508 mirna_pc |
| 19766 hsa-mir-92b | BUB1B    | 0.370863076 mirna_pc |
| 19767 hsa-mir-92b | HDGF     | 0.428137512 mirna_pc |
| 19768 hsa-mir-92b | FAM72A   | 0.388148453 mirna_pc |
| 19769 hsa-mir-92b | KIF2C    | 0.32379199 mirna_pc  |
| 19770 hsa-mir-92b | FANCA    | 0.319603443 mirna_pc |
| 19771 hsa-mir-92b | NCAPG    | 0.411729585 mirna_pc |
| 19772 hsa-mir-92b | CCNA2    | 0.354739975 mirna_pc |
| 19773 hsa-mir-92b | CEP55    | 0.306622753 mirna_pc |
| 19774 hsa-mir-92b | SPC25    | 0.405303996 mirna_pc |
| 19775 hsa-mir-92b | IQGAP3   | 0.309982144 mirna_pc |
| 19776 hsa-mir-92b | FANCI    | 0.316571673 mirna_pc |
| 19777 hsa-mir-92b | NEK2     | 0.51399111 mirna_pc  |
| 19778 hsa-mir-92b | MND1     | 0.381679248 mirna_pc |
| 19779 hsa-mir-92b | KIF22    | 0.424690579 mirna_pc |
| 19780 hsa-mir-92b | NCAPH    | 0.344563509 mirna_pc |
| 19781 hsa-mir-92b | RAD54L   | 0.383170523 mirna_pc |
| 19782 hsa-mir-92b | CENPA    | 0.326860632 mirna_pc |
| 19783 hsa-mir-92b | MAD2L1   | 0.46158417 mirna_pc  |
| 19784 hsa-mir-92b | TIMELESS | 0.343610529 mirna_pc |
| 19785 hsa-mir-92b | CDCA8    | 0.330598359 mirna_pc |
| 19786 hsa-mir-92b | TROAP    | 0.314702323 mirna_pc |
| 19787 hsa-mir-92b | CDCA5    | 0.353829506 mirna_pc |
| 19788 hsa-mir-92b | XP01     | 0.326053671 mirna_pc |
| 19789 hsa-mir-92b | CDC45    | 0.300624557 mirna_pc |
| 19790 hsa-mir-92b | STMN1    | 0.426653204 mirna_pc |
| 19791 hsa-mir-92b | EXO1     | 0.346031632 mirna_pc |
| 19792 hsa-mir-92b | UBE2T    | 0.504623037 mirna_pc |
| 19793 hsa-mir-92b | CKS2     | 0.381863795 mirna_pc |
| 19794 hsa-mir-92b | CKS1B    | 0.486857411 mirna_pc |
| 19795 hsa-mir-92b | TUBB     | 0.330784394 mirna_pc |
| 19796 hsa-mir-92b | NUF2     | 0.317781142 mirna_pc |
| 19797 hsa-mir-92b | PLK4     | 0.323928252 mirna_pc |
| 19798 hsa-mir-92b | DEPDC1   | 0.343712701 mirna_pc |
| 19799 hsa-mir-92b | HJURP    | 0.320570812 mirna_pc |
| 19800 hsa-mir-92b | RAD51    | 0.328311282 mirna_pc |
| 19801 hsa-mir-92b | BLM      | 0.336416051 mirna_pc |
| 19802 hsa-mir-92b | PAICS    | 0.320275887 mirna_pc |
| 19803 hsa-mir-92b | BIRC5    | 0.312659544 mirna_pc |
| 19804 hsa-mir-92b | OIP5     | 0.387167792 mirna_pc |
| 19805 hsa-mir-92b | DTL      | 0.399943738 mirna_pc |
| 19806 hsa-mir-92b | RECQL4   | 0.346257321 mirna_pc |
| 19807 hsa-mir-92b | CBFB     | 0.306054435 mirna_pc |
| 19808 hsa-mir-92b | CHEK2    | 0.385853278 mirna_pc |
| 19809 hsa-mir-92b | Clorf112 | 0.367673701 mirna_pc |
| 19810 hsa-mir-92b | FEN1     | 0.408668597 mirna_pc |
| 19811 hsa-mir-92b | C16orf59 | 0.414772574 mirna_pc |
| 19812 hsa-mir-92b | FAM72D   | 0.440290507 mirna_pc |
| 19813 hsa-mir-92b | FAM72B   | 0.367541455 mirna_pc |
| 19814 hsa-mir-92b | ZWINT    | 0.430960225 mirna_pc |
| 19815 hsa-mir-92b | TUBA1B   | 0.321274358 mirna_pc |
| 19816 hsa-mir-92b | WDR67    | 0.397134111 mirna_pc |
| 19817 hsa-mir-92b | HOXC6    | 0.310615269 mirna_pc |

|                   |          |                      |
|-------------------|----------|----------------------|
| 19818 hsa-mir-92b | BUB3     | 0.438225558 mirna_pc |
| 19819 hsa-mir-92b | CITED2   | 0.356195061 mirna_pc |
| 19820 hsa-mir-92b | UBE2S    | 0.386538848 mirna_pc |
| 19821 hsa-mir-92b | HNRNPC   | 0.332460138 mirna_pc |
| 19822 hsa-mir-92b | ILF2     | 0.388697512 mirna_pc |
| 19823 hsa-mir-92b | CHEK1    | 0.305869285 mirna_pc |
| 19824 hsa-mir-92b | TYMS     | 0.358139896 mirna_pc |
| 19825 hsa-mir-92b | MCM6     | 0.333048493 mirna_pc |
| 19826 hsa-mir-92b | EPR1     | 0.325780413 mirna_pc |
| 19827 hsa-mir-92b | H2AFX    | 0.31978975 mirna_pc  |
| 19828 hsa-mir-92b | UCK2     | 0.485481353 mirna_pc |
| 19829 hsa-mir-92b | NFKBIL2  | 0.335609331 mirna_pc |
| 19830 hsa-mir-92b | PRIM2    | 0.354649318 mirna_pc |
| 19831 hsa-mir-92b | FAM60A   | 0.328369371 mirna_pc |
| 19832 hsa-mir-92b | FAM64A   | 0.411066141 mirna_pc |
| 19833 hsa-mir-92b | RANBP1   | 0.309229584 mirna_pc |
| 19834 hsa-mir-92b | E2F1     | 0.374919992 mirna_pc |
| 19835 hsa-mir-92b | MCM3     | 0.324415029 mirna_pc |
| 19836 hsa-mir-92b | SNRPA    | 0.309298875 mirna_pc |
| 19837 hsa-mir-92b | FUS      | 0.379961892 mirna_pc |
| 19838 hsa-mir-92b | POC1A    | 0.337214784 mirna_pc |
| 19839 hsa-mir-92b | ANP32E   | 0.35372783 mirna_pc  |
| 19840 hsa-mir-92b | CENPO    | 0.420484942 mirna_pc |
| 19841 hsa-mir-92b | CENPL    | 0.342372958 mirna_pc |
| 19842 hsa-mir-92b | CCT3     | 0.328255867 mirna_pc |
| 19843 hsa-mir-92b | GINS2    | 0.331788255 mirna_pc |
| 19844 hsa-mir-92b | NR2F2    | 0.320109835 mirna_pc |
| 19845 hsa-mir-92b | SNRPD1   | 0.374246906 mirna_pc |
| 19846 hsa-mir-92b | DSN1     | 0.341092828 mirna_pc |
| 19847 hsa-mir-92b | SNHG1    | 0.318322841 mirna_pc |
| 19848 hsa-mir-92b | TMEM206  | 0.320547012 mirna_pc |
| 19849 hsa-mir-92b | C16orf75 | 0.354495216 mirna_pc |
| 19850 hsa-mir-92b | TCF19    | 0.300717111 mirna_pc |
| 19851 hsa-mir-92b | CAD      | 0.337887705 mirna_pc |
| 19852 hsa-mir-92b | CDK2     | 0.372037549 mirna_pc |
| 19853 hsa-mir-92b | CDK4     | 0.331271829 mirna_pc |
| 19854 hsa-mir-92b | HOXA10   | 0.346370972 mirna_pc |
| 19855 hsa-mir-92b | PFDN2    | 0.313146534 mirna_pc |
| 19856 hsa-mir-92b | CKAP5    | 0.325078382 mirna_pc |
| 19857 hsa-mir-92b | HNRNPR   | 0.384509962 mirna_pc |
| 19858 hsa-mir-92b | CENPH    | 0.319368466 mirna_pc |
| 19859 hsa-mir-92b | MSH2     | 0.401036619 mirna_pc |
| 19860 hsa-mir-92b | PRPF19   | 0.313293993 mirna_pc |
| 19861 hsa-mir-92b | EIF2AK1  | 0.311507601 mirna_pc |
| 19862 hsa-mir-92b | SF3B3    | 0.424553736 mirna_pc |
| 19863 hsa-mir-92b | CDC7     | 0.329377562 mirna_pc |
| 19864 hsa-mir-92b | SSB      | 0.346928008 mirna_pc |
| 19865 hsa-mir-92b | SNRPC    | 0.390763066 mirna_pc |
| 19866 hsa-mir-92b | TXNDC12  | 0.345900176 mirna_pc |
| 19867 hsa-mir-92b | PSMB4    | 0.308333767 mirna_pc |
| 19868 hsa-mir-92b | RFC4     | 0.309369471 mirna_pc |
| 19869 hsa-mir-92b | WDR75    | 0.372517474 mirna_pc |
| 19870 hsa-mir-92b | MDK      | 0.333341958 mirna_pc |
| 19871 hsa-mir-92b | BRIX1    | 0.372718701 mirna_pc |

|                   |              |                      |
|-------------------|--------------|----------------------|
| 19872 hsa-mir-92b | H2AFZ        | 0.359485585 mirna_pc |
| 19873 hsa-mir-92b | DSCC1        | 0.336455995 mirna_pc |
| 19874 hsa-mir-92b | SMC2         | 0.334022351 mirna_pc |
| 19875 hsa-mir-92b | SNRPE        | 0.473835747 mirna_pc |
| 19876 hsa-mir-92b | C21orf45     | 0.312792174 mirna_pc |
| 19877 hsa-mir-92b | ATIC         | 0.3143128 mirna_pc   |
| 19878 hsa-mir-92b | C5orf34      | 0.352435164 mirna_pc |
| 19879 hsa-mir-92b | MARCKSL1     | 0.411561001 mirna_pc |
| 19880 hsa-mir-92b | NPM3         | 0.38268146 mirna_pc  |
| 19881 hsa-mir-92b | ZNF367       | 0.34517517 mirna_pc  |
| 19882 hsa-mir-92b | NUTF2        | 0.35774574 mirna_pc  |
| 19883 hsa-mir-92b | RPA3         | 0.325619428 mirna_pc |
| 19884 hsa-mir-92b | WDR34        | 0.444746368 mirna_pc |
| 19885 hsa-mir-92b | MRPL9        | 0.382076515 mirna_pc |
| 19886 hsa-mir-92b | PFDN4        | 0.307786896 mirna_pc |
| 19887 hsa-mir-92b | DCTPP1       | 0.358352446 mirna_pc |
| 19888 hsa-mir-92b | PSRC1        | 0.377337447 mirna_pc |
| 19889 hsa-mir-92b | ODF2         | 0.386264258 mirna_pc |
| 19890 hsa-mir-92b | HIST1H1E     | 0.314548565 mirna_pc |
| 19891 hsa-mir-92b | PRCC         | 0.342146309 mirna_pc |
| 19892 hsa-mir-92b | SET          | 0.331019331 mirna_pc |
| 19893 hsa-mir-92b | SLC2A11      | 0.309545699 mirna_pc |
| 19894 hsa-mir-92b | TYW3         | 0.419825486 mirna_pc |
| 19895 hsa-mir-92b | LAPTM4B      | 0.355542376 mirna_pc |
| 19896 hsa-mir-92b | PPAT         | 0.343146354 mirna_pc |
| 19897 hsa-mir-92b | DHX9         | 0.373075534 mirna_pc |
| 19898 hsa-mir-92b | CCDC138      | 0.325609781 mirna_pc |
| 19899 hsa-mir-92b | LOC100128191 | 0.300584881 mirna_pc |
| 19900 hsa-mir-92b | SFRS1        | 0.309194846 mirna_pc |
| 19901 hsa-mir-92b | TEX10        | 0.315600672 mirna_pc |
| 19902 hsa-mir-92b | SKP2         | 0.338647884 mirna_pc |
| 19903 hsa-mir-92b | GAD1         | 0.336946008 mirna_pc |
| 19904 hsa-mir-92b | C4orf46      | 0.33626448 mirna_pc  |
| 19905 hsa-mir-92b | MAZ          | 0.37998844 mirna_pc  |
| 19906 hsa-mir-92b | SSRP1        | 0.345710621 mirna_pc |
| 19907 hsa-mir-92b | POLR2D       | 0.337364764 mirna_pc |
| 19908 hsa-mir-92b | KHDRBS1      | 0.337743627 mirna_pc |
| 19909 hsa-mir-92b | TUB          | 0.306138297 mirna_pc |
| 19910 hsa-mir-92b | LOC92659     | 0.342475215 mirna_pc |
| 19911 hsa-mir-92b | TOMM34       | 0.406580819 mirna_pc |
| 19912 hsa-mir-92b | MTL 5.00     | 0.417853565 mirna_pc |
| 19913 hsa-mir-92b | MAPRE1       | 0.315495785 mirna_pc |
| 19914 hsa-mir-92b | C16orf93     | 0.35048613 mirna_pc  |
| 19915 hsa-mir-92b | FIGN         | 0.45079348 mirna_pc  |
| 19916 hsa-mir-92b | PARP1        | 0.378554419 mirna_pc |
| 19917 hsa-mir-92b | SNRNP40      | 0.324218658 mirna_pc |
| 19918 hsa-mir-92b | SLC39A10     | 0.449102754 mirna_pc |
| 19919 hsa-mir-92b | SUV420H2     | 0.310206207 mirna_pc |
| 19920 hsa-mir-92b | NOLC1        | 0.329521984 mirna_pc |
| 19921 hsa-mir-92b | METTL1       | 0.305097413 mirna_pc |
| 19922 hsa-mir-92b | LIN9         | 0.355803086 mirna_pc |
| 19923 hsa-mir-92b | QSOX2        | 0.304712489 mirna_pc |
| 19924 hsa-mir-92b | EXOSC2       | 0.335848645 mirna_pc |
| 19925 hsa-mir-92b | SCARB1       | 0.30981264 mirna_pc  |

|                   |           |                      |
|-------------------|-----------|----------------------|
| 19926 hsa-mir-92b | C11orf84  | 0.389623828 mirna_pc |
| 19927 hsa-mir-92b | TBCE      | 0.377524832 mirna_pc |
| 19928 hsa-mir-92b | SUV39H2   | 0.312034372 mirna_pc |
| 19929 hsa-mir-92b | HOXA9     | 0.34248595 mirna_pc  |
| 19930 hsa-mir-92b | LSM 2.00  | 0.390441982 mirna_pc |
| 19931 hsa-mir-92b | GORAB     | 0.333451894 mirna_pc |
| 19932 hsa-mir-92b | DPY30     | 0.341528867 mirna_pc |
| 19933 hsa-mir-92b | SFRS3     | 0.335342724 mirna_pc |
| 19934 hsa-mir-92b | SHOX2     | 0.376126913 mirna_pc |
| 19935 hsa-mir-92b | SCAMP3    | 0.423738353 mirna_pc |
| 19936 hsa-mir-92b | CCT4      | 0.31941724 mirna_pc  |
| 19937 hsa-mir-92b | ELAVL1    | 0.394684514 mirna_pc |
| 19938 hsa-mir-92b | HABP4     | 0.413383489 mirna_pc |
| 19939 hsa-mir-92b | NAE1      | 0.371433985 mirna_pc |
| 19940 hsa-mir-92b | PAK1IP1   | 0.335570373 mirna_pc |
| 19941 hsa-mir-92b | TWISTNB   | 0.344513011 mirna_pc |
| 19942 hsa-mir-92b | ILF3      | 0.303280218 mirna_pc |
| 19943 hsa-mir-92b | EHMT2     | 0.393628388 mirna_pc |
| 19944 hsa-mir-92b | C1orf85   | 0.30174558 mirna_pc  |
| 19945 hsa-mir-92b | UBAP2L    | 0.360762673 mirna_pc |
| 19946 hsa-mir-92b | TOR3A     | 0.313889044 mirna_pc |
| 19947 hsa-mir-92b | RPGRIPI1L | 0.377063264 mirna_pc |
| 19948 hsa-mir-92b | GTF2H4    | 0.411751254 mirna_pc |
| 19949 hsa-mir-92b | HEATR2    | 0.410375676 mirna_pc |
| 19950 hsa-mir-92b | LSM 6.00  | 0.303634309 mirna_pc |
| 19951 hsa-mir-92b | PRAME     | 0.354516473 mirna_pc |
| 19952 hsa-mir-92b | AZI1      | 0.314281406 mirna_pc |
| 19953 hsa-mir-92b | C7orf27   | 0.338453651 mirna_pc |
| 19954 hsa-mir-92b | WRB       | 0.310756697 mirna_pc |
| 19955 hsa-mir-92b | IPO9      | 0.454205548 mirna_pc |
| 19956 hsa-mir-92b | C15orf23  | 0.355670818 mirna_pc |
| 19957 hsa-mir-92b | KDELC1    | 0.329306672 mirna_pc |
| 19958 hsa-mir-92b | SLM01     | 0.319675524 mirna_pc |
| 19959 hsa-mir-92b | PMS2L1    | 0.300774913 mirna_pc |
| 19960 hsa-mir-92b | ITGB3BP   | 0.379744635 mirna_pc |
| 19961 hsa-mir-92b | SPG21     | 0.403853685 mirna_pc |
| 19962 hsa-mir-92b | C16orf80  | 0.340119491 mirna_pc |
| 19963 hsa-mir-92b | TMEM223   | 0.324185219 mirna_pc |
| 19964 hsa-mir-92b | VPS72     | 0.383430996 mirna_pc |
| 19965 hsa-mir-92b | RCOR2     | 0.443113178 mirna_pc |
| 19966 hsa-mir-92b | FAM125B   | 0.306534627 mirna_pc |
| 19967 hsa-mir-92b | AS3MT     | 0.369445203 mirna_pc |
| 19968 hsa-mir-92b | HDAC2     | 0.36094552 mirna_pc  |
| 19969 hsa-mir-92b | CILP2     | 0.305626729 mirna_pc |
| 19970 hsa-mir-92b | HAUS1     | 0.322961681 mirna_pc |
| 19971 hsa-mir-92b | RRP12     | 0.351322882 mirna_pc |
| 19972 hsa-mir-92b | POGK      | 0.33212609 mirna_pc  |
| 19973 hsa-mir-92b | SLC39A1   | 0.350936673 mirna_pc |
| 19974 hsa-mir-92b | UBE2Q1    | 0.314364483 mirna_pc |
| 19975 hsa-mir-92b | KREMEN2   | 0.300400104 mirna_pc |
| 19976 hsa-mir-92b | NUDT3     | 0.343143099 mirna_pc |
| 19977 hsa-mir-92b | MEX3A     | 0.332909161 mirna_pc |
| 19978 hsa-mir-92b | BAT1      | 0.303423983 mirna_pc |
| 19979 hsa-mir-92b | CCDC74A   | 0.479863089 mirna_pc |

|                   |           |                      |
|-------------------|-----------|----------------------|
| 19980 hsa-mir-92b | TAF5      | 0.395923354 mirna_pc |
| 19981 hsa-mir-92b | PDIA3     | 0.314234581 mirna_pc |
| 19982 hsa-mir-92b | CCDC74B   | 0.463628986 mirna_pc |
| 19983 hsa-mir-92b | RFX5      | 0.338230376 mirna_pc |
| 19984 hsa-mir-92b | HIST3H2A  | 0.379662716 mirna_pc |
| 19985 hsa-mir-92b | TSEN34    | 0.32237396 mirna_pc  |
| 19986 hsa-mir-92b | MAD2L2    | 0.347087376 mirna_pc |
| 19987 hsa-mir-92b | HNRNPA1L2 | 0.324078405 mirna_pc |
| 19988 hsa-mir-92b | RCCD1     | 0.400330756 mirna_pc |
| 19989 hsa-mir-92b | ZBTB12    | 0.31976984 mirna_pc  |
| 19990 hsa-mir-92b | TADA1     | 0.326641798 mirna_pc |
| 19991 hsa-mir-92b | DUSP12    | 0.49583785 mirna_pc  |
| 19992 hsa-mir-92b | ARL 3.00  | 0.376937585 mirna_pc |
| 19993 hsa-mir-92b | H3F3A     | 0.33506738 mirna_pc  |
| 19994 hsa-mir-92b | PPIL6     | 0.363826955 mirna_pc |
| 19995 hsa-mir-92b | METTL13   | 0.479635904 mirna_pc |
| 19996 hsa-mir-92b | SEMA3D    | 0.430631516 mirna_pc |
| 19997 hsa-mir-92b | C13orf27  | 0.331812557 mirna_pc |
| 19998 hsa-mir-92b | RBMX      | 0.316702268 mirna_pc |
| 19999 hsa-mir-92b | SRP9      | 0.336438113 mirna_pc |
| 20000 hsa-mir-92b | DAP3      | 0.357389852 mirna_pc |
| 20001 hsa-mir-92b | QPCTL     | 0.334128407 mirna_pc |
| 20002 hsa-mir-92b | PDIA3P    | 0.32163743 mirna_pc  |
| 20003 hsa-mir-92b | MDC 1.00  | 0.325285491 mirna_pc |
| 20004 hsa-mir-92b | OXTR      | 0.312235141 mirna_pc |
| 20005 hsa-mir-92b | CLK2      | 0.348372394 mirna_pc |
| 20006 hsa-mir-92b | ACD       | 0.367407201 mirna_pc |
| 20007 hsa-mir-92b | GPN3      | 0.323195176 mirna_pc |
| 20008 hsa-mir-92b | MRPL37    | 0.308838088 mirna_pc |
| 20009 hsa-mir-92b | LOC440905 | 0.30146346 mirna_pc  |
| 20010 hsa-mir-92b | NAA40     | 0.307202512 mirna_pc |
| 20011 hsa-mir-92b | GPATCH2   | 0.348449754 mirna_pc |
| 20012 hsa-mir-92b | NAT14     | 0.301544451 mirna_pc |
| 20013 hsa-mir-92b | PCGF6     | 0.384515735 mirna_pc |
| 20014 hsa-mir-92b | WDR90     | 0.300340987 mirna_pc |
| 20015 hsa-mir-92b | CNPY2     | 0.345108832 mirna_pc |
| 20016 hsa-mir-92b | APOA1BP   | 0.314005286 mirna_pc |
| 20017 hsa-mir-92b | CASC2     | 0.30319838 mirna_pc  |
| 20018 hsa-mir-92b | PYG02     | 0.352851622 mirna_pc |
| 20019 hsa-mir-92b | B3GAT3    | 0.340636168 mirna_pc |
| 20020 hsa-mir-92b | FAM92A1   | 0.316157285 mirna_pc |
| 20021 hsa-mir-92b | C12orf76  | 0.312827612 mirna_pc |
| 20022 hsa-mir-92b | FAM189B   | 0.370051384 mirna_pc |
| 20023 hsa-mir-92b | LRPPRC    | 0.313914279 mirna_pc |
| 20024 hsa-mir-92b | POTEF     | 0.333489292 mirna_pc |
| 20025 hsa-mir-92b | NUP133    | 0.332112665 mirna_pc |
| 20026 hsa-mir-92b | LOC645676 | 0.327850287 mirna_pc |
| 20027 hsa-mir-92b | BCL7A     | 0.329295338 mirna_pc |
| 20028 hsa-mir-92b | WNT10A    | 0.30091019 mirna_pc  |
| 20029 hsa-mir-92b | AP3M1     | 0.310009192 mirna_pc |
| 20030 hsa-mir-92b | MTX1      | 0.339019676 mirna_pc |
| 20031 hsa-mir-92b | TRPA1     | 0.364317688 mirna_pc |
| 20032 hsa-mir-92b | WDR70     | 0.332066134 mirna_pc |
| 20033 hsa-mir-92b | RGS16     | 0.361803699 mirna_pc |

|                   |          |                      |
|-------------------|----------|----------------------|
| 20034 hsa-mir-92b | KCNC3    | 0.302259119 mirna_pc |
| 20035 hsa-mir-92b | SETDB1   | 0.328066182 mirna_pc |
| 20036 hsa-mir-92b | CHST10   | 0.374548125 mirna_pc |
| 20037 hsa-mir-92b | ARF1     | 0.320315098 mirna_pc |
| 20038 hsa-mir-92b | CUEDC2   | 0.328742815 mirna_pc |
| 20039 hsa-mir-92b | PRR3     | 0.388643219 mirna_pc |
| 20040 hsa-mir-92b | TMEM106C | 0.313304545 mirna_pc |
| 20041 hsa-mir-92b | RAB28    | 0.380848122 mirna_pc |
| 20042 hsa-mir-92b | TAF4B    | 0.371389597 mirna_pc |
| 20043 hsa-mir-92b | CDK20    | 0.309180892 mirna_pc |
| 20044 hsa-mir-92b | RAD1     | 0.350254481 mirna_pc |
| 20045 hsa-mir-92b | UBFD1    | 0.304541701 mirna_pc |
| 20046 hsa-mir-92b | GANAB    | 0.360088843 mirna_pc |
| 20047 hsa-mir-92b | GBAP1    | 0.303707272 mirna_pc |
| 20048 hsa-mir-92b | TMEM67   | 0.331068113 mirna_pc |
| 20049 hsa-mir-92b | SEC61A2  | 0.413795499 mirna_pc |
| 20050 hsa-mir-92b | PSPC1    | 0.345122414 mirna_pc |
| 20051 hsa-mir-92b | COPZ1    | 0.359355792 mirna_pc |
| 20052 hsa-mir-92b | GPR3     | 0.462984725 mirna_pc |
| 20053 hsa-mir-92b | B4GALT3  | 0.548660184 mirna_pc |
| 20054 hsa-mir-92b | UROS     | 0.304229011 mirna_pc |
| 20055 hsa-mir-92b | COQ10A   | 0.339098053 mirna_pc |
| 20056 hsa-mir-92b | SCLY     | 0.404678646 mirna_pc |
| 20057 hsa-mir-92b | GPR125   | 0.321655119 mirna_pc |
| 20058 hsa-mir-92b | CTU2     | 0.313008766 mirna_pc |
| 20059 hsa-mir-92b | NF2      | 0.303676596 mirna_pc |
| 20060 hsa-mir-92b | GSTCD    | 0.316876989 mirna_pc |
| 20061 hsa-mir-92b | MYBL1    | 0.336287874 mirna_pc |
| 20062 hsa-mir-92b | DHX57    | 0.333366067 mirna_pc |
| 20063 hsa-mir-92b | UBQLN4   | 0.380109414 mirna_pc |
| 20064 hsa-mir-92b | CHST14   | 0.303650782 mirna_pc |
| 20065 hsa-mir-92b | TMEM107  | 0.330720528 mirna_pc |
| 20066 hsa-mir-92b | SFT2D3   | 0.406461712 mirna_pc |
| 20067 hsa-mir-92b | TMEFF1   | 0.407827406 mirna_pc |
| 20068 hsa-mir-92b | AKR7A2   | 0.316182865 mirna_pc |
| 20069 hsa-mir-92b | SFRS7    | 0.348165953 mirna_pc |
| 20070 hsa-mir-92b | C18orf10 | 0.326680451 mirna_pc |
| 20071 hsa-mir-92b | PFAS     | 0.431697642 mirna_pc |
| 20072 hsa-mir-92b | PAIP1    | 0.374619198 mirna_pc |
| 20073 hsa-mir-92b | C10orf35 | 0.319083995 mirna_pc |
| 20074 hsa-mir-92b | DNM3     | 0.422838993 mirna_pc |
| 20075 hsa-mir-92b | LRRC45   | 0.30768265 mirna_pc  |
| 20076 hsa-mir-92b | CDCA7L   | 0.346922271 mirna_pc |
| 20077 hsa-mir-92b | WDR78    | 0.304788261 mirna_pc |
| 20078 hsa-mir-92b | IFT81    | 0.424024733 mirna_pc |
| 20079 hsa-mir-92b | ZNF184   | 0.315647649 mirna_pc |
| 20080 hsa-mir-92b | NIPSNAP1 | 0.426960614 mirna_pc |
| 20081 hsa-mir-92b | C8orf37  | 0.415481746 mirna_pc |
| 20082 hsa-mir-92b | C2orf77  | 0.336056748 mirna_pc |
| 20083 hsa-mir-92b | SPA17    | 0.420084759 mirna_pc |
| 20084 hsa-mir-92b | LRP4     | 0.321293936 mirna_pc |
| 20085 hsa-mir-92b | SFI1     | 0.302561423 mirna_pc |
| 20086 hsa-mir-92b | ZBTB10   | 0.340487158 mirna_pc |
| 20087 hsa-mir-92b | TIMM17A  | 0.361498681 mirna_pc |



|                   |           |                      |
|-------------------|-----------|----------------------|
| 20088 hsa-mir-92b | ZNF771    | 0.398099843 mirna_pc |
| 20089 hsa-mir-92b | EEF1E1    | 0.33454105 mirna_pc  |
| 20090 hsa-mir-92b | PRUNE     | 0.333762648 mirna_pc |
| 20091 hsa-mir-92b | TCTN2     | 0.436483495 mirna_pc |
| 20092 hsa-mir-92b | NPHP1     | 0.351883929 mirna_pc |
| 20093 hsa-mir-92b | ANGPT1    | 0.424882239 mirna_pc |
| 20094 hsa-mir-92b | EXTL2     | 0.365115922 mirna_pc |
| 20095 hsa-mir-92b | LOC440173 | 0.322611793 mirna_pc |
| 20096 hsa-mir-92b | SEPHS1    | 0.381812886 mirna_pc |
| 20097 hsa-mir-92b | SHISA2    | 0.321013566 mirna_pc |
| 20098 hsa-mir-92b | TMEM183A  | 0.389575202 mirna_pc |
| 20099 hsa-mir-92b | TMEM9     | 0.462441802 mirna_pc |
| 20100 hsa-mir-92b | AGBL5     | 0.316644861 mirna_pc |
| 20101 hsa-mir-92b | ISYNA1    | 0.310214866 mirna_pc |
| 20102 hsa-mir-92b | MYL6B     | 0.305001283 mirna_pc |
| 20103 hsa-mir-92b | LOC338758 | 0.367972242 mirna_pc |
| 20104 hsa-mir-92b | PIPSL     | 0.412090442 mirna_pc |
| 20105 hsa-mir-92b | RNF138    | 0.315022549 mirna_pc |
| 20106 hsa-mir-92b | CD200     | 0.308963644 mirna_pc |
| 20107 hsa-mir-92b | GPR137C   | 0.32347273 mirna_pc  |
| 20108 hsa-mir-92b | BRD3      | 0.357221744 mirna_pc |
| 20109 hsa-mir-92b | TMEM14C   | 0.383379012 mirna_pc |
| 20110 hsa-mir-92b | NME4      | 0.327341029 mirna_pc |
| 20111 hsa-mir-92b | LYRM4     | 0.370696796 mirna_pc |
| 20112 hsa-mir-92b | PIP5K1A   | 0.435113278 mirna_pc |
| 20113 hsa-mir-92b | C9orf116  | 0.373662753 mirna_pc |
| 20114 hsa-mir-92b | GRB14     | 0.390271205 mirna_pc |
| 20115 hsa-mir-92b | CCDC113   | 0.400779893 mirna_pc |
| 20116 hsa-mir-92b | CHD1L     | 0.384947293 mirna_pc |
| 20117 hsa-mir-92b | C11orf49  | 0.357147035 mirna_pc |
| 20118 hsa-mir-92b | USP21     | 0.521184642 mirna_pc |
| 20119 hsa-mir-92b | DPCD      | 0.446587407 mirna_pc |
| 20120 hsa-mir-92b | KLHL12    | 0.349713099 mirna_pc |
| 20121 hsa-mir-92b | RNF5      | 0.33738051 mirna_pc  |
| 20122 hsa-mir-92b | ANP32A    | 0.401762246 mirna_pc |
| 20123 hsa-mir-92b | OSGEPL1   | 0.355838649 mirna_pc |
| 20124 hsa-mir-92b | E2F5      | 0.326714043 mirna_pc |
| 20125 hsa-mir-92b | SUPV3L1   | 0.338077859 mirna_pc |
| 20126 hsa-mir-92b | LMAN2L    | 0.305382028 mirna_pc |
| 20127 hsa-mir-92b | FAM104B   | 0.301992154 mirna_pc |
| 20128 hsa-mir-92b | C17orf81  | 0.367483236 mirna_pc |
| 20129 hsa-mir-92b | HNRNPH3   | 0.36000539 mirna_pc  |
| 20130 hsa-mir-92b | B4GALT6   | 0.314974267 mirna_pc |
| 20131 hsa-mir-92b | NSL1      | 0.349058641 mirna_pc |
| 20132 hsa-mir-92b | CNIH2     | 0.533771883 mirna_pc |
| 20133 hsa-mir-92b | BCCIP     | 0.326824694 mirna_pc |
| 20134 hsa-mir-92b | IQQC      | 0.309981737 mirna_pc |
| 20135 hsa-mir-92b | DDX19A    | 0.349463263 mirna_pc |
| 20136 hsa-mir-92b | EID3      | 0.401610768 mirna_pc |
| 20137 hsa-mir-92b | MORN2     | 0.367325571 mirna_pc |
| 20138 hsa-mir-92b | GATS      | 0.300492562 mirna_pc |
| 20139 hsa-mir-92b | MLLT11    | 0.400144445 mirna_pc |
| 20140 hsa-mir-92b | TRUB1     | 0.312953633 mirna_pc |
| 20141 hsa-mir-92b | PSTK      | 0.314711497 mirna_pc |

|                   |                |                      |
|-------------------|----------------|----------------------|
| 20142 hsa-mir-92b | C2orf15        | 0.343613326 mirna_pc |
| 20143 hsa-mir-92b | C12orf24       | 0.509551618 mirna_pc |
| 20144 hsa-mir-92b | SBK1           | 0.366566485 mirna_pc |
| 20145 hsa-mir-92b | NFYB           | 0.322096186 mirna_pc |
| 20146 hsa-mir-92b | NCRNA00094     | 0.40453076 mirna_pc  |
| 20147 hsa-mir-92b | SEMA3A         | 0.347297019 mirna_pc |
| 20148 hsa-mir-92b | THNSL1         | 0.357231562 mirna_pc |
| 20149 hsa-mir-92b | USP13          | 0.423398738 mirna_pc |
| 20150 hsa-mir-92b | UFC1           | 0.30437452 mirna_pc  |
| 20151 hsa-mir-92b | CP110          | 0.306388734 mirna_pc |
| 20152 hsa-mir-92b | NGFRAP1        | 0.301032575 mirna_pc |
| 20153 hsa-mir-92b | MSI1           | 0.305117293 mirna_pc |
| 20154 hsa-mir-92b | IFT74          | 0.373852463 mirna_pc |
| 20155 hsa-mir-92b | NR5A2          | 0.333428242 mirna_pc |
| 20156 hsa-mir-92b | C16orf48       | 0.416544253 mirna_pc |
| 20157 hsa-mir-92b | FGD1           | 0.331454573 mirna_pc |
| 20158 hsa-mir-92b | MDM1           | 0.394746522 mirna_pc |
| 20159 hsa-mir-92b | C10orf88       | 0.359393411 mirna_pc |
| 20160 hsa-mir-92b | TRO            | 0.371310003 mirna_pc |
| 20161 hsa-mir-92b | PACRGL         | 0.362064694 mirna_pc |
| 20162 hsa-mir-92b | PBX2           | 0.34604053 mirna_pc  |
| 20163 hsa-mir-92b | RAB36          | 0.380814535 mirna_pc |
| 20164 hsa-mir-92b | SLITRK6        | 0.383750429 mirna_pc |
| 20165 hsa-mir-92b | ZNF232         | 0.32943229 mirna_pc  |
| 20166 hsa-mir-92b | LYSMD1         | 0.3258525 mirna_pc   |
| 20167 hsa-mir-92b | METTL10        | 0.382581217 mirna_pc |
| 20168 hsa-mir-92b | HAPLN1         | 0.402513857 mirna_pc |
| 20169 hsa-mir-92b | RAC3           | 0.359097554 mirna_pc |
| 20170 hsa-mir-92b | C1orf43        | 0.30162074 mirna_pc  |
| 20171 hsa-mir-92b | PPOX           | 0.414639506 mirna_pc |
| 20172 hsa-mir-92b | RBBP4          | 0.42373122 mirna_pc  |
| 20173 hsa-mir-92b | LOC221710      | 0.34257399 mirna_pc  |
| 20174 hsa-mir-92b | DKFZP686I15217 | 0.325021148 mirna_pc |
| 20175 hsa-mir-92b | BRSK1          | 0.357092321 mirna_pc |
| 20176 hsa-mir-92b | IQCE           | 0.325475949 mirna_pc |
| 20177 hsa-mir-92b | CRYZ           | 0.469123733 mirna_pc |
| 20178 hsa-mir-92b | SPIN2B         | 0.316716543 mirna_pc |
| 20179 hsa-mir-92b | LRDD           | 0.302523643 mirna_pc |
| 20180 hsa-mir-92b | PDGFA          | 0.360696746 mirna_pc |
| 20181 hsa-mir-92b | KDELC2         | 0.302286662 mirna_pc |
| 20182 hsa-mir-92b | C20orf96       | 0.309247624 mirna_pc |
| 20183 hsa-mir-92b | TCTN3          | 0.409151945 mirna_pc |
| 20184 hsa-mir-92b | HSF2           | 0.324688097 mirna_pc |
| 20185 hsa-mir-92b | RRP15          | 0.356947111 mirna_pc |
| 20186 hsa-mir-92b | ETV5           | 0.35715857 mirna_pc  |
| 20187 hsa-mir-92b | NUCKS1         | 0.329286612 mirna_pc |
| 20188 hsa-mir-92b | TCTN1          | 0.418325811 mirna_pc |
| 20189 hsa-mir-92b | CHID1          | 0.312860439 mirna_pc |
| 20190 hsa-mir-92b | EXOSC6         | 0.317986067 mirna_pc |
| 20191 hsa-mir-92b | CTXN1          | 0.570255805 mirna_pc |
| 20192 hsa-mir-92b | B4GALNT4       | 0.363865737 mirna_pc |
| 20193 hsa-mir-92b | PRMT6          | 0.311353824 mirna_pc |
| 20194 hsa-mir-92b | BAI2           | 0.42269189 mirna_pc  |
| 20195 hsa-mir-92b | LNP1           | 0.342718822 mirna_pc |

|                    |           |                      |
|--------------------|-----------|----------------------|
| 20196 hsa-mir-92b  | PRDX3     | 0.368368609 mirna_pc |
| 20197 hsa-mir-92b  | TMEM14B   | 0.41828582 mirna_pc  |
| 20198 hsa-mir-92b  | DYNC2LI1  | 0.340531574 mirna_pc |
| 20199 hsa-mir-92b  | RBBP7     | 0.304228861 mirna_pc |
| 20200 hsa-mir-92b  | NT5M      | 0.352887841 mirna_pc |
| 20201 hsa-mir-92b  | LCA5      | 0.408902278 mirna_pc |
| 20202 hsa-mir-92b  | CDC73     | 0.328224084 mirna_pc |
| 20203 hsa-mir-92b  | DNMT3A    | 0.301277865 mirna_pc |
| 20204 hsa-mir-92b  | WDSUB1    | 0.314314764 mirna_pc |
| 20205 hsa-mir-92b  | TET1      | 0.317872372 mirna_pc |
| 20206 hsa-mir-92b  | APOO      | 0.301869268 mirna_pc |
| 20207 hsa-mir-92b  | C12orf73  | 0.322034177 mirna_pc |
| 20208 hsa-mir-92b  | DDX59     | 0.308587952 mirna_pc |
| 20209 hsa-mir-92b  | PRAF2     | 0.306043307 mirna_pc |
| 20210 hsa-mir-92b  | TMEM231   | 0.608532109 mirna_pc |
| 20211 hsa-mir-4326 | TPX2      | 0.317409637 mirna_pc |
| 20212 hsa-mir-4326 | KIF4B     | 0.300766708 mirna_pc |
| 20213 hsa-mir-4326 | UBE2C     | 0.353775733 mirna_pc |
| 20214 hsa-mir-4326 | BUB1      | 0.329686606 mirna_pc |
| 20215 hsa-mir-4326 | ASPM      | 0.325156574 mirna_pc |
| 20216 hsa-mir-4326 | FAM72A    | 0.375315869 mirna_pc |
| 20217 hsa-mir-4326 | FANCA     | 0.340445579 mirna_pc |
| 20218 hsa-mir-4326 | NCAPG     | 0.317342095 mirna_pc |
| 20219 hsa-mir-4326 | CLSPN     | 0.324870773 mirna_pc |
| 20220 hsa-mir-4326 | SGOL1     | 0.445137403 mirna_pc |
| 20221 hsa-mir-4326 | ARHGAP11A | 0.315902972 mirna_pc |
| 20222 hsa-mir-4326 | CBX3      | 0.328720185 mirna_pc |
| 20223 hsa-mir-4326 | IQGAP3    | 0.308609832 mirna_pc |
| 20224 hsa-mir-4326 | NEK2      | 0.330911479 mirna_pc |
| 20225 hsa-mir-4326 | KIF23     | 0.303481537 mirna_pc |
| 20226 hsa-mir-4326 | TROAP     | 0.345805877 mirna_pc |
| 20227 hsa-mir-4326 | XP01      | 0.375629225 mirna_pc |
| 20228 hsa-mir-4326 | CDCA2     | 0.317334765 mirna_pc |
| 20229 hsa-mir-4326 | DKC1      | 0.341051229 mirna_pc |
| 20230 hsa-mir-4326 | KIF4A     | 0.354871621 mirna_pc |
| 20231 hsa-mir-4326 | CENPI     | 0.302593028 mirna_pc |
| 20232 hsa-mir-4326 | NUF2      | 0.356819562 mirna_pc |
| 20233 hsa-mir-4326 | FANCB     | 0.324417662 mirna_pc |
| 20234 hsa-mir-4326 | HJURP     | 0.300649176 mirna_pc |
| 20235 hsa-mir-4326 | OIP5      | 0.352869695 mirna_pc |
| 20236 hsa-mir-4326 | RECQL4    | 0.33036031 mirna_pc  |
| 20237 hsa-mir-4326 | AURKA     | 0.501408223 mirna_pc |
| 20238 hsa-mir-4326 | SGOL2     | 0.301406541 mirna_pc |
| 20239 hsa-mir-4326 | CHEK2     | 0.329638082 mirna_pc |
| 20240 hsa-mir-4326 | KIF15     | 0.377764239 mirna_pc |
| 20241 hsa-mir-4326 | C1orf112  | 0.382582809 mirna_pc |
| 20242 hsa-mir-4326 | FAM72D    | 0.382819389 mirna_pc |
| 20243 hsa-mir-4326 | FAM72B    | 0.380938521 mirna_pc |
| 20244 hsa-mir-4326 | C12orf48  | 0.345814912 mirna_pc |
| 20245 hsa-mir-4326 | TTK       | 0.313727319 mirna_pc |
| 20246 hsa-mir-4326 | C6orf167  | 0.308257514 mirna_pc |
| 20247 hsa-mir-4326 | HNRNPA2B1 | 0.303744426 mirna_pc |
| 20248 hsa-mir-4326 | C20orf20  | 0.327567552 mirna_pc |
| 20249 hsa-mir-4326 | KIAA1524  | 0.306160075 mirna_pc |

|       |              |          |             |          |
|-------|--------------|----------|-------------|----------|
| 20250 | hsa-mir-4326 | KIF20B   | 0.339368976 | mirna_pc |
| 20251 | hsa-mir-4326 | ATAD2    | 0.304086637 | mirna_pc |
| 20252 | hsa-mir-4326 | C1orf135 | 0.369142023 | mirna_pc |
| 20253 | hsa-mir-4326 | ANP32E   | 0.38973346  | mirna_pc |
| 20254 | hsa-mir-4326 | CENPL    | 0.37976649  | mirna_pc |
| 20255 | hsa-mir-4326 | DNA2     | 0.315058415 | mirna_pc |
| 20256 | hsa-mir-4326 | DSN1     | 0.30642539  | mirna_pc |
| 20257 | hsa-mir-4326 | CSE1L    | 0.322141234 | mirna_pc |
| 20258 | hsa-mir-4326 | TPM3     | 0.30161436  | mirna_pc |
| 20259 | hsa-mir-4326 | HNRNPR   | 0.324840862 | mirna_pc |
| 20260 | hsa-mir-4326 | MSH2     | 0.348730628 | mirna_pc |
| 20261 | hsa-mir-4326 | DBF4     | 0.310996191 | mirna_pc |
| 20262 | hsa-mir-4326 | EIF2AK1  | 0.326116582 | mirna_pc |
| 20263 | hsa-mir-4326 | SSB      | 0.375554434 | mirna_pc |
| 20264 | hsa-mir-4326 | FBX05    | 0.322352937 | mirna_pc |
| 20265 | hsa-mir-4326 | E2F3     | 0.320061307 | mirna_pc |
| 20266 | hsa-mir-4326 | CDC25A   | 0.303311298 | mirna_pc |
| 20267 | hsa-mir-4326 | RAD54B   | 0.373288943 | mirna_pc |
| 20268 | hsa-mir-4326 | C21orf45 | 0.305799205 | mirna_pc |
| 20269 | hsa-mir-4326 | C5orf34  | 0.381337    | mirna_pc |
| 20270 | hsa-mir-4326 | NCL      | 0.310258972 | mirna_pc |
| 20271 | hsa-mir-4326 | SRRT     | 0.310194955 | mirna_pc |
| 20272 | hsa-mir-4326 | SASS6    | 0.382914948 | mirna_pc |
| 20273 | hsa-mir-4326 | PNPT1    | 0.324104245 | mirna_pc |
| 20274 | hsa-mir-4326 | CASP8    | 0.327941094 | mirna_pc |
| 20275 | hsa-mir-4326 | CCDC18   | 0.4034447   | mirna_pc |
| 20276 | hsa-mir-4326 | DNAJC2   | 0.347378915 | mirna_pc |
| 20277 | hsa-mir-4326 | INTS8    | 0.366076722 | mirna_pc |
| 20278 | hsa-mir-4326 | SUV420H2 | 0.327993596 | mirna_pc |
| 20279 | hsa-mir-4326 | ZNF695   | 0.334532356 | mirna_pc |
| 20280 | hsa-mir-4326 | LIN9     | 0.327822043 | mirna_pc |
| 20281 | hsa-mir-4326 | POLR1B   | 0.340929409 | mirna_pc |
| 20282 | hsa-mir-4326 | ACTR2    | 0.384826641 | mirna_pc |
| 20283 | hsa-mir-4326 | HSP90B1  | 0.406746559 | mirna_pc |
| 20284 | hsa-mir-4326 | YTHDF1   | 0.344965077 | mirna_pc |
| 20285 | hsa-mir-4326 | ATP13A3  | 0.334396434 | mirna_pc |
| 20286 | hsa-mir-4326 | NAA25    | 0.317745203 | mirna_pc |
| 20287 | hsa-mir-4326 | MAGOHB   | 0.385978863 | mirna_pc |
| 20288 | hsa-mir-4326 | DEK      | 0.32486707  | mirna_pc |
| 20289 | hsa-mir-4326 | PLOD3    | 0.30652341  | mirna_pc |
| 20290 | hsa-mir-4326 | TAF4     | 0.434044598 | mirna_pc |
| 20291 | hsa-mir-4326 | AMPD2    | 0.30116432  | mirna_pc |
| 20292 | hsa-mir-4326 | RPN2     | 0.355763925 | mirna_pc |
| 20293 | hsa-mir-4326 | BAT2L2   | 0.338610279 | mirna_pc |
| 20294 | hsa-mir-4326 | TDG      | 0.352661782 | mirna_pc |
| 20295 | hsa-mir-4326 | HSPA14   | 0.322711038 | mirna_pc |
| 20296 | hsa-mir-4326 | UCKL1    | 0.336185328 | mirna_pc |
| 20297 | hsa-mir-4326 | DDX55    | 0.310076946 | mirna_pc |
| 20298 | hsa-mir-4326 | CDK5RAP1 | 0.334763988 | mirna_pc |
| 20299 | hsa-mir-4326 | CNOT3    | 0.300815803 | mirna_pc |
| 20300 | hsa-mir-4326 | SMC3     | 0.340897843 | mirna_pc |
| 20301 | hsa-mir-4326 | BAT1     | 0.320685355 | mirna_pc |
| 20302 | hsa-mir-4326 | USP1     | 0.325387479 | mirna_pc |
| 20303 | hsa-mir-4326 | TMEM68   | 0.318759133 | mirna_pc |

|                    |           |                      |
|--------------------|-----------|----------------------|
| 20304 hsa-mir-4326 | FARSB     | 0.314688062 mirna_pc |
| 20305 hsa-mir-4326 | MTF2      | 0.330526486 mirna_pc |
| 20306 hsa-mir-4326 | FGFR10P   | 0.349365743 mirna_pc |
| 20307 hsa-mir-4326 | METTL13   | 0.31647456 mirna_pc  |
| 20308 hsa-mir-4326 | DDOST     | 0.369504336 mirna_pc |
| 20309 hsa-mir-4326 | ATAD3B    | 0.348112972 mirna_pc |
| 20310 hsa-mir-4326 | ZNF137    | 0.311990382 mirna_pc |
| 20311 hsa-mir-4326 | PDIA6     | 0.314822518 mirna_pc |
| 20312 hsa-mir-4326 | LOC440905 | 0.321739599 mirna_pc |
| 20313 hsa-mir-4326 | LTV1      | 0.331543486 mirna_pc |
| 20314 hsa-mir-4326 | MTPAP     | 0.301670368 mirna_pc |
| 20315 hsa-mir-4326 | ZNF701    | 0.315528389 mirna_pc |
| 20316 hsa-mir-4326 | ARFGAP1   | 0.390940678 mirna_pc |
| 20317 hsa-mir-4326 | ISPD      | 0.326534949 mirna_pc |
| 20318 hsa-mir-4326 | KCNC3     | 0.357490191 mirna_pc |
| 20319 hsa-mir-4326 | MORF4L2   | 0.320571556 mirna_pc |
| 20320 hsa-mir-4326 | KCNQ10T1  | 0.411726555 mirna_pc |
| 20321 hsa-mir-4326 | NKAP      | 0.301488005 mirna_pc |
| 20322 hsa-mir-4326 | UPF3B     | 0.349788925 mirna_pc |
| 20323 hsa-mir-4326 | MGC72080  | 0.306232152 mirna_pc |
| 20324 hsa-mir-4326 | TBX3      | 0.304511111 mirna_pc |
| 20325 hsa-mir-4326 | SLC25A13  | 0.382748128 mirna_pc |
| 20326 hsa-mir-4326 | TOP 1.00  | 0.306535899 mirna_pc |
| 20327 hsa-mir-4326 | SEC61A2   | 0.303040161 mirna_pc |
| 20328 hsa-mir-4326 | SSX2IP    | 0.32322523 mirna_pc  |
| 20329 hsa-mir-4326 | KDELRL2   | 0.442931805 mirna_pc |
| 20330 hsa-mir-4326 | SFRS13A   | 0.32837721 mirna_pc  |
| 20331 hsa-mir-4326 | C5orf28   | 0.406691312 mirna_pc |
| 20332 hsa-mir-4326 | SS18L2    | 0.390155645 mirna_pc |
| 20333 hsa-mir-4326 | MYBL1     | 0.303655179 mirna_pc |
| 20334 hsa-mir-4326 | MTIF2     | 0.326028387 mirna_pc |
| 20335 hsa-mir-4326 | FAM35B2   | 0.354851767 mirna_pc |
| 20336 hsa-mir-4326 | TCTE3     | 0.363293246 mirna_pc |
| 20337 hsa-mir-4326 | DPH3B     | 0.302524482 mirna_pc |
| 20338 hsa-mir-4326 | THOC1     | 0.337137432 mirna_pc |
| 20339 hsa-mir-4326 | MRPL42    | 0.312270036 mirna_pc |
| 20340 hsa-mir-4326 | C7orf36   | 0.32077335 mirna_pc  |
| 20341 hsa-mir-4326 | AXIN2     | 0.310388391 mirna_pc |
| 20342 hsa-mir-4326 | CCAR1     | 0.379218398 mirna_pc |
| 20343 hsa-mir-4326 | FAM122C   | 0.317256117 mirna_pc |
| 20344 hsa-mir-4326 | FAM35B    | 0.30108747 mirna_pc  |
| 20345 hsa-mir-4326 | EEF1E1    | 0.324485071 mirna_pc |
| 20346 hsa-mir-4326 | PRPF4B    | 0.302222291 mirna_pc |
| 20347 hsa-mir-4326 | ZNF525    | 0.306246609 mirna_pc |
| 20348 hsa-mir-4326 | YIPF4     | 0.321295281 mirna_pc |
| 20349 hsa-mir-4326 | TSPAN13   | 0.351135074 mirna_pc |
| 20350 hsa-mir-4326 | C6orf211  | 0.506265491 mirna_pc |
| 20351 hsa-mir-4326 | NUP43     | 0.35545682 mirna_pc  |
| 20352 hsa-mir-4326 | COPA      | 0.3665361 mirna_pc   |
| 20353 hsa-mir-4326 | SNRNP48   | 0.301867419 mirna_pc |
| 20354 hsa-mir-4326 | FAM98B    | 0.355114123 mirna_pc |
| 20355 hsa-mir-4326 | LRFN1     | 0.316124653 mirna_pc |
| 20356 hsa-mir-4326 | PRPF38B   | 0.307699068 mirna_pc |
| 20357 hsa-mir-4326 | C6orf182  | 0.336896141 mirna_pc |

|       |              |           |             |          |
|-------|--------------|-----------|-------------|----------|
| 20358 | hsa-mir-4326 | TRUB1     | 0.321807758 | mirna_pc |
| 20359 | hsa-mir-4326 | RGPD1     | 0.32242172  | mirna_pc |
| 20360 | hsa-mir-4326 | LCA5L     | 0.329051166 | mirna_pc |
| 20361 | hsa-mir-4326 | SEMA3A    | 0.314901306 | mirna_pc |
| 20362 | hsa-mir-4326 | COPB1     | 0.364949919 | mirna_pc |
| 20363 | hsa-mir-4326 | RTN4IP1   | 0.314791424 | mirna_pc |
| 20364 | hsa-mir-4326 | HS2ST1    | 0.332954762 | mirna_pc |
| 20365 | hsa-mir-4326 | C10orf88  | 0.339234931 | mirna_pc |
| 20366 | hsa-mir-4326 | LOC727896 | 0.320716767 | mirna_pc |
| 20367 | hsa-mir-4326 | BMI1      | 0.423684829 | mirna_pc |
| 20368 | hsa-mir-4326 | FANCF     | 0.316095977 | mirna_pc |
| 20369 | hsa-mir-4326 | XYLB      | 0.328698086 | mirna_pc |
| 20370 | hsa-mir-4326 | RBBP6     | 0.30268956  | mirna_pc |
| 20371 | hsa-mir-4326 | MRPL19    | 0.332110568 | mirna_pc |
| 20372 | hsa-mir-4326 | PGM3      | 0.305934118 | mirna_pc |
| 20373 | hsa-mir-4326 | GLB1      | 0.305801972 | mirna_pc |
| 20374 | hsa-mir-4326 | DDX1      | 0.373965278 | mirna_pc |
| 20375 | hsa-mir-4326 | C21orf125 | 0.388957515 | mirna_pc |
| 20376 | hsa-mir-4326 | C6orf62   | 0.304741606 | mirna_pc |
| 20377 | hsa-mir-4326 | TMED2     | 0.319308981 | mirna_pc |
| 20378 | hsa-mir-4326 | GPR89A    | 0.311796129 | mirna_pc |
| 20379 | hsa-mir-4326 | ZNF765    | 0.360584937 | mirna_pc |
| 20380 | hsa-mir-4326 | PPIL4     | 0.319578952 | mirna_pc |
| 20381 | hsa-mir-4326 | HRSP12    | 0.325853865 | mirna_pc |
| 20382 | hsa-mir-4326 | PHIP      | 0.302423893 | mirna_pc |
| 20383 | hsa-mir-4326 | MAPK8     | 0.347046126 | mirna_pc |
| 20384 | hsa-mir-4326 | SLC2A3    | 0.301120388 | mirna_pc |
| 20385 | hsa-mir-4326 | SS18L1    | 0.325796674 | mirna_pc |
| 20386 | hsa-mir-1248 | HOXC8     | 0.358142103 | mirna_pc |
| 20387 | hsa-mir-1248 | SEMA3E    | 0.622382141 | mirna_pc |
| 20388 | hsa-mir-1248 | EEF1A2    | 0.376980785 | mirna_pc |
| 20389 | hsa-mir-1248 | XP01      | 0.302387472 | mirna_pc |
| 20390 | hsa-mir-1248 | MYST4     | 0.346742882 | mirna_pc |
| 20391 | hsa-mir-1248 | YPEL1     | 0.333696245 | mirna_pc |
| 20392 | hsa-mir-1248 | CITED2    | 0.549212755 | mirna_pc |
| 20393 | hsa-mir-1248 | NR2F2     | 0.522829613 | mirna_pc |
| 20394 | hsa-mir-1248 | HIST1H2AE | 0.303878947 | mirna_pc |
| 20395 | hsa-mir-1248 | ZNF10     | 0.305814469 | mirna_pc |
| 20396 | hsa-mir-1248 | MSH2      | 0.331782365 | mirna_pc |
| 20397 | hsa-mir-1248 | CDC7      | 0.390104322 | mirna_pc |
| 20398 | hsa-mir-1248 | POLI      | 0.411580942 | mirna_pc |
| 20399 | hsa-mir-1248 | SMC2      | 0.492101563 | mirna_pc |
| 20400 | hsa-mir-1248 | ZNF367    | 0.470858203 | mirna_pc |
| 20401 | hsa-mir-1248 | USP25     | 0.391179045 | mirna_pc |
| 20402 | hsa-mir-1248 | LOC375190 | 0.427038882 | mirna_pc |
| 20403 | hsa-mir-1248 | CRY1      | 0.40217198  | mirna_pc |
| 20404 | hsa-mir-1248 | HIST1H3D  | 0.433083597 | mirna_pc |
| 20405 | hsa-mir-1248 | SLC2A11   | 0.402850114 | mirna_pc |
| 20406 | hsa-mir-1248 | ZNF433    | 0.377995546 | mirna_pc |
| 20407 | hsa-mir-1248 | TYW3      | 0.551582911 | mirna_pc |
| 20408 | hsa-mir-1248 | ACAD10    | 0.372529313 | mirna_pc |
| 20409 | hsa-mir-1248 | TEX10     | 0.349205084 | mirna_pc |
| 20410 | hsa-mir-1248 | GAD1      | 0.373263632 | mirna_pc |
| 20411 | hsa-mir-1248 | OXR1      | 0.320385273 | mirna_pc |

|       |              |           |             |          |
|-------|--------------|-----------|-------------|----------|
| 20412 | hsa-mir-1248 | FIGN      | 0.628583479 | mirna_pc |
| 20413 | hsa-mir-1248 | CCDC18    | 0.319975707 | mirna_pc |
| 20414 | hsa-mir-1248 | PRRT1     | 0.32463768  | mirna_pc |
| 20415 | hsa-mir-1248 | SAMD11    | 0.355594403 | mirna_pc |
| 20416 | hsa-mir-1248 | PHF10     | 0.37972789  | mirna_pc |
| 20417 | hsa-mir-1248 | CAPS2     | 0.506075062 | mirna_pc |
| 20418 | hsa-mir-1248 | PBX3      | 0.371977746 | mirna_pc |
| 20419 | hsa-mir-1248 | CCDC121   | 0.336698233 | mirna_pc |
| 20420 | hsa-mir-1248 | HABP4     | 0.589684503 | mirna_pc |
| 20421 | hsa-mir-1248 | TBCEL     | 0.306744416 | mirna_pc |
| 20422 | hsa-mir-1248 | C20orf160 | 0.32270474  | mirna_pc |
| 20423 | hsa-mir-1248 | RNF2      | 0.307522213 | mirna_pc |
| 20424 | hsa-mir-1248 | SFRS18    | 0.316309898 | mirna_pc |
| 20425 | hsa-mir-1248 | CCNE2     | 0.338567199 | mirna_pc |
| 20426 | hsa-mir-1248 | CTSL2     | 0.513757968 | mirna_pc |
| 20427 | hsa-mir-1248 | PTGER4    | 0.337466255 | mirna_pc |
| 20428 | hsa-mir-1248 | PRAME     | 0.313886763 | mirna_pc |
| 20429 | hsa-mir-1248 | HNRNPK    | 0.331273219 | mirna_pc |
| 20430 | hsa-mir-1248 | KIAA0776  | 0.383146177 | mirna_pc |
| 20431 | hsa-mir-1248 | CA11      | 0.320821406 | mirna_pc |
| 20432 | hsa-mir-1248 | TTC33     | 0.394553419 | mirna_pc |
| 20433 | hsa-mir-1248 | CTNNAL1   | 0.338648611 | mirna_pc |
| 20434 | hsa-mir-1248 | TDG       | 0.450523473 | mirna_pc |
| 20435 | hsa-mir-1248 | EIF4ENIF1 | 0.33430356  | mirna_pc |
| 20436 | hsa-mir-1248 | BAIAP3    | 0.315665331 | mirna_pc |
| 20437 | hsa-mir-1248 | RAD23B    | 0.351690976 | mirna_pc |
| 20438 | hsa-mir-1248 | TUG1      | 0.373749288 | mirna_pc |
| 20439 | hsa-mir-1248 | ODF2L     | 0.335262305 | mirna_pc |
| 20440 | hsa-mir-1248 | AMN1      | 0.43093494  | mirna_pc |
| 20441 | hsa-mir-1248 | FAM184A   | 0.39614544  | mirna_pc |
| 20442 | hsa-mir-1248 | TDRD5     | 0.358785632 | mirna_pc |
| 20443 | hsa-mir-1248 | CILP2     | 0.379444646 | mirna_pc |
| 20444 | hsa-mir-1248 | GRAMD1C   | 0.413564372 | mirna_pc |
| 20445 | hsa-mir-1248 | PCM1      | 0.427732443 | mirna_pc |
| 20446 | hsa-mir-1248 | ZNF217    | 0.43563385  | mirna_pc |
| 20447 | hsa-mir-1248 | OTUD6B    | 0.422607203 | mirna_pc |
| 20448 | hsa-mir-1248 | LPHN2     | 0.382256839 | mirna_pc |
| 20449 | hsa-mir-1248 | HIST1H4H  | 0.307863387 | mirna_pc |
| 20450 | hsa-mir-1248 | BARD1     | 0.390135592 | mirna_pc |
| 20451 | hsa-mir-1248 | ZNF131    | 0.397287211 | mirna_pc |
| 20452 | hsa-mir-1248 | CNTNAP3   | 0.340827661 | mirna_pc |
| 20453 | hsa-mir-1248 | USP1      | 0.484326036 | mirna_pc |
| 20454 | hsa-mir-1248 | C16orf87  | 0.306752598 | mirna_pc |
| 20455 | hsa-mir-1248 | SCG2      | 0.314900046 | mirna_pc |
| 20456 | hsa-mir-1248 | EDIL3     | 0.435640599 | mirna_pc |
| 20457 | hsa-mir-1248 | ZNF608    | 0.334502807 | mirna_pc |
| 20458 | hsa-mir-1248 | SEMA3D    | 0.646550864 | mirna_pc |
| 20459 | hsa-mir-1248 | HACE1     | 0.357646112 | mirna_pc |
| 20460 | hsa-mir-1248 | ZNF451    | 0.315570692 | mirna_pc |
| 20461 | hsa-mir-1248 | CTDSPL2   | 0.345134888 | mirna_pc |
| 20462 | hsa-mir-1248 | HSPH1     | 0.362672622 | mirna_pc |
| 20463 | hsa-mir-1248 | SLC25A30  | 0.501564763 | mirna_pc |
| 20464 | hsa-mir-1248 | PPP3R1    | 0.348579415 | mirna_pc |
| 20465 | hsa-mir-1248 | ZNF658    | 0.311513687 | mirna_pc |

|                    |           |                      |
|--------------------|-----------|----------------------|
| 20466 hsa-mir-1248 | ERCC4     | 0.344781289 mirna_pc |
| 20467 hsa-mir-1248 | GATA3     | 0.345831024 mirna_pc |
| 20468 hsa-mir-1248 | KSR2      | 0.3626368 mirna_pc   |
| 20469 hsa-mir-1248 | CCDC41    | 0.368692524 mirna_pc |
| 20470 hsa-mir-1248 | LOC162632 | 0.372138309 mirna_pc |
| 20471 hsa-mir-1248 | NOL8      | 0.301268722 mirna_pc |
| 20472 hsa-mir-1248 | OXTR      | 0.375690863 mirna_pc |
| 20473 hsa-mir-1248 | CHORDC1   | 0.352644226 mirna_pc |
| 20474 hsa-mir-1248 | THSD7A    | 0.502553084 mirna_pc |
| 20475 hsa-mir-1248 | PPM1J     | 0.321239313 mirna_pc |
| 20476 hsa-mir-1248 | RPE       | 0.312714161 mirna_pc |
| 20477 hsa-mir-1248 | ZNF605    | 0.390910579 mirna_pc |
| 20478 hsa-mir-1248 | PSIP1     | 0.317913061 mirna_pc |
| 20479 hsa-mir-1248 | PCGF6     | 0.316745741 mirna_pc |
| 20480 hsa-mir-1248 | ZBTB43    | 0.301839252 mirna_pc |
| 20481 hsa-mir-1248 | TTC32     | 0.307459566 mirna_pc |
| 20482 hsa-mir-1248 | DPY19L4   | 0.312115196 mirna_pc |
| 20483 hsa-mir-1248 | OSR2      | 0.390378074 mirna_pc |
| 20484 hsa-mir-1248 | C12orf76  | 0.368740109 mirna_pc |
| 20485 hsa-mir-1248 | C6orf170  | 0.427154133 mirna_pc |
| 20486 hsa-mir-1248 | SENP6     | 0.373852839 mirna_pc |
| 20487 hsa-mir-1248 | HIST1H2BC | 0.488294691 mirna_pc |
| 20488 hsa-mir-1248 | VPS37A    | 0.345568418 mirna_pc |
| 20489 hsa-mir-1248 | CRISPLD1  | 0.321691205 mirna_pc |
| 20490 hsa-mir-1248 | RGS16     | 0.357924281 mirna_pc |
| 20491 hsa-mir-1248 | KCNC3     | 0.408763801 mirna_pc |
| 20492 hsa-mir-1248 | ZFYVE16   | 0.384226203 mirna_pc |
| 20493 hsa-mir-1248 | RASSF8    | 0.308981097 mirna_pc |
| 20494 hsa-mir-1248 | PIK3C3    | 0.341667606 mirna_pc |
| 20495 hsa-mir-1248 | PHTF2     | 0.352093888 mirna_pc |
| 20496 hsa-mir-1248 | NBN       | 0.308052262 mirna_pc |
| 20497 hsa-mir-1248 | ZNF84     | 0.374834646 mirna_pc |
| 20498 hsa-mir-1248 | TAF4B     | 0.323271224 mirna_pc |
| 20499 hsa-mir-1248 | RMI1      | 0.36370385 mirna_pc  |
| 20500 hsa-mir-1248 | ZDHHHC17  | 0.333113804 mirna_pc |
| 20501 hsa-mir-1248 | TMEM67    | 0.393062478 mirna_pc |
| 20502 hsa-mir-1248 | ZBTB34    | 0.326855065 mirna_pc |
| 20503 hsa-mir-1248 | ZNF782    | 0.382526355 mirna_pc |
| 20504 hsa-mir-1248 | SEC61A2   | 0.352406487 mirna_pc |
| 20505 hsa-mir-1248 | HIST2H2BE | 0.370118032 mirna_pc |
| 20506 hsa-mir-1248 | SFRS13A   | 0.30993823 mirna_pc  |
| 20507 hsa-mir-1248 | C5orf28   | 0.332928998 mirna_pc |
| 20508 hsa-mir-1248 | NF2       | 0.358152321 mirna_pc |
| 20509 hsa-mir-1248 | MYSM1     | 0.309230939 mirna_pc |
| 20510 hsa-mir-1248 | ASB7      | 0.36514074 mirna_pc  |
| 20511 hsa-mir-1248 | ATP6V1C1  | 0.314353534 mirna_pc |
| 20512 hsa-mir-1248 | MYBL1     | 0.52926215 mirna_pc  |
| 20513 hsa-mir-1248 | PAPOLA    | 0.326134409 mirna_pc |
| 20514 hsa-mir-1248 | GAS1      | 0.447239392 mirna_pc |
| 20515 hsa-mir-1248 | PTPDC1    | 0.344579575 mirna_pc |
| 20516 hsa-mir-1248 | EFNA5     | 0.47746475 mirna_pc  |
| 20517 hsa-mir-1248 | MRPL42    | 0.324089482 mirna_pc |
| 20518 hsa-mir-1248 | SUDS3     | 0.304048965 mirna_pc |
| 20519 hsa-mir-1248 | TMEM136   | 0.325410112 mirna_pc |



|                    |           |                      |
|--------------------|-----------|----------------------|
| 20520 hsa-mir-1248 | PAIP1     | 0.346196609 mirna_pc |
| 20521 hsa-mir-1248 | CCDC78    | 0.420450108 mirna_pc |
| 20522 hsa-mir-1248 | DNM3      | 0.587350438 mirna_pc |
| 20523 hsa-mir-1248 | KIAA1033  | 0.344498811 mirna_pc |
| 20524 hsa-mir-1248 | SEMA3C    | 0.342745617 mirna_pc |
| 20525 hsa-mir-1248 | WDR78     | 0.462616283 mirna_pc |
| 20526 hsa-mir-1248 | LOC153684 | 0.309234851 mirna_pc |
| 20527 hsa-mir-1248 | IFT81     | 0.303376719 mirna_pc |
| 20528 hsa-mir-1248 | ZNF184    | 0.425051871 mirna_pc |
| 20529 hsa-mir-1248 | MBLAC2    | 0.300833361 mirna_pc |
| 20530 hsa-mir-1248 | ATXN2     | 0.310469477 mirna_pc |
| 20531 hsa-mir-1248 | NIPSNAP1  | 0.355851478 mirna_pc |
| 20532 hsa-mir-1248 | FAM76B    | 0.302577891 mirna_pc |
| 20533 hsa-mir-1248 | C8orf37   | 0.565315979 mirna_pc |
| 20534 hsa-mir-1248 | PDGFC     | 0.583536542 mirna_pc |
| 20535 hsa-mir-1248 | CNOT7     | 0.344918401 mirna_pc |
| 20536 hsa-mir-1248 | SFI1      | 0.412398277 mirna_pc |
| 20537 hsa-mir-1248 | MAP3K12   | 0.413850298 mirna_pc |
| 20538 hsa-mir-1248 | MAP2      | 0.314592914 mirna_pc |
| 20539 hsa-mir-1248 | ZBTB10    | 0.475579755 mirna_pc |
| 20540 hsa-mir-1248 | TTC21B    | 0.360038238 mirna_pc |
| 20541 hsa-mir-1248 | SPIN1     | 0.370000483 mirna_pc |
| 20542 hsa-mir-1248 | CASP8AP2  | 0.326452293 mirna_pc |
| 20543 hsa-mir-1248 | ANGPT1    | 0.621601563 mirna_pc |
| 20544 hsa-mir-1248 | PRPF4B    | 0.309806762 mirna_pc |
| 20545 hsa-mir-1248 | EXTL2     | 0.316975099 mirna_pc |
| 20546 hsa-mir-1248 | ZNF525    | 0.343439702 mirna_pc |
| 20547 hsa-mir-1248 | TASP1     | 0.305945655 mirna_pc |
| 20548 hsa-mir-1248 | LOC338758 | 0.427733068 mirna_pc |
| 20549 hsa-mir-1248 | KIF27     | 0.377285674 mirna_pc |
| 20550 hsa-mir-1248 | ATG4C     | 0.306434447 mirna_pc |
| 20551 hsa-mir-1248 | ZNF638    | 0.312689524 mirna_pc |
| 20552 hsa-mir-1248 | GPR137C   | 0.365505807 mirna_pc |
| 20553 hsa-mir-1248 | CEP110    | 0.3677926 mirna_pc   |
| 20554 hsa-mir-1248 | PIP5K1A   | 0.350392094 mirna_pc |
| 20555 hsa-mir-1248 | TMX3      | 0.371367965 mirna_pc |
| 20556 hsa-mir-1248 | RB1CC1    | 0.306131692 mirna_pc |
| 20557 hsa-mir-1248 | GRB14     | 0.430038506 mirna_pc |
| 20558 hsa-mir-1248 | HTR7P1    | 0.420296519 mirna_pc |
| 20559 hsa-mir-1248 | EMB       | 0.323668829 mirna_pc |
| 20560 hsa-mir-1248 | KIAA0528  | 0.367463349 mirna_pc |
| 20561 hsa-mir-1248 | ETAA1     | 0.325009643 mirna_pc |
| 20562 hsa-mir-1248 | HERC4     | 0.35439513 mirna_pc  |
| 20563 hsa-mir-1248 | BCLAF1    | 0.343281536 mirna_pc |
| 20564 hsa-mir-1248 | C14orf135 | 0.321065366 mirna_pc |
| 20565 hsa-mir-1248 | B4GALT6   | 0.391119813 mirna_pc |
| 20566 hsa-mir-1248 | TMEM167A  | 0.302347222 mirna_pc |
| 20567 hsa-mir-1248 | CEP290    | 0.389489472 mirna_pc |
| 20568 hsa-mir-1248 | CNIH2     | 0.367478859 mirna_pc |
| 20569 hsa-mir-1248 | EID3      | 0.569501212 mirna_pc |
| 20570 hsa-mir-1248 | KIAA1467  | 0.410869185 mirna_pc |
| 20571 hsa-mir-1248 | UBE2W     | 0.455230605 mirna_pc |
| 20572 hsa-mir-1248 | ETNK1     | 0.308121768 mirna_pc |
| 20573 hsa-mir-1248 | GATS      | 0.393424495 mirna_pc |

|                    |           |                      |
|--------------------|-----------|----------------------|
| 20574 hsa-mir-1248 | TRUB1     | 0.368975259 mirna_pc |
| 20575 hsa-mir-1248 | HIST1H3E  | 0.329114833 mirna_pc |
| 20576 hsa-mir-1248 | PLAC2     | 0.461213787 mirna_pc |
| 20577 hsa-mir-1248 | SNX16     | 0.344602898 mirna_pc |
| 20578 hsa-mir-1248 | HIST4H4   | 0.380034978 mirna_pc |
| 20579 hsa-mir-1248 | C12orf24  | 0.476467062 mirna_pc |
| 20580 hsa-mir-1248 | ZNF484    | 0.303570892 mirna_pc |
| 20581 hsa-mir-1248 | GLS2      | 0.311384912 mirna_pc |
| 20582 hsa-mir-1248 | SEMA3A    | 0.623850039 mirna_pc |
| 20583 hsa-mir-1248 | USP13     | 0.341790894 mirna_pc |
| 20584 hsa-mir-1248 | ESF1      | 0.386084215 mirna_pc |
| 20585 hsa-mir-1248 | MIB1      | 0.309972304 mirna_pc |
| 20586 hsa-mir-1248 | ZNF26     | 0.342688836 mirna_pc |
| 20587 hsa-mir-1248 | SS18      | 0.314980068 mirna_pc |
| 20588 hsa-mir-1248 | ZNF391    | 0.375639031 mirna_pc |
| 20589 hsa-mir-1248 | ZBTB41    | 0.378353574 mirna_pc |
| 20590 hsa-mir-1248 | IFT74     | 0.49139768 mirna_pc  |
| 20591 hsa-mir-1248 | NR5A2     | 0.351604026 mirna_pc |
| 20592 hsa-mir-1248 | ZZZ3      | 0.316470703 mirna_pc |
| 20593 hsa-mir-1248 | MDM1      | 0.598562784 mirna_pc |
| 20594 hsa-mir-1248 | C10orf88  | 0.334229319 mirna_pc |
| 20595 hsa-mir-1248 | MCOLN3    | 0.329229744 mirna_pc |
| 20596 hsa-mir-1248 | C1orf52   | 0.317469727 mirna_pc |
| 20597 hsa-mir-1248 | BBS10     | 0.378767818 mirna_pc |
| 20598 hsa-mir-1248 | SLITRK6   | 0.663389046 mirna_pc |
| 20599 hsa-mir-1248 | ERGIC2    | 0.486901937 mirna_pc |
| 20600 hsa-mir-1248 | PPTC7     | 0.321968134 mirna_pc |
| 20601 hsa-mir-1248 | ANKRD34A  | 0.343660063 mirna_pc |
| 20602 hsa-mir-1248 | HAPLN1    | 0.68909811 mirna_pc  |
| 20603 hsa-mir-1248 | C8orf45   | 0.318597983 mirna_pc |
| 20604 hsa-mir-1248 | HOOK1     | 0.344312562 mirna_pc |
| 20605 hsa-mir-1248 | HIATL2    | 0.338863651 mirna_pc |
| 20606 hsa-mir-1248 | LOC221710 | 0.409418305 mirna_pc |
| 20607 hsa-mir-1248 | KIAA1586  | 0.307903695 mirna_pc |
| 20608 hsa-mir-1248 | TSGA10    | 0.386008981 mirna_pc |
| 20609 hsa-mir-1248 | CRYZ      | 0.514877757 mirna_pc |
| 20610 hsa-mir-1248 | ZNF664    | 0.359813238 mirna_pc |
| 20611 hsa-mir-1248 | TMEM106B  | 0.330668331 mirna_pc |
| 20612 hsa-mir-1248 | SMEK2     | 0.421940188 mirna_pc |
| 20613 hsa-mir-1248 | TBX1      | 0.308593206 mirna_pc |
| 20614 hsa-mir-1248 | KDELC2    | 0.343825088 mirna_pc |
| 20615 hsa-mir-1248 | C20orf96  | 0.326176722 mirna_pc |
| 20616 hsa-mir-1248 | SLC4A7    | 0.320729569 mirna_pc |
| 20617 hsa-mir-1248 | PRICKLE1  | 0.36688737 mirna_pc  |
| 20618 hsa-mir-1248 | GRINL1A   | 0.316524449 mirna_pc |
| 20619 hsa-mir-1248 | PHF3      | 0.307181268 mirna_pc |
| 20620 hsa-mir-1248 | ZNF644    | 0.329428104 mirna_pc |
| 20621 hsa-mir-1248 | RSRC2     | 0.386739365 mirna_pc |
| 20622 hsa-mir-1248 | KLHL24    | 0.31035026 mirna_pc  |
| 20623 hsa-mir-1248 | CTXN1     | 0.42983885 mirna_pc  |
| 20624 hsa-mir-1248 | ZNF883    | 0.312806997 mirna_pc |
| 20625 hsa-mir-1248 | RBM27     | 0.30311948 mirna_pc  |
| 20626 hsa-mir-1248 | ZNF680    | 0.415180755 mirna_pc |
| 20627 hsa-mir-1248 | C9orf21   | 0.38156336 mirna_pc  |

|       |              |           |             |          |
|-------|--------------|-----------|-------------|----------|
| 20628 | hsa-mir-1248 | LOC283070 | 0.43064282  | mirna_pc |
| 20629 | hsa-mir-1248 | CCDC117   | 0.416275593 | mirna_pc |
| 20630 | hsa-mir-1248 | FAM178A   | 0.330444833 | mirna_pc |
| 20631 | hsa-mir-1248 | C10orf46  | 0.315900075 | mirna_pc |
| 20632 | hsa-mir-1248 | SLC11A2   | 0.457233046 | mirna_pc |
| 20633 | hsa-mir-1248 | BAI2      | 0.304877067 | mirna_pc |
| 20634 | hsa-mir-1248 | HEY2      | 0.386222895 | mirna_pc |
| 20635 | hsa-mir-1248 | ZFP37     | 0.454455398 | mirna_pc |
| 20636 | hsa-mir-1248 | PHIP      | 0.372771188 | mirna_pc |
| 20637 | hsa-mir-1248 | CAMK1D    | 0.302511512 | mirna_pc |
| 20638 | hsa-mir-1248 | LCA5      | 0.5974896   | mirna_pc |
| 20639 | hsa-mir-1248 | CDC73     | 0.382496413 | mirna_pc |
| 20640 | hsa-mir-1248 | SLC2A3    | 0.452706954 | mirna_pc |
| 20641 | hsa-mir-1248 | KIAA1107  | 0.339349172 | mirna_pc |
| 20642 | hsa-mir-1248 | BRAP      | 0.310625439 | mirna_pc |
| 20643 | hsa-mir-1248 | ZNF326    | 0.33347824  | mirna_pc |
| 20644 | hsa-mir-1248 | ZRANB2    | 0.323901713 | mirna_pc |
| 20645 | hsa-mir-1248 | CCDC88A   | 0.306206516 | mirna_pc |
| 20646 | hsa-mir-1248 | AGTPBP1   | 0.31159869  | mirna_pc |
| 20647 | hsa-mir-1248 | SS18L1    | 0.326076581 | mirna_pc |
| 20648 | hsa-mir-454  | TPX2      | 0.308626152 | mirna_pc |
| 20649 | hsa-mir-454  | ECT2      | 0.322030679 | mirna_pc |
| 20650 | hsa-mir-454  | RRM2      | 0.384539766 | mirna_pc |
| 20651 | hsa-mir-454  | CDK1      | 0.335066614 | mirna_pc |
| 20652 | hsa-mir-454  | CDC25C    | 0.371228536 | mirna_pc |
| 20653 | hsa-mir-454  | UBE2C     | 0.348239744 | mirna_pc |
| 20654 | hsa-mir-454  | NUSAP1    | 0.313226502 | mirna_pc |
| 20655 | hsa-mir-454  | KIF18B    | 0.356834113 | mirna_pc |
| 20656 | hsa-mir-454  | ASPM      | 0.310613617 | mirna_pc |
| 20657 | hsa-mir-454  | FANCA     | 0.339049644 | mirna_pc |
| 20658 | hsa-mir-454  | NCAPG     | 0.37263321  | mirna_pc |
| 20659 | hsa-mir-454  | CLSPN     | 0.411422429 | mirna_pc |
| 20660 | hsa-mir-454  | SGOL1     | 0.350101491 | mirna_pc |
| 20661 | hsa-mir-454  | ARHGAP11A | 0.312532069 | mirna_pc |
| 20662 | hsa-mir-454  | CBX3      | 0.306254976 | mirna_pc |
| 20663 | hsa-mir-454  | SPC25     | 0.310991563 | mirna_pc |
| 20664 | hsa-mir-454  | FANCI     | 0.335690154 | mirna_pc |
| 20665 | hsa-mir-454  | NCAPH     | 0.301570164 | mirna_pc |
| 20666 | hsa-mir-454  | GTSE1     | 0.394868688 | mirna_pc |
| 20667 | hsa-mir-454  | KIF23     | 0.325707516 | mirna_pc |
| 20668 | hsa-mir-454  | CENPA     | 0.348482323 | mirna_pc |
| 20669 | hsa-mir-454  | MAD2L1    | 0.310115886 | mirna_pc |
| 20670 | hsa-mir-454  | TIMELESS  | 0.356464355 | mirna_pc |
| 20671 | hsa-mir-454  | LMNB1     | 0.365614745 | mirna_pc |
| 20672 | hsa-mir-454  | ASF1B     | 0.345691645 | mirna_pc |
| 20673 | hsa-mir-454  | CDCA8     | 0.303690463 | mirna_pc |
| 20674 | hsa-mir-454  | TROAP     | 0.366475916 | mirna_pc |
| 20675 | hsa-mir-454  | XP01      | 0.347696328 | mirna_pc |
| 20676 | hsa-mir-454  | TK1       | 0.32498295  | mirna_pc |
| 20677 | hsa-mir-454  | CDCA2     | 0.322235267 | mirna_pc |
| 20678 | hsa-mir-454  | DKC1      | 0.321315296 | mirna_pc |
| 20679 | hsa-mir-454  | KIAA0101  | 0.437979575 | mirna_pc |
| 20680 | hsa-mir-454  | KIF4A     | 0.351433725 | mirna_pc |
| 20681 | hsa-mir-454  | ORC1L     | 0.348002529 | mirna_pc |

|                   |           |                      |
|-------------------|-----------|----------------------|
| 20682 hsa-mir-454 | KNTC1     | 0.359296597 mirna_pc |
| 20683 hsa-mir-454 | CCNF      | 0.318328569 mirna_pc |
| 20684 hsa-mir-454 | CCNB2     | 0.300330784 mirna_pc |
| 20685 hsa-mir-454 | NUF2      | 0.479544769 mirna_pc |
| 20686 hsa-mir-454 | PLK4      | 0.39230365 mirna_pc  |
| 20687 hsa-mir-454 | KIF18A    | 0.370526451 mirna_pc |
| 20688 hsa-mir-454 | SKA3      | 0.300109115 mirna_pc |
| 20689 hsa-mir-454 | HJURP     | 0.373312987 mirna_pc |
| 20690 hsa-mir-454 | SKA1      | 0.376092224 mirna_pc |
| 20691 hsa-mir-454 | BLM       | 0.337204233 mirna_pc |
| 20692 hsa-mir-454 | DNMT1     | 0.361702119 mirna_pc |
| 20693 hsa-mir-454 | PAICS     | 0.305079473 mirna_pc |
| 20694 hsa-mir-454 | CCDC150   | 0.309221285 mirna_pc |
| 20695 hsa-mir-454 | BIRC5     | 0.356832035 mirna_pc |
| 20696 hsa-mir-454 | DTL       | 0.350981756 mirna_pc |
| 20697 hsa-mir-454 | EME1      | 0.357965333 mirna_pc |
| 20698 hsa-mir-454 | CENPK     | 0.483625185 mirna_pc |
| 20699 hsa-mir-454 | AURKB     | 0.356439058 mirna_pc |
| 20700 hsa-mir-454 | MCM10     | 0.350671349 mirna_pc |
| 20701 hsa-mir-454 | KIF20A    | 0.366501502 mirna_pc |
| 20702 hsa-mir-454 | SGOL2     | 0.342205016 mirna_pc |
| 20703 hsa-mir-454 | CENPE     | 0.322135933 mirna_pc |
| 20704 hsa-mir-454 | KIF15     | 0.39314364 mirna_pc  |
| 20705 hsa-mir-454 | CDCA3     | 0.366100465 mirna_pc |
| 20706 hsa-mir-454 | C1orf112  | 0.397107326 mirna_pc |
| 20707 hsa-mir-454 | GINS1     | 0.382776253 mirna_pc |
| 20708 hsa-mir-454 | TRAIP     | 0.348733696 mirna_pc |
| 20709 hsa-mir-454 | ORC6L     | 0.343634864 mirna_pc |
| 20710 hsa-mir-454 | C16orf59  | 0.338653675 mirna_pc |
| 20711 hsa-mir-454 | FAM72B    | 0.336900894 mirna_pc |
| 20712 hsa-mir-454 | NEIL3     | 0.324501371 mirna_pc |
| 20713 hsa-mir-454 | ACTL6A    | 0.336090783 mirna_pc |
| 20714 hsa-mir-454 | ZNF229    | 0.307217501 mirna_pc |
| 20715 hsa-mir-454 | C12orf48  | 0.43938469 mirna_pc  |
| 20716 hsa-mir-454 | HNRNPL    | 0.349421693 mirna_pc |
| 20717 hsa-mir-454 | SMC4      | 0.418807108 mirna_pc |
| 20718 hsa-mir-454 | HMMR      | 0.341762647 mirna_pc |
| 20719 hsa-mir-454 | TTK       | 0.307778917 mirna_pc |
| 20720 hsa-mir-454 | SF3B4     | 0.309858559 mirna_pc |
| 20721 hsa-mir-454 | HELLS     | 0.422301221 mirna_pc |
| 20722 hsa-mir-454 | ERCC6L    | 0.301045767 mirna_pc |
| 20723 hsa-mir-454 | POLE2     | 0.320832083 mirna_pc |
| 20724 hsa-mir-454 | NCAPD2    | 0.320175846 mirna_pc |
| 20725 hsa-mir-454 | C11orf82  | 0.315735181 mirna_pc |
| 20726 hsa-mir-454 | C6orf167  | 0.335491546 mirna_pc |
| 20727 hsa-mir-454 | BRCA1     | 0.324881587 mirna_pc |
| 20728 hsa-mir-454 | HNRNPA2B1 | 0.349509912 mirna_pc |
| 20729 hsa-mir-454 | MCM6      | 0.302052577 mirna_pc |
| 20730 hsa-mir-454 | EPRI      | 0.304651187 mirna_pc |
| 20731 hsa-mir-454 | BRIP1     | 0.405999497 mirna_pc |
| 20732 hsa-mir-454 | PIF1      | 0.32898168 mirna_pc  |
| 20733 hsa-mir-454 | SFRS2     | 0.300698179 mirna_pc |
| 20734 hsa-mir-454 | C15orf42  | 0.318122946 mirna_pc |
| 20735 hsa-mir-454 | FAM60A    | 0.317333019 mirna_pc |

|                   |           |                      |
|-------------------|-----------|----------------------|
| 20736 hsa-mir-454 | ATAD5     | 0.408405317 mirna_pc |
| 20737 hsa-mir-454 | KIF20B    | 0.311123024 mirna_pc |
| 20738 hsa-mir-454 | ESCO2     | 0.319761296 mirna_pc |
| 20739 hsa-mir-454 | ATAD2     | 0.346785337 mirna_pc |
| 20740 hsa-mir-454 | CHAF1A    | 0.336060839 mirna_pc |
| 20741 hsa-mir-454 | DEPDC1B   | 0.381960575 mirna_pc |
| 20742 hsa-mir-454 | GIN54     | 0.31600921 mirna_pc  |
| 20743 hsa-mir-454 | ANP32E    | 0.478324633 mirna_pc |
| 20744 hsa-mir-454 | CENPO     | 0.321875409 mirna_pc |
| 20745 hsa-mir-454 | XRCC2     | 0.350794482 mirna_pc |
| 20746 hsa-mir-454 | TRIM59    | 0.311746093 mirna_pc |
| 20747 hsa-mir-454 | CENPL     | 0.327246936 mirna_pc |
| 20748 hsa-mir-454 | GEN1      | 0.374383731 mirna_pc |
| 20749 hsa-mir-454 | HMGB2     | 0.44491488 mirna_pc  |
| 20750 hsa-mir-454 | DNA2      | 0.412061666 mirna_pc |
| 20751 hsa-mir-454 | DTYMK     | 0.314825921 mirna_pc |
| 20752 hsa-mir-454 | E2F7      | 0.35120139 mirna_pc  |
| 20753 hsa-mir-454 | RBL1      | 0.307673889 mirna_pc |
| 20754 hsa-mir-454 | CCDC99    | 0.348226643 mirna_pc |
| 20755 hsa-mir-454 | CDK2      | 0.371372836 mirna_pc |
| 20756 hsa-mir-454 | HNRNPR    | 0.306033776 mirna_pc |
| 20757 hsa-mir-454 | DLEU2     | 0.374635391 mirna_pc |
| 20758 hsa-mir-454 | PRIM1     | 0.375921514 mirna_pc |
| 20759 hsa-mir-454 | PSMC4     | 0.34550002 mirna_pc  |
| 20760 hsa-mir-454 | CHAF1B    | 0.300373653 mirna_pc |
| 20761 hsa-mir-454 | MSH2      | 0.394217946 mirna_pc |
| 20762 hsa-mir-454 | DBF4      | 0.424824294 mirna_pc |
| 20763 hsa-mir-454 | CDC7      | 0.369496689 mirna_pc |
| 20764 hsa-mir-454 | SSB       | 0.358551287 mirna_pc |
| 20765 hsa-mir-454 | NOL11     | 0.367627209 mirna_pc |
| 20766 hsa-mir-454 | PSMB4     | 0.312429649 mirna_pc |
| 20767 hsa-mir-454 | RFC4      | 0.336435565 mirna_pc |
| 20768 hsa-mir-454 | FBX05     | 0.438215889 mirna_pc |
| 20769 hsa-mir-454 | FIGNL1    | 0.454802298 mirna_pc |
| 20770 hsa-mir-454 | E2F3      | 0.382255576 mirna_pc |
| 20771 hsa-mir-454 | CDC25A    | 0.304509268 mirna_pc |
| 20772 hsa-mir-454 | RAD54B    | 0.326833381 mirna_pc |
| 20773 hsa-mir-454 | DDX12     | 0.390025121 mirna_pc |
| 20774 hsa-mir-454 | C13orf34  | 0.334669236 mirna_pc |
| 20775 hsa-mir-454 | MCM8      | 0.328136637 mirna_pc |
| 20776 hsa-mir-454 | CPSF3     | 0.358039134 mirna_pc |
| 20777 hsa-mir-454 | UTP6      | 0.315559978 mirna_pc |
| 20778 hsa-mir-454 | DNAJB11   | 0.388696856 mirna_pc |
| 20779 hsa-mir-454 | PUS7      | 0.312775406 mirna_pc |
| 20780 hsa-mir-454 | CBX8      | 0.332783745 mirna_pc |
| 20781 hsa-mir-454 | TMEM201   | 0.314527826 mirna_pc |
| 20782 hsa-mir-454 | NCL       | 0.307334321 mirna_pc |
| 20783 hsa-mir-454 | SRRT      | 0.353340386 mirna_pc |
| 20784 hsa-mir-454 | CACYBP    | 0.368486231 mirna_pc |
| 20785 hsa-mir-454 | SASS6     | 0.448518161 mirna_pc |
| 20786 hsa-mir-454 | PSRC1     | 0.307854964 mirna_pc |
| 20787 hsa-mir-454 | DBF4B     | 0.39367141 mirna_pc  |
| 20788 hsa-mir-454 | HNRNPM    | 0.353528827 mirna_pc |
| 20789 hsa-mir-454 | LSM 12.00 | 0.32224719 mirna_pc  |

|                   |              |                      |
|-------------------|--------------|----------------------|
| 20790 hsa-mir-454 | PNPT1        | 0.306320384 mirna_pc |
| 20791 hsa-mir-454 | TMPO         | 0.407289653 mirna_pc |
| 20792 hsa-mir-454 | POLR2H       | 0.306540926 mirna_pc |
| 20793 hsa-mir-454 | GPR19        | 0.378133608 mirna_pc |
| 20794 hsa-mir-454 | LSG1         | 0.302867672 mirna_pc |
| 20795 hsa-mir-454 | GABPB1       | 0.406138958 mirna_pc |
| 20796 hsa-mir-454 | CCDC138      | 0.347702023 mirna_pc |
| 20797 hsa-mir-454 | LOC100128191 | 0.362941953 mirna_pc |
| 20798 hsa-mir-454 | HMG2         | 0.365683501 mirna_pc |
| 20799 hsa-mir-454 | SUMO2        | 0.327177944 mirna_pc |
| 20800 hsa-mir-454 | SFRS1        | 0.423207561 mirna_pc |
| 20801 hsa-mir-454 | TIPIN        | 0.33243421 mirna_pc  |
| 20802 hsa-mir-454 | C4orf46      | 0.324958847 mirna_pc |
| 20803 hsa-mir-454 | RFC5         | 0.330324991 mirna_pc |
| 20804 hsa-mir-454 | HSPD1        | 0.332930246 mirna_pc |
| 20805 hsa-mir-454 | FTSJ2        | 0.322340859 mirna_pc |
| 20806 hsa-mir-454 | KHDRBS1      | 0.407621997 mirna_pc |
| 20807 hsa-mir-454 | HSP90AA1     | 0.303673252 mirna_pc |
| 20808 hsa-mir-454 | CCDC18       | 0.422323872 mirna_pc |
| 20809 hsa-mir-454 | DNAJC2       | 0.341841455 mirna_pc |
| 20810 hsa-mir-454 | C4orf21      | 0.306204257 mirna_pc |
| 20811 hsa-mir-454 | TMEM194A     | 0.365572794 mirna_pc |
| 20812 hsa-mir-454 | TTC26        | 0.310062601 mirna_pc |
| 20813 hsa-mir-454 | HAUS6        | 0.315218746 mirna_pc |
| 20814 hsa-mir-454 | HNRNPU       | 0.413986773 mirna_pc |
| 20815 hsa-mir-454 | NASP         | 0.371418055 mirna_pc |
| 20816 hsa-mir-454 | PTMA         | 0.41058076 mirna_pc  |
| 20817 hsa-mir-454 | NCBP2        | 0.31781885 mirna_pc  |
| 20818 hsa-mir-454 | SUV39H2      | 0.347825889 mirna_pc |
| 20819 hsa-mir-454 | FANCL        | 0.327462563 mirna_pc |
| 20820 hsa-mir-454 | HNRNPD       | 0.302336051 mirna_pc |
| 20821 hsa-mir-454 | POP1         | 0.318869925 mirna_pc |
| 20822 hsa-mir-454 | POC5         | 0.358910307 mirna_pc |
| 20823 hsa-mir-454 | HSP90B1      | 0.417481602 mirna_pc |
| 20824 hsa-mir-454 | PSMC3IP      | 0.344441452 mirna_pc |
| 20825 hsa-mir-454 | ATP13A3      | 0.45353126 mirna_pc  |
| 20826 hsa-mir-454 | DHFR         | 0.432726952 mirna_pc |
| 20827 hsa-mir-454 | DEK          | 0.395709523 mirna_pc |
| 20828 hsa-mir-454 | PASK         | 0.3561148 mirna_pc   |
| 20829 hsa-mir-454 | SKA2         | 0.363535528 mirna_pc |
| 20830 hsa-mir-454 | TGS1         | 0.328419259 mirna_pc |
| 20831 hsa-mir-454 | KHSRP        | 0.309215529 mirna_pc |
| 20832 hsa-mir-454 | C14orf145    | 0.300034285 mirna_pc |
| 20833 hsa-mir-454 | FUBP1        | 0.353087398 mirna_pc |
| 20834 hsa-mir-454 | SART3        | 0.332455827 mirna_pc |
| 20835 hsa-mir-454 | SR140        | 0.304800708 mirna_pc |
| 20836 hsa-mir-454 | TRA2B        | 0.335977617 mirna_pc |
| 20837 hsa-mir-454 | RSRC1        | 0.360526094 mirna_pc |
| 20838 hsa-mir-454 | CEP152       | 0.376425315 mirna_pc |
| 20839 hsa-mir-454 | RBM12B       | 0.303417112 mirna_pc |
| 20840 hsa-mir-454 | PSMD12       | 0.391514552 mirna_pc |
| 20841 hsa-mir-454 | C1orf174     | 0.310580214 mirna_pc |
| 20842 hsa-mir-454 | ENOPH1       | 0.315464106 mirna_pc |
| 20843 hsa-mir-454 | C17orf42     | 0.425427324 mirna_pc |

|                   |           |                      |
|-------------------|-----------|----------------------|
| 20844 hsa-mir-454 | DDX55     | 0.368343697 mirna_pc |
| 20845 hsa-mir-454 | SFPQ      | 0.348063702 mirna_pc |
| 20846 hsa-mir-454 | MPHOSPH9  | 0.302178324 mirna_pc |
| 20847 hsa-mir-454 | CADM1     | 0.378853753 mirna_pc |
| 20848 hsa-mir-454 | GMNN      | 0.336863457 mirna_pc |
| 20849 hsa-mir-454 | POLG2     | 0.433989321 mirna_pc |
| 20850 hsa-mir-454 | ANKRD32   | 0.505657164 mirna_pc |
| 20851 hsa-mir-454 | PDAP1     | 0.321900192 mirna_pc |
| 20852 hsa-mir-454 | GEMIN6    | 0.385936794 mirna_pc |
| 20853 hsa-mir-454 | PTCD1     | 0.351822467 mirna_pc |
| 20854 hsa-mir-454 | CRIPT     | 0.301893198 mirna_pc |
| 20855 hsa-mir-454 | KPNB1     | 0.315197727 mirna_pc |
| 20856 hsa-mir-454 | SMC3      | 0.403016364 mirna_pc |
| 20857 hsa-mir-454 | FLVCR1    | 0.304849855 mirna_pc |
| 20858 hsa-mir-454 | MEX3A     | 0.348108702 mirna_pc |
| 20859 hsa-mir-454 | COIL      | 0.400703343 mirna_pc |
| 20860 hsa-mir-454 | SFRS12    | 0.363422907 mirna_pc |
| 20861 hsa-mir-454 | SUZ12     | 0.358193575 mirna_pc |
| 20862 hsa-mir-454 | TMEM68    | 0.339711376 mirna_pc |
| 20863 hsa-mir-454 | LOC642846 | 0.373983933 mirna_pc |
| 20864 hsa-mir-454 | TGIF2     | 0.323194684 mirna_pc |
| 20865 hsa-mir-454 | ZC3H18    | 0.304516279 mirna_pc |
| 20866 hsa-mir-454 | THUMPD2   | 0.366344252 mirna_pc |
| 20867 hsa-mir-454 | FAM96A    | 0.309166578 mirna_pc |
| 20868 hsa-mir-454 | MTF2      | 0.389273168 mirna_pc |
| 20869 hsa-mir-454 | POLE      | 0.353521327 mirna_pc |
| 20870 hsa-mir-454 | C13orf27  | 0.305247685 mirna_pc |
| 20871 hsa-mir-454 | EXOSC9    | 0.320974933 mirna_pc |
| 20872 hsa-mir-454 | TMEM209   | 0.32802877 mirna_pc  |
| 20873 hsa-mir-454 | RBMX      | 0.388441438 mirna_pc |
| 20874 hsa-mir-454 | NOC3L     | 0.319378729 mirna_pc |
| 20875 hsa-mir-454 | PDIA6     | 0.331358172 mirna_pc |
| 20876 hsa-mir-454 | ZNF200    | 0.379504377 mirna_pc |
| 20877 hsa-mir-454 | UBXN2A    | 0.303065765 mirna_pc |
| 20878 hsa-mir-454 | DNAJC14   | 0.343091783 mirna_pc |
| 20879 hsa-mir-454 | CIT       | 0.309197966 mirna_pc |
| 20880 hsa-mir-454 | SCLT1     | 0.339293023 mirna_pc |
| 20881 hsa-mir-454 | SMN2      | 0.38768884 mirna_pc  |
| 20882 hsa-mir-454 | GPATCH4   | 0.334951308 mirna_pc |
| 20883 hsa-mir-454 | MPHOSPH10 | 0.361043214 mirna_pc |
| 20884 hsa-mir-454 | ATXN7L2   | 0.309222343 mirna_pc |
| 20885 hsa-mir-454 | C17orf67  | 0.326604291 mirna_pc |
| 20886 hsa-mir-454 | C7orf44   | 0.339262663 mirna_pc |
| 20887 hsa-mir-454 | NAT9      | 0.339285757 mirna_pc |
| 20888 hsa-mir-454 | UPF3B     | 0.354222494 mirna_pc |
| 20889 hsa-mir-454 | RDH14     | 0.344831038 mirna_pc |
| 20890 hsa-mir-454 | DDX20     | 0.35855012 mirna_pc  |
| 20891 hsa-mir-454 | IFT80     | 0.342206258 mirna_pc |
| 20892 hsa-mir-454 | RNF34     | 0.318890453 mirna_pc |
| 20893 hsa-mir-454 | DDX46     | 0.413405236 mirna_pc |
| 20894 hsa-mir-454 | UBE2N     | 0.333345396 mirna_pc |
| 20895 hsa-mir-454 | RNFT1     | 0.310828726 mirna_pc |
| 20896 hsa-mir-454 | CHAC2     | 0.32671371 mirna_pc  |
| 20897 hsa-mir-454 | TCERG1    | 0.353860146 mirna_pc |

|                   |           |                      |
|-------------------|-----------|----------------------|
| 20898 hsa-mir-454 | E2F6      | 0.422542869 mirna_pc |
| 20899 hsa-mir-454 | ZNF833    | 0.330862119 mirna_pc |
| 20900 hsa-mir-454 | FTSJ3     | 0.314698119 mirna_pc |
| 20901 hsa-mir-454 | CPSF4     | 0.350130295 mirna_pc |
| 20902 hsa-mir-454 | SFRS13A   | 0.408203173 mirna_pc |
| 20903 hsa-mir-454 | NUP35     | 0.311493975 mirna_pc |
| 20904 hsa-mir-454 | TFAM      | 0.344740881 mirna_pc |
| 20905 hsa-mir-454 | MTIF2     | 0.334727432 mirna_pc |
| 20906 hsa-mir-454 | EWSR1     | 0.308536191 mirna_pc |
| 20907 hsa-mir-454 | LOC222699 | 0.322709704 mirna_pc |
| 20908 hsa-mir-454 | HIST1H1C  | 0.329727867 mirna_pc |
| 20909 hsa-mir-454 | CCDC45    | 0.406695151 mirna_pc |
| 20910 hsa-mir-454 | SFRS7     | 0.366145082 mirna_pc |
| 20911 hsa-mir-454 | MRPL42    | 0.406236698 mirna_pc |
| 20912 hsa-mir-454 | CCAR1     | 0.333729257 mirna_pc |
| 20913 hsa-mir-454 | C2orf68   | 0.335479367 mirna_pc |
| 20914 hsa-mir-454 | C17orf80  | 0.363336286 mirna_pc |
| 20915 hsa-mir-454 | ZKSCAN5   | 0.323033586 mirna_pc |
| 20916 hsa-mir-454 | DCP2      | 0.324756833 mirna_pc |
| 20917 hsa-mir-454 | ZNF92     | 0.320007515 mirna_pc |
| 20918 hsa-mir-454 | C2orf44   | 0.387299639 mirna_pc |
| 20919 hsa-mir-454 | CCDC76    | 0.391270998 mirna_pc |
| 20920 hsa-mir-454 | C17orf58  | 0.365525795 mirna_pc |
| 20921 hsa-mir-454 | MATR3     | 0.322933346 mirna_pc |
| 20922 hsa-mir-454 | ZFP1      | 0.306287868 mirna_pc |
| 20923 hsa-mir-454 | NUP43     | 0.343977614 mirna_pc |
| 20924 hsa-mir-454 | ZNF473    | 0.33386526 mirna_pc  |
| 20925 hsa-mir-454 | DCLRE1A   | 0.323230933 mirna_pc |
| 20926 hsa-mir-454 | RBM25     | 0.37860765 mirna_pc  |
| 20927 hsa-mir-454 | PRPF38B   | 0.351078477 mirna_pc |
| 20928 hsa-mir-454 | TRDMT1    | 0.310666346 mirna_pc |
| 20929 hsa-mir-454 | PNN       | 0.345299245 mirna_pc |
| 20930 hsa-mir-454 | MNS1      | 0.363785098 mirna_pc |
| 20931 hsa-mir-454 | MTERF     | 0.3395526 mirna_pc   |
| 20932 hsa-mir-454 | SLC25A33  | 0.322837137 mirna_pc |
| 20933 hsa-mir-454 | GTF2H2C   | 0.403544057 mirna_pc |
| 20934 hsa-mir-454 | SNCAIP    | 0.30194983 mirna_pc  |
| 20935 hsa-mir-454 | GTF2H2    | 0.307871332 mirna_pc |
| 20936 hsa-mir-454 | FANCF     | 0.356366623 mirna_pc |
| 20937 hsa-mir-454 | FAM169A   | 0.322765799 mirna_pc |
| 20938 hsa-mir-454 | FAM119A   | 0.304452104 mirna_pc |
| 20939 hsa-mir-454 | C12orf65  | 0.384949094 mirna_pc |
| 20940 hsa-mir-454 | MRPL19    | 0.347918086 mirna_pc |
| 20941 hsa-mir-454 | SPRED1    | 0.325414104 mirna_pc |
| 20942 hsa-mir-454 | CETN3     | 0.304161065 mirna_pc |
| 20943 hsa-mir-454 | ZCCHC3    | 0.310599563 mirna_pc |
| 20944 hsa-mir-454 | ZCCHC9    | 0.350110856 mirna_pc |
| 20945 hsa-mir-454 | AADAT     | 0.306565931 mirna_pc |
| 20946 hsa-mir-454 | ACPI      | 0.325535269 mirna_pc |
| 20947 hsa-mir-454 | PRMT6     | 0.335619185 mirna_pc |
| 20948 hsa-mir-454 | SLC35B4   | 0.343355089 mirna_pc |
| 20949 hsa-mir-454 | ZNF239    | 0.317838363 mirna_pc |
| 20950 hsa-mir-454 | CCDC75    | 0.313969667 mirna_pc |
| 20951 hsa-mir-454 | PRTFDC1   | 0.308874333 mirna_pc |



|       |             |              |                   |          |
|-------|-------------|--------------|-------------------|----------|
| 20952 | hsa-mir-454 | ZNF670       | 0.321751442       | mirna_pc |
| 20953 | hsa-mir-454 | C3orf33      | 0.356174083       | mirna_pc |
| 20954 | hsa-mir-454 | ZNF326       | 0.337657901       | mirna_pc |
| 20955 | hsa-mir-454 | CCT6P1       | 0.301170562       | mirna_pc |
| 20956 | hsa-mir-766 | RRM2         | 0.344234722       | mirna_pc |
| 20957 | hsa-mir-766 | TIMELESS     | 0.354884962       | mirna_pc |
| 20958 | hsa-mir-766 | CDCA8        | 0.304803607       | mirna_pc |
| 20959 | hsa-mir-766 | ORC1L        | 0.316344907       | mirna_pc |
| 20960 | hsa-mir-766 | KNTC1        | 0.317812118       | mirna_pc |
| 20961 | hsa-mir-766 | DNMT1        | 0.309790622       | mirna_pc |
| 20962 | hsa-mir-766 | TRAIP        | 0.307709209       | mirna_pc |
| 20963 | hsa-mir-766 | POLD1        | 0.325382042       | mirna_pc |
| 20964 | hsa-mir-766 | ZNF229       | 0.362186237       | mirna_pc |
| 20965 | hsa-mir-766 | TUBA1B       | 0.309549088       | mirna_pc |
| 20966 | hsa-mir-766 | CHEK1        | 0.325870991       | mirna_pc |
| 20967 | hsa-mir-766 | RAN          | 0.317900254       | mirna_pc |
| 20968 | hsa-mir-766 | EFTUD2       | 0.307277415       | mirna_pc |
| 20969 | hsa-mir-766 | DEPDC1B      | 0.361268095       | mirna_pc |
| 20970 | hsa-mir-766 | CDKN1C       | 0.325499012       | mirna_pc |
| 20971 | hsa-mir-766 | NEURL3       | 0.343399726       | mirna_pc |
| 20972 | hsa-mir-766 | C5           | 0.400054352       | mirna_pc |
| 20973 | hsa-mir-766 | CDK2         | 0.408360196       | mirna_pc |
| 20974 | hsa-mir-766 | CDK4         | 0.333239282       | mirna_pc |
| 20975 | hsa-mir-766 | PRIM1        | 0.39147673        | mirna_pc |
| 20976 | hsa-mir-766 | SALL4        | 0.383143384       | mirna_pc |
| 20977 | hsa-mir-766 | E2F3         | 0.343549571       | mirna_pc |
| 20978 | hsa-mir-766 | CDC25A       | 0.367700341       | mirna_pc |
| 20979 | hsa-mir-766 | WNT3         | 0.306916614       | mirna_pc |
| 20980 | hsa-mir-766 | CPSF3        | 0.341421543       | mirna_pc |
| 20981 | hsa-mir-766 | IFI30        | 0.332727329       | mirna_pc |
| 20982 | hsa-mir-766 | DONSON       | 0.315029703       | mirna_pc |
| 20983 | hsa-mir-766 | LOC100128191 | 0.41103542        | mirna_pc |
| 20984 | hsa-mir-766 | INPP5B       | 0.367881796       | mirna_pc |
| 20985 | hsa-mir-766 | DNMT3B       | 0.313107224       | mirna_pc |
| 20986 | hsa-mir-766 | FZD2         | 0.373950774       | mirna_pc |
| 20987 | hsa-mir-766 | CTPS         | 0.394310778       | mirna_pc |
| 20988 | hsa-mir-766 | PA2G4        | 0.341600769       | mirna_pc |
| 20989 | hsa-mir-766 | AHCY         | 0.308264884       | mirna_pc |
| 20990 | hsa-mir-766 |              | 6-Sep 0.388868551 | mirna_pc |
| 20991 | hsa-mir-766 | GNL2         | 0.393249635       | mirna_pc |
| 20992 | hsa-mir-766 | NASP         | 0.304374063       | mirna_pc |
| 20993 | hsa-mir-766 | CBX4         | 0.340783513       | mirna_pc |
| 20994 | hsa-mir-766 | OBFC2B       | 0.324510715       | mirna_pc |
| 20995 | hsa-mir-766 | SCARB1       | 0.382231257       | mirna_pc |
| 20996 | hsa-mir-766 | TFR2         | 0.40392687        | mirna_pc |
| 20997 | hsa-mir-766 | APOE         | 0.353709887       | mirna_pc |
| 20998 | hsa-mir-766 | DUSP9        | 0.379222444       | mirna_pc |
| 20999 | hsa-mir-766 | MOV10        | 0.408645422       | mirna_pc |
| 21000 | hsa-mir-766 | PAK1IP1      | 0.300387833       | mirna_pc |
| 21001 | hsa-mir-766 | PPT1         | 0.375232546       | mirna_pc |
| 21002 | hsa-mir-766 | PPP2R1B      | 0.362270733       | mirna_pc |
| 21003 | hsa-mir-766 | PRAME        | 0.379327922       | mirna_pc |
| 21004 | hsa-mir-766 | NOC4L        | 0.323765883       | mirna_pc |
| 21005 | hsa-mir-766 | SAE1         | 0.388980875       | mirna_pc |

|                   |           |                      |
|-------------------|-----------|----------------------|
| 21006 hsa-mir-766 | THTPA     | 0.324966705 mirna_pc |
| 21007 hsa-mir-766 | ITIH4     | 0.360267452 mirna_pc |
| 21008 hsa-mir-766 | ZC3H10    | 0.349081921 mirna_pc |
| 21009 hsa-mir-766 | CADM1     | 0.359597343 mirna_pc |
| 21010 hsa-mir-766 | POLA1     | 0.307274097 mirna_pc |
| 21011 hsa-mir-766 | GMNN      | 0.325685596 mirna_pc |
| 21012 hsa-mir-766 | PA2G4P4   | 0.337242851 mirna_pc |
| 21013 hsa-mir-766 | ANKRD32   | 0.300255117 mirna_pc |
| 21014 hsa-mir-766 | SMARCA1   | 0.369156768 mirna_pc |
| 21015 hsa-mir-766 | GPAM      | 0.351493162 mirna_pc |
| 21016 hsa-mir-766 | ACAN      | 0.32702089 mirna_pc  |
| 21017 hsa-mir-766 | AKIRIN1   | 0.376833924 mirna_pc |
| 21018 hsa-mir-766 | PIK3AP1   | 0.376087739 mirna_pc |
| 21019 hsa-mir-766 | CIB2      | 0.310417862 mirna_pc |
| 21020 hsa-mir-766 | TARBP2    | 0.353968198 mirna_pc |
| 21021 hsa-mir-766 | SF3A3     | 0.46074104 mirna_pc  |
| 21022 hsa-mir-766 | POLE      | 0.395138096 mirna_pc |
| 21023 hsa-mir-766 | CHML      | 0.352162541 mirna_pc |
| 21024 hsa-mir-766 | TRIAP1    | 0.388783986 mirna_pc |
| 21025 hsa-mir-766 | RTN4RL2   | 0.318780621 mirna_pc |
| 21026 hsa-mir-766 | ADSL      | 0.311102759 mirna_pc |
| 21027 hsa-mir-766 | UNG       | 0.314511437 mirna_pc |
| 21028 hsa-mir-766 | GPC3      | 0.433557352 mirna_pc |
| 21029 hsa-mir-766 | POP5      | 0.309037479 mirna_pc |
| 21030 hsa-mir-766 | ZNF642    | 0.302925457 mirna_pc |
| 21031 hsa-mir-766 | GPN3      | 0.300642226 mirna_pc |
| 21032 hsa-mir-766 | DNAJC14   | 0.330073639 mirna_pc |
| 21033 hsa-mir-766 | KDM2B     | 0.349478034 mirna_pc |
| 21034 hsa-mir-766 | YRDC      | 0.326825481 mirna_pc |
| 21035 hsa-mir-766 | LYPD1     | 0.381596005 mirna_pc |
| 21036 hsa-mir-766 | ITPRIPL1  | 0.35333882 mirna_pc  |
| 21037 hsa-mir-766 | GDPD5     | 0.317298505 mirna_pc |
| 21038 hsa-mir-766 | ZNF643    | 0.38879674 mirna_pc  |
| 21039 hsa-mir-766 | BCL7A     | 0.338785602 mirna_pc |
| 21040 hsa-mir-766 | PLAGL2    | 0.361742348 mirna_pc |
| 21041 hsa-mir-766 | FRAT1     | 0.303167305 mirna_pc |
| 21042 hsa-mir-766 | GATC      | 0.382358269 mirna_pc |
| 21043 hsa-mir-766 | DDX20     | 0.308565873 mirna_pc |
| 21044 hsa-mir-766 | RNF34     | 0.361047336 mirna_pc |
| 21045 hsa-mir-766 | Clorf109  | 0.38850838 mirna_pc  |
| 21046 hsa-mir-766 | PABPC4    | 0.365455908 mirna_pc |
| 21047 hsa-mir-766 | ZNF833    | 0.337321377 mirna_pc |
| 21048 hsa-mir-766 | LOC222699 | 0.445157422 mirna_pc |
| 21049 hsa-mir-766 | AAAS      | 0.342816738 mirna_pc |
| 21050 hsa-mir-766 | ACVR2B    | 0.318031654 mirna_pc |
| 21051 hsa-mir-766 | DKK 1.00  | 0.362343535 mirna_pc |
| 21052 hsa-mir-766 | BCORL1    | 0.30662009 mirna_pc  |
| 21053 hsa-mir-766 | SERPINF2  | 0.457760988 mirna_pc |
| 21054 hsa-mir-766 | CA5BP     | 0.38330222 mirna_pc  |
| 21055 hsa-mir-766 | VPS33A    | 0.470875849 mirna_pc |
| 21056 hsa-mir-766 | KCNG1     | 0.404926157 mirna_pc |
| 21057 hsa-mir-766 | GGT1      | 0.335121339 mirna_pc |
| 21058 hsa-mir-766 | POLR3B    | 0.341457149 mirna_pc |
| 21059 hsa-mir-766 | RNF26     | 0.366960492 mirna_pc |

|       |             |           |             |          |
|-------|-------------|-----------|-------------|----------|
| 21060 | hsa-mir-766 | MYCBP     | 0.334658989 | mirna_pc |
| 21061 | hsa-mir-766 | GDF11     | 0.410352089 | mirna_pc |
| 21062 | hsa-mir-766 | ANXA9     | 0.369212856 | mirna_pc |
| 21063 | hsa-mir-766 | GLYCTK    | 0.304755449 | mirna_pc |
| 21064 | hsa-mir-766 | MYL6B     | 0.317597474 | mirna_pc |
| 21065 | hsa-mir-766 | ARID3B    | 0.416330681 | mirna_pc |
| 21066 | hsa-mir-766 | RNF41     | 0.414567921 | mirna_pc |
| 21067 | hsa-mir-766 | UTP11L    | 0.394941978 | mirna_pc |
| 21068 | hsa-mir-766 | ZW10      | 0.33701912  | mirna_pc |
| 21069 | hsa-mir-766 | HIC2      | 0.456534627 | mirna_pc |
| 21070 | hsa-mir-766 | LRFN1     | 0.30795655  | mirna_pc |
| 21071 | hsa-mir-766 | NLRP2     | 0.384858521 | mirna_pc |
| 21072 | hsa-mir-766 | PHF16     | 0.344859579 | mirna_pc |
| 21073 | hsa-mir-766 | ESYT1     | 0.344685109 | mirna_pc |
| 21074 | hsa-mir-766 | MBNL3     | 0.376347355 | mirna_pc |
| 21075 | hsa-mir-766 | TSPYL3    | 0.316266249 | mirna_pc |
| 21076 | hsa-mir-766 | SF3A1     | 0.306971807 | mirna_pc |
| 21077 | hsa-mir-766 | TRIM24    | 0.419440827 | mirna_pc |
| 21078 | hsa-mir-766 | ABCC4     | 0.310499063 | mirna_pc |
| 21079 | hsa-mir-766 | C21orf67  | 0.33569961  | mirna_pc |
| 21080 | hsa-mir-766 | PPIE      | 0.375342296 | mirna_pc |
| 21081 | hsa-mir-766 | RASL10B   | 0.33912536  | mirna_pc |
| 21082 | hsa-mir-766 | CCDC134   | 0.38199971  | mirna_pc |
| 21083 | hsa-mir-766 | NUDT17    | 0.310383479 | mirna_pc |
| 21084 | hsa-mir-766 | C2orf72   | 0.32514197  | mirna_pc |
| 21085 | hsa-mir-766 | EP400     | 0.345393437 | mirna_pc |
| 21086 | hsa-mir-766 | FHL3      | 0.34094432  | mirna_pc |
| 21087 | hsa-mir-766 | PBX2      | 0.353472767 | mirna_pc |
| 21088 | hsa-mir-766 | SNCAIP    | 0.315444536 | mirna_pc |
| 21089 | hsa-mir-766 | RRAGC     | 0.36490729  | mirna_pc |
| 21090 | hsa-mir-766 | ZBTB39    | 0.356507865 | mirna_pc |
| 21091 | hsa-mir-766 | HYOU1     | 0.383385009 | mirna_pc |
| 21092 | hsa-mir-766 | HSD17B14  | 0.360023427 | mirna_pc |
| 21093 | hsa-mir-766 | NFYC      | 0.322704231 | mirna_pc |
| 21094 | hsa-mir-766 | PLIN2     | 0.388189456 | mirna_pc |
| 21095 | hsa-mir-766 | DHRS2     | 0.393767688 | mirna_pc |
| 21096 | hsa-mir-766 | GCN1L1    | 0.360430178 | mirna_pc |
| 21097 | hsa-mir-766 | LOC645166 | 0.330979918 | mirna_pc |
| 21098 | hsa-mir-766 | TAF9      | 0.334242364 | mirna_pc |
| 21099 | hsa-mir-766 | NDUFS5    | 0.310659482 | mirna_pc |
| 21100 | hsa-mir-766 | ASXL1     | 0.310455676 | mirna_pc |
| 21101 | hsa-mir-766 | SNIP1     | 0.318732998 | mirna_pc |
| 21102 | hsa-mir-766 | UTP15     | 0.324105608 | mirna_pc |
| 21103 | hsa-mir-766 | NFRKB     | 0.300072859 | mirna_pc |
| 21104 | hsa-mir-766 | ACP2      | 0.406006295 | mirna_pc |
| 21105 | hsa-mir-766 | FRAS1     | 0.431872407 | mirna_pc |
| 21106 | hsa-mir-766 | CD40      | 0.307926765 | mirna_pc |
| 21107 | hsa-mir-766 | LOC80054  | 0.32449444  | mirna_pc |
| 21108 | hsa-mir-766 | SEMA6D    | 0.324271695 | mirna_pc |
| 21109 | hsa-mir-766 | ZMYM3     | 0.326327412 | mirna_pc |
| 21110 | hsa-mir-766 | ZNF530    | 0.300587628 | mirna_pc |
| 21111 | hsa-mir-766 | AGT       | 0.324660698 | mirna_pc |
| 21112 | hsa-mir-766 | C12orf43  | 0.320125225 | mirna_pc |
| 21113 | hsa-mir-766 | SLC37A4   | 0.403630118 | mirna_pc |

|                   |          |                      |
|-------------------|----------|----------------------|
| 21114 hsa-mir-766 | MARS     | 0.356788419 mirna_pc |
| 21115 hsa-mir-197 | TPX2     | 0.45116458 mirna_pc  |
| 21116 hsa-mir-197 | KIF4B    | 0.388143022 mirna_pc |
| 21117 hsa-mir-197 | CENPF    | 0.308566977 mirna_pc |
| 21118 hsa-mir-197 | RCC2     | 0.415791953 mirna_pc |
| 21119 hsa-mir-197 | HOXC9    | 0.402233771 mirna_pc |
| 21120 hsa-mir-197 | KIF11    | 0.359601974 mirna_pc |
| 21121 hsa-mir-197 | RRM2     | 0.381806498 mirna_pc |
| 21122 hsa-mir-197 | CDK1     | 0.325191649 mirna_pc |
| 21123 hsa-mir-197 | CDC25C   | 0.340057403 mirna_pc |
| 21124 hsa-mir-197 | MYBL2    | 0.55060664 mirna_pc  |
| 21125 hsa-mir-197 | PCNA     | 0.307113202 mirna_pc |
| 21126 hsa-mir-197 | UBE2C    | 0.479833341 mirna_pc |
| 21127 hsa-mir-197 | BUB1     | 0.313404955 mirna_pc |
| 21128 hsa-mir-197 | PRC1     | 0.412589976 mirna_pc |
| 21129 hsa-mir-197 | NUSAP1   | 0.438158615 mirna_pc |
| 21130 hsa-mir-197 | MCM4     | 0.301473598 mirna_pc |
| 21131 hsa-mir-197 | KIFC1    | 0.426670928 mirna_pc |
| 21132 hsa-mir-197 | BUB1B    | 0.505302379 mirna_pc |
| 21133 hsa-mir-197 | HDGF     | 0.3633938 mirna_pc   |
| 21134 hsa-mir-197 | KIF18B   | 0.30298011 mirna_pc  |
| 21135 hsa-mir-197 | FAM72A   | 0.32459701 mirna_pc  |
| 21136 hsa-mir-197 | KIF2C    | 0.446234241 mirna_pc |
| 21137 hsa-mir-197 | FANCA    | 0.354790899 mirna_pc |
| 21138 hsa-mir-197 | NCAPG    | 0.448428342 mirna_pc |
| 21139 hsa-mir-197 | CDC20    | 0.431406455 mirna_pc |
| 21140 hsa-mir-197 | CLSPN    | 0.352002067 mirna_pc |
| 21141 hsa-mir-197 | SGOL1    | 0.385197332 mirna_pc |
| 21142 hsa-mir-197 | CCNA2    | 0.358964353 mirna_pc |
| 21143 hsa-mir-197 | CDC25B   | 0.331327932 mirna_pc |
| 21144 hsa-mir-197 | SPC25    | 0.344846598 mirna_pc |
| 21145 hsa-mir-197 | FANCI    | 0.456762946 mirna_pc |
| 21146 hsa-mir-197 | NEK2     | 0.413870424 mirna_pc |
| 21147 hsa-mir-197 | MND1     | 0.398694429 mirna_pc |
| 21148 hsa-mir-197 | NCAPH    | 0.399674208 mirna_pc |
| 21149 hsa-mir-197 | GTSE1    | 0.367161336 mirna_pc |
| 21150 hsa-mir-197 | KIF23    | 0.348156083 mirna_pc |
| 21151 hsa-mir-197 | RAD54L   | 0.551565679 mirna_pc |
| 21152 hsa-mir-197 | CENPA    | 0.346606501 mirna_pc |
| 21153 hsa-mir-197 | MAD2L1   | 0.419117715 mirna_pc |
| 21154 hsa-mir-197 | TIMELESS | 0.500801616 mirna_pc |
| 21155 hsa-mir-197 | CDCA8    | 0.456193731 mirna_pc |
| 21156 hsa-mir-197 | TROAP    | 0.408256363 mirna_pc |
| 21157 hsa-mir-197 | CCNB1    | 0.315026714 mirna_pc |
| 21158 hsa-mir-197 | CDCA5    | 0.46961763 mirna_pc  |
| 21159 hsa-mir-197 | CDC45    | 0.387182137 mirna_pc |
| 21160 hsa-mir-197 | STMN1    | 0.524420748 mirna_pc |
| 21161 hsa-mir-197 | CENPM    | 0.383797202 mirna_pc |
| 21162 hsa-mir-197 | EXO1     | 0.307370101 mirna_pc |
| 21163 hsa-mir-197 | UBE2T    | 0.436754191 mirna_pc |
| 21164 hsa-mir-197 | CKS2     | 0.323980242 mirna_pc |
| 21165 hsa-mir-197 | CKS1B    | 0.537756858 mirna_pc |
| 21166 hsa-mir-197 | TUBB     | 0.420912438 mirna_pc |
| 21167 hsa-mir-197 | MCM2     | 0.383590954 mirna_pc |

|                   |          |                      |
|-------------------|----------|----------------------|
| 21168 hsa-mir-197 | KIF4A    | 0.420754906 mirna_pc |
| 21169 hsa-mir-197 | ORC1L    | 0.421914758 mirna_pc |
| 21170 hsa-mir-197 | KNTC1    | 0.404544398 mirna_pc |
| 21171 hsa-mir-197 | RACGAP1  | 0.362972407 mirna_pc |
| 21172 hsa-mir-197 | PTBP1    | 0.32485231 mirna_pc  |
| 21173 hsa-mir-197 | CCNB2    | 0.342009711 mirna_pc |
| 21174 hsa-mir-197 | NUF2     | 0.304208281 mirna_pc |
| 21175 hsa-mir-197 | PLK4     | 0.367899825 mirna_pc |
| 21176 hsa-mir-197 | FANCB    | 0.32183862 mirna_pc  |
| 21177 hsa-mir-197 | KIF18A   | 0.325069145 mirna_pc |
| 21178 hsa-mir-197 | DEPDC1   | 0.430448587 mirna_pc |
| 21179 hsa-mir-197 | HJURP    | 0.366917113 mirna_pc |
| 21180 hsa-mir-197 | SKA1     | 0.35494749 mirna_pc  |
| 21181 hsa-mir-197 | RAD51    | 0.457533281 mirna_pc |
| 21182 hsa-mir-197 | BLM      | 0.442919613 mirna_pc |
| 21183 hsa-mir-197 | DNMT1    | 0.398555461 mirna_pc |
| 21184 hsa-mir-197 | BIRC5    | 0.369637557 mirna_pc |
| 21185 hsa-mir-197 | RCC1     | 0.402588165 mirna_pc |
| 21186 hsa-mir-197 | OIP5     | 0.495297454 mirna_pc |
| 21187 hsa-mir-197 | DTL      | 0.389762337 mirna_pc |
| 21188 hsa-mir-197 | RECQL4   | 0.475140722 mirna_pc |
| 21189 hsa-mir-197 | AURKA    | 0.374005898 mirna_pc |
| 21190 hsa-mir-197 | AURKB    | 0.408090658 mirna_pc |
| 21191 hsa-mir-197 | GSG2     | 0.329547542 mirna_pc |
| 21192 hsa-mir-197 | CDT1     | 0.306534437 mirna_pc |
| 21193 hsa-mir-197 | MCM10    | 0.408920788 mirna_pc |
| 21194 hsa-mir-197 | SGOL2    | 0.358032012 mirna_pc |
| 21195 hsa-mir-197 | CHEK2    | 0.416305039 mirna_pc |
| 21196 hsa-mir-197 | KIF15    | 0.403097232 mirna_pc |
| 21197 hsa-mir-197 | CDCA3    | 0.379233207 mirna_pc |
| 21198 hsa-mir-197 | C1orf112 | 0.403862363 mirna_pc |
| 21199 hsa-mir-197 | FEN1     | 0.394042048 mirna_pc |
| 21200 hsa-mir-197 | TRAIP    | 0.418477229 mirna_pc |
| 21201 hsa-mir-197 | PSMA7    | 0.499750135 mirna_pc |
| 21202 hsa-mir-197 | CASC5    | 0.302984182 mirna_pc |
| 21203 hsa-mir-197 | C16orf59 | 0.407781878 mirna_pc |
| 21204 hsa-mir-197 | RAE1     | 0.465255924 mirna_pc |
| 21205 hsa-mir-197 | ADRM1    | 0.498505358 mirna_pc |
| 21206 hsa-mir-197 | FAM72B   | 0.318261113 mirna_pc |
| 21207 hsa-mir-197 | NEIL3    | 0.307256728 mirna_pc |
| 21208 hsa-mir-197 | MCM7     | 0.337377193 mirna_pc |
| 21209 hsa-mir-197 | POLD1    | 0.409512587 mirna_pc |
| 21210 hsa-mir-197 | C12orf48 | 0.399486921 mirna_pc |
| 21211 hsa-mir-197 | HNRNPL   | 0.421871332 mirna_pc |
| 21212 hsa-mir-197 | ZWILCH   | 0.361432657 mirna_pc |
| 21213 hsa-mir-197 | TTK      | 0.372244701 mirna_pc |
| 21214 hsa-mir-197 | ZWINT    | 0.436718448 mirna_pc |
| 21215 hsa-mir-197 | TUBA1B   | 0.463282594 mirna_pc |
| 21216 hsa-mir-197 | UBE2S    | 0.415355212 mirna_pc |
| 21217 hsa-mir-197 | NCAPD2   | 0.315241812 mirna_pc |
| 21218 hsa-mir-197 | HNRNPC   | 0.33145281 mirna_pc  |
| 21219 hsa-mir-197 | ILF2     | 0.55023233 mirna_pc  |
| 21220 hsa-mir-197 | C6orf167 | 0.325609632 mirna_pc |
| 21221 hsa-mir-197 | MCM5     | 0.35081756 mirna_pc  |

|                   |          |                      |
|-------------------|----------|----------------------|
| 21222 hsa-mir-197 | RAN      | 0.418587794 mirna_pc |
| 21223 hsa-mir-197 | TYMS     | 0.397869467 mirna_pc |
| 21224 hsa-mir-197 | MCM6     | 0.363611611 mirna_pc |
| 21225 hsa-mir-197 | CDCA7    | 0.307915111 mirna_pc |
| 21226 hsa-mir-197 | EPR1     | 0.330475713 mirna_pc |
| 21227 hsa-mir-197 | H2AFX    | 0.306786288 mirna_pc |
| 21228 hsa-mir-197 | UCK2     | 0.475329618 mirna_pc |
| 21229 hsa-mir-197 | NFKBIL2  | 0.395136438 mirna_pc |
| 21230 hsa-mir-197 | C15orf42 | 0.40369764 mirna_pc  |
| 21231 hsa-mir-197 | PTGES3   | 0.373446355 mirna_pc |
| 21232 hsa-mir-197 | PRIM2    | 0.429793733 mirna_pc |
| 21233 hsa-mir-197 | HMGB3    | 0.319255688 mirna_pc |
| 21234 hsa-mir-197 | RTKN     | 0.334004135 mirna_pc |
| 21235 hsa-mir-197 | FAM64A   | 0.402757083 mirna_pc |
| 21236 hsa-mir-197 | RANBP1   | 0.440529183 mirna_pc |
| 21237 hsa-mir-197 | E2F1     | 0.479322876 mirna_pc |
| 21238 hsa-mir-197 | E2F2     | 0.307331574 mirna_pc |
| 21239 hsa-mir-197 | SNRPG    | 0.305145731 mirna_pc |
| 21240 hsa-mir-197 | TH1L     | 0.464851044 mirna_pc |
| 21241 hsa-mir-197 | MCM3     | 0.383389337 mirna_pc |
| 21242 hsa-mir-197 | SNRPA    | 0.411169788 mirna_pc |
| 21243 hsa-mir-197 | DNAJC9   | 0.328355296 mirna_pc |
| 21244 hsa-mir-197 | DEPDC1B  | 0.313274049 mirna_pc |
| 21245 hsa-mir-197 | POC1A    | 0.417081304 mirna_pc |
| 21246 hsa-mir-197 | CENPO    | 0.45285638 mirna_pc  |
| 21247 hsa-mir-197 | NUDT1    | 0.300449884 mirna_pc |
| 21248 hsa-mir-197 | CCT3     | 0.426554473 mirna_pc |
| 21249 hsa-mir-197 | GINS2    | 0.319492389 mirna_pc |
| 21250 hsa-mir-197 | DNA2     | 0.342526924 mirna_pc |
| 21251 hsa-mir-197 | NOP56    | 0.315948818 mirna_pc |
| 21252 hsa-mir-197 | CSE1L    | 0.497196258 mirna_pc |
| 21253 hsa-mir-197 | DTYMK    | 0.368109973 mirna_pc |
| 21254 hsa-mir-197 | MLF1IP   | 0.342175331 mirna_pc |
| 21255 hsa-mir-197 | HSPE1    | 0.331623675 mirna_pc |
| 21256 hsa-mir-197 | EBNA1BP2 | 0.314547852 mirna_pc |
| 21257 hsa-mir-197 | CFL1     | 0.357232364 mirna_pc |
| 21258 hsa-mir-197 | TCF19    | 0.312292174 mirna_pc |
| 21259 hsa-mir-197 | CAD      | 0.376336948 mirna_pc |
| 21260 hsa-mir-197 | CDK2     | 0.456905497 mirna_pc |
| 21261 hsa-mir-197 | CDK4     | 0.508155515 mirna_pc |
| 21262 hsa-mir-197 | CKAP5    | 0.380431064 mirna_pc |
| 21263 hsa-mir-197 | BCL2L12  | 0.300291014 mirna_pc |
| 21264 hsa-mir-197 | HNRNPR   | 0.312391686 mirna_pc |
| 21265 hsa-mir-197 | PRIM1    | 0.394079491 mirna_pc |
| 21266 hsa-mir-197 | CENPH    | 0.380130992 mirna_pc |
| 21267 hsa-mir-197 | CHAF1B   | 0.503638143 mirna_pc |
| 21268 hsa-mir-197 | RALY     | 0.332515069 mirna_pc |
| 21269 hsa-mir-197 | MSH2     | 0.368250004 mirna_pc |
| 21270 hsa-mir-197 | SF3B3    | 0.347433938 mirna_pc |
| 21271 hsa-mir-197 | CDC7     | 0.382704351 mirna_pc |
| 21272 hsa-mir-197 | PUS1     | 0.343091748 mirna_pc |
| 21273 hsa-mir-197 | SNRPC    | 0.461256222 mirna_pc |
| 21274 hsa-mir-197 | PSMB4    | 0.306650962 mirna_pc |
| 21275 hsa-mir-197 | RFC4     | 0.369498445 mirna_pc |

|                   |              |                      |
|-------------------|--------------|----------------------|
| 21276 hsa-mir-197 | FBX05        | 0.391853861 mirna_pc |
| 21277 hsa-mir-197 | DCLRE1B      | 0.431951709 mirna_pc |
| 21278 hsa-mir-197 | MDK          | 0.321580296 mirna_pc |
| 21279 hsa-mir-197 | E2F3         | 0.325490962 mirna_pc |
| 21280 hsa-mir-197 | RUVBL2       | 0.43090059 mirna_pc  |
| 21281 hsa-mir-197 | CDC25A       | 0.493193505 mirna_pc |
| 21282 hsa-mir-197 | TMEM48       | 0.325677285 mirna_pc |
| 21283 hsa-mir-197 | RAD54B       | 0.359747121 mirna_pc |
| 21284 hsa-mir-197 | H2AFZ        | 0.367097611 mirna_pc |
| 21285 hsa-mir-197 | MAGOH        | 0.392315471 mirna_pc |
| 21286 hsa-mir-197 | DDX12        | 0.300444772 mirna_pc |
| 21287 hsa-mir-197 | DSCC1        | 0.315135019 mirna_pc |
| 21288 hsa-mir-197 | NUP37        | 0.35479221 mirna_pc  |
| 21289 hsa-mir-197 | CLN6         | 0.32843583 mirna_pc  |
| 21290 hsa-mir-197 | MCM8         | 0.363812637 mirna_pc |
| 21291 hsa-mir-197 | CPSF3        | 0.328351115 mirna_pc |
| 21292 hsa-mir-197 | BANF1        | 0.380898245 mirna_pc |
| 21293 hsa-mir-197 | SNRPE        | 0.456522765 mirna_pc |
| 21294 hsa-mir-197 | C21orf45     | 0.376731986 mirna_pc |
| 21295 hsa-mir-197 | ATIC         | 0.317702832 mirna_pc |
| 21296 hsa-mir-197 | PPM1G        | 0.340879226 mirna_pc |
| 21297 hsa-mir-197 | MARCKSL1     | 0.333797566 mirna_pc |
| 21298 hsa-mir-197 | NPM3         | 0.322651549 mirna_pc |
| 21299 hsa-mir-197 | NUDT5        | 0.332984187 mirna_pc |
| 21300 hsa-mir-197 | DAZAP1       | 0.32659798 mirna_pc  |
| 21301 hsa-mir-197 | CBX8         | 0.313386204 mirna_pc |
| 21302 hsa-mir-197 | WDR34        | 0.301927956 mirna_pc |
| 21303 hsa-mir-197 | TMEM201      | 0.444043391 mirna_pc |
| 21304 hsa-mir-197 | MRPL9        | 0.305751417 mirna_pc |
| 21305 hsa-mir-197 | PFDN4        | 0.36030371 mirna_pc  |
| 21306 hsa-mir-197 | PAFAH1B3     | 0.325641884 mirna_pc |
| 21307 hsa-mir-197 | SRRT         | 0.301916936 mirna_pc |
| 21308 hsa-mir-197 | CACYBP       | 0.301029697 mirna_pc |
| 21309 hsa-mir-197 | SASS6        | 0.357310387 mirna_pc |
| 21310 hsa-mir-197 | PSRC1        | 0.596412337 mirna_pc |
| 21311 hsa-mir-197 | POU2F1       | 0.384050638 mirna_pc |
| 21312 hsa-mir-197 | STIP1        | 0.373157882 mirna_pc |
| 21313 hsa-mir-197 | CEP72        | 0.34306697 mirna_pc  |
| 21314 hsa-mir-197 | TMPO         | 0.393648593 mirna_pc |
| 21315 hsa-mir-197 | VBP1         | 0.343124858 mirna_pc |
| 21316 hsa-mir-197 | MRT04        | 0.433177587 mirna_pc |
| 21317 hsa-mir-197 | PPIH         | 0.368142437 mirna_pc |
| 21318 hsa-mir-197 | RCN1         | 0.325890251 mirna_pc |
| 21319 hsa-mir-197 | CCDC138      | 0.311482979 mirna_pc |
| 21320 hsa-mir-197 | LOC100128191 | 0.443154174 mirna_pc |
| 21321 hsa-mir-197 | HMG2         | 0.376447264 mirna_pc |
| 21322 hsa-mir-197 | POLA2        | 0.36384628 mirna_pc  |
| 21323 hsa-mir-197 | SNRPF        | 0.316142991 mirna_pc |
| 21324 hsa-mir-197 | SNRPA1       | 0.416349643 mirna_pc |
| 21325 hsa-mir-197 | SKP2         | 0.436007568 mirna_pc |
| 21326 hsa-mir-197 | TIPIN        | 0.366607207 mirna_pc |
| 21327 hsa-mir-197 | HSPBP1       | 0.304819367 mirna_pc |
| 21328 hsa-mir-197 | C4orf46      | 0.325929595 mirna_pc |
| 21329 hsa-mir-197 | DNMT3B       | 0.316984882 mirna_pc |

|                   |          |                      |
|-------------------|----------|----------------------|
| 21330 hsa-mir-197 | UTP14A   | 0.326195157 mirna_pc |
| 21331 hsa-mir-197 | CTPS     | 0.306184439 mirna_pc |
| 21332 hsa-mir-197 | GPN1     | 0.308193004 mirna_pc |
| 21333 hsa-mir-197 | RFC5     | 0.360705941 mirna_pc |
| 21334 hsa-mir-197 | MAZ      | 0.319966148 mirna_pc |
| 21335 hsa-mir-197 | SSRP1    | 0.409780578 mirna_pc |
| 21336 hsa-mir-197 | POLR2D   | 0.360787738 mirna_pc |
| 21337 hsa-mir-197 | PA2G4    | 0.442956989 mirna_pc |
| 21338 hsa-mir-197 | SNRPD3   | 0.366453196 mirna_pc |
| 21339 hsa-mir-197 | KHDRBS1  | 0.375782304 mirna_pc |
| 21340 hsa-mir-197 | SLC5A6   | 0.418596801 mirna_pc |
| 21341 hsa-mir-197 | C20orf27 | 0.36792161 mirna_pc  |
| 21342 hsa-mir-197 | TOMM34   | 0.487351365 mirna_pc |
| 21343 hsa-mir-197 | CCDC21   | 0.371542354 mirna_pc |
| 21344 hsa-mir-197 | MTL 5.00 | 0.328388262 mirna_pc |
| 21345 hsa-mir-197 | GGH      | 0.481663937 mirna_pc |
| 21346 hsa-mir-197 | RNF220   | 0.349068871 mirna_pc |
| 21347 hsa-mir-197 | AHCY     | 0.318439211 mirna_pc |
| 21348 hsa-mir-197 | PARP1    | 0.310857035 mirna_pc |
| 21349 hsa-mir-197 | CCT7     | 0.335858837 mirna_pc |
| 21350 hsa-mir-197 | TMEM194A | 0.391821596 mirna_pc |
| 21351 hsa-mir-197 | SNRNP40  | 0.490640419 mirna_pc |
| 21352 hsa-mir-197 | SUV420H2 | 0.329373352 mirna_pc |
| 21353 hsa-mir-197 | ZNF695   | 0.389546455 mirna_pc |
| 21354 hsa-mir-197 | TMEM69   | 0.323872138 mirna_pc |
| 21355 hsa-mir-197 | TIMM8A   | 0.363125445 mirna_pc |
| 21356 hsa-mir-197 | GNL2     | 0.335485338 mirna_pc |
| 21357 hsa-mir-197 | WRAP53   | 0.316774758 mirna_pc |
| 21358 hsa-mir-197 | NOC2L    | 0.300720411 mirna_pc |
| 21359 hsa-mir-197 | NASP     | 0.421686173 mirna_pc |
| 21360 hsa-mir-197 | LAGE3    | 0.324648058 mirna_pc |
| 21361 hsa-mir-197 | NONO     | 0.513813436 mirna_pc |
| 21362 hsa-mir-197 | CCDC86   | 0.32571941 mirna_pc  |
| 21363 hsa-mir-197 | OBFC2B   | 0.499413057 mirna_pc |
| 21364 hsa-mir-197 | WDR76    | 0.383365367 mirna_pc |
| 21365 hsa-mir-197 | LSM 4.00 | 0.308141399 mirna_pc |
| 21366 hsa-mir-197 | DENR     | 0.346422849 mirna_pc |
| 21367 hsa-mir-197 | SCARB1   | 0.528402992 mirna_pc |
| 21368 hsa-mir-197 | ELK1     | 0.339597378 mirna_pc |
| 21369 hsa-mir-197 | C11orf84 | 0.362484581 mirna_pc |
| 21370 hsa-mir-197 | TBCE     | 0.3223955 mirna_pc   |
| 21371 hsa-mir-197 | SUV39H2  | 0.378848628 mirna_pc |
| 21372 hsa-mir-197 | LSM 2.00 | 0.383401436 mirna_pc |
| 21373 hsa-mir-197 | RIBC2    | 0.324816622 mirna_pc |
| 21374 hsa-mir-197 | DPY30    | 0.3021789 mirna_pc   |
| 21375 hsa-mir-197 | RRP9     | 0.333442416 mirna_pc |
| 21376 hsa-mir-197 | DPH2     | 0.422862013 mirna_pc |
| 21377 hsa-mir-197 | GTPBP4   | 0.311696989 mirna_pc |
| 21378 hsa-mir-197 | MTCH2    | 0.392429704 mirna_pc |
| 21379 hsa-mir-197 | SCAMP3   | 0.339065074 mirna_pc |
| 21380 hsa-mir-197 | MEN1     | 0.369553332 mirna_pc |
| 21381 hsa-mir-197 | CCT4     | 0.358035709 mirna_pc |
| 21382 hsa-mir-197 | SAC3D1   | 0.406305697 mirna_pc |
| 21383 hsa-mir-197 | ELAVL1   | 0.346503122 mirna_pc |



|                   |            |                      |
|-------------------|------------|----------------------|
| 21384 hsa-mir-197 | MRPL4      | 0.326332853 mirna_pc |
| 21385 hsa-mir-197 | MOV10      | 0.308151333 mirna_pc |
| 21386 hsa-mir-197 | RPS21      | 0.528980333 mirna_pc |
| 21387 hsa-mir-197 | TBC1D7     | 0.327507397 mirna_pc |
| 21388 hsa-mir-197 | PAK1IP1    | 0.44943517 mirna_pc  |
| 21389 hsa-mir-197 | SLC1A5     | 0.359750549 mirna_pc |
| 21390 hsa-mir-197 | PES 1.00   | 0.307785185 mirna_pc |
| 21391 hsa-mir-197 | PGAM5      | 0.404005281 mirna_pc |
| 21392 hsa-mir-197 | KDM1A      | 0.388603115 mirna_pc |
| 21393 hsa-mir-197 | ILF3       | 0.312427617 mirna_pc |
| 21394 hsa-mir-197 | NT5DC2     | 0.344320304 mirna_pc |
| 21395 hsa-mir-197 | EHMT2      | 0.451066074 mirna_pc |
| 21396 hsa-mir-197 | DEK        | 0.318922163 mirna_pc |
| 21397 hsa-mir-197 | SFRS9      | 0.380556586 mirna_pc |
| 21398 hsa-mir-197 | PDRG1      | 0.345199296 mirna_pc |
| 21399 hsa-mir-197 | SAAL1      | 0.310627741 mirna_pc |
| 21400 hsa-mir-197 | TAF4       | 0.358575601 mirna_pc |
| 21401 hsa-mir-197 | HEATR2     | 0.362226185 mirna_pc |
| 21402 hsa-mir-197 | PRAME      | 0.376421481 mirna_pc |
| 21403 hsa-mir-197 | SUV39H1    | 0.3630449 mirna_pc   |
| 21404 hsa-mir-197 | IPO9       | 0.403633352 mirna_pc |
| 21405 hsa-mir-197 | SART3      | 0.345693521 mirna_pc |
| 21406 hsa-mir-197 | C15orf23   | 0.426794932 mirna_pc |
| 21407 hsa-mir-197 | AMPD2      | 0.383141065 mirna_pc |
| 21408 hsa-mir-197 | LSM14B     | 0.460075503 mirna_pc |
| 21409 hsa-mir-197 | NOC4L      | 0.331586215 mirna_pc |
| 21410 hsa-mir-197 | DIABLO     | 0.360427845 mirna_pc |
| 21411 hsa-mir-197 | LRRC42     | 0.390610282 mirna_pc |
| 21412 hsa-mir-197 | SAE1       | 0.374044302 mirna_pc |
| 21413 hsa-mir-197 | ITGB3BP    | 0.36498951 mirna_pc  |
| 21414 hsa-mir-197 | PABPC1L    | 0.336038573 mirna_pc |
| 21415 hsa-mir-197 | LAS1L      | 0.32131383 mirna_pc  |
| 21416 hsa-mir-197 | PDCD6      | 0.324859304 mirna_pc |
| 21417 hsa-mir-197 | NCRNA00176 | 0.361709785 mirna_pc |
| 21418 hsa-mir-197 | SFPQ       | 0.320025285 mirna_pc |
| 21419 hsa-mir-197 | VPS72      | 0.320148687 mirna_pc |
| 21420 hsa-mir-197 | FAM125B    | 0.458006903 mirna_pc |
| 21421 hsa-mir-197 | EPHB2      | 0.355949371 mirna_pc |
| 21422 hsa-mir-197 | AS3MT      | 0.319594656 mirna_pc |
| 21423 hsa-mir-197 | ATAD3A     | 0.431386732 mirna_pc |
| 21424 hsa-mir-197 | SMS        | 0.349701959 mirna_pc |
| 21425 hsa-mir-197 | CADM1      | 0.391868905 mirna_pc |
| 21426 hsa-mir-197 | SHMT2      | 0.359859473 mirna_pc |
| 21427 hsa-mir-197 | POLA1      | 0.441473728 mirna_pc |
| 21428 hsa-mir-197 | HDAC2      | 0.447010001 mirna_pc |
| 21429 hsa-mir-197 | MRPL12     | 0.336544136 mirna_pc |
| 21430 hsa-mir-197 | GMNN       | 0.389137808 mirna_pc |
| 21431 hsa-mir-197 | CSNK1E     | 0.382579942 mirna_pc |
| 21432 hsa-mir-197 | PA2G4P4    | 0.472269164 mirna_pc |
| 21433 hsa-mir-197 | RRP12      | 0.301336369 mirna_pc |
| 21434 hsa-mir-197 | ASCL2      | 0.385287506 mirna_pc |
| 21435 hsa-mir-197 | SLC39A1    | 0.363477003 mirna_pc |
| 21436 hsa-mir-197 | BRI3BP     | 0.304040895 mirna_pc |
| 21437 hsa-mir-197 | CSTF1      | 0.335200924 mirna_pc |

|                   |           |                      |
|-------------------|-----------|----------------------|
| 21438 hsa-mir-197 | DUT       | 0.355776239 mirna_pc |
| 21439 hsa-mir-197 | MSH6      | 0.36705088 mirna_pc  |
| 21440 hsa-mir-197 | SRM       | 0.31997496 mirna_pc  |
| 21441 hsa-mir-197 | XRCC6     | 0.336851132 mirna_pc |
| 21442 hsa-mir-197 | PSMG1     | 0.307363391 mirna_pc |
| 21443 hsa-mir-197 | PPP1R8    | 0.321225754 mirna_pc |
| 21444 hsa-mir-197 | NUDT3     | 0.346939394 mirna_pc |
| 21445 hsa-mir-197 | MEX3A     | 0.409974023 mirna_pc |
| 21446 hsa-mir-197 | DHX37     | 0.337964071 mirna_pc |
| 21447 hsa-mir-197 | PPAN      | 0.380670016 mirna_pc |
| 21448 hsa-mir-197 | PDCD11    | 0.329728817 mirna_pc |
| 21449 hsa-mir-197 | RFC2      | 0.351370522 mirna_pc |
| 21450 hsa-mir-197 | TAF5      | 0.370960875 mirna_pc |
| 21451 hsa-mir-197 | PDIA3     | 0.306548605 mirna_pc |
| 21452 hsa-mir-197 | TRIM28    | 0.330963737 mirna_pc |
| 21453 hsa-mir-197 | CCDC28B   | 0.320783117 mirna_pc |
| 21454 hsa-mir-197 | TSEN34    | 0.332832873 mirna_pc |
| 21455 hsa-mir-197 | UNC119B   | 0.370611292 mirna_pc |
| 21456 hsa-mir-197 | MAD2L2    | 0.366882272 mirna_pc |
| 21457 hsa-mir-197 | HNRNPA1L2 | 0.307274297 mirna_pc |
| 21458 hsa-mir-197 | SARS      | 0.316551719 mirna_pc |
| 21459 hsa-mir-197 | SUMO1P3   | 0.336436389 mirna_pc |
| 21460 hsa-mir-197 | TMEM39B   | 0.328280984 mirna_pc |
| 21461 hsa-mir-197 | PRPF31    | 0.33986561 mirna_pc  |
| 21462 hsa-mir-197 | FARSB     | 0.301025027 mirna_pc |
| 21463 hsa-mir-197 | ERI3      | 0.384911777 mirna_pc |
| 21464 hsa-mir-197 | RCN2      | 0.364889047 mirna_pc |
| 21465 hsa-mir-197 | CIB2      | 0.414193071 mirna_pc |
| 21466 hsa-mir-197 | MTF2      | 0.328795606 mirna_pc |
| 21467 hsa-mir-197 | TARBP2    | 0.423425833 mirna_pc |
| 21468 hsa-mir-197 | TOMM22    | 0.334348491 mirna_pc |
| 21469 hsa-mir-197 | EBP       | 0.30818068 mirna_pc  |
| 21470 hsa-mir-197 | C12orf52  | 0.413974267 mirna_pc |
| 21471 hsa-mir-197 | TCP1      | 0.32999419 mirna_pc  |
| 21472 hsa-mir-197 | SF3A3     | 0.374354287 mirna_pc |
| 21473 hsa-mir-197 | POLE      | 0.525355847 mirna_pc |
| 21474 hsa-mir-197 | C8orf30A  | 0.322116516 mirna_pc |
| 21475 hsa-mir-197 | MUTYH     | 0.378701042 mirna_pc |
| 21476 hsa-mir-197 | CHML      | 0.31009358 mirna_pc  |
| 21477 hsa-mir-197 | WRNIP1    | 0.370258809 mirna_pc |
| 21478 hsa-mir-197 | TRIAP1    | 0.341101288 mirna_pc |
| 21479 hsa-mir-197 | ADSL      | 0.398141012 mirna_pc |
| 21480 hsa-mir-197 | NPHP4     | 0.495819325 mirna_pc |
| 21481 hsa-mir-197 | ZNF350    | 0.323186256 mirna_pc |
| 21482 hsa-mir-197 | UNG       | 0.362530647 mirna_pc |
| 21483 hsa-mir-197 | RBMX      | 0.335778693 mirna_pc |
| 21484 hsa-mir-197 | CDK16     | 0.418327494 mirna_pc |
| 21485 hsa-mir-197 | ALKBH2    | 0.336802375 mirna_pc |
| 21486 hsa-mir-197 | BAMBI     | 0.34455325 mirna_pc  |
| 21487 hsa-mir-197 | CCDC90A   | 0.394074058 mirna_pc |
| 21488 hsa-mir-197 | MDC 1.00  | 0.331692185 mirna_pc |
| 21489 hsa-mir-197 | CSNK2B    | 0.323232804 mirna_pc |
| 21490 hsa-mir-197 | PDIA6     | 0.305423743 mirna_pc |
| 21491 hsa-mir-197 | GPN3      | 0.367132857 mirna_pc |

|                   |           |                      |
|-------------------|-----------|----------------------|
| 21492 hsa-mir-197 | MRPL37    | 0.433864395 mirna_pc |
| 21493 hsa-mir-197 | EIF3I     | 0.383249907 mirna_pc |
| 21494 hsa-mir-197 | DNAJC14   | 0.361684171 mirna_pc |
| 21495 hsa-mir-197 | KDM2B     | 0.33885751 mirna_pc  |
| 21496 hsa-mir-197 | PCGF6     | 0.318162279 mirna_pc |
| 21497 hsa-mir-197 | PUSL1     | 0.34952231 mirna_pc  |
| 21498 hsa-mir-197 | CNPY2     | 0.31814369 mirna_pc  |
| 21499 hsa-mir-197 | FAM136A   | 0.345028219 mirna_pc |
| 21500 hsa-mir-197 | NKD2      | 0.396181692 mirna_pc |
| 21501 hsa-mir-197 | APOA1BP   | 0.324111082 mirna_pc |
| 21502 hsa-mir-197 | ZSCAN5A   | 0.418715386 mirna_pc |
| 21503 hsa-mir-197 | YRDC      | 0.359969977 mirna_pc |
| 21504 hsa-mir-197 | SMARCB1   | 0.336566902 mirna_pc |
| 21505 hsa-mir-197 | DDX54     | 0.308845337 mirna_pc |
| 21506 hsa-mir-197 | PYG02     | 0.317936745 mirna_pc |
| 21507 hsa-mir-197 | CCT8      | 0.31338446 mirna_pc  |
| 21508 hsa-mir-197 | FAM40A    | 0.311981955 mirna_pc |
| 21509 hsa-mir-197 | KCTD17    | 0.400970439 mirna_pc |
| 21510 hsa-mir-197 | ITPR1PL1  | 0.426698373 mirna_pc |
| 21511 hsa-mir-197 | GDPD5     | 0.357713052 mirna_pc |
| 21512 hsa-mir-197 | RPS7      | 0.3121169 mirna_pc   |
| 21513 hsa-mir-197 | ATXN7L2   | 0.409391973 mirna_pc |
| 21514 hsa-mir-197 | LOC401010 | 0.370748814 mirna_pc |
| 21515 hsa-mir-197 | STRA13    | 0.405099805 mirna_pc |
| 21516 hsa-mir-197 | KIAA0090  | 0.327106971 mirna_pc |
| 21517 hsa-mir-197 | BCL7A     | 0.420528985 mirna_pc |
| 21518 hsa-mir-197 | ST13      | 0.321810695 mirna_pc |
| 21519 hsa-mir-197 | LAMA1     | 0.310714046 mirna_pc |
| 21520 hsa-mir-197 | NOTUM     | 0.385983636 mirna_pc |
| 21521 hsa-mir-197 | ARNT2     | 0.443588146 mirna_pc |
| 21522 hsa-mir-197 | PRPF38A   | 0.30435814 mirna_pc  |
| 21523 hsa-mir-197 | WDR77     | 0.449626194 mirna_pc |
| 21524 hsa-mir-197 | MRPL21    | 0.330710834 mirna_pc |
| 21525 hsa-mir-197 | ILKAP     | 0.31725521 mirna_pc  |
| 21526 hsa-mir-197 | PRR3      | 0.31286704 mirna_pc  |
| 21527 hsa-mir-197 | MGC72080  | 0.305584027 mirna_pc |
| 21528 hsa-mir-197 | CTNNB1    | 0.323696917 mirna_pc |
| 21529 hsa-mir-197 | SEMA4F    | 0.317448905 mirna_pc |
| 21530 hsa-mir-197 | GANAB     | 0.383797811 mirna_pc |
| 21531 hsa-mir-197 | DDX20     | 0.455463585 mirna_pc |
| 21532 hsa-mir-197 | RNF34     | 0.315624975 mirna_pc |
| 21533 hsa-mir-197 | Clorf109  | 0.327487884 mirna_pc |
| 21534 hsa-mir-197 | FGGY      | 0.348596742 mirna_pc |
| 21535 hsa-mir-197 | UBE2N     | 0.375123342 mirna_pc |
| 21536 hsa-mir-197 | SEC61A2   | 0.361104738 mirna_pc |
| 21537 hsa-mir-197 | C20orf43  | 0.312142232 mirna_pc |
| 21538 hsa-mir-197 | COPZ1     | 0.379210545 mirna_pc |
| 21539 hsa-mir-197 | SLC25A10  | 0.302854619 mirna_pc |
| 21540 hsa-mir-197 | MAPKAPK5  | 0.447789408 mirna_pc |
| 21541 hsa-mir-197 | GPR3      | 0.339396604 mirna_pc |
| 21542 hsa-mir-197 | DRG1      | 0.37817847 mirna_pc  |
| 21543 hsa-mir-197 | NOL7      | 0.375756073 mirna_pc |
| 21544 hsa-mir-197 | HUNK      | 0.329669837 mirna_pc |
| 21545 hsa-mir-197 | B4GALT3   | 0.32184721 mirna_pc  |

|                   |          |                      |
|-------------------|----------|----------------------|
| 21546 hsa-mir-197 | DEPDC7   | 0.390984563 mirna_pc |
| 21547 hsa-mir-197 | UBL4A    | 0.329726582 mirna_pc |
| 21548 hsa-mir-197 | SCLY     | 0.344591579 mirna_pc |
| 21549 hsa-mir-197 | RPL5     | 0.337114827 mirna_pc |
| 21550 hsa-mir-197 | FIZ1     | 0.381474114 mirna_pc |
| 21551 hsa-mir-197 | GGA1     | 0.339139294 mirna_pc |
| 21552 hsa-mir-197 | DHRS13   | 0.317544336 mirna_pc |
| 21553 hsa-mir-197 | RPF1     | 0.394012005 mirna_pc |
| 21554 hsa-mir-197 | EWSR1    | 0.382873485 mirna_pc |
| 21555 hsa-mir-197 | KRR1     | 0.313832013 mirna_pc |
| 21556 hsa-mir-197 | ALX3     | 0.371822368 mirna_pc |
| 21557 hsa-mir-197 | GTPBP5   | 0.380559838 mirna_pc |
| 21558 hsa-mir-197 | AAAS     | 0.447431595 mirna_pc |
| 21559 hsa-mir-197 | UBQLN4   | 0.318228915 mirna_pc |
| 21560 hsa-mir-197 | CHST14   | 0.331912652 mirna_pc |
| 21561 hsa-mir-197 | ACVR2B   | 0.429548838 mirna_pc |
| 21562 hsa-mir-197 | CABLES2  | 0.408898761 mirna_pc |
| 21563 hsa-mir-197 | MRPS26   | 0.313135029 mirna_pc |
| 21564 hsa-mir-197 | GNL3     | 0.337752838 mirna_pc |
| 21565 hsa-mir-197 | NOL12    | 0.300403688 mirna_pc |
| 21566 hsa-mir-197 | BCORL1   | 0.308531807 mirna_pc |
| 21567 hsa-mir-197 | RPS16    | 0.319768032 mirna_pc |
| 21568 hsa-mir-197 | AKR7A2   | 0.342297028 mirna_pc |
| 21569 hsa-mir-197 | BEND3    | 0.39267282 mirna_pc  |
| 21570 hsa-mir-197 | C18orf10 | 0.314135673 mirna_pc |
| 21571 hsa-mir-197 | EMD      | 0.328630911 mirna_pc |
| 21572 hsa-mir-197 | CA5BP    | 0.36894583 mirna_pc  |
| 21573 hsa-mir-197 | PCBP2    | 0.362823887 mirna_pc |
| 21574 hsa-mir-197 | NKD1     | 0.470488612 mirna_pc |
| 21575 hsa-mir-197 | MRPS16   | 0.317067792 mirna_pc |
| 21576 hsa-mir-197 | PFAS     | 0.389702575 mirna_pc |
| 21577 hsa-mir-197 | SF3B2    | 0.306574111 mirna_pc |
| 21578 hsa-mir-197 | COQ3     | 0.306346866 mirna_pc |
| 21579 hsa-mir-197 | RPL7     | 0.341978867 mirna_pc |
| 21580 hsa-mir-197 | RBM38    | 0.393448121 mirna_pc |
| 21581 hsa-mir-197 | SNUPN    | 0.340402378 mirna_pc |
| 21582 hsa-mir-197 | RPUSD2   | 0.332702404 mirna_pc |
| 21583 hsa-mir-197 | NUP153   | 0.359690663 mirna_pc |
| 21584 hsa-mir-197 | NIPSNAP1 | 0.315287652 mirna_pc |
| 21585 hsa-mir-197 | SERBP1   | 0.32398994 mirna_pc  |
| 21586 hsa-mir-197 | RDBP     | 0.341536381 mirna_pc |
| 21587 hsa-mir-197 | FAM10A4  | 0.351515574 mirna_pc |
| 21588 hsa-mir-197 | ARL 2.00 | 0.344643788 mirna_pc |
| 21589 hsa-mir-197 | EEF1E1   | 0.346251809 mirna_pc |
| 21590 hsa-mir-197 | YBX1     | 0.348442243 mirna_pc |
| 21591 hsa-mir-197 | TCTN2    | 0.314102167 mirna_pc |
| 21592 hsa-mir-197 | RPL14    | 0.357229586 mirna_pc |
| 21593 hsa-mir-197 | UBE2M    | 0.300396799 mirna_pc |
| 21594 hsa-mir-197 | TIMM17B  | 0.32895764 mirna_pc  |
| 21595 hsa-mir-197 | SEPHS1   | 0.434011696 mirna_pc |
| 21596 hsa-mir-197 | POMGNT1  | 0.340823985 mirna_pc |
| 21597 hsa-mir-197 | DPH5     | 0.304605788 mirna_pc |
| 21598 hsa-mir-197 | TMEM9    | 0.337209283 mirna_pc |
| 21599 hsa-mir-197 | SUB1     | 0.309691745 mirna_pc |

|                   |          |                      |
|-------------------|----------|----------------------|
| 21600 hsa-mir-197 | AGBL5    | 0.327358197 mirna_pc |
| 21601 hsa-mir-197 | ERP29    | 0.304659321 mirna_pc |
| 21602 hsa-mir-197 | MYL6B    | 0.44226322 mirna_pc  |
| 21603 hsa-mir-197 | RPS17    | 0.303724352 mirna_pc |
| 21604 hsa-mir-197 | PIGT     | 0.407441309 mirna_pc |
| 21605 hsa-mir-197 | POLR2F   | 0.416836707 mirna_pc |
| 21606 hsa-mir-197 | PIPSL    | 0.311441926 mirna_pc |
| 21607 hsa-mir-197 | ATP5E    | 0.33261051 mirna_pc  |
| 21608 hsa-mir-197 | UQCRHL   | 0.312669305 mirna_pc |
| 21609 hsa-mir-197 | CAMTA1   | 0.338829929 mirna_pc |
| 21610 hsa-mir-197 | EIF2B3   | 0.300156066 mirna_pc |
| 21611 hsa-mir-197 | TMEM14C  | 0.32262726 mirna_pc  |
| 21612 hsa-mir-197 | NME4     | 0.332464839 mirna_pc |
| 21613 hsa-mir-197 | LYRM4    | 0.378240647 mirna_pc |
| 21614 hsa-mir-197 | MMACHC   | 0.439429184 mirna_pc |
| 21615 hsa-mir-197 | RNF41    | 0.348321442 mirna_pc |
| 21616 hsa-mir-197 | USP21    | 0.321513653 mirna_pc |
| 21617 hsa-mir-197 | ANP32A   | 0.39684601 mirna_pc  |
| 21618 hsa-mir-197 | ZNF775   | 0.364805251 mirna_pc |
| 21619 hsa-mir-197 | SUPV3L1  | 0.34638765 mirna_pc  |
| 21620 hsa-mir-197 | DPF2     | 0.342686586 mirna_pc |
| 21621 hsa-mir-197 | RTCD1    | 0.304135484 mirna_pc |
| 21622 hsa-mir-197 | C17orf81 | 0.314233907 mirna_pc |
| 21623 hsa-mir-197 | HIC2     | 0.306442634 mirna_pc |
| 21624 hsa-mir-197 | UBE2J2   | 0.300117038 mirna_pc |
| 21625 hsa-mir-197 | NAP1L1   | 0.394284909 mirna_pc |
| 21626 hsa-mir-197 | SMG5     | 0.370028453 mirna_pc |
| 21627 hsa-mir-197 | GLT25D2  | 0.352305993 mirna_pc |
| 21628 hsa-mir-197 | PHF16    | 0.32042541 mirna_pc  |
| 21629 hsa-mir-197 | CDKN2A   | 0.309308719 mirna_pc |
| 21630 hsa-mir-197 | BUD13    | 0.324396075 mirna_pc |
| 21631 hsa-mir-197 | CDC34    | 0.33812451 mirna_pc  |
| 21632 hsa-mir-197 | MANEAL   | 0.300426773 mirna_pc |
| 21633 hsa-mir-197 | RPS10    | 0.346904488 mirna_pc |
| 21634 hsa-mir-197 | MYCN     | 0.359947409 mirna_pc |
| 21635 hsa-mir-197 | SBK1     | 0.340395702 mirna_pc |
| 21636 hsa-mir-197 | SF3A1    | 0.35138627 mirna_pc  |
| 21637 hsa-mir-197 | RPS5     | 0.386340985 mirna_pc |
| 21638 hsa-mir-197 | USP13    | 0.330858152 mirna_pc |
| 21639 hsa-mir-197 | CCDC134  | 0.320754054 mirna_pc |
| 21640 hsa-mir-197 | HS2ST1   | 0.340048337 mirna_pc |
| 21641 hsa-mir-197 | SLC25A33 | 0.361582597 mirna_pc |
| 21642 hsa-mir-197 | RPLP2    | 0.321998257 mirna_pc |
| 21643 hsa-mir-197 | GPR37    | 0.336858047 mirna_pc |
| 21644 hsa-mir-197 | RANGRF   | 0.31892473 mirna_pc  |
| 21645 hsa-mir-197 | MSI1     | 0.446004288 mirna_pc |
| 21646 hsa-mir-197 | CLPB     | 0.324269193 mirna_pc |
| 21647 hsa-mir-197 | SMARCC1  | 0.414517442 mirna_pc |
| 21648 hsa-mir-197 | CTPS2    | 0.34300462 mirna_pc  |
| 21649 hsa-mir-197 | FGD1     | 0.312953028 mirna_pc |
| 21650 hsa-mir-197 | RPLP0    | 0.311873318 mirna_pc |
| 21651 hsa-mir-197 | MRPL20   | 0.338742782 mirna_pc |
| 21652 hsa-mir-197 | ZNF740   | 0.304219535 mirna_pc |
| 21653 hsa-mir-197 | DDX51    | 0.349778554 mirna_pc |

|                   |           |                      |
|-------------------|-----------|----------------------|
| 21654 hsa-mir-197 | CST7      | 0.364081115 mirna_pc |
| 21655 hsa-mir-197 | ZNF232    | 0.314941329 mirna_pc |
| 21656 hsa-mir-197 | ZBTB39    | 0.38915342 mirna_pc  |
| 21657 hsa-mir-197 | SGTA      | 0.302090788 mirna_pc |
| 21658 hsa-mir-197 | POLR2L    | 0.309550703 mirna_pc |
| 21659 hsa-mir-197 | MED17     | 0.306033152 mirna_pc |
| 21660 hsa-mir-197 | C3orf75   | 0.320415927 mirna_pc |
| 21661 hsa-mir-197 | ASPSCR1   | 0.322641922 mirna_pc |
| 21662 hsa-mir-197 | TOE1      | 0.360749958 mirna_pc |
| 21663 hsa-mir-197 | RBBP4     | 0.350250238 mirna_pc |
| 21664 hsa-mir-197 | LOC221710 | 0.312152944 mirna_pc |
| 21665 hsa-mir-197 | NACA      | 0.302284146 mirna_pc |
| 21666 hsa-mir-197 | RPS12     | 0.348431123 mirna_pc |
| 21667 hsa-mir-197 | PTPMT1    | 0.338771254 mirna_pc |
| 21668 hsa-mir-197 | NACA2     | 0.334796572 mirna_pc |
| 21669 hsa-mir-197 | FAF1      | 0.317858713 mirna_pc |
| 21670 hsa-mir-197 | LONP1     | 0.321387977 mirna_pc |
| 21671 hsa-mir-197 | LRDD      | 0.327159788 mirna_pc |
| 21672 hsa-mir-197 | SCML2     | 0.404862694 mirna_pc |
| 21673 hsa-mir-197 | RPSAP58   | 0.378065421 mirna_pc |
| 21674 hsa-mir-197 | ANKRD54   | 0.303549525 mirna_pc |
| 21675 hsa-mir-197 | PDXP      | 0.509095813 mirna_pc |
| 21676 hsa-mir-197 | KIAA1274  | 0.342781229 mirna_pc |
| 21677 hsa-mir-197 | ETV5      | 0.349913078 mirna_pc |
| 21678 hsa-mir-197 | COX7A2L   | 0.300109946 mirna_pc |
| 21679 hsa-mir-197 | PROX1     | 0.481367618 mirna_pc |
| 21680 hsa-mir-197 | DACT2     | 0.336989648 mirna_pc |
| 21681 hsa-mir-197 | CHID1     | 0.396073621 mirna_pc |
| 21682 hsa-mir-197 | IGHMBP2   | 0.301059755 mirna_pc |
| 21683 hsa-mir-197 | RNF5P1    | 0.364928299 mirna_pc |
| 21684 hsa-mir-197 | HBXIP     | 0.39267579 mirna_pc  |
| 21685 hsa-mir-197 | GNG4      | 0.377996582 mirna_pc |
| 21686 hsa-mir-197 | IL17RB    | 0.30423996 mirna_pc  |
| 21687 hsa-mir-197 | CDAN1     | 0.345150182 mirna_pc |
| 21688 hsa-mir-197 | RPSA      | 0.393047474 mirna_pc |
| 21689 hsa-mir-197 | CD320     | 0.307233541 mirna_pc |
| 21690 hsa-mir-197 | SERF1A    | 0.344081169 mirna_pc |
| 21691 hsa-mir-197 | PREB      | 0.4450282 mirna_pc   |
| 21692 hsa-mir-197 | PRMT6     | 0.354249294 mirna_pc |
| 21693 hsa-mir-197 | ZMYM3     | 0.301475769 mirna_pc |
| 21694 hsa-mir-197 | ANAPC5    | 0.313392743 mirna_pc |
| 21695 hsa-mir-197 | VAPB      | 0.428445583 mirna_pc |
| 21696 hsa-mir-197 | UBL7      | 0.305263805 mirna_pc |
| 21697 hsa-mir-197 | YARS      | 0.32028194 mirna_pc  |
| 21698 hsa-mir-197 | PRDX4     | 0.394627693 mirna_pc |
| 21699 hsa-mir-197 | IGF2      | 0.305701811 mirna_pc |
| 21700 hsa-mir-197 | TMEM14B   | 0.37632223 mirna_pc  |
| 21701 hsa-mir-197 | RBBP7     | 0.30691779 mirna_pc  |
| 21702 hsa-mir-197 | THOC5     | 0.312836571 mirna_pc |
| 21703 hsa-mir-197 | PCBD1     | 0.321592053 mirna_pc |
| 21704 hsa-mir-197 | ZBED1     | 0.434602624 mirna_pc |
| 21705 hsa-mir-197 | EIF2S3    | 0.399459277 mirna_pc |
| 21706 hsa-mir-197 | CENPV     | 0.326333288 mirna_pc |
| 21707 hsa-mir-197 | DNMT3A    | 0.351415764 mirna_pc |

|                     |          |                      |
|---------------------|----------|----------------------|
| 21708 hsa-mir-197   | MARS     | 0.349318105 mirna_pc |
| 21709 hsa-mir-197   | C10orf75 | 0.333290676 mirna_pc |
| 21710 hsa-mir-197   | CKAP4    | 0.329603015 mirna_pc |
| 21711 hsa-mir-197   | INHBB    | 0.415286564 mirna_pc |
| 21712 hsa-mir-197   | TET1     | 0.357649508 mirna_pc |
| 21713 hsa-mir-197   | APOO     | 0.533714154 mirna_pc |
| 21714 hsa-mir-197   | C12orf73 | 0.371459859 mirna_pc |
| 21715 hsa-mir-197   | DOM3Z    | 0.313239333 mirna_pc |
| 21716 hsa-mir-197   | ANKRD52  | 0.324963499 mirna_pc |
| 21717 hsa-mir-103-1 | TPX2     | 0.409967104 mirna_pc |
| 21718 hsa-mir-103-1 | KIF4B    | 0.334286704 mirna_pc |
| 21719 hsa-mir-103-1 | CENPF    | 0.35984651 mirna_pc  |
| 21720 hsa-mir-103-1 | RCC2     | 0.338094148 mirna_pc |
| 21721 hsa-mir-103-1 | KIF11    | 0.374836837 mirna_pc |
| 21722 hsa-mir-103-1 | CDK1     | 0.346683744 mirna_pc |
| 21723 hsa-mir-103-1 | CDC25C   | 0.488271576 mirna_pc |
| 21724 hsa-mir-103-1 | PCNA     | 0.464921069 mirna_pc |
| 21725 hsa-mir-103-1 | UBE2C    | 0.393776968 mirna_pc |
| 21726 hsa-mir-103-1 | BUB1     | 0.33367835 mirna_pc  |
| 21727 hsa-mir-103-1 | NUSAP1   | 0.401129703 mirna_pc |
| 21728 hsa-mir-103-1 | MCM4     | 0.308361334 mirna_pc |
| 21729 hsa-mir-103-1 | KIFC1    | 0.361253632 mirna_pc |
| 21730 hsa-mir-103-1 | BUB1B    | 0.318479876 mirna_pc |
| 21731 hsa-mir-103-1 | HDGF     | 0.351041416 mirna_pc |
| 21732 hsa-mir-103-1 | KIF18B   | 0.315505941 mirna_pc |
| 21733 hsa-mir-103-1 | CKAP2    | 0.310872187 mirna_pc |
| 21734 hsa-mir-103-1 | KIF2C    | 0.406749762 mirna_pc |
| 21735 hsa-mir-103-1 | FANCA    | 0.327735367 mirna_pc |
| 21736 hsa-mir-103-1 | NCAPG    | 0.459910844 mirna_pc |
| 21737 hsa-mir-103-1 | CLSPN    | 0.328272104 mirna_pc |
| 21738 hsa-mir-103-1 | SGOL1    | 0.40247244 mirna_pc  |
| 21739 hsa-mir-103-1 | CCNA2    | 0.406431766 mirna_pc |
| 21740 hsa-mir-103-1 | CBX3     | 0.335235659 mirna_pc |
| 21741 hsa-mir-103-1 | SPC25    | 0.386111939 mirna_pc |
| 21742 hsa-mir-103-1 | FANCI    | 0.304444169 mirna_pc |
| 21743 hsa-mir-103-1 | NEK2     | 0.42995095 mirna_pc  |
| 21744 hsa-mir-103-1 | MND1     | 0.379509461 mirna_pc |
| 21745 hsa-mir-103-1 | KIF22    | 0.346471587 mirna_pc |
| 21746 hsa-mir-103-1 | DDX39    | 0.35975839 mirna_pc  |
| 21747 hsa-mir-103-1 | NCAPH    | 0.360196446 mirna_pc |
| 21748 hsa-mir-103-1 | GTSE1    | 0.326658962 mirna_pc |
| 21749 hsa-mir-103-1 | RAD54L   | 0.338118507 mirna_pc |
| 21750 hsa-mir-103-1 | CENPA    | 0.321510299 mirna_pc |
| 21751 hsa-mir-103-1 | MAD2L1   | 0.471765388 mirna_pc |
| 21752 hsa-mir-103-1 | TIMELESS | 0.4042282 mirna_pc   |
| 21753 hsa-mir-103-1 | LMNB1    | 0.518959741 mirna_pc |
| 21754 hsa-mir-103-1 | CDCA8    | 0.383729165 mirna_pc |
| 21755 hsa-mir-103-1 | TROAP    | 0.434023444 mirna_pc |
| 21756 hsa-mir-103-1 | TACC3    | 0.330154121 mirna_pc |
| 21757 hsa-mir-103-1 | XPO1     | 0.328827954 mirna_pc |
| 21758 hsa-mir-103-1 | STMN1    | 0.425743852 mirna_pc |
| 21759 hsa-mir-103-1 | CENPM    | 0.319358969 mirna_pc |
| 21760 hsa-mir-103-1 | EXO1     | 0.30959964 mirna_pc  |
| 21761 hsa-mir-103-1 | UBE2T    | 0.333447834 mirna_pc |

|                     |           |                      |
|---------------------|-----------|----------------------|
| 21762 hsa-mir-103-1 | CKS1B     | 0.31165771 mirna_pc  |
| 21763 hsa-mir-103-1 | KIF4A     | 0.343623977 mirna_pc |
| 21764 hsa-mir-103-1 | ORC1L     | 0.306855802 mirna_pc |
| 21765 hsa-mir-103-1 | SNRPB     | 0.481168586 mirna_pc |
| 21766 hsa-mir-103-1 | KNTC1     | 0.311196468 mirna_pc |
| 21767 hsa-mir-103-1 | CCNF      | 0.325662091 mirna_pc |
| 21768 hsa-mir-103-1 | PTBP1     | 0.315608707 mirna_pc |
| 21769 hsa-mir-103-1 | CCNB2     | 0.339078786 mirna_pc |
| 21770 hsa-mir-103-1 | NUF2      | 0.434654755 mirna_pc |
| 21771 hsa-mir-103-1 | PLK4      | 0.386890162 mirna_pc |
| 21772 hsa-mir-103-1 | DEPDC1    | 0.35218856 mirna_pc  |
| 21773 hsa-mir-103-1 | PTTG1     | 0.311892286 mirna_pc |
| 21774 hsa-mir-103-1 | SKA3      | 0.300973592 mirna_pc |
| 21775 hsa-mir-103-1 | HJURP     | 0.469969354 mirna_pc |
| 21776 hsa-mir-103-1 | SKA1      | 0.386344797 mirna_pc |
| 21777 hsa-mir-103-1 | PAICS     | 0.395761814 mirna_pc |
| 21778 hsa-mir-103-1 | CCDC150   | 0.404623451 mirna_pc |
| 21779 hsa-mir-103-1 | RCC1      | 0.316386279 mirna_pc |
| 21780 hsa-mir-103-1 | LIG1      | 0.376158428 mirna_pc |
| 21781 hsa-mir-103-1 | DTL       | 0.340803969 mirna_pc |
| 21782 hsa-mir-103-1 | EME1      | 0.317555884 mirna_pc |
| 21783 hsa-mir-103-1 | RECQL4    | 0.430770154 mirna_pc |
| 21784 hsa-mir-103-1 | AURKA     | 0.336353334 mirna_pc |
| 21785 hsa-mir-103-1 | CENPK     | 0.322998747 mirna_pc |
| 21786 hsa-mir-103-1 | AURKB     | 0.315374661 mirna_pc |
| 21787 hsa-mir-103-1 | CENPE     | 0.361811023 mirna_pc |
| 21788 hsa-mir-103-1 | KIF15     | 0.383253554 mirna_pc |
| 21789 hsa-mir-103-1 | CDCA3     | 0.343917616 mirna_pc |
| 21790 hsa-mir-103-1 | C1orf112  | 0.431049732 mirna_pc |
| 21791 hsa-mir-103-1 | GINS1     | 0.410913808 mirna_pc |
| 21792 hsa-mir-103-1 | FEN1      | 0.305809092 mirna_pc |
| 21793 hsa-mir-103-1 | TRAIP     | 0.365164627 mirna_pc |
| 21794 hsa-mir-103-1 | ORC6L     | 0.300688972 mirna_pc |
| 21795 hsa-mir-103-1 | C16orf59  | 0.317953102 mirna_pc |
| 21796 hsa-mir-103-1 | RAE1      | 0.398440957 mirna_pc |
| 21797 hsa-mir-103-1 | FAM72B    | 0.301007647 mirna_pc |
| 21798 hsa-mir-103-1 | EZH2      | 0.341006079 mirna_pc |
| 21799 hsa-mir-103-1 | NEIL3     | 0.336116133 mirna_pc |
| 21800 hsa-mir-103-1 | ACTL6A    | 0.301329992 mirna_pc |
| 21801 hsa-mir-103-1 | POLD1     | 0.338030836 mirna_pc |
| 21802 hsa-mir-103-1 | C12orf48  | 0.372266464 mirna_pc |
| 21803 hsa-mir-103-1 | HNRNPL    | 0.420365288 mirna_pc |
| 21804 hsa-mir-103-1 | TTK       | 0.391463639 mirna_pc |
| 21805 hsa-mir-103-1 | ZWINT     | 0.36112999 mirna_pc  |
| 21806 hsa-mir-103-1 | TUBA1B    | 0.302835009 mirna_pc |
| 21807 hsa-mir-103-1 | HOXC6     | 0.353231326 mirna_pc |
| 21808 hsa-mir-103-1 | BUB3      | 0.341450693 mirna_pc |
| 21809 hsa-mir-103-1 | HELLS     | 0.30734111 mirna_pc  |
| 21810 hsa-mir-103-1 | UBE2S     | 0.330032718 mirna_pc |
| 21811 hsa-mir-103-1 | NCAPD2    | 0.339986234 mirna_pc |
| 21812 hsa-mir-103-1 | HNRNPC    | 0.389179759 mirna_pc |
| 21813 hsa-mir-103-1 | ILF2      | 0.415021572 mirna_pc |
| 21814 hsa-mir-103-1 | C6orf167  | 0.32636992 mirna_pc  |
| 21815 hsa-mir-103-1 | HNRNPA2B1 | 0.436575016 mirna_pc |



|                     |          |                      |
|---------------------|----------|----------------------|
| 21816 hsa-mir-103-1 | TYMS     | 0.349094231 mirna_pc |
| 21817 hsa-mir-103-1 | MCM6     | 0.389335191 mirna_pc |
| 21818 hsa-mir-103-1 | EPR1     | 0.391192677 mirna_pc |
| 21819 hsa-mir-103-1 | PIF1     | 0.432812201 mirna_pc |
| 21820 hsa-mir-103-1 | SFRS2    | 0.394589354 mirna_pc |
| 21821 hsa-mir-103-1 | DCAF13   | 0.306904199 mirna_pc |
| 21822 hsa-mir-103-1 | UCK2     | 0.427241391 mirna_pc |
| 21823 hsa-mir-103-1 | NFKBIL2  | 0.456193179 mirna_pc |
| 21824 hsa-mir-103-1 | PTGES3   | 0.311433647 mirna_pc |
| 21825 hsa-mir-103-1 | FAM64A   | 0.367508337 mirna_pc |
| 21826 hsa-mir-103-1 | E2F1     | 0.328312237 mirna_pc |
| 21827 hsa-mir-103-1 | E2F2     | 0.336603824 mirna_pc |
| 21828 hsa-mir-103-1 | TH1L     | 0.341199752 mirna_pc |
| 21829 hsa-mir-103-1 | SNRPA    | 0.410359478 mirna_pc |
| 21830 hsa-mir-103-1 | FUS      | 0.439149112 mirna_pc |
| 21831 hsa-mir-103-1 | ATAD2    | 0.322375853 mirna_pc |
| 21832 hsa-mir-103-1 | U2AF2    | 0.355358363 mirna_pc |
| 21833 hsa-mir-103-1 | RFC3     | 0.352468772 mirna_pc |
| 21834 hsa-mir-103-1 | DEPDC1B  | 0.304736346 mirna_pc |
| 21835 hsa-mir-103-1 | ANP32E   | 0.357575298 mirna_pc |
| 21836 hsa-mir-103-1 | CENPO    | 0.349776581 mirna_pc |
| 21837 hsa-mir-103-1 | C19orf48 | 0.365328007 mirna_pc |
| 21838 hsa-mir-103-1 | CENPL    | 0.339832322 mirna_pc |
| 21839 hsa-mir-103-1 | HMGB2    | 0.427922522 mirna_pc |
| 21840 hsa-mir-103-1 | DNA2     | 0.353631108 mirna_pc |
| 21841 hsa-mir-103-1 | NOP56    | 0.464529285 mirna_pc |
| 21842 hsa-mir-103-1 | SNRPD1   | 0.329668582 mirna_pc |
| 21843 hsa-mir-103-1 | DSN1     | 0.342957656 mirna_pc |
| 21844 hsa-mir-103-1 | SNHG1    | 0.368840111 mirna_pc |
| 21845 hsa-mir-103-1 | CSE1L    | 0.320230907 mirna_pc |
| 21846 hsa-mir-103-1 | DTYMK    | 0.380990037 mirna_pc |
| 21847 hsa-mir-103-1 | PIGU     | 0.347174724 mirna_pc |
| 21848 hsa-mir-103-1 | PRMT1    | 0.341158957 mirna_pc |
| 21849 hsa-mir-103-1 | MLF1IP   | 0.361992076 mirna_pc |
| 21850 hsa-mir-103-1 | C16orf75 | 0.308903034 mirna_pc |
| 21851 hsa-mir-103-1 | PVT1     | 0.383346726 mirna_pc |
| 21852 hsa-mir-103-1 | CCDC99   | 0.317178881 mirna_pc |
| 21853 hsa-mir-103-1 | CDK2     | 0.321882913 mirna_pc |
| 21854 hsa-mir-103-1 | CDK4     | 0.330396311 mirna_pc |
| 21855 hsa-mir-103-1 | HOXA10   | 0.379502913 mirna_pc |
| 21856 hsa-mir-103-1 | HNRNPR   | 0.389417856 mirna_pc |
| 21857 hsa-mir-103-1 | DLEU2    | 0.313088141 mirna_pc |
| 21858 hsa-mir-103-1 | PRIM1    | 0.413548307 mirna_pc |
| 21859 hsa-mir-103-1 | KAT2A    | 0.340365972 mirna_pc |
| 21860 hsa-mir-103-1 | CENPH    | 0.357731207 mirna_pc |
| 21861 hsa-mir-103-1 | CHAF1B   | 0.404816741 mirna_pc |
| 21862 hsa-mir-103-1 | DHX34    | 0.338334068 mirna_pc |
| 21863 hsa-mir-103-1 | MSH2     | 0.467745408 mirna_pc |
| 21864 hsa-mir-103-1 | SF3B3    | 0.313934124 mirna_pc |
| 21865 hsa-mir-103-1 | CDC7     | 0.473616625 mirna_pc |
| 21866 hsa-mir-103-1 | SSB      | 0.318680434 mirna_pc |
| 21867 hsa-mir-103-1 | RFC4     | 0.337235967 mirna_pc |
| 21868 hsa-mir-103-1 | FBX05    | 0.456001171 mirna_pc |
| 21869 hsa-mir-103-1 | FIGNL1   | 0.363335112 mirna_pc |

|                     |              |                      |
|---------------------|--------------|----------------------|
| 21870 hsa-mir-103-1 | E2F3         | 0.324032717 mirna_pc |
| 21871 hsa-mir-103-1 | RUVBL2       | 0.330146095 mirna_pc |
| 21872 hsa-mir-103-1 | CDC25A       | 0.410702073 mirna_pc |
| 21873 hsa-mir-103-1 | RAD54B       | 0.319390787 mirna_pc |
| 21874 hsa-mir-103-1 | H2AFZ        | 0.404525618 mirna_pc |
| 21875 hsa-mir-103-1 | DDX12        | 0.390971888 mirna_pc |
| 21876 hsa-mir-103-1 | SMC2         | 0.328708104 mirna_pc |
| 21877 hsa-mir-103-1 | MCM8         | 0.424615938 mirna_pc |
| 21878 hsa-mir-103-1 | SNRPE        | 0.386707115 mirna_pc |
| 21879 hsa-mir-103-1 | C21orf45     | 0.498000545 mirna_pc |
| 21880 hsa-mir-103-1 | ATIC         | 0.320820849 mirna_pc |
| 21881 hsa-mir-103-1 | MARCKSL1     | 0.327733091 mirna_pc |
| 21882 hsa-mir-103-1 | ZNF207       | 0.339026599 mirna_pc |
| 21883 hsa-mir-103-1 | DAZAP1       | 0.300270655 mirna_pc |
| 21884 hsa-mir-103-1 | CBX8         | 0.441992053 mirna_pc |
| 21885 hsa-mir-103-1 | TRMT6        | 0.441580067 mirna_pc |
| 21886 hsa-mir-103-1 | GNPDA1       | 0.366345076 mirna_pc |
| 21887 hsa-mir-103-1 | TMEM201      | 0.37706524 mirna_pc  |
| 21888 hsa-mir-103-1 | NCL          | 0.342326276 mirna_pc |
| 21889 hsa-mir-103-1 | PAFAH1B3     | 0.365908772 mirna_pc |
| 21890 hsa-mir-103-1 | SRRT         | 0.34757297 mirna_pc  |
| 21891 hsa-mir-103-1 | CACYBP       | 0.410063037 mirna_pc |
| 21892 hsa-mir-103-1 | PSRC1        | 0.403298159 mirna_pc |
| 21893 hsa-mir-103-1 | POU2F1       | 0.331867178 mirna_pc |
| 21894 hsa-mir-103-1 | FBL          | 0.320308975 mirna_pc |
| 21895 hsa-mir-103-1 | HIST1H1E     | 0.364276804 mirna_pc |
| 21896 hsa-mir-103-1 | C13orf37     | 0.318992885 mirna_pc |
| 21897 hsa-mir-103-1 | EXOSC5       | 0.315651111 mirna_pc |
| 21898 hsa-mir-103-1 | HNRNPM       | 0.360827449 mirna_pc |
| 21899 hsa-mir-103-1 | TMPO         | 0.44442444 mirna_pc  |
| 21900 hsa-mir-103-1 | PRCC         | 0.337915983 mirna_pc |
| 21901 hsa-mir-103-1 | POLR2H       | 0.317702379 mirna_pc |
| 21902 hsa-mir-103-1 | C20orf72     | 0.378674523 mirna_pc |
| 21903 hsa-mir-103-1 | GPR19        | 0.443196242 mirna_pc |
| 21904 hsa-mir-103-1 | PPAT         | 0.362964107 mirna_pc |
| 21905 hsa-mir-103-1 | DHX9         | 0.354830221 mirna_pc |
| 21906 hsa-mir-103-1 | CCDC138      | 0.322117152 mirna_pc |
| 21907 hsa-mir-103-1 | LOC100128191 | 0.416529092 mirna_pc |
| 21908 hsa-mir-103-1 | HMGN2        | 0.364901431 mirna_pc |
| 21909 hsa-mir-103-1 | ETV4         | 0.301445567 mirna_pc |
| 21910 hsa-mir-103-1 | CHRNA5       | 0.309743683 mirna_pc |
| 21911 hsa-mir-103-1 | C20orf3      | 0.419228183 mirna_pc |
| 21912 hsa-mir-103-1 | SFRS1        | 0.378786117 mirna_pc |
| 21913 hsa-mir-103-1 | CDH24        | 0.314641651 mirna_pc |
| 21914 hsa-mir-103-1 | SKP2         | 0.362446892 mirna_pc |
| 21915 hsa-mir-103-1 | HSPBP1       | 0.346599528 mirna_pc |
| 21916 hsa-mir-103-1 | C4orf46      | 0.333615891 mirna_pc |
| 21917 hsa-mir-103-1 | RFC5         | 0.366066445 mirna_pc |
| 21918 hsa-mir-103-1 | SSRP1        | 0.304853663 mirna_pc |
| 21919 hsa-mir-103-1 | TIGD1        | 0.322939648 mirna_pc |
| 21920 hsa-mir-103-1 | SLBP         | 0.324416906 mirna_pc |
| 21921 hsa-mir-103-1 | FTSJ2        | 0.317840848 mirna_pc |
| 21922 hsa-mir-103-1 | KHDRBS1      | 0.456934544 mirna_pc |
| 21923 hsa-mir-103-1 | NXT1         | 0.370906292 mirna_pc |

|                     |          |                      |
|---------------------|----------|----------------------|
| 21924 hsa-mir-103-1 | C20orf27 | 0.41971151 mirna_pc  |
| 21925 hsa-mir-103-1 | TOMM34   | 0.324177469 mirna_pc |
| 21926 hsa-mir-103-1 | AHCY     | 0.309107269 mirna_pc |
| 21927 hsa-mir-103-1 | PARP1    | 0.354600345 mirna_pc |
| 21928 hsa-mir-103-1 | C4orf21  | 0.350230942 mirna_pc |
| 21929 hsa-mir-103-1 | TMEM194A | 0.334096282 mirna_pc |
| 21930 hsa-mir-103-1 | ZNF695   | 0.309925248 mirna_pc |
| 21931 hsa-mir-103-1 | HNRNPU   | 0.33442914 mirna_pc  |
| 21932 hsa-mir-103-1 | NASP     | 0.306623153 mirna_pc |
| 21933 hsa-mir-103-1 | POLR1B   | 0.30493358 mirna_pc  |
| 21934 hsa-mir-103-1 | OBFC2B   | 0.306973851 mirna_pc |
| 21935 hsa-mir-103-1 | PTMA     | 0.404033083 mirna_pc |
| 21936 hsa-mir-103-1 | WDR76    | 0.350813829 mirna_pc |
| 21937 hsa-mir-103-1 | ARHGAP39 | 0.338357612 mirna_pc |
| 21938 hsa-mir-103-1 | TBCE     | 0.351718427 mirna_pc |
| 21939 hsa-mir-103-1 | CLCN2    | 0.309088414 mirna_pc |
| 21940 hsa-mir-103-1 | SUV39H2  | 0.371142768 mirna_pc |
| 21941 hsa-mir-103-1 | HOXA9    | 0.342841164 mirna_pc |
| 21942 hsa-mir-103-1 | FANCL    | 0.410695922 mirna_pc |
| 21943 hsa-mir-103-1 | RIBC2    | 0.34393748 mirna_pc  |
| 21944 hsa-mir-103-1 | HNRNPD   | 0.443808163 mirna_pc |
| 21945 hsa-mir-103-1 | DPY30    | 0.324839339 mirna_pc |
| 21946 hsa-mir-103-1 | TARDBP   | 0.327488439 mirna_pc |
| 21947 hsa-mir-103-1 | SFRS3    | 0.386232638 mirna_pc |
| 21948 hsa-mir-103-1 | CCT4     | 0.326696327 mirna_pc |
| 21949 hsa-mir-103-1 | ELAVL1   | 0.331738155 mirna_pc |
| 21950 hsa-mir-103-1 | TBC1D7   | 0.306180717 mirna_pc |
| 21951 hsa-mir-103-1 | NUPL2    | 0.406489661 mirna_pc |
| 21952 hsa-mir-103-1 | PAK1IP1  | 0.375819091 mirna_pc |
| 21953 hsa-mir-103-1 | ILF3     | 0.377215597 mirna_pc |
| 21954 hsa-mir-103-1 | NT5DC2   | 0.331514132 mirna_pc |
| 21955 hsa-mir-103-1 | EHMT2    | 0.347226021 mirna_pc |
| 21956 hsa-mir-103-1 | HNRNPAB  | 0.322007611 mirna_pc |
| 21957 hsa-mir-103-1 | UBAP2L   | 0.321991877 mirna_pc |
| 21958 hsa-mir-103-1 | PUF60    | 0.344931428 mirna_pc |
| 21959 hsa-mir-103-1 | DEK      | 0.324565853 mirna_pc |
| 21960 hsa-mir-103-1 | SFRS9    | 0.302326866 mirna_pc |
| 21961 hsa-mir-103-1 | TRIB3    | 0.310614022 mirna_pc |
| 21962 hsa-mir-103-1 | CCNE2    | 0.371930983 mirna_pc |
| 21963 hsa-mir-103-1 | PDRG1    | 0.316117995 mirna_pc |
| 21964 hsa-mir-103-1 | PASK     | 0.384700453 mirna_pc |
| 21965 hsa-mir-103-1 | SAAL1    | 0.363372998 mirna_pc |
| 21966 hsa-mir-103-1 | LSM 6.00 | 0.332545834 mirna_pc |
| 21967 hsa-mir-103-1 | PRAME    | 0.38507244 mirna_pc  |
| 21968 hsa-mir-103-1 | SNRPB2   | 0.38753588 mirna_pc  |
| 21969 hsa-mir-103-1 | AZI1     | 0.329497615 mirna_pc |
| 21970 hsa-mir-103-1 | ITPA     | 0.338257473 mirna_pc |
| 21971 hsa-mir-103-1 | FUBP1    | 0.303192254 mirna_pc |
| 21972 hsa-mir-103-1 | IPO9     | 0.301771642 mirna_pc |
| 21973 hsa-mir-103-1 | HNRNPK   | 0.318419772 mirna_pc |
| 21974 hsa-mir-103-1 | CSRP2BP  | 0.362033135 mirna_pc |
| 21975 hsa-mir-103-1 | TRA2B    | 0.337809147 mirna_pc |
| 21976 hsa-mir-103-1 | CA8      | 0.323397393 mirna_pc |
| 21977 hsa-mir-103-1 | GAR1     | 0.428446784 mirna_pc |

|       |               |           |             |          |
|-------|---------------|-----------|-------------|----------|
| 21978 | hsa-mir-103-1 | LSM14B    | 0.347659845 | mirna_pc |
| 21979 | hsa-mir-103-1 | WHSC1     | 0.302577248 | mirna_pc |
| 21980 | hsa-mir-103-1 | SAE1      | 0.344202839 | mirna_pc |
| 21981 | hsa-mir-103-1 | ITGB3BP   | 0.314927816 | mirna_pc |
| 21982 | hsa-mir-103-1 | ENOPH1    | 0.35371587  | mirna_pc |
| 21983 | hsa-mir-103-1 | C17orf42  | 0.322640856 | mirna_pc |
| 21984 | hsa-mir-103-1 | TSEN54    | 0.306279236 | mirna_pc |
| 21985 | hsa-mir-103-1 | C4orf43   | 0.3043751   | mirna_pc |
| 21986 | hsa-mir-103-1 | DDX55     | 0.337176631 | mirna_pc |
| 21987 | hsa-mir-103-1 | CEP78     | 0.319531082 | mirna_pc |
| 21988 | hsa-mir-103-1 | RAD51L3   | 0.372984564 | mirna_pc |
| 21989 | hsa-mir-103-1 | PLEKHG4   | 0.366490361 | mirna_pc |
| 21990 | hsa-mir-103-1 | SFPQ      | 0.401534335 | mirna_pc |
| 21991 | hsa-mir-103-1 | RCOR2     | 0.301289744 | mirna_pc |
| 21992 | hsa-mir-103-1 | CADM1     | 0.314493176 | mirna_pc |
| 21993 | hsa-mir-103-1 | HDAC2     | 0.431704607 | mirna_pc |
| 21994 | hsa-mir-103-1 | TDRD5     | 0.308787258 | mirna_pc |
| 21995 | hsa-mir-103-1 | GMNN      | 0.341764183 | mirna_pc |
| 21996 | hsa-mir-103-1 | HAUS1     | 0.304064141 | mirna_pc |
| 21997 | hsa-mir-103-1 | POGK      | 0.302027991 | mirna_pc |
| 21998 | hsa-mir-103-1 | DCK       | 0.360630657 | mirna_pc |
| 21999 | hsa-mir-103-1 | COMMD5    | 0.305813048 | mirna_pc |
| 22000 | hsa-mir-103-1 | CRIP1     | 0.309485858 | mirna_pc |
| 22001 | hsa-mir-103-1 | MSH6      | 0.329264806 | mirna_pc |
| 22002 | hsa-mir-103-1 | XRN2      | 0.407324241 | mirna_pc |
| 22003 | hsa-mir-103-1 | SMC3      | 0.310874565 | mirna_pc |
| 22004 | hsa-mir-103-1 | HNRNPA1   | 0.359010937 | mirna_pc |
| 22005 | hsa-mir-103-1 | MEX3A     | 0.39799573  | mirna_pc |
| 22006 | hsa-mir-103-1 | BAT1      | 0.365516775 | mirna_pc |
| 22007 | hsa-mir-103-1 | COIL      | 0.313513956 | mirna_pc |
| 22008 | hsa-mir-103-1 | C12orf47  | 0.330365367 | mirna_pc |
| 22009 | hsa-mir-103-1 | IRAK1BP1  | 0.331432425 | mirna_pc |
| 22010 | hsa-mir-103-1 | TAF5      | 0.366033356 | mirna_pc |
| 22011 | hsa-mir-103-1 | C7orf30   | 0.308621966 | mirna_pc |
| 22012 | hsa-mir-103-1 | NANP      | 0.31004161  | mirna_pc |
| 22013 | hsa-mir-103-1 | CCDC28B   | 0.363093579 | mirna_pc |
| 22014 | hsa-mir-103-1 | SUZ12     | 0.332232231 | mirna_pc |
| 22015 | hsa-mir-103-1 | HNRNPA1L2 | 0.382275787 | mirna_pc |
| 22016 | hsa-mir-103-1 | HMGB1     | 0.358428695 | mirna_pc |
| 22017 | hsa-mir-103-1 | ZBTB12    | 0.402688575 | mirna_pc |
| 22018 | hsa-mir-103-1 | TADA1     | 0.378723996 | mirna_pc |
| 22019 | hsa-mir-103-1 | DUSP12    | 0.305991943 | mirna_pc |
| 22020 | hsa-mir-103-1 | TMEM68    | 0.312119167 | mirna_pc |
| 22021 | hsa-mir-103-1 | LOC642846 | 0.371341088 | mirna_pc |
| 22022 | hsa-mir-103-1 | TGIF2     | 0.374518943 | mirna_pc |
| 22023 | hsa-mir-103-1 | H3F3A     | 0.327071558 | mirna_pc |
| 22024 | hsa-mir-103-1 | CHERP     | 0.312753564 | mirna_pc |
| 22025 | hsa-mir-103-1 | SNX5      | 0.481699058 | mirna_pc |
| 22026 | hsa-mir-103-1 | RCN2      | 0.319858669 | mirna_pc |
| 22027 | hsa-mir-103-1 | TARBP2    | 0.323520378 | mirna_pc |
| 22028 | hsa-mir-103-1 | FGFR10P   | 0.349206819 | mirna_pc |
| 22029 | hsa-mir-103-1 | C12orf52  | 0.329096148 | mirna_pc |
| 22030 | hsa-mir-103-1 | NOL10     | 0.308428046 | mirna_pc |
| 22031 | hsa-mir-103-1 | POLE      | 0.355728221 | mirna_pc |

|       |               |          |             |          |
|-------|---------------|----------|-------------|----------|
| 22032 | hsa-mir-103-1 | WRNIP1   | 0.317636522 | mirna_pc |
| 22033 | hsa-mir-103-1 | EXOSC9   | 0.429875253 | mirna_pc |
| 22034 | hsa-mir-103-1 | KSR2     | 0.354349115 | mirna_pc |
| 22035 | hsa-mir-103-1 | UNG      | 0.322686491 | mirna_pc |
| 22036 | hsa-mir-103-1 | RBMX     | 0.437464248 | mirna_pc |
| 22037 | hsa-mir-103-1 | ALKBH2   | 0.392927007 | mirna_pc |
| 22038 | hsa-mir-103-1 | NTHL1    | 0.315843145 | mirna_pc |
| 22039 | hsa-mir-103-1 | PRKCSH   | 0.309678981 | mirna_pc |
| 22040 | hsa-mir-103-1 | XRCC5    | 0.340291669 | mirna_pc |
| 22041 | hsa-mir-103-1 | ASB3     | 0.370085496 | mirna_pc |
| 22042 | hsa-mir-103-1 | IGSF9    | 0.329575725 | mirna_pc |
| 22043 | hsa-mir-103-1 | FIP1L1   | 0.359229549 | mirna_pc |
| 22044 | hsa-mir-103-1 | C8orf55  | 0.318207211 | mirna_pc |
| 22045 | hsa-mir-103-1 | CIT      | 0.305756226 | mirna_pc |
| 22046 | hsa-mir-103-1 | SCLT1    | 0.318526891 | mirna_pc |
| 22047 | hsa-mir-103-1 | MAGEF1   | 0.335257705 | mirna_pc |
| 22048 | hsa-mir-103-1 | APIAR    | 0.300509712 | mirna_pc |
| 22049 | hsa-mir-103-1 | PCDHB8   | 0.307323629 | mirna_pc |
| 22050 | hsa-mir-103-1 | FAM136A  | 0.343176172 | mirna_pc |
| 22051 | hsa-mir-103-1 | SOX12    | 0.391278614 | mirna_pc |
| 22052 | hsa-mir-103-1 | UBXN11   | 0.326889854 | mirna_pc |
| 22053 | hsa-mir-103-1 | TTLL4    | 0.339577446 | mirna_pc |
| 22054 | hsa-mir-103-1 | ATXN7L2  | 0.346315332 | mirna_pc |
| 22055 | hsa-mir-103-1 | ZNF813   | 0.313592959 | mirna_pc |
| 22056 | hsa-mir-103-1 | CSNK2A1  | 0.370690549 | mirna_pc |
| 22057 | hsa-mir-103-1 | C7orf44  | 0.33105684  | mirna_pc |
| 22058 | hsa-mir-103-1 | ZNF286A  | 0.353989662 | mirna_pc |
| 22059 | hsa-mir-103-1 | SLC27A2  | 0.367332779 | mirna_pc |
| 22060 | hsa-mir-103-1 | PRPF38A  | 0.351710357 | mirna_pc |
| 22061 | hsa-mir-103-1 | WDR77    | 0.319463873 | mirna_pc |
| 22062 | hsa-mir-103-1 | NLE1     | 0.412705817 | mirna_pc |
| 22063 | hsa-mir-103-1 | ILKAP    | 0.34225333  | mirna_pc |
| 22064 | hsa-mir-103-1 | PRR3     | 0.320852232 | mirna_pc |
| 22065 | hsa-mir-103-1 | POLR3C   | 0.311780405 | mirna_pc |
| 22066 | hsa-mir-103-1 | TMEM106C | 0.354176666 | mirna_pc |
| 22067 | hsa-mir-103-1 | PANK2    | 0.3723153   | mirna_pc |
| 22068 | hsa-mir-103-1 | APITD1   | 0.314808367 | mirna_pc |
| 22069 | hsa-mir-103-1 | ZNF286B  | 0.33725028  | mirna_pc |
| 22070 | hsa-mir-103-1 | DDX20    | 0.32708574  | mirna_pc |
| 22071 | hsa-mir-103-1 | TCERG1   | 0.325074084 | mirna_pc |
| 22072 | hsa-mir-103-1 | SEC61A2  | 0.305629245 | mirna_pc |
| 22073 | hsa-mir-103-1 | PSPC1    | 0.427038264 | mirna_pc |
| 22074 | hsa-mir-103-1 | GDAP1    | 0.351568085 | mirna_pc |
| 22075 | hsa-mir-103-1 | CCNB1IP1 | 0.396964164 | mirna_pc |
| 22076 | hsa-mir-103-1 | MAPKAPK5 | 0.310388803 | mirna_pc |
| 22077 | hsa-mir-103-1 | GMCL1    | 0.327542714 | mirna_pc |
| 22078 | hsa-mir-103-1 | GPR3     | 0.310591863 | mirna_pc |
| 22079 | hsa-mir-103-1 | E2F6     | 0.363249267 | mirna_pc |
| 22080 | hsa-mir-103-1 | RHPN1    | 0.336674238 | mirna_pc |
| 22081 | hsa-mir-103-1 | B4GALT3  | 0.34012298  | mirna_pc |
| 22082 | hsa-mir-103-1 | SFRS13A  | 0.403925463 | mirna_pc |
| 22083 | hsa-mir-103-1 | SCLY     | 0.370446661 | mirna_pc |
| 22084 | hsa-mir-103-1 | SLC19A1  | 0.306106419 | mirna_pc |
| 22085 | hsa-mir-103-1 | TFAM     | 0.32518996  | mirna_pc |

|       |               |           |             |          |
|-------|---------------|-----------|-------------|----------|
| 22086 | hsa-mir-103-1 | DHRS13    | 0.445003317 | mirna_pc |
| 22087 | hsa-mir-103-1 | MCCC1     | 0.308159191 | mirna_pc |
| 22088 | hsa-mir-103-1 | ZNF613    | 0.313998718 | mirna_pc |
| 22089 | hsa-mir-103-1 | AAAS      | 0.309889282 | mirna_pc |
| 22090 | hsa-mir-103-1 | SATB2     | 0.332169209 | mirna_pc |
| 22091 | hsa-mir-103-1 | LIG3      | 0.366096349 | mirna_pc |
| 22092 | hsa-mir-103-1 | CABLES2   | 0.315747168 | mirna_pc |
| 22093 | hsa-mir-103-1 | MRPS26    | 0.477137021 | mirna_pc |
| 22094 | hsa-mir-103-1 | C8orf38   | 0.300358856 | mirna_pc |
| 22095 | hsa-mir-103-1 | ZNF692    | 0.349026699 | mirna_pc |
| 22096 | hsa-mir-103-1 | SFRS7     | 0.360248974 | mirna_pc |
| 22097 | hsa-mir-103-1 | CRNKL1    | 0.457930434 | mirna_pc |
| 22098 | hsa-mir-103-1 | CA5BP     | 0.313160674 | mirna_pc |
| 22099 | hsa-mir-103-1 | NFXL1     | 0.360486992 | mirna_pc |
| 22100 | hsa-mir-103-1 | CCDC78    | 0.326072959 | mirna_pc |
| 22101 | hsa-mir-103-1 | SARS2     | 0.31706474  | mirna_pc |
| 22102 | hsa-mir-103-1 | CDCA7L    | 0.318103041 | mirna_pc |
| 22103 | hsa-mir-103-1 | ZNF614    | 0.323429785 | mirna_pc |
| 22104 | hsa-mir-103-1 | HNRNPH1   | 0.349706316 | mirna_pc |
| 22105 | hsa-mir-103-1 | ZNF184    | 0.318730058 | mirna_pc |
| 22106 | hsa-mir-103-1 | RPA2      | 0.327532962 | mirna_pc |
| 22107 | hsa-mir-103-1 | ATF5      | 0.351929047 | mirna_pc |
| 22108 | hsa-mir-103-1 | C17orf75  | 0.423502217 | mirna_pc |
| 22109 | hsa-mir-103-1 | LOC147804 | 0.341332847 | mirna_pc |
| 22110 | hsa-mir-103-1 | YTHDF2    | 0.300767339 | mirna_pc |
| 22111 | hsa-mir-103-1 | BCAN      | 0.3189345   | mirna_pc |
| 22112 | hsa-mir-103-1 | C12orf10  | 0.323933042 | mirna_pc |
| 22113 | hsa-mir-103-1 | SEPHS1    | 0.357531208 | mirna_pc |
| 22114 | hsa-mir-103-1 | RMND1     | 0.352738409 | mirna_pc |
| 22115 | hsa-mir-103-1 | FASTKD5   | 0.358010837 | mirna_pc |
| 22116 | hsa-mir-103-1 | VASH2     | 0.314253101 | mirna_pc |
| 22117 | hsa-mir-103-1 | PHB2      | 0.310852386 | mirna_pc |
| 22118 | hsa-mir-103-1 | MYL6B     | 0.366770092 | mirna_pc |
| 22119 | hsa-mir-103-1 | TASP1     | 0.321567798 | mirna_pc |
| 22120 | hsa-mir-103-1 | ALG11     | 0.334993043 | mirna_pc |
| 22121 | hsa-mir-103-1 | RNF138    | 0.329239124 | mirna_pc |
| 22122 | hsa-mir-103-1 | ETV1      | 0.307794947 | mirna_pc |
| 22123 | hsa-mir-103-1 | MED28     | 0.409805296 | mirna_pc |
| 22124 | hsa-mir-103-1 | GPR137C   | 0.3915322   | mirna_pc |
| 22125 | hsa-mir-103-1 | NUP43     | 0.363749258 | mirna_pc |
| 22126 | hsa-mir-103-1 | POLR3F    | 0.377308683 | mirna_pc |
| 22127 | hsa-mir-103-1 | ZNF473    | 0.312480081 | mirna_pc |
| 22128 | hsa-mir-103-1 | COPS7B    | 0.316904393 | mirna_pc |
| 22129 | hsa-mir-103-1 | USP21     | 0.363386421 | mirna_pc |
| 22130 | hsa-mir-103-1 | DCLRE1A   | 0.390453656 | mirna_pc |
| 22131 | hsa-mir-103-1 | ANP32A    | 0.403189127 | mirna_pc |
| 22132 | hsa-mir-103-1 | PIH1D1    | 0.311614025 | mirna_pc |
| 22133 | hsa-mir-103-1 | GZF1      | 0.347952308 | mirna_pc |
| 22134 | hsa-mir-103-1 | ZNF696    | 0.31017727  | mirna_pc |
| 22135 | hsa-mir-103-1 | C2orf16   | 0.324996952 | mirna_pc |
| 22136 | hsa-mir-103-1 | HTATSF1   | 0.343007485 | mirna_pc |
| 22137 | hsa-mir-103-1 | ENTPD6    | 0.35352475  | mirna_pc |
| 22138 | hsa-mir-103-1 | PPP5C     | 0.404738649 | mirna_pc |
| 22139 | hsa-mir-103-1 | NAP1L1    | 0.308011904 | mirna_pc |

|       |               |          |             |          |
|-------|---------------|----------|-------------|----------|
| 22140 | hsa-mir-103-1 | PEX5     | 0.333928226 | mirna_pc |
| 22141 | hsa-mir-103-1 | Clorf156 | 0.332788708 | mirna_pc |
| 22142 | hsa-mir-103-1 | NSL1     | 0.366915487 | mirna_pc |
| 22143 | hsa-mir-103-1 | IQCC     | 0.389505981 | mirna_pc |
| 22144 | hsa-mir-103-1 | LRRC37B  | 0.346993925 | mirna_pc |
| 22145 | hsa-mir-103-1 | HNRNPA0  | 0.312175502 | mirna_pc |
| 22146 | hsa-mir-103-1 | MNS1     | 0.33887251  | mirna_pc |
| 22147 | hsa-mir-103-1 | KIAA1467 | 0.35439211  | mirna_pc |
| 22148 | hsa-mir-103-1 | C14orf93 | 0.307334008 | mirna_pc |
| 22149 | hsa-mir-103-1 | DCAF16   | 0.378492808 | mirna_pc |
| 22150 | hsa-mir-103-1 | SBK1     | 0.370172877 | mirna_pc |
| 22151 | hsa-mir-103-1 | ABCA11P  | 0.351033047 | mirna_pc |
| 22152 | hsa-mir-103-1 | GLS2     | 0.325825242 | mirna_pc |
| 22153 | hsa-mir-103-1 | USP13    | 0.335374509 | mirna_pc |
| 22154 | hsa-mir-103-1 | ESF1     | 0.331585894 | mirna_pc |
| 22155 | hsa-mir-103-1 | SLC25A33 | 0.447155331 | mirna_pc |
| 22156 | hsa-mir-103-1 | BNIP1    | 0.312419028 | mirna_pc |
| 22157 | hsa-mir-103-1 | PACRGL   | 0.322650667 | mirna_pc |
| 22158 | hsa-mir-103-1 | ZNF232   | 0.395673765 | mirna_pc |
| 22159 | hsa-mir-103-1 | ENO3     | 0.410359208 | mirna_pc |
| 22160 | hsa-mir-103-1 | CYCS     | 0.314882629 | mirna_pc |
| 22161 | hsa-mir-103-1 | ALDH5A1  | 0.340020149 | mirna_pc |
| 22162 | hsa-mir-103-1 | C20orf12 | 0.315927849 | mirna_pc |
| 22163 | hsa-mir-103-1 | ZBTB24   | 0.323976745 | mirna_pc |
| 22164 | hsa-mir-103-1 | RBBP4    | 0.451769074 | mirna_pc |
| 22165 | hsa-mir-103-1 | ZNF761   | 0.37025418  | mirna_pc |
| 22166 | hsa-mir-103-1 | CYC1     | 0.309486451 | mirna_pc |
| 22167 | hsa-mir-103-1 | FAM105A  | 0.300803873 | mirna_pc |
| 22168 | hsa-mir-103-1 | MKKS     | 0.305675014 | mirna_pc |
| 22169 | hsa-mir-103-1 | ZNF664   | 0.306498781 | mirna_pc |
| 22170 | hsa-mir-103-1 | LRDD     | 0.323231398 | mirna_pc |
| 22171 | hsa-mir-103-1 | C20orf96 | 0.417821602 | mirna_pc |
| 22172 | hsa-mir-103-1 | STK35    | 0.304616507 | mirna_pc |
| 22173 | hsa-mir-103-1 | ZCCHC3   | 0.513182843 | mirna_pc |
| 22174 | hsa-mir-103-1 | ETV5     | 0.326661856 | mirna_pc |
| 22175 | hsa-mir-103-1 | AADAT    | 0.392129513 | mirna_pc |
| 22176 | hsa-mir-103-1 | ACP1     | 0.30923657  | mirna_pc |
| 22177 | hsa-mir-103-1 | DACH1    | 0.329134927 | mirna_pc |
| 22178 | hsa-mir-103-1 | ZNF883   | 0.324970204 | mirna_pc |
| 22179 | hsa-mir-103-1 | RFX3     | 0.362708481 | mirna_pc |
| 22180 | hsa-mir-103-1 | CD320    | 0.306976263 | mirna_pc |
| 22181 | hsa-mir-103-1 | SERF1A   | 0.334149365 | mirna_pc |
| 22182 | hsa-mir-103-1 | PRMT6    | 0.32953764  | mirna_pc |
| 22183 | hsa-mir-103-1 | IDH3B    | 0.441439161 | mirna_pc |
| 22184 | hsa-mir-103-1 | BAI2     | 0.338925222 | mirna_pc |
| 22185 | hsa-mir-103-1 | C20orf30 | 0.33088935  | mirna_pc |
| 22186 | hsa-mir-103-1 | MPP6     | 0.396922839 | mirna_pc |
| 22187 | hsa-mir-103-1 | DDRCK1   | 0.335775367 | mirna_pc |
| 22188 | hsa-mir-103-1 | C20orf7  | 0.465224519 | mirna_pc |
| 22189 | hsa-mir-103-1 | FAM113A  | 0.303096341 | mirna_pc |
| 22190 | hsa-mir-103-1 | VPS16    | 0.369086659 | mirna_pc |
| 22191 | hsa-mir-103-1 | C12orf73 | 0.304278322 | mirna_pc |
| 22192 | hsa-mir-103-1 | RBBP9    | 0.305066269 | mirna_pc |
| 22193 | hsa-mir-103-1 | ZNF326   | 0.306153754 | mirna_pc |

|                     |              |                      |
|---------------------|--------------|----------------------|
| 22194 hsa-mir-103-1 | DOM3Z        | 0.313054921 mirna_pc |
| 22195 hsa-mir-106a  | HOXC9        | 0.309575377 mirna_pc |
| 22196 hsa-mir-106a  | ACADSB       | 0.430468606 mirna_pc |
| 22197 hsa-mir-106a  | ZNF415       | 0.360615288 mirna_pc |
| 22198 hsa-mir-106a  | FABP3        | 0.348196253 mirna_pc |
| 22199 hsa-mir-106a  | TIMELESS     | 0.312436244 mirna_pc |
| 22200 hsa-mir-106a  | ZNF542       | 0.31396554 mirna_pc  |
| 22201 hsa-mir-106a  | SKA1         | 0.376459684 mirna_pc |
| 22202 hsa-mir-106a  | ZNF229       | 0.400799145 mirna_pc |
| 22203 hsa-mir-106a  | C12orf48     | 0.303609573 mirna_pc |
| 22204 hsa-mir-106a  | HOXC6        | 0.300215313 mirna_pc |
| 22205 hsa-mir-106a  | CDKN1C       | 0.303712038 mirna_pc |
| 22206 hsa-mir-106a  | DNAJC6       | 0.430515606 mirna_pc |
| 22207 hsa-mir-106a  | C5           | 0.557374958 mirna_pc |
| 22208 hsa-mir-106a  | CDK2         | 0.315310552 mirna_pc |
| 22209 hsa-mir-106a  | ZBED3        | 0.333958189 mirna_pc |
| 22210 hsa-mir-106a  | PRIM1        | 0.485832516 mirna_pc |
| 22211 hsa-mir-106a  | SALL4        | 0.357480679 mirna_pc |
| 22212 hsa-mir-106a  | MCM8         | 0.341185067 mirna_pc |
| 22213 hsa-mir-106a  | TRMT6        | 0.314270006 mirna_pc |
| 22214 hsa-mir-106a  | PAFAH1B3     | 0.31604259 mirna_pc  |
| 22215 hsa-mir-106a  | TMPO         | 0.36595241 mirna_pc  |
| 22216 hsa-mir-106a  | GPR19        | 0.314525903 mirna_pc |
| 22217 hsa-mir-106a  | LOC100128191 | 0.480386875 mirna_pc |
| 22218 hsa-mir-106a  | PHF6         | 0.343076361 mirna_pc |
| 22219 hsa-mir-106a  | TMEM170B     | 0.310939536 mirna_pc |
| 22220 hsa-mir-106a  | FZD2         | 0.303586113 mirna_pc |
| 22221 hsa-mir-106a  | BSN          | 0.304596744 mirna_pc |
| 22222 hsa-mir-106a  | SLC5A6       | 0.310590522 mirna_pc |
| 22223 hsa-mir-106a  | TMEM194A     | 0.314325708 mirna_pc |
| 22224 hsa-mir-106a  | C10orf4      | 0.31047275 mirna_pc  |
| 22225 hsa-mir-106a  | CBX4         | 0.367130853 mirna_pc |
| 22226 hsa-mir-106a  | OBFC2B       | 0.300060047 mirna_pc |
| 22227 hsa-mir-106a  | SCARB1       | 0.31082826 mirna_pc  |
| 22228 hsa-mir-106a  | TMEM86B      | 0.398492799 mirna_pc |
| 22229 hsa-mir-106a  | TFR2         | 0.554397257 mirna_pc |
| 22230 hsa-mir-106a  | SAT2         | 0.337192241 mirna_pc |
| 22231 hsa-mir-106a  | APOE         | 0.35261171 mirna_pc  |
| 22232 hsa-mir-106a  | DUSP9        | 0.554314938 mirna_pc |
| 22233 hsa-mir-106a  | TRIB3        | 0.366656266 mirna_pc |
| 22234 hsa-mir-106a  | PPP2R1B      | 0.403303811 mirna_pc |
| 22235 hsa-mir-106a  | PRAME        | 0.395650365 mirna_pc |
| 22236 hsa-mir-106a  | CSRP2BP      | 0.374771884 mirna_pc |
| 22237 hsa-mir-106a  | SAE1         | 0.375028602 mirna_pc |
| 22238 hsa-mir-106a  | C17orf42     | 0.308785367 mirna_pc |
| 22239 hsa-mir-106a  | DDX55        | 0.313043462 mirna_pc |
| 22240 hsa-mir-106a  | RAD51L3      | 0.396588472 mirna_pc |
| 22241 hsa-mir-106a  | ITIH4        | 0.493778096 mirna_pc |
| 22242 hsa-mir-106a  | CADM1        | 0.306172125 mirna_pc |
| 22243 hsa-mir-106a  | GMNN         | 0.410141427 mirna_pc |
| 22244 hsa-mir-106a  | KPNB1        | 0.323380057 mirna_pc |
| 22245 hsa-mir-106a  | CAPS         | 0.328444529 mirna_pc |
| 22246 hsa-mir-106a  | SMARCA1      | 0.527542557 mirna_pc |
| 22247 hsa-mir-106a  | GPAM         | 0.368183681 mirna_pc |



|                    |                 |                      |
|--------------------|-----------------|----------------------|
| 22248 hsa-mir-106a | LOC651250       | 0.300544693 mirna_pc |
| 22249 hsa-mir-106a | COIL            | 0.335752418 mirna_pc |
| 22250 hsa-mir-106a | TRIM28          | 0.300169584 mirna_pc |
| 22251 hsa-mir-106a | ZNF444          | 0.390838665 mirna_pc |
| 22252 hsa-mir-106a | ZBTB12          | 0.347628538 mirna_pc |
| 22253 hsa-mir-106a | SLC26A1         | 0.323038169 mirna_pc |
| 22254 hsa-mir-106a | PIK3AP1         | 0.402521704 mirna_pc |
| 22255 hsa-mir-106a | USP30           | 0.325042702 mirna_pc |
| 22256 hsa-mir-106a | POLE            | 0.309710176 mirna_pc |
| 22257 hsa-mir-106a | ZKSCAN2         | 0.381858361 mirna_pc |
| 22258 hsa-mir-106a | GAL3ST1         | 0.387873694 mirna_pc |
| 22259 hsa-mir-106a | RTN4RL2         | 0.384877339 mirna_pc |
| 22260 hsa-mir-106a | FOXRED2         | 0.432145212 mirna_pc |
| 22261 hsa-mir-106a | RBMX            | 0.322665282 mirna_pc |
| 22262 hsa-mir-106a | GPC3            | 0.692735554 mirna_pc |
| 22263 hsa-mir-106a | STXBP4          | 0.359144563 mirna_pc |
| 22264 hsa-mir-106a | DNAJC14         | 0.319370729 mirna_pc |
| 22265 hsa-mir-106a | LYPD1           | 0.498793274 mirna_pc |
| 22266 hsa-mir-106a | SOX12           | 0.3617954 mirna_pc   |
| 22267 hsa-mir-106a | ZNF230          | 0.313059162 mirna_pc |
| 22268 hsa-mir-106a | ARID3A          | 0.340178419 mirna_pc |
| 22269 hsa-mir-106a | APOM            | 0.375723574 mirna_pc |
| 22270 hsa-mir-106a | PGAM2           | 0.354320648 mirna_pc |
| 22271 hsa-mir-106a | BCL7A           | 0.324013751 mirna_pc |
| 22272 hsa-mir-106a | TMEM98          | 0.359659227 mirna_pc |
| 22273 hsa-mir-106a | SLC27A2         | 0.315373438 mirna_pc |
| 22274 hsa-mir-106a | FRAT1           | 0.418958559 mirna_pc |
| 22275 hsa-mir-106a | HNF1B           | 0.347245279 mirna_pc |
| 22276 hsa-mir-106a | SLC46A1         | 0.305121255 mirna_pc |
| 22277 hsa-mir-106a | FMO1            | 0.310390741 mirna_pc |
| 22278 hsa-mir-106a | GYG2            | 0.312701017 mirna_pc |
| 22279 hsa-mir-106a | ZNF286B         | 0.318461533 mirna_pc |
| 22280 hsa-mir-106a | RNF34           | 0.33417112 mirna_pc  |
| 22281 hsa-mir-106a | GMCL1           | 0.40603276 mirna_pc  |
| 22282 hsa-mir-106a | E2F6            | 0.31540976 mirna_pc  |
| 22283 hsa-mir-106a | ZNF833          | 0.427280792 mirna_pc |
| 22284 hsa-mir-106a | ZNF222          | 0.354986333 mirna_pc |
| 22285 hsa-mir-106a | HUNK            | 0.338627989 mirna_pc |
| 22286 hsa-mir-106a | FIZ1            | 0.309905044 mirna_pc |
| 22287 hsa-mir-106a | TFAM            | 0.317209849 mirna_pc |
| 22288 hsa-mir-106a | FAM122B         | 0.328266902 mirna_pc |
| 22289 hsa-mir-106a | LOC222699       | 0.421381907 mirna_pc |
| 22290 hsa-mir-106a | NLGN4X          | 0.303016926 mirna_pc |
| 22291 hsa-mir-106a | HHEX            | 0.373172545 mirna_pc |
| 22292 hsa-mir-106a | SMUG1           | 0.358582265 mirna_pc |
| 22293 hsa-mir-106a | C6orf147        | 0.352854678 mirna_pc |
| 22294 hsa-mir-106a | METTL7B         | 0.328382374 mirna_pc |
| 22295 hsa-mir-106a | PHKA2           | 0.306208947 mirna_pc |
| 22296 hsa-mir-106a | SERPINF2        | 0.578252113 mirna_pc |
| 22297 hsa-mir-106a | CA5BP           | 0.354875004 mirna_pc |
| 22298 hsa-mir-106a | C19orf57        | 0.377985245 mirna_pc |
| 22299 hsa-mir-106a | VPS33A          | 0.317790507 mirna_pc |
| 22300 hsa-mir-106a | ZNF184          | 0.300943554 mirna_pc |
| 22301 hsa-mir-106a | LIMS3-LOC440895 | 0.360942723 mirna_pc |

|                    |           |                      |
|--------------------|-----------|----------------------|
| 22302 hsa-mir-106a | ATF5      | 0.358489781 mirna_pc |
| 22303 hsa-mir-106a | AKAP7     | 0.378932177 mirna_pc |
| 22304 hsa-mir-106a | IRF2BP1   | 0.327718765 mirna_pc |
| 22305 hsa-mir-106a | GGT1      | 0.37106832 mirna_pc  |
| 22306 hsa-mir-106a | POLR3B    | 0.314602192 mirna_pc |
| 22307 hsa-mir-106a | C17orf75  | 0.306054946 mirna_pc |
| 22308 hsa-mir-106a | ZNF180    | 0.3429807 mirna_pc   |
| 22309 hsa-mir-106a | CEBPA     | 0.423424505 mirna_pc |
| 22310 hsa-mir-106a | LOC147804 | 0.3357606 mirna_pc   |
| 22311 hsa-mir-106a | FUZ       | 0.317857622 mirna_pc |
| 22312 hsa-mir-106a | SLC43A3   | 0.364866218 mirna_pc |
| 22313 hsa-mir-106a | ZNF45     | 0.444031577 mirna_pc |
| 22314 hsa-mir-106a | ANXA9     | 0.50305542 mirna_pc  |
| 22315 hsa-mir-106a | MAK16     | 0.300337961 mirna_pc |
| 22316 hsa-mir-106a | ZNF498    | 0.381113613 mirna_pc |
| 22317 hsa-mir-106a | MCCC2     | 0.300100469 mirna_pc |
| 22318 hsa-mir-106a | ZNF233    | 0.372130318 mirna_pc |
| 22319 hsa-mir-106a | GPR137C   | 0.367745348 mirna_pc |
| 22320 hsa-mir-106a | NUP43     | 0.303068122 mirna_pc |
| 22321 hsa-mir-106a | SMAD5     | 0.301790082 mirna_pc |
| 22322 hsa-mir-106a | DDIT3     | 0.325605329 mirna_pc |
| 22323 hsa-mir-106a | ZNF124    | 0.304795826 mirna_pc |
| 22324 hsa-mir-106a | ZNF611    | 0.343736977 mirna_pc |
| 22325 hsa-mir-106a | ZNF473    | 0.422230518 mirna_pc |
| 22326 hsa-mir-106a | ZNF544    | 0.340719904 mirna_pc |
| 22327 hsa-mir-106a | DCLRE1A   | 0.37245785 mirna_pc  |
| 22328 hsa-mir-106a | SEPHS2    | 0.359190137 mirna_pc |
| 22329 hsa-mir-106a | PPP5C     | 0.369745308 mirna_pc |
| 22330 hsa-mir-106a | ZNF227    | 0.355848367 mirna_pc |
| 22331 hsa-mir-106a | PROC      | 0.390919471 mirna_pc |
| 22332 hsa-mir-106a | SLC26A11  | 0.323405676 mirna_pc |
| 22333 hsa-mir-106a | NLRP2     | 0.36105103 mirna_pc  |
| 22334 hsa-mir-106a | SERPINA1  | 0.311731567 mirna_pc |
| 22335 hsa-mir-106a | PHF16     | 0.34481482 mirna_pc  |
| 22336 hsa-mir-106a | BUD13     | 0.30531342 mirna_pc  |
| 22337 hsa-mir-106a | LOC400657 | 0.317517107 mirna_pc |
| 22338 hsa-mir-106a | MANEAL    | 0.332707753 mirna_pc |
| 22339 hsa-mir-106a | MBNL3     | 0.374118032 mirna_pc |
| 22340 hsa-mir-106a | LRRC37B   | 0.317439019 mirna_pc |
| 22341 hsa-mir-106a | FOXA2     | 0.330889716 mirna_pc |
| 22342 hsa-mir-106a | C10orf137 | 0.324028366 mirna_pc |
| 22343 hsa-mir-106a | TRIM24    | 0.328399174 mirna_pc |
| 22344 hsa-mir-106a | ABCC4     | 0.306612579 mirna_pc |
| 22345 hsa-mir-106a | C7orf13   | 0.348845981 mirna_pc |
| 22346 hsa-mir-106a | ACE2      | 0.39875248 mirna_pc  |
| 22347 hsa-mir-106a | GTF2H2C   | 0.37984814 mirna_pc  |
| 22348 hsa-mir-106a | NUDT17    | 0.445969261 mirna_pc |
| 22349 hsa-mir-106a | C2orf72   | 0.436830738 mirna_pc |
| 22350 hsa-mir-106a | GXYLT1    | 0.374612585 mirna_pc |
| 22351 hsa-mir-106a | ZBTB39    | 0.324036015 mirna_pc |
| 22352 hsa-mir-106a | ENO3      | 0.366690419 mirna_pc |
| 22353 hsa-mir-106a | ALDH5A1   | 0.316442663 mirna_pc |
| 22354 hsa-mir-106a | FAM169A   | 0.343506747 mirna_pc |
| 22355 hsa-mir-106a | ID2       | 0.357130753 mirna_pc |

|       |              |           |                   |          |
|-------|--------------|-----------|-------------------|----------|
| 22356 | hsa-mir-106a | HSD17B14  | 0.365177232       | mirna_pc |
| 22357 | hsa-mir-106a | PLGLB2    | 0.462121094       | mirna_pc |
| 22358 | hsa-mir-106a | LASS2     | 0.300248876       | mirna_pc |
| 22359 | hsa-mir-106a | ZNF550    | 0.31774187        | mirna_pc |
| 22360 | hsa-mir-106a | ZNF664    | 0.363579859       | mirna_pc |
| 22361 | hsa-mir-106a | PECR      | 0.466371821       | mirna_pc |
| 22362 | hsa-mir-106a | LRDD      | 0.314724605       | mirna_pc |
| 22363 | hsa-mir-106a | CSPP1     | 0.339523238       | mirna_pc |
| 22364 | hsa-mir-106a | SCML2     | 0.305336564       | mirna_pc |
| 22365 | hsa-mir-106a | ZCCHC3    | 0.522792871       | mirna_pc |
| 22366 | hsa-mir-106a | KLHL29    | 0.415187541       | mirna_pc |
| 22367 | hsa-mir-106a | PROX1     | 0.336209491       | mirna_pc |
| 22368 | hsa-mir-106a | DACT2     | 0.326031784       | mirna_pc |
| 22369 | hsa-mir-106a | AADAT     | 0.338618207       | mirna_pc |
| 22370 | hsa-mir-106a | FRAS1     | 0.466833745       | mirna_pc |
| 22371 | hsa-mir-106a | LOC80054  | 0.469000295       | mirna_pc |
| 22372 | hsa-mir-106a | ZNF772    | 0.358916221       | mirna_pc |
| 22373 | hsa-mir-106a | PNKD      | 0.354343766       | mirna_pc |
| 22374 | hsa-mir-106a | ZNF530    | 0.343531195       | mirna_pc |
| 22375 | hsa-mir-106a | TMEM97    | 0.349551927       | mirna_pc |
| 22376 | hsa-mir-106a | BMF       | 0.340768689       | mirna_pc |
| 22377 | hsa-mir-106a | MBD6      | 0.306436147       | mirna_pc |
| 22378 | hsa-mir-106a | ELP3      | 0.326012235       | mirna_pc |
| 22379 | hsa-mir-106a | C20orf30  | 0.362111945       | mirna_pc |
| 22380 | hsa-mir-106a | AGT       | 0.457423969       | mirna_pc |
| 22381 | hsa-mir-106a | MPP6      | 0.405324701       | mirna_pc |
| 22382 | hsa-mir-106a |           | 9-Mar 0.307016017 | mirna_pc |
| 22383 | hsa-mir-106a | ZNF468    | 0.330892054       | mirna_pc |
| 22384 | hsa-mir-106a | SLC37A4   | 0.379842928       | mirna_pc |
| 22385 | hsa-mir-106a | NRSN2     | 0.321613026       | mirna_pc |
| 22386 | hsa-mir-106a | MGC57346  | 0.307951361       | mirna_pc |
| 22387 | hsa-mir-106a | ZNF343    | 0.380877264       | mirna_pc |
| 22388 | hsa-mir-409  | BUB1B     | 0.311981392       | mirna_pc |
| 22389 | hsa-mir-409  | KIF2C     | 0.363192056       | mirna_pc |
| 22390 | hsa-mir-409  | CDC20     | 0.343894404       | mirna_pc |
| 22391 | hsa-mir-409  | CLSPN     | 0.322476205       | mirna_pc |
| 22392 | hsa-mir-409  | DLGAP5    | 0.306124846       | mirna_pc |
| 22393 | hsa-mir-409  | PLK4      | 0.339789521       | mirna_pc |
| 22394 | hsa-mir-409  | BIRC5     | 0.300331387       | mirna_pc |
| 22395 | hsa-mir-409  | AURKB     | 0.303288235       | mirna_pc |
| 22396 | hsa-mir-409  | HBB       | 0.443007412       | mirna_pc |
| 22397 | hsa-mir-409  | SERPINH1  | 0.376679813       | mirna_pc |
| 22398 | hsa-mir-409  | ZNF167    | 0.302997019       | mirna_pc |
| 22399 | hsa-mir-409  | CDK2      | 0.304924101       | mirna_pc |
| 22400 | hsa-mir-409  | MEG3      | 0.793371657       | mirna_pc |
| 22401 | hsa-mir-409  | BMP1      | 0.384128698       | mirna_pc |
| 22402 | hsa-mir-409  | C17orf107 | 0.309466639       | mirna_pc |
| 22403 | hsa-mir-409  | TRAF3     | 0.342508838       | mirna_pc |
| 22404 | hsa-mir-409  | DNMT3B    | 0.41388305        | mirna_pc |
| 22405 | hsa-mir-409  | PA2G4     | 0.316121809       | mirna_pc |
| 22406 | hsa-mir-409  | CCNE1     | 0.306381364       | mirna_pc |
| 22407 | hsa-mir-409  | NEDD1     | 0.317943874       | mirna_pc |
| 22408 | hsa-mir-409  | LOXL2     | 0.337255609       | mirna_pc |
| 22409 | hsa-mir-409  | LEPRE1    | 0.337652367       | mirna_pc |

|                   |           |                      |
|-------------------|-----------|----------------------|
| 22410 hsa-mir-409 | IKBIP     | 0.333660138 mirna_pc |
| 22411 hsa-mir-409 | EHMT2     | 0.309622562 mirna_pc |
| 22412 hsa-mir-409 | FHOD1     | 0.371971314 mirna_pc |
| 22413 hsa-mir-409 | C14orf145 | 0.314834056 mirna_pc |
| 22414 hsa-mir-409 | MFAP2     | 0.316270494 mirna_pc |
| 22415 hsa-mir-409 | CD276     | 0.314339277 mirna_pc |
| 22416 hsa-mir-409 | BCL2A1    | 0.307559818 mirna_pc |
| 22417 hsa-mir-409 | ZNF788    | 0.302759007 mirna_pc |
| 22418 hsa-mir-409 | SLC2A6    | 0.309397348 mirna_pc |
| 22419 hsa-mir-409 | COL4A1    | 0.309758897 mirna_pc |
| 22420 hsa-mir-409 | PA2G4P4   | 0.311745901 mirna_pc |
| 22421 hsa-mir-409 | NKIRAS2   | 0.309835508 mirna_pc |
| 22422 hsa-mir-409 | MEX3A     | 0.361747692 mirna_pc |
| 22423 hsa-mir-409 | ACAN      | 0.561949754 mirna_pc |
| 22424 hsa-mir-409 | COL27A1   | 0.302769982 mirna_pc |
| 22425 hsa-mir-409 | C16orf70  | 0.357717194 mirna_pc |
| 22426 hsa-mir-409 | FCGR2A    | 0.324058642 mirna_pc |
| 22427 hsa-mir-409 | CHN1      | 0.323120426 mirna_pc |
| 22428 hsa-mir-409 | SC65      | 0.337139153 mirna_pc |
| 22429 hsa-mir-409 | PXDN      | 0.35472467 mirna_pc  |
| 22430 hsa-mir-409 | SPON2     | 0.317650495 mirna_pc |
| 22431 hsa-mir-409 | ENPEP     | 0.325568702 mirna_pc |
| 22432 hsa-mir-409 | NID2      | 0.316307325 mirna_pc |
| 22433 hsa-mir-409 | GDPD5     | 0.349619595 mirna_pc |
| 22434 hsa-mir-409 | SNORA8    | 0.359894925 mirna_pc |
| 22435 hsa-mir-409 | LOC401010 | 0.318832153 mirna_pc |
| 22436 hsa-mir-409 | CHSY3     | 0.442171485 mirna_pc |
| 22437 hsa-mir-409 | ADAMTS7   | 0.316207074 mirna_pc |
| 22438 hsa-mir-409 | NID1      | 0.366790003 mirna_pc |
| 22439 hsa-mir-409 | NAT9      | 0.31719251 mirna_pc  |
| 22440 hsa-mir-409 | KIAA1731  | 0.326231233 mirna_pc |
| 22441 hsa-mir-409 | PANX1     | 0.374826006 mirna_pc |
| 22442 hsa-mir-409 | C5orf13   | 0.313606429 mirna_pc |
| 22443 hsa-mir-409 | FKBP10    | 0.335571417 mirna_pc |
| 22444 hsa-mir-409 | PCDHB5    | 0.365313319 mirna_pc |
| 22445 hsa-mir-409 | LDLRAD3   | 0.316229434 mirna_pc |
| 22446 hsa-mir-409 | PRR16     | 0.326113894 mirna_pc |
| 22447 hsa-mir-409 | RDBP      | 0.317386982 mirna_pc |
| 22448 hsa-mir-409 | LY86      | 0.401483342 mirna_pc |
| 22449 hsa-mir-409 | EDNRA     | 0.330596625 mirna_pc |
| 22450 hsa-mir-409 | ZNF697    | 0.34972078 mirna_pc  |
| 22451 hsa-mir-409 | ZFHX4     | 0.32291503 mirna_pc  |
| 22452 hsa-mir-409 | GPX7      | 0.354675886 mirna_pc |
| 22453 hsa-mir-409 | EIF2B3    | 0.323680165 mirna_pc |
| 22454 hsa-mir-409 | RNF41     | 0.342749124 mirna_pc |
| 22455 hsa-mir-409 | GGCX      | 0.312397275 mirna_pc |
| 22456 hsa-mir-409 | EGFLAM    | 0.435294255 mirna_pc |
| 22457 hsa-mir-409 | GLT8D1    | 0.330852132 mirna_pc |
| 22458 hsa-mir-409 | NLRP3     | 0.310375535 mirna_pc |
| 22459 hsa-mir-409 | ESYT1     | 0.30731714 mirna_pc  |
| 22460 hsa-mir-409 | C9orf84   | 0.40572509 mirna_pc  |
| 22461 hsa-mir-409 | BCAT1     | 0.3799275 mirna_pc   |
| 22462 hsa-mir-409 | N4BP2     | 0.324609623 mirna_pc |
| 22463 hsa-mir-409 | PBX2      | 0.320505577 mirna_pc |

|                   |           |                      |
|-------------------|-----------|----------------------|
| 22464 hsa-mir-409 | SNCAIP    | 0.519821841 mirna_pc |
| 22465 hsa-mir-409 | KIF12     | 0.441264896 mirna_pc |
| 22466 hsa-mir-409 | C4A       | 0.332237286 mirna_pc |
| 22467 hsa-mir-409 | MED17     | 0.346364482 mirna_pc |
| 22468 hsa-mir-409 | HYOU1     | 0.372587562 mirna_pc |
| 22469 hsa-mir-409 | DHRS2     | 0.625334452 mirna_pc |
| 22470 hsa-mir-409 | CCDC102B  | 0.394103684 mirna_pc |
| 22471 hsa-mir-409 | AGPAT4    | 0.323413946 mirna_pc |
| 22472 hsa-mir-409 | LOC220594 | 0.329895649 mirna_pc |
| 22473 hsa-mir-409 | LOC645166 | 0.539368813 mirna_pc |
| 22474 hsa-mir-409 | NT5C3L    | 0.3202735 mirna_pc   |
| 22475 hsa-mir-409 | WDR73     | 0.425783364 mirna_pc |
| 22476 hsa-mir-409 | H2AFY2    | 0.305152264 mirna_pc |
| 22477 hsa-mir-409 | NES       | 0.325095248 mirna_pc |
| 22478 hsa-mir-409 | GJC1      | 0.338763244 mirna_pc |
| 22479 hsa-mir-32  | AUH       | 0.309074234 mirna_pc |
| 22480 hsa-mir-32  | CKS2      | 0.347256925 mirna_pc |
| 22481 hsa-mir-32  | PEX7      | 0.300257158 mirna_pc |
| 22482 hsa-mir-32  | GKAP1     | 0.316659896 mirna_pc |
| 22483 hsa-mir-32  | CABC1     | 0.306141776 mirna_pc |
| 22484 hsa-mir-32  | C6orf129  | 0.308231313 mirna_pc |
| 22485 hsa-mir-32  | DCXR      | 0.334147122 mirna_pc |
| 22486 hsa-mir-32  | SECISBP2  | 0.32593526 mirna_pc  |
| 22487 hsa-mir-32  | COMMD4    | 0.368727486 mirna_pc |
| 22488 hsa-mir-32  | APIP      | 0.318855663 mirna_pc |
| 22489 hsa-mir-32  | EIF2S2    | 0.340469494 mirna_pc |
| 22490 hsa-mir-32  | ARFIP2    | 0.303569263 mirna_pc |
| 22491 hsa-mir-32  | HDAC2     | 0.343910337 mirna_pc |
| 22492 hsa-mir-32  | MTIF3     | 0.317694663 mirna_pc |
| 22493 hsa-mir-32  | LCN2      | 0.300086812 mirna_pc |
| 22494 hsa-mir-32  | CCDC56    | 0.313197098 mirna_pc |
| 22495 hsa-mir-32  | COX7A2    | 0.350517855 mirna_pc |
| 22496 hsa-mir-32  | C9orf16   | 0.322060422 mirna_pc |
| 22497 hsa-mir-32  | FN3K      | 0.304388334 mirna_pc |
| 22498 hsa-mir-32  | FAM96A    | 0.350596727 mirna_pc |
| 22499 hsa-mir-32  | TOR2A     | 0.324506544 mirna_pc |
| 22500 hsa-mir-32  | HACL1     | 0.333601317 mirna_pc |
| 22501 hsa-mir-32  | ANP32B    | 0.312468579 mirna_pc |
| 22502 hsa-mir-32  | C11orf48  | 0.308579346 mirna_pc |
| 22503 hsa-mir-32  | PTGES2    | 0.305128287 mirna_pc |
| 22504 hsa-mir-32  | PLEKHJ1   | 0.350658567 mirna_pc |
| 22505 hsa-mir-32  | C15orf63  | 0.320980635 mirna_pc |
| 22506 hsa-mir-32  | BLOC1S1   | 0.344229049 mirna_pc |
| 22507 hsa-mir-32  | FAM136A   | 0.346374418 mirna_pc |
| 22508 hsa-mir-32  | MRPL48    | 0.354475033 mirna_pc |
| 22509 hsa-mir-32  | STRA13    | 0.346731176 mirna_pc |
| 22510 hsa-mir-32  | SPCS1     | 0.336746026 mirna_pc |
| 22511 hsa-mir-32  | SFXN4     | 0.302470308 mirna_pc |
| 22512 hsa-mir-32  | EPB41L4B  | 0.30958011 mirna_pc  |
| 22513 hsa-mir-32  | COPZ1     | 0.35642478 mirna_pc  |
| 22514 hsa-mir-32  | CHKA      | 0.316188269 mirna_pc |
| 22515 hsa-mir-32  | GNL3      | 0.373834823 mirna_pc |
| 22516 hsa-mir-32  | NSMCE4A   | 0.344709801 mirna_pc |
| 22517 hsa-mir-32  | RPS3      | 0.31411312 mirna_pc  |

|                      |           |                      |
|----------------------|-----------|----------------------|
| 22518 hsa-mir-32     | COX5A     | 0.401847184 mirna_pc |
| 22519 hsa-mir-32     | PQBP1     | 0.301715124 mirna_pc |
| 22520 hsa-mir-32     | NDUFA3    | 0.32328807 mirna_pc  |
| 22521 hsa-mir-32     | SERF2     | 0.303669884 mirna_pc |
| 22522 hsa-mir-32     | MRPS11    | 0.306125327 mirna_pc |
| 22523 hsa-mir-32     | MRPL50    | 0.348717478 mirna_pc |
| 22524 hsa-mir-32     | MRPL46    | 0.303777482 mirna_pc |
| 22525 hsa-mir-32     | TIMM17B   | 0.319848862 mirna_pc |
| 22526 hsa-mir-32     | HDHD3     | 0.30085712 mirna_pc  |
| 22527 hsa-mir-32     | C11orf10  | 0.334085741 mirna_pc |
| 22528 hsa-mir-32     | ERP29     | 0.305088935 mirna_pc |
| 22529 hsa-mir-32     | RPS17     | 0.306044305 mirna_pc |
| 22530 hsa-mir-32     | RNF5      | 0.346522729 mirna_pc |
| 22531 hsa-mir-32     | ANP32A    | 0.346702402 mirna_pc |
| 22532 hsa-mir-32     | C11orf75  | 0.305936654 mirna_pc |
| 22533 hsa-mir-32     | ATP5G2    | 0.381877118 mirna_pc |
| 22534 hsa-mir-32     | FXN       | 0.325114703 mirna_pc |
| 22535 hsa-mir-32     | RSL24D1   | 0.318546958 mirna_pc |
| 22536 hsa-mir-32     | URM1      | 0.340631651 mirna_pc |
| 22537 hsa-mir-32     | HINT2     | 0.319309416 mirna_pc |
| 22538 hsa-mir-32     | SRP14     | 0.301240482 mirna_pc |
| 22539 hsa-mir-32     | LSM 3.00  | 0.328899808 mirna_pc |
| 22540 hsa-mir-32     | RPLP2     | 0.31279885 mirna_pc  |
| 22541 hsa-mir-32     | NDUFB11   | 0.33079131 mirna_pc  |
| 22542 hsa-mir-32     | LOC440957 | 0.304244635 mirna_pc |
| 22543 hsa-mir-32     | ASPSCR1   | 0.329305273 mirna_pc |
| 22544 hsa-mir-32     | UBB       | 0.307249012 mirna_pc |
| 22545 hsa-mir-32     | RMRP      | 0.316840753 mirna_pc |
| 22546 hsa-mir-32     | CCDC72    | 0.31447535 mirna_pc  |
| 22547 hsa-mir-32     | TMEM14B   | 0.327493463 mirna_pc |
| 22548 hsa-mir-32     | UXT       | 0.404621444 mirna_pc |
| 22549 hsa-mir-32     | NDUFAF4   | 0.337254262 mirna_pc |
| 22550 hsa-mir-32     | PPCDC     | 0.364684989 mirna_pc |
| 22551 hsa-mir-32     | DPM2      | 0.30875769 mirna_pc  |
| 22552 hsa-mir-32     | RPPH1     | 0.315023548 mirna_pc |
| 22553 hsa-mir-32     | APOO      | 0.308700009 mirna_pc |
| 22554 hsa-mir-32     | DOM3Z     | 0.331910299 mirna_pc |
| 22555 hsa-mir-125b-2 | HOXC8     | 0.442726051 mirna_pc |
| 22556 hsa-mir-125b-2 | SEMA3E    | 0.777788346 mirna_pc |
| 22557 hsa-mir-125b-2 | EEF1A2    | 0.495754684 mirna_pc |
| 22558 hsa-mir-125b-2 | MYST4     | 0.450360252 mirna_pc |
| 22559 hsa-mir-125b-2 | ZNF467    | 0.350631466 mirna_pc |
| 22560 hsa-mir-125b-2 | ID4       | 0.400784091 mirna_pc |
| 22561 hsa-mir-125b-2 | YPEL1     | 0.470782413 mirna_pc |
| 22562 hsa-mir-125b-2 | CHEK2     | 0.348826889 mirna_pc |
| 22563 hsa-mir-125b-2 | C22orf39  | 0.330660135 mirna_pc |
| 22564 hsa-mir-125b-2 | RAD51AP1  | 0.306750786 mirna_pc |
| 22565 hsa-mir-125b-2 | CITED2    | 0.707066489 mirna_pc |
| 22566 hsa-mir-125b-2 | NR2F2     | 0.6198416 mirna_pc   |
| 22567 hsa-mir-125b-2 | MAGI2     | 0.308385672 mirna_pc |
| 22568 hsa-mir-125b-2 | STX6      | 0.306295443 mirna_pc |
| 22569 hsa-mir-125b-2 | HDHD2     | 0.346078223 mirna_pc |
| 22570 hsa-mir-125b-2 | DTWD1     | 0.406305325 mirna_pc |
| 22571 hsa-mir-125b-2 | RASGRP2   | 0.301790912 mirna_pc |

|       |                |           |             |          |
|-------|----------------|-----------|-------------|----------|
| 22572 | hsa-mir-125b-2 | MSH2      | 0.389245776 | mirna_pc |
| 22573 | hsa-mir-125b-2 | ZNF439    | 0.403332241 | mirna_pc |
| 22574 | hsa-mir-125b-2 | POLI      | 0.588916803 | mirna_pc |
| 22575 | hsa-mir-125b-2 | RNF185    | 0.300914055 | mirna_pc |
| 22576 | hsa-mir-125b-2 | TTC3      | 0.34745779  | mirna_pc |
| 22577 | hsa-mir-125b-2 | ZNF367    | 0.356492839 | mirna_pc |
| 22578 | hsa-mir-125b-2 | CCDC106   | 0.389911021 | mirna_pc |
| 22579 | hsa-mir-125b-2 | SLC5A12   | 0.542115831 | mirna_pc |
| 22580 | hsa-mir-125b-2 | DLG4      | 0.309478505 | mirna_pc |
| 22581 | hsa-mir-125b-2 | USP25     | 0.527303663 | mirna_pc |
| 22582 | hsa-mir-125b-2 | LOC375190 | 0.603317497 | mirna_pc |
| 22583 | hsa-mir-125b-2 | CRY1      | 0.306492795 | mirna_pc |
| 22584 | hsa-mir-125b-2 | HIST1H3D  | 0.372933687 | mirna_pc |
| 22585 | hsa-mir-125b-2 | SLC2A11   | 0.495121143 | mirna_pc |
| 22586 | hsa-mir-125b-2 | ZNF433    | 0.322523618 | mirna_pc |
| 22587 | hsa-mir-125b-2 | TYW3      | 0.632837358 | mirna_pc |
| 22588 | hsa-mir-125b-2 | GAD1      | 0.317983467 | mirna_pc |
| 22589 | hsa-mir-125b-2 | OXR1      | 0.350561064 | mirna_pc |
| 22590 | hsa-mir-125b-2 | KHDRBS1   | 0.316566941 | mirna_pc |
| 22591 | hsa-mir-125b-2 | TUB       | 0.352137596 | mirna_pc |
| 22592 | hsa-mir-125b-2 | PRR19     | 0.341801361 | mirna_pc |
| 22593 | hsa-mir-125b-2 | FIGN      | 0.762160724 | mirna_pc |
| 22594 | hsa-mir-125b-2 | PRRT1     | 0.427255573 | mirna_pc |
| 22595 | hsa-mir-125b-2 | SAMD11    | 0.470013562 | mirna_pc |
| 22596 | hsa-mir-125b-2 | PHF10     | 0.446519348 | mirna_pc |
| 22597 | hsa-mir-125b-2 | LOC284900 | 0.38724923  | mirna_pc |
| 22598 | hsa-mir-125b-2 | CAPS2     | 0.627337411 | mirna_pc |
| 22599 | hsa-mir-125b-2 | PHC1      | 0.386057495 | mirna_pc |
| 22600 | hsa-mir-125b-2 | SCD5      | 0.370688334 | mirna_pc |
| 22601 | hsa-mir-125b-2 | ELAVL1    | 0.308436569 | mirna_pc |
| 22602 | hsa-mir-125b-2 | CCDC121   | 0.363023888 | mirna_pc |
| 22603 | hsa-mir-125b-2 | SSBP2     | 0.375038453 | mirna_pc |
| 22604 | hsa-mir-125b-2 | TFAP2A    | 0.341775252 | mirna_pc |
| 22605 | hsa-mir-125b-2 | HABP4     | 0.67837349  | mirna_pc |
| 22606 | hsa-mir-125b-2 | TBCEL     | 0.323379048 | mirna_pc |
| 22607 | hsa-mir-125b-2 | C20orf160 | 0.459848392 | mirna_pc |
| 22608 | hsa-mir-125b-2 | CSAD      | 0.555017941 | mirna_pc |
| 22609 | hsa-mir-125b-2 | RNF2      | 0.311718895 | mirna_pc |
| 22610 | hsa-mir-125b-2 | CTSL2     | 0.367016895 | mirna_pc |
| 22611 | hsa-mir-125b-2 | PRAME     | 0.404350147 | mirna_pc |
| 22612 | hsa-mir-125b-2 | HNRNPK    | 0.302974439 | mirna_pc |
| 22613 | hsa-mir-125b-2 | KIAA0776  | 0.34824002  | mirna_pc |
| 22614 | hsa-mir-125b-2 | CA11      | 0.48354752  | mirna_pc |
| 22615 | hsa-mir-125b-2 | TDG       | 0.328800743 | mirna_pc |
| 22616 | hsa-mir-125b-2 | EIF4ENIF1 | 0.553086457 | mirna_pc |
| 22617 | hsa-mir-125b-2 | BAIAP3    | 0.455376394 | mirna_pc |
| 22618 | hsa-mir-125b-2 | LOC653501 | 0.316142788 | mirna_pc |
| 22619 | hsa-mir-125b-2 | TUG1      | 0.430998997 | mirna_pc |
| 22620 | hsa-mir-125b-2 | ITFG2     | 0.304741713 | mirna_pc |
| 22621 | hsa-mir-125b-2 | AMN1      | 0.500799174 | mirna_pc |
| 22622 | hsa-mir-125b-2 | HDAC2     | 0.31249068  | mirna_pc |
| 22623 | hsa-mir-125b-2 | FAM184A   | 0.311999023 | mirna_pc |
| 22624 | hsa-mir-125b-2 | TDRD5     | 0.391841256 | mirna_pc |
| 22625 | hsa-mir-125b-2 | CILP2     | 0.467684147 | mirna_pc |

|       |                |           |             |          |
|-------|----------------|-----------|-------------|----------|
| 22626 | hsa-mir-125b-2 | ZNF70     | 0.325260707 | mirna_pc |
| 22627 | hsa-mir-125b-2 | GRAMD1C   | 0.501570589 | mirna_pc |
| 22628 | hsa-mir-125b-2 | ZNF217    | 0.457150707 | mirna_pc |
| 22629 | hsa-mir-125b-2 | SOX4      | 0.321969369 | mirna_pc |
| 22630 | hsa-mir-125b-2 | CY TSA    | 0.321651824 | mirna_pc |
| 22631 | hsa-mir-125b-2 | FAM161A   | 0.308317639 | mirna_pc |
| 22632 | hsa-mir-125b-2 | DYRK1A    | 0.337212396 | mirna_pc |
| 22633 | hsa-mir-125b-2 | ZNF236    | 0.352857781 | mirna_pc |
| 22634 | hsa-mir-125b-2 | EFHD1     | 0.377825714 | mirna_pc |
| 22635 | hsa-mir-125b-2 | LPHN2     | 0.584309922 | mirna_pc |
| 22636 | hsa-mir-125b-2 | HIST3H2A  | 0.333798321 | mirna_pc |
| 22637 | hsa-mir-125b-2 | C6orf120  | 0.31177165  | mirna_pc |
| 22638 | hsa-mir-125b-2 | ZNF23     | 0.302815786 | mirna_pc |
| 22639 | hsa-mir-125b-2 | BARD1     | 0.375179292 | mirna_pc |
| 22640 | hsa-mir-125b-2 | PAPOLG    | 0.324280749 | mirna_pc |
| 22641 | hsa-mir-125b-2 | CNTNAP3   | 0.392253553 | mirna_pc |
| 22642 | hsa-mir-125b-2 | RPL23AP53 | 0.320792711 | mirna_pc |
| 22643 | hsa-mir-125b-2 | SAMD1     | 0.308507668 | mirna_pc |
| 22644 | hsa-mir-125b-2 | C16orf87  | 0.381111629 | mirna_pc |
| 22645 | hsa-mir-125b-2 | EDIL3     | 0.455626396 | mirna_pc |
| 22646 | hsa-mir-125b-2 | LOC144571 | 0.333671954 | mirna_pc |
| 22647 | hsa-mir-125b-2 | ZNF608    | 0.321277851 | mirna_pc |
| 22648 | hsa-mir-125b-2 | METTL13   | 0.324404551 | mirna_pc |
| 22649 | hsa-mir-125b-2 | SEMA3D    | 0.805861673 | mirna_pc |
| 22650 | hsa-mir-125b-2 | HACE1     | 0.348935726 | mirna_pc |
| 22651 | hsa-mir-125b-2 | KLRA1     | 0.344725144 | mirna_pc |
| 22652 | hsa-mir-125b-2 | DDX47     | 0.322141067 | mirna_pc |
| 22653 | hsa-mir-125b-2 | SLC25A30  | 0.461138479 | mirna_pc |
| 22654 | hsa-mir-125b-2 | VRK2      | 0.346444445 | mirna_pc |
| 22655 | hsa-mir-125b-2 | ZNF658    | 0.404215803 | mirna_pc |
| 22656 | hsa-mir-125b-2 | RBM43     | 0.371362335 | mirna_pc |
| 22657 | hsa-mir-125b-2 | GATA3     | 0.568065826 | mirna_pc |
| 22658 | hsa-mir-125b-2 | NETO2     | 0.381417407 | mirna_pc |
| 22659 | hsa-mir-125b-2 | LOC374443 | 0.310547598 | mirna_pc |
| 22660 | hsa-mir-125b-2 | RNPC3     | 0.333739861 | mirna_pc |
| 22661 | hsa-mir-125b-2 | OXTR      | 0.426833347 | mirna_pc |
| 22662 | hsa-mir-125b-2 | PAQR7     | 0.310731737 | mirna_pc |
| 22663 | hsa-mir-125b-2 | PEBP1     | 0.32600734  | mirna_pc |
| 22664 | hsa-mir-125b-2 | THSD7A    | 0.538085827 | mirna_pc |
| 22665 | hsa-mir-125b-2 | PPM1J     | 0.444111415 | mirna_pc |
| 22666 | hsa-mir-125b-2 | LOC440905 | 0.301417615 | mirna_pc |
| 22667 | hsa-mir-125b-2 | ZNF605    | 0.438988587 | mirna_pc |
| 22668 | hsa-mir-125b-2 | RRAGB     | 0.373302603 | mirna_pc |
| 22669 | hsa-mir-125b-2 | KLRAQ1    | 0.376841736 | mirna_pc |
| 22670 | hsa-mir-125b-2 | PCGF6     | 0.324098062 | mirna_pc |
| 22671 | hsa-mir-125b-2 | TCEA2     | 0.314986868 | mirna_pc |
| 22672 | hsa-mir-125b-2 | S1PR5     | 0.344796224 | mirna_pc |
| 22673 | hsa-mir-125b-2 | OSR2      | 0.426381826 | mirna_pc |
| 22674 | hsa-mir-125b-2 | C12orf76  | 0.373944401 | mirna_pc |
| 22675 | hsa-mir-125b-2 | C6orf170  | 0.392262565 | mirna_pc |
| 22676 | hsa-mir-125b-2 | GABPA     | 0.350734057 | mirna_pc |
| 22677 | hsa-mir-125b-2 | ZFP161    | 0.323053167 | mirna_pc |
| 22678 | hsa-mir-125b-2 | MEX3B     | 0.375679682 | mirna_pc |
| 22679 | hsa-mir-125b-2 | ZNF503    | 0.45027566  | mirna_pc |



|       |                |           |             |          |
|-------|----------------|-----------|-------------|----------|
| 22680 | hsa-mir-125b-2 | C8orf51   | 0.337720431 | mirna_pc |
| 22681 | hsa-mir-125b-2 | LOC728392 | 0.319981907 | mirna_pc |
| 22682 | hsa-mir-125b-2 | LANCL1    | 0.327215387 | mirna_pc |
| 22683 | hsa-mir-125b-2 | IL27RA    | 0.378990068 | mirna_pc |
| 22684 | hsa-mir-125b-2 | FM04      | 0.368159598 | mirna_pc |
| 22685 | hsa-mir-125b-2 | ZNF607    | 0.328328225 | mirna_pc |
| 22686 | hsa-mir-125b-2 | KCNC3     | 0.51908932  | mirna_pc |
| 22687 | hsa-mir-125b-2 | PIK3C3    | 0.374459739 | mirna_pc |
| 22688 | hsa-mir-125b-2 | ZNF362    | 0.338302367 | mirna_pc |
| 22689 | hsa-mir-125b-2 | ZNF84     | 0.382216071 | mirna_pc |
| 22690 | hsa-mir-125b-2 | GAS8      | 0.332084747 | mirna_pc |
| 22691 | hsa-mir-125b-2 | TAF4B     | 0.380874153 | mirna_pc |
| 22692 | hsa-mir-125b-2 | ZNF140    | 0.346216662 | mirna_pc |
| 22693 | hsa-mir-125b-2 | GALNT11   | 0.328822725 | mirna_pc |
| 22694 | hsa-mir-125b-2 | MTA3      | 0.441563923 | mirna_pc |
| 22695 | hsa-mir-125b-2 | PUS10     | 0.400431494 | mirna_pc |
| 22696 | hsa-mir-125b-2 | SCAND3    | 0.309039999 | mirna_pc |
| 22697 | hsa-mir-125b-2 | SEC61A2   | 0.431962514 | mirna_pc |
| 22698 | hsa-mir-125b-2 | PSPC1     | 0.443236345 | mirna_pc |
| 22699 | hsa-mir-125b-2 | OLFM2     | 0.373385633 | mirna_pc |
| 22700 | hsa-mir-125b-2 | DRG1      | 0.340910363 | mirna_pc |
| 22701 | hsa-mir-125b-2 | SSX2IP    | 0.354059219 | mirna_pc |
| 22702 | hsa-mir-125b-2 | TMC8      | 0.313807884 | mirna_pc |
| 22703 | hsa-mir-125b-2 | NF2       | 0.478836487 | mirna_pc |
| 22704 | hsa-mir-125b-2 | TTC27     | 0.330679656 | mirna_pc |
| 22705 | hsa-mir-125b-2 | KPNA5     | 0.300321271 | mirna_pc |
| 22706 | hsa-mir-125b-2 | MYBL1     | 0.545406829 | mirna_pc |
| 22707 | hsa-mir-125b-2 | RNF187    | 0.315462203 | mirna_pc |
| 22708 | hsa-mir-125b-2 | TCTE3     | 0.311751258 | mirna_pc |
| 22709 | hsa-mir-125b-2 | CLSTN3    | 0.30600575  | mirna_pc |
| 22710 | hsa-mir-125b-2 | WBP4      | 0.32359392  | mirna_pc |
| 22711 | hsa-mir-125b-2 | CHRNA1    | 0.301655667 | mirna_pc |
| 22712 | hsa-mir-125b-2 | RIMKLB    | 0.378116528 | mirna_pc |
| 22713 | hsa-mir-125b-2 | GAS1      | 0.368268406 | mirna_pc |
| 22714 | hsa-mir-125b-2 | ZNF692    | 0.315836219 | mirna_pc |
| 22715 | hsa-mir-125b-2 | EFNA5     | 0.547911741 | mirna_pc |
| 22716 | hsa-mir-125b-2 | HCG18     | 0.307317838 | mirna_pc |
| 22717 | hsa-mir-125b-2 | C18orf10  | 0.44465097  | mirna_pc |
| 22718 | hsa-mir-125b-2 | C10orf41  | 0.424722606 | mirna_pc |
| 22719 | hsa-mir-125b-2 | SUDS3     | 0.377391949 | mirna_pc |
| 22720 | hsa-mir-125b-2 | MAMSTR    | 0.564832531 | mirna_pc |
| 22721 | hsa-mir-125b-2 | TMEM136   | 0.431918779 | mirna_pc |
| 22722 | hsa-mir-125b-2 | PNMAL2    | 0.432453864 | mirna_pc |
| 22723 | hsa-mir-125b-2 | CCDC78    | 0.41342354  | mirna_pc |
| 22724 | hsa-mir-125b-2 | DNM3      | 0.733066571 | mirna_pc |
| 22725 | hsa-mir-125b-2 | RPL7      | 0.326028358 | mirna_pc |
| 22726 | hsa-mir-125b-2 | SEMA3C    | 0.329871499 | mirna_pc |
| 22727 | hsa-mir-125b-2 | PEX2      | 0.35755102  | mirna_pc |
| 22728 | hsa-mir-125b-2 | WDR78     | 0.511103338 | mirna_pc |
| 22729 | hsa-mir-125b-2 | KGFLP2    | 0.388562416 | mirna_pc |
| 22730 | hsa-mir-125b-2 | IFT81     | 0.354739948 | mirna_pc |
| 22731 | hsa-mir-125b-2 | ZNF786    | 0.300591196 | mirna_pc |
| 22732 | hsa-mir-125b-2 | ZNF184    | 0.364494586 | mirna_pc |
| 22733 | hsa-mir-125b-2 | MBLAC2    | 0.390252532 | mirna_pc |

|       |                |           |             |          |
|-------|----------------|-----------|-------------|----------|
| 22734 | hsa-mir-125b-2 | NIPSNAP1  | 0.521806353 | mirna_pc |
| 22735 | hsa-mir-125b-2 | DEPDC5    | 0.344162968 | mirna_pc |
| 22736 | hsa-mir-125b-2 | C8orf37   | 0.654038133 | mirna_pc |
| 22737 | hsa-mir-125b-2 | PDGFC     | 0.493619458 | mirna_pc |
| 22738 | hsa-mir-125b-2 | SPA17     | 0.322588634 | mirna_pc |
| 22739 | hsa-mir-125b-2 | WDR92     | 0.377911564 | mirna_pc |
| 22740 | hsa-mir-125b-2 | PCSK4     | 0.380564587 | mirna_pc |
| 22741 | hsa-mir-125b-2 | SFI1      | 0.581921228 | mirna_pc |
| 22742 | hsa-mir-125b-2 | AEBP2     | 0.370083175 | mirna_pc |
| 22743 | hsa-mir-125b-2 | MAP3K12   | 0.539404496 | mirna_pc |
| 22744 | hsa-mir-125b-2 | ZBTB10    | 0.372271951 | mirna_pc |
| 22745 | hsa-mir-125b-2 | SOCS5     | 0.372504973 | mirna_pc |
| 22746 | hsa-mir-125b-2 | YTHDF2    | 0.311371197 | mirna_pc |
| 22747 | hsa-mir-125b-2 | TTC21B    | 0.353890412 | mirna_pc |
| 22748 | hsa-mir-125b-2 | ZNF627    | 0.331052775 | mirna_pc |
| 22749 | hsa-mir-125b-2 | LDB1      | 0.32584038  | mirna_pc |
| 22750 | hsa-mir-125b-2 | ANGPT1    | 0.788439678 | mirna_pc |
| 22751 | hsa-mir-125b-2 | EXTL2     | 0.345722579 | mirna_pc |
| 22752 | hsa-mir-125b-2 | LOC440173 | 0.30525984  | mirna_pc |
| 22753 | hsa-mir-125b-2 | ARID1A    | 0.331005049 | mirna_pc |
| 22754 | hsa-mir-125b-2 | ATAD2B    | 0.351633809 | mirna_pc |
| 22755 | hsa-mir-125b-2 | ZNF558    | 0.397334896 | mirna_pc |
| 22756 | hsa-mir-125b-2 | NAB2      | 0.45643018  | mirna_pc |
| 22757 | hsa-mir-125b-2 | EMP2      | 0.348082439 | mirna_pc |
| 22758 | hsa-mir-125b-2 | FDXACB1   | 0.344757624 | mirna_pc |
| 22759 | hsa-mir-125b-2 | ISYNA1    | 0.532169886 | mirna_pc |
| 22760 | hsa-mir-125b-2 | LOC338758 | 0.470652375 | mirna_pc |
| 22761 | hsa-mir-125b-2 | SCPEP1    | 0.316036462 | mirna_pc |
| 22762 | hsa-mir-125b-2 | KIF27     | 0.342186862 | mirna_pc |
| 22763 | hsa-mir-125b-2 | TEAD2     | 0.300181079 | mirna_pc |
| 22764 | hsa-mir-125b-2 | PCMTD2    | 0.322867769 | mirna_pc |
| 22765 | hsa-mir-125b-2 | ZNF638    | 0.342925692 | mirna_pc |
| 22766 | hsa-mir-125b-2 | ZNF384    | 0.310799302 | mirna_pc |
| 22767 | hsa-mir-125b-2 | SMO       | 0.319434134 | mirna_pc |
| 22768 | hsa-mir-125b-2 | ZNF20     | 0.332110772 | mirna_pc |
| 22769 | hsa-mir-125b-2 | FBX017    | 0.343595988 | mirna_pc |
| 22770 | hsa-mir-125b-2 | LUC7L2    | 0.319237821 | mirna_pc |
| 22771 | hsa-mir-125b-2 | PIP5K1A   | 0.366916302 | mirna_pc |
| 22772 | hsa-mir-125b-2 | TMX3      | 0.395591364 | mirna_pc |
| 22773 | hsa-mir-125b-2 | ZNF512    | 0.425609171 | mirna_pc |
| 22774 | hsa-mir-125b-2 | GRB14     | 0.494840816 | mirna_pc |
| 22775 | hsa-mir-125b-2 | USP21     | 0.307252244 | mirna_pc |
| 22776 | hsa-mir-125b-2 | ZNF74     | 0.427104331 | mirna_pc |
| 22777 | hsa-mir-125b-2 | HTR7P1    | 0.534201477 | mirna_pc |
| 22778 | hsa-mir-125b-2 | OSGEPL1   | 0.362429944 | mirna_pc |
| 22779 | hsa-mir-125b-2 | PEX13     | 0.403886255 | mirna_pc |
| 22780 | hsa-mir-125b-2 | DCAF17    | 0.379697009 | mirna_pc |
| 22781 | hsa-mir-125b-2 | ETAA1     | 0.355991874 | mirna_pc |
| 22782 | hsa-mir-125b-2 | HNRNPH3   | 0.409490001 | mirna_pc |
| 22783 | hsa-mir-125b-2 | HMGN3     | 0.356977065 | mirna_pc |
| 22784 | hsa-mir-125b-2 | B4GALT6   | 0.392700721 | mirna_pc |
| 22785 | hsa-mir-125b-2 | UBTF      | 0.300296677 | mirna_pc |
| 22786 | hsa-mir-125b-2 | CEP290    | 0.343021446 | mirna_pc |
| 22787 | hsa-mir-125b-2 | CNIH2     | 0.479191783 | mirna_pc |

|       |                |           |             |          |
|-------|----------------|-----------|-------------|----------|
| 22788 | hsa-mir-125b-2 | HHAT      | 0.39221862  | mirna_pc |
| 22789 | hsa-mir-125b-2 | PMS1      | 0.326226383 | mirna_pc |
| 22790 | hsa-mir-125b-2 | EID3      | 0.617720035 | mirna_pc |
| 22791 | hsa-mir-125b-2 | KIAA1467  | 0.365991129 | mirna_pc |
| 22792 | hsa-mir-125b-2 | PAPLN     | 0.351109265 | mirna_pc |
| 22793 | hsa-mir-125b-2 | ABHD12    | 0.320277066 | mirna_pc |
| 22794 | hsa-mir-125b-2 | UBE2W     | 0.316073206 | mirna_pc |
| 22795 | hsa-mir-125b-2 | GATS      | 0.504424889 | mirna_pc |
| 22796 | hsa-mir-125b-2 | TRUB1     | 0.42703578  | mirna_pc |
| 22797 | hsa-mir-125b-2 | PLAC2     | 0.679954629 | mirna_pc |
| 22798 | hsa-mir-125b-2 | ROBO1     | 0.434872859 | mirna_pc |
| 22799 | hsa-mir-125b-2 | C2orf15   | 0.350773025 | mirna_pc |
| 22800 | hsa-mir-125b-2 | C12orf24  | 0.499255788 | mirna_pc |
| 22801 | hsa-mir-125b-2 | CCDC102A  | 0.323471506 | mirna_pc |
| 22802 | hsa-mir-125b-2 | TULP3     | 0.361197514 | mirna_pc |
| 22803 | hsa-mir-125b-2 | NFYB      | 0.30464284  | mirna_pc |
| 22804 | hsa-mir-125b-2 | LCA5L     | 0.372654582 | mirna_pc |
| 22805 | hsa-mir-125b-2 | SEMA3A    | 0.645274701 | mirna_pc |
| 22806 | hsa-mir-125b-2 | THNSL1    | 0.338523848 | mirna_pc |
| 22807 | hsa-mir-125b-2 | USP13     | 0.426316963 | mirna_pc |
| 22808 | hsa-mir-125b-2 | FAM120C   | 0.383810084 | mirna_pc |
| 22809 | hsa-mir-125b-2 | ESF1      | 0.311191546 | mirna_pc |
| 22810 | hsa-mir-125b-2 | PDGFRL    | 0.50960884  | mirna_pc |
| 22811 | hsa-mir-125b-2 | GPR37     | 0.379152588 | mirna_pc |
| 22812 | hsa-mir-125b-2 | MIB1      | 0.304695683 | mirna_pc |
| 22813 | hsa-mir-125b-2 | SS18      | 0.389070082 | mirna_pc |
| 22814 | hsa-mir-125b-2 | ZNF391    | 0.395575574 | mirna_pc |
| 22815 | hsa-mir-125b-2 | IFT74     | 0.568751369 | mirna_pc |
| 22816 | hsa-mir-125b-2 | MAST1     | 0.423821763 | mirna_pc |
| 22817 | hsa-mir-125b-2 | NR5A2     | 0.415817594 | mirna_pc |
| 22818 | hsa-mir-125b-2 | TTC39C    | 0.334245203 | mirna_pc |
| 22819 | hsa-mir-125b-2 | MYNN      | 0.303604623 | mirna_pc |
| 22820 | hsa-mir-125b-2 | MDM1      | 0.737946556 | mirna_pc |
| 22821 | hsa-mir-125b-2 | ZNF740    | 0.312553154 | mirna_pc |
| 22822 | hsa-mir-125b-2 | TNPO2     | 0.303453679 | mirna_pc |
| 22823 | hsa-mir-125b-2 | TRO       | 0.336190393 | mirna_pc |
| 22824 | hsa-mir-125b-2 | BBS10     | 0.421206942 | mirna_pc |
| 22825 | hsa-mir-125b-2 | PBX2      | 0.390571215 | mirna_pc |
| 22826 | hsa-mir-125b-2 | SFRS15    | 0.456143428 | mirna_pc |
| 22827 | hsa-mir-125b-2 | SLITRK6   | 0.593485432 | mirna_pc |
| 22828 | hsa-mir-125b-2 | UXS1      | 0.336378161 | mirna_pc |
| 22829 | hsa-mir-125b-2 | ANKRD34A  | 0.387882206 | mirna_pc |
| 22830 | hsa-mir-125b-2 | HAPLN1    | 0.74237811  | mirna_pc |
| 22831 | hsa-mir-125b-2 | C6orf70   | 0.335412441 | mirna_pc |
| 22832 | hsa-mir-125b-2 | RTF1      | 0.340524902 | mirna_pc |
| 22833 | hsa-mir-125b-2 | SYNGAP1   | 0.353957384 | mirna_pc |
| 22834 | hsa-mir-125b-2 | C8orf45   | 0.378957448 | mirna_pc |
| 22835 | hsa-mir-125b-2 | DBNDD1    | 0.395128027 | mirna_pc |
| 22836 | hsa-mir-125b-2 | PPOX      | 0.327226848 | mirna_pc |
| 22837 | hsa-mir-125b-2 | GTF2IP1   | 0.316025111 | mirna_pc |
| 22838 | hsa-mir-125b-2 | LOC221710 | 0.397272291 | mirna_pc |
| 22839 | hsa-mir-125b-2 | TSGA10    | 0.474691791 | mirna_pc |
| 22840 | hsa-mir-125b-2 | BRSK1     | 0.30285509  | mirna_pc |
| 22841 | hsa-mir-125b-2 | DGCR6     | 0.439893543 | mirna_pc |

|       |                |              |             |          |
|-------|----------------|--------------|-------------|----------|
| 22842 | hsa-mir-125b-2 | CRYZ         | 0.623560729 | mirna_pc |
| 22843 | hsa-mir-125b-2 | TIA1         | 0.340589348 | mirna_pc |
| 22844 | hsa-mir-125b-2 | ZNF664       | 0.323306223 | mirna_pc |
| 22845 | hsa-mir-125b-2 | SMEK2        | 0.372127341 | mirna_pc |
| 22846 | hsa-mir-125b-2 | ATL2         | 0.524177398 | mirna_pc |
| 22847 | hsa-mir-125b-2 | TBX1         | 0.402657369 | mirna_pc |
| 22848 | hsa-mir-125b-2 | KDELC2       | 0.357769932 | mirna_pc |
| 22849 | hsa-mir-125b-2 | KILLIN       | 0.323373674 | mirna_pc |
| 22850 | hsa-mir-125b-2 | PRICKLE1     | 0.635540983 | mirna_pc |
| 22851 | hsa-mir-125b-2 | GCF1         | 0.310793626 | mirna_pc |
| 22852 | hsa-mir-125b-2 | UBE3A        | 0.328658974 | mirna_pc |
| 22853 | hsa-mir-125b-2 | ZCCHC11      | 0.357922337 | mirna_pc |
| 22854 | hsa-mir-125b-2 | CETN3        | 0.319166907 | mirna_pc |
| 22855 | hsa-mir-125b-2 | ZNF644       | 0.316318864 | mirna_pc |
| 22856 | hsa-mir-125b-2 | PIK3R2       | 0.300340592 | mirna_pc |
| 22857 | hsa-mir-125b-2 | PRPF40B      | 0.341022248 | mirna_pc |
| 22858 | hsa-mir-125b-2 | TCTN1        | 0.321762503 | mirna_pc |
| 22859 | hsa-mir-125b-2 | CTXN1        | 0.6208915   | mirna_pc |
| 22860 | hsa-mir-125b-2 | RNF215       | 0.346764406 | mirna_pc |
| 22861 | hsa-mir-125b-2 | ZNF680       | 0.310045586 | mirna_pc |
| 22862 | hsa-mir-125b-2 | LOC283070    | 0.5476287   | mirna_pc |
| 22863 | hsa-mir-125b-2 | CCDC117      | 0.335604761 | mirna_pc |
| 22864 | hsa-mir-125b-2 | C10orf46     | 0.304697007 | mirna_pc |
| 22865 | hsa-mir-125b-2 | HSDL1        | 0.474628877 | mirna_pc |
| 22866 | hsa-mir-125b-2 | SLC11A2      | 0.611060393 | mirna_pc |
| 22867 | hsa-mir-125b-2 | LOC100129387 | 0.493505427 | mirna_pc |
| 22868 | hsa-mir-125b-2 | FBX011       | 0.365993867 | mirna_pc |
| 22869 | hsa-mir-125b-2 | HEY2         | 0.398673628 | mirna_pc |
| 22870 | hsa-mir-125b-2 | ZFP37        | 0.328157452 | mirna_pc |
| 22871 | hsa-mir-125b-2 | HSPC157      | 0.30916847  | mirna_pc |
| 22872 | hsa-mir-125b-2 | IRX5         | 0.301031447 | mirna_pc |
| 22873 | hsa-mir-125b-2 | THOC5        | 0.307247678 | mirna_pc |
| 22874 | hsa-mir-125b-2 | CAMK1D       | 0.401495473 | mirna_pc |
| 22875 | hsa-mir-125b-2 | LCA5         | 0.689330411 | mirna_pc |
| 22876 | hsa-mir-125b-2 | CDC73        | 0.419795012 | mirna_pc |
| 22877 | hsa-mir-125b-2 | SLC2A3       | 0.357671199 | mirna_pc |
| 22878 | hsa-mir-125b-2 | C22orf29     | 0.390624797 | mirna_pc |
| 22879 | hsa-mir-125b-2 | WDSUB1       | 0.40307348  | mirna_pc |
| 22880 | hsa-mir-125b-2 | PITPNB       | 0.301151335 | mirna_pc |
| 22881 | hsa-mir-125b-2 | BTF3L4       | 0.401838442 | mirna_pc |
| 22882 | hsa-mir-125b-2 | DDX59        | 0.314808422 | mirna_pc |
| 22883 | hsa-mir-125b-2 | AFG3L1       | 0.309196624 | mirna_pc |
| 22884 | hsa-mir-125b-2 | SOX6         | 0.309811429 | mirna_pc |
| 22885 | hsa-mir-125b-2 | SS18L1       | 0.33131726  | mirna_pc |
| 22886 | hsa-mir-19b-2  | CENPF        | 0.334148081 | mirna_pc |
| 22887 | hsa-mir-19b-2  | ASPM         | 0.302714831 | mirna_pc |
| 22888 | hsa-mir-19b-2  | FANCA        | 0.348598705 | mirna_pc |
| 22889 | hsa-mir-19b-2  | NCAPG        | 0.316532104 | mirna_pc |
| 22890 | hsa-mir-19b-2  | CDC25B       | 0.358872737 | mirna_pc |
| 22891 | hsa-mir-19b-2  | CBX3         | 0.331208065 | mirna_pc |
| 22892 | hsa-mir-19b-2  | NEK2         | 0.351386613 | mirna_pc |
| 22893 | hsa-mir-19b-2  | MAD2L1       | 0.325925405 | mirna_pc |
| 22894 | hsa-mir-19b-2  | XPO1         | 0.333923789 | mirna_pc |
| 22895 | hsa-mir-19b-2  | KNTC1        | 0.324549464 | mirna_pc |

|                     |           |                      |
|---------------------|-----------|----------------------|
| 22896 hsa-mir-19b-2 | NUF2      | 0.388969397 mirna_pc |
| 22897 hsa-mir-19b-2 | PLK4      | 0.353732149 mirna_pc |
| 22898 hsa-mir-19b-2 | KIF18A    | 0.314773677 mirna_pc |
| 22899 hsa-mir-19b-2 | DEPDC1    | 0.317460744 mirna_pc |
| 22900 hsa-mir-19b-2 | SKA3      | 0.405199918 mirna_pc |
| 22901 hsa-mir-19b-2 | KIF14     | 0.316448376 mirna_pc |
| 22902 hsa-mir-19b-2 | HJURP     | 0.346573777 mirna_pc |
| 22903 hsa-mir-19b-2 | BLM       | 0.340282137 mirna_pc |
| 22904 hsa-mir-19b-2 | PAICS     | 0.313988674 mirna_pc |
| 22905 hsa-mir-19b-2 | CCDC150   | 0.36262277 mirna_pc  |
| 22906 hsa-mir-19b-2 | DTL       | 0.365507321 mirna_pc |
| 22907 hsa-mir-19b-2 | CENPK     | 0.36130243 mirna_pc  |
| 22908 hsa-mir-19b-2 | SGOL2     | 0.32761588 mirna_pc  |
| 22909 hsa-mir-19b-2 | C1orf112  | 0.37224214 mirna_pc  |
| 22910 hsa-mir-19b-2 | GINS1     | 0.314475013 mirna_pc |
| 22911 hsa-mir-19b-2 | C12orf48  | 0.319144409 mirna_pc |
| 22912 hsa-mir-19b-2 | HELLS     | 0.323024941 mirna_pc |
| 22913 hsa-mir-19b-2 | HNRNPA2B1 | 0.313011924 mirna_pc |
| 22914 hsa-mir-19b-2 | MCM6      | 0.326372117 mirna_pc |
| 22915 hsa-mir-19b-2 | CDCA7     | 0.30469779 mirna_pc  |
| 22916 hsa-mir-19b-2 | FAM60A    | 0.343157962 mirna_pc |
| 22917 hsa-mir-19b-2 | ATAD5     | 0.320282586 mirna_pc |
| 22918 hsa-mir-19b-2 | RFC3      | 0.37737204 mirna_pc  |
| 22919 hsa-mir-19b-2 | DEPDC1B   | 0.312934661 mirna_pc |
| 22920 hsa-mir-19b-2 | GEN1      | 0.332169193 mirna_pc |
| 22921 hsa-mir-19b-2 | HMGB2     | 0.329998549 mirna_pc |
| 22922 hsa-mir-19b-2 | DNA2      | 0.314222101 mirna_pc |
| 22923 hsa-mir-19b-2 | NOP56     | 0.362392264 mirna_pc |
| 22924 hsa-mir-19b-2 | DLEU2     | 0.340922794 mirna_pc |
| 22925 hsa-mir-19b-2 | FERMT1    | 0.35078527 mirna_pc  |
| 22926 hsa-mir-19b-2 | MSH2      | 0.324818429 mirna_pc |
| 22927 hsa-mir-19b-2 | CDC7      | 0.315728728 mirna_pc |
| 22928 hsa-mir-19b-2 | SSB       | 0.370464976 mirna_pc |
| 22929 hsa-mir-19b-2 | FBX05     | 0.337570593 mirna_pc |
| 22930 hsa-mir-19b-2 | E2F3      | 0.376423986 mirna_pc |
| 22931 hsa-mir-19b-2 | DDX11     | 0.311232327 mirna_pc |
| 22932 hsa-mir-19b-2 | CDC25A    | 0.333252823 mirna_pc |
| 22933 hsa-mir-19b-2 | DDX12     | 0.333353497 mirna_pc |
| 22934 hsa-mir-19b-2 | C13orf34  | 0.455824146 mirna_pc |
| 22935 hsa-mir-19b-2 | MCM8      | 0.445892434 mirna_pc |
| 22936 hsa-mir-19b-2 | PUS7      | 0.326170971 mirna_pc |
| 22937 hsa-mir-19b-2 | NCL       | 0.320943439 mirna_pc |
| 22938 hsa-mir-19b-2 | PSRC1     | 0.306791143 mirna_pc |
| 22939 hsa-mir-19b-2 | C13orf37  | 0.42403202 mirna_pc  |
| 22940 hsa-mir-19b-2 | PNPT1     | 0.333981652 mirna_pc |
| 22941 hsa-mir-19b-2 | TMPO      | 0.311853997 mirna_pc |
| 22942 hsa-mir-19b-2 | SET       | 0.300798155 mirna_pc |
| 22943 hsa-mir-19b-2 | LOC388796 | 0.326901812 mirna_pc |
| 22944 hsa-mir-19b-2 | GABPB1    | 0.355370145 mirna_pc |
| 22945 hsa-mir-19b-2 | CCDC138   | 0.309535253 mirna_pc |
| 22946 hsa-mir-19b-2 | HMG2      | 0.309745512 mirna_pc |
| 22947 hsa-mir-19b-2 | ETV4      | 0.32926348 mirna_pc  |
| 22948 hsa-mir-19b-2 | SFRS1     | 0.359196015 mirna_pc |
| 22949 hsa-mir-19b-2 | WDR43     | 0.303955455 mirna_pc |

|       |               |           |             |          |
|-------|---------------|-----------|-------------|----------|
| 22950 | hsa-mir-19b-2 | C4orf46   | 0.332793599 | mirna_pc |
| 22951 | hsa-mir-19b-2 | HSPD1     | 0.345755574 | mirna_pc |
| 22952 | hsa-mir-19b-2 | SSRP1     | 0.319560705 | mirna_pc |
| 22953 | hsa-mir-19b-2 | KHDRBS1   | 0.366910112 | mirna_pc |
| 22954 | hsa-mir-19b-2 | PRPF40A   | 0.363015123 | mirna_pc |
| 22955 | hsa-mir-19b-2 | CCDC18    | 0.31136646  | mirna_pc |
| 22956 | hsa-mir-19b-2 | DNAJC2    | 0.344498447 | mirna_pc |
| 22957 | hsa-mir-19b-2 | SLC39A10  | 0.372866206 | mirna_pc |
| 22958 | hsa-mir-19b-2 | ZNF695    | 0.33745839  | mirna_pc |
| 22959 | hsa-mir-19b-2 | HAUS6     | 0.340739587 | mirna_pc |
| 22960 | hsa-mir-19b-2 | CENPJ     | 0.368478553 | mirna_pc |
| 22961 | hsa-mir-19b-2 | HNRNPU    | 0.32423682  | mirna_pc |
| 22962 | hsa-mir-19b-2 | NASP      | 0.320692192 | mirna_pc |
| 22963 | hsa-mir-19b-2 | PTMA      | 0.324973584 | mirna_pc |
| 22964 | hsa-mir-19b-2 | SUV39H2   | 0.30252791  | mirna_pc |
| 22965 | hsa-mir-19b-2 | GTF2F2    | 0.341955177 | mirna_pc |
| 22966 | hsa-mir-19b-2 | POP1      | 0.357810989 | mirna_pc |
| 22967 | hsa-mir-19b-2 | HSP90B1   | 0.336183469 | mirna_pc |
| 22968 | hsa-mir-19b-2 | NUDT15    | 0.333773598 | mirna_pc |
| 22969 | hsa-mir-19b-2 | SLM02     | 0.357624226 | mirna_pc |
| 22970 | hsa-mir-19b-2 | DHFR      | 0.320328063 | mirna_pc |
| 22971 | hsa-mir-19b-2 | NAA25     | 0.306868722 | mirna_pc |
| 22972 | hsa-mir-19b-2 | DEK       | 0.366285663 | mirna_pc |
| 22973 | hsa-mir-19b-2 | TRIB3     | 0.352301007 | mirna_pc |
| 22974 | hsa-mir-19b-2 | PASK      | 0.348115199 | mirna_pc |
| 22975 | hsa-mir-19b-2 | HEATR2    | 0.34610901  | mirna_pc |
| 22976 | hsa-mir-19b-2 | CYB5B     | 0.336603866 | mirna_pc |
| 22977 | hsa-mir-19b-2 | CEP152    | 0.302951255 | mirna_pc |
| 22978 | hsa-mir-19b-2 | CDRT4     | 0.32079313  | mirna_pc |
| 22979 | hsa-mir-19b-2 | SLM01     | 0.304030551 | mirna_pc |
| 22980 | hsa-mir-19b-2 | RNF219    | 0.495605951 | mirna_pc |
| 22981 | hsa-mir-19b-2 | SLC25A32  | 0.356562109 | mirna_pc |
| 22982 | hsa-mir-19b-2 | DDX55     | 0.313871384 | mirna_pc |
| 22983 | hsa-mir-19b-2 | HDAC2     | 0.36134548  | mirna_pc |
| 22984 | hsa-mir-19b-2 | XRN2      | 0.34356846  | mirna_pc |
| 22985 | hsa-mir-19b-2 | KPNB1     | 0.369592842 | mirna_pc |
| 22986 | hsa-mir-19b-2 | SMC3      | 0.398568258 | mirna_pc |
| 22987 | hsa-mir-19b-2 | MEX3A     | 0.476921296 | mirna_pc |
| 22988 | hsa-mir-19b-2 | BAT1      | 0.306956335 | mirna_pc |
| 22989 | hsa-mir-19b-2 | HMGB1     | 0.389268196 | mirna_pc |
| 22990 | hsa-mir-19b-2 | DIAPH3    | 0.344750995 | mirna_pc |
| 22991 | hsa-mir-19b-2 | MCTP2     | 0.307023864 | mirna_pc |
| 22992 | hsa-mir-19b-2 | LOC642846 | 0.305702856 | mirna_pc |
| 22993 | hsa-mir-19b-2 | TGIF2     | 0.389051244 | mirna_pc |
| 22994 | hsa-mir-19b-2 | MTF2      | 0.321970751 | mirna_pc |
| 22995 | hsa-mir-19b-2 | POLE      | 0.333639075 | mirna_pc |
| 22996 | hsa-mir-19b-2 | SOX9      | 0.352154672 | mirna_pc |
| 22997 | hsa-mir-19b-2 | C13orf27  | 0.424810227 | mirna_pc |
| 22998 | hsa-mir-19b-2 | RBMX      | 0.346978577 | mirna_pc |
| 22999 | hsa-mir-19b-2 | GPR180    | 0.37963882  | mirna_pc |
| 23000 | hsa-mir-19b-2 | DAP3      | 0.31318424  | mirna_pc |
| 23001 | hsa-mir-19b-2 | MDC 1.00  | 0.310656512 | mirna_pc |
| 23002 | hsa-mir-19b-2 | XRCC5     | 0.32685411  | mirna_pc |
| 23003 | hsa-mir-19b-2 | EXOSC8    | 0.339613873 | mirna_pc |

|       |               |          |             |          |
|-------|---------------|----------|-------------|----------|
| 23004 | hsa-mir-19b-2 | TAF1D    | 0.336456026 | mirna_pc |
| 23005 | hsa-mir-19b-2 | FAM136A  | 0.343432999 | mirna_pc |
| 23006 | hsa-mir-19b-2 | NRAS     | 0.382031839 | mirna_pc |
| 23007 | hsa-mir-19b-2 | ITPR1PL1 | 0.300196225 | mirna_pc |
| 23008 | hsa-mir-19b-2 | SNORA8   | 0.38516619  | mirna_pc |
| 23009 | hsa-mir-19b-2 | CSNK2A1  | 0.309639781 | mirna_pc |
| 23010 | hsa-mir-19b-2 | RPIA     | 0.313368016 | mirna_pc |
| 23011 | hsa-mir-19b-2 | ZNF286A  | 0.317975314 | mirna_pc |
| 23012 | hsa-mir-19b-2 | RBM28    | 0.312056321 | mirna_pc |
| 23013 | hsa-mir-19b-2 | ANKRD46  | 0.304007497 | mirna_pc |
| 23014 | hsa-mir-19b-2 | C13orf23 | 0.35937115  | mirna_pc |
| 23015 | hsa-mir-19b-2 | TOP 1.00 | 0.360863751 | mirna_pc |
| 23016 | hsa-mir-19b-2 | TCERG1   | 0.348048689 | mirna_pc |
| 23017 | hsa-mir-19b-2 | PSPC1    | 0.301521045 | mirna_pc |
| 23018 | hsa-mir-19b-2 | TOP1P1   | 0.307560878 | mirna_pc |
| 23019 | hsa-mir-19b-2 | E2F6     | 0.36724661  | mirna_pc |
| 23020 | hsa-mir-19b-2 | SFRS13A  | 0.371861014 | mirna_pc |
| 23021 | hsa-mir-19b-2 | SCLY     | 0.367525418 | mirna_pc |
| 23022 | hsa-mir-19b-2 | TGDS     | 0.392169176 | mirna_pc |
| 23023 | hsa-mir-19b-2 | KIAA1704 | 0.353634456 | mirna_pc |
| 23024 | hsa-mir-19b-2 | MTIF2    | 0.340637603 | mirna_pc |
| 23025 | hsa-mir-19b-2 | EWSR1    | 0.340507103 | mirna_pc |
| 23026 | hsa-mir-19b-2 | ZNF828   | 0.312233177 | mirna_pc |
| 23027 | hsa-mir-19b-2 | SMC1A    | 0.312403597 | mirna_pc |
| 23028 | hsa-mir-19b-2 | NUPL1    | 0.491953185 | mirna_pc |
| 23029 | hsa-mir-19b-2 | ANKRD5   | 0.303004001 | mirna_pc |
| 23030 | hsa-mir-19b-2 | UPF3A    | 0.363463339 | mirna_pc |
| 23031 | hsa-mir-19b-2 | MRPL42   | 0.341778859 | mirna_pc |
| 23032 | hsa-mir-19b-2 | SF3B2    | 0.317191965 | mirna_pc |
| 23033 | hsa-mir-19b-2 | CCAR1    | 0.333177179 | mirna_pc |
| 23034 | hsa-mir-19b-2 | UFM1     | 0.330395493 | mirna_pc |
| 23035 | hsa-mir-19b-2 | CDC16    | 0.343004336 | mirna_pc |
| 23036 | hsa-mir-19b-2 | ING1     | 0.312269413 | mirna_pc |
| 23037 | hsa-mir-19b-2 | RNF6     | 0.310653291 | mirna_pc |
| 23038 | hsa-mir-19b-2 | DHX15    | 0.334006536 | mirna_pc |
| 23039 | hsa-mir-19b-2 | MAP2K6   | 0.353556999 | mirna_pc |
| 23040 | hsa-mir-19b-2 | RBM26    | 0.385399738 | mirna_pc |
| 23041 | hsa-mir-19b-2 | ZNF92    | 0.331616149 | mirna_pc |
| 23042 | hsa-mir-19b-2 | TMTC4    | 0.361355942 | mirna_pc |
| 23043 | hsa-mir-19b-2 | AZIN1    | 0.372207017 | mirna_pc |
| 23044 | hsa-mir-19b-2 | IPO5     | 0.459706036 | mirna_pc |
| 23045 | hsa-mir-19b-2 | NUP43    | 0.303826629 | mirna_pc |
| 23046 | hsa-mir-19b-2 | CHD1L    | 0.302643228 | mirna_pc |
| 23047 | hsa-mir-19b-2 | SNRNP48  | 0.329259946 | mirna_pc |
| 23048 | hsa-mir-19b-2 | RFXAP    | 0.301591242 | mirna_pc |
| 23049 | hsa-mir-19b-2 | DCLRE1A  | 0.35313181  | mirna_pc |
| 23050 | hsa-mir-19b-2 | ANP32A   | 0.334853885 | mirna_pc |
| 23051 | hsa-mir-19b-2 | DIS3     | 0.368503555 | mirna_pc |
| 23052 | hsa-mir-19b-2 | E2F5     | 0.302495575 | mirna_pc |
| 23053 | hsa-mir-19b-2 | NUFIP1   | 0.40880479  | mirna_pc |
| 23054 | hsa-mir-19b-2 | ZNF195   | 0.401728527 | mirna_pc |
| 23055 | hsa-mir-19b-2 | BCAS2    | 0.347703902 | mirna_pc |
| 23056 | hsa-mir-19b-2 | FAM48A   | 0.356387618 | mirna_pc |
| 23057 | hsa-mir-19b-2 | PMS1     | 0.322431119 | mirna_pc |

|       |               |          |             |          |
|-------|---------------|----------|-------------|----------|
| 23058 | hsa-mir-19b-2 | PNN      | 0.317548698 | mirna_pc |
| 23059 | hsa-mir-19b-2 | PAN3     | 0.31721485  | mirna_pc |
| 23060 | hsa-mir-19b-2 | CCDC122  | 0.353466139 | mirna_pc |
| 23061 | hsa-mir-19b-2 | TRUB1    | 0.338189658 | mirna_pc |
| 23062 | hsa-mir-19b-2 | ZMYM2    | 0.328986361 | mirna_pc |
| 23063 | hsa-mir-19b-2 | CCNJ     | 0.350222335 | mirna_pc |
| 23064 | hsa-mir-19b-2 | ABCC4    | 0.320891251 | mirna_pc |
| 23065 | hsa-mir-19b-2 | KBTD6    | 0.3064278   | mirna_pc |
| 23066 | hsa-mir-19b-2 | ESF1     | 0.363466746 | mirna_pc |
| 23067 | hsa-mir-19b-2 | CTPS2    | 0.328743369 | mirna_pc |
| 23068 | hsa-mir-19b-2 | XPO4     | 0.414289254 | mirna_pc |
| 23069 | hsa-mir-19b-2 | SNCAIP   | 0.304611638 | mirna_pc |
| 23070 | hsa-mir-19b-2 | IFT88    | 0.420465576 | mirna_pc |
| 23071 | hsa-mir-19b-2 | QRSL1    | 0.333759969 | mirna_pc |
| 23072 | hsa-mir-19b-2 | FANCF    | 0.390307857 | mirna_pc |
| 23073 | hsa-mir-19b-2 | C2orf3   | 0.314539702 | mirna_pc |
| 23074 | hsa-mir-19b-2 | FAM119A  | 0.304922257 | mirna_pc |
| 23075 | hsa-mir-19b-2 | SCML2    | 0.360636171 | mirna_pc |
| 23076 | hsa-mir-19b-2 | MRPL19   | 0.322112983 | mirna_pc |
| 23077 | hsa-mir-19b-2 | ZCCHC3   | 0.410861099 | mirna_pc |
| 23078 | hsa-mir-19b-2 | RRP15    | 0.40010738  | mirna_pc |
| 23079 | hsa-mir-19b-2 | ADAT2    | 0.324681485 | mirna_pc |
| 23080 | hsa-mir-19b-2 | ETV5     | 0.324996787 | mirna_pc |
| 23081 | hsa-mir-19b-2 | CBLL1    | 0.327539165 | mirna_pc |
| 23082 | hsa-mir-19b-2 | GTF3A    | 0.349167037 | mirna_pc |
| 23083 | hsa-mir-19b-2 | TPP2     | 0.415063418 | mirna_pc |
| 23084 | hsa-mir-19b-2 | CEP57    | 0.312591174 | mirna_pc |
| 23085 | hsa-mir-19b-2 | MIR17HG  | 0.502529453 | mirna_pc |
| 23086 | hsa-mir-19b-2 | ZNF239   | 0.333368472 | mirna_pc |
| 23087 | hsa-mir-19b-2 | SFRS6    | 0.334880258 | mirna_pc |
| 23088 | hsa-mir-19b-2 | SLC4A5   | 0.31594374  | mirna_pc |
| 23089 | hsa-mir-19b-2 | DNMT3A   | 0.354217176 | mirna_pc |
| 23090 | hsa-mir-19b-2 | PRTFDC1  | 0.301772433 | mirna_pc |
| 23091 | hsa-mir-19b-2 | ZNF711   | 0.357528517 | mirna_pc |
| 23092 | hsa-mir-19b-2 | POM121   | 0.300586183 | mirna_pc |
| 23093 | hsa-mir-134   | CDC20    | 0.349411089 | mirna_pc |
| 23094 | hsa-mir-134   | PLK4     | 0.31175138  | mirna_pc |
| 23095 | hsa-mir-134   | BIRC5    | 0.306311485 | mirna_pc |
| 23096 | hsa-mir-134   | C6orf167 | 0.314330094 | mirna_pc |
| 23097 | hsa-mir-134   | PRR11    | 0.324120848 | mirna_pc |
| 23098 | hsa-mir-134   | EPRI     | 0.304814521 | mirna_pc |
| 23099 | hsa-mir-134   | CENPO    | 0.343792588 | mirna_pc |
| 23100 | hsa-mir-134   | CDCA4    | 0.339723407 | mirna_pc |
| 23101 | hsa-mir-134   | MEG3     | 0.636552934 | mirna_pc |
| 23102 | hsa-mir-134   | PPP3CC   | 0.305076846 | mirna_pc |
| 23103 | hsa-mir-134   | BMP1     | 0.494881994 | mirna_pc |
| 23104 | hsa-mir-134   | EIF5A    | 0.312788161 | mirna_pc |
| 23105 | hsa-mir-134   | FSCN1    | 0.319867259 | mirna_pc |
| 23106 | hsa-mir-134   | ISG15    | 0.347886557 | mirna_pc |
| 23107 | hsa-mir-134   | NEDD1    | 0.312979923 | mirna_pc |
| 23108 | hsa-mir-134   | ROR2     | 0.300628077 | mirna_pc |
| 23109 | hsa-mir-134   | LEPRE1   | 0.315301289 | mirna_pc |
| 23110 | hsa-mir-134   | EIF5AL1  | 0.302447858 | mirna_pc |
| 23111 | hsa-mir-134   | GJB3     | 0.303432928 | mirna_pc |



|                   |          |                      |
|-------------------|----------|----------------------|
| 23112 hsa-mir-134 | PMAIP1   | 0.321917855 mirna_pc |
| 23113 hsa-mir-134 | MT2A     | 0.347225383 mirna_pc |
| 23114 hsa-mir-134 | SH2D5    | 0.328299628 mirna_pc |
| 23115 hsa-mir-134 | MFAP2    | 0.387816198 mirna_pc |
| 23116 hsa-mir-134 | CD276    | 0.357302985 mirna_pc |
| 23117 hsa-mir-134 | IGF2BP2  | 0.367517988 mirna_pc |
| 23118 hsa-mir-134 | MAP4K4   | 0.300886423 mirna_pc |
| 23119 hsa-mir-134 | PCDHB4   | 0.304596043 mirna_pc |
| 23120 hsa-mir-134 | GBP1     | 0.323341254 mirna_pc |
| 23121 hsa-mir-134 | GJB4     | 0.336706269 mirna_pc |
| 23122 hsa-mir-134 | AK3L1    | 0.31149819 mirna_pc  |
| 23123 hsa-mir-134 | TNFAIP3  | 0.324143954 mirna_pc |
| 23124 hsa-mir-134 | IFIT3    | 0.352800647 mirna_pc |
| 23125 hsa-mir-134 | FJX1     | 0.317739203 mirna_pc |
| 23126 hsa-mir-134 | PXDN     | 0.319699369 mirna_pc |
| 23127 hsa-mir-134 | ITGA3    | 0.301197774 mirna_pc |
| 23128 hsa-mir-134 | PLEKHG2  | 0.304819476 mirna_pc |
| 23129 hsa-mir-134 | GPR176   | 0.3352555 mirna_pc   |
| 23130 hsa-mir-134 | NOV      | 0.310581266 mirna_pc |
| 23131 hsa-mir-134 | ITGA6    | 0.387156147 mirna_pc |
| 23132 hsa-mir-134 | WARS     | 0.300742869 mirna_pc |
| 23133 hsa-mir-134 | RPL39L   | 0.305257502 mirna_pc |
| 23134 hsa-mir-134 | LEPREL1  | 0.327709965 mirna_pc |
| 23135 hsa-mir-134 | DRAP1    | 0.327497703 mirna_pc |
| 23136 hsa-mir-134 | CHSY3    | 0.453291325 mirna_pc |
| 23137 hsa-mir-134 | FER      | 0.384008534 mirna_pc |
| 23138 hsa-mir-134 | KIAA0922 | 0.319813146 mirna_pc |
| 23139 hsa-mir-134 | PANX1    | 0.417692 mirna_pc    |
| 23140 hsa-mir-134 | KCNQ5    | 0.322801902 mirna_pc |
| 23141 hsa-mir-134 | EVC2     | 0.329192286 mirna_pc |
| 23142 hsa-mir-134 | ADAMTSL5 | 0.390460164 mirna_pc |
| 23143 hsa-mir-134 | C5orf13  | 0.325953555 mirna_pc |
| 23144 hsa-mir-134 | TUSC1    | 0.301719058 mirna_pc |
| 23145 hsa-mir-134 | KIAA1949 | 0.305902037 mirna_pc |
| 23146 hsa-mir-134 | IL12RB2  | 0.379026531 mirna_pc |
| 23147 hsa-mir-134 | MOBK2B   | 0.314999762 mirna_pc |
| 23148 hsa-mir-134 | COL17A1  | 0.353969148 mirna_pc |
| 23149 hsa-mir-134 | RPTOR    | 0.345571723 mirna_pc |
| 23150 hsa-mir-134 | PLS3     | 0.303482614 mirna_pc |
| 23151 hsa-mir-134 | MSN      | 0.302075474 mirna_pc |
| 23152 hsa-mir-134 | LY86     | 0.711232893 mirna_pc |
| 23153 hsa-mir-134 | ZFHX4    | 0.482324711 mirna_pc |
| 23154 hsa-mir-134 | ELK3     | 0.319481988 mirna_pc |
| 23155 hsa-mir-134 | SNAI2    | 0.413456051 mirna_pc |
| 23156 hsa-mir-134 | IRX4     | 0.357764538 mirna_pc |
| 23157 hsa-mir-134 | MARVELD1 | 0.33090302 mirna_pc  |
| 23158 hsa-mir-134 | ADM      | 0.316819626 mirna_pc |
| 23159 hsa-mir-134 | PHF23    | 0.307210003 mirna_pc |
| 23160 hsa-mir-134 | EGFLAM   | 0.332067898 mirna_pc |
| 23161 hsa-mir-134 | ESYT1    | 0.331384277 mirna_pc |
| 23162 hsa-mir-134 | FKBP14   | 0.325805712 mirna_pc |
| 23163 hsa-mir-134 | TULP4    | 0.322279321 mirna_pc |
| 23164 hsa-mir-134 | CD38     | 0.316370942 mirna_pc |
| 23165 hsa-mir-134 | GALNT14  | 0.349491665 mirna_pc |

|                   |           |                      |
|-------------------|-----------|----------------------|
| 23166 hsa-mir-134 | AFAP1L1   | 0.372497365 mirna_pc |
| 23167 hsa-mir-134 | BCAT1     | 0.390575405 mirna_pc |
| 23168 hsa-mir-134 | EXTL3     | 0.382438184 mirna_pc |
| 23169 hsa-mir-134 | KIRREL    | 0.364414911 mirna_pc |
| 23170 hsa-mir-134 | PXN       | 0.341757195 mirna_pc |
| 23171 hsa-mir-134 | ODZ3      | 0.449508662 mirna_pc |
| 23172 hsa-mir-134 | DHRS2     | 0.494351528 mirna_pc |
| 23173 hsa-mir-134 | AGPAT4    | 0.528827737 mirna_pc |
| 23174 hsa-mir-134 | LOC645166 | 0.525183499 mirna_pc |
| 23175 hsa-mir-134 | ODZ2      | 0.311123968 mirna_pc |
| 23176 hsa-mir-134 | MTAP      | 0.515926574 mirna_pc |
| 23177 hsa-mir-134 | MOBK12A   | 0.34560815 mirna_pc  |
| 23178 hsa-mir-134 | STK17A    | 0.324286525 mirna_pc |
| 23179 hsa-mir-134 | VEGFC     | 0.308564881 mirna_pc |
| 23180 hsa-mir-134 | H2AFY2    | 0.336731029 mirna_pc |
| 23181 hsa-mir-134 | PCDHB11   | 0.397228003 mirna_pc |
| 23182 hsa-mir-134 | FSTL3     | 0.422076335 mirna_pc |
| 23183 hsa-mir-134 | TIMM22    | 0.308794126 mirna_pc |
| 23184 hsa-mir-484 | TPX2      | 0.313328114 mirna_pc |
| 23185 hsa-mir-484 | KPNA2     | 0.386861607 mirna_pc |
| 23186 hsa-mir-484 | HOXC9     | 0.383185877 mirna_pc |
| 23187 hsa-mir-484 | RRM2      | 0.447581937 mirna_pc |
| 23188 hsa-mir-484 | CDC25C    | 0.314404696 mirna_pc |
| 23189 hsa-mir-484 | PLK1      | 0.352873707 mirna_pc |
| 23190 hsa-mir-484 | UBE2C     | 0.404313726 mirna_pc |
| 23191 hsa-mir-484 | BUB1      | 0.305631611 mirna_pc |
| 23192 hsa-mir-484 | BUB1B     | 0.331979961 mirna_pc |
| 23193 hsa-mir-484 | KIF18B    | 0.360637447 mirna_pc |
| 23194 hsa-mir-484 | KIF2C     | 0.316314131 mirna_pc |
| 23195 hsa-mir-484 | FANCA     | 0.366673548 mirna_pc |
| 23196 hsa-mir-484 | CDC20     | 0.341653941 mirna_pc |
| 23197 hsa-mir-484 | CLSPN     | 0.336192323 mirna_pc |
| 23198 hsa-mir-484 | CCNA2     | 0.341566726 mirna_pc |
| 23199 hsa-mir-484 | SPC25     | 0.316964827 mirna_pc |
| 23200 hsa-mir-484 | MND1      | 0.369351275 mirna_pc |
| 23201 hsa-mir-484 | KIF22     | 0.443541014 mirna_pc |
| 23202 hsa-mir-484 | DDX39     | 0.453173923 mirna_pc |
| 23203 hsa-mir-484 | NCAPH     | 0.345036388 mirna_pc |
| 23204 hsa-mir-484 | RAD54L    | 0.315496976 mirna_pc |
| 23205 hsa-mir-484 | CENPA     | 0.404422683 mirna_pc |
| 23206 hsa-mir-484 | MAD2L1    | 0.388218566 mirna_pc |
| 23207 hsa-mir-484 | TIMELESS  | 0.355914136 mirna_pc |
| 23208 hsa-mir-484 | LMNB1     | 0.344860991 mirna_pc |
| 23209 hsa-mir-484 | ASF1B     | 0.346588382 mirna_pc |
| 23210 hsa-mir-484 | TROAP     | 0.432318982 mirna_pc |
| 23211 hsa-mir-484 | CCNB1     | 0.348671393 mirna_pc |
| 23212 hsa-mir-484 | STMN1     | 0.343396357 mirna_pc |
| 23213 hsa-mir-484 | CENPM     | 0.313544584 mirna_pc |
| 23214 hsa-mir-484 | TK1       | 0.36816195 mirna_pc  |
| 23215 hsa-mir-484 | CDCA2     | 0.361179521 mirna_pc |
| 23216 hsa-mir-484 | DKC1      | 0.405410284 mirna_pc |
| 23217 hsa-mir-484 | TUBB      | 0.366477269 mirna_pc |
| 23218 hsa-mir-484 | KIAA0101  | 0.459304153 mirna_pc |
| 23219 hsa-mir-484 | ORC1L     | 0.303002328 mirna_pc |

|                   |           |                      |
|-------------------|-----------|----------------------|
| 23220 hsa-mir-484 | KNTC1     | 0.344318109 mirna_pc |
| 23221 hsa-mir-484 | CCNF      | 0.346249675 mirna_pc |
| 23222 hsa-mir-484 | CCNB2     | 0.326848786 mirna_pc |
| 23223 hsa-mir-484 | NUF2      | 0.360819942 mirna_pc |
| 23224 hsa-mir-484 | PLK4      | 0.394919664 mirna_pc |
| 23225 hsa-mir-484 | FANCB     | 0.337099004 mirna_pc |
| 23226 hsa-mir-484 | PTTG1     | 0.326497339 mirna_pc |
| 23227 hsa-mir-484 | SKA3      | 0.301957021 mirna_pc |
| 23228 hsa-mir-484 | HJURP     | 0.317106771 mirna_pc |
| 23229 hsa-mir-484 | BLM       | 0.303596849 mirna_pc |
| 23230 hsa-mir-484 | NME1      | 0.461217886 mirna_pc |
| 23231 hsa-mir-484 | DNMT1     | 0.355170652 mirna_pc |
| 23232 hsa-mir-484 | PAICS     | 0.354136961 mirna_pc |
| 23233 hsa-mir-484 | BIRC5     | 0.455349142 mirna_pc |
| 23234 hsa-mir-484 | RCC1      | 0.341348757 mirna_pc |
| 23235 hsa-mir-484 | OIP5      | 0.335372808 mirna_pc |
| 23236 hsa-mir-484 | EME1      | 0.364110238 mirna_pc |
| 23237 hsa-mir-484 | RECQL4    | 0.35645676 mirna_pc  |
| 23238 hsa-mir-484 | CENPK     | 0.332455558 mirna_pc |
| 23239 hsa-mir-484 | AURKB     | 0.406418027 mirna_pc |
| 23240 hsa-mir-484 | CDT1      | 0.372194527 mirna_pc |
| 23241 hsa-mir-484 | MCM10     | 0.314764069 mirna_pc |
| 23242 hsa-mir-484 | KIF20A    | 0.365550968 mirna_pc |
| 23243 hsa-mir-484 | CDCA3     | 0.421390775 mirna_pc |
| 23244 hsa-mir-484 | C1orf112  | 0.393800314 mirna_pc |
| 23245 hsa-mir-484 | ORC6L     | 0.4212089 mirna_pc   |
| 23246 hsa-mir-484 | ERH       | 0.350883271 mirna_pc |
| 23247 hsa-mir-484 | C16orf59  | 0.480941039 mirna_pc |
| 23248 hsa-mir-484 | CDKN3     | 0.312783576 mirna_pc |
| 23249 hsa-mir-484 | ADRM1     | 0.310017809 mirna_pc |
| 23250 hsa-mir-484 | NEIL3     | 0.334096287 mirna_pc |
| 23251 hsa-mir-484 | ACTL6A    | 0.446868893 mirna_pc |
| 23252 hsa-mir-484 | POLD1     | 0.360221521 mirna_pc |
| 23253 hsa-mir-484 | C12orf48  | 0.344800023 mirna_pc |
| 23254 hsa-mir-484 | HNRNPL    | 0.425263322 mirna_pc |
| 23255 hsa-mir-484 | SMC4      | 0.364594892 mirna_pc |
| 23256 hsa-mir-484 | PKMYT1    | 0.37212842 mirna_pc  |
| 23257 hsa-mir-484 | TTK       | 0.312440233 mirna_pc |
| 23258 hsa-mir-484 | SF3B4     | 0.3121044 mirna_pc   |
| 23259 hsa-mir-484 | TUBA1B    | 0.342331516 mirna_pc |
| 23260 hsa-mir-484 | HELLS     | 0.317783266 mirna_pc |
| 23261 hsa-mir-484 | POLE2     | 0.337156181 mirna_pc |
| 23262 hsa-mir-484 | UBE2S     | 0.381134791 mirna_pc |
| 23263 hsa-mir-484 | C11orf82  | 0.442300691 mirna_pc |
| 23264 hsa-mir-484 | HNRNPC    | 0.432567328 mirna_pc |
| 23265 hsa-mir-484 | PPIA      | 0.320435684 mirna_pc |
| 23266 hsa-mir-484 | C6orf167  | 0.309170591 mirna_pc |
| 23267 hsa-mir-484 | CHEK1     | 0.336414216 mirna_pc |
| 23268 hsa-mir-484 | HNRNPA2B1 | 0.336974866 mirna_pc |
| 23269 hsa-mir-484 | RAN       | 0.328609309 mirna_pc |
| 23270 hsa-mir-484 | TYMS      | 0.375936546 mirna_pc |
| 23271 hsa-mir-484 | C20orf20  | 0.376502865 mirna_pc |
| 23272 hsa-mir-484 | MCM6      | 0.305347669 mirna_pc |
| 23273 hsa-mir-484 | RNASEH2A  | 0.420083184 mirna_pc |

|                   |           |                      |
|-------------------|-----------|----------------------|
| 23274 hsa-mir-484 | PIF1      | 0.350048639 mirna_pc |
| 23275 hsa-mir-484 | H2AFX     | 0.318255915 mirna_pc |
| 23276 hsa-mir-484 | SFRS2     | 0.472859338 mirna_pc |
| 23277 hsa-mir-484 | UCK2      | 0.341124924 mirna_pc |
| 23278 hsa-mir-484 | NFKBIL2   | 0.389988753 mirna_pc |
| 23279 hsa-mir-484 | C15orf42  | 0.329507336 mirna_pc |
| 23280 hsa-mir-484 | CENPN     | 0.307958033 mirna_pc |
| 23281 hsa-mir-484 | SNRPG     | 0.438899178 mirna_pc |
| 23282 hsa-mir-484 | EIF4A3    | 0.414396528 mirna_pc |
| 23283 hsa-mir-484 | SNRPA     | 0.509353378 mirna_pc |
| 23284 hsa-mir-484 | FUS       | 0.453615059 mirna_pc |
| 23285 hsa-mir-484 | C1orf135  | 0.313160243 mirna_pc |
| 23286 hsa-mir-484 | U2AF2     | 0.344295549 mirna_pc |
| 23287 hsa-mir-484 | CHAF1A    | 0.435829383 mirna_pc |
| 23288 hsa-mir-484 | GINS4     | 0.487228191 mirna_pc |
| 23289 hsa-mir-484 | ANP32E    | 0.346471867 mirna_pc |
| 23290 hsa-mir-484 | CENPO     | 0.31461926 mirna_pc  |
| 23291 hsa-mir-484 | C19orf48  | 0.317649056 mirna_pc |
| 23292 hsa-mir-484 | GEN1      | 0.406184708 mirna_pc |
| 23293 hsa-mir-484 | NUDT1     | 0.345401366 mirna_pc |
| 23294 hsa-mir-484 | HMGB2     | 0.386459589 mirna_pc |
| 23295 hsa-mir-484 | GINS2     | 0.351017566 mirna_pc |
| 23296 hsa-mir-484 | DNA2      | 0.324215443 mirna_pc |
| 23297 hsa-mir-484 | NOP56     | 0.341479835 mirna_pc |
| 23298 hsa-mir-484 | SNHG1     | 0.344703035 mirna_pc |
| 23299 hsa-mir-484 | DTYMK     | 0.325957373 mirna_pc |
| 23300 hsa-mir-484 | PRMT1     | 0.448612158 mirna_pc |
| 23301 hsa-mir-484 | RAVER1    | 0.322313608 mirna_pc |
| 23302 hsa-mir-484 | HSPE1     | 0.306016421 mirna_pc |
| 23303 hsa-mir-484 | C16orf75  | 0.358747791 mirna_pc |
| 23304 hsa-mir-484 | C18orf56  | 0.358886563 mirna_pc |
| 23305 hsa-mir-484 | NOP2      | 0.384711258 mirna_pc |
| 23306 hsa-mir-484 | HIST1H2AE | 0.438103646 mirna_pc |
| 23307 hsa-mir-484 | CDK2      | 0.318311093 mirna_pc |
| 23308 hsa-mir-484 | CDK4      | 0.317981837 mirna_pc |
| 23309 hsa-mir-484 | PFDN2     | 0.422752515 mirna_pc |
| 23310 hsa-mir-484 | BCL2L12   | 0.383886133 mirna_pc |
| 23311 hsa-mir-484 | CHTF18    | 0.477206077 mirna_pc |
| 23312 hsa-mir-484 | HNRNPR    | 0.369215147 mirna_pc |
| 23313 hsa-mir-484 | DLEU2     | 0.459355208 mirna_pc |
| 23314 hsa-mir-484 | PRIM1     | 0.329012871 mirna_pc |
| 23315 hsa-mir-484 | KAT2A     | 0.436556329 mirna_pc |
| 23316 hsa-mir-484 | PSMC4     | 0.361954297 mirna_pc |
| 23317 hsa-mir-484 | TCOF1     | 0.391458909 mirna_pc |
| 23318 hsa-mir-484 | CHAF1B    | 0.310825109 mirna_pc |
| 23319 hsa-mir-484 | ACYP1     | 0.314605897 mirna_pc |
| 23320 hsa-mir-484 | DHX34     | 0.321380304 mirna_pc |
| 23321 hsa-mir-484 | HOXC10    | 0.31275387 mirna_pc  |
| 23322 hsa-mir-484 | G3BP1     | 0.309165691 mirna_pc |
| 23323 hsa-mir-484 | NOP58     | 0.395886666 mirna_pc |
| 23324 hsa-mir-484 | DBF4      | 0.474700095 mirna_pc |
| 23325 hsa-mir-484 | TOMM40    | 0.30658742 mirna_pc  |
| 23326 hsa-mir-484 | SF3B3     | 0.301421087 mirna_pc |
| 23327 hsa-mir-484 | CDC7      | 0.366583075 mirna_pc |

|                   |           |                      |
|-------------------|-----------|----------------------|
| 23328 hsa-mir-484 | NUP85     | 0.320258062 mirna_pc |
| 23329 hsa-mir-484 | YDJC      | 0.3196895 mirna_pc   |
| 23330 hsa-mir-484 | PUS1      | 0.340156937 mirna_pc |
| 23331 hsa-mir-484 | NOL11     | 0.33518572 mirna_pc  |
| 23332 hsa-mir-484 | SNRPC     | 0.345830528 mirna_pc |
| 23333 hsa-mir-484 | ARL6IP6   | 0.306919246 mirna_pc |
| 23334 hsa-mir-484 | HAUS8     | 0.343039728 mirna_pc |
| 23335 hsa-mir-484 | RFC4      | 0.348357257 mirna_pc |
| 23336 hsa-mir-484 | FBX05     | 0.378696974 mirna_pc |
| 23337 hsa-mir-484 | FIGNL1    | 0.409077395 mirna_pc |
| 23338 hsa-mir-484 | E2F3      | 0.32193125 mirna_pc  |
| 23339 hsa-mir-484 | SF3B14    | 0.309988887 mirna_pc |
| 23340 hsa-mir-484 | RUVBL2    | 0.309084622 mirna_pc |
| 23341 hsa-mir-484 | CDC25A    | 0.32748441 mirna_pc  |
| 23342 hsa-mir-484 | RAD54B    | 0.348746612 mirna_pc |
| 23343 hsa-mir-484 | H2AFZ     | 0.327695727 mirna_pc |
| 23344 hsa-mir-484 | MAGOH     | 0.3928097 mirna_pc   |
| 23345 hsa-mir-484 | DDX12     | 0.347290413 mirna_pc |
| 23346 hsa-mir-484 | NUP37     | 0.345644289 mirna_pc |
| 23347 hsa-mir-484 | CPSF3     | 0.436293831 mirna_pc |
| 23348 hsa-mir-484 | BANF1     | 0.410826596 mirna_pc |
| 23349 hsa-mir-484 | C21orf45  | 0.509057448 mirna_pc |
| 23350 hsa-mir-484 | PPM1G     | 0.384865665 mirna_pc |
| 23351 hsa-mir-484 | DNAJB11   | 0.383707217 mirna_pc |
| 23352 hsa-mir-484 | SNRPD2    | 0.353915525 mirna_pc |
| 23353 hsa-mir-484 | TFAP4     | 0.407992251 mirna_pc |
| 23354 hsa-mir-484 | NUDT5     | 0.367296526 mirna_pc |
| 23355 hsa-mir-484 | RNPS1     | 0.421767567 mirna_pc |
| 23356 hsa-mir-484 | DAZAP1    | 0.378536878 mirna_pc |
| 23357 hsa-mir-484 | BOLA2     | 0.340505506 mirna_pc |
| 23358 hsa-mir-484 | CBX8      | 0.359572103 mirna_pc |
| 23359 hsa-mir-484 | NCL       | 0.33993271 mirna_pc  |
| 23360 hsa-mir-484 | CALR      | 0.325155838 mirna_pc |
| 23361 hsa-mir-484 | PFDN4     | 0.322962541 mirna_pc |
| 23362 hsa-mir-484 | PAFAH1B3  | 0.450779474 mirna_pc |
| 23363 hsa-mir-484 | SRRT      | 0.437072484 mirna_pc |
| 23364 hsa-mir-484 | CACYBP    | 0.344493222 mirna_pc |
| 23365 hsa-mir-484 | SASS6     | 0.303169776 mirna_pc |
| 23366 hsa-mir-484 | DGUOK     | 0.462327144 mirna_pc |
| 23367 hsa-mir-484 | MRPL47    | 0.391382208 mirna_pc |
| 23368 hsa-mir-484 | DBF4B     | 0.302806212 mirna_pc |
| 23369 hsa-mir-484 | FBL       | 0.399006699 mirna_pc |
| 23370 hsa-mir-484 | EXOSC5    | 0.381894595 mirna_pc |
| 23371 hsa-mir-484 | HNRNPM    | 0.509391557 mirna_pc |
| 23372 hsa-mir-484 | TMPO      | 0.302500192 mirna_pc |
| 23373 hsa-mir-484 | CCT6A     | 0.37010262 mirna_pc  |
| 23374 hsa-mir-484 | POLR2H    | 0.356826867 mirna_pc |
| 23375 hsa-mir-484 | LOC388796 | 0.327240718 mirna_pc |
| 23376 hsa-mir-484 | VBP1      | 0.325167731 mirna_pc |
| 23377 hsa-mir-484 | C3orf26   | 0.327712633 mirna_pc |
| 23378 hsa-mir-484 | MRT04     | 0.366020043 mirna_pc |
| 23379 hsa-mir-484 | SHFM1     | 0.465845242 mirna_pc |
| 23380 hsa-mir-484 | GPR19     | 0.324711679 mirna_pc |
| 23381 hsa-mir-484 | LSM 7.00  | 0.327841579 mirna_pc |

|                   |              |                      |
|-------------------|--------------|----------------------|
| 23382 hsa-mir-484 | NUP93        | 0.306675838 mirna_pc |
| 23383 hsa-mir-484 | PPIH         | 0.415079344 mirna_pc |
| 23384 hsa-mir-484 | THOC6        | 0.414677841 mirna_pc |
| 23385 hsa-mir-484 | CCDC138      | 0.323960517 mirna_pc |
| 23386 hsa-mir-484 | LOC100128191 | 0.393084996 mirna_pc |
| 23387 hsa-mir-484 | SMYD5        | 0.431164618 mirna_pc |
| 23388 hsa-mir-484 | SF3A2        | 0.396397995 mirna_pc |
| 23389 hsa-mir-484 | TSSC1        | 0.363547855 mirna_pc |
| 23390 hsa-mir-484 | SNRPF        | 0.451920696 mirna_pc |
| 23391 hsa-mir-484 | SUMO2        | 0.471631648 mirna_pc |
| 23392 hsa-mir-484 | SFRS1        | 0.472030738 mirna_pc |
| 23393 hsa-mir-484 | WDR43        | 0.342910758 mirna_pc |
| 23394 hsa-mir-484 | SNRPA1       | 0.425463488 mirna_pc |
| 23395 hsa-mir-484 | SMC6         | 0.415912267 mirna_pc |
| 23396 hsa-mir-484 | UBE2I        | 0.4148299 mirna_pc   |
| 23397 hsa-mir-484 | TIPIN        | 0.427174855 mirna_pc |
| 23398 hsa-mir-484 | ATXN2L       | 0.334893454 mirna_pc |
| 23399 hsa-mir-484 | HSPBP1       | 0.424834082 mirna_pc |
| 23400 hsa-mir-484 | UTP14A       | 0.308315926 mirna_pc |
| 23401 hsa-mir-484 | ECE2         | 0.329717806 mirna_pc |
| 23402 hsa-mir-484 | MAZ          | 0.399982294 mirna_pc |
| 23403 hsa-mir-484 | POLR2D       | 0.314126652 mirna_pc |
| 23404 hsa-mir-484 | PA2G4        | 0.385051303 mirna_pc |
| 23405 hsa-mir-484 | SNRPD3       | 0.399731175 mirna_pc |
| 23406 hsa-mir-484 | KHDRBS1      | 0.38605164 mirna_pc  |
| 23407 hsa-mir-484 | SLC5A6       | 0.317536794 mirna_pc |
| 23408 hsa-mir-484 | B3GNT5       | 0.350479417 mirna_pc |
| 23409 hsa-mir-484 | CCDC18       | 0.338484236 mirna_pc |
| 23410 hsa-mir-484 | DNAJC2       | 0.336208955 mirna_pc |
| 23411 hsa-mir-484 | ZNF695       | 0.305217815 mirna_pc |
| 23412 hsa-mir-484 | METTL1       | 0.398660077 mirna_pc |
| 23413 hsa-mir-484 | NSUN5        | 0.369647153 mirna_pc |
| 23414 hsa-mir-484 | GNL2         | 0.329037791 mirna_pc |
| 23415 hsa-mir-484 | KRI1         | 0.420225833 mirna_pc |
| 23416 hsa-mir-484 | NOC2L        | 0.327303027 mirna_pc |
| 23417 hsa-mir-484 | NASP         | 0.380139747 mirna_pc |
| 23418 hsa-mir-484 | RPP40        | 0.381872916 mirna_pc |
| 23419 hsa-mir-484 | LAGE3        | 0.33037289 mirna_pc  |
| 23420 hsa-mir-484 | POLR1B       | 0.314106225 mirna_pc |
| 23421 hsa-mir-484 | OBFC2B       | 0.350635442 mirna_pc |
| 23422 hsa-mir-484 | PTMA         | 0.493080958 mirna_pc |
| 23423 hsa-mir-484 | LSM 4.00     | 0.317504245 mirna_pc |
| 23424 hsa-mir-484 | PSMB1        | 0.307468945 mirna_pc |
| 23425 hsa-mir-484 | TBCE         | 0.302468807 mirna_pc |
| 23426 hsa-mir-484 | FBX0220S     | 0.331622861 mirna_pc |
| 23427 hsa-mir-484 | SUV39H2      | 0.349085643 mirna_pc |
| 23428 hsa-mir-484 | NKRF         | 0.300162504 mirna_pc |
| 23429 hsa-mir-484 | NAALADL2     | 0.31410659 mirna_pc  |
| 23430 hsa-mir-484 | TMEM177      | 0.30642022 mirna_pc  |
| 23431 hsa-mir-484 | HNRNPD       | 0.424982445 mirna_pc |
| 23432 hsa-mir-484 | DPY30        | 0.416029795 mirna_pc |
| 23433 hsa-mir-484 | MTHFD2       | 0.310760896 mirna_pc |
| 23434 hsa-mir-484 | SFRS3        | 0.448159406 mirna_pc |
| 23435 hsa-mir-484 | CCT4         | 0.332883169 mirna_pc |

|                   |          |                      |
|-------------------|----------|----------------------|
| 23436 hsa-mir-484 | RAD9A    | 0.336931221 mirna_pc |
| 23437 hsa-mir-484 | ELAVL1   | 0.374652235 mirna_pc |
| 23438 hsa-mir-484 | ABCE1    | 0.351036476 mirna_pc |
| 23439 hsa-mir-484 | NCAPD3   | 0.424975533 mirna_pc |
| 23440 hsa-mir-484 | HSP90B1  | 0.358954951 mirna_pc |
| 23441 hsa-mir-484 | TRMT1    | 0.358522403 mirna_pc |
| 23442 hsa-mir-484 | TBC1D7   | 0.380336937 mirna_pc |
| 23443 hsa-mir-484 | PAK1IP1  | 0.377046513 mirna_pc |
| 23444 hsa-mir-484 | PFDN6    | 0.351970921 mirna_pc |
| 23445 hsa-mir-484 | ATP13A3  | 0.316600924 mirna_pc |
| 23446 hsa-mir-484 | YWHAE    | 0.335722375 mirna_pc |
| 23447 hsa-mir-484 | C3orf57  | 0.316155254 mirna_pc |
| 23448 hsa-mir-484 | ILF3     | 0.371687587 mirna_pc |
| 23449 hsa-mir-484 | HNRNPAB  | 0.343415457 mirna_pc |
| 23450 hsa-mir-484 | MAGOHB   | 0.383971094 mirna_pc |
| 23451 hsa-mir-484 | PASK     | 0.310334448 mirna_pc |
| 23452 hsa-mir-484 | IL8      | 0.346251871 mirna_pc |
| 23453 hsa-mir-484 | KHSRP    | 0.394730968 mirna_pc |
| 23454 hsa-mir-484 | LSM 6.00 | 0.464277672 mirna_pc |
| 23455 hsa-mir-484 | MRPS17   | 0.390867541 mirna_pc |
| 23456 hsa-mir-484 | GLO1     | 0.305228357 mirna_pc |
| 23457 hsa-mir-484 | WDR74    | 0.332864165 mirna_pc |
| 23458 hsa-mir-484 | TRA2B    | 0.370962727 mirna_pc |
| 23459 hsa-mir-484 | GAR1     | 0.381670898 mirna_pc |
| 23460 hsa-mir-484 | C15orf23 | 0.338321958 mirna_pc |
| 23461 hsa-mir-484 | WBSCR22  | 0.321759143 mirna_pc |
| 23462 hsa-mir-484 | RPL36A   | 0.354103307 mirna_pc |
| 23463 hsa-mir-484 | PSMD12   | 0.38551333 mirna_pc  |
| 23464 hsa-mir-484 | NOC4L    | 0.310365468 mirna_pc |
| 23465 hsa-mir-484 | ZNF668   | 0.378940294 mirna_pc |
| 23466 hsa-mir-484 | MRPL17   | 0.311296694 mirna_pc |
| 23467 hsa-mir-484 | ITGB3BP  | 0.352462681 mirna_pc |
| 23468 hsa-mir-484 | ENOPH1   | 0.370329569 mirna_pc |
| 23469 hsa-mir-484 | C19orf47 | 0.385117589 mirna_pc |
| 23470 hsa-mir-484 | TSEN54   | 0.321708622 mirna_pc |
| 23471 hsa-mir-484 | C4orf43  | 0.338094944 mirna_pc |
| 23472 hsa-mir-484 | TGIF1    | 0.305076681 mirna_pc |
| 23473 hsa-mir-484 | DDX55    | 0.336094979 mirna_pc |
| 23474 hsa-mir-484 | CXCL1    | 0.382062028 mirna_pc |
| 23475 hsa-mir-484 | PLEKHG4  | 0.326606477 mirna_pc |
| 23476 hsa-mir-484 | TMEM223  | 0.305534619 mirna_pc |
| 23477 hsa-mir-484 | SFPQ     | 0.378798753 mirna_pc |
| 23478 hsa-mir-484 | AP3M2    | 0.306698067 mirna_pc |
| 23479 hsa-mir-484 | CNOT3    | 0.334739143 mirna_pc |
| 23480 hsa-mir-484 | VPS72    | 0.313032442 mirna_pc |
| 23481 hsa-mir-484 | EIF4EBP1 | 0.435042062 mirna_pc |
| 23482 hsa-mir-484 | HDAC2    | 0.37319699 mirna_pc  |
| 23483 hsa-mir-484 | GMNN     | 0.322098477 mirna_pc |
| 23484 hsa-mir-484 | EMG1     | 0.313931984 mirna_pc |
| 23485 hsa-mir-484 | PA2G4P4  | 0.338898093 mirna_pc |
| 23486 hsa-mir-484 | WDR53    | 0.319880513 mirna_pc |
| 23487 hsa-mir-484 | PDAP1    | 0.530234361 mirna_pc |
| 23488 hsa-mir-484 | RNF7     | 0.432739492 mirna_pc |
| 23489 hsa-mir-484 | GEMIN6   | 0.472917554 mirna_pc |

|                   |           |                      |
|-------------------|-----------|----------------------|
| 23490 hsa-mir-484 | RPL26L1   | 0.311048633 mirna_pc |
| 23491 hsa-mir-484 | H3F3B     | 0.301130941 mirna_pc |
| 23492 hsa-mir-484 | MRPL11    | 0.31894802 mirna_pc  |
| 23493 hsa-mir-484 | FAM86C    | 0.307282413 mirna_pc |
| 23494 hsa-mir-484 | PTCD1     | 0.497343572 mirna_pc |
| 23495 hsa-mir-484 | PCGF1     | 0.320812475 mirna_pc |
| 23496 hsa-mir-484 | HPRT1     | 0.341538826 mirna_pc |
| 23497 hsa-mir-484 | CRIPT     | 0.315001332 mirna_pc |
| 23498 hsa-mir-484 | MSH6      | 0.304790742 mirna_pc |
| 23499 hsa-mir-484 | SOX4      | 0.303390529 mirna_pc |
| 23500 hsa-mir-484 | C3orf34   | 0.320357378 mirna_pc |
| 23501 hsa-mir-484 | TPRKB     | 0.440203188 mirna_pc |
| 23502 hsa-mir-484 | IRF3      | 0.308282389 mirna_pc |
| 23503 hsa-mir-484 | MRPL18    | 0.418818384 mirna_pc |
| 23504 hsa-mir-484 | POLB      | 0.434610154 mirna_pc |
| 23505 hsa-mir-484 | HNRNPA1   | 0.38957495 mirna_pc  |
| 23506 hsa-mir-484 | NPM1      | 0.378803847 mirna_pc |
| 23507 hsa-mir-484 | CDK2AP1   | 0.32991219 mirna_pc  |
| 23508 hsa-mir-484 | NUDT3     | 0.371411251 mirna_pc |
| 23509 hsa-mir-484 | MOGS      | 0.34662573 mirna_pc  |
| 23510 hsa-mir-484 | ATP5J2    | 0.512921865 mirna_pc |
| 23511 hsa-mir-484 | TNFAIP3   | 0.330112797 mirna_pc |
| 23512 hsa-mir-484 | COIL      | 0.347944991 mirna_pc |
| 23513 hsa-mir-484 | PPAN      | 0.364993538 mirna_pc |
| 23514 hsa-mir-484 | RFC2      | 0.337845928 mirna_pc |
| 23515 hsa-mir-484 | BUD31     | 0.490212829 mirna_pc |
| 23516 hsa-mir-484 | KARS      | 0.302798732 mirna_pc |
| 23517 hsa-mir-484 | C16orf88  | 0.591689069 mirna_pc |
| 23518 hsa-mir-484 | FAM58A    | 0.300120704 mirna_pc |
| 23519 hsa-mir-484 | HNRNPA1L2 | 0.389909795 mirna_pc |
| 23520 hsa-mir-484 | NAA15     | 0.326528536 mirna_pc |
| 23521 hsa-mir-484 | POLR3K    | 0.36953262 mirna_pc  |
| 23522 hsa-mir-484 | LOC642846 | 0.317870457 mirna_pc |
| 23523 hsa-mir-484 | PRPF31    | 0.317269018 mirna_pc |
| 23524 hsa-mir-484 | FARSB     | 0.327717216 mirna_pc |
| 23525 hsa-mir-484 | THUMPD2   | 0.381060294 mirna_pc |
| 23526 hsa-mir-484 | TARBP2    | 0.307288011 mirna_pc |
| 23527 hsa-mir-484 | FGFR1OP   | 0.301740367 mirna_pc |
| 23528 hsa-mir-484 | CCDC142   | 0.347055609 mirna_pc |
| 23529 hsa-mir-484 | SNHG9     | 0.394597158 mirna_pc |
| 23530 hsa-mir-484 | TCP1      | 0.344177868 mirna_pc |
| 23531 hsa-mir-484 | C16orf53  | 0.448160401 mirna_pc |
| 23532 hsa-mir-484 | NOL10     | 0.47149982 mirna_pc  |
| 23533 hsa-mir-484 | CTU1      | 0.362937506 mirna_pc |
| 23534 hsa-mir-484 | POLE      | 0.381238942 mirna_pc |
| 23535 hsa-mir-484 | MUTYH     | 0.339054967 mirna_pc |
| 23536 hsa-mir-484 | AUP1      | 0.340919814 mirna_pc |
| 23537 hsa-mir-484 | WRNIP1    | 0.346936296 mirna_pc |
| 23538 hsa-mir-484 | TAF1B     | 0.380549749 mirna_pc |
| 23539 hsa-mir-484 | TIMM50    | 0.402240581 mirna_pc |
| 23540 hsa-mir-484 | SNORD1C   | 0.361940647 mirna_pc |
| 23541 hsa-mir-484 | XRCC6BP1  | 0.327874506 mirna_pc |
| 23542 hsa-mir-484 | RPP21     | 0.325962531 mirna_pc |
| 23543 hsa-mir-484 | VRK1      | 0.355459731 mirna_pc |



|                   |           |                      |
|-------------------|-----------|----------------------|
| 23544 hsa-mir-484 | RBMX2     | 0.328205712 mirna_pc |
| 23545 hsa-mir-484 | DDOST     | 0.304927458 mirna_pc |
| 23546 hsa-mir-484 | EXOSC9    | 0.412445926 mirna_pc |
| 23547 hsa-mir-484 | TMEM60    | 0.311390227 mirna_pc |
| 23548 hsa-mir-484 | MXD3      | 0.318572557 mirna_pc |
| 23549 hsa-mir-484 | MPHOSPH6  | 0.305205597 mirna_pc |
| 23550 hsa-mir-484 | ZNF598    | 0.335804097 mirna_pc |
| 23551 hsa-mir-484 | RBMX      | 0.447105048 mirna_pc |
| 23552 hsa-mir-484 | C19orf53  | 0.330761431 mirna_pc |
| 23553 hsa-mir-484 | TEL02     | 0.393190314 mirna_pc |
| 23554 hsa-mir-484 | TMC06     | 0.360502164 mirna_pc |
| 23555 hsa-mir-484 | ALKBH2    | 0.384843313 mirna_pc |
| 23556 hsa-mir-484 | NTHL1     | 0.355600189 mirna_pc |
| 23557 hsa-mir-484 | POP5      | 0.358126446 mirna_pc |
| 23558 hsa-mir-484 | NETO2     | 0.301671916 mirna_pc |
| 23559 hsa-mir-484 | CCDC90A   | 0.301118398 mirna_pc |
| 23560 hsa-mir-484 | PRKCSH    | 0.379001953 mirna_pc |
| 23561 hsa-mir-484 | MLF 2.00  | 0.315691528 mirna_pc |
| 23562 hsa-mir-484 | ATAD3B    | 0.30769711 mirna_pc  |
| 23563 hsa-mir-484 | RPF2      | 0.352012436 mirna_pc |
| 23564 hsa-mir-484 | NHLRC1    | 0.331927352 mirna_pc |
| 23565 hsa-mir-484 | CCDC24    | 0.310154115 mirna_pc |
| 23566 hsa-mir-484 | PDIA6     | 0.390444221 mirna_pc |
| 23567 hsa-mir-484 | GPN3      | 0.322298163 mirna_pc |
| 23568 hsa-mir-484 | MEMO1     | 0.47172994 mirna_pc  |
| 23569 hsa-mir-484 | LOC440905 | 0.380762764 mirna_pc |
| 23570 hsa-mir-484 | TRAP1     | 0.375154626 mirna_pc |
| 23571 hsa-mir-484 | SCLT1     | 0.341847409 mirna_pc |
| 23572 hsa-mir-484 | LTV1      | 0.359815336 mirna_pc |
| 23573 hsa-mir-484 | OSTC      | 0.41291979 mirna_pc  |
| 23574 hsa-mir-484 | CCT8      | 0.34561056 mirna_pc  |
| 23575 hsa-mir-484 | TTC32     | 0.403992948 mirna_pc |
| 23576 hsa-mir-484 | SMN2      | 0.40495404 mirna_pc  |
| 23577 hsa-mir-484 | U2AF1     | 0.44804921 mirna_pc  |
| 23578 hsa-mir-484 | FAM92A1   | 0.333315519 mirna_pc |
| 23579 hsa-mir-484 | RPL38     | 0.306400368 mirna_pc |
| 23580 hsa-mir-484 | MST01     | 0.329729159 mirna_pc |
| 23581 hsa-mir-484 | RBM17     | 0.324061895 mirna_pc |
| 23582 hsa-mir-484 | ANAPC10   | 0.354693685 mirna_pc |
| 23583 hsa-mir-484 | ABT1      | 0.424141574 mirna_pc |
| 23584 hsa-mir-484 | FAM86A    | 0.412313535 mirna_pc |
| 23585 hsa-mir-484 | MPHOSPH10 | 0.378217474 mirna_pc |
| 23586 hsa-mir-484 | AKAP9     | 0.443542905 mirna_pc |
| 23587 hsa-mir-484 | RPS7      | 0.317128563 mirna_pc |
| 23588 hsa-mir-484 | MKRN3     | 0.318560862 mirna_pc |
| 23589 hsa-mir-484 | PABPN1    | 0.39010198 mirna_pc  |
| 23590 hsa-mir-484 | C14orf169 | 0.331929573 mirna_pc |
| 23591 hsa-mir-484 | METAP2    | 0.33758152 mirna_pc  |
| 23592 hsa-mir-484 | TIMM16    | 0.432520852 mirna_pc |
| 23593 hsa-mir-484 | MRPS28    | 0.304704345 mirna_pc |
| 23594 hsa-mir-484 | NUDCD2    | 0.34071586 mirna_pc  |
| 23595 hsa-mir-484 | NAT9      | 0.42043242 mirna_pc  |
| 23596 hsa-mir-484 | MRPL21    | 0.373886063 mirna_pc |
| 23597 hsa-mir-484 | ANKS3     | 0.328826094 mirna_pc |

|                   |            |                      |
|-------------------|------------|----------------------|
| 23598 hsa-mir-484 | BTG3       | 0.346319616 mirna_pc |
| 23599 hsa-mir-484 | LOC645332  | 0.387133079 mirna_pc |
| 23600 hsa-mir-484 | PRSS21     | 0.348796604 mirna_pc |
| 23601 hsa-mir-484 | MGC72080   | 0.514082222 mirna_pc |
| 23602 hsa-mir-484 | MCF2L2     | 0.332558001 mirna_pc |
| 23603 hsa-mir-484 | TRRAP      | 0.373147318 mirna_pc |
| 23604 hsa-mir-484 | TRMT61B    | 0.325748213 mirna_pc |
| 23605 hsa-mir-484 | TSFM       | 0.31221571 mirna_pc  |
| 23606 hsa-mir-484 | QTRT1      | 0.339715707 mirna_pc |
| 23607 hsa-mir-484 | SLC25A13   | 0.437572214 mirna_pc |
| 23608 hsa-mir-484 | DDX20      | 0.355660758 mirna_pc |
| 23609 hsa-mir-484 | KRT15      | 0.349685762 mirna_pc |
| 23610 hsa-mir-484 | DCUN1D1    | 0.301535931 mirna_pc |
| 23611 hsa-mir-484 | LUC7L      | 0.31203074 mirna_pc  |
| 23612 hsa-mir-484 | UBE2N      | 0.338818408 mirna_pc |
| 23613 hsa-mir-484 | CHCHD2     | 0.328920557 mirna_pc |
| 23614 hsa-mir-484 | BAZ1B      | 0.306396316 mirna_pc |
| 23615 hsa-mir-484 | ZNF593     | 0.301705948 mirna_pc |
| 23616 hsa-mir-484 | HTRA2      | 0.309059365 mirna_pc |
| 23617 hsa-mir-484 | CHAC2      | 0.319532476 mirna_pc |
| 23618 hsa-mir-484 | ACN9       | 0.457386606 mirna_pc |
| 23619 hsa-mir-484 | TCERG1     | 0.346639956 mirna_pc |
| 23620 hsa-mir-484 | C14orf156  | 0.334636303 mirna_pc |
| 23621 hsa-mir-484 | INTU       | 0.380028988 mirna_pc |
| 23622 hsa-mir-484 | NHP2L1     | 0.347288825 mirna_pc |
| 23623 hsa-mir-484 | MAPKAPK5   | 0.307417316 mirna_pc |
| 23624 hsa-mir-484 | E2F6       | 0.327479263 mirna_pc |
| 23625 hsa-mir-484 | SSSCA1     | 0.319994376 mirna_pc |
| 23626 hsa-mir-484 | NOL7       | 0.372483623 mirna_pc |
| 23627 hsa-mir-484 | PRPSAP2    | 0.356009978 mirna_pc |
| 23628 hsa-mir-484 | CPSF4      | 0.526072126 mirna_pc |
| 23629 hsa-mir-484 | SFRS13A    | 0.365622574 mirna_pc |
| 23630 hsa-mir-484 | GADD45GIP1 | 0.359919285 mirna_pc |
| 23631 hsa-mir-484 | C16orf91   | 0.302004118 mirna_pc |
| 23632 hsa-mir-484 | NT5C       | 0.374276413 mirna_pc |
| 23633 hsa-mir-484 | PTMS       | 0.326809054 mirna_pc |
| 23634 hsa-mir-484 | CTU2       | 0.350800842 mirna_pc |
| 23635 hsa-mir-484 | CCDC59     | 0.355101029 mirna_pc |
| 23636 hsa-mir-484 | SLC4A1AP   | 0.338822952 mirna_pc |
| 23637 hsa-mir-484 | TTC27      | 0.389124898 mirna_pc |
| 23638 hsa-mir-484 | DHRS13     | 0.321162761 mirna_pc |
| 23639 hsa-mir-484 | MCCC1      | 0.338368543 mirna_pc |
| 23640 hsa-mir-484 | MTIF2      | 0.369238674 mirna_pc |
| 23641 hsa-mir-484 | CDK2AP2    | 0.347809988 mirna_pc |
| 23642 hsa-mir-484 | KRTCAP3    | 0.320511493 mirna_pc |
| 23643 hsa-mir-484 | MRPS34     | 0.384752054 mirna_pc |
| 23644 hsa-mir-484 | LOC222699  | 0.395146081 mirna_pc |
| 23645 hsa-mir-484 | KCNMB3     | 0.449820916 mirna_pc |
| 23646 hsa-mir-484 | HIST1H1C   | 0.426288873 mirna_pc |
| 23647 hsa-mir-484 | AAAS       | 0.427547933 mirna_pc |
| 23648 hsa-mir-484 | C11orf24   | 0.386991468 mirna_pc |
| 23649 hsa-mir-484 | C2orf79    | 0.323860737 mirna_pc |
| 23650 hsa-mir-484 | SUPT7L     | 0.341525178 mirna_pc |
| 23651 hsa-mir-484 | PEMT       | 0.340094668 mirna_pc |

|                   |           |                      |
|-------------------|-----------|----------------------|
| 23652 hsa-mir-484 | SETD1A    | 0.301020223 mirna_pc |
| 23653 hsa-mir-484 | METTL5    | 0.36011348 mirna_pc  |
| 23654 hsa-mir-484 | ZNF277    | 0.372698139 mirna_pc |
| 23655 hsa-mir-484 | PELP1     | 0.340059019 mirna_pc |
| 23656 hsa-mir-484 | PGP       | 0.3929092 mirna_pc   |
| 23657 hsa-mir-484 | THOC1     | 0.365221037 mirna_pc |
| 23658 hsa-mir-484 | C11orf45  | 0.333383439 mirna_pc |
| 23659 hsa-mir-484 | CCDC15    | 0.332990487 mirna_pc |
| 23660 hsa-mir-484 | GCDH      | 0.347251827 mirna_pc |
| 23661 hsa-mir-484 | SFRS7     | 0.50280845 mirna_pc  |
| 23662 hsa-mir-484 | SLC25A19  | 0.304015129 mirna_pc |
| 23663 hsa-mir-484 | MYL12B    | 0.345637514 mirna_pc |
| 23664 hsa-mir-484 | IFRD1     | 0.352121128 mirna_pc |
| 23665 hsa-mir-484 | PHKG2     | 0.319013644 mirna_pc |
| 23666 hsa-mir-484 | SARS2     | 0.38057809 mirna_pc  |
| 23667 hsa-mir-484 | COQ3      | 0.331989609 mirna_pc |
| 23668 hsa-mir-484 | PDCD2     | 0.375432209 mirna_pc |
| 23669 hsa-mir-484 | CORO1B    | 0.309851259 mirna_pc |
| 23670 hsa-mir-484 | ANKIB1    | 0.350126628 mirna_pc |
| 23671 hsa-mir-484 | RPUSD2    | 0.317152541 mirna_pc |
| 23672 hsa-mir-484 | THYN1     | 0.423920287 mirna_pc |
| 23673 hsa-mir-484 | MRPL28    | 0.356492279 mirna_pc |
| 23674 hsa-mir-484 | C2orf68   | 0.314271663 mirna_pc |
| 23675 hsa-mir-484 | NDUFC1    | 0.322593585 mirna_pc |
| 23676 hsa-mir-484 | ARPC1A    | 0.409260343 mirna_pc |
| 23677 hsa-mir-484 | FLJ35776  | 0.311137355 mirna_pc |
| 23678 hsa-mir-484 | C17orf75  | 0.363812897 mirna_pc |
| 23679 hsa-mir-484 | TMEM93    | 0.310194052 mirna_pc |
| 23680 hsa-mir-484 | INO80E    | 0.360638314 mirna_pc |
| 23681 hsa-mir-484 | NPRL3     | 0.358331096 mirna_pc |
| 23682 hsa-mir-484 | MYST1     | 0.307395732 mirna_pc |
| 23683 hsa-mir-484 | ZNF789    | 0.387315312 mirna_pc |
| 23684 hsa-mir-484 | ZNF771    | 0.310448086 mirna_pc |
| 23685 hsa-mir-484 | EEF1E1    | 0.42034915 mirna_pc  |
| 23686 hsa-mir-484 | PGRMC1    | 0.329736456 mirna_pc |
| 23687 hsa-mir-484 | MRPL38    | 0.396696044 mirna_pc |
| 23688 hsa-mir-484 | YBX1      | 0.320333662 mirna_pc |
| 23689 hsa-mir-484 | ATPBD4    | 0.35106239 mirna_pc  |
| 23690 hsa-mir-484 | ZKSCAN5   | 0.440586521 mirna_pc |
| 23691 hsa-mir-484 | POLR2C    | 0.350935137 mirna_pc |
| 23692 hsa-mir-484 | C12orf10  | 0.37700259 mirna_pc  |
| 23693 hsa-mir-484 | FAM100A   | 0.331214441 mirna_pc |
| 23694 hsa-mir-484 | CLEC2B    | 0.321239798 mirna_pc |
| 23695 hsa-mir-484 | C12orf45  | 0.401382564 mirna_pc |
| 23696 hsa-mir-484 | LOC147727 | 0.316232081 mirna_pc |
| 23697 hsa-mir-484 | RING1     | 0.342004112 mirna_pc |
| 23698 hsa-mir-484 | SUMF2     | 0.306177914 mirna_pc |
| 23699 hsa-mir-484 | C22orf27  | 0.306775148 mirna_pc |
| 23700 hsa-mir-484 | PNKP      | 0.329947973 mirna_pc |
| 23701 hsa-mir-484 | C16orf13  | 0.407975972 mirna_pc |
| 23702 hsa-mir-484 | RSL1D1    | 0.315132242 mirna_pc |
| 23703 hsa-mir-484 | GBAS      | 0.301879236 mirna_pc |
| 23704 hsa-mir-484 | AIP       | 0.304838633 mirna_pc |
| 23705 hsa-mir-484 | BOLA3     | 0.489982392 mirna_pc |

|                   |              |                      |
|-------------------|--------------|----------------------|
| 23706 hsa-mir-484 | C19orf23     | 0.364026073 mirna_pc |
| 23707 hsa-mir-484 | MYL6B        | 0.376738874 mirna_pc |
| 23708 hsa-mir-484 | POLR2F       | 0.317211802 mirna_pc |
| 23709 hsa-mir-484 | MYL12A       | 0.308978993 mirna_pc |
| 23710 hsa-mir-484 | CAMTA1       | 0.318423928 mirna_pc |
| 23711 hsa-mir-484 | MRPS15       | 0.357739638 mirna_pc |
| 23712 hsa-mir-484 | C17orf58     | 0.327121771 mirna_pc |
| 23713 hsa-mir-484 | BET1         | 0.38801493 mirna_pc  |
| 23714 hsa-mir-484 | NARS2        | 0.382806626 mirna_pc |
| 23715 hsa-mir-484 | LYRM4        | 0.413832935 mirna_pc |
| 23716 hsa-mir-484 | FAM133B      | 0.483110691 mirna_pc |
| 23717 hsa-mir-484 | BCL11A       | 0.317888677 mirna_pc |
| 23718 hsa-mir-484 | ANP32A       | 0.311305765 mirna_pc |
| 23719 hsa-mir-484 | RBM25        | 0.306165463 mirna_pc |
| 23720 hsa-mir-484 | CFDP1        | 0.341481103 mirna_pc |
| 23721 hsa-mir-484 | C17orf81     | 0.331924201 mirna_pc |
| 23722 hsa-mir-484 | HYLS1        | 0.356227191 mirna_pc |
| 23723 hsa-mir-484 | WTAP         | 0.319958547 mirna_pc |
| 23724 hsa-mir-484 | SNF8         | 0.390623962 mirna_pc |
| 23725 hsa-mir-484 | C1orf156     | 0.336565094 mirna_pc |
| 23726 hsa-mir-484 | LOC100132287 | 0.311720907 mirna_pc |
| 23727 hsa-mir-484 | HNRNPA0      | 0.31244309 mirna_pc  |
| 23728 hsa-mir-484 | ZNF300       | 0.321695906 mirna_pc |
| 23729 hsa-mir-484 | MORN2        | 0.393017104 mirna_pc |
| 23730 hsa-mir-484 | DERL2        | 0.302779021 mirna_pc |
| 23731 hsa-mir-484 | C6orf125     | 0.332068809 mirna_pc |
| 23732 hsa-mir-484 | MESDC2       | 0.322804076 mirna_pc |
| 23733 hsa-mir-484 | MTERF        | 0.515980831 mirna_pc |
| 23734 hsa-mir-484 | ATP5H        | 0.311613018 mirna_pc |
| 23735 hsa-mir-484 | C7orf64      | 0.38781223 mirna_pc  |
| 23736 hsa-mir-484 | NDUFA12      | 0.303726502 mirna_pc |
| 23737 hsa-mir-484 | DRG2         | 0.310168752 mirna_pc |
| 23738 hsa-mir-484 | SLC25A33     | 0.365785605 mirna_pc |
| 23739 hsa-mir-484 | CXCL2        | 0.328137122 mirna_pc |
| 23740 hsa-mir-484 | OST4         | 0.340074027 mirna_pc |
| 23741 hsa-mir-484 | BCS1L        | 0.376987517 mirna_pc |
| 23742 hsa-mir-484 | ZNF394       | 0.411564805 mirna_pc |
| 23743 hsa-mir-484 | DDX51        | 0.348445788 mirna_pc |
| 23744 hsa-mir-484 | WDR83        | 0.382781315 mirna_pc |
| 23745 hsa-mir-484 | CCDC101      | 0.364590142 mirna_pc |
| 23746 hsa-mir-484 | NUBP2        | 0.332280743 mirna_pc |
| 23747 hsa-mir-484 | ENO3         | 0.349741824 mirna_pc |
| 23748 hsa-mir-484 | CCDC90B      | 0.374125354 mirna_pc |
| 23749 hsa-mir-484 | CCL2         | 0.329188377 mirna_pc |
| 23750 hsa-mir-484 | MRPL1        | 0.335829228 mirna_pc |
| 23751 hsa-mir-484 | SOD1         | 0.300171519 mirna_pc |
| 23752 hsa-mir-484 | API5         | 0.308932096 mirna_pc |
| 23753 hsa-mir-484 | C2orf3       | 0.355006355 mirna_pc |
| 23754 hsa-mir-484 | CHD4         | 0.304272028 mirna_pc |
| 23755 hsa-mir-484 | KRIT1        | 0.419138504 mirna_pc |
| 23756 hsa-mir-484 | DHRS2        | 0.413360255 mirna_pc |
| 23757 hsa-mir-484 | FGFBP3       | 0.306749131 mirna_pc |
| 23758 hsa-mir-484 | DNAJC19      | 0.472836213 mirna_pc |
| 23759 hsa-mir-484 | TMEM134      | 0.332343573 mirna_pc |

|                     |            |                      |
|---------------------|------------|----------------------|
| 23760 hsa-mir-484   | MRPS7      | 0.313874384 mirna_pc |
| 23761 hsa-mir-484   | SAPS3      | 0.335705098 mirna_pc |
| 23762 hsa-mir-484   | PEX1       | 0.392415395 mirna_pc |
| 23763 hsa-mir-484   | OAZ1       | 0.345760228 mirna_pc |
| 23764 hsa-mir-484   | TIMM44     | 0.307724941 mirna_pc |
| 23765 hsa-mir-484   | NDUFA7     | 0.302486738 mirna_pc |
| 23766 hsa-mir-484   | DIS3L2     | 0.335789745 mirna_pc |
| 23767 hsa-mir-484   | FAM18B2    | 0.311620247 mirna_pc |
| 23768 hsa-mir-484   | MRPL19     | 0.318328298 mirna_pc |
| 23769 hsa-mir-484   | NME3       | 0.31461824 mirna_pc  |
| 23770 hsa-mir-484   | CETN3      | 0.356907011 mirna_pc |
| 23771 hsa-mir-484   | ZNF513     | 0.302389148 mirna_pc |
| 23772 hsa-mir-484   | CDK3       | 0.325706266 mirna_pc |
| 23773 hsa-mir-484   | CDKN2AIPNL | 0.337878088 mirna_pc |
| 23774 hsa-mir-484   | B9D1       | 0.413005035 mirna_pc |
| 23775 hsa-mir-484   | LSM 1.00   | 0.396694702 mirna_pc |
| 23776 hsa-mir-484   | DYNC1I1    | 0.389773098 mirna_pc |
| 23777 hsa-mir-484   | ACP1       | 0.324613224 mirna_pc |
| 23778 hsa-mir-484   | WASH3P     | 0.319540351 mirna_pc |
| 23779 hsa-mir-484   | FDX1L      | 0.335195608 mirna_pc |
| 23780 hsa-mir-484   | GATAD1     | 0.339758367 mirna_pc |
| 23781 hsa-mir-484   | ZNF322A    | 0.430028662 mirna_pc |
| 23782 hsa-mir-484   | PRR22      | 0.411750775 mirna_pc |
| 23783 hsa-mir-484   | SRP19      | 0.317841174 mirna_pc |
| 23784 hsa-mir-484   | SNRNP25    | 0.361559733 mirna_pc |
| 23785 hsa-mir-484   | LOC728640  | 0.394610594 mirna_pc |
| 23786 hsa-mir-484   | LOC401397  | 0.51465138 mirna_pc  |
| 23787 hsa-mir-484   | GPS2       | 0.350048661 mirna_pc |
| 23788 hsa-mir-484   | C21orf119  | 0.376338302 mirna_pc |
| 23789 hsa-mir-484   | C2orf28    | 0.399173385 mirna_pc |
| 23790 hsa-mir-484   | MRPL40     | 0.304430073 mirna_pc |
| 23791 hsa-mir-484   | RHOT2      | 0.395685864 mirna_pc |
| 23792 hsa-mir-484   | HIRIP3     | 0.369693934 mirna_pc |
| 23793 hsa-mir-484   | AARSD1     | 0.312603916 mirna_pc |
| 23794 hsa-mir-484   | TMEM168    | 0.431258106 mirna_pc |
| 23795 hsa-mir-484   | MRPL53     | 0.471286578 mirna_pc |
| 23796 hsa-mir-484   | COPS3      | 0.349036981 mirna_pc |
| 23797 hsa-mir-484   | NDUFS8     | 0.437265127 mirna_pc |
| 23798 hsa-mir-484   | NUDC       | 0.30605749 mirna_pc  |
| 23799 hsa-mir-484   | C12orf73   | 0.300965162 mirna_pc |
| 23800 hsa-mir-484   | NMRAL1     | 0.396898068 mirna_pc |
| 23801 hsa-mir-1274b | RCC2       | 0.301832479 mirna_pc |
| 23802 hsa-mir-1274b | CDCA3      | 0.325234337 mirna_pc |
| 23803 hsa-mir-1274b | EZH2       | 0.307228245 mirna_pc |
| 23804 hsa-mir-1274b | TUBA1B     | 0.30847178 mirna_pc  |
| 23805 hsa-mir-1274b | EFTUD2     | 0.307615914 mirna_pc |
| 23806 hsa-mir-1274b | SNRPA      | 0.327521343 mirna_pc |
| 23807 hsa-mir-1274b | DEPDC1B    | 0.300934308 mirna_pc |
| 23808 hsa-mir-1274b | C19orf48   | 0.359088823 mirna_pc |
| 23809 hsa-mir-1274b | BCL2L12    | 0.310586102 mirna_pc |
| 23810 hsa-mir-1274b | PSRC1      | 0.301828354 mirna_pc |
| 23811 hsa-mir-1274b | UCA1       | 0.323181219 mirna_pc |
| 23812 hsa-mir-1274b | TRIM28     | 0.317426898 mirna_pc |
| 23813 hsa-mir-1274b | PAX9       | 0.308391576 mirna_pc |

|       |               |           |             |          |
|-------|---------------|-----------|-------------|----------|
| 23814 | hsa-mir-1274b | DNAJC5    | 0.337623994 | mirna_pc |
| 23815 | hsa-mir-1274b | ASS1      | 0.31127575  | mirna_pc |
| 23816 | hsa-mir-1274b | RBM10     | 0.30799093  | mirna_pc |
| 23817 | hsa-mir-1274b | ACPP      | 0.302727987 | mirna_pc |
| 23818 | hsa-mir-1274b | PPP2R1A   | 0.33937173  | mirna_pc |
| 23819 | hsa-mir-1274b | DACT2     | 0.301182501 | mirna_pc |
| 23820 | hsa-mir-1274b | PREB      | 0.351500387 | mirna_pc |
| 23821 | hsa-mir-1274b | LRRC20    | 0.315332278 | mirna_pc |
| 23822 | hsa-mir-1274b | UBE2MP1   | 0.302059374 | mirna_pc |
| 23823 | hsa-mir-1306  | TPX2      | 0.350585263 | mirna_pc |
| 23824 | hsa-mir-1306  | KIF4B     | 0.32686545  | mirna_pc |
| 23825 | hsa-mir-1306  | KPNA2     | 0.412257195 | mirna_pc |
| 23826 | hsa-mir-1306  | RCC2      | 0.401701152 | mirna_pc |
| 23827 | hsa-mir-1306  | HOXC9     | 0.479861175 | mirna_pc |
| 23828 | hsa-mir-1306  | KIF11     | 0.338048245 | mirna_pc |
| 23829 | hsa-mir-1306  | ECT2      | 0.31950985  | mirna_pc |
| 23830 | hsa-mir-1306  | RRM2      | 0.422577015 | mirna_pc |
| 23831 | hsa-mir-1306  | CDK1      | 0.335166195 | mirna_pc |
| 23832 | hsa-mir-1306  | CDC25C    | 0.345920492 | mirna_pc |
| 23833 | hsa-mir-1306  | PLK1      | 0.360712239 | mirna_pc |
| 23834 | hsa-mir-1306  | UBE2C     | 0.365641094 | mirna_pc |
| 23835 | hsa-mir-1306  | BUB1      | 0.323074029 | mirna_pc |
| 23836 | hsa-mir-1306  | PRC1      | 0.403806853 | mirna_pc |
| 23837 | hsa-mir-1306  | NUSAP1    | 0.474288882 | mirna_pc |
| 23838 | hsa-mir-1306  | KIFC1     | 0.407006024 | mirna_pc |
| 23839 | hsa-mir-1306  | BUB1B     | 0.503141171 | mirna_pc |
| 23840 | hsa-mir-1306  | KIF18B    | 0.398411863 | mirna_pc |
| 23841 | hsa-mir-1306  | CKAP2     | 0.348616358 | mirna_pc |
| 23842 | hsa-mir-1306  | KIF2C     | 0.430254666 | mirna_pc |
| 23843 | hsa-mir-1306  | FANCA     | 0.300210086 | mirna_pc |
| 23844 | hsa-mir-1306  | NCAPG     | 0.371126276 | mirna_pc |
| 23845 | hsa-mir-1306  | CDC20     | 0.466647786 | mirna_pc |
| 23846 | hsa-mir-1306  | CLSPN     | 0.33897371  | mirna_pc |
| 23847 | hsa-mir-1306  | ARHGAP11A | 0.349949704 | mirna_pc |
| 23848 | hsa-mir-1306  | CCNA2     | 0.433859133 | mirna_pc |
| 23849 | hsa-mir-1306  | SPC25     | 0.305035796 | mirna_pc |
| 23850 | hsa-mir-1306  | FANCI     | 0.438060982 | mirna_pc |
| 23851 | hsa-mir-1306  | NEK2      | 0.380420133 | mirna_pc |
| 23852 | hsa-mir-1306  | MND1      | 0.381325969 | mirna_pc |
| 23853 | hsa-mir-1306  | HOXC11    | 0.303369245 | mirna_pc |
| 23854 | hsa-mir-1306  | KIF22     | 0.360850442 | mirna_pc |
| 23855 | hsa-mir-1306  | NCAPH     | 0.419239525 | mirna_pc |
| 23856 | hsa-mir-1306  | GTSE1     | 0.365621133 | mirna_pc |
| 23857 | hsa-mir-1306  | KIF23     | 0.379576874 | mirna_pc |
| 23858 | hsa-mir-1306  | RAD54L    | 0.436057582 | mirna_pc |
| 23859 | hsa-mir-1306  | CENPA     | 0.490328239 | mirna_pc |
| 23860 | hsa-mir-1306  | MAD2L1    | 0.470109321 | mirna_pc |
| 23861 | hsa-mir-1306  | TIMELESS  | 0.383911762 | mirna_pc |
| 23862 | hsa-mir-1306  | LMNB1     | 0.331517457 | mirna_pc |
| 23863 | hsa-mir-1306  | CDCA8     | 0.478199163 | mirna_pc |
| 23864 | hsa-mir-1306  | TROAP     | 0.45290036  | mirna_pc |
| 23865 | hsa-mir-1306  | CCNB1     | 0.318887779 | mirna_pc |
| 23866 | hsa-mir-1306  | CDCA5     | 0.317917183 | mirna_pc |
| 23867 | hsa-mir-1306  | TACC3     | 0.334475076 | mirna_pc |

|                    |          |                      |
|--------------------|----------|----------------------|
| 23868 hsa-mir-1306 | CDC45    | 0.398668681 mirna_pc |
| 23869 hsa-mir-1306 | STMN1    | 0.380271561 mirna_pc |
| 23870 hsa-mir-1306 | CENPM    | 0.364505292 mirna_pc |
| 23871 hsa-mir-1306 | TK1      | 0.315536371 mirna_pc |
| 23872 hsa-mir-1306 | UBE2T    | 0.378356967 mirna_pc |
| 23873 hsa-mir-1306 | CKS1B    | 0.375001301 mirna_pc |
| 23874 hsa-mir-1306 | TUBB     | 0.348671455 mirna_pc |
| 23875 hsa-mir-1306 | KIF4A    | 0.383877232 mirna_pc |
| 23876 hsa-mir-1306 | ORC1L    | 0.335909136 mirna_pc |
| 23877 hsa-mir-1306 | UHRF1    | 0.313089376 mirna_pc |
| 23878 hsa-mir-1306 | CCNF     | 0.31494384 mirna_pc  |
| 23879 hsa-mir-1306 | RACGAP1  | 0.376018199 mirna_pc |
| 23880 hsa-mir-1306 | PTBP1    | 0.334072251 mirna_pc |
| 23881 hsa-mir-1306 | CCNB2    | 0.467182994 mirna_pc |
| 23882 hsa-mir-1306 | PLK4     | 0.386701461 mirna_pc |
| 23883 hsa-mir-1306 | DEPDC1   | 0.38732352 mirna_pc  |
| 23884 hsa-mir-1306 | HJURP    | 0.392113391 mirna_pc |
| 23885 hsa-mir-1306 | SKA1     | 0.333642573 mirna_pc |
| 23886 hsa-mir-1306 | RAD51    | 0.369533241 mirna_pc |
| 23887 hsa-mir-1306 | BLM      | 0.404870363 mirna_pc |
| 23888 hsa-mir-1306 | NME1     | 0.343179539 mirna_pc |
| 23889 hsa-mir-1306 | PAICS    | 0.354773997 mirna_pc |
| 23890 hsa-mir-1306 | BIRC5    | 0.546259373 mirna_pc |
| 23891 hsa-mir-1306 | RCC1     | 0.411387381 mirna_pc |
| 23892 hsa-mir-1306 | OIP5     | 0.507727611 mirna_pc |
| 23893 hsa-mir-1306 | EME1     | 0.334806619 mirna_pc |
| 23894 hsa-mir-1306 | RECQL4   | 0.344916333 mirna_pc |
| 23895 hsa-mir-1306 | AURKB    | 0.400628922 mirna_pc |
| 23896 hsa-mir-1306 | GSG2     | 0.304374776 mirna_pc |
| 23897 hsa-mir-1306 | CDT1     | 0.305073956 mirna_pc |
| 23898 hsa-mir-1306 | MCM10    | 0.304554484 mirna_pc |
| 23899 hsa-mir-1306 | KIF20A   | 0.334840913 mirna_pc |
| 23900 hsa-mir-1306 | SGOL2    | 0.312943273 mirna_pc |
| 23901 hsa-mir-1306 | CHEK2    | 0.46407858 mirna_pc  |
| 23902 hsa-mir-1306 | KIF15    | 0.348658903 mirna_pc |
| 23903 hsa-mir-1306 | CDCA3    | 0.359585363 mirna_pc |
| 23904 hsa-mir-1306 | FEN1     | 0.348206875 mirna_pc |
| 23905 hsa-mir-1306 | TRAIP    | 0.392842454 mirna_pc |
| 23906 hsa-mir-1306 | ORC6L    | 0.333073623 mirna_pc |
| 23907 hsa-mir-1306 | CASC5    | 0.334656031 mirna_pc |
| 23908 hsa-mir-1306 | C16orf59 | 0.372817145 mirna_pc |
| 23909 hsa-mir-1306 | FAM72D   | 0.322499209 mirna_pc |
| 23910 hsa-mir-1306 | FAM72B   | 0.31318798 mirna_pc  |
| 23911 hsa-mir-1306 | NEIL3    | 0.335622721 mirna_pc |
| 23912 hsa-mir-1306 | ACTL6A   | 0.305867592 mirna_pc |
| 23913 hsa-mir-1306 | C12orf48 | 0.425097679 mirna_pc |
| 23914 hsa-mir-1306 | HNRNPL   | 0.41528858 mirna_pc  |
| 23915 hsa-mir-1306 | ZWILCH   | 0.36399494 mirna_pc  |
| 23916 hsa-mir-1306 | TTK      | 0.306877244 mirna_pc |
| 23917 hsa-mir-1306 | ZWINT    | 0.45529 mirna_pc     |
| 23918 hsa-mir-1306 | TUBA1B   | 0.444360679 mirna_pc |
| 23919 hsa-mir-1306 | UBE2S    | 0.445530413 mirna_pc |
| 23920 hsa-mir-1306 | PSMA4    | 0.338303724 mirna_pc |
| 23921 hsa-mir-1306 | C11orf82 | 0.388735912 mirna_pc |

|       |              |           |             |          |
|-------|--------------|-----------|-------------|----------|
| 23922 | hsa-mir-1306 | HNRNPC    | 0.381702178 | mirna_pc |
| 23923 | hsa-mir-1306 | ILF2      | 0.352591082 | mirna_pc |
| 23924 | hsa-mir-1306 | TCF3      | 0.349264911 | mirna_pc |
| 23925 | hsa-mir-1306 | CHEK1     | 0.337605258 | mirna_pc |
| 23926 | hsa-mir-1306 | MCM5      | 0.316984646 | mirna_pc |
| 23927 | hsa-mir-1306 | RAN       | 0.342106951 | mirna_pc |
| 23928 | hsa-mir-1306 | TYMS      | 0.345152964 | mirna_pc |
| 23929 | hsa-mir-1306 | RNASEH2A  | 0.326067425 | mirna_pc |
| 23930 | hsa-mir-1306 | EPR1      | 0.45931217  | mirna_pc |
| 23931 | hsa-mir-1306 | PIF1      | 0.388068659 | mirna_pc |
| 23932 | hsa-mir-1306 | H2AFX     | 0.365297183 | mirna_pc |
| 23933 | hsa-mir-1306 | SFRS2     | 0.348886312 | mirna_pc |
| 23934 | hsa-mir-1306 | UCK2      | 0.409334305 | mirna_pc |
| 23935 | hsa-mir-1306 | EFTUD2    | 0.321011013 | mirna_pc |
| 23936 | hsa-mir-1306 | NFKBIL2   | 0.391587592 | mirna_pc |
| 23937 | hsa-mir-1306 | C15orf42  | 0.404769484 | mirna_pc |
| 23938 | hsa-mir-1306 | PRIM2     | 0.331770453 | mirna_pc |
| 23939 | hsa-mir-1306 | HMGB3     | 0.301017617 | mirna_pc |
| 23940 | hsa-mir-1306 | FAM64A    | 0.31379413  | mirna_pc |
| 23941 | hsa-mir-1306 | RANBP1    | 0.524454518 | mirna_pc |
| 23942 | hsa-mir-1306 | E2F1      | 0.359525575 | mirna_pc |
| 23943 | hsa-mir-1306 | SNRPG     | 0.358287287 | mirna_pc |
| 23944 | hsa-mir-1306 | EIF4A3    | 0.33269878  | mirna_pc |
| 23945 | hsa-mir-1306 | MCM3      | 0.306934454 | mirna_pc |
| 23946 | hsa-mir-1306 | SNRPA     | 0.429067266 | mirna_pc |
| 23947 | hsa-mir-1306 | DNAJC9    | 0.307494732 | mirna_pc |
| 23948 | hsa-mir-1306 | U2AF2     | 0.339204971 | mirna_pc |
| 23949 | hsa-mir-1306 | POC1A     | 0.346669336 | mirna_pc |
| 23950 | hsa-mir-1306 | CENPO     | 0.49745963  | mirna_pc |
| 23951 | hsa-mir-1306 | NUDT1     | 0.33860678  | mirna_pc |
| 23952 | hsa-mir-1306 | GINS2     | 0.308222322 | mirna_pc |
| 23953 | hsa-mir-1306 | DNA2      | 0.317689383 | mirna_pc |
| 23954 | hsa-mir-1306 | SNRPD1    | 0.332047036 | mirna_pc |
| 23955 | hsa-mir-1306 | DTYMK     | 0.329694345 | mirna_pc |
| 23956 | hsa-mir-1306 | HSPE1     | 0.301571971 | mirna_pc |
| 23957 | hsa-mir-1306 | C16orf75  | 0.305548933 | mirna_pc |
| 23958 | hsa-mir-1306 | EBNA1BP2  | 0.314538793 | mirna_pc |
| 23959 | hsa-mir-1306 | HIST1H2AE | 0.33646744  | mirna_pc |
| 23960 | hsa-mir-1306 | CAD       | 0.370526377 | mirna_pc |
| 23961 | hsa-mir-1306 | CCDC99    | 0.322441831 | mirna_pc |
| 23962 | hsa-mir-1306 | CDK2      | 0.401181025 | mirna_pc |
| 23963 | hsa-mir-1306 | CDK4      | 0.380163536 | mirna_pc |
| 23964 | hsa-mir-1306 | INCENP    | 0.32532637  | mirna_pc |
| 23965 | hsa-mir-1306 | CKAP5     | 0.347243738 | mirna_pc |
| 23966 | hsa-mir-1306 | BCL2L12   | 0.308387041 | mirna_pc |
| 23967 | hsa-mir-1306 | HNRNPR    | 0.373737842 | mirna_pc |
| 23968 | hsa-mir-1306 | KAT2A     | 0.342758092 | mirna_pc |
| 23969 | hsa-mir-1306 | CHAF1B    | 0.32862643  | mirna_pc |
| 23970 | hsa-mir-1306 | HOXC10    | 0.374724864 | mirna_pc |
| 23971 | hsa-mir-1306 | MSH2      | 0.397566801 | mirna_pc |
| 23972 | hsa-mir-1306 | TOMM40    | 0.359699284 | mirna_pc |
| 23973 | hsa-mir-1306 | SF3B3     | 0.346012403 | mirna_pc |
| 23974 | hsa-mir-1306 | CDC7      | 0.406410629 | mirna_pc |
| 23975 | hsa-mir-1306 | YDJC      | 0.458341007 | mirna_pc |



|                    |              |                      |
|--------------------|--------------|----------------------|
| 23976 hsa-mir-1306 | PUS1         | 0.33663817 mirna_pc  |
| 23977 hsa-mir-1306 | SNRPC        | 0.364837503 mirna_pc |
| 23978 hsa-mir-1306 | PSMB4        | 0.328423056 mirna_pc |
| 23979 hsa-mir-1306 | RFC4         | 0.381033784 mirna_pc |
| 23980 hsa-mir-1306 | DCLRE1B      | 0.342449536 mirna_pc |
| 23981 hsa-mir-1306 | CDC25A       | 0.393068688 mirna_pc |
| 23982 hsa-mir-1306 | TMEM48       | 0.342671786 mirna_pc |
| 23983 hsa-mir-1306 | RAD54B       | 0.35954717 mirna_pc  |
| 23984 hsa-mir-1306 | H2AFZ        | 0.389055997 mirna_pc |
| 23985 hsa-mir-1306 | MAGOH        | 0.398483917 mirna_pc |
| 23986 hsa-mir-1306 | NUP37        | 0.361479897 mirna_pc |
| 23987 hsa-mir-1306 | CLN6         | 0.325578261 mirna_pc |
| 23988 hsa-mir-1306 | CPSF3        | 0.426650912 mirna_pc |
| 23989 hsa-mir-1306 | BANF1        | 0.34304612 mirna_pc  |
| 23990 hsa-mir-1306 | SNRPE        | 0.326204303 mirna_pc |
| 23991 hsa-mir-1306 | C21orf45     | 0.447929336 mirna_pc |
| 23992 hsa-mir-1306 | ATIC         | 0.315167025 mirna_pc |
| 23993 hsa-mir-1306 | PPM1G        | 0.443851159 mirna_pc |
| 23994 hsa-mir-1306 | MARCKSL1     | 0.327665411 mirna_pc |
| 23995 hsa-mir-1306 | NPM3         | 0.365698476 mirna_pc |
| 23996 hsa-mir-1306 | NUDT5        | 0.358760345 mirna_pc |
| 23997 hsa-mir-1306 | NUTF2        | 0.301585119 mirna_pc |
| 23998 hsa-mir-1306 | DAZAP1       | 0.357672375 mirna_pc |
| 23999 hsa-mir-1306 | CBX8         | 0.385795385 mirna_pc |
| 24000 hsa-mir-1306 | TMEM201      | 0.438862407 mirna_pc |
| 24001 hsa-mir-1306 | TFDP1        | 0.335442749 mirna_pc |
| 24002 hsa-mir-1306 | PAFAH1B3     | 0.35699483 mirna_pc  |
| 24003 hsa-mir-1306 | PSRC1        | 0.437779508 mirna_pc |
| 24004 hsa-mir-1306 | DGUOK        | 0.315118397 mirna_pc |
| 24005 hsa-mir-1306 | DBF4B        | 0.313133294 mirna_pc |
| 24006 hsa-mir-1306 | FBL          | 0.324764901 mirna_pc |
| 24007 hsa-mir-1306 | DONSON       | 0.347959299 mirna_pc |
| 24008 hsa-mir-1306 | EXOSC5       | 0.330512791 mirna_pc |
| 24009 hsa-mir-1306 | TMPO         | 0.333187739 mirna_pc |
| 24010 hsa-mir-1306 | POLR2H       | 0.320937967 mirna_pc |
| 24011 hsa-mir-1306 | MRT04        | 0.361593478 mirna_pc |
| 24012 hsa-mir-1306 | PPIH         | 0.405227699 mirna_pc |
| 24013 hsa-mir-1306 | DHX9         | 0.301309739 mirna_pc |
| 24014 hsa-mir-1306 | LOC100128191 | 0.427436958 mirna_pc |
| 24015 hsa-mir-1306 | GNB1L        | 0.366465276 mirna_pc |
| 24016 hsa-mir-1306 | SMYD5        | 0.352920653 mirna_pc |
| 24017 hsa-mir-1306 | TSSC1        | 0.336551874 mirna_pc |
| 24018 hsa-mir-1306 | SNRPF        | 0.333196214 mirna_pc |
| 24019 hsa-mir-1306 | SUMO2        | 0.367945148 mirna_pc |
| 24020 hsa-mir-1306 | WDR43        | 0.303717819 mirna_pc |
| 24021 hsa-mir-1306 | SNRPA1       | 0.405353875 mirna_pc |
| 24022 hsa-mir-1306 | SKP2         | 0.404900505 mirna_pc |
| 24023 hsa-mir-1306 | TIPIN        | 0.475929399 mirna_pc |
| 24024 hsa-mir-1306 | HSPBP1       | 0.356984738 mirna_pc |
| 24025 hsa-mir-1306 | ECE2         | 0.369332057 mirna_pc |
| 24026 hsa-mir-1306 | GPN1         | 0.342552908 mirna_pc |
| 24027 hsa-mir-1306 | RFC5         | 0.335958922 mirna_pc |
| 24028 hsa-mir-1306 | MAZ          | 0.415281708 mirna_pc |
| 24029 hsa-mir-1306 | SSRP1        | 0.311690888 mirna_pc |

|       |              |           |             |          |
|-------|--------------|-----------|-------------|----------|
| 24030 | hsa-mir-1306 | POLR2D    | 0.315065852 | mirna_pc |
| 24031 | hsa-mir-1306 | PA2G4     | 0.394516582 | mirna_pc |
| 24032 | hsa-mir-1306 | SNRPD3    | 0.5507795   | mirna_pc |
| 24033 | hsa-mir-1306 | KHDRBS1   | 0.426409471 | mirna_pc |
| 24034 | hsa-mir-1306 | SLC5A6    | 0.321897564 | mirna_pc |
| 24035 | hsa-mir-1306 | LOC92659  | 0.301217492 | mirna_pc |
| 24036 | hsa-mir-1306 | RTN4R     | 0.304023805 | mirna_pc |
| 24037 | hsa-mir-1306 | CCT7      | 0.303968201 | mirna_pc |
| 24038 | hsa-mir-1306 | TMEM194A  | 0.311973748 | mirna_pc |
| 24039 | hsa-mir-1306 | SNRNP40   | 0.402598024 | mirna_pc |
| 24040 | hsa-mir-1306 | TMEM69    | 0.30170997  | mirna_pc |
| 24041 | hsa-mir-1306 | GNL2      | 0.366819922 | mirna_pc |
| 24042 | hsa-mir-1306 | NASP      | 0.304695931 | mirna_pc |
| 24043 | hsa-mir-1306 | RPP40     | 0.310297837 | mirna_pc |
| 24044 | hsa-mir-1306 | NONO      | 0.329084271 | mirna_pc |
| 24045 | hsa-mir-1306 | CCDC86    | 0.363455567 | mirna_pc |
| 24046 | hsa-mir-1306 | OBFC2B    | 0.343725975 | mirna_pc |
| 24047 | hsa-mir-1306 | PTMA      | 0.344064309 | mirna_pc |
| 24048 | hsa-mir-1306 | USP39     | 0.338065429 | mirna_pc |
| 24049 | hsa-mir-1306 | WDR76     | 0.378536896 | mirna_pc |
| 24050 | hsa-mir-1306 | LSM 4.00  | 0.336146573 | mirna_pc |
| 24051 | hsa-mir-1306 | C11orf84  | 0.303285249 | mirna_pc |
| 24052 | hsa-mir-1306 | TBCE      | 0.308757054 | mirna_pc |
| 24053 | hsa-mir-1306 | HIST1H2BK | 0.323820558 | mirna_pc |
| 24054 | hsa-mir-1306 | FBX0220S  | 0.347838514 | mirna_pc |
| 24055 | hsa-mir-1306 | SUV39H2   | 0.300755128 | mirna_pc |
| 24056 | hsa-mir-1306 | LSM 2.00  | 0.327996282 | mirna_pc |
| 24057 | hsa-mir-1306 | ALG6      | 0.340556648 | mirna_pc |
| 24058 | hsa-mir-1306 | HNRNPD    | 0.343392673 | mirna_pc |
| 24059 | hsa-mir-1306 | DPY30     | 0.317702873 | mirna_pc |
| 24060 | hsa-mir-1306 | MTHFD2    | 0.332903286 | mirna_pc |
| 24061 | hsa-mir-1306 | DPH2      | 0.407251235 | mirna_pc |
| 24062 | hsa-mir-1306 | MEN1      | 0.341280523 | mirna_pc |
| 24063 | hsa-mir-1306 | PNO1      | 0.33026299  | mirna_pc |
| 24064 | hsa-mir-1306 | CCT4      | 0.311787259 | mirna_pc |
| 24065 | hsa-mir-1306 | ELAVL1    | 0.379137096 | mirna_pc |
| 24066 | hsa-mir-1306 | MIF       | 0.313509414 | mirna_pc |
| 24067 | hsa-mir-1306 | NCAPD3    | 0.3975045   | mirna_pc |
| 24068 | hsa-mir-1306 | NAE1      | 0.326089385 | mirna_pc |
| 24069 | hsa-mir-1306 | PSMC3IP   | 0.30288494  | mirna_pc |
| 24070 | hsa-mir-1306 | TBC1D7    | 0.430278601 | mirna_pc |
| 24071 | hsa-mir-1306 | PAK1IP1   | 0.460094525 | mirna_pc |
| 24072 | hsa-mir-1306 | PES 1.00  | 0.322342374 | mirna_pc |
| 24073 | hsa-mir-1306 | E2F4      | 0.336714685 | mirna_pc |
| 24074 | hsa-mir-1306 | C18orf45  | 0.313043479 | mirna_pc |
| 24075 | hsa-mir-1306 | PGAM5     | 0.347512639 | mirna_pc |
| 24076 | hsa-mir-1306 | NAA25     | 0.302149634 | mirna_pc |
| 24077 | hsa-mir-1306 | KDM1A     | 0.367733873 | mirna_pc |
| 24078 | hsa-mir-1306 | ILF3      | 0.323170495 | mirna_pc |
| 24079 | hsa-mir-1306 | EHMT2     | 0.410867451 | mirna_pc |
| 24080 | hsa-mir-1306 | SFRS9     | 0.363253314 | mirna_pc |
| 24081 | hsa-mir-1306 | COMMD4    | 0.328433177 | mirna_pc |
| 24082 | hsa-mir-1306 | C14orf80  | 0.344755082 | mirna_pc |
| 24083 | hsa-mir-1306 | GTF2H4    | 0.304172054 | mirna_pc |

|       |              |           |             |          |
|-------|--------------|-----------|-------------|----------|
| 24084 | hsa-mir-1306 | KHSRP     | 0.399769388 | mirna_pc |
| 24085 | hsa-mir-1306 | HEATR2    | 0.316108098 | mirna_pc |
| 24086 | hsa-mir-1306 | LSM 6.00  | 0.31036539  | mirna_pc |
| 24087 | hsa-mir-1306 | PRAME     | 0.478005403 | mirna_pc |
| 24088 | hsa-mir-1306 | SUV39H1   | 0.379519941 | mirna_pc |
| 24089 | hsa-mir-1306 | IPO9      | 0.31704705  | mirna_pc |
| 24090 | hsa-mir-1306 | PSMD4     | 0.312885606 | mirna_pc |
| 24091 | hsa-mir-1306 | SART3     | 0.329155865 | mirna_pc |
| 24092 | hsa-mir-1306 | GAR1      | 0.319353547 | mirna_pc |
| 24093 | hsa-mir-1306 | C15orf23  | 0.486535324 | mirna_pc |
| 24094 | hsa-mir-1306 | NOC4L     | 0.302373378 | mirna_pc |
| 24095 | hsa-mir-1306 | DIABLO    | 0.306487974 | mirna_pc |
| 24096 | hsa-mir-1306 | ITGB3BP   | 0.337013852 | mirna_pc |
| 24097 | hsa-mir-1306 | ENOPH1    | 0.30962068  | mirna_pc |
| 24098 | hsa-mir-1306 | SPG21     | 0.300153426 | mirna_pc |
| 24099 | hsa-mir-1306 | XRCC3     | 0.31951802  | mirna_pc |
| 24100 | hsa-mir-1306 | TUBG1     | 0.334316772 | mirna_pc |
| 24101 | hsa-mir-1306 | C17orf96  | 0.321480238 | mirna_pc |
| 24102 | hsa-mir-1306 | PLEKHG4   | 0.333396839 | mirna_pc |
| 24103 | hsa-mir-1306 | SFPQ      | 0.37625051  | mirna_pc |
| 24104 | hsa-mir-1306 | VPS72     | 0.378158721 | mirna_pc |
| 24105 | hsa-mir-1306 | RCOR2     | 0.401846812 | mirna_pc |
| 24106 | hsa-mir-1306 | EIF4EBP1  | 0.317932426 | mirna_pc |
| 24107 | hsa-mir-1306 | RHBDD3    | 0.356385776 | mirna_pc |
| 24108 | hsa-mir-1306 | ATAD3A    | 0.360737159 | mirna_pc |
| 24109 | hsa-mir-1306 | GMNN      | 0.314489144 | mirna_pc |
| 24110 | hsa-mir-1306 | PA2G4P4   | 0.421965568 | mirna_pc |
| 24111 | hsa-mir-1306 | PDAP1     | 0.305051287 | mirna_pc |
| 24112 | hsa-mir-1306 | BRI3BP    | 0.322830241 | mirna_pc |
| 24113 | hsa-mir-1306 | GEMIN6    | 0.3632898   | mirna_pc |
| 24114 | hsa-mir-1306 | DUT       | 0.308045201 | mirna_pc |
| 24115 | hsa-mir-1306 | PDCD5     | 0.362561299 | mirna_pc |
| 24116 | hsa-mir-1306 | PTCD1     | 0.340693103 | mirna_pc |
| 24117 | hsa-mir-1306 | MSH6      | 0.368017669 | mirna_pc |
| 24118 | hsa-mir-1306 | C3orf34   | 0.303462397 | mirna_pc |
| 24119 | hsa-mir-1306 | SRM       | 0.302399072 | mirna_pc |
| 24120 | hsa-mir-1306 | XRCC6     | 0.316679179 | mirna_pc |
| 24121 | hsa-mir-1306 | PSMG1     | 0.339472122 | mirna_pc |
| 24122 | hsa-mir-1306 | PPP1R8    | 0.359941123 | mirna_pc |
| 24123 | hsa-mir-1306 | NPM1      | 0.311779325 | mirna_pc |
| 24124 | hsa-mir-1306 | CDK2AP1   | 0.313811439 | mirna_pc |
| 24125 | hsa-mir-1306 | NUDT3     | 0.470245652 | mirna_pc |
| 24126 | hsa-mir-1306 | MEX3A     | 0.340656411 | mirna_pc |
| 24127 | hsa-mir-1306 | ATP5J2    | 0.304147606 | mirna_pc |
| 24128 | hsa-mir-1306 | ERAL1     | 0.34768648  | mirna_pc |
| 24129 | hsa-mir-1306 | TAF5      | 0.398293638 | mirna_pc |
| 24130 | hsa-mir-1306 | APEX1     | 0.339018417 | mirna_pc |
| 24131 | hsa-mir-1306 | MAD2L2    | 0.309305222 | mirna_pc |
| 24132 | hsa-mir-1306 | HNRNPA1L2 | 0.311994005 | mirna_pc |
| 24133 | hsa-mir-1306 | RCCD1     | 0.331904714 | mirna_pc |
| 24134 | hsa-mir-1306 | C15orf44  | 0.352274506 | mirna_pc |
| 24135 | hsa-mir-1306 | FARSB     | 0.328123228 | mirna_pc |
| 24136 | hsa-mir-1306 | ERI3      | 0.365253237 | mirna_pc |
| 24137 | hsa-mir-1306 | RCN2      | 0.340722081 | mirna_pc |

|                    |           |                      |
|--------------------|-----------|----------------------|
| 24138 hsa-mir-1306 | CIB2      | 0.307713894 mirna_pc |
| 24139 hsa-mir-1306 | TARBP2    | 0.328269276 mirna_pc |
| 24140 hsa-mir-1306 | TOMM22    | 0.327582682 mirna_pc |
| 24141 hsa-mir-1306 | PHB       | 0.324007352 mirna_pc |
| 24142 hsa-mir-1306 | C12orf52  | 0.311259582 mirna_pc |
| 24143 hsa-mir-1306 | NOL10     | 0.402915118 mirna_pc |
| 24144 hsa-mir-1306 | SF3A3     | 0.34676152 mirna_pc  |
| 24145 hsa-mir-1306 | POLE      | 0.393910303 mirna_pc |
| 24146 hsa-mir-1306 | C8orf30A  | 0.348519936 mirna_pc |
| 24147 hsa-mir-1306 | MUTYH     | 0.431308399 mirna_pc |
| 24148 hsa-mir-1306 | WRNIP1    | 0.354609935 mirna_pc |
| 24149 hsa-mir-1306 | TAF1B     | 0.358271696 mirna_pc |
| 24150 hsa-mir-1306 | TIMM50    | 0.367724285 mirna_pc |
| 24151 hsa-mir-1306 | ADSL      | 0.398436653 mirna_pc |
| 24152 hsa-mir-1306 | VRK1      | 0.323221279 mirna_pc |
| 24153 hsa-mir-1306 | EXOSC9    | 0.344767544 mirna_pc |
| 24154 hsa-mir-1306 | UNG       | 0.365409481 mirna_pc |
| 24155 hsa-mir-1306 | GRK6      | 0.345967404 mirna_pc |
| 24156 hsa-mir-1306 | CDK16     | 0.370121746 mirna_pc |
| 24157 hsa-mir-1306 | ALKBH2    | 0.408697396 mirna_pc |
| 24158 hsa-mir-1306 | POP5      | 0.336612122 mirna_pc |
| 24159 hsa-mir-1306 | CCDC90A   | 0.324787073 mirna_pc |
| 24160 hsa-mir-1306 | SOCS7     | 0.314857503 mirna_pc |
| 24161 hsa-mir-1306 | NHLRC1    | 0.366073644 mirna_pc |
| 24162 hsa-mir-1306 | CCDC24    | 0.327596143 mirna_pc |
| 24163 hsa-mir-1306 | GPN3      | 0.355425023 mirna_pc |
| 24164 hsa-mir-1306 | LOC152217 | 0.306977154 mirna_pc |
| 24165 hsa-mir-1306 | MRPL37    | 0.340511665 mirna_pc |
| 24166 hsa-mir-1306 | MEMO1     | 0.30962483 mirna_pc  |
| 24167 hsa-mir-1306 | CCDC23    | 0.346569467 mirna_pc |
| 24168 hsa-mir-1306 | EIF3I     | 0.392124282 mirna_pc |
| 24169 hsa-mir-1306 | LINGO1    | 0.353070592 mirna_pc |
| 24170 hsa-mir-1306 | DNAJC14   | 0.353237442 mirna_pc |
| 24171 hsa-mir-1306 | KDM2B     | 0.301130805 mirna_pc |
| 24172 hsa-mir-1306 | GTF3C2    | 0.322874075 mirna_pc |
| 24173 hsa-mir-1306 | MAGEF1    | 0.367678703 mirna_pc |
| 24174 hsa-mir-1306 | C15orf63  | 0.303335141 mirna_pc |
| 24175 hsa-mir-1306 | PCGF6     | 0.330448285 mirna_pc |
| 24176 hsa-mir-1306 | YRDC      | 0.306819155 mirna_pc |
| 24177 hsa-mir-1306 | SMARCB1   | 0.443077936 mirna_pc |
| 24178 hsa-mir-1306 | CCT8      | 0.333911628 mirna_pc |
| 24179 hsa-mir-1306 | TTC32     | 0.304940307 mirna_pc |
| 24180 hsa-mir-1306 | U2AF1     | 0.341985202 mirna_pc |
| 24181 hsa-mir-1306 | B4GALT2   | 0.300322704 mirna_pc |
| 24182 hsa-mir-1306 | UFD1L     | 0.308247077 mirna_pc |
| 24183 hsa-mir-1306 | ZNF639    | 0.316657102 mirna_pc |
| 24184 hsa-mir-1306 | ITPRIPL1  | 0.316969088 mirna_pc |
| 24185 hsa-mir-1306 | ABT1      | 0.337778067 mirna_pc |
| 24186 hsa-mir-1306 | SLC25A17  | 0.315598795 mirna_pc |
| 24187 hsa-mir-1306 | RPS7      | 0.317946133 mirna_pc |
| 24188 hsa-mir-1306 | MKRN3     | 0.356209543 mirna_pc |
| 24189 hsa-mir-1306 | LOC401010 | 0.330850971 mirna_pc |
| 24190 hsa-mir-1306 | STRA13    | 0.345727659 mirna_pc |
| 24191 hsa-mir-1306 | BCL7A     | 0.3811872 mirna_pc   |

|                    |           |                      |
|--------------------|-----------|----------------------|
| 24192 hsa-mir-1306 | MTX1      | 0.303390459 mirna_pc |
| 24193 hsa-mir-1306 | NUDCD2    | 0.311065777 mirna_pc |
| 24194 hsa-mir-1306 | ARHGAP19  | 0.323304084 mirna_pc |
| 24195 hsa-mir-1306 | WDR77     | 0.35673019 mirna_pc  |
| 24196 hsa-mir-1306 | MRPL21    | 0.307390002 mirna_pc |
| 24197 hsa-mir-1306 | NLE1      | 0.341296312 mirna_pc |
| 24198 hsa-mir-1306 | PPP1CC    | 0.30594034 mirna_pc  |
| 24199 hsa-mir-1306 | TMEM106C  | 0.317189734 mirna_pc |
| 24200 hsa-mir-1306 | TAF4B     | 0.339595297 mirna_pc |
| 24201 hsa-mir-1306 | TRMT61B   | 0.313486545 mirna_pc |
| 24202 hsa-mir-1306 | MPV17     | 0.315346261 mirna_pc |
| 24203 hsa-mir-1306 | DDX20     | 0.358427183 mirna_pc |
| 24204 hsa-mir-1306 | GTF2A2    | 0.385105173 mirna_pc |
| 24205 hsa-mir-1306 | C1orf109  | 0.358567646 mirna_pc |
| 24206 hsa-mir-1306 | MTA1      | 0.340400514 mirna_pc |
| 24207 hsa-mir-1306 | HTRA2     | 0.303458877 mirna_pc |
| 24208 hsa-mir-1306 | FBX022    | 0.343440869 mirna_pc |
| 24209 hsa-mir-1306 | MTA3      | 0.388250816 mirna_pc |
| 24210 hsa-mir-1306 | GRTP1     | 0.306359506 mirna_pc |
| 24211 hsa-mir-1306 | INTU      | 0.314551477 mirna_pc |
| 24212 hsa-mir-1306 | MAPKAPK5  | 0.356889226 mirna_pc |
| 24213 hsa-mir-1306 | DRG1      | 0.432721267 mirna_pc |
| 24214 hsa-mir-1306 | NOL7      | 0.411726278 mirna_pc |
| 24215 hsa-mir-1306 | CPSF4     | 0.326228261 mirna_pc |
| 24216 hsa-mir-1306 | NT5C      | 0.312731705 mirna_pc |
| 24217 hsa-mir-1306 | ALG10     | 0.306677597 mirna_pc |
| 24218 hsa-mir-1306 | NF2       | 0.322777087 mirna_pc |
| 24219 hsa-mir-1306 | TTC27     | 0.378658334 mirna_pc |
| 24220 hsa-mir-1306 | DHRS13    | 0.369069696 mirna_pc |
| 24221 hsa-mir-1306 | RPF1      | 0.364333844 mirna_pc |
| 24222 hsa-mir-1306 | EWSR1     | 0.349588425 mirna_pc |
| 24223 hsa-mir-1306 | LOC222699 | 0.326113862 mirna_pc |
| 24224 hsa-mir-1306 | DHX57     | 0.328192842 mirna_pc |
| 24225 hsa-mir-1306 | AAAS      | 0.437069378 mirna_pc |
| 24226 hsa-mir-1306 | CHST14    | 0.300171347 mirna_pc |
| 24227 hsa-mir-1306 | MTFMT     | 0.386044326 mirna_pc |
| 24228 hsa-mir-1306 | SUPT7L    | 0.302411743 mirna_pc |
| 24229 hsa-mir-1306 | MRPL30    | 0.30952098 mirna_pc  |
| 24230 hsa-mir-1306 | DHODH     | 0.309962465 mirna_pc |
| 24231 hsa-mir-1306 | AKR7A2    | 0.395797073 mirna_pc |
| 24232 hsa-mir-1306 | SFRS7     | 0.426872285 mirna_pc |
| 24233 hsa-mir-1306 | PEX10     | 0.311737109 mirna_pc |
| 24234 hsa-mir-1306 | TRMT2A    | 0.50267627 mirna_pc  |
| 24235 hsa-mir-1306 | PFAS      | 0.368537681 mirna_pc |
| 24236 hsa-mir-1306 | SARS2     | 0.303854168 mirna_pc |
| 24237 hsa-mir-1306 | LRRC45    | 0.303480086 mirna_pc |
| 24238 hsa-mir-1306 | SNUPN     | 0.346725165 mirna_pc |
| 24239 hsa-mir-1306 | RBM10     | 0.302120664 mirna_pc |
| 24240 hsa-mir-1306 | RPUSD2    | 0.36805155 mirna_pc  |
| 24241 hsa-mir-1306 | THYN1     | 0.341554406 mirna_pc |
| 24242 hsa-mir-1306 | HIRA      | 0.330159596 mirna_pc |
| 24243 hsa-mir-1306 | NUP153    | 0.348356528 mirna_pc |
| 24244 hsa-mir-1306 | NIPSNAP1  | 0.386549435 mirna_pc |
| 24245 hsa-mir-1306 | SPA17     | 0.338485062 mirna_pc |

|       |              |           |             |          |
|-------|--------------|-----------|-------------|----------|
| 24246 | hsa-mir-1306 | C17orf75  | 0.335028195 | mirna_pc |
| 24247 | hsa-mir-1306 | SEC11A    | 0.309806314 | mirna_pc |
| 24248 | hsa-mir-1306 | PGAP2     | 0.311537455 | mirna_pc |
| 24249 | hsa-mir-1306 | ZNF771    | 0.335309661 | mirna_pc |
| 24250 | hsa-mir-1306 | EEF1E1    | 0.374364779 | mirna_pc |
| 24251 | hsa-mir-1306 | YBX1      | 0.314329405 | mirna_pc |
| 24252 | hsa-mir-1306 | ATPBD4    | 0.348511701 | mirna_pc |
| 24253 | hsa-mir-1306 | C14orf104 | 0.334453988 | mirna_pc |
| 24254 | hsa-mir-1306 | MTP 18.00 | 0.322958748 | mirna_pc |
| 24255 | hsa-mir-1306 | POLR2C    | 0.30451354  | mirna_pc |
| 24256 | hsa-mir-1306 | C12orf10  | 0.306875739 | mirna_pc |
| 24257 | hsa-mir-1306 | C12orf45  | 0.318178175 | mirna_pc |
| 24258 | hsa-mir-1306 | C2orf44   | 0.392530324 | mirna_pc |
| 24259 | hsa-mir-1306 | SEPHS1    | 0.367495299 | mirna_pc |
| 24260 | hsa-mir-1306 | POMGNT1   | 0.321835343 | mirna_pc |
| 24261 | hsa-mir-1306 | RPS19BP1  | 0.34669394  | mirna_pc |
| 24262 | hsa-mir-1306 | AGBL5     | 0.350940033 | mirna_pc |
| 24263 | hsa-mir-1306 | BOLA3     | 0.32941493  | mirna_pc |
| 24264 | hsa-mir-1306 | C19orf23  | 0.306727823 | mirna_pc |
| 24265 | hsa-mir-1306 | GPS1      | 0.306038556 | mirna_pc |
| 24266 | hsa-mir-1306 | MYL6B     | 0.361264821 | mirna_pc |
| 24267 | hsa-mir-1306 | PDCD7     | 0.341460533 | mirna_pc |
| 24268 | hsa-mir-1306 | POLR2F    | 0.338777989 | mirna_pc |
| 24269 | hsa-mir-1306 | PIPSL     | 0.312950399 | mirna_pc |
| 24270 | hsa-mir-1306 | MRPS15    | 0.350162336 | mirna_pc |
| 24271 | hsa-mir-1306 | NARS2     | 0.321006832 | mirna_pc |
| 24272 | hsa-mir-1306 | EIF2B3    | 0.351198123 | mirna_pc |
| 24273 | hsa-mir-1306 | TMEM14C   | 0.308385175 | mirna_pc |
| 24274 | hsa-mir-1306 | TUBGCP4   | 0.366961268 | mirna_pc |
| 24275 | hsa-mir-1306 | DGCR6L    | 0.354108456 | mirna_pc |
| 24276 | hsa-mir-1306 | LYRM4     | 0.391136948 | mirna_pc |
| 24277 | hsa-mir-1306 | MMACHC    | 0.382535996 | mirna_pc |
| 24278 | hsa-mir-1306 | UTP11L    | 0.301129505 | mirna_pc |
| 24279 | hsa-mir-1306 | USP21     | 0.314492293 | mirna_pc |
| 24280 | hsa-mir-1306 | RFT1      | 0.301058742 | mirna_pc |
| 24281 | hsa-mir-1306 | ZNF74     | 0.467064743 | mirna_pc |
| 24282 | hsa-mir-1306 | ANP32A    | 0.389791517 | mirna_pc |
| 24283 | hsa-mir-1306 | SUPV3L1   | 0.342811553 | mirna_pc |
| 24284 | hsa-mir-1306 | HYLS1     | 0.317716355 | mirna_pc |
| 24285 | hsa-mir-1306 | HIC2      | 0.33142556  | mirna_pc |
| 24286 | hsa-mir-1306 | SDF2L1    | 0.336381826 | mirna_pc |
| 24287 | hsa-mir-1306 | THAP7     | 0.3865015   | mirna_pc |
| 24288 | hsa-mir-1306 | LCMT2     | 0.404601467 | mirna_pc |
| 24289 | hsa-mir-1306 | RRP1B     | 0.325584035 | mirna_pc |
| 24290 | hsa-mir-1306 | IQCC      | 0.31062855  | mirna_pc |
| 24291 | hsa-mir-1306 | PCID2     | 0.302667831 | mirna_pc |
| 24292 | hsa-mir-1306 | MORN2     | 0.302025032 | mirna_pc |
| 24293 | hsa-mir-1306 | C15orf40  | 0.339996278 | mirna_pc |
| 24294 | hsa-mir-1306 | MESDC2    | 0.315303202 | mirna_pc |
| 24295 | hsa-mir-1306 | SBK1      | 0.364108962 | mirna_pc |
| 24296 | hsa-mir-1306 | AFMID     | 0.326979237 | mirna_pc |
| 24297 | hsa-mir-1306 | SF3A1     | 0.330243688 | mirna_pc |
| 24298 | hsa-mir-1306 | USP13     | 0.314808133 | mirna_pc |
| 24299 | hsa-mir-1306 | SLC25A33  | 0.422436699 | mirna_pc |

|                    |           |                      |
|--------------------|-----------|----------------------|
| 24300 hsa-mir-1306 | MSI1      | 0.361265731 mirna_pc |
| 24301 hsa-mir-1306 | APCDD1    | 0.312314526 mirna_pc |
| 24302 hsa-mir-1306 | BCS1L     | 0.356067568 mirna_pc |
| 24303 hsa-mir-1306 | DDX51     | 0.355012164 mirna_pc |
| 24304 hsa-mir-1306 | PBX2      | 0.310281472 mirna_pc |
| 24305 hsa-mir-1306 | ZBTB39    | 0.352523152 mirna_pc |
| 24306 hsa-mir-1306 | EDC3      | 0.321400337 mirna_pc |
| 24307 hsa-mir-1306 | PACSIN3   | 0.332045416 mirna_pc |
| 24308 hsa-mir-1306 | MED17     | 0.323485559 mirna_pc |
| 24309 hsa-mir-1306 | VPS54     | 0.320883676 mirna_pc |
| 24310 hsa-mir-1306 | EIF2AK4   | 0.31096083 mirna_pc  |
| 24311 hsa-mir-1306 | RBBP4     | 0.319210842 mirna_pc |
| 24312 hsa-mir-1306 | LOC221710 | 0.322232305 mirna_pc |
| 24313 hsa-mir-1306 | API5      | 0.313491303 mirna_pc |
| 24314 hsa-mir-1306 | C2orf3    | 0.366612091 mirna_pc |
| 24315 hsa-mir-1306 | PTPMT1    | 0.303600166 mirna_pc |
| 24316 hsa-mir-1306 | DHRS2     | 0.345669251 mirna_pc |
| 24317 hsa-mir-1306 | MEAF6     | 0.326190427 mirna_pc |
| 24318 hsa-mir-1306 | RRP7B     | 0.310789276 mirna_pc |
| 24319 hsa-mir-1306 | TBX1      | 0.392014073 mirna_pc |
| 24320 hsa-mir-1306 | SRRD      | 0.35518987 mirna_pc  |
| 24321 hsa-mir-1306 | UBE2L3    | 0.416421284 mirna_pc |
| 24322 hsa-mir-1306 | MFAP1     | 0.302432367 mirna_pc |
| 24323 hsa-mir-1306 | COX7A2L   | 0.320165665 mirna_pc |
| 24324 hsa-mir-1306 | EXOSC6    | 0.330998738 mirna_pc |
| 24325 hsa-mir-1306 | AADAT     | 0.30173736 mirna_pc  |
| 24326 hsa-mir-1306 | ACP1      | 0.373900056 mirna_pc |
| 24327 hsa-mir-1306 | ZNF322A   | 0.303710312 mirna_pc |
| 24328 hsa-mir-1306 | CDAN1     | 0.389508343 mirna_pc |
| 24329 hsa-mir-1306 | SERF1A    | 0.371519248 mirna_pc |
| 24330 hsa-mir-1306 | CCDC117   | 0.332144118 mirna_pc |
| 24331 hsa-mir-1306 | PREB      | 0.371268515 mirna_pc |
| 24332 hsa-mir-1306 | PRMT6     | 0.368951099 mirna_pc |
| 24333 hsa-mir-1306 | LOC401397 | 0.309566398 mirna_pc |
| 24334 hsa-mir-1306 | DGCR14    | 0.32313463 mirna_pc  |
| 24335 hsa-mir-1306 | C2orf28   | 0.305809933 mirna_pc |
| 24336 hsa-mir-1306 | H2AFY2    | 0.312139568 mirna_pc |
| 24337 hsa-mir-1306 | MRPL40    | 0.375157751 mirna_pc |
| 24338 hsa-mir-1306 | UBL7      | 0.355963477 mirna_pc |
| 24339 hsa-mir-1306 | TMEM14B   | 0.380546866 mirna_pc |
| 24340 hsa-mir-1306 | THOC5     | 0.342457435 mirna_pc |
| 24341 hsa-mir-1306 | C21orf70  | 0.325144429 mirna_pc |
| 24342 hsa-mir-1306 | C22orf29  | 0.333757451 mirna_pc |
| 24343 hsa-mir-1306 | MRPL53    | 0.329032933 mirna_pc |
| 24344 hsa-mir-1306 | ZNF592    | 0.310589619 mirna_pc |
| 24345 hsa-mir-1306 | DNMT3A    | 0.354780761 mirna_pc |
| 24346 hsa-mir-1306 | TET1      | 0.314692271 mirna_pc |
| 24347 hsa-mir-1306 | C12orf73  | 0.315797072 mirna_pc |
| 24348 hsa-mir-1306 | PATZ1     | 0.306286787 mirna_pc |
| 24349 hsa-mir-1306 | C15orf61  | 0.332029132 mirna_pc |
| 24350 hsa-mir-1306 | SLC2A8    | 0.320411983 mirna_pc |
| 24351 hsa-mir-1306 | ZNF691    | 0.304759181 mirna_pc |
| 24352 hsa-mir-323  | IPW       | 0.370598814 mirna_pc |
| 24353 hsa-mir-323  | KIF2C     | 0.326126498 mirna_pc |

|                   |           |                      |
|-------------------|-----------|----------------------|
| 24354 hsa-mir-323 | PLK4      | 0.327944568 mirna_pc |
| 24355 hsa-mir-323 | HBB       | 0.55595234 mirna_pc  |
| 24356 hsa-mir-323 | HBA1      | 0.379938594 mirna_pc |
| 24357 hsa-mir-323 | CENPO     | 0.339415976 mirna_pc |
| 24358 hsa-mir-323 | CDKN1C    | 0.309563051 mirna_pc |
| 24359 hsa-mir-323 | ZNF167    | 0.315340148 mirna_pc |
| 24360 hsa-mir-323 | MEG3      | 0.78568005 mirna_pc  |
| 24361 hsa-mir-323 | HBA2      | 0.352285967 mirna_pc |
| 24362 hsa-mir-323 | PSRC1     | 0.327913843 mirna_pc |
| 24363 hsa-mir-323 | C17orf107 | 0.368579724 mirna_pc |
| 24364 hsa-mir-323 | TRAF3     | 0.321809756 mirna_pc |
| 24365 hsa-mir-323 | DNMT3B    | 0.397678611 mirna_pc |
| 24366 hsa-mir-323 | PA2G4     | 0.311854035 mirna_pc |
| 24367 hsa-mir-323 | MTL 5.00  | 0.332152197 mirna_pc |
| 24368 hsa-mir-323 | CCNE1     | 0.3376807 mirna_pc   |
| 24369 hsa-mir-323 | RGL2      | 0.310924727 mirna_pc |
| 24370 hsa-mir-323 | TMEM150A  | 0.306988468 mirna_pc |
| 24371 hsa-mir-323 | EHMT2     | 0.389815732 mirna_pc |
| 24372 hsa-mir-323 | FHOD1     | 0.346269942 mirna_pc |
| 24373 hsa-mir-323 | CDRT4     | 0.36885825 mirna_pc  |
| 24374 hsa-mir-323 | DNAJC7    | 0.302984603 mirna_pc |
| 24375 hsa-mir-323 | ZNF595    | 0.320478083 mirna_pc |
| 24376 hsa-mir-323 | SLC2A6    | 0.331244479 mirna_pc |
| 24377 hsa-mir-323 | PA2G4P4   | 0.345738455 mirna_pc |
| 24378 hsa-mir-323 | NKIRAS2   | 0.33611914 mirna_pc  |
| 24379 hsa-mir-323 | MEX3A     | 0.447838225 mirna_pc |
| 24380 hsa-mir-323 | VAR5      | 0.311610562 mirna_pc |
| 24381 hsa-mir-323 | ACAN      | 0.648387217 mirna_pc |
| 24382 hsa-mir-323 | C16orf70  | 0.33730649 mirna_pc  |
| 24383 hsa-mir-323 | SCG5      | 0.423045526 mirna_pc |
| 24384 hsa-mir-323 | PXDN      | 0.318545583 mirna_pc |
| 24385 hsa-mir-323 | ATAD3B    | 0.300797243 mirna_pc |
| 24386 hsa-mir-323 | SCAND2    | 0.327112518 mirna_pc |
| 24387 hsa-mir-323 | ENPEP     | 0.300709507 mirna_pc |
| 24388 hsa-mir-323 | ITPRIPL1  | 0.301459194 mirna_pc |
| 24389 hsa-mir-323 | GDPD5     | 0.402603788 mirna_pc |
| 24390 hsa-mir-323 | SNORA8    | 0.363301632 mirna_pc |
| 24391 hsa-mir-323 | NID1      | 0.400579386 mirna_pc |
| 24392 hsa-mir-323 | TRPA1     | 0.352043884 mirna_pc |
| 24393 hsa-mir-323 | NAT9      | 0.338895979 mirna_pc |
| 24394 hsa-mir-323 | KIAA1731  | 0.323412519 mirna_pc |
| 24395 hsa-mir-323 | FKBP10    | 0.41855555 mirna_pc  |
| 24396 hsa-mir-323 | PCDHB5    | 0.312014685 mirna_pc |
| 24397 hsa-mir-323 | RDBP      | 0.36175945 mirna_pc  |
| 24398 hsa-mir-323 | SFMBT1    | 0.302393205 mirna_pc |
| 24399 hsa-mir-323 | LY86      | 0.32288597 mirna_pc  |
| 24400 hsa-mir-323 | ZNF697    | 0.35493423 mirna_pc  |
| 24401 hsa-mir-323 | CD200     | 0.306489971 mirna_pc |
| 24402 hsa-mir-323 | GPX7      | 0.342815336 mirna_pc |
| 24403 hsa-mir-323 | RNF41     | 0.434474925 mirna_pc |
| 24404 hsa-mir-323 | RFT1      | 0.340828479 mirna_pc |
| 24405 hsa-mir-323 | EGFLAM    | 0.377170875 mirna_pc |
| 24406 hsa-mir-323 | GLT8D1    | 0.373767022 mirna_pc |
| 24407 hsa-mir-323 | C9orf84   | 0.378173499 mirna_pc |



|                     |            |                      |
|---------------------|------------|----------------------|
| 24408 hsa-mir-323   | GALNT14    | 0.340273034 mirna_pc |
| 24409 hsa-mir-323   | CD69       | 0.336174156 mirna_pc |
| 24410 hsa-mir-323   | BCAT1      | 0.343280036 mirna_pc |
| 24411 hsa-mir-323   | N4BP2      | 0.310778015 mirna_pc |
| 24412 hsa-mir-323   | PBX2       | 0.356653669 mirna_pc |
| 24413 hsa-mir-323   | SNCAIP     | 0.576635837 mirna_pc |
| 24414 hsa-mir-323   | ZNF232     | 0.324928553 mirna_pc |
| 24415 hsa-mir-323   | KIF12      | 0.565467081 mirna_pc |
| 24416 hsa-mir-323   | RNF32      | 0.311943392 mirna_pc |
| 24417 hsa-mir-323   | C4A        | 0.399747727 mirna_pc |
| 24418 hsa-mir-323   | MED17      | 0.341887119 mirna_pc |
| 24419 hsa-mir-323   | HYOU1      | 0.470485542 mirna_pc |
| 24420 hsa-mir-323   | DHRS2      | 0.620588547 mirna_pc |
| 24421 hsa-mir-323   | CCDC102B   | 0.338857127 mirna_pc |
| 24422 hsa-mir-323   | LOC220594  | 0.330472769 mirna_pc |
| 24423 hsa-mir-323   | SMARCC2    | 0.321900689 mirna_pc |
| 24424 hsa-mir-323   | LOC645166  | 0.514931385 mirna_pc |
| 24425 hsa-mir-323   | NT5C3L     | 0.408583913 mirna_pc |
| 24426 hsa-mir-323   | WDR73      | 0.531274594 mirna_pc |
| 24427 hsa-mir-323   | PCDH18     | 0.34220886 mirna_pc  |
| 24428 hsa-mir-323   | NES        | 0.331632656 mirna_pc |
| 24429 hsa-mir-323   | GJC1       | 0.320816165 mirna_pc |
| 24430 hsa-mir-323   | DNMT3A     | 0.351160572 mirna_pc |
| 24431 hsa-mir-323   | FAM69B     | 0.332349522 mirna_pc |
| 24432 hsa-mir-323   | SLC2A8     | 0.355370637 mirna_pc |
| 24433 hsa-mir-511-2 | HBB        | 0.409969405 mirna_pc |
| 24434 hsa-mir-511-2 | LOC541471  | 0.357309159 mirna_pc |
| 24435 hsa-mir-511-2 | GLT25D1    | 0.384204776 mirna_pc |
| 24436 hsa-mir-511-2 | HBA1       | 0.394026803 mirna_pc |
| 24437 hsa-mir-511-2 | FAM64A     | 0.316715357 mirna_pc |
| 24438 hsa-mir-511-2 | NCRNA00152 | 0.305536923 mirna_pc |
| 24439 hsa-mir-511-2 | SERPINH1   | 0.305906274 mirna_pc |
| 24440 hsa-mir-511-2 | MYO1B      | 0.396381941 mirna_pc |
| 24441 hsa-mir-511-2 | SIGLEC7    | 0.425324382 mirna_pc |
| 24442 hsa-mir-511-2 | ENO1       | 0.302972401 mirna_pc |
| 24443 hsa-mir-511-2 | LAMC2      | 0.43731863 mirna_pc  |
| 24444 hsa-mir-511-2 | TMSB10     | 0.422240837 mirna_pc |
| 24445 hsa-mir-511-2 | CD80       | 0.481333411 mirna_pc |
| 24446 hsa-mir-511-2 | LDHA       | 0.355610674 mirna_pc |
| 24447 hsa-mir-511-2 | HBA2       | 0.33869217 mirna_pc  |
| 24448 hsa-mir-511-2 | RELT       | 0.425370169 mirna_pc |
| 24449 hsa-mir-511-2 | PLAU       | 0.374678518 mirna_pc |
| 24450 hsa-mir-511-2 | IFI30      | 0.316759235 mirna_pc |
| 24451 hsa-mir-511-2 | CLEC5A     | 0.42698678 mirna_pc  |
| 24452 hsa-mir-511-2 | SNX10      | 0.321178558 mirna_pc |
| 24453 hsa-mir-511-2 | S100A3     | 0.421193944 mirna_pc |
| 24454 hsa-mir-511-2 | CD300LF    | 0.409364176 mirna_pc |
| 24455 hsa-mir-511-2 | PLA2G7     | 0.37336392 mirna_pc  |
| 24456 hsa-mir-511-2 | PGK 1.00   | 0.310119039 mirna_pc |
| 24457 hsa-mir-511-2 | IFITM3     | 0.358181257 mirna_pc |
| 24458 hsa-mir-511-2 | CCL3       | 0.556267822 mirna_pc |
| 24459 hsa-mir-511-2 | EXT1       | 0.31474842 mirna_pc  |
| 24460 hsa-mir-511-2 | AGTRAP     | 0.319894876 mirna_pc |
| 24461 hsa-mir-511-2 | COL7A1     | 0.329949762 mirna_pc |

|       |               |          |             |          |
|-------|---------------|----------|-------------|----------|
| 24462 | hsa-mir-511-2 | CAPG     | 0.302927081 | mirna_pc |
| 24463 | hsa-mir-511-2 | FSCN1    | 0.327325147 | mirna_pc |
| 24464 | hsa-mir-511-2 | RGS19    | 0.383268113 | mirna_pc |
| 24465 | hsa-mir-511-2 | AP2S1    | 0.333501059 | mirna_pc |
| 24466 | hsa-mir-511-2 | NSUN5    | 0.302698101 | mirna_pc |
| 24467 | hsa-mir-511-2 | UBE2L6   | 0.372705044 | mirna_pc |
| 24468 | hsa-mir-511-2 | CCDC109B | 0.302886991 | mirna_pc |
| 24469 | hsa-mir-511-2 | PLOD1    | 0.315362587 | mirna_pc |
| 24470 | hsa-mir-511-2 | C17orf49 | 0.302692978 | mirna_pc |
| 24471 | hsa-mir-511-2 | CCL4L2   | 0.335903225 | mirna_pc |
| 24472 | hsa-mir-511-2 | FCGR1A   | 0.343341478 | mirna_pc |
| 24473 | hsa-mir-511-2 | MMP12    | 0.581051464 | mirna_pc |
| 24474 | hsa-mir-511-2 | OSCAR    | 0.578583875 | mirna_pc |
| 24475 | hsa-mir-511-2 | FOXD1    | 0.301026463 | mirna_pc |
| 24476 | hsa-mir-511-2 | SLC25A22 | 0.329331094 | mirna_pc |
| 24477 | hsa-mir-511-2 | WDR4     | 0.302734827 | mirna_pc |
| 24478 | hsa-mir-511-2 | RAC2     | 0.321750247 | mirna_pc |
| 24479 | hsa-mir-511-2 | TPD52L2  | 0.338504478 | mirna_pc |
| 24480 | hsa-mir-511-2 | LILRB5   | 0.316231182 | mirna_pc |
| 24481 | hsa-mir-511-2 | MT2A     | 0.328676216 | mirna_pc |
| 24482 | hsa-mir-511-2 | LRWD1    | 0.365376364 | mirna_pc |
| 24483 | hsa-mir-511-2 | FTSJ1    | 0.311958776 | mirna_pc |
| 24484 | hsa-mir-511-2 | KDELC1   | 0.377696683 | mirna_pc |
| 24485 | hsa-mir-511-2 | FCGR3A   | 0.42375667  | mirna_pc |
| 24486 | hsa-mir-511-2 | LILRB4   | 0.333170425 | mirna_pc |
| 24487 | hsa-mir-511-2 | BCL2A1   | 0.317472045 | mirna_pc |
| 24488 | hsa-mir-511-2 | NCF2     | 0.323651673 | mirna_pc |
| 24489 | hsa-mir-511-2 | TGFBI    | 0.345704381 | mirna_pc |
| 24490 | hsa-mir-511-2 | SLC2A6   | 0.341984268 | mirna_pc |
| 24491 | hsa-mir-511-2 | SEMA5B   | 0.430792331 | mirna_pc |
| 24492 | hsa-mir-511-2 | IGSF6    | 0.384409057 | mirna_pc |
| 24493 | hsa-mir-511-2 | CD86     | 0.376165872 | mirna_pc |
| 24494 | hsa-mir-511-2 | ITGAX    | 0.361041723 | mirna_pc |
| 24495 | hsa-mir-511-2 | TPI1     | 0.301560333 | mirna_pc |
| 24496 | hsa-mir-511-2 | FCER1G   | 0.459590705 | mirna_pc |
| 24497 | hsa-mir-511-2 | HAVCR2   | 0.374850323 | mirna_pc |
| 24498 | hsa-mir-511-2 | ACAN     | 0.317603146 | mirna_pc |
| 24499 | hsa-mir-511-2 | LDOC1    | 0.314176814 | mirna_pc |
| 24500 | hsa-mir-511-2 | MAN1B1   | 0.308580834 | mirna_pc |
| 24501 | hsa-mir-511-2 | COL27A1  | 0.328729692 | mirna_pc |
| 24502 | hsa-mir-511-2 | MNDA     | 0.436222192 | mirna_pc |
| 24503 | hsa-mir-511-2 | CD300A   | 0.431579457 | mirna_pc |
| 24504 | hsa-mir-511-2 | FCGR2A   | 0.604140404 | mirna_pc |
| 24505 | hsa-mir-511-2 | FAM26F   | 0.310489299 | mirna_pc |
| 24506 | hsa-mir-511-2 | C9orf30  | 0.319382216 | mirna_pc |
| 24507 | hsa-mir-511-2 | CLEC4A   | 0.479011618 | mirna_pc |
| 24508 | hsa-mir-511-2 | IL2RA    | 0.407920822 | mirna_pc |
| 24509 | hsa-mir-511-2 | GPSM1    | 0.373731625 | mirna_pc |
| 24510 | hsa-mir-511-2 | SLAMF8   | 0.403648401 | mirna_pc |
| 24511 | hsa-mir-511-2 | HK3      | 0.611825386 | mirna_pc |
| 24512 | hsa-mir-511-2 | ITGA3    | 0.360866129 | mirna_pc |
| 24513 | hsa-mir-511-2 | HES4     | 0.307633039 | mirna_pc |
| 24514 | hsa-mir-511-2 | LAPTM5   | 0.305428512 | mirna_pc |
| 24515 | hsa-mir-511-2 | C13orf27 | 0.303151644 | mirna_pc |

|       |               |           |             |          |
|-------|---------------|-----------|-------------|----------|
| 24516 | hsa-mir-511-2 | RAB7A     | 0.319483337 | mirna_pc |
| 24517 | hsa-mir-511-2 | MSR1      | 0.308134345 | mirna_pc |
| 24518 | hsa-mir-511-2 | RHOG      | 0.38341813  | mirna_pc |
| 24519 | hsa-mir-511-2 | CCL4      | 0.456715028 | mirna_pc |
| 24520 | hsa-mir-511-2 | CD14      | 0.522777702 | mirna_pc |
| 24521 | hsa-mir-511-2 | PLA2G15   | 0.32335523  | mirna_pc |
| 24522 | hsa-mir-511-2 | TLR2      | 0.323876436 | mirna_pc |
| 24523 | hsa-mir-511-2 | PILRA     | 0.407086682 | mirna_pc |
| 24524 | hsa-mir-511-2 | DRAP1     | 0.40282866  | mirna_pc |
| 24525 | hsa-mir-511-2 | B3GAT3    | 0.378184703 | mirna_pc |
| 24526 | hsa-mir-511-2 | CIQC      | 0.417510333 | mirna_pc |
| 24527 | hsa-mir-511-2 | TYROBP    | 0.368854327 | mirna_pc |
| 24528 | hsa-mir-511-2 | FAM65A    | 0.304472992 | mirna_pc |
| 24529 | hsa-mir-511-2 | SLC11A1   | 0.369355672 | mirna_pc |
| 24530 | hsa-mir-511-2 | CIQB      | 0.414340473 | mirna_pc |
| 24531 | hsa-mir-511-2 | LILRB2    | 0.424590059 | mirna_pc |
| 24532 | hsa-mir-511-2 | PSMC3     | 0.323849051 | mirna_pc |
| 24533 | hsa-mir-511-2 | LGALS1    | 0.390137895 | mirna_pc |
| 24534 | hsa-mir-511-2 | FOLR2     | 0.416180606 | mirna_pc |
| 24535 | hsa-mir-511-2 | ITGB2     | 0.387257026 | mirna_pc |
| 24536 | hsa-mir-511-2 | LST1      | 0.358868415 | mirna_pc |
| 24537 | hsa-mir-511-2 | AQP9      | 0.368607392 | mirna_pc |
| 24538 | hsa-mir-511-2 | CCM2      | 0.302652625 | mirna_pc |
| 24539 | hsa-mir-511-2 | PANX1     | 0.406957043 | mirna_pc |
| 24540 | hsa-mir-511-2 | PRSS23    | 0.326086574 | mirna_pc |
| 24541 | hsa-mir-511-2 | ACTB      | 0.33220284  | mirna_pc |
| 24542 | hsa-mir-511-2 | CYP26B1   | 0.332924192 | mirna_pc |
| 24543 | hsa-mir-511-2 | CCL18     | 0.425598198 | mirna_pc |
| 24544 | hsa-mir-511-2 | SH2B2     | 0.302178536 | mirna_pc |
| 24545 | hsa-mir-511-2 | FPR3      | 0.37968391  | mirna_pc |
| 24546 | hsa-mir-511-2 | MMP25     | 0.322059198 | mirna_pc |
| 24547 | hsa-mir-511-2 | SAMSN1    | 0.319637924 | mirna_pc |
| 24548 | hsa-mir-511-2 | SPI1      | 0.42122702  | mirna_pc |
| 24549 | hsa-mir-511-2 | PDPN      | 0.33415366  | mirna_pc |
| 24550 | hsa-mir-511-2 | CD4       | 0.329591839 | mirna_pc |
| 24551 | hsa-mir-511-2 | NECAP2    | 0.3517066   | mirna_pc |
| 24552 | hsa-mir-511-2 | LCP2      | 0.334479018 | mirna_pc |
| 24553 | hsa-mir-511-2 | AIF1      | 0.448702691 | mirna_pc |
| 24554 | hsa-mir-511-2 | KIAA1949  | 0.30318954  | mirna_pc |
| 24555 | hsa-mir-511-2 | LAIR1     | 0.360604974 | mirna_pc |
| 24556 | hsa-mir-511-2 | KMO       | 0.3081093   | mirna_pc |
| 24557 | hsa-mir-511-2 | MYO1G     | 0.375014742 | mirna_pc |
| 24558 | hsa-mir-511-2 | TMSL3     | 0.311135976 | mirna_pc |
| 24559 | hsa-mir-511-2 | CTSL1     | 0.367620113 | mirna_pc |
| 24560 | hsa-mir-511-2 | UROD      | 0.358675222 | mirna_pc |
| 24561 | hsa-mir-511-2 | TNFAIP8L2 | 0.356143743 | mirna_pc |
| 24562 | hsa-mir-511-2 | EMILIN2   | 0.412487914 | mirna_pc |
| 24563 | hsa-mir-511-2 | SIRPB1    | 0.34337278  | mirna_pc |
| 24564 | hsa-mir-511-2 | TMEM107   | 0.303611493 | mirna_pc |
| 24565 | hsa-mir-511-2 | C5AR1     | 0.314987018 | mirna_pc |
| 24566 | hsa-mir-511-2 | KIAA1644  | 0.323926362 | mirna_pc |
| 24567 | hsa-mir-511-2 | TLR8      | 0.340168064 | mirna_pc |
| 24568 | hsa-mir-511-2 | ITGA5     | 0.344166587 | mirna_pc |
| 24569 | hsa-mir-511-2 | LILRB1    | 0.373534146 | mirna_pc |

|                     |          |                      |
|---------------------|----------|----------------------|
| 24570 hsa-mir-511-2 | VIM      | 0.388191133 mirna_pc |
| 24571 hsa-mir-511-2 | TMEFF1   | 0.364643318 mirna_pc |
| 24572 hsa-mir-511-2 | GOLGA7B  | 0.305069905 mirna_pc |
| 24573 hsa-mir-511-2 | C1QA     | 0.446385492 mirna_pc |
| 24574 hsa-mir-511-2 | LRRC3    | 0.320964121 mirna_pc |
| 24575 hsa-mir-511-2 | RASGRP4  | 0.348391534 mirna_pc |
| 24576 hsa-mir-511-2 | SLC15A3  | 0.304327791 mirna_pc |
| 24577 hsa-mir-511-2 | MRC1     | 0.675876926 mirna_pc |
| 24578 hsa-mir-511-2 | C1QL1    | 0.370430907 mirna_pc |
| 24579 hsa-mir-511-2 | CCDC85B  | 0.335292339 mirna_pc |
| 24580 hsa-mir-511-2 | SERPINE1 | 0.524783663 mirna_pc |
| 24581 hsa-mir-511-2 | SIRPA    | 0.304036473 mirna_pc |
| 24582 hsa-mir-511-2 | CYBB     | 0.372395552 mirna_pc |
| 24583 hsa-mir-511-2 | MSN      | 0.365388676 mirna_pc |
| 24584 hsa-mir-511-2 | LILRA6   | 0.422677413 mirna_pc |
| 24585 hsa-mir-511-2 | PTRH1    | 0.356120286 mirna_pc |
| 24586 hsa-mir-511-2 | FCGR2B   | 0.379095134 mirna_pc |
| 24587 hsa-mir-511-2 | ADORA3   | 0.366631522 mirna_pc |
| 24588 hsa-mir-511-2 | SLC39A13 | 0.316497975 mirna_pc |
| 24589 hsa-mir-511-2 | CPA4     | 0.435616086 mirna_pc |
| 24590 hsa-mir-511-2 | GNA12    | 0.366122697 mirna_pc |
| 24591 hsa-mir-511-2 | ITGAM    | 0.333472529 mirna_pc |
| 24592 hsa-mir-511-2 | COL4A2   | 0.300744632 mirna_pc |
| 24593 hsa-mir-511-2 | LRRC25   | 0.388293881 mirna_pc |
| 24594 hsa-mir-511-2 | FADS3    | 0.390680664 mirna_pc |
| 24595 hsa-mir-511-2 | SNAI2    | 0.301534397 mirna_pc |
| 24596 hsa-mir-511-2 | SLC31A2  | 0.329693873 mirna_pc |
| 24597 hsa-mir-511-2 | GDI1     | 0.328380237 mirna_pc |
| 24598 hsa-mir-511-2 | CYTH4    | 0.403374713 mirna_pc |
| 24599 hsa-mir-511-2 | EIF2B3   | 0.359646251 mirna_pc |
| 24600 hsa-mir-511-2 | MRPS6    | 0.367306761 mirna_pc |
| 24601 hsa-mir-511-2 | ARHGAP22 | 0.302812682 mirna_pc |
| 24602 hsa-mir-511-2 | LILRB3   | 0.36372581 mirna_pc  |
| 24603 hsa-mir-511-2 | NLRP3    | 0.317250946 mirna_pc |
| 24604 hsa-mir-511-2 | PIK3CD   | 0.388862054 mirna_pc |
| 24605 hsa-mir-511-2 | CAV1     | 0.323896257 mirna_pc |
| 24606 hsa-mir-511-2 | ATOX1    | 0.375433008 mirna_pc |
| 24607 hsa-mir-511-2 | C3AR1    | 0.416100143 mirna_pc |
| 24608 hsa-mir-511-2 | CD209    | 0.49874141 mirna_pc  |
| 24609 hsa-mir-511-2 | CD163    | 0.39648075 mirna_pc  |
| 24610 hsa-mir-511-2 | LRRC33   | 0.314325456 mirna_pc |
| 24611 hsa-mir-511-2 | RAP1GDS1 | 0.367159733 mirna_pc |
| 24612 hsa-mir-511-2 | CD53     | 0.310981224 mirna_pc |
| 24613 hsa-mir-511-2 | TSSC4    | 0.327675579 mirna_pc |
| 24614 hsa-mir-511-2 | DOK2     | 0.428867862 mirna_pc |
| 24615 hsa-mir-511-2 | SRPK2    | 0.320346305 mirna_pc |
| 24616 hsa-mir-511-2 | NRG1     | 0.31090985 mirna_pc  |
| 24617 hsa-mir-511-2 | VSIG4    | 0.379815591 mirna_pc |
| 24618 hsa-mir-511-2 | AFAP1L1  | 0.355122129 mirna_pc |
| 24619 hsa-mir-511-2 | SRGN     | 0.45670061 mirna_pc  |
| 24620 hsa-mir-511-2 | HGF      | 0.369047532 mirna_pc |
| 24621 hsa-mir-511-2 | STK10    | 0.306054722 mirna_pc |
| 24622 hsa-mir-511-2 | VKORC1   | 0.307035769 mirna_pc |
| 24623 hsa-mir-511-2 | SGTB     | 0.325619294 mirna_pc |

|       |               |           |             |          |
|-------|---------------|-----------|-------------|----------|
| 24624 | hsa-mir-511-2 | HYOU1     | 0.323181178 | mirna_pc |
| 24625 | hsa-mir-511-2 | GPR68     | 0.360840959 | mirna_pc |
| 24626 | hsa-mir-511-2 | EMP3      | 0.355160616 | mirna_pc |
| 24627 | hsa-mir-511-2 | LPL       | 0.311086439 | mirna_pc |
| 24628 | hsa-mir-511-2 | P2RX5     | 0.302071106 | mirna_pc |
| 24629 | hsa-mir-511-2 | PEA15     | 0.349108159 | mirna_pc |
| 24630 | hsa-mir-511-2 | DKK 3.00  | 0.399081016 | mirna_pc |
| 24631 | hsa-mir-511-2 | C1orf162  | 0.370261178 | mirna_pc |
| 24632 | hsa-mir-511-2 | KIFC3     | 0.307378892 | mirna_pc |
| 24633 | hsa-mir-511-2 | FST       | 0.339995825 | mirna_pc |
| 24634 | hsa-mir-511-2 | HAS2      | 0.413913796 | mirna_pc |
| 24635 | hsa-mir-511-2 | LOC645166 | 0.366874817 | mirna_pc |
| 24636 | hsa-mir-511-2 | ODZ2      | 0.304406334 | mirna_pc |
| 24637 | hsa-mir-511-2 | FAM195B   | 0.307697586 | mirna_pc |
| 24638 | hsa-mir-511-2 | C9orf37   | 0.328649678 | mirna_pc |
| 24639 | hsa-mir-511-2 | MOBK12A   | 0.311691002 | mirna_pc |
| 24640 | hsa-mir-511-2 | OLFML2A   | 0.332028076 | mirna_pc |
| 24641 | hsa-mir-511-2 | CMKLR1    | 0.33924185  | mirna_pc |
| 24642 | hsa-mir-511-2 | RIC8A     | 0.338535997 | mirna_pc |
| 24643 | hsa-mir-511-2 | MS4A6A    | 0.310042196 | mirna_pc |
| 24644 | hsa-mir-511-2 | VEGFC     | 0.415334476 | mirna_pc |
| 24645 | hsa-mir-511-2 | CCR1      | 0.33667113  | mirna_pc |
| 24646 | hsa-mir-511-2 | ACP2      | 0.312475384 | mirna_pc |
| 24647 | hsa-mir-511-2 | C21orf7   | 0.477874387 | mirna_pc |
| 24648 | hsa-mir-511-2 | DFNA5     | 0.413687249 | mirna_pc |
| 24649 | hsa-mir-511-2 | MS4A7     | 0.336678297 | mirna_pc |
| 24650 | hsa-mir-511-2 | SIGLEC1   | 0.355838767 | mirna_pc |
| 24651 | hsa-mir-511-2 | HHLA3     | 0.342450235 | mirna_pc |
| 24652 | hsa-mir-511-2 | FGR       | 0.314913502 | mirna_pc |
| 24653 | hsa-mir-511-2 | FAM70B    | 0.307814731 | mirna_pc |
| 24654 | hsa-mir-511-2 | P4HA2     | 0.308720664 | mirna_pc |
| 24655 | hsa-mir-511-2 | MS4A4A    | 0.418691541 | mirna_pc |
| 24656 | hsa-mir-511-2 | DPM2      | 0.313329156 | mirna_pc |
| 24657 | hsa-mir-511-2 | ZC3HC1    | 0.342677157 | mirna_pc |
| 24658 | hsa-mir-511-2 | FEZ1      | 0.35078897  | mirna_pc |
| 24659 | hsa-mir-132   | TD02      | 0.355593029 | mirna_pc |
| 24660 | hsa-mir-132   | BUB3      | 0.323333855 | mirna_pc |
| 24661 | hsa-mir-132   | IL11      | 0.382755105 | mirna_pc |
| 24662 | hsa-mir-132   | SH2D2A    | 0.323339454 | mirna_pc |
| 24663 | hsa-mir-132   | PLAU      | 0.304264466 | mirna_pc |
| 24664 | hsa-mir-132   | IFI30     | 0.313500079 | mirna_pc |
| 24665 | hsa-mir-132   | CD300LF   | 0.330256855 | mirna_pc |
| 24666 | hsa-mir-132   | PLA2G7    | 0.321145315 | mirna_pc |
| 24667 | hsa-mir-132   | RCN1      | 0.314906296 | mirna_pc |
| 24668 | hsa-mir-132   | CCL3      | 0.324632821 | mirna_pc |
| 24669 | hsa-mir-132   | IL24      | 0.308753057 | mirna_pc |
| 24670 | hsa-mir-132   | IKBIP     | 0.326049244 | mirna_pc |
| 24671 | hsa-mir-132   | MMP1      | 0.318423642 | mirna_pc |
| 24672 | hsa-mir-132   | TIMP1     | 0.331019896 | mirna_pc |
| 24673 | hsa-mir-132   | BCL2A1    | 0.357051621 | mirna_pc |
| 24674 | hsa-mir-132   | CXCL6     | 0.352573508 | mirna_pc |
| 24675 | hsa-mir-132   | CD300A    | 0.412715528 | mirna_pc |
| 24676 | hsa-mir-132   | FCGR2A    | 0.316345799 | mirna_pc |
| 24677 | hsa-mir-132   | ASAP1     | 0.373804053 | mirna_pc |

|                   |          |                      |
|-------------------|----------|----------------------|
| 24678 hsa-mir-132 | CLEC4A   | 0.355479834 mirna_pc |
| 24679 hsa-mir-132 | C9orf110 | 0.360990749 mirna_pc |
| 24680 hsa-mir-132 | HK3      | 0.31573056 mirna_pc  |
| 24681 hsa-mir-132 | LAPTM5   | 0.347550522 mirna_pc |
| 24682 hsa-mir-132 | HMG2     | 0.305217664 mirna_pc |
| 24683 hsa-mir-132 | C5orf15  | 0.307366721 mirna_pc |
| 24684 hsa-mir-132 | GK       | 0.310082884 mirna_pc |
| 24685 hsa-mir-132 | LAMC3    | 0.36091897 mirna_pc  |
| 24686 hsa-mir-132 | LILRB2   | 0.328234911 mirna_pc |
| 24687 hsa-mir-132 | LST1     | 0.302520267 mirna_pc |
| 24688 hsa-mir-132 | ORA12    | 0.313072837 mirna_pc |
| 24689 hsa-mir-132 | MMP25    | 0.374939933 mirna_pc |
| 24690 hsa-mir-132 | SAMSN1   | 0.376217404 mirna_pc |
| 24691 hsa-mir-132 | LCP2     | 0.303631481 mirna_pc |
| 24692 hsa-mir-132 | AIF1     | 0.335727086 mirna_pc |
| 24693 hsa-mir-132 | LAT2     | 0.355432685 mirna_pc |
| 24694 hsa-mir-132 | COQ10A   | 0.340356659 mirna_pc |
| 24695 hsa-mir-132 | DOK3     | 0.322245908 mirna_pc |
| 24696 hsa-mir-132 | TFAM     | 0.318108127 mirna_pc |
| 24697 hsa-mir-132 | NRGN     | 0.307804556 mirna_pc |
| 24698 hsa-mir-132 | PTGIR    | 0.303493779 mirna_pc |
| 24699 hsa-mir-132 | PRR16    | 0.321304343 mirna_pc |
| 24700 hsa-mir-132 | LILRB1   | 0.343121964 mirna_pc |
| 24701 hsa-mir-132 | C8orf37  | 0.307638285 mirna_pc |
| 24702 hsa-mir-132 | EDNRA    | 0.304468432 mirna_pc |
| 24703 hsa-mir-132 | SLC35F2  | 0.300898262 mirna_pc |
| 24704 hsa-mir-132 | ZBTB10   | 0.320903245 mirna_pc |
| 24705 hsa-mir-132 | SLC43A3  | 0.303661434 mirna_pc |
| 24706 hsa-mir-132 | NPW      | 0.309808288 mirna_pc |
| 24707 hsa-mir-132 | SIPA1    | 0.304009706 mirna_pc |
| 24708 hsa-mir-132 | GRB14    | 0.429322977 mirna_pc |
| 24709 hsa-mir-132 | TRA2A    | 0.301602419 mirna_pc |
| 24710 hsa-mir-132 | LILRB3   | 0.310452033 mirna_pc |
| 24711 hsa-mir-132 | SERPINA1 | 0.337834586 mirna_pc |
| 24712 hsa-mir-132 | NLRP3    | 0.349598439 mirna_pc |
| 24713 hsa-mir-132 | TMEM22   | 0.30656851 mirna_pc  |
| 24714 hsa-mir-132 | BCCIP    | 0.324742871 mirna_pc |
| 24715 hsa-mir-132 | HLA-DRB5 | 0.344114323 mirna_pc |
| 24716 hsa-mir-132 | PSTK     | 0.30210361 mirna_pc  |
| 24717 hsa-mir-132 | GPR97    | 0.32599299 mirna_pc  |
| 24718 hsa-mir-132 | FMNL1    | 0.314970197 mirna_pc |
| 24719 hsa-mir-132 | SRGN     | 0.397908072 mirna_pc |
| 24720 hsa-mir-132 | PGBD3    | 0.300140726 mirna_pc |
| 24721 hsa-mir-132 | C10orf88 | 0.386683438 mirna_pc |
| 24722 hsa-mir-132 | GTF2H2B  | 0.319570862 mirna_pc |
| 24723 hsa-mir-132 | STARD3NL | 0.324240853 mirna_pc |
| 24724 hsa-mir-132 | HAPLN1   | 0.301307658 mirna_pc |
| 24725 hsa-mir-132 | POU2F2   | 0.305179261 mirna_pc |
| 24726 hsa-mir-132 | HSD17B14 | 0.30738148 mirna_pc  |
| 24727 hsa-mir-132 | CCDC102B | 0.319235776 mirna_pc |
| 24728 hsa-mir-132 | KDELC2   | 0.318230202 mirna_pc |
| 24729 hsa-mir-132 | FAM101B  | 0.321579498 mirna_pc |
| 24730 hsa-mir-132 | C21orf7  | 0.350397357 mirna_pc |
| 24731 hsa-mir-132 | LAMB1    | 0.323148071 mirna_pc |

|       |             |            |             |          |
|-------|-------------|------------|-------------|----------|
| 24732 | hsa-mir-132 | SLC2A3     | 0.351606578 | mirna_pc |
| 24733 | hsa-mir-616 | KIFC1      | 0.327348097 | mirna_pc |
| 24734 | hsa-mir-616 | CENPM      | 0.306390382 | mirna_pc |
| 24735 | hsa-mir-616 | BLM        | 0.333453359 | mirna_pc |
| 24736 | hsa-mir-616 | OIP5       | 0.302706467 | mirna_pc |
| 24737 | hsa-mir-616 | RAE1       | 0.301700641 | mirna_pc |
| 24738 | hsa-mir-616 | ZWILCH     | 0.367927518 | mirna_pc |
| 24739 | hsa-mir-616 | CDCA7      | 0.302591779 | mirna_pc |
| 24740 | hsa-mir-616 | SNTB1      | 0.447169737 | mirna_pc |
| 24741 | hsa-mir-616 | MTBP       | 0.353534212 | mirna_pc |
| 24742 | hsa-mir-616 | E2F1       | 0.347392531 | mirna_pc |
| 24743 | hsa-mir-616 | KLF2       | 0.407286732 | mirna_pc |
| 24744 | hsa-mir-616 | RFC3       | 0.398033714 | mirna_pc |
| 24745 | hsa-mir-616 | C5         | 0.335880487 | mirna_pc |
| 24746 | hsa-mir-616 | PSMB3      | 0.699559862 | mirna_pc |
| 24747 | hsa-mir-616 | TCF19      | 0.328256285 | mirna_pc |
| 24748 | hsa-mir-616 | CDK2       | 0.336438511 | mirna_pc |
| 24749 | hsa-mir-616 | CDK4       | 0.398982828 | mirna_pc |
| 24750 | hsa-mir-616 | PRIM1      | 0.313296794 | mirna_pc |
| 24751 | hsa-mir-616 | DSCC1      | 0.530857205 | mirna_pc |
| 24752 | hsa-mir-616 | CLN6       | 0.434455824 | mirna_pc |
| 24753 | hsa-mir-616 | ATIC       | 0.381790857 | mirna_pc |
| 24754 | hsa-mir-616 | GSTP1      | 0.485197354 | mirna_pc |
| 24755 | hsa-mir-616 | SNX8       | 0.357875135 | mirna_pc |
| 24756 | hsa-mir-616 | FAM122A    | 0.464419913 | mirna_pc |
| 24757 | hsa-mir-616 | MRPL13     | 0.339252468 | mirna_pc |
| 24758 | hsa-mir-616 | TMEM194A   | 0.358446556 | mirna_pc |
| 24759 | hsa-mir-616 | NOLC1      | 0.303603765 | mirna_pc |
| 24760 | hsa-mir-616 | METTL1     | 0.356059328 | mirna_pc |
| 24761 | hsa-mir-616 | HIF1AN     | 0.306190815 | mirna_pc |
| 24762 | hsa-mir-616 | SCARB1     | 0.338761159 | mirna_pc |
| 24763 | hsa-mir-616 | ANKRD13D   | 0.485201087 | mirna_pc |
| 24764 | hsa-mir-616 | ANO7       | 0.304866076 | mirna_pc |
| 24765 | hsa-mir-616 | TFR2       | 0.30307206  | mirna_pc |
| 24766 | hsa-mir-616 | CARD9      | 0.648014345 | mirna_pc |
| 24767 | hsa-mir-616 | YTHDF1     | 0.31092477  | mirna_pc |
| 24768 | hsa-mir-616 | RAB8A      | 0.656251792 | mirna_pc |
| 24769 | hsa-mir-616 | TRIB3      | 0.468406734 | mirna_pc |
| 24770 | hsa-mir-616 | IPO4       | 0.309145319 | mirna_pc |
| 24771 | hsa-mir-616 | GSTT1      | 0.317258649 | mirna_pc |
| 24772 | hsa-mir-616 | GRB7       | 0.475012026 | mirna_pc |
| 24773 | hsa-mir-616 | SPG21      | 0.362421595 | mirna_pc |
| 24774 | hsa-mir-616 | NMU        | 0.369517036 | mirna_pc |
| 24775 | hsa-mir-616 | MLLT6      | 0.334403813 | mirna_pc |
| 24776 | hsa-mir-616 | C17orf96   | 0.425870166 | mirna_pc |
| 24777 | hsa-mir-616 | SHMT2      | 0.432178819 | mirna_pc |
| 24778 | hsa-mir-616 | GPAM       | 0.330841856 | mirna_pc |
| 24779 | hsa-mir-616 | VARS       | 0.426650543 | mirna_pc |
| 24780 | hsa-mir-616 | C2orf29    | 0.320510552 | mirna_pc |
| 24781 | hsa-mir-616 | ADRBK1     | 0.748870489 | mirna_pc |
| 24782 | hsa-mir-616 | NCRNA00081 | 0.314733424 | mirna_pc |
| 24783 | hsa-mir-616 | C15orf44   | 0.307495916 | mirna_pc |
| 24784 | hsa-mir-616 | STK16      | 0.342110302 | mirna_pc |
| 24785 | hsa-mir-616 | FAM96A     | 0.313454705 | mirna_pc |

|                   |           |                      |
|-------------------|-----------|----------------------|
| 24786 hsa-mir-616 | CDK12     | 0.603382488 mirna_pc |
| 24787 hsa-mir-616 | NAGLU     | 0.335732072 mirna_pc |
| 24788 hsa-mir-616 | SPDEF     | 0.330617696 mirna_pc |
| 24789 hsa-mir-616 | GAL3ST1   | 0.353178391 mirna_pc |
| 24790 hsa-mir-616 | FAM188B   | 0.303372884 mirna_pc |
| 24791 hsa-mir-616 | GPC3      | 0.351863967 mirna_pc |
| 24792 hsa-mir-616 | C22orf13  | 0.351105175 mirna_pc |
| 24793 hsa-mir-616 | C19orf73  | 0.327825644 mirna_pc |
| 24794 hsa-mir-616 | EFCAB4B   | 0.458735252 mirna_pc |
| 24795 hsa-mir-616 | TTLL4     | 0.305398815 mirna_pc |
| 24796 hsa-mir-616 | NUDT8     | 0.430899564 mirna_pc |
| 24797 hsa-mir-616 | SFXN4     | 0.332097077 mirna_pc |
| 24798 hsa-mir-616 | HNF1B     | 0.30226661 mirna_pc  |
| 24799 hsa-mir-616 | NDUFV1    | 0.729684515 mirna_pc |
| 24800 hsa-mir-616 | ILVBL     | 0.470794041 mirna_pc |
| 24801 hsa-mir-616 | PCGF2     | 0.323692425 mirna_pc |
| 24802 hsa-mir-616 | CWF19L1   | 0.345453788 mirna_pc |
| 24803 hsa-mir-616 | LOC222699 | 0.311159929 mirna_pc |
| 24804 hsa-mir-616 | IDH1      | 0.387536896 mirna_pc |
| 24805 hsa-mir-616 | HHEX      | 0.469581208 mirna_pc |
| 24806 hsa-mir-616 | SMUG1     | 0.341687219 mirna_pc |
| 24807 hsa-mir-616 | PPP1R10   | 0.34565485 mirna_pc  |
| 24808 hsa-mir-616 | S100P     | 0.353588668 mirna_pc |
| 24809 hsa-mir-616 | PYCR1     | 0.344034477 mirna_pc |
| 24810 hsa-mir-616 | SERPINF2  | 0.346467108 mirna_pc |
| 24811 hsa-mir-616 | CREB3L4   | 0.504515307 mirna_pc |
| 24812 hsa-mir-616 | FZD5      | 0.381711354 mirna_pc |
| 24813 hsa-mir-616 | LOC151534 | 0.40836627 mirna_pc  |
| 24814 hsa-mir-616 | SLC35A1   | 0.362348379 mirna_pc |
| 24815 hsa-mir-616 | TJP2      | 0.317064278 mirna_pc |
| 24816 hsa-mir-616 | TPRN      | 0.3646486 mirna_pc   |
| 24817 hsa-mir-616 | RPL23     | 0.669031268 mirna_pc |
| 24818 hsa-mir-616 | GGT1      | 0.460941535 mirna_pc |
| 24819 hsa-mir-616 | SPRYD4    | 0.4325888 mirna_pc   |
| 24820 hsa-mir-616 | COASY     | 0.338955233 mirna_pc |
| 24821 hsa-mir-616 | ANXA9     | 0.441704497 mirna_pc |
| 24822 hsa-mir-616 | TRMT12    | 0.551984339 mirna_pc |
| 24823 hsa-mir-616 | MYEOV     | 0.457788115 mirna_pc |
| 24824 hsa-mir-616 | S100A4    | 0.3901834 mirna_pc   |
| 24825 hsa-mir-616 | STAT6     | 0.368121206 mirna_pc |
| 24826 hsa-mir-616 | C17orf37  | 0.386667609 mirna_pc |
| 24827 hsa-mir-616 | BRD4      | 0.301330234 mirna_pc |
| 24828 hsa-mir-616 | DDIT3     | 0.305424385 mirna_pc |
| 24829 hsa-mir-616 | FXN       | 0.409242227 mirna_pc |
| 24830 hsa-mir-616 | AKAP8     | 0.346669152 mirna_pc |
| 24831 hsa-mir-616 | NQO1      | 0.341149451 mirna_pc |
| 24832 hsa-mir-616 | SFXN2     | 0.344462856 mirna_pc |
| 24833 hsa-mir-616 | SUPT4H1   | 0.334234943 mirna_pc |
| 24834 hsa-mir-616 | CABIN1    | 0.316279558 mirna_pc |
| 24835 hsa-mir-616 | ACY3      | 0.621956373 mirna_pc |
| 24836 hsa-mir-616 | AP1M1     | 0.447997632 mirna_pc |
| 24837 hsa-mir-616 | ERBB2     | 0.552663202 mirna_pc |
| 24838 hsa-mir-616 | FBXL14    | 0.365923501 mirna_pc |
| 24839 hsa-mir-616 | MNX1      | 0.318080129 mirna_pc |



|       |             |          |             |          |
|-------|-------------|----------|-------------|----------|
| 24840 | hsa-mir-616 | C2orf72  | 0.457285933 | mirna_pc |
| 24841 | hsa-mir-616 | LFNG     | 0.358267588 | mirna_pc |
| 24842 | hsa-mir-616 | MTG1     | 0.371444676 | mirna_pc |
| 24843 | hsa-mir-616 | PIP4K2B  | 0.810163108 | mirna_pc |
| 24844 | hsa-mir-616 | ZDHHC6   | 0.327156866 | mirna_pc |
| 24845 | hsa-mir-616 | TMEM2    | 0.414221018 | mirna_pc |
| 24846 | hsa-mir-616 | SH3BP4   | 0.378255264 | mirna_pc |
| 24847 | hsa-mir-616 | FAM32A   | 0.458766616 | mirna_pc |
| 24848 | hsa-mir-616 | DECR2    | 0.349136164 | mirna_pc |
| 24849 | hsa-mir-616 | PCYT2    | 0.380172034 | mirna_pc |
| 24850 | hsa-mir-616 | IARS     | 0.318070523 | mirna_pc |
| 24851 | hsa-mir-616 | C2orf43  | 0.3059468   | mirna_pc |
| 24852 | hsa-mir-616 | CISD3    | 0.465576876 | mirna_pc |
| 24853 | hsa-mir-616 | LOC80054 | 0.313059487 | mirna_pc |
| 24854 | hsa-mir-616 | PNKD     | 0.511797294 | mirna_pc |
| 24855 | hsa-mir-616 | HDDC3    | 0.331651474 | mirna_pc |
| 24856 | hsa-mir-616 | MBD6     | 0.350916    | mirna_pc |
| 24857 | hsa-mir-616 | POLD4    | 0.701372359 | mirna_pc |
| 24858 | hsa-mir-616 | AARS     | 0.319929583 | mirna_pc |
| 24859 | hsa-mir-616 | PRDX3    | 0.332988598 | mirna_pc |
| 24860 | hsa-mir-616 | SNAPC5   | 0.438072465 | mirna_pc |
| 24861 | hsa-mir-616 | WIZ      | 0.464041367 | mirna_pc |
| 24862 | hsa-mir-616 | CWC25    | 0.333025952 | mirna_pc |
| 24863 | hsa-mir-616 | MARS     | 0.539806044 | mirna_pc |
| 24864 | hsa-mir-616 | PGAP3    | 0.696147877 | mirna_pc |
| 24865 | hsa-mir-616 | SSH3     | 0.652391186 | mirna_pc |
| 24866 | hsa-mir-576 | CENPF    | 0.326282445 | mirna_pc |
| 24867 | hsa-mir-576 | RCC2     | 0.409778538 | mirna_pc |
| 24868 | hsa-mir-576 | CCNA2    | 0.415560965 | mirna_pc |
| 24869 | hsa-mir-576 | FANCI    | 0.333128591 | mirna_pc |
| 24870 | hsa-mir-576 | MND1     | 0.329015185 | mirna_pc |
| 24871 | hsa-mir-576 | RAD54L   | 0.31920588  | mirna_pc |
| 24872 | hsa-mir-576 | MAD2L1   | 0.374564335 | mirna_pc |
| 24873 | hsa-mir-576 | TIMELESS | 0.313525934 | mirna_pc |
| 24874 | hsa-mir-576 | TROAP    | 0.32212957  | mirna_pc |
| 24875 | hsa-mir-576 | XPO1     | 0.365597812 | mirna_pc |
| 24876 | hsa-mir-576 | MCM2     | 0.31871014  | mirna_pc |
| 24877 | hsa-mir-576 | CCNF     | 0.340715727 | mirna_pc |
| 24878 | hsa-mir-576 | PLK4     | 0.406462741 | mirna_pc |
| 24879 | hsa-mir-576 | BLM      | 0.333185076 | mirna_pc |
| 24880 | hsa-mir-576 | DTL      | 0.346735786 | mirna_pc |
| 24881 | hsa-mir-576 | POLQ     | 0.363827169 | mirna_pc |
| 24882 | hsa-mir-576 | C1orf112 | 0.301067916 | mirna_pc |
| 24883 | hsa-mir-576 | NEIL3    | 0.380979328 | mirna_pc |
| 24884 | hsa-mir-576 | NCAPD2   | 0.317216054 | mirna_pc |
| 24885 | hsa-mir-576 | UCK2     | 0.368117378 | mirna_pc |
| 24886 | hsa-mir-576 | C15orf42 | 0.330467485 | mirna_pc |
| 24887 | hsa-mir-576 | CENPO    | 0.414945507 | mirna_pc |
| 24888 | hsa-mir-576 | XRCC2    | 0.308338403 | mirna_pc |
| 24889 | hsa-mir-576 | HMGB2    | 0.349586641 | mirna_pc |
| 24890 | hsa-mir-576 | CAD      | 0.349553345 | mirna_pc |
| 24891 | hsa-mir-576 | ZFP64    | 0.306781959 | mirna_pc |
| 24892 | hsa-mir-576 | CDK4     | 0.301333416 | mirna_pc |
| 24893 | hsa-mir-576 | TMEM108  | 0.324336253 | mirna_pc |

|                   |          |                      |
|-------------------|----------|----------------------|
| 24894 hsa-mir-576 | CHTF18   | 0.327467412 mirna_pc |
| 24895 hsa-mir-576 | MSH2     | 0.34730302 mirna_pc  |
| 24896 hsa-mir-576 | SF3B3    | 0.33959862 mirna_pc  |
| 24897 hsa-mir-576 | TOPBP1   | 0.325987856 mirna_pc |
| 24898 hsa-mir-576 | OTX1     | 0.307577902 mirna_pc |
| 24899 hsa-mir-576 | DDX12    | 0.413449719 mirna_pc |
| 24900 hsa-mir-576 | SRRT     | 0.301477264 mirna_pc |
| 24901 hsa-mir-576 | PSRC1    | 0.326506541 mirna_pc |
| 24902 hsa-mir-576 | PTK7     | 0.374476583 mirna_pc |
| 24903 hsa-mir-576 | GPR19    | 0.326102715 mirna_pc |
| 24904 hsa-mir-576 | GABPB1   | 0.366648075 mirna_pc |
| 24905 hsa-mir-576 | PPAT     | 0.311714894 mirna_pc |
| 24906 hsa-mir-576 | MORC2    | 0.353310703 mirna_pc |
| 24907 hsa-mir-576 | SFRS1    | 0.307664421 mirna_pc |
| 24908 hsa-mir-576 | ATXN2L   | 0.316554154 mirna_pc |
| 24909 hsa-mir-576 | C4orf46  | 0.352322472 mirna_pc |
| 24910 hsa-mir-576 | POLR2D   | 0.336308591 mirna_pc |
| 24911 hsa-mir-576 | TUB      | 0.356417983 mirna_pc |
| 24912 hsa-mir-576 | YEATS2   | 0.33376048 mirna_pc  |
| 24913 hsa-mir-576 | PARP1    | 0.300897126 mirna_pc |
| 24914 hsa-mir-576 | C4orf21  | 0.396562395 mirna_pc |
| 24915 hsa-mir-576 | TMEM194A | 0.442744293 mirna_pc |
| 24916 hsa-mir-576 | CEP135   | 0.310895108 mirna_pc |
| 24917 hsa-mir-576 | ELK1     | 0.304028031 mirna_pc |
| 24918 hsa-mir-576 | XPO5     | 0.311164125 mirna_pc |
| 24919 hsa-mir-576 | ANKRD13D | 0.316373535 mirna_pc |
| 24920 hsa-mir-576 | TET3     | 0.300404732 mirna_pc |
| 24921 hsa-mir-576 | HNRNP    | 0.31567943 mirna_pc  |
| 24922 hsa-mir-576 | C4orf41  | 0.331581977 mirna_pc |
| 24923 hsa-mir-576 | QTRTD1   | 0.306766034 mirna_pc |
| 24924 hsa-mir-576 | EHMT2    | 0.327046085 mirna_pc |
| 24925 hsa-mir-576 | UBAP2L   | 0.37844754 mirna_pc  |
| 24926 hsa-mir-576 | PASK     | 0.359118153 mirna_pc |
| 24927 hsa-mir-576 | RPGRIP1L | 0.30710645 mirna_pc  |
| 24928 hsa-mir-576 | MFSD2A   | 0.463318838 mirna_pc |
| 24929 hsa-mir-576 | LSM 6.00 | 0.318687661 mirna_pc |
| 24930 hsa-mir-576 | PRAME    | 0.399664312 mirna_pc |
| 24931 hsa-mir-576 | FUBP1    | 0.37281537 mirna_pc  |
| 24932 hsa-mir-576 | SART3    | 0.333905015 mirna_pc |
| 24933 hsa-mir-576 | SR140    | 0.356175827 mirna_pc |
| 24934 hsa-mir-576 | TRA2B    | 0.34713291 mirna_pc  |
| 24935 hsa-mir-576 | GAR1     | 0.417282821 mirna_pc |
| 24936 hsa-mir-576 | ENOPH1   | 0.314477438 mirna_pc |
| 24937 hsa-mir-576 | ING5     | 0.31269741 mirna_pc  |
| 24938 hsa-mir-576 | SFPQ     | 0.34922571 mirna_pc  |
| 24939 hsa-mir-576 | CNOT3    | 0.344373515 mirna_pc |
| 24940 hsa-mir-576 | CADM1    | 0.36903374 mirna_pc  |
| 24941 hsa-mir-576 | C10orf2  | 0.306489994 mirna_pc |
| 24942 hsa-mir-576 | POGK     | 0.359129624 mirna_pc |
| 24943 hsa-mir-576 | CPAMD8   | 0.365712342 mirna_pc |
| 24944 hsa-mir-576 | FAM86C   | 0.344903374 mirna_pc |
| 24945 hsa-mir-576 | ZNF107   | 0.334027374 mirna_pc |
| 24946 hsa-mir-576 | MSH6     | 0.374231357 mirna_pc |
| 24947 hsa-mir-576 | TP73     | 0.400150427 mirna_pc |

|                   |           |                      |
|-------------------|-----------|----------------------|
| 24948 hsa-mir-576 | LEF1      | 0.319437106 mirna_pc |
| 24949 hsa-mir-576 | KREMEN2   | 0.351142291 mirna_pc |
| 24950 hsa-mir-576 | ZBED4     | 0.326575991 mirna_pc |
| 24951 hsa-mir-576 | MEX3A     | 0.422906705 mirna_pc |
| 24952 hsa-mir-576 | ZNF236    | 0.362181832 mirna_pc |
| 24953 hsa-mir-576 | NGFR      | 0.300965444 mirna_pc |
| 24954 hsa-mir-576 | PDCD11    | 0.390397026 mirna_pc |
| 24955 hsa-mir-576 | TRIM28    | 0.40639392 mirna_pc  |
| 24956 hsa-mir-576 | ADRBK1    | 0.396132846 mirna_pc |
| 24957 hsa-mir-576 | NAA15     | 0.365393674 mirna_pc |
| 24958 hsa-mir-576 | ZBTB12    | 0.347612091 mirna_pc |
| 24959 hsa-mir-576 | LOC642846 | 0.418695249 mirna_pc |
| 24960 hsa-mir-576 | TGIF2     | 0.376719449 mirna_pc |
| 24961 hsa-mir-576 | ZC3H18    | 0.310189483 mirna_pc |
| 24962 hsa-mir-576 | C15orf44  | 0.304001883 mirna_pc |
| 24963 hsa-mir-576 | RCN2      | 0.368517993 mirna_pc |
| 24964 hsa-mir-576 | POLE      | 0.42206082 mirna_pc  |
| 24965 hsa-mir-576 | RBM14     | 0.306437538 mirna_pc |
| 24966 hsa-mir-576 | GMEB2     | 0.340007227 mirna_pc |
| 24967 hsa-mir-576 | CDK16     | 0.314481119 mirna_pc |
| 24968 hsa-mir-576 | IGSF9     | 0.511634134 mirna_pc |
| 24969 hsa-mir-576 | PLXNA1    | 0.320488321 mirna_pc |
| 24970 hsa-mir-576 | FIP1L1    | 0.312900592 mirna_pc |
| 24971 hsa-mir-576 | GTF3C2    | 0.316705428 mirna_pc |
| 24972 hsa-mir-576 | WDR90     | 0.325378901 mirna_pc |
| 24973 hsa-mir-576 | TMEM151B  | 0.455189511 mirna_pc |
| 24974 hsa-mir-576 | ZC3H7B    | 0.33194877 mirna_pc  |
| 24975 hsa-mir-576 | RG9MTD2   | 0.322414823 mirna_pc |
| 24976 hsa-mir-576 | MTMR15    | 0.315586327 mirna_pc |
| 24977 hsa-mir-576 | TTL4      | 0.455592427 mirna_pc |
| 24978 hsa-mir-576 | FOKK2     | 0.341613075 mirna_pc |
| 24979 hsa-mir-576 | C20orf177 | 0.305674823 mirna_pc |
| 24980 hsa-mir-576 | UBXN7     | 0.304526671 mirna_pc |
| 24981 hsa-mir-576 | ATN1      | 0.359544476 mirna_pc |
| 24982 hsa-mir-576 | DVL3      | 0.35940992 mirna_pc  |
| 24983 hsa-mir-576 | PPP2R5D   | 0.307308484 mirna_pc |
| 24984 hsa-mir-576 | ARNT2     | 0.382363926 mirna_pc |
| 24985 hsa-mir-576 | ZNF286A   | 0.337650121 mirna_pc |
| 24986 hsa-mir-576 | PRRT2     | 0.307078888 mirna_pc |
| 24987 hsa-mir-576 | MLL2      | 0.309140694 mirna_pc |
| 24988 hsa-mir-576 | RFX7      | 0.305248809 mirna_pc |
| 24989 hsa-mir-576 | NDUFV1    | 0.306621457 mirna_pc |
| 24990 hsa-mir-576 | ZNF497    | 0.321766502 mirna_pc |
| 24991 hsa-mir-576 | ZNF84     | 0.316905421 mirna_pc |
| 24992 hsa-mir-576 | LRRTM2    | 0.318213543 mirna_pc |
| 24993 hsa-mir-576 | ZNF286B   | 0.303808268 mirna_pc |
| 24994 hsa-mir-576 | INPPL1    | 0.353825535 mirna_pc |
| 24995 hsa-mir-576 | HUNK      | 0.320485636 mirna_pc |
| 24996 hsa-mir-576 | CRAMP1L   | 0.353079119 mirna_pc |
| 24997 hsa-mir-576 | LOC646851 | 0.300492373 mirna_pc |
| 24998 hsa-mir-576 | SCLY      | 0.364523807 mirna_pc |
| 24999 hsa-mir-576 | CAP1      | 0.43437505 mirna_pc  |
| 25000 hsa-mir-576 | GSTCD     | 0.390796497 mirna_pc |
| 25001 hsa-mir-576 | ELFN1     | 0.306668934 mirna_pc |

|                   |          |                      |
|-------------------|----------|----------------------|
| 25002 hsa-mir-576 | HNRNPA3  | 0.306398284 mirna_pc |
| 25003 hsa-mir-576 | EWSR1    | 0.34855134 mirna_pc  |
| 25004 hsa-mir-576 | DHX57    | 0.32400373 mirna_pc  |
| 25005 hsa-mir-576 | NUMA1    | 0.352510527 mirna_pc |
| 25006 hsa-mir-576 | ALX3     | 0.431274229 mirna_pc |
| 25007 hsa-mir-576 | SUPT7L   | 0.312766952 mirna_pc |
| 25008 hsa-mir-576 | DGCR8    | 0.318208468 mirna_pc |
| 25009 hsa-mir-576 | ZNF512B  | 0.300056027 mirna_pc |
| 25010 hsa-mir-576 | SFRS7    | 0.300277932 mirna_pc |
| 25011 hsa-mir-576 | TRIT1    | 0.382651386 mirna_pc |
| 25012 hsa-mir-576 | RBM10    | 0.332113854 mirna_pc |
| 25013 hsa-mir-576 | BAT2     | 0.32632857 mirna_pc  |
| 25014 hsa-mir-576 | EDAR     | 0.389354952 mirna_pc |
| 25015 hsa-mir-576 | ZNF304   | 0.317875695 mirna_pc |
| 25016 hsa-mir-576 | NIPSNAP1 | 0.312776753 mirna_pc |
| 25017 hsa-mir-576 | WEE1     | 0.300765711 mirna_pc |
| 25018 hsa-mir-576 | KDM4A    | 0.341665728 mirna_pc |
| 25019 hsa-mir-576 | MGC2752  | 0.355774794 mirna_pc |
| 25020 hsa-mir-576 | TIGD2    | 0.338813398 mirna_pc |
| 25021 hsa-mir-576 | ATF5     | 0.348472448 mirna_pc |
| 25022 hsa-mir-576 | DCTD     | 0.313461065 mirna_pc |
| 25023 hsa-mir-576 | MCM3APAS | 0.348183744 mirna_pc |
| 25024 hsa-mir-576 | HCFC1    | 0.308850914 mirna_pc |
| 25025 hsa-mir-576 | EIF4G1   | 0.307896833 mirna_pc |
| 25026 hsa-mir-576 | BCAN     | 0.498126025 mirna_pc |
| 25027 hsa-mir-576 | PPFIA4   | 0.302552527 mirna_pc |
| 25028 hsa-mir-576 | LRP6     | 0.316017483 mirna_pc |
| 25029 hsa-mir-576 | DCP2     | 0.302923828 mirna_pc |
| 25030 hsa-mir-576 | C2orf44  | 0.337243443 mirna_pc |
| 25031 hsa-mir-576 | SEPHS1   | 0.320480149 mirna_pc |
| 25032 hsa-mir-576 | CBX5     | 0.359250989 mirna_pc |
| 25033 hsa-mir-576 | RYK      | 0.373082108 mirna_pc |
| 25034 hsa-mir-576 | ADNP     | 0.318738711 mirna_pc |
| 25035 hsa-mir-576 | IFT172   | 0.302674654 mirna_pc |
| 25036 hsa-mir-576 | TTC30B   | 0.331229598 mirna_pc |
| 25037 hsa-mir-576 | MSL2     | 0.347532195 mirna_pc |
| 25038 hsa-mir-576 | AGBL5    | 0.379593035 mirna_pc |
| 25039 hsa-mir-576 | VASH2    | 0.432938931 mirna_pc |
| 25040 hsa-mir-576 | PDCD7    | 0.345876933 mirna_pc |
| 25041 hsa-mir-576 | SENP5    | 0.372380335 mirna_pc |
| 25042 hsa-mir-576 | ZNF384   | 0.32219648 mirna_pc  |
| 25043 hsa-mir-576 | AARS2    | 0.310308061 mirna_pc |
| 25044 hsa-mir-576 | PAN2     | 0.301721867 mirna_pc |
| 25045 hsa-mir-576 | ZNF518B  | 0.308629473 mirna_pc |
| 25046 hsa-mir-576 | CHST11   | 0.318045316 mirna_pc |
| 25047 hsa-mir-576 | BCL11A   | 0.485225994 mirna_pc |
| 25048 hsa-mir-576 | USP21    | 0.313891978 mirna_pc |
| 25049 hsa-mir-576 | ALMS1    | 0.370494448 mirna_pc |
| 25050 hsa-mir-576 | PRR12    | 0.360904221 mirna_pc |
| 25051 hsa-mir-576 | ZNF74    | 0.309247544 mirna_pc |
| 25052 hsa-mir-576 | RAD52    | 0.340164147 mirna_pc |
| 25053 hsa-mir-576 | SRF      | 0.317745464 mirna_pc |
| 25054 hsa-mir-576 | EMID1    | 0.371943499 mirna_pc |
| 25055 hsa-mir-576 | ZMYM4    | 0.369497634 mirna_pc |

|       |             |           |             |          |
|-------|-------------|-----------|-------------|----------|
| 25056 | hsa-mir-576 | MOXD1     | 0.31122219  | mirna_pc |
| 25057 | hsa-mir-576 | THAP9     | 0.304503966 | mirna_pc |
| 25058 | hsa-mir-576 | CNIH2     | 0.306705999 | mirna_pc |
| 25059 | hsa-mir-576 | LOC400657 | 0.39750956  | mirna_pc |
| 25060 | hsa-mir-576 | POLH      | 0.310123715 | mirna_pc |
| 25061 | hsa-mir-576 | TJAP1     | 0.301033109 | mirna_pc |
| 25062 | hsa-mir-576 | TFDP2     | 0.356487227 | mirna_pc |
| 25063 | hsa-mir-576 | QRICH2    | 0.375453495 | mirna_pc |
| 25064 | hsa-mir-576 | MYCN      | 0.313236781 | mirna_pc |
| 25065 | hsa-mir-576 | WDR33     | 0.316079039 | mirna_pc |
| 25066 | hsa-mir-576 | DCAF16    | 0.333737075 | mirna_pc |
| 25067 | hsa-mir-576 | SBK1      | 0.307632472 | mirna_pc |
| 25068 | hsa-mir-576 | PABPC4L   | 0.357809117 | mirna_pc |
| 25069 | hsa-mir-576 | USP13     | 0.355869162 | mirna_pc |
| 25070 | hsa-mir-576 | DENND4B   | 0.313778081 | mirna_pc |
| 25071 | hsa-mir-576 | C16orf46  | 0.352720539 | mirna_pc |
| 25072 | hsa-mir-576 | CLPB      | 0.35181208  | mirna_pc |
| 25073 | hsa-mir-576 | ZNF740    | 0.305707389 | mirna_pc |
| 25074 | hsa-mir-576 | EP400     | 0.334811327 | mirna_pc |
| 25075 | hsa-mir-576 | CUL7      | 0.357408201 | mirna_pc |
| 25076 | hsa-mir-576 | TRO       | 0.369225845 | mirna_pc |
| 25077 | hsa-mir-576 | DDX51     | 0.332298871 | mirna_pc |
| 25078 | hsa-mir-576 | NSD1      | 0.330747575 | mirna_pc |
| 25079 | hsa-mir-576 | ZBTB39    | 0.393197922 | mirna_pc |
| 25080 | hsa-mir-576 | EDC3      | 0.326712676 | mirna_pc |
| 25081 | hsa-mir-576 | RPS10P7   | 0.315254556 | mirna_pc |
| 25082 | hsa-mir-576 | ZNF827    | 0.380833369 | mirna_pc |
| 25083 | hsa-mir-576 | C20orf12  | 0.393413037 | mirna_pc |
| 25084 | hsa-mir-576 | VPS54     | 0.376236207 | mirna_pc |
| 25085 | hsa-mir-576 | PIP4K2B   | 0.444846546 | mirna_pc |
| 25086 | hsa-mir-576 | ENTPD2    | 0.31994883  | mirna_pc |
| 25087 | hsa-mir-576 | MYCL1     | 0.377947175 | mirna_pc |
| 25088 | hsa-mir-576 | ZNF618    | 0.348572632 | mirna_pc |
| 25089 | hsa-mir-576 | POM121C   | 0.337152472 | mirna_pc |
| 25090 | hsa-mir-576 | C22orf30  | 0.357438121 | mirna_pc |
| 25091 | hsa-mir-576 | CCDC111   | 0.323462034 | mirna_pc |
| 25092 | hsa-mir-576 | CCDC157   | 0.372763961 | mirna_pc |
| 25093 | hsa-mir-576 | STK35     | 0.352530848 | mirna_pc |
| 25094 | hsa-mir-576 | SCML2     | 0.368058558 | mirna_pc |
| 25095 | hsa-mir-576 | SH3BP5L   | 0.312402644 | mirna_pc |
| 25096 | hsa-mir-576 | DIS3L2    | 0.301396753 | mirna_pc |
| 25097 | hsa-mir-576 | COL9A2    | 0.335467877 | mirna_pc |
| 25098 | hsa-mir-576 | ZNF8      | 0.310640185 | mirna_pc |
| 25099 | hsa-mir-576 | ETV5      | 0.365396829 | mirna_pc |
| 25100 | hsa-mir-576 | COL9A3    | 0.342562145 | mirna_pc |
| 25101 | hsa-mir-576 | KIAA1430  | 0.317102746 | mirna_pc |
| 25102 | hsa-mir-576 | IGHMBP2   | 0.355746281 | mirna_pc |
| 25103 | hsa-mir-576 | LGR6      | 0.320444454 | mirna_pc |
| 25104 | hsa-mir-576 | ZBTB45    | 0.334613046 | mirna_pc |
| 25105 | hsa-mir-576 | DNAL4     | 0.326658502 | mirna_pc |
| 25106 | hsa-mir-576 | KLHDC3    | 0.327009698 | mirna_pc |
| 25107 | hsa-mir-576 | MAML1     | 0.301853746 | mirna_pc |
| 25108 | hsa-mir-576 | B4GALNT4  | 0.409319794 | mirna_pc |
| 25109 | hsa-mir-576 | HSDL1     | 0.323147918 | mirna_pc |

|                    |          |                      |
|--------------------|----------|----------------------|
| 25110 hsa-mir-576  | MBD6     | 0.323824489 mirna_pc |
| 25111 hsa-mir-576  | ZNF543   | 0.305495239 mirna_pc |
| 25112 hsa-mir-576  | SMARCAD1 | 0.404477637 mirna_pc |
| 25113 hsa-mir-576  | C22orf29 | 0.410673528 mirna_pc |
| 25114 hsa-mir-576  | DNMT3A   | 0.435925242 mirna_pc |
| 25115 hsa-mir-576  | POM121   | 0.35741528 mirna_pc  |
| 25116 hsa-mir-130b | TPX2     | 0.339732301 mirna_pc |
| 25117 hsa-mir-130b | CENPF    | 0.33822267 mirna_pc  |
| 25118 hsa-mir-130b | RCC2     | 0.394527718 mirna_pc |
| 25119 hsa-mir-130b | HOXC9    | 0.461154646 mirna_pc |
| 25120 hsa-mir-130b | KIF11    | 0.363604859 mirna_pc |
| 25121 hsa-mir-130b | ECT2     | 0.308747853 mirna_pc |
| 25122 hsa-mir-130b | RRM2     | 0.426670386 mirna_pc |
| 25123 hsa-mir-130b | SPC24    | 0.306380128 mirna_pc |
| 25124 hsa-mir-130b | CDK1     | 0.314652805 mirna_pc |
| 25125 hsa-mir-130b | CDC25C   | 0.307410097 mirna_pc |
| 25126 hsa-mir-130b | MYBL2    | 0.300710286 mirna_pc |
| 25127 hsa-mir-130b | PLK1     | 0.35541486 mirna_pc  |
| 25128 hsa-mir-130b | UBE2C    | 0.33642474 mirna_pc  |
| 25129 hsa-mir-130b | BUB1     | 0.330819086 mirna_pc |
| 25130 hsa-mir-130b | PRC1     | 0.326235855 mirna_pc |
| 25131 hsa-mir-130b | NUSAP1   | 0.39489544 mirna_pc  |
| 25132 hsa-mir-130b | KIFC1    | 0.384254057 mirna_pc |
| 25133 hsa-mir-130b | BUB1B    | 0.404008945 mirna_pc |
| 25134 hsa-mir-130b | KIF18B   | 0.374046398 mirna_pc |
| 25135 hsa-mir-130b | KIF2C    | 0.383509534 mirna_pc |
| 25136 hsa-mir-130b | FANCA    | 0.308163815 mirna_pc |
| 25137 hsa-mir-130b | NCAPG    | 0.333056105 mirna_pc |
| 25138 hsa-mir-130b | CCNA2    | 0.487321394 mirna_pc |
| 25139 hsa-mir-130b | SPC25    | 0.404421007 mirna_pc |
| 25140 hsa-mir-130b | FANCI    | 0.436126558 mirna_pc |
| 25141 hsa-mir-130b | NEK2     | 0.422640659 mirna_pc |
| 25142 hsa-mir-130b | MND1     | 0.530291169 mirna_pc |
| 25143 hsa-mir-130b | KIF22    | 0.422993037 mirna_pc |
| 25144 hsa-mir-130b | NCAPH    | 0.444199247 mirna_pc |
| 25145 hsa-mir-130b | GTSE1    | 0.398766091 mirna_pc |
| 25146 hsa-mir-130b | RAD54L   | 0.506255901 mirna_pc |
| 25147 hsa-mir-130b | CENPA    | 0.465509882 mirna_pc |
| 25148 hsa-mir-130b | MAD2L1   | 0.553432535 mirna_pc |
| 25149 hsa-mir-130b | TIMELESS | 0.467432995 mirna_pc |
| 25150 hsa-mir-130b | LMNB1    | 0.361000728 mirna_pc |
| 25151 hsa-mir-130b | CDCA8    | 0.418099444 mirna_pc |
| 25152 hsa-mir-130b | TROAP    | 0.434851322 mirna_pc |
| 25153 hsa-mir-130b | CDCA5    | 0.33428224 mirna_pc  |
| 25154 hsa-mir-130b | TACC3    | 0.31484534 mirna_pc  |
| 25155 hsa-mir-130b | XPO1     | 0.305677646 mirna_pc |
| 25156 hsa-mir-130b | CDC45    | 0.391714219 mirna_pc |
| 25157 hsa-mir-130b | STMN1    | 0.512022053 mirna_pc |
| 25158 hsa-mir-130b | CENPM    | 0.386962983 mirna_pc |
| 25159 hsa-mir-130b | EXO1     | 0.358165117 mirna_pc |
| 25160 hsa-mir-130b | UBE2T    | 0.360243326 mirna_pc |
| 25161 hsa-mir-130b | CKS1B    | 0.391953035 mirna_pc |
| 25162 hsa-mir-130b | TUBB     | 0.375710232 mirna_pc |
| 25163 hsa-mir-130b | MCM2     | 0.383772346 mirna_pc |

|                    |          |                      |
|--------------------|----------|----------------------|
| 25164 hsa-mir-130b | KIF4A    | 0.338367995 mirna_pc |
| 25165 hsa-mir-130b | ORC1L    | 0.346600978 mirna_pc |
| 25166 hsa-mir-130b | KNTC1    | 0.391895834 mirna_pc |
| 25167 hsa-mir-130b | UHRF1    | 0.329718272 mirna_pc |
| 25168 hsa-mir-130b | CCNF     | 0.306213491 mirna_pc |
| 25169 hsa-mir-130b | RACGAP1  | 0.313041097 mirna_pc |
| 25170 hsa-mir-130b | PTBP1    | 0.322129453 mirna_pc |
| 25171 hsa-mir-130b | CCNB2    | 0.40637793 mirna_pc  |
| 25172 hsa-mir-130b | NUF2     | 0.349493178 mirna_pc |
| 25173 hsa-mir-130b | SFRP1    | 0.31460628 mirna_pc  |
| 25174 hsa-mir-130b | PLK4     | 0.486171396 mirna_pc |
| 25175 hsa-mir-130b | KIF18A   | 0.331226369 mirna_pc |
| 25176 hsa-mir-130b | DEPDC1   | 0.368395832 mirna_pc |
| 25177 hsa-mir-130b | HJURP    | 0.358390101 mirna_pc |
| 25178 hsa-mir-130b | RAD51    | 0.346866214 mirna_pc |
| 25179 hsa-mir-130b | BLM      | 0.43686743 mirna_pc  |
| 25180 hsa-mir-130b | PAICS    | 0.385373496 mirna_pc |
| 25181 hsa-mir-130b | BIRC5    | 0.398744574 mirna_pc |
| 25182 hsa-mir-130b | RCC1     | 0.309092617 mirna_pc |
| 25183 hsa-mir-130b | OIP5     | 0.356739329 mirna_pc |
| 25184 hsa-mir-130b | DTL      | 0.429270651 mirna_pc |
| 25185 hsa-mir-130b | EME1     | 0.343788784 mirna_pc |
| 25186 hsa-mir-130b | AURKB    | 0.445634686 mirna_pc |
| 25187 hsa-mir-130b | GSG2     | 0.316137821 mirna_pc |
| 25188 hsa-mir-130b | CDT1     | 0.327834992 mirna_pc |
| 25189 hsa-mir-130b | MCM10    | 0.362172112 mirna_pc |
| 25190 hsa-mir-130b | SGOL2    | 0.325441534 mirna_pc |
| 25191 hsa-mir-130b | CHEK2    | 0.388446371 mirna_pc |
| 25192 hsa-mir-130b | KIF15    | 0.332645976 mirna_pc |
| 25193 hsa-mir-130b | CDCA3    | 0.423403679 mirna_pc |
| 25194 hsa-mir-130b | C1orf112 | 0.342793188 mirna_pc |
| 25195 hsa-mir-130b | GINS1    | 0.319556035 mirna_pc |
| 25196 hsa-mir-130b | TRAIP    | 0.303209776 mirna_pc |
| 25197 hsa-mir-130b | ORC6L    | 0.343449744 mirna_pc |
| 25198 hsa-mir-130b | C16orf59 | 0.415769491 mirna_pc |
| 25199 hsa-mir-130b | NEIL3    | 0.389731883 mirna_pc |
| 25200 hsa-mir-130b | MCM7     | 0.343039102 mirna_pc |
| 25201 hsa-mir-130b | ACTL6A   | 0.337652212 mirna_pc |
| 25202 hsa-mir-130b | C12orf48 | 0.480370596 mirna_pc |
| 25203 hsa-mir-130b | HNRNPL   | 0.371684127 mirna_pc |
| 25204 hsa-mir-130b | SMC4     | 0.307236672 mirna_pc |
| 25205 hsa-mir-130b | PKMYT1   | 0.303921856 mirna_pc |
| 25206 hsa-mir-130b | ZWINT    | 0.43602304 mirna_pc  |
| 25207 hsa-mir-130b | TUBA1B   | 0.402136856 mirna_pc |
| 25208 hsa-mir-130b | HELLS    | 0.303932001 mirna_pc |
| 25209 hsa-mir-130b | UBE2S    | 0.326362683 mirna_pc |
| 25210 hsa-mir-130b | NCAPD2   | 0.340742301 mirna_pc |
| 25211 hsa-mir-130b | HNRNPC   | 0.321644018 mirna_pc |
| 25212 hsa-mir-130b | ILF2     | 0.413239146 mirna_pc |
| 25213 hsa-mir-130b | TCF3     | 0.358345287 mirna_pc |
| 25214 hsa-mir-130b | MCM5     | 0.339359995 mirna_pc |
| 25215 hsa-mir-130b | TYMS     | 0.317012247 mirna_pc |
| 25216 hsa-mir-130b | RFWD3    | 0.302534134 mirna_pc |
| 25217 hsa-mir-130b | MCM6     | 0.361737975 mirna_pc |

|       |              |          |             |          |
|-------|--------------|----------|-------------|----------|
| 25218 | hsa-mir-130b | RNASEH2A | 0.320644422 | mirna_pc |
| 25219 | hsa-mir-130b | EPRI     | 0.454283077 | mirna_pc |
| 25220 | hsa-mir-130b | H2AFX    | 0.363978146 | mirna_pc |
| 25221 | hsa-mir-130b | SFRS2    | 0.322885769 | mirna_pc |
| 25222 | hsa-mir-130b | UCK2     | 0.46385603  | mirna_pc |
| 25223 | hsa-mir-130b | THOC4    | 0.363748413 | mirna_pc |
| 25224 | hsa-mir-130b | NFKBIL2  | 0.319220077 | mirna_pc |
| 25225 | hsa-mir-130b | C15orf42 | 0.397555987 | mirna_pc |
| 25226 | hsa-mir-130b | FAM60A   | 0.33049733  | mirna_pc |
| 25227 | hsa-mir-130b | FAM64A   | 0.372877087 | mirna_pc |
| 25228 | hsa-mir-130b | RANBP1   | 0.449456684 | mirna_pc |
| 25229 | hsa-mir-130b | E2F1     | 0.373999211 | mirna_pc |
| 25230 | hsa-mir-130b | SNRPG    | 0.320296901 | mirna_pc |
| 25231 | hsa-mir-130b | MCM3     | 0.307701309 | mirna_pc |
| 25232 | hsa-mir-130b | SNRPA    | 0.401102023 | mirna_pc |
| 25233 | hsa-mir-130b | FUS      | 0.301380759 | mirna_pc |
| 25234 | hsa-mir-130b | U2AF2    | 0.339041925 | mirna_pc |
| 25235 | hsa-mir-130b | CHAF1A   | 0.320143994 | mirna_pc |
| 25236 | hsa-mir-130b | CENPO    | 0.577599263 | mirna_pc |
| 25237 | hsa-mir-130b | C19orf48 | 0.300185411 | mirna_pc |
| 25238 | hsa-mir-130b | NUDT1    | 0.40588839  | mirna_pc |
| 25239 | hsa-mir-130b | HMGB2    | 0.410132074 | mirna_pc |
| 25240 | hsa-mir-130b | GINS2    | 0.398383224 | mirna_pc |
| 25241 | hsa-mir-130b | DNA2     | 0.323527753 | mirna_pc |
| 25242 | hsa-mir-130b | SNRPD1   | 0.307669364 | mirna_pc |
| 25243 | hsa-mir-130b | DTYMK    | 0.397464967 | mirna_pc |
| 25244 | hsa-mir-130b | E2F7     | 0.335242644 | mirna_pc |
| 25245 | hsa-mir-130b | MLF1IP   | 0.363520236 | mirna_pc |
| 25246 | hsa-mir-130b | HSPE1    | 0.301274619 | mirna_pc |
| 25247 | hsa-mir-130b | C16orf75 | 0.434635492 | mirna_pc |
| 25248 | hsa-mir-130b | CAD      | 0.432523288 | mirna_pc |
| 25249 | hsa-mir-130b | CCDC99   | 0.310323429 | mirna_pc |
| 25250 | hsa-mir-130b | CDK2     | 0.358987871 | mirna_pc |
| 25251 | hsa-mir-130b | CDK4     | 0.40290826  | mirna_pc |
| 25252 | hsa-mir-130b | TMEM108  | 0.360019515 | mirna_pc |
| 25253 | hsa-mir-130b | HNRNPR   | 0.343155259 | mirna_pc |
| 25254 | hsa-mir-130b | CENPH    | 0.335816965 | mirna_pc |
| 25255 | hsa-mir-130b | MSH2     | 0.421842241 | mirna_pc |
| 25256 | hsa-mir-130b | SF3B3    | 0.415554027 | mirna_pc |
| 25257 | hsa-mir-130b | CDC7     | 0.37742739  | mirna_pc |
| 25258 | hsa-mir-130b | YDJC     | 0.35858523  | mirna_pc |
| 25259 | hsa-mir-130b | RFC4     | 0.455152255 | mirna_pc |
| 25260 | hsa-mir-130b | FBX05    | 0.393360033 | mirna_pc |
| 25261 | hsa-mir-130b | FIGNL1   | 0.320894347 | mirna_pc |
| 25262 | hsa-mir-130b | DDX11    | 0.365387551 | mirna_pc |
| 25263 | hsa-mir-130b | CDC25A   | 0.353604289 | mirna_pc |
| 25264 | hsa-mir-130b | RAD54B   | 0.320898618 | mirna_pc |
| 25265 | hsa-mir-130b | OTX1     | 0.365198263 | mirna_pc |
| 25266 | hsa-mir-130b | H2AFZ    | 0.46755455  | mirna_pc |
| 25267 | hsa-mir-130b | DDX12    | 0.345430169 | mirna_pc |
| 25268 | hsa-mir-130b | MCM8     | 0.369337873 | mirna_pc |
| 25269 | hsa-mir-130b | CPSF3    | 0.418009785 | mirna_pc |
| 25270 | hsa-mir-130b | SNRPE    | 0.379006597 | mirna_pc |
| 25271 | hsa-mir-130b | PPM1G    | 0.415500683 | mirna_pc |



|                    |              |                      |
|--------------------|--------------|----------------------|
| 25272 hsa-mir-130b | MARCKSL1     | 0.315345311 mirna_pc |
| 25273 hsa-mir-130b | TFAP4        | 0.365983293 mirna_pc |
| 25274 hsa-mir-130b | DAZAP1       | 0.402714962 mirna_pc |
| 25275 hsa-mir-130b | CBX8         | 0.362261876 mirna_pc |
| 25276 hsa-mir-130b | TMEM201      | 0.337445588 mirna_pc |
| 25277 hsa-mir-130b | PAFAH1B3     | 0.308600126 mirna_pc |
| 25278 hsa-mir-130b | DCTPP1       | 0.438897443 mirna_pc |
| 25279 hsa-mir-130b | PSRC1        | 0.53149512 mirna_pc  |
| 25280 hsa-mir-130b | DGUOK        | 0.31533492 mirna_pc  |
| 25281 hsa-mir-130b | FBL          | 0.348297344 mirna_pc |
| 25282 hsa-mir-130b | HIST1H1E     | 0.318169467 mirna_pc |
| 25283 hsa-mir-130b | HNRNPM       | 0.332972272 mirna_pc |
| 25284 hsa-mir-130b | TMPO         | 0.440505063 mirna_pc |
| 25285 hsa-mir-130b | POLR2H       | 0.319009346 mirna_pc |
| 25286 hsa-mir-130b | SSBP3        | 0.368085348 mirna_pc |
| 25287 hsa-mir-130b | LSG1         | 0.354546311 mirna_pc |
| 25288 hsa-mir-130b | GABPB1       | 0.372769915 mirna_pc |
| 25289 hsa-mir-130b | PPIH         | 0.35855049 mirna_pc  |
| 25290 hsa-mir-130b | PPAT         | 0.342601351 mirna_pc |
| 25291 hsa-mir-130b | DHX9         | 0.337479857 mirna_pc |
| 25292 hsa-mir-130b | CCDC138      | 0.315127929 mirna_pc |
| 25293 hsa-mir-130b | LOC100128191 | 0.443592086 mirna_pc |
| 25294 hsa-mir-130b | ETV4         | 0.423609972 mirna_pc |
| 25295 hsa-mir-130b | SMYD5        | 0.33738372 mirna_pc  |
| 25296 hsa-mir-130b | POLA2        | 0.341431682 mirna_pc |
| 25297 hsa-mir-130b | SFRS1        | 0.355961858 mirna_pc |
| 25298 hsa-mir-130b | SNRPA1       | 0.314701419 mirna_pc |
| 25299 hsa-mir-130b | SKP2         | 0.348311805 mirna_pc |
| 25300 hsa-mir-130b | TIPIN        | 0.317153253 mirna_pc |
| 25301 hsa-mir-130b | SMARCD1      | 0.312744294 mirna_pc |
| 25302 hsa-mir-130b | ATXN2L       | 0.354940085 mirna_pc |
| 25303 hsa-mir-130b | C4orf46      | 0.442119463 mirna_pc |
| 25304 hsa-mir-130b | ECE2         | 0.339678729 mirna_pc |
| 25305 hsa-mir-130b | GPN1         | 0.341775411 mirna_pc |
| 25306 hsa-mir-130b | RFC5         | 0.382603194 mirna_pc |
| 25307 hsa-mir-130b | MAZ          | 0.431759423 mirna_pc |
| 25308 hsa-mir-130b | SSRP1        | 0.349989476 mirna_pc |
| 25309 hsa-mir-130b | POLR2D       | 0.408104211 mirna_pc |
| 25310 hsa-mir-130b | FTSJ2        | 0.302410878 mirna_pc |
| 25311 hsa-mir-130b | SNRPD3       | 0.411379157 mirna_pc |
| 25312 hsa-mir-130b | KHDRBS1      | 0.388267816 mirna_pc |
| 25313 hsa-mir-130b | SLC5A6       | 0.371594155 mirna_pc |
| 25314 hsa-mir-130b | SPAST        | 0.425092003 mirna_pc |
| 25315 hsa-mir-130b | LOC92659     | 0.333084981 mirna_pc |
| 25316 hsa-mir-130b | MTL 5.00     | 0.528990144 mirna_pc |
| 25317 hsa-mir-130b | PARP1        | 0.344838403 mirna_pc |
| 25318 hsa-mir-130b | CCT7         | 0.304025573 mirna_pc |
| 25319 hsa-mir-130b | C4orf21      | 0.303763391 mirna_pc |
| 25320 hsa-mir-130b | TMEM194A     | 0.360567271 mirna_pc |
| 25321 hsa-mir-130b | SNRNP40      | 0.310663257 mirna_pc |
| 25322 hsa-mir-130b | SLC39A10     | 0.324812389 mirna_pc |
| 25323 hsa-mir-130b | NEDD1        | 0.337427093 mirna_pc |
| 25324 hsa-mir-130b | WRAP53       | 0.306132464 mirna_pc |
| 25325 hsa-mir-130b | NASP         | 0.359308107 mirna_pc |

|       |              |          |             |          |
|-------|--------------|----------|-------------|----------|
| 25326 | hsa-mir-130b | NONO     | 0.38399858  | mirna_pc |
| 25327 | hsa-mir-130b | CCDC86   | 0.349517853 | mirna_pc |
| 25328 | hsa-mir-130b | BCL2     | 0.380484336 | mirna_pc |
| 25329 | hsa-mir-130b | OBFC2B   | 0.349266946 | mirna_pc |
| 25330 | hsa-mir-130b | PTMA     | 0.352169922 | mirna_pc |
| 25331 | hsa-mir-130b | USP39    | 0.434905608 | mirna_pc |
| 25332 | hsa-mir-130b | WDR76    | 0.314691219 | mirna_pc |
| 25333 | hsa-mir-130b | LSM 4.00 | 0.30779779  | mirna_pc |
| 25334 | hsa-mir-130b | C11orf84 | 0.422606534 | mirna_pc |
| 25335 | hsa-mir-130b | NCBP2    | 0.313029041 | mirna_pc |
| 25336 | hsa-mir-130b | SUV39H2  | 0.367732899 | mirna_pc |
| 25337 | hsa-mir-130b | LSM 2.00 | 0.391302275 | mirna_pc |
| 25338 | hsa-mir-130b | R3HDM1   | 0.305155267 | mirna_pc |
| 25339 | hsa-mir-130b | RIBC2    | 0.310211767 | mirna_pc |
| 25340 | hsa-mir-130b | HNRNPD   | 0.419681773 | mirna_pc |
| 25341 | hsa-mir-130b | DPY30    | 0.334061226 | mirna_pc |
| 25342 | hsa-mir-130b | MTHFD2   | 0.324227588 | mirna_pc |
| 25343 | hsa-mir-130b | DPH2     | 0.30751278  | mirna_pc |
| 25344 | hsa-mir-130b | SFRS3    | 0.307259259 | mirna_pc |
| 25345 | hsa-mir-130b | SHOX2    | 0.379074229 | mirna_pc |
| 25346 | hsa-mir-130b | H1FX     | 0.339607166 | mirna_pc |
| 25347 | hsa-mir-130b | CCT4     | 0.33270616  | mirna_pc |
| 25348 | hsa-mir-130b | ELAVL1   | 0.407718831 | mirna_pc |
| 25349 | hsa-mir-130b | USP22    | 0.323200224 | mirna_pc |
| 25350 | hsa-mir-130b | PSMC3IP  | 0.342121773 | mirna_pc |
| 25351 | hsa-mir-130b | PAK1IP1  | 0.301924701 | mirna_pc |
| 25352 | hsa-mir-130b | PES 1.00 | 0.30363201  | mirna_pc |
| 25353 | hsa-mir-130b | PMAIP1   | 0.340239103 | mirna_pc |
| 25354 | hsa-mir-130b | NT5DC2   | 0.341530871 | mirna_pc |
| 25355 | hsa-mir-130b | EHMT2    | 0.404974993 | mirna_pc |
| 25356 | hsa-mir-130b | DEK      | 0.304349391 | mirna_pc |
| 25357 | hsa-mir-130b | SFRS9    | 0.338937663 | mirna_pc |
| 25358 | hsa-mir-130b | PASK     | 0.316209118 | mirna_pc |
| 25359 | hsa-mir-130b | HEATR2   | 0.412619448 | mirna_pc |
| 25360 | hsa-mir-130b | LSM 6.00 | 0.37931098  | mirna_pc |
| 25361 | hsa-mir-130b | PRAME    | 0.457871331 | mirna_pc |
| 25362 | hsa-mir-130b | SUV39H1  | 0.386114051 | mirna_pc |
| 25363 | hsa-mir-130b | IPO9     | 0.31235999  | mirna_pc |
| 25364 | hsa-mir-130b | SART3    | 0.353200119 | mirna_pc |
| 25365 | hsa-mir-130b | TRA2B    | 0.418409833 | mirna_pc |
| 25366 | hsa-mir-130b | RSRC1    | 0.343534591 | mirna_pc |
| 25367 | hsa-mir-130b | GAR1     | 0.360188013 | mirna_pc |
| 25368 | hsa-mir-130b | C15orf23 | 0.372111058 | mirna_pc |
| 25369 | hsa-mir-130b | CDRT4    | 0.382728216 | mirna_pc |
| 25370 | hsa-mir-130b | C3orf21  | 0.363829197 | mirna_pc |
| 25371 | hsa-mir-130b | DIABLO   | 0.303065759 | mirna_pc |
| 25372 | hsa-mir-130b | IGF2BP2  | 0.347887269 | mirna_pc |
| 25373 | hsa-mir-130b | WHSC1    | 0.322952167 | mirna_pc |
| 25374 | hsa-mir-130b | ITGB3BP  | 0.374867936 | mirna_pc |
| 25375 | hsa-mir-130b | ENOPH1   | 0.315719553 | mirna_pc |
| 25376 | hsa-mir-130b | PLEKHG4  | 0.343875674 | mirna_pc |
| 25377 | hsa-mir-130b | SFPQ     | 0.406610318 | mirna_pc |
| 25378 | hsa-mir-130b | CD83     | 0.344662608 | mirna_pc |
| 25379 | hsa-mir-130b | RCOR2    | 0.469920216 | mirna_pc |

|                    |           |                      |
|--------------------|-----------|----------------------|
| 25380 hsa-mir-130b | FAM125B   | 0.354019668 mirna_pc |
| 25381 hsa-mir-130b | AS3MT     | 0.355302627 mirna_pc |
| 25382 hsa-mir-130b | CADM1     | 0.390014385 mirna_pc |
| 25383 hsa-mir-130b | POLA1     | 0.305034452 mirna_pc |
| 25384 hsa-mir-130b | HDAC2     | 0.336529 mirna_pc    |
| 25385 hsa-mir-130b | GMNN      | 0.305059239 mirna_pc |
| 25386 hsa-mir-130b | POGK      | 0.307297022 mirna_pc |
| 25387 hsa-mir-130b | SALL2     | 0.318813004 mirna_pc |
| 25388 hsa-mir-130b | GEMIN6    | 0.332807461 mirna_pc |
| 25389 hsa-mir-130b | MSH6      | 0.465311972 mirna_pc |
| 25390 hsa-mir-130b | SOX4      | 0.33296662 mirna_pc  |
| 25391 hsa-mir-130b | LEF1      | 0.42720653 mirna_pc  |
| 25392 hsa-mir-130b | FAM161A   | 0.318881289 mirna_pc |
| 25393 hsa-mir-130b | HNRNPA1   | 0.30033862 mirna_pc  |
| 25394 hsa-mir-130b | KREMEN2   | 0.386155321 mirna_pc |
| 25395 hsa-mir-130b | NUDT3     | 0.377241 mirna_pc    |
| 25396 hsa-mir-130b | MEX3A     | 0.559193449 mirna_pc |
| 25397 hsa-mir-130b | MOGS      | 0.325581921 mirna_pc |
| 25398 hsa-mir-130b | ERAL1     | 0.314631594 mirna_pc |
| 25399 hsa-mir-130b | IRAK1BP1  | 0.350144065 mirna_pc |
| 25400 hsa-mir-130b | TAF5      | 0.434061499 mirna_pc |
| 25401 hsa-mir-130b | TRIM28    | 0.302930722 mirna_pc |
| 25402 hsa-mir-130b | TIFA      | 0.374839659 mirna_pc |
| 25403 hsa-mir-130b | ATXN7L3B  | 0.319188602 mirna_pc |
| 25404 hsa-mir-130b | APEX1     | 0.344038987 mirna_pc |
| 25405 hsa-mir-130b | UNC119B   | 0.402792079 mirna_pc |
| 25406 hsa-mir-130b | HNRNPA1L2 | 0.363371548 mirna_pc |
| 25407 hsa-mir-130b | CBX1      | 0.354145181 mirna_pc |
| 25408 hsa-mir-130b | EMILIN3   | 0.392597575 mirna_pc |
| 25409 hsa-mir-130b | ZBTB12    | 0.378957172 mirna_pc |
| 25410 hsa-mir-130b | MCTP2     | 0.33767204 mirna_pc  |
| 25411 hsa-mir-130b | TGIF2     | 0.435395176 mirna_pc |
| 25412 hsa-mir-130b | ERI3      | 0.327756391 mirna_pc |
| 25413 hsa-mir-130b | RCN2      | 0.394994438 mirna_pc |
| 25414 hsa-mir-130b | CIB2      | 0.368556729 mirna_pc |
| 25415 hsa-mir-130b | TARBP2    | 0.314360321 mirna_pc |
| 25416 hsa-mir-130b | NOL10     | 0.343467388 mirna_pc |
| 25417 hsa-mir-130b | SF3A3     | 0.339641993 mirna_pc |
| 25418 hsa-mir-130b | POLE      | 0.446400567 mirna_pc |
| 25419 hsa-mir-130b | ZKSCAN2   | 0.333130799 mirna_pc |
| 25420 hsa-mir-130b | MUTYH     | 0.352977496 mirna_pc |
| 25421 hsa-mir-130b | ADSL      | 0.355491557 mirna_pc |
| 25422 hsa-mir-130b | RBM14     | 0.318930355 mirna_pc |
| 25423 hsa-mir-130b | EXOSC9    | 0.350251269 mirna_pc |
| 25424 hsa-mir-130b | FOXRED2   | 0.340859913 mirna_pc |
| 25425 hsa-mir-130b | UNG       | 0.34917657 mirna_pc  |
| 25426 hsa-mir-130b | RBMX      | 0.399742504 mirna_pc |
| 25427 hsa-mir-130b | TSEN15    | 0.318767576 mirna_pc |
| 25428 hsa-mir-130b | CDK16     | 0.36568868 mirna_pc  |
| 25429 hsa-mir-130b | ALKBH2    | 0.380630201 mirna_pc |
| 25430 hsa-mir-130b | SOCS7     | 0.300301017 mirna_pc |
| 25431 hsa-mir-130b | CTCF      | 0.434394638 mirna_pc |
| 25432 hsa-mir-130b | RPL39L    | 0.418750348 mirna_pc |
| 25433 hsa-mir-130b | PDIA6     | 0.304635843 mirna_pc |

|                    |          |                      |
|--------------------|----------|----------------------|
| 25434 hsa-mir-130b | GPN3     | 0.348500206 mirna_pc |
| 25435 hsa-mir-130b | EPHB4    | 0.356664749 mirna_pc |
| 25436 hsa-mir-130b | MRPL37   | 0.315510775 mirna_pc |
| 25437 hsa-mir-130b | CCDC23   | 0.31938738 mirna_pc  |
| 25438 hsa-mir-130b | IGSF9    | 0.401184091 mirna_pc |
| 25439 hsa-mir-130b | FIP1L1   | 0.330473766 mirna_pc |
| 25440 hsa-mir-130b | CIT      | 0.343741534 mirna_pc |
| 25441 hsa-mir-130b | KDM2B    | 0.395958298 mirna_pc |
| 25442 hsa-mir-130b | GTF3C2   | 0.37503772 mirna_pc  |
| 25443 hsa-mir-130b | MAGEF1   | 0.420751351 mirna_pc |
| 25444 hsa-mir-130b | VWA2     | 0.324834158 mirna_pc |
| 25445 hsa-mir-130b | FAM136A  | 0.369734985 mirna_pc |
| 25446 hsa-mir-130b | NKD2     | 0.306435783 mirna_pc |
| 25447 hsa-mir-130b | SUPT3H   | 0.334342605 mirna_pc |
| 25448 hsa-mir-130b | SMARCB1  | 0.487929886 mirna_pc |
| 25449 hsa-mir-130b | MYB      | 0.382336287 mirna_pc |
| 25450 hsa-mir-130b | ZNF639   | 0.375631512 mirna_pc |
| 25451 hsa-mir-130b | ITPRIPL1 | 0.478360553 mirna_pc |
| 25452 hsa-mir-130b | UBXN7    | 0.317949878 mirna_pc |
| 25453 hsa-mir-130b | ANKRD6   | 0.343838862 mirna_pc |
| 25454 hsa-mir-130b | STRA13   | 0.464051654 mirna_pc |
| 25455 hsa-mir-130b | DVL3     | 0.325019849 mirna_pc |
| 25456 hsa-mir-130b | BCL7A    | 0.44384331 mirna_pc  |
| 25457 hsa-mir-130b | DVL2     | 0.307018564 mirna_pc |
| 25458 hsa-mir-130b | TRPA1    | 0.458738528 mirna_pc |
| 25459 hsa-mir-130b | ARHGAP19 | 0.354030227 mirna_pc |
| 25460 hsa-mir-130b | ZNF286A  | 0.421909622 mirna_pc |
| 25461 hsa-mir-130b | WDR77    | 0.370373954 mirna_pc |
| 25462 hsa-mir-130b | MRPL21   | 0.455287325 mirna_pc |
| 25463 hsa-mir-130b | NLE1     | 0.307435559 mirna_pc |
| 25464 hsa-mir-130b | DMRTA2   | 0.363385774 mirna_pc |
| 25465 hsa-mir-130b | CHST10   | 0.324488816 mirna_pc |
| 25466 hsa-mir-130b | CUEDC2   | 0.315405544 mirna_pc |
| 25467 hsa-mir-130b | PSPH     | 0.322622556 mirna_pc |
| 25468 hsa-mir-130b | PPP1CC   | 0.405383267 mirna_pc |
| 25469 hsa-mir-130b | TMEM106C | 0.332614532 mirna_pc |
| 25470 hsa-mir-130b | TAF4B    | 0.355944637 mirna_pc |
| 25471 hsa-mir-130b | TRMT61B  | 0.301453945 mirna_pc |
| 25472 hsa-mir-130b | SEMA4F   | 0.407262493 mirna_pc |
| 25473 hsa-mir-130b | ZNF286B  | 0.418725933 mirna_pc |
| 25474 hsa-mir-130b | PDF      | 0.320937899 mirna_pc |
| 25475 hsa-mir-130b | Clorf109 | 0.369981897 mirna_pc |
| 25476 hsa-mir-130b | PIGX     | 0.301156411 mirna_pc |
| 25477 hsa-mir-130b | MTA1     | 0.353263356 mirna_pc |
| 25478 hsa-mir-130b | ATP6V1E2 | 0.344141299 mirna_pc |
| 25479 hsa-mir-130b | MAPKAPK5 | 0.329663069 mirna_pc |
| 25480 hsa-mir-130b | GPR3     | 0.388662712 mirna_pc |
| 25481 hsa-mir-130b | E2F6     | 0.388891562 mirna_pc |
| 25482 hsa-mir-130b | DRG1     | 0.334312987 mirna_pc |
| 25483 hsa-mir-130b | B4GALT3  | 0.303240445 mirna_pc |
| 25484 hsa-mir-130b | SFRS13A  | 0.312751853 mirna_pc |
| 25485 hsa-mir-130b | SCLY     | 0.498963459 mirna_pc |
| 25486 hsa-mir-130b | GPR125   | 0.352647532 mirna_pc |
| 25487 hsa-mir-130b | NUP35    | 0.346962606 mirna_pc |

|       |              |           |                   |          |
|-------|--------------|-----------|-------------------|----------|
| 25488 | hsa-mir-130b | ALG10     | 0.383088164       | mirna_pc |
| 25489 | hsa-mir-130b | SLC4A1AP  | 0.317706682       | mirna_pc |
| 25490 | hsa-mir-130b | TTC27     | 0.344998187       | mirna_pc |
| 25491 | hsa-mir-130b | DHRS13    | 0.376459925       | mirna_pc |
| 25492 | hsa-mir-130b | KRTCAP3   | 0.345221883       | mirna_pc |
| 25493 | hsa-mir-130b | EWSR1     | 0.318232955       | mirna_pc |
| 25494 | hsa-mir-130b | DHX57     | 0.415173449       | mirna_pc |
| 25495 | hsa-mir-130b | ALX3      | 0.494397531       | mirna_pc |
| 25496 | hsa-mir-130b | AAAS      | 0.393232526       | mirna_pc |
| 25497 | hsa-mir-130b | CHST14    | 0.300534433       | mirna_pc |
| 25498 | hsa-mir-130b | ACVR2B    | 0.358624667       | mirna_pc |
| 25499 | hsa-mir-130b | C2orf79   | 0.304970321       | mirna_pc |
| 25500 | hsa-mir-130b | LIG3      | 0.301131284       | mirna_pc |
| 25501 | hsa-mir-130b | MRPS26    | 0.306866285       | mirna_pc |
| 25502 | hsa-mir-130b | MRPL30    | 0.344269951       | mirna_pc |
| 25503 | hsa-mir-130b | PYCR1     | 0.363450456       | mirna_pc |
| 25504 | hsa-mir-130b | SFRS7     | 0.437610118       | mirna_pc |
| 25505 | hsa-mir-130b | C18orf10  | 0.333861902       | mirna_pc |
| 25506 | hsa-mir-130b | TRMT2A    | 0.346714392       | mirna_pc |
| 25507 | hsa-mir-130b | PCBP2     | 0.346277889       | mirna_pc |
| 25508 | hsa-mir-130b | PFAS      | 0.321123999       | mirna_pc |
| 25509 | hsa-mir-130b | C10orf35  | 0.340493815       | mirna_pc |
| 25510 | hsa-mir-130b | LRRC45    | 0.315300028       | mirna_pc |
| 25511 | hsa-mir-130b | BLMH      | 0.307887933       | mirna_pc |
| 25512 | hsa-mir-130b | RBM10     | 0.308660211       | mirna_pc |
| 25513 | hsa-mir-130b | ORAOV1    | 0.308116411       | mirna_pc |
| 25514 | hsa-mir-130b | EIF2B5    | 0.303501254       | mirna_pc |
| 25515 | hsa-mir-130b | NIPSNAP1  | 0.385458541       | mirna_pc |
| 25516 | hsa-mir-130b | C2orf68   | 0.300853182       | mirna_pc |
| 25517 | hsa-mir-130b | ARHGEF19  | 0.363360164       | mirna_pc |
| 25518 | hsa-mir-130b | C17orf75  | 0.371213491       | mirna_pc |
| 25519 | hsa-mir-130b | CCND1     | 0.366094943       | mirna_pc |
| 25520 | hsa-mir-130b | MYST1     | 0.335276786       | mirna_pc |
| 25521 | hsa-mir-130b | ZNF771    | 0.454096422       | mirna_pc |
| 25522 | hsa-mir-130b |           | 3-Sep 0.303953973 | mirna_pc |
| 25523 | hsa-mir-130b | TCTN2     | 0.41825305        | mirna_pc |
| 25524 | hsa-mir-130b | MTP 18.00 | 0.328712186       | mirna_pc |
| 25525 | hsa-mir-130b | POLR2C    | 0.338352046       | mirna_pc |
| 25526 | hsa-mir-130b | C12orf45  | 0.319527616       | mirna_pc |
| 25527 | hsa-mir-130b | C2orf44   | 0.408326269       | mirna_pc |
| 25528 | hsa-mir-130b | SEPHS1    | 0.475382979       | mirna_pc |
| 25529 | hsa-mir-130b | SHISA2    | 0.402978229       | mirna_pc |
| 25530 | hsa-mir-130b | CBX5      | 0.342055479       | mirna_pc |
| 25531 | hsa-mir-130b | RPS19BP1  | 0.375854442       | mirna_pc |
| 25532 | hsa-mir-130b | AGBL5     | 0.529915323       | mirna_pc |
| 25533 | hsa-mir-130b | VASH2     | 0.361658771       | mirna_pc |
| 25534 | hsa-mir-130b | MYL6B     | 0.390110919       | mirna_pc |
| 25535 | hsa-mir-130b | CD200     | 0.40013384        | mirna_pc |
| 25536 | hsa-mir-130b | GPX7      | 0.301593566       | mirna_pc |
| 25537 | hsa-mir-130b | NME4      | 0.304607336       | mirna_pc |
| 25538 | hsa-mir-130b | LYRM4     | 0.344857758       | mirna_pc |
| 25539 | hsa-mir-130b | BCL11A    | 0.336390599       | mirna_pc |
| 25540 | hsa-mir-130b | USP21     | 0.42740595        | mirna_pc |
| 25541 | hsa-mir-130b | ALMS1     | 0.307081245       | mirna_pc |

|                    |          |                      |
|--------------------|----------|----------------------|
| 25542 hsa-mir-130b | DCLRE1A  | 0.324157568 mirna_pc |
| 25543 hsa-mir-130b | ZNF74    | 0.408188526 mirna_pc |
| 25544 hsa-mir-130b | ANP32A   | 0.507327729 mirna_pc |
| 25545 hsa-mir-130b | CPT1A    | 0.365446922 mirna_pc |
| 25546 hsa-mir-130b | ZMYM4    | 0.343808677 mirna_pc |
| 25547 hsa-mir-130b | TCF7L1   | 0.334056461 mirna_pc |
| 25548 hsa-mir-130b | C17orf81 | 0.315914393 mirna_pc |
| 25549 hsa-mir-130b | HYLS1    | 0.301523996 mirna_pc |
| 25550 hsa-mir-130b | HIC2     | 0.313196144 mirna_pc |
| 25551 hsa-mir-130b | SDF2L1   | 0.328902947 mirna_pc |
| 25552 hsa-mir-130b | NAP1L1   | 0.338505217 mirna_pc |
| 25553 hsa-mir-130b | CNIH2    | 0.327740831 mirna_pc |
| 25554 hsa-mir-130b | BUD13    | 0.396969804 mirna_pc |
| 25555 hsa-mir-130b | PTPLAD1  | 0.31943048 mirna_pc  |
| 25556 hsa-mir-130b | MORN2    | 0.345105357 mirna_pc |
| 25557 hsa-mir-130b | CCNJ     | 0.318431291 mirna_pc |
| 25558 hsa-mir-130b | MYCN     | 0.43973196 mirna_pc  |
| 25559 hsa-mir-130b | C12orf24 | 0.305083013 mirna_pc |
| 25560 hsa-mir-130b | SBK1     | 0.618148652 mirna_pc |
| 25561 hsa-mir-130b | PABPC4L  | 0.411847533 mirna_pc |
| 25562 hsa-mir-130b | SF3A1    | 0.335098474 mirna_pc |
| 25563 hsa-mir-130b | PMF1     | 0.350307734 mirna_pc |
| 25564 hsa-mir-130b | FAM171A1 | 0.313824254 mirna_pc |
| 25565 hsa-mir-130b | USP13    | 0.437951912 mirna_pc |
| 25566 hsa-mir-130b | GALNT14  | 0.317175689 mirna_pc |
| 25567 hsa-mir-130b | CD69     | 0.395053279 mirna_pc |
| 25568 hsa-mir-130b | SLC25A33 | 0.326548839 mirna_pc |
| 25569 hsa-mir-130b | MSI1     | 0.473653974 mirna_pc |
| 25570 hsa-mir-130b | CLPB     | 0.336650593 mirna_pc |
| 25571 hsa-mir-130b | TMEM18   | 0.31951512 mirna_pc  |
| 25572 hsa-mir-130b | TRO      | 0.324839837 mirna_pc |
| 25573 hsa-mir-130b | DDX51    | 0.312595126 mirna_pc |
| 25574 hsa-mir-130b | ZNF232   | 0.484188862 mirna_pc |
| 25575 hsa-mir-130b | SENP2    | 0.324962516 mirna_pc |
| 25576 hsa-mir-130b | ZBTB39   | 0.477116954 mirna_pc |
| 25577 hsa-mir-130b | SNRNP27  | 0.302567481 mirna_pc |
| 25578 hsa-mir-130b | CECR5    | 0.305616159 mirna_pc |
| 25579 hsa-mir-130b | DTNB     | 0.308678191 mirna_pc |
| 25580 hsa-mir-130b | FAM169A  | 0.327403312 mirna_pc |
| 25581 hsa-mir-130b | VPS54    | 0.462745951 mirna_pc |
| 25582 hsa-mir-130b | RAC3     | 0.300955455 mirna_pc |
| 25583 hsa-mir-130b | RBBP4    | 0.371984181 mirna_pc |
| 25584 hsa-mir-130b | RASL11B  | 0.303614915 mirna_pc |
| 25585 hsa-mir-130b | C2orf3   | 0.372733585 mirna_pc |
| 25586 hsa-mir-130b | ZNF22    | 0.302871874 mirna_pc |
| 25587 hsa-mir-130b | CCDC157  | 0.335458614 mirna_pc |
| 25588 hsa-mir-130b | PDGFA    | 0.342496452 mirna_pc |
| 25589 hsa-mir-130b | SRRD     | 0.328150455 mirna_pc |
| 25590 hsa-mir-130b | UBE2L3   | 0.303885258 mirna_pc |
| 25591 hsa-mir-130b | SCML2    | 0.47995366 mirna_pc  |
| 25592 hsa-mir-130b | HSF2     | 0.324127158 mirna_pc |
| 25593 hsa-mir-130b | ZCCHC3   | 0.328995582 mirna_pc |
| 25594 hsa-mir-130b | ETV5     | 0.537101868 mirna_pc |
| 25595 hsa-mir-130b | PGAP1    | 0.304670063 mirna_pc |

|                      |          |                      |
|----------------------|----------|----------------------|
| 25596 hsa-mir-130b   | DACT2    | 0.541278585 mirna_pc |
| 25597 hsa-mir-130b   | EXOSC6   | 0.301187287 mirna_pc |
| 25598 hsa-mir-130b   | AADAT    | 0.42907272 mirna_pc  |
| 25599 hsa-mir-130b   | IGHMBP2  | 0.448871065 mirna_pc |
| 25600 hsa-mir-130b   | ACP1     | 0.353196736 mirna_pc |
| 25601 hsa-mir-130b   | C2orf43  | 0.320471592 mirna_pc |
| 25602 hsa-mir-130b   | ACTR3B   | 0.307225876 mirna_pc |
| 25603 hsa-mir-130b   | ZNF48    | 0.373953656 mirna_pc |
| 25604 hsa-mir-130b   | TXNL4A   | 0.330783952 mirna_pc |
| 25605 hsa-mir-130b   | DNAL4    | 0.329767595 mirna_pc |
| 25606 hsa-mir-130b   | SPRED2   | 0.381819433 mirna_pc |
| 25607 hsa-mir-130b   | SERF1A   | 0.355869177 mirna_pc |
| 25608 hsa-mir-130b   | CCDC117  | 0.341140236 mirna_pc |
| 25609 hsa-mir-130b   | PREB     | 0.466702915 mirna_pc |
| 25610 hsa-mir-130b   | B4GALNT4 | 0.415239335 mirna_pc |
| 25611 hsa-mir-130b   | PRMT6    | 0.394609886 mirna_pc |
| 25612 hsa-mir-130b   | C2orf28  | 0.306242995 mirna_pc |
| 25613 hsa-mir-130b   | H2AFY2   | 0.345334767 mirna_pc |
| 25614 hsa-mir-130b   | HIRIP3   | 0.327687385 mirna_pc |
| 25615 hsa-mir-130b   | BOD1     | 0.354982295 mirna_pc |
| 25616 hsa-mir-130b   | DYNC2LI1 | 0.305418786 mirna_pc |
| 25617 hsa-mir-130b   | SCHIP1   | 0.329883187 mirna_pc |
| 25618 hsa-mir-130b   | VPS37D   | 0.310896229 mirna_pc |
| 25619 hsa-mir-130b   | SV2A     | 0.31497941 mirna_pc  |
| 25620 hsa-mir-130b   | NT5M     | 0.329107325 mirna_pc |
| 25621 hsa-mir-130b   | THOC5    | 0.360332005 mirna_pc |
| 25622 hsa-mir-130b   | EFNB3    | 0.324737324 mirna_pc |
| 25623 hsa-mir-130b   | TEX261   | 0.308890872 mirna_pc |
| 25624 hsa-mir-130b   | CENPV    | 0.361065223 mirna_pc |
| 25625 hsa-mir-130b   | DNMT3A   | 0.57933621 mirna_pc  |
| 25626 hsa-mir-130b   | ZNF821   | 0.307115452 mirna_pc |
| 25627 hsa-mir-130b   | TET1     | 0.398239354 mirna_pc |
| 25628 hsa-mir-130b   | C12orf73 | 0.343811588 mirna_pc |
| 25629 hsa-mir-130b   | PATZ1    | 0.402320089 mirna_pc |
| 25630 hsa-mir-130b   | C15orf61 | 0.340338889 mirna_pc |
| 25631 hsa-mir-130b   | ZNF711   | 0.33075093 mirna_pc  |
| 25632 hsa-mir-320b-2 | HOXC9    | 0.37420085 mirna_pc  |
| 25633 hsa-mir-320b-2 | MYBL2    | 0.389649347 mirna_pc |
| 25634 hsa-mir-320b-2 | PCNA     | 0.331816652 mirna_pc |
| 25635 hsa-mir-320b-2 | UBE2C    | 0.422204853 mirna_pc |
| 25636 hsa-mir-320b-2 | HDGF     | 0.354505179 mirna_pc |
| 25637 hsa-mir-320b-2 | FANCA    | 0.360623547 mirna_pc |
| 25638 hsa-mir-320b-2 | NCAPG    | 0.301225982 mirna_pc |
| 25639 hsa-mir-320b-2 | SPC25    | 0.356109286 mirna_pc |
| 25640 hsa-mir-320b-2 | MND1     | 0.368501247 mirna_pc |
| 25641 hsa-mir-320b-2 | DDX39    | 0.302940583 mirna_pc |
| 25642 hsa-mir-320b-2 | RAD54L   | 0.374042742 mirna_pc |
| 25643 hsa-mir-320b-2 | MAD2L1   | 0.327152426 mirna_pc |
| 25644 hsa-mir-320b-2 | TIMELESS | 0.311664293 mirna_pc |
| 25645 hsa-mir-320b-2 | ASF1B    | 0.311080409 mirna_pc |
| 25646 hsa-mir-320b-2 | TROAP    | 0.346754115 mirna_pc |
| 25647 hsa-mir-320b-2 | CDCA5    | 0.325394076 mirna_pc |
| 25648 hsa-mir-320b-2 | STMN1    | 0.403249639 mirna_pc |
| 25649 hsa-mir-320b-2 | CENPM    | 0.408387835 mirna_pc |

|       |                |          |             |          |
|-------|----------------|----------|-------------|----------|
| 25650 | hsa-mir-320b-2 | EXO1     | 0.318308439 | mirna_pc |
| 25651 | hsa-mir-320b-2 | CDCA2    | 0.333423441 | mirna_pc |
| 25652 | hsa-mir-320b-2 | DKC1     | 0.338843303 | mirna_pc |
| 25653 | hsa-mir-320b-2 | UBE2T    | 0.374144439 | mirna_pc |
| 25654 | hsa-mir-320b-2 | CKS2     | 0.309497502 | mirna_pc |
| 25655 | hsa-mir-320b-2 | CKS1B    | 0.393534654 | mirna_pc |
| 25656 | hsa-mir-320b-2 | SNRPB    | 0.307045631 | mirna_pc |
| 25657 | hsa-mir-320b-2 | PTBP1    | 0.318746532 | mirna_pc |
| 25658 | hsa-mir-320b-2 | RCC1     | 0.336635851 | mirna_pc |
| 25659 | hsa-mir-320b-2 | DTL      | 0.3068445   | mirna_pc |
| 25660 | hsa-mir-320b-2 | EME1     | 0.300328114 | mirna_pc |
| 25661 | hsa-mir-320b-2 | RECQL4   | 0.32357846  | mirna_pc |
| 25662 | hsa-mir-320b-2 | AURKB    | 0.330083056 | mirna_pc |
| 25663 | hsa-mir-320b-2 | CDT1     | 0.354468463 | mirna_pc |
| 25664 | hsa-mir-320b-2 | CDCA3    | 0.342194493 | mirna_pc |
| 25665 | hsa-mir-320b-2 | C1orf112 | 0.336666035 | mirna_pc |
| 25666 | hsa-mir-320b-2 | FEN1     | 0.332114828 | mirna_pc |
| 25667 | hsa-mir-320b-2 | PSMA7    | 0.366061401 | mirna_pc |
| 25668 | hsa-mir-320b-2 | PBK      | 0.344529589 | mirna_pc |
| 25669 | hsa-mir-320b-2 | C16orf59 | 0.343894865 | mirna_pc |
| 25670 | hsa-mir-320b-2 | RAE1     | 0.335247725 | mirna_pc |
| 25671 | hsa-mir-320b-2 | ADRM1    | 0.337014466 | mirna_pc |
| 25672 | hsa-mir-320b-2 | C12orf48 | 0.393038894 | mirna_pc |
| 25673 | hsa-mir-320b-2 | HNRNPL   | 0.331717811 | mirna_pc |
| 25674 | hsa-mir-320b-2 | ZWINT    | 0.392384643 | mirna_pc |
| 25675 | hsa-mir-320b-2 | TUBA1B   | 0.380715775 | mirna_pc |
| 25676 | hsa-mir-320b-2 | UBE2S    | 0.360181721 | mirna_pc |
| 25677 | hsa-mir-320b-2 | ILF2     | 0.329288406 | mirna_pc |
| 25678 | hsa-mir-320b-2 | TCF3     | 0.316093075 | mirna_pc |
| 25679 | hsa-mir-320b-2 | TYMS     | 0.302827015 | mirna_pc |
| 25680 | hsa-mir-320b-2 | C20orf20 | 0.342484678 | mirna_pc |
| 25681 | hsa-mir-320b-2 | RNASEH2A | 0.378158477 | mirna_pc |
| 25682 | hsa-mir-320b-2 | EPR1     | 0.351935428 | mirna_pc |
| 25683 | hsa-mir-320b-2 | H2AFX    | 0.411915273 | mirna_pc |
| 25684 | hsa-mir-320b-2 | SFRS2    | 0.305826488 | mirna_pc |
| 25685 | hsa-mir-320b-2 | UCK2     | 0.358044798 | mirna_pc |
| 25686 | hsa-mir-320b-2 | THOC4    | 0.437461719 | mirna_pc |
| 25687 | hsa-mir-320b-2 | RANBP1   | 0.32418162  | mirna_pc |
| 25688 | hsa-mir-320b-2 | E2F1     | 0.400498505 | mirna_pc |
| 25689 | hsa-mir-320b-2 | TH1L     | 0.38208294  | mirna_pc |
| 25690 | hsa-mir-320b-2 | SNRPA    | 0.410804991 | mirna_pc |
| 25691 | hsa-mir-320b-2 | FUS      | 0.350950308 | mirna_pc |
| 25692 | hsa-mir-320b-2 | U2AF2    | 0.32739522  | mirna_pc |
| 25693 | hsa-mir-320b-2 | CENPO    | 0.31745322  | mirna_pc |
| 25694 | hsa-mir-320b-2 | C19orf48 | 0.339546079 | mirna_pc |
| 25695 | hsa-mir-320b-2 | BAX      | 0.301690011 | mirna_pc |
| 25696 | hsa-mir-320b-2 | NUDT1    | 0.38508083  | mirna_pc |
| 25697 | hsa-mir-320b-2 | GINS2    | 0.342261011 | mirna_pc |
| 25698 | hsa-mir-320b-2 | NOP56    | 0.338724471 | mirna_pc |
| 25699 | hsa-mir-320b-2 | DSN1     | 0.30606021  | mirna_pc |
| 25700 | hsa-mir-320b-2 | SNHG1    | 0.302179674 | mirna_pc |
| 25701 | hsa-mir-320b-2 | CSE1L    | 0.34247756  | mirna_pc |
| 25702 | hsa-mir-320b-2 | DTYMK    | 0.326426552 | mirna_pc |
| 25703 | hsa-mir-320b-2 | PIGU     | 0.366997875 | mirna_pc |



|                      |              |                      |
|----------------------|--------------|----------------------|
| 25704 hsa-mir-320b-2 | HSPE1        | 0.348278092 mirna_pc |
| 25705 hsa-mir-320b-2 | C16orf75     | 0.326244844 mirna_pc |
| 25706 hsa-mir-320b-2 | CDK4         | 0.320221769 mirna_pc |
| 25707 hsa-mir-320b-2 | BCL2L12      | 0.319994616 mirna_pc |
| 25708 hsa-mir-320b-2 | CENPH        | 0.368681876 mirna_pc |
| 25709 hsa-mir-320b-2 | DDX27        | 0.320399538 mirna_pc |
| 25710 hsa-mir-320b-2 | RALY         | 0.456040764 mirna_pc |
| 25711 hsa-mir-320b-2 | MSH2         | 0.303641335 mirna_pc |
| 25712 hsa-mir-320b-2 | TOMM40       | 0.305965265 mirna_pc |
| 25713 hsa-mir-320b-2 | RFC4         | 0.311376823 mirna_pc |
| 25714 hsa-mir-320b-2 | CDC25A       | 0.352461768 mirna_pc |
| 25715 hsa-mir-320b-2 | H2AFZ        | 0.319433089 mirna_pc |
| 25716 hsa-mir-320b-2 | MAGOH        | 0.315031827 mirna_pc |
| 25717 hsa-mir-320b-2 | NUP37        | 0.305040429 mirna_pc |
| 25718 hsa-mir-320b-2 | MCM8         | 0.33515586 mirna_pc  |
| 25719 hsa-mir-320b-2 | BANF1        | 0.308536464 mirna_pc |
| 25720 hsa-mir-320b-2 | SNRPE        | 0.413445394 mirna_pc |
| 25721 hsa-mir-320b-2 | MARCKSL1     | 0.365399179 mirna_pc |
| 25722 hsa-mir-320b-2 | SNRPD2       | 0.362979945 mirna_pc |
| 25723 hsa-mir-320b-2 | DAZAP1       | 0.335993472 mirna_pc |
| 25724 hsa-mir-320b-2 | RPA3         | 0.320266443 mirna_pc |
| 25725 hsa-mir-320b-2 | TMEM201      | 0.371469311 mirna_pc |
| 25726 hsa-mir-320b-2 | MRPL9        | 0.333377235 mirna_pc |
| 25727 hsa-mir-320b-2 | PFDN4        | 0.376361632 mirna_pc |
| 25728 hsa-mir-320b-2 | PAFAH1B3     | 0.35105092 mirna_pc  |
| 25729 hsa-mir-320b-2 | SRRT         | 0.349978775 mirna_pc |
| 25730 hsa-mir-320b-2 | CACYBP       | 0.325165375 mirna_pc |
| 25731 hsa-mir-320b-2 | DCTPP1       | 0.345614915 mirna_pc |
| 25732 hsa-mir-320b-2 | PSRC1        | 0.335462328 mirna_pc |
| 25733 hsa-mir-320b-2 | DGUOK        | 0.309457773 mirna_pc |
| 25734 hsa-mir-320b-2 | POU2F1       | 0.306017054 mirna_pc |
| 25735 hsa-mir-320b-2 | FBL          | 0.32559726 mirna_pc  |
| 25736 hsa-mir-320b-2 | STIP1        | 0.327196551 mirna_pc |
| 25737 hsa-mir-320b-2 | SCNM1        | 0.336561082 mirna_pc |
| 25738 hsa-mir-320b-2 | TMPO         | 0.323893862 mirna_pc |
| 25739 hsa-mir-320b-2 | NR2C2AP      | 0.334549744 mirna_pc |
| 25740 hsa-mir-320b-2 | MRT04        | 0.315862483 mirna_pc |
| 25741 hsa-mir-320b-2 | LSM 7.00     | 0.331502114 mirna_pc |
| 25742 hsa-mir-320b-2 | PPIH         | 0.332479981 mirna_pc |
| 25743 hsa-mir-320b-2 | LOC100128191 | 0.322362182 mirna_pc |
| 25744 hsa-mir-320b-2 | HMGN2        | 0.333925644 mirna_pc |
| 25745 hsa-mir-320b-2 | ETV4         | 0.330421668 mirna_pc |
| 25746 hsa-mir-320b-2 | POLA2        | 0.303124038 mirna_pc |
| 25747 hsa-mir-320b-2 | SNRPF        | 0.34593563 mirna_pc  |
| 25748 hsa-mir-320b-2 | HSPBP1       | 0.343025707 mirna_pc |
| 25749 hsa-mir-320b-2 | SSRP1        | 0.354996949 mirna_pc |
| 25750 hsa-mir-320b-2 | POLR2D       | 0.329722105 mirna_pc |
| 25751 hsa-mir-320b-2 | KHDRBS1      | 0.332933337 mirna_pc |
| 25752 hsa-mir-320b-2 | SLC5A6       | 0.382424102 mirna_pc |
| 25753 hsa-mir-320b-2 | C20orf27     | 0.333682497 mirna_pc |
| 25754 hsa-mir-320b-2 | LOC92659     | 0.416214879 mirna_pc |
| 25755 hsa-mir-320b-2 | AHCY         | 0.359442036 mirna_pc |
| 25756 hsa-mir-320b-2 | SNRNP40      | 0.35204058 mirna_pc  |
| 25757 hsa-mir-320b-2 | NONO         | 0.449287186 mirna_pc |

|       |                |           |             |          |
|-------|----------------|-----------|-------------|----------|
| 25758 | hsa-mir-320b-2 | OBFC2B    | 0.39134088  | mirna_pc |
| 25759 | hsa-mir-320b-2 | PTMA      | 0.334715186 | mirna_pc |
| 25760 | hsa-mir-320b-2 | LSM 4.00  | 0.402954575 | mirna_pc |
| 25761 | hsa-mir-320b-2 | C11orf84  | 0.339654936 | mirna_pc |
| 25762 | hsa-mir-320b-2 | DPY30     | 0.330988988 | mirna_pc |
| 25763 | hsa-mir-320b-2 | SCAMP3    | 0.327861075 | mirna_pc |
| 25764 | hsa-mir-320b-2 | SAC3D1    | 0.307460245 | mirna_pc |
| 25765 | hsa-mir-320b-2 | RPS21     | 0.339759279 | mirna_pc |
| 25766 | hsa-mir-320b-2 | MAGOHB    | 0.311899356 | mirna_pc |
| 25767 | hsa-mir-320b-2 | COMMD4    | 0.326903197 | mirna_pc |
| 25768 | hsa-mir-320b-2 | PDRG1     | 0.341390032 | mirna_pc |
| 25769 | hsa-mir-320b-2 | C20orf199 | 0.369434737 | mirna_pc |
| 25770 | hsa-mir-320b-2 | HEATR2    | 0.304380565 | mirna_pc |
| 25771 | hsa-mir-320b-2 | AZI1      | 0.303645073 | mirna_pc |
| 25772 | hsa-mir-320b-2 | WDR74     | 0.323655958 | mirna_pc |
| 25773 | hsa-mir-320b-2 | POLR2G    | 0.337725751 | mirna_pc |
| 25774 | hsa-mir-320b-2 | C1orf174  | 0.31264776  | mirna_pc |
| 25775 | hsa-mir-320b-2 | MRPL17    | 0.356033053 | mirna_pc |
| 25776 | hsa-mir-320b-2 | EIF2S2    | 0.300156707 | mirna_pc |
| 25777 | hsa-mir-320b-2 | LAS1L     | 0.360382998 | mirna_pc |
| 25778 | hsa-mir-320b-2 | SFPQ      | 0.321103468 | mirna_pc |
| 25779 | hsa-mir-320b-2 | VPS72     | 0.335882297 | mirna_pc |
| 25780 | hsa-mir-320b-2 | CADM1     | 0.332607241 | mirna_pc |
| 25781 | hsa-mir-320b-2 | MRPL12    | 0.38021203  | mirna_pc |
| 25782 | hsa-mir-320b-2 | EMG1      | 0.32462699  | mirna_pc |
| 25783 | hsa-mir-320b-2 | ASCL2     | 0.301965741 | mirna_pc |
| 25784 | hsa-mir-320b-2 | CSTF1     | 0.307183521 | mirna_pc |
| 25785 | hsa-mir-320b-2 | MRPL11    | 0.360863226 | mirna_pc |
| 25786 | hsa-mir-320b-2 | HNRNPA1   | 0.361569308 | mirna_pc |
| 25787 | hsa-mir-320b-2 | PPP1R8    | 0.349165792 | mirna_pc |
| 25788 | hsa-mir-320b-2 | MEX3A     | 0.331180058 | mirna_pc |
| 25789 | hsa-mir-320b-2 | C19orf24  | 0.322179671 | mirna_pc |
| 25790 | hsa-mir-320b-2 | HNRNPA1L2 | 0.38855103  | mirna_pc |
| 25791 | hsa-mir-320b-2 | MACROD1   | 0.316042977 | mirna_pc |
| 25792 | hsa-mir-320b-2 | POLR3K    | 0.333590931 | mirna_pc |
| 25793 | hsa-mir-320b-2 | HAUS7     | 0.306016597 | mirna_pc |
| 25794 | hsa-mir-320b-2 | MRPL51    | 0.30197891  | mirna_pc |
| 25795 | hsa-mir-320b-2 | C1orf35   | 0.33541021  | mirna_pc |
| 25796 | hsa-mir-320b-2 | TGIF2     | 0.321068226 | mirna_pc |
| 25797 | hsa-mir-320b-2 | EBP       | 0.326109647 | mirna_pc |
| 25798 | hsa-mir-320b-2 | SLC35C2   | 0.324351652 | mirna_pc |
| 25799 | hsa-mir-320b-2 | POLE      | 0.33291251  | mirna_pc |
| 25800 | hsa-mir-320b-2 | MUTYH     | 0.385715375 | mirna_pc |
| 25801 | hsa-mir-320b-2 | C11orf31  | 0.338755853 | mirna_pc |
| 25802 | hsa-mir-320b-2 | TMEM216   | 0.321976714 | mirna_pc |
| 25803 | hsa-mir-320b-2 | RBMX2     | 0.320259076 | mirna_pc |
| 25804 | hsa-mir-320b-2 | RBMX      | 0.424613912 | mirna_pc |
| 25805 | hsa-mir-320b-2 | ALKBH2    | 0.384448569 | mirna_pc |
| 25806 | hsa-mir-320b-2 | BAMBI     | 0.306613842 | mirna_pc |
| 25807 | hsa-mir-320b-2 | C19orf61  | 0.318733882 | mirna_pc |
| 25808 | hsa-mir-320b-2 | C11orf48  | 0.374478605 | mirna_pc |
| 25809 | hsa-mir-320b-2 | ACD       | 0.340666455 | mirna_pc |
| 25810 | hsa-mir-320b-2 | MRPL37    | 0.347206588 | mirna_pc |
| 25811 | hsa-mir-320b-2 | CCDC23    | 0.303319933 | mirna_pc |

|       |                |           |             |          |
|-------|----------------|-----------|-------------|----------|
| 25812 | hsa-mir-320b-2 | EIF3I     | 0.320416038 | mirna_pc |
| 25813 | hsa-mir-320b-2 | MSX2      | 0.300094401 | mirna_pc |
| 25814 | hsa-mir-320b-2 | APOA1BP   | 0.379642869 | mirna_pc |
| 25815 | hsa-mir-320b-2 | ZNF511    | 0.311625067 | mirna_pc |
| 25816 | hsa-mir-320b-2 | B3GAT3    | 0.400023195 | mirna_pc |
| 25817 | hsa-mir-320b-2 | TIMM10    | 0.349525448 | mirna_pc |
| 25818 | hsa-mir-320b-2 | ITPRIPL1  | 0.319937851 | mirna_pc |
| 25819 | hsa-mir-320b-2 | STRA13    | 0.600098278 | mirna_pc |
| 25820 | hsa-mir-320b-2 | TIMM16    | 0.316496637 | mirna_pc |
| 25821 | hsa-mir-320b-2 | NOTUM     | 0.437848264 | mirna_pc |
| 25822 | hsa-mir-320b-2 | SNHG6     | 0.354231503 | mirna_pc |
| 25823 | hsa-mir-320b-2 | TMEM180   | 0.306816174 | mirna_pc |
| 25824 | hsa-mir-320b-2 | CUEDC2    | 0.312277872 | mirna_pc |
| 25825 | hsa-mir-320b-2 | TBX3      | 0.353017822 | mirna_pc |
| 25826 | hsa-mir-320b-2 | GANAB     | 0.350007243 | mirna_pc |
| 25827 | hsa-mir-320b-2 | ANAPC11   | 0.341984425 | mirna_pc |
| 25828 | hsa-mir-320b-2 | C11orf83  | 0.38827479  | mirna_pc |
| 25829 | hsa-mir-320b-2 | ZNF593    | 0.363511567 | mirna_pc |
| 25830 | hsa-mir-320b-2 | DYNLRB1   | 0.349600126 | mirna_pc |
| 25831 | hsa-mir-320b-2 | COPZ1     | 0.325791915 | mirna_pc |
| 25832 | hsa-mir-320b-2 | GPR3      | 0.406654942 | mirna_pc |
| 25833 | hsa-mir-320b-2 | EXOSC1    | 0.341382797 | mirna_pc |
| 25834 | hsa-mir-320b-2 | SCLY      | 0.344393727 | mirna_pc |
| 25835 | hsa-mir-320b-2 | COMMD7    | 0.34599567  | mirna_pc |
| 25836 | hsa-mir-320b-2 | AAAS      | 0.389112533 | mirna_pc |
| 25837 | hsa-mir-320b-2 | DKK 1.00  | 0.33994252  | mirna_pc |
| 25838 | hsa-mir-320b-2 | C2orf79   | 0.317743923 | mirna_pc |
| 25839 | hsa-mir-320b-2 | MRPS26    | 0.345920921 | mirna_pc |
| 25840 | hsa-mir-320b-2 | PYCR1     | 0.32441855  | mirna_pc |
| 25841 | hsa-mir-320b-2 | SFRS7     | 0.306387873 | mirna_pc |
| 25842 | hsa-mir-320b-2 | MANBAL    | 0.318145255 | mirna_pc |
| 25843 | hsa-mir-320b-2 | PEX10     | 0.32217579  | mirna_pc |
| 25844 | hsa-mir-320b-2 | EMD       | 0.307886519 | mirna_pc |
| 25845 | hsa-mir-320b-2 | RPS3      | 0.360133822 | mirna_pc |
| 25846 | hsa-mir-320b-2 | NKD1      | 0.388536023 | mirna_pc |
| 25847 | hsa-mir-320b-2 | C10orf35  | 0.332016613 | mirna_pc |
| 25848 | hsa-mir-320b-2 | LRRC45    | 0.338957378 | mirna_pc |
| 25849 | hsa-mir-320b-2 | AXIN2     | 0.341216812 | mirna_pc |
| 25850 | hsa-mir-320b-2 | SCAND1    | 0.33607472  | mirna_pc |
| 25851 | hsa-mir-320b-2 | CNOT7     | 0.398869593 | mirna_pc |
| 25852 | hsa-mir-320b-2 | PGAP2     | 0.317121657 | mirna_pc |
| 25853 | hsa-mir-320b-2 | LOC728024 | 0.304330003 | mirna_pc |
| 25854 | hsa-mir-320b-2 | FN3KRP    | 0.342624826 | mirna_pc |
| 25855 | hsa-mir-320b-2 | MRPL55    | 0.302148947 | mirna_pc |
| 25856 | hsa-mir-320b-2 | MTP 18.00 | 0.302926975 | mirna_pc |
| 25857 | hsa-mir-320b-2 | ERGIC3    | 0.396124586 | mirna_pc |
| 25858 | hsa-mir-320b-2 | TIMM17B   | 0.38910271  | mirna_pc |
| 25859 | hsa-mir-320b-2 | SEPHS1    | 0.303993326 | mirna_pc |
| 25860 | hsa-mir-320b-2 | TAF10     | 0.30737696  | mirna_pc |
| 25861 | hsa-mir-320b-2 | C11orf10  | 0.327448209 | mirna_pc |
| 25862 | hsa-mir-320b-2 | ZNF259    | 0.432523819 | mirna_pc |
| 25863 | hsa-mir-320b-2 | C12orf57  | 0.317661672 | mirna_pc |
| 25864 | hsa-mir-320b-2 | MLST8     | 0.318261338 | mirna_pc |
| 25865 | hsa-mir-320b-2 | C16orf13  | 0.306753124 | mirna_pc |

|                      |           |                      |
|----------------------|-----------|----------------------|
| 25866 hsa-mir-320b-2 | RPL39     | 0.314685568 mirna_pc |
| 25867 hsa-mir-320b-2 | C17orf89  | 0.318978546 mirna_pc |
| 25868 hsa-mir-320b-2 | MYL6B     | 0.303875556 mirna_pc |
| 25869 hsa-mir-320b-2 | UQCRHL    | 0.335877755 mirna_pc |
| 25870 hsa-mir-320b-2 | CAMTA1    | 0.366410342 mirna_pc |
| 25871 hsa-mir-320b-2 | RPS20     | 0.316614217 mirna_pc |
| 25872 hsa-mir-320b-2 | C20orf196 | 0.336406405 mirna_pc |
| 25873 hsa-mir-320b-2 | TMEM160   | 0.310248861 mirna_pc |
| 25874 hsa-mir-320b-2 | BIN3      | 0.36652681 mirna_pc  |
| 25875 hsa-mir-320b-2 | ATP5G2    | 0.331591508 mirna_pc |
| 25876 hsa-mir-320b-2 | C17orf81  | 0.332302353 mirna_pc |
| 25877 hsa-mir-320b-2 | RPS27     | 0.342847684 mirna_pc |
| 25878 hsa-mir-320b-2 | NAP1L1    | 0.366659278 mirna_pc |
| 25879 hsa-mir-320b-2 | SMG5      | 0.302577201 mirna_pc |
| 25880 hsa-mir-320b-2 | SPCS2     | 0.396803862 mirna_pc |
| 25881 hsa-mir-320b-2 | NDUFC2    | 0.348176562 mirna_pc |
| 25882 hsa-mir-320b-2 | GLT25D2   | 0.306927656 mirna_pc |
| 25883 hsa-mir-320b-2 | BUD13     | 0.476897718 mirna_pc |
| 25884 hsa-mir-320b-2 | LSM 3.00  | 0.312107568 mirna_pc |
| 25885 hsa-mir-320b-2 | MYCN      | 0.336936766 mirna_pc |
| 25886 hsa-mir-320b-2 | PMF1      | 0.385818672 mirna_pc |
| 25887 hsa-mir-320b-2 | RPLP2     | 0.321086412 mirna_pc |
| 25888 hsa-mir-320b-2 | MSI1      | 0.312702795 mirna_pc |
| 25889 hsa-mir-320b-2 | NDUFB11   | 0.355595529 mirna_pc |
| 25890 hsa-mir-320b-2 | ZNF232    | 0.311236261 mirna_pc |
| 25891 hsa-mir-320b-2 | ASPSCR1   | 0.475740012 mirna_pc |
| 25892 hsa-mir-320b-2 | POLR3D    | 0.326342331 mirna_pc |
| 25893 hsa-mir-320b-2 | RBBP4     | 0.335189747 mirna_pc |
| 25894 hsa-mir-320b-2 | XPO7      | 0.300382629 mirna_pc |
| 25895 hsa-mir-320b-2 | PTPMT1    | 0.300290481 mirna_pc |
| 25896 hsa-mir-320b-2 | LOC653566 | 0.367056141 mirna_pc |
| 25897 hsa-mir-320b-2 | KIAA1967  | 0.417067401 mirna_pc |
| 25898 hsa-mir-320b-2 | MCAT      | 0.300334324 mirna_pc |
| 25899 hsa-mir-320b-2 | SCML2     | 0.32326019 mirna_pc  |
| 25900 hsa-mir-320b-2 | PDXP      | 0.314453107 mirna_pc |
| 25901 hsa-mir-320b-2 | ETV5      | 0.330505202 mirna_pc |
| 25902 hsa-mir-320b-2 | COL9A3    | 0.312091401 mirna_pc |
| 25903 hsa-mir-320b-2 | DACT2     | 0.34051274 mirna_pc  |
| 25904 hsa-mir-320b-2 | SNRNP25   | 0.36490063 mirna_pc  |
| 25905 hsa-mir-320b-2 | PREB      | 0.452038603 mirna_pc |
| 25906 hsa-mir-320b-2 | PIN4      | 0.317258547 mirna_pc |
| 25907 hsa-mir-320b-2 | SSR2      | 0.366451901 mirna_pc |
| 25908 hsa-mir-320b-2 | MRPL23    | 0.323153128 mirna_pc |
| 25909 hsa-mir-320b-2 | VAPB      | 0.310616685 mirna_pc |
| 25910 hsa-mir-320b-2 | UXT       | 0.398326025 mirna_pc |
| 25911 hsa-mir-320b-2 | PCBD1     | 0.31830087 mirna_pc  |
| 25912 hsa-mir-320b-2 | UQCRH     | 0.304535149 mirna_pc |
| 25913 hsa-mir-320b-2 | CTNBL1    | 0.309939368 mirna_pc |
| 25914 hsa-mir-320b-2 | NUDC      | 0.349150252 mirna_pc |
| 25915 hsa-mir-320b-2 | PARK7     | 0.349531575 mirna_pc |
| 25916 hsa-mir-320b-2 | ZNF711    | 0.311843641 mirna_pc |
| 25917 hsa-let-7d     | TPX2      | 0.313168125 mirna_pc |
| 25918 hsa-let-7d     | KPNA2     | 0.311207162 mirna_pc |
| 25919 hsa-let-7d     | CENPF     | 0.326700699 mirna_pc |

|                  |        |                      |
|------------------|--------|----------------------|
| 25920 hsa-let-7d | RCC2   | 0.331328872 mirna_pc |
| 25921 hsa-let-7d | KIF11  | 0.374541543 mirna_pc |
| 25922 hsa-let-7d | ECT2   | 0.436081766 mirna_pc |
| 25923 hsa-let-7d | FOXM1  | 0.312213545 mirna_pc |
| 25924 hsa-let-7d | SPC24  | 0.316832284 mirna_pc |
| 25925 hsa-let-7d | CDK1   | 0.415281217 mirna_pc |
| 25926 hsa-let-7d | CDC25C | 0.353457213 mirna_pc |
| 25927 hsa-let-7d | MYBL2  | 0.367980274 mirna_pc |
| 25928 hsa-let-7d | PLK1   | 0.309236737 mirna_pc |
| 25929 hsa-let-7d | PCNA   | 0.328183285 mirna_pc |
| 25930 hsa-let-7d | UBE2C  | 0.429329379 mirna_pc |
| 25931 hsa-let-7d | PRC1   | 0.36758301 mirna_pc  |
| 25932 hsa-let-7d | NUSAP1 | 0.530592367 mirna_pc |
| 25933 hsa-let-7d | MCM4   | 0.368715679 mirna_pc |
| 25934 hsa-let-7d | KIFC1  | 0.374087582 mirna_pc |
| 25935 hsa-let-7d | BUB1B  | 0.453096677 mirna_pc |
| 25936 hsa-let-7d | HDGF   | 0.362124588 mirna_pc |
| 25937 hsa-let-7d | CKAP2  | 0.303340734 mirna_pc |
| 25938 hsa-let-7d | FAM72A | 0.328199262 mirna_pc |
| 25939 hsa-let-7d | KIF2C  | 0.321405685 mirna_pc |
| 25940 hsa-let-7d | NCAPG  | 0.401213874 mirna_pc |
| 25941 hsa-let-7d | CDC20  | 0.385773543 mirna_pc |
| 25942 hsa-let-7d | CCNA2  | 0.381711706 mirna_pc |
| 25943 hsa-let-7d | CEP55  | 0.390888379 mirna_pc |
| 25944 hsa-let-7d | CDC25B | 0.327079072 mirna_pc |
| 25945 hsa-let-7d | SPC25  | 0.381089412 mirna_pc |
| 25946 hsa-let-7d | FANCI  | 0.370589258 mirna_pc |
| 25947 hsa-let-7d | LMNB2  | 0.33631058 mirna_pc  |
| 25948 hsa-let-7d | NEK2   | 0.411182366 mirna_pc |
| 25949 hsa-let-7d | MND1   | 0.315519991 mirna_pc |
| 25950 hsa-let-7d | KIF22  | 0.32706576 mirna_pc  |
| 25951 hsa-let-7d | DDX39  | 0.349116828 mirna_pc |
| 25952 hsa-let-7d | NCAPH  | 0.366662201 mirna_pc |
| 25953 hsa-let-7d | KIF23  | 0.33061207 mirna_pc  |
| 25954 hsa-let-7d | RAD54L | 0.323299653 mirna_pc |
| 25955 hsa-let-7d | CENPA  | 0.412446422 mirna_pc |
| 25956 hsa-let-7d | MAD2L1 | 0.362397676 mirna_pc |
| 25957 hsa-let-7d | LMNB1  | 0.341175323 mirna_pc |
| 25958 hsa-let-7d | ASF1B  | 0.382274245 mirna_pc |
| 25959 hsa-let-7d | CDCA8  | 0.358487627 mirna_pc |
| 25960 hsa-let-7d | TROAP  | 0.359905953 mirna_pc |
| 25961 hsa-let-7d | CDCA5  | 0.435294302 mirna_pc |
| 25962 hsa-let-7d | CDC45  | 0.429613449 mirna_pc |
| 25963 hsa-let-7d | STMN1  | 0.365266787 mirna_pc |
| 25964 hsa-let-7d | CENPM  | 0.391654121 mirna_pc |
| 25965 hsa-let-7d | TK1    | 0.334916401 mirna_pc |
| 25966 hsa-let-7d | DKC1   | 0.35479769 mirna_pc  |
| 25967 hsa-let-7d | UBE2T  | 0.502809032 mirna_pc |
| 25968 hsa-let-7d | CKS2   | 0.465929089 mirna_pc |
| 25969 hsa-let-7d | CKS1B  | 0.491311254 mirna_pc |
| 25970 hsa-let-7d | MCM2   | 0.371783437 mirna_pc |
| 25971 hsa-let-7d | KIF4A  | 0.302988984 mirna_pc |
| 25972 hsa-let-7d | ORC1L  | 0.326611263 mirna_pc |
| 25973 hsa-let-7d | SNRPB  | 0.345189933 mirna_pc |

|                  |          |                      |
|------------------|----------|----------------------|
| 25974 hsa-let-7d | RACGAP1  | 0.353246453 mirna_pc |
| 25975 hsa-let-7d | PTBP1    | 0.315329564 mirna_pc |
| 25976 hsa-let-7d | CCNB2    | 0.455674108 mirna_pc |
| 25977 hsa-let-7d | NUF2     | 0.333432297 mirna_pc |
| 25978 hsa-let-7d | DEPDC1   | 0.314084669 mirna_pc |
| 25979 hsa-let-7d | PTTG1    | 0.323742384 mirna_pc |
| 25980 hsa-let-7d | SKA3     | 0.354646354 mirna_pc |
| 25981 hsa-let-7d | HJURP    | 0.438247475 mirna_pc |
| 25982 hsa-let-7d | RAD51    | 0.441535536 mirna_pc |
| 25983 hsa-let-7d | BLM      | 0.363265073 mirna_pc |
| 25984 hsa-let-7d | PAICS    | 0.367873703 mirna_pc |
| 25985 hsa-let-7d | BIRC5    | 0.396824512 mirna_pc |
| 25986 hsa-let-7d | RCC1     | 0.398823901 mirna_pc |
| 25987 hsa-let-7d | OIP5     | 0.469065809 mirna_pc |
| 25988 hsa-let-7d | DTL      | 0.364569791 mirna_pc |
| 25989 hsa-let-7d | RECQL4   | 0.487192467 mirna_pc |
| 25990 hsa-let-7d | AURKB    | 0.432188154 mirna_pc |
| 25991 hsa-let-7d | GSG2     | 0.362846603 mirna_pc |
| 25992 hsa-let-7d | KIF20A   | 0.305371774 mirna_pc |
| 25993 hsa-let-7d | CHEK2    | 0.503446321 mirna_pc |
| 25994 hsa-let-7d | CDCA3    | 0.370871588 mirna_pc |
| 25995 hsa-let-7d | ALG3     | 0.479056474 mirna_pc |
| 25996 hsa-let-7d | FEN1     | 0.336287428 mirna_pc |
| 25997 hsa-let-7d | TRAIP    | 0.317857642 mirna_pc |
| 25998 hsa-let-7d | ORC6L    | 0.324787013 mirna_pc |
| 25999 hsa-let-7d | ERH      | 0.304522457 mirna_pc |
| 26000 hsa-let-7d | PSMA7    | 0.344777499 mirna_pc |
| 26001 hsa-let-7d | C16orf59 | 0.349922299 mirna_pc |
| 26002 hsa-let-7d | CDKN3    | 0.347126005 mirna_pc |
| 26003 hsa-let-7d | FAM72D   | 0.324648183 mirna_pc |
| 26004 hsa-let-7d | FAM72B   | 0.332886801 mirna_pc |
| 26005 hsa-let-7d | NEIL3    | 0.324560336 mirna_pc |
| 26006 hsa-let-7d | ACTL6A   | 0.402270335 mirna_pc |
| 26007 hsa-let-7d | C12orf48 | 0.366057453 mirna_pc |
| 26008 hsa-let-7d | HNRNPL   | 0.394874104 mirna_pc |
| 26009 hsa-let-7d | ZWILCH   | 0.426043039 mirna_pc |
| 26010 hsa-let-7d | PKMYT1   | 0.312481262 mirna_pc |
| 26011 hsa-let-7d | TTK      | 0.403985796 mirna_pc |
| 26012 hsa-let-7d | ZWINT    | 0.416402266 mirna_pc |
| 26013 hsa-let-7d | TUBA1B   | 0.311621644 mirna_pc |
| 26014 hsa-let-7d | WDR67    | 0.338446038 mirna_pc |
| 26015 hsa-let-7d | RUVBL1   | 0.331013209 mirna_pc |
| 26016 hsa-let-7d | BUB3     | 0.300633273 mirna_pc |
| 26017 hsa-let-7d | UBE2S    | 0.433632508 mirna_pc |
| 26018 hsa-let-7d | PSMA4    | 0.323214851 mirna_pc |
| 26019 hsa-let-7d | NCAPD2   | 0.347384274 mirna_pc |
| 26020 hsa-let-7d | HNRNPC   | 0.375141854 mirna_pc |
| 26021 hsa-let-7d | ILF2     | 0.399582321 mirna_pc |
| 26022 hsa-let-7d | TFRC     | 0.344153626 mirna_pc |
| 26023 hsa-let-7d | TYMS     | 0.317296684 mirna_pc |
| 26024 hsa-let-7d | RNASEH2A | 0.345744713 mirna_pc |
| 26025 hsa-let-7d | EPR1     | 0.416958698 mirna_pc |
| 26026 hsa-let-7d | H2AFX    | 0.325999834 mirna_pc |
| 26027 hsa-let-7d | DCAF13   | 0.33959804 mirna_pc  |

|                  |          |                      |
|------------------|----------|----------------------|
| 26028 hsa-let-7d | UCK2     | 0.443394973 mirna_pc |
| 26029 hsa-let-7d | THOC4    | 0.351023461 mirna_pc |
| 26030 hsa-let-7d | NFKBIL2  | 0.343926297 mirna_pc |
| 26031 hsa-let-7d | PTGES3   | 0.361677224 mirna_pc |
| 26032 hsa-let-7d | PRIM2    | 0.371198055 mirna_pc |
| 26033 hsa-let-7d | FAM60A   | 0.314301061 mirna_pc |
| 26034 hsa-let-7d | HMGB3    | 0.368920754 mirna_pc |
| 26035 hsa-let-7d | FANCD2   | 0.301978027 mirna_pc |
| 26036 hsa-let-7d | FAM64A   | 0.427923894 mirna_pc |
| 26037 hsa-let-7d | RANBP1   | 0.402439611 mirna_pc |
| 26038 hsa-let-7d | MTBP     | 0.367457277 mirna_pc |
| 26039 hsa-let-7d | E2F1     | 0.40581033 mirna_pc  |
| 26040 hsa-let-7d | EIF4A3   | 0.315771358 mirna_pc |
| 26041 hsa-let-7d | TH1L     | 0.348323085 mirna_pc |
| 26042 hsa-let-7d | MCM3     | 0.302477457 mirna_pc |
| 26043 hsa-let-7d | SNRPA    | 0.383704616 mirna_pc |
| 26044 hsa-let-7d | CENPW    | 0.33087172 mirna_pc  |
| 26045 hsa-let-7d | DNAJC9   | 0.427447732 mirna_pc |
| 26046 hsa-let-7d | POC1A    | 0.368979399 mirna_pc |
| 26047 hsa-let-7d | CENPO    | 0.371789528 mirna_pc |
| 26048 hsa-let-7d | CENPL    | 0.323470217 mirna_pc |
| 26049 hsa-let-7d | NUDT1    | 0.335991138 mirna_pc |
| 26050 hsa-let-7d | CCT3     | 0.378662243 mirna_pc |
| 26051 hsa-let-7d | GINS2    | 0.343171158 mirna_pc |
| 26052 hsa-let-7d | C9orf140 | 0.41196592 mirna_pc  |
| 26053 hsa-let-7d | TEAD4    | 0.317017106 mirna_pc |
| 26054 hsa-let-7d | NOP56    | 0.327550313 mirna_pc |
| 26055 hsa-let-7d | GRINA    | 0.318431421 mirna_pc |
| 26056 hsa-let-7d | CDCA4    | 0.316979 mirna_pc    |
| 26057 hsa-let-7d | CSE1L    | 0.397853782 mirna_pc |
| 26058 hsa-let-7d | DTYMK    | 0.405518928 mirna_pc |
| 26059 hsa-let-7d | TMEM206  | 0.312717771 mirna_pc |
| 26060 hsa-let-7d | HSPE1    | 0.328668334 mirna_pc |
| 26061 hsa-let-7d | EBNA1BP2 | 0.322648766 mirna_pc |
| 26062 hsa-let-7d | CFL1     | 0.32844252 mirna_pc  |
| 26063 hsa-let-7d | NOP2     | 0.335906877 mirna_pc |
| 26064 hsa-let-7d | CAD      | 0.307521497 mirna_pc |
| 26065 hsa-let-7d | ZFP64    | 0.374267543 mirna_pc |
| 26066 hsa-let-7d | CDK4     | 0.358283596 mirna_pc |
| 26067 hsa-let-7d | HNRNPR   | 0.336596252 mirna_pc |
| 26068 hsa-let-7d | CENPH    | 0.339462822 mirna_pc |
| 26069 hsa-let-7d | CHAF1B   | 0.354967682 mirna_pc |
| 26070 hsa-let-7d | ACYP1    | 0.349290097 mirna_pc |
| 26071 hsa-let-7d | MSH2     | 0.386904351 mirna_pc |
| 26072 hsa-let-7d | TOMM40   | 0.316987913 mirna_pc |
| 26073 hsa-let-7d | CDC7     | 0.347257635 mirna_pc |
| 26074 hsa-let-7d | YDJC     | 0.422651408 mirna_pc |
| 26075 hsa-let-7d | HAUS8    | 0.343436093 mirna_pc |
| 26076 hsa-let-7d | RFC4     | 0.475885379 mirna_pc |
| 26077 hsa-let-7d | BRIX1    | 0.325539958 mirna_pc |
| 26078 hsa-let-7d | DDX11    | 0.309029972 mirna_pc |
| 26079 hsa-let-7d | SF3B14   | 0.308398831 mirna_pc |
| 26080 hsa-let-7d | CDC25A   | 0.33103076 mirna_pc  |
| 26081 hsa-let-7d | RAD54B   | 0.342599654 mirna_pc |

|                  |          |                      |
|------------------|----------|----------------------|
| 26082 hsa-let-7d | H2AFZ    | 0.347844761 mirna_pc |
| 26083 hsa-let-7d | PRR7     | 0.304637778 mirna_pc |
| 26084 hsa-let-7d | MAGOH    | 0.324287113 mirna_pc |
| 26085 hsa-let-7d | DDX12    | 0.312414597 mirna_pc |
| 26086 hsa-let-7d | DSCC1    | 0.379732629 mirna_pc |
| 26087 hsa-let-7d | NUP37    | 0.365318071 mirna_pc |
| 26088 hsa-let-7d | SMC2     | 0.402901667 mirna_pc |
| 26089 hsa-let-7d | IRAK1    | 0.320384258 mirna_pc |
| 26090 hsa-let-7d | CLN6     | 0.417269878 mirna_pc |
| 26091 hsa-let-7d | BANF1    | 0.39927058 mirna_pc  |
| 26092 hsa-let-7d | SNRPE    | 0.38250457 mirna_pc  |
| 26093 hsa-let-7d | C21orf45 | 0.316375221 mirna_pc |
| 26094 hsa-let-7d | ATIC     | 0.33691389 mirna_pc  |
| 26095 hsa-let-7d | PPM1G    | 0.330424777 mirna_pc |
| 26096 hsa-let-7d | NPM3     | 0.415176229 mirna_pc |
| 26097 hsa-let-7d | TFAP4    | 0.341257776 mirna_pc |
| 26098 hsa-let-7d | NUDT5    | 0.3630218 mirna_pc   |
| 26099 hsa-let-7d | ZNF367   | 0.519668599 mirna_pc |
| 26100 hsa-let-7d | DAZAP1   | 0.401812487 mirna_pc |
| 26101 hsa-let-7d | CBX8     | 0.361392423 mirna_pc |
| 26102 hsa-let-7d | PPIL5    | 0.320734308 mirna_pc |
| 26103 hsa-let-7d | WDR34    | 0.439627957 mirna_pc |
| 26104 hsa-let-7d | TMEM201  | 0.426818474 mirna_pc |
| 26105 hsa-let-7d | NCL      | 0.332234487 mirna_pc |
| 26106 hsa-let-7d | MRPL9    | 0.37554211 mirna_pc  |
| 26107 hsa-let-7d | CACYBP   | 0.310002737 mirna_pc |
| 26108 hsa-let-7d | DCTPP1   | 0.334644279 mirna_pc |
| 26109 hsa-let-7d | PSRC1    | 0.327619127 mirna_pc |
| 26110 hsa-let-7d | ODF2     | 0.436045451 mirna_pc |
| 26111 hsa-let-7d | MRPL47   | 0.364762956 mirna_pc |
| 26112 hsa-let-7d | STIP1    | 0.321992765 mirna_pc |
| 26113 hsa-let-7d | HIST1H1E | 0.306611189 mirna_pc |
| 26114 hsa-let-7d | THOP1    | 0.384091543 mirna_pc |
| 26115 hsa-let-7d | EXOSC5   | 0.323710478 mirna_pc |
| 26116 hsa-let-7d | SCNM1    | 0.30022491 mirna_pc  |
| 26117 hsa-let-7d | CDC123   | 0.319680212 mirna_pc |
| 26118 hsa-let-7d | SET      | 0.524263512 mirna_pc |
| 26119 hsa-let-7d | POLR2H   | 0.431097379 mirna_pc |
| 26120 hsa-let-7d | NR2C2AP  | 0.339813513 mirna_pc |
| 26121 hsa-let-7d | C3orf26  | 0.346482263 mirna_pc |
| 26122 hsa-let-7d | LSG1     | 0.330954348 mirna_pc |
| 26123 hsa-let-7d | POLE3    | 0.492302262 mirna_pc |
| 26124 hsa-let-7d | PPIH     | 0.310119964 mirna_pc |
| 26125 hsa-let-7d | GMPS     | 0.359875475 mirna_pc |
| 26126 hsa-let-7d | PPAT     | 0.356901183 mirna_pc |
| 26127 hsa-let-7d | DHX9     | 0.318736533 mirna_pc |
| 26128 hsa-let-7d | CCDC138  | 0.325304403 mirna_pc |
| 26129 hsa-let-7d | MRPL3    | 0.327550439 mirna_pc |
| 26130 hsa-let-7d | TSSC1    | 0.314943959 mirna_pc |
| 26131 hsa-let-7d | C20orf3  | 0.302271311 mirna_pc |
| 26132 hsa-let-7d | BOP 1.00 | 0.31491299 mirna_pc  |
| 26133 hsa-let-7d | POLA2    | 0.371840084 mirna_pc |
| 26134 hsa-let-7d | CCDC77   | 0.313774856 mirna_pc |
| 26135 hsa-let-7d | TEX10    | 0.471503815 mirna_pc |



|                  |          |                      |
|------------------|----------|----------------------|
| 26136 hsa-let-7d | SNRPA1   | 0.360451994 mirna_pc |
| 26137 hsa-let-7d | CCDC58   | 0.324936841 mirna_pc |
| 26138 hsa-let-7d | SKP2     | 0.390737769 mirna_pc |
| 26139 hsa-let-7d | TIPIN    | 0.409444229 mirna_pc |
| 26140 hsa-let-7d | ECE2     | 0.452286871 mirna_pc |
| 26141 hsa-let-7d | PTDSS1   | 0.351097343 mirna_pc |
| 26142 hsa-let-7d | RFC5     | 0.352394455 mirna_pc |
| 26143 hsa-let-7d | FANCG    | 0.321033642 mirna_pc |
| 26144 hsa-let-7d | MAZ      | 0.311213358 mirna_pc |
| 26145 hsa-let-7d | SSRP1    | 0.334419511 mirna_pc |
| 26146 hsa-let-7d | SNRPD3   | 0.369386375 mirna_pc |
| 26147 hsa-let-7d | GLA      | 0.331656545 mirna_pc |
| 26148 hsa-let-7d | KHDRBS1  | 0.370121369 mirna_pc |
| 26149 hsa-let-7d | C20orf27 | 0.412763357 mirna_pc |
| 26150 hsa-let-7d | LOC92659 | 0.360925358 mirna_pc |
| 26151 hsa-let-7d | TOMM34   | 0.423232839 mirna_pc |
| 26152 hsa-let-7d | CCDC21   | 0.387894252 mirna_pc |
| 26153 hsa-let-7d | RNF220   | 0.341779705 mirna_pc |
| 26154 hsa-let-7d | PRPF4    | 0.319167016 mirna_pc |
| 26155 hsa-let-7d | PYCRL    | 0.352727759 mirna_pc |
| 26156 hsa-let-7d | PARP1    | 0.31357951 mirna_pc  |
| 26157 hsa-let-7d | CCT7     | 0.368384389 mirna_pc |
| 26158 hsa-let-7d | MTERFD1  | 0.338189971 mirna_pc |
| 26159 hsa-let-7d | SNRNP40  | 0.41584797 mirna_pc  |
| 26160 hsa-let-7d | MED30    | 0.387606181 mirna_pc |
| 26161 hsa-let-7d | NOLC1    | 0.334872251 mirna_pc |
| 26162 hsa-let-7d | TMEM69   | 0.317510942 mirna_pc |
| 26163 hsa-let-7d | PSMA1    | 0.311192343 mirna_pc |
| 26164 hsa-let-7d | LIN9     | 0.302047743 mirna_pc |
| 26165 hsa-let-7d | WRAP53   | 0.350694587 mirna_pc |
| 26166 hsa-let-7d | NONO     | 0.345629993 mirna_pc |
| 26167 hsa-let-7d | CCDC86   | 0.372060125 mirna_pc |
| 26168 hsa-let-7d | QSOX2    | 0.390717839 mirna_pc |
| 26169 hsa-let-7d | PTMA     | 0.304085567 mirna_pc |
| 26170 hsa-let-7d | USP39    | 0.354189245 mirna_pc |
| 26171 hsa-let-7d | WDR76    | 0.348326916 mirna_pc |
| 26172 hsa-let-7d | LSM 4.00 | 0.406713032 mirna_pc |
| 26173 hsa-let-7d | EXOSC2   | 0.548677616 mirna_pc |
| 26174 hsa-let-7d | C11orf84 | 0.375057597 mirna_pc |
| 26175 hsa-let-7d | GSS      | 0.315513473 mirna_pc |
| 26176 hsa-let-7d | TOP1MT   | 0.309659795 mirna_pc |
| 26177 hsa-let-7d | TBCE     | 0.336546117 mirna_pc |
| 26178 hsa-let-7d | CLCN2    | 0.310000524 mirna_pc |
| 26179 hsa-let-7d | NCBP2    | 0.347981875 mirna_pc |
| 26180 hsa-let-7d | KLF16    | 0.311757277 mirna_pc |
| 26181 hsa-let-7d | RQCD1    | 0.306133042 mirna_pc |
| 26182 hsa-let-7d | DPY30    | 0.315653625 mirna_pc |
| 26183 hsa-let-7d | MTHFD2   | 0.336752495 mirna_pc |
| 26184 hsa-let-7d | RRP9     | 0.301780145 mirna_pc |
| 26185 hsa-let-7d | DDX31    | 0.374786528 mirna_pc |
| 26186 hsa-let-7d | DPH2     | 0.349232766 mirna_pc |
| 26187 hsa-let-7d | MTCH2    | 0.304638427 mirna_pc |
| 26188 hsa-let-7d | REXO4    | 0.416968669 mirna_pc |
| 26189 hsa-let-7d | MEN1     | 0.396291781 mirna_pc |

|                  |          |                      |
|------------------|----------|----------------------|
| 26190 hsa-let-7d | C17orf49 | 0.305670002 mirna_pc |
| 26191 hsa-let-7d | PN01     | 0.356498656 mirna_pc |
| 26192 hsa-let-7d | CCT4     | 0.370020262 mirna_pc |
| 26193 hsa-let-7d | SAC3D1   | 0.408077636 mirna_pc |
| 26194 hsa-let-7d | RABEPK   | 0.437071928 mirna_pc |
| 26195 hsa-let-7d | ELAVL1   | 0.381145248 mirna_pc |
| 26196 hsa-let-7d | MRPL4    | 0.359255014 mirna_pc |
| 26197 hsa-let-7d | CENPP    | 0.302922942 mirna_pc |
| 26198 hsa-let-7d | MTHFD1   | 0.306756951 mirna_pc |
| 26199 hsa-let-7d | NCAPD3   | 0.351600322 mirna_pc |
| 26200 hsa-let-7d | NAE1     | 0.339568662 mirna_pc |
| 26201 hsa-let-7d | GTF3C5   | 0.37342075 mirna_pc  |
| 26202 hsa-let-7d | PAK1IP1  | 0.341408656 mirna_pc |
| 26203 hsa-let-7d | SLC1A5   | 0.360085946 mirna_pc |
| 26204 hsa-let-7d | PSMB7    | 0.395544551 mirna_pc |
| 26205 hsa-let-7d | E2F4     | 0.301929843 mirna_pc |
| 26206 hsa-let-7d | PSMD2    | 0.348290443 mirna_pc |
| 26207 hsa-let-7d | YWHAE    | 0.373455621 mirna_pc |
| 26208 hsa-let-7d | DHFR     | 0.304192155 mirna_pc |
| 26209 hsa-let-7d | GLE1     | 0.450455664 mirna_pc |
| 26210 hsa-let-7d | WBSCR27  | 0.399765138 mirna_pc |
| 26211 hsa-let-7d | YARS2    | 0.320551631 mirna_pc |
| 26212 hsa-let-7d | PUF60    | 0.341595425 mirna_pc |
| 26213 hsa-let-7d | NUP205   | 0.319643726 mirna_pc |
| 26214 hsa-let-7d | DEK      | 0.339121959 mirna_pc |
| 26215 hsa-let-7d | SIX1     | 0.358697493 mirna_pc |
| 26216 hsa-let-7d | COMMD4   | 0.315726441 mirna_pc |
| 26217 hsa-let-7d | C14orf80 | 0.386542153 mirna_pc |
| 26218 hsa-let-7d | TKT      | 0.337873772 mirna_pc |
| 26219 hsa-let-7d | C7orf27  | 0.321746672 mirna_pc |
| 26220 hsa-let-7d | WDR74    | 0.302293087 mirna_pc |
| 26221 hsa-let-7d | PRDX1    | 0.300941068 mirna_pc |
| 26222 hsa-let-7d | SUV39H1  | 0.403369359 mirna_pc |
| 26223 hsa-let-7d | NUP188   | 0.407879297 mirna_pc |
| 26224 hsa-let-7d | RSRC1    | 0.317795957 mirna_pc |
| 26225 hsa-let-7d | C15orf23 | 0.45278165 mirna_pc  |
| 26226 hsa-let-7d | SDCCAG3  | 0.352035839 mirna_pc |
| 26227 hsa-let-7d | C1QBP    | 0.39604415 mirna_pc  |
| 26228 hsa-let-7d | MRPL17   | 0.33661752 mirna_pc  |
| 26229 hsa-let-7d | RAD23B   | 0.407654672 mirna_pc |
| 26230 hsa-let-7d | SPG21    | 0.410548652 mirna_pc |
| 26231 hsa-let-7d | CEP78    | 0.407293167 mirna_pc |
| 26232 hsa-let-7d | UCK1     | 0.333923452 mirna_pc |
| 26233 hsa-let-7d | VPS72    | 0.35170008 mirna_pc  |
| 26234 hsa-let-7d | GIT1     | 0.32460088 mirna_pc  |
| 26235 hsa-let-7d | SHMT2    | 0.362852299 mirna_pc |
| 26236 hsa-let-7d | HDAC2    | 0.322587016 mirna_pc |
| 26237 hsa-let-7d | MRPL12   | 0.346286897 mirna_pc |
| 26238 hsa-let-7d | HAUS2    | 0.316784826 mirna_pc |
| 26239 hsa-let-7d | MRPL11   | 0.315298842 mirna_pc |
| 26240 hsa-let-7d | AP2M1    | 0.324034055 mirna_pc |
| 26241 hsa-let-7d | C3orf34  | 0.307667863 mirna_pc |
| 26242 hsa-let-7d | PSMG1    | 0.345629744 mirna_pc |
| 26243 hsa-let-7d | PPP1R8   | 0.360461804 mirna_pc |

|                  |           |                      |
|------------------|-----------|----------------------|
| 26244 hsa-let-7d | ANKRD13B  | 0.347798284 mirna_pc |
| 26245 hsa-let-7d | NUDT3     | 0.3581128 mirna_pc   |
| 26246 hsa-let-7d | DOLPP1    | 0.425139035 mirna_pc |
| 26247 hsa-let-7d | RFC2      | 0.337903551 mirna_pc |
| 26248 hsa-let-7d | TAF5      | 0.356656892 mirna_pc |
| 26249 hsa-let-7d | FANCC     | 0.378719376 mirna_pc |
| 26250 hsa-let-7d | WDR5      | 0.505825308 mirna_pc |
| 26251 hsa-let-7d | HNRNPA1L2 | 0.330924136 mirna_pc |
| 26252 hsa-let-7d | MACROD1   | 0.359074201 mirna_pc |
| 26253 hsa-let-7d | MAN1B1    | 0.325761806 mirna_pc |
| 26254 hsa-let-7d | TMEM39B   | 0.302387142 mirna_pc |
| 26255 hsa-let-7d | RCCD1     | 0.390541474 mirna_pc |
| 26256 hsa-let-7d | TMEM161A  | 0.312642401 mirna_pc |
| 26257 hsa-let-7d | C9orf16   | 0.405345115 mirna_pc |
| 26258 hsa-let-7d | C1orf35   | 0.325158331 mirna_pc |
| 26259 hsa-let-7d | TMEM68    | 0.314137777 mirna_pc |
| 26260 hsa-let-7d | ZNF703    | 0.340816953 mirna_pc |
| 26261 hsa-let-7d | ZDHC12    | 0.364940015 mirna_pc |
| 26262 hsa-let-7d | SNAPC4    | 0.322966438 mirna_pc |
| 26263 hsa-let-7d | C15orf44  | 0.359860684 mirna_pc |
| 26264 hsa-let-7d | TMEM44    | 0.386315571 mirna_pc |
| 26265 hsa-let-7d | FARSB     | 0.317145455 mirna_pc |
| 26266 hsa-let-7d | ERI3      | 0.370006517 mirna_pc |
| 26267 hsa-let-7d | MED27     | 0.409153059 mirna_pc |
| 26268 hsa-let-7d | TOMM22    | 0.305271585 mirna_pc |
| 26269 hsa-let-7d | PHB       | 0.336103902 mirna_pc |
| 26270 hsa-let-7d | C12orf52  | 0.309142501 mirna_pc |
| 26271 hsa-let-7d | C8orf30A  | 0.354728965 mirna_pc |
| 26272 hsa-let-7d | MUTYH     | 0.420862146 mirna_pc |
| 26273 hsa-let-7d | WRNIP1    | 0.349880487 mirna_pc |
| 26274 hsa-let-7d | LOC441089 | 0.368307015 mirna_pc |
| 26275 hsa-let-7d | MRRF      | 0.339152502 mirna_pc |
| 26276 hsa-let-7d | ADSL      | 0.308538835 mirna_pc |
| 26277 hsa-let-7d | VRK1      | 0.320569192 mirna_pc |
| 26278 hsa-let-7d | FPGS      | 0.423063212 mirna_pc |
| 26279 hsa-let-7d | ANP32B    | 0.424704258 mirna_pc |
| 26280 hsa-let-7d | UNG       | 0.359698142 mirna_pc |
| 26281 hsa-let-7d | GRK6      | 0.330233909 mirna_pc |
| 26282 hsa-let-7d | CDK16     | 0.367407663 mirna_pc |
| 26283 hsa-let-7d | ALKBH2    | 0.319797274 mirna_pc |
| 26284 hsa-let-7d | TOR1A     | 0.334660444 mirna_pc |
| 26285 hsa-let-7d | PYCR2     | 0.340362428 mirna_pc |
| 26286 hsa-let-7d | DAP3      | 0.302912435 mirna_pc |
| 26287 hsa-let-7d | CCDC90A   | 0.302515229 mirna_pc |
| 26288 hsa-let-7d | SIGMAR1   | 0.362163025 mirna_pc |
| 26289 hsa-let-7d | RPL39L    | 0.321325607 mirna_pc |
| 26290 hsa-let-7d | ACD       | 0.321286443 mirna_pc |
| 26291 hsa-let-7d | GPN3      | 0.326162677 mirna_pc |
| 26292 hsa-let-7d | RPUSD1    | 0.313366449 mirna_pc |
| 26293 hsa-let-7d | LOC152217 | 0.392506784 mirna_pc |
| 26294 hsa-let-7d | PTGES2    | 0.460676388 mirna_pc |
| 26295 hsa-let-7d | MRPL37    | 0.341593491 mirna_pc |
| 26296 hsa-let-7d | EIF3I     | 0.326614184 mirna_pc |
| 26297 hsa-let-7d | RPL12     | 0.391487562 mirna_pc |

|                  |              |                      |
|------------------|--------------|----------------------|
| 26298 hsa-let-7d | C9orf89      | 0.329964639 mirna_pc |
| 26299 hsa-let-7d | ZMYND19      | 0.445509572 mirna_pc |
| 26300 hsa-let-7d | NDUFA8       | 0.368154021 mirna_pc |
| 26301 hsa-let-7d | TRAP1        | 0.325518043 mirna_pc |
| 26302 hsa-let-7d | MAGEF1       | 0.348139516 mirna_pc |
| 26303 hsa-let-7d | PSAT1        | 0.331540798 mirna_pc |
| 26304 hsa-let-7d | C15orf63     | 0.348767706 mirna_pc |
| 26305 hsa-let-7d | RPL30        | 0.322320329 mirna_pc |
| 26306 hsa-let-7d | PCGF6        | 0.343580997 mirna_pc |
| 26307 hsa-let-7d | SURF2        | 0.388187641 mirna_pc |
| 26308 hsa-let-7d | METTL11A     | 0.479033928 mirna_pc |
| 26309 hsa-let-7d | APOA1BP      | 0.343670199 mirna_pc |
| 26310 hsa-let-7d | ZNF511       | 0.368567432 mirna_pc |
| 26311 hsa-let-7d | MRPS5        | 0.322402505 mirna_pc |
| 26312 hsa-let-7d | SMARCB1      | 0.346473588 mirna_pc |
| 26313 hsa-let-7d | CCT8         | 0.323941457 mirna_pc |
| 26314 hsa-let-7d | RPA1         | 0.364193987 mirna_pc |
| 26315 hsa-let-7d | ZNF639       | 0.357636293 mirna_pc |
| 26316 hsa-let-7d | TIGD5        | 0.30399929 mirna_pc  |
| 26317 hsa-let-7d | SLC25A17     | 0.302809453 mirna_pc |
| 26318 hsa-let-7d | RPS7         | 0.30422684 mirna_pc  |
| 26319 hsa-let-7d | FAM189B      | 0.319880412 mirna_pc |
| 26320 hsa-let-7d | LRPPRC       | 0.336481972 mirna_pc |
| 26321 hsa-let-7d | CLNS1A       | 0.30352913 mirna_pc  |
| 26322 hsa-let-7d | STRA13       | 0.325121537 mirna_pc |
| 26323 hsa-let-7d | RPL35        | 0.370371209 mirna_pc |
| 26324 hsa-let-7d | RRP7A        | 0.32041325 mirna_pc  |
| 26325 hsa-let-7d | TIMM16       | 0.329993345 mirna_pc |
| 26326 hsa-let-7d | DVL2         | 0.300214567 mirna_pc |
| 26327 hsa-let-7d | FRAT2        | 0.3090401 mirna_pc   |
| 26328 hsa-let-7d | LOC100289341 | 0.328400726 mirna_pc |
| 26329 hsa-let-7d | SNHG6        | 0.347667185 mirna_pc |
| 26330 hsa-let-7d | GCAT         | 0.306435186 mirna_pc |
| 26331 hsa-let-7d | TATDN1       | 0.344259241 mirna_pc |
| 26332 hsa-let-7d | ARHGAP19     | 0.300614677 mirna_pc |
| 26333 hsa-let-7d | RPL8         | 0.343407114 mirna_pc |
| 26334 hsa-let-7d | ADO          | 0.322546567 mirna_pc |
| 26335 hsa-let-7d | SURF6        | 0.464201409 mirna_pc |
| 26336 hsa-let-7d | NLE1         | 0.337534017 mirna_pc |
| 26337 hsa-let-7d | FXR1         | 0.342286438 mirna_pc |
| 26338 hsa-let-7d | WDR85        | 0.309191943 mirna_pc |
| 26339 hsa-let-7d | TRMT61B      | 0.301290149 mirna_pc |
| 26340 hsa-let-7d | GANAB        | 0.301775911 mirna_pc |
| 26341 hsa-let-7d | MPV17        | 0.390704632 mirna_pc |
| 26342 hsa-let-7d | RMI1         | 0.346069236 mirna_pc |
| 26343 hsa-let-7d | MRPS2        | 0.49690658 mirna_pc  |
| 26344 hsa-let-7d | PIGX         | 0.333388606 mirna_pc |
| 26345 hsa-let-7d | HTRA2        | 0.301305486 mirna_pc |
| 26346 hsa-let-7d | PFN2         | 0.327541704 mirna_pc |
| 26347 hsa-let-7d | COPZ1        | 0.318871165 mirna_pc |
| 26348 hsa-let-7d | MRPL24       | 0.330190437 mirna_pc |
| 26349 hsa-let-7d | DRG1         | 0.392835868 mirna_pc |
| 26350 hsa-let-7d | NOL7         | 0.348734858 mirna_pc |
| 26351 hsa-let-7d | SENP3        | 0.33945024 mirna_pc  |

|                  |           |                      |
|------------------|-----------|----------------------|
| 26352 hsa-let-7d | PSMD5     | 0.313965202 mirna_pc |
| 26353 hsa-let-7d | B4GALT3   | 0.307645193 mirna_pc |
| 26354 hsa-let-7d | DEPDC7    | 0.302303221 mirna_pc |
| 26355 hsa-let-7d | C9orf114  | 0.480919126 mirna_pc |
| 26356 hsa-let-7d | SLC19A1   | 0.336838546 mirna_pc |
| 26357 hsa-let-7d | TTC27     | 0.304407258 mirna_pc |
| 26358 hsa-let-7d | PDCL      | 0.372583407 mirna_pc |
| 26359 hsa-let-7d | FIBP      | 0.346010372 mirna_pc |
| 26360 hsa-let-7d | AAAS      | 0.341145768 mirna_pc |
| 26361 hsa-let-7d | INPP5E    | 0.318813978 mirna_pc |
| 26362 hsa-let-7d | C9orf6    | 0.367166947 mirna_pc |
| 26363 hsa-let-7d | MTFMT     | 0.400288579 mirna_pc |
| 26364 hsa-let-7d | MRPS26    | 0.329579355 mirna_pc |
| 26365 hsa-let-7d | C9orf78   | 0.338326613 mirna_pc |
| 26366 hsa-let-7d | MRPL30    | 0.319863099 mirna_pc |
| 26367 hsa-let-7d | TALD01    | 0.328986379 mirna_pc |
| 26368 hsa-let-7d | PYCR1     | 0.414625653 mirna_pc |
| 26369 hsa-let-7d | DHODH     | 0.31081607 mirna_pc  |
| 26370 hsa-let-7d | PKN3      | 0.331225589 mirna_pc |
| 26371 hsa-let-7d | AKR7A2    | 0.336245757 mirna_pc |
| 26372 hsa-let-7d | TRUB2     | 0.306504014 mirna_pc |
| 26373 hsa-let-7d | C18orf10  | 0.330249479 mirna_pc |
| 26374 hsa-let-7d | PEX10     | 0.304706136 mirna_pc |
| 26375 hsa-let-7d | C9orf119  | 0.353440177 mirna_pc |
| 26376 hsa-let-7d | MRPS16    | 0.336557285 mirna_pc |
| 26377 hsa-let-7d | PFAS      | 0.332322338 mirna_pc |
| 26378 hsa-let-7d | ENDOG     | 0.38307533 mirna_pc  |
| 26379 hsa-let-7d | C10orf35  | 0.303472085 mirna_pc |
| 26380 hsa-let-7d | RPL7      | 0.333547578 mirna_pc |
| 26381 hsa-let-7d | SNUPN     | 0.325144244 mirna_pc |
| 26382 hsa-let-7d | UHL5      | 0.301666904 mirna_pc |
| 26383 hsa-let-7d | HSF1      | 0.326796844 mirna_pc |
| 26384 hsa-let-7d | RPUSD2    | 0.339735458 mirna_pc |
| 26385 hsa-let-7d | ABCF3     | 0.319782889 mirna_pc |
| 26386 hsa-let-7d | PHF19     | 0.303840999 mirna_pc |
| 26387 hsa-let-7d | NIPSNAP1  | 0.383310087 mirna_pc |
| 26388 hsa-let-7d | PARL      | 0.344748902 mirna_pc |
| 26389 hsa-let-7d | PIR       | 0.353275401 mirna_pc |
| 26390 hsa-let-7d | PCCB      | 0.309448724 mirna_pc |
| 26391 hsa-let-7d | CHCHD1    | 0.309141193 mirna_pc |
| 26392 hsa-let-7d | PPP6C     | 0.305068167 mirna_pc |
| 26393 hsa-let-7d | SPA17     | 0.304860323 mirna_pc |
| 26394 hsa-let-7d | RPL35A    | 0.385368775 mirna_pc |
| 26395 hsa-let-7d | ARL 2.00  | 0.363225456 mirna_pc |
| 26396 hsa-let-7d | C9orf86   | 0.328474081 mirna_pc |
| 26397 hsa-let-7d | FBRSL1    | 0.317456049 mirna_pc |
| 26398 hsa-let-7d | PTRH1     | 0.40150583 mirna_pc  |
| 26399 hsa-let-7d | COBRA1    | 0.422340861 mirna_pc |
| 26400 hsa-let-7d | MRPS11    | 0.312340736 mirna_pc |
| 26401 hsa-let-7d | MRPL50    | 0.384893282 mirna_pc |
| 26402 hsa-let-7d | YBX1      | 0.369576042 mirna_pc |
| 26403 hsa-let-7d | ZBTB80S   | 0.307227731 mirna_pc |
| 26404 hsa-let-7d | MTP 18.00 | 0.306265686 mirna_pc |
| 26405 hsa-let-7d | C12orf10  | 0.300523005 mirna_pc |

|                  |          |                      |
|------------------|----------|----------------------|
| 26406 hsa-let-7d | SEPHS1   | 0.345591139 mirna_pc |
| 26407 hsa-let-7d | GPX4     | 0.304651622 mirna_pc |
| 26408 hsa-let-7d | TMEM183A | 0.369434994 mirna_pc |
| 26409 hsa-let-7d | PHB2     | 0.345398768 mirna_pc |
| 26410 hsa-let-7d | C8orf33  | 0.397282443 mirna_pc |
| 26411 hsa-let-7d | RPS17    | 0.303576229 mirna_pc |
| 26412 hsa-let-7d | POLR2F   | 0.362354861 mirna_pc |
| 26413 hsa-let-7d | PSMG4    | 0.33434267 mirna_pc  |
| 26414 hsa-let-7d | MDH2     | 0.331377372 mirna_pc |
| 26415 hsa-let-7d | SSNA1    | 0.377797714 mirna_pc |
| 26416 hsa-let-7d | MRPS15   | 0.304857106 mirna_pc |
| 26417 hsa-let-7d | NARS2    | 0.322977797 mirna_pc |
| 26418 hsa-let-7d | TMEM14C  | 0.310743763 mirna_pc |
| 26419 hsa-let-7d | TXNRD1   | 0.30621475 mirna_pc  |
| 26420 hsa-let-7d | UBQLN1   | 0.326321632 mirna_pc |
| 26421 hsa-let-7d | AIFM2    | 0.302909088 mirna_pc |
| 26422 hsa-let-7d | DOLK     | 0.316898925 mirna_pc |
| 26423 hsa-let-7d | USP21    | 0.362326372 mirna_pc |
| 26424 hsa-let-7d | SLC25A11 | 0.302734574 mirna_pc |
| 26425 hsa-let-7d | KLHL12   | 0.307419265 mirna_pc |
| 26426 hsa-let-7d | ANP32A   | 0.333749665 mirna_pc |
| 26427 hsa-let-7d | C9orf80  | 0.345534617 mirna_pc |
| 26428 hsa-let-7d | SUPV3L1  | 0.417938798 mirna_pc |
| 26429 hsa-let-7d | NELF     | 0.35316891 mirna_pc  |
| 26430 hsa-let-7d | C17orf81 | 0.348212548 mirna_pc |
| 26431 hsa-let-7d | FXN      | 0.322952133 mirna_pc |
| 26432 hsa-let-7d | HYLS1    | 0.316304434 mirna_pc |
| 26433 hsa-let-7d | URM1     | 0.370613764 mirna_pc |
| 26434 hsa-let-7d | MGC70857 | 0.315847293 mirna_pc |
| 26435 hsa-let-7d | CHCHD3   | 0.35443418 mirna_pc  |
| 26436 hsa-let-7d | TFDP2    | 0.31684236 mirna_pc  |
| 26437 hsa-let-7d | C15orf40 | 0.325957352 mirna_pc |
| 26438 hsa-let-7d | PMPCA    | 0.308119402 mirna_pc |
| 26439 hsa-let-7d | C12orf24 | 0.320728027 mirna_pc |
| 26440 hsa-let-7d | FKBP4    | 0.31142665 mirna_pc  |
| 26441 hsa-let-7d | RPS5     | 0.311531032 mirna_pc |
| 26442 hsa-let-7d | THNSL1   | 0.303252191 mirna_pc |
| 26443 hsa-let-7d | BCS1L    | 0.32981264 mirna_pc  |
| 26444 hsa-let-7d | PPP2R4   | 0.411821766 mirna_pc |
| 26445 hsa-let-7d | C1orf43  | 0.344451649 mirna_pc |
| 26446 hsa-let-7d | TMEM203  | 0.33075373 mirna_pc  |
| 26447 hsa-let-7d | CYC1     | 0.399515705 mirna_pc |
| 26448 hsa-let-7d | SOD1     | 0.383979312 mirna_pc |
| 26449 hsa-let-7d | THAP4    | 0.310150539 mirna_pc |
| 26450 hsa-let-7d | PTPMT1   | 0.306895044 mirna_pc |
| 26451 hsa-let-7d | C9orf37  | 0.300195923 mirna_pc |
| 26452 hsa-let-7d | TCTN3    | 0.314194837 mirna_pc |
| 26453 hsa-let-7d | RMRP     | 0.30927029 mirna_pc  |
| 26454 hsa-let-7d | SIX2     | 0.31181593 mirna_pc  |
| 26455 hsa-let-7d | PDXP     | 0.364783868 mirna_pc |
| 26456 hsa-let-7d | COX7A2L  | 0.31036857 mirna_pc  |
| 26457 hsa-let-7d | CHID1    | 0.356390526 mirna_pc |
| 26458 hsa-let-7d | IARS     | 0.379162438 mirna_pc |
| 26459 hsa-let-7d | ACP1     | 0.335500873 mirna_pc |

|                    |              |                      |
|--------------------|--------------|----------------------|
| 26460 hsa-let-7d   | DNAL4        | 0.310387385 mirna_pc |
| 26461 hsa-let-7d   | CD320        | 0.326078603 mirna_pc |
| 26462 hsa-let-7d   | SNRNP25      | 0.341869158 mirna_pc |
| 26463 hsa-let-7d   | NAA35        | 0.314081732 mirna_pc |
| 26464 hsa-let-7d   | RPL7A        | 0.355993231 mirna_pc |
| 26465 hsa-let-7d   | GPAA1        | 0.30048748 mirna_pc  |
| 26466 hsa-let-7d   | NCRNA00188   | 0.333478372 mirna_pc |
| 26467 hsa-let-7d   | MAF 1.00     | 0.345722346 mirna_pc |
| 26468 hsa-let-7d   | BAT2L1       | 0.353466507 mirna_pc |
| 26469 hsa-let-7d   | UBL7         | 0.307770969 mirna_pc |
| 26470 hsa-let-7d   | TMEM14B      | 0.342035027 mirna_pc |
| 26471 hsa-let-7d   | SNAPC5       | 0.3126906 mirna_pc   |
| 26472 hsa-let-7d   | CIZ1         | 0.432314067 mirna_pc |
| 26473 hsa-let-7d   | NDNL2        | 0.304091414 mirna_pc |
| 26474 hsa-let-7d   | NQO2         | 0.319427707 mirna_pc |
| 26475 hsa-let-7d   | MAFG         | 0.360127536 mirna_pc |
| 26476 hsa-let-7d   | MED22        | 0.356684629 mirna_pc |
| 26477 hsa-let-7d   | SCARNA2      | 0.301970073 mirna_pc |
| 26478 hsa-let-7d   | DPM2         | 0.41454802 mirna_pc  |
| 26479 hsa-let-7d   | C10orf75     | 0.355787782 mirna_pc |
| 26480 hsa-let-7d   | AP00         | 0.349693645 mirna_pc |
| 26481 hsa-let-7d   | C15orf61     | 0.325553828 mirna_pc |
| 26482 hsa-mir-450b | MAD2L1       | 0.310835063 mirna_pc |
| 26483 hsa-mir-450b | NUF2         | 0.339586481 mirna_pc |
| 26484 hsa-mir-450b | BIRC5        | 0.34443125 mirna_pc  |
| 26485 hsa-mir-450b | C1orf112     | 0.307667492 mirna_pc |
| 26486 hsa-mir-450b | ACTL6A       | 0.30005602 mirna_pc  |
| 26487 hsa-mir-450b | CENPO        | 0.332858884 mirna_pc |
| 26488 hsa-mir-450b | CENPL        | 0.361962565 mirna_pc |
| 26489 hsa-mir-450b | MSH2         | 0.327538026 mirna_pc |
| 26490 hsa-mir-450b | DBF4         | 0.314815737 mirna_pc |
| 26491 hsa-mir-450b | PSMB4        | 0.315703176 mirna_pc |
| 26492 hsa-mir-450b | RFC4         | 0.319726365 mirna_pc |
| 26493 hsa-mir-450b | DNAJB11      | 0.308889536 mirna_pc |
| 26494 hsa-mir-450b | SSBP3        | 0.307248253 mirna_pc |
| 26495 hsa-mir-450b | LOC100128191 | 0.332537544 mirna_pc |
| 26496 hsa-mir-450b | MTL 5.00     | 0.335027395 mirna_pc |
| 26497 hsa-mir-450b | PSMC2        | 0.314067146 mirna_pc |
| 26498 hsa-mir-450b | GORAB        | 0.335904817 mirna_pc |
| 26499 hsa-mir-450b | SHOX2        | 0.322468635 mirna_pc |
| 26500 hsa-mir-450b | DUSP9        | 0.307373047 mirna_pc |
| 26501 hsa-mir-450b | PSMD2        | 0.306638342 mirna_pc |
| 26502 hsa-mir-450b | PRAME        | 0.393953603 mirna_pc |
| 26503 hsa-mir-450b | TRA2B        | 0.301077685 mirna_pc |
| 26504 hsa-mir-450b | RSRC1        | 0.327824319 mirna_pc |
| 26505 hsa-mir-450b | C3orf21      | 0.364854773 mirna_pc |
| 26506 hsa-mir-450b | CPXM1        | 0.305719369 mirna_pc |
| 26507 hsa-mir-450b | PLEKHG4      | 0.329994559 mirna_pc |
| 26508 hsa-mir-450b | TTC17        | 0.33155 mirna_pc     |
| 26509 hsa-mir-450b | CADM1        | 0.388647402 mirna_pc |
| 26510 hsa-mir-450b | MSH6         | 0.304077414 mirna_pc |
| 26511 hsa-mir-450b | C3orf34      | 0.333108016 mirna_pc |
| 26512 hsa-mir-450b | LEF1         | 0.338716278 mirna_pc |
| 26513 hsa-mir-450b | KREMEN2      | 0.327131907 mirna_pc |

|                     |           |                      |
|---------------------|-----------|----------------------|
| 26514 hsa-mir-450b  | MEX3A     | 0.344523934 mirna_pc |
| 26515 hsa-mir-450b  | MOGS      | 0.335372072 mirna_pc |
| 26516 hsa-mir-450b  | IRAK1BP1  | 0.327022224 mirna_pc |
| 26517 hsa-mir-450b  | NOL10     | 0.317313259 mirna_pc |
| 26518 hsa-mir-450b  | ZKSCAN2   | 0.307413903 mirna_pc |
| 26519 hsa-mir-450b  | RPL39L    | 0.332339724 mirna_pc |
| 26520 hsa-mir-450b  | MEMO1     | 0.32542131 mirna_pc  |
| 26521 hsa-mir-450b  | IGSF9     | 0.362866378 mirna_pc |
| 26522 hsa-mir-450b  | UBXN2A    | 0.300534427 mirna_pc |
| 26523 hsa-mir-450b  | MAGEF1    | 0.356795235 mirna_pc |
| 26524 hsa-mir-450b  | ZNF639    | 0.302552119 mirna_pc |
| 26525 hsa-mir-450b  | DVL3      | 0.322096038 mirna_pc |
| 26526 hsa-mir-450b  | TRPA1     | 0.345279958 mirna_pc |
| 26527 hsa-mir-450b  | RDH14     | 0.301364542 mirna_pc |
| 26528 hsa-mir-450b  | PIGX      | 0.322688095 mirna_pc |
| 26529 hsa-mir-450b  | ATP6V1E2  | 0.356234896 mirna_pc |
| 26530 hsa-mir-450b  | E2F6      | 0.330441058 mirna_pc |
| 26531 hsa-mir-450b  | HUNK      | 0.33382807 mirna_pc  |
| 26532 hsa-mir-450b  | SCLY      | 0.345806309 mirna_pc |
| 26533 hsa-mir-450b  | SLC4A1AP  | 0.321441745 mirna_pc |
| 26534 hsa-mir-450b  | DHX57     | 0.301972 mirna_pc    |
| 26535 hsa-mir-450b  | ALX3      | 0.364343119 mirna_pc |
| 26536 hsa-mir-450b  | EXT2      | 0.323951893 mirna_pc |
| 26537 hsa-mir-450b  | EXTL2     | 0.333802436 mirna_pc |
| 26538 hsa-mir-450b  | SEPHS1    | 0.300386295 mirna_pc |
| 26539 hsa-mir-450b  | SHISA2    | 0.305867671 mirna_pc |
| 26540 hsa-mir-450b  | MLLT11    | 0.314546809 mirna_pc |
| 26541 hsa-mir-450b  | MYCN      | 0.341986015 mirna_pc |
| 26542 hsa-mir-450b  | PABPC4L   | 0.352101507 mirna_pc |
| 26543 hsa-mir-450b  | MSI1      | 0.324681085 mirna_pc |
| 26544 hsa-mir-450b  | TRO       | 0.300672368 mirna_pc |
| 26545 hsa-mir-450b  | C2orf3    | 0.315342607 mirna_pc |
| 26546 hsa-mir-450b  | LRDD      | 0.331401893 mirna_pc |
| 26547 hsa-mir-450b  | ETV5      | 0.301049856 mirna_pc |
| 26548 hsa-mir-450b  | DDX1      | 0.322663971 mirna_pc |
| 26549 hsa-mir-450b  | IGHMBP2   | 0.304294535 mirna_pc |
| 26550 hsa-mir-450b  | ACP1      | 0.310228246 mirna_pc |
| 26551 hsa-mir-450b  | FZD1      | 0.315397778 mirna_pc |
| 26552 hsa-mir-450b  | C2orf28   | 0.306784686 mirna_pc |
| 26553 hsa-mir-450b  | H2AFY2    | 0.344463061 mirna_pc |
| 26554 hsa-mir-450b  | FBX048    | 0.315187517 mirna_pc |
| 26555 hsa-mir-450b  | TRIL      | 0.304548252 mirna_pc |
| 26556 hsa-mir-450b  | DNMT3A    | 0.366133622 mirna_pc |
| 26557 hsa-mir-92a-1 | TOP2A     | 0.441652356 mirna_pc |
| 26558 hsa-mir-92a-1 | CENPF     | 0.302197949 mirna_pc |
| 26559 hsa-mir-92a-1 | CKAP2     | 0.319499816 mirna_pc |
| 26560 hsa-mir-92a-1 | FANCA     | 0.387544074 mirna_pc |
| 26561 hsa-mir-92a-1 | SGOL1     | 0.34452498 mirna_pc  |
| 26562 hsa-mir-92a-1 | ARHGAP11A | 0.319585362 mirna_pc |
| 26563 hsa-mir-92a-1 | NEK2      | 0.321270347 mirna_pc |
| 26564 hsa-mir-92a-1 | GTSE1     | 0.308550235 mirna_pc |
| 26565 hsa-mir-92a-1 | MAD2L1    | 0.314942729 mirna_pc |
| 26566 hsa-mir-92a-1 | TIMELESS  | 0.305856102 mirna_pc |
| 26567 hsa-mir-92a-1 | XPO1      | 0.362161826 mirna_pc |



|                     |           |                      |
|---------------------|-----------|----------------------|
| 26568 hsa-mir-92a-1 | PLK4      | 0.314956992 mirna_pc |
| 26569 hsa-mir-92a-1 | FANCB     | 0.31351961 mirna_pc  |
| 26570 hsa-mir-92a-1 | SKA3      | 0.388320596 mirna_pc |
| 26571 hsa-mir-92a-1 | HJURP     | 0.343117636 mirna_pc |
| 26572 hsa-mir-92a-1 | BLM       | 0.366649615 mirna_pc |
| 26573 hsa-mir-92a-1 | PAICS     | 0.337652388 mirna_pc |
| 26574 hsa-mir-92a-1 | CCDC150   | 0.33543615 mirna_pc  |
| 26575 hsa-mir-92a-1 | EME1      | 0.312398343 mirna_pc |
| 26576 hsa-mir-92a-1 | CENPK     | 0.315991484 mirna_pc |
| 26577 hsa-mir-92a-1 | CENPE     | 0.302445527 mirna_pc |
| 26578 hsa-mir-92a-1 | C1orf112  | 0.303065075 mirna_pc |
| 26579 hsa-mir-92a-1 | GINS1     | 0.343917991 mirna_pc |
| 26580 hsa-mir-92a-1 | TRAIP     | 0.30023605 mirna_pc  |
| 26581 hsa-mir-92a-1 | EZH2      | 0.320034666 mirna_pc |
| 26582 hsa-mir-92a-1 | POLD1     | 0.305997781 mirna_pc |
| 26583 hsa-mir-92a-1 | C12orf48  | 0.318174703 mirna_pc |
| 26584 hsa-mir-92a-1 | HELLS     | 0.311034017 mirna_pc |
| 26585 hsa-mir-92a-1 | TCF3      | 0.304484019 mirna_pc |
| 26586 hsa-mir-92a-1 | C6orf167  | 0.312823177 mirna_pc |
| 26587 hsa-mir-92a-1 | BRCA1     | 0.371063521 mirna_pc |
| 26588 hsa-mir-92a-1 | HNRNPA2B1 | 0.308223028 mirna_pc |
| 26589 hsa-mir-92a-1 | MCM6      | 0.346185526 mirna_pc |
| 26590 hsa-mir-92a-1 | CDC6      | 0.394507226 mirna_pc |
| 26591 hsa-mir-92a-1 | CDCA7     | 0.370673318 mirna_pc |
| 26592 hsa-mir-92a-1 | BRIP1     | 0.319364284 mirna_pc |
| 26593 hsa-mir-92a-1 | DCAF13    | 0.317183141 mirna_pc |
| 26594 hsa-mir-92a-1 | ATAD5     | 0.354571721 mirna_pc |
| 26595 hsa-mir-92a-1 | RFC3      | 0.420259774 mirna_pc |
| 26596 hsa-mir-92a-1 | CENPO     | 0.319703137 mirna_pc |
| 26597 hsa-mir-92a-1 | XRCC2     | 0.319825784 mirna_pc |
| 26598 hsa-mir-92a-1 | BRCA2     | 0.364308729 mirna_pc |
| 26599 hsa-mir-92a-1 | GEN1      | 0.427200712 mirna_pc |
| 26600 hsa-mir-92a-1 | HMGB2     | 0.344352609 mirna_pc |
| 26601 hsa-mir-92a-1 | DNA2      | 0.353794255 mirna_pc |
| 26602 hsa-mir-92a-1 | NOP56     | 0.329288186 mirna_pc |
| 26603 hsa-mir-92a-1 | DLEU2     | 0.341016791 mirna_pc |
| 26604 hsa-mir-92a-1 | PRIM1     | 0.361887426 mirna_pc |
| 26605 hsa-mir-92a-1 | FERMT1    | 0.364913965 mirna_pc |
| 26606 hsa-mir-92a-1 | MSH2      | 0.360610609 mirna_pc |
| 26607 hsa-mir-92a-1 | CDC7      | 0.348783187 mirna_pc |
| 26608 hsa-mir-92a-1 | SSB       | 0.37669 mirna_pc     |
| 26609 hsa-mir-92a-1 | PUS1      | 0.302042113 mirna_pc |
| 26610 hsa-mir-92a-1 | NOL11     | 0.330122812 mirna_pc |
| 26611 hsa-mir-92a-1 | FBX05     | 0.328602776 mirna_pc |
| 26612 hsa-mir-92a-1 | E2F3      | 0.445003062 mirna_pc |
| 26613 hsa-mir-92a-1 | CDC25A    | 0.341446124 mirna_pc |
| 26614 hsa-mir-92a-1 | DDX12     | 0.306438914 mirna_pc |
| 26615 hsa-mir-92a-1 | C13orf34  | 0.426120061 mirna_pc |
| 26616 hsa-mir-92a-1 | MCM8      | 0.394038977 mirna_pc |
| 26617 hsa-mir-92a-1 | ATIC      | 0.375007029 mirna_pc |
| 26618 hsa-mir-92a-1 | CBX8      | 0.353337006 mirna_pc |
| 26619 hsa-mir-92a-1 | GNPDA1    | 0.312161308 mirna_pc |
| 26620 hsa-mir-92a-1 | NCL       | 0.362912451 mirna_pc |
| 26621 hsa-mir-92a-1 | C13orf37  | 0.340810332 mirna_pc |

|       |               |          |             |          |
|-------|---------------|----------|-------------|----------|
| 26622 | hsa-mir-92a-1 | PNPT1    | 0.386448708 | mirna_pc |
| 26623 | hsa-mir-92a-1 | TMP0     | 0.350621577 | mirna_pc |
| 26624 | hsa-mir-92a-1 | DHX9     | 0.314004767 | mirna_pc |
| 26625 | hsa-mir-92a-1 | SFRS1    | 0.451640979 | mirna_pc |
| 26626 | hsa-mir-92a-1 | WDR43    | 0.337326696 | mirna_pc |
| 26627 | hsa-mir-92a-1 | C4orf46  | 0.327152678 | mirna_pc |
| 26628 | hsa-mir-92a-1 | DARS2    | 0.321427037 | mirna_pc |
| 26629 | hsa-mir-92a-1 | HSPD1    | 0.307683054 | mirna_pc |
| 26630 | hsa-mir-92a-1 | POLR2D   | 0.320135871 | mirna_pc |
| 26631 | hsa-mir-92a-1 | KHDRBS1  | 0.313398722 | mirna_pc |
| 26632 | hsa-mir-92a-1 | SLC5A6   | 0.310447211 | mirna_pc |
| 26633 | hsa-mir-92a-1 | PRPF40A  | 0.358226437 | mirna_pc |
| 26634 | hsa-mir-92a-1 | CCDC18   | 0.300189204 | mirna_pc |
| 26635 | hsa-mir-92a-1 | TMEM194A | 0.306086383 | mirna_pc |
| 26636 | hsa-mir-92a-1 | SLC39A10 | 0.335019273 | mirna_pc |
| 26637 | hsa-mir-92a-1 | ZNF695   | 0.340853659 | mirna_pc |
| 26638 | hsa-mir-92a-1 | PDSS1    | 0.340833025 | mirna_pc |
| 26639 | hsa-mir-92a-1 | HAUS6    | 0.342242888 | mirna_pc |
| 26640 | hsa-mir-92a-1 | CENPJ    | 0.391567281 | mirna_pc |
| 26641 | hsa-mir-92a-1 | HNRNPU   | 0.332721779 | mirna_pc |
| 26642 | hsa-mir-92a-1 | POLR1B   | 0.306265432 | mirna_pc |
| 26643 | hsa-mir-92a-1 | QSOX2    | 0.303733066 | mirna_pc |
| 26644 | hsa-mir-92a-1 | SCARB1   | 0.329995348 | mirna_pc |
| 26645 | hsa-mir-92a-1 | SUV39H2  | 0.302214495 | mirna_pc |
| 26646 | hsa-mir-92a-1 | FANCL    | 0.358719087 | mirna_pc |
| 26647 | hsa-mir-92a-1 | HNRNPD   | 0.32272358  | mirna_pc |
| 26648 | hsa-mir-92a-1 | MTHFD2   | 0.319859625 | mirna_pc |
| 26649 | hsa-mir-92a-1 | DDX31    | 0.304135209 | mirna_pc |
| 26650 | hsa-mir-92a-1 | POP1     | 0.347520548 | mirna_pc |
| 26651 | hsa-mir-92a-1 | NUDT15   | 0.333936109 | mirna_pc |
| 26652 | hsa-mir-92a-1 | SLM02    | 0.319023137 | mirna_pc |
| 26653 | hsa-mir-92a-1 | NAA25    | 0.307577528 | mirna_pc |
| 26654 | hsa-mir-92a-1 | ILF3     | 0.323322159 | mirna_pc |
| 26655 | hsa-mir-92a-1 | DEK      | 0.316342577 | mirna_pc |
| 26656 | hsa-mir-92a-1 | TBC1D4   | 0.332841349 | mirna_pc |
| 26657 | hsa-mir-92a-1 | TRIB3    | 0.416354063 | mirna_pc |
| 26658 | hsa-mir-92a-1 | PASK     | 0.360404783 | mirna_pc |
| 26659 | hsa-mir-92a-1 | TGS1     | 0.323061836 | mirna_pc |
| 26660 | hsa-mir-92a-1 | HEATR2   | 0.328639963 | mirna_pc |
| 26661 | hsa-mir-92a-1 | PRAME    | 0.322077091 | mirna_pc |
| 26662 | hsa-mir-92a-1 | CMTM1    | 0.316083121 | mirna_pc |
| 26663 | hsa-mir-92a-1 | CSRP2BP  | 0.31084869  | mirna_pc |
| 26664 | hsa-mir-92a-1 | CEP152   | 0.323991443 | mirna_pc |
| 26665 | hsa-mir-92a-1 | RNF219   | 0.567646589 | mirna_pc |
| 26666 | hsa-mir-92a-1 | SLC25A32 | 0.350503962 | mirna_pc |
| 26667 | hsa-mir-92a-1 | ENOPH1   | 0.30725816  | mirna_pc |
| 26668 | hsa-mir-92a-1 | PABPC1L  | 0.333381064 | mirna_pc |
| 26669 | hsa-mir-92a-1 | C17orf42 | 0.34918958  | mirna_pc |
| 26670 | hsa-mir-92a-1 | DDX55    | 0.327983621 | mirna_pc |
| 26671 | hsa-mir-92a-1 | CEP78    | 0.372406551 | mirna_pc |
| 26672 | hsa-mir-92a-1 | POLA1    | 0.338785616 | mirna_pc |
| 26673 | hsa-mir-92a-1 | HDAC2    | 0.322634673 | mirna_pc |
| 26674 | hsa-mir-92a-1 | POLG2    | 0.338245086 | mirna_pc |
| 26675 | hsa-mir-92a-1 | C10orf2  | 0.420198062 | mirna_pc |

|                     |          |                      |
|---------------------|----------|----------------------|
| 26676 hsa-mir-92a-1 | XRN2     | 0.378688092 mirna_pc |
| 26677 hsa-mir-92a-1 | KPNB1    | 0.399514509 mirna_pc |
| 26678 hsa-mir-92a-1 | SMC3     | 0.379015988 mirna_pc |
| 26679 hsa-mir-92a-1 | FLVCR1   | 0.329835731 mirna_pc |
| 26680 hsa-mir-92a-1 | ZBED4    | 0.317309285 mirna_pc |
| 26681 hsa-mir-92a-1 | AGMAT    | 0.343089586 mirna_pc |
| 26682 hsa-mir-92a-1 | MEX3A    | 0.392944408 mirna_pc |
| 26683 hsa-mir-92a-1 | BAT1     | 0.338816494 mirna_pc |
| 26684 hsa-mir-92a-1 | COIL     | 0.347053853 mirna_pc |
| 26685 hsa-mir-92a-1 | MSH5     | 0.34202461 mirna_pc  |
| 26686 hsa-mir-92a-1 | MRM1     | 0.314368027 mirna_pc |
| 26687 hsa-mir-92a-1 | TMC7     | 0.311549497 mirna_pc |
| 26688 hsa-mir-92a-1 | NANP     | 0.309300783 mirna_pc |
| 26689 hsa-mir-92a-1 | SUZ12    | 0.383871893 mirna_pc |
| 26690 hsa-mir-92a-1 | HMGB1    | 0.412854285 mirna_pc |
| 26691 hsa-mir-92a-1 | ZBTB12   | 0.432586082 mirna_pc |
| 26692 hsa-mir-92a-1 | TMEM68   | 0.318282997 mirna_pc |
| 26693 hsa-mir-92a-1 | TGIF2    | 0.372918253 mirna_pc |
| 26694 hsa-mir-92a-1 | FARSB    | 0.340267665 mirna_pc |
| 26695 hsa-mir-92a-1 | PIK3AP1  | 0.377742276 mirna_pc |
| 26696 hsa-mir-92a-1 | CIB2     | 0.302422309 mirna_pc |
| 26697 hsa-mir-92a-1 | FAM96A   | 0.300235691 mirna_pc |
| 26698 hsa-mir-92a-1 | SC65     | 0.304393668 mirna_pc |
| 26699 hsa-mir-92a-1 | POLE     | 0.351673429 mirna_pc |
| 26700 hsa-mir-92a-1 | SOX9     | 0.458031108 mirna_pc |
| 26701 hsa-mir-92a-1 | NSUN7    | 0.301176824 mirna_pc |
| 26702 hsa-mir-92a-1 | C13orf27 | 0.351479427 mirna_pc |
| 26703 hsa-mir-92a-1 | RBMX     | 0.374519839 mirna_pc |
| 26704 hsa-mir-92a-1 | GPR180   | 0.358318017 mirna_pc |
| 26705 hsa-mir-92a-1 | XRCC5    | 0.399955749 mirna_pc |
| 26706 hsa-mir-92a-1 | EXOSC8   | 0.330432723 mirna_pc |
| 26707 hsa-mir-92a-1 | LBR      | 0.307680034 mirna_pc |
| 26708 hsa-mir-92a-1 | DNAJC14  | 0.332918526 mirna_pc |
| 26709 hsa-mir-92a-1 | ZNF519   | 0.351093825 mirna_pc |
| 26710 hsa-mir-92a-1 | ORC2L    | 0.305168811 mirna_pc |
| 26711 hsa-mir-92a-1 | EFCAB4B  | 0.30908208 mirna_pc  |
| 26712 hsa-mir-92a-1 | FAM136A  | 0.366665855 mirna_pc |
| 26713 hsa-mir-92a-1 | NRAS     | 0.436599765 mirna_pc |
| 26714 hsa-mir-92a-1 | C12orf49 | 0.310693189 mirna_pc |
| 26715 hsa-mir-92a-1 | COG3     | 0.31965195 mirna_pc  |
| 26716 hsa-mir-92a-1 | EIF1AX   | 0.301308906 mirna_pc |
| 26717 hsa-mir-92a-1 | FBX041   | 0.357188828 mirna_pc |
| 26718 hsa-mir-92a-1 | BIVM     | 0.378706827 mirna_pc |
| 26719 hsa-mir-92a-1 | RBCK1    | 0.329189003 mirna_pc |
| 26720 hsa-mir-92a-1 | EML4     | 0.38390274 mirna_pc  |
| 26721 hsa-mir-92a-1 | LRPPRC   | 0.30220877 mirna_pc  |
| 26722 hsa-mir-92a-1 | CSNK2A1  | 0.35359933 mirna_pc  |
| 26723 hsa-mir-92a-1 | RPIA     | 0.39942769 mirna_pc  |
| 26724 hsa-mir-92a-1 | CXorf38  | 0.300276809 mirna_pc |
| 26725 hsa-mir-92a-1 | C7orf44  | 0.34609095 mirna_pc  |
| 26726 hsa-mir-92a-1 | URB2     | 0.343443808 mirna_pc |
| 26727 hsa-mir-92a-1 | ZNF286A  | 0.316948277 mirna_pc |
| 26728 hsa-mir-92a-1 | NAA16    | 0.329495465 mirna_pc |
| 26729 hsa-mir-92a-1 | SLC27A2  | 0.322325991 mirna_pc |

|                     |          |                      |
|---------------------|----------|----------------------|
| 26730 hsa-mir-92a-1 | SFXN4    | 0.337591752 mirna_pc |
| 26731 hsa-mir-92a-1 | SURF6    | 0.325809229 mirna_pc |
| 26732 hsa-mir-92a-1 | RBM28    | 0.320414015 mirna_pc |
| 26733 hsa-mir-92a-1 | RANBP17  | 0.301346338 mirna_pc |
| 26734 hsa-mir-92a-1 | MRE11A   | 0.330438376 mirna_pc |
| 26735 hsa-mir-92a-1 | ANKRD46  | 0.302814752 mirna_pc |
| 26736 hsa-mir-92a-1 | LTK      | 0.308007792 mirna_pc |
| 26737 hsa-mir-92a-1 | UTP14C   | 0.322717893 mirna_pc |
| 26738 hsa-mir-92a-1 | GOSR1    | 0.30873343 mirna_pc  |
| 26739 hsa-mir-92a-1 | USP37    | 0.306573761 mirna_pc |
| 26740 hsa-mir-92a-1 | PLB1     | 0.317282983 mirna_pc |
| 26741 hsa-mir-92a-1 | ZNF84    | 0.301540662 mirna_pc |
| 26742 hsa-mir-92a-1 | C13orf23 | 0.426466263 mirna_pc |
| 26743 hsa-mir-92a-1 | RBM12    | 0.319879168 mirna_pc |
| 26744 hsa-mir-92a-1 | TCERG1   | 0.31843825 mirna_pc  |
| 26745 hsa-mir-92a-1 | PSPC1    | 0.367256752 mirna_pc |
| 26746 hsa-mir-92a-1 | GMCL1    | 0.37603279 mirna_pc  |
| 26747 hsa-mir-92a-1 | E2F6     | 0.387143517 mirna_pc |
| 26748 hsa-mir-92a-1 | ZNF833   | 0.324109129 mirna_pc |
| 26749 hsa-mir-92a-1 | SLC25A15 | 0.398031412 mirna_pc |
| 26750 hsa-mir-92a-1 | SFRS13A  | 0.365649466 mirna_pc |
| 26751 hsa-mir-92a-1 | SCLY     | 0.332261087 mirna_pc |
| 26752 hsa-mir-92a-1 | TGDS     | 0.399742432 mirna_pc |
| 26753 hsa-mir-92a-1 | TFAM     | 0.347264036 mirna_pc |
| 26754 hsa-mir-92a-1 | ORC4L    | 0.347315508 mirna_pc |
| 26755 hsa-mir-92a-1 | KIAA1704 | 0.414901207 mirna_pc |
| 26756 hsa-mir-92a-1 | MTIF2    | 0.383956025 mirna_pc |
| 26757 hsa-mir-92a-1 | MSL1     | 0.413339403 mirna_pc |
| 26758 hsa-mir-92a-1 | ZNF828   | 0.390369019 mirna_pc |
| 26759 hsa-mir-92a-1 | SMC1A    | 0.39641898 mirna_pc  |
| 26760 hsa-mir-92a-1 | NUPL1    | 0.48319038 mirna_pc  |
| 26761 hsa-mir-92a-1 | CCDC45   | 0.368186573 mirna_pc |
| 26762 hsa-mir-92a-1 | WBP4     | 0.328415111 mirna_pc |
| 26763 hsa-mir-92a-1 | ANKRD5   | 0.37543006 mirna_pc  |
| 26764 hsa-mir-92a-1 | ZNF514   | 0.319020306 mirna_pc |
| 26765 hsa-mir-92a-1 | PHKA2    | 0.330685955 mirna_pc |
| 26766 hsa-mir-92a-1 | UPF3A    | 0.376760801 mirna_pc |
| 26767 hsa-mir-92a-1 | SFRS7    | 0.320987219 mirna_pc |
| 26768 hsa-mir-92a-1 | MRPL42   | 0.30369838 mirna_pc  |
| 26769 hsa-mir-92a-1 | CA5BP    | 0.321445234 mirna_pc |
| 26770 hsa-mir-92a-1 | SPRY2    | 0.332422305 mirna_pc |
| 26771 hsa-mir-92a-1 | RBM10    | 0.302343529 mirna_pc |
| 26772 hsa-mir-92a-1 | UFM1     | 0.311953097 mirna_pc |
| 26773 hsa-mir-92a-1 | KBTBD7   | 0.342771725 mirna_pc |
| 26774 hsa-mir-92a-1 | ANKS6    | 0.312523215 mirna_pc |
| 26775 hsa-mir-92a-1 | ATP7B    | 0.364136687 mirna_pc |
| 26776 hsa-mir-92a-1 | ZNF214   | 0.307601576 mirna_pc |
| 26777 hsa-mir-92a-1 | C11orf57 | 0.317438532 mirna_pc |
| 26778 hsa-mir-92a-1 | SYAP1    | 0.318602112 mirna_pc |
| 26779 hsa-mir-92a-1 | RCBTB1   | 0.331809556 mirna_pc |
| 26780 hsa-mir-92a-1 | CDC16    | 0.35729097 mirna_pc  |
| 26781 hsa-mir-92a-1 | PTCD3    | 0.336034711 mirna_pc |
| 26782 hsa-mir-92a-1 | SPRY4    | 0.322581334 mirna_pc |
| 26783 hsa-mir-92a-1 | RNF6     | 0.343556482 mirna_pc |

|                     |           |                      |
|---------------------|-----------|----------------------|
| 26784 hsa-mir-92a-1 | BCAN      | 0.309199418 mirna_pc |
| 26785 hsa-mir-92a-1 | ALG5      | 0.34519964 mirna_pc  |
| 26786 hsa-mir-92a-1 | MAP2K6    | 0.425191406 mirna_pc |
| 26787 hsa-mir-92a-1 | CASP6     | 0.316617779 mirna_pc |
| 26788 hsa-mir-92a-1 | RBM26     | 0.362526587 mirna_pc |
| 26789 hsa-mir-92a-1 | ZNF92     | 0.359789076 mirna_pc |
| 26790 hsa-mir-92a-1 | TMTC4     | 0.39209201 mirna_pc  |
| 26791 hsa-mir-92a-1 | LOC151162 | 0.338513364 mirna_pc |
| 26792 hsa-mir-92a-1 | RMND1     | 0.321950439 mirna_pc |
| 26793 hsa-mir-92a-1 | AZIN1     | 0.34953705 mirna_pc  |
| 26794 hsa-mir-92a-1 | GLYCTK    | 0.314557273 mirna_pc |
| 26795 hsa-mir-92a-1 | CEBPZ     | 0.347296459 mirna_pc |
| 26796 hsa-mir-92a-1 | FASTKD5   | 0.300764356 mirna_pc |
| 26797 hsa-mir-92a-1 | SMARCE1   | 0.406528804 mirna_pc |
| 26798 hsa-mir-92a-1 | C8orf33   | 0.30490789 mirna_pc  |
| 26799 hsa-mir-92a-1 | TASP1     | 0.343763528 mirna_pc |
| 26800 hsa-mir-92a-1 | IPO5      | 0.468456499 mirna_pc |
| 26801 hsa-mir-92a-1 | ALG11     | 0.421005665 mirna_pc |
| 26802 hsa-mir-92a-1 | MLXIPL    | 0.301090555 mirna_pc |
| 26803 hsa-mir-92a-1 | NUP43     | 0.316764162 mirna_pc |
| 26804 hsa-mir-92a-1 | MTRF1     | 0.346932241 mirna_pc |
| 26805 hsa-mir-92a-1 | ZNF124    | 0.483806559 mirna_pc |
| 26806 hsa-mir-92a-1 | RNASEH2B  | 0.406178026 mirna_pc |
| 26807 hsa-mir-92a-1 | CHD1L     | 0.329268024 mirna_pc |
| 26808 hsa-mir-92a-1 | ZNF473    | 0.438305213 mirna_pc |
| 26809 hsa-mir-92a-1 | RFXAP     | 0.381109554 mirna_pc |
| 26810 hsa-mir-92a-1 | DCLRE1A   | 0.418827967 mirna_pc |
| 26811 hsa-mir-92a-1 | ANP32A    | 0.403630791 mirna_pc |
| 26812 hsa-mir-92a-1 | E2F5      | 0.363204601 mirna_pc |
| 26813 hsa-mir-92a-1 | NUFIP1    | 0.481229412 mirna_pc |
| 26814 hsa-mir-92a-1 | ZNF195    | 0.466262237 mirna_pc |
| 26815 hsa-mir-92a-1 | BCAS2     | 0.402273638 mirna_pc |
| 26816 hsa-mir-92a-1 | USP45     | 0.34600684 mirna_pc  |
| 26817 hsa-mir-92a-1 | LRRCC1    | 0.360150375 mirna_pc |
| 26818 hsa-mir-92a-1 | NEK3      | 0.392868335 mirna_pc |
| 26819 hsa-mir-92a-1 | THSD1P1   | 0.337668029 mirna_pc |
| 26820 hsa-mir-92a-1 | TMEM170A  | 0.373782147 mirna_pc |
| 26821 hsa-mir-92a-1 | PHF16     | 0.333954191 mirna_pc |
| 26822 hsa-mir-92a-1 | FAM48A    | 0.48624691 mirna_pc  |
| 26823 hsa-mir-92a-1 | PMS1      | 0.346200529 mirna_pc |
| 26824 hsa-mir-92a-1 | PNN       | 0.309817701 mirna_pc |
| 26825 hsa-mir-92a-1 | MNS1      | 0.328451959 mirna_pc |
| 26826 hsa-mir-92a-1 | ZNF485    | 0.339142034 mirna_pc |
| 26827 hsa-mir-92a-1 | PAN3      | 0.334989072 mirna_pc |
| 26828 hsa-mir-92a-1 | CCDC122   | 0.41424479 mirna_pc  |
| 26829 hsa-mir-92a-1 | OFD1      | 0.31262892 mirna_pc  |
| 26830 hsa-mir-92a-1 | TRUB1     | 0.345359325 mirna_pc |
| 26831 hsa-mir-92a-1 | ZMYM2     | 0.377273927 mirna_pc |
| 26832 hsa-mir-92a-1 | C2orf15   | 0.311117194 mirna_pc |
| 26833 hsa-mir-92a-1 | CCNJ      | 0.482044277 mirna_pc |
| 26834 hsa-mir-92a-1 | PM20D2    | 0.321300146 mirna_pc |
| 26835 hsa-mir-92a-1 | DCAF16    | 0.348220563 mirna_pc |
| 26836 hsa-mir-92a-1 | SBK1      | 0.329403513 mirna_pc |
| 26837 hsa-mir-92a-1 | ABCC4     | 0.383159177 mirna_pc |

|       |               |              |             |          |
|-------|---------------|--------------|-------------|----------|
| 26838 | hsa-mir-92a-1 | KBTBD6       | 0.333494739 | mirna_pc |
| 26839 | hsa-mir-92a-1 | ESF1         | 0.353815678 | mirna_pc |
| 26840 | hsa-mir-92a-1 | MLEC         | 0.302336493 | mirna_pc |
| 26841 | hsa-mir-92a-1 | RNF157       | 0.300217604 | mirna_pc |
| 26842 | hsa-mir-92a-1 | GTF2H2C      | 0.326827538 | mirna_pc |
| 26843 | hsa-mir-92a-1 | SMARCC1      | 0.332982419 | mirna_pc |
| 26844 | hsa-mir-92a-1 | SUGT1L1      | 0.305663244 | mirna_pc |
| 26845 | hsa-mir-92a-1 | CTPS2        | 0.440969097 | mirna_pc |
| 26846 | hsa-mir-92a-1 | GXYLT1       | 0.320413684 | mirna_pc |
| 26847 | hsa-mir-92a-1 | XPO4         | 0.482783159 | mirna_pc |
| 26848 | hsa-mir-92a-1 | MDN1         | 0.300439733 | mirna_pc |
| 26849 | hsa-mir-92a-1 | KIF12        | 0.313717279 | mirna_pc |
| 26850 | hsa-mir-92a-1 | ZBTB39       | 0.352055884 | mirna_pc |
| 26851 | hsa-mir-92a-1 | IFT88        | 0.440969325 | mirna_pc |
| 26852 | hsa-mir-92a-1 | QRSL1        | 0.376417958 | mirna_pc |
| 26853 | hsa-mir-92a-1 | FANCF        | 0.451312785 | mirna_pc |
| 26854 | hsa-mir-92a-1 | MARS2        | 0.334898772 | mirna_pc |
| 26855 | hsa-mir-92a-1 | VPS54        | 0.329486157 | mirna_pc |
| 26856 | hsa-mir-92a-1 | ZBTB24       | 0.352370762 | mirna_pc |
| 26857 | hsa-mir-92a-1 | ZNF138       | 0.341016343 | mirna_pc |
| 26858 | hsa-mir-92a-1 | ZNF551       | 0.31553289  | mirna_pc |
| 26859 | hsa-mir-92a-1 | CIAO1        | 0.361689581 | mirna_pc |
| 26860 | hsa-mir-92a-1 | C2orf3       | 0.371792262 | mirna_pc |
| 26861 | hsa-mir-92a-1 | ZSCAN29      | 0.3337651   | mirna_pc |
| 26862 | hsa-mir-92a-1 | ZNF664       | 0.390743167 | mirna_pc |
| 26863 | hsa-mir-92a-1 | VPS36        | 0.358513258 | mirna_pc |
| 26864 | hsa-mir-92a-1 | GOLT1A       | 0.392381845 | mirna_pc |
| 26865 | hsa-mir-92a-1 | NCRNA00183   | 0.31913596  | mirna_pc |
| 26866 | hsa-mir-92a-1 | STK35        | 0.30081461  | mirna_pc |
| 26867 | hsa-mir-92a-1 | PPP4R2       | 0.30410883  | mirna_pc |
| 26868 | hsa-mir-92a-1 | MRPL19       | 0.375892872 | mirna_pc |
| 26869 | hsa-mir-92a-1 | ZCCHC3       | 0.47316127  | mirna_pc |
| 26870 | hsa-mir-92a-1 | RRP15        | 0.351256063 | mirna_pc |
| 26871 | hsa-mir-92a-1 | CASC3        | 0.373329652 | mirna_pc |
| 26872 | hsa-mir-92a-1 | IARS         | 0.304411202 | mirna_pc |
| 26873 | hsa-mir-92a-1 | AADAT        | 0.377512837 | mirna_pc |
| 26874 | hsa-mir-92a-1 | CBLL1        | 0.355776025 | mirna_pc |
| 26875 | hsa-mir-92a-1 | ACP1         | 0.31116609  | mirna_pc |
| 26876 | hsa-mir-92a-1 | C2orf43      | 0.373996788 | mirna_pc |
| 26877 | hsa-mir-92a-1 | DACH1        | 0.340898354 | mirna_pc |
| 26878 | hsa-mir-92a-1 | RARA         | 0.327618065 | mirna_pc |
| 26879 | hsa-mir-92a-1 | GTF3A        | 0.378408636 | mirna_pc |
| 26880 | hsa-mir-92a-1 | LOC100129637 | 0.308177831 | mirna_pc |
| 26881 | hsa-mir-92a-1 | TPP2         | 0.411592127 | mirna_pc |
| 26882 | hsa-mir-92a-1 | SPRED2       | 0.312116158 | mirna_pc |
| 26883 | hsa-mir-92a-1 | TXLNG        | 0.470641885 | mirna_pc |
| 26884 | hsa-mir-92a-1 | TRIM25       | 0.376056146 | mirna_pc |
| 26885 | hsa-mir-92a-1 | PRMT6        | 0.321110375 | mirna_pc |
| 26886 | hsa-mir-92a-1 | CEP57        | 0.304814325 | mirna_pc |
| 26887 | hsa-mir-92a-1 | NAA35        | 0.300131643 | mirna_pc |
| 26888 | hsa-mir-92a-1 | PPP1R1B      | 0.320389673 | mirna_pc |
| 26889 | hsa-mir-92a-1 | ZNF530       | 0.310531501 | mirna_pc |
| 26890 | hsa-mir-92a-1 | RAGE         | 0.305076934 | mirna_pc |
| 26891 | hsa-mir-92a-1 | MIR17HG      | 0.548467486 | mirna_pc |

|       |               |           |             |          |
|-------|---------------|-----------|-------------|----------|
| 26892 | hsa-mir-92a-1 | C20orf30  | 0.313452686 | mirna_pc |
| 26893 | hsa-mir-92a-1 | AARSD1    | 0.366954537 | mirna_pc |
| 26894 | hsa-mir-92a-1 | ZNF239    | 0.403972196 | mirna_pc |
| 26895 | hsa-mir-92a-1 | KLHL23    | 0.417975485 | mirna_pc |
| 26896 | hsa-mir-92a-1 | ZNF202    | 0.364983993 | mirna_pc |
| 26897 | hsa-mir-92a-1 | ZNF77     | 0.325785703 | mirna_pc |
| 26898 | hsa-mir-92a-1 | MRPS31    | 0.35882991  | mirna_pc |
| 26899 | hsa-mir-92a-1 | CENPV     | 0.319553477 | mirna_pc |
| 26900 | hsa-mir-92a-1 | SFRS6     | 0.324665723 | mirna_pc |
| 26901 | hsa-mir-92a-1 | SLC4A5    | 0.331971492 | mirna_pc |
| 26902 | hsa-mir-92a-1 | DNMT3A    | 0.418887045 | mirna_pc |
| 26903 | hsa-mir-92a-1 | MIPEP     | 0.329999937 | mirna_pc |
| 26904 | hsa-mir-92a-1 | PRTFDC1   | 0.356029013 | mirna_pc |
| 26905 | hsa-mir-92a-1 | PATZ1     | 0.385195237 | mirna_pc |
| 26906 | hsa-mir-92a-1 | ZNF670    | 0.39126945  | mirna_pc |
| 26907 | hsa-mir-92a-1 | ZNF343    | 0.357897649 | mirna_pc |
| 26908 | hsa-mir-92a-1 | WIPF2     | 0.370296036 | mirna_pc |
| 26909 | hsa-mir-92a-1 | ZNF711    | 0.405912038 | mirna_pc |
| 26910 | hsa-mir-92a-1 | ARSE      | 0.315599999 | mirna_pc |
| 26911 | hsa-mir-92a-1 | POM121    | 0.327277287 | mirna_pc |
| 26912 | hsa-mir-191   | MKI67     | 0.312623036 | mirna_pc |
| 26913 | hsa-mir-191   | TPX2      | 0.329048952 | mirna_pc |
| 26914 | hsa-mir-191   | KIF4B     | 0.345375902 | mirna_pc |
| 26915 | hsa-mir-191   | HOXC9     | 0.430451683 | mirna_pc |
| 26916 | hsa-mir-191   | CDC25C    | 0.400285646 | mirna_pc |
| 26917 | hsa-mir-191   | UBE2C     | 0.319307761 | mirna_pc |
| 26918 | hsa-mir-191   | KIFC1     | 0.379199915 | mirna_pc |
| 26919 | hsa-mir-191   | BUB1B     | 0.332575386 | mirna_pc |
| 26920 | hsa-mir-191   | FAM72A    | 0.381863205 | mirna_pc |
| 26921 | hsa-mir-191   | SGOL1     | 0.542424885 | mirna_pc |
| 26922 | hsa-mir-191   | ARHGAP11A | 0.373051588 | mirna_pc |
| 26923 | hsa-mir-191   | IQGAP3    | 0.361821553 | mirna_pc |
| 26924 | hsa-mir-191   | NEK2      | 0.382908192 | mirna_pc |
| 26925 | hsa-mir-191   | HOXC11    | 0.384538194 | mirna_pc |
| 26926 | hsa-mir-191   | LMNB1     | 0.30577566  | mirna_pc |
| 26927 | hsa-mir-191   | CDCA8     | 0.437498718 | mirna_pc |
| 26928 | hsa-mir-191   | STIL      | 0.403074636 | mirna_pc |
| 26929 | hsa-mir-191   | KIF4A     | 0.352051625 | mirna_pc |
| 26930 | hsa-mir-191   | HJURP     | 0.322754695 | mirna_pc |
| 26931 | hsa-mir-191   | BLM       | 0.314052438 | mirna_pc |
| 26932 | hsa-mir-191   | CCDC150   | 0.313148104 | mirna_pc |
| 26933 | hsa-mir-191   | RCC1      | 0.32271287  | mirna_pc |
| 26934 | hsa-mir-191   | OIP5      | 0.466366724 | mirna_pc |
| 26935 | hsa-mir-191   | RECQL4    | 0.310450166 | mirna_pc |
| 26936 | hsa-mir-191   | AURKA     | 0.46441225  | mirna_pc |
| 26937 | hsa-mir-191   | CHEK2     | 0.319172775 | mirna_pc |
| 26938 | hsa-mir-191   | KIF15     | 0.486002053 | mirna_pc |
| 26939 | hsa-mir-191   | FEN1      | 0.352045532 | mirna_pc |
| 26940 | hsa-mir-191   | TRAIP     | 0.512865994 | mirna_pc |
| 26941 | hsa-mir-191   | ARHGAP11B | 0.314922224 | mirna_pc |
| 26942 | hsa-mir-191   | CASC5     | 0.315944589 | mirna_pc |
| 26943 | hsa-mir-191   | RAE1      | 0.353406144 | mirna_pc |
| 26944 | hsa-mir-191   | FAM72D    | 0.43505107  | mirna_pc |
| 26945 | hsa-mir-191   | FAM72B    | 0.350858268 | mirna_pc |

|                   |          |                      |
|-------------------|----------|----------------------|
| 26946 hsa-mir-191 | C12orf48 | 0.351556436 mirna_pc |
| 26947 hsa-mir-191 | TTK      | 0.304547443 mirna_pc |
| 26948 hsa-mir-191 | ZWINT    | 0.50358736 mirna_pc  |
| 26949 hsa-mir-191 | BUB3     | 0.378132973 mirna_pc |
| 26950 hsa-mir-191 | PDHB     | 0.356675627 mirna_pc |
| 26951 hsa-mir-191 | PIF1     | 0.349778942 mirna_pc |
| 26952 hsa-mir-191 | DNAH3    | 0.327933083 mirna_pc |
| 26953 hsa-mir-191 | E2F1     | 0.349721765 mirna_pc |
| 26954 hsa-mir-191 | C1orf135 | 0.360664555 mirna_pc |
| 26955 hsa-mir-191 | HOXA11   | 0.364358151 mirna_pc |
| 26956 hsa-mir-191 | POC1A    | 0.515675659 mirna_pc |
| 26957 hsa-mir-191 | ARL6IP1  | 0.314613612 mirna_pc |
| 26958 hsa-mir-191 | DNA2     | 0.387253481 mirna_pc |
| 26959 hsa-mir-191 | NEURL3   | 0.302362856 mirna_pc |
| 26960 hsa-mir-191 | DNAJC6   | 0.303403988 mirna_pc |
| 26961 hsa-mir-191 | DSN1     | 0.311581111 mirna_pc |
| 26962 hsa-mir-191 | DTYMK    | 0.317690082 mirna_pc |
| 26963 hsa-mir-191 | PIGU     | 0.300659004 mirna_pc |
| 26964 hsa-mir-191 | C5       | 0.328431511 mirna_pc |
| 26965 hsa-mir-191 | CLDN7    | 0.328415658 mirna_pc |
| 26966 hsa-mir-191 | ZBED3    | 0.305377949 mirna_pc |
| 26967 hsa-mir-191 | HOXA10   | 0.439314035 mirna_pc |
| 26968 hsa-mir-191 | PRIM1    | 0.385030182 mirna_pc |
| 26969 hsa-mir-191 | PSMC4    | 0.312463494 mirna_pc |
| 26970 hsa-mir-191 | DDX27    | 0.403802931 mirna_pc |
| 26971 hsa-mir-191 | RHOU     | 0.316169488 mirna_pc |
| 26972 hsa-mir-191 | HOXC10   | 0.403716053 mirna_pc |
| 26973 hsa-mir-191 | MSH2     | 0.36328565 mirna_pc  |
| 26974 hsa-mir-191 | SALL4    | 0.416296402 mirna_pc |
| 26975 hsa-mir-191 | EIF2AK1  | 0.308228846 mirna_pc |
| 26976 hsa-mir-191 | SSB      | 0.336984244 mirna_pc |
| 26977 hsa-mir-191 | SNRPC    | 0.361493512 mirna_pc |
| 26978 hsa-mir-191 | SUOX     | 0.341489895 mirna_pc |
| 26979 hsa-mir-191 | MDK      | 0.347755241 mirna_pc |
| 26980 hsa-mir-191 | E2F3     | 0.393974143 mirna_pc |
| 26981 hsa-mir-191 | CDC25A   | 0.510086437 mirna_pc |
| 26982 hsa-mir-191 | TMEM48   | 0.425518718 mirna_pc |
| 26983 hsa-mir-191 | MGC12982 | 0.303665662 mirna_pc |
| 26984 hsa-mir-191 | FXC1     | 0.357519155 mirna_pc |
| 26985 hsa-mir-191 | SRPK1    | 0.41193511 mirna_pc  |
| 26986 hsa-mir-191 | CLN6     | 0.31980894 mirna_pc  |
| 26987 hsa-mir-191 | C21orf45 | 0.343312615 mirna_pc |
| 26988 hsa-mir-191 | ATIC     | 0.458527935 mirna_pc |
| 26989 hsa-mir-191 | ISOC1    | 0.343390422 mirna_pc |
| 26990 hsa-mir-191 | XK       | 0.321983653 mirna_pc |
| 26991 hsa-mir-191 | UTP6     | 0.306703054 mirna_pc |
| 26992 hsa-mir-191 | MARCKSL1 | 0.425717487 mirna_pc |
| 26993 hsa-mir-191 | HOXA13   | 0.355875257 mirna_pc |
| 26994 hsa-mir-191 | CBX8     | 0.383908404 mirna_pc |
| 26995 hsa-mir-191 | GNPDA1   | 0.341421756 mirna_pc |
| 26996 hsa-mir-191 | ARIH2    | 0.452958259 mirna_pc |
| 26997 hsa-mir-191 | PAFAH1B3 | 0.329988449 mirna_pc |
| 26998 hsa-mir-191 | SASS6    | 0.312900056 mirna_pc |
| 26999 hsa-mir-191 | PSRC1    | 0.302774973 mirna_pc |



|                   |              |                      |
|-------------------|--------------|----------------------|
| 27000 hsa-mir-191 | POU2F1       | 0.358912376 mirna_pc |
| 27001 hsa-mir-191 | MARVELD3     | 0.381854923 mirna_pc |
| 27002 hsa-mir-191 | TMPO         | 0.406685004 mirna_pc |
| 27003 hsa-mir-191 | RPP14        | 0.425145248 mirna_pc |
| 27004 hsa-mir-191 | LOC100128191 | 0.344673076 mirna_pc |
| 27005 hsa-mir-191 | CHRNA5       | 0.425572203 mirna_pc |
| 27006 hsa-mir-191 | TMEM56       | 0.31143315 mirna_pc  |
| 27007 hsa-mir-191 | SLC25A20     | 0.40970504 mirna_pc  |
| 27008 hsa-mir-191 | PHF6         | 0.330023793 mirna_pc |
| 27009 hsa-mir-191 | ZNF717       | 0.32160959 mirna_pc  |
| 27010 hsa-mir-191 | TRPM2        | 0.393680761 mirna_pc |
| 27011 hsa-mir-191 | SFRS1        | 0.303649539 mirna_pc |
| 27012 hsa-mir-191 | CASP8        | 0.415714809 mirna_pc |
| 27013 hsa-mir-191 | WDR48        | 0.322835388 mirna_pc |
| 27014 hsa-mir-191 | GAD1         | 0.307971222 mirna_pc |
| 27015 hsa-mir-191 | DARS2        | 0.41559049 mirna_pc  |
| 27016 hsa-mir-191 | UTP14A       | 0.32695642 mirna_pc  |
| 27017 hsa-mir-191 | SNX8         | 0.333585051 mirna_pc |
| 27018 hsa-mir-191 | ZNF33A       | 0.32411542 mirna_pc  |
| 27019 hsa-mir-191 | IP6K1        | 0.330269075 mirna_pc |
| 27020 hsa-mir-191 | ANKRD43      | 0.345259584 mirna_pc |
| 27021 hsa-mir-191 | CHPT1        | 0.314502389 mirna_pc |
| 27022 hsa-mir-191 | SLC5A6       | 0.447478203 mirna_pc |
| 27023 hsa-mir-191 | TOMM34       | 0.48978923 mirna_pc  |
| 27024 hsa-mir-191 | KIAA1143     | 0.397267261 mirna_pc |
| 27025 hsa-mir-191 | TUSC2        | 0.466028427 mirna_pc |
| 27026 hsa-mir-191 | AHCY         | 0.392627477 mirna_pc |
| 27027 hsa-mir-191 | EIF4EBP2     | 0.368663617 mirna_pc |
| 27028 hsa-mir-191 | HNRNPF       | 0.369360958 mirna_pc |
| 27029 hsa-mir-191 | PHYH         | 0.338140432 mirna_pc |
| 27030 hsa-mir-191 | INTS8        | 0.300333684 mirna_pc |
| 27031 hsa-mir-191 | RAD18        | 0.400600146 mirna_pc |
| 27032 hsa-mir-191 | CCNE1        | 0.306043412 mirna_pc |
| 27033 hsa-mir-191 | NR6A1        | 0.322786874 mirna_pc |
| 27034 hsa-mir-191 | SUV420H2     | 0.303617294 mirna_pc |
| 27035 hsa-mir-191 | ZNF695       | 0.46360912 mirna_pc  |
| 27036 hsa-mir-191 | ADCY6        | 0.436617431 mirna_pc |
| 27037 hsa-mir-191 | PDSS1        | 0.452289414 mirna_pc |
| 27038 hsa-mir-191 | PDHA1        | 0.301352598 mirna_pc |
| 27039 hsa-mir-191 | C3orf23      | 0.351074134 mirna_pc |
| 27040 hsa-mir-191 | NOC2L        | 0.319833235 mirna_pc |
| 27041 hsa-mir-191 | NONO         | 0.313965974 mirna_pc |
| 27042 hsa-mir-191 | RNF123       | 0.408065339 mirna_pc |
| 27043 hsa-mir-191 | POLR1B       | 0.313086799 mirna_pc |
| 27044 hsa-mir-191 | OBFC2B       | 0.434377235 mirna_pc |
| 27045 hsa-mir-191 | APPL1        | 0.421691142 mirna_pc |
| 27046 hsa-mir-191 | SCARB1       | 0.611291247 mirna_pc |
| 27047 hsa-mir-191 | ELK1         | 0.420789993 mirna_pc |
| 27048 hsa-mir-191 | ARHGAP39     | 0.359910518 mirna_pc |
| 27049 hsa-mir-191 | USP19        | 0.43753623 mirna_pc  |
| 27050 hsa-mir-191 | ACTR8        | 0.344197938 mirna_pc |
| 27051 hsa-mir-191 | CLCN2        | 0.501299563 mirna_pc |
| 27052 hsa-mir-191 | GORASP1      | 0.35587558 mirna_pc  |
| 27053 hsa-mir-191 | SUV39H2      | 0.342364084 mirna_pc |

|                   |           |                      |
|-------------------|-----------|----------------------|
| 27054 hsa-mir-191 | C9orf152  | 0.361067249 mirna_pc |
| 27055 hsa-mir-191 | LSM 2.00  | 0.332287188 mirna_pc |
| 27056 hsa-mir-191 | FBXL6     | 0.31563952 mirna_pc  |
| 27057 hsa-mir-191 | FOXD2     | 0.307880849 mirna_pc |
| 27058 hsa-mir-191 | SH3BGRL2  | 0.301756833 mirna_pc |
| 27059 hsa-mir-191 | TMEM86B   | 0.371382626 mirna_pc |
| 27060 hsa-mir-191 | RRP9      | 0.393839322 mirna_pc |
| 27061 hsa-mir-191 | AATK      | 0.308676524 mirna_pc |
| 27062 hsa-mir-191 | GTPBP4    | 0.329777795 mirna_pc |
| 27063 hsa-mir-191 | NFE2L3    | 0.338675711 mirna_pc |
| 27064 hsa-mir-191 | TFR2      | 0.340429908 mirna_pc |
| 27065 hsa-mir-191 | RDH5      | 0.321285534 mirna_pc |
| 27066 hsa-mir-191 | CCDC121   | 0.307005133 mirna_pc |
| 27067 hsa-mir-191 | HABP4     | 0.320751973 mirna_pc |
| 27068 hsa-mir-191 | C6orf223  | 0.358805523 mirna_pc |
| 27069 hsa-mir-191 | HSP90B1   | 0.394606967 mirna_pc |
| 27070 hsa-mir-191 | ZNF445    | 0.300569926 mirna_pc |
| 27071 hsa-mir-191 | RBM6      | 0.398905589 mirna_pc |
| 27072 hsa-mir-191 | PAK1IP1   | 0.337607972 mirna_pc |
| 27073 hsa-mir-191 | PGPEP1    | 0.372846048 mirna_pc |
| 27074 hsa-mir-191 | BRPF3     | 0.393942024 mirna_pc |
| 27075 hsa-mir-191 | EDEM2     | 0.402754779 mirna_pc |
| 27076 hsa-mir-191 | SLMO2     | 0.320175482 mirna_pc |
| 27077 hsa-mir-191 | C1orf59   | 0.462238466 mirna_pc |
| 27078 hsa-mir-191 | C3orf39   | 0.373636047 mirna_pc |
| 27079 hsa-mir-191 | SVIP      | 0.326676201 mirna_pc |
| 27080 hsa-mir-191 | EPCAM     | 0.497484008 mirna_pc |
| 27081 hsa-mir-191 | ARHGAP8   | 0.307970053 mirna_pc |
| 27082 hsa-mir-191 | CTSA      | 0.35124292 mirna_pc  |
| 27083 hsa-mir-191 | IVD       | 0.392840301 mirna_pc |
| 27084 hsa-mir-191 | EHMT2     | 0.431211795 mirna_pc |
| 27085 hsa-mir-191 | GAS2L3    | 0.403960556 mirna_pc |
| 27086 hsa-mir-191 | BEND7     | 0.355792787 mirna_pc |
| 27087 hsa-mir-191 | TRIB3     | 0.300678547 mirna_pc |
| 27088 hsa-mir-191 | LOC113230 | 0.329960252 mirna_pc |
| 27089 hsa-mir-191 | PDRG1     | 0.504175214 mirna_pc |
| 27090 hsa-mir-191 | PASK      | 0.365269985 mirna_pc |
| 27091 hsa-mir-191 | ATP11A    | 0.354889824 mirna_pc |
| 27092 hsa-mir-191 | WDR46     | 0.334685141 mirna_pc |
| 27093 hsa-mir-191 | TAF4      | 0.446906944 mirna_pc |
| 27094 hsa-mir-191 | ZC3H12B   | 0.31986768 mirna_pc  |
| 27095 hsa-mir-191 | PPP2R1B   | 0.364559665 mirna_pc |
| 27096 hsa-mir-191 | MEIS2     | 0.315457288 mirna_pc |
| 27097 hsa-mir-191 | RNF114    | 0.39903878 mirna_pc  |
| 27098 hsa-mir-191 | ANG       | 0.362112013 mirna_pc |
| 27099 hsa-mir-191 | PRAME     | 0.324057459 mirna_pc |
| 27100 hsa-mir-191 | ZBTB9     | 0.394030911 mirna_pc |
| 27101 hsa-mir-191 | RPP25     | 0.317471051 mirna_pc |
| 27102 hsa-mir-191 | KIAA0776  | 0.306934703 mirna_pc |
| 27103 hsa-mir-191 | CSR2BP    | 0.441050269 mirna_pc |
| 27104 hsa-mir-191 | POFUT1    | 0.31911034 mirna_pc  |
| 27105 hsa-mir-191 | TRAF4     | 0.304948167 mirna_pc |
| 27106 hsa-mir-191 | NGLY1     | 0.340632133 mirna_pc |
| 27107 hsa-mir-191 | MRPS25    | 0.416185624 mirna_pc |

|                   |          |                      |
|-------------------|----------|----------------------|
| 27108 hsa-mir-191 | SLC35A2  | 0.485866736 mirna_pc |
| 27109 hsa-mir-191 | LSM14B   | 0.314854944 mirna_pc |
| 27110 hsa-mir-191 | P4HTM    | 0.38577811 mirna_pc  |
| 27111 hsa-mir-191 | C1orf174 | 0.386367135 mirna_pc |
| 27112 hsa-mir-191 | RPN2     | 0.421775342 mirna_pc |
| 27113 hsa-mir-191 | KCTD6    | 0.505845772 mirna_pc |
| 27114 hsa-mir-191 | SAE1     | 0.331644951 mirna_pc |
| 27115 hsa-mir-191 | ZNF621   | 0.307122465 mirna_pc |
| 27116 hsa-mir-191 | PABPC1L  | 0.424082214 mirna_pc |
| 27117 hsa-mir-191 | C17orf42 | 0.324164185 mirna_pc |
| 27118 hsa-mir-191 | TSEN54   | 0.384906826 mirna_pc |
| 27119 hsa-mir-191 | ACTR5    | 0.328269909 mirna_pc |
| 27120 hsa-mir-191 | SLC43A1  | 0.412228316 mirna_pc |
| 27121 hsa-mir-191 | HSPA14   | 0.346796273 mirna_pc |
| 27122 hsa-mir-191 | ZNF595   | 0.393973862 mirna_pc |
| 27123 hsa-mir-191 | AMIGO3   | 0.436040492 mirna_pc |
| 27124 hsa-mir-191 | DDX55    | 0.342942077 mirna_pc |
| 27125 hsa-mir-191 | HPDL     | 0.42955154 mirna_pc  |
| 27126 hsa-mir-191 | FCHO1    | 0.326269903 mirna_pc |
| 27127 hsa-mir-191 | CDK5RAP1 | 0.377644337 mirna_pc |
| 27128 hsa-mir-191 | CCDC103  | 0.308184426 mirna_pc |
| 27129 hsa-mir-191 | PDE12    | 0.417963553 mirna_pc |
| 27130 hsa-mir-191 | RCOR2    | 0.424104899 mirna_pc |
| 27131 hsa-mir-191 | ITIH4    | 0.352652297 mirna_pc |
| 27132 hsa-mir-191 | EPHB2    | 0.418824651 mirna_pc |
| 27133 hsa-mir-191 | ATAD3A   | 0.382549628 mirna_pc |
| 27134 hsa-mir-191 | TM9SF3   | 0.347019647 mirna_pc |
| 27135 hsa-mir-191 | POLA1    | 0.326541202 mirna_pc |
| 27136 hsa-mir-191 | HDAC2    | 0.362060728 mirna_pc |
| 27137 hsa-mir-191 | SLC25A38 | 0.38457389 mirna_pc  |
| 27138 hsa-mir-191 | PDCD2L   | 0.377992631 mirna_pc |
| 27139 hsa-mir-191 | C1orf115 | 0.407977653 mirna_pc |
| 27140 hsa-mir-191 | PA2G4P4  | 0.316900407 mirna_pc |
| 27141 hsa-mir-191 | CDX2     | 0.303662741 mirna_pc |
| 27142 hsa-mir-191 | ASCL2    | 0.412707584 mirna_pc |
| 27143 hsa-mir-191 | C10orf2  | 0.411450495 mirna_pc |
| 27144 hsa-mir-191 | RWDD2A   | 0.349524922 mirna_pc |
| 27145 hsa-mir-191 | ZBTB42   | 0.310985728 mirna_pc |
| 27146 hsa-mir-191 | SLC35E2  | 0.356410886 mirna_pc |
| 27147 hsa-mir-191 | SLC39A1  | 0.350806771 mirna_pc |
| 27148 hsa-mir-191 | BRI3BP   | 0.466684505 mirna_pc |
| 27149 hsa-mir-191 | CSTF1    | 0.38186936 mirna_pc  |
| 27150 hsa-mir-191 | UBE4A    | 0.368318514 mirna_pc |
| 27151 hsa-mir-191 | FLVCR1   | 0.379685902 mirna_pc |
| 27152 hsa-mir-191 | AGPAT1   | 0.320997486 mirna_pc |
| 27153 hsa-mir-191 | CAPS     | 0.338963674 mirna_pc |
| 27154 hsa-mir-191 | RAB17    | 0.339942475 mirna_pc |
| 27155 hsa-mir-191 | AP1M2    | 0.388043221 mirna_pc |
| 27156 hsa-mir-191 | GPAM     | 0.48092616 mirna_pc  |
| 27157 hsa-mir-191 | AGMAT    | 0.574326248 mirna_pc |
| 27158 hsa-mir-191 | TTC9C    | 0.378278639 mirna_pc |
| 27159 hsa-mir-191 | BAT1     | 0.434388396 mirna_pc |
| 27160 hsa-mir-191 | VARS     | 0.400332344 mirna_pc |
| 27161 hsa-mir-191 | MRPS12   | 0.312875618 mirna_pc |

|                   |          |                      |
|-------------------|----------|----------------------|
| 27162 hsa-mir-191 | ZSCAN2   | 0.361170947 mirna_pc |
| 27163 hsa-mir-191 | MSH5     | 0.424069494 mirna_pc |
| 27164 hsa-mir-191 | NOX01    | 0.369536236 mirna_pc |
| 27165 hsa-mir-191 | C12orf47 | 0.351321706 mirna_pc |
| 27166 hsa-mir-191 | PDIA3    | 0.385970075 mirna_pc |
| 27167 hsa-mir-191 | C2orf29  | 0.444309786 mirna_pc |
| 27168 hsa-mir-191 | PLEKHA6  | 0.318396313 mirna_pc |
| 27169 hsa-mir-191 | MRM1     | 0.361389547 mirna_pc |
| 27170 hsa-mir-191 | ACAN     | 0.325869957 mirna_pc |
| 27171 hsa-mir-191 | RFX5     | 0.342282237 mirna_pc |
| 27172 hsa-mir-191 | EPB41L5  | 0.318955236 mirna_pc |
| 27173 hsa-mir-191 | B3GALT6  | 0.394476874 mirna_pc |
| 27174 hsa-mir-191 | IFRD2    | 0.417424069 mirna_pc |
| 27175 hsa-mir-191 | ZNF444   | 0.433913316 mirna_pc |
| 27176 hsa-mir-191 | SUZ12    | 0.437519046 mirna_pc |
| 27177 hsa-mir-191 | ABCC6    | 0.383831669 mirna_pc |
| 27178 hsa-mir-191 | CCL20    | 0.303417316 mirna_pc |
| 27179 hsa-mir-191 | FN3K     | 0.365648211 mirna_pc |
| 27180 hsa-mir-191 | ZBTB12   | 0.477367729 mirna_pc |
| 27181 hsa-mir-191 | SLC12A2  | 0.381965861 mirna_pc |
| 27182 hsa-mir-191 | BCDIN3D  | 0.310191567 mirna_pc |
| 27183 hsa-mir-191 | KLHDC9   | 0.319313671 mirna_pc |
| 27184 hsa-mir-191 | ABHD14B  | 0.342376566 mirna_pc |
| 27185 hsa-mir-191 | KAZALD1  | 0.361268437 mirna_pc |
| 27186 hsa-mir-191 | EPB41    | 0.321547554 mirna_pc |
| 27187 hsa-mir-191 | SLC26A1  | 0.400492746 mirna_pc |
| 27188 hsa-mir-191 | SLC7A7   | 0.34819788 mirna_pc  |
| 27189 hsa-mir-191 | DOK7     | 0.303529841 mirna_pc |
| 27190 hsa-mir-191 | FARSB    | 0.318131904 mirna_pc |
| 27191 hsa-mir-191 | ANKMY2   | 0.322333151 mirna_pc |
| 27192 hsa-mir-191 | PBRM1    | 0.363796881 mirna_pc |
| 27193 hsa-mir-191 | PIK3AP1  | 0.494557547 mirna_pc |
| 27194 hsa-mir-191 | CIB2     | 0.37462053 mirna_pc  |
| 27195 hsa-mir-191 | FAM96A   | 0.418162979 mirna_pc |
| 27196 hsa-mir-191 | ZNF608   | 0.40043816 mirna_pc  |
| 27197 hsa-mir-191 | TOR2A    | 0.310169224 mirna_pc |
| 27198 hsa-mir-191 | TARBP2   | 0.365881032 mirna_pc |
| 27199 hsa-mir-191 | TRIM15   | 0.315216101 mirna_pc |
| 27200 hsa-mir-191 | FGFR10P  | 0.482622301 mirna_pc |
| 27201 hsa-mir-191 | METTL13  | 0.498263708 mirna_pc |
| 27202 hsa-mir-191 | C12orf52 | 0.346094841 mirna_pc |
| 27203 hsa-mir-191 | HACL1    | 0.371368163 mirna_pc |
| 27204 hsa-mir-191 | BPNT1    | 0.33193159 mirna_pc  |
| 27205 hsa-mir-191 | MAN2A2   | 0.407128371 mirna_pc |
| 27206 hsa-mir-191 | POLE     | 0.337737653 mirna_pc |
| 27207 hsa-mir-191 | C1orf163 | 0.400642662 mirna_pc |
| 27208 hsa-mir-191 | WDR6     | 0.483558753 mirna_pc |
| 27209 hsa-mir-191 | MKRN2    | 0.317860968 mirna_pc |
| 27210 hsa-mir-191 | C1orf159 | 0.346245844 mirna_pc |
| 27211 hsa-mir-191 | TRIAP1   | 0.341009529 mirna_pc |
| 27212 hsa-mir-191 | SOX9     | 0.312960625 mirna_pc |
| 27213 hsa-mir-191 | TMEM216  | 0.308670698 mirna_pc |
| 27214 hsa-mir-191 | TMF1     | 0.308136385 mirna_pc |
| 27215 hsa-mir-191 | GAL3ST1  | 0.478192145 mirna_pc |

|                   |           |                      |
|-------------------|-----------|----------------------|
| 27216 hsa-mir-191 | NPRL2     | 0.473682094 mirna_pc |
| 27217 hsa-mir-191 | DDOST     | 0.488709188 mirna_pc |
| 27218 hsa-mir-191 | FAM188B   | 0.374563629 mirna_pc |
| 27219 hsa-mir-191 | GK3P      | 0.330405438 mirna_pc |
| 27220 hsa-mir-191 | RBMX      | 0.31431301 mirna_pc  |
| 27221 hsa-mir-191 | C6orf134  | 0.342237426 mirna_pc |
| 27222 hsa-mir-191 | SEC23IP   | 0.346508342 mirna_pc |
| 27223 hsa-mir-191 | SEPSECS   | 0.327668884 mirna_pc |
| 27224 hsa-mir-191 | GPC3      | 0.319855212 mirna_pc |
| 27225 hsa-mir-191 | PIP5K1B   | 0.306550389 mirna_pc |
| 27226 hsa-mir-191 | QPCTL     | 0.3092117 mirna_pc   |
| 27227 hsa-mir-191 | C9orf142  | 0.319462456 mirna_pc |
| 27228 hsa-mir-191 | PDIA3P    | 0.384716767 mirna_pc |
| 27229 hsa-mir-191 | ARFGEF2   | 0.338660819 mirna_pc |
| 27230 hsa-mir-191 | ATAD3B    | 0.422813067 mirna_pc |
| 27231 hsa-mir-191 | XRCC5     | 0.313448618 mirna_pc |
| 27232 hsa-mir-191 | ABCD1     | 0.320339623 mirna_pc |
| 27233 hsa-mir-191 | MYO5C     | 0.321648092 mirna_pc |
| 27234 hsa-mir-191 | APEH      | 0.395447883 mirna_pc |
| 27235 hsa-mir-191 | ZNF780B   | 0.343392482 mirna_pc |
| 27236 hsa-mir-191 | C19orf61  | 0.358088602 mirna_pc |
| 27237 hsa-mir-191 | STT3B     | 0.341359232 mirna_pc |
| 27238 hsa-mir-191 | C11orf48  | 0.445762269 mirna_pc |
| 27239 hsa-mir-191 | ZNF137    | 0.303661827 mirna_pc |
| 27240 hsa-mir-191 | PDIA6     | 0.300145161 mirna_pc |
| 27241 hsa-mir-191 | SGK2      | 0.347837295 mirna_pc |
| 27242 hsa-mir-191 | PLEKHH1   | 0.33153603 mirna_pc  |
| 27243 hsa-mir-191 | C22orf13  | 0.305776246 mirna_pc |
| 27244 hsa-mir-191 | AIFM1     | 0.361564794 mirna_pc |
| 27245 hsa-mir-191 | SCAP      | 0.31843653 mirna_pc  |
| 27246 hsa-mir-191 | LIMD1     | 0.458070083 mirna_pc |
| 27247 hsa-mir-191 | PTGES2    | 0.368339029 mirna_pc |
| 27248 hsa-mir-191 | LBR       | 0.322530418 mirna_pc |
| 27249 hsa-mir-191 | LOC440905 | 0.309716872 mirna_pc |
| 27250 hsa-mir-191 | PDSS2     | 0.327017506 mirna_pc |
| 27251 hsa-mir-191 | PDXDC1    | 0.357195915 mirna_pc |
| 27252 hsa-mir-191 | NAA40     | 0.399621006 mirna_pc |
| 27253 hsa-mir-191 | LINGO1    | 0.401535514 mirna_pc |
| 27254 hsa-mir-191 | MSX2      | 0.309240458 mirna_pc |
| 27255 hsa-mir-191 | DNAJC14   | 0.463840231 mirna_pc |
| 27256 hsa-mir-191 | C17orf28  | 0.306240632 mirna_pc |
| 27257 hsa-mir-191 | FGFRL1    | 0.450195255 mirna_pc |
| 27258 hsa-mir-191 | PEX11A    | 0.374117349 mirna_pc |
| 27259 hsa-mir-191 | CELSR3    | 0.328969621 mirna_pc |
| 27260 hsa-mir-191 | DTNBP1    | 0.395214827 mirna_pc |
| 27261 hsa-mir-191 | PUSL1     | 0.349009907 mirna_pc |
| 27262 hsa-mir-191 | ABCF1     | 0.334248858 mirna_pc |
| 27263 hsa-mir-191 | CNPY2     | 0.363588024 mirna_pc |
| 27264 hsa-mir-191 | MPV17L    | 0.34086977 mirna_pc  |
| 27265 hsa-mir-191 | FAM136A   | 0.481531756 mirna_pc |
| 27266 hsa-mir-191 | TCTA      | 0.360094863 mirna_pc |
| 27267 hsa-mir-191 | BAIAP2L2  | 0.376863558 mirna_pc |
| 27268 hsa-mir-191 | KDELR1    | 0.328968966 mirna_pc |
| 27269 hsa-mir-191 | C12orf49  | 0.324591406 mirna_pc |

|                   |           |                      |
|-------------------|-----------|----------------------|
| 27270 hsa-mir-191 | TMEM115   | 0.342408009 mirna_pc |
| 27271 hsa-mir-191 | HMG1      | 0.304674392 mirna_pc |
| 27272 hsa-mir-191 | OXNAD1    | 0.421849472 mirna_pc |
| 27273 hsa-mir-191 | PRKCD     | 0.370568505 mirna_pc |
| 27274 hsa-mir-191 | PDE8A     | 0.303221585 mirna_pc |
| 27275 hsa-mir-191 | AGAP1     | 0.350379442 mirna_pc |
| 27276 hsa-mir-191 | ARID3A    | 0.363030414 mirna_pc |
| 27277 hsa-mir-191 | MTPAP     | 0.320217975 mirna_pc |
| 27278 hsa-mir-191 | EIF1AX    | 0.311432725 mirna_pc |
| 27279 hsa-mir-191 | DLG3      | 0.303000053 mirna_pc |
| 27280 hsa-mir-191 | EFCAB4A   | 0.310393799 mirna_pc |
| 27281 hsa-mir-191 | GDPD5     | 0.452990345 mirna_pc |
| 27282 hsa-mir-191 | GIPC2     | 0.373586678 mirna_pc |
| 27283 hsa-mir-191 | GNL3L     | 0.306190971 mirna_pc |
| 27284 hsa-mir-191 | EML4      | 0.449531338 mirna_pc |
| 27285 hsa-mir-191 | BZW2      | 0.321842914 mirna_pc |
| 27286 hsa-mir-191 | QARS      | 0.45479504 mirna_pc  |
| 27287 hsa-mir-191 | ACBD7     | 0.348683082 mirna_pc |
| 27288 hsa-mir-191 | LRPPRC    | 0.324318539 mirna_pc |
| 27289 hsa-mir-191 | C8orf51   | 0.321503978 mirna_pc |
| 27290 hsa-mir-191 | LOC401010 | 0.391855523 mirna_pc |
| 27291 hsa-mir-191 | KRT18     | 0.393959852 mirna_pc |
| 27292 hsa-mir-191 | KBTD11    | 0.338847014 mirna_pc |
| 27293 hsa-mir-191 | STRA13    | 0.304049567 mirna_pc |
| 27294 hsa-mir-191 | RPIA      | 0.364696073 mirna_pc |
| 27295 hsa-mir-191 | CXorf38   | 0.340667125 mirna_pc |
| 27296 hsa-mir-191 | ZNF860    | 0.348584061 mirna_pc |
| 27297 hsa-mir-191 | RNFT2     | 0.39485797 mirna_pc  |
| 27298 hsa-mir-191 | NOTUM     | 0.329045521 mirna_pc |
| 27299 hsa-mir-191 | FUCA1     | 0.346879933 mirna_pc |
| 27300 hsa-mir-191 | CA13      | 0.325056223 mirna_pc |
| 27301 hsa-mir-191 | AP3M1     | 0.315814158 mirna_pc |
| 27302 hsa-mir-191 | MST1P9    | 0.303480395 mirna_pc |
| 27303 hsa-mir-191 | CYB5RL    | 0.328803659 mirna_pc |
| 27304 hsa-mir-191 | ZNF607    | 0.313163424 mirna_pc |
| 27305 hsa-mir-191 | FRAT2     | 0.399291189 mirna_pc |
| 27306 hsa-mir-191 | PRR15L    | 0.308016081 mirna_pc |
| 27307 hsa-mir-191 | C2CD4D    | 0.300666255 mirna_pc |
| 27308 hsa-mir-191 | NAT9      | 0.319952115 mirna_pc |
| 27309 hsa-mir-191 | TMEM98    | 0.36564423 mirna_pc  |
| 27310 hsa-mir-191 | KIAA1731  | 0.357250061 mirna_pc |
| 27311 hsa-mir-191 | SLC27A2   | 0.449535545 mirna_pc |
| 27312 hsa-mir-191 | PNRC2     | 0.423014718 mirna_pc |
| 27313 hsa-mir-191 | SPCS1     | 0.462652013 mirna_pc |
| 27314 hsa-mir-191 | SFXN4     | 0.431060107 mirna_pc |
| 27315 hsa-mir-191 | ZNF619    | 0.354449583 mirna_pc |
| 27316 hsa-mir-191 | NDUFS2    | 0.414096586 mirna_pc |
| 27317 hsa-mir-191 | SLC35B3   | 0.363863427 mirna_pc |
| 27318 hsa-mir-191 | OXSM      | 0.313340142 mirna_pc |
| 27319 hsa-mir-191 | FRAT1     | 0.449697276 mirna_pc |
| 27320 hsa-mir-191 | HNF1B     | 0.464258128 mirna_pc |
| 27321 hsa-mir-191 | MINPP1    | 0.387901415 mirna_pc |
| 27322 hsa-mir-191 | GATM      | 0.373964065 mirna_pc |
| 27323 hsa-mir-191 | RANBP17   | 0.385037711 mirna_pc |

|                   |           |                      |
|-------------------|-----------|----------------------|
| 27324 hsa-mir-191 | TMEM180   | 0.453023215 mirna_pc |
| 27325 hsa-mir-191 | ProSAPiP1 | 0.343081855 mirna_pc |
| 27326 hsa-mir-191 | LACTB2    | 0.328339917 mirna_pc |
| 27327 hsa-mir-191 | MRE11A    | 0.315979249 mirna_pc |
| 27328 hsa-mir-191 | QRICH1    | 0.374826525 mirna_pc |
| 27329 hsa-mir-191 | LTK       | 0.334725724 mirna_pc |
| 27330 hsa-mir-191 | LRRC27    | 0.343231977 mirna_pc |
| 27331 hsa-mir-191 | GOSR1     | 0.361461156 mirna_pc |
| 27332 hsa-mir-191 | ACOT4     | 0.363410927 mirna_pc |
| 27333 hsa-mir-191 | USP37     | 0.315464706 mirna_pc |
| 27334 hsa-mir-191 | ZNF84     | 0.307725207 mirna_pc |
| 27335 hsa-mir-191 | TMEM179B  | 0.325240758 mirna_pc |
| 27336 hsa-mir-191 | TMEM106C  | 0.375920343 mirna_pc |
| 27337 hsa-mir-191 | CTNNB1    | 0.300370553 mirna_pc |
| 27338 hsa-mir-191 | DAGLA     | 0.494027505 mirna_pc |
| 27339 hsa-mir-191 | SPATA2    | 0.41596126 mirna_pc  |
| 27340 hsa-mir-191 | CRLS1     | 0.429592862 mirna_pc |
| 27341 hsa-mir-191 | DHX30     | 0.513803285 mirna_pc |
| 27342 hsa-mir-191 | GYG2      | 0.417639334 mirna_pc |
| 27343 hsa-mir-191 | GANAB     | 0.303419149 mirna_pc |
| 27344 hsa-mir-191 | AVL9      | 0.359683932 mirna_pc |
| 27345 hsa-mir-191 | ZNF620    | 0.519611272 mirna_pc |
| 27346 hsa-mir-191 | RNF34     | 0.443569042 mirna_pc |
| 27347 hsa-mir-191 | CHD7      | 0.395407984 mirna_pc |
| 27348 hsa-mir-191 | PANK1     | 0.464038569 mirna_pc |
| 27349 hsa-mir-191 | ALAS1     | 0.39580749 mirna_pc  |
| 27350 hsa-mir-191 | CD164     | 0.336146765 mirna_pc |
| 27351 hsa-mir-191 | TOX3      | 0.315483469 mirna_pc |
| 27352 hsa-mir-191 | SUCLG1    | 0.3266441 mirna_pc   |
| 27353 hsa-mir-191 | AGPHD1    | 0.37527056 mirna_pc  |
| 27354 hsa-mir-191 | SEC61A2   | 0.443600081 mirna_pc |
| 27355 hsa-mir-191 | DYX1C1    | 0.33619925 mirna_pc  |
| 27356 hsa-mir-191 | PSPC1     | 0.382919433 mirna_pc |
| 27357 hsa-mir-191 | COPZ1     | 0.343514018 mirna_pc |
| 27358 hsa-mir-191 | REEP6     | 0.30964002 mirna_pc  |
| 27359 hsa-mir-191 | ZNF35     | 0.489717357 mirna_pc |
| 27360 hsa-mir-191 | MAPKAPK5  | 0.476212435 mirna_pc |
| 27361 hsa-mir-191 | GMCL1     | 0.539250066 mirna_pc |
| 27362 hsa-mir-191 | DDAH1     | 0.438285411 mirna_pc |
| 27363 hsa-mir-191 | KDELRL2   | 0.300833992 mirna_pc |
| 27364 hsa-mir-191 | PCSK6     | 0.307198824 mirna_pc |
| 27365 hsa-mir-191 | ZNF100    | 0.317936787 mirna_pc |
| 27366 hsa-mir-191 | ZNF833    | 0.446108363 mirna_pc |
| 27367 hsa-mir-191 | RHPN1     | 0.307922165 mirna_pc |
| 27368 hsa-mir-191 | SLC25A15  | 0.365197727 mirna_pc |
| 27369 hsa-mir-191 | Clorf77   | 0.314603282 mirna_pc |
| 27370 hsa-mir-191 | CCHCR1    | 0.316807489 mirna_pc |
| 27371 hsa-mir-191 | CHKA      | 0.373592046 mirna_pc |
| 27372 hsa-mir-191 | RASSF1    | 0.406805698 mirna_pc |
| 27373 hsa-mir-191 | B4GALT3   | 0.392609351 mirna_pc |
| 27374 hsa-mir-191 | NADK      | 0.356264755 mirna_pc |
| 27375 hsa-mir-191 | SFRS13A   | 0.314994522 mirna_pc |
| 27376 hsa-mir-191 | DENND5B   | 0.304598092 mirna_pc |
| 27377 hsa-mir-191 | SS18L2    | 0.300217969 mirna_pc |

|                   |           |                      |
|-------------------|-----------|----------------------|
| 27378 hsa-mir-191 | TGDS      | 0.313414072 mirna_pc |
| 27379 hsa-mir-191 | HGD       | 0.312192305 mirna_pc |
| 27380 hsa-mir-191 | TFAM      | 0.50643584 mirna_pc  |
| 27381 hsa-mir-191 | ANXA4     | 0.379412384 mirna_pc |
| 27382 hsa-mir-191 | MACC1     | 0.315665501 mirna_pc |
| 27383 hsa-mir-191 | TTC38     | 0.362956402 mirna_pc |
| 27384 hsa-mir-191 | ZNF321    | 0.341744222 mirna_pc |
| 27385 hsa-mir-191 | NME6      | 0.415884398 mirna_pc |
| 27386 hsa-mir-191 | ORC4L     | 0.308469914 mirna_pc |
| 27387 hsa-mir-191 | EAF1      | 0.419542237 mirna_pc |
| 27388 hsa-mir-191 | MORF4L1   | 0.304968302 mirna_pc |
| 27389 hsa-mir-191 | SLC29A2   | 0.378754285 mirna_pc |
| 27390 hsa-mir-191 | CHCHD4    | 0.317397738 mirna_pc |
| 27391 hsa-mir-191 | LOC222699 | 0.352293261 mirna_pc |
| 27392 hsa-mir-191 | COX19     | 0.414038501 mirna_pc |
| 27393 hsa-mir-191 | IDH1      | 0.356088608 mirna_pc |
| 27394 hsa-mir-191 | SMC1A     | 0.317418478 mirna_pc |
| 27395 hsa-mir-191 | FNBP1L    | 0.349862744 mirna_pc |
| 27396 hsa-mir-191 | SLC44A3   | 0.327273671 mirna_pc |
| 27397 hsa-mir-191 | ZDHHHC9   | 0.308516719 mirna_pc |
| 27398 hsa-mir-191 | SORD      | 0.305476706 mirna_pc |
| 27399 hsa-mir-191 | GTPBP5    | 0.463853696 mirna_pc |
| 27400 hsa-mir-191 | SHROOM1   | 0.366056833 mirna_pc |
| 27401 hsa-mir-191 | UBE2CBP   | 0.377099453 mirna_pc |
| 27402 hsa-mir-191 | C4orf19   | 0.31645079 mirna_pc  |
| 27403 hsa-mir-191 | MGAT4A    | 0.367823437 mirna_pc |
| 27404 hsa-mir-191 | ACVR2B    | 0.422774361 mirna_pc |
| 27405 hsa-mir-191 | NEK8      | 0.300339899 mirna_pc |
| 27406 hsa-mir-191 | SATB2     | 0.338639288 mirna_pc |
| 27407 hsa-mir-191 | ICA1      | 0.409350284 mirna_pc |
| 27408 hsa-mir-191 | SSBP4     | 0.332645211 mirna_pc |
| 27409 hsa-mir-191 | POGZ      | 0.312066202 mirna_pc |
| 27410 hsa-mir-191 | ZNF702P   | 0.343639289 mirna_pc |
| 27411 hsa-mir-191 | BIN1      | 0.313649151 mirna_pc |
| 27412 hsa-mir-191 | SMUG1     | 0.353508892 mirna_pc |
| 27413 hsa-mir-191 | DCP1A     | 0.539331973 mirna_pc |
| 27414 hsa-mir-191 | CLDN3     | 0.419433769 mirna_pc |
| 27415 hsa-mir-191 | GNL3      | 0.61441602 mirna_pc  |
| 27416 hsa-mir-191 | METTL7B   | 0.526984136 mirna_pc |
| 27417 hsa-mir-191 | PHKA2     | 0.320927076 mirna_pc |
| 27418 hsa-mir-191 | ZNF518A   | 0.365957883 mirna_pc |
| 27419 hsa-mir-191 | PLEKHA8   | 0.303586238 mirna_pc |
| 27420 hsa-mir-191 | NSMCE4A   | 0.380488059 mirna_pc |
| 27421 hsa-mir-191 | PYCR1     | 0.311559491 mirna_pc |
| 27422 hsa-mir-191 | PKN3      | 0.319426823 mirna_pc |
| 27423 hsa-mir-191 | BCORL1    | 0.358860016 mirna_pc |
| 27424 hsa-mir-191 | AKR7A2    | 0.30510943 mirna_pc  |
| 27425 hsa-mir-191 | C9orf100  | 0.384738436 mirna_pc |
| 27426 hsa-mir-191 | SERPINF2  | 0.353630582 mirna_pc |
| 27427 hsa-mir-191 | HCG18     | 0.377944089 mirna_pc |
| 27428 hsa-mir-191 | SLC25A19  | 0.361456421 mirna_pc |
| 27429 hsa-mir-191 | BEND3     | 0.553405688 mirna_pc |
| 27430 hsa-mir-191 | HIBADH    | 0.321087682 mirna_pc |
| 27431 hsa-mir-191 | ARHGEF16  | 0.316097345 mirna_pc |



|       |             |                 |             |          |
|-------|-------------|-----------------|-------------|----------|
| 27432 | hsa-mir-191 | CA5BP           | 0.355236647 | mirna_pc |
| 27433 | hsa-mir-191 | RAVER2          | 0.359737279 | mirna_pc |
| 27434 | hsa-mir-191 | FZD5            | 0.548624606 | mirna_pc |
| 27435 | hsa-mir-191 | AAMP            | 0.315856423 | mirna_pc |
| 27436 | hsa-mir-191 | FLJ10213        | 0.308635692 | mirna_pc |
| 27437 | hsa-mir-191 | FGFR4           | 0.518209969 | mirna_pc |
| 27438 | hsa-mir-191 | LOC151534       | 0.379123732 | mirna_pc |
| 27439 | hsa-mir-191 | AQP11           | 0.358708551 | mirna_pc |
| 27440 | hsa-mir-191 | NFXL1           | 0.364891991 | mirna_pc |
| 27441 | hsa-mir-191 | CNNM4           | 0.363321835 | mirna_pc |
| 27442 | hsa-mir-191 | KCTD14          | 0.377378391 | mirna_pc |
| 27443 | hsa-mir-191 | VPS33A          | 0.360499935 | mirna_pc |
| 27444 | hsa-mir-191 | CCDC78          | 0.34076443  | mirna_pc |
| 27445 | hsa-mir-191 | SARS2           | 0.373734641 | mirna_pc |
| 27446 | hsa-mir-191 | RAB20           | 0.337712741 | mirna_pc |
| 27447 | hsa-mir-191 | LRRC45          | 0.35239572  | mirna_pc |
| 27448 | hsa-mir-191 | RBM38           | 0.323278484 | mirna_pc |
| 27449 | hsa-mir-191 | GHDC            | 0.347334434 | mirna_pc |
| 27450 | hsa-mir-191 | CXXC5           | 0.382411892 | mirna_pc |
| 27451 | hsa-mir-191 | CCAR1           | 0.308427917 | mirna_pc |
| 27452 | hsa-mir-191 | VHL             | 0.314819834 | mirna_pc |
| 27453 | hsa-mir-191 | SLC35A1         | 0.351235176 | mirna_pc |
| 27454 | hsa-mir-191 | ITPKA           | 0.418679021 | mirna_pc |
| 27455 | hsa-mir-191 | C3orf63         | 0.348146014 | mirna_pc |
| 27456 | hsa-mir-191 | SLC5A1          | 0.306183878 | mirna_pc |
| 27457 | hsa-mir-191 | ZNF184          | 0.30038372  | mirna_pc |
| 27458 | hsa-mir-191 | ATXN2           | 0.377629729 | mirna_pc |
| 27459 | hsa-mir-191 | TPRN            | 0.310261926 | mirna_pc |
| 27460 | hsa-mir-191 | LIMS3-LOC440895 | 0.300343844 | mirna_pc |
| 27461 | hsa-mir-191 | ATP7B           | 0.492082984 | mirna_pc |
| 27462 | hsa-mir-191 | CNOT10          | 0.431258817 | mirna_pc |
| 27463 | hsa-mir-191 | ECHS1           | 0.342717924 | mirna_pc |
| 27464 | hsa-mir-191 | ERN 2.00        | 0.305049096 | mirna_pc |
| 27465 | hsa-mir-191 | SFMBT1          | 0.586984312 | mirna_pc |
| 27466 | hsa-mir-191 | AKAP7           | 0.313660752 | mirna_pc |
| 27467 | hsa-mir-191 | FITM2           | 0.315138702 | mirna_pc |
| 27468 | hsa-mir-191 | ATP9A           | 0.302122281 | mirna_pc |
| 27469 | hsa-mir-191 | CHMP4C          | 0.309523017 | mirna_pc |
| 27470 | hsa-mir-191 | GGT1            | 0.483951881 | mirna_pc |
| 27471 | hsa-mir-191 | C10orf81        | 0.311029585 | mirna_pc |
| 27472 | hsa-mir-191 | C6orf130        | 0.417024708 | mirna_pc |
| 27473 | hsa-mir-191 | ZSCAN16         | 0.43880233  | mirna_pc |
| 27474 | hsa-mir-191 | SLC17A5         | 0.425202016 | mirna_pc |
| 27475 | hsa-mir-191 | RPS6KA3         | 0.379676864 | mirna_pc |
| 27476 | hsa-mir-191 | ZNF814          | 0.301044377 | mirna_pc |
| 27477 | hsa-mir-191 | DGAT1           | 0.33461038  | mirna_pc |
| 27478 | hsa-mir-191 | TDRKH           | 0.398772023 | mirna_pc |
| 27479 | hsa-mir-191 | ZNF780A         | 0.505584003 | mirna_pc |
| 27480 | hsa-mir-191 | FAM109A         | 0.381535595 | mirna_pc |
| 27481 | hsa-mir-191 | ZNF214          | 0.300297473 | mirna_pc |
| 27482 | hsa-mir-191 | NEU3            | 0.360346318 | mirna_pc |
| 27483 | hsa-mir-191 | LOC147804       | 0.359830953 | mirna_pc |
| 27484 | hsa-mir-191 | SYAP1           | 0.341637565 | mirna_pc |
| 27485 | hsa-mir-191 | DAG1            | 0.450939316 | mirna_pc |

|                   |          |                      |
|-------------------|----------|----------------------|
| 27486 hsa-mir-191 | ACAA2    | 0.332473725 mirna_pc |
| 27487 hsa-mir-191 | CHDH     | 0.641526092 mirna_pc |
| 27488 hsa-mir-191 | SLC43A3  | 0.38219171 mirna_pc  |
| 27489 hsa-mir-191 | ZNF816A  | 0.391369546 mirna_pc |
| 27490 hsa-mir-191 | C2orf24  | 0.318980509 mirna_pc |
| 27491 hsa-mir-191 | KIF21B   | 0.370176715 mirna_pc |
| 27492 hsa-mir-191 | EEF1E1   | 0.359296554 mirna_pc |
| 27493 hsa-mir-191 | ZNF697   | 0.320700768 mirna_pc |
| 27494 hsa-mir-191 | MRPL44   | 0.410926716 mirna_pc |
| 27495 hsa-mir-191 | PTCD3    | 0.316398392 mirna_pc |
| 27496 hsa-mir-191 | MST1P2   | 0.353075256 mirna_pc |
| 27497 hsa-mir-191 | SPRY4    | 0.363767452 mirna_pc |
| 27498 hsa-mir-191 | PPARG    | 0.31448167 mirna_pc  |
| 27499 hsa-mir-191 | GJB1     | 0.531117666 mirna_pc |
| 27500 hsa-mir-191 | ERGIC3   | 0.336101797 mirna_pc |
| 27501 hsa-mir-191 | CASP6    | 0.416290026 mirna_pc |
| 27502 hsa-mir-191 | ZNF92    | 0.304337666 mirna_pc |
| 27503 hsa-mir-191 | ANXA9    | 0.411478829 mirna_pc |
| 27504 hsa-mir-191 | TMTC4    | 0.343619425 mirna_pc |
| 27505 hsa-mir-191 | MMP15    | 0.320919997 mirna_pc |
| 27506 hsa-mir-191 | CYP2J2   | 0.333387732 mirna_pc |
| 27507 hsa-mir-191 | CTR9     | 0.308411409 mirna_pc |
| 27508 hsa-mir-191 | CDH17    | 0.302781958 mirna_pc |
| 27509 hsa-mir-191 | ACY1     | 0.456574984 mirna_pc |
| 27510 hsa-mir-191 | DNAJC1   | 0.35638197 mirna_pc  |
| 27511 hsa-mir-191 | SDHB     | 0.321792728 mirna_pc |
| 27512 hsa-mir-191 | C17orf86 | 0.30278184 mirna_pc  |
| 27513 hsa-mir-191 | ZNF259   | 0.340631623 mirna_pc |
| 27514 hsa-mir-191 | SSU72    | 0.303405055 mirna_pc |
| 27515 hsa-mir-191 | LZTFL1   | 0.340390317 mirna_pc |
| 27516 hsa-mir-191 | GPR114   | 0.330594416 mirna_pc |
| 27517 hsa-mir-191 | ALG14    | 0.337358212 mirna_pc |
| 27518 hsa-mir-191 | RPS6KL1  | 0.362841701 mirna_pc |
| 27519 hsa-mir-191 | GLYCTK   | 0.578631297 mirna_pc |
| 27520 hsa-mir-191 | ARF4     | 0.320823021 mirna_pc |
| 27521 hsa-mir-191 | ERP29    | 0.334836319 mirna_pc |
| 27522 hsa-mir-191 | DDAH2    | 0.487525522 mirna_pc |
| 27523 hsa-mir-191 | GALE     | 0.302412384 mirna_pc |
| 27524 hsa-mir-191 | FDXACB1  | 0.306918201 mirna_pc |
| 27525 hsa-mir-191 | NEK4     | 0.626892614 mirna_pc |
| 27526 hsa-mir-191 | TJP3     | 0.312071085 mirna_pc |
| 27527 hsa-mir-191 | PIGT     | 0.404290955 mirna_pc |
| 27528 hsa-mir-191 | CNNM3    | 0.534188351 mirna_pc |
| 27529 hsa-mir-191 | SIGIRR   | 0.329052563 mirna_pc |
| 27530 hsa-mir-191 | ALG11    | 0.375089918 mirna_pc |
| 27531 hsa-mir-191 | MCCC2    | 0.332614783 mirna_pc |
| 27532 hsa-mir-191 | TSPAN13  | 0.322287445 mirna_pc |
| 27533 hsa-mir-191 | MLXIPL   | 0.336483522 mirna_pc |
| 27534 hsa-mir-191 | HKDC1    | 0.359903048 mirna_pc |
| 27535 hsa-mir-191 | TMED4    | 0.4113986 mirna_pc   |
| 27536 hsa-mir-191 | ZSWIM5   | 0.326407443 mirna_pc |
| 27537 hsa-mir-191 | ZNF233   | 0.451889426 mirna_pc |
| 27538 hsa-mir-191 | PCMTD2   | 0.378404033 mirna_pc |
| 27539 hsa-mir-191 | GET4     | 0.3636618 mirna_pc   |

|                   |           |                      |
|-------------------|-----------|----------------------|
| 27540 hsa-mir-191 | HAAO      | 0.358620658 mirna_pc |
| 27541 hsa-mir-191 | PVR       | 0.313988804 mirna_pc |
| 27542 hsa-mir-191 | CCRL2     | 0.315045944 mirna_pc |
| 27543 hsa-mir-191 | DPAGT1    | 0.425407941 mirna_pc |
| 27544 hsa-mir-191 | YBX2      | 0.44615098 mirna_pc  |
| 27545 hsa-mir-191 | PDDC1     | 0.310872374 mirna_pc |
| 27546 hsa-mir-191 | ASL       | 0.389617033 mirna_pc |
| 27547 hsa-mir-191 | GPR137C   | 0.338296911 mirna_pc |
| 27548 hsa-mir-191 | GCA       | 0.352503012 mirna_pc |
| 27549 hsa-mir-191 | NUP43     | 0.422996892 mirna_pc |
| 27550 hsa-mir-191 | MMACHC    | 0.4076744 mirna_pc   |
| 27551 hsa-mir-191 | RTN3      | 0.348216459 mirna_pc |
| 27552 hsa-mir-191 | RNF41     | 0.396231853 mirna_pc |
| 27553 hsa-mir-191 | ZNF124    | 0.504287148 mirna_pc |
| 27554 hsa-mir-191 | DGAT2     | 0.417702844 mirna_pc |
| 27555 hsa-mir-191 | TMEM62    | 0.533797385 mirna_pc |
| 27556 hsa-mir-191 | EIF2C1    | 0.322593579 mirna_pc |
| 27557 hsa-mir-191 | ATE1      | 0.318648304 mirna_pc |
| 27558 hsa-mir-191 | ZNF611    | 0.362382935 mirna_pc |
| 27559 hsa-mir-191 | GUSB      | 0.364558032 mirna_pc |
| 27560 hsa-mir-191 | AIFM2     | 0.301237905 mirna_pc |
| 27561 hsa-mir-191 | TGOLN2    | 0.308876095 mirna_pc |
| 27562 hsa-mir-191 | LARS2     | 0.364802007 mirna_pc |
| 27563 hsa-mir-191 | GRB14     | 0.414346719 mirna_pc |
| 27564 hsa-mir-191 | NFYA      | 0.300641462 mirna_pc |
| 27565 hsa-mir-191 | CHD1L     | 0.439272421 mirna_pc |
| 27566 hsa-mir-191 | ZNF473    | 0.438487309 mirna_pc |
| 27567 hsa-mir-191 | FUCA2     | 0.343171863 mirna_pc |
| 27568 hsa-mir-191 | KIAA1211  | 0.307240185 mirna_pc |
| 27569 hsa-mir-191 | EPS8L3    | 0.407635285 mirna_pc |
| 27570 hsa-mir-191 | CEACAM5   | 0.300779894 mirna_pc |
| 27571 hsa-mir-191 | RFT1      | 0.459082936 mirna_pc |
| 27572 hsa-mir-191 | DCLRE1A   | 0.469342108 mirna_pc |
| 27573 hsa-mir-191 | RNF5      | 0.457356731 mirna_pc |
| 27574 hsa-mir-191 | ANP32A    | 0.423910372 mirna_pc |
| 27575 hsa-mir-191 | C11orf75  | 0.368167495 mirna_pc |
| 27576 hsa-mir-191 | ATP10B    | 0.306795938 mirna_pc |
| 27577 hsa-mir-191 | E2F5      | 0.543144629 mirna_pc |
| 27578 hsa-mir-191 | TMED5     | 0.302413888 mirna_pc |
| 27579 hsa-mir-191 | PIH1D1    | 0.316072435 mirna_pc |
| 27580 hsa-mir-191 | BACE2     | 0.303103808 mirna_pc |
| 27581 hsa-mir-191 | SEPHS2    | 0.481054095 mirna_pc |
| 27582 hsa-mir-191 | TNFRSF10D | 0.309798154 mirna_pc |
| 27583 hsa-mir-191 | ZNF195    | 0.389204043 mirna_pc |
| 27584 hsa-mir-191 | REPIN1    | 0.315999188 mirna_pc |
| 27585 hsa-mir-191 | LGALS4    | 0.393661934 mirna_pc |
| 27586 hsa-mir-191 | P2RX4     | 0.351925562 mirna_pc |
| 27587 hsa-mir-191 | MANF      | 0.350047242 mirna_pc |
| 27588 hsa-mir-191 | ZNF320    | 0.361941246 mirna_pc |
| 27589 hsa-mir-191 | ACP6      | 0.353189863 mirna_pc |
| 27590 hsa-mir-191 | HYLS1     | 0.336110772 mirna_pc |
| 27591 hsa-mir-191 | HSD17B11  | 0.342217035 mirna_pc |
| 27592 hsa-mir-191 | HIC2      | 0.316401583 mirna_pc |
| 27593 hsa-mir-191 | UBE2J2    | 0.364346842 mirna_pc |

|                   |           |                      |
|-------------------|-----------|----------------------|
| 27594 hsa-mir-191 | OXER1     | 0.333777472 mirna_pc |
| 27595 hsa-mir-191 | C1orf93   | 0.34634139 mirna_pc  |
| 27596 hsa-mir-191 | SMG5      | 0.341540707 mirna_pc |
| 27597 hsa-mir-191 | B4GALT6   | 0.363352462 mirna_pc |
| 27598 hsa-mir-191 | GLT8D1    | 0.409496268 mirna_pc |
| 27599 hsa-mir-191 | KIF3B     | 0.427512755 mirna_pc |
| 27600 hsa-mir-191 | NLRP2     | 0.325093249 mirna_pc |
| 27601 hsa-mir-191 | SERPINA1  | 0.325837201 mirna_pc |
| 27602 hsa-mir-191 | SFXN2     | 0.401165595 mirna_pc |
| 27603 hsa-mir-191 | VIL1      | 0.531481546 mirna_pc |
| 27604 hsa-mir-191 | ASRGL1    | 0.434080782 mirna_pc |
| 27605 hsa-mir-191 | USP3      | 0.305556323 mirna_pc |
| 27606 hsa-mir-191 | VPRBP     | 0.417537449 mirna_pc |
| 27607 hsa-mir-191 | TMEM170A  | 0.390495667 mirna_pc |
| 27608 hsa-mir-191 | GLT25D2   | 0.318830215 mirna_pc |
| 27609 hsa-mir-191 | PHF16     | 0.501211812 mirna_pc |
| 27610 hsa-mir-191 | BAT5      | 0.402143086 mirna_pc |
| 27611 hsa-mir-191 | ELL3      | 0.395715276 mirna_pc |
| 27612 hsa-mir-191 | BUD13     | 0.315721147 mirna_pc |
| 27613 hsa-mir-191 | PTPLAD1   | 0.419399237 mirna_pc |
| 27614 hsa-mir-191 | TMEM125   | 0.342158487 mirna_pc |
| 27615 hsa-mir-191 | MANEAL    | 0.436512149 mirna_pc |
| 27616 hsa-mir-191 | ZNF587    | 0.323258428 mirna_pc |
| 27617 hsa-mir-191 | APAF1     | 0.383794738 mirna_pc |
| 27618 hsa-mir-191 | GMDS      | 0.305214603 mirna_pc |
| 27619 hsa-mir-191 | MBNL3     | 0.342589385 mirna_pc |
| 27620 hsa-mir-191 | AMOT      | 0.326518394 mirna_pc |
| 27621 hsa-mir-191 | MNS1      | 0.302578962 mirna_pc |
| 27622 hsa-mir-191 | ZNF485    | 0.454374394 mirna_pc |
| 27623 hsa-mir-191 | KIN       | 0.346204874 mirna_pc |
| 27624 hsa-mir-191 | CMC1      | 0.428559295 mirna_pc |
| 27625 hsa-mir-191 | ABHD12    | 0.369070329 mirna_pc |
| 27626 hsa-mir-191 | NAIF1     | 0.309308073 mirna_pc |
| 27627 hsa-mir-191 | FCGRT     | 0.312971134 mirna_pc |
| 27628 hsa-mir-191 | RINL      | 0.378400716 mirna_pc |
| 27629 hsa-mir-191 | TRUB1     | 0.308263178 mirna_pc |
| 27630 hsa-mir-191 | C2orf15   | 0.556855879 mirna_pc |
| 27631 hsa-mir-191 | SLFN13    | 0.339654706 mirna_pc |
| 27632 hsa-mir-191 | LYRM2     | 0.341166869 mirna_pc |
| 27633 hsa-mir-191 | CCNJ      | 0.536333647 mirna_pc |
| 27634 hsa-mir-191 | FOXA2     | 0.484756552 mirna_pc |
| 27635 hsa-mir-191 | GALM      | 0.422966968 mirna_pc |
| 27636 hsa-mir-191 | C6orf64   | 0.34358988 mirna_pc  |
| 27637 hsa-mir-191 | DNAJC16   | 0.378965704 mirna_pc |
| 27638 hsa-mir-191 | OTUD3     | 0.363256812 mirna_pc |
| 27639 hsa-mir-191 | LOC646762 | 0.421623287 mirna_pc |
| 27640 hsa-mir-191 | GDF15     | 0.440105255 mirna_pc |
| 27641 hsa-mir-191 | AFMID     | 0.30886144 mirna_pc  |
| 27642 hsa-mir-191 | GMPPA     | 0.301671334 mirna_pc |
| 27643 hsa-mir-191 | DTX4      | 0.459293672 mirna_pc |
| 27644 hsa-mir-191 | HINFP     | 0.301065355 mirna_pc |
| 27645 hsa-mir-191 | C10orf137 | 0.397890858 mirna_pc |
| 27646 hsa-mir-191 | RPUSD3    | 0.308222502 mirna_pc |
| 27647 hsa-mir-191 | CAMK2N1   | 0.339415812 mirna_pc |

|       |             |           |             |          |
|-------|-------------|-----------|-------------|----------|
| 27648 | hsa-mir-191 | LCA5L     | 0.302985873 | mirna_pc |
| 27649 | hsa-mir-191 | TMEM52    | 0.396054268 | mirna_pc |
| 27650 | hsa-mir-191 | TMEM53    | 0.434421291 | mirna_pc |
| 27651 | hsa-mir-191 | SDF4      | 0.338373016 | mirna_pc |
| 27652 | hsa-mir-191 | USH1C     | 0.439211186 | mirna_pc |
| 27653 | hsa-mir-191 | TSPAN15   | 0.306931401 | mirna_pc |
| 27654 | hsa-mir-191 | TRIM24    | 0.329948757 | mirna_pc |
| 27655 | hsa-mir-191 | IMPDH2    | 0.383813719 | mirna_pc |
| 27656 | hsa-mir-191 | FAM171A1  | 0.43909068  | mirna_pc |
| 27657 | hsa-mir-191 | CFTR      | 0.321861991 | mirna_pc |
| 27658 | hsa-mir-191 | RRBP1     | 0.308752469 | mirna_pc |
| 27659 | hsa-mir-191 | JRK       | 0.303593718 | mirna_pc |
| 27660 | hsa-mir-191 | MLEC      | 0.458094889 | mirna_pc |
| 27661 | hsa-mir-191 | ACE2      | 0.317952609 | mirna_pc |
| 27662 | hsa-mir-191 | UFC1      | 0.418286576 | mirna_pc |
| 27663 | hsa-mir-191 | CCDC134   | 0.35796666  | mirna_pc |
| 27664 | hsa-mir-191 | MOSC1     | 0.350065376 | mirna_pc |
| 27665 | hsa-mir-191 | RNF157    | 0.458214046 | mirna_pc |
| 27666 | hsa-mir-191 | RTN4IP1   | 0.312571497 | mirna_pc |
| 27667 | hsa-mir-191 | CALML4    | 0.325249828 | mirna_pc |
| 27668 | hsa-mir-191 | RAB11FIP4 | 0.423871491 | mirna_pc |
| 27669 | hsa-mir-191 | HS2ST1    | 0.448407422 | mirna_pc |
| 27670 | hsa-mir-191 | SLC25A33  | 0.549761156 | mirna_pc |
| 27671 | hsa-mir-191 | C20orf134 | 0.341223131 | mirna_pc |
| 27672 | hsa-mir-191 | CMTM8     | 0.480774639 | mirna_pc |
| 27673 | hsa-mir-191 | PLS1      | 0.311985604 | mirna_pc |
| 27674 | hsa-mir-191 | CPD       | 0.322795652 | mirna_pc |
| 27675 | hsa-mir-191 | MNX1      | 0.393753282 | mirna_pc |
| 27676 | hsa-mir-191 | ACBD5     | 0.410150943 | mirna_pc |
| 27677 | hsa-mir-191 | RAB15     | 0.309979783 | mirna_pc |
| 27678 | hsa-mir-191 | GTF2H2C   | 0.403584415 | mirna_pc |
| 27679 | hsa-mir-191 | SMARCC1   | 0.467629491 | mirna_pc |
| 27680 | hsa-mir-191 | DAK       | 0.302134361 | mirna_pc |
| 27681 | hsa-mir-191 | SUSD1     | 0.337387139 | mirna_pc |
| 27682 | hsa-mir-191 | C2orf72   | 0.551628481 | mirna_pc |
| 27683 | hsa-mir-191 | NR5A2     | 0.550904324 | mirna_pc |
| 27684 | hsa-mir-191 | C6orf192  | 0.348168054 | mirna_pc |
| 27685 | hsa-mir-191 | CTPS2     | 0.501540683 | mirna_pc |
| 27686 | hsa-mir-191 | SPHK2     | 0.348569147 | mirna_pc |
| 27687 | hsa-mir-191 | KIF9      | 0.551445631 | mirna_pc |
| 27688 | hsa-mir-191 | GXYLT1    | 0.455196299 | mirna_pc |
| 27689 | hsa-mir-191 | C10orf88  | 0.423737564 | mirna_pc |
| 27690 | hsa-mir-191 | MRPL20    | 0.343928596 | mirna_pc |
| 27691 | hsa-mir-191 | HNF1A     | 0.551092408 | mirna_pc |
| 27692 | hsa-mir-191 | TSEN2     | 0.429797459 | mirna_pc |
| 27693 | hsa-mir-191 | C20orf46  | 0.426916123 | mirna_pc |
| 27694 | hsa-mir-191 | KRT8      | 0.394064085 | mirna_pc |
| 27695 | hsa-mir-191 | PDX1      | 0.367969821 | mirna_pc |
| 27696 | hsa-mir-191 | C21orf59  | 0.339853953 | mirna_pc |
| 27697 | hsa-mir-191 | OCLN      | 0.41598333  | mirna_pc |
| 27698 | hsa-mir-191 | PPP1R16A  | 0.366668919 | mirna_pc |
| 27699 | hsa-mir-191 | GTF2H2    | 0.321052473 | mirna_pc |
| 27700 | hsa-mir-191 | ZNF232    | 0.32615567  | mirna_pc |
| 27701 | hsa-mir-191 | MDN1      | 0.346773947 | mirna_pc |

|                   |              |                      |
|-------------------|--------------|----------------------|
| 27702 hsa-mir-191 | KIF12        | 0.412957469 mirna_pc |
| 27703 hsa-mir-191 | RNF32        | 0.311506361 mirna_pc |
| 27704 hsa-mir-191 | ZNF792       | 0.338218693 mirna_pc |
| 27705 hsa-mir-191 | BMI1         | 0.382600228 mirna_pc |
| 27706 hsa-mir-191 | C20orf118    | 0.304963361 mirna_pc |
| 27707 hsa-mir-191 | GFPT1        | 0.390628715 mirna_pc |
| 27708 hsa-mir-191 | METTL10      | 0.305242077 mirna_pc |
| 27709 hsa-mir-191 | CYB561D2     | 0.500882627 mirna_pc |
| 27710 hsa-mir-191 | MRPL16       | 0.309552868 mirna_pc |
| 27711 hsa-mir-191 | METTL12      | 0.410114937 mirna_pc |
| 27712 hsa-mir-191 | ENO3         | 0.385584183 mirna_pc |
| 27713 hsa-mir-191 | TMPRSS3      | 0.31016395 mirna_pc  |
| 27714 hsa-mir-191 | HAPLN1       | 0.33014353 mirna_pc  |
| 27715 hsa-mir-191 | NHEJ1        | 0.355076837 mirna_pc |
| 27716 hsa-mir-191 | ALDH5A1      | 0.344276443 mirna_pc |
| 27717 hsa-mir-191 | QRS1         | 0.322919637 mirna_pc |
| 27718 hsa-mir-191 | FANCF        | 0.334286408 mirna_pc |
| 27719 hsa-mir-191 | MED17        | 0.315050383 mirna_pc |
| 27720 hsa-mir-191 | PRR13        | 0.367282896 mirna_pc |
| 27721 hsa-mir-191 | VPS54        | 0.35751021 mirna_pc  |
| 27722 hsa-mir-191 | SMAD6        | 0.368482768 mirna_pc |
| 27723 hsa-mir-191 | ID2          | 0.444323003 mirna_pc |
| 27724 hsa-mir-191 | ZNF738       | 0.321910061 mirna_pc |
| 27725 hsa-mir-191 | C3orf75      | 0.49505162 mirna_pc  |
| 27726 hsa-mir-191 | ZSCAN12P1    | 0.362799857 mirna_pc |
| 27727 hsa-mir-191 | SLC35D2      | 0.429398778 mirna_pc |
| 27728 hsa-mir-191 | CANT1        | 0.344125048 mirna_pc |
| 27729 hsa-mir-191 | CLCN5        | 0.396383201 mirna_pc |
| 27730 hsa-mir-191 | XYLB         | 0.559447741 mirna_pc |
| 27731 hsa-mir-191 | MTG1         | 0.37530256 mirna_pc  |
| 27732 hsa-mir-191 | PPOX         | 0.30131228 mirna_pc  |
| 27733 hsa-mir-191 | MED12        | 0.3280811 mirna_pc   |
| 27734 hsa-mir-191 | TOE1         | 0.390877955 mirna_pc |
| 27735 hsa-mir-191 | HSD17B14     | 0.347596477 mirna_pc |
| 27736 hsa-mir-191 | SCCPDH       | 0.351245524 mirna_pc |
| 27737 hsa-mir-191 | ANUBL1       | 0.324360835 mirna_pc |
| 27738 hsa-mir-191 | B3GNT3       | 0.335770549 mirna_pc |
| 27739 hsa-mir-191 | NCOA5        | 0.317350725 mirna_pc |
| 27740 hsa-mir-191 | DFFB         | 0.351068274 mirna_pc |
| 27741 hsa-mir-191 | DID01        | 0.30337537 mirna_pc  |
| 27742 hsa-mir-191 | TSGA10       | 0.330839811 mirna_pc |
| 27743 hsa-mir-191 | SPR          | 0.366253515 mirna_pc |
| 27744 hsa-mir-191 | CIAO1        | 0.421127081 mirna_pc |
| 27745 hsa-mir-191 | PLGLB2       | 0.352171507 mirna_pc |
| 27746 hsa-mir-191 | ULK4         | 0.315462422 mirna_pc |
| 27747 hsa-mir-191 | ERBB3        | 0.563985941 mirna_pc |
| 27748 hsa-mir-191 | ST6GAL1      | 0.377516966 mirna_pc |
| 27749 hsa-mir-191 | TUT1         | 0.356642557 mirna_pc |
| 27750 hsa-mir-191 | PLIN2        | 0.410414273 mirna_pc |
| 27751 hsa-mir-191 | JAGN1        | 0.323028441 mirna_pc |
| 27752 hsa-mir-191 | LOC100130581 | 0.328646521 mirna_pc |
| 27753 hsa-mir-191 | TNS3         | 0.416666465 mirna_pc |
| 27754 hsa-mir-191 | LASS2        | 0.413388639 mirna_pc |
| 27755 hsa-mir-191 | SEMA4G       | 0.540457229 mirna_pc |

|                   |            |                      |
|-------------------|------------|----------------------|
| 27756 hsa-mir-191 | HMG20A     | 0.320779445 mirna_pc |
| 27757 hsa-mir-191 | FAM119A    | 0.322294363 mirna_pc |
| 27758 hsa-mir-191 | SYS1       | 0.387207094 mirna_pc |
| 27759 hsa-mir-191 | TRIM27     | 0.349986924 mirna_pc |
| 27760 hsa-mir-191 | CCNI2      | 0.515545664 mirna_pc |
| 27761 hsa-mir-191 | PDZD8      | 0.341491222 mirna_pc |
| 27762 hsa-mir-191 | SLC30A1    | 0.332121924 mirna_pc |
| 27763 hsa-mir-191 | IQCE       | 0.386291418 mirna_pc |
| 27764 hsa-mir-191 | ALDH18A1   | 0.396493898 mirna_pc |
| 27765 hsa-mir-191 | CRYZ       | 0.394318775 mirna_pc |
| 27766 hsa-mir-191 | NCKIPSD    | 0.400936848 mirna_pc |
| 27767 hsa-mir-191 | CTBP2      | 0.346224599 mirna_pc |
| 27768 hsa-mir-191 | HNF4A      | 0.409673869 mirna_pc |
| 27769 hsa-mir-191 | ZNF664     | 0.531240321 mirna_pc |
| 27770 hsa-mir-191 | SLC39A7    | 0.435029554 mirna_pc |
| 27771 hsa-mir-191 | PECR       | 0.415913645 mirna_pc |
| 27772 hsa-mir-191 | TMEM2      | 0.300773011 mirna_pc |
| 27773 hsa-mir-191 | ZNF774     | 0.414581504 mirna_pc |
| 27774 hsa-mir-191 | GLB1L2     | 0.343848721 mirna_pc |
| 27775 hsa-mir-191 | PTP4A2     | 0.310081324 mirna_pc |
| 27776 hsa-mir-191 | C6orf136   | 0.3787069 mirna_pc   |
| 27777 hsa-mir-191 | CD97       | 0.326618943 mirna_pc |
| 27778 hsa-mir-191 | GOLT1A     | 0.471765837 mirna_pc |
| 27779 hsa-mir-191 | GCN1L1     | 0.315354094 mirna_pc |
| 27780 hsa-mir-191 | MST1       | 0.400295799 mirna_pc |
| 27781 hsa-mir-191 | CAPN10     | 0.356812979 mirna_pc |
| 27782 hsa-mir-191 | PSEN2      | 0.339241526 mirna_pc |
| 27783 hsa-mir-191 | THEM4      | 0.35415297 mirna_pc  |
| 27784 hsa-mir-191 | ADAP1      | 0.366005031 mirna_pc |
| 27785 hsa-mir-191 | CSPP1      | 0.346669681 mirna_pc |
| 27786 hsa-mir-191 | C20orf96   | 0.492198795 mirna_pc |
| 27787 hsa-mir-191 | CBARA1     | 0.340299193 mirna_pc |
| 27788 hsa-mir-191 | NCRNA00095 | 0.357928275 mirna_pc |
| 27789 hsa-mir-191 | C1orf210   | 0.370560912 mirna_pc |
| 27790 hsa-mir-191 | PAPSS2     | 0.401546117 mirna_pc |
| 27791 hsa-mir-191 | OSBPL10    | 0.32283808 mirna_pc  |
| 27792 hsa-mir-191 | PPP4R2     | 0.554333238 mirna_pc |
| 27793 hsa-mir-191 | VSIG10     | 0.407725665 mirna_pc |
| 27794 hsa-mir-191 | STAMBPL1   | 0.331565235 mirna_pc |
| 27795 hsa-mir-191 | C20orf112  | 0.346150378 mirna_pc |
| 27796 hsa-mir-191 | IP6K2      | 0.308663149 mirna_pc |
| 27797 hsa-mir-191 | KCNK5      | 0.304970196 mirna_pc |
| 27798 hsa-mir-191 | SHQ1       | 0.42792079 mirna_pc  |
| 27799 hsa-mir-191 | ASXL1      | 0.358659746 mirna_pc |
| 27800 hsa-mir-191 | TMEM51     | 0.402990037 mirna_pc |
| 27801 hsa-mir-191 | SLC37A1    | 0.342309978 mirna_pc |
| 27802 hsa-mir-191 | SLC26A6    | 0.371067698 mirna_pc |
| 27803 hsa-mir-191 | HNF4G      | 0.364893661 mirna_pc |
| 27804 hsa-mir-191 | CALM3      | 0.429583423 mirna_pc |
| 27805 hsa-mir-191 | LOC81691   | 0.366402724 mirna_pc |
| 27806 hsa-mir-191 | ZCCHC3     | 0.422913142 mirna_pc |
| 27807 hsa-mir-191 | WDR73      | 0.412637448 mirna_pc |
| 27808 hsa-mir-191 | UBA3       | 0.35532691 mirna_pc  |
| 27809 hsa-mir-191 | LYPD6      | 0.36332147 mirna_pc  |

|                   |           |                      |
|-------------------|-----------|----------------------|
| 27810 hsa-mir-191 | GLB1      | 0.487262184 mirna_pc |
| 27811 hsa-mir-191 | LOC440944 | 0.338567405 mirna_pc |
| 27812 hsa-mir-191 | COX7A2L   | 0.307455954 mirna_pc |
| 27813 hsa-mir-191 | PROX1     | 0.46370661 mirna_pc  |
| 27814 hsa-mir-191 | PCYT2     | 0.43006474 mirna_pc  |
| 27815 hsa-mir-191 | DNAJC22   | 0.393033085 mirna_pc |
| 27816 hsa-mir-191 | EPHA10    | 0.370230314 mirna_pc |
| 27817 hsa-mir-191 | LY6G5B    | 0.306795947 mirna_pc |
| 27818 hsa-mir-191 | STX3      | 0.441787405 mirna_pc |
| 27819 hsa-mir-191 | ACPI      | 0.325769344 mirna_pc |
| 27820 hsa-mir-191 | C2orf43   | 0.346466601 mirna_pc |
| 27821 hsa-mir-191 | MARVELD2  | 0.327638084 mirna_pc |
| 27822 hsa-mir-191 | RNF5P1    | 0.444368872 mirna_pc |
| 27823 hsa-mir-191 | ZNF48     | 0.307262072 mirna_pc |
| 27824 hsa-mir-191 | CCDC72    | 0.343950396 mirna_pc |
| 27825 hsa-mir-191 | ALG1      | 0.309865626 mirna_pc |
| 27826 hsa-mir-191 | IL17RB    | 0.526922232 mirna_pc |
| 27827 hsa-mir-191 | ZNF341    | 0.337531278 mirna_pc |
| 27828 hsa-mir-191 | PKDCC     | 0.341133627 mirna_pc |
| 27829 hsa-mir-191 | FRAS1     | 0.350802067 mirna_pc |
| 27830 hsa-mir-191 | SEC23B    | 0.372161748 mirna_pc |
| 27831 hsa-mir-191 | GPKOW     | 0.327270186 mirna_pc |
| 27832 hsa-mir-191 | BAT4      | 0.311899834 mirna_pc |
| 27833 hsa-mir-191 | DDB1      | 0.333397755 mirna_pc |
| 27834 hsa-mir-191 | CD320     | 0.370744416 mirna_pc |
| 27835 hsa-mir-191 | TXLNG     | 0.375035305 mirna_pc |
| 27836 hsa-mir-191 | LOC80054  | 0.45154721 mirna_pc  |
| 27837 hsa-mir-191 | C2orf34   | 0.332001905 mirna_pc |
| 27838 hsa-mir-191 | PVRL2     | 0.389812965 mirna_pc |
| 27839 hsa-mir-191 | EXOC6     | 0.423662635 mirna_pc |
| 27840 hsa-mir-191 | QPRT      | 0.3911707 mirna_pc   |
| 27841 hsa-mir-191 | PREB      | 0.320058119 mirna_pc |
| 27842 hsa-mir-191 | ZNF443    | 0.401349893 mirna_pc |
| 27843 hsa-mir-191 | ZDHH23    | 0.304100743 mirna_pc |
| 27844 hsa-mir-191 | PRMT6     | 0.429130603 mirna_pc |
| 27845 hsa-mir-191 | MAST3     | 0.310781032 mirna_pc |
| 27846 hsa-mir-191 | LLGL2     | 0.401985266 mirna_pc |
| 27847 hsa-mir-191 | CACNA1D   | 0.459373579 mirna_pc |
| 27848 hsa-mir-191 | NEU1      | 0.380474589 mirna_pc |
| 27849 hsa-mir-191 | TMED2     | 0.343148375 mirna_pc |
| 27850 hsa-mir-191 | COG2      | 0.311482754 mirna_pc |
| 27851 hsa-mir-191 | PPM1H     | 0.357834563 mirna_pc |
| 27852 hsa-mir-191 | SLC11A2   | 0.399168253 mirna_pc |
| 27853 hsa-mir-191 | SSR2      | 0.321303688 mirna_pc |
| 27854 hsa-mir-191 | HDAC6     | 0.402915874 mirna_pc |
| 27855 hsa-mir-191 | PNKD      | 0.597014897 mirna_pc |
| 27856 hsa-mir-191 | ZNF530    | 0.319580808 mirna_pc |
| 27857 hsa-mir-191 | DMXL2     | 0.350784825 mirna_pc |
| 27858 hsa-mir-191 | ZNF765    | 0.408336141 mirna_pc |
| 27859 hsa-mir-191 | TMEM97    | 0.375369261 mirna_pc |
| 27860 hsa-mir-191 | BMF       | 0.343341235 mirna_pc |
| 27861 hsa-mir-191 | VAPB      | 0.300530792 mirna_pc |
| 27862 hsa-mir-191 | MUC13     | 0.317504338 mirna_pc |
| 27863 hsa-mir-191 | PLCH1     | 0.390140203 mirna_pc |



|                   |           |                      |
|-------------------|-----------|----------------------|
| 27864 hsa-mir-191 | METTL6    | 0.312464458 mirna_pc |
| 27865 hsa-mir-191 | OGG1      | 0.332124866 mirna_pc |
| 27866 hsa-mir-191 | MIR17HG   | 0.31207277 mirna_pc  |
| 27867 hsa-mir-191 | BAT3      | 0.342470123 mirna_pc |
| 27868 hsa-mir-191 | SMPDL3B   | 0.375739857 mirna_pc |
| 27869 hsa-mir-191 | C20orf30  | 0.367337528 mirna_pc |
| 27870 hsa-mir-191 | SLC29A3   | 0.375193741 mirna_pc |
| 27871 hsa-mir-191 | ZNF600    | 0.327494909 mirna_pc |
| 27872 hsa-mir-191 | AGT       | 0.360441317 mirna_pc |
| 27873 hsa-mir-191 | PRDX4     | 0.352433064 mirna_pc |
| 27874 hsa-mir-191 | GCHFR     | 0.359575751 mirna_pc |
| 27875 hsa-mir-191 | DDRCK1    | 0.310994695 mirna_pc |
| 27876 hsa-mir-191 | PARD6B    | 0.307615653 mirna_pc |
| 27877 hsa-mir-191 | PRDX3     | 0.46935106 mirna_pc  |
| 27878 hsa-mir-191 | ZNF799    | 0.399466767 mirna_pc |
| 27879 hsa-mir-191 | ZNF239    | 0.524863518 mirna_pc |
| 27880 hsa-mir-191 | KLHL23    | 0.323826684 mirna_pc |
| 27881 hsa-mir-191 | TMEM14B   | 0.389380668 mirna_pc |
| 27882 hsa-mir-191 | C9orf64   | 0.304861014 mirna_pc |
| 27883 hsa-mir-191 | C17orf76  | 0.345263837 mirna_pc |
| 27884 hsa-mir-191 | GSTO2     | 0.365847612 mirna_pc |
| 27885 hsa-mir-191 | SRCIN1    | 0.476242943 mirna_pc |
| 27886 hsa-mir-191 | RBBP7     | 0.300865255 mirna_pc |
| 27887 hsa-mir-191 | ACSL5     | 0.362178635 mirna_pc |
| 27888 hsa-mir-191 | ZNF77     | 0.403530272 mirna_pc |
| 27889 hsa-mir-191 | PCBD1     | 0.43671486 mirna_pc  |
| 27890 hsa-mir-191 | ZNF468    | 0.537475981 mirna_pc |
| 27891 hsa-mir-191 | LOC151009 | 0.372538057 mirna_pc |
| 27892 hsa-mir-191 | TSTA3     | 0.339320127 mirna_pc |
| 27893 hsa-mir-191 | SLC37A4   | 0.470408941 mirna_pc |
| 27894 hsa-mir-191 | EIF2S3    | 0.443190808 mirna_pc |
| 27895 hsa-mir-191 | TTC13     | 0.322921816 mirna_pc |
| 27896 hsa-mir-191 | MON1A     | 0.369102904 mirna_pc |
| 27897 hsa-mir-191 | CENPV     | 0.528967427 mirna_pc |
| 27898 hsa-mir-191 | SFRS6     | 0.331856341 mirna_pc |
| 27899 hsa-mir-191 | PPCDC     | 0.307368798 mirna_pc |
| 27900 hsa-mir-191 | TMEM63A   | 0.429831989 mirna_pc |
| 27901 hsa-mir-191 | ZNF592    | 0.31946443 mirna_pc  |
| 27902 hsa-mir-191 | DNAJC11   | 0.336226486 mirna_pc |
| 27903 hsa-mir-191 | BCL2L14   | 0.320664234 mirna_pc |
| 27904 hsa-mir-191 | KIAA1107  | 0.339347915 mirna_pc |
| 27905 hsa-mir-191 | WDSUB1    | 0.378931155 mirna_pc |
| 27906 hsa-mir-191 | MYO6      | 0.332966796 mirna_pc |
| 27907 hsa-mir-191 | RPSAP9    | 0.363125978 mirna_pc |
| 27908 hsa-mir-191 | ACCN2     | 0.309594561 mirna_pc |
| 27909 hsa-mir-191 | NLK       | 0.341582872 mirna_pc |
| 27910 hsa-mir-191 | GPR35     | 0.399033021 mirna_pc |
| 27911 hsa-mir-191 | VAR52     | 0.319525214 mirna_pc |
| 27912 hsa-mir-191 | TMC4      | 0.319045228 mirna_pc |
| 27913 hsa-mir-191 | PATZ1     | 0.355073978 mirna_pc |
| 27914 hsa-mir-191 | ZNF670    | 0.364332275 mirna_pc |
| 27915 hsa-mir-191 | CGN       | 0.442597014 mirna_pc |
| 27916 hsa-mir-191 | PARK7     | 0.306744994 mirna_pc |
| 27917 hsa-mir-191 | C3orf33   | 0.314322879 mirna_pc |

|                   |          |                      |
|-------------------|----------|----------------------|
| 27918 hsa-mir-191 | ZNF28    | 0.488410241 mirna_pc |
| 27919 hsa-mir-191 | PARS2    | 0.302116788 mirna_pc |
| 27920 hsa-mir-191 | COQ5     | 0.300456646 mirna_pc |
| 27921 hsa-mir-191 | PIGM     | 0.483569201 mirna_pc |
| 27922 hsa-mir-191 | PRELID2  | 0.321775019 mirna_pc |
| 27923 hsa-mir-191 | SLC2A8   | 0.344981684 mirna_pc |
| 27924 hsa-mir-191 | DOM3Z    | 0.445038082 mirna_pc |
| 27925 hsa-mir-191 | ARSE     | 0.482730406 mirna_pc |
| 27926 hsa-mir-191 | SS18L1   | 0.382730564 mirna_pc |
| 27927 hsa-mir-191 | ZNF768   | 0.302667496 mirna_pc |
| 27928 hsa-mir-330 | ANP32E   | 0.331323908 mirna_pc |
| 27929 hsa-mir-330 | TPM3     | 0.414662931 mirna_pc |
| 27930 hsa-mir-330 | BCL2L12  | 0.363206472 mirna_pc |
| 27931 hsa-mir-330 | PSMC4    | 0.392727015 mirna_pc |
| 27932 hsa-mir-330 | HOXC10   | 0.364145192 mirna_pc |
| 27933 hsa-mir-330 | CPSF3    | 0.313275394 mirna_pc |
| 27934 hsa-mir-330 | TLCD1    | 0.300260537 mirna_pc |
| 27935 hsa-mir-330 | MTHFR    | 0.324791795 mirna_pc |
| 27936 hsa-mir-330 | SNRPA1   | 0.378510592 mirna_pc |
| 27937 hsa-mir-330 | HSPBP1   | 0.334769346 mirna_pc |
| 27938 hsa-mir-330 | LYAR     | 0.370503783 mirna_pc |
| 27939 hsa-mir-330 | GNL2     | 0.317371486 mirna_pc |
| 27940 hsa-mir-330 | PTMA     | 0.306501065 mirna_pc |
| 27941 hsa-mir-330 | DPY30    | 0.30259759 mirna_pc  |
| 27942 hsa-mir-330 | TARDBP   | 0.352428053 mirna_pc |
| 27943 hsa-mir-330 | SP140L   | 0.311659002 mirna_pc |
| 27944 hsa-mir-330 | EPCAM    | 0.301603517 mirna_pc |
| 27945 hsa-mir-330 | MIIP     | 0.419286056 mirna_pc |
| 27946 hsa-mir-330 | SLC39A4  | 0.351957633 mirna_pc |
| 27947 hsa-mir-330 | GLO1     | 0.305128017 mirna_pc |
| 27948 hsa-mir-330 | DDX55    | 0.324321175 mirna_pc |
| 27949 hsa-mir-330 | HPDL     | 0.3495942 mirna_pc   |
| 27950 hsa-mir-330 | S100A6   | 0.312639123 mirna_pc |
| 27951 hsa-mir-330 | GEMIN6   | 0.317088381 mirna_pc |
| 27952 hsa-mir-330 | IRF3     | 0.315069844 mirna_pc |
| 27953 hsa-mir-330 | FARSB    | 0.322091016 mirna_pc |
| 27954 hsa-mir-330 | TRIM15   | 0.322261653 mirna_pc |
| 27955 hsa-mir-330 | MFN2     | 0.309583516 mirna_pc |
| 27956 hsa-mir-330 | ATAD3B   | 0.354295472 mirna_pc |
| 27957 hsa-mir-330 | RPF2     | 0.318108327 mirna_pc |
| 27958 hsa-mir-330 | NFKB1B   | 0.394460715 mirna_pc |
| 27959 hsa-mir-330 | PUSL1    | 0.397424121 mirna_pc |
| 27960 hsa-mir-330 | FAM136A  | 0.307475277 mirna_pc |
| 27961 hsa-mir-330 | BAIAP2L2 | 0.306064594 mirna_pc |
| 27962 hsa-mir-330 | TTC32    | 0.318690169 mirna_pc |
| 27963 hsa-mir-330 | U2AF1    | 0.326965136 mirna_pc |
| 27964 hsa-mir-330 | RAG1AP1  | 0.314827457 mirna_pc |
| 27965 hsa-mir-330 | TMC01    | 0.316267379 mirna_pc |
| 27966 hsa-mir-330 | GPATCH4  | 0.310449667 mirna_pc |
| 27967 hsa-mir-330 | SH3BGRL3 | 0.305683139 mirna_pc |
| 27968 hsa-mir-330 | KRT18    | 0.301665822 mirna_pc |
| 27969 hsa-mir-330 | ZNRD1    | 0.320199642 mirna_pc |
| 27970 hsa-mir-330 | FBX06    | 0.445251596 mirna_pc |
| 27971 hsa-mir-330 | EXOSC10  | 0.418286248 mirna_pc |

|                   |          |                      |
|-------------------|----------|----------------------|
| 27972 hsa-mir-330 | UPF3B    | 0.352683611 mirna_pc |
| 27973 hsa-mir-330 | DECR1    | 0.320494235 mirna_pc |
| 27974 hsa-mir-330 | ZNF165   | 0.410590469 mirna_pc |
| 27975 hsa-mir-330 | AP1TD1   | 0.392109104 mirna_pc |
| 27976 hsa-mir-330 | RNF34    | 0.339645644 mirna_pc |
| 27977 hsa-mir-330 | GLMN     | 0.330860302 mirna_pc |
| 27978 hsa-mir-330 | ZNF593   | 0.318969282 mirna_pc |
| 27979 hsa-mir-330 | REEP6    | 0.325617551 mirna_pc |
| 27980 hsa-mir-330 | GEMIN7   | 0.333887661 mirna_pc |
| 27981 hsa-mir-330 | NAPRT1   | 0.406100758 mirna_pc |
| 27982 hsa-mir-330 | HIST1H1C | 0.310661481 mirna_pc |
| 27983 hsa-mir-330 | UBE2CBP  | 0.319021378 mirna_pc |
| 27984 hsa-mir-330 | MTMR11   | 0.329643864 mirna_pc |
| 27985 hsa-mir-330 | CNO      | 0.332750988 mirna_pc |
| 27986 hsa-mir-330 | C7orf36  | 0.376206407 mirna_pc |
| 27987 hsa-mir-330 | KIAA2013 | 0.367407954 mirna_pc |
| 27988 hsa-mir-330 | SARS2    | 0.313707236 mirna_pc |
| 27989 hsa-mir-330 | DGAT1    | 0.337573316 mirna_pc |
| 27990 hsa-mir-330 | RER1     | 0.375217154 mirna_pc |
| 27991 hsa-mir-330 | SSU72    | 0.333941244 mirna_pc |
| 27992 hsa-mir-330 | PQLC2    | 0.303027411 mirna_pc |
| 27993 hsa-mir-330 | C6orf211 | 0.329009192 mirna_pc |
| 27994 hsa-mir-330 | C17orf58 | 0.332339453 mirna_pc |
| 27995 hsa-mir-330 | BSG      | 0.343358865 mirna_pc |
| 27996 hsa-mir-330 | STX18    | 0.331281281 mirna_pc |
| 27997 hsa-mir-330 | ZUFSP    | 0.309228704 mirna_pc |
| 27998 hsa-mir-330 | SPDYA    | 0.328183785 mirna_pc |
| 27999 hsa-mir-330 | RBM25    | 0.3635043 mirna_pc   |
| 28000 hsa-mir-330 | RTCD1    | 0.328252909 mirna_pc |
| 28001 hsa-mir-330 | LGALS4   | 0.318927713 mirna_pc |
| 28002 hsa-mir-330 | C1orf93  | 0.311043521 mirna_pc |
| 28003 hsa-mir-330 | SNRNP35  | 0.324624882 mirna_pc |
| 28004 hsa-mir-330 | MTERF    | 0.314616393 mirna_pc |
| 28005 hsa-mir-330 | SDF4     | 0.306507923 mirna_pc |
| 28006 hsa-mir-330 | RAB13    | 0.30090261 mirna_pc  |
| 28007 hsa-mir-330 | SLC25A33 | 0.379353959 mirna_pc |
| 28008 hsa-mir-330 | UBIAD1   | 0.369154067 mirna_pc |
| 28009 hsa-mir-330 | PEX14    | 0.399632529 mirna_pc |
| 28010 hsa-mir-330 | KRT8     | 0.305624764 mirna_pc |
| 28011 hsa-mir-330 | GTF2H2   | 0.301340384 mirna_pc |
| 28012 hsa-mir-330 | CPSF3L   | 0.304630351 mirna_pc |
| 28013 hsa-mir-330 | CLCN5    | 0.314898617 mirna_pc |
| 28014 hsa-mir-330 | C2orf3   | 0.300401428 mirna_pc |
| 28015 hsa-mir-330 | CDK11B   | 0.369577675 mirna_pc |
| 28016 hsa-mir-330 | CDK11A   | 0.402515669 mirna_pc |
| 28017 hsa-mir-330 | ZNF787   | 0.340059974 mirna_pc |
| 28018 hsa-mir-330 | ZNF513   | 0.386622817 mirna_pc |
| 28019 hsa-mir-330 | ZCCHC9   | 0.315350919 mirna_pc |
| 28020 hsa-mir-330 | DDX1     | 0.330362113 mirna_pc |
| 28021 hsa-mir-330 | ACP1     | 0.350392443 mirna_pc |
| 28022 hsa-mir-330 | C2orf34  | 0.363262184 mirna_pc |
| 28023 hsa-mir-330 | TNFRSF1B | 0.312152957 mirna_pc |
| 28024 hsa-mir-330 | CXorf26  | 0.305039547 mirna_pc |
| 28025 hsa-mir-330 | ZNF468   | 0.350739534 mirna_pc |

|                   |           |                      |
|-------------------|-----------|----------------------|
| 28026 hsa-mir-330 | TSTA3     | 0.386741107 mirna_pc |
| 28027 hsa-mir-330 | AURKAIP1  | 0.327488892 mirna_pc |
| 28028 hsa-mir-330 | GTF2B     | 0.350161555 mirna_pc |
| 28029 hsa-mir-330 | GTF3C6    | 0.312819659 mirna_pc |
| 28030 hsa-mir-424 | TPX2      | 0.304467532 mirna_pc |
| 28031 hsa-mir-424 | RCC2      | 0.325495761 mirna_pc |
| 28032 hsa-mir-424 | UBE2C     | 0.365750197 mirna_pc |
| 28033 hsa-mir-424 | KIF2C     | 0.307662262 mirna_pc |
| 28034 hsa-mir-424 | CDC20     | 0.329450567 mirna_pc |
| 28035 hsa-mir-424 | CCNA2     | 0.337937124 mirna_pc |
| 28036 hsa-mir-424 | MND1      | 0.375385491 mirna_pc |
| 28037 hsa-mir-424 | RAD54L    | 0.321373853 mirna_pc |
| 28038 hsa-mir-424 | CENPA     | 0.332784928 mirna_pc |
| 28039 hsa-mir-424 | MAD2L1    | 0.351199941 mirna_pc |
| 28040 hsa-mir-424 | TIMELESS  | 0.316290081 mirna_pc |
| 28041 hsa-mir-424 | CCNB1     | 0.325125071 mirna_pc |
| 28042 hsa-mir-424 | STMN1     | 0.343137048 mirna_pc |
| 28043 hsa-mir-424 | CKS2      | 0.300589206 mirna_pc |
| 28044 hsa-mir-424 | CKS1B     | 0.407867927 mirna_pc |
| 28045 hsa-mir-424 | TUBB      | 0.316266044 mirna_pc |
| 28046 hsa-mir-424 | RAD51     | 0.333565119 mirna_pc |
| 28047 hsa-mir-424 | BIRC5     | 0.313826519 mirna_pc |
| 28048 hsa-mir-424 | EME1      | 0.32733604 mirna_pc  |
| 28049 hsa-mir-424 | AURKB     | 0.356349211 mirna_pc |
| 28050 hsa-mir-424 | CHEK2     | 0.306677585 mirna_pc |
| 28051 hsa-mir-424 | C1orf112  | 0.344998744 mirna_pc |
| 28052 hsa-mir-424 | ORC6L     | 0.372287554 mirna_pc |
| 28053 hsa-mir-424 | C16orf59  | 0.360685644 mirna_pc |
| 28054 hsa-mir-424 | TTK       | 0.310008512 mirna_pc |
| 28055 hsa-mir-424 | PSMA4     | 0.32940518 mirna_pc  |
| 28056 hsa-mir-424 | CCT5      | 0.401025128 mirna_pc |
| 28057 hsa-mir-424 | HNRNPC    | 0.335863975 mirna_pc |
| 28058 hsa-mir-424 | ILF2      | 0.351114266 mirna_pc |
| 28059 hsa-mir-424 | HNRNPA2B1 | 0.327901895 mirna_pc |
| 28060 hsa-mir-424 | RAN       | 0.317126976 mirna_pc |
| 28061 hsa-mir-424 | TYMS      | 0.31204159 mirna_pc  |
| 28062 hsa-mir-424 | RNASEH2A  | 0.342867073 mirna_pc |
| 28063 hsa-mir-424 | EPR1      | 0.30386493 mirna_pc  |
| 28064 hsa-mir-424 | H2AFX     | 0.300101947 mirna_pc |
| 28065 hsa-mir-424 | CENPN     | 0.312022461 mirna_pc |
| 28066 hsa-mir-424 | RANBP1    | 0.324470799 mirna_pc |
| 28067 hsa-mir-424 | FUS       | 0.379144931 mirna_pc |
| 28068 hsa-mir-424 | CENPO     | 0.316032807 mirna_pc |
| 28069 hsa-mir-424 | SERPINH1  | 0.373079445 mirna_pc |
| 28070 hsa-mir-424 | NUDT1     | 0.393163847 mirna_pc |
| 28071 hsa-mir-424 | CDKN1C    | 0.305206068 mirna_pc |
| 28072 hsa-mir-424 | GINS2     | 0.327075802 mirna_pc |
| 28073 hsa-mir-424 | C7orf11   | 0.376705519 mirna_pc |
| 28074 hsa-mir-424 | CENPH     | 0.331508625 mirna_pc |
| 28075 hsa-mir-424 | TCOF1     | 0.321911245 mirna_pc |
| 28076 hsa-mir-424 | SNRPC     | 0.306729123 mirna_pc |
| 28077 hsa-mir-424 | RFC4      | 0.394388048 mirna_pc |
| 28078 hsa-mir-424 | WDR75     | 0.366855247 mirna_pc |
| 28079 hsa-mir-424 | BRIX1     | 0.371765633 mirna_pc |

|                   |          |                      |
|-------------------|----------|----------------------|
| 28080 hsa-mir-424 | CDC25A   | 0.319138567 mirna_pc |
| 28081 hsa-mir-424 | H2AFZ    | 0.304832915 mirna_pc |
| 28082 hsa-mir-424 | BANF1    | 0.32017549 mirna_pc  |
| 28083 hsa-mir-424 | C21orf45 | 0.311410343 mirna_pc |
| 28084 hsa-mir-424 | DNAJB11  | 0.306099332 mirna_pc |
| 28085 hsa-mir-424 | NUTF2    | 0.379802761 mirna_pc |
| 28086 hsa-mir-424 | DAZAP1   | 0.337828372 mirna_pc |
| 28087 hsa-mir-424 | MRPL9    | 0.365170617 mirna_pc |
| 28088 hsa-mir-424 | PFDN4    | 0.351732558 mirna_pc |
| 28089 hsa-mir-424 | PSRC1    | 0.30365609 mirna_pc  |
| 28090 hsa-mir-424 | MRPL47   | 0.356109654 mirna_pc |
| 28091 hsa-mir-424 | STIP1    | 0.333777395 mirna_pc |
| 28092 hsa-mir-424 | PSMG3    | 0.30377032 mirna_pc  |
| 28093 hsa-mir-424 | HNRNPM   | 0.324438986 mirna_pc |
| 28094 hsa-mir-424 | C3orf26  | 0.341882982 mirna_pc |
| 28095 hsa-mir-424 | MRT04    | 0.369231631 mirna_pc |
| 28096 hsa-mir-424 | PPIH     | 0.350329753 mirna_pc |
| 28097 hsa-mir-424 | CCDC58   | 0.328728676 mirna_pc |
| 28098 hsa-mir-424 | SKP2     | 0.301128835 mirna_pc |
| 28099 hsa-mir-424 | POLD2    | 0.318622937 mirna_pc |
| 28100 hsa-mir-424 | LYAR     | 0.316436251 mirna_pc |
| 28101 hsa-mir-424 | ECE2     | 0.313176604 mirna_pc |
| 28102 hsa-mir-424 | GPN1     | 0.331834222 mirna_pc |
| 28103 hsa-mir-424 | SSRP1    | 0.3630648 mirna_pc   |
| 28104 hsa-mir-424 | PA2G4    | 0.364636306 mirna_pc |
| 28105 hsa-mir-424 | HOXA1    | 0.321854813 mirna_pc |
| 28106 hsa-mir-424 | MTL 5.00 | 0.330266416 mirna_pc |
| 28107 hsa-mir-424 | FSCN1    | 0.300646438 mirna_pc |
| 28108 hsa-mir-424 | PHF5A    | 0.319884499 mirna_pc |
| 28109 hsa-mir-424 | SNRNP40  | 0.305768703 mirna_pc |
| 28110 hsa-mir-424 | NOC2L    | 0.306717778 mirna_pc |
| 28111 hsa-mir-424 | NASP     | 0.311150037 mirna_pc |
| 28112 hsa-mir-424 | CCDC86   | 0.37636139 mirna_pc  |
| 28113 hsa-mir-424 | C11orf84 | 0.398531867 mirna_pc |
| 28114 hsa-mir-424 | TBCE     | 0.315240917 mirna_pc |
| 28115 hsa-mir-424 | NCBP2    | 0.302698701 mirna_pc |
| 28116 hsa-mir-424 | SLC3A2   | 0.327597279 mirna_pc |
| 28117 hsa-mir-424 | DPY30    | 0.379280858 mirna_pc |
| 28118 hsa-mir-424 | LSM 5.00 | 0.306673827 mirna_pc |
| 28119 hsa-mir-424 | MEN1     | 0.3109981 mirna_pc   |
| 28120 hsa-mir-424 | CCT4     | 0.39680652 mirna_pc  |
| 28121 hsa-mir-424 | SAC3D1   | 0.305198469 mirna_pc |
| 28122 hsa-mir-424 | NAE1     | 0.325106606 mirna_pc |
| 28123 hsa-mir-424 | E2F4     | 0.320261655 mirna_pc |
| 28124 hsa-mir-424 | TRMT112  | 0.323803439 mirna_pc |
| 28125 hsa-mir-424 | PSMD2    | 0.300952549 mirna_pc |
| 28126 hsa-mir-424 | PMAIP1   | 0.342851984 mirna_pc |
| 28127 hsa-mir-424 | YWHAE    | 0.388003768 mirna_pc |
| 28128 hsa-mir-424 | C1QTNF6  | 0.304804471 mirna_pc |
| 28129 hsa-mir-424 | PSMD10   | 0.346594225 mirna_pc |
| 28130 hsa-mir-424 | LSM 6.00 | 0.382112194 mirna_pc |
| 28131 hsa-mir-424 | WDR74    | 0.344779337 mirna_pc |
| 28132 hsa-mir-424 | POLR2G   | 0.332810851 mirna_pc |
| 28133 hsa-mir-424 | MFAP2    | 0.33946653 mirna_pc  |

|                   |           |                      |
|-------------------|-----------|----------------------|
| 28134 hsa-mir-424 | TRA2B     | 0.3423457 mirna_pc   |
| 28135 hsa-mir-424 | C15orf23  | 0.364733033 mirna_pc |
| 28136 hsa-mir-424 | C3orf21   | 0.37130674 mirna_pc  |
| 28137 hsa-mir-424 | DIABLO    | 0.306914995 mirna_pc |
| 28138 hsa-mir-424 | IGF2BP2   | 0.33027108 mirna_pc  |
| 28139 hsa-mir-424 | EIF2S2    | 0.373416463 mirna_pc |
| 28140 hsa-mir-424 | C16orf80  | 0.324581056 mirna_pc |
| 28141 hsa-mir-424 | GMNN      | 0.33048362 mirna_pc  |
| 28142 hsa-mir-424 | PA2G4P4   | 0.326054769 mirna_pc |
| 28143 hsa-mir-424 | MRPL11    | 0.334194396 mirna_pc |
| 28144 hsa-mir-424 | CRIPT     | 0.356378394 mirna_pc |
| 28145 hsa-mir-424 | HOXD11    | 0.325466574 mirna_pc |
| 28146 hsa-mir-424 | MED19     | 0.349415605 mirna_pc |
| 28147 hsa-mir-424 | PSMA2     | 0.357576842 mirna_pc |
| 28148 hsa-mir-424 | TAF5      | 0.368083753 mirna_pc |
| 28149 hsa-mir-424 | KARS      | 0.317357141 mirna_pc |
| 28150 hsa-mir-424 | FAM58A    | 0.374020217 mirna_pc |
| 28151 hsa-mir-424 | MAD2L2    | 0.393816174 mirna_pc |
| 28152 hsa-mir-424 | FJX1      | 0.304081804 mirna_pc |
| 28153 hsa-mir-424 | DUSP12    | 0.325340384 mirna_pc |
| 28154 hsa-mir-424 | C16orf87  | 0.320213382 mirna_pc |
| 28155 hsa-mir-424 | NOL10     | 0.317010275 mirna_pc |
| 28156 hsa-mir-424 | TRIAP1    | 0.331231487 mirna_pc |
| 28157 hsa-mir-424 | VRK1      | 0.314259013 mirna_pc |
| 28158 hsa-mir-424 | ANP32B    | 0.300849642 mirna_pc |
| 28159 hsa-mir-424 | PRPS1     | 0.300113548 mirna_pc |
| 28160 hsa-mir-424 | MRPL36    | 0.375051774 mirna_pc |
| 28161 hsa-mir-424 | TWIST1    | 0.324837097 mirna_pc |
| 28162 hsa-mir-424 | RPL39L    | 0.403111664 mirna_pc |
| 28163 hsa-mir-424 | ACD       | 0.378137986 mirna_pc |
| 28164 hsa-mir-424 | GPN3      | 0.32314801 mirna_pc  |
| 28165 hsa-mir-424 | LOC152217 | 0.323864687 mirna_pc |
| 28166 hsa-mir-424 | NDUFS6    | 0.37718854 mirna_pc  |
| 28167 hsa-mir-424 | MAGEF1    | 0.339029457 mirna_pc |
| 28168 hsa-mir-424 | PCGF6     | 0.304356034 mirna_pc |
| 28169 hsa-mir-424 | OSTC      | 0.361121108 mirna_pc |
| 28170 hsa-mir-424 | MRPS5     | 0.314078978 mirna_pc |
| 28171 hsa-mir-424 | RPL37     | 0.327651629 mirna_pc |
| 28172 hsa-mir-424 | FAM92A1   | 0.331438567 mirna_pc |
| 28173 hsa-mir-424 | TIMM10    | 0.359130212 mirna_pc |
| 28174 hsa-mir-424 | ITPRIPL1  | 0.311554986 mirna_pc |
| 28175 hsa-mir-424 | MRPS30    | 0.354712426 mirna_pc |
| 28176 hsa-mir-424 | ANAPC10   | 0.310111232 mirna_pc |
| 28177 hsa-mir-424 | LDHB      | 0.316597463 mirna_pc |
| 28178 hsa-mir-424 | SLC25A17  | 0.333327579 mirna_pc |
| 28179 hsa-mir-424 | PSMC3     | 0.37857773 mirna_pc  |
| 28180 hsa-mir-424 | TRPA1     | 0.310248957 mirna_pc |
| 28181 hsa-mir-424 | RP9       | 0.385006527 mirna_pc |
| 28182 hsa-mir-424 | WDR70     | 0.334253517 mirna_pc |
| 28183 hsa-mir-424 | MRPL21    | 0.330765652 mirna_pc |
| 28184 hsa-mir-424 | FXR1      | 0.326841586 mirna_pc |
| 28185 hsa-mir-424 | RAD1      | 0.353456431 mirna_pc |
| 28186 hsa-mir-424 | C5orf13   | 0.301244724 mirna_pc |
| 28187 hsa-mir-424 | TARS      | 0.304617295 mirna_pc |

|                   |          |                      |
|-------------------|----------|----------------------|
| 28188 hsa-mir-424 | GPR3     | 0.347091025 mirna_pc |
| 28189 hsa-mir-424 | ZCRB1    | 0.327139271 mirna_pc |
| 28190 hsa-mir-424 | SLC4A1AP | 0.328926467 mirna_pc |
| 28191 hsa-mir-424 | TTC27    | 0.319608178 mirna_pc |
| 28192 hsa-mir-424 | C18orf55 | 0.351012501 mirna_pc |
| 28193 hsa-mir-424 | DUS2L    | 0.301467176 mirna_pc |
| 28194 hsa-mir-424 | COMMD9   | 0.300179863 mirna_pc |
| 28195 hsa-mir-424 | AAAS     | 0.324147795 mirna_pc |
| 28196 hsa-mir-424 | PELP1    | 0.344612664 mirna_pc |
| 28197 hsa-mir-424 | THOC1    | 0.302103142 mirna_pc |
| 28198 hsa-mir-424 | PAIP1    | 0.317480171 mirna_pc |
| 28199 hsa-mir-424 | COQ3     | 0.326175932 mirna_pc |
| 28200 hsa-mir-424 | PARL     | 0.324441704 mirna_pc |
| 28201 hsa-mir-424 | TMED1    | 0.313523028 mirna_pc |
| 28202 hsa-mir-424 | RPL35A   | 0.301335629 mirna_pc |
| 28203 hsa-mir-424 | NFATC3   | 0.324375727 mirna_pc |
| 28204 hsa-mir-424 | C12orf45 | 0.305493795 mirna_pc |
| 28205 hsa-mir-424 | BRD9     | 0.365490933 mirna_pc |
| 28206 hsa-mir-424 | PSMB6    | 0.340866405 mirna_pc |
| 28207 hsa-mir-424 | BASP1    | 0.337979301 mirna_pc |
| 28208 hsa-mir-424 | FRG1     | 0.36563719 mirna_pc  |
| 28209 hsa-mir-424 | SUB1     | 0.381648395 mirna_pc |
| 28210 hsa-mir-424 | MRPS24   | 0.328805804 mirna_pc |
| 28211 hsa-mir-424 | PQLC2    | 0.317788416 mirna_pc |
| 28212 hsa-mir-424 | GPX7     | 0.417129926 mirna_pc |
| 28213 hsa-mir-424 | C4orf27  | 0.306434026 mirna_pc |
| 28214 hsa-mir-424 | DDX28    | 0.364836694 mirna_pc |
| 28215 hsa-mir-424 | OSGEPL1  | 0.315355733 mirna_pc |
| 28216 hsa-mir-424 | LMAN2L   | 0.304468416 mirna_pc |
| 28217 hsa-mir-424 | C17orf81 | 0.34976135 mirna_pc  |
| 28218 hsa-mir-424 | C1D      | 0.328200775 mirna_pc |
| 28219 hsa-mir-424 | DDX19A   | 0.329414788 mirna_pc |
| 28220 hsa-mir-424 | MORN2    | 0.300020764 mirna_pc |
| 28221 hsa-mir-424 | DERL2    | 0.307105357 mirna_pc |
| 28222 hsa-mir-424 | MLLT11   | 0.350368655 mirna_pc |
| 28223 hsa-mir-424 | PMF1     | 0.329066773 mirna_pc |
| 28224 hsa-mir-424 | GALNT14  | 0.329885471 mirna_pc |
| 28225 hsa-mir-424 | NGFRAP1  | 0.325617637 mirna_pc |
| 28226 hsa-mir-424 | RANGRF   | 0.302156882 mirna_pc |
| 28227 hsa-mir-424 | WBP5     | 0.319787126 mirna_pc |
| 28228 hsa-mir-424 | RPP30    | 0.313629231 mirna_pc |
| 28229 hsa-mir-424 | ZNF622   | 0.323809398 mirna_pc |
| 28230 hsa-mir-424 | RASL11B  | 0.313904442 mirna_pc |
| 28231 hsa-mir-424 | PDGFA    | 0.31090004 mirna_pc  |
| 28232 hsa-mir-424 | DULLARD  | 0.307686116 mirna_pc |
| 28233 hsa-mir-424 | EXOSC6   | 0.30780173 mirna_pc  |
| 28234 hsa-mir-424 | FDX1L    | 0.344647159 mirna_pc |
| 28235 hsa-mir-424 | THAP11   | 0.355717669 mirna_pc |
| 28236 hsa-mir-424 | CLPTM1L  | 0.320691371 mirna_pc |
| 28237 hsa-mir-424 | NDUFB5   | 0.305302733 mirna_pc |
| 28238 hsa-mir-424 | H2AFY2   | 0.375171761 mirna_pc |
| 28239 hsa-mir-424 | C12orf43 | 0.304594128 mirna_pc |
| 28240 hsa-mir-424 | ALPK2    | 0.316918494 mirna_pc |
| 28241 hsa-mir-424 | ZCCHC17  | 0.315304361 mirna_pc |

|       |               |            |             |           |
|-------|---------------|------------|-------------|-----------|
| 28242 | hsa-mir-424   | C18orf21   | 0.325173873 | mirna_pc  |
| 28243 | hsa-mir-424   | CKAP4      | 0.316998789 | mirna_pc  |
| 28244 | hsa-mir-424   | TET1       | 0.304973629 | mirna_pc  |
| 28245 | hsa-mir-424   | SMYD2      | 0.318126196 | mirna_pc  |
| 28246 | hsa-mir-424   | TIMM22     | 0.357081397 | mirna_pc  |
| 28247 | hsa-mir-424   | MAP4K2     | 0.344259796 | mirna_pc  |
| 28248 | hsa-mir-30c-2 | ZNF710-AS1 | 0.499660645 | mirna_lnc |
| 28249 | hsa-mir-30c-2 | AC116407.1 | 0.459251789 | mirna_lnc |
| 28250 | hsa-mir-30c-2 | AC004836.1 | 0.470363361 | mirna_lnc |
| 28251 | hsa-mir-30c-2 | C9orf147   | 0.408513497 | mirna_lnc |
| 28252 | hsa-mir-30c-2 | AC012409.3 | 0.519749423 | mirna_lnc |
| 28253 | hsa-mir-30c-2 | AC025271.4 | 0.592205729 | mirna_lnc |
| 28254 | hsa-mir-30c-2 | AC123912.4 | 0.44184452  | mirna_lnc |
| 28255 | hsa-mir-30c-2 | AP001148.1 | 0.540593893 | mirna_lnc |
| 28256 | hsa-mir-30c-2 | AC015908.3 | 0.454098591 | mirna_lnc |
| 28257 | hsa-mir-30c-2 | BX284668.2 | 0.361464522 | mirna_lnc |
| 28258 | hsa-mir-30c-2 | AL158847.1 | 0.548144048 | mirna_lnc |
| 28259 | hsa-mir-30c-2 | AC024337.2 | 0.362163107 | mirna_lnc |
| 28260 | hsa-mir-30c-2 | AL158163.2 | 0.561439758 | mirna_lnc |
| 28261 | hsa-mir-30c-2 | LINC00940  | 0.50986163  | mirna_lnc |
| 28262 | hsa-mir-30c-2 | AC093583.1 | 0.462396486 | mirna_lnc |
| 28263 | hsa-mir-30c-2 | AC239798.2 | 0.508381927 | mirna_lnc |
| 28264 | hsa-mir-30c-2 | AL157392.2 | 0.431185073 | mirna_lnc |
| 28265 | hsa-mir-30c-2 | AP001528.3 | 0.35909057  | mirna_lnc |
| 28266 | hsa-mir-30c-2 | AC012409.5 | 0.364911701 | mirna_lnc |
| 28267 | hsa-mir-30c-2 | AP001528.2 | 0.416870344 | mirna_lnc |
| 28268 | hsa-mir-30c-2 | AC063919.1 | 0.42039342  | mirna_lnc |
| 28269 | hsa-mir-30c-2 | AC093797.1 | 0.319092832 | mirna_lnc |
| 28270 | hsa-mir-30c-2 | AC016251.1 | 0.413523654 | mirna_lnc |
| 28271 | hsa-mir-30c-2 | AC108472.1 | 0.321475423 | mirna_lnc |
| 28272 | hsa-mir-30c-2 | AC124312.3 | 0.372497999 | mirna_lnc |
| 28273 | hsa-mir-30c-2 | AC091563.1 | 0.342587585 | mirna_lnc |
| 28274 | hsa-mir-30c-2 | NGF-AS1    | 0.452808751 | mirna_lnc |
| 28275 | hsa-mir-30c-2 | AC244453.3 | 0.505444338 | mirna_lnc |
| 28276 | hsa-mir-30c-2 | LINC02489  | 0.360018423 | mirna_lnc |
| 28277 | hsa-mir-30c-2 | AL138847.2 | 0.560629183 | mirna_lnc |
| 28278 | hsa-mir-30c-2 | AL158206.1 | 0.354267016 | mirna_lnc |
| 28279 | hsa-mir-30c-2 | AP003117.1 | 0.496809102 | mirna_lnc |
| 28280 | hsa-mir-30c-2 | AL158163.1 | 0.558244541 | mirna_lnc |
| 28281 | hsa-mir-30c-2 | AP001972.5 | 0.358004738 | mirna_lnc |
| 28282 | hsa-mir-30c-2 | AC021016.2 | 0.486078264 | mirna_lnc |
| 28283 | hsa-mir-30c-2 | AC105074.1 | 0.349636934 | mirna_lnc |
| 28284 | hsa-mir-30c-2 | AC004982.1 | 0.497042699 | mirna_lnc |
| 28285 | hsa-mir-30c-2 | AL512328.1 | 0.374594656 | mirna_lnc |
| 28286 | hsa-mir-30c-2 | SPIN4-AS1  | 0.323107603 | mirna_lnc |
| 28287 | hsa-mir-30c-2 | AC073862.3 | 0.447422555 | mirna_lnc |
| 28288 | hsa-mir-30c-2 | AC091057.3 | 0.400838972 | mirna_lnc |
| 28289 | hsa-mir-30c-2 | AC079061.1 | 0.418767743 | mirna_lnc |
| 28290 | hsa-mir-30c-2 | LINC02447  | 0.382355591 | mirna_lnc |
| 28291 | hsa-mir-30c-2 | AP001094.2 | 0.467979683 | mirna_lnc |
| 28292 | hsa-mir-30c-2 | AC091544.5 | 0.32057192  | mirna_lnc |
| 28293 | hsa-mir-30c-2 | AC013726.1 | 0.478266242 | mirna_lnc |
| 28294 | hsa-mir-30c-2 | LINC01783  | 0.378962336 | mirna_lnc |
| 28295 | hsa-mir-30c-2 | AL031429.2 | 0.52328246  | mirna_lnc |



|                     |             |                        |
|---------------------|-------------|------------------------|
| 28296 hsa-mir-30c-2 | AC022558. 2 | 0. 307674673 mirna_lnc |
| 28297 hsa-mir-30c-2 | AL355073. 1 | 0. 360846142 mirna_lnc |
| 28298 hsa-mir-30c-2 | AC007193. 2 | 0. 323443058 mirna_lnc |
| 28299 hsa-mir-30c-2 | AC021766. 1 | 0. 336155981 mirna_lnc |
| 28300 hsa-mir-30c-2 | IDH2-DT     | 0. 480918509 mirna_lnc |
| 28301 hsa-mir-30c-2 | AC246680. 1 | 0. 482836695 mirna_lnc |
| 28302 hsa-mir-30c-2 | LINC01985   | 0. 310318603 mirna_lnc |
| 28303 hsa-mir-30c-2 | AL158212. 3 | 0. 302117784 mirna_lnc |
| 28304 hsa-mir-30c-2 | AL023973. 1 | 0. 316854215 mirna_lnc |
| 28305 hsa-mir-30c-2 | AC005225. 4 | 0. 352959404 mirna_lnc |
| 28306 hsa-mir-30c-2 | AC023794. 6 | 0. 385161155 mirna_lnc |
| 28307 hsa-mir-30c-2 | AC114810. 1 | 0. 437939176 mirna_lnc |
| 28308 hsa-mir-30c-2 | AL136164. 3 | 0. 497829019 mirna_lnc |
| 28309 hsa-mir-30c-2 | AC009078. 3 | 0. 321418467 mirna_lnc |
| 28310 hsa-mir-30c-2 | AL109936. 2 | 0. 428274672 mirna_lnc |
| 28311 hsa-mir-30c-2 | AC129492. 3 | 0. 493929041 mirna_lnc |
| 28312 hsa-mir-30c-2 | AC012409. 1 | 0. 492295439 mirna_lnc |
| 28313 hsa-mir-30c-2 | TRG-AS1     | 0. 437371308 mirna_lnc |
| 28314 hsa-mir-30c-2 | RPL34-AS1   | 0. 443874842 mirna_lnc |
| 28315 hsa-mir-30c-2 | AC007637. 1 | 0. 378078189 mirna_lnc |
| 28316 hsa-mir-30c-2 | AP001972. 1 | 0. 344227976 mirna_lnc |
| 28317 hsa-mir-30c-2 | AC244453. 1 | 0. 45312088 mirna_lnc  |
| 28318 hsa-mir-30c-2 | MAGI1-AS1   | 0. 378543174 mirna_lnc |
| 28319 hsa-mir-30c-2 | SEMA3B-AS1  | 0. 530534095 mirna_lnc |
| 28320 hsa-mir-30c-2 | LINC00365   | 0. 503763238 mirna_lnc |
| 28321 hsa-mir-30c-2 | HCG21       | 0. 426364015 mirna_lnc |
| 28322 hsa-mir-30c-2 | AC132154. 1 | 0. 49546877 mirna_lnc  |
| 28323 hsa-mir-30c-2 | AL138808. 1 | 0. 35403387 mirna_lnc  |
| 28324 hsa-mir-30c-2 | NCOA7-AS1   | 0. 519801329 mirna_lnc |
| 28325 hsa-mir-30c-2 | AC008669. 1 | 0. 42995727 mirna_lnc  |
| 28326 hsa-mir-30c-2 | AC024075. 1 | 0. 352395405 mirna_lnc |
| 28327 hsa-mir-30c-2 | FAM13A-AS1  | 0. 37245695 mirna_lnc  |
| 28328 hsa-mir-30c-2 | AC244131. 2 | 0. 325276282 mirna_lnc |
| 28329 hsa-mir-30c-2 | AC129492. 5 | 0. 368197196 mirna_lnc |
| 28330 hsa-mir-30c-2 | LINC02435   | 0. 397570716 mirna_lnc |
| 28331 hsa-mir-30c-2 | PCAT18      | 0. 519928031 mirna_lnc |
| 28332 hsa-mir-30c-2 | AL136309. 2 | 0. 344837981 mirna_lnc |
| 28333 hsa-mir-30c-2 | AL035701. 1 | 0. 354444371 mirna_lnc |
| 28334 hsa-mir-30c-2 | AC118344. 2 | 0. 38936191 mirna_lnc  |
| 28335 hsa-mir-30c-2 | AC138819. 1 | 0. 382129966 mirna_lnc |
| 28336 hsa-mir-30c-2 | AC018926. 1 | 0. 483976923 mirna_lnc |
| 28337 hsa-mir-30c-2 | SH3BP5-AS1  | 0. 435081004 mirna_lnc |
| 28338 hsa-mir-30c-2 | AL031587. 5 | 0. 372130491 mirna_lnc |
| 28339 hsa-mir-30c-2 | AC244453. 2 | 0. 493268243 mirna_lnc |
| 28340 hsa-mir-30c-2 | AC025470. 2 | 0. 339473512 mirna_lnc |
| 28341 hsa-mir-30c-2 | UGDH-AS1    | 0. 432562654 mirna_lnc |
| 28342 hsa-mir-30c-2 | AL109659. 2 | 0. 425746154 mirna_lnc |
| 28343 hsa-mir-30c-2 | FOXP1-AS1   | 0. 404883048 mirna_lnc |
| 28344 hsa-mir-30c-2 | AC024075. 2 | 0. 435891449 mirna_lnc |
| 28345 hsa-mir-30c-2 | AC037459. 2 | 0. 384904485 mirna_lnc |
| 28346 hsa-mir-30c-2 | AC005495. 1 | 0. 328942872 mirna_lnc |
| 28347 hsa-mir-30c-2 | DNAJC9-AS1  | 0. 431894191 mirna_lnc |
| 28348 hsa-mir-30c-2 | AL020997. 3 | 0. 523024075 mirna_lnc |
| 28349 hsa-mir-30c-2 | AL035448. 1 | 0. 473967126 mirna_lnc |

|       |               |             |             |           |
|-------|---------------|-------------|-------------|-----------|
| 28350 | hsa-mir-30c-2 | PSMD6-AS2   | 0.407805133 | mirna_lnc |
| 28351 | hsa-mir-30c-2 | AP003355.2  | 0.309315274 | mirna_lnc |
| 28352 | hsa-mir-30c-2 | AC012557.1  | 0.437108357 | mirna_lnc |
| 28353 | hsa-mir-30c-2 | AL137793.1  | 0.351734121 | mirna_lnc |
| 28354 | hsa-mir-30c-2 | AL160286.2  | 0.428701671 | mirna_lnc |
| 28355 | hsa-mir-30c-2 | AC025917.1  | 0.361009085 | mirna_lnc |
| 28356 | hsa-mir-30c-2 | AC009119.3  | 0.362065202 | mirna_lnc |
| 28357 | hsa-mir-30c-2 | PWAR5       | 0.306767356 | mirna_lnc |
| 28358 | hsa-mir-30c-2 | AC098869.2  | 0.324938069 | mirna_lnc |
| 28359 | hsa-mir-30c-2 | AC021491.2  | 0.340745111 | mirna_lnc |
| 28360 | hsa-mir-30c-2 | AC139887.4  | 0.443551531 | mirna_lnc |
| 28361 | hsa-mir-30c-2 | AP003486.1  | 0.319062729 | mirna_lnc |
| 28362 | hsa-mir-30c-2 | AC138956.2  | 0.421305346 | mirna_lnc |
| 28363 | hsa-mir-30c-2 | AC021205.3  | 0.408367526 | mirna_lnc |
| 28364 | hsa-mir-30c-2 | AC006942.1  | 0.401424002 | mirna_lnc |
| 28365 | hsa-mir-30c-2 | AL731557.1  | 0.369773391 | mirna_lnc |
| 28366 | hsa-mir-30c-2 | AL391834.2  | 0.308384138 | mirna_lnc |
| 28367 | hsa-mir-30c-2 | AL138930.1  | 0.463783983 | mirna_lnc |
| 28368 | hsa-mir-30c-2 | AC093607.1  | 0.333112981 | mirna_lnc |
| 28369 | hsa-mir-30c-2 | AC006946.3  | 0.385840017 | mirna_lnc |
| 28370 | hsa-mir-30c-2 | CACNA1C-AS2 | 0.316524543 | mirna_lnc |
| 28371 | hsa-mir-30c-2 | AC012181.1  | 0.386218202 | mirna_lnc |
| 28372 | hsa-mir-30c-2 | AC073476.3  | 0.387319758 | mirna_lnc |
| 28373 | hsa-mir-30c-2 | AC111182.1  | 0.488017102 | mirna_lnc |
| 28374 | hsa-mir-30c-2 | AC011816.2  | 0.320178142 | mirna_lnc |
| 28375 | hsa-mir-30c-2 | PACRG-AS1   | 0.334742864 | mirna_lnc |
| 28376 | hsa-mir-30c-2 | Z69706.1    | 0.368233686 | mirna_lnc |
| 28377 | hsa-mir-30c-2 | AC010776.2  | 0.392840887 | mirna_lnc |
| 28378 | hsa-mir-30c-2 | AC024075.3  | 0.319369021 | mirna_lnc |
| 28379 | hsa-mir-30c-2 | AC100823.1  | 0.510955004 | mirna_lnc |
| 28380 | hsa-mir-30c-2 | AC012181.2  | 0.31736611  | mirna_lnc |
| 28381 | hsa-mir-30c-2 | AC008121.2  | 0.363988203 | mirna_lnc |
| 28382 | hsa-mir-30c-2 | AC010632.1  | 0.313157447 | mirna_lnc |
| 28383 | hsa-mir-30c-2 | AC022893.1  | 0.455594407 | mirna_lnc |
| 28384 | hsa-mir-30c-2 | AC112236.2  | 0.314477642 | mirna_lnc |
| 28385 | hsa-mir-30c-2 | AC018926.3  | 0.511438508 | mirna_lnc |
| 28386 | hsa-mir-30c-2 | AC083843.4  | 0.322834146 | mirna_lnc |
| 28387 | hsa-mir-30c-2 | AC012409.2  | 0.35929337  | mirna_lnc |
| 28388 | hsa-mir-30c-2 | AC079305.3  | 0.507247342 | mirna_lnc |
| 28389 | hsa-mir-30c-2 | AC018445.4  | 0.303882722 | mirna_lnc |
| 28390 | hsa-mir-30c-2 | CEBPB-AS1   | 0.389598315 | mirna_lnc |
| 28391 | hsa-mir-30c-2 | AL162171.3  | 0.368115455 | mirna_lnc |
| 28392 | hsa-mir-30c-2 | LINC02060   | 0.303465217 | mirna_lnc |
| 28393 | hsa-mir-30c-2 | AC023830.3  | 0.331241083 | mirna_lnc |
| 28394 | hsa-mir-30c-2 | AC130650.1  | 0.338864339 | mirna_lnc |
| 28395 | hsa-mir-30c-2 | AC068880.4  | 0.300562837 | mirna_lnc |
| 28396 | hsa-mir-30c-2 | AC009090.3  | 0.387204425 | mirna_lnc |
| 28397 | hsa-mir-30c-2 | AC108449.2  | 0.303432184 | mirna_lnc |
| 28398 | hsa-mir-30c-2 | AC007950.3  | 0.324210025 | mirna_lnc |
| 28399 | hsa-mir-30c-2 | AC109454.4  | 0.411761878 | mirna_lnc |
| 28400 | hsa-mir-30c-2 | AC007342.6  | 0.330224943 | mirna_lnc |
| 28401 | hsa-mir-30c-2 | AC104117.3  | 0.320634999 | mirna_lnc |
| 28402 | hsa-mir-30c-2 | AL031726.1  | 0.351674528 | mirna_lnc |
| 28403 | hsa-mir-30c-2 | LOH12CR2    | 0.437115832 | mirna_lnc |

|                     |             |                       |
|---------------------|-------------|-----------------------|
| 28404 hsa-mir-30c-2 | AC010136.1  | 0.309926071 mirna_lnc |
| 28405 hsa-mir-30c-2 | ZRANB2-AS1  | 0.498012905 mirna_lnc |
| 28406 hsa-mir-30c-2 | AC016924.1  | 0.365327787 mirna_lnc |
| 28407 hsa-mir-30c-2 | AC008764.2  | 0.30026458 mirna_lnc  |
| 28408 hsa-mir-30c-2 | AC010226.1  | 0.34542538 mirna_lnc  |
| 28409 hsa-mir-30c-2 | AC135050.6  | 0.344683227 mirna_lnc |
| 28410 hsa-mir-30c-2 | AC095057.3  | 0.508670017 mirna_lnc |
| 28411 hsa-mir-30c-2 | AC015961.1  | 0.350532859 mirna_lnc |
| 28412 hsa-mir-30c-2 | C9orf106    | 0.325646656 mirna_lnc |
| 28413 hsa-mir-30c-2 | KIF9-AS1    | 0.303151855 mirna_lnc |
| 28414 hsa-mir-30c-2 | AL356273.3  | 0.414776988 mirna_lnc |
| 28415 hsa-mir-30c-2 | AC107072.2  | 0.3001112 mirna_lnc   |
| 28416 hsa-mir-30c-2 | AC010997.6  | 0.322081989 mirna_lnc |
| 28417 hsa-mir-30c-2 | LINC01954   | 0.38817808 mirna_lnc  |
| 28418 hsa-mir-30c-2 | AC020951.1  | 0.319229834 mirna_lnc |
| 28419 hsa-mir-30c-2 | AP003721.4  | 0.399592712 mirna_lnc |
| 28420 hsa-mir-30c-2 | AC010210.1  | 0.321639043 mirna_lnc |
| 28421 hsa-mir-30c-2 | AC008663.2  | 0.331976707 mirna_lnc |
| 28422 hsa-mir-30c-2 | HEXA-AS1    | 0.304276195 mirna_lnc |
| 28423 hsa-mir-30c-2 | AC005746.1  | 0.324726868 mirna_lnc |
| 28424 hsa-mir-30c-2 | AL359715.3  | 0.34402204 mirna_lnc  |
| 28425 hsa-mir-30c-2 | AC010201.2  | 0.487771359 mirna_lnc |
| 28426 hsa-mir-30c-2 | AC016251.2  | 0.319802957 mirna_lnc |
| 28427 hsa-mir-30c-2 | AC006960.3  | 0.310361467 mirna_lnc |
| 28428 hsa-mir-30c-2 | ERVE-1      | 0.388177032 mirna_lnc |
| 28429 hsa-mir-30c-2 | AC073167.1  | 0.346109646 mirna_lnc |
| 28430 hsa-mir-30c-2 | AC015961.2  | 0.367077532 mirna_lnc |
| 28431 hsa-mir-30c-2 | SSBP3-AS1   | 0.428039598 mirna_lnc |
| 28432 hsa-mir-30c-2 | Z97989.1    | 0.383662364 mirna_lnc |
| 28433 hsa-mir-30c-2 | AC064807.2  | 0.474477444 mirna_lnc |
| 28434 hsa-mir-30c-2 | AC084036.1  | 0.522367842 mirna_lnc |
| 28435 hsa-mir-30c-2 | AC079322.1  | 0.454148284 mirna_lnc |
| 28436 hsa-mir-30c-2 | AC022898.2  | 0.398818577 mirna_lnc |
| 28437 hsa-mir-30c-2 | DCXR-DT     | 0.305574899 mirna_lnc |
| 28438 hsa-mir-30c-2 | AL445223.1  | 0.337236131 mirna_lnc |
| 28439 hsa-mir-30c-2 | AL391834.1  | 0.301504741 mirna_lnc |
| 28440 hsa-mir-30c-2 | AC091588.1  | 0.350059679 mirna_lnc |
| 28441 hsa-mir-30c-2 | Z73965.1    | 0.402451459 mirna_lnc |
| 28442 hsa-mir-30c-2 | AC139768.2  | 0.324497584 mirna_lnc |
| 28443 hsa-mir-30c-2 | AL136982.3  | 0.411197473 mirna_lnc |
| 28444 hsa-mir-30c-2 | AC036176.1  | 0.349416831 mirna_lnc |
| 28445 hsa-mir-30c-2 | AC139795.2  | 0.34819624 mirna_lnc  |
| 28446 hsa-mir-30c-2 | AC053513.1  | 0.370064762 mirna_lnc |
| 28447 hsa-mir-30c-2 | AC138956.1  | 0.347462249 mirna_lnc |
| 28448 hsa-mir-30c-2 | AC007342.7  | 0.375310912 mirna_lnc |
| 28449 hsa-mir-30c-2 | AC009090.1  | 0.358550613 mirna_lnc |
| 28450 hsa-mir-30c-2 | AC010201.1  | 0.423744896 mirna_lnc |
| 28451 hsa-mir-30c-2 | AC074032.1  | 0.363708602 mirna_lnc |
| 28452 hsa-mir-30c-2 | AC027117.2  | 0.370685589 mirna_lnc |
| 28453 hsa-mir-30c-2 | L3MBTL4-AS1 | 0.401462754 mirna_lnc |
| 28454 hsa-mir-30c-2 | AC125437.2  | 0.404093029 mirna_lnc |
| 28455 hsa-mir-30c-2 | AC124312.2  | 0.424696868 mirna_lnc |
| 28456 hsa-mir-30c-2 | AC100830.2  | 0.368801478 mirna_lnc |
| 28457 hsa-mir-30c-2 | AC024580.1  | 0.406425207 mirna_lnc |

|                     |            |                       |
|---------------------|------------|-----------------------|
| 28458 hsa-mir-30c-2 | AC008731.1 | 0.315754231 mirna_lnc |
| 28459 hsa-mir-30c-2 | AL021368.2 | 0.350299802 mirna_lnc |
| 28460 hsa-mir-30c-2 | AC012358.1 | 0.430346536 mirna_lnc |
| 28461 hsa-mir-30c-2 | AC108704.2 | 0.392743632 mirna_lnc |
| 28462 hsa-mir-30c-2 | AC084018.2 | 0.325475964 mirna_lnc |
| 28463 hsa-mir-30c-2 | Z97652.1   | 0.395350519 mirna_lnc |
| 28464 hsa-mir-30c-2 | AL356740.1 | 0.315948687 mirna_lnc |
| 28465 hsa-mir-30c-2 | AC016590.2 | 0.302325438 mirna_lnc |
| 28466 hsa-mir-30c-2 | AL117339.4 | 0.355136594 mirna_lnc |
| 28467 hsa-mir-30c-2 | AL008582.1 | 0.328169219 mirna_lnc |
| 28468 hsa-mir-30c-2 | AC093726.1 | 0.518972683 mirna_lnc |
| 28469 hsa-mir-30c-2 | AC008121.3 | 0.336025421 mirna_lnc |
| 28470 hsa-mir-30c-2 | AL034347.1 | 0.427652978 mirna_lnc |
| 28471 hsa-mir-30c-2 | AC006116.4 | 0.377969757 mirna_lnc |
| 28472 hsa-mir-30c-2 | AC010525.1 | 0.316941592 mirna_lnc |
| 28473 hsa-mir-30c-2 | AC121761.2 | 0.328237332 mirna_lnc |
| 28474 hsa-mir-30c-2 | AL121895.2 | 0.405477052 mirna_lnc |
| 28475 hsa-mir-30c-2 | AL365330.1 | 0.382559278 mirna_lnc |
| 28476 hsa-mir-30c-2 | AC127164.1 | 0.350713046 mirna_lnc |
| 28477 hsa-mir-30c-2 | AC009118.3 | 0.443341149 mirna_lnc |
| 28478 hsa-mir-30c-2 | AC078906.1 | 0.519749418 mirna_lnc |
| 28479 hsa-mir-30c-2 | AC013356.3 | 0.305153396 mirna_lnc |
| 28480 hsa-mir-30c-2 | AL121655.1 | 0.374623935 mirna_lnc |
| 28481 hsa-mir-30c-2 | AC007878.1 | 0.39349629 mirna_lnc  |
| 28482 hsa-mir-30c-2 | POU6F2-AS1 | 0.47636783 mirna_lnc  |
| 28483 hsa-mir-30c-2 | AP002812.3 | 0.342426823 mirna_lnc |
| 28484 hsa-mir-30c-2 | AC007787.2 | 0.338371533 mirna_lnc |
| 28485 hsa-mir-30c-2 | OCIAD1-AS1 | 0.338692201 mirna_lnc |
| 28486 hsa-mir-30c-2 | AP000766.1 | 0.36276542 mirna_lnc  |
| 28487 hsa-mir-30c-2 | AC004241.2 | 0.310729447 mirna_lnc |
| 28488 hsa-mir-30c-2 | AC027279.1 | 0.346956314 mirna_lnc |
| 28489 hsa-mir-30c-2 | AL080317.3 | 0.326973025 mirna_lnc |
| 28490 hsa-mir-30c-2 | AC112722.1 | 0.358164372 mirna_lnc |
| 28491 hsa-mir-30c-2 | AL355073.2 | 0.363021922 mirna_lnc |
| 28492 hsa-mir-30c-2 | AL162511.1 | 0.444043878 mirna_lnc |
| 28493 hsa-mir-30c-2 | AL157762.1 | 0.303735232 mirna_lnc |
| 28494 hsa-mir-30c-2 | AC107952.2 | 0.399823382 mirna_lnc |
| 28495 hsa-mir-30c-2 | LINC02367  | 0.330205893 mirna_lnc |
| 28496 hsa-mir-30c-2 | AC027698.1 | 0.321738451 mirna_lnc |
| 28497 hsa-mir-30c-2 | AC011815.3 | 0.350102375 mirna_lnc |
| 28498 hsa-mir-30c-2 | AL157823.2 | 0.417473111 mirna_lnc |
| 28499 hsa-mir-30c-2 | AC092279.2 | 0.301278666 mirna_lnc |
| 28500 hsa-mir-30c-2 | AC114730.3 | 0.335240646 mirna_lnc |
| 28501 hsa-mir-30c-2 | AC012404.2 | 0.312500876 mirna_lnc |
| 28502 hsa-mir-30c-2 | AC011944.2 | 0.342062695 mirna_lnc |
| 28503 hsa-mir-30c-2 | AL445686.2 | 0.31177873 mirna_lnc  |
| 28504 hsa-mir-30c-2 | AC108861.1 | 0.345544014 mirna_lnc |
| 28505 hsa-mir-30c-2 | AC012360.3 | 0.357530078 mirna_lnc |
| 28506 hsa-mir-30c-2 | AC125494.2 | 0.371504054 mirna_lnc |
| 28507 hsa-mir-30c-2 | AP001094.3 | 0.507940859 mirna_lnc |
| 28508 hsa-mir-30c-2 | AC008079.1 | 0.344546166 mirna_lnc |
| 28509 hsa-mir-30c-2 | AC011815.2 | 0.316112006 mirna_lnc |
| 28510 hsa-mir-30c-2 | AC024941.1 | 0.400228874 mirna_lnc |
| 28511 hsa-mir-30c-2 | AC016705.2 | 0.363267838 mirna_lnc |

|                     |             |                       |
|---------------------|-------------|-----------------------|
| 28512 hsa-mir-30c-2 | AC007038.1  | 0.361154695 mirna_lnc |
| 28513 hsa-mir-30c-2 | AC006116.10 | 0.55542668 mirna_lnc  |
| 28514 hsa-mir-30c-2 | AC015726.1  | 0.388683872 mirna_lnc |
| 28515 hsa-mir-30c-2 | RRS1-AS1    | 0.396493905 mirna_lnc |
| 28516 hsa-mir-30c-2 | AC139887.1  | 0.42902802 mirna_lnc  |
| 28517 hsa-mir-30c-2 | AC092620.1  | 0.315525038 mirna_lnc |
| 28518 hsa-mir-30c-2 | AC007619.1  | 0.423251141 mirna_lnc |
| 28519 hsa-mir-30c-2 | FOXP1-IT1   | 0.327639253 mirna_lnc |
| 28520 hsa-mir-30c-2 | AC097460.3  | 0.330864939 mirna_lnc |
| 28521 hsa-mir-30c-2 | AF129075.1  | 0.357212432 mirna_lnc |
| 28522 hsa-mir-30c-2 | AL353746.1  | 0.417039857 mirna_lnc |
| 28523 hsa-mir-30c-2 | AL133243.2  | 0.354433571 mirna_lnc |
| 28524 hsa-mir-30c-2 | AP002812.2  | 0.327991001 mirna_lnc |
| 28525 hsa-mir-30c-2 | AC018638.6  | 0.354768673 mirna_lnc |
| 28526 hsa-mir-30c-2 | AC109347.2  | 0.403649906 mirna_lnc |
| 28527 hsa-mir-30c-2 | AC091965.5  | 0.349030925 mirna_lnc |
| 28528 hsa-mir-30c-2 | AC018638.7  | 0.444366452 mirna_lnc |
| 28529 hsa-mir-30c-2 | AC092343.1  | 0.304111367 mirna_lnc |
| 28530 hsa-mir-30c-2 | AC013468.1  | 0.453161325 mirna_lnc |
| 28531 hsa-mir-30c-2 | UMODL1-AS1  | 0.335124844 mirna_lnc |
| 28532 hsa-mir-30c-2 | LINC02640   | 0.433962104 mirna_lnc |
| 28533 hsa-mir-30c-2 | AC021483.1  | 0.319580729 mirna_lnc |
| 28534 hsa-mir-30c-2 | EIF3J-DT    | 0.319875485 mirna_lnc |
| 28535 hsa-mir-30c-2 | AC093690.1  | 0.3537342 mirna_lnc   |
| 28536 hsa-mir-30c-2 | AL117350.1  | 0.379662039 mirna_lnc |
| 28537 hsa-mir-30c-2 | AL157392.4  | 0.338013533 mirna_lnc |
| 28538 hsa-mir-30c-2 | AC023509.2  | 0.353157814 mirna_lnc |
| 28539 hsa-mir-30c-2 | AC084262.1  | 0.451632441 mirna_lnc |
| 28540 hsa-mir-30c-2 | AC026992.2  | 0.30789251 mirna_lnc  |
| 28541 hsa-mir-30c-2 | AC012074.1  | 0.338240732 mirna_lnc |
| 28542 hsa-mir-30c-2 | LINC01772   | 0.350273371 mirna_lnc |
| 28543 hsa-mir-30c-2 | AC105339.5  | 0.367143436 mirna_lnc |
| 28544 hsa-mir-30c-2 | AC007684.1  | 0.38750238 mirna_lnc  |
| 28545 hsa-mir-30c-2 | AC138512.1  | 0.395574851 mirna_lnc |
| 28546 hsa-mir-30c-2 | AC093330.1  | 0.399676595 mirna_lnc |
| 28547 hsa-mir-30c-2 | AC010186.3  | 0.33123149 mirna_lnc  |
| 28548 hsa-mir-30c-2 | AC118344.1  | 0.315397396 mirna_lnc |
| 28549 hsa-mir-30c-2 | AL604028.1  | 0.313821368 mirna_lnc |
| 28550 hsa-mir-30c-2 | AC022306.2  | 0.365126719 mirna_lnc |
| 28551 hsa-mir-30c-2 | AC016722.2  | 0.442137537 mirna_lnc |
| 28552 hsa-mir-30c-2 | AC005674.2  | 0.311288946 mirna_lnc |
| 28553 hsa-mir-30c-2 | AC097634.1  | 0.373610001 mirna_lnc |
| 28554 hsa-mir-30c-2 | AC092692.1  | 0.340644833 mirna_lnc |
| 28555 hsa-mir-30c-2 | AC093227.1  | 0.353879582 mirna_lnc |
| 28556 hsa-mir-30c-2 | AC104113.1  | 0.300852622 mirna_lnc |
| 28557 hsa-mir-30c-2 | AL357874.2  | 0.341043837 mirna_lnc |
| 28558 hsa-mir-30c-2 | AC022898.1  | 0.334402672 mirna_lnc |
| 28559 hsa-mir-30c-2 | AL645568.1  | 0.323010427 mirna_lnc |
| 28560 hsa-mir-30c-2 | AC084824.3  | 0.387802927 mirna_lnc |
| 28561 hsa-mir-30c-2 | AC020612.3  | 0.309489747 mirna_lnc |
| 28562 hsa-mir-30c-2 | AC079145.1  | 0.410057384 mirna_lnc |
| 28563 hsa-mir-30c-2 | LIMD1-AS1   | 0.319241286 mirna_lnc |
| 28564 hsa-mir-30c-2 | AL356124.2  | 0.45084582 mirna_lnc  |
| 28565 hsa-mir-30c-2 | AC093726.2  | 0.429074399 mirna_lnc |

|                     |            |                       |
|---------------------|------------|-----------------------|
| 28566 hsa-mir-30c-2 | LINC02234  | 0.440509909 mirna_lnc |
| 28567 hsa-mir-30c-2 | TET2-AS1   | 0.313427908 mirna_lnc |
| 28568 hsa-mir-30c-2 | TMC01-AS1  | 0.342377285 mirna_lnc |
| 28569 hsa-mir-30c-2 | AL359710.1 | 0.365662881 mirna_lnc |
| 28570 hsa-mir-30c-2 | AL121652.1 | 0.352573266 mirna_lnc |
| 28571 hsa-mir-30c-2 | AP001094.1 | 0.364768845 mirna_lnc |
| 28572 hsa-mir-30c-2 | AC022497.1 | 0.446930639 mirna_lnc |
| 28573 hsa-mir-30c-2 | AL008721.2 | 0.335225725 mirna_lnc |
| 28574 hsa-mir-30c-2 | AC114939.1 | 0.391909886 mirna_lnc |
| 28575 hsa-mir-30c-2 | AC084782.3 | 0.355542258 mirna_lnc |
| 28576 hsa-mir-30c-2 | AL132656.2 | 0.34770947 mirna_lnc  |
| 28577 hsa-mir-30c-2 | AC000124.1 | 0.319504062 mirna_lnc |
| 28578 hsa-mir-30c-2 | AC009318.3 | 0.403050358 mirna_lnc |
| 28579 hsa-mir-30c-2 | AC090206.1 | 0.38637196 mirna_lnc  |
| 28580 hsa-mir-30c-2 | AC234775.3 | 0.376374555 mirna_lnc |
| 28581 hsa-mir-30c-2 | FOXN3-AS2  | 0.38231909 mirna_lnc  |
| 28582 hsa-mir-30c-2 | AL109947.1 | 0.312122158 mirna_lnc |
| 28583 hsa-mir-30c-2 | AC073896.3 | 0.46798138 mirna_lnc  |
| 28584 hsa-mir-30c-2 | AC005034.5 | 0.3397978 mirna_lnc   |
| 28585 hsa-mir-30c-2 | AL354872.2 | 0.346323298 mirna_lnc |
| 28586 hsa-mir-30c-2 | AL513365.2 | 0.356742124 mirna_lnc |
| 28587 hsa-mir-30c-2 | DPH6-DT    | 0.316121471 mirna_lnc |
| 28588 hsa-mir-30c-2 | AC090772.2 | 0.359721516 mirna_lnc |
| 28589 hsa-mir-30c-2 | SLFNL1-AS1 | 0.300749283 mirna_lnc |
| 28590 hsa-mir-30c-2 | LINC00653  | 0.346504706 mirna_lnc |
| 28591 hsa-mir-30c-2 | AC055822.1 | 0.350411144 mirna_lnc |
| 28592 hsa-mir-30c-2 | AC092718.1 | 0.343040101 mirna_lnc |
| 28593 hsa-mir-30c-2 | AL132989.1 | 0.331130674 mirna_lnc |
| 28594 hsa-mir-30c-2 | AC012435.2 | 0.306542388 mirna_lnc |
| 28595 hsa-mir-30c-2 | AC105339.3 | 0.338197783 mirna_lnc |
| 28596 hsa-mir-30c-2 | AC103923.1 | 0.307549895 mirna_lnc |
| 28597 hsa-mir-30c-2 | AL606760.2 | 0.401982269 mirna_lnc |
| 28598 hsa-mir-30c-2 | HGC6.3     | 0.352420623 mirna_lnc |
| 28599 hsa-mir-30c-2 | AC135586.2 | 0.450161231 mirna_lnc |
| 28600 hsa-mir-30c-2 | AC127024.4 | 0.316506956 mirna_lnc |
| 28601 hsa-mir-30c-2 | AC005838.2 | 0.452762019 mirna_lnc |
| 28602 hsa-mir-30c-2 | AC025430.1 | 0.31460995 mirna_lnc  |
| 28603 hsa-mir-30c-2 | AC074029.3 | 0.368208673 mirna_lnc |
| 28604 hsa-mir-30c-2 | Z93930.3   | 0.307738543 mirna_lnc |
| 28605 hsa-mir-30c-2 | AC073534.2 | 0.435022033 mirna_lnc |
| 28606 hsa-mir-30c-2 | AC006206.1 | 0.303349768 mirna_lnc |
| 28607 hsa-mir-30c-2 | AC006213.5 | 0.381232845 mirna_lnc |
| 28608 hsa-mir-30c-2 | UBE2D3-AS1 | 0.345772287 mirna_lnc |
| 28609 hsa-mir-30c-2 | AC022400.6 | 0.378169568 mirna_lnc |
| 28610 hsa-mir-30c-2 | AC027682.7 | 0.344727572 mirna_lnc |
| 28611 hsa-mir-30c-2 | AC010326.3 | 0.312690122 mirna_lnc |
| 28612 hsa-mir-30c-2 | CHRM3-AS1  | 0.303968923 mirna_lnc |
| 28613 hsa-mir-30c-2 | AC135776.1 | 0.318766915 mirna_lnc |
| 28614 hsa-mir-30c-2 | AC016747.3 | 0.404004694 mirna_lnc |
| 28615 hsa-mir-30c-2 | NADK2-AS1  | 0.391707826 mirna_lnc |
| 28616 hsa-mir-30c-2 | AC126407.1 | 0.321565377 mirna_lnc |
| 28617 hsa-mir-30c-2 | ITPR1-DT   | 0.318704809 mirna_lnc |
| 28618 hsa-mir-30c-2 | LINC00412  | 0.313840788 mirna_lnc |
| 28619 hsa-mir-30c-2 | LINC01891  | 0.304723172 mirna_lnc |

|       |               |            |             |           |
|-------|---------------|------------|-------------|-----------|
| 28620 | hsa-mir-30c-2 | AC010285.1 | 0.35165893  | mirna_lnc |
| 28621 | hsa-mir-30c-2 | AC018809.1 | 0.352028265 | mirna_lnc |
| 28622 | hsa-mir-30c-2 | AC007485.2 | 0.32338153  | mirna_lnc |
| 28623 | hsa-mir-30c-2 | AC011477.3 | 0.348381191 | mirna_lnc |
| 28624 | hsa-mir-30c-2 | AC104596.1 | 0.396672563 | mirna_lnc |
| 28625 | hsa-mir-30c-2 | AC063965.1 | 0.328753613 | mirna_lnc |
| 28626 | hsa-mir-30c-2 | AC117503.4 | 0.338498328 | mirna_lnc |
| 28627 | hsa-mir-30c-2 | AC110792.3 | 0.313409013 | mirna_lnc |
| 28628 | hsa-mir-30c-2 | AC004148.2 | 0.342651751 | mirna_lnc |
| 28629 | hsa-mir-30c-2 | DDN-AS1    | 0.317445856 | mirna_lnc |
| 28630 | hsa-mir-30c-2 | AP001178.3 | 0.328879093 | mirna_lnc |
| 28631 | hsa-mir-30c-2 | AL078621.3 | 0.303309891 | mirna_lnc |
| 28632 | hsa-mir-30c-2 | AC027271.1 | 0.33947882  | mirna_lnc |
| 28633 | hsa-mir-30c-2 | AC090425.2 | 0.349047611 | mirna_lnc |
| 28634 | hsa-mir-30c-2 | AC090186.1 | 0.322852357 | mirna_lnc |
| 28635 | hsa-mir-30c-2 | AC027607.1 | 0.328772521 | mirna_lnc |
| 28636 | hsa-mir-30c-2 | AL163051.2 | 0.322486534 | mirna_lnc |
| 28637 | hsa-mir-30c-2 | AC007406.5 | 0.31075039  | mirna_lnc |
| 28638 | hsa-mir-30c-2 | U73166.1   | 0.32826627  | mirna_lnc |
| 28639 | hsa-mir-30c-2 | AC005332.3 | 0.368745048 | mirna_lnc |
| 28640 | hsa-mir-30c-2 | AC053527.1 | 0.332911468 | mirna_lnc |
| 28641 | hsa-mir-30c-2 | AC087623.1 | 0.301295362 | mirna_lnc |
| 28642 | hsa-mir-30c-2 | AC092953.2 | 0.345045786 | mirna_lnc |
| 28643 | hsa-mir-30c-2 | AC009779.2 | 0.343010993 | mirna_lnc |
| 28644 | hsa-mir-30c-2 | AL121906.2 | 0.304728966 | mirna_lnc |
| 28645 | hsa-mir-30c-2 | AL136368.1 | 0.333540852 | mirna_lnc |
| 28646 | hsa-mir-30c-2 | SOS1-IT1   | 0.474129817 | mirna_lnc |
| 28647 | hsa-mir-30c-2 | AC005104.1 | 0.31344546  | mirna_lnc |
| 28648 | hsa-mir-30c-2 | AL603832.1 | 0.322594431 | mirna_lnc |
| 28649 | hsa-mir-30c-2 | AP003170.3 | 0.48989566  | mirna_lnc |
| 28650 | hsa-mir-30c-2 | AC087500.2 | 0.33813226  | mirna_lnc |
| 28651 | hsa-mir-30c-2 | AC087501.4 | 0.3186921   | mirna_lnc |
| 28652 | hsa-mir-30c-2 | AC008739.5 | 0.352201824 | mirna_lnc |
| 28653 | hsa-mir-30c-2 | AC021491.4 | 0.456957833 | mirna_lnc |
| 28654 | hsa-mir-30c-2 | AL589990.1 | 0.304094586 | mirna_lnc |
| 28655 | hsa-mir-30c-2 | AC093525.7 | 0.306346479 | mirna_lnc |
| 28656 | hsa-mir-30c-2 | AC010168.2 | 0.353459149 | mirna_lnc |
| 28657 | hsa-mir-30c-2 | AC004771.5 | 0.308838329 | mirna_lnc |
| 28658 | hsa-mir-30c-2 | AC093752.3 | 0.32298936  | mirna_lnc |
| 28659 | hsa-mir-30c-2 | AC090772.1 | 0.354879017 | mirna_lnc |
| 28660 | hsa-mir-30c-2 | AC000068.1 | 0.419804236 | mirna_lnc |
| 28661 | hsa-mir-30c-2 | AC016910.1 | 0.315662378 | mirna_lnc |
| 28662 | hsa-mir-30c-2 | AC023355.1 | 0.319225283 | mirna_lnc |
| 28663 | hsa-mir-30c-2 | AC009107.2 | 0.351797977 | mirna_lnc |
| 28664 | hsa-mir-30c-2 | AC055713.1 | 0.339868041 | mirna_lnc |
| 28665 | hsa-mir-30c-2 | AC015871.3 | 0.33238907  | mirna_lnc |
| 28666 | hsa-mir-30c-2 | AL135905.1 | 0.312033761 | mirna_lnc |
| 28667 | hsa-mir-30c-2 | AC000068.2 | 0.378416192 | mirna_lnc |
| 28668 | hsa-mir-30c-2 | AC009108.3 | 0.319115645 | mirna_lnc |
| 28669 | hsa-mir-30c-2 | AP000254.1 | 0.324263152 | mirna_lnc |
| 28670 | hsa-mir-30c-2 | AL031186.1 | 0.479969935 | mirna_lnc |
| 28671 | hsa-mir-30c-2 | AC002553.2 | 0.340327587 | mirna_lnc |
| 28672 | hsa-mir-30c-2 | AC010547.1 | 0.32631019  | mirna_lnc |
| 28673 | hsa-mir-30c-2 | AC130895.1 | 0.300285146 | mirna_lnc |

|                     |            |                       |
|---------------------|------------|-----------------------|
| 28674 hsa-mir-30c-2 | AC012557.2 | 0.471208298 mirna_lnc |
| 28675 hsa-mir-30c-2 | AC011450.1 | 0.325860886 mirna_lnc |
| 28676 hsa-mir-30c-2 | AC113139.1 | 0.30370776 mirna_lnc  |
| 28677 hsa-mir-30c-2 | AC046168.1 | 0.31899524 mirna_lnc  |
| 28678 hsa-mir-30c-2 | AC007541.1 | 0.34569307 mirna_lnc  |
| 28679 hsa-mir-30c-2 | AC022272.1 | 0.388009542 mirna_lnc |
| 28680 hsa-mir-30c-2 | CATIP-AS2  | 0.306770771 mirna_lnc |
| 28681 hsa-mir-30c-2 | AP001271.1 | 0.322195634 mirna_lnc |
| 28682 hsa-mir-30c-2 | AC092111.2 | 0.321440159 mirna_lnc |
| 28683 hsa-mir-30c-2 | ANK3-DT    | 0.33977702 mirna_lnc  |
| 28684 hsa-mir-30c-2 | AC006946.2 | 0.433559939 mirna_lnc |
| 28685 hsa-mir-30c-2 | AC048341.1 | 0.365020977 mirna_lnc |
| 28686 hsa-mir-30c-2 | AC107464.3 | 0.362265092 mirna_lnc |
| 28687 hsa-mir-30c-2 | AL513534.2 | 0.332596849 mirna_lnc |
| 28688 hsa-mir-30c-2 | AC025219.1 | 0.341402523 mirna_lnc |
| 28689 hsa-mir-30c-2 | AL390195.1 | 0.322018185 mirna_lnc |
| 28690 hsa-mir-30c-2 | AC009812.3 | 0.335351114 mirna_lnc |
| 28691 hsa-mir-30c-2 | AC244090.1 | 0.329731944 mirna_lnc |
| 28692 hsa-mir-30c-2 | AC007390.2 | 0.310516925 mirna_lnc |
| 28693 hsa-mir-30c-2 | AC005865.1 | 0.356252693 mirna_lnc |
| 28694 hsa-mir-30c-2 | AP001021.1 | 0.316334237 mirna_lnc |
| 28695 hsa-mir-30c-2 | AC004908.3 | 0.334848074 mirna_lnc |
| 28696 hsa-mir-30c-2 | CATIP-AS1  | 0.301795286 mirna_lnc |
| 28697 hsa-mir-30c-2 | AC073869.3 | 0.34056242 mirna_lnc  |
| 28698 hsa-mir-30c-2 | AL355490.2 | 0.335677257 mirna_lnc |
| 28699 hsa-mir-30c-2 | AC079174.2 | 0.339264378 mirna_lnc |
| 28700 hsa-mir-30c-2 | ETV5-AS1   | 0.445489388 mirna_lnc |
| 28701 hsa-mir-30c-2 | AC107068.1 | 0.488139301 mirna_lnc |
| 28702 hsa-mir-30c-2 | AL731563.3 | 0.336077894 mirna_lnc |
| 28703 hsa-mir-30c-2 | AC072039.2 | 0.306688253 mirna_lnc |
| 28704 hsa-mir-30c-2 | AL050343.1 | 0.350251112 mirna_lnc |
| 28705 hsa-mir-30c-2 | AC096564.2 | 0.315015603 mirna_lnc |
| 28706 hsa-mir-30c-2 | FAR1-IT1   | 0.455355122 mirna_lnc |
| 28707 hsa-mir-30c-2 | AC010973.2 | 0.303556945 mirna_lnc |
| 28708 hsa-mir-30c-2 | AC125616.1 | 0.344723912 mirna_lnc |
| 28709 hsa-mir-30c-2 | AC078909.2 | 0.322833961 mirna_lnc |
| 28710 hsa-mir-30c-2 | AC008440.1 | 0.334752049 mirna_lnc |
| 28711 hsa-mir-30c-2 | AC084782.2 | 0.364653668 mirna_lnc |
| 28712 hsa-mir-30c-2 | AL118511.1 | 0.318621508 mirna_lnc |
| 28713 hsa-mir-30c-2 | AC005014.2 | 0.332666757 mirna_lnc |
| 28714 hsa-mir-30c-2 | AC131971.1 | 0.324217345 mirna_lnc |
| 28715 hsa-mir-30c-2 | AC079766.1 | 0.353596041 mirna_lnc |
| 28716 hsa-mir-30c-2 | AC046130.2 | 0.302069487 mirna_lnc |
| 28717 hsa-mir-30c-2 | AC009269.4 | 0.356543449 mirna_lnc |
| 28718 hsa-mir-30c-2 | AC003070.2 | 0.305749364 mirna_lnc |
| 28719 hsa-mir-30c-2 | LINC02062  | 0.32013276 mirna_lnc  |
| 28720 hsa-mir-30c-2 | AC005034.4 | 0.426716105 mirna_lnc |
| 28721 hsa-mir-30c-2 | AL731566.1 | 0.301302909 mirna_lnc |
| 28722 hsa-mir-30c-2 | AC104794.2 | 0.311611733 mirna_lnc |
| 28723 hsa-mir-30c-2 | AP006623.1 | 0.315153384 mirna_lnc |
| 28724 hsa-mir-30c-2 | AC098484.2 | 0.347850421 mirna_lnc |
| 28725 hsa-mir-30c-2 | AL359510.2 | 0.335066434 mirna_lnc |
| 28726 hsa-mir-30c-2 | STARD4-AS1 | 0.358368859 mirna_lnc |
| 28727 hsa-mir-30c-2 | AC022107.1 | 0.304896706 mirna_lnc |



|                     |            |                       |
|---------------------|------------|-----------------------|
| 28728 hsa-mir-30c-2 | AL031587.1 | 0.322682503 mirna_lnc |
| 28729 hsa-mir-30c-2 | NFYC-AS1   | 0.455186952 mirna_lnc |
| 28730 hsa-mir-30c-2 | LINC02097  | 0.41002338 mirna_lnc  |
| 28731 hsa-mir-30c-2 | AC017100.1 | 0.300625286 mirna_lnc |
| 28732 hsa-mir-30c-2 | AC004076.2 | 0.350503033 mirna_lnc |
| 28733 hsa-mir-30c-2 | AC098820.1 | 0.301316194 mirna_lnc |
| 28734 hsa-mir-30c-2 | AP001178.2 | 0.320950091 mirna_lnc |
| 28735 hsa-mir-30c-2 | AL662884.1 | 0.313353056 mirna_lnc |
| 28736 hsa-mir-30c-2 | AC011462.5 | 0.314361683 mirna_lnc |
| 28737 hsa-mir-30c-2 | AC108727.1 | 0.307401314 mirna_lnc |
| 28738 hsa-mir-30c-2 | AC018892.3 | 0.344534812 mirna_lnc |
| 28739 hsa-mir-30c-2 | AC004918.1 | 0.307849175 mirna_lnc |
| 28740 hsa-mir-30c-2 | AC104581.4 | 0.35354372 mirna_lnc  |
| 28741 hsa-mir-30c-2 | LINC00909  | 0.305735227 mirna_lnc |
| 28742 hsa-mir-30c-2 | AL139339.1 | 0.34693995 mirna_lnc  |
| 28743 hsa-mir-30c-2 | AL049838.1 | 0.51146581 mirna_lnc  |
| 28744 hsa-mir-30c-2 | PTOV1-AS1  | 0.395529215 mirna_lnc |
| 28745 hsa-mir-30c-2 | AC005034.3 | 0.302158824 mirna_lnc |
| 28746 hsa-mir-30c-2 | AC068397.1 | 0.305908482 mirna_lnc |
| 28747 hsa-mir-30c-2 | AL121917.2 | 0.300871645 mirna_lnc |
| 28748 hsa-mir-30c-2 | AC025178.1 | 0.306494458 mirna_lnc |
| 28749 hsa-mir-30c-2 | AC127540.1 | 0.33334218 mirna_lnc  |
| 28750 hsa-mir-30c-2 | AL450384.1 | 0.302687253 mirna_lnc |
| 28751 hsa-mir-30c-2 | AC008870.2 | 0.341528696 mirna_lnc |
| 28752 hsa-mir-30c-2 | AL161725.2 | 0.300181877 mirna_lnc |
| 28753 hsa-mir-30c-2 | ADNP-AS1   | 0.400742652 mirna_lnc |
| 28754 hsa-mir-30c-2 | ZBTB20-AS4 | 0.327847632 mirna_lnc |
| 28755 hsa-mir-30c-2 | AC005034.2 | 0.311968097 mirna_lnc |
| 28756 hsa-mir-30c-2 | AC103739.1 | 0.30206946 mirna_lnc  |
| 28757 hsa-mir-30c-2 | AL137003.2 | 0.321975618 mirna_lnc |
| 28758 hsa-mir-30c-2 | AC108451.1 | 0.31770116 mirna_lnc  |
| 28759 hsa-mir-30c-2 | AC093788.1 | 0.406614946 mirna_lnc |
| 28760 hsa-mir-30c-2 | AC145422.1 | 0.353817133 mirna_lnc |
| 28761 hsa-mir-30c-2 | AC108063.1 | 0.403808732 mirna_lnc |
| 28762 hsa-mir-30c-2 | AC032011.1 | 0.347722213 mirna_lnc |
| 28763 hsa-mir-30c-2 | AC107464.1 | 0.384511581 mirna_lnc |
| 28764 hsa-mir-30c-2 | AC139792.2 | 0.312562345 mirna_lnc |
| 28765 hsa-mir-30c-2 | AC005730.3 | 0.305289182 mirna_lnc |
| 28766 hsa-mir-30c-2 | AC010999.1 | 0.421514086 mirna_lnc |
| 28767 hsa-mir-30c-2 | AC009754.1 | 0.325455859 mirna_lnc |
| 28768 hsa-mir-30c-2 | AC007038.2 | 0.346881442 mirna_lnc |
| 28769 hsa-mir-30c-2 | AC124069.1 | 0.301613232 mirna_lnc |
| 28770 hsa-mir-30c-2 | AL358115.1 | 0.331801082 mirna_lnc |
| 28771 hsa-mir-30c-2 | AC055855.1 | 0.326884617 mirna_lnc |
| 28772 hsa-mir-30c-2 | AC060766.6 | 0.356171554 mirna_lnc |
| 28773 hsa-mir-30c-2 | AL049646.1 | 0.319280177 mirna_lnc |
| 28774 hsa-mir-30c-2 | AC092718.5 | 0.328375244 mirna_lnc |
| 28775 hsa-mir-30c-2 | AC006017.1 | 0.33316404 mirna_lnc  |
| 28776 hsa-mir-30c-2 | AC097534.1 | 0.348045303 mirna_lnc |
| 28777 hsa-mir-30c-2 | AC022893.3 | 0.375030245 mirna_lnc |
| 28778 hsa-mir-30c-2 | AL512343.2 | 0.30881927 mirna_lnc  |
| 28779 hsa-mir-30c-2 | AL596202.1 | 0.326952935 mirna_lnc |
| 28780 hsa-mir-30c-2 | LAMC1-AS1  | 0.341480912 mirna_lnc |
| 28781 hsa-mir-30c-2 | AC011239.1 | 0.304107524 mirna_lnc |

|                     |            |                       |
|---------------------|------------|-----------------------|
| 28782 hsa-mir-30c-2 | AC084824.4 | 0.452685572 mirna_lnc |
| 28783 hsa-mir-30c-2 | AC092839.2 | 0.348025019 mirna_lnc |
| 28784 hsa-mir-30c-2 | AC006213.6 | 0.358572237 mirna_lnc |
| 28785 hsa-mir-30c-2 | AC006487.1 | 0.324221663 mirna_lnc |
| 28786 hsa-mir-30c-2 | AL513477.2 | 0.349097146 mirna_lnc |
| 28787 hsa-mir-30c-2 | AL359878.1 | 0.302203968 mirna_lnc |
| 28788 hsa-mir-30c-2 | AC114763.2 | 0.305937615 mirna_lnc |
| 28789 hsa-mir-30c-2 | AC009812.4 | 0.337343179 mirna_lnc |
| 28790 hsa-mir-30c-2 | AC022001.3 | 0.319278722 mirna_lnc |
| 28791 hsa-mir-30c-2 | AC108704.1 | 0.345282029 mirna_lnc |
| 28792 hsa-mir-29c   | ZNF710-AS1 | 0.568114117 mirna_lnc |
| 28793 hsa-mir-29c   | AC116407.1 | 0.453308071 mirna_lnc |
| 28794 hsa-mir-29c   | AC004836.1 | 0.482435212 mirna_lnc |
| 28795 hsa-mir-29c   | C9orf147   | 0.544335308 mirna_lnc |
| 28796 hsa-mir-29c   | AC012409.3 | 0.595992684 mirna_lnc |
| 28797 hsa-mir-29c   | AC025271.4 | 0.494801743 mirna_lnc |
| 28798 hsa-mir-29c   | AC005920.4 | 0.53889732 mirna_lnc  |
| 28799 hsa-mir-29c   | AC123912.4 | 0.461216018 mirna_lnc |
| 28800 hsa-mir-29c   | AP001148.1 | 0.588554534 mirna_lnc |
| 28801 hsa-mir-29c   | AC015908.3 | 0.602138573 mirna_lnc |
| 28802 hsa-mir-29c   | BX284668.2 | 0.443610431 mirna_lnc |
| 28803 hsa-mir-29c   | AL158847.1 | 0.536886748 mirna_lnc |
| 28804 hsa-mir-29c   | AC024337.2 | 0.506023492 mirna_lnc |
| 28805 hsa-mir-29c   | AL158163.2 | 0.609551548 mirna_lnc |
| 28806 hsa-mir-29c   | LINC00940  | 0.60609712 mirna_lnc  |
| 28807 hsa-mir-29c   | AC093583.1 | 0.467096725 mirna_lnc |
| 28808 hsa-mir-29c   | AC239798.2 | 0.520767313 mirna_lnc |
| 28809 hsa-mir-29c   | AL157392.2 | 0.37172945 mirna_lnc  |
| 28810 hsa-mir-29c   | AP001528.3 | 0.496768754 mirna_lnc |
| 28811 hsa-mir-29c   | AC012409.5 | 0.468816831 mirna_lnc |
| 28812 hsa-mir-29c   | AP001528.2 | 0.564990981 mirna_lnc |
| 28813 hsa-mir-29c   | AC063919.1 | 0.363010698 mirna_lnc |
| 28814 hsa-mir-29c   | AC093797.1 | 0.468485216 mirna_lnc |
| 28815 hsa-mir-29c   | AC016251.1 | 0.511583654 mirna_lnc |
| 28816 hsa-mir-29c   | AC108472.1 | 0.474033436 mirna_lnc |
| 28817 hsa-mir-29c   | AC124312.3 | 0.348614413 mirna_lnc |
| 28818 hsa-mir-29c   | AC091563.1 | 0.478173738 mirna_lnc |
| 28819 hsa-mir-29c   | NGF-AS1    | 0.498009011 mirna_lnc |
| 28820 hsa-mir-29c   | AC244453.3 | 0.576176456 mirna_lnc |
| 28821 hsa-mir-29c   | LINC02489  | 0.403238118 mirna_lnc |
| 28822 hsa-mir-29c   | CADM3-AS1  | 0.322262902 mirna_lnc |
| 28823 hsa-mir-29c   | AL138847.2 | 0.514675493 mirna_lnc |
| 28824 hsa-mir-29c   | AL158206.1 | 0.413798618 mirna_lnc |
| 28825 hsa-mir-29c   | AC139749.1 | 0.345479523 mirna_lnc |
| 28826 hsa-mir-29c   | AP003117.1 | 0.386550674 mirna_lnc |
| 28827 hsa-mir-29c   | AL158163.1 | 0.530193662 mirna_lnc |
| 28828 hsa-mir-29c   | AP001972.5 | 0.328515798 mirna_lnc |
| 28829 hsa-mir-29c   | AC021016.2 | 0.54700606 mirna_lnc  |
| 28830 hsa-mir-29c   | AC005725.1 | 0.320317748 mirna_lnc |
| 28831 hsa-mir-29c   | AC105074.1 | 0.306239386 mirna_lnc |
| 28832 hsa-mir-29c   | AC004982.1 | 0.553697626 mirna_lnc |
| 28833 hsa-mir-29c   | AL512328.1 | 0.468570904 mirna_lnc |
| 28834 hsa-mir-29c   | AC073862.3 | 0.414496345 mirna_lnc |
| 28835 hsa-mir-29c   | AC091057.3 | 0.471632676 mirna_lnc |

|                   |            |                       |
|-------------------|------------|-----------------------|
| 28836 hsa-mir-29c | AC079061.1 | 0.466131599 mirna_lnc |
| 28837 hsa-mir-29c | LINC02447  | 0.386477545 mirna_lnc |
| 28838 hsa-mir-29c | AP001094.2 | 0.392211014 mirna_lnc |
| 28839 hsa-mir-29c | AC091544.5 | 0.438335916 mirna_lnc |
| 28840 hsa-mir-29c | AC013726.1 | 0.426300428 mirna_lnc |
| 28841 hsa-mir-29c | AL031429.2 | 0.594244154 mirna_lnc |
| 28842 hsa-mir-29c | AC022558.2 | 0.303801652 mirna_lnc |
| 28843 hsa-mir-29c | AL355073.1 | 0.461743041 mirna_lnc |
| 28844 hsa-mir-29c | AC021766.1 | 0.405962989 mirna_lnc |
| 28845 hsa-mir-29c | AL133355.1 | 0.439220328 mirna_lnc |
| 28846 hsa-mir-29c | AC025279.1 | 0.491652676 mirna_lnc |
| 28847 hsa-mir-29c | IDH2-DT    | 0.477564708 mirna_lnc |
| 28848 hsa-mir-29c | AC246680.1 | 0.425029671 mirna_lnc |
| 28849 hsa-mir-29c | LINC01985  | 0.393786464 mirna_lnc |
| 28850 hsa-mir-29c | LINC02352  | 0.415906448 mirna_lnc |
| 28851 hsa-mir-29c | AP005717.1 | 0.414854672 mirna_lnc |
| 28852 hsa-mir-29c | AC023794.6 | 0.443250957 mirna_lnc |
| 28853 hsa-mir-29c | AC114810.1 | 0.336146523 mirna_lnc |
| 28854 hsa-mir-29c | AL136164.3 | 0.310258573 mirna_lnc |
| 28855 hsa-mir-29c | AL109936.2 | 0.428693632 mirna_lnc |
| 28856 hsa-mir-29c | AC129492.3 | 0.537912365 mirna_lnc |
| 28857 hsa-mir-29c | AC012409.1 | 0.581756925 mirna_lnc |
| 28858 hsa-mir-29c | TRG-AS1    | 0.667347627 mirna_lnc |
| 28859 hsa-mir-29c | RPL34-AS1  | 0.352824702 mirna_lnc |
| 28860 hsa-mir-29c | AC007637.1 | 0.474374908 mirna_lnc |
| 28861 hsa-mir-29c | AL158212.1 | 0.360152365 mirna_lnc |
| 28862 hsa-mir-29c | AC244453.1 | 0.535920208 mirna_lnc |
| 28863 hsa-mir-29c | MAGI1-AS1  | 0.403826357 mirna_lnc |
| 28864 hsa-mir-29c | SEMA3B-AS1 | 0.577187437 mirna_lnc |
| 28865 hsa-mir-29c | LINC00365  | 0.509611619 mirna_lnc |
| 28866 hsa-mir-29c | HCG21      | 0.446544324 mirna_lnc |
| 28867 hsa-mir-29c | AC132154.1 | 0.559693242 mirna_lnc |
| 28868 hsa-mir-29c | NCOA7-AS1  | 0.616902029 mirna_lnc |
| 28869 hsa-mir-29c | AC008669.1 | 0.309746765 mirna_lnc |
| 28870 hsa-mir-29c | LINC00261  | 0.380341046 mirna_lnc |
| 28871 hsa-mir-29c | ENOX1-AS1  | 0.307755773 mirna_lnc |
| 28872 hsa-mir-29c | AC024075.1 | 0.33293815 mirna_lnc  |
| 28873 hsa-mir-29c | LINC02435  | 0.339681478 mirna_lnc |
| 28874 hsa-mir-29c | PCAT18     | 0.587942786 mirna_lnc |
| 28875 hsa-mir-29c | AP000866.2 | 0.337280889 mirna_lnc |
| 28876 hsa-mir-29c | AL035701.1 | 0.365552308 mirna_lnc |
| 28877 hsa-mir-29c | AC118344.2 | 0.315062035 mirna_lnc |
| 28878 hsa-mir-29c | AC138819.1 | 0.423564733 mirna_lnc |
| 28879 hsa-mir-29c | AC018926.1 | 0.455557364 mirna_lnc |
| 28880 hsa-mir-29c | SH3BP5-AS1 | 0.327246666 mirna_lnc |
| 28881 hsa-mir-29c | ELN-AS1    | 0.317041357 mirna_lnc |
| 28882 hsa-mir-29c | AL031587.5 | 0.387775925 mirna_lnc |
| 28883 hsa-mir-29c | AC244453.2 | 0.499652751 mirna_lnc |
| 28884 hsa-mir-29c | AL031846.2 | 0.336355389 mirna_lnc |
| 28885 hsa-mir-29c | FOXP1-AS1  | 0.371949604 mirna_lnc |
| 28886 hsa-mir-29c | AC024075.2 | 0.300974814 mirna_lnc |
| 28887 hsa-mir-29c | AC105345.1 | 0.315479509 mirna_lnc |
| 28888 hsa-mir-29c | AC037459.2 | 0.574148959 mirna_lnc |
| 28889 hsa-mir-29c | AC005495.1 | 0.323775999 mirna_lnc |

|                   |             |                       |
|-------------------|-------------|-----------------------|
| 28890 hsa-mir-29c | AL020997.3  | 0.449359204 mirna_lnc |
| 28891 hsa-mir-29c | AP003355.2  | 0.48926645 mirna_lnc  |
| 28892 hsa-mir-29c | AC012557.1  | 0.341628082 mirna_lnc |
| 28893 hsa-mir-29c | AC025917.1  | 0.435838256 mirna_lnc |
| 28894 hsa-mir-29c | AC009119.3  | 0.416925089 mirna_lnc |
| 28895 hsa-mir-29c | AC098869.2  | 0.371900059 mirna_lnc |
| 28896 hsa-mir-29c | AC021491.2  | 0.449912818 mirna_lnc |
| 28897 hsa-mir-29c | AC139887.4  | 0.300332868 mirna_lnc |
| 28898 hsa-mir-29c | AP003486.1  | 0.383665962 mirna_lnc |
| 28899 hsa-mir-29c | AC021205.3  | 0.300874904 mirna_lnc |
| 28900 hsa-mir-29c | AC006942.1  | 0.345186482 mirna_lnc |
| 28901 hsa-mir-29c | AL731557.1  | 0.50751235 mirna_lnc  |
| 28902 hsa-mir-29c | AL391834.2  | 0.314526581 mirna_lnc |
| 28903 hsa-mir-29c | AL138930.1  | 0.553751529 mirna_lnc |
| 28904 hsa-mir-29c | AC093607.1  | 0.304499172 mirna_lnc |
| 28905 hsa-mir-29c | AC012181.1  | 0.495071699 mirna_lnc |
| 28906 hsa-mir-29c | AC111182.1  | 0.473829596 mirna_lnc |
| 28907 hsa-mir-29c | AL512383.1  | 0.316060869 mirna_lnc |
| 28908 hsa-mir-29c | AC010776.2  | 0.393387071 mirna_lnc |
| 28909 hsa-mir-29c | AC024075.3  | 0.347687728 mirna_lnc |
| 28910 hsa-mir-29c | AC022173.1  | 0.323169557 mirna_lnc |
| 28911 hsa-mir-29c | AC012181.2  | 0.528520719 mirna_lnc |
| 28912 hsa-mir-29c | AL390208.1  | 0.312997892 mirna_lnc |
| 28913 hsa-mir-29c | AC112236.2  | 0.420975172 mirna_lnc |
| 28914 hsa-mir-29c | EPB41L4A-DT | 0.332586679 mirna_lnc |
| 28915 hsa-mir-29c | AC018926.3  | 0.57949964 mirna_lnc  |
| 28916 hsa-mir-29c | AC012409.2  | 0.319904926 mirna_lnc |
| 28917 hsa-mir-29c | AC079305.3  | 0.603613669 mirna_lnc |
| 28918 hsa-mir-29c | AC104825.1  | 0.323920173 mirna_lnc |
| 28919 hsa-mir-29c | AL357033.4  | 0.435544494 mirna_lnc |
| 28920 hsa-mir-29c | AC114980.1  | 0.398393928 mirna_lnc |
| 28921 hsa-mir-29c | AC008676.1  | 0.428154678 mirna_lnc |
| 28922 hsa-mir-29c | AC009090.3  | 0.30359963 mirna_lnc  |
| 28923 hsa-mir-29c | AL031726.1  | 0.322329011 mirna_lnc |
| 28924 hsa-mir-29c | ZRANB2-AS1  | 0.397903993 mirna_lnc |
| 28925 hsa-mir-29c | AL357033.3  | 0.341728021 mirna_lnc |
| 28926 hsa-mir-29c | AC116337.3  | 0.322636326 mirna_lnc |
| 28927 hsa-mir-29c | AC010226.1  | 0.45375372 mirna_lnc  |
| 28928 hsa-mir-29c | AC135050.6  | 0.308316719 mirna_lnc |
| 28929 hsa-mir-29c | AL135960.1  | 0.337379464 mirna_lnc |
| 28930 hsa-mir-29c | C9orf106    | 0.428362456 mirna_lnc |
| 28931 hsa-mir-29c | AL356273.3  | 0.310851429 mirna_lnc |
| 28932 hsa-mir-29c | LINC01954   | 0.361113741 mirna_lnc |
| 28933 hsa-mir-29c | AC020978.4  | 0.318098006 mirna_lnc |
| 28934 hsa-mir-29c | AC090152.1  | 0.404709108 mirna_lnc |
| 28935 hsa-mir-29c | AP003721.4  | 0.557493381 mirna_lnc |
| 28936 hsa-mir-29c | AC009806.1  | 0.342324081 mirna_lnc |
| 28937 hsa-mir-29c | AL596325.2  | 0.374299452 mirna_lnc |
| 28938 hsa-mir-29c | AC007598.3  | 0.374862849 mirna_lnc |
| 28939 hsa-mir-29c | AC006960.3  | 0.300654152 mirna_lnc |
| 28940 hsa-mir-29c | AC231657.1  | 0.306070063 mirna_lnc |
| 28941 hsa-mir-29c | ERVE-1      | 0.51111164 mirna_lnc  |
| 28942 hsa-mir-29c | AC064807.2  | 0.489889453 mirna_lnc |
| 28943 hsa-mir-29c | AL590226.1  | 0.368135425 mirna_lnc |

|                   |              |                       |
|-------------------|--------------|-----------------------|
| 28944 hsa-mir-29c | AC084036.1   | 0.389415524 mirna_lnc |
| 28945 hsa-mir-29c | AC022898.2   | 0.394907624 mirna_lnc |
| 28946 hsa-mir-29c | AC091588.1   | 0.361286782 mirna_lnc |
| 28947 hsa-mir-29c | AC139768.2   | 0.322467162 mirna_lnc |
| 28948 hsa-mir-29c | AC127521.1   | 0.331521706 mirna_lnc |
| 28949 hsa-mir-29c | AC036176.1   | 0.323140176 mirna_lnc |
| 28950 hsa-mir-29c | AC096733.2   | 0.382954573 mirna_lnc |
| 28951 hsa-mir-29c | AL031847.1   | 0.319183489 mirna_lnc |
| 28952 hsa-mir-29c | AC009090.1   | 0.379993167 mirna_lnc |
| 28953 hsa-mir-29c | AC074032.1   | 0.362763507 mirna_lnc |
| 28954 hsa-mir-29c | AC124312.2   | 0.445476448 mirna_lnc |
| 28955 hsa-mir-29c | AC008770.3   | 0.308982251 mirna_lnc |
| 28956 hsa-mir-29c | AC008731.1   | 0.324807506 mirna_lnc |
| 28957 hsa-mir-29c | LINC02363    | 0.311962985 mirna_lnc |
| 28958 hsa-mir-29c | AC007036.2   | 0.313872394 mirna_lnc |
| 28959 hsa-mir-29c | AL034347.1   | 0.4226719 mirna_lnc   |
| 28960 hsa-mir-29c | SLC25A21-AS1 | 0.341985873 mirna_lnc |
| 28961 hsa-mir-29c | AC010525.1   | 0.496558121 mirna_lnc |
| 28962 hsa-mir-29c | AL121895.2   | 0.384230407 mirna_lnc |
| 28963 hsa-mir-29c | AL391121.1   | 0.361107825 mirna_lnc |
| 28964 hsa-mir-29c | AC078906.1   | 0.426750179 mirna_lnc |
| 28965 hsa-mir-29c | LINC02256    | 0.31505507 mirna_lnc  |
| 28966 hsa-mir-29c | AGBL5-IT1    | 0.316277069 mirna_lnc |
| 28967 hsa-mir-29c | POU6F2-AS1   | 0.40024568 mirna_lnc  |
| 28968 hsa-mir-29c | AL122023.1   | 0.320807388 mirna_lnc |
| 28969 hsa-mir-29c | FP671120.5   | 0.3400247 mirna_lnc   |
| 28970 hsa-mir-29c | AC007490.1   | 0.348249298 mirna_lnc |
| 28971 hsa-mir-29c | AC087286.2   | 0.320753969 mirna_lnc |
| 28972 hsa-mir-29c | AL355073.2   | 0.452649483 mirna_lnc |
| 28973 hsa-mir-29c | AL162511.1   | 0.488520634 mirna_lnc |
| 28974 hsa-mir-29c | AC107952.2   | 0.317301226 mirna_lnc |
| 28975 hsa-mir-29c | AC135507.1   | 0.377834704 mirna_lnc |
| 28976 hsa-mir-29c | LINC01504    | 0.452073105 mirna_lnc |
| 28977 hsa-mir-29c | AC009831.3   | 0.333044702 mirna_lnc |
| 28978 hsa-mir-29c | AC108861.1   | 0.527204201 mirna_lnc |
| 28979 hsa-mir-29c | AP001094.3   | 0.452984387 mirna_lnc |
| 28980 hsa-mir-29c | AL512791.1   | 0.309181347 mirna_lnc |
| 28981 hsa-mir-29c | VAV3-AS1     | 0.430103532 mirna_lnc |
| 28982 hsa-mir-29c | LINC01422    | 0.308300356 mirna_lnc |
| 28983 hsa-mir-29c | AC092620.1   | 0.377628436 mirna_lnc |
| 28984 hsa-mir-29c | AC026202.2   | 0.382231156 mirna_lnc |
| 28985 hsa-mir-29c | AC093278.2   | 0.398442157 mirna_lnc |
| 28986 hsa-mir-29c | AC099343.2   | 0.319530879 mirna_lnc |
| 28987 hsa-mir-29c | UMODL1-AS1   | 0.303316735 mirna_lnc |
| 28988 hsa-mir-29c | LINC02640    | 0.41214808 mirna_lnc  |
| 28989 hsa-mir-29c | AC005796.1   | 0.305772081 mirna_lnc |
| 28990 hsa-mir-29c | AC084262.1   | 0.461997859 mirna_lnc |
| 28991 hsa-mir-29c | AL392023.2   | 0.31765885 mirna_lnc  |
| 28992 hsa-mir-29c | AL513008.1   | 0.34860527 mirna_lnc  |
| 28993 hsa-mir-29c | AL355076.2   | 0.331775396 mirna_lnc |
| 28994 hsa-mir-29c | AC138512.1   | 0.452184445 mirna_lnc |
| 28995 hsa-mir-29c | LINC01857    | 0.355815483 mirna_lnc |
| 28996 hsa-mir-29c | FUT8-AS1     | 0.343297228 mirna_lnc |
| 28997 hsa-mir-29c | AL138995.1   | 0.307018907 mirna_lnc |

|                   |              |                        |
|-------------------|--------------|------------------------|
| 28998 hsa-mir-29c | AC097637. 2  | 0. 326961991 mirna_lnc |
| 28999 hsa-mir-29c | LIMD1-AS1    | 0. 440221258 mirna_lnc |
| 29000 hsa-mir-29c | AL356124. 2  | 0. 332820284 mirna_lnc |
| 29001 hsa-mir-29c | AC040160. 2  | 0. 319638883 mirna_lnc |
| 29002 hsa-mir-29c | AP001094. 1  | 0. 464112141 mirna_lnc |
| 29003 hsa-mir-29c | AC026474. 1  | 0. 302773851 mirna_lnc |
| 29004 hsa-mir-29c | AL096816. 1  | 0. 303325811 mirna_lnc |
| 29005 hsa-mir-29c | AC000124. 1  | 0. 434232761 mirna_lnc |
| 29006 hsa-mir-29c | AC234775. 3  | 0. 302124822 mirna_lnc |
| 29007 hsa-mir-29c | AL049835. 1  | 0. 310502685 mirna_lnc |
| 29008 hsa-mir-29c | AC026367. 2  | 0. 319174576 mirna_lnc |
| 29009 hsa-mir-29c | AL354872. 2  | 0. 374210711 mirna_lnc |
| 29010 hsa-mir-29c | AC011491. 3  | 0. 321820889 mirna_lnc |
| 29011 hsa-mir-29c | AC010998. 2  | 0. 335476777 mirna_lnc |
| 29012 hsa-mir-29c | AC092068. 3  | 0. 384105637 mirna_lnc |
| 29013 hsa-mir-29c | AC135586. 2  | 0. 406184559 mirna_lnc |
| 29014 hsa-mir-29c | AC120498. 2  | 0. 503211585 mirna_lnc |
| 29015 hsa-mir-29c | AC005838. 2  | 0. 307460055 mirna_lnc |
| 29016 hsa-mir-29c | AC092068. 2  | 0. 381177155 mirna_lnc |
| 29017 hsa-mir-29c | AL365361. 1  | 0. 454291665 mirna_lnc |
| 29018 hsa-mir-29c | AC008035. 1  | 0. 302201897 mirna_lnc |
| 29019 hsa-mir-29c | RABGAP1L-IT1 | 0. 315492319 mirna_lnc |
| 29020 hsa-mir-29c | AC135776. 1  | 0. 339259906 mirna_lnc |
| 29021 hsa-mir-29c | AC009093. 6  | 0. 320483161 mirna_lnc |
| 29022 hsa-mir-29c | AL023653. 1  | 0. 34563903 mirna_lnc  |
| 29023 hsa-mir-29c | AC009495. 3  | 0. 310578044 mirna_lnc |
| 29024 hsa-mir-29c | AL031733. 2  | 0. 374100417 mirna_lnc |
| 29025 hsa-mir-29c | ANKRD44-IT1  | 0. 479778291 mirna_lnc |
| 29026 hsa-mir-29c | HMBX1-IT1    | 0. 301179997 mirna_lnc |
| 29027 hsa-mir-29c | TMEM92-AS1   | 0. 312957139 mirna_lnc |
| 29028 hsa-mir-29c | AL136368. 1  | 0. 303619197 mirna_lnc |
| 29029 hsa-mir-29c | AC006369. 1  | 0. 338236947 mirna_lnc |
| 29030 hsa-mir-29c | AC021491. 4  | 0. 408570029 mirna_lnc |
| 29031 hsa-mir-29c | AC009108. 3  | 0. 33073276 mirna_lnc  |
| 29032 hsa-mir-29c | AC136424. 2  | 0. 311421876 mirna_lnc |
| 29033 hsa-mir-29c | AC012557. 2  | 0. 311409823 mirna_lnc |
| 29034 hsa-mir-29c | AC104699. 1  | 0. 430767738 mirna_lnc |
| 29035 hsa-mir-29c | AC006441. 1  | 0. 312599783 mirna_lnc |
| 29036 hsa-mir-29c | AL662860. 1  | 0. 344181831 mirna_lnc |
| 29037 hsa-mir-29c | AC008080. 4  | 0. 404057554 mirna_lnc |
| 29038 hsa-mir-29c | AC092652. 2  | 0. 436042516 mirna_lnc |
| 29039 hsa-mir-29c | AC244090. 1  | 0. 313911308 mirna_lnc |
| 29040 hsa-mir-29c | CATIP-AS1    | 0. 318771364 mirna_lnc |
| 29041 hsa-mir-29c | AC115102. 1  | 0. 344004028 mirna_lnc |
| 29042 hsa-mir-29c | LINC02422    | 0. 390045646 mirna_lnc |
| 29043 hsa-mir-29c | AC078962. 1  | 0. 320307483 mirna_lnc |
| 29044 hsa-mir-29c | AC008569. 2  | 0. 342329487 mirna_lnc |
| 29045 hsa-mir-29c | AC104024. 1  | 0. 333703054 mirna_lnc |
| 29046 hsa-mir-29c | FAR1-IT1     | 0. 415523724 mirna_lnc |
| 29047 hsa-mir-29c | AC093010. 2  | 0. 423100825 mirna_lnc |
| 29048 hsa-mir-29c | LINC02245    | 0. 439985322 mirna_lnc |
| 29049 hsa-mir-29c | AL136320. 1  | 0. 336851312 mirna_lnc |
| 29050 hsa-mir-29c | AC246787. 2  | 0. 475591623 mirna_lnc |
| 29051 hsa-mir-29c | LINC01154    | 0. 340236125 mirna_lnc |

|                   |             |                       |
|-------------------|-------------|-----------------------|
| 29052 hsa-mir-29c | AC010609.1  | 0.31202765 mirna_lnc  |
| 29053 hsa-mir-29c | AL137779.1  | 0.306615752 mirna_lnc |
| 29054 hsa-mir-29c | BFSP2-AS1   | 0.353496043 mirna_lnc |
| 29055 hsa-mir-29c | LINC01055   | 0.403194457 mirna_lnc |
| 29056 hsa-mir-29c | AC003957.1  | 0.31186243 mirna_lnc  |
| 29057 hsa-mir-29c | AL049838.1  | 0.520077604 mirna_lnc |
| 29058 hsa-mir-29c | AC007342.1  | 0.311872006 mirna_lnc |
| 29059 hsa-mir-29c | ZBTB20-AS4  | 0.32420598 mirna_lnc  |
| 29060 hsa-mir-29c | AL133467.1  | 0.381954624 mirna_lnc |
| 29061 hsa-mir-29c | AC021188.1  | 0.301031631 mirna_lnc |
| 29062 hsa-mir-29c | AL359962.1  | 0.346337768 mirna_lnc |
| 29063 hsa-mir-29c | AC008982.2  | 0.337070457 mirna_lnc |
| 29064 hsa-mir-29c | LINC00582   | 0.336270275 mirna_lnc |
| 29065 hsa-mir-29c | AC119396.2  | 0.377301965 mirna_lnc |
| 29066 hsa-mir-29c | AC026748.1  | 0.359746586 mirna_lnc |
| 29067 hsa-mir-29c | AC092118.1  | 0.307542061 mirna_lnc |
| 29068 hsa-mir-29c | AC012645.3  | 0.373856113 mirna_lnc |
| 29069 hsa-mir-29c | LINC00528   | 0.326689166 mirna_lnc |
| 29070 hsa-mir-574 | LINC01096   | 0.367411609 mirna_lnc |
| 29071 hsa-mir-574 | AC109347.2  | 0.367602572 mirna_lnc |
| 29072 hsa-mir-574 | AC024230.1  | 0.351659339 mirna_lnc |
| 29073 hsa-mir-574 | EMC1-AS1    | 0.307457123 mirna_lnc |
| 29074 hsa-mir-574 | LINC02026   | 0.320304715 mirna_lnc |
| 29075 hsa-mir-574 | SEPSECS-AS1 | 0.308697476 mirna_lnc |
| 29076 hsa-mir-574 | AC091965.4  | 0.320107104 mirna_lnc |
| 29077 hsa-mir-574 | GIHCG       | 0.300690608 mirna_lnc |
| 29078 hsa-mir-574 | AC007786.2  | 0.401015375 mirna_lnc |
| 29079 hsa-mir-574 | AC026801.2  | 0.362466303 mirna_lnc |
| 29080 hsa-mir-574 | LINC00449   | 0.319674887 mirna_lnc |
| 29081 hsa-mir-1-2 | AC119424.1  | 0.436504043 mirna_lnc |
| 29082 hsa-mir-1-2 | AC004836.1  | 0.385531817 mirna_lnc |
| 29083 hsa-mir-1-2 | AC024337.2  | 0.462448994 mirna_lnc |
| 29084 hsa-mir-1-2 | AP001528.3  | 0.574590046 mirna_lnc |
| 29085 hsa-mir-1-2 | AP001528.2  | 0.461994384 mirna_lnc |
| 29086 hsa-mir-1-2 | AC124312.3  | 0.520383309 mirna_lnc |
| 29087 hsa-mir-1-2 | NCAM1-AS1   | 0.337598429 mirna_lnc |
| 29088 hsa-mir-1-2 | CADM3-AS1   | 0.611763452 mirna_lnc |
| 29089 hsa-mir-1-2 | AP003117.1  | 0.301262618 mirna_lnc |
| 29090 hsa-mir-1-2 | AC100830.1  | 0.527593482 mirna_lnc |
| 29091 hsa-mir-1-2 | AC053503.6  | 0.836501205 mirna_lnc |
| 29092 hsa-mir-1-2 | AC073862.3  | 0.336982384 mirna_lnc |
| 29093 hsa-mir-1-2 | AC053503.4  | 0.833326853 mirna_lnc |
| 29094 hsa-mir-1-2 | AC012085.2  | 0.356856566 mirna_lnc |
| 29095 hsa-mir-1-2 | AP001094.2  | 0.311991388 mirna_lnc |
| 29096 hsa-mir-1-2 | AL132642.1  | 0.647144872 mirna_lnc |
| 29097 hsa-mir-1-2 | AC007193.2  | 0.379762027 mirna_lnc |
| 29098 hsa-mir-1-2 | LINC01985   | 0.370298466 mirna_lnc |
| 29099 hsa-mir-1-2 | AL158212.3  | 0.412368151 mirna_lnc |
| 29100 hsa-mir-1-2 | AL023973.1  | 0.33425092 mirna_lnc  |
| 29101 hsa-mir-1-2 | LINC02185   | 0.354447649 mirna_lnc |
| 29102 hsa-mir-1-2 | AC005180.2  | 0.730103337 mirna_lnc |
| 29103 hsa-mir-1-2 | AC005225.4  | 0.487469239 mirna_lnc |
| 29104 hsa-mir-1-2 | AC007637.1  | 0.304988326 mirna_lnc |
| 29105 hsa-mir-1-2 | AC011504.1  | 0.476527477 mirna_lnc |

|                   |              |                       |
|-------------------|--------------|-----------------------|
| 29106 hsa-mir-1-2 | AC008669.1   | 0.44846082 mirna_lnc  |
| 29107 hsa-mir-1-2 | AF001548.3   | 0.678244426 mirna_lnc |
| 29108 hsa-mir-1-2 | AC024075.1   | 0.3425266 mirna_lnc   |
| 29109 hsa-mir-1-2 | LINC02593    | 0.338391617 mirna_lnc |
| 29110 hsa-mir-1-2 | NKAIN3-IT1   | 0.646694684 mirna_lnc |
| 29111 hsa-mir-1-2 | ELN-AS1      | 0.308340819 mirna_lnc |
| 29112 hsa-mir-1-2 | LINC01354    | 0.45047327 mirna_lnc  |
| 29113 hsa-mir-1-2 | AC135012.3   | 0.731566444 mirna_lnc |
| 29114 hsa-mir-1-2 | AL157996.1   | 0.564984154 mirna_lnc |
| 29115 hsa-mir-1-2 | PWAR5        | 0.578924419 mirna_lnc |
| 29116 hsa-mir-1-2 | AC135178.1   | 0.66054629 mirna_lnc  |
| 29117 hsa-mir-1-2 | AP003486.1   | 0.381444741 mirna_lnc |
| 29118 hsa-mir-1-2 | AC004637.1   | 0.615918635 mirna_lnc |
| 29119 hsa-mir-1-2 | AC091825.1   | 0.35534055 mirna_lnc  |
| 29120 hsa-mir-1-2 | GSN-AS1      | 0.416413351 mirna_lnc |
| 29121 hsa-mir-1-2 | AC024075.3   | 0.309563563 mirna_lnc |
| 29122 hsa-mir-1-2 | AC011472.4   | 0.507799775 mirna_lnc |
| 29123 hsa-mir-1-2 | AP001107.5   | 0.397533237 mirna_lnc |
| 29124 hsa-mir-1-2 | AC022893.1   | 0.381298545 mirna_lnc |
| 29125 hsa-mir-1-2 | AC102945.2   | 0.605191876 mirna_lnc |
| 29126 hsa-mir-1-2 | AC009102.2   | 0.489160198 mirna_lnc |
| 29127 hsa-mir-1-2 | AC007671.1   | 0.579160973 mirna_lnc |
| 29128 hsa-mir-1-2 | AC104825.1   | 0.304005388 mirna_lnc |
| 29129 hsa-mir-1-2 | AC130650.1   | 0.395599373 mirna_lnc |
| 29130 hsa-mir-1-2 | AC104117.3   | 0.395722851 mirna_lnc |
| 29131 hsa-mir-1-2 | AP001486.2   | 0.402353012 mirna_lnc |
| 29132 hsa-mir-1-2 | AC008764.2   | 0.354791205 mirna_lnc |
| 29133 hsa-mir-1-2 | AL135960.1   | 0.371274257 mirna_lnc |
| 29134 hsa-mir-1-2 | AC009806.1   | 0.47107983 mirna_lnc  |
| 29135 hsa-mir-1-2 | AF001548.1   | 0.821052374 mirna_lnc |
| 29136 hsa-mir-1-2 | PRICKLE2-AS3 | 0.33757468 mirna_lnc  |
| 29137 hsa-mir-1-2 | AP001189.1   | 0.395996254 mirna_lnc |
| 29138 hsa-mir-1-2 | AL590226.1   | 0.369154215 mirna_lnc |
| 29139 hsa-mir-1-2 | AC010551.2   | 0.461374819 mirna_lnc |
| 29140 hsa-mir-1-2 | AC139768.2   | 0.375239138 mirna_lnc |
| 29141 hsa-mir-1-2 | AC002546.1   | 0.486529874 mirna_lnc |
| 29142 hsa-mir-1-2 | AC007342.7   | 0.373311605 mirna_lnc |
| 29143 hsa-mir-1-2 | LINC00891    | 0.31132461 mirna_lnc  |
| 29144 hsa-mir-1-2 | AC036108.3   | 0.821639422 mirna_lnc |
| 29145 hsa-mir-1-2 | AL356489.2   | 0.562549248 mirna_lnc |
| 29146 hsa-mir-1-2 | AC124312.2   | 0.466402778 mirna_lnc |
| 29147 hsa-mir-1-2 | ACTA2-AS1    | 0.836431064 mirna_lnc |
| 29148 hsa-mir-1-2 | LINC00163    | 0.499520757 mirna_lnc |
| 29149 hsa-mir-1-2 | AL021368.2   | 0.408924218 mirna_lnc |
| 29150 hsa-mir-1-2 | AC011444.1   | 0.412305206 mirna_lnc |
| 29151 hsa-mir-1-2 | AL109741.1   | 0.517007771 mirna_lnc |
| 29152 hsa-mir-1-2 | AC005180.1   | 0.739212007 mirna_lnc |
| 29153 hsa-mir-1-2 | AC073862.5   | 0.559078223 mirna_lnc |
| 29154 hsa-mir-1-2 | AC103740.1   | 0.504421695 mirna_lnc |
| 29155 hsa-mir-1-2 | AC013643.2   | 0.30269979 mirna_lnc  |
| 29156 hsa-mir-1-2 | AC010680.1   | 0.321985576 mirna_lnc |
| 29157 hsa-mir-1-2 | AC011239.2   | 0.746778477 mirna_lnc |
| 29158 hsa-mir-1-2 | LINC02256    | 0.560498115 mirna_lnc |
| 29159 hsa-mir-1-2 | AC093535.2   | 0.466757141 mirna_lnc |



|                   |            |                       |
|-------------------|------------|-----------------------|
| 29160 hsa-mir-1-2 | AC026124.1 | 0.476385651 mirna_lnc |
| 29161 hsa-mir-1-2 | LINC00641  | 0.471108353 mirna_lnc |
| 29162 hsa-mir-1-2 | GAS1RR     | 0.326030073 mirna_lnc |
| 29163 hsa-mir-1-2 | AC087286.2 | 0.417861427 mirna_lnc |
| 29164 hsa-mir-1-2 | AL139022.2 | 0.416302374 mirna_lnc |
| 29165 hsa-mir-1-2 | AC092111.1 | 0.313544447 mirna_lnc |
| 29166 hsa-mir-1-2 | AC015813.7 | 0.365549497 mirna_lnc |
| 29167 hsa-mir-1-2 | AP000892.3 | 0.746780863 mirna_lnc |
| 29168 hsa-mir-1-2 | TBX5-AS1   | 0.39830915 mirna_lnc  |
| 29169 hsa-mir-1-2 | LINC01422  | 0.331024227 mirna_lnc |
| 29170 hsa-mir-1-2 | AC018752.1 | 0.480002181 mirna_lnc |
| 29171 hsa-mir-1-2 | AC107959.1 | 0.666506908 mirna_lnc |
| 29172 hsa-mir-1-2 | AC134312.1 | 0.457315082 mirna_lnc |
| 29173 hsa-mir-1-2 | AC104260.2 | 0.416028628 mirna_lnc |
| 29174 hsa-mir-1-2 | AL445426.1 | 0.616469738 mirna_lnc |
| 29175 hsa-mir-1-2 | AC120049.1 | 0.386320482 mirna_lnc |
| 29176 hsa-mir-1-2 | AC022034.3 | 0.639989247 mirna_lnc |
| 29177 hsa-mir-1-2 | AC092999.1 | 0.402785242 mirna_lnc |
| 29178 hsa-mir-1-2 | AC005358.2 | 0.599780128 mirna_lnc |
| 29179 hsa-mir-1-2 | KLHL30-AS1 | 0.42803501 mirna_lnc  |
| 29180 hsa-mir-1-2 | AC104083.1 | 0.527554586 mirna_lnc |
| 29181 hsa-mir-1-2 | AC022898.1 | 0.330889943 mirna_lnc |
| 29182 hsa-mir-1-2 | AL031118.1 | 0.457496991 mirna_lnc |
| 29183 hsa-mir-1-2 | AL161457.1 | 0.675586327 mirna_lnc |
| 29184 hsa-mir-1-2 | AC092040.1 | 0.412945979 mirna_lnc |
| 29185 hsa-mir-1-2 | AL603750.1 | 0.463360434 mirna_lnc |
| 29186 hsa-mir-1-2 | AC067750.1 | 0.59141865 mirna_lnc  |
| 29187 hsa-mir-1-2 | AC092422.1 | 0.330030874 mirna_lnc |
| 29188 hsa-mir-1-2 | LINC01352  | 0.603416017 mirna_lnc |
| 29189 hsa-mir-1-2 | AL359710.1 | 0.310624307 mirna_lnc |
| 29190 hsa-mir-1-2 | SACS-AS1   | 0.416325142 mirna_lnc |
| 29191 hsa-mir-1-2 | AC131097.4 | 0.324783693 mirna_lnc |
| 29192 hsa-mir-1-2 | AC234775.3 | 0.319678118 mirna_lnc |
| 29193 hsa-mir-1-2 | AF111167.2 | 0.354506945 mirna_lnc |
| 29194 hsa-mir-1-2 | Z99129.4   | 0.348615681 mirna_lnc |
| 29195 hsa-mir-1-2 | AP000317.2 | 0.305747579 mirna_lnc |
| 29196 hsa-mir-1-2 | AC110491.1 | 0.472287073 mirna_lnc |
| 29197 hsa-mir-1-2 | AC120498.2 | 0.326943342 mirna_lnc |
| 29198 hsa-mir-1-2 | LINC02600  | 0.326920473 mirna_lnc |
| 29199 hsa-mir-1-2 | AC011444.3 | 0.403601877 mirna_lnc |
| 29200 hsa-mir-1-2 | AL954642.1 | 0.419449378 mirna_lnc |
| 29201 hsa-mir-1-2 | AC098484.1 | 0.339429451 mirna_lnc |
| 29202 hsa-mir-1-2 | AC025280.1 | 0.607193751 mirna_lnc |
| 29203 hsa-mir-1-2 | AC037198.2 | 0.616718129 mirna_lnc |
| 29204 hsa-mir-1-2 | AC021683.1 | 0.752720735 mirna_lnc |
| 29205 hsa-mir-1-2 | AL133346.1 | 0.551899619 mirna_lnc |
| 29206 hsa-mir-1-2 | AC013403.2 | 0.354976601 mirna_lnc |
| 29207 hsa-mir-1-2 | AC100803.2 | 0.504810396 mirna_lnc |
| 29208 hsa-mir-1-2 | AC145676.1 | 0.342799221 mirna_lnc |
| 29209 hsa-mir-1-2 | AC246817.1 | 0.314442581 mirna_lnc |
| 29210 hsa-mir-1-2 | AC013553.3 | 0.343323327 mirna_lnc |
| 29211 hsa-mir-1-2 | LINC01990  | 0.371213217 mirna_lnc |
| 29212 hsa-mir-1-2 | AL139300.2 | 0.493918062 mirna_lnc |
| 29213 hsa-mir-1-2 | AC022034.1 | 0.484016754 mirna_lnc |

|       |             |            |             |           |
|-------|-------------|------------|-------------|-----------|
| 29214 | hsa-mir-1-2 | LINC02269  | 0.473516045 | mirna_lnc |
| 29215 | hsa-mir-1-2 | FAM66E     | 0.384298136 | mirna_lnc |
| 29216 | hsa-mir-1-2 | AC002398.2 | 0.696362782 | mirna_lnc |
| 29217 | hsa-mir-1-2 | AP003071.4 | 0.505533283 | mirna_lnc |
| 29218 | hsa-mir-1-2 | AC027807.2 | 0.471640333 | mirna_lnc |
| 29219 | hsa-mir-1-2 | AC020634.1 | 0.390462653 | mirna_lnc |
| 29220 | hsa-mir-1-2 | AC011472.1 | 0.424355623 | mirna_lnc |
| 29221 | hsa-mir-1-2 | AC092376.2 | 0.306092713 | mirna_lnc |
| 29222 | hsa-mir-1-2 | COL4A2-AS1 | 0.382952045 | mirna_lnc |
| 29223 | hsa-mir-1-2 | AL596244.1 | 0.309301128 | mirna_lnc |
| 29224 | hsa-mir-1-2 | AC027306.1 | 0.582614575 | mirna_lnc |
| 29225 | hsa-mir-1-2 | AC053503.5 | 0.401078748 | mirna_lnc |
| 29226 | hsa-mir-1-2 | AL157770.1 | 0.360185845 | mirna_lnc |
| 29227 | hsa-mir-1-2 | AP001324.3 | 0.323384773 | mirna_lnc |
| 29228 | hsa-mir-1-2 | AC068700.1 | 0.38503189  | mirna_lnc |
| 29229 | hsa-mir-1-2 | AC009549.1 | 0.548647573 | mirna_lnc |
| 29230 | hsa-mir-1-2 | AC018521.6 | 0.47898176  | mirna_lnc |
| 29231 | hsa-mir-1-2 | LYPLAL1-DT | 0.485724756 | mirna_lnc |
| 29232 | hsa-mir-1-2 | MEIS1-AS3  | 0.439411189 | mirna_lnc |
| 29233 | hsa-mir-1-2 | AL691447.2 | 0.461463055 | mirna_lnc |
| 29234 | hsa-mir-1-2 | AC011510.1 | 0.385220305 | mirna_lnc |
| 29235 | hsa-mir-1-2 | AL662860.1 | 0.514303096 | mirna_lnc |
| 29236 | hsa-mir-1-2 | AP001189.3 | 0.40868552  | mirna_lnc |
| 29237 | hsa-mir-1-2 | AC092111.2 | 0.362668247 | mirna_lnc |
| 29238 | hsa-mir-1-2 | AF001548.2 | 0.405527137 | mirna_lnc |
| 29239 | hsa-mir-1-2 | AC053503.1 | 0.47407906  | mirna_lnc |
| 29240 | hsa-mir-1-2 | AL122035.1 | 0.494640919 | mirna_lnc |
| 29241 | hsa-mir-1-2 | AC011365.2 | 0.386434005 | mirna_lnc |
| 29242 | hsa-mir-1-2 | AC025809.1 | 0.301776069 | mirna_lnc |
| 29243 | hsa-mir-1-2 | AC068234.2 | 0.461121184 | mirna_lnc |
| 29244 | hsa-mir-1-2 | BARX1-DT   | 0.326414775 | mirna_lnc |
| 29245 | hsa-mir-1-2 | SMC2-AS1   | 0.336263391 | mirna_lnc |
| 29246 | hsa-mir-1-2 | AL583785.1 | 0.504815056 | mirna_lnc |
| 29247 | hsa-mir-1-2 | AC007336.3 | 0.373444145 | mirna_lnc |
| 29248 | hsa-mir-1-2 | AC087521.1 | 0.557363611 | mirna_lnc |
| 29249 | hsa-mir-1-2 | MBNL1-AS1  | 0.796884628 | mirna_lnc |
| 29250 | hsa-mir-1-2 | AC092376.1 | 0.319340953 | mirna_lnc |
| 29251 | hsa-mir-1-2 | AC106786.2 | 0.328038796 | mirna_lnc |
| 29252 | hsa-mir-1-2 | AC121247.1 | 0.345090519 | mirna_lnc |
| 29253 | hsa-mir-1-2 | UBXN10-AS1 | 0.591276691 | mirna_lnc |
| 29254 | hsa-mir-1-2 | AC037198.1 | 0.528411604 | mirna_lnc |
| 29255 | hsa-mir-1-2 | AC090044.1 | 0.54925574  | mirna_lnc |
| 29256 | hsa-mir-1-2 | AL137026.1 | 0.403142986 | mirna_lnc |
| 29257 | hsa-mir-1-2 | BNC2-AS1   | 0.330199698 | mirna_lnc |
| 29258 | hsa-mir-1-2 | AL034346.1 | 0.416717536 | mirna_lnc |
| 29259 | hsa-mir-1-2 | LINC01589  | 0.377819036 | mirna_lnc |
| 29260 | hsa-mir-1-2 | AP000721.2 | 0.390871726 | mirna_lnc |
| 29261 | hsa-mir-1-2 | AL133481.1 | 0.515195919 | mirna_lnc |
| 29262 | hsa-mir-1-2 | AP000915.1 | 0.484946103 | mirna_lnc |
| 29263 | hsa-mir-1-2 | AC036108.2 | 0.778218421 | mirna_lnc |
| 29264 | hsa-mir-1-2 | AC090877.2 | 0.329511729 | mirna_lnc |
| 29265 | hsa-mir-1-2 | AL445423.1 | 0.527761953 | mirna_lnc |
| 29266 | hsa-mir-1-2 | LINC01154  | 0.369438931 | mirna_lnc |
| 29267 | hsa-mir-1-2 | AL136084.3 | 0.442247196 | mirna_lnc |

|       |             |             |             |           |
|-------|-------------|-------------|-------------|-----------|
| 29268 | hsa-mir-1-2 | AP004609.1  | 0.353400314 | mirna_lnc |
| 29269 | hsa-mir-1-2 | AC004825.2  | 0.347785221 | mirna_lnc |
| 29270 | hsa-mir-1-2 | AL357054.4  | 0.592181773 | mirna_lnc |
| 29271 | hsa-mir-1-2 | HLX-AS1     | 0.65035763  | mirna_lnc |
| 29272 | hsa-mir-1-2 | AC254633.1  | 0.428140333 | mirna_lnc |
| 29273 | hsa-mir-1-2 | AC022467.1  | 0.312574578 | mirna_lnc |
| 29274 | hsa-mir-1-2 | FGF14-AS2   | 0.371350795 | mirna_lnc |
| 29275 | hsa-mir-1-2 | AP003096.1  | 0.388946702 | mirna_lnc |
| 29276 | hsa-mir-1-2 | AL391335.1  | 0.448728283 | mirna_lnc |
| 29277 | hsa-mir-1-2 | LINC01394   | 0.619743686 | mirna_lnc |
| 29278 | hsa-mir-1-2 | AL079343.1  | 0.353086178 | mirna_lnc |
| 29279 | hsa-mir-1-2 | KCNMA1-AS3  | 0.440109709 | mirna_lnc |
| 29280 | hsa-mir-1-2 | AC025165.1  | 0.530413819 | mirna_lnc |
| 29281 | hsa-mir-1-2 | AC009320.1  | 0.35254404  | mirna_lnc |
| 29282 | hsa-mir-1-2 | Z99756.1    | 0.338721438 | mirna_lnc |
| 29283 | hsa-mir-1-2 | AL133415.1  | 0.515626325 | mirna_lnc |
| 29284 | hsa-mir-1-2 | AC117489.1  | 0.528721898 | mirna_lnc |
| 29285 | hsa-mir-1-2 | AC093510.2  | 0.324881046 | mirna_lnc |
| 29286 | hsa-mir-1-2 | AP000662.1  | 0.313700834 | mirna_lnc |
| 29287 | hsa-mir-1-2 | AP000941.1  | 0.375363291 | mirna_lnc |
| 29288 | hsa-mir-1-2 | AC106739.1  | 0.375627109 | mirna_lnc |
| 29289 | hsa-mir-1-2 | AL122035.2  | 0.406350168 | mirna_lnc |
| 29290 | hsa-mir-1-2 | LINC02202   | 0.454175189 | mirna_lnc |
| 29291 | hsa-mir-1-2 | AC100793.3  | 0.3766043   | mirna_lnc |
| 29292 | hsa-mir-1-2 | RASGRF2-AS1 | 0.300488783 | mirna_lnc |
| 29293 | hsa-mir-1-2 | AC068506.1  | 0.473078114 | mirna_lnc |
| 29294 | hsa-mir-1-2 | NALT1       | 0.529870154 | mirna_lnc |
| 29295 | hsa-mir-1-2 | AC134312.3  | 0.365623286 | mirna_lnc |
| 29296 | hsa-mir-1-2 | LINC01013   | 0.305191788 | mirna_lnc |
| 29297 | hsa-mir-1-2 | AC079630.1  | 0.38164573  | mirna_lnc |
| 29298 | hsa-mir-1-2 | AL162386.2  | 0.400421132 | mirna_lnc |
| 29299 | hsa-mir-1-2 | AP003071.3  | 0.583392393 | mirna_lnc |
| 29300 | hsa-mir-1-2 | AP003973.2  | 0.307824891 | mirna_lnc |
| 29301 | hsa-mir-93  | AC092667.1  | 0.355051107 | mirna_lnc |
| 29302 | hsa-mir-93  | AC025470.2  | 0.303843605 | mirna_lnc |
| 29303 | hsa-mir-93  | AC012073.1  | 0.514709769 | mirna_lnc |
| 29304 | hsa-mir-93  | AC026356.1  | 0.318375249 | mirna_lnc |
| 29305 | hsa-mir-93  | TMPO-AS1    | 0.387443986 | mirna_lnc |
| 29306 | hsa-mir-93  | SLC12A9-AS1 | 0.386072893 | mirna_lnc |
| 29307 | hsa-mir-93  | AP000808.1  | 0.496573511 | mirna_lnc |
| 29308 | hsa-mir-93  | DDX11-AS1   | 0.340094697 | mirna_lnc |
| 29309 | hsa-mir-93  | AL161891.1  | 0.333642826 | mirna_lnc |
| 29310 | hsa-mir-93  | AC092614.1  | 0.422063249 | mirna_lnc |
| 29311 | hsa-mir-93  | CEP83-DT    | 0.391395141 | mirna_lnc |
| 29312 | hsa-mir-93  | HOXC-AS2    | 0.337896145 | mirna_lnc |
| 29313 | hsa-mir-93  | AL049539.1  | 0.310581947 | mirna_lnc |
| 29314 | hsa-mir-93  | AC074117.1  | 0.311800876 | mirna_lnc |
| 29315 | hsa-mir-93  | AP001469.3  | 0.42593357  | mirna_lnc |
| 29316 | hsa-mir-93  | AC011199.1  | 0.344016831 | mirna_lnc |
| 29317 | hsa-mir-93  | AC004943.2  | 0.311784945 | mirna_lnc |
| 29318 | hsa-mir-93  | AP003071.2  | 0.487546753 | mirna_lnc |
| 29319 | hsa-mir-93  | AC021945.1  | 0.302381356 | mirna_lnc |
| 29320 | hsa-mir-93  | AC025176.1  | 0.332110975 | mirna_lnc |
| 29321 | hsa-mir-93  | AC073842.2  | 0.415876266 | mirna_lnc |

|                  |             |                       |
|------------------|-------------|-----------------------|
| 29322 hsa-mir-93 | LINC01494   | 0.413757777 mirna_lnc |
| 29323 hsa-mir-93 | AC090159.1  | 0.341097223 mirna_lnc |
| 29324 hsa-mir-93 | AC092803.2  | 0.350430123 mirna_lnc |
| 29325 hsa-mir-93 | AC147651.4  | 0.388738721 mirna_lnc |
| 29326 hsa-mir-93 | CLEC12A-AS1 | 0.307687734 mirna_lnc |
| 29327 hsa-mir-93 | AL121759.1  | 0.33192292 mirna_lnc  |
| 29328 hsa-mir-93 | AC009121.1  | 0.426339119 mirna_lnc |
| 29329 hsa-mir-93 | AC024940.6  | 0.331522074 mirna_lnc |
| 29330 hsa-mir-93 | AC006329.1  | 0.338148756 mirna_lnc |
| 29331 hsa-mir-93 | AC073857.1  | 0.30523559 mirna_lnc  |
| 29332 hsa-mir-93 | AC015849.5  | 0.342222612 mirna_lnc |
| 29333 hsa-mir-93 | LINC02367   | 0.557279676 mirna_lnc |
| 29334 hsa-mir-93 | LINC01096   | 0.494074647 mirna_lnc |
| 29335 hsa-mir-93 | AC012360.3  | 0.502491995 mirna_lnc |
| 29336 hsa-mir-93 | AC016705.2  | 0.341492099 mirna_lnc |
| 29337 hsa-mir-93 | AL391069.2  | 0.334810038 mirna_lnc |
| 29338 hsa-mir-93 | AC116049.2  | 0.498165103 mirna_lnc |
| 29339 hsa-mir-93 | AC024267.6  | 0.330660081 mirna_lnc |
| 29340 hsa-mir-93 | AP002336.3  | 0.310347526 mirna_lnc |
| 29341 hsa-mir-93 | AL513497.1  | 0.301056082 mirna_lnc |
| 29342 hsa-mir-93 | AL133243.2  | 0.347669494 mirna_lnc |
| 29343 hsa-mir-93 | AC109347.2  | 0.346306309 mirna_lnc |
| 29344 hsa-mir-93 | AC024230.1  | 0.54314308 mirna_lnc  |
| 29345 hsa-mir-93 | LINC01397   | 0.457045524 mirna_lnc |
| 29346 hsa-mir-93 | AC138904.1  | 0.371379299 mirna_lnc |
| 29347 hsa-mir-93 | AC073517.1  | 0.316993832 mirna_lnc |
| 29348 hsa-mir-93 | AP000487.1  | 0.539126842 mirna_lnc |
| 29349 hsa-mir-93 | AC104971.1  | 0.315761511 mirna_lnc |
| 29350 hsa-mir-93 | AC004943.1  | 0.381450646 mirna_lnc |
| 29351 hsa-mir-93 | AC010186.3  | 0.348812893 mirna_lnc |
| 29352 hsa-mir-93 | AC002076.1  | 0.474214757 mirna_lnc |
| 29353 hsa-mir-93 | LINC01686   | 0.362163773 mirna_lnc |
| 29354 hsa-mir-93 | LINC01143   | 0.389518693 mirna_lnc |
| 29355 hsa-mir-93 | AC018878.1  | 0.351729177 mirna_lnc |
| 29356 hsa-mir-93 | AC100782.1  | 0.392111765 mirna_lnc |
| 29357 hsa-mir-93 | AL354714.1  | 0.365257688 mirna_lnc |
| 29358 hsa-mir-93 | AC104823.1  | 0.303714903 mirna_lnc |
| 29359 hsa-mir-93 | SREBF2-AS1  | 0.347883892 mirna_lnc |
| 29360 hsa-mir-93 | AC078864.1  | 0.480973777 mirna_lnc |
| 29361 hsa-mir-93 | AC073073.2  | 0.369469782 mirna_lnc |
| 29362 hsa-mir-93 | AC044781.1  | 0.422497644 mirna_lnc |
| 29363 hsa-mir-93 | AC100812.1  | 0.309108889 mirna_lnc |
| 29364 hsa-mir-93 | AC011297.1  | 0.43697187 mirna_lnc  |
| 29365 hsa-mir-93 | AC004943.3  | 0.3236431 mirna_lnc   |
| 29366 hsa-mir-93 | AC003986.2  | 0.364963966 mirna_lnc |
| 29367 hsa-mir-93 | AL354892.2  | 0.359391331 mirna_lnc |
| 29368 hsa-mir-93 | AC106820.2  | 0.40425172 mirna_lnc  |
| 29369 hsa-mir-93 | AC026271.3  | 0.477282418 mirna_lnc |
| 29370 hsa-mir-93 | AC016205.1  | 0.47223765 mirna_lnc  |
| 29371 hsa-mir-93 | AC090527.3  | 0.341706898 mirna_lnc |
| 29372 hsa-mir-93 | MYB-AS1     | 0.487687416 mirna_lnc |
| 29373 hsa-mir-93 | AP002336.1  | 0.319129892 mirna_lnc |
| 29374 hsa-mir-93 | AC023034.2  | 0.336236062 mirna_lnc |
| 29375 hsa-mir-93 | AC123905.1  | 0.329045482 mirna_lnc |

|                  |             |                       |
|------------------|-------------|-----------------------|
| 29376 hsa-mir-93 | RNASEH1-AS1 | 0.34165189 mirna_lnc  |
| 29377 hsa-mir-93 | AL157392.1  | 0.310193744 mirna_lnc |
| 29378 hsa-mir-93 | AC092669.1  | 0.400764107 mirna_lnc |
| 29379 hsa-mir-93 | HGC6.3      | 0.470873697 mirna_lnc |
| 29380 hsa-mir-93 | AP002336.2  | 0.551300531 mirna_lnc |
| 29381 hsa-mir-93 | AC099568.2  | 0.340318515 mirna_lnc |
| 29382 hsa-mir-93 | AC011773.1  | 0.453660334 mirna_lnc |
| 29383 hsa-mir-93 | AC006206.1  | 0.349219862 mirna_lnc |
| 29384 hsa-mir-93 | AC069222.1  | 0.336852776 mirna_lnc |
| 29385 hsa-mir-93 | LINC02562   | 0.358105869 mirna_lnc |
| 29386 hsa-mir-93 | AC126407.1  | 0.309870536 mirna_lnc |
| 29387 hsa-mir-93 | AC008115.2  | 0.344435826 mirna_lnc |
| 29388 hsa-mir-93 | AC009271.1  | 0.310194229 mirna_lnc |
| 29389 hsa-mir-93 | AC098818.2  | 0.358441963 mirna_lnc |
| 29390 hsa-mir-93 | AC068473.3  | 0.360675719 mirna_lnc |
| 29391 hsa-mir-93 | AC104596.1  | 0.387386914 mirna_lnc |
| 29392 hsa-mir-93 | TCF7L1-IT1  | 0.313031094 mirna_lnc |
| 29393 hsa-mir-93 | AC107214.1  | 0.374462718 mirna_lnc |
| 29394 hsa-mir-93 | LINC00885   | 0.377330159 mirna_lnc |
| 29395 hsa-mir-93 | AL022324.3  | 0.327394436 mirna_lnc |
| 29396 hsa-mir-93 | AC007683.2  | 0.349142716 mirna_lnc |
| 29397 hsa-mir-93 | AL157832.2  | 0.461074546 mirna_lnc |
| 29398 hsa-mir-93 | AC006206.2  | 0.342765241 mirna_lnc |
| 29399 hsa-mir-93 | AP003071.1  | 0.432476943 mirna_lnc |
| 29400 hsa-mir-93 | AP000487.2  | 0.316078651 mirna_lnc |
| 29401 hsa-mir-93 | AL603832.1  | 0.331309103 mirna_lnc |
| 29402 hsa-mir-93 | AC007848.2  | 0.331715059 mirna_lnc |
| 29403 hsa-mir-93 | AL591167.1  | 0.407339338 mirna_lnc |
| 29404 hsa-mir-93 | AL031186.1  | 0.404347755 mirna_lnc |
| 29405 hsa-mir-93 | LINC01258   | 0.355149012 mirna_lnc |
| 29406 hsa-mir-93 | AC046168.1  | 0.369868626 mirna_lnc |
| 29407 hsa-mir-93 | AP000892.1  | 0.302368913 mirna_lnc |
| 29408 hsa-mir-93 | AC007541.1  | 0.311455992 mirna_lnc |
| 29409 hsa-mir-93 | AC006946.2  | 0.322808241 mirna_lnc |
| 29410 hsa-mir-93 | AC025219.1  | 0.342885252 mirna_lnc |
| 29411 hsa-mir-93 | AC005865.1  | 0.338776975 mirna_lnc |
| 29412 hsa-mir-93 | AC007250.1  | 0.36418487 mirna_lnc  |
| 29413 hsa-mir-93 | AC090197.1  | 0.301590322 mirna_lnc |
| 29414 hsa-mir-93 | AL138767.3  | 0.474391084 mirna_lnc |
| 29415 hsa-mir-93 | AC098936.1  | 0.482259117 mirna_lnc |
| 29416 hsa-mir-93 | ETV5-AS1    | 0.530550461 mirna_lnc |
| 29417 hsa-mir-93 | AC107068.1  | 0.331961576 mirna_lnc |
| 29418 hsa-mir-93 | SEMA6A-AS2  | 0.335689482 mirna_lnc |
| 29419 hsa-mir-93 | AC004969.1  | 0.32773811 mirna_lnc  |
| 29420 hsa-mir-93 | AP001783.1  | 0.429216393 mirna_lnc |
| 29421 hsa-mir-93 | LINC02457   | 0.432021178 mirna_lnc |
| 29422 hsa-mir-93 | AC084782.2  | 0.323365026 mirna_lnc |
| 29423 hsa-mir-93 | AL118511.1  | 0.47318506 mirna_lnc  |
| 29424 hsa-mir-93 | AC027348.1  | 0.375341402 mirna_lnc |
| 29425 hsa-mir-93 | AC008115.3  | 0.326036962 mirna_lnc |
| 29426 hsa-mir-93 | GIHCG       | 0.308712413 mirna_lnc |
| 29427 hsa-mir-93 | AL359881.3  | 0.330905405 mirna_lnc |
| 29428 hsa-mir-93 | AP000808.2  | 0.473775372 mirna_lnc |
| 29429 hsa-mir-93 | LINC02470   | 0.455133242 mirna_lnc |

|                    |             |                        |
|--------------------|-------------|------------------------|
| 29430 hsa-mir-93   | AC008443. 3 | 0. 326556423 mirna_lnc |
| 29431 hsa-mir-93   | AC106820. 4 | 0. 571492236 mirna_lnc |
| 29432 hsa-mir-93   | LINC02097   | 0. 3266773 mirna_lnc   |
| 29433 hsa-mir-93   | LINC00173   | 0. 381303213 mirna_lnc |
| 29434 hsa-mir-93   | AC131159. 1 | 0. 337911895 mirna_lnc |
| 29435 hsa-mir-93   | AL662884. 1 | 0. 300927622 mirna_lnc |
| 29436 hsa-mir-93   | AC007497. 1 | 0. 363429682 mirna_lnc |
| 29437 hsa-mir-93   | ADNP-AS1    | 0. 301385465 mirna_lnc |
| 29438 hsa-mir-93   | AC108451. 1 | 0. 322452064 mirna_lnc |
| 29439 hsa-mir-93   | AC093788. 1 | 0. 30159129 mirna_lnc  |
| 29440 hsa-mir-93   | AC125603. 4 | 0. 385115312 mirna_lnc |
| 29441 hsa-mir-93   | LINC01936   | 0. 359251252 mirna_lnc |
| 29442 hsa-mir-93   | AL358115. 1 | 0. 387709763 mirna_lnc |
| 29443 hsa-mir-93   | AL049646. 1 | 0. 360411608 mirna_lnc |
| 29444 hsa-mir-93   | AC092718. 5 | 0. 323322749 mirna_lnc |
| 29445 hsa-mir-93   | AC097534. 1 | 0. 394460403 mirna_lnc |
| 29446 hsa-mir-93   | AC016229. 2 | 0. 353743506 mirna_lnc |
| 29447 hsa-mir-93   | AL596202. 1 | 0. 433841308 mirna_lnc |
| 29448 hsa-mir-93   | AC006487. 1 | 0. 323924517 mirna_lnc |
| 29449 hsa-mir-93   | AF213884. 3 | 0. 370329727 mirna_lnc |
| 29450 hsa-mir-93   | AC008033. 3 | 0. 450475227 mirna_lnc |
| 29451 hsa-mir-93   | AC108704. 1 | 0. 353511167 mirna_lnc |
| 29452 hsa-mir-93   | AP002490. 1 | 0. 318199705 mirna_lnc |
| 29453 hsa-mir-93   | AC009970. 1 | 0. 337365376 mirna_lnc |
| 29454 hsa-mir-3648 | AC103746. 1 | 0. 460500226 mirna_lnc |
| 29455 hsa-mir-3648 | AC019294. 2 | 0. 39505932 mirna_lnc  |
| 29456 hsa-mir-3648 | AC129492. 5 | 0. 310924857 mirna_lnc |
| 29457 hsa-mir-3648 | LINC02593   | 0. 36413245 mirna_lnc  |
| 29458 hsa-mir-3648 | LINC01625   | 0. 449704415 mirna_lnc |
| 29459 hsa-mir-3648 | SCAT2       | 0. 391290866 mirna_lnc |
| 29460 hsa-mir-3648 | LINC02043   | 0. 360183766 mirna_lnc |
| 29461 hsa-mir-3648 | DEPDC1-AS1  | 0. 401647911 mirna_lnc |
| 29462 hsa-mir-3648 | AC022387. 1 | 0. 302304617 mirna_lnc |
| 29463 hsa-mir-3648 | AL139288. 1 | 0. 349710996 mirna_lnc |
| 29464 hsa-mir-3648 | AL354977. 2 | 0. 347214874 mirna_lnc |
| 29465 hsa-mir-3648 | AC104667. 1 | 0. 328143129 mirna_lnc |
| 29466 hsa-mir-3648 | AC021224. 1 | 0. 301482837 mirna_lnc |
| 29467 hsa-mir-3648 | AL137802. 2 | 0. 395114566 mirna_lnc |
| 29468 hsa-mir-3648 | AC093642. 2 | 0. 396391301 mirna_lnc |
| 29469 hsa-mir-3648 | AL157823. 2 | 0. 307314091 mirna_lnc |
| 29470 hsa-mir-3648 | AP000553. 2 | 0. 401532171 mirna_lnc |
| 29471 hsa-mir-3648 | AC110813. 1 | 0. 361075336 mirna_lnc |
| 29472 hsa-mir-3648 | LINC01087   | 0. 352232769 mirna_lnc |
| 29473 hsa-mir-3648 | AC135803. 1 | 0. 455706125 mirna_lnc |
| 29474 hsa-mir-3648 | AC138904. 1 | 0. 393976738 mirna_lnc |
| 29475 hsa-mir-3648 | LINC01267   | 0. 310229247 mirna_lnc |
| 29476 hsa-mir-3648 | TGFB2-AS1   | 0. 325376097 mirna_lnc |
| 29477 hsa-mir-3648 | LINC02334   | 0. 358958522 mirna_lnc |
| 29478 hsa-mir-3648 | AC090578. 2 | 0. 377709753 mirna_lnc |
| 29479 hsa-mir-3648 | AL078605. 1 | 0. 398053433 mirna_lnc |
| 29480 hsa-mir-3648 | AC012150. 1 | 0. 36848688 mirna_lnc  |
| 29481 hsa-mir-3648 | AC130650. 2 | 0. 306277944 mirna_lnc |
| 29482 hsa-mir-3648 | AL592494. 2 | 0. 354515568 mirna_lnc |
| 29483 hsa-mir-3648 | AC007996. 1 | 0. 345904237 mirna_lnc |

|                    |             |                        |
|--------------------|-------------|------------------------|
| 29484 hsa-mir-3648 | AP003696. 1 | 0. 308866551 mirna_lnc |
| 29485 hsa-mir-3648 | AC016708. 1 | 0. 471018259 mirna_lnc |
| 29486 hsa-mir-3648 | AC099786. 1 | 0. 449835713 mirna_lnc |
| 29487 hsa-mir-3648 | AC109326. 1 | 0. 322471767 mirna_lnc |
| 29488 hsa-mir-3648 | AF250324. 1 | 0. 420737899 mirna_lnc |
| 29489 hsa-mir-3648 | AL135790. 1 | 0. 325162319 mirna_lnc |
| 29490 hsa-mir-3648 | DNM3-IT1    | 0. 452660462 mirna_lnc |
| 29491 hsa-mir-3648 | AL451064. 1 | 0. 436988883 mirna_lnc |
| 29492 hsa-mir-3648 | AP000355. 1 | 0. 305124667 mirna_lnc |
| 29493 hsa-mir-3648 | AL645608. 4 | 0. 435461511 mirna_lnc |
| 29494 hsa-mir-3648 | AC008115. 1 | 0. 309072048 mirna_lnc |
| 29495 hsa-mir-3648 | AL136528. 1 | 0. 367653493 mirna_lnc |
| 29496 hsa-mir-3648 | AC007663. 3 | 0. 305728703 mirna_lnc |
| 29497 hsa-mir-3648 | LINC02594   | 0. 356149099 mirna_lnc |
| 29498 hsa-mir-3648 | AL162376. 1 | 0. 394696715 mirna_lnc |
| 29499 hsa-mir-3648 | AC010735. 1 | 0. 429243581 mirna_lnc |
| 29500 hsa-mir-3648 | AC079600. 3 | 0. 300100345 mirna_lnc |
| 29501 hsa-mir-3648 | AP000320. 1 | 0. 373366324 mirna_lnc |
| 29502 hsa-mir-3648 | UFL1-AS1    | 0. 304474321 mirna_lnc |
| 29503 hsa-mir-3648 | AC008649. 1 | 0. 323229762 mirna_lnc |
| 29504 hsa-mir-3648 | LINC01238   | 0. 367808775 mirna_lnc |
| 29505 hsa-mir-3648 | ATP2B1-AS1  | 0. 406229744 mirna_lnc |
| 29506 hsa-mir-3648 | AP000255. 1 | 0. 42385379 mirna_lnc  |
| 29507 hsa-mir-3648 | AC104072. 1 | 0. 513382835 mirna_lnc |
| 29508 hsa-mir-3648 | CAHM        | 0. 321026347 mirna_lnc |
| 29509 hsa-mir-3648 | AC010336. 2 | 0. 30973097 mirna_lnc  |
| 29510 hsa-mir-3648 | AC092447. 5 | 0. 312483619 mirna_lnc |
| 29511 hsa-mir-3648 | AC010336. 5 | 0. 381208413 mirna_lnc |
| 29512 hsa-mir-3648 | LINC01901   | 0. 321143991 mirna_lnc |
| 29513 hsa-mir-3648 | SMC2-AS1    | 0. 431074888 mirna_lnc |
| 29514 hsa-mir-3648 | AL355810. 1 | 0. 347467681 mirna_lnc |
| 29515 hsa-mir-3648 | MAGEA8-AS1  | 0. 319285953 mirna_lnc |
| 29516 hsa-mir-3648 | AOAH-IT1    | 0. 31324789 mirna_lnc  |
| 29517 hsa-mir-3648 | AC004925. 1 | 0. 368949759 mirna_lnc |
| 29518 hsa-mir-3648 | AP000350. 5 | 0. 541045027 mirna_lnc |
| 29519 hsa-mir-3648 | AC073389. 3 | 0. 311734977 mirna_lnc |
| 29520 hsa-mir-3648 | MAPT-IT1    | 0. 370950607 mirna_lnc |
| 29521 hsa-mir-3648 | U91328. 3   | 0. 308038701 mirna_lnc |
| 29522 hsa-mir-3648 | AP000350. 7 | 0. 357782043 mirna_lnc |
| 29523 hsa-mir-3648 | AL596330. 1 | 0. 401801069 mirna_lnc |
| 29524 hsa-mir-3648 | LINC02636   | 0. 402737366 mirna_lnc |
| 29525 hsa-mir-3648 | AL138831. 2 | 0. 328221001 mirna_lnc |
| 29526 hsa-mir-3648 | AL645608. 6 | 0. 332099611 mirna_lnc |
| 29527 hsa-mir-3648 | AL451064. 2 | 0. 405162231 mirna_lnc |
| 29528 hsa-mir-3648 | AL353726. 2 | 0. 332083119 mirna_lnc |
| 29529 hsa-mir-3648 | SPACA6P-AS  | 0. 34368913 mirna_lnc  |
| 29530 hsa-mir-3648 | AL109910. 2 | 0. 379790531 mirna_lnc |
| 29531 hsa-mir-3648 | L29074. 1   | 0. 344185898 mirna_lnc |
| 29532 hsa-mir-3648 | AL359541. 1 | 0. 345631504 mirna_lnc |
| 29533 hsa-mir-3648 | AL157931. 1 | 0. 497259371 mirna_lnc |
| 29534 hsa-mir-3648 | AL354919. 1 | 0. 498375289 mirna_lnc |
| 29535 hsa-mir-3648 | AL161729. 4 | 0. 432287854 mirna_lnc |
| 29536 hsa-mir-3648 | AL645608. 2 | 0. 370837532 mirna_lnc |
| 29537 hsa-mir-3648 | AC010735. 2 | 0. 403961949 mirna_lnc |

|                    |            |                       |
|--------------------|------------|-----------------------|
| 29538 hsa-mir-3648 | AL024498.1 | 0.363769012 mirna_lnc |
| 29539 hsa-mir-3648 | AC100793.2 | 0.341369004 mirna_lnc |
| 29540 hsa-mir-18a  | AC012073.1 | 0.373334959 mirna_lnc |
| 29541 hsa-mir-18a  | AC245100.6 | 0.313323883 mirna_lnc |
| 29542 hsa-mir-18a  | AC010761.2 | 0.352072438 mirna_lnc |
| 29543 hsa-mir-18a  | TMPO-AS1   | 0.363671777 mirna_lnc |
| 29544 hsa-mir-18a  | AP000808.1 | 0.311886026 mirna_lnc |
| 29545 hsa-mir-18a  | AL035461.2 | 0.3702715 mirna_lnc   |
| 29546 hsa-mir-18a  | AL138759.1 | 0.370441176 mirna_lnc |
| 29547 hsa-mir-18a  | AC004241.3 | 0.302821482 mirna_lnc |
| 29548 hsa-mir-18a  | AL161891.1 | 0.41922603 mirna_lnc  |
| 29549 hsa-mir-18a  | AP000873.3 | 0.329560785 mirna_lnc |
| 29550 hsa-mir-18a  | SCAT2      | 0.388937687 mirna_lnc |
| 29551 hsa-mir-18a  | AC092614.1 | 0.360730049 mirna_lnc |
| 29552 hsa-mir-18a  | AP003352.1 | 0.335596899 mirna_lnc |
| 29553 hsa-mir-18a  | AL049539.1 | 0.36224343 mirna_lnc  |
| 29554 hsa-mir-18a  | AC074117.1 | 0.352438683 mirna_lnc |
| 29555 hsa-mir-18a  | AC021945.1 | 0.422905801 mirna_lnc |
| 29556 hsa-mir-18a  | AC025176.1 | 0.315152704 mirna_lnc |
| 29557 hsa-mir-18a  | AC090844.3 | 0.397363742 mirna_lnc |
| 29558 hsa-mir-18a  | AC008738.2 | 0.314393577 mirna_lnc |
| 29559 hsa-mir-18a  | AC131009.3 | 0.444641303 mirna_lnc |
| 29560 hsa-mir-18a  | AC017083.1 | 0.312085241 mirna_lnc |
| 29561 hsa-mir-18a  | AC147651.4 | 0.315317863 mirna_lnc |
| 29562 hsa-mir-18a  | AL356299.2 | 0.331494644 mirna_lnc |
| 29563 hsa-mir-18a  | AC093484.4 | 0.387971048 mirna_lnc |
| 29564 hsa-mir-18a  | AC024940.6 | 0.423462446 mirna_lnc |
| 29565 hsa-mir-18a  | LINC01952  | 0.345604295 mirna_lnc |
| 29566 hsa-mir-18a  | AC107081.2 | 0.383758581 mirna_lnc |
| 29567 hsa-mir-18a  | AL451050.2 | 0.315580811 mirna_lnc |
| 29568 hsa-mir-18a  | AC079907.1 | 0.396233345 mirna_lnc |
| 29569 hsa-mir-18a  | AC125257.1 | 0.319644398 mirna_lnc |
| 29570 hsa-mir-18a  | AC004835.1 | 0.321982495 mirna_lnc |
| 29571 hsa-mir-18a  | AC010536.1 | 0.310325432 mirna_lnc |
| 29572 hsa-mir-18a  | AC012360.3 | 0.314047872 mirna_lnc |
| 29573 hsa-mir-18a  | AC008543.1 | 0.408569549 mirna_lnc |
| 29574 hsa-mir-18a  | AC016394.2 | 0.3724236 mirna_lnc   |
| 29575 hsa-mir-18a  | HOXC-AS3   | 0.338388587 mirna_lnc |
| 29576 hsa-mir-18a  | AC130324.2 | 0.311597883 mirna_lnc |
| 29577 hsa-mir-18a  | AJ239322.1 | 0.32071231 mirna_lnc  |
| 29578 hsa-mir-18a  | AC004080.1 | 0.332986847 mirna_lnc |
| 29579 hsa-mir-18a  | AL121832.3 | 0.344663034 mirna_lnc |
| 29580 hsa-mir-18a  | GK-IT1     | 0.309447517 mirna_lnc |
| 29581 hsa-mir-18a  | LINC01424  | 0.367630036 mirna_lnc |
| 29582 hsa-mir-18a  | AC026992.2 | 0.31115063 mirna_lnc  |
| 29583 hsa-mir-18a  | AL358473.1 | 0.407938411 mirna_lnc |
| 29584 hsa-mir-18a  | AC079684.1 | 0.308465768 mirna_lnc |
| 29585 hsa-mir-18a  | AL163051.1 | 0.358498758 mirna_lnc |
| 29586 hsa-mir-18a  | AC104971.1 | 0.324575854 mirna_lnc |
| 29587 hsa-mir-18a  | AC004943.1 | 0.33487424 mirna_lnc  |
| 29588 hsa-mir-18a  | AC132192.2 | 0.304680239 mirna_lnc |
| 29589 hsa-mir-18a  | LINC01357  | 0.453821679 mirna_lnc |
| 29590 hsa-mir-18a  | LINC01686  | 0.325559644 mirna_lnc |
| 29591 hsa-mir-18a  | AC018878.1 | 0.357094797 mirna_lnc |



|                   |             |                       |
|-------------------|-------------|-----------------------|
| 29592 hsa-mir-18a | AC002550.1  | 0.373013758 mirna_lnc |
| 29593 hsa-mir-18a | AC099518.2  | 0.329412223 mirna_lnc |
| 29594 hsa-mir-18a | TRPM2-AS    | 0.329805709 mirna_lnc |
| 29595 hsa-mir-18a | AC012150.1  | 0.31314936 mirna_lnc  |
| 29596 hsa-mir-18a | AP003086.1  | 0.301047543 mirna_lnc |
| 29597 hsa-mir-18a | AF186192.3  | 0.300719517 mirna_lnc |
| 29598 hsa-mir-18a | SREBF2-AS1  | 0.324766082 mirna_lnc |
| 29599 hsa-mir-18a | AP003696.1  | 0.302518138 mirna_lnc |
| 29600 hsa-mir-18a | AC004943.3  | 0.431304247 mirna_lnc |
| 29601 hsa-mir-18a | AL117382.1  | 0.332309489 mirna_lnc |
| 29602 hsa-mir-18a | AL121721.1  | 0.307747271 mirna_lnc |
| 29603 hsa-mir-18a | AL354892.2  | 0.316320388 mirna_lnc |
| 29604 hsa-mir-18a | AL390961.3  | 0.340570066 mirna_lnc |
| 29605 hsa-mir-18a | AP002360.3  | 0.317769373 mirna_lnc |
| 29606 hsa-mir-18a | AC016205.1  | 0.338168909 mirna_lnc |
| 29607 hsa-mir-18a | PIK3CD-AS2  | 0.309394998 mirna_lnc |
| 29608 hsa-mir-18a | AC090527.3  | 0.308404435 mirna_lnc |
| 29609 hsa-mir-18a | MYB-AS1     | 0.369530081 mirna_lnc |
| 29610 hsa-mir-18a | RNASEH1-AS1 | 0.514030909 mirna_lnc |
| 29611 hsa-mir-18a | MPRIP-AS1   | 0.328016631 mirna_lnc |
| 29612 hsa-mir-18a | AC005379.1  | 0.405690159 mirna_lnc |
| 29613 hsa-mir-18a | AL390961.2  | 0.374873244 mirna_lnc |
| 29614 hsa-mir-18a | AL139082.1  | 0.301252676 mirna_lnc |
| 29615 hsa-mir-18a | AC084757.2  | 0.373331753 mirna_lnc |
| 29616 hsa-mir-18a | AC005224.1  | 0.35344941 mirna_lnc  |
| 29617 hsa-mir-18a | AC011773.1  | 0.399842815 mirna_lnc |
| 29618 hsa-mir-18a | AL024508.2  | 0.393658856 mirna_lnc |
| 29619 hsa-mir-18a | AL359880.1  | 0.310750949 mirna_lnc |
| 29620 hsa-mir-18a | AC008115.1  | 0.304035105 mirna_lnc |
| 29621 hsa-mir-18a | AC083843.3  | 0.306896022 mirna_lnc |
| 29622 hsa-mir-18a | AC007938.3  | 0.368680129 mirna_lnc |
| 29623 hsa-mir-18a | AC098818.2  | 0.345869986 mirna_lnc |
| 29624 hsa-mir-18a | AC113143.1  | 0.372924705 mirna_lnc |
| 29625 hsa-mir-18a | LINC02204   | 0.319781179 mirna_lnc |
| 29626 hsa-mir-18a | AC103810.5  | 0.302978314 mirna_lnc |
| 29627 hsa-mir-18a | ODF2-AS1    | 0.309031413 mirna_lnc |
| 29628 hsa-mir-18a | AL603832.1  | 0.361205769 mirna_lnc |
| 29629 hsa-mir-18a | AL512652.2  | 0.328745113 mirna_lnc |
| 29630 hsa-mir-18a | AC019129.2  | 0.3027722 mirna_lnc   |
| 29631 hsa-mir-18a | AP006621.5  | 0.397909917 mirna_lnc |
| 29632 hsa-mir-18a | LBX2-AS1    | 0.318744864 mirna_lnc |
| 29633 hsa-mir-18a | AP003086.2  | 0.435582051 mirna_lnc |
| 29634 hsa-mir-18a | AP001775.2  | 0.407531974 mirna_lnc |
| 29635 hsa-mir-18a | AC079915.1  | 0.309237702 mirna_lnc |
| 29636 hsa-mir-18a | AC007638.2  | 0.321496193 mirna_lnc |
| 29637 hsa-mir-18a | AC006111.2  | 0.386442095 mirna_lnc |
| 29638 hsa-mir-18a | AC090907.2  | 0.370278034 mirna_lnc |
| 29639 hsa-mir-18a | AC011700.1  | 0.339331087 mirna_lnc |
| 29640 hsa-mir-18a | AC009704.2  | 0.312650578 mirna_lnc |
| 29641 hsa-mir-18a | AP001160.1  | 0.347081148 mirna_lnc |
| 29642 hsa-mir-18a | AC124798.1  | 0.417065286 mirna_lnc |
| 29643 hsa-mir-18a | AC116025.2  | 0.358557348 mirna_lnc |
| 29644 hsa-mir-18a | AC005089.1  | 0.332824645 mirna_lnc |
| 29645 hsa-mir-18a | MCF2L-AS1   | 0.309776719 mirna_lnc |

|                    |            |                       |
|--------------------|------------|-----------------------|
| 29646 hsa-mir-18a  | AL138767.3 | 0.32173338 mirna_lnc  |
| 29647 hsa-mir-18a  | AC098936.1 | 0.34169758 mirna_lnc  |
| 29648 hsa-mir-18a  | AL607028.1 | 0.362127037 mirna_lnc |
| 29649 hsa-mir-18a  | AC005046.1 | 0.407313654 mirna_lnc |
| 29650 hsa-mir-18a  | BX284668.6 | 0.3021141 mirna_lnc   |
| 29651 hsa-mir-18a  | AL356488.3 | 0.306560055 mirna_lnc |
| 29652 hsa-mir-18a  | LINC02365  | 0.436462372 mirna_lnc |
| 29653 hsa-mir-18a  | LINC01979  | 0.311092203 mirna_lnc |
| 29654 hsa-mir-18a  | AL118511.1 | 0.44170077 mirna_lnc  |
| 29655 hsa-mir-18a  | AC093620.1 | 0.336186123 mirna_lnc |
| 29656 hsa-mir-18a  | AC007001.1 | 0.341321381 mirna_lnc |
| 29657 hsa-mir-18a  | AC090627.1 | 0.318769859 mirna_lnc |
| 29658 hsa-mir-18a  | AP003392.3 | 0.431391854 mirna_lnc |
| 29659 hsa-mir-18a  | AL133351.1 | 0.377252143 mirna_lnc |
| 29660 hsa-mir-18a  | LINC02470  | 0.328359662 mirna_lnc |
| 29661 hsa-mir-18a  | CEBPA-DT   | 0.305279751 mirna_lnc |
| 29662 hsa-mir-18a  | AC106820.4 | 0.331348922 mirna_lnc |
| 29663 hsa-mir-18a  | AC133961.1 | 0.320062673 mirna_lnc |
| 29664 hsa-mir-18a  | LINC00311  | 0.35659535 mirna_lnc  |
| 29665 hsa-mir-18a  | LINC00543  | 0.342144208 mirna_lnc |
| 29666 hsa-mir-18a  | LINC02575  | 0.324660716 mirna_lnc |
| 29667 hsa-mir-18a  | AC005391.1 | 0.383390976 mirna_lnc |
| 29668 hsa-mir-18a  | AC080129.2 | 0.315010081 mirna_lnc |
| 29669 hsa-mir-18a  | AC004593.1 | 0.322595134 mirna_lnc |
| 29670 hsa-mir-18a  | AC007038.2 | 0.327487682 mirna_lnc |
| 29671 hsa-mir-18a  | LINC01106  | 0.34492531 mirna_lnc  |
| 29672 hsa-mir-18a  | AP001972.4 | 0.333102378 mirna_lnc |
| 29673 hsa-mir-18a  | AL596202.1 | 0.30427723 mirna_lnc  |
| 29674 hsa-mir-18a  | AC026462.3 | 0.307529733 mirna_lnc |
| 29675 hsa-mir-18a  | AP001476.1 | 0.318264478 mirna_lnc |
| 29676 hsa-mir-18a  | AL136221.1 | 0.355218364 mirna_lnc |
| 29677 hsa-mir-18a  | AL080317.1 | 0.363966109 mirna_lnc |
| 29678 hsa-mir-18a  | AC008033.3 | 0.30013874 mirna_lnc  |
| 29679 hsa-mir-18a  | AC021092.1 | 0.304960282 mirna_lnc |
| 29680 hsa-mir-18a  | PSPC1-AS2  | 0.307968233 mirna_lnc |
| 29681 hsa-mir-18a  | AC099684.2 | 0.344589127 mirna_lnc |
| 29682 hsa-mir-18a  | AL356740.2 | 0.317073889 mirna_lnc |
| 29683 hsa-mir-301b | AP000708.1 | 0.395777177 mirna_lnc |
| 29684 hsa-mir-301b | LINC02595  | 0.440118752 mirna_lnc |
| 29685 hsa-mir-301b | AL662797.1 | 0.331669883 mirna_lnc |
| 29686 hsa-mir-301b | LINC01873  | 0.487143599 mirna_lnc |
| 29687 hsa-mir-301b | MELTF-AS1  | 0.34937902 mirna_lnc  |
| 29688 hsa-mir-301b | TMPO-AS1   | 0.355779816 mirna_lnc |
| 29689 hsa-mir-301b | AC103591.3 | 0.477323045 mirna_lnc |
| 29690 hsa-mir-301b | AC004241.3 | 0.565735132 mirna_lnc |
| 29691 hsa-mir-301b | CEP83-DT   | 0.307993543 mirna_lnc |
| 29692 hsa-mir-301b | AL590326.1 | 0.319510372 mirna_lnc |
| 29693 hsa-mir-301b | JARID2-AS1 | 0.571015483 mirna_lnc |
| 29694 hsa-mir-301b | LINC00853  | 0.369904292 mirna_lnc |
| 29695 hsa-mir-301b | AC074117.1 | 0.332707982 mirna_lnc |
| 29696 hsa-mir-301b | AL031667.3 | 0.576675543 mirna_lnc |
| 29697 hsa-mir-301b | TFAP2A-AS1 | 0.482626226 mirna_lnc |
| 29698 hsa-mir-301b | AC100791.2 | 0.407995054 mirna_lnc |
| 29699 hsa-mir-301b | LINC02542  | 0.443353494 mirna_lnc |

|                    |                 |                       |
|--------------------|-----------------|-----------------------|
| 29700 hsa-mir-301b | AC092159.2      | 0.344324881 mirna_lnc |
| 29701 hsa-mir-301b | AL023803.3      | 0.446231165 mirna_lnc |
| 29702 hsa-mir-301b | AC017083.1      | 0.321438668 mirna_lnc |
| 29703 hsa-mir-301b | AL121655.1      | 0.463929616 mirna_lnc |
| 29704 hsa-mir-301b | AC109322.1      | 0.41798747 mirna_lnc  |
| 29705 hsa-mir-301b | LINC01952       | 0.325853236 mirna_lnc |
| 29706 hsa-mir-301b | AC074351.1      | 0.449480116 mirna_lnc |
| 29707 hsa-mir-301b | KC877982.1      | 0.377814461 mirna_lnc |
| 29708 hsa-mir-301b | AL445072.1      | 0.379912407 mirna_lnc |
| 29709 hsa-mir-301b | AL592301.1      | 0.318414603 mirna_lnc |
| 29710 hsa-mir-301b | AC023157.3      | 0.360263766 mirna_lnc |
| 29711 hsa-mir-301b | AL137802.2      | 0.376005086 mirna_lnc |
| 29712 hsa-mir-301b | AC087289.3      | 0.378046224 mirna_lnc |
| 29713 hsa-mir-301b | AL136162.1      | 0.568326336 mirna_lnc |
| 29714 hsa-mir-301b | AC073195.1      | 0.500473225 mirna_lnc |
| 29715 hsa-mir-301b | AC015818.2      | 0.411933813 mirna_lnc |
| 29716 hsa-mir-301b | AL596094.1      | 0.509813579 mirna_lnc |
| 29717 hsa-mir-301b | AC004069.1      | 0.579539654 mirna_lnc |
| 29718 hsa-mir-301b | LINC01096       | 0.348692597 mirna_lnc |
| 29719 hsa-mir-301b | AC131025.1      | 0.365212908 mirna_lnc |
| 29720 hsa-mir-301b | AC004920.1      | 0.636369611 mirna_lnc |
| 29721 hsa-mir-301b | AC021683.3      | 0.652854809 mirna_lnc |
| 29722 hsa-mir-301b | AC109992.2      | 0.302752707 mirna_lnc |
| 29723 hsa-mir-301b | AC016877.3      | 0.360710106 mirna_lnc |
| 29724 hsa-mir-301b | AL391069.2      | 0.393861102 mirna_lnc |
| 29725 hsa-mir-301b | AC012640.2      | 0.477641613 mirna_lnc |
| 29726 hsa-mir-301b | AC090970.2      | 0.42921189 mirna_lnc  |
| 29727 hsa-mir-301b | AC026782.2      | 0.436012313 mirna_lnc |
| 29728 hsa-mir-301b | AC116049.2      | 0.357196326 mirna_lnc |
| 29729 hsa-mir-301b | AP003119.2      | 0.4888287 mirna_lnc   |
| 29730 hsa-mir-301b | AL513497.1      | 0.351840568 mirna_lnc |
| 29731 hsa-mir-301b | AC025244.1      | 0.337481817 mirna_lnc |
| 29732 hsa-mir-301b | ATP6V1B1-AS1    | 0.322524585 mirna_lnc |
| 29733 hsa-mir-301b | AL353764.1      | 0.487189523 mirna_lnc |
| 29734 hsa-mir-301b | AC024230.1      | 0.318197761 mirna_lnc |
| 29735 hsa-mir-301b | AL031985.3      | 0.350563405 mirna_lnc |
| 29736 hsa-mir-301b | AC013400.1      | 0.517828424 mirna_lnc |
| 29737 hsa-mir-301b | AC138904.1      | 0.321747645 mirna_lnc |
| 29738 hsa-mir-301b | LINC01424       | 0.498866308 mirna_lnc |
| 29739 hsa-mir-301b | TBC1D8-AS1      | 0.565615043 mirna_lnc |
| 29740 hsa-mir-301b | AP000487.1      | 0.301721614 mirna_lnc |
| 29741 hsa-mir-301b | KIAA1614-AS1    | 0.462139793 mirna_lnc |
| 29742 hsa-mir-301b | AC016876.3      | 0.628483198 mirna_lnc |
| 29743 hsa-mir-301b | AL031665.2      | 0.395957071 mirna_lnc |
| 29744 hsa-mir-301b | AL163051.1      | 0.3711727 mirna_lnc   |
| 29745 hsa-mir-301b | AL513327.2      | 0.635896286 mirna_lnc |
| 29746 hsa-mir-301b | IQCJ-SCHIP1-AS1 | 0.393991029 mirna_lnc |
| 29747 hsa-mir-301b | AC084125.2      | 0.35454715 mirna_lnc  |
| 29748 hsa-mir-301b | AC138356.1      | 0.630651627 mirna_lnc |
| 29749 hsa-mir-301b | LINC01456       | 0.347124786 mirna_lnc |
| 29750 hsa-mir-301b | AC092807.2      | 0.420600614 mirna_lnc |
| 29751 hsa-mir-301b | LINC01850       | 0.405569242 mirna_lnc |
| 29752 hsa-mir-301b | LINC01357       | 0.345609437 mirna_lnc |
| 29753 hsa-mir-301b | AL683887.1      | 0.362959732 mirna_lnc |

|                    |             |                       |
|--------------------|-------------|-----------------------|
| 29754 hsa-mir-301b | AP000593.3  | 0.380891749 mirna_lnc |
| 29755 hsa-mir-301b | WWTR1-AS1   | 0.349245361 mirna_lnc |
| 29756 hsa-mir-301b | LINC01686   | 0.486487408 mirna_lnc |
| 29757 hsa-mir-301b | MIR583HG    | 0.390789047 mirna_lnc |
| 29758 hsa-mir-301b | LINC01143   | 0.325153144 mirna_lnc |
| 29759 hsa-mir-301b | AL033527.3  | 0.316947836 mirna_lnc |
| 29760 hsa-mir-301b | AC002550.1  | 0.31536885 mirna_lnc  |
| 29761 hsa-mir-301b | AC010595.1  | 0.337516887 mirna_lnc |
| 29762 hsa-mir-301b | LINC02607   | 0.663954973 mirna_lnc |
| 29763 hsa-mir-301b | WASIR2      | 0.309354001 mirna_lnc |
| 29764 hsa-mir-301b | LINC01816   | 0.695496157 mirna_lnc |
| 29765 hsa-mir-301b | AL121652.1  | 0.345893 mirna_lnc    |
| 29766 hsa-mir-301b | SREBF2-AS1  | 0.415691461 mirna_lnc |
| 29767 hsa-mir-301b | AC099518.6  | 0.626388805 mirna_lnc |
| 29768 hsa-mir-301b | AC007881.3  | 0.531103879 mirna_lnc |
| 29769 hsa-mir-301b | AL121658.1  | 0.42355364 mirna_lnc  |
| 29770 hsa-mir-301b | AC010969.2  | 0.406327416 mirna_lnc |
| 29771 hsa-mir-301b | AC022098.3  | 0.448686103 mirna_lnc |
| 29772 hsa-mir-301b | AC005332.1  | 0.327617318 mirna_lnc |
| 29773 hsa-mir-301b | LINC00167   | 0.634864412 mirna_lnc |
| 29774 hsa-mir-301b | AC011825.4  | 0.304618905 mirna_lnc |
| 29775 hsa-mir-301b | AC011297.1  | 0.307780768 mirna_lnc |
| 29776 hsa-mir-301b | AC023302.1  | 0.331757869 mirna_lnc |
| 29777 hsa-mir-301b | AC004943.3  | 0.353126155 mirna_lnc |
| 29778 hsa-mir-301b | AC046143.2  | 0.486652368 mirna_lnc |
| 29779 hsa-mir-301b | AC145343.1  | 0.570508245 mirna_lnc |
| 29780 hsa-mir-301b | AC112907.1  | 0.311748349 mirna_lnc |
| 29781 hsa-mir-301b | AL121992.2  | 0.351194775 mirna_lnc |
| 29782 hsa-mir-301b | AC093424.1  | 0.586718357 mirna_lnc |
| 29783 hsa-mir-301b | AC091925.1  | 0.341318281 mirna_lnc |
| 29784 hsa-mir-301b | AC117382.2  | 0.559850084 mirna_lnc |
| 29785 hsa-mir-301b | AC091153.3  | 0.401730145 mirna_lnc |
| 29786 hsa-mir-301b | AC063948.1  | 0.463082827 mirna_lnc |
| 29787 hsa-mir-301b | AC087742.1  | 0.420518091 mirna_lnc |
| 29788 hsa-mir-301b | AL354892.2  | 0.422421043 mirna_lnc |
| 29789 hsa-mir-301b | AC015802.5  | 0.376285339 mirna_lnc |
| 29790 hsa-mir-301b | AL139327.2  | 0.500750453 mirna_lnc |
| 29791 hsa-mir-301b | DDX39B-AS1  | 0.422480571 mirna_lnc |
| 29792 hsa-mir-301b | AC069148.1  | 0.406309683 mirna_lnc |
| 29793 hsa-mir-301b | AC106820.2  | 0.316416868 mirna_lnc |
| 29794 hsa-mir-301b | AC005993.1  | 0.335319563 mirna_lnc |
| 29795 hsa-mir-301b | AC026271.3  | 0.329517675 mirna_lnc |
| 29796 hsa-mir-301b | AC016205.1  | 0.306452368 mirna_lnc |
| 29797 hsa-mir-301b | AC064836.3  | 0.429204222 mirna_lnc |
| 29798 hsa-mir-301b | BX088651.4  | 0.38845682 mirna_lnc  |
| 29799 hsa-mir-301b | AC025211.1  | 0.353987609 mirna_lnc |
| 29800 hsa-mir-301b | PIK3CD-AS2  | 0.357109312 mirna_lnc |
| 29801 hsa-mir-301b | AC012640.5  | 0.321425399 mirna_lnc |
| 29802 hsa-mir-301b | AL512408.1  | 0.532263158 mirna_lnc |
| 29803 hsa-mir-301b | AC090527.3  | 0.329673985 mirna_lnc |
| 29804 hsa-mir-301b | MYB-AS1     | 0.324151989 mirna_lnc |
| 29805 hsa-mir-301b | AC087741.2  | 0.339626518 mirna_lnc |
| 29806 hsa-mir-301b | AC010422.2  | 0.380665641 mirna_lnc |
| 29807 hsa-mir-301b | RNASEH1-AS1 | 0.411014444 mirna_lnc |

|                    |             |                        |
|--------------------|-------------|------------------------|
| 29808 hsa-mir-301b | AP002387. 2 | 0. 322031701 mirna_lnc |
| 29809 hsa-mir-301b | AC005379. 1 | 0. 302732016 mirna_lnc |
| 29810 hsa-mir-301b | LINC01063   | 0. 627032282 mirna_lnc |
| 29811 hsa-mir-301b | AC092669. 1 | 0. 545809649 mirna_lnc |
| 29812 hsa-mir-301b | CIRBP-AS1   | 0. 513983625 mirna_lnc |
| 29813 hsa-mir-301b | AP002336. 2 | 0. 347322382 mirna_lnc |
| 29814 hsa-mir-301b | AC069213. 1 | 0. 336081572 mirna_lnc |
| 29815 hsa-mir-301b | AC091946. 2 | 0. 459116082 mirna_lnc |
| 29816 hsa-mir-301b | AL096828. 3 | 0. 312866456 mirna_lnc |
| 29817 hsa-mir-301b | AC084757. 2 | 0. 39256634 mirna_lnc  |
| 29818 hsa-mir-301b | AC040169. 3 | 0. 365023573 mirna_lnc |
| 29819 hsa-mir-301b | EIF2AK3-DT  | 0. 32134655 mirna_lnc  |
| 29820 hsa-mir-301b | AL021920. 1 | 0. 321027889 mirna_lnc |
| 29821 hsa-mir-301b | AC009171. 2 | 0. 481615489 mirna_lnc |
| 29822 hsa-mir-301b | CNNM3-DT    | 0. 394695703 mirna_lnc |
| 29823 hsa-mir-301b | AC068831. 6 | 0. 440841128 mirna_lnc |
| 29824 hsa-mir-301b | AL355482. 2 | 0. 424487441 mirna_lnc |
| 29825 hsa-mir-301b | AC080013. 5 | 0. 372470276 mirna_lnc |
| 29826 hsa-mir-301b | AL645608. 4 | 0. 394139853 mirna_lnc |
| 29827 hsa-mir-301b | LINC02562   | 0. 411511616 mirna_lnc |
| 29828 hsa-mir-301b | AC138696. 2 | 0. 513897344 mirna_lnc |
| 29829 hsa-mir-301b | MAST4-AS1   | 0. 43487012 mirna_lnc  |
| 29830 hsa-mir-301b | AC093585. 1 | 0. 318553547 mirna_lnc |
| 29831 hsa-mir-301b | AC090774. 2 | 0. 310593198 mirna_lnc |
| 29832 hsa-mir-301b | AC007773. 1 | 0. 300721084 mirna_lnc |
| 29833 hsa-mir-301b | AC098818. 2 | 0. 329201611 mirna_lnc |
| 29834 hsa-mir-301b | AC022762. 1 | 0. 365933883 mirna_lnc |
| 29835 hsa-mir-301b | AC090912. 3 | 0. 301763257 mirna_lnc |
| 29836 hsa-mir-301b | AC008267. 5 | 0. 409575049 mirna_lnc |
| 29837 hsa-mir-301b | AC005695. 3 | 0. 348517778 mirna_lnc |
| 29838 hsa-mir-301b | AC107214. 1 | 0. 397058132 mirna_lnc |
| 29839 hsa-mir-301b | LINC00885   | 0. 434293452 mirna_lnc |
| 29840 hsa-mir-301b | AL022324. 3 | 0. 316127772 mirna_lnc |
| 29841 hsa-mir-301b | AC005005. 3 | 0. 474184662 mirna_lnc |
| 29842 hsa-mir-301b | AC073896. 4 | 0. 44938395 mirna_lnc  |
| 29843 hsa-mir-301b | DDR1-DT     | 0. 368072078 mirna_lnc |
| 29844 hsa-mir-301b | AC108865. 1 | 0. 420612257 mirna_lnc |
| 29845 hsa-mir-301b | URB1-AS1    | 0. 370112828 mirna_lnc |
| 29846 hsa-mir-301b | AC024243. 1 | 0. 420706771 mirna_lnc |
| 29847 hsa-mir-301b | AC011446. 1 | 0. 418553166 mirna_lnc |
| 29848 hsa-mir-301b | AL132712. 2 | 0. 376281172 mirna_lnc |
| 29849 hsa-mir-301b | AC008736. 2 | 0. 512707461 mirna_lnc |
| 29850 hsa-mir-301b | AC091271. 1 | 0. 374198038 mirna_lnc |
| 29851 hsa-mir-301b | AL590399. 1 | 0. 442018522 mirna_lnc |
| 29852 hsa-mir-301b | AC026304. 1 | 0. 408273773 mirna_lnc |
| 29853 hsa-mir-301b | AC096992. 2 | 0. 458267668 mirna_lnc |
| 29854 hsa-mir-301b | LPP-AS2     | 0. 303969078 mirna_lnc |
| 29855 hsa-mir-301b | AC005304. 3 | 0. 382601986 mirna_lnc |
| 29856 hsa-mir-301b | AC010186. 1 | 0. 58480573 mirna_lnc  |
| 29857 hsa-mir-301b | ELDR        | 0. 621615672 mirna_lnc |
| 29858 hsa-mir-301b | AC090617. 5 | 0. 335812868 mirna_lnc |
| 29859 hsa-mir-301b | AP003170. 3 | 0. 340859809 mirna_lnc |
| 29860 hsa-mir-301b | AC019129. 2 | 0. 414538185 mirna_lnc |
| 29861 hsa-mir-301b | AC005790. 1 | 0. 5212235 mirna_lnc   |

|                    |             |                        |
|--------------------|-------------|------------------------|
| 29862 hsa-mir-301b | AC010336. 2 | 0. 324855829 mirna_lnc |
| 29863 hsa-mir-301b | AP003086. 2 | 0. 359562292 mirna_lnc |
| 29864 hsa-mir-301b | AP001775. 2 | 0. 467484594 mirna_lnc |
| 29865 hsa-mir-301b | AL132712. 1 | 0. 430314234 mirna_lnc |
| 29866 hsa-mir-301b | AC023355. 1 | 0. 391415712 mirna_lnc |
| 29867 hsa-mir-301b | AL606760. 3 | 0. 31130631 mirna_lnc  |
| 29868 hsa-mir-301b | AC093677. 2 | 0. 543343106 mirna_lnc |
| 29869 hsa-mir-301b | Z73429. 1   | 0. 326971384 mirna_lnc |
| 29870 hsa-mir-301b | IQCA1-AS1   | 0. 437422682 mirna_lnc |
| 29871 hsa-mir-301b | INTS6L-AS1  | 0. 425980751 mirna_lnc |
| 29872 hsa-mir-301b | AC083880. 1 | 0. 451177097 mirna_lnc |
| 29873 hsa-mir-301b | AL121601. 1 | 0. 337811558 mirna_lnc |
| 29874 hsa-mir-301b | AP001547. 1 | 0. 37296472 mirna_lnc  |
| 29875 hsa-mir-301b | LINC01607   | 0. 53434304 mirna_lnc  |
| 29876 hsa-mir-301b | AL161729. 2 | 0. 365246712 mirna_lnc |
| 29877 hsa-mir-301b | AC007389. 5 | 0. 566942562 mirna_lnc |
| 29878 hsa-mir-301b | AC108865. 2 | 0. 620322771 mirna_lnc |
| 29879 hsa-mir-301b | AC010834. 2 | 0. 512504057 mirna_lnc |
| 29880 hsa-mir-301b | AL022341. 1 | 0. 379118423 mirna_lnc |
| 29881 hsa-mir-301b | AP000251. 1 | 0. 597983442 mirna_lnc |
| 29882 hsa-mir-301b | AL390195. 1 | 0. 386104823 mirna_lnc |
| 29883 hsa-mir-301b | AC025575. 2 | 0. 395574365 mirna_lnc |
| 29884 hsa-mir-301b | BX005266. 2 | 0. 363755632 mirna_lnc |
| 29885 hsa-mir-301b | CPNE8-AS1   | 0. 395379426 mirna_lnc |
| 29886 hsa-mir-301b | AC118658. 1 | 0. 37459303 mirna_lnc  |
| 29887 hsa-mir-301b | AL138881. 1 | 0. 596262144 mirna_lnc |
| 29888 hsa-mir-301b | AC087276. 3 | 0. 392807468 mirna_lnc |
| 29889 hsa-mir-301b | AC090907. 1 | 0. 553802904 mirna_lnc |
| 29890 hsa-mir-301b | AC093635. 1 | 0. 442518393 mirna_lnc |
| 29891 hsa-mir-301b | LINC01715   | 0. 55873348 mirna_lnc  |
| 29892 hsa-mir-301b | AL603839. 3 | 0. 36889469 mirna_lnc  |
| 29893 hsa-mir-301b | AC009560. 1 | 0. 413959893 mirna_lnc |
| 29894 hsa-mir-301b | AL590822. 1 | 0. 513641808 mirna_lnc |
| 29895 hsa-mir-301b | BRWD1-AS2   | 0. 327431598 mirna_lnc |
| 29896 hsa-mir-301b | LINC01144   | 0. 305163859 mirna_lnc |
| 29897 hsa-mir-301b | AC016405. 2 | 0. 333322465 mirna_lnc |
| 29898 hsa-mir-301b | AL157813. 1 | 0. 324878867 mirna_lnc |
| 29899 hsa-mir-301b | AC009275. 1 | 0. 312180922 mirna_lnc |
| 29900 hsa-mir-301b | AC027644. 3 | 0. 440164349 mirna_lnc |
| 29901 hsa-mir-301b | AGBL5-AS1   | 0. 36404054 mirna_lnc  |
| 29902 hsa-mir-301b | AC079174. 2 | 0. 300595902 mirna_lnc |
| 29903 hsa-mir-301b | AC004263. 1 | 0. 350366902 mirna_lnc |
| 29904 hsa-mir-301b | AC007114. 1 | 0. 410562273 mirna_lnc |
| 29905 hsa-mir-301b | AC018682. 2 | 0. 306614905 mirna_lnc |
| 29906 hsa-mir-301b | AC096540. 1 | 0. 340503822 mirna_lnc |
| 29907 hsa-mir-301b | SCAT8       | 0. 627967043 mirna_lnc |
| 29908 hsa-mir-301b | AL356488. 3 | 0. 482279203 mirna_lnc |
| 29909 hsa-mir-301b | AP000692. 2 | 0. 349230821 mirna_lnc |
| 29910 hsa-mir-301b | AC004969. 1 | 0. 362694204 mirna_lnc |
| 29911 hsa-mir-301b | AC069277. 1 | 0. 316815658 mirna_lnc |
| 29912 hsa-mir-301b | AL032819. 1 | 0. 563392918 mirna_lnc |
| 29913 hsa-mir-301b | AL844908. 2 | 0. 452261889 mirna_lnc |
| 29914 hsa-mir-301b | AC092119. 3 | 0. 391003384 mirna_lnc |
| 29915 hsa-mir-301b | AC069307. 1 | 0. 467718406 mirna_lnc |

|                    |             |                       |
|--------------------|-------------|-----------------------|
| 29916 hsa-mir-301b | AC099343.3  | 0.315934275 mirna_lnc |
| 29917 hsa-mir-301b | AC079834.2  | 0.388603103 mirna_lnc |
| 29918 hsa-mir-301b | HDAC4-AS1   | 0.443605689 mirna_lnc |
| 29919 hsa-mir-301b | ESRG        | 0.367485554 mirna_lnc |
| 29920 hsa-mir-301b | AL021154.1  | 0.543220649 mirna_lnc |
| 29921 hsa-mir-301b | AL359198.1  | 0.376474205 mirna_lnc |
| 29922 hsa-mir-301b | AC004012.1  | 0.643824539 mirna_lnc |
| 29923 hsa-mir-301b | AL118511.1  | 0.304719865 mirna_lnc |
| 29924 hsa-mir-301b | AC087276.1  | 0.422144899 mirna_lnc |
| 29925 hsa-mir-301b | AC090739.1  | 0.338899959 mirna_lnc |
| 29926 hsa-mir-301b | AL583808.1  | 0.504991754 mirna_lnc |
| 29927 hsa-mir-301b | AC068620.2  | 0.301444775 mirna_lnc |
| 29928 hsa-mir-301b | AP003392.3  | 0.393537707 mirna_lnc |
| 29929 hsa-mir-301b | AC005034.4  | 0.3117946 mirna_lnc   |
| 29930 hsa-mir-301b | Z93241.1    | 0.455492387 mirna_lnc |
| 29931 hsa-mir-301b | AL627171.1  | 0.342424014 mirna_lnc |
| 29932 hsa-mir-301b | AL359878.2  | 0.463678302 mirna_lnc |
| 29933 hsa-mir-301b | LINC02470   | 0.373726317 mirna_lnc |
| 29934 hsa-mir-301b | AC068338.2  | 0.31481741 mirna_lnc  |
| 29935 hsa-mir-301b | AL731537.1  | 0.565652501 mirna_lnc |
| 29936 hsa-mir-301b | GTSE1-DT    | 0.353548553 mirna_lnc |
| 29937 hsa-mir-301b | AC135178.5  | 0.504295749 mirna_lnc |
| 29938 hsa-mir-301b | KCNJ2-AS1   | 0.497086078 mirna_lnc |
| 29939 hsa-mir-301b | C8orf37-AS1 | 0.33978942 mirna_lnc  |
| 29940 hsa-mir-301b | AC002059.1  | 0.599961671 mirna_lnc |
| 29941 hsa-mir-301b | AL645608.6  | 0.429681143 mirna_lnc |
| 29942 hsa-mir-301b | AC092652.1  | 0.353935219 mirna_lnc |
| 29943 hsa-mir-301b | AC011840.2  | 0.313936697 mirna_lnc |
| 29944 hsa-mir-301b | AC000120.1  | 0.431911821 mirna_lnc |
| 29945 hsa-mir-301b | AC010980.2  | 0.432816478 mirna_lnc |
| 29946 hsa-mir-301b | AL603839.4  | 0.314795851 mirna_lnc |
| 29947 hsa-mir-301b | AC025162.2  | 0.316709793 mirna_lnc |
| 29948 hsa-mir-301b | PARD3-AS1   | 0.351167312 mirna_lnc |
| 29949 hsa-mir-301b | AC136604.3  | 0.413375746 mirna_lnc |
| 29950 hsa-mir-301b | AC005197.1  | 0.400834628 mirna_lnc |
| 29951 hsa-mir-301b | AC145423.2  | 0.328352782 mirna_lnc |
| 29952 hsa-mir-301b | AC092142.1  | 0.497976297 mirna_lnc |
| 29953 hsa-mir-301b | CYP51A1-AS1 | 0.580691734 mirna_lnc |
| 29954 hsa-mir-301b | AC005696.4  | 0.455097728 mirna_lnc |
| 29955 hsa-mir-301b | AL512791.2  | 0.425974561 mirna_lnc |
| 29956 hsa-mir-301b | AP001893.3  | 0.34925452 mirna_lnc  |
| 29957 hsa-mir-301b | RN7SL832P   | 0.486314223 mirna_lnc |
| 29958 hsa-mir-301b | AC008555.2  | 0.321728649 mirna_lnc |
| 29959 hsa-mir-301b | AL138966.2  | 0.346919307 mirna_lnc |
| 29960 hsa-mir-301b | AL358933.1  | 0.353702645 mirna_lnc |
| 29961 hsa-mir-301b | AP001922.5  | 0.3081601 mirna_lnc   |
| 29962 hsa-mir-301b | AC084819.1  | 0.384510626 mirna_lnc |
| 29963 hsa-mir-301b | AL512598.1  | 0.335640846 mirna_lnc |
| 29964 hsa-mir-301b | LINC00112   | 0.371511143 mirna_lnc |
| 29965 hsa-mir-301b | AP001972.4  | 0.394757026 mirna_lnc |
| 29966 hsa-mir-301b | AL590705.3  | 0.650698978 mirna_lnc |
| 29967 hsa-mir-301b | AC099684.1  | 0.327088974 mirna_lnc |
| 29968 hsa-mir-301b | AC106782.2  | 0.368516892 mirna_lnc |
| 29969 hsa-mir-301b | LINC00900   | 0.333735592 mirna_lnc |

|                    |             |                        |
|--------------------|-------------|------------------------|
| 29970 hsa-mir-301b | AL645608. 2 | 0. 320107243 mirna_lnc |
| 29971 hsa-mir-301b | AC015917. 2 | 0. 364806607 mirna_lnc |
| 29972 hsa-mir-301b | FOXN3-AS1   | 0. 360765214 mirna_lnc |
| 29973 hsa-mir-301b | TOLLIP-AS1  | 0. 385893564 mirna_lnc |
| 29974 hsa-mir-301b | AC021092. 1 | 0. 320142435 mirna_lnc |
| 29975 hsa-mir-301b | AC012676. 3 | 0. 393552699 mirna_lnc |
| 29976 hsa-mir-361  | AC012073. 1 | 0. 372787753 mirna_lnc |
| 29977 hsa-mir-361  | AC020658. 4 | 0. 313806872 mirna_lnc |
| 29978 hsa-mir-361  | HOXC-AS2    | 0. 342587763 mirna_lnc |
| 29979 hsa-mir-361  | AP003071. 2 | 0. 36457816 mirna_lnc  |
| 29980 hsa-mir-361  | AC009121. 2 | 0. 36709978 mirna_lnc  |
| 29981 hsa-mir-361  | PRC1-AS1    | 0. 33457637 mirna_lnc  |
| 29982 hsa-mir-361  | AC008750. 7 | 0. 355527154 mirna_lnc |
| 29983 hsa-mir-361  | AC024884. 2 | 0. 316640608 mirna_lnc |
| 29984 hsa-mir-361  | AC016596. 1 | 0. 303032547 mirna_lnc |
| 29985 hsa-mir-361  | AC130324. 2 | 0. 311217298 mirna_lnc |
| 29986 hsa-mir-361  | AC024230. 1 | 0. 30429622 mirna_lnc  |
| 29987 hsa-mir-361  | LINC01397   | 0. 305003193 mirna_lnc |
| 29988 hsa-mir-361  | AC021483. 1 | 0. 319395276 mirna_lnc |
| 29989 hsa-mir-361  | AC026992. 2 | 0. 349465 mirna_lnc    |
| 29990 hsa-mir-361  | AC018878. 1 | 0. 305126559 mirna_lnc |
| 29991 hsa-mir-361  | AC020612. 3 | 0. 321140965 mirna_lnc |
| 29992 hsa-mir-361  | WASIR2      | 0. 301627566 mirna_lnc |
| 29993 hsa-mir-361  | SREBF2-AS1  | 0. 359903126 mirna_lnc |
| 29994 hsa-mir-361  | AC004943. 3 | 0. 330829211 mirna_lnc |
| 29995 hsa-mir-361  | AC073896. 3 | 0. 361382836 mirna_lnc |
| 29996 hsa-mir-361  | AC126614. 1 | 0. 32417401 mirna_lnc  |
| 29997 hsa-mir-361  | AC090527. 3 | 0. 304553037 mirna_lnc |
| 29998 hsa-mir-361  | AC012435. 2 | 0. 369923202 mirna_lnc |
| 29999 hsa-mir-361  | AL359851. 1 | 0. 31661217 mirna_lnc  |
| 30000 hsa-mir-361  | AC099568. 2 | 0. 305362222 mirna_lnc |
| 30001 hsa-mir-361  | EXTL3-AS1   | 0. 31195923 mirna_lnc  |
| 30002 hsa-mir-361  | AL512413. 1 | 0. 324475042 mirna_lnc |
| 30003 hsa-mir-361  | AL590133. 1 | 0. 341125238 mirna_lnc |
| 30004 hsa-mir-361  | AC105339. 2 | 0. 343096261 mirna_lnc |
| 30005 hsa-mir-361  | AC107214. 1 | 0. 313504447 mirna_lnc |
| 30006 hsa-mir-361  | AP005328. 2 | 0. 327504238 mirna_lnc |
| 30007 hsa-mir-361  | AC026333. 4 | 0. 3209645 mirna_lnc   |
| 30008 hsa-mir-361  | AP003071. 1 | 0. 3091502 mirna_lnc   |
| 30009 hsa-mir-361  | AL603832. 1 | 0. 352331397 mirna_lnc |
| 30010 hsa-mir-361  | AP006621. 5 | 0. 310274025 mirna_lnc |
| 30011 hsa-mir-361  | AL109945. 1 | 0. 32069128 mirna_lnc  |
| 30012 hsa-mir-361  | AC007638. 2 | 0. 326600377 mirna_lnc |
| 30013 hsa-mir-361  | AC055713. 1 | 0. 331573532 mirna_lnc |
| 30014 hsa-mir-361  | AC011700. 1 | 0. 379062851 mirna_lnc |
| 30015 hsa-mir-361  | AL031186. 1 | 0. 300968378 mirna_lnc |
| 30016 hsa-mir-361  | AL731569. 1 | 0. 309830415 mirna_lnc |
| 30017 hsa-mir-361  | AL606537. 1 | 0. 362000657 mirna_lnc |
| 30018 hsa-mir-361  | AC073575. 1 | 0. 312794681 mirna_lnc |
| 30019 hsa-mir-361  | AC022272. 1 | 0. 324088493 mirna_lnc |
| 30020 hsa-mir-361  | AC025219. 1 | 0. 344212939 mirna_lnc |
| 30021 hsa-mir-361  | AC093510. 1 | 0. 315408596 mirna_lnc |
| 30022 hsa-mir-361  | AL138767. 3 | 0. 407875509 mirna_lnc |
| 30023 hsa-mir-361  | AC020663. 1 | 0. 332150217 mirna_lnc |



|                   |            |                       |
|-------------------|------------|-----------------------|
| 30024 hsa-mir-361 | ETV5-AS1   | 0.327580461 mirna_lnc |
| 30025 hsa-mir-361 | AL607028.1 | 0.309950009 mirna_lnc |
| 30026 hsa-mir-361 | AC011481.2 | 0.304723074 mirna_lnc |
| 30027 hsa-mir-361 | AC107068.1 | 0.305416414 mirna_lnc |
| 30028 hsa-mir-361 | AC012370.1 | 0.301713967 mirna_lnc |
| 30029 hsa-mir-361 | AL158070.2 | 0.317151645 mirna_lnc |
| 30030 hsa-mir-361 | LINC02413  | 0.322053604 mirna_lnc |
| 30031 hsa-mir-361 | AC078909.2 | 0.309141065 mirna_lnc |
| 30032 hsa-mir-361 | AL118511.1 | 0.343994757 mirna_lnc |
| 30033 hsa-mir-361 | AL359881.3 | 0.33173991 mirna_lnc  |
| 30034 hsa-mir-361 | AP000808.2 | 0.313166673 mirna_lnc |
| 30035 hsa-mir-361 | AC008443.3 | 0.361594452 mirna_lnc |
| 30036 hsa-mir-361 | AC007608.2 | 0.390770304 mirna_lnc |
| 30037 hsa-mir-361 | LIX1-AS1   | 0.31643153 mirna_lnc  |
| 30038 hsa-mir-361 | AP002992.1 | 0.315124049 mirna_lnc |
| 30039 hsa-mir-361 | AC017104.3 | 0.308653858 mirna_lnc |
| 30040 hsa-mir-361 | AC145422.1 | 0.363447609 mirna_lnc |
| 30041 hsa-mir-361 | AC026765.2 | 0.309021549 mirna_lnc |
| 30042 hsa-mir-361 | AL358115.1 | 0.306862562 mirna_lnc |
| 30043 hsa-mir-361 | AC068987.1 | 0.32810677 mirna_lnc  |
| 30044 hsa-mir-361 | AL021391.1 | 0.361101005 mirna_lnc |
| 30045 hsa-mir-361 | AL596202.1 | 0.355004871 mirna_lnc |
| 30046 hsa-mir-361 | AL590729.1 | 0.329792161 mirna_lnc |
| 30047 hsa-mir-361 | AC007608.4 | 0.371680222 mirna_lnc |
| 30048 hsa-mir-361 | AC004232.3 | 0.309767621 mirna_lnc |
| 30049 hsa-mir-361 | AC008033.3 | 0.357212351 mirna_lnc |
| 30050 hsa-mir-361 | AC021092.1 | 0.311617024 mirna_lnc |
| 30051 hsa-mir-361 | AC114763.2 | 0.309239139 mirna_lnc |
| 30052 hsa-mir-361 | AC114781.2 | 0.364474993 mirna_lnc |
| 30053 hsa-mir-361 | AC108704.1 | 0.343908788 mirna_lnc |
| 30054 hsa-mir-361 | AC090260.1 | 0.32198839 mirna_lnc  |
| 30055 hsa-mir-937 | BLACE      | 0.375929913 mirna_lnc |
| 30056 hsa-mir-937 | AC084125.4 | 0.303035964 mirna_lnc |
| 30057 hsa-mir-937 | AP001453.4 | 0.366467838 mirna_lnc |
| 30058 hsa-mir-937 | AC084809.1 | 0.310166241 mirna_lnc |
| 30059 hsa-mir-937 | TRHDE-AS1  | 0.336134877 mirna_lnc |
| 30060 hsa-mir-937 | HOXA10-AS  | 0.366709398 mirna_lnc |
| 30061 hsa-mir-937 | RHPN1-AS1  | 0.318667456 mirna_lnc |
| 30062 hsa-mir-937 | AC233992.3 | 0.499007827 mirna_lnc |
| 30063 hsa-mir-937 | AC068228.1 | 0.303998647 mirna_lnc |
| 30064 hsa-mir-937 | AC067930.5 | 0.482266697 mirna_lnc |
| 30065 hsa-mir-937 | AC084125.2 | 0.311725023 mirna_lnc |
| 30066 hsa-mir-937 | AC006372.3 | 0.405108883 mirna_lnc |
| 30067 hsa-mir-937 | AC105219.4 | 0.418567963 mirna_lnc |
| 30068 hsa-mir-937 | AC113194.1 | 0.329874776 mirna_lnc |
| 30069 hsa-mir-937 | AP003559.1 | 0.308374235 mirna_lnc |
| 30070 hsa-mir-937 | AC006262.2 | 0.385291978 mirna_lnc |
| 30071 hsa-mir-937 | SATB2-AS1  | 0.537053162 mirna_lnc |
| 30072 hsa-mir-937 | AC006372.1 | 0.400944603 mirna_lnc |
| 30073 hsa-mir-937 | AC067930.4 | 0.352877326 mirna_lnc |
| 30074 hsa-mir-937 | AC025211.1 | 0.31012275 mirna_lnc  |
| 30075 hsa-mir-937 | AC090164.2 | 0.364777777 mirna_lnc |
| 30076 hsa-mir-937 | AC100803.1 | 0.339413473 mirna_lnc |
| 30077 hsa-mir-937 | AL138916.1 | 0.33766841 mirna_lnc  |

|                   |             |                       |
|-------------------|-------------|-----------------------|
| 30078 hsa-mir-937 | AC008080.1  | 0.316114675 mirna_lnc |
| 30079 hsa-mir-937 | AP003774.4  | 0.310078881 mirna_lnc |
| 30080 hsa-mir-937 | AL353150.1  | 0.408332848 mirna_lnc |
| 30081 hsa-mir-937 | KLHL7-DT    | 0.318193117 mirna_lnc |
| 30082 hsa-mir-937 | AC137894.1  | 0.318863823 mirna_lnc |
| 30083 hsa-mir-937 | AC083841.1  | 0.301418973 mirna_lnc |
| 30084 hsa-mir-937 | AP000317.1  | 0.311064001 mirna_lnc |
| 30085 hsa-mir-937 | AC104076.1  | 0.396037115 mirna_lnc |
| 30086 hsa-mir-17  | AC012073.1  | 0.379970606 mirna_lnc |
| 30087 hsa-mir-17  | AL137060.1  | 0.316352758 mirna_lnc |
| 30088 hsa-mir-17  | AC010761.2  | 0.300391904 mirna_lnc |
| 30089 hsa-mir-17  | TMPO-AS1    | 0.337188971 mirna_lnc |
| 30090 hsa-mir-17  | AL035461.2  | 0.339044942 mirna_lnc |
| 30091 hsa-mir-17  | AL138759.1  | 0.353282922 mirna_lnc |
| 30092 hsa-mir-17  | DDX11-AS1   | 0.37886469 mirna_lnc  |
| 30093 hsa-mir-17  | AL161891.1  | 0.545233488 mirna_lnc |
| 30094 hsa-mir-17  | AC092614.1  | 0.356504143 mirna_lnc |
| 30095 hsa-mir-17  | HOXC-AS2    | 0.350675061 mirna_lnc |
| 30096 hsa-mir-17  | AC019069.1  | 0.320104881 mirna_lnc |
| 30097 hsa-mir-17  | AC021945.1  | 0.356402352 mirna_lnc |
| 30098 hsa-mir-17  | AC025176.1  | 0.331588136 mirna_lnc |
| 30099 hsa-mir-17  | AC090844.3  | 0.34677705 mirna_lnc  |
| 30100 hsa-mir-17  | AC090159.1  | 0.356174568 mirna_lnc |
| 30101 hsa-mir-17  | STK24-AS1   | 0.314889533 mirna_lnc |
| 30102 hsa-mir-17  | AC024940.6  | 0.351027602 mirna_lnc |
| 30103 hsa-mir-17  | AC015849.5  | 0.310823532 mirna_lnc |
| 30104 hsa-mir-17  | LINC01096   | 0.317116442 mirna_lnc |
| 30105 hsa-mir-17  | AC012360.3  | 0.305074873 mirna_lnc |
| 30106 hsa-mir-17  | AL139089.1  | 0.364021491 mirna_lnc |
| 30107 hsa-mir-17  | AL161772.1  | 0.361878004 mirna_lnc |
| 30108 hsa-mir-17  | AC004080.1  | 0.351028816 mirna_lnc |
| 30109 hsa-mir-17  | AC024230.1  | 0.301258374 mirna_lnc |
| 30110 hsa-mir-17  | AC138904.1  | 0.410922319 mirna_lnc |
| 30111 hsa-mir-17  | AL591846.2  | 0.323898258 mirna_lnc |
| 30112 hsa-mir-17  | AC004943.1  | 0.321983153 mirna_lnc |
| 30113 hsa-mir-17  | LINC01460   | 0.377696594 mirna_lnc |
| 30114 hsa-mir-17  | LINC01357   | 0.364266822 mirna_lnc |
| 30115 hsa-mir-17  | LINC01686   | 0.314996251 mirna_lnc |
| 30116 hsa-mir-17  | TRPM2-AS    | 0.349949394 mirna_lnc |
| 30117 hsa-mir-17  | AC004943.3  | 0.319789107 mirna_lnc |
| 30118 hsa-mir-17  | DNAJC3-DT   | 0.341545844 mirna_lnc |
| 30119 hsa-mir-17  | AL354892.2  | 0.322214612 mirna_lnc |
| 30120 hsa-mir-17  | AC026271.3  | 0.347701127 mirna_lnc |
| 30121 hsa-mir-17  | AC016205.1  | 0.384031228 mirna_lnc |
| 30122 hsa-mir-17  | PIK3CD-AS2  | 0.372597703 mirna_lnc |
| 30123 hsa-mir-17  | MYB-AS1     | 0.319660566 mirna_lnc |
| 30124 hsa-mir-17  | AC007128.1  | 0.37355215 mirna_lnc  |
| 30125 hsa-mir-17  | RNASEH1-AS1 | 0.457455156 mirna_lnc |
| 30126 hsa-mir-17  | AC087491.1  | 0.347603955 mirna_lnc |
| 30127 hsa-mir-17  | AC005224.1  | 0.340933991 mirna_lnc |
| 30128 hsa-mir-17  | AC011773.1  | 0.341573951 mirna_lnc |
| 30129 hsa-mir-17  | AL442128.2  | 0.34361946 mirna_lnc  |
| 30130 hsa-mir-17  | AC145207.5  | 0.316338973 mirna_lnc |
| 30131 hsa-mir-17  | AC007938.3  | 0.380995273 mirna_lnc |

|                    |            |                       |
|--------------------|------------|-----------------------|
| 30132 hsa-mir-17   | AC098818.2 | 0.318219126 mirna_lnc |
| 30133 hsa-mir-17   | MAP3K2-DT  | 0.301093163 mirna_lnc |
| 30134 hsa-mir-17   | AL137244.1 | 0.300033359 mirna_lnc |
| 30135 hsa-mir-17   | AL512652.2 | 0.368638375 mirna_lnc |
| 30136 hsa-mir-17   | AC112255.1 | 0.301367512 mirna_lnc |
| 30137 hsa-mir-17   | MCF2L-AS1  | 0.448432366 mirna_lnc |
| 30138 hsa-mir-17   | AL138767.3 | 0.325419011 mirna_lnc |
| 30139 hsa-mir-17   | AC098936.1 | 0.321230235 mirna_lnc |
| 30140 hsa-mir-17   | AC107068.1 | 0.309825834 mirna_lnc |
| 30141 hsa-mir-17   | AL118511.1 | 0.37424431 mirna_lnc  |
| 30142 hsa-mir-17   | AC106820.4 | 0.391929815 mirna_lnc |
| 30143 hsa-mir-17   | LINC02575  | 0.304754488 mirna_lnc |
| 30144 hsa-mir-17   | LINC00449  | 0.327639237 mirna_lnc |
| 30145 hsa-mir-17   | LINC00456  | 0.311997277 mirna_lnc |
| 30146 hsa-mir-17   | AL161729.4 | 0.315347779 mirna_lnc |
| 30147 hsa-mir-17   | PSPC1-AS2  | 0.311167214 mirna_lnc |
| 30148 hsa-mir-301a | AP000708.1 | 0.350663048 mirna_lnc |
| 30149 hsa-mir-301a | LINC02595  | 0.324500965 mirna_lnc |
| 30150 hsa-mir-301a | AL662797.1 | 0.341752532 mirna_lnc |
| 30151 hsa-mir-301a | LINC01873  | 0.399862409 mirna_lnc |
| 30152 hsa-mir-301a | TMPO-AS1   | 0.460273537 mirna_lnc |
| 30153 hsa-mir-301a | AL359513.1 | 0.346461399 mirna_lnc |
| 30154 hsa-mir-301a | AC103591.3 | 0.433790644 mirna_lnc |
| 30155 hsa-mir-301a | AC004241.3 | 0.504796802 mirna_lnc |
| 30156 hsa-mir-301a | AL117332.1 | 0.384379345 mirna_lnc |
| 30157 hsa-mir-301a | CEP83-DT   | 0.380554034 mirna_lnc |
| 30158 hsa-mir-301a | JARID2-AS1 | 0.46333297 mirna_lnc  |
| 30159 hsa-mir-301a | AC106820.3 | 0.312783342 mirna_lnc |
| 30160 hsa-mir-301a | AC074117.1 | 0.353944179 mirna_lnc |
| 30161 hsa-mir-301a | AL031667.3 | 0.490896267 mirna_lnc |
| 30162 hsa-mir-301a | TFAP2A-AS1 | 0.468474457 mirna_lnc |
| 30163 hsa-mir-301a | AC100791.2 | 0.346216295 mirna_lnc |
| 30164 hsa-mir-301a | LINC02542  | 0.370770229 mirna_lnc |
| 30165 hsa-mir-301a | AC092159.2 | 0.336664853 mirna_lnc |
| 30166 hsa-mir-301a | LINC01494  | 0.420760976 mirna_lnc |
| 30167 hsa-mir-301a | AL023803.3 | 0.420445739 mirna_lnc |
| 30168 hsa-mir-301a | AC017083.1 | 0.338719032 mirna_lnc |
| 30169 hsa-mir-301a | AL121655.1 | 0.463310563 mirna_lnc |
| 30170 hsa-mir-301a | AC009121.1 | 0.347283501 mirna_lnc |
| 30171 hsa-mir-301a | AC109322.1 | 0.385351432 mirna_lnc |
| 30172 hsa-mir-301a | LINC01952  | 0.301822862 mirna_lnc |
| 30173 hsa-mir-301a | AC074351.1 | 0.390695383 mirna_lnc |
| 30174 hsa-mir-301a | AL445072.1 | 0.352886348 mirna_lnc |
| 30175 hsa-mir-301a | AC108134.2 | 0.301033218 mirna_lnc |
| 30176 hsa-mir-301a | AC079907.1 | 0.318537096 mirna_lnc |
| 30177 hsa-mir-301a | AC023157.3 | 0.308170444 mirna_lnc |
| 30178 hsa-mir-301a | AC064807.1 | 0.358455402 mirna_lnc |
| 30179 hsa-mir-301a | AL137802.2 | 0.361826215 mirna_lnc |
| 30180 hsa-mir-301a | AC087289.3 | 0.359449238 mirna_lnc |
| 30181 hsa-mir-301a | AL136162.1 | 0.519538025 mirna_lnc |
| 30182 hsa-mir-301a | LINC02367  | 0.346702017 mirna_lnc |
| 30183 hsa-mir-301a | AC073195.1 | 0.411919339 mirna_lnc |
| 30184 hsa-mir-301a | AC015818.2 | 0.37001179 mirna_lnc  |
| 30185 hsa-mir-301a | AL596094.1 | 0.400953115 mirna_lnc |

|                    |                 |                       |
|--------------------|-----------------|-----------------------|
| 30186 hsa-mir-301a | AC004069.1      | 0.491689318 mirna_lnc |
| 30187 hsa-mir-301a | LINC01096       | 0.371432872 mirna_lnc |
| 30188 hsa-mir-301a | AC131025.1      | 0.312323508 mirna_lnc |
| 30189 hsa-mir-301a | AC078788.1      | 0.378433512 mirna_lnc |
| 30190 hsa-mir-301a | AC004920.1      | 0.47971955 mirna_lnc  |
| 30191 hsa-mir-301a | AC021683.3      | 0.504963004 mirna_lnc |
| 30192 hsa-mir-301a | AC010359.1      | 0.325838452 mirna_lnc |
| 30193 hsa-mir-301a | AL391069.2      | 0.374275896 mirna_lnc |
| 30194 hsa-mir-301a | AC012640.2      | 0.462045238 mirna_lnc |
| 30195 hsa-mir-301a | AC090970.2      | 0.37463806 mirna_lnc  |
| 30196 hsa-mir-301a | AC026782.2      | 0.41738232 mirna_lnc  |
| 30197 hsa-mir-301a | AC116049.2      | 0.42186134 mirna_lnc  |
| 30198 hsa-mir-301a | AP003119.2      | 0.419386201 mirna_lnc |
| 30199 hsa-mir-301a | YTHDF3-AS1      | 0.310367315 mirna_lnc |
| 30200 hsa-mir-301a | AL513497.1      | 0.315552182 mirna_lnc |
| 30201 hsa-mir-301a | AC025244.1      | 0.323702623 mirna_lnc |
| 30202 hsa-mir-301a | AC012625.1      | 0.318094043 mirna_lnc |
| 30203 hsa-mir-301a | AL353764.1      | 0.419171106 mirna_lnc |
| 30204 hsa-mir-301a | AC024230.1      | 0.398000883 mirna_lnc |
| 30205 hsa-mir-301a | AC013400.1      | 0.410935332 mirna_lnc |
| 30206 hsa-mir-301a | LINC01424       | 0.451543635 mirna_lnc |
| 30207 hsa-mir-301a | AC022211.4      | 0.330210248 mirna_lnc |
| 30208 hsa-mir-301a | HOMER3-AS1      | 0.320776474 mirna_lnc |
| 30209 hsa-mir-301a | TBC1D8-AS1      | 0.486136878 mirna_lnc |
| 30210 hsa-mir-301a | AP000487.1      | 0.390280695 mirna_lnc |
| 30211 hsa-mir-301a | KIAA1614-AS1    | 0.423039351 mirna_lnc |
| 30212 hsa-mir-301a | AC016876.3      | 0.473210612 mirna_lnc |
| 30213 hsa-mir-301a | AL163051.1      | 0.374940802 mirna_lnc |
| 30214 hsa-mir-301a | AL513327.2      | 0.491741483 mirna_lnc |
| 30215 hsa-mir-301a | AC104971.1      | 0.315036865 mirna_lnc |
| 30216 hsa-mir-301a | IQCJ-SCHIP1-AS1 | 0.322462735 mirna_lnc |
| 30217 hsa-mir-301a | AC084125.2      | 0.334272136 mirna_lnc |
| 30218 hsa-mir-301a | AC138356.1      | 0.444729081 mirna_lnc |
| 30219 hsa-mir-301a | AC092807.2      | 0.425355026 mirna_lnc |
| 30220 hsa-mir-301a | AC002076.1      | 0.319991655 mirna_lnc |
| 30221 hsa-mir-301a | LINC01850       | 0.406496882 mirna_lnc |
| 30222 hsa-mir-301a | AL683887.1      | 0.327769994 mirna_lnc |
| 30223 hsa-mir-301a | AP000593.3      | 0.359809671 mirna_lnc |
| 30224 hsa-mir-301a | WWTR1-AS1       | 0.329203246 mirna_lnc |
| 30225 hsa-mir-301a | LINC01686       | 0.387686466 mirna_lnc |
| 30226 hsa-mir-301a | MIR583HG        | 0.357214605 mirna_lnc |
| 30227 hsa-mir-301a | AC239799.1      | 0.369002716 mirna_lnc |
| 30228 hsa-mir-301a | AC100782.1      | 0.335686788 mirna_lnc |
| 30229 hsa-mir-301a | CASC9           | 0.350467221 mirna_lnc |
| 30230 hsa-mir-301a | AC010595.1      | 0.398718969 mirna_lnc |
| 30231 hsa-mir-301a | AL391069.3      | 0.334325671 mirna_lnc |
| 30232 hsa-mir-301a | LINC02607       | 0.516258521 mirna_lnc |
| 30233 hsa-mir-301a | WASIR2          | 0.321163107 mirna_lnc |
| 30234 hsa-mir-301a | LINC01816       | 0.525390787 mirna_lnc |
| 30235 hsa-mir-301a | SREBF2-AS1      | 0.361069405 mirna_lnc |
| 30236 hsa-mir-301a | AC099518.6      | 0.476841335 mirna_lnc |
| 30237 hsa-mir-301a | AC007881.3      | 0.424564098 mirna_lnc |
| 30238 hsa-mir-301a | DOCK4-AS1       | 0.30663688 mirna_lnc  |
| 30239 hsa-mir-301a | AL121658.1      | 0.383018061 mirna_lnc |

|                    |            |                       |
|--------------------|------------|-----------------------|
| 30240 hsa-mir-301a | AC010969.2 | 0.364127364 mirna_lnc |
| 30241 hsa-mir-301a | AC022098.3 | 0.411671989 mirna_lnc |
| 30242 hsa-mir-301a | AC005332.1 | 0.304036727 mirna_lnc |
| 30243 hsa-mir-301a | LINC00167  | 0.47264394 mirna_lnc  |
| 30244 hsa-mir-301a | AC100812.1 | 0.393698912 mirna_lnc |
| 30245 hsa-mir-301a | AC004943.3 | 0.380372831 mirna_lnc |
| 30246 hsa-mir-301a | AC046143.2 | 0.360416678 mirna_lnc |
| 30247 hsa-mir-301a | AC145343.1 | 0.456137971 mirna_lnc |
| 30248 hsa-mir-301a | AL121992.2 | 0.328001677 mirna_lnc |
| 30249 hsa-mir-301a | AC093424.1 | 0.421325431 mirna_lnc |
| 30250 hsa-mir-301a | AC091925.1 | 0.372175587 mirna_lnc |
| 30251 hsa-mir-301a | AC117382.2 | 0.472922331 mirna_lnc |
| 30252 hsa-mir-301a | AC091153.3 | 0.416358583 mirna_lnc |
| 30253 hsa-mir-301a | AC063948.1 | 0.336127901 mirna_lnc |
| 30254 hsa-mir-301a | AC087742.1 | 0.414438369 mirna_lnc |
| 30255 hsa-mir-301a | AL354892.2 | 0.38938372 mirna_lnc  |
| 30256 hsa-mir-301a | AC015802.5 | 0.352761087 mirna_lnc |
| 30257 hsa-mir-301a | AL139327.2 | 0.373926471 mirna_lnc |
| 30258 hsa-mir-301a | DDX39B-AS1 | 0.373492362 mirna_lnc |
| 30259 hsa-mir-301a | AL031963.3 | 0.349906695 mirna_lnc |
| 30260 hsa-mir-301a | AC106820.2 | 0.318565834 mirna_lnc |
| 30261 hsa-mir-301a | AC026271.3 | 0.349862747 mirna_lnc |
| 30262 hsa-mir-301a | AC016205.1 | 0.394505984 mirna_lnc |
| 30263 hsa-mir-301a | AC064836.3 | 0.371043399 mirna_lnc |
| 30264 hsa-mir-301a | AC011290.1 | 0.323842251 mirna_lnc |
| 30265 hsa-mir-301a | BX088651.4 | 0.308797397 mirna_lnc |
| 30266 hsa-mir-301a | AC109326.1 | 0.316257307 mirna_lnc |
| 30267 hsa-mir-301a | PIK3CD-AS2 | 0.301006466 mirna_lnc |
| 30268 hsa-mir-301a | AC012640.5 | 0.330872943 mirna_lnc |
| 30269 hsa-mir-301a | AL512408.1 | 0.565998981 mirna_lnc |
| 30270 hsa-mir-301a | AC090527.3 | 0.329662325 mirna_lnc |
| 30271 hsa-mir-301a | AC087741.2 | 0.405170501 mirna_lnc |
| 30272 hsa-mir-301a | AL353719.1 | 0.319251637 mirna_lnc |
| 30273 hsa-mir-301a | AC010422.2 | 0.323996089 mirna_lnc |
| 30274 hsa-mir-301a | AC010608.2 | 0.330630667 mirna_lnc |
| 30275 hsa-mir-301a | AP002387.2 | 0.306603291 mirna_lnc |
| 30276 hsa-mir-301a | LINC01063  | 0.500254439 mirna_lnc |
| 30277 hsa-mir-301a | AC092669.1 | 0.457567759 mirna_lnc |
| 30278 hsa-mir-301a | CIRBP-AS1  | 0.400452705 mirna_lnc |
| 30279 hsa-mir-301a | HGC6.3     | 0.306615679 mirna_lnc |
| 30280 hsa-mir-301a | AP002336.2 | 0.410981715 mirna_lnc |
| 30281 hsa-mir-301a | AC091946.2 | 0.384639389 mirna_lnc |
| 30282 hsa-mir-301a | AC115837.2 | 0.315322913 mirna_lnc |
| 30283 hsa-mir-301a | AC084757.2 | 0.329588807 mirna_lnc |
| 30284 hsa-mir-301a | AC092171.3 | 0.310704905 mirna_lnc |
| 30285 hsa-mir-301a | AC011773.1 | 0.323189528 mirna_lnc |
| 30286 hsa-mir-301a | AC040169.3 | 0.37895214 mirna_lnc  |
| 30287 hsa-mir-301a | AC009171.2 | 0.395802574 mirna_lnc |
| 30288 hsa-mir-301a | CNNM3-DT   | 0.352055907 mirna_lnc |
| 30289 hsa-mir-301a | HOXC13-AS  | 0.313324243 mirna_lnc |
| 30290 hsa-mir-301a | AC068831.6 | 0.405806428 mirna_lnc |
| 30291 hsa-mir-301a | AL355482.2 | 0.340229866 mirna_lnc |
| 30292 hsa-mir-301a | AC080013.5 | 0.360157891 mirna_lnc |
| 30293 hsa-mir-301a | AL645608.4 | 0.316192234 mirna_lnc |

|                    |            |                       |
|--------------------|------------|-----------------------|
| 30294 hsa-mir-301a | LINC02562  | 0.360611438 mirna_lnc |
| 30295 hsa-mir-301a | AC138696.2 | 0.478936347 mirna_lnc |
| 30296 hsa-mir-301a | AC007448.3 | 0.312825173 mirna_lnc |
| 30297 hsa-mir-301a | MAST4-AS1  | 0.320382253 mirna_lnc |
| 30298 hsa-mir-301a | AC090774.2 | 0.311922253 mirna_lnc |
| 30299 hsa-mir-301a | AC098818.2 | 0.313091077 mirna_lnc |
| 30300 hsa-mir-301a | LINC01807  | 0.363028817 mirna_lnc |
| 30301 hsa-mir-301a | AC022762.1 | 0.301004566 mirna_lnc |
| 30302 hsa-mir-301a | TCF7L1-IT1 | 0.316492325 mirna_lnc |
| 30303 hsa-mir-301a | AC008267.5 | 0.355804011 mirna_lnc |
| 30304 hsa-mir-301a | AC107214.1 | 0.429031059 mirna_lnc |
| 30305 hsa-mir-301a | AC034236.2 | 0.353927558 mirna_lnc |
| 30306 hsa-mir-301a | LINC00885  | 0.383188865 mirna_lnc |
| 30307 hsa-mir-301a | LINC01971  | 0.331729691 mirna_lnc |
| 30308 hsa-mir-301a | AC073896.4 | 0.408617816 mirna_lnc |
| 30309 hsa-mir-301a | AP005328.2 | 0.3107882 mirna_lnc   |
| 30310 hsa-mir-301a | DDR1-DT    | 0.366779158 mirna_lnc |
| 30311 hsa-mir-301a | AC108865.1 | 0.356466082 mirna_lnc |
| 30312 hsa-mir-301a | URB1-AS1   | 0.325219618 mirna_lnc |
| 30313 hsa-mir-301a | AC024243.1 | 0.331944934 mirna_lnc |
| 30314 hsa-mir-301a | AC011446.1 | 0.438501554 mirna_lnc |
| 30315 hsa-mir-301a | AC008736.2 | 0.38977524 mirna_lnc  |
| 30316 hsa-mir-301a | AC091271.1 | 0.384442378 mirna_lnc |
| 30317 hsa-mir-301a | AL590399.1 | 0.319441707 mirna_lnc |
| 30318 hsa-mir-301a | AC026304.1 | 0.382002224 mirna_lnc |
| 30319 hsa-mir-301a | AC096992.2 | 0.402408837 mirna_lnc |
| 30320 hsa-mir-301a | LPP-AS2    | 0.340573513 mirna_lnc |
| 30321 hsa-mir-301a | AC010186.1 | 0.42678237 mirna_lnc  |
| 30322 hsa-mir-301a | ELDR       | 0.543657081 mirna_lnc |
| 30323 hsa-mir-301a | AC090617.5 | 0.318878009 mirna_lnc |
| 30324 hsa-mir-301a | AC019129.2 | 0.371054568 mirna_lnc |
| 30325 hsa-mir-301a | AC005790.1 | 0.422529939 mirna_lnc |
| 30326 hsa-mir-301a | AL359091.5 | 0.376560056 mirna_lnc |
| 30327 hsa-mir-301a | AP003086.2 | 0.304655638 mirna_lnc |
| 30328 hsa-mir-301a | AP001775.2 | 0.320584241 mirna_lnc |
| 30329 hsa-mir-301a | AL132712.1 | 0.320723867 mirna_lnc |
| 30330 hsa-mir-301a | AC023355.1 | 0.393220244 mirna_lnc |
| 30331 hsa-mir-301a | AL606760.3 | 0.411148255 mirna_lnc |
| 30332 hsa-mir-301a | AC093677.2 | 0.472346765 mirna_lnc |
| 30333 hsa-mir-301a | AC096708.3 | 0.332676935 mirna_lnc |
| 30334 hsa-mir-301a | AC090907.2 | 0.348746211 mirna_lnc |
| 30335 hsa-mir-301a | IQCA1-AS1  | 0.380968711 mirna_lnc |
| 30336 hsa-mir-301a | AC117395.1 | 0.3096726 mirna_lnc   |
| 30337 hsa-mir-301a | INTS6L-AS1 | 0.366756137 mirna_lnc |
| 30338 hsa-mir-301a | AL031432.3 | 0.319610289 mirna_lnc |
| 30339 hsa-mir-301a | AL031186.1 | 0.365590376 mirna_lnc |
| 30340 hsa-mir-301a | AC083880.1 | 0.372507337 mirna_lnc |
| 30341 hsa-mir-301a | AL121601.1 | 0.362743296 mirna_lnc |
| 30342 hsa-mir-301a | AC099522.2 | 0.306774397 mirna_lnc |
| 30343 hsa-mir-301a | AL034399.2 | 0.302665947 mirna_lnc |
| 30344 hsa-mir-301a | AP001547.1 | 0.427867328 mirna_lnc |
| 30345 hsa-mir-301a | LINC01607  | 0.40211093 mirna_lnc  |
| 30346 hsa-mir-301a | LINC01258  | 0.329001443 mirna_lnc |
| 30347 hsa-mir-301a | AC145423.3 | 0.315947195 mirna_lnc |

|                    |            |                       |
|--------------------|------------|-----------------------|
| 30348 hsa-mir-301a | AC046168.1 | 0.312265059 mirna_lnc |
| 30349 hsa-mir-301a | AL136038.3 | 0.314788772 mirna_lnc |
| 30350 hsa-mir-301a | AP000892.1 | 0.333735853 mirna_lnc |
| 30351 hsa-mir-301a | AC007541.1 | 0.321966368 mirna_lnc |
| 30352 hsa-mir-301a | AC007389.5 | 0.437885774 mirna_lnc |
| 30353 hsa-mir-301a | AC108865.2 | 0.466688443 mirna_lnc |
| 30354 hsa-mir-301a | AC010834.2 | 0.429063671 mirna_lnc |
| 30355 hsa-mir-301a | AL022341.1 | 0.364679511 mirna_lnc |
| 30356 hsa-mir-301a | AP000251.1 | 0.526578272 mirna_lnc |
| 30357 hsa-mir-301a | AC025575.2 | 0.358670619 mirna_lnc |
| 30358 hsa-mir-301a | BX005266.2 | 0.310107861 mirna_lnc |
| 30359 hsa-mir-301a | CPNE8-AS1  | 0.332593848 mirna_lnc |
| 30360 hsa-mir-301a | AL355102.4 | 0.301152315 mirna_lnc |
| 30361 hsa-mir-301a | AC118658.1 | 0.310311344 mirna_lnc |
| 30362 hsa-mir-301a | AC005865.1 | 0.316669835 mirna_lnc |
| 30363 hsa-mir-301a | AL138881.1 | 0.445249144 mirna_lnc |
| 30364 hsa-mir-301a | AC090907.1 | 0.461058072 mirna_lnc |
| 30365 hsa-mir-301a | AC093635.1 | 0.361296328 mirna_lnc |
| 30366 hsa-mir-301a | LINC01715  | 0.442802638 mirna_lnc |
| 30367 hsa-mir-301a | AC009560.1 | 0.309586343 mirna_lnc |
| 30368 hsa-mir-301a | AL590822.1 | 0.400120824 mirna_lnc |
| 30369 hsa-mir-301a | AC018553.1 | 0.321822026 mirna_lnc |
| 30370 hsa-mir-301a | AC027644.3 | 0.390297543 mirna_lnc |
| 30371 hsa-mir-301a | AGBL5-AS1  | 0.309081395 mirna_lnc |
| 30372 hsa-mir-301a | AC079174.2 | 0.303503756 mirna_lnc |
| 30373 hsa-mir-301a | ETV5-AS1   | 0.309130165 mirna_lnc |
| 30374 hsa-mir-301a | SCAT8      | 0.470131205 mirna_lnc |
| 30375 hsa-mir-301a | AL356488.3 | 0.489886796 mirna_lnc |
| 30376 hsa-mir-301a | MANEA-DT   | 0.339855614 mirna_lnc |
| 30377 hsa-mir-301a | SEMA6A-AS2 | 0.367049514 mirna_lnc |
| 30378 hsa-mir-301a | AC004969.1 | 0.345629178 mirna_lnc |
| 30379 hsa-mir-301a | AC069277.1 | 0.365692016 mirna_lnc |
| 30380 hsa-mir-301a | AL032819.1 | 0.479067727 mirna_lnc |
| 30381 hsa-mir-301a | AL844908.2 | 0.408140214 mirna_lnc |
| 30382 hsa-mir-301a | AP001783.1 | 0.331100656 mirna_lnc |
| 30383 hsa-mir-301a | AC092119.3 | 0.414358555 mirna_lnc |
| 30384 hsa-mir-301a | AC069307.1 | 0.394396779 mirna_lnc |
| 30385 hsa-mir-301a | AC099343.3 | 0.314671427 mirna_lnc |
| 30386 hsa-mir-301a | AC079834.2 | 0.324636397 mirna_lnc |
| 30387 hsa-mir-301a | AL021154.1 | 0.390987399 mirna_lnc |
| 30388 hsa-mir-301a | AC004012.1 | 0.476057221 mirna_lnc |
| 30389 hsa-mir-301a | AC087276.1 | 0.313971675 mirna_lnc |
| 30390 hsa-mir-301a | AL583808.1 | 0.450605677 mirna_lnc |
| 30391 hsa-mir-301a | AC068620.2 | 0.35918319 mirna_lnc  |
| 30392 hsa-mir-301a | AP003392.3 | 0.379817981 mirna_lnc |
| 30393 hsa-mir-301a | AP005205.3 | 0.313632546 mirna_lnc |
| 30394 hsa-mir-301a | AC005034.4 | 0.377868703 mirna_lnc |
| 30395 hsa-mir-301a | Z93241.1   | 0.354469284 mirna_lnc |
| 30396 hsa-mir-301a | AL359878.2 | 0.361845838 mirna_lnc |
| 30397 hsa-mir-301a | AP000808.2 | 0.339956299 mirna_lnc |
| 30398 hsa-mir-301a | AC068338.2 | 0.300543845 mirna_lnc |
| 30399 hsa-mir-301a | AL731537.1 | 0.415050054 mirna_lnc |
| 30400 hsa-mir-301a | AC135178.5 | 0.37366557 mirna_lnc  |
| 30401 hsa-mir-301a | AC106820.4 | 0.320624152 mirna_lnc |

|       |              |             |             |           |
|-------|--------------|-------------|-------------|-----------|
| 30402 | hsa-mir-301a | KCNJ2-AS1   | 0.336428689 | mirna_lnc |
| 30403 | hsa-mir-301a | TPRG1-AS1   | 0.343404735 | mirna_lnc |
| 30404 | hsa-mir-301a | AC002059.1  | 0.443738043 | mirna_lnc |
| 30405 | hsa-mir-301a | AL645608.6  | 0.323064912 | mirna_lnc |
| 30406 | hsa-mir-301a | AC000120.1  | 0.327659807 | mirna_lnc |
| 30407 | hsa-mir-301a | AC010980.2  | 0.3883337   | mirna_lnc |
| 30408 | hsa-mir-301a | AC025162.2  | 0.311575682 | mirna_lnc |
| 30409 | hsa-mir-301a | AC136604.3  | 0.321934144 | mirna_lnc |
| 30410 | hsa-mir-301a | AC130343.2  | 0.311181762 | mirna_lnc |
| 30411 | hsa-mir-301a | AC005197.1  | 0.37520585  | mirna_lnc |
| 30412 | hsa-mir-301a | AC145422.1  | 0.312755651 | mirna_lnc |
| 30413 | hsa-mir-301a | AC145423.2  | 0.370471634 | mirna_lnc |
| 30414 | hsa-mir-301a | AC092142.1  | 0.344605811 | mirna_lnc |
| 30415 | hsa-mir-301a | CYP51A1-AS1 | 0.456092101 | mirna_lnc |
| 30416 | hsa-mir-301a | AL512791.2  | 0.351906225 | mirna_lnc |
| 30417 | hsa-mir-301a | AP001893.3  | 0.307764894 | mirna_lnc |
| 30418 | hsa-mir-301a | RN7SL832P   | 0.420865266 | mirna_lnc |
| 30419 | hsa-mir-301a | LINC02076   | 0.36526921  | mirna_lnc |
| 30420 | hsa-mir-301a | AL358933.1  | 0.380778197 | mirna_lnc |
| 30421 | hsa-mir-301a | AP001972.4  | 0.35053792  | mirna_lnc |
| 30422 | hsa-mir-301a | AL590705.3  | 0.471960553 | mirna_lnc |
| 30423 | hsa-mir-301a | AC002044.1  | 0.409112921 | mirna_lnc |
| 30424 | hsa-mir-301a | LINC00900   | 0.326047489 | mirna_lnc |
| 30425 | hsa-mir-301a | AC015917.2  | 0.317172284 | mirna_lnc |
| 30426 | hsa-mir-301a | FOXN3-AS1   | 0.308338101 | mirna_lnc |
| 30427 | hsa-mir-301a | TOLLIP-AS1  | 0.318587563 | mirna_lnc |
| 30428 | hsa-mir-301a | AC021092.1  | 0.329755172 | mirna_lnc |
| 30429 | hsa-mir-301a | AC012676.3  | 0.368947921 | mirna_lnc |
| 30430 | hsa-mir-483  | AC020659.1  | 0.459961171 | mirna_lnc |
| 30431 | hsa-mir-483  | LINC00322   | 0.341934855 | mirna_lnc |
| 30432 | hsa-mir-483  | AC093458.1  | 0.487700242 | mirna_lnc |
| 30433 | hsa-mir-483  | AC090709.1  | 0.552937331 | mirna_lnc |
| 30434 | hsa-mir-483  | AC021739.2  | 0.433324449 | mirna_lnc |
| 30435 | hsa-mir-483  | AC013565.1  | 0.356560644 | mirna_lnc |
| 30436 | hsa-mir-483  | AL590708.1  | 0.308718085 | mirna_lnc |
| 30437 | hsa-mir-483  | AC012363.2  | 0.337672168 | mirna_lnc |
| 30438 | hsa-mir-483  | AP000696.1  | 0.505617429 | mirna_lnc |
| 30439 | hsa-mir-483  | AC093458.2  | 0.479921925 | mirna_lnc |
| 30440 | hsa-mir-483  | AC131011.1  | 0.452785769 | mirna_lnc |
| 30441 | hsa-mir-483  | AL162457.2  | 0.605951723 | mirna_lnc |
| 30442 | hsa-mir-483  | AC009646.2  | 0.636406347 | mirna_lnc |
| 30443 | hsa-mir-483  | AL590666.2  | 0.383834011 | mirna_lnc |
| 30444 | hsa-mir-483  | IGF2-AS     | 0.636938483 | mirna_lnc |
| 30445 | hsa-mir-483  | AC099552.4  | 0.350864449 | mirna_lnc |
| 30446 | hsa-mir-483  | AC073592.8  | 0.421768481 | mirna_lnc |
| 30447 | hsa-mir-483  | AC011944.1  | 0.393362647 | mirna_lnc |
| 30448 | hsa-mir-483  | AC078860.1  | 0.39465204  | mirna_lnc |
| 30449 | hsa-mir-483  | AC010266.2  | 0.369848953 | mirna_lnc |
| 30450 | hsa-mir-483  | AC015660.2  | 0.410759371 | mirna_lnc |
| 30451 | hsa-mir-483  | AC007099.1  | 0.68730129  | mirna_lnc |
| 30452 | hsa-mir-483  | AC011444.3  | 0.360479851 | mirna_lnc |
| 30453 | hsa-mir-483  | AC011298.1  | 0.319960412 | mirna_lnc |
| 30454 | hsa-mir-483  | LINC01101   | 0.417302954 | mirna_lnc |
| 30455 | hsa-mir-483  | CHRM3-AS1   | 0.329619318 | mirna_lnc |



|                   |            |                       |
|-------------------|------------|-----------------------|
| 30456 hsa-mir-483 | AC090116.1 | 0.479943848 mirna_lnc |
| 30457 hsa-mir-483 | AL031665.1 | 0.341567838 mirna_lnc |
| 30458 hsa-mir-483 | AC012360.1 | 0.358724628 mirna_lnc |
| 30459 hsa-mir-483 | AP006248.3 | 0.325336375 mirna_lnc |
| 30460 hsa-mir-483 | AC243964.3 | 0.420275385 mirna_lnc |
| 30461 hsa-mir-483 | AC015909.2 | 0.71336776 mirna_lnc  |
| 30462 hsa-mir-483 | AC025166.1 | 0.640940933 mirna_lnc |
| 30463 hsa-mir-483 | AL606537.1 | 0.49683701 mirna_lnc  |
| 30464 hsa-mir-483 | AC010328.1 | 0.638662554 mirna_lnc |
| 30465 hsa-mir-483 | AL590438.1 | 0.558390519 mirna_lnc |
| 30466 hsa-mir-483 | Z98885.2   | 0.447636531 mirna_lnc |
| 30467 hsa-mir-483 | AC078942.1 | 0.417841794 mirna_lnc |
| 30468 hsa-mir-483 | AC100835.1 | 0.32641661 mirna_lnc  |
| 30469 hsa-mir-483 | AC096541.1 | 0.378562979 mirna_lnc |
| 30470 hsa-mir-483 | LINC00622  | 0.394064365 mirna_lnc |
| 30471 hsa-mir-483 | AC022146.2 | 0.423291424 mirna_lnc |
| 30472 hsa-mir-483 | AC005586.1 | 0.45387349 mirna_lnc  |
| 30473 hsa-mir-483 | TTLL10-AS1 | 0.429203174 mirna_lnc |
| 30474 hsa-mir-483 | AC021739.5 | 0.525358735 mirna_lnc |
| 30475 hsa-mir-483 | AC021739.3 | 0.625138062 mirna_lnc |
| 30476 hsa-mir-483 | AC016168.3 | 0.357296007 mirna_lnc |
| 30477 hsa-mir-483 | AL360268.1 | 0.411048772 mirna_lnc |
| 30478 hsa-mir-483 | AC100803.3 | 0.421795698 mirna_lnc |
| 30479 hsa-mir-483 | AL163953.1 | 0.495832254 mirna_lnc |
| 30480 hsa-mir-483 | AP006248.4 | 0.376082458 mirna_lnc |
| 30481 hsa-mir-483 | LINC02244  | 0.301864414 mirna_lnc |
| 30482 hsa-mir-483 | AC092301.1 | 0.420468537 mirna_lnc |
| 30483 hsa-mir-483 | AL121832.1 | 0.737364285 mirna_lnc |
| 30484 hsa-mir-483 | AC012467.2 | 0.446780504 mirna_lnc |
| 30485 hsa-mir-483 | AC103681.2 | 0.424210146 mirna_lnc |
| 30486 hsa-mir-483 | AC078820.1 | 0.311741559 mirna_lnc |
| 30487 hsa-mir-483 | AC011447.7 | 0.479489144 mirna_lnc |
| 30488 hsa-mir-483 | CAMTA1-IT1 | 0.459053411 mirna_lnc |
| 30489 hsa-mir-483 | AC109309.1 | 0.636128206 mirna_lnc |
| 30490 hsa-mir-99b | LINC01783  | 0.329818675 mirna_lnc |
| 30491 hsa-mir-99b | AC007193.2 | 0.305817216 mirna_lnc |
| 30492 hsa-mir-99b | ZNF30-AS1  | 0.300692363 mirna_lnc |
| 30493 hsa-mir-99b | AC092667.1 | 0.348256843 mirna_lnc |
| 30494 hsa-mir-99b | AL160286.2 | 0.425864925 mirna_lnc |
| 30495 hsa-mir-99b | TMPO-AS1   | 0.452578837 mirna_lnc |
| 30496 hsa-mir-99b | AP000808.1 | 0.328123459 mirna_lnc |
| 30497 hsa-mir-99b | AL670729.1 | 0.302198382 mirna_lnc |
| 30498 hsa-mir-99b | AL117332.1 | 0.426367419 mirna_lnc |
| 30499 hsa-mir-99b | AC092614.1 | 0.323199397 mirna_lnc |
| 30500 hsa-mir-99b | CEP83-DT   | 0.334350295 mirna_lnc |
| 30501 hsa-mir-99b | HOXC-AS2   | 0.318251133 mirna_lnc |
| 30502 hsa-mir-99b | AC027117.2 | 0.32948466 mirna_lnc  |
| 30503 hsa-mir-99b | AC097532.2 | 0.32403361 mirna_lnc  |
| 30504 hsa-mir-99b | LINC01419  | 0.503908947 mirna_lnc |
| 30505 hsa-mir-99b | AC063977.6 | 0.421749176 mirna_lnc |
| 30506 hsa-mir-99b | LINC00567  | 0.338888704 mirna_lnc |
| 30507 hsa-mir-99b | AC096656.1 | 0.302669811 mirna_lnc |
| 30508 hsa-mir-99b | AC006213.3 | 0.349249178 mirna_lnc |
| 30509 hsa-mir-99b | AP003071.2 | 0.339491245 mirna_lnc |

|                   |              |                        |
|-------------------|--------------|------------------------|
| 30510 hsa-mir-99b | AF233439. 1  | 0. 438275514 mirna_lnc |
| 30511 hsa-mir-99b | LINC01494    | 0. 408615234 mirna_lnc |
| 30512 hsa-mir-99b | AC092803. 2  | 0. 349133782 mirna_lnc |
| 30513 hsa-mir-99b | OCIAD1-AS1   | 0. 303231651 mirna_lnc |
| 30514 hsa-mir-99b | LINC02302    | 0. 41362966 mirna_lnc  |
| 30515 hsa-mir-99b | AC016723. 1  | 0. 455254199 mirna_lnc |
| 30516 hsa-mir-99b | UBE2E1-AS1   | 0. 365922096 mirna_lnc |
| 30517 hsa-mir-99b | AC092111. 1  | 0. 316927323 mirna_lnc |
| 30518 hsa-mir-99b | AL139424. 1  | 0. 377709379 mirna_lnc |
| 30519 hsa-mir-99b | AL133371. 3  | 0. 330843702 mirna_lnc |
| 30520 hsa-mir-99b | LINC01096    | 0. 447943296 mirna_lnc |
| 30521 hsa-mir-99b | AC011481. 4  | 0. 436030356 mirna_lnc |
| 30522 hsa-mir-99b | AC008543. 1  | 0. 368857186 mirna_lnc |
| 30523 hsa-mir-99b | HOXA10-AS    | 0. 387732186 mirna_lnc |
| 30524 hsa-mir-99b | AL391069. 2  | 0. 324230167 mirna_lnc |
| 30525 hsa-mir-99b | AC006116. 10 | 0. 351626497 mirna_lnc |
| 30526 hsa-mir-99b | AC116049. 2  | 0. 47519883 mirna_lnc  |
| 30527 hsa-mir-99b | AL139023. 1  | 0. 322420709 mirna_lnc |
| 30528 hsa-mir-99b | AP000640. 2  | 0. 312556463 mirna_lnc |
| 30529 hsa-mir-99b | AC020928. 2  | 0. 333674203 mirna_lnc |
| 30530 hsa-mir-99b | AL354993. 2  | 0. 385594245 mirna_lnc |
| 30531 hsa-mir-99b | ATP6V1B1-AS1 | 0. 467363245 mirna_lnc |
| 30532 hsa-mir-99b | AJ239322. 1  | 0. 491373147 mirna_lnc |
| 30533 hsa-mir-99b | AC024230. 1  | 0. 4757663 mirna_lnc   |
| 30534 hsa-mir-99b | LINC01397    | 0. 301017421 mirna_lnc |
| 30535 hsa-mir-99b | AL391152. 1  | 0. 418457829 mirna_lnc |
| 30536 hsa-mir-99b | MAGEA4-AS1   | 0. 307394119 mirna_lnc |
| 30537 hsa-mir-99b | AC026992. 2  | 0. 450345669 mirna_lnc |
| 30538 hsa-mir-99b | AC012074. 1  | 0. 320577271 mirna_lnc |
| 30539 hsa-mir-99b | AL358473. 1  | 0. 364386845 mirna_lnc |
| 30540 hsa-mir-99b | AC006486. 2  | 0. 31802173 mirna_lnc  |
| 30541 hsa-mir-99b | AC002076. 1  | 0. 441828659 mirna_lnc |
| 30542 hsa-mir-99b | Z95115. 1    | 0. 371182385 mirna_lnc |
| 30543 hsa-mir-99b | LINC01143    | 0. 320479517 mirna_lnc |
| 30544 hsa-mir-99b | AC022031. 2  | 0. 322974074 mirna_lnc |
| 30545 hsa-mir-99b | LINC01671    | 0. 396697889 mirna_lnc |
| 30546 hsa-mir-99b | AC087273. 2  | 0. 45540743 mirna_lnc  |
| 30547 hsa-mir-99b | AC100782. 1  | 0. 441701289 mirna_lnc |
| 30548 hsa-mir-99b | ARHGAP31-AS1 | 0. 360626324 mirna_lnc |
| 30549 hsa-mir-99b | AC079145. 1  | 0. 362312596 mirna_lnc |
| 30550 hsa-mir-99b | AC010595. 1  | 0. 302674884 mirna_lnc |
| 30551 hsa-mir-99b | TMC01-AS1    | 0. 40429733 mirna_lnc  |
| 30552 hsa-mir-99b | SATB2-AS1    | 0. 406764592 mirna_lnc |
| 30553 hsa-mir-99b | LINC01521    | 0. 311116362 mirna_lnc |
| 30554 hsa-mir-99b | AC100812. 1  | 0. 317528239 mirna_lnc |
| 30555 hsa-mir-99b | AC011297. 1  | 0. 307344056 mirna_lnc |
| 30556 hsa-mir-99b | AC126614. 1  | 0. 396114567 mirna_lnc |
| 30557 hsa-mir-99b | AL121721. 1  | 0. 56577912 mirna_lnc  |
| 30558 hsa-mir-99b | AL354892. 2  | 0. 346408718 mirna_lnc |
| 30559 hsa-mir-99b | AC011773. 4  | 0. 303985174 mirna_lnc |
| 30560 hsa-mir-99b | AC106820. 2  | 0. 322462771 mirna_lnc |
| 30561 hsa-mir-99b | AC026271. 3  | 0. 400802914 mirna_lnc |
| 30562 hsa-mir-99b | AC016205. 1  | 0. 375455592 mirna_lnc |
| 30563 hsa-mir-99b | AC009955. 1  | 0. 303753274 mirna_lnc |

|                   |             |                        |
|-------------------|-------------|------------------------|
| 30564 hsa-mir-99b | AC246793. 1 | 0. 408727449 mirna_lnc |
| 30565 hsa-mir-99b | HGC6. 3     | 0. 393208626 mirna_lnc |
| 30566 hsa-mir-99b | AC107204. 1 | 0. 318594891 mirna_lnc |
| 30567 hsa-mir-99b | AP000525. 1 | 0. 377515864 mirna_lnc |
| 30568 hsa-mir-99b | PCOLCE-AS1  | 0. 35434253 mirna_lnc  |
| 30569 hsa-mir-99b | AP001065. 2 | 0. 374844949 mirna_lnc |
| 30570 hsa-mir-99b | AC092171. 3 | 0. 443464307 mirna_lnc |
| 30571 hsa-mir-99b | FAM66B      | 0. 326165311 mirna_lnc |
| 30572 hsa-mir-99b | AC006213. 5 | 0. 363269484 mirna_lnc |
| 30573 hsa-mir-99b | AC084876. 2 | 0. 30126226 mirna_lnc  |
| 30574 hsa-mir-99b | AC083900. 1 | 0. 424019 mirna_lnc    |
| 30575 hsa-mir-99b | AC068987. 4 | 0. 491885867 mirna_lnc |
| 30576 hsa-mir-99b | AC126407. 1 | 0. 300771202 mirna_lnc |
| 30577 hsa-mir-99b | LINC02177   | 0. 390159833 mirna_lnc |
| 30578 hsa-mir-99b | AL445673. 1 | 0. 383836713 mirna_lnc |
| 30579 hsa-mir-99b | AC012313. 2 | 0. 301254516 mirna_lnc |
| 30580 hsa-mir-99b | AC009271. 1 | 0. 30596134 mirna_lnc  |
| 30581 hsa-mir-99b | AC098818. 2 | 0. 314775949 mirna_lnc |
| 30582 hsa-mir-99b | AL137058. 3 | 0. 52224965 mirna_lnc  |
| 30583 hsa-mir-99b | USP27X-AS1  | 0. 301461734 mirna_lnc |
| 30584 hsa-mir-99b | AC107214. 1 | 0. 31580353 mirna_lnc  |
| 30585 hsa-mir-99b | FAM66E      | 0. 319019745 mirna_lnc |
| 30586 hsa-mir-99b | AP005328. 2 | 0. 518257328 mirna_lnc |
| 30587 hsa-mir-99b | ZNF385D-AS1 | 0. 515716106 mirna_lnc |
| 30588 hsa-mir-99b | AC053527. 1 | 0. 327319669 mirna_lnc |
| 30589 hsa-mir-99b | AP003064. 2 | 0. 404107271 mirna_lnc |
| 30590 hsa-mir-99b | AC093915. 1 | 0. 327533517 mirna_lnc |
| 30591 hsa-mir-99b | AL603832. 1 | 0. 301706401 mirna_lnc |
| 30592 hsa-mir-99b | AL132765. 2 | 0. 301943465 mirna_lnc |
| 30593 hsa-mir-99b | AC011445. 1 | 0. 390744618 mirna_lnc |
| 30594 hsa-mir-99b | LINC01756   | 0. 322951515 mirna_lnc |
| 30595 hsa-mir-99b | AC106895. 2 | 0. 350439175 mirna_lnc |
| 30596 hsa-mir-99b | AC073389. 2 | 0. 38107383 mirna_lnc  |
| 30597 hsa-mir-99b | AL591167. 1 | 0. 411711059 mirna_lnc |
| 30598 hsa-mir-99b | AC007638. 2 | 0. 377201375 mirna_lnc |
| 30599 hsa-mir-99b | AC090907. 2 | 0. 301035061 mirna_lnc |
| 30600 hsa-mir-99b | AC011700. 1 | 0. 323382408 mirna_lnc |
| 30601 hsa-mir-99b | AL031186. 1 | 0. 311723208 mirna_lnc |
| 30602 hsa-mir-99b | AC005052. 1 | 0. 326011185 mirna_lnc |
| 30603 hsa-mir-99b | AL353593. 3 | 0. 34207015 mirna_lnc  |
| 30604 hsa-mir-99b | AC025741. 1 | 0. 301937373 mirna_lnc |
| 30605 hsa-mir-99b | AL590705. 1 | 0. 340138774 mirna_lnc |
| 30606 hsa-mir-99b | AC011450. 1 | 0. 562612531 mirna_lnc |
| 30607 hsa-mir-99b | AC012645. 1 | 0. 422866242 mirna_lnc |
| 30608 hsa-mir-99b | AC145423. 3 | 0. 348418619 mirna_lnc |
| 30609 hsa-mir-99b | AC007541. 1 | 0. 499909058 mirna_lnc |
| 30610 hsa-mir-99b | AC116025. 2 | 0. 388194823 mirna_lnc |
| 30611 hsa-mir-99b | AC034236. 3 | 0. 304845983 mirna_lnc |
| 30612 hsa-mir-99b | WWC2-AS1    | 0. 322545506 mirna_lnc |
| 30613 hsa-mir-99b | ZNF197-AS1  | 0. 300781585 mirna_lnc |
| 30614 hsa-mir-99b | AC243960. 3 | 0. 323210118 mirna_lnc |
| 30615 hsa-mir-99b | AP000317. 1 | 0. 305846369 mirna_lnc |
| 30616 hsa-mir-99b | AL158055. 1 | 0. 327328208 mirna_lnc |
| 30617 hsa-mir-99b | AL138767. 3 | 0. 370074529 mirna_lnc |

|                   |             |                        |
|-------------------|-------------|------------------------|
| 30618 hsa-mir-99b | AC098936. 1 | 0. 320586293 mirna_lnc |
| 30619 hsa-mir-99b | AC138207. 2 | 0. 342349295 mirna_lnc |
| 30620 hsa-mir-99b | AC000036. 1 | 0. 435928316 mirna_lnc |
| 30621 hsa-mir-99b | LINC02148   | 0. 383392799 mirna_lnc |
| 30622 hsa-mir-99b | HCG15       | 0. 495668886 mirna_lnc |
| 30623 hsa-mir-99b | AL162231. 4 | 0. 313965304 mirna_lnc |
| 30624 hsa-mir-99b | ZNF649-AS1  | 0. 349283703 mirna_lnc |
| 30625 hsa-mir-99b | SEMA6A-AS2  | 0. 452411924 mirna_lnc |
| 30626 hsa-mir-99b | AL513327. 3 | 0. 335385849 mirna_lnc |
| 30627 hsa-mir-99b | LINC02365   | 0. 38732148 mirna_lnc  |
| 30628 hsa-mir-99b | AP003774. 1 | 0. 30702892 mirna_lnc  |
| 30629 hsa-mir-99b | MAGEA8-AS1  | 0. 31724016 mirna_lnc  |
| 30630 hsa-mir-99b | LINC00485   | 0. 307850496 mirna_lnc |
| 30631 hsa-mir-99b | AC010501. 1 | 0. 449482671 mirna_lnc |
| 30632 hsa-mir-99b | AC002056. 2 | 0. 300520603 mirna_lnc |
| 30633 hsa-mir-99b | AL118511. 1 | 0. 407314194 mirna_lnc |
| 30634 hsa-mir-99b | AC117402. 1 | 0. 511430079 mirna_lnc |
| 30635 hsa-mir-99b | AC027348. 1 | 0. 517242843 mirna_lnc |
| 30636 hsa-mir-99b | ZFHX4-AS1   | 0. 436761652 mirna_lnc |
| 30637 hsa-mir-99b | AC010524. 1 | 0. 313267787 mirna_lnc |
| 30638 hsa-mir-99b | AC003070. 2 | 0. 445316737 mirna_lnc |
| 30639 hsa-mir-99b | LINC02506   | 0. 344337305 mirna_lnc |
| 30640 hsa-mir-99b | AC005336. 3 | 0. 502345192 mirna_lnc |
| 30641 hsa-mir-99b | GIHCG       | 0. 376291926 mirna_lnc |
| 30642 hsa-mir-99b | AC097504. 2 | 0. 322065954 mirna_lnc |
| 30643 hsa-mir-99b | CEBPA-DT    | 0. 417870862 mirna_lnc |
| 30644 hsa-mir-99b | AC010643. 1 | 0. 380287705 mirna_lnc |
| 30645 hsa-mir-99b | AC022107. 1 | 0. 475552275 mirna_lnc |
| 30646 hsa-mir-99b | AC106820. 4 | 0. 414323605 mirna_lnc |
| 30647 hsa-mir-99b | AC116407. 3 | 0. 321256942 mirna_lnc |
| 30648 hsa-mir-99b | AC026801. 2 | 0. 309109594 mirna_lnc |
| 30649 hsa-mir-99b | AC017100. 1 | 0. 308340432 mirna_lnc |
| 30650 hsa-mir-99b | LINC00471   | 0. 322464646 mirna_lnc |
| 30651 hsa-mir-99b | AC074135. 1 | 0. 379907092 mirna_lnc |
| 30652 hsa-mir-99b | LINC01447   | 0. 32041884 mirna_lnc  |
| 30653 hsa-mir-99b | LIX1-AS1    | 0. 356237743 mirna_lnc |
| 30654 hsa-mir-99b | SPANXA2-OT1 | 0. 568641929 mirna_lnc |
| 30655 hsa-mir-99b | BOLA3-AS1   | 0. 347776924 mirna_lnc |
| 30656 hsa-mir-99b | AC018892. 3 | 0. 302045372 mirna_lnc |
| 30657 hsa-mir-99b | SPACA6P-AS  | 0. 476238678 mirna_lnc |
| 30658 hsa-mir-99b | LINC01918   | 0. 373840116 mirna_lnc |
| 30659 hsa-mir-99b | FAM66A      | 0. 314273478 mirna_lnc |
| 30660 hsa-mir-99b | LINC00909   | 0. 349353579 mirna_lnc |
| 30661 hsa-mir-99b | PTOV1-AS1   | 0. 357421995 mirna_lnc |
| 30662 hsa-mir-99b | LINC02575   | 0. 322409053 mirna_lnc |
| 30663 hsa-mir-99b | AC145422. 1 | 0. 47517193 mirna_lnc  |
| 30664 hsa-mir-99b | AC145423. 2 | 0. 324410164 mirna_lnc |
| 30665 hsa-mir-99b | AC032011. 1 | 0. 339020861 mirna_lnc |
| 30666 hsa-mir-99b | AC107464. 1 | 0. 319564522 mirna_lnc |
| 30667 hsa-mir-99b | WWC2-AS2    | 0. 350634524 mirna_lnc |
| 30668 hsa-mir-99b | AL512604. 2 | 0. 31042252 mirna_lnc  |
| 30669 hsa-mir-99b | AC019193. 2 | 0. 310187178 mirna_lnc |
| 30670 hsa-mir-99b | AL354811. 1 | 0. 324323838 mirna_lnc |
| 30671 hsa-mir-99b | AC068987. 1 | 0. 40770287 mirna_lnc  |

|                    |             |                        |
|--------------------|-------------|------------------------|
| 30672 hsa-mir-99b  | AC061975. 6 | 0. 506837892 mirna_lnc |
| 30673 hsa-mir-99b  | AL662791. 1 | 0. 488289553 mirna_lnc |
| 30674 hsa-mir-99b  | LINC00605   | 0. 340413497 mirna_lnc |
| 30675 hsa-mir-99b  | AC016229. 2 | 0. 397377561 mirna_lnc |
| 30676 hsa-mir-99b  | AP000662. 1 | 0. 473992784 mirna_lnc |
| 30677 hsa-mir-99b  | LINC01099   | 0. 357320776 mirna_lnc |
| 30678 hsa-mir-99b  | GPC6-AS2    | 0. 376332243 mirna_lnc |
| 30679 hsa-mir-99b  | AL132655. 1 | 0. 370826476 mirna_lnc |
| 30680 hsa-mir-99b  | AP001476. 1 | 0. 378622189 mirna_lnc |
| 30681 hsa-mir-99b  | AC010624. 2 | 0. 314776718 mirna_lnc |
| 30682 hsa-mir-99b  | AC006213. 6 | 0. 338568702 mirna_lnc |
| 30683 hsa-mir-99b  | AP001626. 1 | 0. 378902339 mirna_lnc |
| 30684 hsa-mir-99b  | AF213884. 3 | 0. 362360581 mirna_lnc |
| 30685 hsa-mir-99b  | AC021092. 1 | 0. 447783137 mirna_lnc |
| 30686 hsa-mir-99b  | AC127024. 3 | 0. 321100996 mirna_lnc |
| 30687 hsa-mir-99b  | BSN-DT      | 0. 301204055 mirna_lnc |
| 30688 hsa-mir-99b  | AC243836. 1 | 0. 329965032 mirna_lnc |
| 30689 hsa-mir-99b  | AC099684. 2 | 0. 436982775 mirna_lnc |
| 30690 hsa-mir-1180 | AC012073. 1 | 0. 343522476 mirna_lnc |
| 30691 hsa-mir-1180 | AL662797. 1 | 0. 372724358 mirna_lnc |
| 30692 hsa-mir-1180 | TMPO-AS1    | 0. 347572678 mirna_lnc |
| 30693 hsa-mir-1180 | AP000808. 1 | 0. 307809961 mirna_lnc |
| 30694 hsa-mir-1180 | AL391244. 2 | 0. 319931983 mirna_lnc |
| 30695 hsa-mir-1180 | AC025627. 1 | 0. 595058943 mirna_lnc |
| 30696 hsa-mir-1180 | AL590683. 1 | 0. 306632364 mirna_lnc |
| 30697 hsa-mir-1180 | AC004241. 3 | 0. 315088063 mirna_lnc |
| 30698 hsa-mir-1180 | AL117332. 1 | 0. 429463874 mirna_lnc |
| 30699 hsa-mir-1180 | AC022211. 2 | 0. 320575767 mirna_lnc |
| 30700 hsa-mir-1180 | SCAT2       | 0. 303213381 mirna_lnc |
| 30701 hsa-mir-1180 | AC092614. 1 | 0. 310570256 mirna_lnc |
| 30702 hsa-mir-1180 | HOXC-AS2    | 0. 328172092 mirna_lnc |
| 30703 hsa-mir-1180 | AL049539. 1 | 0. 305494125 mirna_lnc |
| 30704 hsa-mir-1180 | JARID2-AS1  | 0. 304638697 mirna_lnc |
| 30705 hsa-mir-1180 | AC016065. 1 | 0. 31470807 mirna_lnc  |
| 30706 hsa-mir-1180 | AC074117. 1 | 0. 32709681 mirna_lnc  |
| 30707 hsa-mir-1180 | AP001469. 3 | 0. 335908115 mirna_lnc |
| 30708 hsa-mir-1180 | AL031667. 3 | 0. 370367047 mirna_lnc |
| 30709 hsa-mir-1180 | TFAP2A-AS1  | 0. 30505184 mirna_lnc  |
| 30710 hsa-mir-1180 | AP000526. 1 | 0. 31711635 mirna_lnc  |
| 30711 hsa-mir-1180 | DLGAP1-AS2  | 0. 330466497 mirna_lnc |
| 30712 hsa-mir-1180 | AC063977. 6 | 0. 389341011 mirna_lnc |
| 30713 hsa-mir-1180 | AC005324. 5 | 0. 464615264 mirna_lnc |
| 30714 hsa-mir-1180 | AL023803. 3 | 0. 335684295 mirna_lnc |
| 30715 hsa-mir-1180 | AC093484. 4 | 0. 300242026 mirna_lnc |
| 30716 hsa-mir-1180 | AC109322. 1 | 0. 304529835 mirna_lnc |
| 30717 hsa-mir-1180 | PLCH1-AS2   | 0. 402518707 mirna_lnc |
| 30718 hsa-mir-1180 | AC074351. 1 | 0. 377550093 mirna_lnc |
| 30719 hsa-mir-1180 | AL138724. 1 | 0. 300709113 mirna_lnc |
| 30720 hsa-mir-1180 | AL445072. 1 | 0. 393903507 mirna_lnc |
| 30721 hsa-mir-1180 | AP002478. 1 | 0. 336365327 mirna_lnc |
| 30722 hsa-mir-1180 | AC016723. 1 | 0. 355709908 mirna_lnc |
| 30723 hsa-mir-1180 | AC104472. 1 | 0. 336281496 mirna_lnc |
| 30724 hsa-mir-1180 | SNHG19      | 0. 317805066 mirna_lnc |
| 30725 hsa-mir-1180 | AL137802. 2 | 0. 315954308 mirna_lnc |

|                    |              |                       |
|--------------------|--------------|-----------------------|
| 30726 hsa-mir-1180 | AC091729.3   | 0.324654075 mirna_lnc |
| 30727 hsa-mir-1180 | LINC01806    | 0.31797025 mirna_lnc  |
| 30728 hsa-mir-1180 | AL136162.1   | 0.383146984 mirna_lnc |
| 30729 hsa-mir-1180 | LINC02367    | 0.33171183 mirna_lnc  |
| 30730 hsa-mir-1180 | AC073195.1   | 0.384221246 mirna_lnc |
| 30731 hsa-mir-1180 | AC015818.2   | 0.357205907 mirna_lnc |
| 30732 hsa-mir-1180 | LINC01096    | 0.311750995 mirna_lnc |
| 30733 hsa-mir-1180 | AC021683.3   | 0.302769504 mirna_lnc |
| 30734 hsa-mir-1180 | AL391069.2   | 0.324295127 mirna_lnc |
| 30735 hsa-mir-1180 | AC012640.2   | 0.33335112 mirna_lnc  |
| 30736 hsa-mir-1180 | AC116049.2   | 0.357060851 mirna_lnc |
| 30737 hsa-mir-1180 | AL139023.1   | 0.309896468 mirna_lnc |
| 30738 hsa-mir-1180 | AL513497.1   | 0.344881823 mirna_lnc |
| 30739 hsa-mir-1180 | AL161772.1   | 0.365927293 mirna_lnc |
| 30740 hsa-mir-1180 | AC024230.1   | 0.375043908 mirna_lnc |
| 30741 hsa-mir-1180 | LINC01397    | 0.335360018 mirna_lnc |
| 30742 hsa-mir-1180 | LINC01424    | 0.367873298 mirna_lnc |
| 30743 hsa-mir-1180 | AL591846.2   | 0.300139729 mirna_lnc |
| 30744 hsa-mir-1180 | TBC1D8-AS1   | 0.33631007 mirna_lnc  |
| 30745 hsa-mir-1180 | AP000487.1   | 0.33947619 mirna_lnc  |
| 30746 hsa-mir-1180 | KIAA1614-AS1 | 0.370326555 mirna_lnc |
| 30747 hsa-mir-1180 | AC016876.3   | 0.388275611 mirna_lnc |
| 30748 hsa-mir-1180 | AL391845.2   | 0.339151566 mirna_lnc |
| 30749 hsa-mir-1180 | AL359643.3   | 0.376881874 mirna_lnc |
| 30750 hsa-mir-1180 | AL163051.1   | 0.307660792 mirna_lnc |
| 30751 hsa-mir-1180 | AC104971.1   | 0.313987525 mirna_lnc |
| 30752 hsa-mir-1180 | LINC01456    | 0.36849319 mirna_lnc  |
| 30753 hsa-mir-1180 | AC002076.1   | 0.355573891 mirna_lnc |
| 30754 hsa-mir-1180 | LINC01850    | 0.415493626 mirna_lnc |
| 30755 hsa-mir-1180 | AC007952.4   | 0.431125128 mirna_lnc |
| 30756 hsa-mir-1180 | AP000593.3   | 0.300607043 mirna_lnc |
| 30757 hsa-mir-1180 | WWTR1-AS1    | 0.338655679 mirna_lnc |
| 30758 hsa-mir-1180 | AC020558.2   | 0.362823972 mirna_lnc |
| 30759 hsa-mir-1180 | LINC01686    | 0.335212843 mirna_lnc |
| 30760 hsa-mir-1180 | LINC01143    | 0.311699943 mirna_lnc |
| 30761 hsa-mir-1180 | AC022031.2   | 0.324718036 mirna_lnc |
| 30762 hsa-mir-1180 | LINC01968    | 0.320947697 mirna_lnc |
| 30763 hsa-mir-1180 | AC125618.1   | 0.342543093 mirna_lnc |
| 30764 hsa-mir-1180 | AC002550.1   | 0.344677627 mirna_lnc |
| 30765 hsa-mir-1180 | AC010271.2   | 0.304146139 mirna_lnc |
| 30766 hsa-mir-1180 | AL354714.1   | 0.339945468 mirna_lnc |
| 30767 hsa-mir-1180 | AC010595.1   | 0.302325469 mirna_lnc |
| 30768 hsa-mir-1180 | AL391069.3   | 0.322581031 mirna_lnc |
| 30769 hsa-mir-1180 | AC006483.2   | 0.399788444 mirna_lnc |
| 30770 hsa-mir-1180 | AL592071.1   | 0.357304326 mirna_lnc |
| 30771 hsa-mir-1180 | SMCR2        | 0.300135859 mirna_lnc |
| 30772 hsa-mir-1180 | LINC01816    | 0.327443097 mirna_lnc |
| 30773 hsa-mir-1180 | AC007881.3   | 0.308221363 mirna_lnc |
| 30774 hsa-mir-1180 | AC010969.2   | 0.355805519 mirna_lnc |
| 30775 hsa-mir-1180 | LINC01521    | 0.338409445 mirna_lnc |
| 30776 hsa-mir-1180 | AC100812.1   | 0.331173448 mirna_lnc |
| 30777 hsa-mir-1180 | AC011297.1   | 0.300817221 mirna_lnc |
| 30778 hsa-mir-1180 | AC004943.3   | 0.326671054 mirna_lnc |
| 30779 hsa-mir-1180 | AC046143.2   | 0.301138817 mirna_lnc |

|                    |             |                       |
|--------------------|-------------|-----------------------|
| 30780 hsa-mir-1180 | AC112907.1  | 0.331283016 mirna_lnc |
| 30781 hsa-mir-1180 | AC126614.1  | 0.319684935 mirna_lnc |
| 30782 hsa-mir-1180 | AL451085.2  | 0.32000942 mirna_lnc  |
| 30783 hsa-mir-1180 | AC117382.2  | 0.31358125 mirna_lnc  |
| 30784 hsa-mir-1180 | AC091153.3  | 0.409794588 mirna_lnc |
| 30785 hsa-mir-1180 | AC063948.1  | 0.311883697 mirna_lnc |
| 30786 hsa-mir-1180 | AC087742.1  | 0.360048676 mirna_lnc |
| 30787 hsa-mir-1180 | AL354892.2  | 0.476707242 mirna_lnc |
| 30788 hsa-mir-1180 | AC122688.4  | 0.343246744 mirna_lnc |
| 30789 hsa-mir-1180 | DDX39B-AS1  | 0.311678563 mirna_lnc |
| 30790 hsa-mir-1180 | AC106820.2  | 0.367005712 mirna_lnc |
| 30791 hsa-mir-1180 | AC026271.3  | 0.454229097 mirna_lnc |
| 30792 hsa-mir-1180 | AC012640.5  | 0.331015086 mirna_lnc |
| 30793 hsa-mir-1180 | AL512408.1  | 0.325766492 mirna_lnc |
| 30794 hsa-mir-1180 | AC090527.3  | 0.318284052 mirna_lnc |
| 30795 hsa-mir-1180 | MIR762HG    | 0.366772276 mirna_lnc |
| 30796 hsa-mir-1180 | AC010422.2  | 0.31897172 mirna_lnc  |
| 30797 hsa-mir-1180 | AC131532.1  | 0.431297833 mirna_lnc |
| 30798 hsa-mir-1180 | RNASEH1-AS1 | 0.308623946 mirna_lnc |
| 30799 hsa-mir-1180 | LINC01063   | 0.364398277 mirna_lnc |
| 30800 hsa-mir-1180 | AC092669.1  | 0.388344634 mirna_lnc |
| 30801 hsa-mir-1180 | AP002336.2  | 0.341680658 mirna_lnc |
| 30802 hsa-mir-1180 | TBL1XR1-AS1 | 0.360168399 mirna_lnc |
| 30803 hsa-mir-1180 | AC010542.4  | 0.331519985 mirna_lnc |
| 30804 hsa-mir-1180 | AC092171.3  | 0.300330977 mirna_lnc |
| 30805 hsa-mir-1180 | AC078802.1  | 0.350485273 mirna_lnc |
| 30806 hsa-mir-1180 | AC080013.5  | 0.30246624 mirna_lnc  |
| 30807 hsa-mir-1180 | LINC02562   | 0.321338327 mirna_lnc |
| 30808 hsa-mir-1180 | ADGRD1-AS1  | 0.335407334 mirna_lnc |
| 30809 hsa-mir-1180 | AC005730.2  | 0.318001455 mirna_lnc |
| 30810 hsa-mir-1180 | AC020741.1  | 0.301290859 mirna_lnc |
| 30811 hsa-mir-1180 | AC024560.3  | 0.385912457 mirna_lnc |
| 30812 hsa-mir-1180 | AC107926.1  | 0.426028381 mirna_lnc |
| 30813 hsa-mir-1180 | MCCC1-AS1   | 0.378621663 mirna_lnc |
| 30814 hsa-mir-1180 | AC009271.1  | 0.398685003 mirna_lnc |
| 30815 hsa-mir-1180 | AC098818.2  | 0.380948703 mirna_lnc |
| 30816 hsa-mir-1180 | AC022762.1  | 0.315076656 mirna_lnc |
| 30817 hsa-mir-1180 | LINC01994   | 0.309893551 mirna_lnc |
| 30818 hsa-mir-1180 | AC012146.3  | 0.308197727 mirna_lnc |
| 30819 hsa-mir-1180 | AC008267.5  | 0.318336166 mirna_lnc |
| 30820 hsa-mir-1180 | AC005695.3  | 0.363066533 mirna_lnc |
| 30821 hsa-mir-1180 | AC107214.1  | 0.351578251 mirna_lnc |
| 30822 hsa-mir-1180 | AC131235.3  | 0.339774042 mirna_lnc |
| 30823 hsa-mir-1180 | LINC00885   | 0.40479193 mirna_lnc  |
| 30824 hsa-mir-1180 | AL022324.3  | 0.306724817 mirna_lnc |
| 30825 hsa-mir-1180 | AP005328.2  | 0.313772351 mirna_lnc |
| 30826 hsa-mir-1180 | DDR1-DT     | 0.3505879 mirna_lnc   |
| 30827 hsa-mir-1180 | AC078925.4  | 0.364549952 mirna_lnc |
| 30828 hsa-mir-1180 | URB1-AS1    | 0.328707704 mirna_lnc |
| 30829 hsa-mir-1180 | AC091271.1  | 0.332097318 mirna_lnc |
| 30830 hsa-mir-1180 | AP004782.1  | 0.349576862 mirna_lnc |
| 30831 hsa-mir-1180 | AC026304.1  | 0.31129252 mirna_lnc  |
| 30832 hsa-mir-1180 | HHIP-AS1    | 0.309287238 mirna_lnc |
| 30833 hsa-mir-1180 | ELDR        | 0.320594514 mirna_lnc |

|                    |            |                       |
|--------------------|------------|-----------------------|
| 30834 hsa-mir-1180 | AC090617.5 | 0.313044972 mirna_lnc |
| 30835 hsa-mir-1180 | AC019129.2 | 0.346843601 mirna_lnc |
| 30836 hsa-mir-1180 | AC005790.1 | 0.325479733 mirna_lnc |
| 30837 hsa-mir-1180 | AC002310.1 | 0.332860691 mirna_lnc |
| 30838 hsa-mir-1180 | AC005064.1 | 0.32980775 mirna_lnc  |
| 30839 hsa-mir-1180 | AL606760.3 | 0.332798763 mirna_lnc |
| 30840 hsa-mir-1180 | AL591167.1 | 0.313771235 mirna_lnc |
| 30841 hsa-mir-1180 | AC093677.2 | 0.316062931 mirna_lnc |
| 30842 hsa-mir-1180 | AC023509.3 | 0.309059221 mirna_lnc |
| 30843 hsa-mir-1180 | AL592211.1 | 0.349814621 mirna_lnc |
| 30844 hsa-mir-1180 | INTS6L-AS1 | 0.306951386 mirna_lnc |
| 30845 hsa-mir-1180 | TERC       | 0.422022996 mirna_lnc |
| 30846 hsa-mir-1180 | AP001160.1 | 0.32667089 mirna_lnc  |
| 30847 hsa-mir-1180 | AP001596.1 | 0.327028813 mirna_lnc |
| 30848 hsa-mir-1180 | AC007389.5 | 0.308540249 mirna_lnc |
| 30849 hsa-mir-1180 | AP000251.1 | 0.414850755 mirna_lnc |
| 30850 hsa-mir-1180 | AC025219.1 | 0.318568242 mirna_lnc |
| 30851 hsa-mir-1180 | AF130417.1 | 0.319653246 mirna_lnc |
| 30852 hsa-mir-1180 | OBSCN-AS1  | 0.319164164 mirna_lnc |
| 30853 hsa-mir-1180 | AC007032.1 | 0.301027807 mirna_lnc |
| 30854 hsa-mir-1180 | AC098936.1 | 0.344067749 mirna_lnc |
| 30855 hsa-mir-1180 | PITPNA-AS1 | 0.373100063 mirna_lnc |
| 30856 hsa-mir-1180 | AC138207.2 | 0.325363914 mirna_lnc |
| 30857 hsa-mir-1180 | ETV5-AS1   | 0.329741002 mirna_lnc |
| 30858 hsa-mir-1180 | LINC02006  | 0.318784031 mirna_lnc |
| 30859 hsa-mir-1180 | AC107294.1 | 0.378354178 mirna_lnc |
| 30860 hsa-mir-1180 | AL024497.1 | 0.343296247 mirna_lnc |
| 30861 hsa-mir-1180 | SCAT8      | 0.327313464 mirna_lnc |
| 30862 hsa-mir-1180 | AC002550.2 | 0.321267657 mirna_lnc |
| 30863 hsa-mir-1180 | AL032819.1 | 0.398074707 mirna_lnc |
| 30864 hsa-mir-1180 | AC124254.1 | 0.306108931 mirna_lnc |
| 30865 hsa-mir-1180 | AC010501.1 | 0.331017434 mirna_lnc |
| 30866 hsa-mir-1180 | AC087392.3 | 0.329213328 mirna_lnc |
| 30867 hsa-mir-1180 | LINC01030  | 0.314292894 mirna_lnc |
| 30868 hsa-mir-1180 | AL118511.1 | 0.357260688 mirna_lnc |
| 30869 hsa-mir-1180 | LINC02506  | 0.456470958 mirna_lnc |
| 30870 hsa-mir-1180 | AL583808.1 | 0.378791209 mirna_lnc |
| 30871 hsa-mir-1180 | GIHCG      | 0.441928913 mirna_lnc |
| 30872 hsa-mir-1180 | Z93241.1   | 0.375559434 mirna_lnc |
| 30873 hsa-mir-1180 | AC110285.2 | 0.348736008 mirna_lnc |
| 30874 hsa-mir-1180 | LINC02470  | 0.347018135 mirna_lnc |
| 30875 hsa-mir-1180 | AC008443.3 | 0.317712134 mirna_lnc |
| 30876 hsa-mir-1180 | GTSE1-DT   | 0.33964159 mirna_lnc  |
| 30877 hsa-mir-1180 | AC135178.5 | 0.355299456 mirna_lnc |
| 30878 hsa-mir-1180 | AC106820.4 | 0.31929686 mirna_lnc  |
| 30879 hsa-mir-1180 | AC010096.1 | 0.414557079 mirna_lnc |
| 30880 hsa-mir-1180 | AC093599.1 | 0.31453089 mirna_lnc  |
| 30881 hsa-mir-1180 | AL645608.6 | 0.316037504 mirna_lnc |
| 30882 hsa-mir-1180 | AC011840.2 | 0.387372151 mirna_lnc |
| 30883 hsa-mir-1180 | AC010980.2 | 0.327263903 mirna_lnc |
| 30884 hsa-mir-1180 | AC025162.2 | 0.332391264 mirna_lnc |
| 30885 hsa-mir-1180 | LINC01918  | 0.315027612 mirna_lnc |
| 30886 hsa-mir-1180 | PARD3-AS1  | 0.315113201 mirna_lnc |
| 30887 hsa-mir-1180 | AC090061.1 | 0.318791754 mirna_lnc |



|                    |              |                       |
|--------------------|--------------|-----------------------|
| 30888 hsa-mir-1180 | FAM87B       | 0.338973351 mirna_lnc |
| 30889 hsa-mir-1180 | AL033527.2   | 0.310465319 mirna_lnc |
| 30890 hsa-mir-1180 | AC025287.2   | 0.339210487 mirna_lnc |
| 30891 hsa-mir-1180 | AC007497.1   | 0.445992687 mirna_lnc |
| 30892 hsa-mir-1180 | AC005197.1   | 0.365685897 mirna_lnc |
| 30893 hsa-mir-1180 | AL359504.2   | 0.369090003 mirna_lnc |
| 30894 hsa-mir-1180 | RN7SL832P    | 0.385198602 mirna_lnc |
| 30895 hsa-mir-1180 | LINC02094    | 0.329505116 mirna_lnc |
| 30896 hsa-mir-1180 | AC016229.2   | 0.30600284 mirna_lnc  |
| 30897 hsa-mir-1180 | AP001972.4   | 0.398145495 mirna_lnc |
| 30898 hsa-mir-1180 | AL132655.1   | 0.395555793 mirna_lnc |
| 30899 hsa-mir-1180 | AC018450.1   | 0.3023279 mirna_lnc   |
| 30900 hsa-mir-1180 | AC010624.2   | 0.306256192 mirna_lnc |
| 30901 hsa-mir-1180 | AL645608.2   | 0.318484012 mirna_lnc |
| 30902 hsa-mir-1180 | AC107294.2   | 0.400017707 mirna_lnc |
| 30903 hsa-mir-1180 | AC015917.2   | 0.304170161 mirna_lnc |
| 30904 hsa-mir-1180 | UBXN7-AS1    | 0.30600777 mirna_lnc  |
| 30905 hsa-mir-1180 | LINC01700    | 0.327439265 mirna_lnc |
| 30906 hsa-mir-1180 | AF213884.3   | 0.333738647 mirna_lnc |
| 30907 hsa-mir-1180 | AC021092.1   | 0.338714461 mirna_lnc |
| 30908 hsa-mir-1180 | AC107294.3   | 0.384120175 mirna_lnc |
| 30909 hsa-mir-1180 | LINC02373    | 0.339896684 mirna_lnc |
| 30910 hsa-mir-1180 | AC114271.1   | 0.305068615 mirna_lnc |
| 30911 hsa-mir-1180 | CPEB1-AS1    | 0.334050129 mirna_lnc |
| 30912 hsa-mir-1180 | AC107982.3   | 0.405560745 mirna_lnc |
| 30913 hsa-mir-1180 | SNHG9        | 0.335632911 mirna_lnc |
| 30914 hsa-mir-1180 | AC012676.3   | 0.318880717 mirna_lnc |
| 30915 hsa-mir-455  | AC026401.3   | 0.411964196 mirna_lnc |
| 30916 hsa-mir-455  | AC012073.1   | 0.327110114 mirna_lnc |
| 30917 hsa-mir-455  | AGAP2-AS1    | 0.373366492 mirna_lnc |
| 30918 hsa-mir-455  | AC034213.1   | 0.357178638 mirna_lnc |
| 30919 hsa-mir-455  | VPS9D1-AS1   | 0.401421362 mirna_lnc |
| 30920 hsa-mir-455  | AC092614.1   | 0.402651067 mirna_lnc |
| 30921 hsa-mir-455  | AP001453.2   | 0.31449636 mirna_lnc  |
| 30922 hsa-mir-455  | HOXC-AS2     | 0.372281207 mirna_lnc |
| 30923 hsa-mir-455  | AC019069.1   | 0.326088781 mirna_lnc |
| 30924 hsa-mir-455  | AC004943.2   | 0.362154671 mirna_lnc |
| 30925 hsa-mir-455  | AC117394.2   | 0.318888153 mirna_lnc |
| 30926 hsa-mir-455  | AC093388.1   | 0.305162543 mirna_lnc |
| 30927 hsa-mir-455  | AC147651.4   | 0.341617908 mirna_lnc |
| 30928 hsa-mir-455  | CLEC12A-AS1  | 0.480669783 mirna_lnc |
| 30929 hsa-mir-455  | AC069360.1   | 0.318200794 mirna_lnc |
| 30930 hsa-mir-455  | AL138724.1   | 0.493614323 mirna_lnc |
| 30931 hsa-mir-455  | AL441992.1   | 0.402621396 mirna_lnc |
| 30932 hsa-mir-455  | AC006329.1   | 0.343710094 mirna_lnc |
| 30933 hsa-mir-455  | LINC01096    | 0.300518101 mirna_lnc |
| 30934 hsa-mir-455  | AC126773.2   | 0.35073418 mirna_lnc  |
| 30935 hsa-mir-455  | MAPK6-DT     | 0.310286074 mirna_lnc |
| 30936 hsa-mir-455  | AL450322.2   | 0.348989468 mirna_lnc |
| 30937 hsa-mir-455  | AC114956.2   | 0.399898763 mirna_lnc |
| 30938 hsa-mir-455  | ATP6V1B1-AS1 | 0.306116999 mirna_lnc |
| 30939 hsa-mir-455  | AC024230.1   | 0.352499818 mirna_lnc |
| 30940 hsa-mir-455  | AL078644.2   | 0.3646993 mirna_lnc   |
| 30941 hsa-mir-455  | P3H2-AS1     | 0.420743609 mirna_lnc |

|                     |             |                       |
|---------------------|-------------|-----------------------|
| 30942 hsa-mir-455   | AC010168.1  | 0.380181377 mirna_lnc |
| 30943 hsa-mir-455   | TM4SF19-AS1 | 0.318712828 mirna_lnc |
| 30944 hsa-mir-455   | AC104971.1  | 0.332510275 mirna_lnc |
| 30945 hsa-mir-455   | AC019205.1  | 0.443411332 mirna_lnc |
| 30946 hsa-mir-455   | AC002401.4  | 0.338419471 mirna_lnc |
| 30947 hsa-mir-455   | MYOSLID     | 0.388553501 mirna_lnc |
| 30948 hsa-mir-455   | AC092070.4  | 0.309427859 mirna_lnc |
| 30949 hsa-mir-455   | AL138789.1  | 0.307027979 mirna_lnc |
| 30950 hsa-mir-455   | AC022031.2  | 0.310849065 mirna_lnc |
| 30951 hsa-mir-455   | AL136131.2  | 0.300111036 mirna_lnc |
| 30952 hsa-mir-455   | TTLL11-IT1  | 0.502684043 mirna_lnc |
| 30953 hsa-mir-455   | AC010595.1  | 0.401506416 mirna_lnc |
| 30954 hsa-mir-455   | AC069503.1  | 0.363748192 mirna_lnc |
| 30955 hsa-mir-455   | AC100812.1  | 0.352070868 mirna_lnc |
| 30956 hsa-mir-455   | AC011297.1  | 0.355640418 mirna_lnc |
| 30957 hsa-mir-455   | AC055736.1  | 0.465226905 mirna_lnc |
| 30958 hsa-mir-455   | AC004846.1  | 0.393400506 mirna_lnc |
| 30959 hsa-mir-455   | AC016205.1  | 0.360946105 mirna_lnc |
| 30960 hsa-mir-455   | LINC02657   | 0.31869071 mirna_lnc  |
| 30961 hsa-mir-455   | AC091170.1  | 0.448377529 mirna_lnc |
| 30962 hsa-mir-455   | AC114956.1  | 0.306488046 mirna_lnc |
| 30963 hsa-mir-455   | BX322234.1  | 0.360712857 mirna_lnc |
| 30964 hsa-mir-455   | AL358334.2  | 0.428486965 mirna_lnc |
| 30965 hsa-mir-455   | AC025183.1  | 0.370062582 mirna_lnc |
| 30966 hsa-mir-455   | NLGN4Y-AS1  | 0.318677121 mirna_lnc |
| 30967 hsa-mir-455   | AC009271.1  | 0.34501491 mirna_lnc  |
| 30968 hsa-mir-455   | AC034223.2  | 0.32325536 mirna_lnc  |
| 30969 hsa-mir-455   | AC025183.2  | 0.439391077 mirna_lnc |
| 30970 hsa-mir-455   | AC034206.1  | 0.345037492 mirna_lnc |
| 30971 hsa-mir-455   | AL135818.2  | 0.397320338 mirna_lnc |
| 30972 hsa-mir-455   | AL359091.5  | 0.366312056 mirna_lnc |
| 30973 hsa-mir-455   | AC091182.2  | 0.39532722 mirna_lnc  |
| 30974 hsa-mir-455   | AL034399.2  | 0.477286552 mirna_lnc |
| 30975 hsa-mir-455   | AC126768.3  | 0.30987157 mirna_lnc  |
| 30976 hsa-mir-455   | MIR31HG     | 0.305389882 mirna_lnc |
| 30977 hsa-mir-455   | AC010343.3  | 0.34177314 mirna_lnc  |
| 30978 hsa-mir-455   | AC084032.1  | 0.30373329 mirna_lnc  |
| 30979 hsa-mir-455   | AL390760.1  | 0.320003011 mirna_lnc |
| 30980 hsa-mir-455   | LINC02470   | 0.323317912 mirna_lnc |
| 30981 hsa-mir-455   | AL162413.1  | 0.39041148 mirna_lnc  |
| 30982 hsa-mir-455   | AC126768.1  | 0.303777328 mirna_lnc |
| 30983 hsa-mir-455   | AC126768.2  | 0.375029613 mirna_lnc |
| 30984 hsa-mir-455   | AL359771.1  | 0.331608696 mirna_lnc |
| 30985 hsa-mir-455   | AF213884.3  | 0.301143859 mirna_lnc |
| 30986 hsa-mir-455   | AC104031.1  | 0.309919209 mirna_lnc |
| 30987 hsa-mir-455   | AL445483.1  | 0.34756867 mirna_lnc  |
| 30988 hsa-mir-103-2 | AC012073.1  | 0.312284488 mirna_lnc |
| 30989 hsa-mir-103-2 | TMPO-AS1    | 0.323878108 mirna_lnc |
| 30990 hsa-mir-103-2 | AL035461.2  | 0.389676304 mirna_lnc |
| 30991 hsa-mir-103-2 | AC022211.1  | 0.300816661 mirna_lnc |
| 30992 hsa-mir-103-2 | AP001469.3  | 0.316639576 mirna_lnc |
| 30993 hsa-mir-103-2 | AC131009.3  | 0.312622359 mirna_lnc |
| 30994 hsa-mir-103-2 | LINC02367   | 0.318181656 mirna_lnc |
| 30995 hsa-mir-103-2 | AC012360.3  | 0.303850668 mirna_lnc |

|                     |             |                       |
|---------------------|-------------|-----------------------|
| 30996 hsa-mir-103-2 | GK-IT1      | 0.315463254 mirna_lnc |
| 30997 hsa-mir-103-2 | AC005379.1  | 0.313943842 mirna_lnc |
| 30998 hsa-mir-103-2 | AC011773.1  | 0.383887085 mirna_lnc |
| 30999 hsa-mir-103-2 | AC105235.1  | 0.32466907 mirna_lnc  |
| 31000 hsa-mir-103-2 | AC083843.3  | 0.327035183 mirna_lnc |
| 31001 hsa-mir-103-2 | AL603832.1  | 0.329158376 mirna_lnc |
| 31002 hsa-mir-103-2 | AC011676.5  | 0.336494266 mirna_lnc |
| 31003 hsa-mir-103-2 | AC011676.2  | 0.308400827 mirna_lnc |
| 31004 hsa-mir-103-2 | AC003991.2  | 0.331620981 mirna_lnc |
| 31005 hsa-mir-103-2 | AC099684.2  | 0.329022995 mirna_lnc |
| 31006 hsa-mir-20a   | AC012073.1  | 0.395585371 mirna_lnc |
| 31007 hsa-mir-20a   | AC010761.2  | 0.341264811 mirna_lnc |
| 31008 hsa-mir-20a   | AC012531.1  | 0.331474917 mirna_lnc |
| 31009 hsa-mir-20a   | AL035461.2  | 0.311192732 mirna_lnc |
| 31010 hsa-mir-20a   | AL138759.1  | 0.353816378 mirna_lnc |
| 31011 hsa-mir-20a   | DDX11-AS1   | 0.336025254 mirna_lnc |
| 31012 hsa-mir-20a   | AL161891.1  | 0.572857029 mirna_lnc |
| 31013 hsa-mir-20a   | AC092614.1  | 0.312829969 mirna_lnc |
| 31014 hsa-mir-20a   | AL157932.1  | 0.362835353 mirna_lnc |
| 31015 hsa-mir-20a   | HOXC-AS2    | 0.325749499 mirna_lnc |
| 31016 hsa-mir-20a   | AC019069.1  | 0.31385504 mirna_lnc  |
| 31017 hsa-mir-20a   | AP001469.3  | 0.334565579 mirna_lnc |
| 31018 hsa-mir-20a   | AC004943.2  | 0.309997233 mirna_lnc |
| 31019 hsa-mir-20a   | AL356740.1  | 0.331284628 mirna_lnc |
| 31020 hsa-mir-20a   | AC027627.1  | 0.306452808 mirna_lnc |
| 31021 hsa-mir-20a   | AC021945.1  | 0.390961096 mirna_lnc |
| 31022 hsa-mir-20a   | AC025176.1  | 0.371075456 mirna_lnc |
| 31023 hsa-mir-20a   | AC090844.3  | 0.374400778 mirna_lnc |
| 31024 hsa-mir-20a   | AC090159.1  | 0.382346957 mirna_lnc |
| 31025 hsa-mir-20a   | AC024940.6  | 0.368427728 mirna_lnc |
| 31026 hsa-mir-20a   | GCC2-AS1    | 0.308860263 mirna_lnc |
| 31027 hsa-mir-20a   | AC015849.5  | 0.318875316 mirna_lnc |
| 31028 hsa-mir-20a   | AC125257.1  | 0.308729677 mirna_lnc |
| 31029 hsa-mir-20a   | AC012360.3  | 0.388147562 mirna_lnc |
| 31030 hsa-mir-20a   | AL139089.1  | 0.349442823 mirna_lnc |
| 31031 hsa-mir-20a   | AL161772.1  | 0.345868621 mirna_lnc |
| 31032 hsa-mir-20a   | AL355388.2  | 0.340243154 mirna_lnc |
| 31033 hsa-mir-20a   | AC004080.1  | 0.325616257 mirna_lnc |
| 31034 hsa-mir-20a   | AC005831.1  | 0.319127465 mirna_lnc |
| 31035 hsa-mir-20a   | AC138904.1  | 0.36310567 mirna_lnc  |
| 31036 hsa-mir-20a   | AC004943.1  | 0.398416733 mirna_lnc |
| 31037 hsa-mir-20a   | LINC01460   | 0.432960693 mirna_lnc |
| 31038 hsa-mir-20a   | AC018878.1  | 0.33306298 mirna_lnc  |
| 31039 hsa-mir-20a   | TRPM2-AS    | 0.339318677 mirna_lnc |
| 31040 hsa-mir-20a   | UBR5-AS1    | 0.312806558 mirna_lnc |
| 31041 hsa-mir-20a   | SREBF2-AS1  | 0.303378665 mirna_lnc |
| 31042 hsa-mir-20a   | AC004943.3  | 0.320686425 mirna_lnc |
| 31043 hsa-mir-20a   | DNAJC3-DT   | 0.391358788 mirna_lnc |
| 31044 hsa-mir-20a   | AC026271.3  | 0.347425738 mirna_lnc |
| 31045 hsa-mir-20a   | AP002360.3  | 0.319210446 mirna_lnc |
| 31046 hsa-mir-20a   | AC016205.1  | 0.325802729 mirna_lnc |
| 31047 hsa-mir-20a   | PIK3CD-AS2  | 0.325657643 mirna_lnc |
| 31048 hsa-mir-20a   | AC007128.1  | 0.375324433 mirna_lnc |
| 31049 hsa-mir-20a   | RNASEH1-AS1 | 0.381287434 mirna_lnc |

|                    |            |                       |
|--------------------|------------|-----------------------|
| 31050 hsa-mir-20a  | AC087491.1 | 0.337609032 mirna_lnc |
| 31051 hsa-mir-20a  | AL139082.1 | 0.320377453 mirna_lnc |
| 31052 hsa-mir-20a  | AC005224.1 | 0.387388829 mirna_lnc |
| 31053 hsa-mir-20a  | AC011773.1 | 0.362184059 mirna_lnc |
| 31054 hsa-mir-20a  | AL442128.2 | 0.380194322 mirna_lnc |
| 31055 hsa-mir-20a  | AC145207.5 | 0.316997732 mirna_lnc |
| 31056 hsa-mir-20a  | STAM-AS1   | 0.328188727 mirna_lnc |
| 31057 hsa-mir-20a  | AC007938.3 | 0.378589183 mirna_lnc |
| 31058 hsa-mir-20a  | AL137244.1 | 0.361777006 mirna_lnc |
| 31059 hsa-mir-20a  | AL022324.3 | 0.30115339 mirna_lnc  |
| 31060 hsa-mir-20a  | LINC01238  | 0.306808483 mirna_lnc |
| 31061 hsa-mir-20a  | AL512652.2 | 0.378333631 mirna_lnc |
| 31062 hsa-mir-20a  | AP003086.2 | 0.303892508 mirna_lnc |
| 31063 hsa-mir-20a  | AL161452.1 | 0.31005708 mirna_lnc  |
| 31064 hsa-mir-20a  | AC112255.1 | 0.35633925 mirna_lnc  |
| 31065 hsa-mir-20a  | MCF2L-AS1  | 0.422028001 mirna_lnc |
| 31066 hsa-mir-20a  | AL138767.3 | 0.322829702 mirna_lnc |
| 31067 hsa-mir-20a  | ETV5-AS1   | 0.302187382 mirna_lnc |
| 31068 hsa-mir-20a  | ZNF649-AS1 | 0.305914924 mirna_lnc |
| 31069 hsa-mir-20a  | AC107068.1 | 0.371690866 mirna_lnc |
| 31070 hsa-mir-20a  | AL136531.1 | 0.310831909 mirna_lnc |
| 31071 hsa-mir-20a  | LINC01555  | 0.30280289 mirna_lnc  |
| 31072 hsa-mir-20a  | AL118511.1 | 0.376227702 mirna_lnc |
| 31073 hsa-mir-20a  | AC007001.1 | 0.325515341 mirna_lnc |
| 31074 hsa-mir-20a  | AC106820.4 | 0.358527632 mirna_lnc |
| 31075 hsa-mir-20a  | LINC02097  | 0.305597096 mirna_lnc |
| 31076 hsa-mir-20a  | AC005034.3 | 0.331464047 mirna_lnc |
| 31077 hsa-mir-20a  | AC007497.1 | 0.311194377 mirna_lnc |
| 31078 hsa-mir-20a  | LINC00449  | 0.301404365 mirna_lnc |
| 31079 hsa-mir-20a  | LINC00456  | 0.336686143 mirna_lnc |
| 31080 hsa-mir-20a  | AL049646.1 | 0.356848425 mirna_lnc |
| 31081 hsa-mir-20a  | AL161729.4 | 0.303564231 mirna_lnc |
| 31082 hsa-mir-20a  | AL596202.1 | 0.323898298 mirna_lnc |
| 31083 hsa-mir-20a  | AC080112.3 | 0.31543646 mirna_lnc  |
| 31084 hsa-mir-20a  | AL080317.1 | 0.31294643 mirna_lnc  |
| 31085 hsa-mir-20a  | PSPC1-AS2  | 0.375253225 mirna_lnc |
| 31086 hsa-mir-1301 | AC012073.1 | 0.459566587 mirna_lnc |
| 31087 hsa-mir-1301 | AP000708.1 | 0.361107332 mirna_lnc |
| 31088 hsa-mir-1301 | TYMSOS     | 0.310632983 mirna_lnc |
| 31089 hsa-mir-1301 | LINC02595  | 0.380391893 mirna_lnc |
| 31090 hsa-mir-1301 | AL662797.1 | 0.363136415 mirna_lnc |
| 31091 hsa-mir-1301 | LINC01873  | 0.43313153 mirna_lnc  |
| 31092 hsa-mir-1301 | AL137060.1 | 0.328351216 mirna_lnc |
| 31093 hsa-mir-1301 | MELTF-AS1  | 0.37146492 mirna_lnc  |
| 31094 hsa-mir-1301 | TMPO-AS1   | 0.500372283 mirna_lnc |
| 31095 hsa-mir-1301 | AL121832.2 | 0.423227017 mirna_lnc |
| 31096 hsa-mir-1301 | AC103591.3 | 0.433108327 mirna_lnc |
| 31097 hsa-mir-1301 | AC006252.1 | 0.382787739 mirna_lnc |
| 31098 hsa-mir-1301 | AC004241.3 | 0.505563651 mirna_lnc |
| 31099 hsa-mir-1301 | AL117332.1 | 0.44289815 mirna_lnc  |
| 31100 hsa-mir-1301 | AC022211.2 | 0.304114649 mirna_lnc |
| 31101 hsa-mir-1301 | SCAT2      | 0.323628127 mirna_lnc |
| 31102 hsa-mir-1301 | AL133338.1 | 0.30241428 mirna_lnc  |
| 31103 hsa-mir-1301 | CEP83-DT   | 0.410308019 mirna_lnc |

|                    |            |                       |
|--------------------|------------|-----------------------|
| 31104 hsa-mir-1301 | HOXC-AS2   | 0.348275697 mirna_lnc |
| 31105 hsa-mir-1301 | AL049539.1 | 0.315605136 mirna_lnc |
| 31106 hsa-mir-1301 | AL590326.1 | 0.343065385 mirna_lnc |
| 31107 hsa-mir-1301 | JARID2-AS1 | 0.562572749 mirna_lnc |
| 31108 hsa-mir-1301 | LINC00853  | 0.324806166 mirna_lnc |
| 31109 hsa-mir-1301 | AC074117.1 | 0.548577028 mirna_lnc |
| 31110 hsa-mir-1301 | AP001469.3 | 0.319906599 mirna_lnc |
| 31111 hsa-mir-1301 | AL031667.3 | 0.564339854 mirna_lnc |
| 31112 hsa-mir-1301 | TFAP2A-AS1 | 0.447835153 mirna_lnc |
| 31113 hsa-mir-1301 | LINC02601  | 0.337321356 mirna_lnc |
| 31114 hsa-mir-1301 | AC004812.2 | 0.330959984 mirna_lnc |
| 31115 hsa-mir-1301 | AC100791.2 | 0.370811615 mirna_lnc |
| 31116 hsa-mir-1301 | AC015982.1 | 0.421808282 mirna_lnc |
| 31117 hsa-mir-1301 | AL355297.3 | 0.358411663 mirna_lnc |
| 31118 hsa-mir-1301 | LINC02542  | 0.374221734 mirna_lnc |
| 31119 hsa-mir-1301 | AC009121.2 | 0.301539935 mirna_lnc |
| 31120 hsa-mir-1301 | AC010894.2 | 0.380900245 mirna_lnc |
| 31121 hsa-mir-1301 | AC092159.2 | 0.301189594 mirna_lnc |
| 31122 hsa-mir-1301 | AC005840.2 | 0.382748185 mirna_lnc |
| 31123 hsa-mir-1301 | AC008738.2 | 0.302946987 mirna_lnc |
| 31124 hsa-mir-1301 | AL023803.3 | 0.44053599 mirna_lnc  |
| 31125 hsa-mir-1301 | AC131009.3 | 0.306066904 mirna_lnc |
| 31126 hsa-mir-1301 | AC017083.1 | 0.461465563 mirna_lnc |
| 31127 hsa-mir-1301 | AL121655.1 | 0.443852193 mirna_lnc |
| 31128 hsa-mir-1301 | AC109322.1 | 0.409215754 mirna_lnc |
| 31129 hsa-mir-1301 | LINC01952  | 0.413915342 mirna_lnc |
| 31130 hsa-mir-1301 | AC107081.2 | 0.319210853 mirna_lnc |
| 31131 hsa-mir-1301 | AC074351.1 | 0.360628867 mirna_lnc |
| 31132 hsa-mir-1301 | KC877982.1 | 0.328343657 mirna_lnc |
| 31133 hsa-mir-1301 | AL445072.1 | 0.410638079 mirna_lnc |
| 31134 hsa-mir-1301 | AL592301.1 | 0.310587885 mirna_lnc |
| 31135 hsa-mir-1301 | AC079907.1 | 0.325405594 mirna_lnc |
| 31136 hsa-mir-1301 | AC023157.3 | 0.341055798 mirna_lnc |
| 31137 hsa-mir-1301 | AL137802.2 | 0.465841712 mirna_lnc |
| 31138 hsa-mir-1301 | AC087289.3 | 0.400697321 mirna_lnc |
| 31139 hsa-mir-1301 | AC091729.3 | 0.354202277 mirna_lnc |
| 31140 hsa-mir-1301 | AC007292.1 | 0.306519705 mirna_lnc |
| 31141 hsa-mir-1301 | AL136162.1 | 0.614057577 mirna_lnc |
| 31142 hsa-mir-1301 | AC010913.1 | 0.301117173 mirna_lnc |
| 31143 hsa-mir-1301 | LINC02367  | 0.347764704 mirna_lnc |
| 31144 hsa-mir-1301 | AC073195.1 | 0.522698062 mirna_lnc |
| 31145 hsa-mir-1301 | AL160291.1 | 0.384453302 mirna_lnc |
| 31146 hsa-mir-1301 | AC015818.2 | 0.413602568 mirna_lnc |
| 31147 hsa-mir-1301 | AL596094.1 | 0.523911913 mirna_lnc |
| 31148 hsa-mir-1301 | AC004069.1 | 0.581297842 mirna_lnc |
| 31149 hsa-mir-1301 | AC131025.1 | 0.336538412 mirna_lnc |
| 31150 hsa-mir-1301 | AC004920.1 | 0.558273455 mirna_lnc |
| 31151 hsa-mir-1301 | AC021683.3 | 0.604135721 mirna_lnc |
| 31152 hsa-mir-1301 | AC012360.3 | 0.423282953 mirna_lnc |
| 31153 hsa-mir-1301 | AC010359.1 | 0.398522 mirna_lnc    |
| 31154 hsa-mir-1301 | AL391069.2 | 0.422884805 mirna_lnc |
| 31155 hsa-mir-1301 | AC012640.2 | 0.4832523 mirna_lnc   |
| 31156 hsa-mir-1301 | AC090970.2 | 0.451434865 mirna_lnc |
| 31157 hsa-mir-1301 | AC110285.6 | 0.364190205 mirna_lnc |

|                    |                 |                       |
|--------------------|-----------------|-----------------------|
| 31158 hsa-mir-1301 | AC026782.2      | 0.450163709 mirna_lnc |
| 31159 hsa-mir-1301 | AC116049.2      | 0.346419316 mirna_lnc |
| 31160 hsa-mir-1301 | AL139023.1      | 0.374919506 mirna_lnc |
| 31161 hsa-mir-1301 | HOXC-AS3        | 0.33907093 mirna_lnc  |
| 31162 hsa-mir-1301 | AP003119.2      | 0.448816075 mirna_lnc |
| 31163 hsa-mir-1301 | YTHDF3-AS1      | 0.325991889 mirna_lnc |
| 31164 hsa-mir-1301 | AL513497.1      | 0.336367348 mirna_lnc |
| 31165 hsa-mir-1301 | ILF3-DT         | 0.330903581 mirna_lnc |
| 31166 hsa-mir-1301 | AC025244.1      | 0.339379523 mirna_lnc |
| 31167 hsa-mir-1301 | AL354993.2      | 0.347739372 mirna_lnc |
| 31168 hsa-mir-1301 | AC002470.1      | 0.309176533 mirna_lnc |
| 31169 hsa-mir-1301 | HAGLROS         | 0.31612363 mirna_lnc  |
| 31170 hsa-mir-1301 | AL133243.2      | 0.323766898 mirna_lnc |
| 31171 hsa-mir-1301 | AC012625.1      | 0.36828011 mirna_lnc  |
| 31172 hsa-mir-1301 | AL353764.1      | 0.527976377 mirna_lnc |
| 31173 hsa-mir-1301 | AC022413.1      | 0.360303636 mirna_lnc |
| 31174 hsa-mir-1301 | SYNGAP1-AS1     | 0.383846681 mirna_lnc |
| 31175 hsa-mir-1301 | AC024230.1      | 0.338677589 mirna_lnc |
| 31176 hsa-mir-1301 | AL031985.3      | 0.304744957 mirna_lnc |
| 31177 hsa-mir-1301 | AC006449.5      | 0.312264201 mirna_lnc |
| 31178 hsa-mir-1301 | AC013400.1      | 0.564914797 mirna_lnc |
| 31179 hsa-mir-1301 | AC138904.1      | 0.30832254 mirna_lnc  |
| 31180 hsa-mir-1301 | LINC01424       | 0.635564433 mirna_lnc |
| 31181 hsa-mir-1301 | AC099518.1      | 0.347311178 mirna_lnc |
| 31182 hsa-mir-1301 | AL391152.1      | 0.353701673 mirna_lnc |
| 31183 hsa-mir-1301 | AL355304.1      | 0.314120516 mirna_lnc |
| 31184 hsa-mir-1301 | TBC1D8-AS1      | 0.596824566 mirna_lnc |
| 31185 hsa-mir-1301 | TIPARP-AS1      | 0.404627072 mirna_lnc |
| 31186 hsa-mir-1301 | KIAA1614-AS1    | 0.52197512 mirna_lnc  |
| 31187 hsa-mir-1301 | AC016876.3      | 0.597947324 mirna_lnc |
| 31188 hsa-mir-1301 | AL031665.2      | 0.427977206 mirna_lnc |
| 31189 hsa-mir-1301 | AC079684.1      | 0.316089128 mirna_lnc |
| 31190 hsa-mir-1301 | AL163051.1      | 0.464821965 mirna_lnc |
| 31191 hsa-mir-1301 | AL513327.2      | 0.569890053 mirna_lnc |
| 31192 hsa-mir-1301 | AC104971.1      | 0.372202415 mirna_lnc |
| 31193 hsa-mir-1301 | IQCJ-SCHIP1-AS1 | 0.391414734 mirna_lnc |
| 31194 hsa-mir-1301 | AC138356.1      | 0.566134822 mirna_lnc |
| 31195 hsa-mir-1301 | LINC01456       | 0.433302937 mirna_lnc |
| 31196 hsa-mir-1301 | AC124016.1      | 0.335023559 mirna_lnc |
| 31197 hsa-mir-1301 | AC092807.2      | 0.420676056 mirna_lnc |
| 31198 hsa-mir-1301 | AC096887.2      | 0.399205498 mirna_lnc |
| 31199 hsa-mir-1301 | AC002076.1      | 0.322974522 mirna_lnc |
| 31200 hsa-mir-1301 | AC132192.2      | 0.305173182 mirna_lnc |
| 31201 hsa-mir-1301 | LINC01850       | 0.426341829 mirna_lnc |
| 31202 hsa-mir-1301 | AC007952.4      | 0.38195254 mirna_lnc  |
| 31203 hsa-mir-1301 | AC090517.2      | 0.403029368 mirna_lnc |
| 31204 hsa-mir-1301 | AL683887.1      | 0.340325703 mirna_lnc |
| 31205 hsa-mir-1301 | AC005670.1      | 0.310798687 mirna_lnc |
| 31206 hsa-mir-1301 | AP000593.3      | 0.414569028 mirna_lnc |
| 31207 hsa-mir-1301 | WWTR1-AS1       | 0.366279152 mirna_lnc |
| 31208 hsa-mir-1301 | LINC01686       | 0.460142411 mirna_lnc |
| 31209 hsa-mir-1301 | MIR583HG        | 0.302277139 mirna_lnc |
| 31210 hsa-mir-1301 | LINC01143       | 0.307573713 mirna_lnc |
| 31211 hsa-mir-1301 | AL445228.2      | 0.35476954 mirna_lnc  |

|                    |            |                       |
|--------------------|------------|-----------------------|
| 31212 hsa-mir-1301 | AL033527.3 | 0.316315393 mirna_lnc |
| 31213 hsa-mir-1301 | AC002550.1 | 0.38094855 mirna_lnc  |
| 31214 hsa-mir-1301 | AC239799.1 | 0.334938579 mirna_lnc |
| 31215 hsa-mir-1301 | EXOC3-AS1  | 0.328396056 mirna_lnc |
| 31216 hsa-mir-1301 | AC010595.1 | 0.376590443 mirna_lnc |
| 31217 hsa-mir-1301 | AL391069.3 | 0.321143986 mirna_lnc |
| 31218 hsa-mir-1301 | LINC02607  | 0.594770421 mirna_lnc |
| 31219 hsa-mir-1301 | AL592071.1 | 0.356845 mirna_lnc    |
| 31220 hsa-mir-1301 | WASIR2     | 0.395639287 mirna_lnc |
| 31221 hsa-mir-1301 | LINC01816  | 0.653832088 mirna_lnc |
| 31222 hsa-mir-1301 | TMC01-AS1  | 0.417803942 mirna_lnc |
| 31223 hsa-mir-1301 | AL121652.1 | 0.336901734 mirna_lnc |
| 31224 hsa-mir-1301 | SREBF2-AS1 | 0.399628478 mirna_lnc |
| 31225 hsa-mir-1301 | AC099518.6 | 0.582812119 mirna_lnc |
| 31226 hsa-mir-1301 | AC007881.3 | 0.56187322 mirna_lnc  |
| 31227 hsa-mir-1301 | AL121658.1 | 0.502491873 mirna_lnc |
| 31228 hsa-mir-1301 | AC010969.2 | 0.482377038 mirna_lnc |
| 31229 hsa-mir-1301 | AC022098.3 | 0.399818603 mirna_lnc |
| 31230 hsa-mir-1301 | AC005332.1 | 0.357723262 mirna_lnc |
| 31231 hsa-mir-1301 | LINC00167  | 0.581080828 mirna_lnc |
| 31232 hsa-mir-1301 | AC011825.4 | 0.344545201 mirna_lnc |
| 31233 hsa-mir-1301 | AC027702.1 | 0.30225868 mirna_lnc  |
| 31234 hsa-mir-1301 | LINC02637  | 0.320478947 mirna_lnc |
| 31235 hsa-mir-1301 | LINC01521  | 0.389096414 mirna_lnc |
| 31236 hsa-mir-1301 | AC023302.1 | 0.335225898 mirna_lnc |
| 31237 hsa-mir-1301 | AC004943.3 | 0.437763369 mirna_lnc |
| 31238 hsa-mir-1301 | AC046143.2 | 0.452960006 mirna_lnc |
| 31239 hsa-mir-1301 | AC145343.1 | 0.527863648 mirna_lnc |
| 31240 hsa-mir-1301 | AL358472.3 | 0.320543349 mirna_lnc |
| 31241 hsa-mir-1301 | AC112907.1 | 0.336694741 mirna_lnc |
| 31242 hsa-mir-1301 | AL121992.2 | 0.317428981 mirna_lnc |
| 31243 hsa-mir-1301 | AC093424.1 | 0.576766837 mirna_lnc |
| 31244 hsa-mir-1301 | AC091925.1 | 0.479036206 mirna_lnc |
| 31245 hsa-mir-1301 | AC117382.2 | 0.557715157 mirna_lnc |
| 31246 hsa-mir-1301 | AC091153.3 | 0.53551419 mirna_lnc  |
| 31247 hsa-mir-1301 | AC063948.1 | 0.506143435 mirna_lnc |
| 31248 hsa-mir-1301 | AL023803.1 | 0.305865847 mirna_lnc |
| 31249 hsa-mir-1301 | AC087742.1 | 0.518446207 mirna_lnc |
| 31250 hsa-mir-1301 | AL354892.2 | 0.482319347 mirna_lnc |
| 31251 hsa-mir-1301 | AC015802.5 | 0.417009836 mirna_lnc |
| 31252 hsa-mir-1301 | AL139327.2 | 0.462702633 mirna_lnc |
| 31253 hsa-mir-1301 | DDX39B-AS1 | 0.371545786 mirna_lnc |
| 31254 hsa-mir-1301 | AL031963.3 | 0.348125984 mirna_lnc |
| 31255 hsa-mir-1301 | AC069148.1 | 0.365175392 mirna_lnc |
| 31256 hsa-mir-1301 | AC106820.2 | 0.303403493 mirna_lnc |
| 31257 hsa-mir-1301 | AC012603.1 | 0.31081794 mirna_lnc  |
| 31258 hsa-mir-1301 | AC016205.1 | 0.303535237 mirna_lnc |
| 31259 hsa-mir-1301 | AC064836.3 | 0.526087328 mirna_lnc |
| 31260 hsa-mir-1301 | AC011290.1 | 0.302317338 mirna_lnc |
| 31261 hsa-mir-1301 | BX088651.4 | 0.420129901 mirna_lnc |
| 31262 hsa-mir-1301 | AC109326.1 | 0.315493629 mirna_lnc |
| 31263 hsa-mir-1301 | PIK3CD-AS2 | 0.328715641 mirna_lnc |
| 31264 hsa-mir-1301 | AC012640.5 | 0.432197009 mirna_lnc |
| 31265 hsa-mir-1301 | AL512408.1 | 0.530806301 mirna_lnc |

|                    |             |                       |
|--------------------|-------------|-----------------------|
| 31266 hsa-mir-1301 | AC090527.3  | 0.510099536 mirna_lnc |
| 31267 hsa-mir-1301 | AC087741.2  | 0.358862452 mirna_lnc |
| 31268 hsa-mir-1301 | AC010422.2  | 0.335449468 mirna_lnc |
| 31269 hsa-mir-1301 | AC010275.1  | 0.311449558 mirna_lnc |
| 31270 hsa-mir-1301 | AC100803.1  | 0.35475002 mirna_lnc  |
| 31271 hsa-mir-1301 | RNASEH1-AS1 | 0.466987848 mirna_lnc |
| 31272 hsa-mir-1301 | AC005379.1  | 0.338716227 mirna_lnc |
| 31273 hsa-mir-1301 | LINC01063   | 0.629769002 mirna_lnc |
| 31274 hsa-mir-1301 | AC131212.4  | 0.307359202 mirna_lnc |
| 31275 hsa-mir-1301 | AC092669.1  | 0.454415343 mirna_lnc |
| 31276 hsa-mir-1301 | CIRBP-AS1   | 0.492605339 mirna_lnc |
| 31277 hsa-mir-1301 | AC092171.5  | 0.372637404 mirna_lnc |
| 31278 hsa-mir-1301 | AC069213.1  | 0.40753878 mirna_lnc  |
| 31279 hsa-mir-1301 | AC091946.2  | 0.334681776 mirna_lnc |
| 31280 hsa-mir-1301 | AC099568.2  | 0.403378543 mirna_lnc |
| 31281 hsa-mir-1301 | AC020765.2  | 0.34217476 mirna_lnc  |
| 31282 hsa-mir-1301 | STPG3-AS1   | 0.329033984 mirna_lnc |
| 31283 hsa-mir-1301 | AL096828.3  | 0.411404594 mirna_lnc |
| 31284 hsa-mir-1301 | AC084757.2  | 0.453381017 mirna_lnc |
| 31285 hsa-mir-1301 | AC092171.3  | 0.380773189 mirna_lnc |
| 31286 hsa-mir-1301 | AC015802.4  | 0.355219114 mirna_lnc |
| 31287 hsa-mir-1301 | AL136040.1  | 0.348574472 mirna_lnc |
| 31288 hsa-mir-1301 | EIF2AK3-DT  | 0.491979269 mirna_lnc |
| 31289 hsa-mir-1301 | AC009171.2  | 0.460877828 mirna_lnc |
| 31290 hsa-mir-1301 | AC243830.2  | 0.415529399 mirna_lnc |
| 31291 hsa-mir-1301 | CNNM3-DT    | 0.532076336 mirna_lnc |
| 31292 hsa-mir-1301 | AC068831.6  | 0.382413395 mirna_lnc |
| 31293 hsa-mir-1301 | AL355482.2  | 0.410614371 mirna_lnc |
| 31294 hsa-mir-1301 | AC026691.1  | 0.303828597 mirna_lnc |
| 31295 hsa-mir-1301 | AC080013.5  | 0.405379236 mirna_lnc |
| 31296 hsa-mir-1301 | AL645608.4  | 0.439131248 mirna_lnc |
| 31297 hsa-mir-1301 | LINC02562   | 0.306256668 mirna_lnc |
| 31298 hsa-mir-1301 | AC138696.2  | 0.510098358 mirna_lnc |
| 31299 hsa-mir-1301 | LINC02163   | 0.340481844 mirna_lnc |
| 31300 hsa-mir-1301 | AC068987.4  | 0.379433032 mirna_lnc |
| 31301 hsa-mir-1301 | DGCR10      | 0.317937194 mirna_lnc |
| 31302 hsa-mir-1301 | AC007663.3  | 0.317612738 mirna_lnc |
| 31303 hsa-mir-1301 | MAST4-AS1   | 0.475776024 mirna_lnc |
| 31304 hsa-mir-1301 | LINC00884   | 0.356558409 mirna_lnc |
| 31305 hsa-mir-1301 | AC010654.1  | 0.396268165 mirna_lnc |
| 31306 hsa-mir-1301 | AC090774.2  | 0.428111044 mirna_lnc |
| 31307 hsa-mir-1301 | MCCC1-AS1   | 0.306761533 mirna_lnc |
| 31308 hsa-mir-1301 | STAM-AS1    | 0.304238884 mirna_lnc |
| 31309 hsa-mir-1301 | AC007773.1  | 0.472552256 mirna_lnc |
| 31310 hsa-mir-1301 | ATXN2-AS    | 0.357854073 mirna_lnc |
| 31311 hsa-mir-1301 | AC132938.1  | 0.322543408 mirna_lnc |
| 31312 hsa-mir-1301 | AC022762.1  | 0.393620961 mirna_lnc |
| 31313 hsa-mir-1301 | AL133243.3  | 0.317397817 mirna_lnc |
| 31314 hsa-mir-1301 | AC010883.1  | 0.322925011 mirna_lnc |
| 31315 hsa-mir-1301 | AC008267.5  | 0.434927015 mirna_lnc |
| 31316 hsa-mir-1301 | AC005695.3  | 0.385982489 mirna_lnc |
| 31317 hsa-mir-1301 | AC107214.1  | 0.439771186 mirna_lnc |
| 31318 hsa-mir-1301 | AC034236.2  | 0.447639792 mirna_lnc |
| 31319 hsa-mir-1301 | AC131235.3  | 0.386169993 mirna_lnc |



|                    |            |                       |
|--------------------|------------|-----------------------|
| 31320 hsa-mir-1301 | LINC00885  | 0.35078269 mirna_lnc  |
| 31321 hsa-mir-1301 | AL022324.3 | 0.323279504 mirna_lnc |
| 31322 hsa-mir-1301 | LINC01971  | 0.322593431 mirna_lnc |
| 31323 hsa-mir-1301 | AC072061.1 | 0.329790852 mirna_lnc |
| 31324 hsa-mir-1301 | AC005005.3 | 0.522871634 mirna_lnc |
| 31325 hsa-mir-1301 | AC073896.4 | 0.438978142 mirna_lnc |
| 31326 hsa-mir-1301 | C11orf72   | 0.349348945 mirna_lnc |
| 31327 hsa-mir-1301 | AP005328.2 | 0.362323239 mirna_lnc |
| 31328 hsa-mir-1301 | DDR1-DT    | 0.322193073 mirna_lnc |
| 31329 hsa-mir-1301 | AL139274.2 | 0.302532986 mirna_lnc |
| 31330 hsa-mir-1301 | AC108865.1 | 0.353829091 mirna_lnc |
| 31331 hsa-mir-1301 | URB1-AS1   | 0.488699632 mirna_lnc |
| 31332 hsa-mir-1301 | AC024243.1 | 0.440393574 mirna_lnc |
| 31333 hsa-mir-1301 | AC011446.1 | 0.395207761 mirna_lnc |
| 31334 hsa-mir-1301 | AL132712.2 | 0.400988192 mirna_lnc |
| 31335 hsa-mir-1301 | AC008736.2 | 0.496468566 mirna_lnc |
| 31336 hsa-mir-1301 | AL121906.2 | 0.307351346 mirna_lnc |
| 31337 hsa-mir-1301 | AC091271.1 | 0.530904625 mirna_lnc |
| 31338 hsa-mir-1301 | AL590399.1 | 0.412078423 mirna_lnc |
| 31339 hsa-mir-1301 | AC026304.1 | 0.485904998 mirna_lnc |
| 31340 hsa-mir-1301 | AC096992.2 | 0.470145886 mirna_lnc |
| 31341 hsa-mir-1301 | AL603832.1 | 0.310251514 mirna_lnc |
| 31342 hsa-mir-1301 | LPP-AS2    | 0.3911491 mirna_lnc   |
| 31343 hsa-mir-1301 | AC005304.3 | 0.359504994 mirna_lnc |
| 31344 hsa-mir-1301 | AC011445.1 | 0.415250347 mirna_lnc |
| 31345 hsa-mir-1301 | AC026803.2 | 0.346615151 mirna_lnc |
| 31346 hsa-mir-1301 | AC010186.1 | 0.538143535 mirna_lnc |
| 31347 hsa-mir-1301 | ELDR       | 0.525315003 mirna_lnc |
| 31348 hsa-mir-1301 | AC090617.5 | 0.401197378 mirna_lnc |
| 31349 hsa-mir-1301 | AP003170.3 | 0.34456852 mirna_lnc  |
| 31350 hsa-mir-1301 | AC019129.2 | 0.477017681 mirna_lnc |
| 31351 hsa-mir-1301 | AC005790.1 | 0.4593586 mirna_lnc   |
| 31352 hsa-mir-1301 | AC010336.2 | 0.333563391 mirna_lnc |
| 31353 hsa-mir-1301 | LBX2-AS1   | 0.302905396 mirna_lnc |
| 31354 hsa-mir-1301 | AP003086.2 | 0.334064065 mirna_lnc |
| 31355 hsa-mir-1301 | AP001775.2 | 0.45949933 mirna_lnc  |
| 31356 hsa-mir-1301 | AL132712.1 | 0.43948366 mirna_lnc  |
| 31357 hsa-mir-1301 | AC023355.1 | 0.501627885 mirna_lnc |
| 31358 hsa-mir-1301 | AL606760.3 | 0.31840405 mirna_lnc  |
| 31359 hsa-mir-1301 | AC093677.2 | 0.544488025 mirna_lnc |
| 31360 hsa-mir-1301 | AC023509.3 | 0.360167101 mirna_lnc |
| 31361 hsa-mir-1301 | Z73429.1   | 0.301279941 mirna_lnc |
| 31362 hsa-mir-1301 | AC018766.1 | 0.301347841 mirna_lnc |
| 31363 hsa-mir-1301 | AL135905.1 | 0.366813474 mirna_lnc |
| 31364 hsa-mir-1301 | AC083805.3 | 0.309057579 mirna_lnc |
| 31365 hsa-mir-1301 | AC090907.2 | 0.35771549 mirna_lnc  |
| 31366 hsa-mir-1301 | IQCA1-AS1  | 0.461446521 mirna_lnc |
| 31367 hsa-mir-1301 | INTS6L-AS1 | 0.392187338 mirna_lnc |
| 31368 hsa-mir-1301 | AP006545.2 | 0.348924828 mirna_lnc |
| 31369 hsa-mir-1301 | AC011700.1 | 0.318792335 mirna_lnc |
| 31370 hsa-mir-1301 | AC025166.1 | 0.332747604 mirna_lnc |
| 31371 hsa-mir-1301 | AL031186.1 | 0.328047604 mirna_lnc |
| 31372 hsa-mir-1301 | AC083880.1 | 0.498626659 mirna_lnc |
| 31373 hsa-mir-1301 | TERC       | 0.387729146 mirna_lnc |

|                    |            |                       |
|--------------------|------------|-----------------------|
| 31374 hsa-mir-1301 | AL121601.1 | 0.410651502 mirna_lnc |
| 31375 hsa-mir-1301 | AC099522.2 | 0.333218907 mirna_lnc |
| 31376 hsa-mir-1301 | AL606970.1 | 0.307688965 mirna_lnc |
| 31377 hsa-mir-1301 | AP001547.1 | 0.33229946 mirna_lnc  |
| 31378 hsa-mir-1301 | RB1-DT     | 0.310362229 mirna_lnc |
| 31379 hsa-mir-1301 | LINC01607  | 0.505756221 mirna_lnc |
| 31380 hsa-mir-1301 | AC145423.3 | 0.315415806 mirna_lnc |
| 31381 hsa-mir-1301 | AL136038.3 | 0.324374403 mirna_lnc |
| 31382 hsa-mir-1301 | AC007541.1 | 0.38125212 mirna_lnc  |
| 31383 hsa-mir-1301 | AL606537.1 | 0.329742654 mirna_lnc |
| 31384 hsa-mir-1301 | AL161729.2 | 0.325212028 mirna_lnc |
| 31385 hsa-mir-1301 | AC007389.5 | 0.495433616 mirna_lnc |
| 31386 hsa-mir-1301 | AC108865.2 | 0.55521312 mirna_lnc  |
| 31387 hsa-mir-1301 | AC092447.5 | 0.367441224 mirna_lnc |
| 31388 hsa-mir-1301 | AC010834.2 | 0.491347824 mirna_lnc |
| 31389 hsa-mir-1301 | AL022341.1 | 0.362866979 mirna_lnc |
| 31390 hsa-mir-1301 | AC008883.1 | 0.328354957 mirna_lnc |
| 31391 hsa-mir-1301 | AP000251.1 | 0.51568501 mirna_lnc  |
| 31392 hsa-mir-1301 | AL390195.1 | 0.328125328 mirna_lnc |
| 31393 hsa-mir-1301 | AC025575.2 | 0.307727507 mirna_lnc |
| 31394 hsa-mir-1301 | BX005266.2 | 0.366518951 mirna_lnc |
| 31395 hsa-mir-1301 | CPNE8-AS1  | 0.444166485 mirna_lnc |
| 31396 hsa-mir-1301 | AC118658.1 | 0.35514092 mirna_lnc  |
| 31397 hsa-mir-1301 | AL138881.1 | 0.530698936 mirna_lnc |
| 31398 hsa-mir-1301 | AC036214.1 | 0.347504195 mirna_lnc |
| 31399 hsa-mir-1301 | LINC01465  | 0.313035605 mirna_lnc |
| 31400 hsa-mir-1301 | AC087276.3 | 0.343107669 mirna_lnc |
| 31401 hsa-mir-1301 | AC090907.1 | 0.536537617 mirna_lnc |
| 31402 hsa-mir-1301 | AC093635.1 | 0.469560859 mirna_lnc |
| 31403 hsa-mir-1301 | LINC01715  | 0.517084121 mirna_lnc |
| 31404 hsa-mir-1301 | AC009560.1 | 0.404689043 mirna_lnc |
| 31405 hsa-mir-1301 | AL590822.1 | 0.442754759 mirna_lnc |
| 31406 hsa-mir-1301 | AC093510.1 | 0.373706242 mirna_lnc |
| 31407 hsa-mir-1301 | BRWD1-AS2  | 0.430730563 mirna_lnc |
| 31408 hsa-mir-1301 | LINC01144  | 0.359983267 mirna_lnc |
| 31409 hsa-mir-1301 | PITPNA-AS1 | 0.300857892 mirna_lnc |
| 31410 hsa-mir-1301 | AL157813.1 | 0.326295231 mirna_lnc |
| 31411 hsa-mir-1301 | AC027644.3 | 0.508401807 mirna_lnc |
| 31412 hsa-mir-1301 | AGBL5-AS1  | 0.324326634 mirna_lnc |
| 31413 hsa-mir-1301 | AC079174.2 | 0.392325078 mirna_lnc |
| 31414 hsa-mir-1301 | AC004263.1 | 0.330784915 mirna_lnc |
| 31415 hsa-mir-1301 | AL513548.1 | 0.332753447 mirna_lnc |
| 31416 hsa-mir-1301 | AC007114.1 | 0.357321468 mirna_lnc |
| 31417 hsa-mir-1301 | AC096540.1 | 0.399595143 mirna_lnc |
| 31418 hsa-mir-1301 | SCAT8      | 0.604308127 mirna_lnc |
| 31419 hsa-mir-1301 | AL356488.3 | 0.58106132 mirna_lnc  |
| 31420 hsa-mir-1301 | MANEA-DT   | 0.309758824 mirna_lnc |
| 31421 hsa-mir-1301 | AC004969.1 | 0.3407095 mirna_lnc   |
| 31422 hsa-mir-1301 | AC069277.1 | 0.438182815 mirna_lnc |
| 31423 hsa-mir-1301 | AL032819.1 | 0.55039757 mirna_lnc  |
| 31424 hsa-mir-1301 | AL844908.2 | 0.514298236 mirna_lnc |
| 31425 hsa-mir-1301 | AL355001.2 | 0.360984367 mirna_lnc |
| 31426 hsa-mir-1301 | AC092119.3 | 0.442418146 mirna_lnc |
| 31427 hsa-mir-1301 | AC069307.1 | 0.384894318 mirna_lnc |

|                    |             |                        |
|--------------------|-------------|------------------------|
| 31428 hsa-mir-1301 | AC099343. 3 | 0. 413409188 mirna_lnc |
| 31429 hsa-mir-1301 | AC079834. 2 | 0. 356120674 mirna_lnc |
| 31430 hsa-mir-1301 | HDAC4-AS1   | 0. 418125095 mirna_lnc |
| 31431 hsa-mir-1301 | AL021154. 1 | 0. 534450758 mirna_lnc |
| 31432 hsa-mir-1301 | AL359198. 1 | 0. 388530529 mirna_lnc |
| 31433 hsa-mir-1301 | AC004012. 1 | 0. 599993378 mirna_lnc |
| 31434 hsa-mir-1301 | AL118511. 1 | 0. 385456902 mirna_lnc |
| 31435 hsa-mir-1301 | Z83847. 1   | 0. 308622369 mirna_lnc |
| 31436 hsa-mir-1301 | AC087276. 1 | 0. 345306727 mirna_lnc |
| 31437 hsa-mir-1301 | AC090739. 1 | 0. 3371639 mirna_lnc   |
| 31438 hsa-mir-1301 | AL583808. 1 | 0. 467390161 mirna_lnc |
| 31439 hsa-mir-1301 | AC245014. 3 | 0. 374990669 mirna_lnc |
| 31440 hsa-mir-1301 | AC068620. 2 | 0. 354527978 mirna_lnc |
| 31441 hsa-mir-1301 | AP003392. 3 | 0. 459465342 mirna_lnc |
| 31442 hsa-mir-1301 | AP005205. 3 | 0. 374463153 mirna_lnc |
| 31443 hsa-mir-1301 | AC005034. 4 | 0. 398864446 mirna_lnc |
| 31444 hsa-mir-1301 | AC025580. 3 | 0. 3704576 mirna_lnc   |
| 31445 hsa-mir-1301 | AC068620. 1 | 0. 321650013 mirna_lnc |
| 31446 hsa-mir-1301 | AC025265. 1 | 0. 31298009 mirna_lnc  |
| 31447 hsa-mir-1301 | GIHCG       | 0. 345986695 mirna_lnc |
| 31448 hsa-mir-1301 | Z93241. 1   | 0. 390537354 mirna_lnc |
| 31449 hsa-mir-1301 | AL627171. 1 | 0. 303435742 mirna_lnc |
| 31450 hsa-mir-1301 | AC110285. 2 | 0. 422588162 mirna_lnc |
| 31451 hsa-mir-1301 | AL359878. 2 | 0. 479128769 mirna_lnc |
| 31452 hsa-mir-1301 | LINC02470   | 0. 306716193 mirna_lnc |
| 31453 hsa-mir-1301 | AC068338. 2 | 0. 372076513 mirna_lnc |
| 31454 hsa-mir-1301 | AC134682. 1 | 0. 300808641 mirna_lnc |
| 31455 hsa-mir-1301 | AL731537. 1 | 0. 529085197 mirna_lnc |
| 31456 hsa-mir-1301 | GTSE1-DT    | 0. 395396235 mirna_lnc |
| 31457 hsa-mir-1301 | AC010643. 1 | 0. 325946256 mirna_lnc |
| 31458 hsa-mir-1301 | AC135178. 5 | 0. 442999481 mirna_lnc |
| 31459 hsa-mir-1301 | KCNJ2-AS1   | 0. 51796463 mirna_lnc  |
| 31460 hsa-mir-1301 | AC074135. 1 | 0. 304880972 mirna_lnc |
| 31461 hsa-mir-1301 | C8orf37-AS1 | 0. 35176823 mirna_lnc  |
| 31462 hsa-mir-1301 | AC002059. 1 | 0. 606558902 mirna_lnc |
| 31463 hsa-mir-1301 | AL645608. 6 | 0. 458327173 mirna_lnc |
| 31464 hsa-mir-1301 | AC092652. 1 | 0. 338771247 mirna_lnc |
| 31465 hsa-mir-1301 | AC231981. 1 | 0. 323904564 mirna_lnc |
| 31466 hsa-mir-1301 | AC000120. 1 | 0. 375831324 mirna_lnc |
| 31467 hsa-mir-1301 | AC010980. 2 | 0. 440720986 mirna_lnc |
| 31468 hsa-mir-1301 | AC025162. 2 | 0. 404569021 mirna_lnc |
| 31469 hsa-mir-1301 | PARD3-AS1   | 0. 328965437 mirna_lnc |
| 31470 hsa-mir-1301 | AC090061. 1 | 0. 324275141 mirna_lnc |
| 31471 hsa-mir-1301 | AC136604. 3 | 0. 391718255 mirna_lnc |
| 31472 hsa-mir-1301 | AC007497. 1 | 0. 315901612 mirna_lnc |
| 31473 hsa-mir-1301 | AC005197. 1 | 0. 397680162 mirna_lnc |
| 31474 hsa-mir-1301 | AC069224. 1 | 0. 344533161 mirna_lnc |
| 31475 hsa-mir-1301 | AC145422. 1 | 0. 383119637 mirna_lnc |
| 31476 hsa-mir-1301 | AC145423. 2 | 0. 451564497 mirna_lnc |
| 31477 hsa-mir-1301 | AC092142. 1 | 0. 426614001 mirna_lnc |
| 31478 hsa-mir-1301 | AL163953. 1 | 0. 312176128 mirna_lnc |
| 31479 hsa-mir-1301 | AC012313. 9 | 0. 315654074 mirna_lnc |
| 31480 hsa-mir-1301 | CYP51A1-AS1 | 0. 568148563 mirna_lnc |
| 31481 hsa-mir-1301 | AC005696. 4 | 0. 483625623 mirna_lnc |

|                    |            |                       |
|--------------------|------------|-----------------------|
| 31482 hsa-mir-1301 | AL512791.2 | 0.439699004 mirna_lnc |
| 31483 hsa-mir-1301 | AP001893.3 | 0.334489755 mirna_lnc |
| 31484 hsa-mir-1301 | RN7SL832P  | 0.593965944 mirna_lnc |
| 31485 hsa-mir-1301 | LINC02094  | 0.33035957 mirna_lnc  |
| 31486 hsa-mir-1301 | LINC02076  | 0.315616653 mirna_lnc |
| 31487 hsa-mir-1301 | AC008555.2 | 0.417147742 mirna_lnc |
| 31488 hsa-mir-1301 | AL138966.2 | 0.397306255 mirna_lnc |
| 31489 hsa-mir-1301 | AL358933.1 | 0.367503928 mirna_lnc |
| 31490 hsa-mir-1301 | AP001922.5 | 0.350529667 mirna_lnc |
| 31491 hsa-mir-1301 | AC084819.1 | 0.316377153 mirna_lnc |
| 31492 hsa-mir-1301 | AL512598.1 | 0.338908217 mirna_lnc |
| 31493 hsa-mir-1301 | LINC00112  | 0.324621938 mirna_lnc |
| 31494 hsa-mir-1301 | AP001972.4 | 0.475079305 mirna_lnc |
| 31495 hsa-mir-1301 | AL590705.3 | 0.594078956 mirna_lnc |
| 31496 hsa-mir-1301 | AL132655.1 | 0.316136081 mirna_lnc |
| 31497 hsa-mir-1301 | AL121832.1 | 0.311466835 mirna_lnc |
| 31498 hsa-mir-1301 | AC106782.2 | 0.353309102 mirna_lnc |
| 31499 hsa-mir-1301 | GLIS2-AS1  | 0.319833396 mirna_lnc |
| 31500 hsa-mir-1301 | AC008752.1 | 0.304617847 mirna_lnc |
| 31501 hsa-mir-1301 | LINC00900  | 0.350596435 mirna_lnc |
| 31502 hsa-mir-1301 | AL645608.2 | 0.397414705 mirna_lnc |
| 31503 hsa-mir-1301 | SEC23A-AS1 | 0.324696301 mirna_lnc |
| 31504 hsa-mir-1301 | AC079610.2 | 0.311654545 mirna_lnc |
| 31505 hsa-mir-1301 | AC015917.2 | 0.433357937 mirna_lnc |
| 31506 hsa-mir-1301 | AP001412.1 | 0.342198298 mirna_lnc |
| 31507 hsa-mir-1301 | TOLLIP-AS1 | 0.448028845 mirna_lnc |
| 31508 hsa-mir-1301 | AC011247.1 | 0.314334402 mirna_lnc |
| 31509 hsa-mir-1301 | AC021092.1 | 0.434685232 mirna_lnc |
| 31510 hsa-mir-1301 | AC006449.6 | 0.313756289 mirna_lnc |
| 31511 hsa-mir-1301 | AC137767.1 | 0.353229964 mirna_lnc |
| 31512 hsa-mir-1301 | SNHG9      | 0.326532048 mirna_lnc |
| 31513 hsa-mir-1301 | AC099684.2 | 0.383706341 mirna_lnc |
| 31514 hsa-mir-1301 | AC108704.1 | 0.339655083 mirna_lnc |
| 31515 hsa-mir-1301 | AC012676.3 | 0.458665945 mirna_lnc |
| 31516 hsa-mir-99a  | AC103746.1 | 0.692162609 mirna_lnc |
| 31517 hsa-mir-99a  | AL023973.1 | 0.309177766 mirna_lnc |
| 31518 hsa-mir-99a  | AC129492.5 | 0.44659389 mirna_lnc  |
| 31519 hsa-mir-99a  | LINC02593  | 0.697106431 mirna_lnc |
| 31520 hsa-mir-99a  | AL160286.2 | 0.315990548 mirna_lnc |
| 31521 hsa-mir-99a  | AJ006995.1 | 0.444767947 mirna_lnc |
| 31522 hsa-mir-99a  | LINC01560  | 0.313452947 mirna_lnc |
| 31523 hsa-mir-99a  | AC006942.1 | 0.315480979 mirna_lnc |
| 31524 hsa-mir-99a  | PACRG-AS1  | 0.473632019 mirna_lnc |
| 31525 hsa-mir-99a  | LINC01625  | 0.718596977 mirna_lnc |
| 31526 hsa-mir-99a  | AC008121.2 | 0.301728438 mirna_lnc |
| 31527 hsa-mir-99a  | AC012409.2 | 0.531643358 mirna_lnc |
| 31528 hsa-mir-99a  | TNRC6C-AS1 | 0.362281426 mirna_lnc |
| 31529 hsa-mir-99a  | LOH12CR2   | 0.448083905 mirna_lnc |
| 31530 hsa-mir-99a  | AC016251.2 | 0.374366737 mirna_lnc |
| 31531 hsa-mir-99a  | AC008105.1 | 0.392625914 mirna_lnc |
| 31532 hsa-mir-99a  | LINC01311  | 0.316623666 mirna_lnc |
| 31533 hsa-mir-99a  | AC139768.2 | 0.312506573 mirna_lnc |
| 31534 hsa-mir-99a  | AC096733.2 | 0.330296453 mirna_lnc |
| 31535 hsa-mir-99a  | TFAP2A-AS1 | 0.385771133 mirna_lnc |

|                   |             |                       |
|-------------------|-------------|-----------------------|
| 31536 hsa-mir-99a | AC022387.1  | 0.480564146 mirna_lnc |
| 31537 hsa-mir-99a | AC063977.6  | 0.345768047 mirna_lnc |
| 31538 hsa-mir-99a | AC002066.1  | 0.404293457 mirna_lnc |
| 31539 hsa-mir-99a | FAM66D      | 0.414317564 mirna_lnc |
| 31540 hsa-mir-99a | AL139288.1  | 0.52481017 mirna_lnc  |
| 31541 hsa-mir-99a | MAFA-AS1    | 0.377517234 mirna_lnc |
| 31542 hsa-mir-99a | AC104667.1  | 0.507724229 mirna_lnc |
| 31543 hsa-mir-99a | AC098828.2  | 0.321937437 mirna_lnc |
| 31544 hsa-mir-99a | AL137802.2  | 0.483695842 mirna_lnc |
| 31545 hsa-mir-99a | AC004069.1  | 0.329880273 mirna_lnc |
| 31546 hsa-mir-99a | AC093642.2  | 0.672838411 mirna_lnc |
| 31547 hsa-mir-99a | AL157823.2  | 0.48138709 mirna_lnc  |
| 31548 hsa-mir-99a | AP000553.2  | 0.659000323 mirna_lnc |
| 31549 hsa-mir-99a | LINC02175   | 0.566580261 mirna_lnc |
| 31550 hsa-mir-99a | AC110813.1  | 0.668885062 mirna_lnc |
| 31551 hsa-mir-99a | LINC01126   | 0.414598251 mirna_lnc |
| 31552 hsa-mir-99a | LINC01087   | 0.502603647 mirna_lnc |
| 31553 hsa-mir-99a | AC135803.1  | 0.69986902 mirna_lnc  |
| 31554 hsa-mir-99a | AL133243.2  | 0.304594321 mirna_lnc |
| 31555 hsa-mir-99a | SYNGAP1-AS1 | 0.334487454 mirna_lnc |
| 31556 hsa-mir-99a | MAGEA4-AS1  | 0.379264565 mirna_lnc |
| 31557 hsa-mir-99a | AC105339.5  | 0.501472493 mirna_lnc |
| 31558 hsa-mir-99a | AL359643.3  | 0.311066433 mirna_lnc |
| 31559 hsa-mir-99a | AC005332.4  | 0.337331203 mirna_lnc |
| 31560 hsa-mir-99a | AC090578.2  | 0.596495345 mirna_lnc |
| 31561 hsa-mir-99a | AL078605.1  | 0.516338756 mirna_lnc |
| 31562 hsa-mir-99a | AC026254.2  | 0.307961565 mirna_lnc |
| 31563 hsa-mir-99a | AL138760.1  | 0.384388122 mirna_lnc |
| 31564 hsa-mir-99a | LINC01686   | 0.326253143 mirna_lnc |
| 31565 hsa-mir-99a | Z95115.1    | 0.51250187 mirna_lnc  |
| 31566 hsa-mir-99a | LINC01143   | 0.497534523 mirna_lnc |
| 31567 hsa-mir-99a | AC079145.1  | 0.374976441 mirna_lnc |
| 31568 hsa-mir-99a | AC005695.1  | 0.334125853 mirna_lnc |
| 31569 hsa-mir-99a | AC020907.5  | 0.504142339 mirna_lnc |
| 31570 hsa-mir-99a | UBR5-AS1    | 0.315226503 mirna_lnc |
| 31571 hsa-mir-99a | AC130650.2  | 0.403371803 mirna_lnc |
| 31572 hsa-mir-99a | AL008721.2  | 0.374474726 mirna_lnc |
| 31573 hsa-mir-99a | AC110769.2  | 0.420310565 mirna_lnc |
| 31574 hsa-mir-99a | AL138762.1  | 0.384659519 mirna_lnc |
| 31575 hsa-mir-99a | AC007996.1  | 0.479833689 mirna_lnc |
| 31576 hsa-mir-99a | AC096642.1  | 0.35958628 mirna_lnc  |
| 31577 hsa-mir-99a | LINC01521   | 0.350733491 mirna_lnc |
| 31578 hsa-mir-99a | AC016708.1  | 0.731630456 mirna_lnc |
| 31579 hsa-mir-99a | AC091057.2  | 0.347534201 mirna_lnc |
| 31580 hsa-mir-99a | AC009506.1  | 0.513801214 mirna_lnc |
| 31581 hsa-mir-99a | AC007848.1  | 0.388071159 mirna_lnc |
| 31582 hsa-mir-99a | AC099786.1  | 0.704286347 mirna_lnc |
| 31583 hsa-mir-99a | AC063948.1  | 0.347892556 mirna_lnc |
| 31584 hsa-mir-99a | AC087742.1  | 0.374866848 mirna_lnc |
| 31585 hsa-mir-99a | AL354892.2  | 0.356071421 mirna_lnc |
| 31586 hsa-mir-99a | AP001330.5  | 0.34738324 mirna_lnc  |
| 31587 hsa-mir-99a | AC011773.4  | 0.402336977 mirna_lnc |
| 31588 hsa-mir-99a | AC015802.3  | 0.33977926 mirna_lnc  |
| 31589 hsa-mir-99a | AL513365.2  | 0.334648563 mirna_lnc |

|                   |            |                       |
|-------------------|------------|-----------------------|
| 31590 hsa-mir-99a | AC064836.3 | 0.33132735 mirna_lnc  |
| 31591 hsa-mir-99a | BX088651.4 | 0.3253941 mirna_lnc   |
| 31592 hsa-mir-99a | AL512408.1 | 0.330926843 mirna_lnc |
| 31593 hsa-mir-99a | AC023034.2 | 0.4321962 mirna_lnc   |
| 31594 hsa-mir-99a | AC092068.3 | 0.331954142 mirna_lnc |
| 31595 hsa-mir-99a | AC246793.1 | 0.425613269 mirna_lnc |
| 31596 hsa-mir-99a | AC105339.3 | 0.320998598 mirna_lnc |
| 31597 hsa-mir-99a | AC131532.1 | 0.381097505 mirna_lnc |
| 31598 hsa-mir-99a | ERICD      | 0.507611394 mirna_lnc |
| 31599 hsa-mir-99a | AL662795.2 | 0.357465056 mirna_lnc |
| 31600 hsa-mir-99a | AC006262.1 | 0.305574101 mirna_lnc |
| 31601 hsa-mir-99a | LINC02600  | 0.343329517 mirna_lnc |
| 31602 hsa-mir-99a | AC092608.1 | 0.390311942 mirna_lnc |
| 31603 hsa-mir-99a | PCOLCE-AS1 | 0.347235008 mirna_lnc |
| 31604 hsa-mir-99a | Z93930.3   | 0.423427874 mirna_lnc |
| 31605 hsa-mir-99a | AL136040.1 | 0.395731496 mirna_lnc |
| 31606 hsa-mir-99a | AC092068.2 | 0.324356361 mirna_lnc |
| 31607 hsa-mir-99a | AC073389.1 | 0.437627831 mirna_lnc |
| 31608 hsa-mir-99a | DNM3-IT1   | 0.652818669 mirna_lnc |
| 31609 hsa-mir-99a | AC006206.1 | 0.377952039 mirna_lnc |
| 31610 hsa-mir-99a | AC090772.4 | 0.416197221 mirna_lnc |
| 31611 hsa-mir-99a | UBE2D3-AS1 | 0.315678693 mirna_lnc |
| 31612 hsa-mir-99a | AL451064.1 | 0.694480047 mirna_lnc |
| 31613 hsa-mir-99a | AC084876.2 | 0.347216715 mirna_lnc |
| 31614 hsa-mir-99a | AL442128.2 | 0.300924743 mirna_lnc |
| 31615 hsa-mir-99a | AC026691.1 | 0.339296509 mirna_lnc |
| 31616 hsa-mir-99a | AL645608.4 | 0.636174918 mirna_lnc |
| 31617 hsa-mir-99a | AC005730.2 | 0.317878232 mirna_lnc |
| 31618 hsa-mir-99a | AC008115.1 | 0.313501359 mirna_lnc |
| 31619 hsa-mir-99a | AC126407.1 | 0.318167029 mirna_lnc |
| 31620 hsa-mir-99a | AP001029.1 | 0.363892269 mirna_lnc |
| 31621 hsa-mir-99a | AC007663.3 | 0.614822325 mirna_lnc |
| 31622 hsa-mir-99a | AL590787.1 | 0.373361647 mirna_lnc |
| 31623 hsa-mir-99a | AC009120.5 | 0.377039437 mirna_lnc |
| 31624 hsa-mir-99a | AC093821.1 | 0.38446226 mirna_lnc  |
| 31625 hsa-mir-99a | AP000253.1 | 0.392345494 mirna_lnc |
| 31626 hsa-mir-99a | AC034102.5 | 0.314665981 mirna_lnc |
| 31627 hsa-mir-99a | AL138831.1 | 0.48183104 mirna_lnc  |
| 31628 hsa-mir-99a | AC010883.1 | 0.331606102 mirna_lnc |
| 31629 hsa-mir-99a | AP001178.3 | 0.31890768 mirna_lnc  |
| 31630 hsa-mir-99a | AC010735.1 | 0.551023055 mirna_lnc |
| 31631 hsa-mir-99a | AC079600.3 | 0.494417362 mirna_lnc |
| 31632 hsa-mir-99a | FAM66E     | 0.316432109 mirna_lnc |
| 31633 hsa-mir-99a | AC022916.1 | 0.331832932 mirna_lnc |
| 31634 hsa-mir-99a | AL022324.3 | 0.452809332 mirna_lnc |
| 31635 hsa-mir-99a | AC105118.1 | 0.421291703 mirna_lnc |
| 31636 hsa-mir-99a | AC007391.1 | 0.329233474 mirna_lnc |
| 31637 hsa-mir-99a | AC005005.3 | 0.345236149 mirna_lnc |
| 31638 hsa-mir-99a | AC100814.1 | 0.302245848 mirna_lnc |
| 31639 hsa-mir-99a | UFL1-AS1   | 0.313265476 mirna_lnc |
| 31640 hsa-mir-99a | LINC01800  | 0.313014729 mirna_lnc |
| 31641 hsa-mir-99a | AC008736.2 | 0.346061255 mirna_lnc |
| 31642 hsa-mir-99a | LINC01771  | 0.324701885 mirna_lnc |
| 31643 hsa-mir-99a | LINC01238  | 0.573221928 mirna_lnc |

|                   |            |                       |
|-------------------|------------|-----------------------|
| 31644 hsa-mir-99a | ATP2B1-AS1 | 0.43730258 mirna_lnc  |
| 31645 hsa-mir-99a | AP001029.2 | 0.368234325 mirna_lnc |
| 31646 hsa-mir-99a | AP000255.1 | 0.748088807 mirna_lnc |
| 31647 hsa-mir-99a | AL132765.2 | 0.415494877 mirna_lnc |
| 31648 hsa-mir-99a | AC104072.1 | 0.516434385 mirna_lnc |
| 31649 hsa-mir-99a | HHIP-AS1   | 0.307537891 mirna_lnc |
| 31650 hsa-mir-99a | CAHM       | 0.375777376 mirna_lnc |
| 31651 hsa-mir-99a | AP005329.2 | 0.420967312 mirna_lnc |
| 31652 hsa-mir-99a | AC010336.2 | 0.329526843 mirna_lnc |
| 31653 hsa-mir-99a | AC090772.1 | 0.310928598 mirna_lnc |
| 31654 hsa-mir-99a | AC073389.2 | 0.4504773 mirna_lnc   |
| 31655 hsa-mir-99a | AL031658.1 | 0.624747364 mirna_lnc |
| 31656 hsa-mir-99a | AC010997.4 | 0.599095717 mirna_lnc |
| 31657 hsa-mir-99a | HCG14      | 0.363165023 mirna_lnc |
| 31658 hsa-mir-99a | AC068473.5 | 0.388454194 mirna_lnc |
| 31659 hsa-mir-99a | AC010997.5 | 0.3429416 mirna_lnc   |
| 31660 hsa-mir-99a | HM13-AS1   | 0.324740525 mirna_lnc |
| 31661 hsa-mir-99a | AC092849.1 | 0.319592512 mirna_lnc |
| 31662 hsa-mir-99a | AC233976.1 | 0.338930882 mirna_lnc |
| 31663 hsa-mir-99a | TTC39C-AS1 | 0.655353896 mirna_lnc |
| 31664 hsa-mir-99a | AP000962.1 | 0.442844703 mirna_lnc |
| 31665 hsa-mir-99a | RB1-DT     | 0.413162773 mirna_lnc |
| 31666 hsa-mir-99a | AC023632.2 | 0.345143898 mirna_lnc |
| 31667 hsa-mir-99a | PAN3-AS1   | 0.437726889 mirna_lnc |
| 31668 hsa-mir-99a | AL161729.3 | 0.302391247 mirna_lnc |
| 31669 hsa-mir-99a | AC092447.5 | 0.548311765 mirna_lnc |
| 31670 hsa-mir-99a | AC006511.3 | 0.377202445 mirna_lnc |
| 31671 hsa-mir-99a | AC092111.2 | 0.372624729 mirna_lnc |
| 31672 hsa-mir-99a | AC010336.5 | 0.622561381 mirna_lnc |
| 31673 hsa-mir-99a | AC107464.3 | 0.677999755 mirna_lnc |
| 31674 hsa-mir-99a | AL513534.2 | 0.377613605 mirna_lnc |
| 31675 hsa-mir-99a | AC025219.1 | 0.329238859 mirna_lnc |
| 31676 hsa-mir-99a | LINC01901  | 0.589534899 mirna_lnc |
| 31677 hsa-mir-99a | AC022400.8 | 0.376953778 mirna_lnc |
| 31678 hsa-mir-99a | AC107032.2 | 0.377498783 mirna_lnc |
| 31679 hsa-mir-99a | LINC01465  | 0.422736418 mirna_lnc |
| 31680 hsa-mir-99a | ZNF503-AS2 | 0.404148883 mirna_lnc |
| 31681 hsa-mir-99a | AL158063.1 | 0.381349085 mirna_lnc |
| 31682 hsa-mir-99a | ERVK9-11   | 0.321897512 mirna_lnc |
| 31683 hsa-mir-99a | OBSCN-AS1  | 0.301172179 mirna_lnc |
| 31684 hsa-mir-99a | AC120057.4 | 0.351642967 mirna_lnc |
| 31685 hsa-mir-99a | AC109347.1 | 0.349750869 mirna_lnc |
| 31686 hsa-mir-99a | AL158055.1 | 0.365774346 mirna_lnc |
| 31687 hsa-mir-99a | AP000962.2 | 0.49064529 mirna_lnc  |
| 31688 hsa-mir-99a | AL512625.1 | 0.409062443 mirna_lnc |
| 31689 hsa-mir-99a | LINC01144  | 0.365411738 mirna_lnc |
| 31690 hsa-mir-99a | AL008721.1 | 0.327788308 mirna_lnc |
| 31691 hsa-mir-99a | AF127577.5 | 0.48179283 mirna_lnc  |
| 31692 hsa-mir-99a | FGF12-AS3  | 0.404743996 mirna_lnc |
| 31693 hsa-mir-99a | AC092119.2 | 0.342088379 mirna_lnc |
| 31694 hsa-mir-99a | AL355490.2 | 0.355111516 mirna_lnc |
| 31695 hsa-mir-99a | AC079610.1 | 0.344616357 mirna_lnc |
| 31696 hsa-mir-99a | SMC2-AS1   | 0.538482288 mirna_lnc |
| 31697 hsa-mir-99a | AC110619.1 | 0.362649196 mirna_lnc |

|                   |             |                       |
|-------------------|-------------|-----------------------|
| 31698 hsa-mir-99a | AC107068.1  | 0.423251063 mirna_lnc |
| 31699 hsa-mir-99a | AC090579.1  | 0.342129539 mirna_lnc |
| 31700 hsa-mir-99a | MANEA-DT    | 0.363309994 mirna_lnc |
| 31701 hsa-mir-99a | AL049796.1  | 0.383077464 mirna_lnc |
| 31702 hsa-mir-99a | AL136531.1  | 0.398143049 mirna_lnc |
| 31703 hsa-mir-99a | AC133550.2  | 0.334457397 mirna_lnc |
| 31704 hsa-mir-99a | AL451062.1  | 0.357813153 mirna_lnc |
| 31705 hsa-mir-99a | AC092119.3  | 0.32491087 mirna_lnc  |
| 31706 hsa-mir-99a | MAGEA8-AS1  | 0.590543336 mirna_lnc |
| 31707 hsa-mir-99a | AC116348.1  | 0.37998909 mirna_lnc  |
| 31708 hsa-mir-99a | Z83847.1    | 0.314663581 mirna_lnc |
| 31709 hsa-mir-99a | AC004925.1  | 0.539215224 mirna_lnc |
| 31710 hsa-mir-99a | AP001605.1  | 0.332578145 mirna_lnc |
| 31711 hsa-mir-99a | Z99129.3    | 0.426155669 mirna_lnc |
| 31712 hsa-mir-99a | AC093462.1  | 0.315614183 mirna_lnc |
| 31713 hsa-mir-99a | AP000350.5  | 0.555153584 mirna_lnc |
| 31714 hsa-mir-99a | AC073389.3  | 0.617447291 mirna_lnc |
| 31715 hsa-mir-99a | AC005034.4  | 0.334912604 mirna_lnc |
| 31716 hsa-mir-99a | AC011005.4  | 0.315892785 mirna_lnc |
| 31717 hsa-mir-99a | AC104794.2  | 0.400703329 mirna_lnc |
| 31718 hsa-mir-99a | MAPT-IT1    | 0.570669365 mirna_lnc |
| 31719 hsa-mir-99a | AL627171.1  | 0.354434431 mirna_lnc |
| 31720 hsa-mir-99a | AL451069.1  | 0.377404678 mirna_lnc |
| 31721 hsa-mir-99a | AC009312.1  | 0.424574985 mirna_lnc |
| 31722 hsa-mir-99a | AC098484.2  | 0.311669753 mirna_lnc |
| 31723 hsa-mir-99a | AL359510.2  | 0.322169734 mirna_lnc |
| 31724 hsa-mir-99a | AP000350.7  | 0.534290513 mirna_lnc |
| 31725 hsa-mir-99a | AL096701.3  | 0.357640988 mirna_lnc |
| 31726 hsa-mir-99a | AC079414.3  | 0.401870127 mirna_lnc |
| 31727 hsa-mir-99a | AC108134.4  | 0.354917586 mirna_lnc |
| 31728 hsa-mir-99a | AC020978.1  | 0.354401218 mirna_lnc |
| 31729 hsa-mir-99a | AL138831.3  | 0.488952353 mirna_lnc |
| 31730 hsa-mir-99a | AC017100.1  | 0.356162295 mirna_lnc |
| 31731 hsa-mir-99a | AC079601.1  | 0.336409479 mirna_lnc |
| 31732 hsa-mir-99a | AL138831.2  | 0.512046985 mirna_lnc |
| 31733 hsa-mir-99a | LINC01447   | 0.348009764 mirna_lnc |
| 31734 hsa-mir-99a | LINC00173   | 0.35450231 mirna_lnc  |
| 31735 hsa-mir-99a | AC005006.1  | 0.338026027 mirna_lnc |
| 31736 hsa-mir-99a | AL645608.6  | 0.610258176 mirna_lnc |
| 31737 hsa-mir-99a | AL451064.2  | 0.696089878 mirna_lnc |
| 31738 hsa-mir-99a | AL353726.2  | 0.474989724 mirna_lnc |
| 31739 hsa-mir-99a | AC009148.1  | 0.340227365 mirna_lnc |
| 31740 hsa-mir-99a | SPACA6P-AS  | 0.579156466 mirna_lnc |
| 31741 hsa-mir-99a | AC090061.1  | 0.523777981 mirna_lnc |
| 31742 hsa-mir-99a | AC055855.2  | 0.31499441 mirna_lnc  |
| 31743 hsa-mir-99a | AC104109.2  | 0.396388431 mirna_lnc |
| 31744 hsa-mir-99a | LINC02652   | 0.353943612 mirna_lnc |
| 31745 hsa-mir-99a | AC007497.1  | 0.383461963 mirna_lnc |
| 31746 hsa-mir-99a | AL137003.2  | 0.421734158 mirna_lnc |
| 31747 hsa-mir-99a | L29074.1    | 0.552815307 mirna_lnc |
| 31748 hsa-mir-99a | FAM160A1-DT | 0.345620998 mirna_lnc |
| 31749 hsa-mir-99a | AC107464.1  | 0.334862688 mirna_lnc |
| 31750 hsa-mir-99a | AC140125.2  | 0.325061965 mirna_lnc |
| 31751 hsa-mir-99a | AL359541.1  | 0.519690774 mirna_lnc |



|                    |            |                       |
|--------------------|------------|-----------------------|
| 31752 hsa-mir-99a  | RN7SL832P  | 0.330573184 mirna_lnc |
| 31753 hsa-mir-99a  | AL354811.1 | 0.305501838 mirna_lnc |
| 31754 hsa-mir-99a  | AL157931.1 | 0.723076761 mirna_lnc |
| 31755 hsa-mir-99a  | AL133255.1 | 0.39069519 mirna_lnc  |
| 31756 hsa-mir-99a  | AL354919.1 | 0.724407797 mirna_lnc |
| 31757 hsa-mir-99a  | AC116348.2 | 0.32846176 mirna_lnc  |
| 31758 hsa-mir-99a  | AL662791.1 | 0.427025766 mirna_lnc |
| 31759 hsa-mir-99a  | AC103996.2 | 0.326787152 mirna_lnc |
| 31760 hsa-mir-99a  | AC093510.2 | 0.325994064 mirna_lnc |
| 31761 hsa-mir-99a  | AP000662.1 | 0.341098935 mirna_lnc |
| 31762 hsa-mir-99a  | AC008555.1 | 0.376902238 mirna_lnc |
| 31763 hsa-mir-99a  | AL158211.1 | 0.363383403 mirna_lnc |
| 31764 hsa-mir-99a  | AC009084.2 | 0.329755004 mirna_lnc |
| 31765 hsa-mir-99a  | AL135791.1 | 0.520219432 mirna_lnc |
| 31766 hsa-mir-99a  | AL161729.4 | 0.365922864 mirna_lnc |
| 31767 hsa-mir-99a  | AL022341.2 | 0.399855355 mirna_lnc |
| 31768 hsa-mir-99a  | AC009113.1 | 0.381135627 mirna_lnc |
| 31769 hsa-mir-99a  | AC083843.2 | 0.378782135 mirna_lnc |
| 31770 hsa-mir-99a  | AC026471.4 | 0.333114584 mirna_lnc |
| 31771 hsa-mir-99a  | AL645608.2 | 0.614905274 mirna_lnc |
| 31772 hsa-mir-99a  | AC010735.2 | 0.463471268 mirna_lnc |
| 31773 hsa-mir-99a  | AC079610.2 | 0.415823487 mirna_lnc |
| 31774 hsa-mir-99a  | AP001412.1 | 0.354133183 mirna_lnc |
| 31775 hsa-mir-99a  | AL024498.1 | 0.552149913 mirna_lnc |
| 31776 hsa-mir-99a  | AC100793.3 | 0.353695978 mirna_lnc |
| 31777 hsa-mir-99a  | AC012456.2 | 0.350429675 mirna_lnc |
| 31778 hsa-mir-99a  | AC100793.2 | 0.33718448 mirna_lnc  |
| 31779 hsa-mir-99a  | AC007663.4 | 0.495810395 mirna_lnc |
| 31780 hsa-mir-99a  | AC087683.2 | 0.307797128 mirna_lnc |
| 31781 hsa-mir-99a  | AL138921.1 | 0.326456332 mirna_lnc |
| 31782 hsa-mir-99a  | C9orf139   | 0.305574346 mirna_lnc |
| 31783 hsa-mir-99a  | AC079630.1 | 0.35024052 mirna_lnc  |
| 31784 hsa-mir-99a  | AP000845.1 | 0.314521062 mirna_lnc |
| 31785 hsa-mir-99a  | AC137767.1 | 0.43134222 mirna_lnc  |
| 31786 hsa-mir-1269 | AC092667.1 | 0.567462701 mirna_lnc |
| 31787 hsa-mir-1269 | AC025470.2 | 0.722885027 mirna_lnc |
| 31788 hsa-mir-1269 | UGDH-AS1   | 0.301473588 mirna_lnc |
| 31789 hsa-mir-1269 | AC009974.1 | 0.30976676 mirna_lnc  |
| 31790 hsa-mir-1269 | PACRG-AS1  | 0.342859589 mirna_lnc |
| 31791 hsa-mir-1269 | AC100823.1 | 0.396776271 mirna_lnc |
| 31792 hsa-mir-1269 | AP000808.1 | 0.459818998 mirna_lnc |
| 31793 hsa-mir-1269 | LOH12CR2   | 0.366599687 mirna_lnc |
| 31794 hsa-mir-1269 | DDX11-AS1  | 0.366507441 mirna_lnc |
| 31795 hsa-mir-1269 | AC095057.3 | 0.369937092 mirna_lnc |
| 31796 hsa-mir-1269 | AC092614.1 | 0.331013588 mirna_lnc |
| 31797 hsa-mir-1269 | AC106795.3 | 0.32377137 mirna_lnc  |
| 31798 hsa-mir-1269 | AC019069.1 | 0.320437908 mirna_lnc |
| 31799 hsa-mir-1269 | SSBP3-AS1  | 0.306820666 mirna_lnc |
| 31800 hsa-mir-1269 | Z97989.1   | 0.485476395 mirna_lnc |
| 31801 hsa-mir-1269 | AC096637.2 | 0.355947966 mirna_lnc |
| 31802 hsa-mir-1269 | AL356740.1 | 0.332317116 mirna_lnc |
| 31803 hsa-mir-1269 | AP003071.2 | 0.44558517 mirna_lnc  |
| 31804 hsa-mir-1269 | AC025176.1 | 0.377829818 mirna_lnc |
| 31805 hsa-mir-1269 | LINC01494  | 0.633736855 mirna_lnc |

|                    |             |                        |
|--------------------|-------------|------------------------|
| 31806 hsa-mir-1269 | AC092803. 2 | 0. 352789859 mirna_lnc |
| 31807 hsa-mir-1269 | AC147651. 4 | 0. 420207152 mirna_lnc |
| 31808 hsa-mir-1269 | OCIAD1-AS1  | 0. 39717818 mirna_lnc  |
| 31809 hsa-mir-1269 | LINC02367   | 0. 356049181 mirna_lnc |
| 31810 hsa-mir-1269 | AC020763. 4 | 0. 402404682 mirna_lnc |
| 31811 hsa-mir-1269 | LINC01096   | 0. 80792814 mirna_lnc  |
| 31812 hsa-mir-1269 | AC012360. 3 | 0. 371589118 mirna_lnc |
| 31813 hsa-mir-1269 | AC125494. 2 | 0. 338727589 mirna_lnc |
| 31814 hsa-mir-1269 | AC016705. 2 | 0. 507360338 mirna_lnc |
| 31815 hsa-mir-1269 | HOXA10-AS   | 0. 424105971 mirna_lnc |
| 31816 hsa-mir-1269 | AL391069. 2 | 0. 41646817 mirna_lnc  |
| 31817 hsa-mir-1269 | AC116049. 2 | 0. 761652502 mirna_lnc |
| 31818 hsa-mir-1269 | AC139887. 1 | 0. 3101481 mirna_lnc   |
| 31819 hsa-mir-1269 | AC079779. 2 | 0. 337331395 mirna_lnc |
| 31820 hsa-mir-1269 | AC024267. 6 | 0. 33058937 mirna_lnc  |
| 31821 hsa-mir-1269 | LINC01126   | 0. 31833278 mirna_lnc  |
| 31822 hsa-mir-1269 | AL353746. 1 | 0. 46186294 mirna_lnc  |
| 31823 hsa-mir-1269 | AF287957. 1 | 0. 49213017 mirna_lnc  |
| 31824 hsa-mir-1269 | AC022929. 2 | 0. 318966244 mirna_lnc |
| 31825 hsa-mir-1269 | AC109347. 2 | 0. 404404991 mirna_lnc |
| 31826 hsa-mir-1269 | LINC02438   | 0. 421847759 mirna_lnc |
| 31827 hsa-mir-1269 | AC024230. 1 | 0. 664774584 mirna_lnc |
| 31828 hsa-mir-1269 | LINC01397   | 0. 409371468 mirna_lnc |
| 31829 hsa-mir-1269 | AC138904. 1 | 0. 425784873 mirna_lnc |
| 31830 hsa-mir-1269 | AL355304. 1 | 0. 384444037 mirna_lnc |
| 31831 hsa-mir-1269 | AC040160. 1 | 0. 405499772 mirna_lnc |
| 31832 hsa-mir-1269 | AL355596. 1 | 0. 34277605 mirna_lnc  |
| 31833 hsa-mir-1269 | AC012074. 1 | 0. 558636563 mirna_lnc |
| 31834 hsa-mir-1269 | AP000487. 1 | 0. 522213172 mirna_lnc |
| 31835 hsa-mir-1269 | AC004943. 1 | 0. 33213207 mirna_lnc  |
| 31836 hsa-mir-1269 | AC091931. 1 | 0. 344455033 mirna_lnc |
| 31837 hsa-mir-1269 | AP005432. 2 | 0. 683355335 mirna_lnc |
| 31838 hsa-mir-1269 | AC011997. 1 | 0. 319268032 mirna_lnc |
| 31839 hsa-mir-1269 | AC010186. 3 | 0. 464553512 mirna_lnc |
| 31840 hsa-mir-1269 | AC124016. 1 | 0. 320012119 mirna_lnc |
| 31841 hsa-mir-1269 | AC002076. 1 | 0. 416879246 mirna_lnc |
| 31842 hsa-mir-1269 | AC097634. 1 | 0. 328699527 mirna_lnc |
| 31843 hsa-mir-1269 | AL109976. 1 | 0. 313368638 mirna_lnc |
| 31844 hsa-mir-1269 | LINC01686   | 0. 352079952 mirna_lnc |
| 31845 hsa-mir-1269 | LINC01143   | 0. 374295972 mirna_lnc |
| 31846 hsa-mir-1269 | AC125618. 1 | 0. 317068675 mirna_lnc |
| 31847 hsa-mir-1269 | AC120114. 1 | 0. 393709824 mirna_lnc |
| 31848 hsa-mir-1269 | AC100782. 1 | 0. 504889911 mirna_lnc |
| 31849 hsa-mir-1269 | AC079145. 1 | 0. 367798905 mirna_lnc |
| 31850 hsa-mir-1269 | EMC1-AS1    | 0. 361520857 mirna_lnc |
| 31851 hsa-mir-1269 | AC104823. 1 | 0. 324017773 mirna_lnc |
| 31852 hsa-mir-1269 | AL031705. 1 | 0. 303464981 mirna_lnc |
| 31853 hsa-mir-1269 | AC078864. 1 | 0. 378616309 mirna_lnc |
| 31854 hsa-mir-1269 | AC044781. 1 | 0. 394375371 mirna_lnc |
| 31855 hsa-mir-1269 | AC011297. 1 | 0. 50665206 mirna_lnc  |
| 31856 hsa-mir-1269 | AC092535. 1 | 0. 405159588 mirna_lnc |
| 31857 hsa-mir-1269 | AC003986. 2 | 0. 456348768 mirna_lnc |
| 31858 hsa-mir-1269 | BMP7-AS1    | 0. 334750393 mirna_lnc |
| 31859 hsa-mir-1269 | AL354892. 2 | 0. 314661454 mirna_lnc |

|                    |            |                       |
|--------------------|------------|-----------------------|
| 31860 hsa-mir-1269 | AC009088.2 | 0.325993253 mirna_lnc |
| 31861 hsa-mir-1269 | AC106820.2 | 0.348863584 mirna_lnc |
| 31862 hsa-mir-1269 | AC026271.3 | 0.452631594 mirna_lnc |
| 31863 hsa-mir-1269 | AC105046.1 | 0.333899535 mirna_lnc |
| 31864 hsa-mir-1269 | AC016205.1 | 0.487544909 mirna_lnc |
| 31865 hsa-mir-1269 | DPH6-DT    | 0.304554611 mirna_lnc |
| 31866 hsa-mir-1269 | AC092535.3 | 0.398793839 mirna_lnc |
| 31867 hsa-mir-1269 | LINC00653  | 0.308453008 mirna_lnc |
| 31868 hsa-mir-1269 | MYB-AS1    | 0.360586748 mirna_lnc |
| 31869 hsa-mir-1269 | AC092669.1 | 0.450748766 mirna_lnc |
| 31870 hsa-mir-1269 | AC110491.1 | 0.435214877 mirna_lnc |
| 31871 hsa-mir-1269 | HGC6.3     | 0.814427523 mirna_lnc |
| 31872 hsa-mir-1269 | AP002336.2 | 0.514687102 mirna_lnc |
| 31873 hsa-mir-1269 | AC099568.2 | 0.303985954 mirna_lnc |
| 31874 hsa-mir-1269 | FAM66B     | 0.355726099 mirna_lnc |
| 31875 hsa-mir-1269 | AC011773.1 | 0.341632517 mirna_lnc |
| 31876 hsa-mir-1269 | LINC02037  | 0.357293793 mirna_lnc |
| 31877 hsa-mir-1269 | AC087623.3 | 0.381346597 mirna_lnc |
| 31878 hsa-mir-1269 | AL136366.1 | 0.395365871 mirna_lnc |
| 31879 hsa-mir-1269 | AL442128.2 | 0.310690391 mirna_lnc |
| 31880 hsa-mir-1269 | HOXC13-AS  | 0.338274829 mirna_lnc |
| 31881 hsa-mir-1269 | LINC02562  | 0.518058063 mirna_lnc |
| 31882 hsa-mir-1269 | AC011389.3 | 0.465929881 mirna_lnc |
| 31883 hsa-mir-1269 | LINC01891  | 0.493713324 mirna_lnc |
| 31884 hsa-mir-1269 | NLGN4Y-AS1 | 0.372932605 mirna_lnc |
| 31885 hsa-mir-1269 | AC098818.2 | 0.325042895 mirna_lnc |
| 31886 hsa-mir-1269 | AC068473.3 | 0.426611844 mirna_lnc |
| 31887 hsa-mir-1269 | AC104596.1 | 0.491018195 mirna_lnc |
| 31888 hsa-mir-1269 | TCF7L1-IT1 | 0.573212945 mirna_lnc |
| 31889 hsa-mir-1269 | AC007687.1 | 0.40891817 mirna_lnc  |
| 31890 hsa-mir-1269 | AC060766.7 | 0.314263136 mirna_lnc |
| 31891 hsa-mir-1269 | SH3RF3-AS1 | 0.561215712 mirna_lnc |
| 31892 hsa-mir-1269 | AC105114.1 | 0.357417387 mirna_lnc |
| 31893 hsa-mir-1269 | AC107214.1 | 0.394757462 mirna_lnc |
| 31894 hsa-mir-1269 | LINC00885  | 0.36369643 mirna_lnc  |
| 31895 hsa-mir-1269 | AL157832.2 | 0.470616216 mirna_lnc |
| 31896 hsa-mir-1269 | AL591368.1 | 0.513082838 mirna_lnc |
| 31897 hsa-mir-1269 | AC053527.1 | 0.449746004 mirna_lnc |
| 31898 hsa-mir-1269 | AC087623.1 | 0.451086988 mirna_lnc |
| 31899 hsa-mir-1269 | AC025183.2 | 0.387220885 mirna_lnc |
| 31900 hsa-mir-1269 | AC006206.2 | 0.37038386 mirna_lnc  |
| 31901 hsa-mir-1269 | AC093915.1 | 0.332475996 mirna_lnc |
| 31902 hsa-mir-1269 | AC009227.1 | 0.388530597 mirna_lnc |
| 31903 hsa-mir-1269 | AL121760.1 | 0.308462069 mirna_lnc |
| 31904 hsa-mir-1269 | AC007848.2 | 0.312769893 mirna_lnc |
| 31905 hsa-mir-1269 | AC015795.1 | 0.314382843 mirna_lnc |
| 31906 hsa-mir-1269 | AC068700.1 | 0.413555051 mirna_lnc |
| 31907 hsa-mir-1269 | AC073389.2 | 0.411801138 mirna_lnc |
| 31908 hsa-mir-1269 | AL591167.1 | 0.335510711 mirna_lnc |
| 31909 hsa-mir-1269 | AL445471.1 | 0.351887349 mirna_lnc |
| 31910 hsa-mir-1269 | AC083805.3 | 0.346905161 mirna_lnc |
| 31911 hsa-mir-1269 | AC055854.1 | 0.395297351 mirna_lnc |
| 31912 hsa-mir-1269 | AL031432.3 | 0.330998742 mirna_lnc |
| 31913 hsa-mir-1269 | AL031186.1 | 0.60091511 mirna_lnc  |

|                    |            |                       |
|--------------------|------------|-----------------------|
| 31914 hsa-mir-1269 | AC112176.1 | 0.412480819 mirna_lnc |
| 31915 hsa-mir-1269 | AC010198.1 | 0.322804973 mirna_lnc |
| 31916 hsa-mir-1269 | LINC01258  | 0.641943873 mirna_lnc |
| 31917 hsa-mir-1269 | AC007541.1 | 0.374129339 mirna_lnc |
| 31918 hsa-mir-1269 | AC139795.3 | 0.304160065 mirna_lnc |
| 31919 hsa-mir-1269 | AC092111.2 | 0.416791975 mirna_lnc |
| 31920 hsa-mir-1269 | AC006946.2 | 0.429874121 mirna_lnc |
| 31921 hsa-mir-1269 | AC022509.2 | 0.528755679 mirna_lnc |
| 31922 hsa-mir-1269 | AC005865.1 | 0.55942483 mirna_lnc  |
| 31923 hsa-mir-1269 | AC011365.2 | 0.355538421 mirna_lnc |
| 31924 hsa-mir-1269 | AC007250.1 | 0.398054304 mirna_lnc |
| 31925 hsa-mir-1269 | AC034236.3 | 0.355199777 mirna_lnc |
| 31926 hsa-mir-1269 | AC090197.1 | 0.409290053 mirna_lnc |
| 31927 hsa-mir-1269 | AP000317.1 | 0.306827297 mirna_lnc |
| 31928 hsa-mir-1269 | U47924.2   | 0.313905574 mirna_lnc |
| 31929 hsa-mir-1269 | INKA2-AS1  | 0.300729824 mirna_lnc |
| 31930 hsa-mir-1269 | AL139339.2 | 0.480217575 mirna_lnc |
| 31931 hsa-mir-1269 | AC098936.1 | 0.479442909 mirna_lnc |
| 31932 hsa-mir-1269 | IRAIN      | 0.329415891 mirna_lnc |
| 31933 hsa-mir-1269 | AC138207.2 | 0.321696186 mirna_lnc |
| 31934 hsa-mir-1269 | AC079316.2 | 0.445543885 mirna_lnc |
| 31935 hsa-mir-1269 | AL807752.4 | 0.379232676 mirna_lnc |
| 31936 hsa-mir-1269 | AC073869.3 | 0.395694795 mirna_lnc |
| 31937 hsa-mir-1269 | ETV5-AS1   | 0.631682484 mirna_lnc |
| 31938 hsa-mir-1269 | AC079610.1 | 0.314735496 mirna_lnc |
| 31939 hsa-mir-1269 | AC109449.1 | 0.37643069 mirna_lnc  |
| 31940 hsa-mir-1269 | AL162231.4 | 0.375380486 mirna_lnc |
| 31941 hsa-mir-1269 | ZNF649-AS1 | 0.339470601 mirna_lnc |
| 31942 hsa-mir-1269 | AC107068.1 | 0.309013905 mirna_lnc |
| 31943 hsa-mir-1269 | SEMA6A-AS2 | 0.37034422 mirna_lnc  |
| 31944 hsa-mir-1269 | AC004969.1 | 0.421426308 mirna_lnc |
| 31945 hsa-mir-1269 | AP001783.1 | 0.430403628 mirna_lnc |
| 31946 hsa-mir-1269 | LINC02457  | 0.429661049 mirna_lnc |
| 31947 hsa-mir-1269 | AL354993.1 | 0.372132348 mirna_lnc |
| 31948 hsa-mir-1269 | AL031651.2 | 0.543827385 mirna_lnc |
| 31949 hsa-mir-1269 | AL118511.1 | 0.42944598 mirna_lnc  |
| 31950 hsa-mir-1269 | AC027348.1 | 0.571295745 mirna_lnc |
| 31951 hsa-mir-1269 | AC046130.2 | 0.562512563 mirna_lnc |
| 31952 hsa-mir-1269 | AL354950.1 | 0.398566517 mirna_lnc |
| 31953 hsa-mir-1269 | BNC2-AS1   | 0.448193011 mirna_lnc |
| 31954 hsa-mir-1269 | AC068620.2 | 0.351775215 mirna_lnc |
| 31955 hsa-mir-1269 | AC005034.4 | 0.463886791 mirna_lnc |
| 31956 hsa-mir-1269 | GIHCG      | 0.419764943 mirna_lnc |
| 31957 hsa-mir-1269 | AL390760.1 | 0.370403753 mirna_lnc |
| 31958 hsa-mir-1269 | AC007370.1 | 0.31275525 mirna_lnc  |
| 31959 hsa-mir-1269 | AL359881.3 | 0.327816388 mirna_lnc |
| 31960 hsa-mir-1269 | AP000808.2 | 0.500683324 mirna_lnc |
| 31961 hsa-mir-1269 | LINC00028  | 0.486092101 mirna_lnc |
| 31962 hsa-mir-1269 | AL359510.2 | 0.437325813 mirna_lnc |
| 31963 hsa-mir-1269 | LINC02470  | 0.461116869 mirna_lnc |
| 31964 hsa-mir-1269 | AC020928.3 | 0.35859479 mirna_lnc  |
| 31965 hsa-mir-1269 | AC022107.1 | 0.408206492 mirna_lnc |
| 31966 hsa-mir-1269 | AL031587.1 | 0.570456088 mirna_lnc |
| 31967 hsa-mir-1269 | AC106820.4 | 0.53076812 mirna_lnc  |

|                    |            |                       |
|--------------------|------------|-----------------------|
| 31968 hsa-mir-1269 | AC026801.2 | 0.458724419 mirna_lnc |
| 31969 hsa-mir-1269 | LINC02097  | 0.307310378 mirna_lnc |
| 31970 hsa-mir-1269 | LINC00471  | 0.389520408 mirna_lnc |
| 31971 hsa-mir-1269 | TPRG1-AS1  | 0.319615964 mirna_lnc |
| 31972 hsa-mir-1269 | LINC00173  | 0.395173429 mirna_lnc |
| 31973 hsa-mir-1269 | AL929236.1 | 0.357011026 mirna_lnc |
| 31974 hsa-mir-1269 | LINC00552  | 0.364090892 mirna_lnc |
| 31975 hsa-mir-1269 | AC010980.2 | 0.341570294 mirna_lnc |
| 31976 hsa-mir-1269 | AC018892.3 | 0.313209697 mirna_lnc |
| 31977 hsa-mir-1269 | LINC01918  | 0.442332986 mirna_lnc |
| 31978 hsa-mir-1269 | AC104581.4 | 0.307364886 mirna_lnc |
| 31979 hsa-mir-1269 | AL139339.1 | 0.554595416 mirna_lnc |
| 31980 hsa-mir-1269 | AL121917.2 | 0.448305261 mirna_lnc |
| 31981 hsa-mir-1269 | CD81-AS1   | 0.340012331 mirna_lnc |
| 31982 hsa-mir-1269 | AC108451.1 | 0.38371676 mirna_lnc  |
| 31983 hsa-mir-1269 | AC015983.2 | 0.398741796 mirna_lnc |
| 31984 hsa-mir-1269 | AC032011.1 | 0.419846734 mirna_lnc |
| 31985 hsa-mir-1269 | AC125603.4 | 0.349964551 mirna_lnc |
| 31986 hsa-mir-1269 | AC107464.1 | 0.306048732 mirna_lnc |
| 31987 hsa-mir-1269 | AP002360.2 | 0.302211269 mirna_lnc |
| 31988 hsa-mir-1269 | LINC01936  | 0.360300259 mirna_lnc |
| 31989 hsa-mir-1269 | AC097468.2 | 0.359536226 mirna_lnc |
| 31990 hsa-mir-1269 | AL358115.1 | 0.330241448 mirna_lnc |
| 31991 hsa-mir-1269 | AL049712.1 | 0.381627419 mirna_lnc |
| 31992 hsa-mir-1269 | AC060766.6 | 0.426446956 mirna_lnc |
| 31993 hsa-mir-1269 | AC092718.5 | 0.415574404 mirna_lnc |
| 31994 hsa-mir-1269 | AC146944.4 | 0.30644829 mirna_lnc  |
| 31995 hsa-mir-1269 | AC010680.2 | 0.334576843 mirna_lnc |
| 31996 hsa-mir-1269 | AC126768.1 | 0.330448208 mirna_lnc |
| 31997 hsa-mir-1269 | AC008537.2 | 0.336309162 mirna_lnc |
| 31998 hsa-mir-1269 | AL807761.4 | 0.301859565 mirna_lnc |
| 31999 hsa-mir-1269 | LINC00900  | 0.361736184 mirna_lnc |
| 32000 hsa-mir-1269 | LZTS1-AS1  | 0.409035558 mirna_lnc |
| 32001 hsa-mir-1269 | LAMC1-AS1  | 0.347040844 mirna_lnc |
| 32002 hsa-mir-1269 | AC011239.1 | 0.671406639 mirna_lnc |
| 32003 hsa-mir-1269 | AC006487.1 | 0.570973955 mirna_lnc |
| 32004 hsa-mir-1269 | AF213884.3 | 0.396524088 mirna_lnc |
| 32005 hsa-mir-1269 | AC008033.3 | 0.383073923 mirna_lnc |
| 32006 hsa-mir-1269 | AC097505.1 | 0.339295814 mirna_lnc |
| 32007 hsa-mir-1269 | NAV2-AS2   | 0.469275858 mirna_lnc |
| 32008 hsa-mir-1269 | CAMTA1-IT1 | 0.331070595 mirna_lnc |
| 32009 hsa-mir-1269 | AC010680.3 | 0.436643172 mirna_lnc |
| 32010 hsa-mir-1269 | AC022001.3 | 0.407671966 mirna_lnc |
| 32011 hsa-mir-1269 | AP002490.1 | 0.356198344 mirna_lnc |
| 32012 hsa-mir-19a  | AC012073.1 | 0.330077097 mirna_lnc |
| 32013 hsa-mir-19a  | AL161891.1 | 0.385458371 mirna_lnc |
| 32014 hsa-mir-19a  | AC124303.1 | 0.309635209 mirna_lnc |
| 32015 hsa-mir-19a  | AC021945.1 | 0.321525139 mirna_lnc |
| 32016 hsa-mir-19a  | AC090844.3 | 0.31129821 mirna_lnc  |
| 32017 hsa-mir-19a  | AC131009.3 | 0.374449842 mirna_lnc |
| 32018 hsa-mir-19a  | AC024940.6 | 0.349728892 mirna_lnc |
| 32019 hsa-mir-19a  | LINC02003  | 0.341210359 mirna_lnc |
| 32020 hsa-mir-19a  | AC125257.1 | 0.37053495 mirna_lnc  |
| 32021 hsa-mir-19a  | AC004835.1 | 0.322145961 mirna_lnc |

|       |             |             |             |           |
|-------|-------------|-------------|-------------|-----------|
| 32022 | hsa-mir-19a | AC005831.1  | 0.337334945 | mirna_lnc |
| 32023 | hsa-mir-19a | AL358473.1  | 0.323190213 | mirna_lnc |
| 32024 | hsa-mir-19a | AC004943.1  | 0.303147982 | mirna_lnc |
| 32025 | hsa-mir-19a | LINC01357   | 0.300243944 | mirna_lnc |
| 32026 | hsa-mir-19a | AC099518.2  | 0.38350147  | mirna_lnc |
| 32027 | hsa-mir-19a | AL390728.6  | 0.347264494 | mirna_lnc |
| 32028 | hsa-mir-19a | UBR5-AS1    | 0.323404531 | mirna_lnc |
| 32029 | hsa-mir-19a | SREBF2-AS1  | 0.312792013 | mirna_lnc |
| 32030 | hsa-mir-19a | AC004943.3  | 0.314875492 | mirna_lnc |
| 32031 | hsa-mir-19a | RNASEH1-AS1 | 0.326942016 | mirna_lnc |
| 32032 | hsa-mir-19a | AC005379.1  | 0.315804911 | mirna_lnc |
| 32033 | hsa-mir-19a | AC011773.1  | 0.323107564 | mirna_lnc |
| 32034 | hsa-mir-19a | AC107909.1  | 0.318660748 | mirna_lnc |
| 32035 | hsa-mir-19a | AC132192.1  | 0.332056484 | mirna_lnc |
| 32036 | hsa-mir-19a | AL022324.3  | 0.358014139 | mirna_lnc |
| 32037 | hsa-mir-19a | AL603832.1  | 0.373790226 | mirna_lnc |
| 32038 | hsa-mir-19a | AP006621.5  | 0.320333669 | mirna_lnc |
| 32039 | hsa-mir-19a | AP003086.2  | 0.327433893 | mirna_lnc |
| 32040 | hsa-mir-19a | AC090907.2  | 0.325674977 | mirna_lnc |
| 32041 | hsa-mir-19a | LINC00482   | 0.313902768 | mirna_lnc |
| 32042 | hsa-mir-19a | AC112255.1  | 0.318924245 | mirna_lnc |
| 32043 | hsa-mir-19a | LINC01433   | 0.335448113 | mirna_lnc |
| 32044 | hsa-mir-19a | AC116025.2  | 0.303265439 | mirna_lnc |
| 32045 | hsa-mir-19a | AC005089.1  | 0.304793929 | mirna_lnc |
| 32046 | hsa-mir-19a | MCF2L-AS1   | 0.312143926 | mirna_lnc |
| 32047 | hsa-mir-19a | AL138767.3  | 0.326724068 | mirna_lnc |
| 32048 | hsa-mir-19a | AL008721.1  | 0.322174752 | mirna_lnc |
| 32049 | hsa-mir-19a | AL049833.3  | 0.304591577 | mirna_lnc |
| 32050 | hsa-mir-19a | AC005046.1  | 0.373788697 | mirna_lnc |
| 32051 | hsa-mir-19a | LINC02365   | 0.38543452  | mirna_lnc |
| 32052 | hsa-mir-19a | AL118511.1  | 0.347446874 | mirna_lnc |
| 32053 | hsa-mir-19a | AP003392.3  | 0.419854628 | mirna_lnc |
| 32054 | hsa-mir-19a | AC133961.1  | 0.359358636 | mirna_lnc |
| 32055 | hsa-mir-19a | AC005391.1  | 0.306343048 | mirna_lnc |
| 32056 | hsa-mir-19a | AC004593.1  | 0.300995067 | mirna_lnc |
| 32057 | hsa-mir-19a | AC007038.2  | 0.30964826  | mirna_lnc |
| 32058 | hsa-mir-19a | LINC00456   | 0.345335196 | mirna_lnc |
| 32059 | hsa-mir-19a | AL049646.1  | 0.335656659 | mirna_lnc |
| 32060 | hsa-mir-19a | PSPC1-AS2   | 0.301015358 | mirna_lnc |
| 32061 | hsa-mir-19a | AC114488.1  | 0.317619867 | mirna_lnc |
| 32062 | hsa-mir-19a | AL356740.2  | 0.310927386 | mirna_lnc |
| 32063 | hsa-mir-590 | AC019294.2  | 0.347500739 | mirna_lnc |
| 32064 | hsa-mir-590 | SNHG3       | 0.314058392 | mirna_lnc |
| 32065 | hsa-mir-590 | AC069544.1  | 0.335225872 | mirna_lnc |
| 32066 | hsa-mir-590 | TMPO-AS1    | 0.328918371 | mirna_lnc |
| 32067 | hsa-mir-590 | AL121832.2  | 0.357470299 | mirna_lnc |
| 32068 | hsa-mir-590 | AC020658.4  | 0.376427548 | mirna_lnc |
| 32069 | hsa-mir-590 | AL035461.2  | 0.314248525 | mirna_lnc |
| 32070 | hsa-mir-590 | AC048344.4  | 0.324699322 | mirna_lnc |
| 32071 | hsa-mir-590 | SCAT2       | 0.341417972 | mirna_lnc |
| 32072 | hsa-mir-590 | CEP83-DT    | 0.337806577 | mirna_lnc |
| 32073 | hsa-mir-590 | AL049539.1  | 0.319134121 | mirna_lnc |
| 32074 | hsa-mir-590 | AL590326.1  | 0.347411295 | mirna_lnc |
| 32075 | hsa-mir-590 | LINC01311   | 0.413954109 | mirna_lnc |

|                   |            |                       |
|-------------------|------------|-----------------------|
| 32076 hsa-mir-590 | AC074117.1 | 0.400737573 mirna_lnc |
| 32077 hsa-mir-590 | AP001469.3 | 0.301087273 mirna_lnc |
| 32078 hsa-mir-590 | TFAP2A-AS1 | 0.357587336 mirna_lnc |
| 32079 hsa-mir-590 | AC022387.1 | 0.384365171 mirna_lnc |
| 32080 hsa-mir-590 | AC027243.2 | 0.304010722 mirna_lnc |
| 32081 hsa-mir-590 | AL023803.3 | 0.306567352 mirna_lnc |
| 32082 hsa-mir-590 | AC131009.3 | 0.454530842 mirna_lnc |
| 32083 hsa-mir-590 | AC024940.6 | 0.328953821 mirna_lnc |
| 32084 hsa-mir-590 | AC109322.1 | 0.31781986 mirna_lnc  |
| 32085 hsa-mir-590 | AC098828.2 | 0.342382728 mirna_lnc |
| 32086 hsa-mir-590 | AC012377.1 | 0.342775959 mirna_lnc |
| 32087 hsa-mir-590 | AC079907.1 | 0.340908492 mirna_lnc |
| 32088 hsa-mir-590 | AL137802.2 | 0.344982209 mirna_lnc |
| 32089 hsa-mir-590 | LINC02367  | 0.313705012 mirna_lnc |
| 32090 hsa-mir-590 | AC073195.1 | 0.382977491 mirna_lnc |
| 32091 hsa-mir-590 | AP000553.2 | 0.304094009 mirna_lnc |
| 32092 hsa-mir-590 | AC016394.2 | 0.323382362 mirna_lnc |
| 32093 hsa-mir-590 | AL031985.3 | 0.355218683 mirna_lnc |
| 32094 hsa-mir-590 | LINC01424  | 0.348459841 mirna_lnc |
| 32095 hsa-mir-590 | AL163051.1 | 0.326990513 mirna_lnc |
| 32096 hsa-mir-590 | AC090578.2 | 0.313032987 mirna_lnc |
| 32097 hsa-mir-590 | AC090517.2 | 0.316727148 mirna_lnc |
| 32098 hsa-mir-590 | Z95115.1   | 0.347740866 mirna_lnc |
| 32099 hsa-mir-590 | LINC01143  | 0.339263468 mirna_lnc |
| 32100 hsa-mir-590 | AC004884.2 | 0.338116555 mirna_lnc |
| 32101 hsa-mir-590 | AP001025.1 | 0.345657553 mirna_lnc |
| 32102 hsa-mir-590 | AL121658.1 | 0.302955226 mirna_lnc |
| 32103 hsa-mir-590 | AC091153.3 | 0.321577176 mirna_lnc |
| 32104 hsa-mir-590 | AC063948.1 | 0.358994712 mirna_lnc |
| 32105 hsa-mir-590 | AL354892.2 | 0.36845054 mirna_lnc  |
| 32106 hsa-mir-590 | AC090527.3 | 0.399560158 mirna_lnc |
| 32107 hsa-mir-590 | AC005379.1 | 0.305803978 mirna_lnc |
| 32108 hsa-mir-590 | AC131212.4 | 0.334527668 mirna_lnc |
| 32109 hsa-mir-590 | Z93930.3   | 0.301335333 mirna_lnc |
| 32110 hsa-mir-590 | AC011773.1 | 0.329083709 mirna_lnc |
| 32111 hsa-mir-590 | AL645608.4 | 0.33472733 mirna_lnc  |
| 32112 hsa-mir-590 | AC008115.1 | 0.352398681 mirna_lnc |
| 32113 hsa-mir-590 | AC007663.3 | 0.330619115 mirna_lnc |
| 32114 hsa-mir-590 | AC004471.1 | 0.345508149 mirna_lnc |
| 32115 hsa-mir-590 | AC136475.1 | 0.300673692 mirna_lnc |
| 32116 hsa-mir-590 | AC113143.1 | 0.303275591 mirna_lnc |
| 32117 hsa-mir-590 | AC107214.1 | 0.339550326 mirna_lnc |
| 32118 hsa-mir-590 | AL022324.3 | 0.391489988 mirna_lnc |
| 32119 hsa-mir-590 | AC005005.3 | 0.368010622 mirna_lnc |
| 32120 hsa-mir-590 | ATP2B1-AS1 | 0.346109621 mirna_lnc |
| 32121 hsa-mir-590 | AP000255.1 | 0.312653751 mirna_lnc |
| 32122 hsa-mir-590 | AL132765.2 | 0.306439154 mirna_lnc |
| 32123 hsa-mir-590 | AC019129.2 | 0.313428854 mirna_lnc |
| 32124 hsa-mir-590 | AC092756.1 | 0.31110929 mirna_lnc  |
| 32125 hsa-mir-590 | AC090907.2 | 0.305130592 mirna_lnc |
| 32126 hsa-mir-590 | AC092447.5 | 0.342911029 mirna_lnc |
| 32127 hsa-mir-590 | LINC01901  | 0.345240345 mirna_lnc |
| 32128 hsa-mir-590 | AL008721.1 | 0.305008746 mirna_lnc |
| 32129 hsa-mir-590 | AL121989.1 | 0.335366917 mirna_lnc |

|                   |             |                        |
|-------------------|-------------|------------------------|
| 32130 hsa-mir-590 | AC090970. 1 | 0. 313903343 mirna_lnc |
| 32131 hsa-mir-590 | AC004925. 1 | 0. 358686081 mirna_lnc |
| 32132 hsa-mir-590 | AP000350. 5 | 0. 303918704 mirna_lnc |
| 32133 hsa-mir-590 | AC073389. 3 | 0. 323944466 mirna_lnc |
| 32134 hsa-mir-590 | AP003392. 3 | 0. 369979911 mirna_lnc |
| 32135 hsa-mir-590 | DLGAP1-AS3  | 0. 30507128 mirna_lnc  |
| 32136 hsa-mir-590 | MAPT-IT1    | 0. 331004172 mirna_lnc |
| 32137 hsa-mir-590 | AC005006. 1 | 0. 348592824 mirna_lnc |
| 32138 hsa-mir-590 | AL353726. 2 | 0. 340824853 mirna_lnc |
| 32139 hsa-mir-590 | AC007497. 1 | 0. 349377087 mirna_lnc |
| 32140 hsa-mir-590 | AC145423. 2 | 0. 457237476 mirna_lnc |
| 32141 hsa-mir-590 | RN7SL832P   | 0. 307440948 mirna_lnc |
| 32142 hsa-mir-590 | AL157931. 1 | 0. 317405851 mirna_lnc |
| 32143 hsa-mir-590 | AL354919. 1 | 0. 327924024 mirna_lnc |
| 32144 hsa-mir-590 | AP001972. 4 | 0. 302295391 mirna_lnc |
| 32145 hsa-mir-590 | AC004232. 3 | 0. 307902298 mirna_lnc |
| 32146 hsa-mir-590 | AC137767. 1 | 0. 443163409 mirna_lnc |
| 32147 hsa-mir-671 | AC092718. 4 | 0. 374770098 mirna_lnc |
| 32148 hsa-mir-671 | AC012073. 1 | 0. 347539147 mirna_lnc |
| 32149 hsa-mir-671 | TMPO-AS1    | 0. 38050176 mirna_lnc  |
| 32150 hsa-mir-671 | AC020658. 4 | 0. 345226558 mirna_lnc |
| 32151 hsa-mir-671 | AL117332. 1 | 0. 338174025 mirna_lnc |
| 32152 hsa-mir-671 | AC083799. 1 | 0. 312519073 mirna_lnc |
| 32153 hsa-mir-671 | AC106820. 3 | 0. 318531288 mirna_lnc |
| 32154 hsa-mir-671 | AP001469. 3 | 0. 383811977 mirna_lnc |
| 32155 hsa-mir-671 | AC004943. 2 | 0. 320045681 mirna_lnc |
| 32156 hsa-mir-671 | AC096656. 1 | 0. 309043958 mirna_lnc |
| 32157 hsa-mir-671 | AC005840. 2 | 0. 409121339 mirna_lnc |
| 32158 hsa-mir-671 | AC074351. 1 | 0. 391379821 mirna_lnc |
| 32159 hsa-mir-671 | AC073857. 1 | 0. 331800655 mirna_lnc |
| 32160 hsa-mir-671 | LINC01806   | 0. 358104682 mirna_lnc |
| 32161 hsa-mir-671 | AC007389. 3 | 0. 357864181 mirna_lnc |
| 32162 hsa-mir-671 | LINC02367   | 0. 304465309 mirna_lnc |
| 32163 hsa-mir-671 | AL137804. 1 | 0. 35935523 mirna_lnc  |
| 32164 hsa-mir-671 | AC069281. 1 | 0. 323166685 mirna_lnc |
| 32165 hsa-mir-671 | AC012360. 3 | 0. 307538334 mirna_lnc |
| 32166 hsa-mir-671 | AC027088. 3 | 0. 341367335 mirna_lnc |
| 32167 hsa-mir-671 | GHET1       | 0. 38711014 mirna_lnc  |
| 32168 hsa-mir-671 | AL161772. 1 | 0. 340560121 mirna_lnc |
| 32169 hsa-mir-671 | LINC01850   | 0. 388929966 mirna_lnc |
| 32170 hsa-mir-671 | WWTR1-AS1   | 0. 302931062 mirna_lnc |
| 32171 hsa-mir-671 | LINC01968   | 0. 327184785 mirna_lnc |
| 32172 hsa-mir-671 | AC125618. 1 | 0. 301904122 mirna_lnc |
| 32173 hsa-mir-671 | AC004884. 2 | 0. 316748672 mirna_lnc |
| 32174 hsa-mir-671 | AL391069. 3 | 0. 30243082 mirna_lnc  |
| 32175 hsa-mir-671 | AC012442. 1 | 0. 322574814 mirna_lnc |
| 32176 hsa-mir-671 | SREBF2-AS1  | 0. 316330847 mirna_lnc |
| 32177 hsa-mir-671 | AC110769. 2 | 0. 303745302 mirna_lnc |
| 32178 hsa-mir-671 | AC100812. 1 | 0. 37802084 mirna_lnc  |
| 32179 hsa-mir-671 | AC046143. 2 | 0. 347222957 mirna_lnc |
| 32180 hsa-mir-671 | AC112907. 1 | 0. 30526112 mirna_lnc  |
| 32181 hsa-mir-671 | AC010275. 1 | 0. 329044853 mirna_lnc |
| 32182 hsa-mir-671 | LINC01063   | 0. 321587359 mirna_lnc |
| 32183 hsa-mir-671 | LINC02198   | 0. 30547473 mirna_lnc  |



|                     |             |                       |
|---------------------|-------------|-----------------------|
| 32184 hsa-mir-671   | AC069213.1  | 0.301774017 mirna_lnc |
| 32185 hsa-mir-671   | AC009271.1  | 0.313747039 mirna_lnc |
| 32186 hsa-mir-671   | AC107214.1  | 0.328197311 mirna_lnc |
| 32187 hsa-mir-671   | AC131235.3  | 0.364244228 mirna_lnc |
| 32188 hsa-mir-671   | AP005328.2  | 0.320651936 mirna_lnc |
| 32189 hsa-mir-671   | AL132712.2  | 0.331678836 mirna_lnc |
| 32190 hsa-mir-671   | AC007823.1  | 0.352496785 mirna_lnc |
| 32191 hsa-mir-671   | AC096992.2  | 0.351115571 mirna_lnc |
| 32192 hsa-mir-671   | LPP-AS2     | 0.332093075 mirna_lnc |
| 32193 hsa-mir-671   | AC026803.2  | 0.304717238 mirna_lnc |
| 32194 hsa-mir-671   | ELDR        | 0.339127168 mirna_lnc |
| 32195 hsa-mir-671   | AC026785.3  | 0.310847952 mirna_lnc |
| 32196 hsa-mir-671   | AC019129.2  | 0.334185547 mirna_lnc |
| 32197 hsa-mir-671   | AL132712.1  | 0.311613521 mirna_lnc |
| 32198 hsa-mir-671   | AC008883.2  | 0.311403937 mirna_lnc |
| 32199 hsa-mir-671   | CPNE8-AS1   | 0.333885436 mirna_lnc |
| 32200 hsa-mir-671   | AC036214.1  | 0.381021791 mirna_lnc |
| 32201 hsa-mir-671   | LINC02006   | 0.311658107 mirna_lnc |
| 32202 hsa-mir-671   | AL024497.1  | 0.385167653 mirna_lnc |
| 32203 hsa-mir-671   | AC010501.1  | 0.309494654 mirna_lnc |
| 32204 hsa-mir-671   | AC126768.2  | 0.308924361 mirna_lnc |
| 32205 hsa-mir-19b-1 | AC012073.1  | 0.317605524 mirna_lnc |
| 32206 hsa-mir-19b-1 | AC010761.2  | 0.381994737 mirna_lnc |
| 32207 hsa-mir-19b-1 | AC012531.1  | 0.324698482 mirna_lnc |
| 32208 hsa-mir-19b-1 | AL161891.1  | 0.499081438 mirna_lnc |
| 32209 hsa-mir-19b-1 | AC027228.2  | 0.306356349 mirna_lnc |
| 32210 hsa-mir-19b-1 | AC027627.1  | 0.316072607 mirna_lnc |
| 32211 hsa-mir-19b-1 | AC021945.1  | 0.361619921 mirna_lnc |
| 32212 hsa-mir-19b-1 | AC090844.3  | 0.30407234 mirna_lnc  |
| 32213 hsa-mir-19b-1 | GCC2-AS1    | 0.305305771 mirna_lnc |
| 32214 hsa-mir-19b-1 | AL355388.2  | 0.306758093 mirna_lnc |
| 32215 hsa-mir-19b-1 | AC005831.1  | 0.375263207 mirna_lnc |
| 32216 hsa-mir-19b-1 | LINC01460   | 0.397275832 mirna_lnc |
| 32217 hsa-mir-19b-1 | AC099518.2  | 0.391438603 mirna_lnc |
| 32218 hsa-mir-19b-1 | AC007128.1  | 0.324304611 mirna_lnc |
| 32219 hsa-mir-19b-1 | RNASEH1-AS1 | 0.302104726 mirna_lnc |
| 32220 hsa-mir-19b-1 | AC087491.1  | 0.323701105 mirna_lnc |
| 32221 hsa-mir-19b-1 | AP001065.2  | 0.326983223 mirna_lnc |
| 32222 hsa-mir-19b-1 | AC145207.5  | 0.34530379 mirna_lnc  |
| 32223 hsa-mir-19b-1 | LINC02065   | 0.327225926 mirna_lnc |
| 32224 hsa-mir-19b-1 | AL137244.1  | 0.34309709 mirna_lnc  |
| 32225 hsa-mir-19b-1 | AL391095.3  | 0.356338258 mirna_lnc |
| 32226 hsa-mir-19b-1 | AL512652.2  | 0.301171996 mirna_lnc |
| 32227 hsa-mir-19b-1 | LINC01433   | 0.302403812 mirna_lnc |
| 32228 hsa-mir-19b-1 | LINC00659   | 0.345097381 mirna_lnc |
| 32229 hsa-mir-19b-1 | MCF2L-AS1   | 0.368434161 mirna_lnc |
| 32230 hsa-mir-19b-1 | ZNF649-AS1  | 0.313821362 mirna_lnc |
| 32231 hsa-mir-19b-1 | LINC01555   | 0.321942457 mirna_lnc |
| 32232 hsa-mir-19b-1 | LINC02097   | 0.326784817 mirna_lnc |
| 32233 hsa-mir-19b-1 | AC017104.3  | 0.301034058 mirna_lnc |
| 32234 hsa-mir-19b-1 | AC097478.2  | 0.30461613 mirna_lnc  |
| 32235 hsa-mir-19b-1 | LINC00456   | 0.406473394 mirna_lnc |
| 32236 hsa-mir-19b-1 | AL049646.1  | 0.357766673 mirna_lnc |
| 32237 hsa-mir-19b-1 | SLC04A1-AS1 | 0.351914098 mirna_lnc |

|       |               |              |             |           |
|-------|---------------|--------------|-------------|-----------|
| 32238 | hsa-mir-19b-1 | LINC02547    | 0.307678138 | mirna_lnc |
| 32239 | hsa-mir-19b-1 | AC114488.1   | 0.316277775 | mirna_lnc |
| 32240 | hsa-mir-19b-1 | AL136146.2   | 0.369952107 | mirna_lnc |
| 32241 | hsa-mir-324   | AC012073.1   | 0.303023256 | mirna_lnc |
| 32242 | hsa-mir-324   | LINC01873    | 0.308213651 | mirna_lnc |
| 32243 | hsa-mir-324   | MELTF-AS1    | 0.315124792 | mirna_lnc |
| 32244 | hsa-mir-324   | TMPO-AS1     | 0.467851355 | mirna_lnc |
| 32245 | hsa-mir-324   | AL121832.2   | 0.332247853 | mirna_lnc |
| 32246 | hsa-mir-324   | DDX11-AS1    | 0.320858957 | mirna_lnc |
| 32247 | hsa-mir-324   | AC004241.3   | 0.39798382  | mirna_lnc |
| 32248 | hsa-mir-324   | AL117332.1   | 0.518639196 | mirna_lnc |
| 32249 | hsa-mir-324   | AC022211.2   | 0.3151941   | mirna_lnc |
| 32250 | hsa-mir-324   | CEP83-DT     | 0.323811709 | mirna_lnc |
| 32251 | hsa-mir-324   | HOXC-AS2     | 0.348372674 | mirna_lnc |
| 32252 | hsa-mir-324   | JARID2-AS1   | 0.328666407 | mirna_lnc |
| 32253 | hsa-mir-324   | AC074117.1   | 0.377157307 | mirna_lnc |
| 32254 | hsa-mir-324   | AL031667.3   | 0.378065706 | mirna_lnc |
| 32255 | hsa-mir-324   | TFAP2A-AS1   | 0.396184934 | mirna_lnc |
| 32256 | hsa-mir-324   | AC100791.2   | 0.318098486 | mirna_lnc |
| 32257 | hsa-mir-324   | AC063977.6   | 0.330631454 | mirna_lnc |
| 32258 | hsa-mir-324   | AC092159.2   | 0.30617217  | mirna_lnc |
| 32259 | hsa-mir-324   | AL023803.3   | 0.36843748  | mirna_lnc |
| 32260 | hsa-mir-324   | AC109322.1   | 0.323236643 | mirna_lnc |
| 32261 | hsa-mir-324   | AC074351.1   | 0.424947783 | mirna_lnc |
| 32262 | hsa-mir-324   | AL138724.1   | 0.339744964 | mirna_lnc |
| 32263 | hsa-mir-324   | AL445072.1   | 0.395289024 | mirna_lnc |
| 32264 | hsa-mir-324   | OCIAD1-AS1   | 0.302377181 | mirna_lnc |
| 32265 | hsa-mir-324   | AC016723.1   | 0.403168514 | mirna_lnc |
| 32266 | hsa-mir-324   | AC064807.1   | 0.307988816 | mirna_lnc |
| 32267 | hsa-mir-324   | AL137802.2   | 0.348806043 | mirna_lnc |
| 32268 | hsa-mir-324   | AC091729.3   | 0.324149194 | mirna_lnc |
| 32269 | hsa-mir-324   | AL139424.1   | 0.302716656 | mirna_lnc |
| 32270 | hsa-mir-324   | AL136162.1   | 0.401120665 | mirna_lnc |
| 32271 | hsa-mir-324   | AC007389.3   | 0.36910296  | mirna_lnc |
| 32272 | hsa-mir-324   | LINC02367    | 0.312092676 | mirna_lnc |
| 32273 | hsa-mir-324   | AC073195.1   | 0.375310384 | mirna_lnc |
| 32274 | hsa-mir-324   | AC015818.2   | 0.342174938 | mirna_lnc |
| 32275 | hsa-mir-324   | AC004069.1   | 0.378778494 | mirna_lnc |
| 32276 | hsa-mir-324   | LNCOC1       | 0.303198671 | mirna_lnc |
| 32277 | hsa-mir-324   | LINC01096    | 0.358005246 | mirna_lnc |
| 32278 | hsa-mir-324   | AC004920.1   | 0.350018643 | mirna_lnc |
| 32279 | hsa-mir-324   | AC021683.3   | 0.370064117 | mirna_lnc |
| 32280 | hsa-mir-324   | AC011481.4   | 0.302010961 | mirna_lnc |
| 32281 | hsa-mir-324   | AL391069.2   | 0.318688634 | mirna_lnc |
| 32282 | hsa-mir-324   | AC012640.2   | 0.397252625 | mirna_lnc |
| 32283 | hsa-mir-324   | AC026782.2   | 0.310498978 | mirna_lnc |
| 32284 | hsa-mir-324   | AC116049.2   | 0.416455676 | mirna_lnc |
| 32285 | hsa-mir-324   | AL139023.1   | 0.361589348 | mirna_lnc |
| 32286 | hsa-mir-324   | AP003119.2   | 0.331155842 | mirna_lnc |
| 32287 | hsa-mir-324   | AL513497.1   | 0.31844307  | mirna_lnc |
| 32288 | hsa-mir-324   | ATP6V1B1-AS1 | 0.358980679 | mirna_lnc |
| 32289 | hsa-mir-324   | AJ239322.1   | 0.350905916 | mirna_lnc |
| 32290 | hsa-mir-324   | AC024230.1   | 0.382979548 | mirna_lnc |
| 32291 | hsa-mir-324   | LINC01424    | 0.415952674 | mirna_lnc |

|                   |              |                       |
|-------------------|--------------|-----------------------|
| 32292 hsa-mir-324 | AL391152.1   | 0.313121714 mirna_lnc |
| 32293 hsa-mir-324 | TBC1D8-AS1   | 0.439919827 mirna_lnc |
| 32294 hsa-mir-324 | AP000487.1   | 0.304092631 mirna_lnc |
| 32295 hsa-mir-324 | KIAA1614-AS1 | 0.334207881 mirna_lnc |
| 32296 hsa-mir-324 | AC016876.3   | 0.440056966 mirna_lnc |
| 32297 hsa-mir-324 | AL359643.3   | 0.354916293 mirna_lnc |
| 32298 hsa-mir-324 | AL513327.2   | 0.389824596 mirna_lnc |
| 32299 hsa-mir-324 | LINC01456    | 0.332102556 mirna_lnc |
| 32300 hsa-mir-324 | AC092807.2   | 0.36063062 mirna_lnc  |
| 32301 hsa-mir-324 | AC002076.1   | 0.350512239 mirna_lnc |
| 32302 hsa-mir-324 | LINC01850    | 0.386996896 mirna_lnc |
| 32303 hsa-mir-324 | LINC01686    | 0.366701274 mirna_lnc |
| 32304 hsa-mir-324 | Z95115.1     | 0.346921617 mirna_lnc |
| 32305 hsa-mir-324 | LINC01143    | 0.327694348 mirna_lnc |
| 32306 hsa-mir-324 | AC022031.2   | 0.305825253 mirna_lnc |
| 32307 hsa-mir-324 | AC100782.1   | 0.334010953 mirna_lnc |
| 32308 hsa-mir-324 | AC010595.1   | 0.316876624 mirna_lnc |
| 32309 hsa-mir-324 | AL391069.3   | 0.32190616 mirna_lnc  |
| 32310 hsa-mir-324 | LINC02607    | 0.395286648 mirna_lnc |
| 32311 hsa-mir-324 | LINC01816    | 0.403546733 mirna_lnc |
| 32312 hsa-mir-324 | TMC01-AS1    | 0.323932668 mirna_lnc |
| 32313 hsa-mir-324 | AC099518.6   | 0.342107526 mirna_lnc |
| 32314 hsa-mir-324 | AC007881.3   | 0.343150968 mirna_lnc |
| 32315 hsa-mir-324 | AL121658.1   | 0.308547509 mirna_lnc |
| 32316 hsa-mir-324 | LINC00167    | 0.328598107 mirna_lnc |
| 32317 hsa-mir-324 | LINC01521    | 0.398749765 mirna_lnc |
| 32318 hsa-mir-324 | AC100812.1   | 0.406167666 mirna_lnc |
| 32319 hsa-mir-324 | AC004943.3   | 0.309556636 mirna_lnc |
| 32320 hsa-mir-324 | AC145343.1   | 0.318098621 mirna_lnc |
| 32321 hsa-mir-324 | AC126614.1   | 0.353415801 mirna_lnc |
| 32322 hsa-mir-324 | AC093424.1   | 0.331797675 mirna_lnc |
| 32323 hsa-mir-324 | AL451085.2   | 0.360081246 mirna_lnc |
| 32324 hsa-mir-324 | AC091925.1   | 0.344054484 mirna_lnc |
| 32325 hsa-mir-324 | AC117382.2   | 0.349168458 mirna_lnc |
| 32326 hsa-mir-324 | AC091153.3   | 0.46276069 mirna_lnc  |
| 32327 hsa-mir-324 | AL121721.1   | 0.311239866 mirna_lnc |
| 32328 hsa-mir-324 | AC087742.1   | 0.422657031 mirna_lnc |
| 32329 hsa-mir-324 | AL354892.2   | 0.46973536 mirna_lnc  |
| 32330 hsa-mir-324 | AL139327.2   | 0.325113785 mirna_lnc |
| 32331 hsa-mir-324 | AL031963.3   | 0.318049761 mirna_lnc |
| 32332 hsa-mir-324 | AC106820.2   | 0.315255756 mirna_lnc |
| 32333 hsa-mir-324 | AC005993.1   | 0.307654788 mirna_lnc |
| 32334 hsa-mir-324 | AC026271.3   | 0.41770241 mirna_lnc  |
| 32335 hsa-mir-324 | AC016205.1   | 0.405476092 mirna_lnc |
| 32336 hsa-mir-324 | AC064836.3   | 0.326559427 mirna_lnc |
| 32337 hsa-mir-324 | BX088651.4   | 0.321841414 mirna_lnc |
| 32338 hsa-mir-324 | PIK3CD-AS2   | 0.353419466 mirna_lnc |
| 32339 hsa-mir-324 | AC012640.5   | 0.365485451 mirna_lnc |
| 32340 hsa-mir-324 | AL512408.1   | 0.439759059 mirna_lnc |
| 32341 hsa-mir-324 | AC090527.3   | 0.305424994 mirna_lnc |
| 32342 hsa-mir-324 | AL353719.1   | 0.300378725 mirna_lnc |
| 32343 hsa-mir-324 | AC010422.2   | 0.304348825 mirna_lnc |
| 32344 hsa-mir-324 | AC010275.1   | 0.332524834 mirna_lnc |
| 32345 hsa-mir-324 | AC010608.2   | 0.323279839 mirna_lnc |

|                   |             |                         |
|-------------------|-------------|-------------------------|
| 32346 hsa-mir-324 | AP002387. 2 | 0. 336926413 mirna_lnc  |
| 32347 hsa-mir-324 | AC005379. 1 | 0. 304010568 mirna_lnc  |
| 32348 hsa-mir-324 | LINC01063   | 0. 387928244 mirna_lnc  |
| 32349 hsa-mir-324 | AC092669. 1 | 0. 439095634 mirna_lnc  |
| 32350 hsa-mir-324 | CIRBP-AS1   | 0. 316083551 mirna_lnc  |
| 32351 hsa-mir-324 | AP002336. 2 | 0. 314898107 mirna_lnc  |
| 32352 hsa-mir-324 | AC091946. 2 | 0. 350317117 mirna_lnc  |
| 32353 hsa-mir-324 | AC092171. 3 | 0. 33647397 mirna_lnc   |
| 32354 hsa-mir-324 | CNNM3-DT    | 0. 384709847 mirna_lnc  |
| 32355 hsa-mir-324 | AC068831. 6 | 0. 311901258 mirna_lnc  |
| 32356 hsa-mir-324 | AL645608. 4 | 0. 342175979 mirna_lnc  |
| 32357 hsa-mir-324 | LINC02562   | 0. 31419159 mirna_lnc   |
| 32358 hsa-mir-324 | AC138696. 2 | 0. 343509059 mirna_lnc  |
| 32359 hsa-mir-324 | AC009271. 1 | 0. 39912928 mirna_lnc   |
| 32360 hsa-mir-324 | AC098818. 2 | 0. 338321071 mirna_lnc  |
| 32361 hsa-mir-324 | AC022762. 1 | 0. 304146238 mirna_lnc  |
| 32362 hsa-mir-324 | AC012146. 3 | 0. 300953703 mirna_lnc  |
| 32363 hsa-mir-324 | AC008267. 5 | 0. 349765816 mirna_lnc  |
| 32364 hsa-mir-324 | AC005695. 3 | 0. 305647192 mirna_lnc  |
| 32365 hsa-mir-324 | AC107214. 1 | 0. 364179855 mirna_lnc  |
| 32366 hsa-mir-324 | LINC00885   | 0. 433343707 mirna_lnc  |
| 32367 hsa-mir-324 | AP005328. 2 | 0. 360276649 mirna_lnc  |
| 32368 hsa-mir-324 | URB1-AS1    | 0. 358582275 mirna_lnc  |
| 32369 hsa-mir-324 | AC091271. 1 | 0. 357520789 mirna_lnc  |
| 32370 hsa-mir-324 | AL590399. 1 | 0. 352848859 mirna_lnc  |
| 32371 hsa-mir-324 | AC096992. 2 | 0. 305717232 mirna_lnc  |
| 32372 hsa-mir-324 | AC010186. 1 | 0. 302549895 mirna_lnc  |
| 32373 hsa-mir-324 | HHIP-AS1    | 0. 338968199 mirna_lnc  |
| 32374 hsa-mir-324 | ELDR        | 0. 461540241 mirna_lnc  |
| 32375 hsa-mir-324 | AC090617. 5 | 0. 365106332 mirna_lnc  |
| 32376 hsa-mir-324 | AC005790. 1 | 0. 407516077 mirna_lnc  |
| 32377 hsa-mir-324 | AC010336. 2 | 0. 357696478 mirna_lnc  |
| 32378 hsa-mir-324 | AL359091. 5 | 0. 347849455 mirna_lnc  |
| 32379 hsa-mir-324 | AC023355. 1 | 0. 326293368 mirna_lnc  |
| 32380 hsa-mir-324 | AL606760. 3 | 0. 352850239 mirna_lnc  |
| 32381 hsa-mir-324 | AL591167. 1 | 0. 305820492 mirna_lnc  |
| 32382 hsa-mir-324 | AC093677. 2 | 0. 365096032 mirna_lnc  |
| 32383 hsa-mir-324 | IQCA1-AS1   | 0. 32360054 mirna_lnc   |
| 32384 hsa-mir-324 | AC117395. 1 | 0. 354110422 mirna_lnc  |
| 32385 hsa-mir-324 | INTS6L-AS1  | 0. 310201472 mirna_lnc  |
| 32386 hsa-mir-324 | AC083880. 1 | 0. 326415092 mirna_lnc  |
| 32387 hsa-mir-324 | TERC        | 0. 358990658 mirna_lnc  |
| 32388 hsa-mir-324 | AL121601. 1 | 0. 300306087 mirna_lnc  |
| 32389 hsa-mir-324 | AC012645. 1 | 0. 319925562 mirna_lnc  |
| 32390 hsa-mir-324 | LINC01607   | 0. 3077700327 mirna_lnc |
| 32391 hsa-mir-324 | AP000892. 1 | 0. 319132806 mirna_lnc  |
| 32392 hsa-mir-324 | AC007541. 1 | 0. 328372463 mirna_lnc  |
| 32393 hsa-mir-324 | AC007389. 5 | 0. 359291496 mirna_lnc  |
| 32394 hsa-mir-324 | AC108865. 2 | 0. 32134663 mirna_lnc   |
| 32395 hsa-mir-324 | AC010834. 2 | 0. 316035478 mirna_lnc  |
| 32396 hsa-mir-324 | AP005205. 2 | 0. 318845474 mirna_lnc  |
| 32397 hsa-mir-324 | AL022341. 1 | 0. 327893099 mirna_lnc  |
| 32398 hsa-mir-324 | AP000251. 1 | 0. 534964537 mirna_lnc  |
| 32399 hsa-mir-324 | AC025219. 1 | 0. 356916392 mirna_lnc  |

|                   |             |                       |
|-------------------|-------------|-----------------------|
| 32400 hsa-mir-324 | LINC01901   | 0.383551033 mirna_lnc |
| 32401 hsa-mir-324 | AC025575.2  | 0.300710741 mirna_lnc |
| 32402 hsa-mir-324 | BX005266.2  | 0.327638121 mirna_lnc |
| 32403 hsa-mir-324 | AC090907.1  | 0.313853253 mirna_lnc |
| 32404 hsa-mir-324 | LINC01715   | 0.328912623 mirna_lnc |
| 32405 hsa-mir-324 | OBSCN-AS1   | 0.324578869 mirna_lnc |
| 32406 hsa-mir-324 | PITPNA-AS1  | 0.429180018 mirna_lnc |
| 32407 hsa-mir-324 | SCAT8       | 0.346739284 mirna_lnc |
| 32408 hsa-mir-324 | AL356488.3  | 0.332806048 mirna_lnc |
| 32409 hsa-mir-324 | SEMA6A-AS2  | 0.327002558 mirna_lnc |
| 32410 hsa-mir-324 | AL032819.1  | 0.355051467 mirna_lnc |
| 32411 hsa-mir-324 | AL844908.2  | 0.385253125 mirna_lnc |
| 32412 hsa-mir-324 | AC092119.3  | 0.308603195 mirna_lnc |
| 32413 hsa-mir-324 | AC069307.1  | 0.319343403 mirna_lnc |
| 32414 hsa-mir-324 | AC010501.1  | 0.306955011 mirna_lnc |
| 32415 hsa-mir-324 | AC004012.1  | 0.323532892 mirna_lnc |
| 32416 hsa-mir-324 | AC117402.1  | 0.388394882 mirna_lnc |
| 32417 hsa-mir-324 | ZFHX4-AS1   | 0.32355535 mirna_lnc  |
| 32418 hsa-mir-324 | LINC02506   | 0.308464515 mirna_lnc |
| 32419 hsa-mir-324 | AC005336.3  | 0.336544532 mirna_lnc |
| 32420 hsa-mir-324 | AL583808.1  | 0.429184496 mirna_lnc |
| 32421 hsa-mir-324 | AP005205.3  | 0.31742147 mirna_lnc  |
| 32422 hsa-mir-324 | AC005034.4  | 0.318767214 mirna_lnc |
| 32423 hsa-mir-324 | GIHCG       | 0.403793844 mirna_lnc |
| 32424 hsa-mir-324 | Z93241.1    | 0.308802086 mirna_lnc |
| 32425 hsa-mir-324 | AP000808.2  | 0.302144835 mirna_lnc |
| 32426 hsa-mir-324 | AL731537.1  | 0.335932813 mirna_lnc |
| 32427 hsa-mir-324 | GTSE1-DT    | 0.309882953 mirna_lnc |
| 32428 hsa-mir-324 | AC079414.3  | 0.309221502 mirna_lnc |
| 32429 hsa-mir-324 | AC135178.5  | 0.44878909 mirna_lnc  |
| 32430 hsa-mir-324 | AC107027.1  | 0.300577507 mirna_lnc |
| 32431 hsa-mir-324 | AC106820.4  | 0.347136105 mirna_lnc |
| 32432 hsa-mir-324 | AL645608.6  | 0.362070044 mirna_lnc |
| 32433 hsa-mir-324 | AC231981.1  | 0.323167392 mirna_lnc |
| 32434 hsa-mir-324 | AC010980.2  | 0.303105861 mirna_lnc |
| 32435 hsa-mir-324 | AC025162.2  | 0.307007413 mirna_lnc |
| 32436 hsa-mir-324 | LINC01918   | 0.336369467 mirna_lnc |
| 32437 hsa-mir-324 | PARD3-AS1   | 0.309450797 mirna_lnc |
| 32438 hsa-mir-324 | LINC00909   | 0.316516908 mirna_lnc |
| 32439 hsa-mir-324 | AC007497.1  | 0.328055839 mirna_lnc |
| 32440 hsa-mir-324 | AC005197.1  | 0.343570056 mirna_lnc |
| 32441 hsa-mir-324 | AC145423.2  | 0.360042161 mirna_lnc |
| 32442 hsa-mir-324 | AL359504.2  | 0.384117121 mirna_lnc |
| 32443 hsa-mir-324 | AC012313.9  | 0.302216412 mirna_lnc |
| 32444 hsa-mir-324 | CYP51A1-AS1 | 0.330622882 mirna_lnc |
| 32445 hsa-mir-324 | RN7SL832P   | 0.385437698 mirna_lnc |
| 32446 hsa-mir-324 | AL358933.1  | 0.325553257 mirna_lnc |
| 32447 hsa-mir-324 | AL662791.1  | 0.326892469 mirna_lnc |
| 32448 hsa-mir-324 | AP001972.4  | 0.333116381 mirna_lnc |
| 32449 hsa-mir-324 | AL590705.3  | 0.315459517 mirna_lnc |
| 32450 hsa-mir-324 | AL132655.1  | 0.404659018 mirna_lnc |
| 32451 hsa-mir-324 | AL645608.2  | 0.343373592 mirna_lnc |
| 32452 hsa-mir-324 | AC015917.2  | 0.321808343 mirna_lnc |
| 32453 hsa-mir-324 | AC099684.2  | 0.301969257 mirna_lnc |

|                    |            |                       |
|--------------------|------------|-----------------------|
| 32454 hsa-mir-324  | AC108704.1 | 0.346535253 mirna_lnc |
| 32455 hsa-mir-3615 | TYMSOS     | 0.321100313 mirna_lnc |
| 32456 hsa-mir-3615 | LINC02595  | 0.326667424 mirna_lnc |
| 32457 hsa-mir-3615 | LINC01873  | 0.399669777 mirna_lnc |
| 32458 hsa-mir-3615 | TMPO-AS1   | 0.344278788 mirna_lnc |
| 32459 hsa-mir-3615 | AL121832.2 | 0.364422283 mirna_lnc |
| 32460 hsa-mir-3615 | AC103591.3 | 0.350030963 mirna_lnc |
| 32461 hsa-mir-3615 | AC004241.3 | 0.429852998 mirna_lnc |
| 32462 hsa-mir-3615 | AL117332.1 | 0.387403168 mirna_lnc |
| 32463 hsa-mir-3615 | AC022211.2 | 0.309242361 mirna_lnc |
| 32464 hsa-mir-3615 | CEP83-DT   | 0.309927968 mirna_lnc |
| 32465 hsa-mir-3615 | AC019069.1 | 0.368618588 mirna_lnc |
| 32466 hsa-mir-3615 | AL590326.1 | 0.320722878 mirna_lnc |
| 32467 hsa-mir-3615 | JARID2-AS1 | 0.50136574 mirna_lnc  |
| 32468 hsa-mir-3615 | AC016065.1 | 0.302689041 mirna_lnc |
| 32469 hsa-mir-3615 | AC074117.1 | 0.429168448 mirna_lnc |
| 32470 hsa-mir-3615 | AL031667.3 | 0.44982063 mirna_lnc  |
| 32471 hsa-mir-3615 | TFAP2A-AS1 | 0.448257908 mirna_lnc |
| 32472 hsa-mir-3615 | AC097358.2 | 0.318802349 mirna_lnc |
| 32473 hsa-mir-3615 | AC004812.2 | 0.330576324 mirna_lnc |
| 32474 hsa-mir-3615 | AC100791.2 | 0.357706107 mirna_lnc |
| 32475 hsa-mir-3615 | AC015982.1 | 0.316512815 mirna_lnc |
| 32476 hsa-mir-3615 | LINC02542  | 0.33604022 mirna_lnc  |
| 32477 hsa-mir-3615 | AC092159.2 | 0.301276939 mirna_lnc |
| 32478 hsa-mir-3615 | AC005840.2 | 0.326393699 mirna_lnc |
| 32479 hsa-mir-3615 | AL023803.3 | 0.396722565 mirna_lnc |
| 32480 hsa-mir-3615 | AC017083.1 | 0.411283696 mirna_lnc |
| 32481 hsa-mir-3615 | AL121655.1 | 0.318170732 mirna_lnc |
| 32482 hsa-mir-3615 | AC109322.1 | 0.40523982 mirna_lnc  |
| 32483 hsa-mir-3615 | AC074351.1 | 0.357431583 mirna_lnc |
| 32484 hsa-mir-3615 | KC877982.1 | 0.326733161 mirna_lnc |
| 32485 hsa-mir-3615 | AL445072.1 | 0.398070603 mirna_lnc |
| 32486 hsa-mir-3615 | AL592301.1 | 0.336138524 mirna_lnc |
| 32487 hsa-mir-3615 | AL137802.2 | 0.353007074 mirna_lnc |
| 32488 hsa-mir-3615 | AC087289.3 | 0.349789688 mirna_lnc |
| 32489 hsa-mir-3615 | LINC01806  | 0.3840394 mirna_lnc   |
| 32490 hsa-mir-3615 | AL136162.1 | 0.531531711 mirna_lnc |
| 32491 hsa-mir-3615 | AC073195.1 | 0.477946404 mirna_lnc |
| 32492 hsa-mir-3615 | AC015818.2 | 0.33176352 mirna_lnc  |
| 32493 hsa-mir-3615 | AL596094.1 | 0.438276137 mirna_lnc |
| 32494 hsa-mir-3615 | AC004069.1 | 0.453889233 mirna_lnc |
| 32495 hsa-mir-3615 | AC131025.1 | 0.306519697 mirna_lnc |
| 32496 hsa-mir-3615 | AC004920.1 | 0.470115361 mirna_lnc |
| 32497 hsa-mir-3615 | AC021683.3 | 0.51136684 mirna_lnc  |
| 32498 hsa-mir-3615 | AC012640.2 | 0.39827773 mirna_lnc  |
| 32499 hsa-mir-3615 | AC090970.2 | 0.42240636 mirna_lnc  |
| 32500 hsa-mir-3615 | AC026782.2 | 0.3620771 mirna_lnc   |
| 32501 hsa-mir-3615 | AP003119.2 | 0.362858664 mirna_lnc |
| 32502 hsa-mir-3615 | ILF3-DT    | 0.323460295 mirna_lnc |
| 32503 hsa-mir-3615 | AC002470.1 | 0.317899368 mirna_lnc |
| 32504 hsa-mir-3615 | AC012625.1 | 0.311185849 mirna_lnc |
| 32505 hsa-mir-3615 | AL353764.1 | 0.377024128 mirna_lnc |
| 32506 hsa-mir-3615 | AC040169.1 | 0.339895946 mirna_lnc |
| 32507 hsa-mir-3615 | AC013400.1 | 0.440425124 mirna_lnc |

|                    |              |                       |
|--------------------|--------------|-----------------------|
| 32508 hsa-mir-3615 | LINC01424    | 0.479120202 mirna_lnc |
| 32509 hsa-mir-3615 | TBC1D8-AS1   | 0.461928486 mirna_lnc |
| 32510 hsa-mir-3615 | TIPARP-AS1   | 0.322470746 mirna_lnc |
| 32511 hsa-mir-3615 | KIAA1614-AS1 | 0.439871672 mirna_lnc |
| 32512 hsa-mir-3615 | AC016876.3   | 0.480711163 mirna_lnc |
| 32513 hsa-mir-3615 | AL031665.2   | 0.36051966 mirna_lnc  |
| 32514 hsa-mir-3615 | AL359643.3   | 0.344016197 mirna_lnc |
| 32515 hsa-mir-3615 | AL163051.1   | 0.386770663 mirna_lnc |
| 32516 hsa-mir-3615 | AL513327.2   | 0.422082642 mirna_lnc |
| 32517 hsa-mir-3615 | AC138356.1   | 0.455570817 mirna_lnc |
| 32518 hsa-mir-3615 | LINC01456    | 0.318097927 mirna_lnc |
| 32519 hsa-mir-3615 | LINC01850    | 0.404924378 mirna_lnc |
| 32520 hsa-mir-3615 | AC007952.4   | 0.368508989 mirna_lnc |
| 32521 hsa-mir-3615 | AL683887.1   | 0.342220519 mirna_lnc |
| 32522 hsa-mir-3615 | AC005670.1   | 0.430187029 mirna_lnc |
| 32523 hsa-mir-3615 | AL445228.2   | 0.301569752 mirna_lnc |
| 32524 hsa-mir-3615 | AC239799.1   | 0.340537567 mirna_lnc |
| 32525 hsa-mir-3615 | AC010595.1   | 0.387940907 mirna_lnc |
| 32526 hsa-mir-3615 | AL391069.3   | 0.353002989 mirna_lnc |
| 32527 hsa-mir-3615 | LINC02607    | 0.495507305 mirna_lnc |
| 32528 hsa-mir-3615 | LINC01816    | 0.514296039 mirna_lnc |
| 32529 hsa-mir-3615 | TMC01-AS1    | 0.308169934 mirna_lnc |
| 32530 hsa-mir-3615 | AC099518.6   | 0.492950995 mirna_lnc |
| 32531 hsa-mir-3615 | AC007881.3   | 0.481062454 mirna_lnc |
| 32532 hsa-mir-3615 | AL121658.1   | 0.458461319 mirna_lnc |
| 32533 hsa-mir-3615 | AC010969.2   | 0.498573865 mirna_lnc |
| 32534 hsa-mir-3615 | AC022098.3   | 0.304641071 mirna_lnc |
| 32535 hsa-mir-3615 | LINC00167    | 0.478240769 mirna_lnc |
| 32536 hsa-mir-3615 | AC046143.2   | 0.35684731 mirna_lnc  |
| 32537 hsa-mir-3615 | AC145343.1   | 0.405726021 mirna_lnc |
| 32538 hsa-mir-3615 | AC093424.1   | 0.411247637 mirna_lnc |
| 32539 hsa-mir-3615 | DGUOK-AS1    | 0.321226339 mirna_lnc |
| 32540 hsa-mir-3615 | AC091925.1   | 0.361489133 mirna_lnc |
| 32541 hsa-mir-3615 | AC117382.2   | 0.458463615 mirna_lnc |
| 32542 hsa-mir-3615 | AC091153.3   | 0.449530919 mirna_lnc |
| 32543 hsa-mir-3615 | AC063948.1   | 0.439768298 mirna_lnc |
| 32544 hsa-mir-3615 | AL023803.1   | 0.330760933 mirna_lnc |
| 32545 hsa-mir-3615 | AC087742.1   | 0.406771513 mirna_lnc |
| 32546 hsa-mir-3615 | AL354892.2   | 0.4250946 mirna_lnc   |
| 32547 hsa-mir-3615 | AC015802.5   | 0.325687705 mirna_lnc |
| 32548 hsa-mir-3615 | AL139327.2   | 0.404829226 mirna_lnc |
| 32549 hsa-mir-3615 | DDX39B-AS1   | 0.362514615 mirna_lnc |
| 32550 hsa-mir-3615 | AL031963.3   | 0.328000928 mirna_lnc |
| 32551 hsa-mir-3615 | AC069148.1   | 0.315819951 mirna_lnc |
| 32552 hsa-mir-3615 | AC064836.3   | 0.43841203 mirna_lnc  |
| 32553 hsa-mir-3615 | AC012640.5   | 0.316577526 mirna_lnc |
| 32554 hsa-mir-3615 | AL512408.1   | 0.337435308 mirna_lnc |
| 32555 hsa-mir-3615 | AC090527.3   | 0.391223435 mirna_lnc |
| 32556 hsa-mir-3615 | AC010422.2   | 0.375080034 mirna_lnc |
| 32557 hsa-mir-3615 | RNASEH1-AS1  | 0.371804008 mirna_lnc |
| 32558 hsa-mir-3615 | LINC01063    | 0.475889484 mirna_lnc |
| 32559 hsa-mir-3615 | AC092669.1   | 0.426785247 mirna_lnc |
| 32560 hsa-mir-3615 | CIRBP-AS1    | 0.388121684 mirna_lnc |
| 32561 hsa-mir-3615 | AC099568.2   | 0.331316211 mirna_lnc |

|                    |             |                        |
|--------------------|-------------|------------------------|
| 32562 hsa-mir-3615 | AC020765. 2 | 0. 360537615 mirna_lnc |
| 32563 hsa-mir-3615 | AC084757. 2 | 0. 386912552 mirna_lnc |
| 32564 hsa-mir-3615 | AC040169. 3 | 0. 303778903 mirna_lnc |
| 32565 hsa-mir-3615 | EIF2AK3-DT  | 0. 331748918 mirna_lnc |
| 32566 hsa-mir-3615 | AC009171. 2 | 0. 398228024 mirna_lnc |
| 32567 hsa-mir-3615 | AC243830. 2 | 0. 333243293 mirna_lnc |
| 32568 hsa-mir-3615 | CNNM3-DT    | 0. 341828743 mirna_lnc |
| 32569 hsa-mir-3615 | AC068831. 6 | 0. 321974563 mirna_lnc |
| 32570 hsa-mir-3615 | AL355482. 2 | 0. 322661146 mirna_lnc |
| 32571 hsa-mir-3615 | AC080013. 5 | 0. 35896011 mirna_lnc  |
| 32572 hsa-mir-3615 | AL645608. 4 | 0. 342475308 mirna_lnc |
| 32573 hsa-mir-3615 | AC138696. 2 | 0. 367249951 mirna_lnc |
| 32574 hsa-mir-3615 | MAST4-AS1   | 0. 396846067 mirna_lnc |
| 32575 hsa-mir-3615 | AC010654. 1 | 0. 316027281 mirna_lnc |
| 32576 hsa-mir-3615 | AC090774. 2 | 0. 327900773 mirna_lnc |
| 32577 hsa-mir-3615 | AC007773. 1 | 0. 301781997 mirna_lnc |
| 32578 hsa-mir-3615 | AP000894. 4 | 0. 311311661 mirna_lnc |
| 32579 hsa-mir-3615 | AC022762. 1 | 0. 353302468 mirna_lnc |
| 32580 hsa-mir-3615 | AC008267. 5 | 0. 366173916 mirna_lnc |
| 32581 hsa-mir-3615 | AC005695. 3 | 0. 34610943 mirna_lnc  |
| 32582 hsa-mir-3615 | AC107214. 1 | 0. 364016228 mirna_lnc |
| 32583 hsa-mir-3615 | AC034236. 2 | 0. 35014766 mirna_lnc  |
| 32584 hsa-mir-3615 | AC131235. 3 | 0. 305471627 mirna_lnc |
| 32585 hsa-mir-3615 | AC005005. 3 | 0. 374498698 mirna_lnc |
| 32586 hsa-mir-3615 | AC073896. 4 | 0. 359788948 mirna_lnc |
| 32587 hsa-mir-3615 | C11orf72    | 0. 342175606 mirna_lnc |
| 32588 hsa-mir-3615 | AC108865. 1 | 0. 381719461 mirna_lnc |
| 32589 hsa-mir-3615 | URB1-AS1    | 0. 407284949 mirna_lnc |
| 32590 hsa-mir-3615 | AC024243. 1 | 0. 312164369 mirna_lnc |
| 32591 hsa-mir-3615 | AC011446. 1 | 0. 355410644 mirna_lnc |
| 32592 hsa-mir-3615 | AL132712. 2 | 0. 31670115 mirna_lnc  |
| 32593 hsa-mir-3615 | AC008736. 2 | 0. 367952494 mirna_lnc |
| 32594 hsa-mir-3615 | AC091271. 1 | 0. 394790111 mirna_lnc |
| 32595 hsa-mir-3615 | AL590399. 1 | 0. 365925787 mirna_lnc |
| 32596 hsa-mir-3615 | AC026304. 1 | 0. 442359164 mirna_lnc |
| 32597 hsa-mir-3615 | AC096992. 2 | 0. 363550441 mirna_lnc |
| 32598 hsa-mir-3615 | LPP-AS2     | 0. 316563869 mirna_lnc |
| 32599 hsa-mir-3615 | AC005304. 3 | 0. 343670417 mirna_lnc |
| 32600 hsa-mir-3615 | AC010186. 1 | 0. 461046745 mirna_lnc |
| 32601 hsa-mir-3615 | ELDR        | 0. 440214704 mirna_lnc |
| 32602 hsa-mir-3615 | AC019129. 2 | 0. 41533648 mirna_lnc  |
| 32603 hsa-mir-3615 | AC005790. 1 | 0. 386409303 mirna_lnc |
| 32604 hsa-mir-3615 | AP001775. 2 | 0. 368109123 mirna_lnc |
| 32605 hsa-mir-3615 | AL132712. 1 | 0. 330405695 mirna_lnc |
| 32606 hsa-mir-3615 | AC023355. 1 | 0. 341123472 mirna_lnc |
| 32607 hsa-mir-3615 | AC093677. 2 | 0. 473916409 mirna_lnc |
| 32608 hsa-mir-3615 | IQCA1-AS1   | 0. 322888358 mirna_lnc |
| 32609 hsa-mir-3615 | INTS6L-AS1  | 0. 332977632 mirna_lnc |
| 32610 hsa-mir-3615 | AC083880. 1 | 0. 4333188 mirna_lnc   |
| 32611 hsa-mir-3615 | TERC        | 0. 302861424 mirna_lnc |
| 32612 hsa-mir-3615 | AC099522. 2 | 0. 351362165 mirna_lnc |
| 32613 hsa-mir-3615 | LINC01607   | 0. 366328301 mirna_lnc |
| 32614 hsa-mir-3615 | AC008883. 2 | 0. 305464714 mirna_lnc |
| 32615 hsa-mir-3615 | AC007389. 5 | 0. 440323681 mirna_lnc |



|                    |             |                       |
|--------------------|-------------|-----------------------|
| 32616 hsa-mir-3615 | AC108865.2  | 0.494049611 mirna_lnc |
| 32617 hsa-mir-3615 | AC010834.2  | 0.378255747 mirna_lnc |
| 32618 hsa-mir-3615 | AL022341.1  | 0.342050123 mirna_lnc |
| 32619 hsa-mir-3615 | AP000251.1  | 0.484958586 mirna_lnc |
| 32620 hsa-mir-3615 | AC025575.2  | 0.346193873 mirna_lnc |
| 32621 hsa-mir-3615 | CPNE8-AS1   | 0.342809102 mirna_lnc |
| 32622 hsa-mir-3615 | AL138881.1  | 0.437311205 mirna_lnc |
| 32623 hsa-mir-3615 | AC090907.1  | 0.403220609 mirna_lnc |
| 32624 hsa-mir-3615 | AC093635.1  | 0.49601056 mirna_lnc  |
| 32625 hsa-mir-3615 | LINC01715   | 0.429600902 mirna_lnc |
| 32626 hsa-mir-3615 | AC009560.1  | 0.357640612 mirna_lnc |
| 32627 hsa-mir-3615 | AL590822.1  | 0.32793631 mirna_lnc  |
| 32628 hsa-mir-3615 | AC093510.1  | 0.311125986 mirna_lnc |
| 32629 hsa-mir-3615 | BRWD1-AS2   | 0.316964058 mirna_lnc |
| 32630 hsa-mir-3615 | AL157813.1  | 0.425291654 mirna_lnc |
| 32631 hsa-mir-3615 | AC027644.3  | 0.442738428 mirna_lnc |
| 32632 hsa-mir-3615 | AGBL5-AS1   | 0.319058864 mirna_lnc |
| 32633 hsa-mir-3615 | AC007114.1  | 0.326948716 mirna_lnc |
| 32634 hsa-mir-3615 | SCAT8       | 0.501569696 mirna_lnc |
| 32635 hsa-mir-3615 | AL356488.3  | 0.444192371 mirna_lnc |
| 32636 hsa-mir-3615 | AP000692.2  | 0.303673902 mirna_lnc |
| 32637 hsa-mir-3615 | AC069277.1  | 0.367674723 mirna_lnc |
| 32638 hsa-mir-3615 | AL032819.1  | 0.490665172 mirna_lnc |
| 32639 hsa-mir-3615 | AL844908.2  | 0.398981857 mirna_lnc |
| 32640 hsa-mir-3615 | AC092119.3  | 0.435384209 mirna_lnc |
| 32641 hsa-mir-3615 | AC069307.1  | 0.371995093 mirna_lnc |
| 32642 hsa-mir-3615 | AC099343.3  | 0.353882162 mirna_lnc |
| 32643 hsa-mir-3615 | HDAC4-AS1   | 0.401226314 mirna_lnc |
| 32644 hsa-mir-3615 | AL021154.1  | 0.40557412 mirna_lnc  |
| 32645 hsa-mir-3615 | AL359198.1  | 0.339399174 mirna_lnc |
| 32646 hsa-mir-3615 | AC004012.1  | 0.483540719 mirna_lnc |
| 32647 hsa-mir-3615 | AL583808.1  | 0.437854422 mirna_lnc |
| 32648 hsa-mir-3615 | AP003392.3  | 0.400900847 mirna_lnc |
| 32649 hsa-mir-3615 | Z93241.1    | 0.333099492 mirna_lnc |
| 32650 hsa-mir-3615 | AL359878.2  | 0.404184134 mirna_lnc |
| 32651 hsa-mir-3615 | AC068338.2  | 0.343592431 mirna_lnc |
| 32652 hsa-mir-3615 | AL731537.1  | 0.387281858 mirna_lnc |
| 32653 hsa-mir-3615 | GTSE1-DT    | 0.315427622 mirna_lnc |
| 32654 hsa-mir-3615 | AC079414.3  | 0.310009826 mirna_lnc |
| 32655 hsa-mir-3615 | AC135178.5  | 0.320720976 mirna_lnc |
| 32656 hsa-mir-3615 | KCNJ2-AS1   | 0.473958898 mirna_lnc |
| 32657 hsa-mir-3615 | AC002059.1  | 0.469105599 mirna_lnc |
| 32658 hsa-mir-3615 | AL645608.6  | 0.347111585 mirna_lnc |
| 32659 hsa-mir-3615 | AC000120.1  | 0.301840902 mirna_lnc |
| 32660 hsa-mir-3615 | AC010980.2  | 0.363721863 mirna_lnc |
| 32661 hsa-mir-3615 | PARD3-AS1   | 0.329643576 mirna_lnc |
| 32662 hsa-mir-3615 | AC136604.3  | 0.327177587 mirna_lnc |
| 32663 hsa-mir-3615 | AC130343.2  | 0.313009673 mirna_lnc |
| 32664 hsa-mir-3615 | AC145423.2  | 0.347934441 mirna_lnc |
| 32665 hsa-mir-3615 | AC092142.1  | 0.408187211 mirna_lnc |
| 32666 hsa-mir-3615 | AC012313.9  | 0.319050611 mirna_lnc |
| 32667 hsa-mir-3615 | CYP51A1-AS1 | 0.431837163 mirna_lnc |
| 32668 hsa-mir-3615 | AC005696.4  | 0.32907295 mirna_lnc  |
| 32669 hsa-mir-3615 | AL512791.2  | 0.30284802 mirna_lnc  |

|                    |             |                       |
|--------------------|-------------|-----------------------|
| 32670 hsa-mir-3615 | RN7SL832P   | 0.506226572 mirna_lnc |
| 32671 hsa-mir-3615 | LINC02094   | 0.304893744 mirna_lnc |
| 32672 hsa-mir-3615 | AL138966.2  | 0.396126283 mirna_lnc |
| 32673 hsa-mir-3615 | AL358933.1  | 0.355663713 mirna_lnc |
| 32674 hsa-mir-3615 | LINC00112   | 0.325110083 mirna_lnc |
| 32675 hsa-mir-3615 | AP001972.4  | 0.380843784 mirna_lnc |
| 32676 hsa-mir-3615 | AL590705.3  | 0.481447366 mirna_lnc |
| 32677 hsa-mir-3615 | AL132655.1  | 0.330175485 mirna_lnc |
| 32678 hsa-mir-3615 | AC079610.2  | 0.378050453 mirna_lnc |
| 32679 hsa-mir-3615 | AC015917.2  | 0.32350222 mirna_lnc  |
| 32680 hsa-mir-3615 | AP001412.1  | 0.303335823 mirna_lnc |
| 32681 hsa-mir-3615 | TOLLIP-AS1  | 0.327277845 mirna_lnc |
| 32682 hsa-mir-3615 | AL353708.1  | 0.327408235 mirna_lnc |
| 32683 hsa-mir-3615 | AC012676.3  | 0.412145902 mirna_lnc |
| 32684 hsa-mir-25   | AC092667.1  | 0.409000066 mirna_lnc |
| 32685 hsa-mir-25   | AC012073.1  | 0.495624778 mirna_lnc |
| 32686 hsa-mir-25   | TMPO-AS1    | 0.360675358 mirna_lnc |
| 32687 hsa-mir-25   | SLC12A9-AS1 | 0.435212142 mirna_lnc |
| 32688 hsa-mir-25   | AP000808.1  | 0.540909526 mirna_lnc |
| 32689 hsa-mir-25   | AC092614.1  | 0.422680937 mirna_lnc |
| 32690 hsa-mir-25   | CEP83-DT    | 0.343431378 mirna_lnc |
| 32691 hsa-mir-25   | HOXC-AS2    | 0.352490229 mirna_lnc |
| 32692 hsa-mir-25   | AP001469.3  | 0.338847515 mirna_lnc |
| 32693 hsa-mir-25   | AC011199.1  | 0.34447831 mirna_lnc  |
| 32694 hsa-mir-25   | AP003071.2  | 0.490828973 mirna_lnc |
| 32695 hsa-mir-25   | AC073842.2  | 0.421240342 mirna_lnc |
| 32696 hsa-mir-25   | AC090159.1  | 0.312989377 mirna_lnc |
| 32697 hsa-mir-25   | AC092803.2  | 0.321044744 mirna_lnc |
| 32698 hsa-mir-25   | AC147651.4  | 0.451869127 mirna_lnc |
| 32699 hsa-mir-25   | AL121759.1  | 0.311665383 mirna_lnc |
| 32700 hsa-mir-25   | AC009121.1  | 0.318525676 mirna_lnc |
| 32701 hsa-mir-25   | LINC02042   | 0.317442108 mirna_lnc |
| 32702 hsa-mir-25   | AC073857.1  | 0.302864231 mirna_lnc |
| 32703 hsa-mir-25   | AC015849.5  | 0.300548621 mirna_lnc |
| 32704 hsa-mir-25   | LINC02367   | 0.54802207 mirna_lnc  |
| 32705 hsa-mir-25   | LINC01096   | 0.487504373 mirna_lnc |
| 32706 hsa-mir-25   | AC012360.3  | 0.389843849 mirna_lnc |
| 32707 hsa-mir-25   | AC125494.2  | 0.300072594 mirna_lnc |
| 32708 hsa-mir-25   | AC024884.2  | 0.318821231 mirna_lnc |
| 32709 hsa-mir-25   | AC016705.2  | 0.343832159 mirna_lnc |
| 32710 hsa-mir-25   | AL391069.2  | 0.379072988 mirna_lnc |
| 32711 hsa-mir-25   | AC116049.2  | 0.471318199 mirna_lnc |
| 32712 hsa-mir-25   | AC024267.6  | 0.3043409 mirna_lnc   |
| 32713 hsa-mir-25   | AL133243.2  | 0.331622893 mirna_lnc |
| 32714 hsa-mir-25   | AC109347.2  | 0.401519473 mirna_lnc |
| 32715 hsa-mir-25   | AC130324.2  | 0.305916793 mirna_lnc |
| 32716 hsa-mir-25   | AC024230.1  | 0.525568891 mirna_lnc |
| 32717 hsa-mir-25   | LINC01397   | 0.440967938 mirna_lnc |
| 32718 hsa-mir-25   | AC138904.1  | 0.346918867 mirna_lnc |
| 32719 hsa-mir-25   | AC073517.1  | 0.365698967 mirna_lnc |
| 32720 hsa-mir-25   | AP000487.1  | 0.569489866 mirna_lnc |
| 32721 hsa-mir-25   | AC104971.1  | 0.350258085 mirna_lnc |
| 32722 hsa-mir-25   | AC002076.1  | 0.410761998 mirna_lnc |
| 32723 hsa-mir-25   | LINC01686   | 0.324206498 mirna_lnc |

|                  |             |                       |
|------------------|-------------|-----------------------|
| 32724 hsa-mir-25 | LINC01143   | 0.401836012 mirna_lnc |
| 32725 hsa-mir-25 | AC100782.1  | 0.358246911 mirna_lnc |
| 32726 hsa-mir-25 | AL354714.1  | 0.32569328 mirna_lnc  |
| 32727 hsa-mir-25 | AC104823.1  | 0.414724049 mirna_lnc |
| 32728 hsa-mir-25 | SREBF2-AS1  | 0.35737024 mirna_lnc  |
| 32729 hsa-mir-25 | AC078864.1  | 0.468738923 mirna_lnc |
| 32730 hsa-mir-25 | AC122694.1  | 0.370193112 mirna_lnc |
| 32731 hsa-mir-25 | AC073073.2  | 0.308231802 mirna_lnc |
| 32732 hsa-mir-25 | AC044781.1  | 0.502737636 mirna_lnc |
| 32733 hsa-mir-25 | AC011297.1  | 0.479304085 mirna_lnc |
| 32734 hsa-mir-25 | AC004943.3  | 0.323520934 mirna_lnc |
| 32735 hsa-mir-25 | AC003986.2  | 0.412586684 mirna_lnc |
| 32736 hsa-mir-25 | AL354892.2  | 0.389413137 mirna_lnc |
| 32737 hsa-mir-25 | AC106820.2  | 0.399018183 mirna_lnc |
| 32738 hsa-mir-25 | AC026271.3  | 0.513622772 mirna_lnc |
| 32739 hsa-mir-25 | AC016205.1  | 0.422755751 mirna_lnc |
| 32740 hsa-mir-25 | AC090527.3  | 0.304830592 mirna_lnc |
| 32741 hsa-mir-25 | MYB-AS1     | 0.5406744 mirna_lnc   |
| 32742 hsa-mir-25 | AC123905.1  | 0.349280669 mirna_lnc |
| 32743 hsa-mir-25 | RNASEH1-AS1 | 0.337017528 mirna_lnc |
| 32744 hsa-mir-25 | AP002387.2  | 0.300993096 mirna_lnc |
| 32745 hsa-mir-25 | AC131212.4  | 0.309687984 mirna_lnc |
| 32746 hsa-mir-25 | AL157392.1  | 0.397060397 mirna_lnc |
| 32747 hsa-mir-25 | AC092669.1  | 0.429324877 mirna_lnc |
| 32748 hsa-mir-25 | HGC6.3      | 0.409499072 mirna_lnc |
| 32749 hsa-mir-25 | AP002336.2  | 0.545109092 mirna_lnc |
| 32750 hsa-mir-25 | AC005838.2  | 0.322025223 mirna_lnc |
| 32751 hsa-mir-25 | PCOLCE-AS1  | 0.382259151 mirna_lnc |
| 32752 hsa-mir-25 | AC099568.2  | 0.309848498 mirna_lnc |
| 32753 hsa-mir-25 | AC011773.1  | 0.384615486 mirna_lnc |
| 32754 hsa-mir-25 | AC069222.1  | 0.372526948 mirna_lnc |
| 32755 hsa-mir-25 | LINC02562   | 0.363366601 mirna_lnc |
| 32756 hsa-mir-25 | AC126407.1  | 0.345482002 mirna_lnc |
| 32757 hsa-mir-25 | AC024560.3  | 0.329062101 mirna_lnc |
| 32758 hsa-mir-25 | NLGN4Y-AS1  | 0.311586421 mirna_lnc |
| 32759 hsa-mir-25 | AC009271.1  | 0.322090889 mirna_lnc |
| 32760 hsa-mir-25 | AC098818.2  | 0.361458183 mirna_lnc |
| 32761 hsa-mir-25 | AC068473.3  | 0.334372342 mirna_lnc |
| 32762 hsa-mir-25 | AC104596.1  | 0.360859554 mirna_lnc |
| 32763 hsa-mir-25 | AC107214.1  | 0.336535836 mirna_lnc |
| 32764 hsa-mir-25 | LINC00885   | 0.430433248 mirna_lnc |
| 32765 hsa-mir-25 | AL022324.3  | 0.322443414 mirna_lnc |
| 32766 hsa-mir-25 | AL157832.2  | 0.429773105 mirna_lnc |
| 32767 hsa-mir-25 | AP003071.1  | 0.496876394 mirna_lnc |
| 32768 hsa-mir-25 | AP000487.2  | 0.317803791 mirna_lnc |
| 32769 hsa-mir-25 | AL603832.1  | 0.308762221 mirna_lnc |
| 32770 hsa-mir-25 | HHIP-AS1    | 0.316257338 mirna_lnc |
| 32771 hsa-mir-25 | AL591167.1  | 0.406650299 mirna_lnc |
| 32772 hsa-mir-25 | AC083805.3  | 0.348161009 mirna_lnc |
| 32773 hsa-mir-25 | AC007384.1  | 0.307414645 mirna_lnc |
| 32774 hsa-mir-25 | AL031186.1  | 0.316480064 mirna_lnc |
| 32775 hsa-mir-25 | AC011450.1  | 0.306790842 mirna_lnc |
| 32776 hsa-mir-25 | LINC01258   | 0.303306804 mirna_lnc |
| 32777 hsa-mir-25 | AC007541.1  | 0.302288646 mirna_lnc |

|                   |            |                       |
|-------------------|------------|-----------------------|
| 32778 hsa-mir-25  | AC006946.2 | 0.381676546 mirna_lnc |
| 32779 hsa-mir-25  | AC025219.1 | 0.328214976 mirna_lnc |
| 32780 hsa-mir-25  | LINC01315  | 0.302754055 mirna_lnc |
| 32781 hsa-mir-25  | AC007250.1 | 0.369883621 mirna_lnc |
| 32782 hsa-mir-25  | AL138767.3 | 0.563955795 mirna_lnc |
| 32783 hsa-mir-25  | AC098936.1 | 0.528586477 mirna_lnc |
| 32784 hsa-mir-25  | AC138207.2 | 0.32206091 mirna_lnc  |
| 32785 hsa-mir-25  | ETV5-AS1   | 0.554539317 mirna_lnc |
| 32786 hsa-mir-25  | SEMA6A-AS2 | 0.305104814 mirna_lnc |
| 32787 hsa-mir-25  | AP001783.1 | 0.405671695 mirna_lnc |
| 32788 hsa-mir-25  | LINC02457  | 0.427300017 mirna_lnc |
| 32789 hsa-mir-25  | AL118511.1 | 0.472987798 mirna_lnc |
| 32790 hsa-mir-25  | AC027348.1 | 0.435902832 mirna_lnc |
| 32791 hsa-mir-25  | GIHCG      | 0.370929252 mirna_lnc |
| 32792 hsa-mir-25  | AL359881.3 | 0.377896388 mirna_lnc |
| 32793 hsa-mir-25  | AP000808.2 | 0.524249765 mirna_lnc |
| 32794 hsa-mir-25  | LINC02470  | 0.584549071 mirna_lnc |
| 32795 hsa-mir-25  | AC008443.3 | 0.342998943 mirna_lnc |
| 32796 hsa-mir-25  | AC106820.4 | 0.565839282 mirna_lnc |
| 32797 hsa-mir-25  | LINC00173  | 0.366385886 mirna_lnc |
| 32798 hsa-mir-25  | AC131159.1 | 0.330108963 mirna_lnc |
| 32799 hsa-mir-25  | LINC01918  | 0.322375418 mirna_lnc |
| 32800 hsa-mir-25  | AC007497.1 | 0.375498919 mirna_lnc |
| 32801 hsa-mir-25  | AC093788.1 | 0.316577964 mirna_lnc |
| 32802 hsa-mir-25  | AC145422.1 | 0.316008394 mirna_lnc |
| 32803 hsa-mir-25  | AC125603.4 | 0.425709424 mirna_lnc |
| 32804 hsa-mir-25  | LINC01936  | 0.434532191 mirna_lnc |
| 32805 hsa-mir-25  | AL358115.1 | 0.316452111 mirna_lnc |
| 32806 hsa-mir-25  | AC092718.5 | 0.309655962 mirna_lnc |
| 32807 hsa-mir-25  | AC097534.1 | 0.417318545 mirna_lnc |
| 32808 hsa-mir-25  | AC016229.2 | 0.337477394 mirna_lnc |
| 32809 hsa-mir-25  | AL596202.1 | 0.344892047 mirna_lnc |
| 32810 hsa-mir-25  | UBXN7-AS1  | 0.310729971 mirna_lnc |
| 32811 hsa-mir-25  | AF213884.3 | 0.475200779 mirna_lnc |
| 32812 hsa-mir-25  | AC008033.3 | 0.545615276 mirna_lnc |
| 32813 hsa-mir-25  | CAMTA1-IT1 | 0.400747553 mirna_lnc |
| 32814 hsa-mir-25  | AC108704.1 | 0.368786093 mirna_lnc |
| 32815 hsa-mir-25  | AP002490.1 | 0.373210627 mirna_lnc |
| 32816 hsa-mir-25  | AC009970.1 | 0.315721256 mirna_lnc |
| 32817 hsa-mir-15a | AL137060.1 | 0.388071046 mirna_lnc |
| 32818 hsa-mir-15a | AC245100.6 | 0.368104804 mirna_lnc |
| 32819 hsa-mir-15a | AC010761.2 | 0.33734722 mirna_lnc  |
| 32820 hsa-mir-15a | AC009630.2 | 0.308046335 mirna_lnc |
| 32821 hsa-mir-15a | Z94721.1   | 0.31945712 mirna_lnc  |
| 32822 hsa-mir-15a | AL035461.2 | 0.330680167 mirna_lnc |
| 32823 hsa-mir-15a | AL161891.1 | 0.432710641 mirna_lnc |
| 32824 hsa-mir-15a | AL353194.1 | 0.313215197 mirna_lnc |
| 32825 hsa-mir-15a | AL157932.1 | 0.452531814 mirna_lnc |
| 32826 hsa-mir-15a | AC002401.2 | 0.310511327 mirna_lnc |
| 32827 hsa-mir-15a | AL049539.1 | 0.34086879 mirna_lnc  |
| 32828 hsa-mir-15a | LINC02585  | 0.301802713 mirna_lnc |
| 32829 hsa-mir-15a | AC106820.3 | 0.309132105 mirna_lnc |
| 32830 hsa-mir-15a | AC079209.1 | 0.325713583 mirna_lnc |
| 32831 hsa-mir-15a | AC007639.1 | 0.365379559 mirna_lnc |

|                   |            |                       |
|-------------------|------------|-----------------------|
| 32832 hsa-mir-15a | AC123768.1 | 0.315859593 mirna_lnc |
| 32833 hsa-mir-15a | AC021945.1 | 0.357688773 mirna_lnc |
| 32834 hsa-mir-15a | AC025176.1 | 0.342318503 mirna_lnc |
| 32835 hsa-mir-15a | AC026250.1 | 0.301692449 mirna_lnc |
| 32836 hsa-mir-15a | AC009121.1 | 0.323643402 mirna_lnc |
| 32837 hsa-mir-15a | LINC00513  | 0.331177674 mirna_lnc |
| 32838 hsa-mir-15a | AC009652.2 | 0.330447714 mirna_lnc |
| 32839 hsa-mir-15a | AC006557.1 | 0.310533272 mirna_lnc |
| 32840 hsa-mir-15a | LINC02003  | 0.375664678 mirna_lnc |
| 32841 hsa-mir-15a | MCM8-AS1   | 0.331038725 mirna_lnc |
| 32842 hsa-mir-15a | AC109992.2 | 0.339987123 mirna_lnc |
| 32843 hsa-mir-15a | AL139089.1 | 0.345661439 mirna_lnc |
| 32844 hsa-mir-15a | AL355388.2 | 0.332509939 mirna_lnc |
| 32845 hsa-mir-15a | AC004080.1 | 0.316429279 mirna_lnc |
| 32846 hsa-mir-15a | AL121832.3 | 0.310888585 mirna_lnc |
| 32847 hsa-mir-15a | AC005831.1 | 0.344785425 mirna_lnc |
| 32848 hsa-mir-15a | AL358473.1 | 0.309481409 mirna_lnc |
| 32849 hsa-mir-15a | AC004943.1 | 0.309193568 mirna_lnc |
| 32850 hsa-mir-15a | LINC01460  | 0.330610808 mirna_lnc |
| 32851 hsa-mir-15a | TRPM2-AS   | 0.338122154 mirna_lnc |
| 32852 hsa-mir-15a | AL390728.6 | 0.357549607 mirna_lnc |
| 32853 hsa-mir-15a | AL109804.1 | 0.416783934 mirna_lnc |
| 32854 hsa-mir-15a | LINC01977  | 0.305304846 mirna_lnc |
| 32855 hsa-mir-15a | AC100791.3 | 0.318688894 mirna_lnc |
| 32856 hsa-mir-15a | AC127024.5 | 0.336928094 mirna_lnc |
| 32857 hsa-mir-15a | AC004943.3 | 0.305851232 mirna_lnc |
| 32858 hsa-mir-15a | DNAJC3-DT  | 0.375290535 mirna_lnc |
| 32859 hsa-mir-15a | AC211476.2 | 0.305804878 mirna_lnc |
| 32860 hsa-mir-15a | AC007128.1 | 0.337314529 mirna_lnc |
| 32861 hsa-mir-15a | AL139082.1 | 0.321317622 mirna_lnc |
| 32862 hsa-mir-15a | AP001065.2 | 0.322695362 mirna_lnc |
| 32863 hsa-mir-15a | ZNF350-AS1 | 0.302689059 mirna_lnc |
| 32864 hsa-mir-15a | AC083900.1 | 0.309400183 mirna_lnc |
| 32865 hsa-mir-15a | AC007485.2 | 0.307808738 mirna_lnc |
| 32866 hsa-mir-15a | LINC02204  | 0.336824752 mirna_lnc |
| 32867 hsa-mir-15a | AC124067.4 | 0.354448797 mirna_lnc |
| 32868 hsa-mir-15a | AL137244.1 | 0.380148554 mirna_lnc |
| 32869 hsa-mir-15a | AC020763.1 | 0.300262632 mirna_lnc |
| 32870 hsa-mir-15a | AC244093.4 | 0.309508034 mirna_lnc |
| 32871 hsa-mir-15a | AL603832.1 | 0.335044101 mirna_lnc |
| 32872 hsa-mir-15a | AC127024.2 | 0.307858576 mirna_lnc |
| 32873 hsa-mir-15a | AL512652.2 | 0.326757159 mirna_lnc |
| 32874 hsa-mir-15a | LBX2-AS1   | 0.300908532 mirna_lnc |
| 32875 hsa-mir-15a | AC006111.2 | 0.323403479 mirna_lnc |
| 32876 hsa-mir-15a | AC009704.2 | 0.317763199 mirna_lnc |
| 32877 hsa-mir-15a | AC064807.4 | 0.326125124 mirna_lnc |
| 32878 hsa-mir-15a | AC025741.1 | 0.328333764 mirna_lnc |
| 32879 hsa-mir-15a | AL133260.2 | 0.334947682 mirna_lnc |
| 32880 hsa-mir-15a | AL583810.1 | 0.300898693 mirna_lnc |
| 32881 hsa-mir-15a | AC130324.1 | 0.301351254 mirna_lnc |
| 32882 hsa-mir-15a | AC019131.1 | 0.315183969 mirna_lnc |
| 32883 hsa-mir-15a | AC116025.2 | 0.371490385 mirna_lnc |
| 32884 hsa-mir-15a | AC093627.7 | 0.329744112 mirna_lnc |
| 32885 hsa-mir-15a | AC080037.1 | 0.313799848 mirna_lnc |

|                    |            |                       |
|--------------------|------------|-----------------------|
| 32886 hsa-mir-15a  | AC147651.2 | 0.330354639 mirna_lnc |
| 32887 hsa-mir-15a  | AC091806.1 | 0.362300612 mirna_lnc |
| 32888 hsa-mir-15a  | AC018648.1 | 0.317651867 mirna_lnc |
| 32889 hsa-mir-15a  | LINC02365  | 0.300272548 mirna_lnc |
| 32890 hsa-mir-15a  | LMF1-AS1   | 0.356219244 mirna_lnc |
| 32891 hsa-mir-15a  | AL035252.3 | 0.360660796 mirna_lnc |
| 32892 hsa-mir-15a  | AC017104.3 | 0.310258873 mirna_lnc |
| 32893 hsa-mir-15a  | LINC00543  | 0.309861741 mirna_lnc |
| 32894 hsa-mir-15a  | AL080312.2 | 0.320432444 mirna_lnc |
| 32895 hsa-mir-15a  | AC004593.1 | 0.333596283 mirna_lnc |
| 32896 hsa-mir-15a  | PSPC1-AS2  | 0.337547822 mirna_lnc |
| 32897 hsa-mir-15a  | AL512652.1 | 0.32551418 mirna_lnc  |
| 32898 hsa-mir-3651 | AC099850.3 | 0.307773743 mirna_lnc |
| 32899 hsa-mir-3651 | AC004988.1 | 0.33273273 mirna_lnc  |
| 32900 hsa-mir-3651 | FER1L6-AS2 | 0.531400481 mirna_lnc |
| 32901 hsa-mir-3651 | AL353746.1 | 0.361100479 mirna_lnc |
| 32902 hsa-mir-3651 | AC090578.2 | 0.315121245 mirna_lnc |
| 32903 hsa-mir-3651 | AC011313.1 | 0.302178969 mirna_lnc |
| 32904 hsa-mir-3651 | TTLL11-IT1 | 0.450923706 mirna_lnc |
| 32905 hsa-mir-3651 | LINC01750  | 0.406389968 mirna_lnc |
| 32906 hsa-mir-3651 | AC109326.1 | 0.379208794 mirna_lnc |
| 32907 hsa-mir-3651 | LINC02594  | 0.677743803 mirna_lnc |
| 32908 hsa-mir-3651 | AC010735.1 | 0.322796307 mirna_lnc |
| 32909 hsa-mir-3651 | AC034223.2 | 0.350908049 mirna_lnc |
| 32910 hsa-mir-3651 | AC010343.3 | 0.416868391 mirna_lnc |
| 32911 hsa-mir-3651 | AC100786.1 | 0.425380507 mirna_lnc |
| 32912 hsa-mir-3651 | AC010735.2 | 0.31028188 mirna_lnc  |
| 32913 hsa-mir-3651 | SENCR      | 0.350643784 mirna_lnc |
| 32914 hsa-let-7c   | AC103746.1 | 0.826361517 mirna_lnc |
| 32915 hsa-let-7c   | AC019294.2 | 0.346206561 mirna_lnc |
| 32916 hsa-let-7c   | AC129492.5 | 0.493717429 mirna_lnc |
| 32917 hsa-let-7c   | LINC02593  | 0.77267814 mirna_lnc  |
| 32918 hsa-let-7c   | AL160286.2 | 0.328833371 mirna_lnc |
| 32919 hsa-let-7c   | AJ006995.1 | 0.435549415 mirna_lnc |
| 32920 hsa-let-7c   | LINC01560  | 0.359135032 mirna_lnc |
| 32921 hsa-let-7c   | PACRG-AS1  | 0.481069777 mirna_lnc |
| 32922 hsa-let-7c   | LINC01625  | 0.84359444 mirna_lnc  |
| 32923 hsa-let-7c   | AC008121.2 | 0.332527431 mirna_lnc |
| 32924 hsa-let-7c   | AC012409.2 | 0.584896443 mirna_lnc |
| 32925 hsa-let-7c   | AC093520.1 | 0.304049583 mirna_lnc |
| 32926 hsa-let-7c   | TNRC6C-AS1 | 0.369245529 mirna_lnc |
| 32927 hsa-let-7c   | LOH12CR2   | 0.434322297 mirna_lnc |
| 32928 hsa-let-7c   | AC016251.2 | 0.400155967 mirna_lnc |
| 32929 hsa-let-7c   | AC008105.1 | 0.366757813 mirna_lnc |
| 32930 hsa-let-7c   | LINC01311  | 0.35127704 mirna_lnc  |
| 32931 hsa-let-7c   | TFAP2A-AS1 | 0.43980011 mirna_lnc  |
| 32932 hsa-let-7c   | AC022387.1 | 0.584287027 mirna_lnc |
| 32933 hsa-let-7c   | AC016737.1 | 0.310831337 mirna_lnc |
| 32934 hsa-let-7c   | AC002066.1 | 0.5098745 mirna_lnc   |
| 32935 hsa-let-7c   | FAM66D     | 0.369433912 mirna_lnc |
| 32936 hsa-let-7c   | AL139288.1 | 0.557945649 mirna_lnc |
| 32937 hsa-let-7c   | AL078581.1 | 0.320733619 mirna_lnc |
| 32938 hsa-let-7c   | MAFA-AS1   | 0.452827267 mirna_lnc |
| 32939 hsa-let-7c   | AC104667.1 | 0.585243673 mirna_lnc |

|                  |             |                        |
|------------------|-------------|------------------------|
| 32940 hsa-let-7c | AC098828. 2 | 0. 393442176 mirna_lnc |
| 32941 hsa-let-7c | AC012377. 1 | 0. 31649538 mirna_lnc  |
| 32942 hsa-let-7c | AP002852. 1 | 0. 352101651 mirna_lnc |
| 32943 hsa-let-7c | AL137802. 2 | 0. 544709101 mirna_lnc |
| 32944 hsa-let-7c | AC004069. 1 | 0. 303897767 mirna_lnc |
| 32945 hsa-let-7c | AC093642. 2 | 0. 708310964 mirna_lnc |
| 32946 hsa-let-7c | AL157823. 2 | 0. 517246917 mirna_lnc |
| 32947 hsa-let-7c | AP000553. 2 | 0. 760677411 mirna_lnc |
| 32948 hsa-let-7c | RHPN1-AS1   | 0. 372772046 mirna_lnc |
| 32949 hsa-let-7c | LINC02175   | 0. 558756769 mirna_lnc |
| 32950 hsa-let-7c | SIX3-AS1    | 0. 347628681 mirna_lnc |
| 32951 hsa-let-7c | AC110813. 1 | 0. 733230514 mirna_lnc |
| 32952 hsa-let-7c | LINC01126   | 0. 40174432 mirna_lnc  |
| 32953 hsa-let-7c | LINC01087   | 0. 625366464 mirna_lnc |
| 32954 hsa-let-7c | AC135803. 1 | 0. 81059329 mirna_lnc  |
| 32955 hsa-let-7c | SYNGAP1-AS1 | 0. 323241723 mirna_lnc |
| 32956 hsa-let-7c | AL391152. 1 | 0. 358796549 mirna_lnc |
| 32957 hsa-let-7c | MAGEA4-AS1  | 0. 443622228 mirna_lnc |
| 32958 hsa-let-7c | AC105339. 5 | 0. 531442807 mirna_lnc |
| 32959 hsa-let-7c | AC090578. 2 | 0. 704799448 mirna_lnc |
| 32960 hsa-let-7c | AC092807. 2 | 0. 325279213 mirna_lnc |
| 32961 hsa-let-7c | EIPR1-IT1   | 0. 307292188 mirna_lnc |
| 32962 hsa-let-7c | AL078605. 1 | 0. 598939333 mirna_lnc |
| 32963 hsa-let-7c | AC026254. 2 | 0. 309436181 mirna_lnc |
| 32964 hsa-let-7c | AL157838. 1 | 0. 351079871 mirna_lnc |
| 32965 hsa-let-7c | AL138760. 1 | 0. 432159728 mirna_lnc |
| 32966 hsa-let-7c | LINC01686   | 0. 350228069 mirna_lnc |
| 32967 hsa-let-7c | Z95115. 1   | 0. 560027851 mirna_lnc |
| 32968 hsa-let-7c | LINC01143   | 0. 571876399 mirna_lnc |
| 32969 hsa-let-7c | AC004884. 2 | 0. 323793607 mirna_lnc |
| 32970 hsa-let-7c | AL606534. 1 | 0. 302412568 mirna_lnc |
| 32971 hsa-let-7c | AC024361. 2 | 0. 302956014 mirna_lnc |
| 32972 hsa-let-7c | AC010271. 2 | 0. 324632371 mirna_lnc |
| 32973 hsa-let-7c | AC079145. 1 | 0. 400816403 mirna_lnc |
| 32974 hsa-let-7c | AC020907. 5 | 0. 58600746 mirna_lnc  |
| 32975 hsa-let-7c | UBR5-AS1    | 0. 385655777 mirna_lnc |
| 32976 hsa-let-7c | AC130650. 2 | 0. 494562245 mirna_lnc |
| 32977 hsa-let-7c | AC129926. 1 | 0. 315618014 mirna_lnc |
| 32978 hsa-let-7c | AL157400. 4 | 0. 318365425 mirna_lnc |
| 32979 hsa-let-7c | AL008721. 2 | 0. 355450414 mirna_lnc |
| 32980 hsa-let-7c | AC110769. 2 | 0. 405953631 mirna_lnc |
| 32981 hsa-let-7c | AL138762. 1 | 0. 399148787 mirna_lnc |
| 32982 hsa-let-7c | AC007996. 1 | 0. 579249486 mirna_lnc |
| 32983 hsa-let-7c | AC096642. 1 | 0. 353801532 mirna_lnc |
| 32984 hsa-let-7c | LINC01521   | 0. 352904455 mirna_lnc |
| 32985 hsa-let-7c | AC005593. 1 | 0. 30002385 mirna_lnc  |
| 32986 hsa-let-7c | AC016708. 1 | 0. 866057105 mirna_lnc |
| 32987 hsa-let-7c | AC091057. 2 | 0. 373272696 mirna_lnc |
| 32988 hsa-let-7c | AC009506. 1 | 0. 541913645 mirna_lnc |
| 32989 hsa-let-7c | AC007848. 1 | 0. 371530378 mirna_lnc |
| 32990 hsa-let-7c | AC099786. 1 | 0. 840450047 mirna_lnc |
| 32991 hsa-let-7c | AC063948. 1 | 0. 371230285 mirna_lnc |
| 32992 hsa-let-7c | AC087742. 1 | 0. 344693295 mirna_lnc |
| 32993 hsa-let-7c | AL354892. 2 | 0. 363126083 mirna_lnc |

|                  |             |                        |
|------------------|-------------|------------------------|
| 32994 hsa-let-7c | AP001330. 5 | 0. 324936326 mirna_lnc |
| 32995 hsa-let-7c | AC011773. 4 | 0. 43881915 mirna_lnc  |
| 32996 hsa-let-7c | AL513365. 2 | 0. 346022407 mirna_lnc |
| 32997 hsa-let-7c | AC016205. 1 | 0. 328999287 mirna_lnc |
| 32998 hsa-let-7c | AC064836. 3 | 0. 301126358 mirna_lnc |
| 32999 hsa-let-7c | BX088651. 4 | 0. 314523176 mirna_lnc |
| 33000 hsa-let-7c | AL512408. 1 | 0. 349845174 mirna_lnc |
| 33001 hsa-let-7c | AC023034. 2 | 0. 502551515 mirna_lnc |
| 33002 hsa-let-7c | AC246793. 1 | 0. 44772809 mirna_lnc  |
| 33003 hsa-let-7c | AC131532. 1 | 0. 41843272 mirna_lnc  |
| 33004 hsa-let-7c | ERICD       | 0. 566376522 mirna_lnc |
| 33005 hsa-let-7c | AL662795. 2 | 0. 43521214 mirna_lnc  |
| 33006 hsa-let-7c | AC006262. 1 | 0. 398298936 mirna_lnc |
| 33007 hsa-let-7c | LINC02600   | 0. 322286044 mirna_lnc |
| 33008 hsa-let-7c | AC092608. 1 | 0. 407292711 mirna_lnc |
| 33009 hsa-let-7c | PCOLCE-AS1  | 0. 344003676 mirna_lnc |
| 33010 hsa-let-7c | Z93930. 3   | 0. 41900056 mirna_lnc  |
| 33011 hsa-let-7c | AL136040. 1 | 0. 420025584 mirna_lnc |
| 33012 hsa-let-7c | AC073389. 1 | 0. 492837328 mirna_lnc |
| 33013 hsa-let-7c | DNM3-IT1    | 0. 776614719 mirna_lnc |
| 33014 hsa-let-7c | AC006206. 1 | 0. 359417506 mirna_lnc |
| 33015 hsa-let-7c | AC090772. 4 | 0. 458026256 mirna_lnc |
| 33016 hsa-let-7c | AL451064. 1 | 0. 80289186 mirna_lnc  |
| 33017 hsa-let-7c | AC084876. 2 | 0. 396873399 mirna_lnc |
| 33018 hsa-let-7c | AL645608. 4 | 0. 698773499 mirna_lnc |
| 33019 hsa-let-7c | AC005730. 2 | 0. 32463595 mirna_lnc  |
| 33020 hsa-let-7c | AC008115. 1 | 0. 366053677 mirna_lnc |
| 33021 hsa-let-7c | AC126407. 1 | 0. 310864327 mirna_lnc |
| 33022 hsa-let-7c | AP001029. 1 | 0. 433670819 mirna_lnc |
| 33023 hsa-let-7c | AC007663. 3 | 0. 662377476 mirna_lnc |
| 33024 hsa-let-7c | AL590787. 1 | 0. 37882591 mirna_lnc  |
| 33025 hsa-let-7c | AC007773. 1 | 0. 329596771 mirna_lnc |
| 33026 hsa-let-7c | AC009120. 5 | 0. 330763227 mirna_lnc |
| 33027 hsa-let-7c | AC093821. 1 | 0. 38534196 mirna_lnc  |
| 33028 hsa-let-7c | AP000253. 1 | 0. 388355967 mirna_lnc |
| 33029 hsa-let-7c | AC034102. 5 | 0. 30527344 mirna_lnc  |
| 33030 hsa-let-7c | AL138831. 1 | 0. 549730768 mirna_lnc |
| 33031 hsa-let-7c | MAP3K2-DT   | 0. 313212374 mirna_lnc |
| 33032 hsa-let-7c | AP001178. 3 | 0. 336334758 mirna_lnc |
| 33033 hsa-let-7c | AC010735. 1 | 0. 675807436 mirna_lnc |
| 33034 hsa-let-7c | AC079600. 3 | 0. 549276146 mirna_lnc |
| 33035 hsa-let-7c | AL022324. 3 | 0. 52957481 mirna_lnc  |
| 33036 hsa-let-7c | AP000320. 1 | 0. 326053564 mirna_lnc |
| 33037 hsa-let-7c | AC105118. 1 | 0. 525667728 mirna_lnc |
| 33038 hsa-let-7c | AC007391. 1 | 0. 401864975 mirna_lnc |
| 33039 hsa-let-7c | AC005005. 3 | 0. 376220097 mirna_lnc |
| 33040 hsa-let-7c | AC100814. 1 | 0. 324833694 mirna_lnc |
| 33041 hsa-let-7c | AL158834. 2 | 0. 320769429 mirna_lnc |
| 33042 hsa-let-7c | UFL1-AS1    | 0. 313359899 mirna_lnc |
| 33043 hsa-let-7c | BX649601. 1 | 0. 324257384 mirna_lnc |
| 33044 hsa-let-7c | AC008736. 2 | 0. 36075861 mirna_lnc  |
| 33045 hsa-let-7c | LINC01771   | 0. 373451496 mirna_lnc |
| 33046 hsa-let-7c | LINC01238   | 0. 550235142 mirna_lnc |
| 33047 hsa-let-7c | ATP2B1-AS1  | 0. 512411623 mirna_lnc |



|                  |             |                        |
|------------------|-------------|------------------------|
| 33048 hsa-let-7c | AP001029. 2 | 0. 413480183 mirna_lnc |
| 33049 hsa-let-7c | AP000255. 1 | 0. 838274726 mirna_lnc |
| 33050 hsa-let-7c | AL132765. 2 | 0. 457644341 mirna_lnc |
| 33051 hsa-let-7c | AC104072. 1 | 0. 624647194 mirna_lnc |
| 33052 hsa-let-7c | CAHM        | 0. 376087799 mirna_lnc |
| 33053 hsa-let-7c | AP005329. 2 | 0. 467360266 mirna_lnc |
| 33054 hsa-let-7c | AC010336. 2 | 0. 402395497 mirna_lnc |
| 33055 hsa-let-7c | AC073389. 2 | 0. 458315712 mirna_lnc |
| 33056 hsa-let-7c | AL031658. 1 | 0. 622713764 mirna_lnc |
| 33057 hsa-let-7c | AC025031. 4 | 0. 300068875 mirna_lnc |
| 33058 hsa-let-7c | AC010997. 4 | 0. 598986739 mirna_lnc |
| 33059 hsa-let-7c | HCG14       | 0. 359143636 mirna_lnc |
| 33060 hsa-let-7c | AC068473. 5 | 0. 35422701 mirna_lnc  |
| 33061 hsa-let-7c | AC010997. 5 | 0. 314120333 mirna_lnc |
| 33062 hsa-let-7c | HM13-AS1    | 0. 393819851 mirna_lnc |
| 33063 hsa-let-7c | AC092849. 1 | 0. 353814723 mirna_lnc |
| 33064 hsa-let-7c | TTC39C-AS1  | 0. 674195284 mirna_lnc |
| 33065 hsa-let-7c | KLHL7-DT    | 0. 327842904 mirna_lnc |
| 33066 hsa-let-7c | AP000962. 1 | 0. 398265286 mirna_lnc |
| 33067 hsa-let-7c | RB1-DT      | 0. 386599445 mirna_lnc |
| 33068 hsa-let-7c | AC023632. 2 | 0. 347879116 mirna_lnc |
| 33069 hsa-let-7c | PAN3-AS1    | 0. 44488617 mirna_lnc  |
| 33070 hsa-let-7c | AL049775. 1 | 0. 303849573 mirna_lnc |
| 33071 hsa-let-7c | AC092447. 5 | 0. 607311096 mirna_lnc |
| 33072 hsa-let-7c | AC006511. 3 | 0. 417198346 mirna_lnc |
| 33073 hsa-let-7c | AC010336. 5 | 0. 71663558 mirna_lnc  |
| 33074 hsa-let-7c | AP000251. 1 | 0. 307887165 mirna_lnc |
| 33075 hsa-let-7c | AC107464. 3 | 0. 65985235 mirna_lnc  |
| 33076 hsa-let-7c | AL136962. 1 | 0. 307161286 mirna_lnc |
| 33077 hsa-let-7c | AC106038. 1 | 0. 300563151 mirna_lnc |
| 33078 hsa-let-7c | AL513534. 2 | 0. 363160027 mirna_lnc |
| 33079 hsa-let-7c | AC025219. 1 | 0. 312337148 mirna_lnc |
| 33080 hsa-let-7c | LINC01901   | 0. 674774463 mirna_lnc |
| 33081 hsa-let-7c | AC022400. 8 | 0. 385900288 mirna_lnc |
| 33082 hsa-let-7c | AC107032. 2 | 0. 392786737 mirna_lnc |
| 33083 hsa-let-7c | LINC01465   | 0. 430541836 mirna_lnc |
| 33084 hsa-let-7c | AC008763. 1 | 0. 31754652 mirna_lnc  |
| 33085 hsa-let-7c | ZNF503-AS2  | 0. 376435198 mirna_lnc |
| 33086 hsa-let-7c | AL158063. 1 | 0. 389015337 mirna_lnc |
| 33087 hsa-let-7c | ERVK9-11    | 0. 365310198 mirna_lnc |
| 33088 hsa-let-7c | AC120057. 4 | 0. 37584782 mirna_lnc  |
| 33089 hsa-let-7c | AL139397. 1 | 0. 3412834 mirna_lnc   |
| 33090 hsa-let-7c | AP000962. 2 | 0. 476397636 mirna_lnc |
| 33091 hsa-let-7c | AL121574. 1 | 0. 35389179 mirna_lnc  |
| 33092 hsa-let-7c | AC026367. 1 | 0. 300281065 mirna_lnc |
| 33093 hsa-let-7c | AL512625. 1 | 0. 374349976 mirna_lnc |
| 33094 hsa-let-7c | LINC01144   | 0. 408527188 mirna_lnc |
| 33095 hsa-let-7c | AL008721. 1 | 0. 383713945 mirna_lnc |
| 33096 hsa-let-7c | AF127577. 5 | 0. 561285199 mirna_lnc |
| 33097 hsa-let-7c | FGF12-AS3   | 0. 486287887 mirna_lnc |
| 33098 hsa-let-7c | AC092119. 2 | 0. 357697558 mirna_lnc |
| 33099 hsa-let-7c | AL355490. 2 | 0. 414057333 mirna_lnc |
| 33100 hsa-let-7c | HCG15       | 0. 324865667 mirna_lnc |
| 33101 hsa-let-7c | AC079610. 1 | 0. 340958458 mirna_lnc |

|                  |             |                       |
|------------------|-------------|-----------------------|
| 33102 hsa-let-7c | SMC2-AS1    | 0.618905414 mirna_lnc |
| 33103 hsa-let-7c | AC110619.1  | 0.386664274 mirna_lnc |
| 33104 hsa-let-7c | AC107068.1  | 0.444102141 mirna_lnc |
| 33105 hsa-let-7c | AC090579.1  | 0.345266666 mirna_lnc |
| 33106 hsa-let-7c | MANEA-DT    | 0.36538995 mirna_lnc  |
| 33107 hsa-let-7c | AL049796.1  | 0.381923669 mirna_lnc |
| 33108 hsa-let-7c | AL136531.1  | 0.380045242 mirna_lnc |
| 33109 hsa-let-7c | AC133550.2  | 0.302236023 mirna_lnc |
| 33110 hsa-let-7c | AL451062.1  | 0.333924867 mirna_lnc |
| 33111 hsa-let-7c | AC092119.3  | 0.311644087 mirna_lnc |
| 33112 hsa-let-7c | MAGEA8-AS1  | 0.694700501 mirna_lnc |
| 33113 hsa-let-7c | AC116348.1  | 0.354564201 mirna_lnc |
| 33114 hsa-let-7c | AC004925.1  | 0.617347162 mirna_lnc |
| 33115 hsa-let-7c | AP001605.1  | 0.326852041 mirna_lnc |
| 33116 hsa-let-7c | Z99129.3    | 0.492947764 mirna_lnc |
| 33117 hsa-let-7c | AC093462.1  | 0.335666989 mirna_lnc |
| 33118 hsa-let-7c | AP000350.5  | 0.674980435 mirna_lnc |
| 33119 hsa-let-7c | AC073389.3  | 0.684212843 mirna_lnc |
| 33120 hsa-let-7c | LINC01970   | 0.346491999 mirna_lnc |
| 33121 hsa-let-7c | AC104794.2  | 0.398020748 mirna_lnc |
| 33122 hsa-let-7c | MAPT-IT1    | 0.660125688 mirna_lnc |
| 33123 hsa-let-7c | AL627171.1  | 0.306769723 mirna_lnc |
| 33124 hsa-let-7c | AP001266.2  | 0.350521133 mirna_lnc |
| 33125 hsa-let-7c | AL451069.1  | 0.434531034 mirna_lnc |
| 33126 hsa-let-7c | AC009312.1  | 0.4315409 mirna_lnc   |
| 33127 hsa-let-7c | AC098484.2  | 0.316390846 mirna_lnc |
| 33128 hsa-let-7c | AC021549.1  | 0.302953409 mirna_lnc |
| 33129 hsa-let-7c | U91328.3    | 0.30735869 mirna_lnc  |
| 33130 hsa-let-7c | AL359510.2  | 0.303871102 mirna_lnc |
| 33131 hsa-let-7c | AP000350.7  | 0.618158931 mirna_lnc |
| 33132 hsa-let-7c | AL096701.3  | 0.344432455 mirna_lnc |
| 33133 hsa-let-7c | AC079414.3  | 0.392964882 mirna_lnc |
| 33134 hsa-let-7c | AC108134.4  | 0.312244485 mirna_lnc |
| 33135 hsa-let-7c | AP002364.1  | 0.3390901 mirna_lnc   |
| 33136 hsa-let-7c | AL645940.1  | 0.30892641 mirna_lnc  |
| 33137 hsa-let-7c | AC020978.1  | 0.333617663 mirna_lnc |
| 33138 hsa-let-7c | AL138831.3  | 0.50993211 mirna_lnc  |
| 33139 hsa-let-7c | AC017100.1  | 0.435793634 mirna_lnc |
| 33140 hsa-let-7c | LINC00471   | 0.307865003 mirna_lnc |
| 33141 hsa-let-7c | C8orf37-AS1 | 0.310668101 mirna_lnc |
| 33142 hsa-let-7c | AC079601.1  | 0.33034465 mirna_lnc  |
| 33143 hsa-let-7c | AL138831.2  | 0.55031339 mirna_lnc  |
| 33144 hsa-let-7c | LINC01447   | 0.397342247 mirna_lnc |
| 33145 hsa-let-7c | LINC00173   | 0.347001046 mirna_lnc |
| 33146 hsa-let-7c | AC005006.1  | 0.416504969 mirna_lnc |
| 33147 hsa-let-7c | AL645608.6  | 0.664193158 mirna_lnc |
| 33148 hsa-let-7c | AL451064.2  | 0.792135022 mirna_lnc |
| 33149 hsa-let-7c | AC231981.1  | 0.306592548 mirna_lnc |
| 33150 hsa-let-7c | AC245060.5  | 0.318677926 mirna_lnc |
| 33151 hsa-let-7c | AL353726.2  | 0.586127009 mirna_lnc |
| 33152 hsa-let-7c | AC009148.1  | 0.336779925 mirna_lnc |
| 33153 hsa-let-7c | SPACA6P-AS  | 0.674186016 mirna_lnc |
| 33154 hsa-let-7c | AC104590.1  | 0.326050206 mirna_lnc |
| 33155 hsa-let-7c | AC090061.1  | 0.523815442 mirna_lnc |

|                      |             |                       |
|----------------------|-------------|-----------------------|
| 33156 hsa-let-7c     | AC055855.2  | 0.335356594 mirna_lnc |
| 33157 hsa-let-7c     | AC104109.2  | 0.405874482 mirna_lnc |
| 33158 hsa-let-7c     | LINC02652   | 0.437762285 mirna_lnc |
| 33159 hsa-let-7c     | AC007497.1  | 0.413239935 mirna_lnc |
| 33160 hsa-let-7c     | AL137003.2  | 0.480543545 mirna_lnc |
| 33161 hsa-let-7c     | L29074.1    | 0.661658913 mirna_lnc |
| 33162 hsa-let-7c     | AC145423.2  | 0.307630649 mirna_lnc |
| 33163 hsa-let-7c     | FAM160A1-DT | 0.410540539 mirna_lnc |
| 33164 hsa-let-7c     | AC140125.2  | 0.347001547 mirna_lnc |
| 33165 hsa-let-7c     | WWC2-AS2    | 0.327493608 mirna_lnc |
| 33166 hsa-let-7c     | AL359541.1  | 0.545599336 mirna_lnc |
| 33167 hsa-let-7c     | AL512791.2  | 0.319214222 mirna_lnc |
| 33168 hsa-let-7c     | CRTC3-AS1   | 0.30372426 mirna_lnc  |
| 33169 hsa-let-7c     | RN7SL832P   | 0.341278282 mirna_lnc |
| 33170 hsa-let-7c     | AL354811.1  | 0.303184405 mirna_lnc |
| 33171 hsa-let-7c     | AL157931.1  | 0.869914373 mirna_lnc |
| 33172 hsa-let-7c     | AL133255.1  | 0.427737543 mirna_lnc |
| 33173 hsa-let-7c     | AL354919.1  | 0.871787711 mirna_lnc |
| 33174 hsa-let-7c     | AC068987.1  | 0.322787778 mirna_lnc |
| 33175 hsa-let-7c     | AC116348.2  | 0.359464031 mirna_lnc |
| 33176 hsa-let-7c     | AL662791.1  | 0.50873382 mirna_lnc  |
| 33177 hsa-let-7c     | AC103996.2  | 0.344368027 mirna_lnc |
| 33178 hsa-let-7c     | AC008555.1  | 0.395822917 mirna_lnc |
| 33179 hsa-let-7c     | AL158211.1  | 0.382081665 mirna_lnc |
| 33180 hsa-let-7c     | AC009084.2  | 0.386656731 mirna_lnc |
| 33181 hsa-let-7c     | AL135791.1  | 0.55947071 mirna_lnc  |
| 33182 hsa-let-7c     | AL161729.4  | 0.365763182 mirna_lnc |
| 33183 hsa-let-7c     | AL022341.2  | 0.433525417 mirna_lnc |
| 33184 hsa-let-7c     | AC009113.1  | 0.366481886 mirna_lnc |
| 33185 hsa-let-7c     | AC083843.2  | 0.417322844 mirna_lnc |
| 33186 hsa-let-7c     | AL645608.2  | 0.686044235 mirna_lnc |
| 33187 hsa-let-7c     | AC010735.2  | 0.587654218 mirna_lnc |
| 33188 hsa-let-7c     | AC079610.2  | 0.328499192 mirna_lnc |
| 33189 hsa-let-7c     | AP001412.1  | 0.32997245 mirna_lnc  |
| 33190 hsa-let-7c     | AL024498.1  | 0.616138642 mirna_lnc |
| 33191 hsa-let-7c     | AC100793.3  | 0.371165102 mirna_lnc |
| 33192 hsa-let-7c     | AC012456.2  | 0.369637451 mirna_lnc |
| 33193 hsa-let-7c     | AC100793.2  | 0.347652705 mirna_lnc |
| 33194 hsa-let-7c     | AC007663.4  | 0.544273674 mirna_lnc |
| 33195 hsa-let-7c     | AC087683.2  | 0.354293354 mirna_lnc |
| 33196 hsa-let-7c     | AL138921.1  | 0.373468537 mirna_lnc |
| 33197 hsa-let-7c     | AP000845.1  | 0.304269071 mirna_lnc |
| 33198 hsa-let-7c     | AC137767.1  | 0.464844217 mirna_lnc |
| 33199 hsa-mir-181b-2 | AL390728.6  | 0.31460436 mirna_lnc  |
| 33200 hsa-mir-181b-2 | AC048341.2  | 0.301821628 mirna_lnc |
| 33201 hsa-mir-181b-2 | AC084782.3  | 0.307000022 mirna_lnc |
| 33202 hsa-mir-181b-2 | LINC00920   | 0.436262756 mirna_lnc |
| 33203 hsa-mir-181b-2 | AC004943.3  | 0.303877591 mirna_lnc |
| 33204 hsa-mir-181b-2 | AL355312.4  | 0.33033359 mirna_lnc  |
| 33205 hsa-mir-181b-2 | AC073316.3  | 0.322825356 mirna_lnc |
| 33206 hsa-mir-181b-2 | AC009269.4  | 0.312573989 mirna_lnc |
| 33207 hsa-mir-181b-2 | AC097504.2  | 0.346205642 mirna_lnc |
| 33208 hsa-mir-181b-2 | AC005034.3  | 0.407045715 mirna_lnc |
| 33209 hsa-mir-24-2   | SNHG3       | 0.329701161 mirna_lnc |

|                    |             |                        |
|--------------------|-------------|------------------------|
| 33210 hsa-mir-24-2 | AC092718. 4 | 0. 362729197 mirna_lnc |
| 33211 hsa-mir-24-2 | AC026401. 3 | 0. 43147167 mirna_lnc  |
| 33212 hsa-mir-24-2 | AC113189. 4 | 0. 35015786 mirna_lnc  |
| 33213 hsa-mir-24-2 | TYMSOS      | 0. 418727472 mirna_lnc |
| 33214 hsa-mir-24-2 | AGAP2-AS1   | 0. 520303719 mirna_lnc |
| 33215 hsa-mir-24-2 | AC099850. 1 | 0. 306788348 mirna_lnc |
| 33216 hsa-mir-24-2 | AL359513. 1 | 0. 305898893 mirna_lnc |
| 33217 hsa-mir-24-2 | AC034213. 1 | 0. 309975743 mirna_lnc |
| 33218 hsa-mir-24-2 | AL049555. 1 | 0. 312188809 mirna_lnc |
| 33219 hsa-mir-24-2 | VPS9D1-AS1  | 0. 435598355 mirna_lnc |
| 33220 hsa-mir-24-2 | AC004241. 3 | 0. 311492725 mirna_lnc |
| 33221 hsa-mir-24-2 | AP001453. 2 | 0. 52368825 mirna_lnc  |
| 33222 hsa-mir-24-2 | JARID2-AS1  | 0. 363074728 mirna_lnc |
| 33223 hsa-mir-24-2 | PYCARD-AS1  | 0. 301540927 mirna_lnc |
| 33224 hsa-mir-24-2 | AC016065. 1 | 0. 38144718 mirna_lnc  |
| 33225 hsa-mir-24-2 | LINC02043   | 0. 38959435 mirna_lnc  |
| 33226 hsa-mir-24-2 | MIR4713HG   | 0. 441987243 mirna_lnc |
| 33227 hsa-mir-24-2 | U62317. 1   | 0. 348246902 mirna_lnc |
| 33228 hsa-mir-24-2 | AL031667. 3 | 0. 305482745 mirna_lnc |
| 33229 hsa-mir-24-2 | TFAP2A-AS1  | 0. 411351347 mirna_lnc |
| 33230 hsa-mir-24-2 | AC004812. 2 | 0. 328000366 mirna_lnc |
| 33231 hsa-mir-24-2 | DEPDC1-AS1  | 0. 365153932 mirna_lnc |
| 33232 hsa-mir-24-2 | AC100791. 2 | 0. 315871373 mirna_lnc |
| 33233 hsa-mir-24-2 | AC117394. 2 | 0. 316740848 mirna_lnc |
| 33234 hsa-mir-24-2 | AC010894. 2 | 0. 312982974 mirna_lnc |
| 33235 hsa-mir-24-2 | AL023803. 3 | 0. 300730802 mirna_lnc |
| 33236 hsa-mir-24-2 | CLEC12A-AS1 | 0. 354025123 mirna_lnc |
| 33237 hsa-mir-24-2 | AC109322. 1 | 0. 329371015 mirna_lnc |
| 33238 hsa-mir-24-2 | AL138724. 1 | 0. 394576004 mirna_lnc |
| 33239 hsa-mir-24-2 | AC108134. 2 | 0. 318039075 mirna_lnc |
| 33240 hsa-mir-24-2 | AL441992. 1 | 0. 37728571 mirna_lnc  |
| 33241 hsa-mir-24-2 | AC016394. 1 | 0. 329188785 mirna_lnc |
| 33242 hsa-mir-24-2 | SNHG19      | 0. 349603453 mirna_lnc |
| 33243 hsa-mir-24-2 | AC090409. 1 | 0. 40394232 mirna_lnc  |
| 33244 hsa-mir-24-2 | AL136162. 1 | 0. 370919973 mirna_lnc |
| 33245 hsa-mir-24-2 | AC015818. 2 | 0. 347917395 mirna_lnc |
| 33246 hsa-mir-24-2 | AC078788. 1 | 0. 325307939 mirna_lnc |
| 33247 hsa-mir-24-2 | AP001453. 4 | 0. 55591745 mirna_lnc  |
| 33248 hsa-mir-24-2 | AC126773. 2 | 0. 386546689 mirna_lnc |
| 33249 hsa-mir-24-2 | MAN1B1-DT   | 0. 331429011 mirna_lnc |
| 33250 hsa-mir-24-2 | AC012640. 2 | 0. 405732574 mirna_lnc |
| 33251 hsa-mir-24-2 | AC090970. 2 | 0. 45263992 mirna_lnc  |
| 33252 hsa-mir-24-2 | AC026782. 2 | 0. 368332661 mirna_lnc |
| 33253 hsa-mir-24-2 | AP003119. 2 | 0. 410000206 mirna_lnc |
| 33254 hsa-mir-24-2 | MAPK6-DT    | 0. 333635068 mirna_lnc |
| 33255 hsa-mir-24-2 | AC007540. 1 | 0. 315353141 mirna_lnc |
| 33256 hsa-mir-24-2 | AP003390. 1 | 0. 410134048 mirna_lnc |
| 33257 hsa-mir-24-2 | AC114956. 2 | 0. 46110969 mirna_lnc  |
| 33258 hsa-mir-24-2 | AC025244. 1 | 0. 378209942 mirna_lnc |
| 33259 hsa-mir-24-2 | AC002470. 1 | 0. 399117103 mirna_lnc |
| 33260 hsa-mir-24-2 | HAGLROS     | 0. 338974469 mirna_lnc |
| 33261 hsa-mir-24-2 | AL353764. 1 | 0. 319875746 mirna_lnc |
| 33262 hsa-mir-24-2 | AC040169. 1 | 0. 396574362 mirna_lnc |
| 33263 hsa-mir-24-2 | AL078644. 2 | 0. 363137708 mirna_lnc |

|                    |             |                       |
|--------------------|-------------|-----------------------|
| 33264 hsa-mir-24-2 | HOMER3-AS1  | 0.362870626 mirna_lnc |
| 33265 hsa-mir-24-2 | AC010168.1  | 0.396074229 mirna_lnc |
| 33266 hsa-mir-24-2 | AC016876.3  | 0.356525145 mirna_lnc |
| 33267 hsa-mir-24-2 | AL031665.2  | 0.322346369 mirna_lnc |
| 33268 hsa-mir-24-2 | TM4SF19-AS1 | 0.383644515 mirna_lnc |
| 33269 hsa-mir-24-2 | AL359643.3  | 0.371835629 mirna_lnc |
| 33270 hsa-mir-24-2 | AC020891.3  | 0.304803647 mirna_lnc |
| 33271 hsa-mir-24-2 | AL031058.1  | 0.392053778 mirna_lnc |
| 33272 hsa-mir-24-2 | AC019205.1  | 0.347530456 mirna_lnc |
| 33273 hsa-mir-24-2 | AC016876.1  | 0.313304065 mirna_lnc |
| 33274 hsa-mir-24-2 | AC024581.1  | 0.428987903 mirna_lnc |
| 33275 hsa-mir-24-2 | AC002401.4  | 0.336698723 mirna_lnc |
| 33276 hsa-mir-24-2 | AC092070.4  | 0.388431126 mirna_lnc |
| 33277 hsa-mir-24-2 | LINC00656   | 0.314459583 mirna_lnc |
| 33278 hsa-mir-24-2 | AC022075.1  | 0.322945889 mirna_lnc |
| 33279 hsa-mir-24-2 | AL138789.1  | 0.36425549 mirna_lnc  |
| 33280 hsa-mir-24-2 | AC020891.2  | 0.302886848 mirna_lnc |
| 33281 hsa-mir-24-2 | AC239799.1  | 0.31704877 mirna_lnc  |
| 33282 hsa-mir-24-2 | DLX2-DT     | 0.33140938 mirna_lnc  |
| 33283 hsa-mir-24-2 | AC113194.1  | 0.317146864 mirna_lnc |
| 33284 hsa-mir-24-2 | AL136131.2  | 0.304522566 mirna_lnc |
| 33285 hsa-mir-24-2 | EXOC3-AS1   | 0.49062977 mirna_lnc  |
| 33286 hsa-mir-24-2 | TTLL11-IT1  | 0.309083135 mirna_lnc |
| 33287 hsa-mir-24-2 | AC010595.1  | 0.401093503 mirna_lnc |
| 33288 hsa-mir-24-2 | AP001160.3  | 0.379757792 mirna_lnc |
| 33289 hsa-mir-24-2 | LINC01932   | 0.316476988 mirna_lnc |
| 33290 hsa-mir-24-2 | AC010327.3  | 0.322850304 mirna_lnc |
| 33291 hsa-mir-24-2 | AC008556.1  | 0.49066558 mirna_lnc  |
| 33292 hsa-mir-24-2 | SMCR2       | 0.308352552 mirna_lnc |
| 33293 hsa-mir-24-2 | LINC01816   | 0.367827366 mirna_lnc |
| 33294 hsa-mir-24-2 | AC099518.6  | 0.313222438 mirna_lnc |
| 33295 hsa-mir-24-2 | AC007881.3  | 0.340754882 mirna_lnc |
| 33296 hsa-mir-24-2 | LINC02533   | 0.377785457 mirna_lnc |
| 33297 hsa-mir-24-2 | AC069503.1  | 0.325479093 mirna_lnc |
| 33298 hsa-mir-24-2 | AC011445.2  | 0.312540672 mirna_lnc |
| 33299 hsa-mir-24-2 | DCST1-AS1   | 0.323181715 mirna_lnc |
| 33300 hsa-mir-24-2 | AC009118.2  | 0.375864962 mirna_lnc |
| 33301 hsa-mir-24-2 | AC046143.2  | 0.329593293 mirna_lnc |
| 33302 hsa-mir-24-2 | AL121992.2  | 0.326076959 mirna_lnc |
| 33303 hsa-mir-24-2 | AC055736.1  | 0.355108565 mirna_lnc |
| 33304 hsa-mir-24-2 | AC004846.1  | 0.301723429 mirna_lnc |
| 33305 hsa-mir-24-2 | AC009902.2  | 0.335741417 mirna_lnc |
| 33306 hsa-mir-24-2 | AC082651.3  | 0.487683431 mirna_lnc |
| 33307 hsa-mir-24-2 | AL451085.2  | 0.350707954 mirna_lnc |
| 33308 hsa-mir-24-2 | DGUOK-AS1   | 0.521423095 mirna_lnc |
| 33309 hsa-mir-24-2 | AP005436.2  | 0.363764196 mirna_lnc |
| 33310 hsa-mir-24-2 | AC026495.1  | 0.309584758 mirna_lnc |
| 33311 hsa-mir-24-2 | AL139327.2  | 0.359238651 mirna_lnc |
| 33312 hsa-mir-24-2 | LINC02178   | 0.337999014 mirna_lnc |
| 33313 hsa-mir-24-2 | AL157904.1  | 0.363849903 mirna_lnc |
| 33314 hsa-mir-24-2 | AC087741.2  | 0.376137038 mirna_lnc |
| 33315 hsa-mir-24-2 | AL353719.1  | 0.425886379 mirna_lnc |
| 33316 hsa-mir-24-2 | AC010275.1  | 0.388115236 mirna_lnc |
| 33317 hsa-mir-24-2 | AC091170.1  | 0.381310199 mirna_lnc |

|                    |            |                       |
|--------------------|------------|-----------------------|
| 33318 hsa-mir-24-2 | LINC01063  | 0.38268713 mirna_lnc  |
| 33319 hsa-mir-24-2 | AC114956.1 | 0.304537065 mirna_lnc |
| 33320 hsa-mir-24-2 | CIRBP-AS1  | 0.37829328 mirna_lnc  |
| 33321 hsa-mir-24-2 | BX322234.1 | 0.337517672 mirna_lnc |
| 33322 hsa-mir-24-2 | AC109454.3 | 0.305654529 mirna_lnc |
| 33323 hsa-mir-24-2 | AC040169.3 | 0.319780659 mirna_lnc |
| 33324 hsa-mir-24-2 | AL358334.2 | 0.520456348 mirna_lnc |
| 33325 hsa-mir-24-2 | AC009171.2 | 0.43005741 mirna_lnc  |
| 33326 hsa-mir-24-2 | AC025183.1 | 0.509746359 mirna_lnc |
| 33327 hsa-mir-24-2 | AC068831.6 | 0.552837152 mirna_lnc |
| 33328 hsa-mir-24-2 | LINC01023  | 0.328862775 mirna_lnc |
| 33329 hsa-mir-24-2 | AC138696.2 | 0.411550595 mirna_lnc |
| 33330 hsa-mir-24-2 | PICART1    | 0.302554226 mirna_lnc |
| 33331 hsa-mir-24-2 | AC023906.2 | 0.452272351 mirna_lnc |
| 33332 hsa-mir-24-2 | MAST4-AS1  | 0.415152725 mirna_lnc |
| 33333 hsa-mir-24-2 | AC004471.1 | 0.330444393 mirna_lnc |
| 33334 hsa-mir-24-2 | AC018716.2 | 0.305457764 mirna_lnc |
| 33335 hsa-mir-24-2 | LINC01807  | 0.382257705 mirna_lnc |
| 33336 hsa-mir-24-2 | AC114489.1 | 0.341403359 mirna_lnc |
| 33337 hsa-mir-24-2 | LINC01564  | 0.317621534 mirna_lnc |
| 33338 hsa-mir-24-2 | COA6-AS1   | 0.368073535 mirna_lnc |
| 33339 hsa-mir-24-2 | AC008267.5 | 0.308893012 mirna_lnc |
| 33340 hsa-mir-24-2 | AC099487.1 | 0.337924713 mirna_lnc |
| 33341 hsa-mir-24-2 | LINC00885  | 0.342365342 mirna_lnc |
| 33342 hsa-mir-24-2 | LINC01971  | 0.319846538 mirna_lnc |
| 33343 hsa-mir-24-2 | IL20RB-AS1 | 0.338145058 mirna_lnc |
| 33344 hsa-mir-24-2 | AC108865.1 | 0.424842079 mirna_lnc |
| 33345 hsa-mir-24-2 | LINC01998  | 0.304661252 mirna_lnc |
| 33346 hsa-mir-24-2 | URB1-AS1   | 0.352640278 mirna_lnc |
| 33347 hsa-mir-24-2 | AC096536.2 | 0.356555261 mirna_lnc |
| 33348 hsa-mir-24-2 | AC132938.3 | 0.329835539 mirna_lnc |
| 33349 hsa-mir-24-2 | AP001790.1 | 0.320467707 mirna_lnc |
| 33350 hsa-mir-24-2 | AL138902.1 | 0.310027424 mirna_lnc |
| 33351 hsa-mir-24-2 | AC026304.1 | 0.397118543 mirna_lnc |
| 33352 hsa-mir-24-2 | AC034206.1 | 0.338672297 mirna_lnc |
| 33353 hsa-mir-24-2 | AC131009.1 | 0.387789802 mirna_lnc |
| 33354 hsa-mir-24-2 | ELDR       | 0.368205202 mirna_lnc |
| 33355 hsa-mir-24-2 | AC131157.1 | 0.407203837 mirna_lnc |
| 33356 hsa-mir-24-2 | DOCK9-DT   | 0.400818518 mirna_lnc |
| 33357 hsa-mir-24-2 | AL355312.3 | 0.403514779 mirna_lnc |
| 33358 hsa-mir-24-2 | AL359091.5 | 0.368015651 mirna_lnc |
| 33359 hsa-mir-24-2 | AC093677.2 | 0.317317087 mirna_lnc |
| 33360 hsa-mir-24-2 | AC018695.2 | 0.34184813 mirna_lnc  |
| 33361 hsa-mir-24-2 | AL122125.1 | 0.312507413 mirna_lnc |
| 33362 hsa-mir-24-2 | AP002957.1 | 0.346521942 mirna_lnc |
| 33363 hsa-mir-24-2 | AC083880.1 | 0.343875043 mirna_lnc |
| 33364 hsa-mir-24-2 | AC091182.2 | 0.333886225 mirna_lnc |
| 33365 hsa-mir-24-2 | LINC01527  | 0.312552309 mirna_lnc |
| 33366 hsa-mir-24-2 | LINC00519  | 0.315921013 mirna_lnc |
| 33367 hsa-mir-24-2 | AC008443.4 | 0.317365592 mirna_lnc |
| 33368 hsa-mir-24-2 | AL034399.2 | 0.453960302 mirna_lnc |
| 33369 hsa-mir-24-2 | AP001547.1 | 0.304745556 mirna_lnc |
| 33370 hsa-mir-24-2 | AC068870.2 | 0.307624091 mirna_lnc |
| 33371 hsa-mir-24-2 | AC108865.2 | 0.333587521 mirna_lnc |

|                    |             |                        |
|--------------------|-------------|------------------------|
| 33372 hsa-mir-24-2 | AC010834. 2 | 0. 322175396 mirna_lnc |
| 33373 hsa-mir-24-2 | AL022341. 1 | 0. 439824195 mirna_lnc |
| 33374 hsa-mir-24-2 | AP000251. 1 | 0. 406784743 mirna_lnc |
| 33375 hsa-mir-24-2 | AC092115. 3 | 0. 385231804 mirna_lnc |
| 33376 hsa-mir-24-2 | AC025575. 2 | 0. 440471141 mirna_lnc |
| 33377 hsa-mir-24-2 | MIR210HG    | 0. 395855752 mirna_lnc |
| 33378 hsa-mir-24-2 | AC112236. 1 | 0. 367361661 mirna_lnc |
| 33379 hsa-mir-24-2 | AC093635. 1 | 0. 366286296 mirna_lnc |
| 33380 hsa-mir-24-2 | LINC01715   | 0. 330842313 mirna_lnc |
| 33381 hsa-mir-24-2 | ZNF503-AS2  | 0. 309716248 mirna_lnc |
| 33382 hsa-mir-24-2 | CFAP58-DT   | 0. 32666135 mirna_lnc  |
| 33383 hsa-mir-24-2 | AC011374. 1 | 0. 307931183 mirna_lnc |
| 33384 hsa-mir-24-2 | MIR31HG     | 0. 354732765 mirna_lnc |
| 33385 hsa-mir-24-2 | PITPNA-AS1  | 0. 346610366 mirna_lnc |
| 33386 hsa-mir-24-2 | AC027644. 3 | 0. 333027428 mirna_lnc |
| 33387 hsa-mir-24-2 | AC016888. 1 | 0. 305689264 mirna_lnc |
| 33388 hsa-mir-24-2 | AC138207. 7 | 0. 34060401 mirna_lnc  |
| 33389 hsa-mir-24-2 | AP000692. 2 | 0. 365552625 mirna_lnc |
| 33390 hsa-mir-24-2 | AC084032. 1 | 0. 311471386 mirna_lnc |
| 33391 hsa-mir-24-2 | AC139100. 1 | 0. 423987956 mirna_lnc |
| 33392 hsa-mir-24-2 | AC069307. 1 | 0. 301397639 mirna_lnc |
| 33393 hsa-mir-24-2 | AC079834. 2 | 0. 383488055 mirna_lnc |
| 33394 hsa-mir-24-2 | AL583808. 1 | 0. 422462226 mirna_lnc |
| 33395 hsa-mir-24-2 | AC068338. 2 | 0. 309355558 mirna_lnc |
| 33396 hsa-mir-24-2 | AL358852. 1 | 0. 300278533 mirna_lnc |
| 33397 hsa-mir-24-2 | AC079465. 1 | 0. 398873669 mirna_lnc |
| 33398 hsa-mir-24-2 | AC130343. 2 | 0. 311323678 mirna_lnc |
| 33399 hsa-mir-24-2 | AC124068. 2 | 0. 338606617 mirna_lnc |
| 33400 hsa-mir-24-2 | AC145423. 2 | 0. 364056543 mirna_lnc |
| 33401 hsa-mir-24-2 | AP002800. 1 | 0. 37883759 mirna_lnc  |
| 33402 hsa-mir-24-2 | AL391244. 1 | 0. 312105304 mirna_lnc |
| 33403 hsa-mir-24-2 | AC004471. 2 | 0. 332338658 mirna_lnc |
| 33404 hsa-mir-24-2 | AC126768. 2 | 0. 327541549 mirna_lnc |
| 33405 hsa-mir-24-2 | AL121672. 3 | 0. 423016476 mirna_lnc |
| 33406 hsa-mir-24-2 | FOXN3-AS1   | 0. 423113828 mirna_lnc |
| 33407 hsa-mir-24-2 | ADIRF-AS1   | 0. 473410105 mirna_lnc |
| 33408 hsa-mir-24-2 | AC018695. 6 | 0. 448044962 mirna_lnc |
| 33409 hsa-mir-24-2 | AC104031. 1 | 0. 442416404 mirna_lnc |
| 33410 hsa-mir-24-2 | AL445483. 1 | 0. 372691326 mirna_lnc |
| 33411 hsa-mir-188  | SNHG3       | 0. 307127598 mirna_lnc |
| 33412 hsa-mir-188  | AC106876. 1 | 0. 303900696 mirna_lnc |
| 33413 hsa-mir-188  | AL035461. 2 | 0. 30035312 mirna_lnc  |
| 33414 hsa-mir-188  | AC027228. 2 | 0. 34620461 mirna_lnc  |
| 33415 hsa-mir-188  | LINC02585   | 0. 339780716 mirna_lnc |
| 33416 hsa-mir-188  | HNF4A-AS1   | 0. 340405465 mirna_lnc |
| 33417 hsa-mir-188  | AC131009. 3 | 0. 315029663 mirna_lnc |
| 33418 hsa-mir-188  | AL451050. 2 | 0. 328817512 mirna_lnc |
| 33419 hsa-mir-188  | AC104472. 1 | 0. 302744647 mirna_lnc |
| 33420 hsa-mir-188  | AC009407. 1 | 0. 310748923 mirna_lnc |
| 33421 hsa-mir-188  | AC004080. 2 | 0. 32407923 mirna_lnc  |
| 33422 hsa-mir-188  | HOXC-AS3    | 0. 351927323 mirna_lnc |
| 33423 hsa-mir-188  | AC007009. 1 | 0. 348823083 mirna_lnc |
| 33424 hsa-mir-188  | AL121578. 3 | 0. 308811315 mirna_lnc |
| 33425 hsa-mir-188  | AC067930. 5 | 0. 320171245 mirna_lnc |

|                     |             |                       |
|---------------------|-------------|-----------------------|
| 33426 hsa-mir-188   | LINC01357   | 0.332602758 mirna_lnc |
| 33427 hsa-mir-188   | TRPM2-AS    | 0.324231234 mirna_lnc |
| 33428 hsa-mir-188   | AP000866.5  | 0.325332436 mirna_lnc |
| 33429 hsa-mir-188   | AC023302.1  | 0.305872546 mirna_lnc |
| 33430 hsa-mir-188   | AL117382.1  | 0.397674798 mirna_lnc |
| 33431 hsa-mir-188   | DDX39B-AS1  | 0.301651165 mirna_lnc |
| 33432 hsa-mir-188   | AP003680.1  | 0.318190996 mirna_lnc |
| 33433 hsa-mir-188   | LINC00628   | 0.38108572 mirna_lnc  |
| 33434 hsa-mir-188   | AL390961.2  | 0.323234258 mirna_lnc |
| 33435 hsa-mir-188   | SNHG18      | 0.336038691 mirna_lnc |
| 33436 hsa-mir-188   | AP003733.4  | 0.338867761 mirna_lnc |
| 33437 hsa-mir-188   | AC113143.1  | 0.303018127 mirna_lnc |
| 33438 hsa-mir-188   | KBTBD11-OT1 | 0.308877215 mirna_lnc |
| 33439 hsa-mir-188   | AL591848.2  | 0.34731798 mirna_lnc  |
| 33440 hsa-mir-188   | AC006205.2  | 0.35102652 mirna_lnc  |
| 33441 hsa-mir-188   | AC022762.2  | 0.302138549 mirna_lnc |
| 33442 hsa-mir-188   | LINC01389   | 0.330665297 mirna_lnc |
| 33443 hsa-mir-188   | AC092756.1  | 0.347453472 mirna_lnc |
| 33444 hsa-mir-188   | AP006621.5  | 0.30065056 mirna_lnc  |
| 33445 hsa-mir-188   | LBX2-AS1    | 0.330816893 mirna_lnc |
| 33446 hsa-mir-188   | AC079915.1  | 0.32091897 mirna_lnc  |
| 33447 hsa-mir-188   | AC124798.1  | 0.460012194 mirna_lnc |
| 33448 hsa-mir-188   | AC116025.2  | 0.313619649 mirna_lnc |
| 33449 hsa-mir-188   | AL137798.1  | 0.333708013 mirna_lnc |
| 33450 hsa-mir-188   | AL121992.3  | 0.313172768 mirna_lnc |
| 33451 hsa-mir-188   | AC091117.2  | 0.316602763 mirna_lnc |
| 33452 hsa-mir-188   | AC010503.4  | 0.344678182 mirna_lnc |
| 33453 hsa-mir-188   | AL121989.1  | 0.344899221 mirna_lnc |
| 33454 hsa-mir-188   | LINC01979   | 0.317756788 mirna_lnc |
| 33455 hsa-mir-188   | AL591178.1  | 0.339516035 mirna_lnc |
| 33456 hsa-mir-188   | LINC00543   | 0.393973052 mirna_lnc |
| 33457 hsa-mir-188   | AC005696.4  | 0.305648425 mirna_lnc |
| 33458 hsa-mir-188   | AC016292.1  | 0.338080136 mirna_lnc |
| 33459 hsa-mir-92a-2 | AC012073.1  | 0.399695032 mirna_lnc |
| 33460 hsa-mir-92a-2 | AC010761.2  | 0.306976143 mirna_lnc |
| 33461 hsa-mir-92a-2 | AC020658.4  | 0.304830372 mirna_lnc |
| 33462 hsa-mir-92a-2 | AL035461.2  | 0.305244598 mirna_lnc |
| 33463 hsa-mir-92a-2 | AL138759.1  | 0.340220892 mirna_lnc |
| 33464 hsa-mir-92a-2 | DDX11-AS1   | 0.330825392 mirna_lnc |
| 33465 hsa-mir-92a-2 | AL117332.1  | 0.303391524 mirna_lnc |
| 33466 hsa-mir-92a-2 | AL161891.1  | 0.510551617 mirna_lnc |
| 33467 hsa-mir-92a-2 | AC092614.1  | 0.360375691 mirna_lnc |
| 33468 hsa-mir-92a-2 | AL157932.1  | 0.336439901 mirna_lnc |
| 33469 hsa-mir-92a-2 | HOXC-AS2    | 0.376420612 mirna_lnc |
| 33470 hsa-mir-92a-2 | AC019069.1  | 0.342077615 mirna_lnc |
| 33471 hsa-mir-92a-2 | AC074117.1  | 0.311919321 mirna_lnc |
| 33472 hsa-mir-92a-2 | AP001469.3  | 0.325490665 mirna_lnc |
| 33473 hsa-mir-92a-2 | AC004943.2  | 0.315354662 mirna_lnc |
| 33474 hsa-mir-92a-2 | AC027627.1  | 0.329828359 mirna_lnc |
| 33475 hsa-mir-92a-2 | AC021945.1  | 0.365288129 mirna_lnc |
| 33476 hsa-mir-92a-2 | AC090844.3  | 0.322275937 mirna_lnc |
| 33477 hsa-mir-92a-2 | AC090159.1  | 0.323173072 mirna_lnc |
| 33478 hsa-mir-92a-2 | AC009121.1  | 0.306192154 mirna_lnc |
| 33479 hsa-mir-92a-2 | AC024940.6  | 0.341558282 mirna_lnc |



|                     |             |                       |
|---------------------|-------------|-----------------------|
| 33480 hsa-mir-92a-2 | AC016723.1  | 0.30404878 mirna_lnc  |
| 33481 hsa-mir-92a-2 | GCC2-AS1    | 0.335765857 mirna_lnc |
| 33482 hsa-mir-92a-2 | AC015849.5  | 0.302205584 mirna_lnc |
| 33483 hsa-mir-92a-2 | LINC01096   | 0.316363486 mirna_lnc |
| 33484 hsa-mir-92a-2 | AC024267.6  | 0.331618898 mirna_lnc |
| 33485 hsa-mir-92a-2 | AL139089.1  | 0.301521917 mirna_lnc |
| 33486 hsa-mir-92a-2 | AL161772.1  | 0.370642885 mirna_lnc |
| 33487 hsa-mir-92a-2 | AC004080.1  | 0.308033309 mirna_lnc |
| 33488 hsa-mir-92a-2 | AC024230.1  | 0.313681977 mirna_lnc |
| 33489 hsa-mir-92a-2 | AC138904.1  | 0.354338762 mirna_lnc |
| 33490 hsa-mir-92a-2 | LINC01460   | 0.434608797 mirna_lnc |
| 33491 hsa-mir-92a-2 | AC018878.1  | 0.307703246 mirna_lnc |
| 33492 hsa-mir-92a-2 | TRPM2-AS    | 0.303701478 mirna_lnc |
| 33493 hsa-mir-92a-2 | SREBF2-AS1  | 0.320942601 mirna_lnc |
| 33494 hsa-mir-92a-2 | DNAJC3-DT   | 0.308657394 mirna_lnc |
| 33495 hsa-mir-92a-2 | AC106820.2  | 0.337306755 mirna_lnc |
| 33496 hsa-mir-92a-2 | AC026271.3  | 0.427291901 mirna_lnc |
| 33497 hsa-mir-92a-2 | AC016205.1  | 0.359459277 mirna_lnc |
| 33498 hsa-mir-92a-2 | PIK3CD-AS2  | 0.370028268 mirna_lnc |
| 33499 hsa-mir-92a-2 | MYB-AS1     | 0.321776513 mirna_lnc |
| 33500 hsa-mir-92a-2 | AP003680.1  | 0.310603116 mirna_lnc |
| 33501 hsa-mir-92a-2 | AC007128.1  | 0.337436938 mirna_lnc |
| 33502 hsa-mir-92a-2 | RNASEH1-AS1 | 0.410219131 mirna_lnc |
| 33503 hsa-mir-92a-2 | AC092669.1  | 0.305509012 mirna_lnc |
| 33504 hsa-mir-92a-2 | AC005224.1  | 0.303555092 mirna_lnc |
| 33505 hsa-mir-92a-2 | AC011773.1  | 0.331819916 mirna_lnc |
| 33506 hsa-mir-92a-2 | AL442128.2  | 0.356701772 mirna_lnc |
| 33507 hsa-mir-92a-2 | AC145207.5  | 0.345911124 mirna_lnc |
| 33508 hsa-mir-92a-2 | AC007938.3  | 0.386952765 mirna_lnc |
| 33509 hsa-mir-92a-2 | AC009271.1  | 0.307694392 mirna_lnc |
| 33510 hsa-mir-92a-2 | AC098818.2  | 0.309517674 mirna_lnc |
| 33511 hsa-mir-92a-2 | AL137244.1  | 0.34867177 mirna_lnc  |
| 33512 hsa-mir-92a-2 | HHIP-AS1    | 0.333209885 mirna_lnc |
| 33513 hsa-mir-92a-2 | AL512652.2  | 0.358294502 mirna_lnc |
| 33514 hsa-mir-92a-2 | AL138688.2  | 0.309759958 mirna_lnc |
| 33515 hsa-mir-92a-2 | AC117395.1  | 0.318570665 mirna_lnc |
| 33516 hsa-mir-92a-2 | AL161452.1  | 0.310400611 mirna_lnc |
| 33517 hsa-mir-92a-2 | MCF2L-AS1   | 0.415993495 mirna_lnc |
| 33518 hsa-mir-92a-2 | AL138767.3  | 0.326763291 mirna_lnc |
| 33519 hsa-mir-92a-2 | AC098936.1  | 0.335452664 mirna_lnc |
| 33520 hsa-mir-92a-2 | AC138207.2  | 0.329767667 mirna_lnc |
| 33521 hsa-mir-92a-2 | AC147651.2  | 0.314395342 mirna_lnc |
| 33522 hsa-mir-92a-2 | ZNF649-AS1  | 0.31727396 mirna_lnc  |
| 33523 hsa-mir-92a-2 | AL118511.1  | 0.322888039 mirna_lnc |
| 33524 hsa-mir-92a-2 | LINC02470   | 0.312374492 mirna_lnc |
| 33525 hsa-mir-92a-2 | AC106820.4  | 0.392376484 mirna_lnc |
| 33526 hsa-mir-92a-2 | AC004076.2  | 0.302570034 mirna_lnc |
| 33527 hsa-mir-92a-2 | AC017104.3  | 0.301952515 mirna_lnc |
| 33528 hsa-mir-92a-2 | LINC00909   | 0.325162479 mirna_lnc |
| 33529 hsa-mir-92a-2 | AC007497.1  | 0.307363927 mirna_lnc |
| 33530 hsa-mir-92a-2 | AL161729.4  | 0.326983421 mirna_lnc |
| 33531 hsa-mir-92a-2 | AC012486.1  | 0.322516877 mirna_lnc |
| 33532 hsa-mir-92a-2 | AL132655.1  | 0.304119524 mirna_lnc |
| 33533 hsa-mir-92a-2 | AL136146.2  | 0.305987054 mirna_lnc |

|                    |             |                       |
|--------------------|-------------|-----------------------|
| 33534 hsa-mir-16-1 | AC026401.3  | 0.319701916 mirna_lnc |
| 33535 hsa-mir-16-1 | AC012073.1  | 0.363388579 mirna_lnc |
| 33536 hsa-mir-16-1 | MELTF-AS1   | 0.351292499 mirna_lnc |
| 33537 hsa-mir-16-1 | TMPO-AS1    | 0.418484294 mirna_lnc |
| 33538 hsa-mir-16-1 | AC020658.4  | 0.429836356 mirna_lnc |
| 33539 hsa-mir-16-1 | AP000808.1  | 0.346794928 mirna_lnc |
| 33540 hsa-mir-16-1 | AL035461.2  | 0.381258629 mirna_lnc |
| 33541 hsa-mir-16-1 | DDX11-AS1   | 0.316438593 mirna_lnc |
| 33542 hsa-mir-16-1 | AL117332.1  | 0.363645462 mirna_lnc |
| 33543 hsa-mir-16-1 | AC092614.1  | 0.370144293 mirna_lnc |
| 33544 hsa-mir-16-1 | HOXC-AS2    | 0.357032925 mirna_lnc |
| 33545 hsa-mir-16-1 | AC004943.2  | 0.347612068 mirna_lnc |
| 33546 hsa-mir-16-1 | AC009121.2  | 0.318141801 mirna_lnc |
| 33547 hsa-mir-16-1 | AL023803.3  | 0.311246036 mirna_lnc |
| 33548 hsa-mir-16-1 | AC147651.4  | 0.362699311 mirna_lnc |
| 33549 hsa-mir-16-1 | LINC01952   | 0.304464382 mirna_lnc |
| 33550 hsa-mir-16-1 | AC074351.1  | 0.310075599 mirna_lnc |
| 33551 hsa-mir-16-1 | LINC02367   | 0.310132386 mirna_lnc |
| 33552 hsa-mir-16-1 | AC008750.7  | 0.319632392 mirna_lnc |
| 33553 hsa-mir-16-1 | AL391069.2  | 0.376374374 mirna_lnc |
| 33554 hsa-mir-16-1 | AC116049.2  | 0.335022744 mirna_lnc |
| 33555 hsa-mir-16-1 | AL513497.1  | 0.325192317 mirna_lnc |
| 33556 hsa-mir-16-1 | AC024230.1  | 0.362876934 mirna_lnc |
| 33557 hsa-mir-16-1 | LINC01397   | 0.322240355 mirna_lnc |
| 33558 hsa-mir-16-1 | AP000487.1  | 0.424899394 mirna_lnc |
| 33559 hsa-mir-16-1 | AL031665.2  | 0.304505576 mirna_lnc |
| 33560 hsa-mir-16-1 | AC104971.1  | 0.400144315 mirna_lnc |
| 33561 hsa-mir-16-1 | AC010999.2  | 0.326944022 mirna_lnc |
| 33562 hsa-mir-16-1 | AP001025.1  | 0.423634678 mirna_lnc |
| 33563 hsa-mir-16-1 | SREBF2-AS1  | 0.301787245 mirna_lnc |
| 33564 hsa-mir-16-1 | AC100812.1  | 0.302036143 mirna_lnc |
| 33565 hsa-mir-16-1 | AC011297.1  | 0.356612808 mirna_lnc |
| 33566 hsa-mir-16-1 | AC004943.3  | 0.352969168 mirna_lnc |
| 33567 hsa-mir-16-1 | AC091153.3  | 0.311910341 mirna_lnc |
| 33568 hsa-mir-16-1 | AL354892.2  | 0.412221342 mirna_lnc |
| 33569 hsa-mir-16-1 | AC106820.2  | 0.371614403 mirna_lnc |
| 33570 hsa-mir-16-1 | AC026271.3  | 0.314422768 mirna_lnc |
| 33571 hsa-mir-16-1 | AC016205.1  | 0.359841104 mirna_lnc |
| 33572 hsa-mir-16-1 | RNASEH1-AS1 | 0.329848166 mirna_lnc |
| 33573 hsa-mir-16-1 | AC131212.4  | 0.398576913 mirna_lnc |
| 33574 hsa-mir-16-1 | AC092669.1  | 0.312653054 mirna_lnc |
| 33575 hsa-mir-16-1 | AP002336.2  | 0.374416912 mirna_lnc |
| 33576 hsa-mir-16-1 | AC145207.5  | 0.311523709 mirna_lnc |
| 33577 hsa-mir-16-1 | LINC02562   | 0.303184173 mirna_lnc |
| 33578 hsa-mir-16-1 | AC008115.1  | 0.34973389 mirna_lnc  |
| 33579 hsa-mir-16-1 | AC024560.3  | 0.329338731 mirna_lnc |
| 33580 hsa-mir-16-1 | AC136475.1  | 0.318480739 mirna_lnc |
| 33581 hsa-mir-16-1 | AC009271.1  | 0.317019155 mirna_lnc |
| 33582 hsa-mir-16-1 | AC098818.2  | 0.368808022 mirna_lnc |
| 33583 hsa-mir-16-1 | AC107214.1  | 0.378165098 mirna_lnc |
| 33584 hsa-mir-16-1 | LINC00885   | 0.316484537 mirna_lnc |
| 33585 hsa-mir-16-1 | AC079174.1  | 0.341370736 mirna_lnc |
| 33586 hsa-mir-16-1 | DDR1-DT     | 0.3009276 mirna_lnc   |
| 33587 hsa-mir-16-1 | AC079915.1  | 0.361523554 mirna_lnc |

|                    |            |                       |
|--------------------|------------|-----------------------|
| 33588 hsa-mir-16-1 | AC007250.1 | 0.325467004 mirna_lnc |
| 33589 hsa-mir-16-1 | AC098936.1 | 0.427744828 mirna_lnc |
| 33590 hsa-mir-16-1 | AC138207.2 | 0.32663037 mirna_lnc  |
| 33591 hsa-mir-16-1 | AC080013.6 | 0.300556284 mirna_lnc |
| 33592 hsa-mir-16-1 | AL121989.1 | 0.318308609 mirna_lnc |
| 33593 hsa-mir-16-1 | AL359198.1 | 0.318719175 mirna_lnc |
| 33594 hsa-mir-16-1 | AL118511.1 | 0.307465425 mirna_lnc |
| 33595 hsa-mir-16-1 | DLGAP1-AS3 | 0.383039842 mirna_lnc |
| 33596 hsa-mir-16-1 | GIHCG      | 0.382554992 mirna_lnc |
| 33597 hsa-mir-16-1 | Z93241.1   | 0.35861656 mirna_lnc  |
| 33598 hsa-mir-16-1 | LINC02470  | 0.56138929 mirna_lnc  |
| 33599 hsa-mir-16-1 | AC135178.5 | 0.335208166 mirna_lnc |
| 33600 hsa-mir-16-1 | AC106820.4 | 0.350601825 mirna_lnc |
| 33601 hsa-mir-16-1 | AC107982.2 | 0.322960672 mirna_lnc |
| 33602 hsa-mir-16-1 | AC017104.3 | 0.305037052 mirna_lnc |
| 33603 hsa-mir-16-1 | AC007497.1 | 0.346062641 mirna_lnc |
| 33604 hsa-mir-16-1 | AP001972.4 | 0.300122636 mirna_lnc |
| 33605 hsa-mir-16-1 | AF213884.3 | 0.373116968 mirna_lnc |
| 33606 hsa-mir-16-1 | CAMTA1-IT1 | 0.339199885 mirna_lnc |
| 33607 hsa-mir-3074 | AC103746.1 | 0.434385112 mirna_lnc |
| 33608 hsa-mir-3074 | LINC01560  | 0.328254602 mirna_lnc |
| 33609 hsa-mir-3074 | LINC01625  | 0.398149625 mirna_lnc |
| 33610 hsa-mir-3074 | AC245100.6 | 0.310679391 mirna_lnc |
| 33611 hsa-mir-3074 | TMPO-AS1   | 0.329970078 mirna_lnc |
| 33612 hsa-mir-3074 | AL353194.1 | 0.335136844 mirna_lnc |
| 33613 hsa-mir-3074 | CEP83-DT   | 0.350121597 mirna_lnc |
| 33614 hsa-mir-3074 | AC124303.1 | 0.367085581 mirna_lnc |
| 33615 hsa-mir-3074 | LINC02585  | 0.323387013 mirna_lnc |
| 33616 hsa-mir-3074 | AL035458.2 | 0.373481923 mirna_lnc |
| 33617 hsa-mir-3074 | AC074117.1 | 0.320415845 mirna_lnc |
| 33618 hsa-mir-3074 | AC007405.2 | 0.364601977 mirna_lnc |
| 33619 hsa-mir-3074 | AC022387.1 | 0.366864053 mirna_lnc |
| 33620 hsa-mir-3074 | AL139288.1 | 0.328985287 mirna_lnc |
| 33621 hsa-mir-3074 | AC104667.1 | 0.4160988 mirna_lnc   |
| 33622 hsa-mir-3074 | AL137802.2 | 0.333302043 mirna_lnc |
| 33623 hsa-mir-3074 | AC093642.2 | 0.437137809 mirna_lnc |
| 33624 hsa-mir-3074 | AL157823.2 | 0.317606878 mirna_lnc |
| 33625 hsa-mir-3074 | AP000553.2 | 0.480817128 mirna_lnc |
| 33626 hsa-mir-3074 | AC004835.1 | 0.33017976 mirna_lnc  |
| 33627 hsa-mir-3074 | AC110813.1 | 0.310453482 mirna_lnc |
| 33628 hsa-mir-3074 | LINC01126  | 0.314436495 mirna_lnc |
| 33629 hsa-mir-3074 | LINC01087  | 0.514575472 mirna_lnc |
| 33630 hsa-mir-3074 | AC135803.1 | 0.377787834 mirna_lnc |
| 33631 hsa-mir-3074 | AL121832.3 | 0.342244845 mirna_lnc |
| 33632 hsa-mir-3074 | AL031985.3 | 0.327794145 mirna_lnc |
| 33633 hsa-mir-3074 | AL391152.1 | 0.342818835 mirna_lnc |
| 33634 hsa-mir-3074 | MAGEA4-AS1 | 0.333135605 mirna_lnc |
| 33635 hsa-mir-3074 | AC090578.2 | 0.346468162 mirna_lnc |
| 33636 hsa-mir-3074 | AC096887.2 | 0.31709287 mirna_lnc  |
| 33637 hsa-mir-3074 | AL078605.1 | 0.330234713 mirna_lnc |
| 33638 hsa-mir-3074 | Z95115.1   | 0.396827749 mirna_lnc |
| 33639 hsa-mir-3074 | LINC01143  | 0.365964694 mirna_lnc |
| 33640 hsa-mir-3074 | AC034102.6 | 0.363756493 mirna_lnc |
| 33641 hsa-mir-3074 | AC024361.2 | 0.306235267 mirna_lnc |

|       |              |              |             |           |
|-------|--------------|--------------|-------------|-----------|
| 33642 | hsa-mir-3074 | ARHGAP31-AS1 | 0.342509277 | mirna_lnc |
| 33643 | hsa-mir-3074 | AL592494.2   | 0.333561338 | mirna_lnc |
| 33644 | hsa-mir-3074 | AC007996.1   | 0.395789526 | mirna_lnc |
| 33645 | hsa-mir-3074 | LINC01521    | 0.303669246 | mirna_lnc |
| 33646 | hsa-mir-3074 | AC016708.1   | 0.430430516 | mirna_lnc |
| 33647 | hsa-mir-3074 | DNAJC3-DT    | 0.306395635 | mirna_lnc |
| 33648 | hsa-mir-3074 | AC099786.1   | 0.48984575  | mirna_lnc |
| 33649 | hsa-mir-3074 | AL354892.2   | 0.370307654 | mirna_lnc |
| 33650 | hsa-mir-3074 | AC011773.4   | 0.32447394  | mirna_lnc |
| 33651 | hsa-mir-3074 | AP002360.3   | 0.35446549  | mirna_lnc |
| 33652 | hsa-mir-3074 | AC016205.1   | 0.318147101 | mirna_lnc |
| 33653 | hsa-mir-3074 | AC005379.1   | 0.334460035 | mirna_lnc |
| 33654 | hsa-mir-3074 | ERICD        | 0.359109154 | mirna_lnc |
| 33655 | hsa-mir-3074 | DNM3-IT1     | 0.427094437 | mirna_lnc |
| 33656 | hsa-mir-3074 | AL451064.1   | 0.4255557   | mirna_lnc |
| 33657 | hsa-mir-3074 | AL096677.1   | 0.325267519 | mirna_lnc |
| 33658 | hsa-mir-3074 | CNNM3-DT     | 0.300426195 | mirna_lnc |
| 33659 | hsa-mir-3074 | AL645608.4   | 0.380260164 | mirna_lnc |
| 33660 | hsa-mir-3074 | AL135787.1   | 0.311795832 | mirna_lnc |
| 33661 | hsa-mir-3074 | AC126407.1   | 0.408076394 | mirna_lnc |
| 33662 | hsa-mir-3074 | AC007663.3   | 0.345911856 | mirna_lnc |
| 33663 | hsa-mir-3074 | AC002091.1   | 0.307233739 | mirna_lnc |
| 33664 | hsa-mir-3074 | AC136475.1   | 0.355018408 | mirna_lnc |
| 33665 | hsa-mir-3074 | AL138831.1   | 0.31658509  | mirna_lnc |
| 33666 | hsa-mir-3074 | MAP3K2-DT    | 0.323924227 | mirna_lnc |
| 33667 | hsa-mir-3074 | AC023983.2   | 0.322630156 | mirna_lnc |
| 33668 | hsa-mir-3074 | AC010735.1   | 0.385378044 | mirna_lnc |
| 33669 | hsa-mir-3074 | AL022324.3   | 0.445218142 | mirna_lnc |
| 33670 | hsa-mir-3074 | AC007391.1   | 0.33669258  | mirna_lnc |
| 33671 | hsa-mir-3074 | BX649601.1   | 0.311095269 | mirna_lnc |
| 33672 | hsa-mir-3074 | LINC01238    | 0.375460485 | mirna_lnc |
| 33673 | hsa-mir-3074 | AC091152.2   | 0.411010273 | mirna_lnc |
| 33674 | hsa-mir-3074 | ATP2B1-AS1   | 0.392128968 | mirna_lnc |
| 33675 | hsa-mir-3074 | AL355488.1   | 0.314546703 | mirna_lnc |
| 33676 | hsa-mir-3074 | AP000255.1   | 0.394478133 | mirna_lnc |
| 33677 | hsa-mir-3074 | AL132765.2   | 0.306028784 | mirna_lnc |
| 33678 | hsa-mir-3074 | AC127024.2   | 0.375826296 | mirna_lnc |
| 33679 | hsa-mir-3074 | AC104072.1   | 0.43586173  | mirna_lnc |
| 33680 | hsa-mir-3074 | AC119403.1   | 0.310322252 | mirna_lnc |
| 33681 | hsa-mir-3074 | AP006621.5   | 0.344984211 | mirna_lnc |
| 33682 | hsa-mir-3074 | AC010336.2   | 0.336768927 | mirna_lnc |
| 33683 | hsa-mir-3074 | AL391001.1   | 0.317402665 | mirna_lnc |
| 33684 | hsa-mir-3074 | AL031658.1   | 0.33531592  | mirna_lnc |
| 33685 | hsa-mir-3074 | AC023824.6   | 0.306550368 | mirna_lnc |
| 33686 | hsa-mir-3074 | HM13-AS1     | 0.325056446 | mirna_lnc |
| 33687 | hsa-mir-3074 | TTC39C-AS1   | 0.323456794 | mirna_lnc |
| 33688 | hsa-mir-3074 | KLHL7-DT     | 0.347922244 | mirna_lnc |
| 33689 | hsa-mir-3074 | AL390778.2   | 0.331024957 | mirna_lnc |
| 33690 | hsa-mir-3074 | AC092447.5   | 0.485120155 | mirna_lnc |
| 33691 | hsa-mir-3074 | AC010336.5   | 0.370552484 | mirna_lnc |
| 33692 | hsa-mir-3074 | AC107464.3   | 0.449365235 | mirna_lnc |
| 33693 | hsa-mir-3074 | AL513534.2   | 0.333255026 | mirna_lnc |
| 33694 | hsa-mir-3074 | LINC01901    | 0.332204203 | mirna_lnc |
| 33695 | hsa-mir-3074 | AL008721.1   | 0.312594371 | mirna_lnc |

|                    |             |                       |
|--------------------|-------------|-----------------------|
| 33696 hsa-mir-3074 | FGF12-AS3   | 0.400374411 mirna_lnc |
| 33697 hsa-mir-3074 | SMC2-AS1    | 0.342374731 mirna_lnc |
| 33698 hsa-mir-3074 | AL162231.4  | 0.316092469 mirna_lnc |
| 33699 hsa-mir-3074 | AC099667.1  | 0.304012382 mirna_lnc |
| 33700 hsa-mir-3074 | AL136531.1  | 0.30336035 mirna_lnc  |
| 33701 hsa-mir-3074 | MAGEA8-AS1  | 0.309646579 mirna_lnc |
| 33702 hsa-mir-3074 | AL118511.1  | 0.330308519 mirna_lnc |
| 33703 hsa-mir-3074 | AC004925.1  | 0.387291459 mirna_lnc |
| 33704 hsa-mir-3074 | AP000350.5  | 0.364028551 mirna_lnc |
| 33705 hsa-mir-3074 | AC090772.3  | 0.463497089 mirna_lnc |
| 33706 hsa-mir-3074 | AC073389.3  | 0.381268651 mirna_lnc |
| 33707 hsa-mir-3074 | MAPT-IT1    | 0.361235169 mirna_lnc |
| 33708 hsa-mir-3074 | AP000350.7  | 0.338606681 mirna_lnc |
| 33709 hsa-mir-3074 | AL138831.3  | 0.31117548 mirna_lnc  |
| 33710 hsa-mir-3074 | AC017100.1  | 0.390982182 mirna_lnc |
| 33711 hsa-mir-3074 | AC005006.1  | 0.537030676 mirna_lnc |
| 33712 hsa-mir-3074 | AL645608.6  | 0.319423828 mirna_lnc |
| 33713 hsa-mir-3074 | AL451064.2  | 0.413672544 mirna_lnc |
| 33714 hsa-mir-3074 | AL353726.2  | 0.395807539 mirna_lnc |
| 33715 hsa-mir-3074 | SPACA6P-AS  | 0.364804264 mirna_lnc |
| 33716 hsa-mir-3074 | AC133961.1  | 0.389535244 mirna_lnc |
| 33717 hsa-mir-3074 | AL161725.2  | 0.302186019 mirna_lnc |
| 33718 hsa-mir-3074 | AL137003.2  | 0.368050676 mirna_lnc |
| 33719 hsa-mir-3074 | L29074.1    | 0.407706392 mirna_lnc |
| 33720 hsa-mir-3074 | AC005391.1  | 0.405239399 mirna_lnc |
| 33721 hsa-mir-3074 | CRTC3-AS1   | 0.329122638 mirna_lnc |
| 33722 hsa-mir-3074 | FGF12-AS2   | 0.351309426 mirna_lnc |
| 33723 hsa-mir-3074 | AL157931.1  | 0.473170831 mirna_lnc |
| 33724 hsa-mir-3074 | AC118758.3  | 0.318872757 mirna_lnc |
| 33725 hsa-mir-3074 | AL354919.1  | 0.456206895 mirna_lnc |
| 33726 hsa-mir-3074 | AL161729.4  | 0.363900704 mirna_lnc |
| 33727 hsa-mir-3074 | AP001476.1  | 0.309657961 mirna_lnc |
| 33728 hsa-mir-3074 | AL645608.2  | 0.368990046 mirna_lnc |
| 33729 hsa-mir-3074 | AC010735.2  | 0.399275058 mirna_lnc |
| 33730 hsa-mir-3074 | AC092839.2  | 0.314018188 mirna_lnc |
| 33731 hsa-mir-3074 | AP001626.1  | 0.338010169 mirna_lnc |
| 33732 hsa-mir-3074 | AL024498.1  | 0.360183927 mirna_lnc |
| 33733 hsa-mir-3074 | AP001922.6  | 0.315629239 mirna_lnc |
| 33734 hsa-mir-3074 | AC127024.3  | 0.357889838 mirna_lnc |
| 33735 hsa-mir-3074 | AC137767.1  | 0.34338916 mirna_lnc  |
| 33736 hsa-mir-3647 | AP000708.1  | 0.310140255 mirna_lnc |
| 33737 hsa-mir-3647 | AC026356.1  | 0.393217654 mirna_lnc |
| 33738 hsa-mir-3647 | AC022031.1  | 0.302993574 mirna_lnc |
| 33739 hsa-mir-3647 | LINC01873   | 0.317800583 mirna_lnc |
| 33740 hsa-mir-3647 | AC020658.4  | 0.319819855 mirna_lnc |
| 33741 hsa-mir-3647 | AC004241.3  | 0.307014288 mirna_lnc |
| 33742 hsa-mir-3647 | AC048344.4  | 0.308892704 mirna_lnc |
| 33743 hsa-mir-3647 | CEP83-DT    | 0.311480975 mirna_lnc |
| 33744 hsa-mir-3647 | AC012183.1  | 0.344475524 mirna_lnc |
| 33745 hsa-mir-3647 | HOXC-AS2    | 0.316215676 mirna_lnc |
| 33746 hsa-mir-3647 | AP001021.2  | 0.361750451 mirna_lnc |
| 33747 hsa-mir-3647 | AL031667.3  | 0.301010289 mirna_lnc |
| 33748 hsa-mir-3647 | L3MBTL4-AS1 | 0.326198187 mirna_lnc |
| 33749 hsa-mir-3647 | AC004943.2  | 0.307277213 mirna_lnc |

|                    |            |                       |
|--------------------|------------|-----------------------|
| 33750 hsa-mir-3647 | AP000526.1 | 0.300716886 mirna_lnc |
| 33751 hsa-mir-3647 | AC073263.2 | 0.308193041 mirna_lnc |
| 33752 hsa-mir-3647 | AC002066.1 | 0.345185965 mirna_lnc |
| 33753 hsa-mir-3647 | AC027627.1 | 0.324235397 mirna_lnc |
| 33754 hsa-mir-3647 | LINC02542  | 0.302512558 mirna_lnc |
| 33755 hsa-mir-3647 | LINC01691  | 0.303813566 mirna_lnc |
| 33756 hsa-mir-3647 | AC092159.2 | 0.34098418 mirna_lnc  |
| 33757 hsa-mir-3647 | AC092964.1 | 0.395814803 mirna_lnc |
| 33758 hsa-mir-3647 | AL390037.1 | 0.351379045 mirna_lnc |
| 33759 hsa-mir-3647 | AC024940.6 | 0.30125166 mirna_lnc  |
| 33760 hsa-mir-3647 | AC090673.1 | 0.300890734 mirna_lnc |
| 33761 hsa-mir-3647 | AC027279.1 | 0.308027614 mirna_lnc |
| 33762 hsa-mir-3647 | AC004069.1 | 0.308735337 mirna_lnc |
| 33763 hsa-mir-3647 | AC131025.1 | 0.302784029 mirna_lnc |
| 33764 hsa-mir-3647 | AC004920.1 | 0.308577902 mirna_lnc |
| 33765 hsa-mir-3647 | AC021683.3 | 0.336808534 mirna_lnc |
| 33766 hsa-mir-3647 | AC026782.2 | 0.348490515 mirna_lnc |
| 33767 hsa-mir-3647 | AP000640.2 | 0.307536957 mirna_lnc |
| 33768 hsa-mir-3647 | LINC02450  | 0.378447121 mirna_lnc |
| 33769 hsa-mir-3647 | AC004158.1 | 0.328754378 mirna_lnc |
| 33770 hsa-mir-3647 | AC026782.1 | 0.311370957 mirna_lnc |
| 33771 hsa-mir-3647 | HELLPAR    | 0.36492153 mirna_lnc  |
| 33772 hsa-mir-3647 | AC079684.1 | 0.349884986 mirna_lnc |
| 33773 hsa-mir-3647 | AC090578.2 | 0.362446905 mirna_lnc |
| 33774 hsa-mir-3647 | AC092807.2 | 0.317224914 mirna_lnc |
| 33775 hsa-mir-3647 | LINC01850  | 0.409858061 mirna_lnc |
| 33776 hsa-mir-3647 | LINC01143  | 0.312506246 mirna_lnc |
| 33777 hsa-mir-3647 | AC013391.1 | 0.322548048 mirna_lnc |
| 33778 hsa-mir-3647 | AC009502.1 | 0.325922584 mirna_lnc |
| 33779 hsa-mir-3647 | UBR5-AS1   | 0.32411702 mirna_lnc  |
| 33780 hsa-mir-3647 | AC130650.2 | 0.312555457 mirna_lnc |
| 33781 hsa-mir-3647 | LINC02607  | 0.337049246 mirna_lnc |
| 33782 hsa-mir-3647 | AL157400.4 | 0.319268948 mirna_lnc |
| 33783 hsa-mir-3647 | AL121652.1 | 0.315055537 mirna_lnc |
| 33784 hsa-mir-3647 | NCKAP5-AS1 | 0.323631374 mirna_lnc |
| 33785 hsa-mir-3647 | SREBF2-AS1 | 0.333259546 mirna_lnc |
| 33786 hsa-mir-3647 | AC118755.1 | 0.318103481 mirna_lnc |
| 33787 hsa-mir-3647 | AC010969.2 | 0.366680695 mirna_lnc |
| 33788 hsa-mir-3647 | AC110769.2 | 0.30819357 mirna_lnc  |
| 33789 hsa-mir-3647 | CXXC4-AS1  | 0.349193032 mirna_lnc |
| 33790 hsa-mir-3647 | AC005593.1 | 0.347600322 mirna_lnc |
| 33791 hsa-mir-3647 | AC016708.1 | 0.316871636 mirna_lnc |
| 33792 hsa-mir-3647 | AC004943.3 | 0.367333099 mirna_lnc |
| 33793 hsa-mir-3647 | AC004053.1 | 0.301334547 mirna_lnc |
| 33794 hsa-mir-3647 | AC093424.1 | 0.305944391 mirna_lnc |
| 33795 hsa-mir-3647 | AC093591.2 | 0.305501922 mirna_lnc |
| 33796 hsa-mir-3647 | AC019155.3 | 0.386948514 mirna_lnc |
| 33797 hsa-mir-3647 | AC117382.2 | 0.355207199 mirna_lnc |
| 33798 hsa-mir-3647 | AC063948.1 | 0.340086729 mirna_lnc |
| 33799 hsa-mir-3647 | LINC01416  | 0.341930949 mirna_lnc |
| 33800 hsa-mir-3647 | AC087742.1 | 0.347312679 mirna_lnc |
| 33801 hsa-mir-3647 | AP001642.1 | 0.315143849 mirna_lnc |
| 33802 hsa-mir-3647 | AC012640.5 | 0.356716299 mirna_lnc |
| 33803 hsa-mir-3647 | AC005379.1 | 0.319622972 mirna_lnc |

|                    |             |                       |
|--------------------|-------------|-----------------------|
| 33804 hsa-mir-3647 | AC092669.1  | 0.339976994 mirna_lnc |
| 33805 hsa-mir-3647 | AP002336.2  | 0.308059293 mirna_lnc |
| 33806 hsa-mir-3647 | AC091946.2  | 0.338460379 mirna_lnc |
| 33807 hsa-mir-3647 | DNM3-IT1    | 0.33657052 mirna_lnc  |
| 33808 hsa-mir-3647 | AC006206.1  | 0.324781535 mirna_lnc |
| 33809 hsa-mir-3647 | AC090772.4  | 0.34915446 mirna_lnc  |
| 33810 hsa-mir-3647 | KIRREL1-IT1 | 0.305428294 mirna_lnc |
| 33811 hsa-mir-3647 | AL451064.1  | 0.3176191 mirna_lnc   |
| 33812 hsa-mir-3647 | AL645608.4  | 0.312468765 mirna_lnc |
| 33813 hsa-mir-3647 | AC008115.1  | 0.378895478 mirna_lnc |
| 33814 hsa-mir-3647 | AC138951.2  | 0.322987981 mirna_lnc |
| 33815 hsa-mir-3647 | AC008115.2  | 0.359829991 mirna_lnc |
| 33816 hsa-mir-3647 | AC009120.5  | 0.326517322 mirna_lnc |
| 33817 hsa-mir-3647 | AC022762.1  | 0.33176117 mirna_lnc  |
| 33818 hsa-mir-3647 | AL031600.2  | 0.31741934 mirna_lnc  |
| 33819 hsa-mir-3647 | AC107308.1  | 0.360549588 mirna_lnc |
| 33820 hsa-mir-3647 | AP001178.3  | 0.354039425 mirna_lnc |
| 33821 hsa-mir-3647 | AC107214.1  | 0.334958802 mirna_lnc |
| 33822 hsa-mir-3647 | AC079600.3  | 0.325732126 mirna_lnc |
| 33823 hsa-mir-3647 | AL022324.3  | 0.320319112 mirna_lnc |
| 33824 hsa-mir-3647 | AC073896.4  | 0.376768652 mirna_lnc |
| 33825 hsa-mir-3647 | AP005060.1  | 0.341707939 mirna_lnc |
| 33826 hsa-mir-3647 | AC011446.1  | 0.369555029 mirna_lnc |
| 33827 hsa-mir-3647 | AP001029.2  | 0.320155145 mirna_lnc |
| 33828 hsa-mir-3647 | AC096992.2  | 0.372278916 mirna_lnc |
| 33829 hsa-mir-3647 | AC006237.1  | 0.318897494 mirna_lnc |
| 33830 hsa-mir-3647 | AC087501.4  | 0.308341474 mirna_lnc |
| 33831 hsa-mir-3647 | AC068860.1  | 0.303420035 mirna_lnc |
| 33832 hsa-mir-3647 | AL122125.1  | 0.313066775 mirna_lnc |
| 33833 hsa-mir-3647 | AC064807.4  | 0.3402361 mirna_lnc   |
| 33834 hsa-mir-3647 | AP000962.1  | 0.362252459 mirna_lnc |
| 33835 hsa-mir-3647 | AC007389.5  | 0.37004713 mirna_lnc  |
| 33836 hsa-mir-3647 | AC010834.2  | 0.313625118 mirna_lnc |
| 33837 hsa-mir-3647 | AC060809.1  | 0.311123069 mirna_lnc |
| 33838 hsa-mir-3647 | AL513534.2  | 0.314242694 mirna_lnc |
| 33839 hsa-mir-3647 | AC019131.1  | 0.318458569 mirna_lnc |
| 33840 hsa-mir-3647 | AC025219.1  | 0.341713769 mirna_lnc |
| 33841 hsa-mir-3647 | AL138881.1  | 0.305975737 mirna_lnc |
| 33842 hsa-mir-3647 | AC090907.1  | 0.311382806 mirna_lnc |
| 33843 hsa-mir-3647 | AP000962.2  | 0.367721858 mirna_lnc |
| 33844 hsa-mir-3647 | AL008721.1  | 0.301060145 mirna_lnc |
| 33845 hsa-mir-3647 | AC018682.2  | 0.311943321 mirna_lnc |
| 33846 hsa-mir-3647 | AL032819.1  | 0.346116048 mirna_lnc |
| 33847 hsa-mir-3647 | MAGEA8-AS1  | 0.342473005 mirna_lnc |
| 33848 hsa-mir-3647 | LINC00485   | 0.376882251 mirna_lnc |
| 33849 hsa-mir-3647 | AC087392.1  | 0.329702881 mirna_lnc |
| 33850 hsa-mir-3647 | AC004012.1  | 0.316988473 mirna_lnc |
| 33851 hsa-mir-3647 | Z99129.3    | 0.311192533 mirna_lnc |
| 33852 hsa-mir-3647 | AP000350.5  | 0.307229946 mirna_lnc |
| 33853 hsa-mir-3647 | AL583808.1  | 0.311866738 mirna_lnc |
| 33854 hsa-mir-3647 | AP005205.3  | 0.3003414 mirna_lnc   |
| 33855 hsa-mir-3647 | AL627171.1  | 0.337958692 mirna_lnc |
| 33856 hsa-mir-3647 | AL096701.3  | 0.305165865 mirna_lnc |
| 33857 hsa-mir-3647 | AC079414.3  | 0.343066295 mirna_lnc |

|                    |             |                       |
|--------------------|-------------|-----------------------|
| 33858 hsa-mir-3647 | AC008957.3  | 0.303202152 mirna_lnc |
| 33859 hsa-mir-3647 | AC135178.5  | 0.326860651 mirna_lnc |
| 33860 hsa-mir-3647 | AL645608.6  | 0.308836247 mirna_lnc |
| 33861 hsa-mir-3647 | AL603839.4  | 0.317416296 mirna_lnc |
| 33862 hsa-mir-3647 | AL353726.2  | 0.392432337 mirna_lnc |
| 33863 hsa-mir-3647 | AC090061.1  | 0.368507683 mirna_lnc |
| 33864 hsa-mir-3647 | LINC00311   | 0.336842941 mirna_lnc |
| 33865 hsa-mir-3647 | AC005034.3  | 0.34650119 mirna_lnc  |
| 33866 hsa-mir-3647 | AC073573.1  | 0.307826742 mirna_lnc |
| 33867 hsa-mir-3647 | AC007497.1  | 0.362645717 mirna_lnc |
| 33868 hsa-mir-3647 | AC005197.1  | 0.342257327 mirna_lnc |
| 33869 hsa-mir-3647 | AC145423.2  | 0.366099971 mirna_lnc |
| 33870 hsa-mir-3647 | AC103876.1  | 0.351571051 mirna_lnc |
| 33871 hsa-mir-3647 | CYP51A1-AS1 | 0.320084303 mirna_lnc |
| 33872 hsa-mir-3647 | AP001893.3  | 0.30154193 mirna_lnc  |
| 33873 hsa-mir-3647 | RN7SL832P   | 0.302081854 mirna_lnc |
| 33874 hsa-mir-3647 | LINC02076   | 0.341169994 mirna_lnc |
| 33875 hsa-mir-3647 | AL358933.1  | 0.310924706 mirna_lnc |
| 33876 hsa-mir-3647 | AC068726.1  | 0.313624206 mirna_lnc |
| 33877 hsa-mir-3647 | AC103996.2  | 0.384284429 mirna_lnc |
| 33878 hsa-mir-3647 | AC099506.1  | 0.336912183 mirna_lnc |
| 33879 hsa-mir-3647 | AC012486.1  | 0.309579916 mirna_lnc |
| 33880 hsa-mir-3647 | AC099684.1  | 0.397179389 mirna_lnc |
| 33881 hsa-mir-3647 | AC120349.2  | 0.307178161 mirna_lnc |
| 33882 hsa-mir-3647 | AL136146.2  | 0.345346181 mirna_lnc |
| 33883 hsa-mir-3647 | AC108704.1  | 0.329361377 mirna_lnc |
| 33884 hsa-mir-3647 | AC009970.1  | 0.310034428 mirna_lnc |
| 33885 hsa-mir-425  | AL590004.3  | 0.318113237 mirna_lnc |
| 33886 hsa-mir-425  | AC019294.2  | 0.308771539 mirna_lnc |
| 33887 hsa-mir-425  | AC245100.6  | 0.439419758 mirna_lnc |
| 33888 hsa-mir-425  | TMPO-AS1    | 0.300996958 mirna_lnc |
| 33889 hsa-mir-425  | AC020658.4  | 0.369696508 mirna_lnc |
| 33890 hsa-mir-425  | AL035461.2  | 0.318572719 mirna_lnc |
| 33891 hsa-mir-425  | SCAT2       | 0.336110717 mirna_lnc |
| 33892 hsa-mir-425  | CEP83-DT    | 0.316176377 mirna_lnc |
| 33893 hsa-mir-425  | HOXC-AS2    | 0.315053245 mirna_lnc |
| 33894 hsa-mir-425  | AC124303.1  | 0.472099087 mirna_lnc |
| 33895 hsa-mir-425  | AC027228.2  | 0.347997061 mirna_lnc |
| 33896 hsa-mir-425  | LINC02585   | 0.404557689 mirna_lnc |
| 33897 hsa-mir-425  | AC129507.3  | 0.351388043 mirna_lnc |
| 33898 hsa-mir-425  | AC074117.1  | 0.351067821 mirna_lnc |
| 33899 hsa-mir-425  | AP005136.2  | 0.304014595 mirna_lnc |
| 33900 hsa-mir-425  | AC027117.2  | 0.412285744 mirna_lnc |
| 33901 hsa-mir-425  | AL117379.1  | 0.30789615 mirna_lnc  |
| 33902 hsa-mir-425  | AC026369.2  | 0.357000643 mirna_lnc |
| 33903 hsa-mir-425  | LINC00567   | 0.304752393 mirna_lnc |
| 33904 hsa-mir-425  | AC103858.2  | 0.346503675 mirna_lnc |
| 33905 hsa-mir-425  | AL133467.2  | 0.420790888 mirna_lnc |
| 33906 hsa-mir-425  | AC104667.1  | 0.330821562 mirna_lnc |
| 33907 hsa-mir-425  | AC131009.3  | 0.329437873 mirna_lnc |
| 33908 hsa-mir-425  | PRC1-AS1    | 0.30991744 mirna_lnc  |
| 33909 hsa-mir-425  | AC012467.1  | 0.432847238 mirna_lnc |
| 33910 hsa-mir-425  | AC079907.1  | 0.306927927 mirna_lnc |
| 33911 hsa-mir-425  | LINC02003   | 0.392762072 mirna_lnc |



|                   |             |                        |
|-------------------|-------------|------------------------|
| 33912 hsa-mir-425 | AC125257. 1 | 0. 364898873 mirna_lnc |
| 33913 hsa-mir-425 | AP000553. 2 | 0. 30992327 mirna_lnc  |
| 33914 hsa-mir-425 | AC104958. 2 | 0. 369574633 mirna_lnc |
| 33915 hsa-mir-425 | AC004835. 1 | 0. 470797402 mirna_lnc |
| 33916 hsa-mir-425 | AC010536. 1 | 0. 361493017 mirna_lnc |
| 33917 hsa-mir-425 | AC024884. 2 | 0. 322404361 mirna_lnc |
| 33918 hsa-mir-425 | AC008543. 1 | 0. 383837303 mirna_lnc |
| 33919 hsa-mir-425 | AC016394. 2 | 0. 362981519 mirna_lnc |
| 33920 hsa-mir-425 | LINC01087   | 0. 485627227 mirna_lnc |
| 33921 hsa-mir-425 | AL121832. 3 | 0. 473462647 mirna_lnc |
| 33922 hsa-mir-425 | GK-IT1      | 0. 398355005 mirna_lnc |
| 33923 hsa-mir-425 | AC026992. 2 | 0. 314650398 mirna_lnc |
| 33924 hsa-mir-425 | AL358473. 1 | 0. 39145198 mirna_lnc  |
| 33925 hsa-mir-425 | ABALON      | 0. 303230897 mirna_lnc |
| 33926 hsa-mir-425 | AC068831. 1 | 0. 307536446 mirna_lnc |
| 33927 hsa-mir-425 | AC096887. 2 | 0. 509826503 mirna_lnc |
| 33928 hsa-mir-425 | AC093227. 1 | 0. 306773711 mirna_lnc |
| 33929 hsa-mir-425 | AC090517. 2 | 0. 30030512 mirna_lnc  |
| 33930 hsa-mir-425 | AC034102. 6 | 0. 398274084 mirna_lnc |
| 33931 hsa-mir-425 | TRPM2-AS    | 0. 347201974 mirna_lnc |
| 33932 hsa-mir-425 | AC012150. 1 | 0. 326036922 mirna_lnc |
| 33933 hsa-mir-425 | AF186192. 3 | 0. 365011467 mirna_lnc |
| 33934 hsa-mir-425 | AC067863. 2 | 0. 359613054 mirna_lnc |
| 33935 hsa-mir-425 | AF186192. 1 | 0. 345025177 mirna_lnc |
| 33936 hsa-mir-425 | AC004943. 3 | 0. 311096168 mirna_lnc |
| 33937 hsa-mir-425 | AL358472. 3 | 0. 370690214 mirna_lnc |
| 33938 hsa-mir-425 | AL121721. 1 | 0. 331052887 mirna_lnc |
| 33939 hsa-mir-425 | LINC02254   | 0. 3065944 mirna_lnc   |
| 33940 hsa-mir-425 | AP002360. 3 | 0. 308096504 mirna_lnc |
| 33941 hsa-mir-425 | AC090527. 3 | 0. 419862062 mirna_lnc |
| 33942 hsa-mir-425 | RNASEH1-AS1 | 0. 331506224 mirna_lnc |
| 33943 hsa-mir-425 | AC005379. 1 | 0. 335153092 mirna_lnc |
| 33944 hsa-mir-425 | AL139082. 1 | 0. 350662798 mirna_lnc |
| 33945 hsa-mir-425 | AP001065. 2 | 0. 346704295 mirna_lnc |
| 33946 hsa-mir-425 | LINC01101   | 0. 460048506 mirna_lnc |
| 33947 hsa-mir-425 | CNNM3-DT    | 0. 31520373 mirna_lnc  |
| 33948 hsa-mir-425 | AP003733. 4 | 0. 334901353 mirna_lnc |
| 33949 hsa-mir-425 | AC002091. 1 | 0. 341601549 mirna_lnc |
| 33950 hsa-mir-425 | AC107926. 1 | 0. 350900541 mirna_lnc |
| 33951 hsa-mir-425 | AC090774. 2 | 0. 319989871 mirna_lnc |
| 33952 hsa-mir-425 | STAM-AS1    | 0. 30285847 mirna_lnc  |
| 33953 hsa-mir-425 | AL590133. 1 | 0. 313260451 mirna_lnc |
| 33954 hsa-mir-425 | LINC01730   | 0. 325909858 mirna_lnc |
| 33955 hsa-mir-425 | LINC02204   | 0. 388084266 mirna_lnc |
| 33956 hsa-mir-425 | AC124067. 4 | 0. 391262389 mirna_lnc |
| 33957 hsa-mir-425 | AC007952. 2 | 0. 349780153 mirna_lnc |
| 33958 hsa-mir-425 | AL022324. 3 | 0. 31779144 mirna_lnc  |
| 33959 hsa-mir-425 | U73166. 1   | 0. 315840028 mirna_lnc |
| 33960 hsa-mir-425 | AL355488. 1 | 0. 388913975 mirna_lnc |
| 33961 hsa-mir-425 | AL359697. 1 | 0. 366298196 mirna_lnc |
| 33962 hsa-mir-425 | AC127024. 2 | 0. 309455164 mirna_lnc |
| 33963 hsa-mir-425 | AC119403. 1 | 0. 326546066 mirna_lnc |
| 33964 hsa-mir-425 | AP006621. 5 | 0. 450202948 mirna_lnc |
| 33965 hsa-mir-425 | LINC01756   | 0. 307335266 mirna_lnc |

|                   |            |                       |
|-------------------|------------|-----------------------|
| 33966 hsa-mir-425 | AC145207.9 | 0.303243629 mirna_lnc |
| 33967 hsa-mir-425 | AC007638.2 | 0.441109443 mirna_lnc |
| 33968 hsa-mir-425 | AC006111.2 | 0.327412834 mirna_lnc |
| 33969 hsa-mir-425 | AC090907.2 | 0.399950389 mirna_lnc |
| 33970 hsa-mir-425 | AC010327.4 | 0.317981509 mirna_lnc |
| 33971 hsa-mir-425 | AC011700.1 | 0.38196806 mirna_lnc  |
| 33972 hsa-mir-425 | AC244100.3 | 0.364929821 mirna_lnc |
| 33973 hsa-mir-425 | AC023824.6 | 0.370582138 mirna_lnc |
| 33974 hsa-mir-425 | AL606970.1 | 0.499441491 mirna_lnc |
| 33975 hsa-mir-425 | AP000842.3 | 0.332287221 mirna_lnc |
| 33976 hsa-mir-425 | AC092447.5 | 0.411523099 mirna_lnc |
| 33977 hsa-mir-425 | CATIP-AS2  | 0.312855552 mirna_lnc |
| 33978 hsa-mir-425 | AL136962.1 | 0.363163777 mirna_lnc |
| 33979 hsa-mir-425 | AC116036.2 | 0.302773873 mirna_lnc |
| 33980 hsa-mir-425 | AC116025.2 | 0.430672063 mirna_lnc |
| 33981 hsa-mir-425 | AC104534.1 | 0.414431459 mirna_lnc |
| 33982 hsa-mir-425 | AL109917.1 | 0.309862044 mirna_lnc |
| 33983 hsa-mir-425 | AC097639.1 | 0.350718711 mirna_lnc |
| 33984 hsa-mir-425 | AC024361.1 | 0.333885038 mirna_lnc |
| 33985 hsa-mir-425 | AC008555.7 | 0.33141115 mirna_lnc  |
| 33986 hsa-mir-425 | AC000036.1 | 0.326291247 mirna_lnc |
| 33987 hsa-mir-425 | FGF12-AS3  | 0.31878962 mirna_lnc  |
| 33988 hsa-mir-425 | AL607028.1 | 0.322649662 mirna_lnc |
| 33989 hsa-mir-425 | AC099667.1 | 0.411712406 mirna_lnc |
| 33990 hsa-mir-425 | AL121989.1 | 0.337136751 mirna_lnc |
| 33991 hsa-mir-425 | AC078852.2 | 0.377012188 mirna_lnc |
| 33992 hsa-mir-425 | LINC02365  | 0.51548869 mirna_lnc  |
| 33993 hsa-mir-425 | AL139286.2 | 0.342911867 mirna_lnc |
| 33994 hsa-mir-425 | AC097652.1 | 0.302798759 mirna_lnc |
| 33995 hsa-mir-425 | LINC02253  | 0.330511708 mirna_lnc |
| 33996 hsa-mir-425 | AL596442.2 | 0.36786899 mirna_lnc  |
| 33997 hsa-mir-425 | AC125616.1 | 0.308077498 mirna_lnc |
| 33998 hsa-mir-425 | AP001273.1 | 0.367792689 mirna_lnc |
| 33999 hsa-mir-425 | AC008507.2 | 0.395302938 mirna_lnc |
| 34000 hsa-mir-425 | AL118511.1 | 0.377646188 mirna_lnc |
| 34001 hsa-mir-425 | AC004925.1 | 0.30933579 mirna_lnc  |
| 34002 hsa-mir-425 | AP003392.3 | 0.437172902 mirna_lnc |
| 34003 hsa-mir-425 | AL133351.1 | 0.314114611 mirna_lnc |
| 34004 hsa-mir-425 | AC010894.5 | 0.330276613 mirna_lnc |
| 34005 hsa-mir-425 | AL031775.1 | 0.314967517 mirna_lnc |
| 34006 hsa-mir-425 | AC017100.1 | 0.301711054 mirna_lnc |
| 34007 hsa-mir-425 | AC074135.1 | 0.321681037 mirna_lnc |
| 34008 hsa-mir-425 | AC005006.1 | 0.546460408 mirna_lnc |
| 34009 hsa-mir-425 | AL353726.2 | 0.309825251 mirna_lnc |
| 34010 hsa-mir-425 | AC133961.1 | 0.542073522 mirna_lnc |
| 34011 hsa-mir-425 | AC011933.3 | 0.334008922 mirna_lnc |
| 34012 hsa-mir-425 | LINC00543  | 0.308939459 mirna_lnc |
| 34013 hsa-mir-425 | AL161725.2 | 0.379152177 mirna_lnc |
| 34014 hsa-mir-425 | AL031673.1 | 0.312376804 mirna_lnc |
| 34015 hsa-mir-425 | LINC02575  | 0.422456081 mirna_lnc |
| 34016 hsa-mir-425 | AC061975.7 | 0.30986756 mirna_lnc  |
| 34017 hsa-mir-425 | AC005391.1 | 0.367173014 mirna_lnc |
| 34018 hsa-mir-425 | AC010536.3 | 0.34833339 mirna_lnc  |
| 34019 hsa-mir-425 | AC023024.2 | 0.323288438 mirna_lnc |

|                   |             |                        |
|-------------------|-------------|------------------------|
| 34020 hsa-mir-425 | AC004593. 1 | 0. 369087334 mirna_lnc |
| 34021 hsa-mir-425 | CRTC3-AS1   | 0. 378644437 mirna_lnc |
| 34022 hsa-mir-425 | LINC02313   | 0. 326301097 mirna_lnc |
| 34023 hsa-mir-425 | TSPEAR-AS1  | 0. 305000317 mirna_lnc |
| 34024 hsa-mir-425 | AC118758. 3 | 0. 411915683 mirna_lnc |
| 34025 hsa-mir-425 | AC124045. 1 | 0. 331123069 mirna_lnc |
| 34026 hsa-mir-425 | AL158211. 4 | 0. 306449619 mirna_lnc |
| 34027 hsa-mir-425 | AP001972. 4 | 0. 379892491 mirna_lnc |
| 34028 hsa-mir-425 | AL356740. 3 | 0. 318899288 mirna_lnc |
| 34029 hsa-mir-425 | AC023024. 1 | 0. 326477117 mirna_lnc |
| 34030 hsa-mir-425 | AC012467. 2 | 0. 447499184 mirna_lnc |
| 34031 hsa-mir-425 | AP001476. 1 | 0. 421952838 mirna_lnc |
| 34032 hsa-mir-425 | AC007608. 4 | 0. 301011137 mirna_lnc |
| 34033 hsa-mir-425 | AL080317. 1 | 0. 363326634 mirna_lnc |
| 34034 hsa-mir-425 | AP001626. 1 | 0. 375639062 mirna_lnc |
| 34035 hsa-mir-425 | AP001922. 6 | 0. 321023991 mirna_lnc |
| 34036 hsa-mir-425 | BSN-DT      | 0. 35012553 mirna_lnc  |
| 34037 hsa-mir-425 | AC099684. 2 | 0. 347792024 mirna_lnc |
| 34038 hsa-mir-425 | AL356740. 2 | 0. 414493261 mirna_lnc |
| 34039 hsa-mir-92b | AC103746. 1 | 0. 395825024 mirna_lnc |
| 34040 hsa-mir-92b | AC012073. 1 | 0. 314106727 mirna_lnc |
| 34041 hsa-mir-92b | AC069544. 1 | 0. 302773688 mirna_lnc |
| 34042 hsa-mir-92b | LINC01560   | 0. 33276636 mirna_lnc  |
| 34043 hsa-mir-92b | LINC01625   | 0. 38180914 mirna_lnc  |
| 34044 hsa-mir-92b | MIR181A1HG  | 0. 378084518 mirna_lnc |
| 34045 hsa-mir-92b | DDX11-AS1   | 0. 377032441 mirna_lnc |
| 34046 hsa-mir-92b | AP000873. 3 | 0. 331484749 mirna_lnc |
| 34047 hsa-mir-92b | SCAT2       | 0. 339701035 mirna_lnc |
| 34048 hsa-mir-92b | HOXC-AS2    | 0. 311142622 mirna_lnc |
| 34049 hsa-mir-92b | TFAP2A-AS1  | 0. 349763576 mirna_lnc |
| 34050 hsa-mir-92b | AC096637. 2 | 0. 397059624 mirna_lnc |
| 34051 hsa-mir-92b | AC022387. 1 | 0. 423332322 mirna_lnc |
| 34052 hsa-mir-92b | AC002066. 1 | 0. 423206365 mirna_lnc |
| 34053 hsa-mir-92b | ASH1L-AS1   | 0. 343654253 mirna_lnc |
| 34054 hsa-mir-92b | AL139288. 1 | 0. 301561915 mirna_lnc |
| 34055 hsa-mir-92b | AC104667. 1 | 0. 376885634 mirna_lnc |
| 34056 hsa-mir-92b | AC092803. 2 | 0. 383927913 mirna_lnc |
| 34057 hsa-mir-92b | AC147651. 4 | 0. 302988496 mirna_lnc |
| 34058 hsa-mir-92b | STK24-AS1   | 0. 319651467 mirna_lnc |
| 34059 hsa-mir-92b | AL137802. 2 | 0. 432749981 mirna_lnc |
| 34060 hsa-mir-92b | AC091729. 3 | 0. 328594983 mirna_lnc |
| 34061 hsa-mir-92b | AC010913. 1 | 0. 308876222 mirna_lnc |
| 34062 hsa-mir-92b | LINC01096   | 0. 415379716 mirna_lnc |
| 34063 hsa-mir-92b | AP000553. 2 | 0. 361553045 mirna_lnc |
| 34064 hsa-mir-92b | MAN1B1-DT   | 0. 306066737 mirna_lnc |
| 34065 hsa-mir-92b | HOXA10-AS   | 0. 3245022 mirna_lnc   |
| 34066 hsa-mir-92b | AL391069. 2 | 0. 367884477 mirna_lnc |
| 34067 hsa-mir-92b | AC116049. 2 | 0. 377723232 mirna_lnc |
| 34068 hsa-mir-92b | SIX3-AS1    | 0. 305601331 mirna_lnc |
| 34069 hsa-mir-92b | LINC01087   | 0. 354398946 mirna_lnc |
| 34070 hsa-mir-92b | AC135803. 1 | 0. 401898815 mirna_lnc |
| 34071 hsa-mir-92b | AC024230. 1 | 0. 333311682 mirna_lnc |
| 34072 hsa-mir-92b | AC138904. 1 | 0. 352735129 mirna_lnc |
| 34073 hsa-mir-92b | AL391152. 1 | 0. 351477856 mirna_lnc |

|                   |             |                       |
|-------------------|-------------|-----------------------|
| 34074 hsa-mir-92b | AL078605.1  | 0.380401371 mirna_lnc |
| 34075 hsa-mir-92b | AC002076.1  | 0.314445442 mirna_lnc |
| 34076 hsa-mir-92b | AC132192.2  | 0.329566727 mirna_lnc |
| 34077 hsa-mir-92b | LINC01686   | 0.375327348 mirna_lnc |
| 34078 hsa-mir-92b | Z95115.1    | 0.444236351 mirna_lnc |
| 34079 hsa-mir-92b | LINC01143   | 0.515276844 mirna_lnc |
| 34080 hsa-mir-92b | AC024361.2  | 0.328615329 mirna_lnc |
| 34081 hsa-mir-92b | AC079145.1  | 0.362868352 mirna_lnc |
| 34082 hsa-mir-92b | AL592494.2  | 0.320256934 mirna_lnc |
| 34083 hsa-mir-92b | CAMTA1-DT   | 0.336590926 mirna_lnc |
| 34084 hsa-mir-92b | AL138762.1  | 0.410303455 mirna_lnc |
| 34085 hsa-mir-92b | AC007996.1  | 0.393003442 mirna_lnc |
| 34086 hsa-mir-92b | AC016708.1  | 0.415842721 mirna_lnc |
| 34087 hsa-mir-92b | AC011297.1  | 0.345782303 mirna_lnc |
| 34088 hsa-mir-92b | AC009506.1  | 0.332694519 mirna_lnc |
| 34089 hsa-mir-92b | AL358472.3  | 0.350109073 mirna_lnc |
| 34090 hsa-mir-92b | AL451085.2  | 0.364556756 mirna_lnc |
| 34091 hsa-mir-92b | AC099786.1  | 0.492186305 mirna_lnc |
| 34092 hsa-mir-92b | AC091153.3  | 0.388066725 mirna_lnc |
| 34093 hsa-mir-92b | AL354892.2  | 0.472212078 mirna_lnc |
| 34094 hsa-mir-92b | AC009088.2  | 0.343640812 mirna_lnc |
| 34095 hsa-mir-92b | AP002360.3  | 0.353199951 mirna_lnc |
| 34096 hsa-mir-92b | AL139289.2  | 0.325628712 mirna_lnc |
| 34097 hsa-mir-92b | AC016205.1  | 0.410487918 mirna_lnc |
| 34098 hsa-mir-92b | AC242842.1  | 0.358367717 mirna_lnc |
| 34099 hsa-mir-92b | AC092171.4  | 0.314509074 mirna_lnc |
| 34100 hsa-mir-92b | RNASEH1-AS1 | 0.366944387 mirna_lnc |
| 34101 hsa-mir-92b | ERICD       | 0.365783522 mirna_lnc |
| 34102 hsa-mir-92b | AL662795.2  | 0.310812153 mirna_lnc |
| 34103 hsa-mir-92b | AC073389.1  | 0.336825501 mirna_lnc |
| 34104 hsa-mir-92b | DNM3-IT1    | 0.492465634 mirna_lnc |
| 34105 hsa-mir-92b | AL451064.1  | 0.397699281 mirna_lnc |
| 34106 hsa-mir-92b | AL161421.1  | 0.367206501 mirna_lnc |
| 34107 hsa-mir-92b | AL645608.4  | 0.330317485 mirna_lnc |
| 34108 hsa-mir-92b | AC008115.1  | 0.330406807 mirna_lnc |
| 34109 hsa-mir-92b | AC007663.3  | 0.338375966 mirna_lnc |
| 34110 hsa-mir-92b | MAP3K2-DT   | 0.466220469 mirna_lnc |
| 34111 hsa-mir-92b | AC010735.1  | 0.348976154 mirna_lnc |
| 34112 hsa-mir-92b | AC007391.1  | 0.453089151 mirna_lnc |
| 34113 hsa-mir-92b | BX649601.1  | 0.415720607 mirna_lnc |
| 34114 hsa-mir-92b | ATP2B1-AS1  | 0.375621215 mirna_lnc |
| 34115 hsa-mir-92b | AP000255.1  | 0.412551944 mirna_lnc |
| 34116 hsa-mir-92b | AL132765.2  | 0.315500106 mirna_lnc |
| 34117 hsa-mir-92b | AC104072.1  | 0.403549187 mirna_lnc |
| 34118 hsa-mir-92b | AP005329.2  | 0.304911218 mirna_lnc |
| 34119 hsa-mir-92b | AL590705.1  | 0.302204954 mirna_lnc |
| 34120 hsa-mir-92b | KLHL7-DT    | 0.417198415 mirna_lnc |
| 34121 hsa-mir-92b | AC010336.5  | 0.420904659 mirna_lnc |
| 34122 hsa-mir-92b | ERVK9-11    | 0.308612478 mirna_lnc |
| 34123 hsa-mir-92b | AL133215.2  | 0.313867943 mirna_lnc |
| 34124 hsa-mir-92b | AC098936.1  | 0.38456247 mirna_lnc  |
| 34125 hsa-mir-92b | FGF12-AS3   | 0.336317486 mirna_lnc |
| 34126 hsa-mir-92b | AL355490.2  | 0.363107724 mirna_lnc |
| 34127 hsa-mir-92b | SMC2-AS1    | 0.367973074 mirna_lnc |

|                    |             |                        |
|--------------------|-------------|------------------------|
| 34128 hsa-mir-92b  | AC004925. 1 | 0. 307116485 mirna_lnc |
| 34129 hsa-mir-92b  | AP000350. 5 | 0. 422227571 mirna_lnc |
| 34130 hsa-mir-92b  | AC073389. 3 | 0. 445087906 mirna_lnc |
| 34131 hsa-mir-92b  | LINC01970   | 0. 304546879 mirna_lnc |
| 34132 hsa-mir-92b  | GIHCG       | 0. 349999032 mirna_lnc |
| 34133 hsa-mir-92b  | MAPT-IT1    | 0. 327572813 mirna_lnc |
| 34134 hsa-mir-92b  | AL451069. 1 | 0. 308372877 mirna_lnc |
| 34135 hsa-mir-92b  | LINC02470   | 0. 367931583 mirna_lnc |
| 34136 hsa-mir-92b  | AP000350. 7 | 0. 358014411 mirna_lnc |
| 34137 hsa-mir-92b  | AC106820. 4 | 0. 32106521 mirna_lnc  |
| 34138 hsa-mir-92b  | AL138831. 3 | 0. 334500529 mirna_lnc |
| 34139 hsa-mir-92b  | AC026801. 2 | 0. 372518147 mirna_lnc |
| 34140 hsa-mir-92b  | AC017100. 1 | 0. 400623313 mirna_lnc |
| 34141 hsa-mir-92b  | LINC00471   | 0. 317667197 mirna_lnc |
| 34142 hsa-mir-92b  | AL451064. 2 | 0. 353401841 mirna_lnc |
| 34143 hsa-mir-92b  | AL353726. 2 | 0. 389949986 mirna_lnc |
| 34144 hsa-mir-92b  | SPACA6P-AS  | 0. 363675585 mirna_lnc |
| 34145 hsa-mir-92b  | AC104590. 1 | 0. 304323268 mirna_lnc |
| 34146 hsa-mir-92b  | AC025287. 2 | 0. 326244999 mirna_lnc |
| 34147 hsa-mir-92b  | AC007497. 1 | 0. 386798088 mirna_lnc |
| 34148 hsa-mir-92b  | L29074. 1   | 0. 374556958 mirna_lnc |
| 34149 hsa-mir-92b  | AL359504. 2 | 0. 362409366 mirna_lnc |
| 34150 hsa-mir-92b  | AL157931. 1 | 0. 458344474 mirna_lnc |
| 34151 hsa-mir-92b  | AL354919. 1 | 0. 458155069 mirna_lnc |
| 34152 hsa-mir-92b  | AL662791. 1 | 0. 322462743 mirna_lnc |
| 34153 hsa-mir-92b  | AL161729. 4 | 0. 341103658 mirna_lnc |
| 34154 hsa-mir-92b  | AL022341. 2 | 0. 340037678 mirna_lnc |
| 34155 hsa-mir-92b  | AL645608. 2 | 0. 326043365 mirna_lnc |
| 34156 hsa-mir-92b  | AC010735. 2 | 0. 379627261 mirna_lnc |
| 34157 hsa-mir-92b  | AL024498. 1 | 0. 355146312 mirna_lnc |
| 34158 hsa-mir-92b  | AC007663. 4 | 0. 316262946 mirna_lnc |
| 34159 hsa-mir-4326 | LINC01996   | 0. 357859001 mirna_lnc |
| 34160 hsa-mir-4326 | LINC01124   | 0. 35276444 mirna_lnc  |
| 34161 hsa-mir-4326 | AL079305. 1 | 0. 332529727 mirna_lnc |
| 34162 hsa-mir-4326 | SCAT2       | 0. 337756501 mirna_lnc |
| 34163 hsa-mir-4326 | AC106820. 3 | 0. 342074578 mirna_lnc |
| 34164 hsa-mir-4326 | AL117379. 1 | 0. 305013192 mirna_lnc |
| 34165 hsa-mir-4326 | ERVH48-1    | 0. 337909887 mirna_lnc |
| 34166 hsa-mir-4326 | AC079753. 1 | 0. 382266821 mirna_lnc |
| 34167 hsa-mir-4326 | AC131009. 3 | 0. 368069957 mirna_lnc |
| 34168 hsa-mir-4326 | AL356299. 2 | 0. 317292949 mirna_lnc |
| 34169 hsa-mir-4326 | AC107081. 2 | 0. 364460895 mirna_lnc |
| 34170 hsa-mir-4326 | AC079907. 1 | 0. 364194705 mirna_lnc |
| 34171 hsa-mir-4326 | AC104472. 1 | 0. 34652552 mirna_lnc  |
| 34172 hsa-mir-4326 | AL137802. 2 | 0. 333002884 mirna_lnc |
| 34173 hsa-mir-4326 | AL136162. 1 | 0. 308853495 mirna_lnc |
| 34174 hsa-mir-4326 | AC005041. 3 | 0. 417004204 mirna_lnc |
| 34175 hsa-mir-4326 | AC012360. 3 | 0. 34256539 mirna_lnc  |
| 34176 hsa-mir-4326 | AC108673. 2 | 0. 344863636 mirna_lnc |
| 34177 hsa-mir-4326 | AL121832. 3 | 0. 309931901 mirna_lnc |
| 34178 hsa-mir-4326 | AC004943. 1 | 0. 348101622 mirna_lnc |
| 34179 hsa-mir-4326 | LINC00837   | 0. 343152535 mirna_lnc |
| 34180 hsa-mir-4326 | LINC01254   | 0. 368888686 mirna_lnc |
| 34181 hsa-mir-4326 | AC099560. 1 | 0. 33094267 mirna_lnc  |

|                    |            |                       |
|--------------------|------------|-----------------------|
| 34182 hsa-mir-4326 | AL078605.1 | 0.370299122 mirna_lnc |
| 34183 hsa-mir-4326 | AC080080.1 | 0.329304272 mirna_lnc |
| 34184 hsa-mir-4326 | AC097359.2 | 0.33709047 mirna_lnc  |
| 34185 hsa-mir-4326 | AC130650.2 | 0.310402467 mirna_lnc |
| 34186 hsa-mir-4326 | AL592071.1 | 0.35099012 mirna_lnc  |
| 34187 hsa-mir-4326 | KCNQ10T1   | 0.396310881 mirna_lnc |
| 34188 hsa-mir-4326 | LINC02637  | 0.406387303 mirna_lnc |
| 34189 hsa-mir-4326 | HECW2-AS1  | 0.375683137 mirna_lnc |
| 34190 hsa-mir-4326 | AC004943.3 | 0.357801835 mirna_lnc |
| 34191 hsa-mir-4326 | ZBTB46-AS1 | 0.340314975 mirna_lnc |
| 34192 hsa-mir-4326 | AC010719.1 | 0.327583535 mirna_lnc |
| 34193 hsa-mir-4326 | STPG3-AS1  | 0.325291769 mirna_lnc |
| 34194 hsa-mir-4326 | AL096828.3 | 0.324837096 mirna_lnc |
| 34195 hsa-mir-4326 | AC008735.2 | 0.33339783 mirna_lnc  |
| 34196 hsa-mir-4326 | AC245100.7 | 0.339335828 mirna_lnc |
| 34197 hsa-mir-4326 | AC007773.1 | 0.441304874 mirna_lnc |
| 34198 hsa-mir-4326 | AC108860.2 | 0.300749103 mirna_lnc |
| 34199 hsa-mir-4326 | AC131235.3 | 0.349813018 mirna_lnc |
| 34200 hsa-mir-4326 | AC007683.2 | 0.391465508 mirna_lnc |
| 34201 hsa-mir-4326 | AP005328.2 | 0.304097684 mirna_lnc |
| 34202 hsa-mir-4326 | AC135782.1 | 0.309415785 mirna_lnc |
| 34203 hsa-mir-4326 | AL355488.1 | 0.321659367 mirna_lnc |
| 34204 hsa-mir-4326 | AL359697.1 | 0.340873917 mirna_lnc |
| 34205 hsa-mir-4326 | AC011445.1 | 0.301246441 mirna_lnc |
| 34206 hsa-mir-4326 | MDC1-AS1   | 0.309278519 mirna_lnc |
| 34207 hsa-mir-4326 | LINC01756  | 0.302232082 mirna_lnc |
| 34208 hsa-mir-4326 | AL391832.1 | 0.325429137 mirna_lnc |
| 34209 hsa-mir-4326 | AP003086.2 | 0.31179367 mirna_lnc  |
| 34210 hsa-mir-4326 | AC055713.1 | 0.365957156 mirna_lnc |
| 34211 hsa-mir-4326 | AC017074.1 | 0.336021566 mirna_lnc |
| 34212 hsa-mir-4326 | AC090541.1 | 0.300975118 mirna_lnc |
| 34213 hsa-mir-4326 | LINC02404  | 0.359501285 mirna_lnc |
| 34214 hsa-mir-4326 | AC025034.1 | 0.301517268 mirna_lnc |
| 34215 hsa-mir-4326 | AL133215.2 | 0.340411715 mirna_lnc |
| 34216 hsa-mir-4326 | AL139397.1 | 0.31275173 mirna_lnc  |
| 34217 hsa-mir-4326 | AL356488.3 | 0.33489086 mirna_lnc  |
| 34218 hsa-mir-4326 | LINC02413  | 0.307339486 mirna_lnc |
| 34219 hsa-mir-4326 | AL359881.2 | 0.433941394 mirna_lnc |
| 34220 hsa-mir-4326 | AC073389.3 | 0.324187908 mirna_lnc |
| 34221 hsa-mir-4326 | AC245014.3 | 0.310878138 mirna_lnc |
| 34222 hsa-mir-4326 | AC025580.3 | 0.300007355 mirna_lnc |
| 34223 hsa-mir-4326 | AC007608.2 | 0.311129194 mirna_lnc |
| 34224 hsa-mir-4326 | CU639417.5 | 0.334086467 mirna_lnc |
| 34225 hsa-mir-4326 | LINC02475  | 0.361155689 mirna_lnc |
| 34226 hsa-mir-4326 | LIX1-AS1   | 0.350355343 mirna_lnc |
| 34227 hsa-mir-4326 | AL359881.1 | 0.400734136 mirna_lnc |
| 34228 hsa-mir-4326 | AF064858.2 | 0.333098026 mirna_lnc |
| 34229 hsa-mir-4326 | AC125603.2 | 0.368002892 mirna_lnc |
| 34230 hsa-mir-4326 | AC080129.2 | 0.303651642 mirna_lnc |
| 34231 hsa-mir-4326 | FAM41C     | 0.369211375 mirna_lnc |
| 34232 hsa-mir-4326 | RN7SL832P  | 0.319658316 mirna_lnc |
| 34233 hsa-mir-4326 | AL133255.1 | 0.315790166 mirna_lnc |
| 34234 hsa-mir-4326 | AC068987.1 | 0.316596344 mirna_lnc |
| 34235 hsa-mir-4326 | AL158211.1 | 0.398720839 mirna_lnc |

|       |              |            |             |           |
|-------|--------------|------------|-------------|-----------|
| 34236 | hsa-mir-4326 | LINC02526  | 0.343896607 | mirna_lnc |
| 34237 | hsa-mir-4326 | AL590729.1 | 0.307400416 | mirna_lnc |
| 34238 | hsa-mir-4326 | AC107294.3 | 0.331265952 | mirna_lnc |
| 34239 | hsa-mir-4326 | AL138921.1 | 0.309323426 | mirna_lnc |
| 34240 | hsa-mir-4326 | AL158211.5 | 0.370762303 | mirna_lnc |
| 34241 | hsa-mir-1248 | AC103746.1 | 0.604727925 | mirna_lnc |
| 34242 | hsa-mir-1248 | AC129492.5 | 0.324584776 | mirna_lnc |
| 34243 | hsa-mir-1248 | LINC02593  | 0.498221917 | mirna_lnc |
| 34244 | hsa-mir-1248 | AC022031.1 | 0.351980426 | mirna_lnc |
| 34245 | hsa-mir-1248 | LINC01625  | 0.582435687 | mirna_lnc |
| 34246 | hsa-mir-1248 | AC012409.2 | 0.347592835 | mirna_lnc |
| 34247 | hsa-mir-1248 | SCAT2      | 0.321533473 | mirna_lnc |
| 34248 | hsa-mir-1248 | TFAP2A-AS1 | 0.383960902 | mirna_lnc |
| 34249 | hsa-mir-1248 | AC022387.1 | 0.427418158 | mirna_lnc |
| 34250 | hsa-mir-1248 | AC002066.1 | 0.407398555 | mirna_lnc |
| 34251 | hsa-mir-1248 | AL139288.1 | 0.363051724 | mirna_lnc |
| 34252 | hsa-mir-1248 | AC104667.1 | 0.362050589 | mirna_lnc |
| 34253 | hsa-mir-1248 | AC025171.1 | 0.326028871 | mirna_lnc |
| 34254 | hsa-mir-1248 | AL596247.1 | 0.313743146 | mirna_lnc |
| 34255 | hsa-mir-1248 | AC091814.1 | 0.310727009 | mirna_lnc |
| 34256 | hsa-mir-1248 | AL137802.2 | 0.438523167 | mirna_lnc |
| 34257 | hsa-mir-1248 | LINC02160  | 0.316979502 | mirna_lnc |
| 34258 | hsa-mir-1248 | AC093642.2 | 0.499318761 | mirna_lnc |
| 34259 | hsa-mir-1248 | AL157823.2 | 0.359273548 | mirna_lnc |
| 34260 | hsa-mir-1248 | AP000553.2 | 0.543752554 | mirna_lnc |
| 34261 | hsa-mir-1248 | LINC02175  | 0.311386067 | mirna_lnc |
| 34262 | hsa-mir-1248 | SIX3-AS1   | 0.346084742 | mirna_lnc |
| 34263 | hsa-mir-1248 | AC110813.1 | 0.564089634 | mirna_lnc |
| 34264 | hsa-mir-1248 | LINC01087  | 0.491275441 | mirna_lnc |
| 34265 | hsa-mir-1248 | AC135803.1 | 0.574500439 | mirna_lnc |
| 34266 | hsa-mir-1248 | AL391152.1 | 0.349132562 | mirna_lnc |
| 34267 | hsa-mir-1248 | MAGEA4-AS1 | 0.32100717  | mirna_lnc |
| 34268 | hsa-mir-1248 | AC105339.5 | 0.35034547  | mirna_lnc |
| 34269 | hsa-mir-1248 | AC090578.2 | 0.629201641 | mirna_lnc |
| 34270 | hsa-mir-1248 | LINC01518  | 0.318380026 | mirna_lnc |
| 34271 | hsa-mir-1248 | AL078605.1 | 0.458541316 | mirna_lnc |
| 34272 | hsa-mir-1248 | AL603839.1 | 0.346978198 | mirna_lnc |
| 34273 | hsa-mir-1248 | AL157838.1 | 0.414316461 | mirna_lnc |
| 34274 | hsa-mir-1248 | Z95115.1   | 0.368494204 | mirna_lnc |
| 34275 | hsa-mir-1248 | LINC01143  | 0.392754698 | mirna_lnc |
| 34276 | hsa-mir-1248 | AC004884.2 | 0.324219556 | mirna_lnc |
| 34277 | hsa-mir-1248 | AC020907.5 | 0.404555845 | mirna_lnc |
| 34278 | hsa-mir-1248 | UBR5-AS1   | 0.359950949 | mirna_lnc |
| 34279 | hsa-mir-1248 | AC130650.2 | 0.513296809 | mirna_lnc |
| 34280 | hsa-mir-1248 | AL157400.3 | 0.318337458 | mirna_lnc |
| 34281 | hsa-mir-1248 | AL157400.4 | 0.385403628 | mirna_lnc |
| 34282 | hsa-mir-1248 | AC007996.1 | 0.477786054 | mirna_lnc |
| 34283 | hsa-mir-1248 | AC009318.3 | 0.317970415 | mirna_lnc |
| 34284 | hsa-mir-1248 | AP003696.1 | 0.301705835 | mirna_lnc |
| 34285 | hsa-mir-1248 | AC016708.1 | 0.626436025 | mirna_lnc |
| 34286 | hsa-mir-1248 | AC091057.2 | 0.32274324  | mirna_lnc |
| 34287 | hsa-mir-1248 | AC099786.1 | 0.5993277   | mirna_lnc |
| 34288 | hsa-mir-1248 | AL513365.2 | 0.353659453 | mirna_lnc |
| 34289 | hsa-mir-1248 | AC016205.1 | 0.309285143 | mirna_lnc |

|                    |            |                       |
|--------------------|------------|-----------------------|
| 34290 hsa-mir-1248 | AC109326.1 | 0.329714332 mirna_lnc |
| 34291 hsa-mir-1248 | AC023034.2 | 0.345225312 mirna_lnc |
| 34292 hsa-mir-1248 | ERICD      | 0.353080427 mirna_lnc |
| 34293 hsa-mir-1248 | AL662795.2 | 0.338971983 mirna_lnc |
| 34294 hsa-mir-1248 | AC006262.1 | 0.325142057 mirna_lnc |
| 34295 hsa-mir-1248 | AL161908.1 | 0.368301515 mirna_lnc |
| 34296 hsa-mir-1248 | AC092608.1 | 0.354710947 mirna_lnc |
| 34297 hsa-mir-1248 | AL136040.1 | 0.307232715 mirna_lnc |
| 34298 hsa-mir-1248 | AC025171.4 | 0.315840659 mirna_lnc |
| 34299 hsa-mir-1248 | AC073389.1 | 0.335995764 mirna_lnc |
| 34300 hsa-mir-1248 | DNM3-IT1   | 0.549056211 mirna_lnc |
| 34301 hsa-mir-1248 | AL451064.1 | 0.594860298 mirna_lnc |
| 34302 hsa-mir-1248 | AL645608.4 | 0.582707158 mirna_lnc |
| 34303 hsa-mir-1248 | AF230666.2 | 0.315195477 mirna_lnc |
| 34304 hsa-mir-1248 | AP001029.1 | 0.384806523 mirna_lnc |
| 34305 hsa-mir-1248 | AC007663.3 | 0.450473255 mirna_lnc |
| 34306 hsa-mir-1248 | AC009318.2 | 0.402932417 mirna_lnc |
| 34307 hsa-mir-1248 | AL138831.1 | 0.357422371 mirna_lnc |
| 34308 hsa-mir-1248 | AP001178.3 | 0.300399299 mirna_lnc |
| 34309 hsa-mir-1248 | AC010735.1 | 0.632654832 mirna_lnc |
| 34310 hsa-mir-1248 | AC079600.3 | 0.348245934 mirna_lnc |
| 34311 hsa-mir-1248 | AL022324.3 | 0.418081546 mirna_lnc |
| 34312 hsa-mir-1248 | AC105118.1 | 0.318622861 mirna_lnc |
| 34313 hsa-mir-1248 | LINC01238  | 0.41972546 mirna_lnc  |
| 34314 hsa-mir-1248 | ATP2B1-AS1 | 0.44145007 mirna_lnc  |
| 34315 hsa-mir-1248 | AP001029.2 | 0.306935576 mirna_lnc |
| 34316 hsa-mir-1248 | AP000255.1 | 0.543980797 mirna_lnc |
| 34317 hsa-mir-1248 | AC104072.1 | 0.601210352 mirna_lnc |
| 34318 hsa-mir-1248 | AP001033.2 | 0.332621797 mirna_lnc |
| 34319 hsa-mir-1248 | AC010336.2 | 0.349643685 mirna_lnc |
| 34320 hsa-mir-1248 | AC010168.2 | 0.396114016 mirna_lnc |
| 34321 hsa-mir-1248 | AL031658.1 | 0.377441737 mirna_lnc |
| 34322 hsa-mir-1248 | AC010997.4 | 0.33008416 mirna_lnc  |
| 34323 hsa-mir-1248 | AC104819.3 | 0.50267791 mirna_lnc  |
| 34324 hsa-mir-1248 | TTC39C-AS1 | 0.409502812 mirna_lnc |
| 34325 hsa-mir-1248 | AL049775.1 | 0.362287785 mirna_lnc |
| 34326 hsa-mir-1248 | AC092447.5 | 0.43341908 mirna_lnc  |
| 34327 hsa-mir-1248 | AL136980.1 | 0.302001241 mirna_lnc |
| 34328 hsa-mir-1248 | AC010336.5 | 0.496540761 mirna_lnc |
| 34329 hsa-mir-1248 | AC107464.3 | 0.383045893 mirna_lnc |
| 34330 hsa-mir-1248 | LINC01901  | 0.494499416 mirna_lnc |
| 34331 hsa-mir-1248 | AC107021.1 | 0.349262011 mirna_lnc |
| 34332 hsa-mir-1248 | AC107032.2 | 0.345429346 mirna_lnc |
| 34333 hsa-mir-1248 | AL158063.1 | 0.36533474 mirna_lnc  |
| 34334 hsa-mir-1248 | AC132219.1 | 0.411461949 mirna_lnc |
| 34335 hsa-mir-1248 | AL139397.1 | 0.303876047 mirna_lnc |
| 34336 hsa-mir-1248 | AC013356.2 | 0.309630464 mirna_lnc |
| 34337 hsa-mir-1248 | AC244517.1 | 0.330476391 mirna_lnc |
| 34338 hsa-mir-1248 | AL008721.1 | 0.328093166 mirna_lnc |
| 34339 hsa-mir-1248 | AF127577.5 | 0.413688034 mirna_lnc |
| 34340 hsa-mir-1248 | FGF12-AS3  | 0.371040382 mirna_lnc |
| 34341 hsa-mir-1248 | AL355490.2 | 0.366073699 mirna_lnc |
| 34342 hsa-mir-1248 | NUCB1-AS1  | 0.349375071 mirna_lnc |
| 34343 hsa-mir-1248 | SMC2-AS1   | 0.479434325 mirna_lnc |



|                    |             |                        |
|--------------------|-------------|------------------------|
| 34344 hsa-mir-1248 | AC107021. 2 | 0. 329552624 mirna_lnc |
| 34345 hsa-mir-1248 | AC107068. 1 | 0. 305848062 mirna_lnc |
| 34346 hsa-mir-1248 | MANEA-DT    | 0. 359581912 mirna_lnc |
| 34347 hsa-mir-1248 | AC010343. 3 | 0. 321292031 mirna_lnc |
| 34348 hsa-mir-1248 | MAGEA8-AS1  | 0. 453348889 mirna_lnc |
| 34349 hsa-mir-1248 | AC004925. 1 | 0. 432113748 mirna_lnc |
| 34350 hsa-mir-1248 | Z99129. 3   | 0. 339049936 mirna_lnc |
| 34351 hsa-mir-1248 | AP000350. 5 | 0. 5714794 mirna_lnc   |
| 34352 hsa-mir-1248 | AC073389. 3 | 0. 460945767 mirna_lnc |
| 34353 hsa-mir-1248 | MAPT-IT1    | 0. 473276339 mirna_lnc |
| 34354 hsa-mir-1248 | AC087241. 4 | 0. 332039327 mirna_lnc |
| 34355 hsa-mir-1248 | U91328. 3   | 0. 329528025 mirna_lnc |
| 34356 hsa-mir-1248 | AP000350. 7 | 0. 462862095 mirna_lnc |
| 34357 hsa-mir-1248 | AL096701. 3 | 0. 302286292 mirna_lnc |
| 34358 hsa-mir-1248 | AP002364. 1 | 0. 308878596 mirna_lnc |
| 34359 hsa-mir-1248 | AL645940. 1 | 0. 304242203 mirna_lnc |
| 34360 hsa-mir-1248 | AL138831. 3 | 0. 380385274 mirna_lnc |
| 34361 hsa-mir-1248 | AL138831. 2 | 0. 417175884 mirna_lnc |
| 34362 hsa-mir-1248 | AC005006. 1 | 0. 344826539 mirna_lnc |
| 34363 hsa-mir-1248 | AL645608. 6 | 0. 493577957 mirna_lnc |
| 34364 hsa-mir-1248 | AL451064. 2 | 0. 563021148 mirna_lnc |
| 34365 hsa-mir-1248 | AL353726. 2 | 0. 449996707 mirna_lnc |
| 34366 hsa-mir-1248 | SPACA6P-AS  | 0. 515813684 mirna_lnc |
| 34367 hsa-mir-1248 | AC068790. 5 | 0. 355641133 mirna_lnc |
| 34368 hsa-mir-1248 | AC090061. 1 | 0. 395580604 mirna_lnc |
| 34369 hsa-mir-1248 | LINC02652   | 0. 300777381 mirna_lnc |
| 34370 hsa-mir-1248 | AL137003. 2 | 0. 423534995 mirna_lnc |
| 34371 hsa-mir-1248 | L29074. 1   | 0. 453200536 mirna_lnc |
| 34372 hsa-mir-1248 | FAM160A1-DT | 0. 467876332 mirna_lnc |
| 34373 hsa-mir-1248 | AL031775. 2 | 0. 411532578 mirna_lnc |
| 34374 hsa-mir-1248 | AL359541. 1 | 0. 403439449 mirna_lnc |
| 34375 hsa-mir-1248 | AL157931. 1 | 0. 658835819 mirna_lnc |
| 34376 hsa-mir-1248 | AL133255. 1 | 0. 441241006 mirna_lnc |
| 34377 hsa-mir-1248 | AL354919. 1 | 0. 641762901 mirna_lnc |
| 34378 hsa-mir-1248 | AL662791. 1 | 0. 331187054 mirna_lnc |
| 34379 hsa-mir-1248 | AC009084. 2 | 0. 302020422 mirna_lnc |
| 34380 hsa-mir-1248 | AL135791. 1 | 0. 318060864 mirna_lnc |
| 34381 hsa-mir-1248 | AL161729. 4 | 0. 331844669 mirna_lnc |
| 34382 hsa-mir-1248 | AL022341. 2 | 0. 354127522 mirna_lnc |
| 34383 hsa-mir-1248 | AC083843. 2 | 0. 318767626 mirna_lnc |
| 34384 hsa-mir-1248 | AL645608. 2 | 0. 529525121 mirna_lnc |
| 34385 hsa-mir-1248 | AC010735. 2 | 0. 553065421 mirna_lnc |
| 34386 hsa-mir-1248 | AL024498. 1 | 0. 46145202 mirna_lnc  |
| 34387 hsa-mir-1248 | AC007663. 4 | 0. 369242159 mirna_lnc |
| 34388 hsa-mir-1248 | AC087683. 2 | 0. 308077147 mirna_lnc |
| 34389 hsa-mir-1248 | AL138921. 1 | 0. 305186669 mirna_lnc |
| 34390 hsa-mir-1248 | AC137767. 1 | 0. 381293524 mirna_lnc |
| 34391 hsa-mir-454  | AC012073. 1 | 0. 347404708 mirna_lnc |
| 34392 hsa-mir-454  | AP000708. 1 | 0. 316559109 mirna_lnc |
| 34393 hsa-mir-454  | TMPO-AS1    | 0. 361922018 mirna_lnc |
| 34394 hsa-mir-454  | AP002449. 1 | 0. 325618061 mirna_lnc |
| 34395 hsa-mir-454  | AC004241. 3 | 0. 31515631 mirna_lnc  |
| 34396 hsa-mir-454  | CEP83-DT    | 0. 373277378 mirna_lnc |
| 34397 hsa-mir-454  | AC106820. 3 | 0. 300610139 mirna_lnc |

|                   |            |                       |
|-------------------|------------|-----------------------|
| 34398 hsa-mir-454 | AC008434.1 | 0.323431156 mirna_lnc |
| 34399 hsa-mir-454 | AC074117.1 | 0.305977731 mirna_lnc |
| 34400 hsa-mir-454 | AC004943.2 | 0.334396988 mirna_lnc |
| 34401 hsa-mir-454 | AC025176.1 | 0.372032072 mirna_lnc |
| 34402 hsa-mir-454 | AC009121.2 | 0.312021711 mirna_lnc |
| 34403 hsa-mir-454 | LINC01494  | 0.313490948 mirna_lnc |
| 34404 hsa-mir-454 | AC090159.1 | 0.330457038 mirna_lnc |
| 34405 hsa-mir-454 | AC017083.1 | 0.335629487 mirna_lnc |
| 34406 hsa-mir-454 | AC009121.1 | 0.312312019 mirna_lnc |
| 34407 hsa-mir-454 | AC024940.6 | 0.359454831 mirna_lnc |
| 34408 hsa-mir-454 | AC104472.1 | 0.325055811 mirna_lnc |
| 34409 hsa-mir-454 | AC087289.3 | 0.33555247 mirna_lnc  |
| 34410 hsa-mir-454 | AC073857.1 | 0.313152041 mirna_lnc |
| 34411 hsa-mir-454 | LINC02367  | 0.307380318 mirna_lnc |
| 34412 hsa-mir-454 | AC005041.3 | 0.313710173 mirna_lnc |
| 34413 hsa-mir-454 | AC004920.1 | 0.325599927 mirna_lnc |
| 34414 hsa-mir-454 | AC021683.3 | 0.314244342 mirna_lnc |
| 34415 hsa-mir-454 | AC012360.3 | 0.300097223 mirna_lnc |
| 34416 hsa-mir-454 | AC109992.2 | 0.343191868 mirna_lnc |
| 34417 hsa-mir-454 | AC024884.2 | 0.303888319 mirna_lnc |
| 34418 hsa-mir-454 | AC008543.1 | 0.329130249 mirna_lnc |
| 34419 hsa-mir-454 | LINC01424  | 0.314666934 mirna_lnc |
| 34420 hsa-mir-454 | TBC1D8-AS1 | 0.339938752 mirna_lnc |
| 34421 hsa-mir-454 | AL163051.1 | 0.301541084 mirna_lnc |
| 34422 hsa-mir-454 | AL513327.2 | 0.304322706 mirna_lnc |
| 34423 hsa-mir-454 | AC004943.1 | 0.314737006 mirna_lnc |
| 34424 hsa-mir-454 | LINC01850  | 0.32323987 mirna_lnc  |
| 34425 hsa-mir-454 | AC002550.1 | 0.304215508 mirna_lnc |
| 34426 hsa-mir-454 | AC020612.3 | 0.301211268 mirna_lnc |
| 34427 hsa-mir-454 | AL391069.3 | 0.322813319 mirna_lnc |
| 34428 hsa-mir-454 | LINC02607  | 0.341862538 mirna_lnc |
| 34429 hsa-mir-454 | WASIR2     | 0.340067878 mirna_lnc |
| 34430 hsa-mir-454 | LINC01816  | 0.322983256 mirna_lnc |
| 34431 hsa-mir-454 | SREBF2-AS1 | 0.438034178 mirna_lnc |
| 34432 hsa-mir-454 | AC022098.3 | 0.304710364 mirna_lnc |
| 34433 hsa-mir-454 | AC127024.5 | 0.318574469 mirna_lnc |
| 34434 hsa-mir-454 | AC004943.3 | 0.365063909 mirna_lnc |
| 34435 hsa-mir-454 | AC046143.2 | 0.311284244 mirna_lnc |
| 34436 hsa-mir-454 | AC145343.1 | 0.320462464 mirna_lnc |
| 34437 hsa-mir-454 | AC117382.2 | 0.385994845 mirna_lnc |
| 34438 hsa-mir-454 | AC015802.5 | 0.323978686 mirna_lnc |
| 34439 hsa-mir-454 | AC025766.1 | 0.306214458 mirna_lnc |
| 34440 hsa-mir-454 | AC011290.1 | 0.302546384 mirna_lnc |
| 34441 hsa-mir-454 | AC090527.3 | 0.31402584 mirna_lnc  |
| 34442 hsa-mir-454 | AC005379.1 | 0.343489115 mirna_lnc |
| 34443 hsa-mir-454 | AC092669.1 | 0.326876284 mirna_lnc |
| 34444 hsa-mir-454 | AC084757.2 | 0.367667982 mirna_lnc |
| 34445 hsa-mir-454 | AC011773.1 | 0.309730241 mirna_lnc |
| 34446 hsa-mir-454 | STAM-AS1   | 0.301820384 mirna_lnc |
| 34447 hsa-mir-454 | AC092849.2 | 0.32410638 mirna_lnc  |
| 34448 hsa-mir-454 | AC105339.2 | 0.305468981 mirna_lnc |
| 34449 hsa-mir-454 | AC097641.1 | 0.307949893 mirna_lnc |
| 34450 hsa-mir-454 | AC107214.1 | 0.340919288 mirna_lnc |
| 34451 hsa-mir-454 | LINC02204  | 0.30660308 mirna_lnc  |

|                   |             |                       |
|-------------------|-------------|-----------------------|
| 34452 hsa-mir-454 | AC131235.3  | 0.335596439 mirna_lnc |
| 34453 hsa-mir-454 | AC011921.1  | 0.358833576 mirna_lnc |
| 34454 hsa-mir-454 | AC073896.4  | 0.351610943 mirna_lnc |
| 34455 hsa-mir-454 | AC011446.1  | 0.350396922 mirna_lnc |
| 34456 hsa-mir-454 | AL355488.1  | 0.327762003 mirna_lnc |
| 34457 hsa-mir-454 | AC096992.2  | 0.388909098 mirna_lnc |
| 34458 hsa-mir-454 | AL603832.1  | 0.416157208 mirna_lnc |
| 34459 hsa-mir-454 | LPP-AS2     | 0.31542334 mirna_lnc  |
| 34460 hsa-mir-454 | ELDR        | 0.348900805 mirna_lnc |
| 34461 hsa-mir-454 | AP003086.2  | 0.344219451 mirna_lnc |
| 34462 hsa-mir-454 | AL606760.3  | 0.303770107 mirna_lnc |
| 34463 hsa-mir-454 | AC055713.1  | 0.300657844 mirna_lnc |
| 34464 hsa-mir-454 | AC019226.2  | 0.316863205 mirna_lnc |
| 34465 hsa-mir-454 | AC117395.1  | 0.305163655 mirna_lnc |
| 34466 hsa-mir-454 | AL031186.1  | 0.37899514 mirna_lnc  |
| 34467 hsa-mir-454 | AC064807.4  | 0.325968126 mirna_lnc |
| 34468 hsa-mir-454 | AC009464.1  | 0.312168625 mirna_lnc |
| 34469 hsa-mir-454 | AC073575.2  | 0.316804008 mirna_lnc |
| 34470 hsa-mir-454 | FLJ45513    | 0.354949325 mirna_lnc |
| 34471 hsa-mir-454 | AL356488.3  | 0.339366501 mirna_lnc |
| 34472 hsa-mir-454 | SEMA6A-AS2  | 0.315467764 mirna_lnc |
| 34473 hsa-mir-454 | AC069277.1  | 0.350902037 mirna_lnc |
| 34474 hsa-mir-454 | AL032819.1  | 0.315853595 mirna_lnc |
| 34475 hsa-mir-454 | AC004012.1  | 0.308460632 mirna_lnc |
| 34476 hsa-mir-454 | AP003392.3  | 0.428037463 mirna_lnc |
| 34477 hsa-mir-454 | AL139021.1  | 0.354170118 mirna_lnc |
| 34478 hsa-mir-454 | TPRG1-AS1   | 0.331271649 mirna_lnc |
| 34479 hsa-mir-454 | AC002059.1  | 0.333625243 mirna_lnc |
| 34480 hsa-mir-454 | AC025162.2  | 0.321253032 mirna_lnc |
| 34481 hsa-mir-454 | AC011933.3  | 0.312752881 mirna_lnc |
| 34482 hsa-mir-454 | CYP51A1-AS1 | 0.30607452 mirna_lnc  |
| 34483 hsa-mir-454 | AP001893.3  | 0.319739555 mirna_lnc |
| 34484 hsa-mir-454 | AC007038.2  | 0.332639078 mirna_lnc |
| 34485 hsa-mir-454 | AC139100.2  | 0.316534066 mirna_lnc |
| 34486 hsa-mir-454 | AL049646.1  | 0.311594263 mirna_lnc |
| 34487 hsa-mir-454 | AP001972.4  | 0.32781915 mirna_lnc  |
| 34488 hsa-mir-454 | AC112491.1  | 0.339037868 mirna_lnc |
| 34489 hsa-mir-454 | AL590705.3  | 0.307752564 mirna_lnc |
| 34490 hsa-mir-454 | AC002044.1  | 0.303394578 mirna_lnc |
| 34491 hsa-mir-454 | AC008752.1  | 0.301921332 mirna_lnc |
| 34492 hsa-mir-454 | AC020663.3  | 0.302390139 mirna_lnc |
| 34493 hsa-mir-454 | AC099684.2  | 0.360128668 mirna_lnc |
| 34494 hsa-mir-766 | TMPO-AS1    | 0.397998784 mirna_lnc |
| 34495 hsa-mir-766 | AL117332.1  | 0.316410965 mirna_lnc |
| 34496 hsa-mir-766 | HOXC-AS2    | 0.322177929 mirna_lnc |
| 34497 hsa-mir-766 | AC124303.1  | 0.318314016 mirna_lnc |
| 34498 hsa-mir-766 | AC079209.1  | 0.339494984 mirna_lnc |
| 34499 hsa-mir-766 | AC027117.2  | 0.442192133 mirna_lnc |
| 34500 hsa-mir-766 | LINC01419   | 0.441203153 mirna_lnc |
| 34501 hsa-mir-766 | LINC00567   | 0.373180043 mirna_lnc |
| 34502 hsa-mir-766 | AL133467.2  | 0.347500937 mirna_lnc |
| 34503 hsa-mir-766 | AC021242.3  | 0.343919614 mirna_lnc |
| 34504 hsa-mir-766 | KC877982.1  | 0.367485392 mirna_lnc |
| 34505 hsa-mir-766 | LINC02302   | 0.519966766 mirna_lnc |

|                   |             |                       |
|-------------------|-------------|-----------------------|
| 34506 hsa-mir-766 | UBE2E1-AS1  | 0.3043165 mirna_lnc   |
| 34507 hsa-mir-766 | AC004835.1  | 0.387666609 mirna_lnc |
| 34508 hsa-mir-766 | AC011481.4  | 0.33884093 mirna_lnc  |
| 34509 hsa-mir-766 | AC008543.1  | 0.357196873 mirna_lnc |
| 34510 hsa-mir-766 | AL050341.2  | 0.351404962 mirna_lnc |
| 34511 hsa-mir-766 | AL121578.3  | 0.316448527 mirna_lnc |
| 34512 hsa-mir-766 | AJ239322.1  | 0.52530625 mirna_lnc  |
| 34513 hsa-mir-766 | AL031985.3  | 0.345920679 mirna_lnc |
| 34514 hsa-mir-766 | LINC01424   | 0.339843409 mirna_lnc |
| 34515 hsa-mir-766 | AC026992.2  | 0.422889203 mirna_lnc |
| 34516 hsa-mir-766 | AL358473.1  | 0.399102889 mirna_lnc |
| 34517 hsa-mir-766 | AC096887.2  | 0.304593032 mirna_lnc |
| 34518 hsa-mir-766 | LINC01671   | 0.421188025 mirna_lnc |
| 34519 hsa-mir-766 | AC087273.2  | 0.411594834 mirna_lnc |
| 34520 hsa-mir-766 | AL033527.3  | 0.359607009 mirna_lnc |
| 34521 hsa-mir-766 | AF186192.3  | 0.415563334 mirna_lnc |
| 34522 hsa-mir-766 | AL121721.1  | 0.487509471 mirna_lnc |
| 34523 hsa-mir-766 | AC069148.1  | 0.318233182 mirna_lnc |
| 34524 hsa-mir-766 | AC012603.1  | 0.307963415 mirna_lnc |
| 34525 hsa-mir-766 | AC005379.1  | 0.318870851 mirna_lnc |
| 34526 hsa-mir-766 | AP001065.2  | 0.341513037 mirna_lnc |
| 34527 hsa-mir-766 | AC083900.1  | 0.357938843 mirna_lnc |
| 34528 hsa-mir-766 | AC068987.4  | 0.30395808 mirna_lnc  |
| 34529 hsa-mir-766 | LINC02177   | 0.39323287 mirna_lnc  |
| 34530 hsa-mir-766 | AC002091.1  | 0.341430637 mirna_lnc |
| 34531 hsa-mir-766 | AC090774.2  | 0.40159945 mirna_lnc  |
| 34532 hsa-mir-766 | AL137058.3  | 0.450642212 mirna_lnc |
| 34533 hsa-mir-766 | AP005328.2  | 0.325503797 mirna_lnc |
| 34534 hsa-mir-766 | ZNF385D-AS1 | 0.3577405 mirna_lnc   |
| 34535 hsa-mir-766 | AC023886.1  | 0.374852739 mirna_lnc |
| 34536 hsa-mir-766 | AP003064.2  | 0.332923017 mirna_lnc |
| 34537 hsa-mir-766 | AL603832.1  | 0.323632369 mirna_lnc |
| 34538 hsa-mir-766 | AP006621.5  | 0.350498777 mirna_lnc |
| 34539 hsa-mir-766 | AC023355.1  | 0.333191715 mirna_lnc |
| 34540 hsa-mir-766 | AC007638.2  | 0.461596034 mirna_lnc |
| 34541 hsa-mir-766 | AC090907.2  | 0.344417856 mirna_lnc |
| 34542 hsa-mir-766 | AC011700.1  | 0.36412673 mirna_lnc  |
| 34543 hsa-mir-766 | AC023824.6  | 0.374075176 mirna_lnc |
| 34544 hsa-mir-766 | AL606970.1  | 0.330191908 mirna_lnc |
| 34545 hsa-mir-766 | AL590705.1  | 0.330060085 mirna_lnc |
| 34546 hsa-mir-766 | AC012645.1  | 0.377732266 mirna_lnc |
| 34547 hsa-mir-766 | AC092447.5  | 0.343841057 mirna_lnc |
| 34548 hsa-mir-766 | AC116025.2  | 0.453999667 mirna_lnc |
| 34549 hsa-mir-766 | AL355102.4  | 0.361564497 mirna_lnc |
| 34550 hsa-mir-766 | AL603839.3  | 0.375637125 mirna_lnc |
| 34551 hsa-mir-766 | AC243960.3  | 0.368304752 mirna_lnc |
| 34552 hsa-mir-766 | AC000036.1  | 0.500650547 mirna_lnc |
| 34553 hsa-mir-766 | HCG15       | 0.340050419 mirna_lnc |
| 34554 hsa-mir-766 | AC099667.1  | 0.34990525 mirna_lnc  |
| 34555 hsa-mir-766 | AC002091.2  | 0.309584326 mirna_lnc |
| 34556 hsa-mir-766 | SEMA6A-AS2  | 0.319255019 mirna_lnc |
| 34557 hsa-mir-766 | AC078852.2  | 0.318509269 mirna_lnc |
| 34558 hsa-mir-766 | LINC02365   | 0.55371061 mirna_lnc  |
| 34559 hsa-mir-766 | AC097652.1  | 0.318318107 mirna_lnc |

|                   |             |                       |
|-------------------|-------------|-----------------------|
| 34560 hsa-mir-766 | ESRG        | 0.33590593 mirna_lnc  |
| 34561 hsa-mir-766 | AC125616.1  | 0.35591253 mirna_lnc  |
| 34562 hsa-mir-766 | AC117402.1  | 0.420194845 mirna_lnc |
| 34563 hsa-mir-766 | ZFHX4-AS1   | 0.381960313 mirna_lnc |
| 34564 hsa-mir-766 | AC003070.2  | 0.355198122 mirna_lnc |
| 34565 hsa-mir-766 | AC005336.3  | 0.416411834 mirna_lnc |
| 34566 hsa-mir-766 | AP003392.3  | 0.329434211 mirna_lnc |
| 34567 hsa-mir-766 | AP005205.3  | 0.38432884 mirna_lnc  |
| 34568 hsa-mir-766 | AC010894.5  | 0.369587008 mirna_lnc |
| 34569 hsa-mir-766 | CEBPA-DT    | 0.307691614 mirna_lnc |
| 34570 hsa-mir-766 | AC074135.1  | 0.588292412 mirna_lnc |
| 34571 hsa-mir-766 | SPANXA2-OT1 | 0.394451295 mirna_lnc |
| 34572 hsa-mir-766 | AC005006.1  | 0.319249994 mirna_lnc |
| 34573 hsa-mir-766 | AC133961.1  | 0.356520808 mirna_lnc |
| 34574 hsa-mir-766 | AL133342.1  | 0.35342983 mirna_lnc  |
| 34575 hsa-mir-766 | LINC02575   | 0.386684252 mirna_lnc |
| 34576 hsa-mir-766 | AC118758.3  | 0.494124648 mirna_lnc |
| 34577 hsa-mir-766 | AC068987.1  | 0.311678574 mirna_lnc |
| 34578 hsa-mir-766 | AC061975.6  | 0.392644944 mirna_lnc |
| 34579 hsa-mir-766 | AP001972.4  | 0.323429088 mirna_lnc |
| 34580 hsa-mir-766 | AC008760.2  | 0.3703359 mirna_lnc   |
| 34581 hsa-mir-766 | AL132655.1  | 0.438981466 mirna_lnc |
| 34582 hsa-mir-766 | AP001476.1  | 0.473082383 mirna_lnc |
| 34583 hsa-mir-766 | AP001626.1  | 0.338995479 mirna_lnc |
| 34584 hsa-mir-766 | AC099684.2  | 0.47762516 mirna_lnc  |
| 34585 hsa-mir-197 | AC012073.1  | 0.426900004 mirna_lnc |
| 34586 hsa-mir-197 | TMPO-AS1    | 0.42104915 mirna_lnc  |
| 34587 hsa-mir-197 | AL121832.2  | 0.384668521 mirna_lnc |
| 34588 hsa-mir-197 | AC020658.4  | 0.447289187 mirna_lnc |
| 34589 hsa-mir-197 | AL035461.2  | 0.34196655 mirna_lnc  |
| 34590 hsa-mir-197 | CEP83-DT    | 0.332449493 mirna_lnc |
| 34591 hsa-mir-197 | AC093458.1  | 0.354199692 mirna_lnc |
| 34592 hsa-mir-197 | AC090709.1  | 0.393638313 mirna_lnc |
| 34593 hsa-mir-197 | AC021224.1  | 0.336855551 mirna_lnc |
| 34594 hsa-mir-197 | AL138724.1  | 0.317850906 mirna_lnc |
| 34595 hsa-mir-197 | LINC02367   | 0.330726665 mirna_lnc |
| 34596 hsa-mir-197 | LINC02321   | 0.308770207 mirna_lnc |
| 34597 hsa-mir-197 | AC024884.2  | 0.372240386 mirna_lnc |
| 34598 hsa-mir-197 | AC016705.2  | 0.301393001 mirna_lnc |
| 34599 hsa-mir-197 | AC026740.1  | 0.377837128 mirna_lnc |
| 34600 hsa-mir-197 | AL139023.1  | 0.357215428 mirna_lnc |
| 34601 hsa-mir-197 | AP000696.1  | 0.323786318 mirna_lnc |
| 34602 hsa-mir-197 | AC024230.1  | 0.330503943 mirna_lnc |
| 34603 hsa-mir-197 | AC093458.2  | 0.303980402 mirna_lnc |
| 34604 hsa-mir-197 | AL121832.3  | 0.316870821 mirna_lnc |
| 34605 hsa-mir-197 | AL591846.2  | 0.30105099 mirna_lnc  |
| 34606 hsa-mir-197 | AC131011.1  | 0.523595107 mirna_lnc |
| 34607 hsa-mir-197 | AL162457.2  | 0.424259052 mirna_lnc |
| 34608 hsa-mir-197 | AC104971.1  | 0.37256987 mirna_lnc  |
| 34609 hsa-mir-197 | AC009646.2  | 0.470273424 mirna_lnc |
| 34610 hsa-mir-197 | IGF2-AS     | 0.39097497 mirna_lnc  |
| 34611 hsa-mir-197 | LINC01143   | 0.321738935 mirna_lnc |
| 34612 hsa-mir-197 | AL445228.2  | 0.325582448 mirna_lnc |
| 34613 hsa-mir-197 | AC010271.2  | 0.307670497 mirna_lnc |

|                     |            |                       |
|---------------------|------------|-----------------------|
| 34614 hsa-mir-197   | AC073592.8 | 0.344627788 mirna_lnc |
| 34615 hsa-mir-197   | AP001025.1 | 0.326884582 mirna_lnc |
| 34616 hsa-mir-197   | SREBF2-AS1 | 0.308622444 mirna_lnc |
| 34617 hsa-mir-197   | AL354892.2 | 0.408691429 mirna_lnc |
| 34618 hsa-mir-197   | AC016205.1 | 0.337897637 mirna_lnc |
| 34619 hsa-mir-197   | AC090527.3 | 0.323742745 mirna_lnc |
| 34620 hsa-mir-197   | AP002387.2 | 0.334300403 mirna_lnc |
| 34621 hsa-mir-197   | AC131212.4 | 0.412069639 mirna_lnc |
| 34622 hsa-mir-197   | AC007099.1 | 0.300800767 mirna_lnc |
| 34623 hsa-mir-197   | STK4-AS1   | 0.343821803 mirna_lnc |
| 34624 hsa-mir-197   | LINC01101  | 0.4440314 mirna_lnc   |
| 34625 hsa-mir-197   | AF196972.1 | 0.314685083 mirna_lnc |
| 34626 hsa-mir-197   | AC145207.5 | 0.326468188 mirna_lnc |
| 34627 hsa-mir-197   | AC008115.1 | 0.319168039 mirna_lnc |
| 34628 hsa-mir-197   | AC126407.1 | 0.307702169 mirna_lnc |
| 34629 hsa-mir-197   | AC098818.2 | 0.302281464 mirna_lnc |
| 34630 hsa-mir-197   | AL031665.1 | 0.323592082 mirna_lnc |
| 34631 hsa-mir-197   | AC012360.1 | 0.460268301 mirna_lnc |
| 34632 hsa-mir-197   | AP006621.5 | 0.329809423 mirna_lnc |
| 34633 hsa-mir-197   | AC011700.1 | 0.316109006 mirna_lnc |
| 34634 hsa-mir-197   | AC012645.1 | 0.323611356 mirna_lnc |
| 34635 hsa-mir-197   | AL606537.1 | 0.300532386 mirna_lnc |
| 34636 hsa-mir-197   | AC010328.1 | 0.466766863 mirna_lnc |
| 34637 hsa-mir-197   | LINC01901  | 0.326645453 mirna_lnc |
| 34638 hsa-mir-197   | AL138767.3 | 0.377312262 mirna_lnc |
| 34639 hsa-mir-197   | Z98885.2   | 0.391442063 mirna_lnc |
| 34640 hsa-mir-197   | AC004925.1 | 0.30889222 mirna_lnc  |
| 34641 hsa-mir-197   | AL583808.1 | 0.302885527 mirna_lnc |
| 34642 hsa-mir-197   | DLGAP1-AS3 | 0.374784114 mirna_lnc |
| 34643 hsa-mir-197   | LINC00622  | 0.319528943 mirna_lnc |
| 34644 hsa-mir-197   | LINC02470  | 0.41355882 mirna_lnc  |
| 34645 hsa-mir-197   | AC005586.1 | 0.353446714 mirna_lnc |
| 34646 hsa-mir-197   | AC008443.3 | 0.319896688 mirna_lnc |
| 34647 hsa-mir-197   | AL160006.1 | 0.306459953 mirna_lnc |
| 34648 hsa-mir-197   | LINC02575  | 0.326141352 mirna_lnc |
| 34649 hsa-mir-197   | AC145423.2 | 0.338836486 mirna_lnc |
| 34650 hsa-mir-197   | AL163953.1 | 0.390079564 mirna_lnc |
| 34651 hsa-mir-197   | AL121832.1 | 0.340710301 mirna_lnc |
| 34652 hsa-mir-197   | AC007608.4 | 0.369894437 mirna_lnc |
| 34653 hsa-mir-197   | AC011447.7 | 0.357927588 mirna_lnc |
| 34654 hsa-mir-197   | CAMTA1-IT1 | 0.610089579 mirna_lnc |
| 34655 hsa-mir-197   | AC109309.1 | 0.470684775 mirna_lnc |
| 34656 hsa-mir-103-1 | AL137060.1 | 0.334330826 mirna_lnc |
| 34657 hsa-mir-103-1 | LINC01623  | 0.369451583 mirna_lnc |
| 34658 hsa-mir-103-1 | TMPO-AS1   | 0.388501896 mirna_lnc |
| 34659 hsa-mir-103-1 | AL035461.2 | 0.437703449 mirna_lnc |
| 34660 hsa-mir-103-1 | AL391244.2 | 0.333514922 mirna_lnc |
| 34661 hsa-mir-103-1 | DDX11-AS1  | 0.467982533 mirna_lnc |
| 34662 hsa-mir-103-1 | AL117332.1 | 0.394925177 mirna_lnc |
| 34663 hsa-mir-103-1 | AL353194.1 | 0.389076526 mirna_lnc |
| 34664 hsa-mir-103-1 | SCAT2      | 0.330999683 mirna_lnc |
| 34665 hsa-mir-103-1 | CEP83-DT   | 0.325631468 mirna_lnc |
| 34666 hsa-mir-103-1 | AC002401.2 | 0.368078164 mirna_lnc |
| 34667 hsa-mir-103-1 | AL354977.2 | 0.338310784 mirna_lnc |

|                     |            |                       |
|---------------------|------------|-----------------------|
| 34668 hsa-mir-103-1 | AC017083.1 | 0.322147039 mirna_lnc |
| 34669 hsa-mir-103-1 | AL451050.2 | 0.331627694 mirna_lnc |
| 34670 hsa-mir-103-1 | AL137802.2 | 0.331604704 mirna_lnc |
| 34671 hsa-mir-103-1 | AC084125.4 | 0.338821596 mirna_lnc |
| 34672 hsa-mir-103-1 | AC012360.3 | 0.322610883 mirna_lnc |
| 34673 hsa-mir-103-1 | AC008543.1 | 0.303638019 mirna_lnc |
| 34674 hsa-mir-103-1 | HOXA10-AS  | 0.353363466 mirna_lnc |
| 34675 hsa-mir-103-1 | AL513497.1 | 0.337886706 mirna_lnc |
| 34676 hsa-mir-103-1 | AC022413.1 | 0.319668705 mirna_lnc |
| 34677 hsa-mir-103-1 | AC024230.1 | 0.315433024 mirna_lnc |
| 34678 hsa-mir-103-1 | LINC01397  | 0.300413751 mirna_lnc |
| 34679 hsa-mir-103-1 | AC233992.3 | 0.30251829 mirna_lnc  |
| 34680 hsa-mir-103-1 | AC138904.1 | 0.332996546 mirna_lnc |
| 34681 hsa-mir-103-1 | AL391152.1 | 0.367352957 mirna_lnc |
| 34682 hsa-mir-103-1 | AC007128.2 | 0.307240957 mirna_lnc |
| 34683 hsa-mir-103-1 | AC006486.2 | 0.329355605 mirna_lnc |
| 34684 hsa-mir-103-1 | LINC02334  | 0.384801877 mirna_lnc |
| 34685 hsa-mir-103-1 | AC002076.1 | 0.339896454 mirna_lnc |
| 34686 hsa-mir-103-1 | AC007952.4 | 0.336425441 mirna_lnc |
| 34687 hsa-mir-103-1 | AC034102.6 | 0.356721225 mirna_lnc |
| 34688 hsa-mir-103-1 | POLH-AS1   | 0.319254958 mirna_lnc |
| 34689 hsa-mir-103-1 | AC100782.1 | 0.360642282 mirna_lnc |
| 34690 hsa-mir-103-1 | AL391069.3 | 0.304260437 mirna_lnc |
| 34691 hsa-mir-103-1 | LINC01977  | 0.396159323 mirna_lnc |
| 34692 hsa-mir-103-1 | SATB2-AS1  | 0.387687104 mirna_lnc |
| 34693 hsa-mir-103-1 | AL354892.2 | 0.397366825 mirna_lnc |
| 34694 hsa-mir-103-1 | AC016205.1 | 0.346548065 mirna_lnc |
| 34695 hsa-mir-103-1 | AC090527.3 | 0.327474674 mirna_lnc |
| 34696 hsa-mir-103-1 | ISM1-AS1   | 0.303518733 mirna_lnc |
| 34697 hsa-mir-103-1 | AC100803.1 | 0.317335512 mirna_lnc |
| 34698 hsa-mir-103-1 | AC007128.1 | 0.396886567 mirna_lnc |
| 34699 hsa-mir-103-1 | AC005379.1 | 0.300041817 mirna_lnc |
| 34700 hsa-mir-103-1 | HGC6.3     | 0.312761551 mirna_lnc |
| 34701 hsa-mir-103-1 | AC092171.3 | 0.335743168 mirna_lnc |
| 34702 hsa-mir-103-1 | AC005224.1 | 0.302292879 mirna_lnc |
| 34703 hsa-mir-103-1 | AC011773.1 | 0.436956959 mirna_lnc |
| 34704 hsa-mir-103-1 | AP000355.1 | 0.377806794 mirna_lnc |
| 34705 hsa-mir-103-1 | CNNM3-DT   | 0.314661475 mirna_lnc |
| 34706 hsa-mir-103-1 | AL136528.1 | 0.400462384 mirna_lnc |
| 34707 hsa-mir-103-1 | AGAP1-IT1  | 0.340900254 mirna_lnc |
| 34708 hsa-mir-103-1 | LINC02204  | 0.3171706 mirna_lnc   |
| 34709 hsa-mir-103-1 | AL512652.2 | 0.336202661 mirna_lnc |
| 34710 hsa-mir-103-1 | AL121782.1 | 0.338644831 mirna_lnc |
| 34711 hsa-mir-103-1 | AC117395.1 | 0.401236478 mirna_lnc |
| 34712 hsa-mir-103-1 | AL031186.1 | 0.33126048 mirna_lnc  |
| 34713 hsa-mir-103-1 | TERC       | 0.306470195 mirna_lnc |
| 34714 hsa-mir-103-1 | PSG8-AS1   | 0.34695409 mirna_lnc  |
| 34715 hsa-mir-103-1 | BX248123.1 | 0.358544075 mirna_lnc |
| 34716 hsa-mir-103-1 | AC025219.1 | 0.318152976 mirna_lnc |
| 34717 hsa-mir-103-1 | FAM230I    | 0.348652655 mirna_lnc |
| 34718 hsa-mir-103-1 | AC116025.2 | 0.303784917 mirna_lnc |
| 34719 hsa-mir-103-1 | AC244517.1 | 0.387048048 mirna_lnc |
| 34720 hsa-mir-103-1 | ZNF649-AS1 | 0.404897306 mirna_lnc |
| 34721 hsa-mir-103-1 | AL355810.1 | 0.369966293 mirna_lnc |

|       |               |            |             |           |
|-------|---------------|------------|-------------|-----------|
| 34722 | hsa-mir-103-1 | AL136531.1 | 0.303606161 | mirna_lnc |
| 34723 | hsa-mir-103-1 | SEMA6A-AS2 | 0.345752429 | mirna_lnc |
| 34724 | hsa-mir-103-1 | AC083843.1 | 0.328365113 | mirna_lnc |
| 34725 | hsa-mir-103-1 | AOAH-IT1   | 0.420954643 | mirna_lnc |
| 34726 | hsa-mir-103-1 | AC015853.2 | 0.310186281 | mirna_lnc |
| 34727 | hsa-mir-103-1 | GAU1       | 0.332724142 | mirna_lnc |
| 34728 | hsa-mir-103-1 | Z93241.1   | 0.308530554 | mirna_lnc |
| 34729 | hsa-mir-103-1 | GPC6-AS1   | 0.308973101 | mirna_lnc |
| 34730 | hsa-mir-103-1 | AC007370.2 | 0.300490596 | mirna_lnc |
| 34731 | hsa-mir-103-1 | LINC00471  | 0.352379256 | mirna_lnc |
| 34732 | hsa-mir-103-1 | AC110760.2 | 0.335328407 | mirna_lnc |
| 34733 | hsa-mir-103-1 | AC017104.3 | 0.322982968 | mirna_lnc |
| 34734 | hsa-mir-103-1 | AL109910.2 | 0.400064591 | mirna_lnc |
| 34735 | hsa-mir-103-1 | AC002401.3 | 0.332784218 | mirna_lnc |
| 34736 | hsa-mir-103-1 | BRWD1-AS1  | 0.354139463 | mirna_lnc |
| 34737 | hsa-mir-103-1 | AL161729.4 | 0.352029322 | mirna_lnc |
| 34738 | hsa-mir-103-1 | AC021092.1 | 0.317325452 | mirna_lnc |
| 34739 | hsa-mir-106a  | LINC01783  | 0.451056672 | mirna_lnc |
| 34740 | hsa-mir-106a  | AL160286.2 | 0.434250635 | mirna_lnc |
| 34741 | hsa-mir-106a  | TMPO-AS1   | 0.464392004 | mirna_lnc |
| 34742 | hsa-mir-106a  | AL035461.2 | 0.347407391 | mirna_lnc |
| 34743 | hsa-mir-106a  | AL117332.1 | 0.314266951 | mirna_lnc |
| 34744 | hsa-mir-106a  | AC002401.2 | 0.315893687 | mirna_lnc |
| 34745 | hsa-mir-106a  | HOXC-AS2   | 0.324722268 | mirna_lnc |
| 34746 | hsa-mir-106a  | AC027117.2 | 0.477790402 | mirna_lnc |
| 34747 | hsa-mir-106a  | LINC01419  | 0.563838429 | mirna_lnc |
| 34748 | hsa-mir-106a  | AC063977.6 | 0.431985087 | mirna_lnc |
| 34749 | hsa-mir-106a  | LINC00567  | 0.443005493 | mirna_lnc |
| 34750 | hsa-mir-106a  | AF233439.1 | 0.37289688  | mirna_lnc |
| 34751 | hsa-mir-106a  | AC008738.2 | 0.338776879 | mirna_lnc |
| 34752 | hsa-mir-106a  | LINC02302  | 0.486709073 | mirna_lnc |
| 34753 | hsa-mir-106a  | AC016723.1 | 0.49739687  | mirna_lnc |
| 34754 | hsa-mir-106a  | AC073857.1 | 0.325542325 | mirna_lnc |
| 34755 | hsa-mir-106a  | AC011481.4 | 0.36619596  | mirna_lnc |
| 34756 | hsa-mir-106a  | AC008543.1 | 0.377882872 | mirna_lnc |
| 34757 | hsa-mir-106a  | AJ239322.1 | 0.519093715 | mirna_lnc |
| 34758 | hsa-mir-106a  | AL391152.1 | 0.31159301  | mirna_lnc |
| 34759 | hsa-mir-106a  | AC026992.2 | 0.439275133 | mirna_lnc |
| 34760 | hsa-mir-106a  | AL358473.1 | 0.402233306 | mirna_lnc |
| 34761 | hsa-mir-106a  | ABALON     | 0.300961669 | mirna_lnc |
| 34762 | hsa-mir-106a  | AC015689.1 | 0.330296039 | mirna_lnc |
| 34763 | hsa-mir-106a  | LINC01671  | 0.488883809 | mirna_lnc |
| 34764 | hsa-mir-106a  | AC087273.2 | 0.506050547 | mirna_lnc |
| 34765 | hsa-mir-106a  | POLH-AS1   | 0.309755552 | mirna_lnc |
| 34766 | hsa-mir-106a  | TMC01-AS1  | 0.307082836 | mirna_lnc |
| 34767 | hsa-mir-106a  | AC126614.1 | 0.300896066 | mirna_lnc |
| 34768 | hsa-mir-106a  | AL121721.1 | 0.563689923 | mirna_lnc |
| 34769 | hsa-mir-106a  | AC026271.3 | 0.303181347 | mirna_lnc |
| 34770 | hsa-mir-106a  | AC012531.2 | 0.301488359 | mirna_lnc |
| 34771 | hsa-mir-106a  | ISM1-AS1   | 0.344971992 | mirna_lnc |
| 34772 | hsa-mir-106a  | AC005379.1 | 0.344613892 | mirna_lnc |
| 34773 | hsa-mir-106a  | AP000525.1 | 0.345616921 | mirna_lnc |
| 34774 | hsa-mir-106a  | AP001065.2 | 0.367252069 | mirna_lnc |
| 34775 | hsa-mir-106a  | AC092171.3 | 0.348334869 | mirna_lnc |



|                    |             |                       |
|--------------------|-------------|-----------------------|
| 34776 hsa-mir-106a | AC083900.1  | 0.501031288 mirna_lnc |
| 34777 hsa-mir-106a | LINC02177   | 0.472937792 mirna_lnc |
| 34778 hsa-mir-106a | AL445673.1  | 0.458927106 mirna_lnc |
| 34779 hsa-mir-106a | AL137058.3  | 0.628898331 mirna_lnc |
| 34780 hsa-mir-106a | LINC02204   | 0.334191206 mirna_lnc |
| 34781 hsa-mir-106a | AP005328.2  | 0.313694274 mirna_lnc |
| 34782 hsa-mir-106a | AC005332.3  | 0.326417524 mirna_lnc |
| 34783 hsa-mir-106a | ZNF385D-AS1 | 0.501716451 mirna_lnc |
| 34784 hsa-mir-106a | AP003064.2  | 0.450775639 mirna_lnc |
| 34785 hsa-mir-106a | AL603832.1  | 0.322346792 mirna_lnc |
| 34786 hsa-mir-106a | AC007638.2  | 0.513201085 mirna_lnc |
| 34787 hsa-mir-106a | AL135905.1  | 0.318926182 mirna_lnc |
| 34788 hsa-mir-106a | AC011700.1  | 0.385044411 mirna_lnc |
| 34789 hsa-mir-106a | AC011450.1  | 0.309310801 mirna_lnc |
| 34790 hsa-mir-106a | AC012645.1  | 0.555661011 mirna_lnc |
| 34791 hsa-mir-106a | AC007541.1  | 0.362960842 mirna_lnc |
| 34792 hsa-mir-106a | CATIP-AS2   | 0.340491204 mirna_lnc |
| 34793 hsa-mir-106a | AC126178.1  | 0.365608587 mirna_lnc |
| 34794 hsa-mir-106a | AC116025.2  | 0.51393775 mirna_lnc  |
| 34795 hsa-mir-106a | AL355102.4  | 0.421970145 mirna_lnc |
| 34796 hsa-mir-106a | AC243960.3  | 0.441614866 mirna_lnc |
| 34797 hsa-mir-106a | AC024361.1  | 0.34751903 mirna_lnc  |
| 34798 hsa-mir-106a | AC000036.1  | 0.51779316 mirna_lnc  |
| 34799 hsa-mir-106a | AC011815.1  | 0.303415908 mirna_lnc |
| 34800 hsa-mir-106a | HCG15       | 0.447402494 mirna_lnc |
| 34801 hsa-mir-106a | AC147651.2  | 0.358107856 mirna_lnc |
| 34802 hsa-mir-106a | AC091806.1  | 0.371314337 mirna_lnc |
| 34803 hsa-mir-106a | SEMA6A-AS2  | 0.518225241 mirna_lnc |
| 34804 hsa-mir-106a | LINC02365   | 0.570948182 mirna_lnc |
| 34805 hsa-mir-106a | LINC01979   | 0.33335237 mirna_lnc  |
| 34806 hsa-mir-106a | AC125616.1  | 0.339640342 mirna_lnc |
| 34807 hsa-mir-106a | AC010501.1  | 0.363377449 mirna_lnc |
| 34808 hsa-mir-106a | AC117402.1  | 0.617008567 mirna_lnc |
| 34809 hsa-mir-106a | LINC01291   | 0.306293669 mirna_lnc |
| 34810 hsa-mir-106a | ZFHX4-AS1   | 0.362273078 mirna_lnc |
| 34811 hsa-mir-106a | AC003070.2  | 0.447087958 mirna_lnc |
| 34812 hsa-mir-106a | AC005336.3  | 0.581593074 mirna_lnc |
| 34813 hsa-mir-106a | CEBPA-DT    | 0.452365004 mirna_lnc |
| 34814 hsa-mir-106a | GPC6-AS1    | 0.349837667 mirna_lnc |
| 34815 hsa-mir-106a | AC074135.1  | 0.449615847 mirna_lnc |
| 34816 hsa-mir-106a | SPANXA2-OT1 | 0.470606784 mirna_lnc |
| 34817 hsa-mir-106a | AC004076.2  | 0.31464334 mirna_lnc  |
| 34818 hsa-mir-106a | AC017104.3  | 0.306050206 mirna_lnc |
| 34819 hsa-mir-106a | LINC00909   | 0.302229892 mirna_lnc |
| 34820 hsa-mir-106a | AL161725.2  | 0.30432398 mirna_lnc  |
| 34821 hsa-mir-106a | LINC02575   | 0.385401285 mirna_lnc |
| 34822 hsa-mir-106a | AC005391.1  | 0.303772295 mirna_lnc |
| 34823 hsa-mir-106a | AC012313.9  | 0.321659708 mirna_lnc |
| 34824 hsa-mir-106a | AC002401.3  | 0.330220488 mirna_lnc |
| 34825 hsa-mir-106a | AC061975.6  | 0.57452798 mirna_lnc  |
| 34826 hsa-mir-106a | AL662791.1  | 0.367590999 mirna_lnc |
| 34827 hsa-mir-106a | LINC00605   | 0.358237278 mirna_lnc |
| 34828 hsa-mir-106a | AL050320.1  | 0.423489921 mirna_lnc |
| 34829 hsa-mir-106a | AL132655.1  | 0.378456577 mirna_lnc |

|                    |            |                       |
|--------------------|------------|-----------------------|
| 34830 hsa-mir-106a | AP001476.1 | 0.319929714 mirna_lnc |
| 34831 hsa-mir-106a | AC021092.1 | 0.300138061 mirna_lnc |
| 34832 hsa-mir-106a | AC243836.1 | 0.407423881 mirna_lnc |
| 34833 hsa-mir-106a | AC099684.2 | 0.430171185 mirna_lnc |
| 34834 hsa-mir-409  | AC245100.6 | 0.399471795 mirna_lnc |
| 34835 hsa-mir-409  | AC124303.1 | 0.578924582 mirna_lnc |
| 34836 hsa-mir-409  | LINC02261  | 0.301801332 mirna_lnc |
| 34837 hsa-mir-409  | AL133467.2 | 0.471128954 mirna_lnc |
| 34838 hsa-mir-409  | AC090192.2 | 0.304649576 mirna_lnc |
| 34839 hsa-mir-409  | LINC02003  | 0.37617719 mirna_lnc  |
| 34840 hsa-mir-409  | AC004835.1 | 0.605742797 mirna_lnc |
| 34841 hsa-mir-409  | LINC02321  | 0.314378813 mirna_lnc |
| 34842 hsa-mir-409  | AL139023.1 | 0.306479431 mirna_lnc |
| 34843 hsa-mir-409  | GK-IT1     | 0.332459365 mirna_lnc |
| 34844 hsa-mir-409  | MAGEA4-AS1 | 0.344574524 mirna_lnc |
| 34845 hsa-mir-409  | AC092535.4 | 0.403733469 mirna_lnc |
| 34846 hsa-mir-409  | AL358473.1 | 0.385056818 mirna_lnc |
| 34847 hsa-mir-409  | AC096887.2 | 0.375363188 mirna_lnc |
| 34848 hsa-mir-409  | AC034102.6 | 0.380638438 mirna_lnc |
| 34849 hsa-mir-409  | AF186192.3 | 0.315045944 mirna_lnc |
| 34850 hsa-mir-409  | AF186192.1 | 0.454670481 mirna_lnc |
| 34851 hsa-mir-409  | AC026495.1 | 0.40114101 mirna_lnc  |
| 34852 hsa-mir-409  | AC008063.1 | 0.301363422 mirna_lnc |
| 34853 hsa-mir-409  | LINC01101  | 0.494683519 mirna_lnc |
| 34854 hsa-mir-409  | AC002091.1 | 0.452960986 mirna_lnc |
| 34855 hsa-mir-409  | AC090774.2 | 0.448193971 mirna_lnc |
| 34856 hsa-mir-409  | LINC02204  | 0.338225282 mirna_lnc |
| 34857 hsa-mir-409  | AC108865.1 | 0.30886267 mirna_lnc  |
| 34858 hsa-mir-409  | AC084871.2 | 0.309175734 mirna_lnc |
| 34859 hsa-mir-409  | AL132712.2 | 0.321389964 mirna_lnc |
| 34860 hsa-mir-409  | AL132712.1 | 0.323748736 mirna_lnc |
| 34861 hsa-mir-409  | AC090907.2 | 0.316410783 mirna_lnc |
| 34862 hsa-mir-409  | AC007384.1 | 0.307461638 mirna_lnc |
| 34863 hsa-mir-409  | AC023824.6 | 0.453190452 mirna_lnc |
| 34864 hsa-mir-409  | AC068448.1 | 0.326925647 mirna_lnc |
| 34865 hsa-mir-409  | AL109917.1 | 0.318254816 mirna_lnc |
| 34866 hsa-mir-409  | INKA2-AS1  | 0.43810363 mirna_lnc  |
| 34867 hsa-mir-409  | AC023796.2 | 0.368298026 mirna_lnc |
| 34868 hsa-mir-409  | PICSAR     | 0.408105866 mirna_lnc |
| 34869 hsa-mir-409  | AC099667.1 | 0.376342628 mirna_lnc |
| 34870 hsa-mir-409  | AC002091.2 | 0.397802751 mirna_lnc |
| 34871 hsa-mir-409  | AC078852.2 | 0.358125024 mirna_lnc |
| 34872 hsa-mir-409  | LINC02365  | 0.381963378 mirna_lnc |
| 34873 hsa-mir-409  | AC097652.1 | 0.307048321 mirna_lnc |
| 34874 hsa-mir-409  | LINC00165  | 0.408522026 mirna_lnc |
| 34875 hsa-mir-409  | AL596442.2 | 0.427523082 mirna_lnc |
| 34876 hsa-mir-409  | AC008507.2 | 0.454924226 mirna_lnc |
| 34877 hsa-mir-409  | AL118511.1 | 0.37988927 mirna_lnc  |
| 34878 hsa-mir-409  | AP003392.3 | 0.4007539 mirna_lnc   |
| 34879 hsa-mir-409  | AC010894.5 | 0.385462408 mirna_lnc |
| 34880 hsa-mir-409  | AC005006.1 | 0.554600478 mirna_lnc |
| 34881 hsa-mir-409  | AC133961.1 | 0.641523033 mirna_lnc |
| 34882 hsa-mir-409  | CD81-AS1   | 0.381748966 mirna_lnc |
| 34883 hsa-mir-409  | AC023310.4 | 0.359474903 mirna_lnc |

|                      |            |                       |
|----------------------|------------|-----------------------|
| 34884 hsa-mir-409    | AC118758.3 | 0.461608774 mirna_lnc |
| 34885 hsa-mir-409    | AC079921.2 | 0.311344967 mirna_lnc |
| 34886 hsa-mir-409    | AP001972.4 | 0.507030643 mirna_lnc |
| 34887 hsa-mir-409    | AP001476.1 | 0.407927061 mirna_lnc |
| 34888 hsa-mir-409    | AP001626.1 | 0.35246398 mirna_lnc  |
| 34889 hsa-mir-32     | AL035701.1 | 0.307839599 mirna_lnc |
| 34890 hsa-mir-32     | AC106876.1 | 0.328995031 mirna_lnc |
| 34891 hsa-mir-32     | AL354920.1 | 0.306234538 mirna_lnc |
| 34892 hsa-mir-32     | AL158825.2 | 0.353418879 mirna_lnc |
| 34893 hsa-mir-32     | AP003733.4 | 0.309232932 mirna_lnc |
| 34894 hsa-mir-32     | AC103691.1 | 0.3806565 mirna_lnc   |
| 34895 hsa-mir-32     | AC079915.1 | 0.330378653 mirna_lnc |
| 34896 hsa-mir-32     | AC115102.1 | 0.363790326 mirna_lnc |
| 34897 hsa-mir-32     | AL121989.1 | 0.318370877 mirna_lnc |
| 34898 hsa-mir-32     | AC015967.2 | 0.300079513 mirna_lnc |
| 34899 hsa-mir-32     | AL353608.4 | 0.315931702 mirna_lnc |
| 34900 hsa-mir-32     | AC092067.1 | 0.356342378 mirna_lnc |
| 34901 hsa-mir-125b-2 | AC103746.1 | 0.740535434 mirna_lnc |
| 34902 hsa-mir-125b-2 | AC019294.2 | 0.331488225 mirna_lnc |
| 34903 hsa-mir-125b-2 | AC129492.5 | 0.447131344 mirna_lnc |
| 34904 hsa-mir-125b-2 | LINC02593  | 0.671046029 mirna_lnc |
| 34905 hsa-mir-125b-2 | AJ006995.1 | 0.382407605 mirna_lnc |
| 34906 hsa-mir-125b-2 | LINC01560  | 0.354070262 mirna_lnc |
| 34907 hsa-mir-125b-2 | PACRG-AS1  | 0.462872579 mirna_lnc |
| 34908 hsa-mir-125b-2 | LINC01625  | 0.757809078 mirna_lnc |
| 34909 hsa-mir-125b-2 | AC099850.1 | 0.324598866 mirna_lnc |
| 34910 hsa-mir-125b-2 | AC012409.2 | 0.499772886 mirna_lnc |
| 34911 hsa-mir-125b-2 | AC093520.1 | 0.318348104 mirna_lnc |
| 34912 hsa-mir-125b-2 | TNRC6C-AS1 | 0.389977014 mirna_lnc |
| 34913 hsa-mir-125b-2 | LOH12CR2   | 0.419338675 mirna_lnc |
| 34914 hsa-mir-125b-2 | AL670729.1 | 0.300799613 mirna_lnc |
| 34915 hsa-mir-125b-2 | AC016251.2 | 0.35021521 mirna_lnc  |
| 34916 hsa-mir-125b-2 | AC008105.1 | 0.397488622 mirna_lnc |
| 34917 hsa-mir-125b-2 | LINC01311  | 0.368404008 mirna_lnc |
| 34918 hsa-mir-125b-2 | AC074117.1 | 0.341806386 mirna_lnc |
| 34919 hsa-mir-125b-2 | TFAP2A-AS1 | 0.435339698 mirna_lnc |
| 34920 hsa-mir-125b-2 | AC022387.1 | 0.548396014 mirna_lnc |
| 34921 hsa-mir-125b-2 | AC063977.6 | 0.318462034 mirna_lnc |
| 34922 hsa-mir-125b-2 | AC016737.1 | 0.304618709 mirna_lnc |
| 34923 hsa-mir-125b-2 | AC002066.1 | 0.484229371 mirna_lnc |
| 34924 hsa-mir-125b-2 | FAM66D     | 0.318476973 mirna_lnc |
| 34925 hsa-mir-125b-2 | AL139288.1 | 0.528609562 mirna_lnc |
| 34926 hsa-mir-125b-2 | MAFA-AS1   | 0.429193861 mirna_lnc |
| 34927 hsa-mir-125b-2 | AC104667.1 | 0.525067787 mirna_lnc |
| 34928 hsa-mir-125b-2 | AC017083.1 | 0.303705591 mirna_lnc |
| 34929 hsa-mir-125b-2 | AC098828.2 | 0.386643806 mirna_lnc |
| 34930 hsa-mir-125b-2 | AC012377.1 | 0.303422381 mirna_lnc |
| 34931 hsa-mir-125b-2 | AP002852.1 | 0.326282701 mirna_lnc |
| 34932 hsa-mir-125b-2 | AL137802.2 | 0.51419043 mirna_lnc  |
| 34933 hsa-mir-125b-2 | AC020763.4 | 0.313549268 mirna_lnc |
| 34934 hsa-mir-125b-2 | AC004069.1 | 0.325144 mirna_lnc    |
| 34935 hsa-mir-125b-2 | AC093642.2 | 0.633833605 mirna_lnc |
| 34936 hsa-mir-125b-2 | AL157823.2 | 0.478399889 mirna_lnc |
| 34937 hsa-mir-125b-2 | AP000553.2 | 0.68255183 mirna_lnc  |

|       |                |             |             |           |
|-------|----------------|-------------|-------------|-----------|
| 34938 | hsa-mir-125b-2 | RHPN1-AS1   | 0.326279691 | mirna_lnc |
| 34939 | hsa-mir-125b-2 | LINC02175   | 0.496958681 | mirna_lnc |
| 34940 | hsa-mir-125b-2 | SIX3-AS1    | 0.31254147  | mirna_lnc |
| 34941 | hsa-mir-125b-2 | AC110813.1  | 0.668891905 | mirna_lnc |
| 34942 | hsa-mir-125b-2 | LINC01126   | 0.396956098 | mirna_lnc |
| 34943 | hsa-mir-125b-2 | LINC01087   | 0.57215537  | mirna_lnc |
| 34944 | hsa-mir-125b-2 | AC135803.1  | 0.736692212 | mirna_lnc |
| 34945 | hsa-mir-125b-2 | SYNGAP1-AS1 | 0.329059867 | mirna_lnc |
| 34946 | hsa-mir-125b-2 | AL391152.1  | 0.359925222 | mirna_lnc |
| 34947 | hsa-mir-125b-2 | MAGEA4-AS1  | 0.468252532 | mirna_lnc |
| 34948 | hsa-mir-125b-2 | AC105339.5  | 0.483290987 | mirna_lnc |
| 34949 | hsa-mir-125b-2 | AC011287.2  | 0.395960559 | mirna_lnc |
| 34950 | hsa-mir-125b-2 | AL359643.3  | 0.334250574 | mirna_lnc |
| 34951 | hsa-mir-125b-2 | AC092167.1  | 0.334536483 | mirna_lnc |
| 34952 | hsa-mir-125b-2 | AC090578.2  | 0.699501128 | mirna_lnc |
| 34953 | hsa-mir-125b-2 | C7orf65     | 0.303609153 | mirna_lnc |
| 34954 | hsa-mir-125b-2 | EIPR1-IT1   | 0.320453478 | mirna_lnc |
| 34955 | hsa-mir-125b-2 | AL078605.1  | 0.568004464 | mirna_lnc |
| 34956 | hsa-mir-125b-2 | AC008280.3  | 0.33264227  | mirna_lnc |
| 34957 | hsa-mir-125b-2 | AC026254.2  | 0.320585372 | mirna_lnc |
| 34958 | hsa-mir-125b-2 | AL138760.1  | 0.397942916 | mirna_lnc |
| 34959 | hsa-mir-125b-2 | LINC01686   | 0.34080132  | mirna_lnc |
| 34960 | hsa-mir-125b-2 | Z95115.1    | 0.535560577 | mirna_lnc |
| 34961 | hsa-mir-125b-2 | LINC01143   | 0.525056666 | mirna_lnc |
| 34962 | hsa-mir-125b-2 | AC022031.2  | 0.320989456 | mirna_lnc |
| 34963 | hsa-mir-125b-2 | AC004884.2  | 0.351250246 | mirna_lnc |
| 34964 | hsa-mir-125b-2 | AC010271.2  | 0.314469097 | mirna_lnc |
| 34965 | hsa-mir-125b-2 | AC079145.1  | 0.366431846 | mirna_lnc |
| 34966 | hsa-mir-125b-2 | AC005695.1  | 0.335597011 | mirna_lnc |
| 34967 | hsa-mir-125b-2 | AC020907.5  | 0.522136462 | mirna_lnc |
| 34968 | hsa-mir-125b-2 | UBR5-AS1    | 0.359748844 | mirna_lnc |
| 34969 | hsa-mir-125b-2 | AC130650.2  | 0.476045984 | mirna_lnc |
| 34970 | hsa-mir-125b-2 | AC129926.1  | 0.3021416   | mirna_lnc |
| 34971 | hsa-mir-125b-2 | AL157400.4  | 0.315740683 | mirna_lnc |
| 34972 | hsa-mir-125b-2 | AF129075.2  | 0.313892014 | mirna_lnc |
| 34973 | hsa-mir-125b-2 | AL008721.2  | 0.350200753 | mirna_lnc |
| 34974 | hsa-mir-125b-2 | AC110769.2  | 0.463523907 | mirna_lnc |
| 34975 | hsa-mir-125b-2 | AL138762.1  | 0.374457347 | mirna_lnc |
| 34976 | hsa-mir-125b-2 | AC007996.1  | 0.532871717 | mirna_lnc |
| 34977 | hsa-mir-125b-2 | AC005786.4  | 0.305679793 | mirna_lnc |
| 34978 | hsa-mir-125b-2 | AC096642.1  | 0.3712488   | mirna_lnc |
| 34979 | hsa-mir-125b-2 | LINC01521   | 0.3379764   | mirna_lnc |
| 34980 | hsa-mir-125b-2 | AC016708.1  | 0.805902653 | mirna_lnc |
| 34981 | hsa-mir-125b-2 | AC091057.2  | 0.333561859 | mirna_lnc |
| 34982 | hsa-mir-125b-2 | AC009506.1  | 0.520581571 | mirna_lnc |
| 34983 | hsa-mir-125b-2 | AC004053.1  | 0.301456814 | mirna_lnc |
| 34984 | hsa-mir-125b-2 | AC007848.1  | 0.427239763 | mirna_lnc |
| 34985 | hsa-mir-125b-2 | AC099786.1  | 0.772077268 | mirna_lnc |
| 34986 | hsa-mir-125b-2 | AC063948.1  | 0.375466604 | mirna_lnc |
| 34987 | hsa-mir-125b-2 | AC087742.1  | 0.334437324 | mirna_lnc |
| 34988 | hsa-mir-125b-2 | AL354892.2  | 0.367862952 | mirna_lnc |
| 34989 | hsa-mir-125b-2 | AP001330.5  | 0.322142128 | mirna_lnc |
| 34990 | hsa-mir-125b-2 | AC011773.4  | 0.420238455 | mirna_lnc |
| 34991 | hsa-mir-125b-2 | AL513365.2  | 0.328891127 | mirna_lnc |

|       |                |            |             |           |
|-------|----------------|------------|-------------|-----------|
| 34992 | hsa-mir-125b-2 | AC016205.1 | 0.341772068 | mirna_lnc |
| 34993 | hsa-mir-125b-2 | AC064836.3 | 0.32347799  | mirna_lnc |
| 34994 | hsa-mir-125b-2 | AL512408.1 | 0.328049062 | mirna_lnc |
| 34995 | hsa-mir-125b-2 | AC023034.2 | 0.514679472 | mirna_lnc |
| 34996 | hsa-mir-125b-2 | AC246793.1 | 0.426061525 | mirna_lnc |
| 34997 | hsa-mir-125b-2 | AC131532.1 | 0.473591778 | mirna_lnc |
| 34998 | hsa-mir-125b-2 | ERICD      | 0.527927655 | mirna_lnc |
| 34999 | hsa-mir-125b-2 | AL662795.2 | 0.382531287 | mirna_lnc |
| 35000 | hsa-mir-125b-2 | AC006262.1 | 0.359715857 | mirna_lnc |
| 35001 | hsa-mir-125b-2 | AC092608.1 | 0.357580922 | mirna_lnc |
| 35002 | hsa-mir-125b-2 | Z93930.3   | 0.409178624 | mirna_lnc |
| 35003 | hsa-mir-125b-2 | AL136040.1 | 0.415267312 | mirna_lnc |
| 35004 | hsa-mir-125b-2 | AC073389.1 | 0.457711998 | mirna_lnc |
| 35005 | hsa-mir-125b-2 | DNM3-IT1   | 0.714692839 | mirna_lnc |
| 35006 | hsa-mir-125b-2 | AC006206.1 | 0.429750673 | mirna_lnc |
| 35007 | hsa-mir-125b-2 | AC090772.4 | 0.456201778 | mirna_lnc |
| 35008 | hsa-mir-125b-2 | AC078802.1 | 0.309225013 | mirna_lnc |
| 35009 | hsa-mir-125b-2 | AL451064.1 | 0.737509025 | mirna_lnc |
| 35010 | hsa-mir-125b-2 | AC084876.2 | 0.393774307 | mirna_lnc |
| 35011 | hsa-mir-125b-2 | AL645608.4 | 0.656215272 | mirna_lnc |
| 35012 | hsa-mir-125b-2 | AC005730.2 | 0.316364979 | mirna_lnc |
| 35013 | hsa-mir-125b-2 | AC008115.1 | 0.345732143 | mirna_lnc |
| 35014 | hsa-mir-125b-2 | AC126407.1 | 0.332753974 | mirna_lnc |
| 35015 | hsa-mir-125b-2 | AP001029.1 | 0.477624753 | mirna_lnc |
| 35016 | hsa-mir-125b-2 | AC007663.3 | 0.610084462 | mirna_lnc |
| 35017 | hsa-mir-125b-2 | AL590787.1 | 0.353159728 | mirna_lnc |
| 35018 | hsa-mir-125b-2 | AC007773.1 | 0.321230175 | mirna_lnc |
| 35019 | hsa-mir-125b-2 | AC009120.5 | 0.311502582 | mirna_lnc |
| 35020 | hsa-mir-125b-2 | AC093821.1 | 0.363229258 | mirna_lnc |
| 35021 | hsa-mir-125b-2 | AP000253.1 | 0.466673891 | mirna_lnc |
| 35022 | hsa-mir-125b-2 | AC034102.5 | 0.310885215 | mirna_lnc |
| 35023 | hsa-mir-125b-2 | AL138831.1 | 0.501966536 | mirna_lnc |
| 35024 | hsa-mir-125b-2 | AC005225.3 | 0.309135391 | mirna_lnc |
| 35025 | hsa-mir-125b-2 | AP001178.3 | 0.342443397 | mirna_lnc |
| 35026 | hsa-mir-125b-2 | AC010735.1 | 0.611876363 | mirna_lnc |
| 35027 | hsa-mir-125b-2 | AC079600.3 | 0.586551442 | mirna_lnc |
| 35028 | hsa-mir-125b-2 | AL022324.3 | 0.492606684 | mirna_lnc |
| 35029 | hsa-mir-125b-2 | AC078881.1 | 0.340580961 | mirna_lnc |
| 35030 | hsa-mir-125b-2 | AP000320.1 | 0.314228421 | mirna_lnc |
| 35031 | hsa-mir-125b-2 | AC105118.1 | 0.491670456 | mirna_lnc |
| 35032 | hsa-mir-125b-2 | AC007391.1 | 0.384700234 | mirna_lnc |
| 35033 | hsa-mir-125b-2 | AC005005.3 | 0.354453442 | mirna_lnc |
| 35034 | hsa-mir-125b-2 | AC100814.1 | 0.360188878 | mirna_lnc |
| 35035 | hsa-mir-125b-2 | AP005328.2 | 0.315506927 | mirna_lnc |
| 35036 | hsa-mir-125b-2 | AP005060.1 | 0.335317549 | mirna_lnc |
| 35037 | hsa-mir-125b-2 | BX649601.1 | 0.304073362 | mirna_lnc |
| 35038 | hsa-mir-125b-2 | AC008736.2 | 0.333677822 | mirna_lnc |
| 35039 | hsa-mir-125b-2 | AC091271.1 | 0.318562243 | mirna_lnc |
| 35040 | hsa-mir-125b-2 | LINC01771  | 0.315386082 | mirna_lnc |
| 35041 | hsa-mir-125b-2 | LINC01238  | 0.509302138 | mirna_lnc |
| 35042 | hsa-mir-125b-2 | ATP2B1-AS1 | 0.479096901 | mirna_lnc |
| 35043 | hsa-mir-125b-2 | AL138902.1 | 0.314398261 | mirna_lnc |
| 35044 | hsa-mir-125b-2 | AP001029.2 | 0.440137028 | mirna_lnc |
| 35045 | hsa-mir-125b-2 | AC006206.2 | 0.343463949 | mirna_lnc |

|                      |             |                        |
|----------------------|-------------|------------------------|
| 35046 hsa-mir-125b-2 | AP000255. 1 | 0. 771055493 mirna_lnc |
| 35047 hsa-mir-125b-2 | AL132765. 2 | 0. 434058127 mirna_lnc |
| 35048 hsa-mir-125b-2 | AC127024. 2 | 0. 312715691 mirna_lnc |
| 35049 hsa-mir-125b-2 | AC104072. 1 | 0. 550195047 mirna_lnc |
| 35050 hsa-mir-125b-2 | CAHM        | 0. 38846238 mirna_lnc  |
| 35051 hsa-mir-125b-2 | AP005329. 2 | 0. 435307133 mirna_lnc |
| 35052 hsa-mir-125b-2 | AC007848. 2 | 0. 337037923 mirna_lnc |
| 35053 hsa-mir-125b-2 | AC010336. 2 | 0. 386844478 mirna_lnc |
| 35054 hsa-mir-125b-2 | AC092127. 2 | 0. 324281309 mirna_lnc |
| 35055 hsa-mir-125b-2 | AC073389. 2 | 0. 424194282 mirna_lnc |
| 35056 hsa-mir-125b-2 | AL031658. 1 | 0. 564166412 mirna_lnc |
| 35057 hsa-mir-125b-2 | AC010997. 4 | 0. 598065424 mirna_lnc |
| 35058 hsa-mir-125b-2 | HCG14       | 0. 334457442 mirna_lnc |
| 35059 hsa-mir-125b-2 | AC068473. 5 | 0. 344349596 mirna_lnc |
| 35060 hsa-mir-125b-2 | AC010997. 5 | 0. 340149839 mirna_lnc |
| 35061 hsa-mir-125b-2 | HM13-AS1    | 0. 352005245 mirna_lnc |
| 35062 hsa-mir-125b-2 | AC092849. 1 | 0. 340920611 mirna_lnc |
| 35063 hsa-mir-125b-2 | TTC39C-AS1  | 0. 59088976 mirna_lnc  |
| 35064 hsa-mir-125b-2 | KLHL7-DT    | 0. 303374852 mirna_lnc |
| 35065 hsa-mir-125b-2 | AP000962. 1 | 0. 555129948 mirna_lnc |
| 35066 hsa-mir-125b-2 | RB1-DT      | 0. 366718915 mirna_lnc |
| 35067 hsa-mir-125b-2 | AC023632. 2 | 0. 335619743 mirna_lnc |
| 35068 hsa-mir-125b-2 | PAN3-AS1    | 0. 443066979 mirna_lnc |
| 35069 hsa-mir-125b-2 | AC092447. 5 | 0. 5799183 mirna_lnc   |
| 35070 hsa-mir-125b-2 | AC006511. 3 | 0. 40197334 mirna_lnc  |
| 35071 hsa-mir-125b-2 | AC010336. 5 | 0. 645476331 mirna_lnc |
| 35072 hsa-mir-125b-2 | AP000251. 1 | 0. 316160842 mirna_lnc |
| 35073 hsa-mir-125b-2 | AC107464. 3 | 0. 611882515 mirna_lnc |
| 35074 hsa-mir-125b-2 | AC106038. 1 | 0. 30383616 mirna_lnc  |
| 35075 hsa-mir-125b-2 | AL513534. 2 | 0. 417388008 mirna_lnc |
| 35076 hsa-mir-125b-2 | AC019131. 1 | 0. 337300129 mirna_lnc |
| 35077 hsa-mir-125b-2 | AC025219. 1 | 0. 332306923 mirna_lnc |
| 35078 hsa-mir-125b-2 | LINC01901   | 0. 647370118 mirna_lnc |
| 35079 hsa-mir-125b-2 | AC022400. 8 | 0. 370063491 mirna_lnc |
| 35080 hsa-mir-125b-2 | AC004584. 3 | 0. 334985172 mirna_lnc |
| 35081 hsa-mir-125b-2 | AC107032. 2 | 0. 36265594 mirna_lnc  |
| 35082 hsa-mir-125b-2 | LINC01465   | 0. 424812226 mirna_lnc |
| 35083 hsa-mir-125b-2 | AC008763. 1 | 0. 309823112 mirna_lnc |
| 35084 hsa-mir-125b-2 | ZNF503-AS2  | 0. 422167268 mirna_lnc |
| 35085 hsa-mir-125b-2 | AL158063. 1 | 0. 339536737 mirna_lnc |
| 35086 hsa-mir-125b-2 | ERVK9-11    | 0. 379807575 mirna_lnc |
| 35087 hsa-mir-125b-2 | AC120057. 4 | 0. 306494625 mirna_lnc |
| 35088 hsa-mir-125b-2 | AL139397. 1 | 0. 30102662 mirna_lnc  |
| 35089 hsa-mir-125b-2 | AP000962. 2 | 0. 588087772 mirna_lnc |
| 35090 hsa-mir-125b-2 | AL121574. 1 | 0. 326178427 mirna_lnc |
| 35091 hsa-mir-125b-2 | AL512625. 1 | 0. 356701566 mirna_lnc |
| 35092 hsa-mir-125b-2 | LINC01144   | 0. 398141683 mirna_lnc |
| 35093 hsa-mir-125b-2 | AL008721. 1 | 0. 357879869 mirna_lnc |
| 35094 hsa-mir-125b-2 | AF127577. 5 | 0. 529508514 mirna_lnc |
| 35095 hsa-mir-125b-2 | FGF12-AS3   | 0. 446126814 mirna_lnc |
| 35096 hsa-mir-125b-2 | AC092119. 2 | 0. 331889599 mirna_lnc |
| 35097 hsa-mir-125b-2 | AL355490. 2 | 0. 377590424 mirna_lnc |
| 35098 hsa-mir-125b-2 | AC079610. 1 | 0. 326610393 mirna_lnc |
| 35099 hsa-mir-125b-2 | SMC2-AS1    | 0. 547303201 mirna_lnc |

|                      |            |                       |
|----------------------|------------|-----------------------|
| 35100 hsa-mir-125b-2 | AC110619.1 | 0.326956358 mirna_lnc |
| 35101 hsa-mir-125b-2 | AC107068.1 | 0.412597597 mirna_lnc |
| 35102 hsa-mir-125b-2 | AC090579.1 | 0.380595583 mirna_lnc |
| 35103 hsa-mir-125b-2 | MANEA-DT   | 0.360977363 mirna_lnc |
| 35104 hsa-mir-125b-2 | AL049796.1 | 0.351449222 mirna_lnc |
| 35105 hsa-mir-125b-2 | AL136531.1 | 0.352030598 mirna_lnc |
| 35106 hsa-mir-125b-2 | AC133550.2 | 0.333668252 mirna_lnc |
| 35107 hsa-mir-125b-2 | AL451062.1 | 0.334145901 mirna_lnc |
| 35108 hsa-mir-125b-2 | MAGEA8-AS1 | 0.635247319 mirna_lnc |
| 35109 hsa-mir-125b-2 | AC116348.1 | 0.338684425 mirna_lnc |
| 35110 hsa-mir-125b-2 | AC004925.1 | 0.560304285 mirna_lnc |
| 35111 hsa-mir-125b-2 | Z99129.3   | 0.476930162 mirna_lnc |
| 35112 hsa-mir-125b-2 | AC093462.1 | 0.323518944 mirna_lnc |
| 35113 hsa-mir-125b-2 | AP000350.5 | 0.618991787 mirna_lnc |
| 35114 hsa-mir-125b-2 | AC073389.3 | 0.628967879 mirna_lnc |
| 35115 hsa-mir-125b-2 | LINC01970  | 0.307267482 mirna_lnc |
| 35116 hsa-mir-125b-2 | AL583808.1 | 0.316165263 mirna_lnc |
| 35117 hsa-mir-125b-2 | AC011005.4 | 0.402570619 mirna_lnc |
| 35118 hsa-mir-125b-2 | AC104794.2 | 0.356438155 mirna_lnc |
| 35119 hsa-mir-125b-2 | MAPT-IT1   | 0.597775074 mirna_lnc |
| 35120 hsa-mir-125b-2 | AL627171.1 | 0.319729604 mirna_lnc |
| 35121 hsa-mir-125b-2 | ZKSCAN2-DT | 0.303673243 mirna_lnc |
| 35122 hsa-mir-125b-2 | AP001266.2 | 0.348908516 mirna_lnc |
| 35123 hsa-mir-125b-2 | AL451069.1 | 0.373764219 mirna_lnc |
| 35124 hsa-mir-125b-2 | AC009312.1 | 0.421652874 mirna_lnc |
| 35125 hsa-mir-125b-2 | AC098484.2 | 0.343975541 mirna_lnc |
| 35126 hsa-mir-125b-2 | AP000350.7 | 0.552861775 mirna_lnc |
| 35127 hsa-mir-125b-2 | AL096701.3 | 0.338197247 mirna_lnc |
| 35128 hsa-mir-125b-2 | AC079414.3 | 0.449321886 mirna_lnc |
| 35129 hsa-mir-125b-2 | AP002364.1 | 0.31302816 mirna_lnc  |
| 35130 hsa-mir-125b-2 | AC020978.1 | 0.378746956 mirna_lnc |
| 35131 hsa-mir-125b-2 | AL138831.3 | 0.478519042 mirna_lnc |
| 35132 hsa-mir-125b-2 | AC017100.1 | 0.416362984 mirna_lnc |
| 35133 hsa-mir-125b-2 | AC079601.1 | 0.355356922 mirna_lnc |
| 35134 hsa-mir-125b-2 | AL138831.2 | 0.532572684 mirna_lnc |
| 35135 hsa-mir-125b-2 | LINC01447  | 0.37197711 mirna_lnc  |
| 35136 hsa-mir-125b-2 | LINC00173  | 0.353745846 mirna_lnc |
| 35137 hsa-mir-125b-2 | AC005006.1 | 0.363652617 mirna_lnc |
| 35138 hsa-mir-125b-2 | AL645608.6 | 0.635081635 mirna_lnc |
| 35139 hsa-mir-125b-2 | LINC01694  | 0.310248309 mirna_lnc |
| 35140 hsa-mir-125b-2 | AL451064.2 | 0.726273933 mirna_lnc |
| 35141 hsa-mir-125b-2 | AC231981.1 | 0.324906405 mirna_lnc |
| 35142 hsa-mir-125b-2 | AL353726.2 | 0.534116704 mirna_lnc |
| 35143 hsa-mir-125b-2 | AC009148.1 | 0.323346464 mirna_lnc |
| 35144 hsa-mir-125b-2 | SPACA6P-AS | 0.636914699 mirna_lnc |
| 35145 hsa-mir-125b-2 | AC090061.1 | 0.495777301 mirna_lnc |
| 35146 hsa-mir-125b-2 | AC055855.2 | 0.33453904 mirna_lnc  |
| 35147 hsa-mir-125b-2 | AC073573.1 | 0.329976484 mirna_lnc |
| 35148 hsa-mir-125b-2 | AC104109.2 | 0.357601254 mirna_lnc |
| 35149 hsa-mir-125b-2 | LINC02652  | 0.402525202 mirna_lnc |
| 35150 hsa-mir-125b-2 | AC010834.3 | 0.307573217 mirna_lnc |
| 35151 hsa-mir-125b-2 | AC007497.1 | 0.436964203 mirna_lnc |
| 35152 hsa-mir-125b-2 | AL137003.2 | 0.421180124 mirna_lnc |
| 35153 hsa-mir-125b-2 | L29074.1   | 0.58240373 mirna_lnc  |

|                      |             |                       |
|----------------------|-------------|-----------------------|
| 35154 hsa-mir-125b-2 | AC145423.2  | 0.320331421 mirna_lnc |
| 35155 hsa-mir-125b-2 | FAM160A1-DT | 0.409558935 mirna_lnc |
| 35156 hsa-mir-125b-2 | AC140125.2  | 0.330921655 mirna_lnc |
| 35157 hsa-mir-125b-2 | AL359541.1  | 0.503432192 mirna_lnc |
| 35158 hsa-mir-125b-2 | RN7SL832P   | 0.342826747 mirna_lnc |
| 35159 hsa-mir-125b-2 | AL157931.1  | 0.794877128 mirna_lnc |
| 35160 hsa-mir-125b-2 | AL133255.1  | 0.398319171 mirna_lnc |
| 35161 hsa-mir-125b-2 | AL354919.1  | 0.792169733 mirna_lnc |
| 35162 hsa-mir-125b-2 | AC116348.2  | 0.349325218 mirna_lnc |
| 35163 hsa-mir-125b-2 | AL662791.1  | 0.463034793 mirna_lnc |
| 35164 hsa-mir-125b-2 | AC103996.2  | 0.414381429 mirna_lnc |
| 35165 hsa-mir-125b-2 | AL031716.1  | 0.314822666 mirna_lnc |
| 35166 hsa-mir-125b-2 | AC008555.1  | 0.336646158 mirna_lnc |
| 35167 hsa-mir-125b-2 | AL158211.1  | 0.341529336 mirna_lnc |
| 35168 hsa-mir-125b-2 | AC009084.2  | 0.35218692 mirna_lnc  |
| 35169 hsa-mir-125b-2 | AL135791.1  | 0.527648975 mirna_lnc |
| 35170 hsa-mir-125b-2 | AL161729.4  | 0.386755283 mirna_lnc |
| 35171 hsa-mir-125b-2 | AL022341.2  | 0.398974681 mirna_lnc |
| 35172 hsa-mir-125b-2 | AC009113.1  | 0.359362952 mirna_lnc |
| 35173 hsa-mir-125b-2 | AC083843.2  | 0.397590072 mirna_lnc |
| 35174 hsa-mir-125b-2 | AL645608.2  | 0.657080191 mirna_lnc |
| 35175 hsa-mir-125b-2 | AC010735.2  | 0.532256961 mirna_lnc |
| 35176 hsa-mir-125b-2 | AC079610.2  | 0.317508431 mirna_lnc |
| 35177 hsa-mir-125b-2 | AP001412.1  | 0.357415508 mirna_lnc |
| 35178 hsa-mir-125b-2 | AL024498.1  | 0.597898552 mirna_lnc |
| 35179 hsa-mir-125b-2 | AC100793.3  | 0.368724575 mirna_lnc |
| 35180 hsa-mir-125b-2 | AC012456.2  | 0.303212543 mirna_lnc |
| 35181 hsa-mir-125b-2 | AC100793.2  | 0.322383656 mirna_lnc |
| 35182 hsa-mir-125b-2 | AC007663.4  | 0.511115312 mirna_lnc |
| 35183 hsa-mir-125b-2 | AC087683.2  | 0.331261229 mirna_lnc |
| 35184 hsa-mir-125b-2 | AL138921.1  | 0.347312496 mirna_lnc |
| 35185 hsa-mir-125b-2 | AC008734.1  | 0.410575508 mirna_lnc |
| 35186 hsa-mir-125b-2 | AC137767.1  | 0.447944457 mirna_lnc |
| 35187 hsa-mir-19b-2  | AL035461.2  | 0.340157775 mirna_lnc |
| 35188 hsa-mir-19b-2  | AL161891.1  | 0.387098217 mirna_lnc |
| 35189 hsa-mir-19b-2  | AC131009.3  | 0.313152095 mirna_lnc |
| 35190 hsa-mir-19b-2  | AC024940.6  | 0.375992662 mirna_lnc |
| 35191 hsa-mir-19b-2  | AC073857.1  | 0.303903699 mirna_lnc |
| 35192 hsa-mir-19b-2  | LINC02367   | 0.316841791 mirna_lnc |
| 35193 hsa-mir-19b-2  | AL139089.1  | 0.307795586 mirna_lnc |
| 35194 hsa-mir-19b-2  | AC099518.2  | 0.335321721 mirna_lnc |
| 35195 hsa-mir-19b-2  | AL390728.6  | 0.331058114 mirna_lnc |
| 35196 hsa-mir-19b-2  | UBR5-AS1    | 0.308114445 mirna_lnc |
| 35197 hsa-mir-19b-2  | DNAJC3-DT   | 0.326935721 mirna_lnc |
| 35198 hsa-mir-19b-2  | RNASEH1-AS1 | 0.302082916 mirna_lnc |
| 35199 hsa-mir-19b-2  | AC011773.1  | 0.307187947 mirna_lnc |
| 35200 hsa-mir-19b-2  | AL022324.3  | 0.301056025 mirna_lnc |
| 35201 hsa-mir-19b-2  | LINC01433   | 0.305672901 mirna_lnc |
| 35202 hsa-mir-19b-2  | MCF2L-AS1   | 0.317321835 mirna_lnc |
| 35203 hsa-mir-19b-2  | AL138767.3  | 0.321296406 mirna_lnc |
| 35204 hsa-mir-19b-2  | ETV5-AS1    | 0.303593706 mirna_lnc |
| 35205 hsa-mir-19b-2  | AC005046.1  | 0.38693404 mirna_lnc  |
| 35206 hsa-mir-19b-2  | AL118511.1  | 0.329619139 mirna_lnc |
| 35207 hsa-mir-19b-2  | AP003392.3  | 0.338267438 mirna_lnc |



|                     |             |                       |
|---------------------|-------------|-----------------------|
| 35208 hsa-mir-19b-2 | AC106820.4  | 0.322473354 mirna_lnc |
| 35209 hsa-mir-19b-2 | AC005034.3  | 0.320167448 mirna_lnc |
| 35210 hsa-mir-19b-2 | AC007038.2  | 0.303742787 mirna_lnc |
| 35211 hsa-mir-19b-2 | LINC00456   | 0.34287183 mirna_lnc  |
| 35212 hsa-mir-19b-2 | AL049646.1  | 0.319306679 mirna_lnc |
| 35213 hsa-mir-19b-2 | AC112491.1  | 0.324786835 mirna_lnc |
| 35214 hsa-mir-19b-2 | PSPC1-AS2   | 0.347902121 mirna_lnc |
| 35215 hsa-mir-134   | LINC00163   | 0.338293116 mirna_lnc |
| 35216 hsa-mir-134   | AC108174.1  | 0.515027033 mirna_lnc |
| 35217 hsa-mir-134   | AC018653.3  | 0.309773119 mirna_lnc |
| 35218 hsa-mir-134   | CLEC12A-AS1 | 0.321273356 mirna_lnc |
| 35219 hsa-mir-134   | LINC01338   | 0.321302624 mirna_lnc |
| 35220 hsa-mir-134   | LINC01524   | 0.37508836 mirna_lnc  |
| 35221 hsa-mir-134   | FER1L6-AS2  | 0.332720022 mirna_lnc |
| 35222 hsa-mir-134   | TBX5-AS1    | 0.385811107 mirna_lnc |
| 35223 hsa-mir-134   | MAGEA4-AS1  | 0.307245294 mirna_lnc |
| 35224 hsa-mir-134   | AC092535.4  | 0.30492879 mirna_lnc  |
| 35225 hsa-mir-134   | TTLL11-IT1  | 0.308307234 mirna_lnc |
| 35226 hsa-mir-134   | AC026495.1  | 0.388077872 mirna_lnc |
| 35227 hsa-mir-134   | AC008063.1  | 0.366215066 mirna_lnc |
| 35228 hsa-mir-134   | AL035446.1  | 0.473864288 mirna_lnc |
| 35229 hsa-mir-134   | AC108865.1  | 0.494874323 mirna_lnc |
| 35230 hsa-mir-134   | AC025183.2  | 0.306930787 mirna_lnc |
| 35231 hsa-mir-134   | AC027307.1  | 0.325253804 mirna_lnc |
| 35232 hsa-mir-134   | AC021028.1  | 0.358201205 mirna_lnc |
| 35233 hsa-mir-134   | CFAP58-DT   | 0.393637735 mirna_lnc |
| 35234 hsa-mir-134   | AL031123.3  | 0.318480159 mirna_lnc |
| 35235 hsa-mir-134   | PICSAR      | 0.717264887 mirna_lnc |
| 35236 hsa-mir-134   | AC012370.1  | 0.310847998 mirna_lnc |
| 35237 hsa-mir-134   | LINC00165   | 0.738424499 mirna_lnc |
| 35238 hsa-mir-134   | AC023310.4  | 0.619747298 mirna_lnc |
| 35239 hsa-mir-134   | AC078820.1  | 0.326755851 mirna_lnc |
| 35240 hsa-mir-134   | AL445483.1  | 0.418169094 mirna_lnc |
| 35241 hsa-mir-484   | AC092718.4  | 0.345433564 mirna_lnc |
| 35242 hsa-mir-484   | AC012073.1  | 0.339784786 mirna_lnc |
| 35243 hsa-mir-484   | AP000708.1  | 0.37811999 mirna_lnc  |
| 35244 hsa-mir-484   | TYMSOS      | 0.36750734 mirna_lnc  |
| 35245 hsa-mir-484   | LINC02595   | 0.376170223 mirna_lnc |
| 35246 hsa-mir-484   | AL662797.1  | 0.391271148 mirna_lnc |
| 35247 hsa-mir-484   | LINC01873   | 0.390006176 mirna_lnc |
| 35248 hsa-mir-484   | TMPO-AS1    | 0.395388142 mirna_lnc |
| 35249 hsa-mir-484   | AC009630.2  | 0.365034367 mirna_lnc |
| 35250 hsa-mir-484   | AC011511.5  | 0.312796626 mirna_lnc |
| 35251 hsa-mir-484   | AL121832.2  | 0.401833346 mirna_lnc |
| 35252 hsa-mir-484   | AC103591.3  | 0.436962938 mirna_lnc |
| 35253 hsa-mir-484   | AC020658.4  | 0.302182963 mirna_lnc |
| 35254 hsa-mir-484   | AC004241.3  | 0.478750197 mirna_lnc |
| 35255 hsa-mir-484   | AL117332.1  | 0.382527174 mirna_lnc |
| 35256 hsa-mir-484   | SCAT2       | 0.34130002 mirna_lnc  |
| 35257 hsa-mir-484   | AL133338.1  | 0.317075132 mirna_lnc |
| 35258 hsa-mir-484   | CEP83-DT    | 0.36617587 mirna_lnc  |
| 35259 hsa-mir-484   | HOXC-AS2    | 0.305494668 mirna_lnc |
| 35260 hsa-mir-484   | AL049539.1  | 0.329952435 mirna_lnc |
| 35261 hsa-mir-484   | AL590326.1  | 0.312763913 mirna_lnc |

|                   |            |                       |
|-------------------|------------|-----------------------|
| 35262 hsa-mir-484 | JARID2-AS1 | 0.515732386 mirna_lnc |
| 35263 hsa-mir-484 | AC106820.3 | 0.300364373 mirna_lnc |
| 35264 hsa-mir-484 | AC016065.1 | 0.353973028 mirna_lnc |
| 35265 hsa-mir-484 | AC074117.1 | 0.44368658 mirna_lnc  |
| 35266 hsa-mir-484 | AP001469.3 | 0.324963754 mirna_lnc |
| 35267 hsa-mir-484 | AL031667.3 | 0.462091214 mirna_lnc |
| 35268 hsa-mir-484 | TFAP2A-AS1 | 0.39416537 mirna_lnc  |
| 35269 hsa-mir-484 | LINC02601  | 0.308490538 mirna_lnc |
| 35270 hsa-mir-484 | DLGAP1-AS2 | 0.326751585 mirna_lnc |
| 35271 hsa-mir-484 | AL024507.2 | 0.355942083 mirna_lnc |
| 35272 hsa-mir-484 | AC096656.1 | 0.317123582 mirna_lnc |
| 35273 hsa-mir-484 | LINC02542  | 0.333777488 mirna_lnc |
| 35274 hsa-mir-484 | AC009121.2 | 0.441790632 mirna_lnc |
| 35275 hsa-mir-484 | AC010894.2 | 0.352178305 mirna_lnc |
| 35276 hsa-mir-484 | AC092159.2 | 0.320148488 mirna_lnc |
| 35277 hsa-mir-484 | AC005840.2 | 0.373956472 mirna_lnc |
| 35278 hsa-mir-484 | AL023803.3 | 0.411922498 mirna_lnc |
| 35279 hsa-mir-484 | AC017083.1 | 0.439039235 mirna_lnc |
| 35280 hsa-mir-484 | AL121655.1 | 0.343799682 mirna_lnc |
| 35281 hsa-mir-484 | AC009121.1 | 0.412572753 mirna_lnc |
| 35282 hsa-mir-484 | AC109322.1 | 0.36067181 mirna_lnc  |
| 35283 hsa-mir-484 | LINC01952  | 0.360783517 mirna_lnc |
| 35284 hsa-mir-484 | AC107081.2 | 0.368780947 mirna_lnc |
| 35285 hsa-mir-484 | PLCH1-AS2  | 0.439637692 mirna_lnc |
| 35286 hsa-mir-484 | AC074351.1 | 0.383175222 mirna_lnc |
| 35287 hsa-mir-484 | AL592301.1 | 0.366743965 mirna_lnc |
| 35288 hsa-mir-484 | AC108134.2 | 0.307630157 mirna_lnc |
| 35289 hsa-mir-484 | AC079907.1 | 0.354643296 mirna_lnc |
| 35290 hsa-mir-484 | AC023157.3 | 0.350330516 mirna_lnc |
| 35291 hsa-mir-484 | AP002478.1 | 0.345456828 mirna_lnc |
| 35292 hsa-mir-484 | AC104472.1 | 0.305336352 mirna_lnc |
| 35293 hsa-mir-484 | AC064807.1 | 0.361563953 mirna_lnc |
| 35294 hsa-mir-484 | AC006329.1 | 0.31855257 mirna_lnc  |
| 35295 hsa-mir-484 | AL137802.2 | 0.322470168 mirna_lnc |
| 35296 hsa-mir-484 | AC087289.3 | 0.346067204 mirna_lnc |
| 35297 hsa-mir-484 | LINC01806  | 0.335247055 mirna_lnc |
| 35298 hsa-mir-484 | AC007292.1 | 0.369363248 mirna_lnc |
| 35299 hsa-mir-484 | AL136162.1 | 0.528409305 mirna_lnc |
| 35300 hsa-mir-484 | LINC02367  | 0.331404042 mirna_lnc |
| 35301 hsa-mir-484 | AC073195.1 | 0.389706861 mirna_lnc |
| 35302 hsa-mir-484 | AC015818.2 | 0.336285957 mirna_lnc |
| 35303 hsa-mir-484 | AL596094.1 | 0.452321311 mirna_lnc |
| 35304 hsa-mir-484 | AC004069.1 | 0.44704134 mirna_lnc  |
| 35305 hsa-mir-484 | AC131025.1 | 0.331644216 mirna_lnc |
| 35306 hsa-mir-484 | AC078788.1 | 0.333796971 mirna_lnc |
| 35307 hsa-mir-484 | AC004920.1 | 0.45152975 mirna_lnc  |
| 35308 hsa-mir-484 | AC021683.3 | 0.499310645 mirna_lnc |
| 35309 hsa-mir-484 | AC012360.3 | 0.33221343 mirna_lnc  |
| 35310 hsa-mir-484 | AC109992.2 | 0.309622614 mirna_lnc |
| 35311 hsa-mir-484 | AC097372.2 | 0.367563759 mirna_lnc |
| 35312 hsa-mir-484 | AC016394.2 | 0.339529299 mirna_lnc |
| 35313 hsa-mir-484 | AC010359.1 | 0.334233686 mirna_lnc |
| 35314 hsa-mir-484 | AC012640.2 | 0.390183147 mirna_lnc |
| 35315 hsa-mir-484 | AC090970.2 | 0.390418694 mirna_lnc |

|                   |                 |                       |
|-------------------|-----------------|-----------------------|
| 35316 hsa-mir-484 | AC110285.6      | 0.307192775 mirna_lnc |
| 35317 hsa-mir-484 | AC026782.2      | 0.438588811 mirna_lnc |
| 35318 hsa-mir-484 | HOXC-AS3        | 0.338724626 mirna_lnc |
| 35319 hsa-mir-484 | AP003119.2      | 0.330206402 mirna_lnc |
| 35320 hsa-mir-484 | AP000640.2      | 0.31324634 mirna_lnc  |
| 35321 hsa-mir-484 | ILF3-DT         | 0.36756913 mirna_lnc  |
| 35322 hsa-mir-484 | AC025244.1      | 0.307861774 mirna_lnc |
| 35323 hsa-mir-484 | AC012625.1      | 0.341222984 mirna_lnc |
| 35324 hsa-mir-484 | AL353764.1      | 0.409148944 mirna_lnc |
| 35325 hsa-mir-484 | LINC01220       | 0.304841181 mirna_lnc |
| 35326 hsa-mir-484 | AC013400.1      | 0.386192868 mirna_lnc |
| 35327 hsa-mir-484 | LINC01424       | 0.460459946 mirna_lnc |
| 35328 hsa-mir-484 | AC099518.1      | 0.372109457 mirna_lnc |
| 35329 hsa-mir-484 | AC022211.4      | 0.344987802 mirna_lnc |
| 35330 hsa-mir-484 | TBC1D8-AS1      | 0.376635957 mirna_lnc |
| 35331 hsa-mir-484 | AP000487.1      | 0.314990364 mirna_lnc |
| 35332 hsa-mir-484 | TIPARP-AS1      | 0.337242819 mirna_lnc |
| 35333 hsa-mir-484 | KIAA1614-AS1    | 0.424024036 mirna_lnc |
| 35334 hsa-mir-484 | AC016876.3      | 0.466946778 mirna_lnc |
| 35335 hsa-mir-484 | AL031665.2      | 0.415833791 mirna_lnc |
| 35336 hsa-mir-484 | AC092287.1      | 0.310846027 mirna_lnc |
| 35337 hsa-mir-484 | AC079684.1      | 0.328319454 mirna_lnc |
| 35338 hsa-mir-484 | AL163051.1      | 0.445650385 mirna_lnc |
| 35339 hsa-mir-484 | AL513327.2      | 0.399886075 mirna_lnc |
| 35340 hsa-mir-484 | IQCJ-SCHIP1-AS1 | 0.341007262 mirna_lnc |
| 35341 hsa-mir-484 | AL356488.2      | 0.30594675 mirna_lnc  |
| 35342 hsa-mir-484 | AC138356.1      | 0.442479942 mirna_lnc |
| 35343 hsa-mir-484 | LINC01850       | 0.44933519 mirna_lnc  |
| 35344 hsa-mir-484 | AC007952.4      | 0.495199934 mirna_lnc |
| 35345 hsa-mir-484 | AC005670.1      | 0.342815506 mirna_lnc |
| 35346 hsa-mir-484 | AP000593.3      | 0.353243389 mirna_lnc |
| 35347 hsa-mir-484 | WWTR1-AS1       | 0.301277428 mirna_lnc |
| 35348 hsa-mir-484 | MIR583HG        | 0.315502396 mirna_lnc |
| 35349 hsa-mir-484 | AL445228.2      | 0.352105674 mirna_lnc |
| 35350 hsa-mir-484 | AC002550.1      | 0.491270554 mirna_lnc |
| 35351 hsa-mir-484 | AC239799.1      | 0.355337508 mirna_lnc |
| 35352 hsa-mir-484 | AC010595.1      | 0.366290921 mirna_lnc |
| 35353 hsa-mir-484 | AL391069.3      | 0.398466989 mirna_lnc |
| 35354 hsa-mir-484 | LINC02607       | 0.41183098 mirna_lnc  |
| 35355 hsa-mir-484 | AL592071.1      | 0.341114244 mirna_lnc |
| 35356 hsa-mir-484 | LINC01816       | 0.481965536 mirna_lnc |
| 35357 hsa-mir-484 | AL121652.1      | 0.334288389 mirna_lnc |
| 35358 hsa-mir-484 | SREBF2-AS1      | 0.37369321 mirna_lnc  |
| 35359 hsa-mir-484 | AC099518.6      | 0.511854324 mirna_lnc |
| 35360 hsa-mir-484 | AF129075.2      | 0.369412069 mirna_lnc |
| 35361 hsa-mir-484 | AC007881.3      | 0.459624553 mirna_lnc |
| 35362 hsa-mir-484 | AL121658.1      | 0.404310876 mirna_lnc |
| 35363 hsa-mir-484 | AC010969.2      | 0.432963316 mirna_lnc |
| 35364 hsa-mir-484 | AC022098.3      | 0.396715138 mirna_lnc |
| 35365 hsa-mir-484 | AC005332.1      | 0.336108155 mirna_lnc |
| 35366 hsa-mir-484 | LINC00167       | 0.471249446 mirna_lnc |
| 35367 hsa-mir-484 | AC100812.1      | 0.336408861 mirna_lnc |
| 35368 hsa-mir-484 | AC004943.3      | 0.452805452 mirna_lnc |
| 35369 hsa-mir-484 | AC046143.2      | 0.341335814 mirna_lnc |

|                   |             |                       |
|-------------------|-------------|-----------------------|
| 35370 hsa-mir-484 | AC145343.1  | 0.422775548 mirna_lnc |
| 35371 hsa-mir-484 | AC093424.1  | 0.427759739 mirna_lnc |
| 35372 hsa-mir-484 | AC091925.1  | 0.378194731 mirna_lnc |
| 35373 hsa-mir-484 | AC117382.2  | 0.493571559 mirna_lnc |
| 35374 hsa-mir-484 | AC091153.3  | 0.509800855 mirna_lnc |
| 35375 hsa-mir-484 | AC063948.1  | 0.417038998 mirna_lnc |
| 35376 hsa-mir-484 | AC087742.1  | 0.401594336 mirna_lnc |
| 35377 hsa-mir-484 | AL354892.2  | 0.416703083 mirna_lnc |
| 35378 hsa-mir-484 | AL139327.2  | 0.347293195 mirna_lnc |
| 35379 hsa-mir-484 | DDX39B-AS1  | 0.388363352 mirna_lnc |
| 35380 hsa-mir-484 | AL031963.3  | 0.317262637 mirna_lnc |
| 35381 hsa-mir-484 | AC106820.2  | 0.306241433 mirna_lnc |
| 35382 hsa-mir-484 | AC012510.1  | 0.310803386 mirna_lnc |
| 35383 hsa-mir-484 | AC064836.3  | 0.405438852 mirna_lnc |
| 35384 hsa-mir-484 | AC011290.1  | 0.300350796 mirna_lnc |
| 35385 hsa-mir-484 | AC109326.1  | 0.347721354 mirna_lnc |
| 35386 hsa-mir-484 | AC012640.5  | 0.345864818 mirna_lnc |
| 35387 hsa-mir-484 | AL512408.1  | 0.359134269 mirna_lnc |
| 35388 hsa-mir-484 | AC090527.3  | 0.398977522 mirna_lnc |
| 35389 hsa-mir-484 | AC010422.2  | 0.384495682 mirna_lnc |
| 35390 hsa-mir-484 | AC010275.1  | 0.346169333 mirna_lnc |
| 35391 hsa-mir-484 | RNASEH1-AS1 | 0.33251216 mirna_lnc  |
| 35392 hsa-mir-484 | LINC01063   | 0.477795226 mirna_lnc |
| 35393 hsa-mir-484 | AC092669.1  | 0.334738887 mirna_lnc |
| 35394 hsa-mir-484 | CIRBP-AS1   | 0.346251615 mirna_lnc |
| 35395 hsa-mir-484 | AP000525.1  | 0.310071397 mirna_lnc |
| 35396 hsa-mir-484 | TBL1XR1-AS1 | 0.379163723 mirna_lnc |
| 35397 hsa-mir-484 | AC020765.2  | 0.372605454 mirna_lnc |
| 35398 hsa-mir-484 | AC084757.2  | 0.404394376 mirna_lnc |
| 35399 hsa-mir-484 | AC040169.3  | 0.356373146 mirna_lnc |
| 35400 hsa-mir-484 | EIF2AK3-DT  | 0.337744121 mirna_lnc |
| 35401 hsa-mir-484 | AC009171.2  | 0.411457096 mirna_lnc |
| 35402 hsa-mir-484 | AC084876.2  | 0.314801137 mirna_lnc |
| 35403 hsa-mir-484 | AC243830.2  | 0.377034444 mirna_lnc |
| 35404 hsa-mir-484 | AC068831.6  | 0.335660856 mirna_lnc |
| 35405 hsa-mir-484 | AL355482.2  | 0.336953156 mirna_lnc |
| 35406 hsa-mir-484 | AC080013.5  | 0.358110345 mirna_lnc |
| 35407 hsa-mir-484 | AL645608.4  | 0.312983666 mirna_lnc |
| 35408 hsa-mir-484 | AC008115.1  | 0.339311907 mirna_lnc |
| 35409 hsa-mir-484 | AC138696.2  | 0.382528158 mirna_lnc |
| 35410 hsa-mir-484 | AC007448.3  | 0.310404654 mirna_lnc |
| 35411 hsa-mir-484 | LINC02163   | 0.310168339 mirna_lnc |
| 35412 hsa-mir-484 | MAST4-AS1   | 0.302952482 mirna_lnc |
| 35413 hsa-mir-484 | LINC00884   | 0.301515737 mirna_lnc |
| 35414 hsa-mir-484 | AC010654.1  | 0.382126233 mirna_lnc |
| 35415 hsa-mir-484 | AC090774.2  | 0.371910401 mirna_lnc |
| 35416 hsa-mir-484 | MCCC1-AS1   | 0.381464436 mirna_lnc |
| 35417 hsa-mir-484 | AC007773.1  | 0.308084769 mirna_lnc |
| 35418 hsa-mir-484 | ATXN2-AS    | 0.328654619 mirna_lnc |
| 35419 hsa-mir-484 | AC022762.1  | 0.397883919 mirna_lnc |
| 35420 hsa-mir-484 | AL031600.2  | 0.361469801 mirna_lnc |
| 35421 hsa-mir-484 | AL133243.3  | 0.305611914 mirna_lnc |
| 35422 hsa-mir-484 | AC008267.5  | 0.35856625 mirna_lnc  |
| 35423 hsa-mir-484 | AC005076.1  | 0.335483168 mirna_lnc |

|                   |             |                        |
|-------------------|-------------|------------------------|
| 35424 hsa-mir-484 | AP001178. 3 | 0. 315412256 mirna_lnc |
| 35425 hsa-mir-484 | AC005695. 3 | 0. 318595259 mirna_lnc |
| 35426 hsa-mir-484 | AC107214. 1 | 0. 357134732 mirna_lnc |
| 35427 hsa-mir-484 | AC034236. 2 | 0. 322610017 mirna_lnc |
| 35428 hsa-mir-484 | AC131235. 3 | 0. 343946452 mirna_lnc |
| 35429 hsa-mir-484 | LINC01971   | 0. 344025799 mirna_lnc |
| 35430 hsa-mir-484 | AC073896. 4 | 0. 388751556 mirna_lnc |
| 35431 hsa-mir-484 | AP005328. 2 | 0. 344041109 mirna_lnc |
| 35432 hsa-mir-484 | DDR1-DT     | 0. 372221414 mirna_lnc |
| 35433 hsa-mir-484 | AC108865. 1 | 0. 3227901 mirna_lnc   |
| 35434 hsa-mir-484 | URB1-AS1    | 0. 377181756 mirna_lnc |
| 35435 hsa-mir-484 | AC024243. 1 | 0. 316549486 mirna_lnc |
| 35436 hsa-mir-484 | AC011446. 1 | 0. 397903479 mirna_lnc |
| 35437 hsa-mir-484 | AL132712. 2 | 0. 34291329 mirna_lnc  |
| 35438 hsa-mir-484 | AC008736. 2 | 0. 354555941 mirna_lnc |
| 35439 hsa-mir-484 | AC091271. 1 | 0. 380537796 mirna_lnc |
| 35440 hsa-mir-484 | AC006435. 4 | 0. 306746225 mirna_lnc |
| 35441 hsa-mir-484 | AC026304. 1 | 0. 489345905 mirna_lnc |
| 35442 hsa-mir-484 | AC096992. 2 | 0. 343859297 mirna_lnc |
| 35443 hsa-mir-484 | AC113410. 3 | 0. 331627934 mirna_lnc |
| 35444 hsa-mir-484 | AC010186. 1 | 0. 446262641 mirna_lnc |
| 35445 hsa-mir-484 | ELDR        | 0. 465612718 mirna_lnc |
| 35446 hsa-mir-484 | AC090617. 5 | 0. 337139057 mirna_lnc |
| 35447 hsa-mir-484 | AC019129. 2 | 0. 406420589 mirna_lnc |
| 35448 hsa-mir-484 | AC005790. 1 | 0. 454390026 mirna_lnc |
| 35449 hsa-mir-484 | AC002310. 1 | 0. 308975747 mirna_lnc |
| 35450 hsa-mir-484 | AP001775. 2 | 0. 400321131 mirna_lnc |
| 35451 hsa-mir-484 | AL132712. 1 | 0. 370329008 mirna_lnc |
| 35452 hsa-mir-484 | AC023355. 1 | 0. 356172884 mirna_lnc |
| 35453 hsa-mir-484 | AC093677. 2 | 0. 465082147 mirna_lnc |
| 35454 hsa-mir-484 | AC006111. 2 | 0. 362656427 mirna_lnc |
| 35455 hsa-mir-484 | AL135905. 1 | 0. 306631882 mirna_lnc |
| 35456 hsa-mir-484 | AC090907. 2 | 0. 37304304 mirna_lnc  |
| 35457 hsa-mir-484 | IQCA1-AS1   | 0. 372010658 mirna_lnc |
| 35458 hsa-mir-484 | INTS6L-AS1  | 0. 395272005 mirna_lnc |
| 35459 hsa-mir-484 | AP006545. 2 | 0. 313645736 mirna_lnc |
| 35460 hsa-mir-484 | AC083880. 1 | 0. 387994089 mirna_lnc |
| 35461 hsa-mir-484 | AL121601. 1 | 0. 364789879 mirna_lnc |
| 35462 hsa-mir-484 | AC099522. 2 | 0. 371280544 mirna_lnc |
| 35463 hsa-mir-484 | AC025741. 1 | 0. 347827914 mirna_lnc |
| 35464 hsa-mir-484 | AL135744. 1 | 0. 30885053 mirna_lnc  |
| 35465 hsa-mir-484 | AP001547. 1 | 0. 31729448 mirna_lnc  |
| 35466 hsa-mir-484 | LINC01607   | 0. 353913302 mirna_lnc |
| 35467 hsa-mir-484 | AP001160. 1 | 0. 343903275 mirna_lnc |
| 35468 hsa-mir-484 | AL136038. 3 | 0. 360639656 mirna_lnc |
| 35469 hsa-mir-484 | AC026979. 2 | 0. 301604869 mirna_lnc |
| 35470 hsa-mir-484 | AC007389. 5 | 0. 396849058 mirna_lnc |
| 35471 hsa-mir-484 | AC108865. 2 | 0. 451034034 mirna_lnc |
| 35472 hsa-mir-484 | AC010834. 2 | 0. 49781085 mirna_lnc  |
| 35473 hsa-mir-484 | AL022341. 1 | 0. 324233276 mirna_lnc |
| 35474 hsa-mir-484 | AC008883. 1 | 0. 333783062 mirna_lnc |
| 35475 hsa-mir-484 | AP000251. 1 | 0. 449328862 mirna_lnc |
| 35476 hsa-mir-484 | AC019131. 1 | 0. 304332246 mirna_lnc |
| 35477 hsa-mir-484 | AC025575. 2 | 0. 397681837 mirna_lnc |

|                   |            |                       |
|-------------------|------------|-----------------------|
| 35478 hsa-mir-484 | CPNE8-AS1  | 0.390742572 mirna_lnc |
| 35479 hsa-mir-484 | AL138881.1 | 0.472131392 mirna_lnc |
| 35480 hsa-mir-484 | AC036214.1 | 0.301347593 mirna_lnc |
| 35481 hsa-mir-484 | AC087276.3 | 0.353687827 mirna_lnc |
| 35482 hsa-mir-484 | AC090907.1 | 0.4402195 mirna_lnc   |
| 35483 hsa-mir-484 | AC093635.1 | 0.459329476 mirna_lnc |
| 35484 hsa-mir-484 | LINC01715  | 0.427554851 mirna_lnc |
| 35485 hsa-mir-484 | AC009560.1 | 0.303197116 mirna_lnc |
| 35486 hsa-mir-484 | AL590822.1 | 0.393086179 mirna_lnc |
| 35487 hsa-mir-484 | AC093510.1 | 0.349742756 mirna_lnc |
| 35488 hsa-mir-484 | BRWD1-AS2  | 0.308560362 mirna_lnc |
| 35489 hsa-mir-484 | AC006277.1 | 0.304294518 mirna_lnc |
| 35490 hsa-mir-484 | AL157813.1 | 0.353852992 mirna_lnc |
| 35491 hsa-mir-484 | AC027644.3 | 0.450534374 mirna_lnc |
| 35492 hsa-mir-484 | AGBL5-AS1  | 0.407416698 mirna_lnc |
| 35493 hsa-mir-484 | AC079174.2 | 0.313707255 mirna_lnc |
| 35494 hsa-mir-484 | AC007114.1 | 0.307478384 mirna_lnc |
| 35495 hsa-mir-484 | SCAT8      | 0.496397966 mirna_lnc |
| 35496 hsa-mir-484 | AL356488.3 | 0.475716982 mirna_lnc |
| 35497 hsa-mir-484 | AC002550.2 | 0.393603036 mirna_lnc |
| 35498 hsa-mir-484 | AC069277.1 | 0.324150098 mirna_lnc |
| 35499 hsa-mir-484 | AL032819.1 | 0.583516982 mirna_lnc |
| 35500 hsa-mir-484 | AP001439.1 | 0.306243399 mirna_lnc |
| 35501 hsa-mir-484 | AL844908.2 | 0.387009963 mirna_lnc |
| 35502 hsa-mir-484 | LINC01864  | 0.312349864 mirna_lnc |
| 35503 hsa-mir-484 | AC092119.3 | 0.479711983 mirna_lnc |
| 35504 hsa-mir-484 | AC069307.1 | 0.438230986 mirna_lnc |
| 35505 hsa-mir-484 | AC099343.3 | 0.355851471 mirna_lnc |
| 35506 hsa-mir-484 | HDAC4-AS1  | 0.348414057 mirna_lnc |
| 35507 hsa-mir-484 | LINC00485  | 0.335513505 mirna_lnc |
| 35508 hsa-mir-484 | AL021154.1 | 0.456276864 mirna_lnc |
| 35509 hsa-mir-484 | AL359198.1 | 0.331768326 mirna_lnc |
| 35510 hsa-mir-484 | AC004012.1 | 0.490312174 mirna_lnc |
| 35511 hsa-mir-484 | AL583808.1 | 0.392229143 mirna_lnc |
| 35512 hsa-mir-484 | AC068620.2 | 0.327328232 mirna_lnc |
| 35513 hsa-mir-484 | AP003392.3 | 0.433470467 mirna_lnc |
| 35514 hsa-mir-484 | Z93241.1   | 0.374462071 mirna_lnc |
| 35515 hsa-mir-484 | AL627171.1 | 0.32778823 mirna_lnc  |
| 35516 hsa-mir-484 | AC110285.2 | 0.378034354 mirna_lnc |
| 35517 hsa-mir-484 | AL359878.2 | 0.474856569 mirna_lnc |
| 35518 hsa-mir-484 | AC098484.2 | 0.303119957 mirna_lnc |
| 35519 hsa-mir-484 | AL731537.1 | 0.369103342 mirna_lnc |
| 35520 hsa-mir-484 | AC008443.3 | 0.302827805 mirna_lnc |
| 35521 hsa-mir-484 | AC012676.4 | 0.381940125 mirna_lnc |
| 35522 hsa-mir-484 | AC135178.5 | 0.354195575 mirna_lnc |
| 35523 hsa-mir-484 | KCNJ2-AS1  | 0.405769083 mirna_lnc |
| 35524 hsa-mir-484 | AC010096.1 | 0.358699118 mirna_lnc |
| 35525 hsa-mir-484 | AC107982.2 | 0.312797464 mirna_lnc |
| 35526 hsa-mir-484 | AC002059.1 | 0.493526858 mirna_lnc |
| 35527 hsa-mir-484 | AL645608.6 | 0.329054749 mirna_lnc |
| 35528 hsa-mir-484 | AC092652.1 | 0.384173168 mirna_lnc |
| 35529 hsa-mir-484 | AC000120.1 | 0.38870683 mirna_lnc  |
| 35530 hsa-mir-484 | AC131159.1 | 0.311286872 mirna_lnc |
| 35531 hsa-mir-484 | AC025162.2 | 0.380966324 mirna_lnc |

|                     |             |                       |
|---------------------|-------------|-----------------------|
| 35532 hsa-mir-484   | AC017104.3  | 0.302690527 mirna_lnc |
| 35533 hsa-mir-484   | LINC00311   | 0.306129945 mirna_lnc |
| 35534 hsa-mir-484   | AL365226.1  | 0.345518437 mirna_lnc |
| 35535 hsa-mir-484   | AC136604.3  | 0.331928843 mirna_lnc |
| 35536 hsa-mir-484   | AC011933.3  | 0.401311991 mirna_lnc |
| 35537 hsa-mir-484   | AC025287.2  | 0.306132519 mirna_lnc |
| 35538 hsa-mir-484   | AC130343.2  | 0.301220153 mirna_lnc |
| 35539 hsa-mir-484   | AC007497.1  | 0.382505809 mirna_lnc |
| 35540 hsa-mir-484   | AC005197.1  | 0.331639286 mirna_lnc |
| 35541 hsa-mir-484   | AC145423.2  | 0.387524693 mirna_lnc |
| 35542 hsa-mir-484   | AC073052.2  | 0.313554666 mirna_lnc |
| 35543 hsa-mir-484   | AC092142.1  | 0.404762088 mirna_lnc |
| 35544 hsa-mir-484   | AC007613.1  | 0.326380171 mirna_lnc |
| 35545 hsa-mir-484   | CYP51A1-AS1 | 0.52377985 mirna_lnc  |
| 35546 hsa-mir-484   | AC005696.4  | 0.325045129 mirna_lnc |
| 35547 hsa-mir-484   | AC005730.3  | 0.308770871 mirna_lnc |
| 35548 hsa-mir-484   | AL512791.2  | 0.321593437 mirna_lnc |
| 35549 hsa-mir-484   | RN7SL832P   | 0.50747994 mirna_lnc  |
| 35550 hsa-mir-484   | LINC02094   | 0.403700606 mirna_lnc |
| 35551 hsa-mir-484   | AL138966.2  | 0.35531556 mirna_lnc  |
| 35552 hsa-mir-484   | AL358933.1  | 0.374873696 mirna_lnc |
| 35553 hsa-mir-484   | AC068726.1  | 0.31944559 mirna_lnc  |
| 35554 hsa-mir-484   | AP001972.4  | 0.421115495 mirna_lnc |
| 35555 hsa-mir-484   | AL590705.3  | 0.465526898 mirna_lnc |
| 35556 hsa-mir-484   | AL596202.1  | 0.30953335 mirna_lnc  |
| 35557 hsa-mir-484   | AC106782.2  | 0.314347798 mirna_lnc |
| 35558 hsa-mir-484   | AC008752.1  | 0.315698111 mirna_lnc |
| 35559 hsa-mir-484   | AC106782.6  | 0.317055574 mirna_lnc |
| 35560 hsa-mir-484   | AC020663.3  | 0.344166965 mirna_lnc |
| 35561 hsa-mir-484   | AC015917.2  | 0.346361007 mirna_lnc |
| 35562 hsa-mir-484   | LINC01700   | 0.338941197 mirna_lnc |
| 35563 hsa-mir-484   | TOLLIP-AS1  | 0.31037568 mirna_lnc  |
| 35564 hsa-mir-484   | AL353708.1  | 0.306587626 mirna_lnc |
| 35565 hsa-mir-484   | SNHG9       | 0.377790197 mirna_lnc |
| 35566 hsa-mir-484   | AC108704.1  | 0.30135042 mirna_lnc  |
| 35567 hsa-mir-484   | AC012676.3  | 0.534183622 mirna_lnc |
| 35568 hsa-mir-1274b | AP001025.1  | 0.344303683 mirna_lnc |
| 35569 hsa-mir-1274b | AC118754.3  | 0.330653438 mirna_lnc |
| 35570 hsa-mir-1274b | AC005532.1  | 0.362073851 mirna_lnc |
| 35571 hsa-mir-1306  | AC012073.1  | 0.336837325 mirna_lnc |
| 35572 hsa-mir-1306  | TYMSOS      | 0.306473364 mirna_lnc |
| 35573 hsa-mir-1306  | TMPO-AS1    | 0.413349909 mirna_lnc |
| 35574 hsa-mir-1306  | CEP83-DT    | 0.313490768 mirna_lnc |
| 35575 hsa-mir-1306  | HOXC-AS2    | 0.414243632 mirna_lnc |
| 35576 hsa-mir-1306  | JARID2-AS1  | 0.341297416 mirna_lnc |
| 35577 hsa-mir-1306  | LINC01311   | 0.320680897 mirna_lnc |
| 35578 hsa-mir-1306  | AC074117.1  | 0.376997013 mirna_lnc |
| 35579 hsa-mir-1306  | LINC01385   | 0.327557458 mirna_lnc |
| 35580 hsa-mir-1306  | TFAP2A-AS1  | 0.459032302 mirna_lnc |
| 35581 hsa-mir-1306  | AL023803.3  | 0.34067104 mirna_lnc  |
| 35582 hsa-mir-1306  | AC074351.1  | 0.308626736 mirna_lnc |
| 35583 hsa-mir-1306  | AL445072.1  | 0.338916291 mirna_lnc |
| 35584 hsa-mir-1306  | AL137802.2  | 0.348186284 mirna_lnc |
| 35585 hsa-mir-1306  | AL136162.1  | 0.388262863 mirna_lnc |

|                    |              |                       |
|--------------------|--------------|-----------------------|
| 35586 hsa-mir-1306 | AC073195.1   | 0.352108382 mirna_lnc |
| 35587 hsa-mir-1306 | AC004069.1   | 0.304384808 mirna_lnc |
| 35588 hsa-mir-1306 | AC004920.1   | 0.303888042 mirna_lnc |
| 35589 hsa-mir-1306 | AC021683.3   | 0.345697649 mirna_lnc |
| 35590 hsa-mir-1306 | AL391069.2   | 0.320210695 mirna_lnc |
| 35591 hsa-mir-1306 | AC012640.2   | 0.363317745 mirna_lnc |
| 35592 hsa-mir-1306 | AC090970.2   | 0.308015787 mirna_lnc |
| 35593 hsa-mir-1306 | AL139023.1   | 0.39175392 mirna_lnc  |
| 35594 hsa-mir-1306 | AC002470.1   | 0.379473501 mirna_lnc |
| 35595 hsa-mir-1306 | ATP6V1B1-AS1 | 0.300539641 mirna_lnc |
| 35596 hsa-mir-1306 | AL031985.3   | 0.301236572 mirna_lnc |
| 35597 hsa-mir-1306 | AC013400.1   | 0.323390163 mirna_lnc |
| 35598 hsa-mir-1306 | AC138904.1   | 0.347020071 mirna_lnc |
| 35599 hsa-mir-1306 | LINC01424    | 0.402735851 mirna_lnc |
| 35600 hsa-mir-1306 | AL391152.1   | 0.316602411 mirna_lnc |
| 35601 hsa-mir-1306 | TBC1D8-AS1   | 0.317832689 mirna_lnc |
| 35602 hsa-mir-1306 | AC016876.3   | 0.367346239 mirna_lnc |
| 35603 hsa-mir-1306 | AL513327.2   | 0.362903136 mirna_lnc |
| 35604 hsa-mir-1306 | AC096887.2   | 0.377080573 mirna_lnc |
| 35605 hsa-mir-1306 | LINC01686    | 0.320687087 mirna_lnc |
| 35606 hsa-mir-1306 | Z95115.1     | 0.30852573 mirna_lnc  |
| 35607 hsa-mir-1306 | LINC01143    | 0.376395754 mirna_lnc |
| 35608 hsa-mir-1306 | AC010595.1   | 0.306778484 mirna_lnc |
| 35609 hsa-mir-1306 | LINC02607    | 0.329956061 mirna_lnc |
| 35610 hsa-mir-1306 | LINC01816    | 0.42393557 mirna_lnc  |
| 35611 hsa-mir-1306 | SREBF2-AS1   | 0.32646956 mirna_lnc  |
| 35612 hsa-mir-1306 | AC007881.3   | 0.345990893 mirna_lnc |
| 35613 hsa-mir-1306 | AL121658.1   | 0.333008887 mirna_lnc |
| 35614 hsa-mir-1306 | AC007996.1   | 0.3036929 mirna_lnc   |
| 35615 hsa-mir-1306 | LINC00167    | 0.31548396 mirna_lnc  |
| 35616 hsa-mir-1306 | LINC01521    | 0.302344515 mirna_lnc |
| 35617 hsa-mir-1306 | AC145343.1   | 0.31498209 mirna_lnc  |
| 35618 hsa-mir-1306 | AC093424.1   | 0.322590446 mirna_lnc |
| 35619 hsa-mir-1306 | AC091153.3   | 0.321844807 mirna_lnc |
| 35620 hsa-mir-1306 | AC063948.1   | 0.310243522 mirna_lnc |
| 35621 hsa-mir-1306 | AL354892.2   | 0.417777675 mirna_lnc |
| 35622 hsa-mir-1306 | AL139289.2   | 0.311914267 mirna_lnc |
| 35623 hsa-mir-1306 | AC016205.1   | 0.335855344 mirna_lnc |
| 35624 hsa-mir-1306 | AC064836.3   | 0.306720191 mirna_lnc |
| 35625 hsa-mir-1306 | AL512408.1   | 0.348887672 mirna_lnc |
| 35626 hsa-mir-1306 | AC090527.3   | 0.36627092 mirna_lnc  |
| 35627 hsa-mir-1306 | RNASEH1-AS1  | 0.348132362 mirna_lnc |
| 35628 hsa-mir-1306 | LINC01063    | 0.384431719 mirna_lnc |
| 35629 hsa-mir-1306 | CIRBP-AS1    | 0.306746903 mirna_lnc |
| 35630 hsa-mir-1306 | AC009171.2   | 0.304976647 mirna_lnc |
| 35631 hsa-mir-1306 | AL645608.4   | 0.338644547 mirna_lnc |
| 35632 hsa-mir-1306 | AC004471.1   | 0.384614778 mirna_lnc |
| 35633 hsa-mir-1306 | AC007773.1   | 0.307017165 mirna_lnc |
| 35634 hsa-mir-1306 | AC107214.1   | 0.362586621 mirna_lnc |
| 35635 hsa-mir-1306 | AL022324.3   | 0.327505897 mirna_lnc |
| 35636 hsa-mir-1306 | AC005005.3   | 0.372459459 mirna_lnc |
| 35637 hsa-mir-1306 | AC108865.1   | 0.323510081 mirna_lnc |
| 35638 hsa-mir-1306 | AC008736.2   | 0.324443906 mirna_lnc |
| 35639 hsa-mir-1306 | AC091271.1   | 0.322262121 mirna_lnc |



|                    |             |                        |
|--------------------|-------------|------------------------|
| 35640 hsa-mir-1306 | AL590399. 1 | 0. 305027733 mirna_lnc |
| 35641 hsa-mir-1306 | AC026304. 1 | 0. 307503645 mirna_lnc |
| 35642 hsa-mir-1306 | ELDR        | 0. 330275754 mirna_lnc |
| 35643 hsa-mir-1306 | AL132712. 1 | 0. 30095036 mirna_lnc  |
| 35644 hsa-mir-1306 | AC093677. 2 | 0. 305568781 mirna_lnc |
| 35645 hsa-mir-1306 | INTS6L-AS1  | 0. 302992836 mirna_lnc |
| 35646 hsa-mir-1306 | AC083880. 1 | 0. 333455155 mirna_lnc |
| 35647 hsa-mir-1306 | AC108865. 2 | 0. 345246214 mirna_lnc |
| 35648 hsa-mir-1306 | AC010834. 2 | 0. 327600594 mirna_lnc |
| 35649 hsa-mir-1306 | AP000251. 1 | 0. 43016809 mirna_lnc  |
| 35650 hsa-mir-1306 | LINC01901   | 0. 308783698 mirna_lnc |
| 35651 hsa-mir-1306 | AC090907. 1 | 0. 333145415 mirna_lnc |
| 35652 hsa-mir-1306 | AC093635. 1 | 0. 308981725 mirna_lnc |
| 35653 hsa-mir-1306 | LINC01715   | 0. 314958019 mirna_lnc |
| 35654 hsa-mir-1306 | AC027644. 3 | 0. 30024611 mirna_lnc  |
| 35655 hsa-mir-1306 | SCAT8       | 0. 308532213 mirna_lnc |
| 35656 hsa-mir-1306 | AL844908. 2 | 0. 301386627 mirna_lnc |
| 35657 hsa-mir-1306 | AL021154. 1 | 0. 319862923 mirna_lnc |
| 35658 hsa-mir-1306 | AC004012. 1 | 0. 313627005 mirna_lnc |
| 35659 hsa-mir-1306 | AL583808. 1 | 0. 431142655 mirna_lnc |
| 35660 hsa-mir-1306 | LINC02470   | 0. 322161184 mirna_lnc |
| 35661 hsa-mir-1306 | AC068338. 2 | 0. 317765218 mirna_lnc |
| 35662 hsa-mir-1306 | AL731537. 1 | 0. 309610851 mirna_lnc |
| 35663 hsa-mir-1306 | AC135178. 5 | 0. 313803018 mirna_lnc |
| 35664 hsa-mir-1306 | AL645608. 6 | 0. 351380967 mirna_lnc |
| 35665 hsa-mir-1306 | AC124068. 2 | 0. 356423724 mirna_lnc |
| 35666 hsa-mir-1306 | AC145423. 2 | 0. 341393631 mirna_lnc |
| 35667 hsa-mir-1306 | AC005696. 4 | 0. 325772906 mirna_lnc |
| 35668 hsa-mir-1306 | RN7SL832P   | 0. 316397999 mirna_lnc |
| 35669 hsa-mir-1306 | AL590705. 3 | 0. 316179247 mirna_lnc |
| 35670 hsa-mir-323  | AL590004. 3 | 0. 421102324 mirna_lnc |
| 35671 hsa-mir-323  | AC245100. 6 | 0. 490692183 mirna_lnc |
| 35672 hsa-mir-323  | AC092614. 1 | 0. 327512425 mirna_lnc |
| 35673 hsa-mir-323  | AC124303. 1 | 0. 71993004 mirna_lnc  |
| 35674 hsa-mir-323  | AL049539. 1 | 0. 309637405 mirna_lnc |
| 35675 hsa-mir-323  | AC027117. 2 | 0. 309654502 mirna_lnc |
| 35676 hsa-mir-323  | LINC02261   | 0. 358295672 mirna_lnc |
| 35677 hsa-mir-323  | AL133467. 2 | 0. 541027223 mirna_lnc |
| 35678 hsa-mir-323  | AC147651. 4 | 0. 360188471 mirna_lnc |
| 35679 hsa-mir-323  | AC090192. 2 | 0. 328323673 mirna_lnc |
| 35680 hsa-mir-323  | AC092112. 1 | 0. 329753138 mirna_lnc |
| 35681 hsa-mir-323  | LINC02003   | 0. 504727595 mirna_lnc |
| 35682 hsa-mir-323  | AC125257. 1 | 0. 332681773 mirna_lnc |
| 35683 hsa-mir-323  | AC004835. 1 | 0. 71024849 mirna_lnc  |
| 35684 hsa-mir-323  | AC024230. 1 | 0. 327703911 mirna_lnc |
| 35685 hsa-mir-323  | GK-IT1      | 0. 343028151 mirna_lnc |
| 35686 hsa-mir-323  | AC092535. 4 | 0. 337294393 mirna_lnc |
| 35687 hsa-mir-323  | AL358473. 1 | 0. 469423184 mirna_lnc |
| 35688 hsa-mir-323  | AC068831. 1 | 0. 305646979 mirna_lnc |
| 35689 hsa-mir-323  | AC096887. 2 | 0. 401643559 mirna_lnc |
| 35690 hsa-mir-323  | AC034102. 6 | 0. 462919894 mirna_lnc |
| 35691 hsa-mir-323  | AC024361. 2 | 0. 338895967 mirna_lnc |
| 35692 hsa-mir-323  | AF186192. 3 | 0. 42213353 mirna_lnc  |
| 35693 hsa-mir-323  | AF186192. 1 | 0. 557324619 mirna_lnc |

|                     |            |                       |
|---------------------|------------|-----------------------|
| 35694 hsa-mir-323   | AC011297.1 | 0.318048644 mirna_lnc |
| 35695 hsa-mir-323   | AC026495.1 | 0.38882256 mirna_lnc  |
| 35696 hsa-mir-323   | AL021578.1 | 0.324117385 mirna_lnc |
| 35697 hsa-mir-323   | AL031600.1 | 0.354217619 mirna_lnc |
| 35698 hsa-mir-323   | LINC01101  | 0.592021079 mirna_lnc |
| 35699 hsa-mir-323   | ADGRD1-AS1 | 0.342616438 mirna_lnc |
| 35700 hsa-mir-323   | AC002091.1 | 0.508338126 mirna_lnc |
| 35701 hsa-mir-323   | AC107926.1 | 0.334402669 mirna_lnc |
| 35702 hsa-mir-323   | AC090774.2 | 0.439073455 mirna_lnc |
| 35703 hsa-mir-323   | LINC02204  | 0.396758711 mirna_lnc |
| 35704 hsa-mir-323   | AC078925.4 | 0.32834229 mirna_lnc  |
| 35705 hsa-mir-323   | AL132712.2 | 0.320326118 mirna_lnc |
| 35706 hsa-mir-323   | AP006621.5 | 0.343192404 mirna_lnc |
| 35707 hsa-mir-323   | AC007638.2 | 0.355714765 mirna_lnc |
| 35708 hsa-mir-323   | AC090907.2 | 0.348599186 mirna_lnc |
| 35709 hsa-mir-323   | AC007384.1 | 0.317475256 mirna_lnc |
| 35710 hsa-mir-323   | AC023824.6 | 0.534465084 mirna_lnc |
| 35711 hsa-mir-323   | AL606970.1 | 0.324971524 mirna_lnc |
| 35712 hsa-mir-323   | AC068448.1 | 0.375538661 mirna_lnc |
| 35713 hsa-mir-323   | AP000842.3 | 0.310612705 mirna_lnc |
| 35714 hsa-mir-323   | AC000067.1 | 0.312230603 mirna_lnc |
| 35715 hsa-mir-323   | AL109917.1 | 0.364089167 mirna_lnc |
| 35716 hsa-mir-323   | INKA2-AS1  | 0.494256747 mirna_lnc |
| 35717 hsa-mir-323   | AC000036.1 | 0.313780357 mirna_lnc |
| 35718 hsa-mir-323   | AL049833.3 | 0.368931721 mirna_lnc |
| 35719 hsa-mir-323   | AC023796.2 | 0.363384858 mirna_lnc |
| 35720 hsa-mir-323   | PICSAR     | 0.313418462 mirna_lnc |
| 35721 hsa-mir-323   | AC099667.1 | 0.415149439 mirna_lnc |
| 35722 hsa-mir-323   | AC002091.2 | 0.454146966 mirna_lnc |
| 35723 hsa-mir-323   | AC078852.2 | 0.486482342 mirna_lnc |
| 35724 hsa-mir-323   | LINC02365  | 0.473066863 mirna_lnc |
| 35725 hsa-mir-323   | AC097652.1 | 0.350103807 mirna_lnc |
| 35726 hsa-mir-323   | LINC00165  | 0.32499394 mirna_lnc  |
| 35727 hsa-mir-323   | AL596442.2 | 0.519461561 mirna_lnc |
| 35728 hsa-mir-323   | AC008507.2 | 0.579350883 mirna_lnc |
| 35729 hsa-mir-323   | AL118511.1 | 0.476926093 mirna_lnc |
| 35730 hsa-mir-323   | AP003392.3 | 0.442700211 mirna_lnc |
| 35731 hsa-mir-323   | AL133351.1 | 0.349768109 mirna_lnc |
| 35732 hsa-mir-323   | AC010894.5 | 0.467527299 mirna_lnc |
| 35733 hsa-mir-323   | AC005006.1 | 0.64955892 mirna_lnc  |
| 35734 hsa-mir-323   | LINC00895  | 0.33021589 mirna_lnc  |
| 35735 hsa-mir-323   | AC133961.1 | 0.774925742 mirna_lnc |
| 35736 hsa-mir-323   | CD81-AS1   | 0.414437683 mirna_lnc |
| 35737 hsa-mir-323   | AL121835.2 | 0.311575957 mirna_lnc |
| 35738 hsa-mir-323   | AC010536.3 | 0.366291051 mirna_lnc |
| 35739 hsa-mir-323   | AC118758.3 | 0.593241853 mirna_lnc |
| 35740 hsa-mir-323   | AP001972.4 | 0.563194923 mirna_lnc |
| 35741 hsa-mir-323   | AC008760.2 | 0.30001557 mirna_lnc  |
| 35742 hsa-mir-323   | AP001476.1 | 0.445413503 mirna_lnc |
| 35743 hsa-mir-323   | AP001626.1 | 0.357559125 mirna_lnc |
| 35744 hsa-mir-323   | AP003973.2 | 0.326500209 mirna_lnc |
| 35745 hsa-mir-323   | AL356740.2 | 0.402157019 mirna_lnc |
| 35746 hsa-mir-511-2 | FAM225A    | 0.314466493 mirna_lnc |
| 35747 hsa-mir-511-2 | AC004988.1 | 0.352716034 mirna_lnc |

|                     |             |                       |
|---------------------|-------------|-----------------------|
| 35748 hsa-mir-511-2 | AC113346.1  | 0.305026387 mirna_lnc |
| 35749 hsa-mir-511-2 | AC124303.1  | 0.318171521 mirna_lnc |
| 35750 hsa-mir-511-2 | LINC01711   | 0.374622612 mirna_lnc |
| 35751 hsa-mir-511-2 | AC093388.1  | 0.350510999 mirna_lnc |
| 35752 hsa-mir-511-2 | LINC02154   | 0.359648848 mirna_lnc |
| 35753 hsa-mir-511-2 | LINC01546   | 0.387649623 mirna_lnc |
| 35754 hsa-mir-511-2 | AC069360.1  | 0.316249628 mirna_lnc |
| 35755 hsa-mir-511-2 | AL138724.1  | 0.416694721 mirna_lnc |
| 35756 hsa-mir-511-2 | LINC01179   | 0.334275807 mirna_lnc |
| 35757 hsa-mir-511-2 | AC004835.1  | 0.408030021 mirna_lnc |
| 35758 hsa-mir-511-2 | AC078788.1  | 0.307130448 mirna_lnc |
| 35759 hsa-mir-511-2 | AC061992.1  | 0.303810582 mirna_lnc |
| 35760 hsa-mir-511-2 | AL450322.2  | 0.421979081 mirna_lnc |
| 35761 hsa-mir-511-2 | AC109479.1  | 0.305053394 mirna_lnc |
| 35762 hsa-mir-511-2 | LINC01698   | 0.333875264 mirna_lnc |
| 35763 hsa-mir-511-2 | AC116021.1  | 0.308852841 mirna_lnc |
| 35764 hsa-mir-511-2 | AP000695.3  | 0.30448837 mirna_lnc  |
| 35765 hsa-mir-511-2 | AC002401.4  | 0.434405271 mirna_lnc |
| 35766 hsa-mir-511-2 | MYOSLID     | 0.335546807 mirna_lnc |
| 35767 hsa-mir-511-2 | PARAL1      | 0.426300619 mirna_lnc |
| 35768 hsa-mir-511-2 | AC009063.3  | 0.329127134 mirna_lnc |
| 35769 hsa-mir-511-2 | AC010327.3  | 0.33666308 mirna_lnc  |
| 35770 hsa-mir-511-2 | AC026495.1  | 0.306443866 mirna_lnc |
| 35771 hsa-mir-511-2 | AL359182.2  | 0.335717368 mirna_lnc |
| 35772 hsa-mir-511-2 | LINC02657   | 0.4432318 mirna_lnc   |
| 35773 hsa-mir-511-2 | AC124276.1  | 0.346151411 mirna_lnc |
| 35774 hsa-mir-511-2 | AC004816.2  | 0.371129289 mirna_lnc |
| 35775 hsa-mir-511-2 | AC002091.1  | 0.348848972 mirna_lnc |
| 35776 hsa-mir-511-2 | AC073130.3  | 0.392989565 mirna_lnc |
| 35777 hsa-mir-511-2 | AJ011932.1  | 0.369025455 mirna_lnc |
| 35778 hsa-mir-511-2 | AL135818.2  | 0.324191366 mirna_lnc |
| 35779 hsa-mir-511-2 | AL359091.5  | 0.332680084 mirna_lnc |
| 35780 hsa-mir-511-2 | AC019171.1  | 0.304840223 mirna_lnc |
| 35781 hsa-mir-511-2 | AL034399.2  | 0.344953289 mirna_lnc |
| 35782 hsa-mir-511-2 | AC108676.1  | 0.326950659 mirna_lnc |
| 35783 hsa-mir-511-2 | Z85994.1    | 0.364596675 mirna_lnc |
| 35784 hsa-mir-511-2 | HS1BP3-IT1  | 0.309817042 mirna_lnc |
| 35785 hsa-mir-511-2 | MIR31HG     | 0.302118371 mirna_lnc |
| 35786 hsa-mir-511-2 | AC099667.1  | 0.315046226 mirna_lnc |
| 35787 hsa-mir-511-2 | AC002091.2  | 0.348432944 mirna_lnc |
| 35788 hsa-mir-511-2 | AC010531.6  | 0.329726346 mirna_lnc |
| 35789 hsa-mir-511-2 | C9orf170    | 0.307425295 mirna_lnc |
| 35790 hsa-mir-511-2 | AC133961.1  | 0.351049995 mirna_lnc |
| 35791 hsa-mir-511-2 | AC080023.1  | 0.301960577 mirna_lnc |
| 35792 hsa-mir-511-2 | AC012065.3  | 0.332256848 mirna_lnc |
| 35793 hsa-mir-132   | FAM225A     | 0.453082827 mirna_lnc |
| 35794 hsa-mir-132   | C15orf54    | 0.363269371 mirna_lnc |
| 35795 hsa-mir-132   | SLC12A5-AS1 | 0.335328144 mirna_lnc |
| 35796 hsa-mir-132   | AC022387.1  | 0.354408347 mirna_lnc |
| 35797 hsa-mir-132   | AC026369.2  | 0.323722106 mirna_lnc |
| 35798 hsa-mir-132   | AC002066.1  | 0.339585585 mirna_lnc |
| 35799 hsa-mir-132   | AC104667.1  | 0.320350984 mirna_lnc |
| 35800 hsa-mir-132   | AC016596.1  | 0.307198332 mirna_lnc |
| 35801 hsa-mir-132   | AC034199.1  | 0.323391898 mirna_lnc |

|                   |            |                       |
|-------------------|------------|-----------------------|
| 35802 hsa-mir-132 | GK-IT1     | 0.353027224 mirna_lnc |
| 35803 hsa-mir-132 | MAGEA4-AS1 | 0.317002352 mirna_lnc |
| 35804 hsa-mir-132 | AC091931.1 | 0.330856758 mirna_lnc |
| 35805 hsa-mir-132 | AC112493.1 | 0.325845776 mirna_lnc |
| 35806 hsa-mir-132 | LINC01993  | 0.361181473 mirna_lnc |
| 35807 hsa-mir-132 | AC245128.3 | 0.32068281 mirna_lnc  |
| 35808 hsa-mir-132 | AC011773.4 | 0.302048 mirna_lnc    |
| 35809 hsa-mir-132 | ERICD      | 0.32183371 mirna_lnc  |
| 35810 hsa-mir-132 | DNM3-IT1   | 0.301497026 mirna_lnc |
| 35811 hsa-mir-132 | AL451064.1 | 0.346565826 mirna_lnc |
| 35812 hsa-mir-132 | AC090774.2 | 0.303189113 mirna_lnc |
| 35813 hsa-mir-132 | AC104072.1 | 0.317577061 mirna_lnc |
| 35814 hsa-mir-132 | AP003072.4 | 0.322046101 mirna_lnc |
| 35815 hsa-mir-132 | KLHL7-DT   | 0.395332895 mirna_lnc |
| 35816 hsa-mir-132 | AC010247.1 | 0.366137662 mirna_lnc |
| 35817 hsa-mir-132 | AL157702.2 | 0.314155785 mirna_lnc |
| 35818 hsa-mir-132 | AP000842.3 | 0.302757619 mirna_lnc |
| 35819 hsa-mir-132 | AL442067.2 | 0.317220499 mirna_lnc |
| 35820 hsa-mir-132 | ASAP1-IT2  | 0.327917851 mirna_lnc |
| 35821 hsa-mir-132 | AL139005.1 | 0.34301851 mirna_lnc  |
| 35822 hsa-mir-132 | FGF12-AS3  | 0.379603813 mirna_lnc |
| 35823 hsa-mir-132 | AC079610.1 | 0.359388126 mirna_lnc |
| 35824 hsa-mir-132 | AC004925.1 | 0.3015023 mirna_lnc   |
| 35825 hsa-mir-132 | AP001266.2 | 0.314150659 mirna_lnc |
| 35826 hsa-mir-132 | AC005224.3 | 0.34959645 mirna_lnc  |
| 35827 hsa-mir-132 | AC018946.1 | 0.30484575 mirna_lnc  |
| 35828 hsa-mir-132 | AL353726.2 | 0.346578791 mirna_lnc |
| 35829 hsa-mir-132 | SPACA6P-AS | 0.333409263 mirna_lnc |
| 35830 hsa-mir-132 | LINC00565  | 0.301994087 mirna_lnc |
| 35831 hsa-mir-132 | AL133342.1 | 0.390726418 mirna_lnc |
| 35832 hsa-mir-132 | AC005391.1 | 0.331257063 mirna_lnc |
| 35833 hsa-mir-132 | AC097468.2 | 0.322028276 mirna_lnc |
| 35834 hsa-mir-132 | AC068987.1 | 0.337260941 mirna_lnc |
| 35835 hsa-mir-132 | AC010735.2 | 0.348565873 mirna_lnc |
| 35836 hsa-mir-132 | AP001626.1 | 0.37624072 mirna_lnc  |
| 35837 hsa-mir-132 | BSN-DT     | 0.324323808 mirna_lnc |
| 35838 hsa-mir-616 | AC006026.3 | 0.444545583 mirna_lnc |
| 35839 hsa-mir-616 | AC074117.1 | 0.306128914 mirna_lnc |
| 35840 hsa-mir-616 | AC027117.2 | 0.308090918 mirna_lnc |
| 35841 hsa-mir-616 | LINC01419  | 0.333653875 mirna_lnc |
| 35842 hsa-mir-616 | LINC00567  | 0.728238029 mirna_lnc |
| 35843 hsa-mir-616 | AL118506.1 | 0.410237562 mirna_lnc |
| 35844 hsa-mir-616 | AC104667.2 | 0.509021448 mirna_lnc |
| 35845 hsa-mir-616 | LINC00896  | 0.336744264 mirna_lnc |
| 35846 hsa-mir-616 | AC027088.3 | 0.33829547 mirna_lnc  |
| 35847 hsa-mir-616 | HOXC-AS3   | 0.323348185 mirna_lnc |
| 35848 hsa-mir-616 | AC005831.1 | 0.415178471 mirna_lnc |
| 35849 hsa-mir-616 | AC006449.5 | 0.484178987 mirna_lnc |
| 35850 hsa-mir-616 | LINC02048  | 0.315152304 mirna_lnc |
| 35851 hsa-mir-616 | AL590666.2 | 0.364491512 mirna_lnc |
| 35852 hsa-mir-616 | AC090517.2 | 0.426957201 mirna_lnc |
| 35853 hsa-mir-616 | AC068580.2 | 0.60734302 mirna_lnc  |
| 35854 hsa-mir-616 | AC010624.1 | 0.60531532 mirna_lnc  |
| 35855 hsa-mir-616 | TMC01-AS1  | 0.383183714 mirna_lnc |

|                   |             |                       |
|-------------------|-------------|-----------------------|
| 35856 hsa-mir-616 | AL365181.3  | 0.300970615 mirna_lnc |
| 35857 hsa-mir-616 | AL121721.1  | 0.323066122 mirna_lnc |
| 35858 hsa-mir-616 | AL023803.1  | 0.412098363 mirna_lnc |
| 35859 hsa-mir-616 | AC024270.4  | 0.312824115 mirna_lnc |
| 35860 hsa-mir-616 | RNASEH1-AS1 | 0.304122221 mirna_lnc |
| 35861 hsa-mir-616 | LINC00336   | 0.436479433 mirna_lnc |
| 35862 hsa-mir-616 | AL352984.1  | 0.322133635 mirna_lnc |
| 35863 hsa-mir-616 | AC005722.2  | 0.54892215 mirna_lnc  |
| 35864 hsa-mir-616 | AC083900.1  | 0.417006362 mirna_lnc |
| 35865 hsa-mir-616 | AC004471.1  | 0.320867017 mirna_lnc |
| 35866 hsa-mir-616 | AL365181.2  | 0.417481148 mirna_lnc |
| 35867 hsa-mir-616 | AL137058.3  | 0.357751999 mirna_lnc |
| 35868 hsa-mir-616 | AC011389.2  | 0.363021295 mirna_lnc |
| 35869 hsa-mir-616 | AC005005.3  | 0.427455914 mirna_lnc |
| 35870 hsa-mir-616 | C11orf72    | 0.517547327 mirna_lnc |
| 35871 hsa-mir-616 | AC009779.2  | 0.437956752 mirna_lnc |
| 35872 hsa-mir-616 | LINC02292   | 0.558909551 mirna_lnc |
| 35873 hsa-mir-616 | AC008608.2  | 0.50777921 mirna_lnc  |
| 35874 hsa-mir-616 | LBX2-AS1    | 0.422851059 mirna_lnc |
| 35875 hsa-mir-616 | AC105137.2  | 0.313172777 mirna_lnc |
| 35876 hsa-mir-616 | AC012645.1  | 0.377640165 mirna_lnc |
| 35877 hsa-mir-616 | AL035420.3  | 0.559215484 mirna_lnc |
| 35878 hsa-mir-616 | AC116036.2  | 0.436598455 mirna_lnc |
| 35879 hsa-mir-616 | AC116025.2  | 0.532129179 mirna_lnc |
| 35880 hsa-mir-616 | CATIP-AS1   | 0.388264658 mirna_lnc |
| 35881 hsa-mir-616 | AC003965.1  | 0.394194138 mirna_lnc |
| 35882 hsa-mir-616 | AC110619.1  | 0.430162303 mirna_lnc |
| 35883 hsa-mir-616 | LINC02365   | 0.38616948 mirna_lnc  |
| 35884 hsa-mir-616 | LINC01979   | 0.367050798 mirna_lnc |
| 35885 hsa-mir-616 | AC117402.1  | 0.333991154 mirna_lnc |
| 35886 hsa-mir-616 | AP003419.3  | 0.54143018 mirna_lnc  |
| 35887 hsa-mir-616 | AC005336.3  | 0.320158495 mirna_lnc |
| 35888 hsa-mir-616 | AL451069.1  | 0.412660618 mirna_lnc |
| 35889 hsa-mir-616 | CEBPA-DT    | 0.310736009 mirna_lnc |
| 35890 hsa-mir-616 | AC004233.3  | 0.40071929 mirna_lnc  |
| 35891 hsa-mir-616 | LINC01169   | 0.302100914 mirna_lnc |
| 35892 hsa-mir-616 | AC006128.1  | 0.346809195 mirna_lnc |
| 35893 hsa-mir-616 | AC079848.1  | 0.338239861 mirna_lnc |
| 35894 hsa-mir-616 | AC009283.1  | 0.391731992 mirna_lnc |
| 35895 hsa-mir-616 | AC061975.6  | 0.327610222 mirna_lnc |
| 35896 hsa-mir-616 | MID1IP1-AS1 | 0.455189551 mirna_lnc |
| 35897 hsa-mir-616 | AC106782.2  | 0.318982528 mirna_lnc |
| 35898 hsa-mir-616 | AC006449.6  | 0.601608009 mirna_lnc |
| 35899 hsa-mir-616 | AC243836.1  | 0.441423601 mirna_lnc |
| 35900 hsa-mir-576 | AC025470.2  | 0.324205597 mirna_lnc |
| 35901 hsa-mir-576 | AC012073.1  | 0.35703082 mirna_lnc  |
| 35902 hsa-mir-576 | AC074117.1  | 0.358576688 mirna_lnc |
| 35903 hsa-mir-576 | AP001469.3  | 0.305165318 mirna_lnc |
| 35904 hsa-mir-576 | AC011199.1  | 0.386025644 mirna_lnc |
| 35905 hsa-mir-576 | AC063977.6  | 0.306121938 mirna_lnc |
| 35906 hsa-mir-576 | AP001469.2  | 0.339225621 mirna_lnc |
| 35907 hsa-mir-576 | LINC01494   | 0.302511098 mirna_lnc |
| 35908 hsa-mir-576 | OCIAD1-AS1  | 0.339068324 mirna_lnc |
| 35909 hsa-mir-576 | AC015849.5  | 0.30144998 mirna_lnc  |

|                   |             |                       |
|-------------------|-------------|-----------------------|
| 35910 hsa-mir-576 | LINC02367   | 0.353652577 mirna_lnc |
| 35911 hsa-mir-576 | LINC01096   | 0.359071578 mirna_lnc |
| 35912 hsa-mir-576 | AC012360.3  | 0.392600777 mirna_lnc |
| 35913 hsa-mir-576 | AC016705.2  | 0.366842738 mirna_lnc |
| 35914 hsa-mir-576 | AC116049.2  | 0.310859062 mirna_lnc |
| 35915 hsa-mir-576 | AL133243.2  | 0.40341224 mirna_lnc  |
| 35916 hsa-mir-576 | AC024230.1  | 0.389390646 mirna_lnc |
| 35917 hsa-mir-576 | AC138904.1  | 0.348716369 mirna_lnc |
| 35918 hsa-mir-576 | AP000487.1  | 0.36033852 mirna_lnc  |
| 35919 hsa-mir-576 | AP005432.2  | 0.326089829 mirna_lnc |
| 35920 hsa-mir-576 | AC010186.3  | 0.335871484 mirna_lnc |
| 35921 hsa-mir-576 | AC024270.4  | 0.399766258 mirna_lnc |
| 35922 hsa-mir-576 | AC090527.3  | 0.361131532 mirna_lnc |
| 35923 hsa-mir-576 | HGC6.3      | 0.420781401 mirna_lnc |
| 35924 hsa-mir-576 | AP002336.2  | 0.322638581 mirna_lnc |
| 35925 hsa-mir-576 | CAPN10-DT   | 0.34191046 mirna_lnc  |
| 35926 hsa-mir-576 | AC011773.1  | 0.371677126 mirna_lnc |
| 35927 hsa-mir-576 | AC069222.1  | 0.313198483 mirna_lnc |
| 35928 hsa-mir-576 | AC126407.1  | 0.309986155 mirna_lnc |
| 35929 hsa-mir-576 | TCF7L1-IT1  | 0.388634437 mirna_lnc |
| 35930 hsa-mir-576 | AC107214.1  | 0.382920779 mirna_lnc |
| 35931 hsa-mir-576 | AC107027.3  | 0.34275211 mirna_lnc  |
| 35932 hsa-mir-576 | AC005005.3  | 0.321856368 mirna_lnc |
| 35933 hsa-mir-576 | AP004782.1  | 0.316971499 mirna_lnc |
| 35934 hsa-mir-576 | AC093752.3  | 0.389911556 mirna_lnc |
| 35935 hsa-mir-576 | AL031186.1  | 0.432791943 mirna_lnc |
| 35936 hsa-mir-576 | AC046168.1  | 0.334444591 mirna_lnc |
| 35937 hsa-mir-576 | AC022509.2  | 0.30692659 mirna_lnc  |
| 35938 hsa-mir-576 | AC005865.1  | 0.413682432 mirna_lnc |
| 35939 hsa-mir-576 | ETV5-AS1    | 0.396978982 mirna_lnc |
| 35940 hsa-mir-576 | AC107068.1  | 0.358352146 mirna_lnc |
| 35941 hsa-mir-576 | AP001783.1  | 0.355000745 mirna_lnc |
| 35942 hsa-mir-576 | LINC02457   | 0.351994774 mirna_lnc |
| 35943 hsa-mir-576 | AC124254.1  | 0.307473364 mirna_lnc |
| 35944 hsa-mir-576 | AP000808.2  | 0.378161128 mirna_lnc |
| 35945 hsa-mir-576 | AC106820.4  | 0.365916683 mirna_lnc |
| 35946 hsa-mir-576 | LINC00173   | 0.305627047 mirna_lnc |
| 35947 hsa-mir-576 | AC004076.2  | 0.308213628 mirna_lnc |
| 35948 hsa-mir-576 | LINC01918   | 0.378346843 mirna_lnc |
| 35949 hsa-mir-576 | LINC00909   | 0.391932923 mirna_lnc |
| 35950 hsa-mir-576 | AL033527.2  | 0.429079808 mirna_lnc |
| 35951 hsa-mir-576 | AC093788.1  | 0.38880385 mirna_lnc  |
| 35952 hsa-mir-576 | FAM160A1-DT | 0.307027866 mirna_lnc |
| 35953 hsa-mir-576 | AC012313.9  | 0.344863362 mirna_lnc |
| 35954 hsa-mir-576 | AL358115.1  | 0.328773964 mirna_lnc |
| 35955 hsa-mir-576 | AC092718.5  | 0.353105746 mirna_lnc |
| 35956 hsa-mir-576 | AC097534.1  | 0.365384745 mirna_lnc |
| 35957 hsa-mir-576 | AL512343.2  | 0.304137058 mirna_lnc |
| 35958 hsa-mir-576 | AC011239.1  | 0.310988772 mirna_lnc |
| 35959 hsa-mir-576 | AC006487.1  | 0.326818412 mirna_lnc |
| 35960 hsa-mir-576 | UBXN7-AS1   | 0.302500583 mirna_lnc |
| 35961 hsa-mir-576 | AC007663.4  | 0.34659747 mirna_lnc  |
| 35962 hsa-mir-576 | AC108704.1  | 0.31574955 mirna_lnc  |
| 35963 hsa-mir-576 | AC009970.1  | 0.30273191 mirna_lnc  |

|                    |              |                        |
|--------------------|--------------|------------------------|
| 35964 hsa-mir-130b | AC092667. 1  | 0. 351840898 mirna_lnc |
| 35965 hsa-mir-130b | AC012073. 1  | 0. 397106041 mirna_lnc |
| 35966 hsa-mir-130b | TMPO-AS1     | 0. 419540739 mirna_lnc |
| 35967 hsa-mir-130b | AC020658. 4  | 0. 350838804 mirna_lnc |
| 35968 hsa-mir-130b | AP000808. 1  | 0. 417702984 mirna_lnc |
| 35969 hsa-mir-130b | AC092614. 1  | 0. 301586425 mirna_lnc |
| 35970 hsa-mir-130b | CEP83-DT     | 0. 339397668 mirna_lnc |
| 35971 hsa-mir-130b | HOXC-AS2     | 0. 345725767 mirna_lnc |
| 35972 hsa-mir-130b | AC074117. 1  | 0. 313413385 mirna_lnc |
| 35973 hsa-mir-130b | LINC01385    | 0. 304012346 mirna_lnc |
| 35974 hsa-mir-130b | AP003071. 2  | 0. 319381469 mirna_lnc |
| 35975 hsa-mir-130b | AC147651. 4  | 0. 35802867 mirna_lnc  |
| 35976 hsa-mir-130b | AC073195. 1  | 0. 357537093 mirna_lnc |
| 35977 hsa-mir-130b | LINC01096    | 0. 466335965 mirna_lnc |
| 35978 hsa-mir-130b | AL391069. 2  | 0. 350246731 mirna_lnc |
| 35979 hsa-mir-130b | AC116049. 2  | 0. 374022662 mirna_lnc |
| 35980 hsa-mir-130b | AL513497. 1  | 0. 309175582 mirna_lnc |
| 35981 hsa-mir-130b | ATP6V1B1-AS1 | 0. 302187873 mirna_lnc |
| 35982 hsa-mir-130b | AC109347. 2  | 0. 370526163 mirna_lnc |
| 35983 hsa-mir-130b | AL121578. 3  | 0. 309696308 mirna_lnc |
| 35984 hsa-mir-130b | AC024230. 1  | 0. 403854171 mirna_lnc |
| 35985 hsa-mir-130b | LINC01397    | 0. 313491299 mirna_lnc |
| 35986 hsa-mir-130b | AL031985. 3  | 0. 350669448 mirna_lnc |
| 35987 hsa-mir-130b | AC138904. 1  | 0. 478586732 mirna_lnc |
| 35988 hsa-mir-130b | AP000487. 1  | 0. 392657247 mirna_lnc |
| 35989 hsa-mir-130b | AC104971. 1  | 0. 344247945 mirna_lnc |
| 35990 hsa-mir-130b | LINC01686    | 0. 38000152 mirna_lnc  |
| 35991 hsa-mir-130b | LINC01143    | 0. 376878719 mirna_lnc |
| 35992 hsa-mir-130b | AC120114. 1  | 0. 304488641 mirna_lnc |
| 35993 hsa-mir-130b | AP001025. 1  | 0. 326889724 mirna_lnc |
| 35994 hsa-mir-130b | LINC01816    | 0. 319633951 mirna_lnc |
| 35995 hsa-mir-130b | SREBF2-AS1   | 0. 426800506 mirna_lnc |
| 35996 hsa-mir-130b | AC007996. 1  | 0. 31744392 mirna_lnc  |
| 35997 hsa-mir-130b | LINC01521    | 0. 307279398 mirna_lnc |
| 35998 hsa-mir-130b | AC044781. 1  | 0. 323648366 mirna_lnc |
| 35999 hsa-mir-130b | AC011297. 1  | 0. 463188255 mirna_lnc |
| 36000 hsa-mir-130b | AC004943. 3  | 0. 341196729 mirna_lnc |
| 36001 hsa-mir-130b | AC063948. 1  | 0. 300546894 mirna_lnc |
| 36002 hsa-mir-130b | AL354892. 2  | 0. 479290966 mirna_lnc |
| 36003 hsa-mir-130b | AC106820. 2  | 0. 352257911 mirna_lnc |
| 36004 hsa-mir-130b | AC026271. 3  | 0. 468447585 mirna_lnc |
| 36005 hsa-mir-130b | AC016205. 1  | 0. 456179189 mirna_lnc |
| 36006 hsa-mir-130b | PIK3CD-AS2   | 0. 345868317 mirna_lnc |
| 36007 hsa-mir-130b | MYB-AS1      | 0. 433983307 mirna_lnc |
| 36008 hsa-mir-130b | RNASEH1-AS1  | 0. 440395455 mirna_lnc |
| 36009 hsa-mir-130b | AP002387. 2  | 0. 311938315 mirna_lnc |
| 36010 hsa-mir-130b | AC131212. 4  | 0. 30560191 mirna_lnc  |
| 36011 hsa-mir-130b | AC092669. 1  | 0. 382278862 mirna_lnc |
| 36012 hsa-mir-130b | AP002336. 2  | 0. 38568942 mirna_lnc  |
| 36013 hsa-mir-130b | AC099568. 2  | 0. 312501366 mirna_lnc |
| 36014 hsa-mir-130b | AC145207. 5  | 0. 325543685 mirna_lnc |
| 36015 hsa-mir-130b | LINC02562    | 0. 342340978 mirna_lnc |
| 36016 hsa-mir-130b | AC008115. 1  | 0. 305392961 mirna_lnc |
| 36017 hsa-mir-130b | AC009271. 1  | 0. 32168625 mirna_lnc  |

|                      |             |                       |
|----------------------|-------------|-----------------------|
| 36018 hsa-mir-130b   | AC098818.2  | 0.36150719 mirna_lnc  |
| 36019 hsa-mir-130b   | AC104596.1  | 0.31508349 mirna_lnc  |
| 36020 hsa-mir-130b   | AC107214.1  | 0.366168565 mirna_lnc |
| 36021 hsa-mir-130b   | LINC00885   | 0.381945491 mirna_lnc |
| 36022 hsa-mir-130b   | AC079174.1  | 0.317495761 mirna_lnc |
| 36023 hsa-mir-130b   | AL157832.2  | 0.363678079 mirna_lnc |
| 36024 hsa-mir-130b   | AP000251.1  | 0.304313327 mirna_lnc |
| 36025 hsa-mir-130b   | AC098936.1  | 0.493341742 mirna_lnc |
| 36026 hsa-mir-130b   | ETV5-AS1    | 0.36145561 mirna_lnc  |
| 36027 hsa-mir-130b   | ZNF649-AS1  | 0.301839254 mirna_lnc |
| 36028 hsa-mir-130b   | AL118511.1  | 0.38368705 mirna_lnc  |
| 36029 hsa-mir-130b   | AP000808.2  | 0.311478659 mirna_lnc |
| 36030 hsa-mir-130b   | LINC02470   | 0.628743421 mirna_lnc |
| 36031 hsa-mir-130b   | AC135178.5  | 0.368517811 mirna_lnc |
| 36032 hsa-mir-130b   | AC106820.4  | 0.439760498 mirna_lnc |
| 36033 hsa-mir-130b   | AC005696.4  | 0.311601159 mirna_lnc |
| 36034 hsa-mir-130b   | AF213884.3  | 0.402115434 mirna_lnc |
| 36035 hsa-mir-130b   | AC008033.3  | 0.396554099 mirna_lnc |
| 36036 hsa-mir-130b   | CAMTA1-IT1  | 0.410149661 mirna_lnc |
| 36037 hsa-mir-320b-2 | SNHG3       | 0.320936738 mirna_lnc |
| 36038 hsa-mir-320b-2 | AC026401.3  | 0.301561179 mirna_lnc |
| 36039 hsa-mir-320b-2 | AC100861.1  | 0.371439969 mirna_lnc |
| 36040 hsa-mir-320b-2 | TMPO-AS1    | 0.310665875 mirna_lnc |
| 36041 hsa-mir-320b-2 | AC020658.4  | 0.321694376 mirna_lnc |
| 36042 hsa-mir-320b-2 | AL035461.2  | 0.341389396 mirna_lnc |
| 36043 hsa-mir-320b-2 | AC016065.1  | 0.352819895 mirna_lnc |
| 36044 hsa-mir-320b-2 | LINC01952   | 0.318832415 mirna_lnc |
| 36045 hsa-mir-320b-2 | AC008750.7  | 0.322484284 mirna_lnc |
| 36046 hsa-mir-320b-2 | AP000487.1  | 0.335078126 mirna_lnc |
| 36047 hsa-mir-320b-2 | AC104971.1  | 0.317675701 mirna_lnc |
| 36048 hsa-mir-320b-2 | EMC1-AS1    | 0.308822781 mirna_lnc |
| 36049 hsa-mir-320b-2 | RNASEH1-AS1 | 0.301900473 mirna_lnc |
| 36050 hsa-mir-320b-2 | AP002387.2  | 0.302618549 mirna_lnc |
| 36051 hsa-mir-320b-2 | AC131212.4  | 0.309365267 mirna_lnc |
| 36052 hsa-mir-320b-2 | AC145207.5  | 0.306844855 mirna_lnc |
| 36053 hsa-mir-320b-2 | AC136475.1  | 0.353633067 mirna_lnc |
| 36054 hsa-mir-320b-2 | AC007608.1  | 0.343299178 mirna_lnc |
| 36055 hsa-mir-320b-2 | AC026979.2  | 0.307091829 mirna_lnc |
| 36056 hsa-mir-320b-2 | AC098936.1  | 0.3054645 mirna_lnc   |
| 36057 hsa-mir-320b-2 | AL121989.1  | 0.350178071 mirna_lnc |
| 36058 hsa-mir-320b-2 | LINC02413   | 0.358362867 mirna_lnc |
| 36059 hsa-mir-320b-2 | LINC02470   | 0.458899278 mirna_lnc |
| 36060 hsa-mir-320b-2 | AC007608.2  | 0.375496936 mirna_lnc |
| 36061 hsa-mir-320b-2 | AP003068.1  | 0.316193042 mirna_lnc |
| 36062 hsa-mir-320b-2 | AC007608.4  | 0.459390029 mirna_lnc |
| 36063 hsa-mir-320b-2 | CAMTA1-IT1  | 0.342268659 mirna_lnc |
| 36064 hsa-let-7d     | AC020658.4  | 0.303407982 mirna_lnc |
| 36065 hsa-let-7d     | DDX11-AS1   | 0.32021459 mirna_lnc  |
| 36066 hsa-let-7d     | TFAP2A-AS1  | 0.322829607 mirna_lnc |
| 36067 hsa-let-7d     | AL441992.1  | 0.362055854 mirna_lnc |
| 36068 hsa-let-7d     | LINC02321   | 0.31099594 mirna_lnc  |
| 36069 hsa-let-7d     | MAN1B1-DT   | 0.347054797 mirna_lnc |
| 36070 hsa-let-7d     | AL513497.1  | 0.318681358 mirna_lnc |
| 36071 hsa-let-7d     | AC138904.1  | 0.310026192 mirna_lnc |



|                     |                 |                       |
|---------------------|-----------------|-----------------------|
| 36072 hsa-let-7d    | LINC01703       | 0.316348381 mirna_lnc |
| 36073 hsa-let-7d    | AC124067.2      | 0.318123626 mirna_lnc |
| 36074 hsa-let-7d    | AC099786.1      | 0.322211912 mirna_lnc |
| 36075 hsa-let-7d    | AL354892.2      | 0.315677177 mirna_lnc |
| 36076 hsa-let-7d    | AL139289.2      | 0.351100837 mirna_lnc |
| 36077 hsa-let-7d    | AC016205.1      | 0.331266967 mirna_lnc |
| 36078 hsa-let-7d    | ARRDC1-AS1      | 0.304101422 mirna_lnc |
| 36079 hsa-let-7d    | AP000251.1      | 0.352725455 mirna_lnc |
| 36080 hsa-let-7d    | LINC01901       | 0.369307468 mirna_lnc |
| 36081 hsa-let-7d    | AP000350.5      | 0.318381773 mirna_lnc |
| 36082 hsa-let-7d    | AP002360.1      | 0.33815757 mirna_lnc  |
| 36083 hsa-let-7d    | AL161729.4      | 0.319492188 mirna_lnc |
| 36084 hsa-let-7d    | AC010735.2      | 0.301572028 mirna_lnc |
| 36085 hsa-mir-450b  | AC012073.1      | 0.386899953 mirna_lnc |
| 36086 hsa-mir-450b  | TMPO-AS1        | 0.33478406 mirna_lnc  |
| 36087 hsa-mir-450b  | AP000808.1      | 0.317652586 mirna_lnc |
| 36088 hsa-mir-450b  | AC092614.1      | 0.33752502 mirna_lnc  |
| 36089 hsa-mir-450b  | AL121655.1      | 0.317473374 mirna_lnc |
| 36090 hsa-mir-450b  | AC091729.3      | 0.34335547 mirna_lnc  |
| 36091 hsa-mir-450b  | AL136162.1      | 0.319831946 mirna_lnc |
| 36092 hsa-mir-450b  | LINC01096       | 0.353321222 mirna_lnc |
| 36093 hsa-mir-450b  | AL391069.2      | 0.315988103 mirna_lnc |
| 36094 hsa-mir-450b  | AC012640.2      | 0.311816877 mirna_lnc |
| 36095 hsa-mir-450b  | AC116049.2      | 0.375855842 mirna_lnc |
| 36096 hsa-mir-450b  | AC024230.1      | 0.444482218 mirna_lnc |
| 36097 hsa-mir-450b  | LINC01424       | 0.321167575 mirna_lnc |
| 36098 hsa-mir-450b  | TBC1D8-AS1      | 0.328861276 mirna_lnc |
| 36099 hsa-mir-450b  | AL356274.2      | 0.30789234 mirna_lnc  |
| 36100 hsa-mir-450b  | IQCJ-SCHIP1-AS1 | 0.308662626 mirna_lnc |
| 36101 hsa-mir-450b  | LINC01686       | 0.305139862 mirna_lnc |
| 36102 hsa-mir-450b  | AC022079.1      | 0.324909495 mirna_lnc |
| 36103 hsa-mir-450b  | AC100812.1      | 0.304070906 mirna_lnc |
| 36104 hsa-mir-450b  | AC011297.1      | 0.34215693 mirna_lnc  |
| 36105 hsa-mir-450b  | AC016205.1      | 0.338721234 mirna_lnc |
| 36106 hsa-mir-450b  | AL512408.1      | 0.368893908 mirna_lnc |
| 36107 hsa-mir-450b  | LINC01063       | 0.302304555 mirna_lnc |
| 36108 hsa-mir-450b  | AP002336.2      | 0.376533015 mirna_lnc |
| 36109 hsa-mir-450b  | AC024560.3      | 0.305202523 mirna_lnc |
| 36110 hsa-mir-450b  | LPP-AS2         | 0.305611245 mirna_lnc |
| 36111 hsa-mir-450b  | AL132712.1      | 0.306593751 mirna_lnc |
| 36112 hsa-mir-450b  | AL135905.1      | 0.317182714 mirna_lnc |
| 36113 hsa-mir-450b  | AL844908.2      | 0.331023716 mirna_lnc |
| 36114 hsa-mir-450b  | AL359881.2      | 0.335607334 mirna_lnc |
| 36115 hsa-mir-450b  | AL118511.1      | 0.315337561 mirna_lnc |
| 36116 hsa-mir-450b  | AC106820.4      | 0.304796347 mirna_lnc |
| 36117 hsa-mir-450b  | AL359881.1      | 0.309952861 mirna_lnc |
| 36118 hsa-mir-450b  | AC008033.3      | 0.305114343 mirna_lnc |
| 36119 hsa-mir-92a-1 | TUSC8           | 0.314449427 mirna_lnc |
| 36120 hsa-mir-92a-1 | AC012073.1      | 0.317451975 mirna_lnc |
| 36121 hsa-mir-92a-1 | AC010761.2      | 0.341031039 mirna_lnc |
| 36122 hsa-mir-92a-1 | AL161891.1      | 0.469493382 mirna_lnc |
| 36123 hsa-mir-92a-1 | AL157932.1      | 0.300933477 mirna_lnc |
| 36124 hsa-mir-92a-1 | HOXC-AS2        | 0.324915091 mirna_lnc |
| 36125 hsa-mir-92a-1 | AC074117.1      | 0.320548336 mirna_lnc |

|                     |             |                       |
|---------------------|-------------|-----------------------|
| 36126 hsa-mir-92a-1 | AL356740.1  | 0.349903236 mirna_lnc |
| 36127 hsa-mir-92a-1 | AC021945.1  | 0.359221481 mirna_lnc |
| 36128 hsa-mir-92a-1 | AC015849.5  | 0.312542265 mirna_lnc |
| 36129 hsa-mir-92a-1 | AC006557.1  | 0.302484167 mirna_lnc |
| 36130 hsa-mir-92a-1 | AC125257.1  | 0.305505283 mirna_lnc |
| 36131 hsa-mir-92a-1 | AL109615.2  | 0.311003452 mirna_lnc |
| 36132 hsa-mir-92a-1 | AC008543.1  | 0.337599364 mirna_lnc |
| 36133 hsa-mir-92a-1 | AL139089.1  | 0.334891741 mirna_lnc |
| 36134 hsa-mir-92a-1 | AL355388.2  | 0.338226391 mirna_lnc |
| 36135 hsa-mir-92a-1 | AC005831.1  | 0.361310425 mirna_lnc |
| 36136 hsa-mir-92a-1 | AC138904.1  | 0.317686164 mirna_lnc |
| 36137 hsa-mir-92a-1 | LINC01460   | 0.401596043 mirna_lnc |
| 36138 hsa-mir-92a-1 | AC099518.2  | 0.325229762 mirna_lnc |
| 36139 hsa-mir-92a-1 | TRPM2-AS    | 0.321585553 mirna_lnc |
| 36140 hsa-mir-92a-1 | UBR5-AS1    | 0.331851074 mirna_lnc |
| 36141 hsa-mir-92a-1 | AC127024.5  | 0.30918973 mirna_lnc  |
| 36142 hsa-mir-92a-1 | DNAJC3-DT   | 0.404998801 mirna_lnc |
| 36143 hsa-mir-92a-1 | AL390961.3  | 0.302621753 mirna_lnc |
| 36144 hsa-mir-92a-1 | AC090527.3  | 0.336233298 mirna_lnc |
| 36145 hsa-mir-92a-1 | AC073508.3  | 0.32445839 mirna_lnc  |
| 36146 hsa-mir-92a-1 | AC007128.1  | 0.348174023 mirna_lnc |
| 36147 hsa-mir-92a-1 | RNASEH1-AS1 | 0.39348291 mirna_lnc  |
| 36148 hsa-mir-92a-1 | AL080317.2  | 0.303674658 mirna_lnc |
| 36149 hsa-mir-92a-1 | AL139082.1  | 0.385423806 mirna_lnc |
| 36150 hsa-mir-92a-1 | AC005224.1  | 0.355242044 mirna_lnc |
| 36151 hsa-mir-92a-1 | AC011773.1  | 0.35670139 mirna_lnc  |
| 36152 hsa-mir-92a-1 | AL442128.2  | 0.331814984 mirna_lnc |
| 36153 hsa-mir-92a-1 | AC145207.5  | 0.31014169 mirna_lnc  |
| 36154 hsa-mir-92a-1 | STAM-AS1    | 0.334326722 mirna_lnc |
| 36155 hsa-mir-92a-1 | AC007485.2  | 0.371404859 mirna_lnc |
| 36156 hsa-mir-92a-1 | AC068669.1  | 0.365060489 mirna_lnc |
| 36157 hsa-mir-92a-1 | AC124067.4  | 0.377083404 mirna_lnc |
| 36158 hsa-mir-92a-1 | AL137244.1  | 0.386888024 mirna_lnc |
| 36159 hsa-mir-92a-1 | AC026333.4  | 0.311191569 mirna_lnc |
| 36160 hsa-mir-92a-1 | AP006621.5  | 0.363796013 mirna_lnc |
| 36161 hsa-mir-92a-1 | AC011700.1  | 0.323262246 mirna_lnc |
| 36162 hsa-mir-92a-1 | AC112255.1  | 0.405179448 mirna_lnc |
| 36163 hsa-mir-92a-1 | AC116025.2  | 0.398228 mirna_lnc    |
| 36164 hsa-mir-92a-1 | MCF2L-AS1   | 0.433418202 mirna_lnc |
| 36165 hsa-mir-92a-1 | AL138767.3  | 0.350418931 mirna_lnc |
| 36166 hsa-mir-92a-1 | AC069234.5  | 0.311852232 mirna_lnc |
| 36167 hsa-mir-92a-1 | AC147651.2  | 0.355469137 mirna_lnc |
| 36168 hsa-mir-92a-1 | ZNF649-AS1  | 0.331354569 mirna_lnc |
| 36169 hsa-mir-92a-1 | AC107068.1  | 0.318251462 mirna_lnc |
| 36170 hsa-mir-92a-1 | LINC02365   | 0.355055642 mirna_lnc |
| 36171 hsa-mir-92a-1 | LINC01979   | 0.31685241 mirna_lnc  |
| 36172 hsa-mir-92a-1 | AP001273.1  | 0.331847335 mirna_lnc |
| 36173 hsa-mir-92a-1 | AL118511.1  | 0.373304849 mirna_lnc |
| 36174 hsa-mir-92a-1 | AC106820.4  | 0.304602329 mirna_lnc |
| 36175 hsa-mir-92a-1 | LINC02097   | 0.36568045 mirna_lnc  |
| 36176 hsa-mir-92a-1 | AC017100.1  | 0.305654812 mirna_lnc |
| 36177 hsa-mir-92a-1 | LINC00543   | 0.328102727 mirna_lnc |
| 36178 hsa-mir-92a-1 | AL161725.2  | 0.34061368 mirna_lnc  |
| 36179 hsa-mir-92a-1 | LINC02575   | 0.340173413 mirna_lnc |

|                     |             |                       |
|---------------------|-------------|-----------------------|
| 36180 hsa-mir-92a-1 | LINC00456   | 0.391143383 mirna_lnc |
| 36181 hsa-mir-92a-1 | AL049646.1  | 0.35568073 mirna_lnc  |
| 36182 hsa-mir-92a-1 | SLC04A1-AS1 | 0.315273957 mirna_lnc |
| 36183 hsa-mir-92a-1 | AL596202.1  | 0.318519206 mirna_lnc |
| 36184 hsa-mir-92a-1 | AC080112.3  | 0.336727133 mirna_lnc |
| 36185 hsa-mir-92a-1 | AL080317.1  | 0.303595845 mirna_lnc |
| 36186 hsa-mir-92a-1 | PSPC1-AS2   | 0.331317407 mirna_lnc |
| 36187 hsa-mir-92a-1 | AL512652.1  | 0.305704716 mirna_lnc |
| 36188 hsa-mir-92a-1 | AC114488.1  | 0.41513983 mirna_lnc  |
| 36189 hsa-mir-191   | AC103746.1  | 0.336168572 mirna_lnc |
| 36190 hsa-mir-191   | AC113398.2  | 0.307765969 mirna_lnc |
| 36191 hsa-mir-191   | AC129507.2  | 0.304875993 mirna_lnc |
| 36192 hsa-mir-191   | AL160286.2  | 0.303027744 mirna_lnc |
| 36193 hsa-mir-191   | LINC01560   | 0.330375823 mirna_lnc |
| 36194 hsa-mir-191   | TMPO-AS1    | 0.330228806 mirna_lnc |
| 36195 hsa-mir-191   | AC006252.1  | 0.32559335 mirna_lnc  |
| 36196 hsa-mir-191   | AL117382.2  | 0.349475859 mirna_lnc |
| 36197 hsa-mir-191   | AL391244.2  | 0.379753619 mirna_lnc |
| 36198 hsa-mir-191   | AL353194.1  | 0.353871873 mirna_lnc |
| 36199 hsa-mir-191   | AC002401.2  | 0.313934683 mirna_lnc |
| 36200 hsa-mir-191   | AC027228.2  | 0.378576528 mirna_lnc |
| 36201 hsa-mir-191   | LINC02585   | 0.516002472 mirna_lnc |
| 36202 hsa-mir-191   | LINC02038   | 0.30394431 mirna_lnc  |
| 36203 hsa-mir-191   | AC129507.3  | 0.38260231 mirna_lnc  |
| 36204 hsa-mir-191   | AC074117.1  | 0.341199597 mirna_lnc |
| 36205 hsa-mir-191   | AC027117.2  | 0.360411593 mirna_lnc |
| 36206 hsa-mir-191   | HNF4A-AS1   | 0.343794475 mirna_lnc |
| 36207 hsa-mir-191   | AC097532.2  | 0.302693582 mirna_lnc |
| 36208 hsa-mir-191   | LINC01419   | 0.384549142 mirna_lnc |
| 36209 hsa-mir-191   | AC022387.1  | 0.301219981 mirna_lnc |
| 36210 hsa-mir-191   | LINC00567   | 0.338074035 mirna_lnc |
| 36211 hsa-mir-191   | AC021945.1  | 0.307501364 mirna_lnc |
| 36212 hsa-mir-191   | AL133467.2  | 0.317624074 mirna_lnc |
| 36213 hsa-mir-191   | AC104667.1  | 0.312424879 mirna_lnc |
| 36214 hsa-mir-191   | AC008738.2  | 0.392270313 mirna_lnc |
| 36215 hsa-mir-191   | AL356299.2  | 0.310727967 mirna_lnc |
| 36216 hsa-mir-191   | PRC1-AS1    | 0.318826715 mirna_lnc |
| 36217 hsa-mir-191   | AL451050.2  | 0.36230543 mirna_lnc  |
| 36218 hsa-mir-191   | AC012467.1  | 0.501323923 mirna_lnc |
| 36219 hsa-mir-191   | AC104472.1  | 0.339107815 mirna_lnc |
| 36220 hsa-mir-191   | AL080317.3  | 0.319744801 mirna_lnc |
| 36221 hsa-mir-191   | AL137802.2  | 0.339000851 mirna_lnc |
| 36222 hsa-mir-191   | AC084125.4  | 0.300068822 mirna_lnc |
| 36223 hsa-mir-191   | AC009652.2  | 0.304590642 mirna_lnc |
| 36224 hsa-mir-191   | AC015849.5  | 0.311921091 mirna_lnc |
| 36225 hsa-mir-191   | AC104667.2  | 0.376033468 mirna_lnc |
| 36226 hsa-mir-191   | AL139424.1  | 0.309479839 mirna_lnc |
| 36227 hsa-mir-191   | AP000553.2  | 0.379415052 mirna_lnc |
| 36228 hsa-mir-191   | AC104958.2  | 0.396712145 mirna_lnc |
| 36229 hsa-mir-191   | AC009407.1  | 0.413043455 mirna_lnc |
| 36230 hsa-mir-191   | AL445686.2  | 0.31641591 mirna_lnc  |
| 36231 hsa-mir-191   | AC004080.2  | 0.315639689 mirna_lnc |
| 36232 hsa-mir-191   | AC010536.1  | 0.342451708 mirna_lnc |
| 36233 hsa-mir-191   | AC024884.2  | 0.338068896 mirna_lnc |

|                   |             |                       |
|-------------------|-------------|-----------------------|
| 36234 hsa-mir-191 | AC008543.1  | 0.477598766 mirna_lnc |
| 36235 hsa-mir-191 | AC026740.1  | 0.342596081 mirna_lnc |
| 36236 hsa-mir-191 | AC016394.2  | 0.318473577 mirna_lnc |
| 36237 hsa-mir-191 | RHPN1-AS1   | 0.313386033 mirna_lnc |
| 36238 hsa-mir-191 | AL139023.1  | 0.320048809 mirna_lnc |
| 36239 hsa-mir-191 | HOXC-AS3    | 0.379327602 mirna_lnc |
| 36240 hsa-mir-191 | LINC01087   | 0.517005697 mirna_lnc |
| 36241 hsa-mir-191 | AC135803.1  | 0.301915582 mirna_lnc |
| 36242 hsa-mir-191 | AC007009.1  | 0.33054952 mirna_lnc  |
| 36243 hsa-mir-191 | AJ239322.1  | 0.310592882 mirna_lnc |
| 36244 hsa-mir-191 | AL121832.3  | 0.524516661 mirna_lnc |
| 36245 hsa-mir-191 | AC137630.1  | 0.387227136 mirna_lnc |
| 36246 hsa-mir-191 | AC233992.3  | 0.313465094 mirna_lnc |
| 36247 hsa-mir-191 | EIF3J-DT    | 0.32366196 mirna_lnc  |
| 36248 hsa-mir-191 | AL391152.1  | 0.359733527 mirna_lnc |
| 36249 hsa-mir-191 | AC026992.2  | 0.336202374 mirna_lnc |
| 36250 hsa-mir-191 | AC131011.1  | 0.333383522 mirna_lnc |
| 36251 hsa-mir-191 | AL358473.1  | 0.315920095 mirna_lnc |
| 36252 hsa-mir-191 | AC006486.2  | 0.349073844 mirna_lnc |
| 36253 hsa-mir-191 | ABALON      | 0.42597898 mirna_lnc  |
| 36254 hsa-mir-191 | AC131097.3  | 0.385190637 mirna_lnc |
| 36255 hsa-mir-191 | AC096887.2  | 0.466220611 mirna_lnc |
| 36256 hsa-mir-191 | AC093227.1  | 0.356384499 mirna_lnc |
| 36257 hsa-mir-191 | AC080080.1  | 0.348144318 mirna_lnc |
| 36258 hsa-mir-191 | AC087273.2  | 0.344303421 mirna_lnc |
| 36259 hsa-mir-191 | TRPM2-AS    | 0.460509594 mirna_lnc |
| 36260 hsa-mir-191 | AL592114.3  | 0.309355732 mirna_lnc |
| 36261 hsa-mir-191 | AC012150.1  | 0.34394056 mirna_lnc  |
| 36262 hsa-mir-191 | AC130456.4  | 0.33142127 mirna_lnc  |
| 36263 hsa-mir-191 | WASIR2      | 0.344735024 mirna_lnc |
| 36264 hsa-mir-191 | AC007996.1  | 0.316550333 mirna_lnc |
| 36265 hsa-mir-191 | AC067863.2  | 0.352043489 mirna_lnc |
| 36266 hsa-mir-191 | AC016708.1  | 0.318184172 mirna_lnc |
| 36267 hsa-mir-191 | LINC01342   | 0.411059583 mirna_lnc |
| 36268 hsa-mir-191 | AL358472.3  | 0.321570999 mirna_lnc |
| 36269 hsa-mir-191 | AC067930.4  | 0.336660278 mirna_lnc |
| 36270 hsa-mir-191 | AL117382.1  | 0.358771197 mirna_lnc |
| 36271 hsa-mir-191 | AC099786.1  | 0.318499443 mirna_lnc |
| 36272 hsa-mir-191 | AL121721.1  | 0.424548993 mirna_lnc |
| 36273 hsa-mir-191 | AL390961.3  | 0.382027053 mirna_lnc |
| 36274 hsa-mir-191 | ZBTB46-AS1  | 0.331151236 mirna_lnc |
| 36275 hsa-mir-191 | AC011773.4  | 0.337457673 mirna_lnc |
| 36276 hsa-mir-191 | AC084781.1  | 0.341902874 mirna_lnc |
| 36277 hsa-mir-191 | AC092171.4  | 0.314937914 mirna_lnc |
| 36278 hsa-mir-191 | AC090527.3  | 0.444583258 mirna_lnc |
| 36279 hsa-mir-191 | AC112512.1  | 0.330259291 mirna_lnc |
| 36280 hsa-mir-191 | AP003680.1  | 0.320170302 mirna_lnc |
| 36281 hsa-mir-191 | AC007128.1  | 0.367875112 mirna_lnc |
| 36282 hsa-mir-191 | LINC00628   | 0.314233164 mirna_lnc |
| 36283 hsa-mir-191 | RNASEH1-AS1 | 0.376009515 mirna_lnc |
| 36284 hsa-mir-191 | AL662795.2  | 0.309758544 mirna_lnc |
| 36285 hsa-mir-191 | AL390961.2  | 0.301369849 mirna_lnc |
| 36286 hsa-mir-191 | AL080317.2  | 0.31860463 mirna_lnc  |
| 36287 hsa-mir-191 | AC010719.1  | 0.337347799 mirna_lnc |

|                   |             |                       |
|-------------------|-------------|-----------------------|
| 36288 hsa-mir-191 | LINC01833   | 0.355162477 mirna_lnc |
| 36289 hsa-mir-191 | TRPC7-AS1   | 0.315750726 mirna_lnc |
| 36290 hsa-mir-191 | CAPN10-DT   | 0.318243479 mirna_lnc |
| 36291 hsa-mir-191 | LINC01978   | 0.318221221 mirna_lnc |
| 36292 hsa-mir-191 | AL139082.1  | 0.300630127 mirna_lnc |
| 36293 hsa-mir-191 | STPG3-AS1   | 0.419278631 mirna_lnc |
| 36294 hsa-mir-191 | AP001065.2  | 0.473523236 mirna_lnc |
| 36295 hsa-mir-191 | AC011773.1  | 0.343335283 mirna_lnc |
| 36296 hsa-mir-191 | AL024508.2  | 0.328945709 mirna_lnc |
| 36297 hsa-mir-191 | AC131097.1  | 0.366966021 mirna_lnc |
| 36298 hsa-mir-191 | LINC01101   | 0.314213858 mirna_lnc |
| 36299 hsa-mir-191 | AL451064.1  | 0.337528272 mirna_lnc |
| 36300 hsa-mir-191 | AC083900.1  | 0.406756254 mirna_lnc |
| 36301 hsa-mir-191 | AC010326.3  | 0.354943056 mirna_lnc |
| 36302 hsa-mir-191 | AL161421.1  | 0.314195691 mirna_lnc |
| 36303 hsa-mir-191 | CNNM3-DT    | 0.380643854 mirna_lnc |
| 36304 hsa-mir-191 | AC145207.5  | 0.37389968 mirna_lnc  |
| 36305 hsa-mir-191 | AP003733.4  | 0.42487274 mirna_lnc  |
| 36306 hsa-mir-191 | LINC02177   | 0.389587603 mirna_lnc |
| 36307 hsa-mir-191 | LINC00884   | 0.379664388 mirna_lnc |
| 36308 hsa-mir-191 | LINC02535   | 0.387359574 mirna_lnc |
| 36309 hsa-mir-191 | STAM-AS1    | 0.321000029 mirna_lnc |
| 36310 hsa-mir-191 | SAPCD1-AS1  | 0.311927909 mirna_lnc |
| 36311 hsa-mir-191 | AC007773.1  | 0.340855527 mirna_lnc |
| 36312 hsa-mir-191 | AL590133.1  | 0.353004427 mirna_lnc |
| 36313 hsa-mir-191 | AC018809.1  | 0.328659065 mirna_lnc |
| 36314 hsa-mir-191 | TSPEAR-AS2  | 0.341479798 mirna_lnc |
| 36315 hsa-mir-191 | AC073111.1  | 0.310217125 mirna_lnc |
| 36316 hsa-mir-191 | AL606489.1  | 0.345654694 mirna_lnc |
| 36317 hsa-mir-191 | AL137058.3  | 0.395978363 mirna_lnc |
| 36318 hsa-mir-191 | MAP3K2-DT   | 0.322838315 mirna_lnc |
| 36319 hsa-mir-191 | LINC02204   | 0.383571337 mirna_lnc |
| 36320 hsa-mir-191 | AL133215.1  | 0.367968205 mirna_lnc |
| 36321 hsa-mir-191 | AC124067.4  | 0.485241663 mirna_lnc |
| 36322 hsa-mir-191 | AL022324.3  | 0.342113606 mirna_lnc |
| 36323 hsa-mir-191 | RNF157-AS1  | 0.341636311 mirna_lnc |
| 36324 hsa-mir-191 | U73166.1    | 0.421138686 mirna_lnc |
| 36325 hsa-mir-191 | ZNF385D-AS1 | 0.350561644 mirna_lnc |
| 36326 hsa-mir-191 | AL357140.2  | 0.310431377 mirna_lnc |
| 36327 hsa-mir-191 | AC021016.3  | 0.329569382 mirna_lnc |
| 36328 hsa-mir-191 | KBTBD11-OT1 | 0.323311088 mirna_lnc |
| 36329 hsa-mir-191 | AC022762.2  | 0.337587887 mirna_lnc |
| 36330 hsa-mir-191 | AL031665.1  | 0.330074679 mirna_lnc |
| 36331 hsa-mir-191 | AL359697.1  | 0.423375196 mirna_lnc |
| 36332 hsa-mir-191 | AC127024.2  | 0.305908471 mirna_lnc |
| 36333 hsa-mir-191 | AC104072.1  | 0.322523469 mirna_lnc |
| 36334 hsa-mir-191 | AL512283.1  | 0.309320901 mirna_lnc |
| 36335 hsa-mir-191 | AC119403.1  | 0.361347729 mirna_lnc |
| 36336 hsa-mir-191 | AP006621.5  | 0.401625489 mirna_lnc |
| 36337 hsa-mir-191 | LINC01756   | 0.344935131 mirna_lnc |
| 36338 hsa-mir-191 | C10orf111   | 0.353820428 mirna_lnc |
| 36339 hsa-mir-191 | AC145207.9  | 0.34877474 mirna_lnc  |
| 36340 hsa-mir-191 | AC243964.2  | 0.328107798 mirna_lnc |
| 36341 hsa-mir-191 | AC105935.1  | 0.354852948 mirna_lnc |

|                   |              |                       |
|-------------------|--------------|-----------------------|
| 36342 hsa-mir-191 | SLC25A25-AS1 | 0.381155523 mirna_lnc |
| 36343 hsa-mir-191 | AL391832.1   | 0.322002957 mirna_lnc |
| 36344 hsa-mir-191 | LBX2-AS1     | 0.370216337 mirna_lnc |
| 36345 hsa-mir-191 | AC009065.5   | 0.323759286 mirna_lnc |
| 36346 hsa-mir-191 | AC007638.2   | 0.367610716 mirna_lnc |
| 36347 hsa-mir-191 | AC243964.3   | 0.32605405 mirna_lnc  |
| 36348 hsa-mir-191 | KRTAP5-AS1   | 0.311408322 mirna_lnc |
| 36349 hsa-mir-191 | AC010327.4   | 0.454615295 mirna_lnc |
| 36350 hsa-mir-191 | AC011700.1   | 0.411384405 mirna_lnc |
| 36351 hsa-mir-191 | AC244100.3   | 0.439527358 mirna_lnc |
| 36352 hsa-mir-191 | AL606970.1   | 0.359070018 mirna_lnc |
| 36353 hsa-mir-191 | AC012645.1   | 0.385261015 mirna_lnc |
| 36354 hsa-mir-191 | AC017074.1   | 0.340736542 mirna_lnc |
| 36355 hsa-mir-191 | AL606537.1   | 0.326693262 mirna_lnc |
| 36356 hsa-mir-191 | AC092447.5   | 0.422869087 mirna_lnc |
| 36357 hsa-mir-191 | CATIP-AS2    | 0.440720006 mirna_lnc |
| 36358 hsa-mir-191 | AL136962.1   | 0.435010502 mirna_lnc |
| 36359 hsa-mir-191 | AL591895.1   | 0.32932325 mirna_lnc  |
| 36360 hsa-mir-191 | AC083806.3   | 0.310602092 mirna_lnc |
| 36361 hsa-mir-191 | AC116036.2   | 0.360047945 mirna_lnc |
| 36362 hsa-mir-191 | FBXL19-AS1   | 0.363762484 mirna_lnc |
| 36363 hsa-mir-191 | AC116025.2   | 0.513091568 mirna_lnc |
| 36364 hsa-mir-191 | AC104534.1   | 0.351333672 mirna_lnc |
| 36365 hsa-mir-191 | AC005089.1   | 0.305646928 mirna_lnc |
| 36366 hsa-mir-191 | ERVK9-11     | 0.366109064 mirna_lnc |
| 36367 hsa-mir-191 | AL133215.2   | 0.325573423 mirna_lnc |
| 36368 hsa-mir-191 | AC022150.2   | 0.301620175 mirna_lnc |
| 36369 hsa-mir-191 | TDRKH-AS1    | 0.333074873 mirna_lnc |
| 36370 hsa-mir-191 | AC097639.1   | 0.479507113 mirna_lnc |
| 36371 hsa-mir-191 | AL121574.1   | 0.325167588 mirna_lnc |
| 36372 hsa-mir-191 | AC024361.1   | 0.329622939 mirna_lnc |
| 36373 hsa-mir-191 | AC008555.7   | 0.341862873 mirna_lnc |
| 36374 hsa-mir-191 | AC004233.1   | 0.358785849 mirna_lnc |
| 36375 hsa-mir-191 | AL590438.1   | 0.333051465 mirna_lnc |
| 36376 hsa-mir-191 | AC000036.1   | 0.33699739 mirna_lnc  |
| 36377 hsa-mir-191 | FGF12-AS3    | 0.331868706 mirna_lnc |
| 36378 hsa-mir-191 | AC092119.2   | 0.304514984 mirna_lnc |
| 36379 hsa-mir-191 | HCG15        | 0.366799333 mirna_lnc |
| 36380 hsa-mir-191 | AC005280.1   | 0.395513875 mirna_lnc |
| 36381 hsa-mir-191 | AL607028.1   | 0.364154416 mirna_lnc |
| 36382 hsa-mir-191 | AL359183.1   | 0.321839554 mirna_lnc |
| 36383 hsa-mir-191 | AC091806.1   | 0.349284923 mirna_lnc |
| 36384 hsa-mir-191 | AC107068.1   | 0.336344064 mirna_lnc |
| 36385 hsa-mir-191 | AFDN-DT      | 0.321283175 mirna_lnc |
| 36386 hsa-mir-191 | AC104447.1   | 0.398835967 mirna_lnc |
| 36387 hsa-mir-191 | LINC02365    | 0.459543576 mirna_lnc |
| 36388 hsa-mir-191 | LINC01979    | 0.472565438 mirna_lnc |
| 36389 hsa-mir-191 | AC132219.2   | 0.333311308 mirna_lnc |
| 36390 hsa-mir-191 | AL139286.2   | 0.330200372 mirna_lnc |
| 36391 hsa-mir-191 | LINC02253    | 0.350674955 mirna_lnc |
| 36392 hsa-mir-191 | MAGEA8-AS1   | 0.305066822 mirna_lnc |
| 36393 hsa-mir-191 | AL591178.1   | 0.31089653 mirna_lnc  |
| 36394 hsa-mir-191 | LINC01843    | 0.340417947 mirna_lnc |
| 36395 hsa-mir-191 | AC125616.1   | 0.363501342 mirna_lnc |

|                   |             |                       |
|-------------------|-------------|-----------------------|
| 36396 hsa-mir-191 | AC087392.3  | 0.319912255 mirna_lnc |
| 36397 hsa-mir-191 | AC078909.2  | 0.351149913 mirna_lnc |
| 36398 hsa-mir-191 | AP001273.1  | 0.319592241 mirna_lnc |
| 36399 hsa-mir-191 | AL118511.1  | 0.331129152 mirna_lnc |
| 36400 hsa-mir-191 | AC004925.1  | 0.322227454 mirna_lnc |
| 36401 hsa-mir-191 | Z99129.3    | 0.312015091 mirna_lnc |
| 36402 hsa-mir-191 | AC073389.3  | 0.315779795 mirna_lnc |
| 36403 hsa-mir-191 | AC005336.3  | 0.310362031 mirna_lnc |
| 36404 hsa-mir-191 | AL158166.2  | 0.3277388 mirna_lnc   |
| 36405 hsa-mir-191 | MAPT-IT1    | 0.323976146 mirna_lnc |
| 36406 hsa-mir-191 | AL360181.1  | 0.377036505 mirna_lnc |
| 36407 hsa-mir-191 | AL133351.1  | 0.311469054 mirna_lnc |
| 36408 hsa-mir-191 | AC141002.1  | 0.364975601 mirna_lnc |
| 36409 hsa-mir-191 | CEBPA-DT    | 0.442670046 mirna_lnc |
| 36410 hsa-mir-191 | ZNF252P-AS1 | 0.409762156 mirna_lnc |
| 36411 hsa-mir-191 | AC244100.2  | 0.439876943 mirna_lnc |
| 36412 hsa-mir-191 | AC005037.1  | 0.338381634 mirna_lnc |
| 36413 hsa-mir-191 | AC010643.1  | 0.329164957 mirna_lnc |
| 36414 hsa-mir-191 | AC017100.1  | 0.391271287 mirna_lnc |
| 36415 hsa-mir-191 | LINC00471   | 0.303355673 mirna_lnc |
| 36416 hsa-mir-191 | SPANXA2-OT1 | 0.325989273 mirna_lnc |
| 36417 hsa-mir-191 | AP000346.1  | 0.329969538 mirna_lnc |
| 36418 hsa-mir-191 | AC005006.1  | 0.357513292 mirna_lnc |
| 36419 hsa-mir-191 | AL451064.2  | 0.335159408 mirna_lnc |
| 36420 hsa-mir-191 | AC007255.1  | 0.346585816 mirna_lnc |
| 36421 hsa-mir-191 | AL353726.2  | 0.329973374 mirna_lnc |
| 36422 hsa-mir-191 | SPACA6P-AS  | 0.354818843 mirna_lnc |
| 36423 hsa-mir-191 | AC104590.1  | 0.301826705 mirna_lnc |
| 36424 hsa-mir-191 | LINC00543   | 0.457046644 mirna_lnc |
| 36425 hsa-mir-191 | LINC00574   | 0.383084289 mirna_lnc |
| 36426 hsa-mir-191 | LINC02652   | 0.320664006 mirna_lnc |
| 36427 hsa-mir-191 | AC073957.3  | 0.368876194 mirna_lnc |
| 36428 hsa-mir-191 | AL161725.2  | 0.42450063 mirna_lnc  |
| 36429 hsa-mir-191 | AL031673.1  | 0.370777977 mirna_lnc |
| 36430 hsa-mir-191 | LINC02575   | 0.598967954 mirna_lnc |
| 36431 hsa-mir-191 | AC061975.7  | 0.327225594 mirna_lnc |
| 36432 hsa-mir-191 | L29074.1    | 0.39227004 mirna_lnc  |
| 36433 hsa-mir-191 | AC121338.2  | 0.312451452 mirna_lnc |
| 36434 hsa-mir-191 | AC005391.1  | 0.3844032 mirna_lnc   |
| 36435 hsa-mir-191 | AC002401.3  | 0.317024024 mirna_lnc |
| 36436 hsa-mir-191 | AC023024.2  | 0.32295811 mirna_lnc  |
| 36437 hsa-mir-191 | AL390719.2  | 0.353132276 mirna_lnc |
| 36438 hsa-mir-191 | AC004593.1  | 0.359464244 mirna_lnc |
| 36439 hsa-mir-191 | CRTC3-AS1   | 0.380963762 mirna_lnc |
| 36440 hsa-mir-191 | LINC02313   | 0.313275531 mirna_lnc |
| 36441 hsa-mir-191 | LINC00857   | 0.397279354 mirna_lnc |
| 36442 hsa-mir-191 | AL589765.6  | 0.327017577 mirna_lnc |
| 36443 hsa-mir-191 | AL157931.1  | 0.323436314 mirna_lnc |
| 36444 hsa-mir-191 | TSPEAR-AS1  | 0.428924486 mirna_lnc |
| 36445 hsa-mir-191 | AC124045.1  | 0.323835983 mirna_lnc |
| 36446 hsa-mir-191 | LINC00449   | 0.326106145 mirna_lnc |
| 36447 hsa-mir-191 | AL354919.1  | 0.336145615 mirna_lnc |
| 36448 hsa-mir-191 | AL158211.4  | 0.3212918 mirna_lnc   |
| 36449 hsa-mir-191 | AC061975.6  | 0.389630305 mirna_lnc |

|                   |             |                        |
|-------------------|-------------|------------------------|
| 36450 hsa-mir-191 | AL662791. 1 | 0. 388602192 mirna_lnc |
| 36451 hsa-mir-191 | AC016292. 1 | 0. 302753066 mirna_lnc |
| 36452 hsa-mir-191 | AP001628. 1 | 0. 311484155 mirna_lnc |
| 36453 hsa-mir-191 | LINC01106   | 0. 406275853 mirna_lnc |
| 36454 hsa-mir-191 | KCNIP2-AS1  | 0. 335315256 mirna_lnc |
| 36455 hsa-mir-191 | AC023024. 1 | 0. 363637661 mirna_lnc |
| 36456 hsa-mir-191 | AC026462. 3 | 0. 331080621 mirna_lnc |
| 36457 hsa-mir-191 | AC127526. 1 | 0. 311905391 mirna_lnc |
| 36458 hsa-mir-191 | AL121832. 1 | 0. 353535452 mirna_lnc |
| 36459 hsa-mir-191 | LINC02453   | 0. 315637928 mirna_lnc |
| 36460 hsa-mir-191 | AC012467. 2 | 0. 434046506 mirna_lnc |
| 36461 hsa-mir-191 | AP001476. 1 | 0. 372444746 mirna_lnc |
| 36462 hsa-mir-191 | AC011773. 3 | 0. 304230078 mirna_lnc |
| 36463 hsa-mir-191 | AL080317. 1 | 0. 382097577 mirna_lnc |
| 36464 hsa-mir-191 | AP001626. 1 | 0. 326008579 mirna_lnc |
| 36465 hsa-mir-191 | AL359878. 1 | 0. 336226548 mirna_lnc |
| 36466 hsa-mir-191 | AC021092. 1 | 0. 394608781 mirna_lnc |
| 36467 hsa-mir-191 | BSN-DT      | 0. 351930406 mirna_lnc |
| 36468 hsa-mir-191 | AC128687. 2 | 0. 306588645 mirna_lnc |
| 36469 hsa-mir-191 | AC107982. 3 | 0. 319258084 mirna_lnc |
| 36470 hsa-mir-191 | AC137767. 1 | 0. 365396595 mirna_lnc |
| 36471 hsa-mir-191 | AC114488. 1 | 0. 339689595 mirna_lnc |
| 36472 hsa-mir-191 | AC099684. 2 | 0. 384733495 mirna_lnc |
| 36473 hsa-mir-330 | AC004241. 3 | 0. 360354074 mirna_lnc |
| 36474 hsa-mir-330 | AL133338. 1 | 0. 30957852 mirna_lnc  |
| 36475 hsa-mir-330 | JARID2-AS1  | 0. 33536012 mirna_lnc  |
| 36476 hsa-mir-330 | AC131009. 3 | 0. 346486255 mirna_lnc |
| 36477 hsa-mir-330 | AL109811. 2 | 0. 313366988 mirna_lnc |
| 36478 hsa-mir-330 | AC079907. 1 | 0. 300834826 mirna_lnc |
| 36479 hsa-mir-330 | AC023157. 3 | 0. 336483757 mirna_lnc |
| 36480 hsa-mir-330 | FER1L6-AS2  | 0. 344637326 mirna_lnc |
| 36481 hsa-mir-330 | HOXC-AS3    | 0. 319509055 mirna_lnc |
| 36482 hsa-mir-330 | GK-IT1      | 0. 32982618 mirna_lnc  |
| 36483 hsa-mir-330 | LINC01424   | 0. 325038423 mirna_lnc |
| 36484 hsa-mir-330 | AL163051. 1 | 0. 337011814 mirna_lnc |
| 36485 hsa-mir-330 | AC138305. 3 | 0. 333505461 mirna_lnc |
| 36486 hsa-mir-330 | LINC01357   | 0. 382921548 mirna_lnc |
| 36487 hsa-mir-330 | TRPM2-AS    | 0. 321677059 mirna_lnc |
| 36488 hsa-mir-330 | LINC02607   | 0. 314668023 mirna_lnc |
| 36489 hsa-mir-330 | AC023302. 1 | 0. 329917728 mirna_lnc |
| 36490 hsa-mir-330 | AC004943. 3 | 0. 358893217 mirna_lnc |
| 36491 hsa-mir-330 | AC117382. 2 | 0. 307810456 mirna_lnc |
| 36492 hsa-mir-330 | AC011290. 1 | 0. 334264513 mirna_lnc |
| 36493 hsa-mir-330 | AL035045. 1 | 0. 39462317 mirna_lnc  |
| 36494 hsa-mir-330 | AC105235. 1 | 0. 367131549 mirna_lnc |
| 36495 hsa-mir-330 | AL133243. 3 | 0. 310928667 mirna_lnc |
| 36496 hsa-mir-330 | AL139287. 1 | 0. 346640648 mirna_lnc |
| 36497 hsa-mir-330 | AC113143. 1 | 0. 396347471 mirna_lnc |
| 36498 hsa-mir-330 | BTBD9-AS1   | 0. 309004195 mirna_lnc |
| 36499 hsa-mir-330 | AC073896. 4 | 0. 31183854 mirna_lnc  |
| 36500 hsa-mir-330 | AC108865. 1 | 0. 309121787 mirna_lnc |
| 36501 hsa-mir-330 | AC011446. 1 | 0. 360352044 mirna_lnc |
| 36502 hsa-mir-330 | AL357140. 2 | 0. 347939345 mirna_lnc |
| 36503 hsa-mir-330 | AC008736. 2 | 0. 354450628 mirna_lnc |



|                   |             |                        |
|-------------------|-------------|------------------------|
| 36504 hsa-mir-330 | AP003086. 2 | 0. 333372119 mirna_lnc |
| 36505 hsa-mir-330 | AC093677. 2 | 0. 315091806 mirna_lnc |
| 36506 hsa-mir-330 | RC3H1-IT1   | 0. 304954925 mirna_lnc |
| 36507 hsa-mir-330 | AC011676. 1 | 0. 374006057 mirna_lnc |
| 36508 hsa-mir-330 | AC019226. 2 | 0. 316355121 mirna_lnc |
| 36509 hsa-mir-330 | BACH1-IT1   | 0. 329749906 mirna_lnc |
| 36510 hsa-mir-330 | AC108865. 2 | 0. 340473354 mirna_lnc |
| 36511 hsa-mir-330 | AC010834. 2 | 0. 309128102 mirna_lnc |
| 36512 hsa-mir-330 | AC124798. 1 | 0. 317449657 mirna_lnc |
| 36513 hsa-mir-330 | AC090907. 1 | 0. 304636445 mirna_lnc |
| 36514 hsa-mir-330 | AL590822. 1 | 0. 350137989 mirna_lnc |
| 36515 hsa-mir-330 | AC027319. 1 | 0. 31299919 mirna_lnc  |
| 36516 hsa-mir-330 | AL121992. 3 | 0. 37537155 mirna_lnc  |
| 36517 hsa-mir-330 | BACH1-IT2   | 0. 31016703 mirna_lnc  |
| 36518 hsa-mir-330 | AC004263. 1 | 0. 312838272 mirna_lnc |
| 36519 hsa-mir-330 | AL356488. 3 | 0. 369813349 mirna_lnc |
| 36520 hsa-mir-330 | AC012370. 1 | 0. 336967712 mirna_lnc |
| 36521 hsa-mir-330 | AP000240. 1 | 0. 394643051 mirna_lnc |
| 36522 hsa-mir-330 | AC069307. 1 | 0. 309624253 mirna_lnc |
| 36523 hsa-mir-330 | AP003392. 3 | 0. 380360335 mirna_lnc |
| 36524 hsa-mir-330 | AL109811. 1 | 0. 333669991 mirna_lnc |
| 36525 hsa-mir-330 | AL731537. 1 | 0. 34087971 mirna_lnc  |
| 36526 hsa-mir-330 | AL121944. 1 | 0. 336757291 mirna_lnc |
| 36527 hsa-mir-330 | AC002059. 1 | 0. 354218918 mirna_lnc |
| 36528 hsa-mir-330 | AC009163. 5 | 0. 36147232 mirna_lnc  |
| 36529 hsa-mir-330 | CYP51A1-AS1 | 0. 301761623 mirna_lnc |
| 36530 hsa-mir-330 | BACH1-AS1   | 0. 302287363 mirna_lnc |
| 36531 hsa-mir-330 | AC002044. 1 | 0. 368516333 mirna_lnc |
| 36532 hsa-mir-330 | AL513477. 2 | 0. 301114096 mirna_lnc |
| 36533 hsa-mir-330 | AP001610. 2 | 0. 305875264 mirna_lnc |
| 36534 hsa-mir-424 | DEPDC1-AS1  | 0. 343013488 mirna_lnc |
| 36535 hsa-mir-424 | AL391069. 2 | 0. 326041453 mirna_lnc |
| 36536 hsa-mir-424 | AC012640. 2 | 0. 334615559 mirna_lnc |
| 36537 hsa-mir-424 | AC024230. 1 | 0. 349255269 mirna_lnc |
| 36538 hsa-mir-424 | AC012640. 1 | 0. 329056509 mirna_lnc |
| 36539 hsa-mir-424 | AL591846. 2 | 0. 308677473 mirna_lnc |
| 36540 hsa-mir-424 | AC125437. 1 | 0. 311997188 mirna_lnc |
| 36541 hsa-mir-424 | AC132192. 2 | 0. 300074981 mirna_lnc |
| 36542 hsa-mir-424 | AC118755. 1 | 0. 317882718 mirna_lnc |
| 36543 hsa-mir-424 | AC100812. 1 | 0. 315256791 mirna_lnc |
| 36544 hsa-mir-424 | AC011297. 1 | 0. 314086756 mirna_lnc |
| 36545 hsa-mir-424 | AL354892. 2 | 0. 31074389 mirna_lnc  |
| 36546 hsa-mir-424 | AC016205. 1 | 0. 329387887 mirna_lnc |
| 36547 hsa-mir-424 | AC124276. 1 | 0. 300022257 mirna_lnc |
| 36548 hsa-mir-424 | AC008115. 1 | 0. 359370697 mirna_lnc |
| 36549 hsa-mir-424 | AC009271. 1 | 0. 377320886 mirna_lnc |
| 36550 hsa-mir-424 | AC098818. 2 | 0. 328713174 mirna_lnc |
| 36551 hsa-mir-424 | AC007391. 1 | 0. 310139326 mirna_lnc |
| 36552 hsa-mir-424 | AP001160. 2 | 0. 316562505 mirna_lnc |
| 36553 hsa-mir-424 | AC007250. 1 | 0. 312958049 mirna_lnc |
| 36554 hsa-mir-424 | PITPNA-AS1  | 0. 318492228 mirna_lnc |
| 36555 hsa-mir-424 | AC025678. 3 | 0. 318394265 mirna_lnc |
| 36556 hsa-mir-424 | AC135178. 5 | 0. 305361317 mirna_lnc |
| 36557 hsa-mir-424 | AL353726. 2 | 0. 30427206 mirna_lnc  |

|       |             |            |             |           |
|-------|-------------|------------|-------------|-----------|
| 36558 | hsa-mir-424 | LINC00311  | 0.302089043 | mirna_lnc |
| 36559 | hsa-mir-424 | AC145423.2 | 0.308258996 | mirna_lnc |
| 36560 | hsa-mir-424 | AC016229.2 | 0.328728249 | mirna_lnc |
| 36561 | hsa-mir-424 | AC015917.2 | 0.308222235 | mirna_lnc |
