# Supplementary material for: Novel lncRNA Panel as for Prognosis in Esophageal Squamous Cell Carcinoma Based on ceRNA Network Mechanism
Source: Hindawi journal article supplement (doi:10.1155/2021/8020879), 2021-09-24
Supplement: f1 [file 8020879.f1.zip]

| Hybridization<br>REF | Composite<br>Element | years | vital<br>– | days_to<br>death | days_to<br>last_followup | stage | T_stage | N_stage | M_stage | gender | date_of_initial_pathologic_diagnosis | radiation_therapy | karnofsky_performance_score | histological_type                       |
|----------------------|----------------------|-------|------------|------------------|--------------------------|-------|---------|---------|---------|--------|--------------------------------------|-------------------|-----------------------------|-----------------------------------------|
| tcga-ic-a6rf         | value                | 69    | 0          | NA               | 477                      | ia    | t1      | n0      | m0      | female | 2013                                 | no                | NA                          | esophagus<br>squamous cell<br>carcinoma |
| tcga-jy-a6fb         | value                | 77    | 0          | NA               | 1837                     | i     | t1      | n0      | m0      | male   | 2007                                 | no                | NA                          | esophagus<br>adenocarcinoma,<br>nos     |
| tcga-jy-a938         | value                | 75    | 0          | NA               | 1060                     | iib   | t3      | n0      | m0      | male   | 2012                                 | no                | NA                          | esophagus<br>adenocarcinoma,<br>nos     |
| tcga-l5-a43i         | value                | 77    | 1          | 556              | NA                       | iiia  | t3      | n1      | mx      | male   | 2011                                 | yes               | NA                          | esophagus<br>adenocarcinoma,<br>nos     |
| tcga-l5-a43j         | value                | 90    | 1          | 131              | NA                       | iib   | t3      | n0      | mx      | male   | 2011                                 | NA                | NA                          | esophagus<br>squamous cell<br>carcinoma |
| tcga-l5-a43m         | value                | 84    | 0          | NA               | 272                      | NA    | t3      | n2      | mx      | female | 2009                                 | no                | NA                          | esophagus<br>adenocarcinoma,<br>nos     |
| tcga-l5-a4oe         | value                | 81    | 1          | 730              | NA                       | iiib  | t3      | n2      | NA      | male   | 2011                                 | no                | NA                          | esophagus<br>adenocarcinoma,<br>nos     |

|              |       |    |   |     |      |      |    |    |    |        |      |     |    |                                   |
|--------------|-------|----|---|-----|------|------|----|----|----|--------|------|-----|----|-----------------------------------|
| tcga-l5-a4og | value | 79 | 0 | NA  | 143  | i    | t1 | n0 | m0 | female | 2012 | no  | NA | esophagus adenocarcinoma, nos     |
| tcga-l5-a4oi | value | 79 | 0 | NA  | 608  | iiic | t3 | n3 | mx | male   | 2012 | no  | NA | esophagus adenocarcinoma, nos     |
| tcga-l5-a88t | value | 86 | 0 | NA  | 694  | iib  | t2 | n1 | m0 | male   | 2012 | no  | NA | esophagus adenocarcinoma, nos     |
| tcga-l5-a88y | value | 76 | 0 | NA  | 11   | NA   | t1 | n0 | mx | male   | 2006 | NA  | NA | esophagus adenocarcinoma, nos     |
| tcga-l5-a8ng | value | 77 | 0 | NA  | 1094 | iii  | t3 | n1 | m0 | male   | 2001 | no  | NA | esophagus adenocarcinoma, nos     |
| tcga-l5-a8nt | value | 69 | 0 | NA  | 825  | iib  | t3 | n0 | m0 | male   | 2001 | yes | NA | esophagus adenocarcinoma, nos     |
| tcga-q9-a6fu | value | 57 | 1 | 157 | NA   | iiib | t3 | n2 | m0 | female | 2012 | no  | NA | esophagus squamous cell carcinoma |
| tcga-s8-a6bv | value | 76 | 0 | NA  | 609  | iiia | t3 | n1 | mx | male   | 2012 | no  | NA | esophagus adenocarcinoma, nos     |
| tcga-2h-a9gf | value | 67 | 1 | 784 | NA   | iii  | t3 | n1 | m0 | male   | 2001 | no  | NA | esophagus adenocarcinoma, nos     |

|              |       |    |   |     |    |     |    |    |     |      |      |    |    |                               |
|--------------|-------|----|---|-----|----|-----|----|----|-----|------|------|----|----|-------------------------------|
| tcga-2h-a9gg | value | 66 | 1 | 610 | NA | iii | t3 | n1 | m0  | male | 1999 | no | NA | esophagus adenocarcinoma, nos |
| tcga-2h-a9gh | value | 44 | 1 | 951 | NA | iib | t1 | n1 | m0  | male | 1998 | no | NA | esophagus adenocarcinoma, nos |
| tcga-2h-a9gi | value | 68 | 1 | 435 | NA | iii | t3 | n1 | m0  | male | 1999 | no | NA | esophagus adenocarcinoma, nos |
| tcga-2h-a9gj | value | 57 | 1 | ### | NA | i   | t1 | n0 | m0  | male | 2000 | no | NA | esophagus adenocarcinoma, nos |
| tcga-2h-a9gk | value | 43 | 1 | 232 | NA | iii | t3 | n1 | m0  | male | 2000 | no | NA | esophagus adenocarcinoma, nos |
| tcga-2h-a9gl | value | 74 | 1 | 180 | NA | iii | t3 | n1 | m0  | male | 2000 | no | NA | esophagus adenocarcinoma, nos |
| tcga-2h-a9gm | value | 53 | 1 | 424 | NA | iib | t1 | n1 | m0  | male | 2000 | no | NA | esophagus adenocarcinoma, nos |
| tcga-2h-a9gn | value | 70 | 1 | 272 | NA | iii | t3 | n1 | m0  | male | 2000 | no | NA | esophagus adenocarcinoma, nos |
| tcga-2h-a9go | value | 58 | 1 | 494 | NA | iva | t3 | n1 | m1a | male | 2000 | no | NA | esophagus adenocarcinoma, nos |

|              |       |    |   |     |      |      |    |    |    |        |      |     |    |                                   |
|--------------|-------|----|---|-----|------|------|----|----|----|--------|------|-----|----|-----------------------------------|
| tcga-2h-a9gq | value | 80 | 1 | 128 | NA   | iii  | t3 | n1 | m0 | male   | 2001 | no  | NA | esophagus adenocarcinoma, nos     |
| tcga-2h-a9gr | value | 80 | 1 | 987 | NA   | iiia | t3 | n0 | m0 | male   | 1999 | no  | NA | esophagus adenocarcinoma, nos     |
| tcga-ic-a6re | value | 59 | 0 | NA  | 234  | iib  | t1 | n1 | m0 | male   | 2013 | no  | NA | esophagus adenocarcinoma, nos     |
| tcga-ig-a3i8 | value | 51 | 0 | NA  | 1012 | iiia | t3 | n0 | m0 | female | 2011 | no  | 80 | esophagus squamous cell carcinoma |
| tcga-ig-a3ql | value | 54 | 0 | NA  | 1071 | iiia | t2 | n0 | m0 | male   | 2011 | no  | 80 | esophagus squamous cell carcinoma |
| tcga-ig-a3y9 | value | 72 | 1 | 26  | NA   | iiia | t4 | n0 | m0 | male   | 2012 | no  | 80 | esophagus squamous cell carcinoma |
| tcga-ig-a3ya | value | 53 | 0 | NA  | 632  | iiia | t4 | n0 | m0 | male   | 2012 | no  | 80 | esophagus squamous cell carcinoma |
| tcga-ig-a3yb | value | 61 | 0 | NA  | 80   | iiia | t3 | n1 | m0 | male   | 2012 | yes | 80 | esophagus squamous cell carcinoma |
| tcga-ig-a3yc | value | 62 | 0 | NA  | 612  | iiia | t3 | n1 | m0 | male   | 2012 | no  | 80 | esophagus squamous cell carcinoma |

|              |       |    |   |     |     |      |    |    |    |        |      |     |    |                                   |
|--------------|-------|----|---|-----|-----|------|----|----|----|--------|------|-----|----|-----------------------------------|
| tcga-ig-a4p3 | value | 48 | 1 | 567 | NA  | iib  | t2 | n1 | m0 | male   | 2012 | yes | NA | esophagus squamous cell carcinoma |
| tcga-ig-a4qs | value | 71 | 1 | 118 | NA  | iiib | t3 | n2 | m0 | male   | 2012 | no  | NA | esophagus adenocarcinoma, nos     |
| tcga-ig-a4qt | value | 56 | 1 | 283 | NA  | ia   | t3 | n0 | m0 | male   | 2012 | yes | NA | esophagus squamous cell carcinoma |
| tcga-ig-a50l | value | 58 | 0 | NA  | 16  | iiia | t3 | n1 | m0 | male   | 2012 | NA  | NA | esophagus squamous cell carcinoma |
| tcga-ig-a51d | value | 63 | 0 | NA  | 518 | iib  | t1 | n1 | m0 | male   | 2012 | no  | 80 | esophagus squamous cell carcinoma |
| tcga-ig-a5b8 | value | 72 | 1 | 24  | NA  | ib   | t3 | n0 | m0 | male   | 2012 | no  | NA | esophagus squamous cell carcinoma |
| tcga-ig-a5s3 | value | 69 | 0 | NA  | 712 | iib  | t3 | n0 | m0 | female | 2012 | no  | 80 | esophagus squamous cell carcinoma |
| tcga-ig-a625 | value | 60 | 1 | 390 | NA  | iiib | t3 | n2 | m0 | male   | 2012 | NA  | NA | esophagus squamous cell carcinoma |
| tcga-ig-a6qs | value | 54 | 1 | 303 | NA  | iib  | t2 | n1 | m0 | male   | 2013 | no  | NA | esophagus squamous cell carcinoma |

|              |       |    |   |     |      |      |     |    |    |        |      |     |    |                                   |
|--------------|-------|----|---|-----|------|------|-----|----|----|--------|------|-----|----|-----------------------------------|
| tcga-ig-a7dp | value | 50 | 0 | NA  | 452  | iiia | t4a | nx | mx | female | 2013 | no  | 90 | esophagus adenocarcinoma, nos     |
| tcga-ig-a8o2 | value | 62 | 1 | 142 | NA   | iiib | t3  | n2 | m0 | male   | 2013 | NA  | NA | esophagus squamous cell carcinoma |
| tcga-ig-a97h | value | 36 | 0 | NA  | 441  | ia   | t3  | nx | m0 | male   | 2013 | NA  | NA | esophagus squamous cell carcinoma |
| tcga-ig-a97i | value | 58 | 0 | NA  | 370  | ia   | t2  | n0 | m0 | male   | 2013 | yes | NA | esophagus squamous cell carcinoma |
| tcga-jy-a6f8 | value | 56 | 0 | NA  | 3714 | i    | t1  | n0 | m0 | male   | 2003 | no  | NA | esophagus adenocarcinoma, nos     |
| tcga-jy-a6fa | value | 51 | 1 | ### | NA   | iib  | t2  | n1 | m0 | male   | 2006 | no  | NA | esophagus squamous cell carcinoma |
| tcga-jy-a6fd | value | 51 | 0 | NA  | 2069 | ia   | t3  | n0 | m0 | female | 2008 | no  | NA | esophagus squamous cell carcinoma |
| tcga-jy-a6fe | value | 49 | 1 | 112 | NA   | iii  | t3  | n1 | m0 | male   | 2009 | no  | NA | esophagus squamous cell carcinoma |
| tcga-jy-a6fg | value | 50 | 1 | ### | NA   | iii  | t3  | n1 | m0 | male   | 2009 | no  | NA | esophagus squamous cell carcinoma |

|              |       |    |   |     |      |      |    |    |    |        |      |     |    |                                   |
|--------------|-------|----|---|-----|------|------|----|----|----|--------|------|-----|----|-----------------------------------|
| tcga-jy-a6fh | value | 53 | 0 | NA  | 1441 | iib  | t2 | n1 | m0 | male   | 2010 | no  | NA | esophagus adenocarcinoma, nos     |
| tcga-jy-a939 | value | 77 | 0 | NA  | 660  | iib  | t1 | n1 | m0 | male   | 2012 | no  | NA | esophagus adenocarcinoma, nos     |
| tcga-jy-a93c | value | 47 | 0 | NA  | 705  | iiib | t3 | n2 | m0 | male   | 2011 | no  | NA | esophagus adenocarcinoma, nos     |
| tcga-jy-a93d | value | 51 | 1 | 960 | NA   | iiic | t2 | n3 | m0 | male   | 2012 | yes | NA | esophagus adenocarcinoma, nos     |
| tcga-jy-a93e | value | 61 | 0 | NA  | 767  | iiia | t3 | n1 | m0 | male   | 2012 | no  | NA | esophagus adenocarcinoma, nos     |
| tcga-jy-a93f | value | 58 | 0 | NA  | 731  | ib   | t2 | n0 | m0 | female | 2012 | no  | NA | esophagus squamous cell carcinoma |
| tcga-kh-a6wc | value | 82 | 0 | NA  | 191  | ia   | t1 | n0 | m0 | male   | 2013 | yes | 70 | esophagus squamous cell carcinoma |
| tcga-l5-a43c | value | 81 | 0 | NA  | 96   | NA   | NA | NA | NA | male   | 2009 | no  | NA | esophagus adenocarcinoma, nos     |
| tcga-l5-a43e | value | 74 | 0 | NA  | 920  | i    | t1 | n0 | m0 | male   | 2011 | no  | NA | esophagus adenocarcinoma, nos     |

|              |       |    |   |     |     |      |    |    |    |        |      |    |    |                                   |
|--------------|-------|----|---|-----|-----|------|----|----|----|--------|------|----|----|-----------------------------------|
| tcga-l5-a43h | value | 75 | 1 | 9   | NA  | iii  | t3 | n1 | m0 | male   | 2011 | no | NA | esophagus squamous cell carcinoma |
| tcga-l5-a4of | value | 63 | 1 | 801 | NA  | iib  | t1 | n1 | NA | male   | 2012 | no | NA | esophagus adenocarcinoma, nos     |
| tcga-l5-a4oh | value | 71 | 0 | NA  | 992 | i    | t1 | n0 | m0 | male   | 2012 | no | NA | esophagus adenocarcinoma, nos     |
| tcga-l5-a4oj | value | 70 | 0 | NA  | 639 | i    | t1 | n0 | m0 | female | 2012 | no | NA | esophagus adenocarcinoma, nos     |
| tcga-l5-a4om | value | 54 | 1 | ### | NA  | ia   | t1 | n0 | NA | female | 2010 | no | NA | esophagus squamous cell carcinoma |
| tcga-l5-a4on | value | 65 | 1 | 558 | NA  | iib  | t1 | n1 | NA | male   | 2010 | NA | NA | esophagus adenocarcinoma, nos     |
| tcga-l5-a4oo | value | 75 | 0 | NA  | 101 | iiic | t3 | n3 | m0 | male   | 2010 | NA | NA | esophagus adenocarcinoma, nos     |
| tcga-l5-a4op | value | 67 | 0 | NA  | 218 | ia   | t1 | n0 | mx | female | 2010 | NA | NA | esophagus adenocarcinoma, nos     |
| tcga-l5-a4oq | value | 75 | 1 | 42  | NA  | iiia | t2 | n2 | mx | male   | 2010 | no | NA | esophagus adenocarcinoma, nos     |



|              |       |    |   |     |      |     |    |    |     |        |      |     |    |                                   |
|--------------|-------|----|---|-----|------|-----|----|----|-----|--------|------|-----|----|-----------------------------------|
| tcga-l5-a4or | value | 83 | 1 | 96  | NA   | ia  | t1 | n0 | mx  | male   | 2010 | no  | NA | esophagus adenocarcinoma, nos     |
| tcga-l5-a4os | value | 86 | 0 | NA  | 1782 | iib | t2 | n1 | m0  | female | 2010 | no  | NA | esophagus adenocarcinoma, nos     |
| tcga-l5-a4ot | value | 77 | 1 | 149 | NA   | iv  | t3 | n1 | m1a | male   | 2006 | no  | NA | esophagus adenocarcinoma, nos     |
| tcga-l5-a4ou | value | 81 | 0 | NA  | 882  | ia  | t3 | n0 | m0  | male   | 2009 | no  | NA | esophagus adenocarcinoma, nos     |
| tcga-l5-a4ow | value | 56 | 1 | 217 | NA   | iib | t2 | n1 | m0  | female | 2006 | no  | NA | esophagus adenocarcinoma, nos     |
| tcga-l5-a4ox | value | 60 | 1 | 226 | NA   | iib | t2 | n1 | m0  | male   | 2006 | no  | NA | esophagus adenocarcinoma, nos     |
| tcga-l5-a88s | value | 84 | 0 | NA  | 471  | ib  | t3 | n0 | mx  | male   | 2013 | no  | NA | esophagus squamous cell carcinoma |
| tcga-l5-a88v | value | 60 | 0 | NA  | 79   | iii | t3 | n1 | mx  | male   | 2007 | no  | NA | esophagus adenocarcinoma, nos     |
| tcga-l5-a88w | value | 67 | 1 | 764 | NA   | ia  | t3 | n0 | mx  | male   | 2007 | yes | NA | esophagus squamous cell carcinoma |

|              |       |    |   |     |      |      |    |    |     |        |      |    |    |                                   |
|--------------|-------|----|---|-----|------|------|----|----|-----|--------|------|----|----|-----------------------------------|
| tcga-l5-a88z | value | 70 | 0 | NA  | 225  | iiia | t1 | n1 | m0  | female | 2005 | no | NA | esophagus squamous cell carcinoma |
| tcga-l5-a891 | value | 51 | 0 | NA  | 114  | NA   | t3 | n1 | m0  | male   | 2005 | NA | NA | esophagus adenocarcinoma, nos     |
| tcga-l5-a893 | value | 71 | 0 | NA  | 92   | i    | t1 | n0 | m0  | female | 2005 | no | NA | esophagus adenocarcinoma, nos     |
| tcga-l5-a8ne | value | 77 | 0 | NA  | 1688 | iiib | t2 | n1 | m0  | male   | 2000 | no | NA | esophagus adenocarcinoma, nos     |
| tcga-l5-a8nf | value | 57 | 1 | 81  | NA   | iva  | t1 | n0 | m1a | male   | 2001 | no | NA | esophagus adenocarcinoma, nos     |
| tcga-l5-a8nh | value | 54 | 1 | 393 | NA   | iv   | t1 | n0 | m1  | male   | 2001 | NA | NA | esophagus adenocarcinoma, nos     |
| tcga-l5-a8ni | value | 79 | 1 | 410 | NA   | iii  | t3 | n1 | m0  | male   | 2004 | no | NA | esophagus adenocarcinoma, nos     |
| tcga-l5-a8nj | value | 77 | 0 | NA  | 501  | iii  | t3 | n1 | m0  | male   | 2000 | no | NA | esophagus adenocarcinoma, nos     |
| tcga-l5-a8nk | value | 84 | 0 | NA  | 412  | iiia | t3 | n0 | m0  | female | 2004 | NA | NA | esophagus squamous cell carcinoma |

|              |       |    |   |     |     |     |    |    |    |        |      |     |    |                                   |
|--------------|-------|----|---|-----|-----|-----|----|----|----|--------|------|-----|----|-----------------------------------|
| tcga-l5-a8nl | value | 56 | 0 | NA  | 402 | iii | t3 | n1 | m0 | male   | 2004 | NA  | NA | esophagus adenocarcinoma, nos     |
| tcga-l5-a8nm | value | 84 | 1 | 236 | NA  | iib | t2 | n1 | m0 | female | 2004 | no  | NA | esophagus adenocarcinoma, nos     |
| tcga-l5-a8nn | value | 81 | 0 | NA  | 167 | iii | t3 | n1 | m0 | male   | 2004 | no  | NA | esophagus adenocarcinoma, nos     |
| tcga-l5-a8nq | value | 71 | 1 | 650 | NA  | iia | t2 | n0 | m0 | male   | 2001 | no  | NA | esophagus squamous cell carcinoma |
| tcga-l5-a8nr | value | 81 | 0 | NA  | 265 | iii | t3 | n1 | m0 | female | 2001 | no  | NA | esophagus adenocarcinoma, nos     |
| tcga-l5-a8ns | value | 76 | 0 | NA  | 408 | iib | t3 | n0 | m0 | male   | 2001 | yes | NA | esophagus adenocarcinoma, nos     |
| tcga-l5-a8nu | value | 84 | 1 | ### | NA  | iia | t2 | n0 | m0 | male   | 2001 | NA  | NA | esophagus adenocarcinoma, nos     |
| tcga-l5-a8nv | value | 75 | 1 | ### | NA  | iia | t3 | n0 | m0 | male   | 2001 | no  | NA | esophagus adenocarcinoma, nos     |
| tcga-l5-a8nw | value | 55 | 1 | ### | NA  | ib  | t2 | n1 | m0 | male   | 2001 | no  | NA | esophagus adenocarcinoma, nos     |

|              |       |    |   |     |     |      |    |    |    |      |      |     |    |                                   |
|--------------|-------|----|---|-----|-----|------|----|----|----|------|------|-----|----|-----------------------------------|
| tcga-l7-a56g | value | 66 | 1 | 330 | NA  | NA   | NA | NA | NA | male | 2012 | yes | NA | esophagus squamous cell carcinoma |
| tcga-l7-a6vz | value | 62 | 0 | NA  | 315 | iiic | t3 | n3 | mx | male | 2013 | yes | NA | esophagus adenocarcinoma, nos     |
| tcga-ln-a49k | value | 66 | 1 | 180 | NA  | iiia | t3 | n0 | m0 | male | 2010 | no  | 60 | esophagus squamous cell carcinoma |
| tcga-ln-a49l | value | 44 | 1 | 318 | NA  | iiia | t2 | n0 | m0 | male | 2010 | yes | 60 | esophagus squamous cell carcinoma |
| tcga-ln-a49m | value | 62 | 0 | NA  | 385 | iiia | t2 | n0 | m0 | male | 2010 | yes | 60 | esophagus squamous cell carcinoma |
| tcga-ln-a49n | value | 50 | 0 | NA  | 378 | iiib | t2 | n1 | m0 | male | 2010 | no  | 80 | esophagus squamous cell carcinoma |
| tcga-ln-a49o | value | 47 | 0 | NA  | 408 | iiia | t3 | n0 | m0 | male | 2011 | yes | 60 | esophagus squamous cell carcinoma |
| tcga-ln-a49p | value | 71 | 0 | NA  | 375 | iiia | t3 | n0 | m0 | male | 2011 | yes | 40 | esophagus squamous cell carcinoma |
| tcga-ln-a49r | value | 46 | 0 | NA  | 407 | iii  | t3 | n1 | m0 | male | 2011 | yes | 60 | esophagus squamous cell carcinoma |

|              |       |    |   |    |     |      |    |    |    |      |      |     |    |                                   |
|--------------|-------|----|---|----|-----|------|----|----|----|------|------|-----|----|-----------------------------------|
| tcga-ln-a49s | value | 59 | 0 | NA | 400 | iiia | t3 | n0 | m0 | male | 2011 | yes | 60 | esophagus squamous cell carcinoma |
| tcga-ln-a49u | value | 62 | 0 | NA | 467 | iiia | t3 | n0 | m0 | male | 2011 | yes | 60 | esophagus squamous cell carcinoma |
| tcga-ln-a49v | value | 49 | 0 | NA | 383 | iiia | t3 | n0 | m0 | male | 2011 | yes | 60 | esophagus squamous cell carcinoma |
| tcga-ln-a49w | value | 73 | 0 | NA | 403 | iii  | t3 | n1 | m0 | male | 2011 | yes | 40 | esophagus squamous cell carcinoma |
| tcga-ln-a49x | value | 44 | 0 | NA | 384 | iiia | t3 | n0 | m0 | male | 2011 | yes | 60 | esophagus squamous cell carcinoma |
| tcga-ln-a49y | value | 77 | 0 | NA | 379 | iiia | t3 | n0 | m0 | male | 2011 | no  | 20 | esophagus squamous cell carcinoma |
| tcga-ln-a4a1 | value | 60 | 0 | NA | 383 | iiia | t3 | n0 | m0 | male | 2011 | no  | 60 | esophagus squamous cell carcinoma |
| tcga-ln-a4a2 | value | 57 | 0 | NA | 380 | iiia | t3 | n0 | m0 | male | 2011 | yes | 60 | esophagus squamous cell carcinoma |
| tcga-ln-a4a3 | value | 61 | 0 | NA | 388 | iii  | t3 | n1 | m0 | male | 2011 | yes | 60 | esophagus squamous cell carcinoma |

|              |       |    |   |     |     |      |    |    |    |      |      |     |    |                                   |
|--------------|-------|----|---|-----|-----|------|----|----|----|------|------|-----|----|-----------------------------------|
| tcga-ln-a4a4 | value | 36 | 0 | NA  | 383 | iii  | t3 | n1 | m0 | male | 2011 | yes | 60 | esophagus squamous cell carcinoma |
| tcga-ln-a4a5 | value | 49 | 1 | 681 | NA  | iiia | t2 | n0 | m0 | male | 2011 | no  | 60 | esophagus squamous cell carcinoma |
| tcga-ln-a4a6 | value | 65 | 0 | NA  | 391 | ii   | t2 | n0 | m0 | male | 2012 | no  | 40 | esophagus squamous cell carcinoma |
| tcga-ln-a4a8 | value | 52 | 0 | NA  | 472 | iiia | t2 | n0 | m0 | male | 2012 | no  | 60 | esophagus squamous cell carcinoma |
| tcga-ln-a4a9 | value | 58 | 1 | 351 | NA  | iiia | t2 | n0 | m0 | male | 2012 | no  | 60 | esophagus squamous cell carcinoma |
| tcga-ln-a4mq | value | 46 | 0 | NA  | 375 | iii  | t3 | n1 | m0 | male | 2010 | no  | 60 | esophagus squamous cell carcinoma |
| tcga-ln-a4mr | value | 57 | 0 | NA  | 402 | iiia | t2 | n0 | m0 | male | 2012 | no  | 60 | esophagus squamous cell carcinoma |
| tcga-ln-a5u5 | value | 57 | 1 | 136 | NA  | iv   | t3 | n1 | m1 | male | 2012 | no  | 70 | esophagus squamous cell carcinoma |
| tcga-ln-a5u6 | value | 54 | 0 | NA  | 375 | iib  | t2 | n1 | m0 | male | 2012 | yes | 70 | esophagus squamous cell carcinoma |

|              |       |    |   |    |     |     |    |    |    |        |      |     |    |                                   |
|--------------|-------|----|---|----|-----|-----|----|----|----|--------|------|-----|----|-----------------------------------|
| tcga-ln-a5u7 | value | 46 | 0 | NA | 768 | IIA | T2 | N0 | M0 | male   | 2012 | no  | 70 | esophagus squamous cell carcinoma |
| tcga-ln-a7hv | value | 58 | 0 | NA | 320 | IIA | T2 | N0 | M0 | male   | 2012 | yes | 70 | esophagus squamous cell carcinoma |
| tcga-ln-a7hw | value | 59 | 0 | NA | 365 | IIA | T2 | N0 | M0 | male   | 2013 | no  | 70 | esophagus squamous cell carcinoma |
| tcga-ln-a7hx | value | 72 | 0 | NA | 372 | IIA | T2 | N0 | M0 | male   | 2013 | yes | 50 | esophagus squamous cell carcinoma |
| tcga-ln-a7hy | value | 50 | 0 | NA | 366 | III | T3 | N1 | M0 | male   | 2013 | no  | 70 | esophagus squamous cell carcinoma |
| tcga-ln-a7hz | value | 49 | 0 | NA | 401 | IIA | T2 | N0 | M0 | male   | 2013 | no  | 90 | esophagus squamous cell carcinoma |
| tcga-ln-a8hz | value | 56 | 0 | NA | 375 | IIA | T2 | N0 | M0 | male   | 2013 | yes | NA | esophagus squamous cell carcinoma |
| tcga-ln-a8i0 | value | 52 | 0 | NA | 407 | IIA | T2 | N0 | M0 | male   | 2013 | no  | NA | esophagus squamous cell carcinoma |
| tcga-ln-a8i1 | value | 67 | 0 | NA | 401 | IIA | T2 | N0 | M0 | female | 2013 | yes | NA | esophagus squamous cell carcinoma |

|              |       |    |   |     |      |      |    |    |    |        |      |     |    |                                   |
|--------------|-------|----|---|-----|------|------|----|----|----|--------|------|-----|----|-----------------------------------|
| tcga-ln-a9fo | value | 42 | 0 | NA  | 4    | iiia | t2 | n0 | m0 | male   | 2013 | no  | NA | esophagus squamous cell carcinoma |
| tcga-ln-a9fp | value | 60 | 0 | NA  | 366  | iiia | t2 | n0 | m0 | female | 2013 | yes | NA | esophagus squamous cell carcinoma |
| tcga-ln-a9fq | value | 62 | 0 | NA  | 391  | iiia | t3 | n0 | m0 | male   | 2013 | no  | NA | esophagus squamous cell carcinoma |
| tcga-ln-a9fr | value | 70 | 0 | NA  | 373  | iiib | t2 | n1 | m0 | male   | 2013 | yes | NA | esophagus squamous cell carcinoma |
| tcga-m9-a5m8 | value | 58 | 0 | NA  | 1007 | iiia | t3 | n0 | m0 | male   | NA   | no  | NA | esophagus adenocarcinoma, nos     |
| tcga-q9-a6fw | value | 61 | 0 | NA  | 238  | iiib | t3 | n2 | m0 | male   | 2013 | no  | NA | esophagus adenocarcinoma, nos     |
| tcga-r6-a6dn | value | 58 | 1 | 244 | NA   | NA   | NA | NA | NA | male   | 2011 | NA  | NA | esophagus adenocarcinoma, nos     |
| tcga-r6-a6dq | value | 74 | 1 | 231 | NA   | NA   | NA | NA | NA | female | 2010 | NA  | NA | esophagus adenocarcinoma, nos     |
| tcga-r6-a6kz | value | 42 | 1 | 154 | NA   | NA   | NA | NA | NA | male   | 2010 | no  | NA | esophagus adenocarcinoma, nos     |



|              |       |    |   |     |      |     |    |    |     |      |      |    |    |                               |
|--------------|-------|----|---|-----|------|-----|----|----|-----|------|------|----|----|-------------------------------|
| tcga-r6-a6l4 | value | 27 | 1 | 496 | NA   | NA  | NA | NA | NA  | male | 2012 | no | NA | esophagus adenocarcinoma, nos |
| tcga-r6-a6l6 | value | 68 | 1 | 214 | NA   | NA  | NA | NA | NA  | male | 2010 | no | NA | esophagus adenocarcinoma, nos |
| tcga-r6-a6xg | value | 64 | 0 | NA  | 1168 | NA  | NA | NA | NA  | male | 2011 | no | NA | esophagus adenocarcinoma, nos |
| tcga-r6-a6xq | value | 58 | 1 | 193 | NA   | NA  | NA | NA | NA  | male | 2008 | no | NA | esophagus adenocarcinoma, nos |
| tcga-r6-a6y0 | value | 54 | 0 | NA  | 1641 | NA  | NA | NA | NA  | male | 2005 | no | NA | esophagus adenocarcinoma, nos |
| tcga-r6-a6y2 | value | 71 | 1 | 283 | NA   | NA  | NA | NA | NA  | male | 2005 | no | NA | esophagus adenocarcinoma, nos |
| tcga-r6-a8w5 | value | 60 | 1 | 480 | NA   | iva | t3 | n1 | m1a | male | 2004 | no | NA | esophagus adenocarcinoma, nos |
| tcga-r6-a8w8 | value | 72 | 1 | 88  | NA   | NA  | NA | NA | NA  | male | 2012 | no | NA | esophagus adenocarcinoma, nos |
| tcga-r6-a8wc | value | 56 | 0 | NA  | 70   | NA  | NA | NA | NA  | male | 2013 | NA | NA | esophagus adenocarcinoma, nos |

|              |       |    |   |     |     |     |    |    |    |        |      |     |    |                                   |
|--------------|-------|----|---|-----|-----|-----|----|----|----|--------|------|-----|----|-----------------------------------|
| tcga-r6-a8wg | value | 60 | 1 | 386 | NA  | NA  | NA | NA | NA | male   | 2013 | no  | NA | esophagus adenocarcinoma, nos     |
| tcga-re-a7bo | value | 72 | 1 | 213 | NA  | iib | t1 | n1 | m0 | female | 2006 | no  | NA | esophagus adenocarcinoma, nos     |
| tcga-s8-a6bw | value | 51 | 0 | NA  | 620 | ib  | t2 | n0 | mx | male   | 2012 | no  | NA | esophagus squamous cell carcinoma |
| tcga-v5-a7rb | value | 59 | 1 | 161 | NA  | NA  | t0 | n1 | mx | male   | NA   | no  | 90 | esophagus adenocarcinoma, nos     |
| tcga-v5-a7rc | value | 55 | 1 | 104 | NA  | NA  | NA | NA | NA | male   | NA   | yes | 80 | esophagus squamous cell carcinoma |
| tcga-v5-a7re | value | 45 | 0 | NA  | 500 | ib  | t1 | n0 | m0 | male   | NA   | yes | 90 | esophagus adenocarcinoma, nos     |
| tcga-v5-aasv | value | 67 | 0 | NA  | 467 | iib | t3 | n0 | mx | male   | NA   | yes | 80 | esophagus squamous cell carcinoma |
| tcga-v5-aasw | value | 72 | 0 | NA  | 282 | NA  | NA | NA | NA | male   | NA   | yes | 60 | esophagus adenocarcinoma, nos     |
| tcga-v5-aasx | value | 74 | 0 | NA  | 273 | NA  | NA | NA | NA | male   | NA   | NA  | 90 | esophagus adenocarcinoma, nos     |

|              |       |    |   |     |      |      |    |    |     |        |      |     |     |                                   |
|--------------|-------|----|---|-----|------|------|----|----|-----|--------|------|-----|-----|-----------------------------------|
| tcga-vr-a8eo | value | 49 | 0 | NA  | 785  | iiia | t3 | n0 | m0  | male   | 2013 | yes | 90  | esophagus squamous cell carcinoma |
| tcga-vr-a8ep | value | 51 | 0 | NA  | 824  | iiib | t3 | n2 | m0  | male   | 2013 | no  | 90  | esophagus squamous cell carcinoma |
| tcga-vr-a8eq | value | 73 | 1 | 694 | NA   | iii  | t3 | n1 | m0  | male   | 2009 | yes | 90  | esophagus adenocarcinoma, nos     |
| tcga-vr-a8er | value | 54 | 1 | 378 | NA   | iii  | t4 | n1 | m0  | male   | 2009 | yes | 80  | esophagus squamous cell carcinoma |
| tcga-vr-a8et | value | 64 | 1 | 47  | NA   | iiia | t2 | n0 | m0  | male   | 2010 | no  | 90  | esophagus squamous cell carcinoma |
| tcga-vr-a8eu | value | 51 | 1 | 557 | NA   | iv   | t1 | n1 | m1  | male   | 2011 | yes | 80  | esophagus squamous cell carcinoma |
| tcga-vr-a8ew | value | 57 | 1 | 247 | NA   | iiib | t3 | n2 | m0  | male   | 2012 | no  | 100 | esophagus squamous cell carcinoma |
| tcga-vr-a8ex | value | 63 | 1 | 855 | NA   | iva  | t1 | n1 | m1a | male   | 2009 | no  | 90  | esophagus squamous cell carcinoma |
| tcga-vr-a8ey | value | 44 | 0 | NA  | 1025 | iiia | t3 | n0 | m0  | female | 2012 | no  | 90  | esophagus squamous cell carcinoma |

|              |       |    |   |     |      |      |    |    |    |        |      |     |    |                                   |
|--------------|-------|----|---|-----|------|------|----|----|----|--------|------|-----|----|-----------------------------------|
| tcga-vr-a8ez | value | 47 | 1 | 553 | NA   | iiic | t3 | n3 | m0 | male   | 2013 | no  | 90 | esophagus squamous cell carcinoma |
| tcga-vr-a8q7 | value | 60 | 0 | NA  | 1590 | iiia | t3 | n1 | m0 | male   | 2010 | no  | 90 | esophagus squamous cell carcinoma |
| tcga-vr-aa4d | value | 53 | 1 | ### | NA   | iib  | t1 | n1 | m0 | male   | 2010 | yes | 90 | esophagus adenocarcinoma, nos     |
| tcga-vr-aa4g | value | 51 | 0 | NA  | 549  | iiia | t2 | n2 | m0 | female | 2013 | no  | 90 | esophagus squamous cell carcinoma |
| tcga-vr-aa7b | value | 65 | 0 | NA  | 342  | iv   | t3 | n3 | m1 | female | 2011 | no  | 90 | esophagus squamous cell carcinoma |
| tcga-vr-aa7d | value | 58 | 1 | 279 | NA   | iiic | t3 | n3 | m0 | male   | 2012 | yes | 90 | esophagus squamous cell carcinoma |
| tcga-vr-aa7i | value | 70 | 1 | 484 | NA   | iii  | t4 | n0 | m0 | male   | 2010 | no  | 90 | esophagus squamous cell carcinoma |
| tcga-x8-aaar | value | 69 | 0 | NA  | 554  | NA   | t1 | n1 | NA | male   | 2013 | no  | NA | esophagus adenocarcinoma, nos     |
| tcga-xp-a8t6 | value | 54 | 1 | 763 | NA   | iib  | t2 | n1 | m0 | male   | 2009 | no  | 90 | esophagus squamous cell carcinoma |

|              |       |    |   |     |      |      |    |    |    |        |      |     |    |                                   |
|--------------|-------|----|---|-----|------|------|----|----|----|--------|------|-----|----|-----------------------------------|
| tcga-xp-a8t7 | value | 63 | 0 | NA  | 1254 | iiia | t2 | n0 | m0 | female | 2010 | no  | 90 | esophagus squamous cell carcinoma |
| tcga-xp-a8t8 | value | 49 | 0 | NA  | 437  | iib  | t1 | n1 | m0 | male   | 2011 | yes | 90 | esophagus squamous cell carcinoma |
| tcga-z6-a8jd | value | 53 | 0 | NA  | 104  | iib  | t3 | n0 | m0 | male   | 2013 | no  | 90 | esophagus squamous cell carcinoma |
| tcga-z6-a8je | value | 57 | 0 | NA  | 64   | iiia | t3 | n1 | m0 | male   | 2013 | no  | 80 | esophagus squamous cell carcinoma |
| tcga-z6-a9vb | value | 53 | 0 | NA  | 40   | iiia | t3 | n1 | m0 | male   | 2013 | no  | NA | esophagus squamous cell carcinoma |
| tcga-z6-aapn | value | 57 | 0 | NA  | 81   | iiia | t3 | n0 | m0 | male   | 2013 | no  | NA | esophagus squamous cell carcinoma |
| tcga-zr-a9cj | value | 65 | 1 | 600 | NA   | iiic | t3 | n3 | mx | male   | 2012 | no  | NA | esophagus adenocarcinoma, nos     |
