# Supplementary material for: Novel lncRNA Panel as for Prognosis in Esophageal Squamous Cell Carcinoma Based on ceRNA Network Mechanism
Source: Hindawi journal article supplement (doi:10.1155/2021/8020879), 2021-09-24
Supplement: f1 [file 8020879.f1.zip]

|          | logFC    | AveExpr  | t        | PValue   | FDR      | B        |
|----------|----------|----------|----------|----------|----------|----------|
| ZBTB16   | -5.708   | 0.478328 | -16.2072 | 4.00E-38 | 5.59E-34 | 75.82938 |
| GREM2    | -5.19514 | 0.404614 | -15.5538 | 3.88E-36 | 2.71E-32 | 71.30432 |
| DPT      | -4.87027 | 1.378178 | -15.1062 | 9.00E-35 | 4.19E-31 | 68.29138 |
| GPFR     | -3.87544 | 1.474592 | -14.7611 | 1.02E-33 | 3.57E-30 | 65.8634  |
| AFF3     | -4.31782 | 0.635851 | -14.4673 | 8.13E-33 | 2.27E-29 | 63.76381 |
| NCAM1    | -4.77437 | 0.999751 | -14.3925 | 1.38E-32 | 3.21E-29 | 63.31673 |
| FAM107A  | -4.40799 | 1.547215 | -14.0927 | 1.14E-31 | 2.28E-28 | 61.25766 |
| KLF15    | -4.52699 | 0.455686 | -13.9093 | 4.17E-31 | 7.29E-28 | 59.89729 |
| P2RY14   | -3.51307 | 0.823192 | -13.8114 | 8.33E-31 | 1.29E-27 | 59.16148 |
| GPR133   | -4.65729 | 1.080201 | -13.4221 | 1.30E-29 | 1.82E-26 | 56.58294 |
| CLEC3B   | -3.61456 | 1.433502 | -13.2327 | 4.95E-29 | 6.28E-26 | 55.24911 |
| GNG7     | -3.49441 | 1.479336 | -13.0738 | 1.52E-28 | 1.77E-25 | 54.14625 |
| KL       | -3.54113 | 0.396847 | -12.7412 | 1.58E-27 | 1.70E-24 | 51.69477 |
| RBPMS2   | -3.79491 | 2.018109 | -12.6697 | 2.61E-27 | 2.56E-24 | 51.38372 |
| PTGER3   | -4.4979  | 1.581038 | -12.6622 | 2.75E-27 | 2.56E-24 | 51.33001 |
| SLC2A4   | -3.99188 | 0.948888 | -12.5618 | 5.57E-27 | 4.86E-24 | 50.59542 |
| CAB39L   | -2.82554 | 3.290735 | -12.4631 | 1.11E-26 | 9.15E-24 | 49.96318 |
| ABCA8    | -5.09215 | 0.327674 | -12.3578 | 2.33E-26 | 1.81E-23 | 49.1943  |
| C7       | -6.0889  | 1.055167 | -12.0999 | 1.42E-25 | 1.04E-22 | 47.44555 |
| ADAMTSL1 | -3.834   | 1.558904 | -11.98   | 3.28E-25 | 2.29E-22 | 46.61452 |
| SCUBE2   | -3.83871 | 1.113053 | -11.7518 | 1.61E-24 | 1.07E-21 | 45.03468 |
| MAMDC2   | -4.17594 | 1.241133 | -11.7185 | 2.03E-24 | 1.29E-21 | 44.81886 |
| PLIN4    | -3.9591  | 2.045846 | -11.6823 | 2.61E-24 | 1.59E-21 | 44.57969 |
| ZNF471   | -3.3718  | 0.194441 | -11.6086 | 4.36E-24 | 2.54E-21 | 43.90245 |
| GFRA1    | -4.31582 | 1.635311 | -11.5412 | 6.96E-24 | 3.89E-21 | 43.6133  |
| GPR155   | -3.91064 | 4.068626 | -11.52   | 8.07E-24 | 4.34E-21 | 43.46693 |
| SLC16A7  | -3.53822 | 1.346629 | -11.4204 | 1.61E-23 | 8.03E-21 | 42.7754  |
| CARNS1   | -3.06796 | 0.719505 | -11.4255 | 1.55E-23 | 8.03E-21 | 42.71662 |
| PNPLA7   | -3.38267 | 1.82562  | -11.2768 | 4.35E-23 | 2.03E-20 | 41.80761 |
| STX12    | -1.82105 | 5.763368 | -11.2768 | 4.35E-23 | 2.03E-20 | 41.80178 |
| C3orf18  | -2.64284 | 0.801599 | -11.2479 | 5.31E-23 | 2.39E-20 | 41.47024 |
| HSPB7    | -4.25221 | 1.659471 | -11.2411 | 5.57E-23 | 2.43E-20 | 41.56719 |
| PHYHD1   | -3.55307 | 1.147454 | -11.1283 | 1.21E-22 | 5.13E-20 | 40.78756 |
| MYOCD    | -4.23868 | 1.072564 | -11.1139 | 1.34E-22 | 5.50E-20 | 40.69996 |
| GPR146   | -2.12322 | 1.722042 | -11.0883 | 1.60E-22 | 6.37E-20 | 40.47523 |
| LYVE1    | -3.33822 | 1.084444 | -10.9395 | 4.44E-22 | 1.71E-19 | 39.50407 |
| RNF180   | -2.91672 | 0.93131  | -10.9371 | 4.52E-22 | 1.71E-19 | 39.44744 |
| OGN      | -4.24617 | 1.397064 | -10.8644 | 7.44E-22 | 2.73E-19 | 39.01666 |
| MLYCD    | -1.42351 | 3.137478 | -10.85   | 8.21E-22 | 2.94E-19 | 38.91843 |
| LONRF2   | -4.62299 | 1.310689 | -10.7745 | 1.38E-21 | 4.81E-19 | 38.41042 |
| MKI67    | 3.344343 | 7.859228 | 10.76926 | 1.43E-21 | 4.86E-19 | 38.37502 |
| CRY2     | -1.79908 | 4.838847 | -10.7612 | 1.51E-21 | 5.01E-19 | 38.3024  |
| PARK2    | -3.10299 | 0.034613 | -10.7275 | 1.90E-21 | 6.17E-19 | 37.91832 |
| ATOH8    | -3.13148 | 0.813063 | -10.7162 | 2.05E-21 | 6.51E-19 | 37.97458 |
| RGMB     | -2.48761 | 5.195186 | -10.671  | 2.79E-21 | 8.67E-19 | 37.69679 |
| CGNL1    | -3.65256 | 3.107821 | -10.6104 | 4.22E-21 | 1.28E-18 | 37.29552 |
| NEGR1    | -3.38341 | 1.849295 | -10.5972 | 4.62E-21 | 1.37E-18 | 37.22092 |
| TPX2     | 3.843326 | 6.80741  | 10.56339 | 5.81E-21 | 1.69E-18 | 36.92729 |
| SLC25A4  | -2.43131 | 4.299226 | -10.5459 | 6.55E-21 | 1.87E-18 | 36.85461 |
| HIF3A    | -4.23415 | 1.38313  | -10.4624 | 1.16E-20 | 3.23E-18 | 36.31908 |
| CCL14    | -3.91193 | 0.464062 | -10.4331 | 1.41E-20 | 3.86E-18 | 36.11123 |
| KIF4B    | 3.411734 | 0.008927 | 10.38465 | 1.96E-20 | 5.26E-18 | 34.26781 |
| C7orf41  | -2.5795  | 4.633811 | -10.3242 | 2.95E-20 | 7.77E-18 | 35.37135 |
| CHRD1    | -5.06559 | 0.765084 | -10.2738 | 4.15E-20 | 1.07E-17 | 35.06459 |
| RYS2     | -3.93202 | 1.154009 | -10.2377 | 5.29E-20 | 1.34E-17 | 34.82663 |
| PGM5     | -4.2535  | 1.969816 | -10.2258 | 5.73E-20 | 1.43E-17 | 34.73675 |
| FAM165B  | -1.88439 | 2.57935  | -10.2127 | 6.26E-20 | 1.53E-17 | 34.66146 |

|           |          |          |          |          |          |          |
|-----------|----------|----------|----------|----------|----------|----------|
| DUSP19    | -2.25061 | 2.200643 | -10.2059 | 6.55E-20 | 1.58E-17 | 34.61628 |
| RAB11FIP2 | -1.84422 | 4.754311 | -10.169  | 8.40E-20 | 1.99E-17 | 34.33703 |
| HSPB6     | -4.33774 | 3.218414 | -10.1576 | 9.07E-20 | 2.11E-17 | 34.27331 |
| ITGA8     | -4.04988 | 1.151921 | -10.1384 | 1.03E-19 | 2.37E-17 | 34.16976 |
| ZNF626    | -3.15625 | 0.868221 | -10.0996 | 1.34E-19 | 3.02E-17 | 33.89849 |
| FAM189A2  | -3.77585 | 0.55737  | -10.0339 | 2.09E-19 | 4.62E-17 | 33.4747  |
| KIT       | -3.35998 | 2.825792 | -10.0127 | 2.40E-19 | 5.19E-17 | 33.31817 |
| RGS11     | -3.29521 | 0.023985 | -10.0119 | 2.42E-19 | 5.19E-17 | 33.24847 |
| TMOD1     | -2.9306  | 2.535242 | -10.005  | 2.53E-19 | 5.36E-17 | 33.27921 |
| ADAM33    | -3.30506 | 1.015645 | -9.99418 | 2.72E-19 | 5.67E-17 | 33.21731 |
| ALDH6A1   | -2.21305 | 3.980441 | -9.90122 | 5.07E-19 | 1.04E-16 | 32.57295 |
| C5orf4    | -2.56131 | 2.949548 | -9.80491 | 9.64E-19 | 1.95E-16 | 31.95985 |
| RCAN2     | -2.87752 | 3.297744 | -9.75582 | 1.34E-18 | 2.67E-16 | 31.62457 |
| MMRN1     | -3.56598 | 1.487707 | -9.74318 | 1.45E-18 | 2.86E-16 | 31.57434 |
| GCNT4     | -2.9082  | 1.119176 | -9.71308 | 1.77E-18 | 3.44E-16 | 31.37685 |
| TMEM161B  | -1.52366 | 3.493576 | -9.57626 | 4.39E-18 | 8.41E-16 | 30.47536 |
| KIAA0427  | -2.00613 | 4.955107 | -9.55342 | 5.11E-18 | 9.64E-16 | 30.28834 |
| LEPR      | -2.90363 | 3.750013 | -9.48036 | 8.27E-18 | 1.54E-15 | 29.82132 |
| FAM54B    | -1.32594 | 4.727834 | -9.4783  | 8.38E-18 | 1.54E-15 | 29.80679 |
| PRX       | -1.74965 | 1.967031 | -9.47045 | 8.83E-18 | 1.60E-15 | 29.80708 |
| CFD       | -3.26268 | 3.446961 | -9.44976 | 1.01E-17 | 1.81E-15 | 29.62606 |
| MITF      | -2.40894 | 3.237418 | -9.39753 | 1.43E-17 | 2.52E-15 | 29.304   |
| C22orf23  | -2.44708 | 1.632654 | -9.38384 | 1.56E-17 | 2.72E-15 | 29.25593 |
| ZNF662    | -2.84536 | 0.703001 | -9.36573 | 1.76E-17 | 3.03E-15 | 29.11927 |
| TOP2A     | 3.755411 | 7.853448 | 9.34596  | 2.00E-17 | 3.41E-15 | 29.00085 |
| KPNA2     | 2.09841  | 7.330151 | 9.336926 | 2.12E-17 | 3.57E-15 | 28.90589 |
| MFSD4     | -4.58633 | 2.70429  | -9.32748 | 2.26E-17 | 3.75E-15 | 28.8466  |
| SIK2      | -1.89319 | 5.576587 | -9.31763 | 2.41E-17 | 3.96E-15 | 28.7633  |
| EFHA2     | -2.87346 | 0.51855  | -9.29357 | 2.82E-17 | 4.58E-15 | 28.64785 |
| CENPF     | 3.366858 | 7.024015 | 9.230643 | 4.25E-17 | 6.82E-15 | 28.27491 |
| ALAD      | -1.64357 | 5.467839 | -9.20984 | 4.86E-17 | 7.72E-15 | 28.06781 |
| GNAZ      | -2.86273 | 2.032417 | -9.1817  | 5.84E-17 | 9.07E-15 | 27.94842 |
| RCC2      | 1.67512  | 7.919562 | 9.181764 | 5.84E-17 | 9.07E-15 | 27.88774 |
| MT1G      | -4.18057 | 2.912331 | -9.16304 | 6.60E-17 | 1.01E-14 | 27.78737 |
| LOC400043 | -3.09045 | 2.340741 | -9.13744 | 7.79E-17 | 1.18E-14 | 27.6504  |
| PDE2A     | -2.48383 | 2.40191  | -9.13536 | 7.90E-17 | 1.19E-14 | 27.65022 |
| CDH2      | -3.91962 | 0.771565 | -9.12148 | 8.64E-17 | 1.28E-14 | 27.57796 |
| HOXC9     | 5.137225 | 1.258094 | 9.108306 | 9.41E-17 | 1.38E-14 | 26.52632 |
| CKB       | -4.14648 | 5.425591 | -9.05323 | 1.35E-16 | 1.96E-14 | 27.09498 |
| SPHAR     | -1.40338 | 2.365058 | -8.97091 | 2.29E-16 | 3.30E-14 | 26.63147 |
| RAI2      | -2.57505 | 2.765327 | -8.87917 | 4.13E-16 | 5.89E-14 | 26.00861 |
| C8orf84   | -2.79034 | 2.172218 | -8.76426 | 8.63E-16 | 1.22E-13 | 25.30543 |
| ACAT1     | -1.73065 | 4.783882 | -8.75926 | 8.91E-16 | 1.24E-13 | 25.20842 |
| TNXB      | -4.51168 | 3.842447 | -8.72912 | 1.08E-15 | 1.49E-13 | 25.03855 |
| KIF11     | 2.875648 | 5.912534 | 8.680534 | 1.47E-15 | 2.02E-13 | 24.81584 |
| DPCR1     | -6.71826 | 0.823198 | -8.67391 | 1.53E-15 | 2.08E-13 | 24.72983 |
| CACNA2D2  | -3.05855 | 0.361667 | -8.66995 | 1.57E-15 | 2.09E-13 | 24.74132 |
| ABI3BP    | -3.80805 | 2.782478 | -8.67023 | 1.57E-15 | 2.09E-13 | 24.67251 |
| DCLK2     | -2.4145  | 0.794131 | -8.654   | 1.74E-15 | 2.30E-13 | 24.63881 |
| IPW       | -2.9127  | 2.059187 | -8.58466 | 2.70E-15 | 3.53E-13 | 24.18603 |
| ACACB     | -2.90747 | 4.005346 | -8.55049 | 3.36E-15 | 4.34E-13 | 23.90834 |
| ADAMTS8   | -3.41582 | 0.028743 | -8.54553 | 3.46E-15 | 4.44E-13 | 23.97597 |
| ANK2      | -3.24901 | 2.22528  | -8.53988 | 3.59E-15 | 4.56E-13 | 23.88988 |
| LIFR      | -3.66688 | 4.048743 | -8.53733 | 3.65E-15 | 4.59E-13 | 23.83247 |
| KIAA1191  | -1.24975 | 6.591657 | -8.52261 | 4.00E-15 | 4.99E-13 | 23.73439 |
| C14orf159 | -1.58194 | 4.769113 | -8.51152 | 4.29E-15 | 5.31E-13 | 23.66338 |
| BVES      | -2.84744 | 2.250428 | -8.50504 | 4.47E-15 | 5.48E-13 | 23.68619 |
| ROR1      | -2.78533 | 1.943277 | -8.49417 | 4.79E-15 | 5.82E-13 | 23.63624 |

|            |          |          |          |          |          |          |
|------------|----------|----------|----------|----------|----------|----------|
| TCF21      | -2.38646 | 1.778079 | -8.48953 | 4.93E-15 | 5.94E-13 | 23.62825 |
| SORBS2     | -3.46652 | 3.416506 | -8.47913 | 5.27E-15 | 6.29E-13 | 23.4732  |
| ECT2       | 2.627933 | 6.809479 | 8.476772 | 5.35E-15 | 6.33E-13 | 23.52    |
| C5orf53    | -1.55314 | 3.334366 | -8.46703 | 5.68E-15 | 6.67E-13 | 23.44616 |
| ACADS      | -1.9351  | 4.527399 | -8.45292 | 6.21E-15 | 7.23E-13 | 23.30073 |
| LGI4       | -2.34724 | 0.738536 | -8.44923 | 6.36E-15 | 7.34E-13 | 23.37828 |
| C7orf58    | -2.81513 | 2.689192 | -8.43593 | 6.91E-15 | 7.85E-13 | 23.23957 |
| SDPR       | -2.7897  | 3.507744 | -8.43686 | 6.87E-15 | 7.85E-13 | 23.21417 |
| CBX7       | -2.18737 | 4.462753 | -8.42852 | 7.24E-15 | 8.16E-13 | 23.14905 |
| GALNTL2    | -2.75024 | 1.677673 | -8.4105  | 8.11E-15 | 9.06E-13 | 23.1342  |
| AOX1       | -3.52728 | 0.604513 | -8.38425 | 9.56E-15 | 1.06E-12 | 22.99086 |
| FAM149A    | -2.9068  | 1.528458 | -8.3796  | 9.84E-15 | 1.08E-12 | 22.94604 |
| FOXM1      | 3.299487 | 6.611659 | 8.375716 | 1.01E-14 | 1.09E-12 | 22.94028 |
| IL33       | -3.42704 | 2.735755 | -8.37686 | 1.00E-14 | 1.09E-12 | 22.85914 |
| CNTD1      | -1.85711 | 1.245963 | -8.34913 | 1.19E-14 | 1.28E-12 | 22.77285 |
| ARHGAP24   | -2.04807 | 3.355605 | -8.33771 | 1.28E-14 | 1.36E-12 | 22.6294  |
| CPEB3      | -1.61376 | 3.21501  | -8.3187  | 1.44E-14 | 1.52E-12 | 22.53862 |
| PRIMA1     | -3.6549  | 1.726234 | -8.30918 | 1.53E-14 | 1.61E-12 | 22.47992 |
| EPM2A      | -1.64585 | 2.177349 | -8.29293 | 1.69E-14 | 1.76E-12 | 22.43349 |
| RRM2       | 3.45912  | 6.368686 | 8.283559 | 1.79E-14 | 1.86E-12 | 22.38398 |
| GBGT1      | -2.45033 | 1.636914 | -8.27356 | 1.91E-14 | 1.96E-12 | 22.31183 |
| SPC24      | 3.210898 | 0.975219 | 8.264478 | 2.02E-14 | 2.06E-12 | 21.58262 |
| NECAB1     | -2.76675 | 0.713295 | -8.24998 | 2.21E-14 | 2.24E-12 | 22.1806  |
| PAIP2B     | -2.90384 | 2.490535 | -8.24905 | 2.22E-14 | 2.24E-12 | 22.10058 |
| DIRAS1     | -3.22273 | 0.738628 | -8.23638 | 2.41E-14 | 2.40E-12 | 22.09404 |
| SYNJ2BP    | -1.45471 | 5.867023 | -8.22361 | 2.61E-14 | 2.58E-12 | 21.88862 |
| RIMS3      | -2.59784 | 2.463321 | -8.21884 | 2.68E-14 | 2.64E-12 | 21.92961 |
| GCOM1      | -3.35777 | 2.978862 | -8.17659 | 3.49E-14 | 3.38E-12 | 21.6277  |
| HOXC8      | 4.926706 | 1.239794 | 8.17667  | 3.49E-14 | 3.38E-12 | 21.08539 |
| DAAM2      | -2.92517 | 3.775507 | -8.14753 | 4.18E-14 | 4.02E-12 | 21.43478 |
| CDHR3      | -3.0326  | 0.176812 | -8.14102 | 4.35E-14 | 4.16E-12 | 21.51673 |
| MAL        | -5.06225 | 1.503178 | -8.1286  | 4.69E-14 | 4.46E-12 | 21.36179 |
| CDK1       | 3.080632 | 5.742513 | 8.12525  | 4.79E-14 | 4.52E-12 | 21.42693 |
| TMEM8B     | -1.87651 | 3.361984 | -8.10401 | 5.46E-14 | 5.12E-12 | 21.2121  |
| GHR        | -2.89525 | 1.669575 | -8.09562 | 5.75E-14 | 5.36E-12 | 21.2137  |
| ZSCAN18    | -2.71763 | 3.195826 | -8.09162 | 5.90E-14 | 5.46E-12 | 21.11584 |
| TTLL7      | -2.77871 | 1.681252 | -8.08426 | 6.17E-14 | 5.61E-12 | 21.14916 |
| PXMP2      | -1.705   | 3.105122 | -8.08301 | 6.22E-14 | 5.61E-12 | 21.10915 |
| VSIG2      | -5.1457  | 1.108343 | -8.08281 | 6.23E-14 | 5.61E-12 | 21.09701 |
| CDC25C     | 3.652463 | 2.433562 | 8.083875 | 6.19E-14 | 5.61E-12 | 20.5691  |
| PTGIS      | -3.95654 | 2.446102 | -8.07216 | 6.65E-14 | 5.95E-12 | 21.003   |
| SIDT2      | -1.74365 | 5.617597 | -8.07062 | 6.71E-14 | 5.97E-12 | 20.9599  |
| ZHX3       | -1.49737 | 5.391478 | -8.06868 | 6.79E-14 | 6.01E-12 | 20.94513 |
| MYBL2      | 4.103713 | 6.452017 | 8.053307 | 7.47E-14 | 6.56E-12 | 20.98914 |
| DBT        | -1.46791 | 5.224703 | -8.05233 | 7.51E-14 | 6.56E-12 | 20.84681 |
| GTF2IRD2P1 | -1.65795 | 1.853313 | -8.04711 | 7.76E-14 | 6.73E-12 | 20.9606  |
| SECISBP2L  | -1.46712 | 5.629577 | -8.03576 | 8.32E-14 | 7.17E-12 | 20.74691 |
| TMEM220    | -2.01634 | 1.584641 | -8.03246 | 8.49E-14 | 7.28E-12 | 20.87222 |
| BTD        | -1.57031 | 3.437587 | -8.02837 | 8.70E-14 | 7.41E-12 | 20.76556 |
| ITIH5      | -2.8779  | 3.704023 | -8.01836 | 9.25E-14 | 7.84E-12 | 20.65506 |
| ADAMTSL3   | -3.12783 | 1.193229 | -8.0016  | 1.03E-13 | 8.63E-12 | 20.66521 |
| SEMA3E     | -3.88351 | 0.244037 | -7.98159 | 1.16E-13 | 9.70E-12 | 20.56179 |
| KCNK3      | -2.81448 | 0.424888 | -7.96896 | 1.25E-13 | 1.04E-11 | 20.49599 |
| GPRASP1    | -2.08984 | 1.682899 | -7.96543 | 1.28E-13 | 1.04E-11 | 20.4666  |
| JAM2       | -2.39745 | 1.575475 | -7.96653 | 1.27E-13 | 1.04E-11 | 20.46654 |
| PLCL1      | -2.19127 | 1.993781 | -7.96754 | 1.26E-13 | 1.04E-11 | 20.45845 |
| WASF3      | -2.69311 | 2.230995 | -7.9655  | 1.28E-13 | 1.04E-11 | 20.40845 |
| PLK1       | 3.273588 | 5.822849 | 7.960233 | 1.32E-13 | 1.07E-11 | 20.44265 |

|           |          |          |          |          |          |          |
|-----------|----------|----------|----------|----------|----------|----------|
| ITM2A     | -2.33889 | 2.481558 | -7.9454  | 1.45E-13 | 1.16E-11 | 20.28949 |
| PCNA      | 1.81982  | 6.985568 | 7.929687 | 1.59E-13 | 1.27E-11 | 20.14216 |
| ERO1LB    | -2.54704 | 3.680992 | -7.92928 | 1.60E-13 | 1.27E-11 | 20.12438 |
| PBXIP1    | -1.77766 | 6.190789 | -7.91998 | 1.69E-13 | 1.33E-11 | 20.06004 |
| NICN1     | -1.25834 | 2.728694 | -7.91663 | 1.72E-13 | 1.35E-11 | 20.15931 |
| PLN       | -3.34407 | 1.677661 | -7.91302 | 1.76E-13 | 1.38E-11 | 20.0992  |
| UBE2C     | 4.01809  | 5.55308  | 7.910969 | 1.79E-13 | 1.39E-11 | 20.09213 |
| SCNN1B    | -4.17483 | 1.456954 | -7.90605 | 1.84E-13 | 1.42E-11 | 20.04143 |
| RAB27A    | -1.69493 | 4.823795 | -7.90368 | 1.87E-13 | 1.43E-11 | 19.95614 |
| REEP1     | -2.75984 | 1.881815 | -7.89175 | 2.01E-13 | 1.53E-11 | 19.98564 |
| BUB1      | 3.912821 | 5.174111 | 7.882028 | 2.13E-13 | 1.62E-11 | 19.89219 |
| GNAO1     | -2.58686 | 1.990198 | -7.87566 | 2.21E-13 | 1.67E-11 | 19.8913  |
| ITGA9     | -2.71881 | 2.242199 | -7.86031 | 2.43E-13 | 1.83E-11 | 19.77895 |
| GTF2IRD2  | -1.43072 | 3.398486 | -7.85867 | 2.46E-13 | 1.83E-11 | 19.75894 |
| PBLD      | -2.43984 | 2.866105 | -7.85819 | 2.46E-13 | 1.83E-11 | 19.7429  |
| PCBD2     | -1.0863  | 3.673213 | -7.85525 | 2.51E-13 | 1.85E-11 | 19.73886 |
| PRC1      | 2.515768 | 6.046988 | 7.846465 | 2.64E-13 | 1.94E-11 | 19.74851 |
| NUSAP1    | 3.325848 | 5.713013 | 7.83956  | 2.76E-13 | 2.02E-11 | 19.72758 |
| ADCY5     | -3.49423 | 1.577009 | -7.82259 | 3.06E-13 | 2.22E-11 | 19.56085 |
| MCM4      | 2.19665  | 6.818446 | 7.814867 | 3.20E-13 | 2.32E-11 | 19.48649 |
| CILP      | -3.60336 | 0.872856 | -7.81022 | 3.29E-13 | 2.36E-11 | 19.52314 |
| NPR1      | -2.27488 | 1.903606 | -7.80953 | 3.31E-13 | 2.36E-11 | 19.52157 |
| ZBTB47    | -1.56213 | 3.852707 | -7.81093 | 3.28E-13 | 2.36E-11 | 19.44074 |
| KIFC1     | 3.439532 | 4.573026 | 7.8035   | 3.43E-13 | 2.43E-11 | 19.41713 |
| ARHGEF37  | -2.27124 | 4.372336 | -7.80032 | 3.50E-13 | 2.47E-11 | 19.34207 |
| BUB1B     | 3.825576 | 4.982033 | 7.78376  | 3.87E-13 | 2.72E-11 | 19.30988 |
| PRKAA2    | -3.66452 | 1.649519 | -7.77624 | 4.05E-13 | 2.81E-11 | 19.27556 |
| DARC      | -3.5127  | 2.017891 | -7.77671 | 4.04E-13 | 2.81E-11 | 19.2642  |
| HDGF      | 1.201418 | 8.644763 | 7.773396 | 4.12E-13 | 2.85E-11 | 19.18297 |
| PTPN21    | -1.48201 | 4.653985 | -7.7684  | 4.24E-13 | 2.92E-11 | 19.15697 |
| KIF18B    | 3.773454 | 5.013211 | 7.764692 | 4.34E-13 | 2.97E-11 | 19.20964 |
| PPP1R3C   | -3.06777 | 2.1966   | -7.76184 | 4.41E-13 | 3.01E-11 | 19.18336 |
| ZNF415    | -2.59607 | 0.33421  | -7.74477 | 4.89E-13 | 3.32E-11 | 19.17217 |
| ASPM      | 3.745434 | 5.843482 | 7.724637 | 5.53E-13 | 3.73E-11 | 19.04707 |
| FHL1      | -3.47076 | 4.869128 | -7.71436 | 5.88E-13 | 3.95E-11 | 18.8459  |
| ANLN      | 3.15468  | 6.561632 | 7.692329 | 6.71E-13 | 4.49E-11 | 18.84561 |
| TSPYL4    | -1.47026 | 4.89382  | -7.68445 | 7.04E-13 | 4.68E-11 | 18.65523 |
| CKAP2     | 2.4184   | 5.840592 | 7.682007 | 7.14E-13 | 4.73E-11 | 18.78736 |
| PDGFD     | -2.49201 | 2.614505 | -7.67743 | 7.34E-13 | 4.84E-11 | 18.68651 |
| FAM72A    | 3.414793 | 1.043048 | 7.663011 | 8.01E-13 | 5.25E-11 | 18.19686 |
| KIF2C     | 3.541987 | 5.071388 | 7.65837  | 8.23E-13 | 5.37E-11 | 18.62724 |
| FANCA     | 2.929204 | 4.920474 | 7.655712 | 8.36E-13 | 5.44E-11 | 18.64087 |
| F10       | -2.70603 | 0.200748 | -7.65169 | 8.57E-13 | 5.54E-11 | 18.63058 |
| ETFDH     | -1.56647 | 4.302801 | -7.64893 | 8.71E-13 | 5.61E-11 | 18.46153 |
| NCAPG     | 3.256558 | 4.976568 | 7.647121 | 8.81E-13 | 5.64E-11 | 18.57616 |
| CDC20     | 3.829255 | 5.458725 | 7.59848  | 1.18E-12 | 7.50E-11 | 18.29327 |
| CLSPN     | 3.241896 | 4.357834 | 7.598195 | 1.18E-12 | 7.50E-11 | 18.23817 |
| AMT       | -1.93026 | 1.761039 | -7.58869 | 1.25E-12 | 7.86E-11 | 18.25472 |
| DMD       | -2.83957 | 3.777658 | -7.58886 | 1.25E-12 | 7.86E-11 | 18.10193 |
| ZNF132    | -1.58534 | 1.23196  | -7.58725 | 1.26E-12 | 7.90E-11 | 18.2606  |
| PCCA      | -1.62378 | 3.541602 | -7.58483 | 1.28E-12 | 7.97E-11 | 18.12515 |
| DIXDC1    | -1.94911 | 3.784121 | -7.58005 | 1.32E-12 | 8.17E-11 | 18.06823 |
| SNX1      | -0.91944 | 6.500217 | -7.57683 | 1.34E-12 | 8.29E-11 | 18.02142 |
| KANK3     | -1.67164 | 1.963045 | -7.56988 | 1.40E-12 | 8.60E-11 | 18.14605 |
| SGOL1     | 3.34939  | 2.922465 | 7.562385 | 1.46E-12 | 8.96E-11 | 17.75162 |
| APLP1     | -3.24317 | 1.74914  | -7.54887 | 1.58E-12 | 9.67E-11 | 17.955   |
| CIRBP     | -1.27336 | 6.275448 | -7.54787 | 1.59E-12 | 9.68E-11 | 17.85369 |
| ARHGAP11A | 2.592447 | 5.539703 | 7.542213 | 1.65E-12 | 9.97E-11 | 17.99767 |



|          |          |          |          |          |          |          |
|----------|----------|----------|----------|----------|----------|----------|
| PEG3     | -2.53113 | 0.389102 | -7.53938 | 1.68E-12 | 1.01E-10 | 17.98491 |
| C1QTNF3  | -2.29719 | 2.138301 | -7.53265 | 1.74E-12 | 1.05E-10 | 17.8816  |
| CCNA2    | 2.828868 | 5.446181 | 7.528803 | 1.79E-12 | 1.06E-10 | 17.92606 |
| CEP55    | 3.666184 | 5.380406 | 7.528172 | 1.79E-12 | 1.06E-10 | 17.89709 |
| ACO2     | -1.22159 | 7.208849 | -7.52832 | 1.79E-12 | 1.06E-10 | 17.75426 |
| PSCA     | -5.61439 | 2.939733 | -7.52672 | 1.81E-12 | 1.07E-10 | 17.77099 |
| CDC25B   | 2.393874 | 6.86042  | 7.52186  | 1.86E-12 | 1.09E-10 | 17.77425 |
| CBX3     | 1.274507 | 7.114626 | 7.51836  | 1.90E-12 | 1.11E-10 | 17.68611 |
| ITPR1    | -2.21481 | 4.311872 | -7.5025  | 2.09E-12 | 1.22E-10 | 17.59195 |
| KLHDC1   | -1.89081 | 0.932952 | -7.49965 | 2.12E-12 | 1.23E-10 | 17.75701 |
| FAM63A   | -1.73785 | 4.314596 | -7.49584 | 2.17E-12 | 1.25E-10 | 17.5613  |
| SPC25    | 2.906325 | 2.779772 | 7.492409 | 2.22E-12 | 1.27E-10 | 17.42684 |
| TTYH3    | 2.020872 | 7.817271 | 7.486101 | 2.30E-12 | 1.32E-10 | 17.49919 |
| C6orf204 | -1.80054 | 1.21457  | -7.47169 | 2.51E-12 | 1.43E-10 | 17.59872 |
| BCL2L2   | -1.24128 | 5.468194 | -7.47099 | 2.52E-12 | 1.43E-10 | 17.40086 |
| MAP6     | -2.62402 | 0.585598 | -7.46807 | 2.56E-12 | 1.45E-10 | 17.57733 |
| TRIM3    | -1.0118  | 3.2763   | -7.46557 | 2.60E-12 | 1.46E-10 | 17.48703 |
| PDK4     | -4.68167 | 4.167025 | -7.46314 | 2.64E-12 | 1.48E-10 | 17.38978 |
| MELK     | 3.639829 | 4.70613  | 7.45385  | 2.79E-12 | 1.56E-10 | 17.41892 |
| KAT2B    | -1.98964 | 4.516489 | -7.44178 | 2.99E-12 | 1.67E-10 | 17.23795 |
| INPP5A   | -1.22739 | 4.72909  | -7.43388 | 3.13E-12 | 1.74E-10 | 17.20088 |
| IQGAP3   | 3.327666 | 5.877701 | 7.424866 | 3.31E-12 | 1.83E-10 | 17.33116 |
| C4orf34  | -1.47141 | 4.376117 | -7.41056 | 3.60E-12 | 1.98E-10 | 17.07226 |
| NUP62    | 0.949453 | 6.403827 | 7.395203 | 3.94E-12 | 2.16E-10 | 16.98726 |
| FANCI    | 2.112018 | 5.93768  | 7.386997 | 4.13E-12 | 2.26E-10 | 17.0483  |
| FAM54A   | 3.407651 | 2.487915 | 7.378858 | 4.34E-12 | 2.36E-10 | 16.65371 |
| LMNB2    | 1.6888   | 7.144195 | 7.373006 | 4.49E-12 | 2.43E-10 | 16.85746 |
| NEK2     | 4.134901 | 4.246856 | 7.367856 | 4.63E-12 | 2.50E-10 | 16.80448 |
| MND1     | 3.025693 | 1.555837 | 7.363283 | 4.75E-12 | 2.55E-10 | 16.56201 |
| HOXC11   | 5.595484 | 1.072661 | 7.363096 | 4.76E-12 | 2.55E-10 | 16.55794 |
| KIF22    | 1.55926  | 5.70851  | 7.350456 | 5.12E-12 | 2.72E-10 | 16.8127  |
| DDX39    | 1.551763 | 6.026134 | 7.351107 | 5.10E-12 | 2.72E-10 | 16.79086 |
| FAM49B   | 1.501773 | 6.062502 | 7.350179 | 5.13E-12 | 2.72E-10 | 16.7798  |
| C16orf45 | -1.79071 | 2.779471 | -7.34868 | 5.18E-12 | 2.73E-10 | 16.80182 |
| BDH2     | -1.36708 | 3.504205 | -7.34422 | 5.31E-12 | 2.79E-10 | 16.74771 |
| NCAPH    | 3.737163 | 4.470659 | 7.341748 | 5.39E-12 | 2.82E-10 | 16.75358 |
| MAPT     | -2.80726 | 0.358545 | -7.34066 | 5.43E-12 | 2.83E-10 | 16.85234 |
| C1orf175 | -2.45924 | 1.166555 | -7.33679 | 5.55E-12 | 2.88E-10 | 16.81447 |
| FABP3    | -2.35344 | 1.228757 | -7.33221 | 5.70E-12 | 2.94E-10 | 16.78961 |
| GTSE1    | 3.272175 | 4.273412 | 7.331979 | 5.71E-12 | 2.94E-10 | 16.72731 |
| KIF23    | 3.048508 | 5.150806 | 7.320323 | 6.11E-12 | 3.14E-10 | 16.73427 |
| MYOM1    | -2.914   | 1.163445 | -7.3198  | 6.13E-12 | 3.14E-10 | 16.69173 |
| RAD54L   | 3.482722 | 3.454496 | 7.312631 | 6.40E-12 | 3.26E-10 | 16.46747 |
| RAF1     | -0.93363 | 6.585658 | -7.30879 | 6.54E-12 | 3.32E-10 | 16.46989 |
| PIK3C2G  | -4.357   | 0.258888 | -7.30552 | 6.67E-12 | 3.38E-10 | 16.59964 |
| TENC1    | -2.05812 | 5.707047 | -7.29925 | 6.92E-12 | 3.49E-10 | 16.41899 |
| CENPA    | 4.015438 | 3.201527 | 7.295765 | 7.06E-12 | 3.55E-10 | 16.21691 |
| ZMAT1    | -2.69959 | 1.215693 | -7.2796  | 7.76E-12 | 3.89E-10 | 16.47354 |
| HPGD     | -3.86873 | 4.007188 | -7.27338 | 8.05E-12 | 4.02E-10 | 16.28218 |
| RECK     | -1.98223 | 2.535646 | -7.27144 | 8.14E-12 | 4.05E-10 | 16.3679  |
| MAD2L1   | 2.785568 | 4.734406 | 7.267395 | 8.33E-12 | 4.13E-10 | 16.43211 |
| WDR62    | 3.408384 | 4.336663 | 7.261279 | 8.64E-12 | 4.26E-10 | 16.32932 |
| TADA2B   | -1.08173 | 4.851692 | -7.26026 | 8.69E-12 | 4.27E-10 | 16.20245 |
| TIMELESS | 1.920479 | 5.655014 | 7.257839 | 8.81E-12 | 4.32E-10 | 16.31993 |
| LMNB1    | 2.341727 | 5.659295 | 7.246271 | 9.43E-12 | 4.60E-10 | 16.28683 |
| EEF1A2   | -3.60786 | 0.731214 | -7.24183 | 9.67E-12 | 4.71E-10 | 16.24131 |
| ZNF778   | -1.06663 | 2.296107 | -7.23553 | 1.00E-11 | 4.85E-10 | 16.24372 |
| PPP1R12C | -1.20815 | 5.689583 | -7.23607 | 1.00E-11 | 4.85E-10 | 16.04863 |

|            |          |          |          |          |          |          |
|------------|----------|----------|----------|----------|----------|----------|
| SPAG5      | 3.012595 | 5.559124 | 7.2329   | 1.02E-11 | 4.91E-10 | 16.2446  |
| DLGAP5     | 3.873238 | 4.739529 | 7.222731 | 1.08E-11 | 5.19E-10 | 16.11158 |
| ABCA6      | -2.90201 | 0.53556  | -7.22174 | 1.09E-11 | 5.20E-10 | 16.17458 |
| ASF1B      | 3.192327 | 4.857218 | 7.219953 | 1.10E-11 | 5.24E-10 | 16.15665 |
| CDCA8      | 2.904365 | 4.862462 | 7.206392 | 1.19E-11 | 5.65E-10 | 16.09157 |
| ANO5       | -3.29302 | 1.044127 | -7.20103 | 1.23E-11 | 5.81E-10 | 16.00478 |
| TROAP      | 3.598868 | 4.490695 | 7.182667 | 1.36E-11 | 6.44E-10 | 15.89131 |
| RNF14      | -0.89054 | 5.104995 | -7.17032 | 1.47E-11 | 6.89E-10 | 15.68719 |
| KCNMB1     | -2.52326 | 2.463334 | -7.15151 | 1.63E-11 | 7.66E-10 | 15.66141 |
| ME3        | -2.39673 | 1.929221 | -7.14964 | 1.65E-11 | 7.72E-10 | 15.70268 |
| NCRNA00087 | -2.13723 | -0.09024 | -7.12851 | 1.87E-11 | 8.69E-10 | 15.64129 |
| CCNB1      | 2.789015 | 5.586161 | 7.115918 | 2.01E-11 | 9.32E-10 | 15.58293 |
| PPP1R9A    | -3.5482  | 1.504001 | -7.10946 | 2.08E-11 | 9.64E-10 | 15.44115 |
| C11orf67   | -1.29056 | 1.956649 | -7.10885 | 2.09E-11 | 9.64E-10 | 15.5405  |
| UBL3       | -1.95783 | 5.893392 | -7.10591 | 2.13E-11 | 9.77E-10 | 15.32076 |
| LMOD1      | -3.6311  | 4.047446 | -7.1005  | 2.19E-11 | 1.00E-09 | 15.29812 |
| TBC1D14    | -1.39563 | 6.318895 | -7.10089 | 2.19E-11 | 1.00E-09 | 15.29022 |
| CDCA5      | 3.436484 | 4.620919 | 7.095514 | 2.26E-11 | 1.03E-09 | 15.44011 |
| SLIT2      | -3.19597 | 1.249889 | -7.0945  | 2.27E-11 | 1.03E-09 | 15.39327 |
| SLC2A12    | -2.58555 | 3.94594  | -7.0938  | 2.28E-11 | 1.03E-09 | 15.25553 |
| ZNF470     | -2.3629  | 0.808143 | -7.09301 | 2.29E-11 | 1.03E-09 | 15.46068 |
| METTL7A    | -2.8872  | 4.916651 | -7.08788 | 2.36E-11 | 1.06E-09 | 15.2215  |
| SUCLG2     | -1.67892 | 5.195961 | -7.0877  | 2.36E-11 | 1.06E-09 | 15.20931 |
| TACC3      | 2.278384 | 5.755047 | 7.084489 | 2.41E-11 | 1.07E-09 | 15.3643  |
| TAPT1      | -1.03735 | 4.278418 | -7.07571 | 2.53E-11 | 1.13E-09 | 15.18771 |
| MYEF2      | -2.86651 | 1.39365  | -7.07499 | 2.54E-11 | 1.13E-09 | 15.29412 |
| XPO1       | 0.943948 | 8.037493 | 7.074341 | 2.55E-11 | 1.13E-09 | 15.13521 |
| CDC45      | 4.226611 | 3.679566 | 7.071364 | 2.59E-11 | 1.14E-09 | 15.07546 |
| STMN1      | 2.070761 | 6.996222 | 7.068418 | 2.64E-11 | 1.16E-09 | 15.15306 |
| CENPM      | 2.991915 | 2.931629 | 7.067662 | 2.65E-11 | 1.16E-09 | 15.12627 |
| IL11RA     | -1.64845 | 1.678385 | -7.06219 | 2.73E-11 | 1.19E-09 | 15.27898 |
| EXO1       | 3.770993 | 3.782244 | 7.060494 | 2.76E-11 | 1.20E-09 | 15.11146 |
| TK1        | 2.600194 | 6.188269 | 7.058693 | 2.79E-11 | 1.21E-09 | 15.20687 |
| AUH        | -1.05424 | 3.30126  | -7.05813 | 2.80E-11 | 1.21E-09 | 15.16406 |
| NACAD      | -2.23107 | 1.831874 | -7.05584 | 2.84E-11 | 1.22E-09 | 15.19462 |
| RAB4A      | -1.01716 | 5.053484 | -7.05277 | 2.89E-11 | 1.24E-09 | 15.02227 |
| GTF2IRD2B  | -1.59069 | 2.064649 | -7.05092 | 2.92E-11 | 1.25E-09 | 15.19407 |
| CDCA2      | 3.588002 | 3.902676 | 7.050244 | 2.93E-11 | 1.25E-09 | 15.09917 |
| POU6F1     | -1.53266 | 2.323965 | -7.04787 | 2.97E-11 | 1.26E-09 | 15.15912 |
| HMGA1      | 1.900507 | 8.475713 | 7.045972 | 3.00E-11 | 1.27E-09 | 14.97337 |
| PRKAR2B    | -2.33803 | 2.919162 | -7.04353 | 3.04E-11 | 1.29E-09 | 15.03084 |
| FYCO1      | -1.59627 | 5.937112 | -7.04247 | 3.06E-11 | 1.29E-09 | 14.95935 |
| STIL       | 2.973604 | 4.86692  | 7.038983 | 3.12E-11 | 1.31E-09 | 15.16361 |
| ZFP28      | -2.36275 | 0.720925 | -7.03857 | 3.13E-11 | 1.31E-09 | 15.1613  |
| FLJ33630   | -1.15658 | 4.053593 | -7.03648 | 3.17E-11 | 1.33E-09 | 14.97631 |
| ZNF542     | -2.08636 | 1.784568 | -7.0315  | 3.26E-11 | 1.36E-09 | 15.07361 |
| SYNE1      | -2.70804 | 4.628095 | -7.02036 | 3.48E-11 | 1.45E-09 | 14.83809 |
| ZNF844     | -2.40967 | 1.439436 | -7.01779 | 3.53E-11 | 1.46E-09 | 15.00338 |
| TMEM47     | -2.26143 | 4.082318 | -7.00659 | 3.76E-11 | 1.56E-09 | 14.76619 |
| HCFC2      | -1.11998 | 4.098038 | -6.99988 | 3.91E-11 | 1.61E-09 | 14.77023 |
| ANKDD1A    | -1.56382 | 1.681038 | -6.99701 | 3.97E-11 | 1.63E-09 | 14.92113 |
| FOXN3      | -1.40573 | 6.804289 | -6.99498 | 4.02E-11 | 1.65E-09 | 14.70426 |
| AOC3       | -2.64595 | 3.928292 | -6.99204 | 4.09E-11 | 1.67E-09 | 14.68426 |
| DKC1       | 1.259113 | 6.50976  | 6.984802 | 4.26E-11 | 1.74E-09 | 14.66766 |
| UBE2T      | 3.196338 | 4.132956 | 6.981039 | 4.35E-11 | 1.77E-09 | 14.79502 |
| LDHD       | -2.49824 | 2.117042 | -6.97689 | 4.46E-11 | 1.81E-09 | 14.71364 |
| PINK1      | -1.3064  | 5.717773 | -6.97121 | 4.60E-11 | 1.86E-09 | 14.55543 |
| CNN1       | -3.71851 | 4.107543 | -6.96364 | 4.81E-11 | 1.94E-09 | 14.53232 |

|          |          |          |          |          |          |          |
|----------|----------|----------|----------|----------|----------|----------|
| PRELP    | -3.2132  | 3.654371 | -6.95335 | 5.10E-11 | 2.05E-09 | 14.47195 |
| PRICKLE2 | -2.22255 | 4.073782 | -6.9462  | 5.31E-11 | 2.13E-09 | 14.43032 |
| ATPAF1   | -0.87666 | 5.431573 | -6.94238 | 5.43E-11 | 2.17E-09 | 14.39829 |
| CKS2     | 2.685121 | 5.057604 | 6.939247 | 5.52E-11 | 2.20E-09 | 14.61859 |
| KCNAB1   | -1.5455  | 1.070119 | -6.934   | 5.69E-11 | 2.25E-09 | 14.59153 |
| TPCN2    | -1.98187 | 4.630079 | -6.9342  | 5.68E-11 | 2.25E-09 | 14.35407 |
| PTPRN2   | -3.28995 | 2.678551 | -6.92764 | 5.90E-11 | 2.33E-09 | 14.3629  |
| CKS1B    | 2.078253 | 5.467041 | 6.925924 | 5.96E-11 | 2.35E-09 | 14.49245 |
| TCEB3    | -0.95545 | 6.424295 | -6.91961 | 6.18E-11 | 2.42E-09 | 14.27141 |
| KIAA0141 | -0.95688 | 5.136717 | -6.90805 | 6.60E-11 | 2.58E-09 | 14.21346 |
| KLF9     | -2.37651 | 5.614106 | -6.90357 | 6.76E-11 | 2.64E-09 | 14.19194 |
| FAM114A2 | -0.88637 | 3.962798 | -6.90161 | 6.84E-11 | 2.66E-09 | 14.24836 |
| KIAA0494 | -1.10247 | 7.565856 | -6.90153 | 6.84E-11 | 2.66E-09 | 14.19509 |
| TUBB     | 1.206298 | 9.877496 | 6.899244 | 6.93E-11 | 2.68E-09 | 14.18839 |
| MCM2     | 2.650072 | 6.298074 | 6.898035 | 6.98E-11 | 2.69E-09 | 14.30977 |
| CRBN     | -0.94724 | 4.185969 | -6.89466 | 7.12E-11 | 2.74E-09 | 14.1892  |
| KIAA0101 | 3.365246 | 4.805594 | 6.889007 | 7.35E-11 | 2.81E-09 | 14.33204 |
| RGAG4    | -2.06308 | 1.530836 | -6.88947 | 7.33E-11 | 2.81E-09 | 14.3108  |
| SORBS1   | -3.506   | 5.395496 | -6.88597 | 7.47E-11 | 2.85E-09 | 14.11312 |
| BRP44L   | -1.50282 | 4.41832  | -6.87066 | 8.15E-11 | 3.10E-09 | 14.01707 |
| KIF4A    | 3.692852 | 4.709366 | 6.86793  | 8.28E-11 | 3.14E-09 | 14.19508 |
| PDZD4    | -2.61577 | 0.555043 | -6.86698 | 8.32E-11 | 3.15E-09 | 14.21666 |
| KIAA0430 | -0.94078 | 6.67804  | -6.86525 | 8.40E-11 | 3.17E-09 | 13.97357 |
| NBEA     | -2.75983 | 1.711062 | -6.86135 | 8.59E-11 | 3.23E-09 | 14.08849 |
| BCKDHB   | -1.48636 | 4.015193 | -6.86108 | 8.60E-11 | 3.23E-09 | 13.98615 |
| TCEAL3   | -1.61587 | 3.08368  | -6.85871 | 8.72E-11 | 3.27E-09 | 14.03429 |
| ORC1L    | 3.715461 | 3.511776 | 6.855301 | 8.89E-11 | 3.32E-09 | 13.98592 |
| LAMA2    | -2.63353 | 3.844479 | -6.85102 | 9.11E-11 | 3.39E-09 | 13.90365 |
| UPRT     | -1.31541 | 2.872937 | -6.83936 | 9.73E-11 | 3.61E-09 | 13.97191 |
| PHF17    | -1.84202 | 4.947135 | -6.83245 | 1.01E-10 | 3.75E-09 | 13.78818 |
| SNRPB    | 1.235008 | 7.72654  | 6.829858 | 1.03E-10 | 3.79E-09 | 13.77071 |
| KNTC1    | 1.76097  | 5.70482  | 6.828207 | 1.04E-10 | 3.82E-09 | 13.90135 |
| SCUBE1   | -3.13875 | 0.493093 | -6.82737 | 1.04E-10 | 3.83E-09 | 13.98004 |
| MYST4    | -1.06424 | 5.758233 | -6.81995 | 1.09E-10 | 3.98E-09 | 13.71604 |
| NEXN     | -2.29828 | 3.753443 | -6.81771 | 1.10E-10 | 4.02E-09 | 13.72959 |
| TOR1AIP1 | -0.96447 | 6.165674 | -6.81512 | 1.12E-10 | 4.07E-09 | 13.69108 |
| EIF4E3   | -1.64896 | 4.533388 | -6.81078 | 1.14E-10 | 4.16E-09 | 13.67864 |
| ACER2    | -2.16808 | 2.658422 | -6.80811 | 1.16E-10 | 4.21E-09 | 13.75914 |
| ASAP3    | -1.80443 | 4.22269  | -6.803   | 1.19E-10 | 4.32E-09 | 13.64289 |
| UHRF1    | 3.181726 | 4.308303 | 6.800424 | 1.21E-10 | 4.37E-09 | 13.83918 |
| SOBP     | -2.08324 | 2.676914 | -6.7988  | 1.22E-10 | 4.40E-09 | 13.70902 |
| MOAP1    | -1.10013 | 4.457246 | -6.7965  | 1.24E-10 | 4.45E-09 | 13.62246 |
| XYLT2    | -1.51831 | 5.386482 | -6.79576 | 1.24E-10 | 4.45E-09 | 13.58451 |
| CCNF     | 2.337838 | 4.909363 | 6.794296 | 1.25E-10 | 4.48E-09 | 13.82499 |
| GIN1     | -0.78533 | 2.212451 | -6.79269 | 1.27E-10 | 4.51E-09 | 13.81098 |
| HADHB    | -0.85945 | 6.357314 | -6.79113 | 1.28E-10 | 4.54E-09 | 13.56013 |
| PDE1A    | -2.23351 | 0.713777 | -6.77883 | 1.37E-10 | 4.85E-09 | 13.74519 |
| HN1      | 1.665504 | 6.685825 | 6.770049 | 1.44E-10 | 5.08E-09 | 13.49368 |
| ZNF467   | -1.68843 | 2.614499 | -6.76553 | 1.47E-10 | 5.20E-09 | 13.56269 |
| LMF1     | -1.43515 | 3.066296 | -6.76412 | 1.49E-10 | 5.23E-09 | 13.531   |
| ID4      | -2.10046 | 3.109464 | -6.75777 | 1.54E-10 | 5.40E-09 | 13.4491  |
| NFIC     | -1.59213 | 6.50286  | -6.75682 | 1.55E-10 | 5.42E-09 | 13.38491 |
| SPRYD3   | -1.01536 | 5.813396 | -6.75449 | 1.57E-10 | 5.48E-09 | 13.3567  |
| CENPI    | 3.090932 | 2.381406 | 6.747384 | 1.63E-10 | 5.68E-09 | 13.32495 |
| MOSC2    | -1.8777  | 2.513092 | -6.74226 | 1.68E-10 | 5.83E-09 | 13.43092 |
| RACGAP1  | 1.682012 | 5.922938 | 6.741878 | 1.68E-10 | 5.83E-09 | 13.39988 |
| KCNIP4   | -1.37    | -0.01685 | -6.72772 | 1.82E-10 | 6.27E-09 | 13.43688 |
| YPEL1    | -1.66255 | 1.883401 | -6.72843 | 1.81E-10 | 6.27E-09 | 13.43337 |

|           |          |          |          |          |          |          |
|-----------|----------|----------|----------|----------|----------|----------|
| PTBP1     | 0.722642 | 8.701353 | 6.727759 | 1.82E-10 | 6.27E-09 | 13.22846 |
| PRKACB    | -2.07102 | 5.208868 | -6.7212  | 1.89E-10 | 6.48E-09 | 13.18051 |
| BZRAP1    | -2.2261  | 2.352936 | -6.71748 | 1.93E-10 | 6.60E-09 | 13.28393 |
| CCNB2     | 3.878556 | 5.114535 | 6.714306 | 1.96E-10 | 6.69E-09 | 13.38903 |
| GPD1L     | -1.86559 | 5.080288 | -6.71417 | 1.96E-10 | 6.69E-09 | 13.13967 |
| TOX       | -2.41167 | 2.452769 | -6.70921 | 2.02E-10 | 6.86E-09 | 13.2195  |
| CLN8      | -1.24038 | 4.199136 | -6.69826 | 2.15E-10 | 7.28E-09 | 13.09485 |
| NUF2      | 3.916921 | 3.94976  | 6.697713 | 2.15E-10 | 7.28E-09 | 13.19636 |
| CYFIP2    | -2.57237 | 4.087019 | -6.69474 | 2.19E-10 | 7.39E-09 | 13.04226 |
| NR3C2     | -2.76706 | 2.275638 | -6.68426 | 2.32E-10 | 7.79E-09 | 13.07779 |
| SFRP1     | -3.70393 | 2.29494  | -6.68468 | 2.31E-10 | 7.79E-09 | 13.03581 |
| PLK4      | 2.536927 | 4.146588 | 6.683783 | 2.33E-10 | 7.79E-09 | 13.23731 |
| FAM172A   | -1.14299 | 4.546845 | -6.68205 | 2.35E-10 | 7.85E-09 | 12.99072 |
| DGKD      | -2.14564 | 5.429524 | -6.67825 | 2.40E-10 | 8.00E-09 | 12.94966 |
| FANCB     | 2.37861  | 1.350041 | 6.676344 | 2.42E-10 | 8.07E-09 | 12.94073 |
| KIF18A    | 3.252482 | 3.91151  | 6.670941 | 2.50E-10 | 8.29E-09 | 13.1193  |
| DEPDC1    | 3.39244  | 4.623198 | 6.669259 | 2.52E-10 | 8.35E-09 | 13.14918 |
| GADD45B   | -1.97955 | 4.442689 | -6.66742 | 2.55E-10 | 8.42E-09 | 12.89208 |
| PTTG1     | 3.27229  | 4.860945 | 6.664063 | 2.60E-10 | 8.51E-09 | 13.13354 |
| DEAF1     | -1.02069 | 4.636438 | -6.66409 | 2.60E-10 | 8.51E-09 | 12.89421 |
| FBXL5     | -0.97809 | 6.27484  | -6.66452 | 2.59E-10 | 8.51E-09 | 12.86959 |
| STK32B    | -2.37136 | 0.432443 | -6.66073 | 2.64E-10 | 8.63E-09 | 13.11586 |
| THRB      | -2.49117 | 3.664539 | -6.66096 | 2.64E-10 | 8.63E-09 | 12.87315 |
| TCP11L2   | -1.50794 | 3.614181 | -6.64629 | 2.87E-10 | 9.33E-09 | 12.83981 |
| GABRB3    | -3.61158 | 0.69989  | -6.64501 | 2.89E-10 | 9.38E-09 | 12.94626 |
| PECI      | -1.58032 | 4.370622 | -6.64119 | 2.95E-10 | 9.55E-09 | 12.76161 |
| SKA3      | 3.457612 | 4.00142  | 6.63849  | 2.99E-10 | 9.68E-09 | 12.94009 |
| KIF14     | 3.849683 | 4.392965 | 6.637893 | 3.00E-10 | 9.69E-09 | 12.93958 |
| DCLK1     | -2.58837 | 1.161363 | -6.63515 | 3.05E-10 | 9.81E-09 | 12.92502 |
| PMM1      | -1.27303 | 3.871144 | -6.63267 | 3.09E-10 | 9.92E-09 | 12.76085 |
| PLA2G12A  | -0.96935 | 4.893961 | -6.62836 | 3.16E-10 | 1.01E-08 | 12.69032 |
| KCNMA1    | -3.26518 | 3.314068 | -6.6255  | 3.22E-10 | 1.03E-08 | 12.68112 |
| GARNL3    | -1.64043 | 1.238836 | -6.61858 | 3.34E-10 | 1.07E-08 | 12.88554 |
| HJURP     | 3.552149 | 4.299318 | 6.615212 | 3.40E-10 | 1.08E-08 | 12.83629 |
| SKA1      | 3.245746 | 3.192212 | 6.613103 | 3.44E-10 | 1.09E-08 | 12.74005 |
| RAD51     | 2.975336 | 3.404591 | 6.612272 | 3.46E-10 | 1.09E-08 | 12.78907 |
| SGSM2     | -1.16745 | 5.546744 | -6.61233 | 3.46E-10 | 1.09E-08 | 12.5848  |
| BLM       | 2.855188 | 3.904351 | 6.606672 | 3.57E-10 | 1.13E-08 | 12.80823 |
| ESPL1     | 3.16781  | 5.313924 | 6.60188  | 3.66E-10 | 1.15E-08 | 12.80435 |
| PDCD4     | -1.64198 | 6.225555 | -6.60022 | 3.70E-10 | 1.16E-08 | 12.5304  |
| CSRNP1    | -1.79595 | 5.254562 | -6.59557 | 3.79E-10 | 1.19E-08 | 12.49679 |
| SHCBP1    | 2.877958 | 3.91588  | 6.590204 | 3.91E-10 | 1.22E-08 | 12.7223  |
| ARHGAP10  | -1.58035 | 4.002889 | -6.58334 | 4.06E-10 | 1.27E-08 | 12.46846 |
| CAPN6     | -3.67685 | 0.785853 | -6.58029 | 4.13E-10 | 1.28E-08 | 12.58686 |
| FHL5      | -2.29005 | 0.143419 | -6.57805 | 4.18E-10 | 1.30E-08 | 12.68135 |
| NME1      | 1.71377  | 6.003288 | 6.567059 | 4.44E-10 | 1.38E-08 | 12.45049 |
| CCNI      | -1.09904 | 7.611112 | -6.56654 | 4.45E-10 | 1.38E-08 | 12.3681  |
| CKAP2L    | 3.37244  | 4.032537 | 6.565302 | 4.48E-10 | 1.38E-08 | 12.56923 |
| DNMT1     | 1.272777 | 6.842358 | 6.565513 | 4.48E-10 | 1.38E-08 | 12.3545  |
| CALCOCO1  | -1.33046 | 5.65452  | -6.56072 | 4.60E-10 | 1.41E-08 | 12.3074  |
| TSPYL2    | -1.46148 | 3.787485 | -6.55899 | 4.64E-10 | 1.42E-08 | 12.35857 |
| PAICS     | 1.327965 | 7.174829 | 6.557568 | 4.68E-10 | 1.43E-08 | 12.30102 |
| SOCS2     | -1.7724  | 3.415735 | -6.55343 | 4.79E-10 | 1.46E-08 | 12.34008 |
| CCDC150   | 2.829959 | 1.285976 | 6.550063 | 4.88E-10 | 1.48E-08 | 12.29811 |
| CD36      | -2.4268  | 3.149486 | -6.54669 | 4.97E-10 | 1.51E-08 | 12.28851 |
| ZNF568    | -2.33489 | 0.256965 | -6.54446 | 5.03E-10 | 1.52E-08 | 12.50317 |
| C17orf103 | -1.38284 | 3.698926 | -6.54447 | 5.03E-10 | 1.52E-08 | 12.29284 |
| USP53     | -1.48089 | 5.712629 | -6.54315 | 5.06E-10 | 1.53E-08 | 12.21492 |

|          |          |          |          |          |          |          |
|----------|----------|----------|----------|----------|----------|----------|
| BIRC5    | 3.732804 | 4.333232 | 6.539512 | 5.17E-10 | 1.56E-08 | 12.43275 |
| RCC1     | 2.929169 | 4.918396 | 6.537082 | 5.24E-10 | 1.57E-08 | 12.46488 |
| LIG1     | 1.521091 | 5.062743 | 6.535501 | 5.28E-10 | 1.58E-08 | 12.36574 |
| ZFYVE20  | -0.93139 | 5.122391 | -6.53391 | 5.33E-10 | 1.59E-08 | 12.17466 |
| ACADS    | -1.4075  | 4.141731 | -6.52729 | 5.53E-10 | 1.65E-08 | 12.16848 |
| OIP5     | 3.131777 | 2.607881 | 6.517323 | 5.84E-10 | 1.74E-08 | 12.18037 |
| DTL      | 3.192302 | 4.785664 | 6.515224 | 5.90E-10 | 1.75E-08 | 12.35009 |
| EME1     | 2.446039 | 2.262314 | 6.514497 | 5.93E-10 | 1.76E-08 | 12.20797 |
| RECQL4   | 2.758252 | 4.908816 | 6.513494 | 5.96E-10 | 1.76E-08 | 12.33867 |
| AURKA    | 2.621306 | 5.005835 | 6.508217 | 6.13E-10 | 1.81E-08 | 12.30449 |
| DEPDC6   | -2.61237 | 3.492108 | -6.5033  | 6.30E-10 | 1.86E-08 | 12.03023 |
| WIPF3    | -2.48862 | 0.538933 | -6.50105 | 6.38E-10 | 1.88E-08 | 12.26307 |
| LY6E     | 2.06983  | 8.062714 | 6.497142 | 6.52E-10 | 1.91E-08 | 11.97321 |
| INMT     | -2.13396 | 1.465969 | -6.49673 | 6.53E-10 | 1.91E-08 | 12.19428 |
| CENPK    | 2.640864 | 3.06698  | 6.495139 | 6.59E-10 | 1.93E-08 | 12.18109 |
| SCNN1G   | -3.5937  | 0.190309 | -6.49095 | 6.74E-10 | 1.97E-08 | 12.17253 |
| AURKB    | 4.003625 | 4.198897 | 6.488472 | 6.83E-10 | 1.99E-08 | 12.13512 |
| GSG2     | 2.509203 | 3.185749 | 6.484425 | 6.99E-10 | 2.03E-08 | 12.14652 |
| CCDC149  | -1.61685 | 3.311077 | -6.48375 | 7.01E-10 | 2.03E-08 | 11.98627 |
| CDT1     | 3.191902 | 4.8647   | 6.482575 | 7.06E-10 | 2.04E-08 | 12.18039 |
| NTN4     | -2.11942 | 4.192474 | -6.48211 | 7.08E-10 | 2.04E-08 | 11.90017 |
| AK3      | -1.10843 | 6.488214 | -6.47859 | 7.21E-10 | 2.08E-08 | 11.87442 |
| RGNEF    | -1.68084 | 4.746946 | -6.47337 | 7.42E-10 | 2.13E-08 | 11.84643 |
| CBFB     | 1.194328 | 6.023648 | 6.472376 | 7.46E-10 | 2.14E-08 | 11.90326 |
| MOCS1    | -1.45929 | 3.257829 | -6.4718  | 7.49E-10 | 2.14E-08 | 11.93767 |
| SLC25A26 | -0.76818 | 3.499911 | -6.45676 | 8.13E-10 | 2.32E-08 | 11.89042 |
| MCM10    | 3.948524 | 3.672342 | 6.456074 | 8.16E-10 | 2.33E-08 | 11.91552 |
| KIF20A   | 3.731985 | 4.968872 | 6.453887 | 8.25E-10 | 2.35E-08 | 12.02421 |
| NRTN     | -1.80139 | 0.792519 | -6.45211 | 8.34E-10 | 2.36E-08 | 12.01798 |
| CCDC107  | -1.30255 | 3.614794 | -6.45231 | 8.33E-10 | 2.36E-08 | 11.81477 |
| ACADM    | -1.20522 | 5.224469 | -6.44558 | 8.64E-10 | 2.44E-08 | 11.69543 |
| PSMB2    | 0.940827 | 7.208367 | 6.44506  | 8.66E-10 | 2.44E-08 | 11.69069 |
| PRDM16   | -3.02984 | 2.024438 | -6.42976 | 9.41E-10 | 2.65E-08 | 11.72109 |
| SGOL2    | 2.302471 | 4.068932 | 6.428923 | 9.46E-10 | 2.66E-08 | 11.90149 |
| HBB      | -2.73215 | 2.237015 | -6.42595 | 9.61E-10 | 2.70E-08 | 11.70081 |
| MFAP5    | -3.31456 | 2.385945 | -6.42399 | 9.71E-10 | 2.71E-08 | 11.64692 |
| TSC22D3  | -2.26717 | 6.107057 | -6.42403 | 9.71E-10 | 2.71E-08 | 11.59859 |
| CA5B     | -1.19597 | 3.131465 | -6.42291 | 9.77E-10 | 2.72E-08 | 11.71195 |
| CHEK2    | 1.875606 | 3.284988 | 6.419658 | 9.95E-10 | 2.77E-08 | 11.84853 |
| PPM1K    | -1.4716  | 3.286265 | -6.41725 | 1.01E-09 | 2.80E-08 | 11.64474 |
| CENPE    | 2.643913 | 5.128702 | 6.413367 | 1.03E-09 | 2.85E-08 | 11.80296 |
| SYNPO2   | -4.27676 | 5.228081 | -6.413   | 1.03E-09 | 2.85E-08 | 11.56734 |
| POLQ     | 3.286738 | 4.413241 | 6.393005 | 1.15E-09 | 3.17E-08 | 11.70591 |
| KIF15    | 3.265608 | 3.836629 | 6.392707 | 1.15E-09 | 3.17E-08 | 11.67394 |
| CDCA3    | 2.851495 | 3.902062 | 6.387322 | 1.19E-09 | 3.26E-08 | 11.67233 |
| TGFBR3   | -2.61591 | 4.446645 | -6.37575 | 1.26E-09 | 3.46E-08 | 11.33    |
| C1orf112 | 1.632386 | 3.618499 | 6.373979 | 1.27E-09 | 3.49E-08 | 11.61602 |
| C14orf37 | -1.82218 | 1.444735 | -6.36006 | 1.37E-09 | 3.76E-08 | 11.50251 |
| SLC26A9  | -3.70888 | 1.892828 | -6.35632 | 1.40E-09 | 3.82E-08 | 11.30949 |
| TAP2     | 1.452235 | 6.669932 | 6.355643 | 1.41E-09 | 3.83E-08 | 11.25781 |
| CACNB2   | -2.11591 | 1.152394 | -6.3463  | 1.48E-09 | 4.02E-08 | 11.43292 |
| GINS1    | 2.806403 | 4.369379 | 6.342486 | 1.51E-09 | 4.10E-08 | 11.45495 |
| ALG3     | 1.38023  | 6.567583 | 6.340922 | 1.52E-09 | 4.12E-08 | 11.18275 |
| TMEM191A | 2.349173 | -0.02364 | 6.339833 | 1.53E-09 | 4.14E-08 | 11.2367  |
| SLC4A4   | -3.55548 | 1.818704 | -6.3364  | 1.56E-09 | 4.21E-08 | 11.21661 |
| FEN1     | 1.782474 | 5.319932 | 6.334777 | 1.57E-09 | 4.24E-08 | 11.30523 |
| SRPX     | -2.1411  | 2.692468 | -6.33443 | 1.58E-09 | 4.24E-08 | 11.21688 |
| PXK      | -0.95567 | 3.205478 | -6.31582 | 1.74E-09 | 4.68E-08 | 11.16506 |

|           |          |          |          |          |          |          |
|-----------|----------|----------|----------|----------|----------|----------|
| APBB1     | -1.84102 | 2.975854 | -6.31386 | 1.76E-09 | 4.72E-08 | 11.10293 |
| TRAIP     | 1.998977 | 2.100225 | 6.31181  | 1.78E-09 | 4.76E-08 | 11.21396 |
| VAMP2     | -1.25829 | 5.611041 | -6.30835 | 1.81E-09 | 4.84E-08 | 10.9681  |
| KIAA0495  | -1.7386  | 3.054032 | -6.30704 | 1.83E-09 | 4.86E-08 | 11.0678  |
| FZD4      | -1.8467  | 4.395712 | -6.30587 | 1.84E-09 | 4.89E-08 | 10.96848 |
| FAM110B   | -2.03368 | 1.092955 | -6.3044  | 1.85E-09 | 4.91E-08 | 11.22705 |
| CAMTA2    | -0.86988 | 5.996261 | -6.30045 | 1.89E-09 | 5.01E-08 | 10.92583 |
| LOC728264 | -2.33043 | 3.094305 | -6.29998 | 1.90E-09 | 5.01E-08 | 10.99065 |
| GLUL      | -2.29368 | 8.777403 | -6.29604 | 1.94E-09 | 5.11E-08 | 10.98992 |
| XPA       | -1.06643 | 3.382934 | -6.29405 | 1.96E-09 | 5.16E-08 | 11.02149 |
| ORC6L     | 2.601734 | 3.35712  | 6.292485 | 1.98E-09 | 5.18E-08 | 11.17432 |
| ERH       | 0.983176 | 5.828299 | 6.292544 | 1.98E-09 | 5.18E-08 | 10.95586 |
| PSMA7     | 0.92835  | 7.1122   | 6.288915 | 2.01E-09 | 5.27E-08 | 10.86952 |
| SMAD9     | -2.31518 | 1.235278 | -6.2872  | 2.03E-09 | 5.31E-08 | 11.10553 |
| PBK       | 3.281711 | 4.264294 | 6.286058 | 2.05E-09 | 5.32E-08 | 11.15487 |
| ARHGAP11B | 2.225013 | 1.632679 | 6.286133 | 2.04E-09 | 5.32E-08 | 11.00116 |
| CASC5     | 3.116586 | 4.759681 | 6.28344  | 2.07E-09 | 5.39E-08 | 11.15281 |
| C16orf59  | 2.98365  | 2.301533 | 6.280721 | 2.11E-09 | 5.46E-08 | 10.97208 |
| P2RX1     | -2.46637 | 0.244627 | -6.26902 | 2.24E-09 | 5.79E-08 | 11.06996 |
| DTNA      | -2.53738 | 1.855547 | -6.26935 | 2.24E-09 | 5.79E-08 | 10.92455 |
| CDKN3     | 3.055541 | 3.629822 | 6.267194 | 2.26E-09 | 5.83E-08 | 11.03811 |
| C17orf53  | 2.729287 | 3.080118 | 6.266811 | 2.27E-09 | 5.83E-08 | 11.01836 |
| RAE1      | 1.036278 | 5.514293 | 6.266492 | 2.27E-09 | 5.83E-08 | 10.85061 |
| FAM72D    | 3.09989  | 2.666181 | 6.264492 | 2.30E-09 | 5.89E-08 | 10.92737 |
| ADRM1     | 0.948918 | 6.914297 | 6.257961 | 2.38E-09 | 6.08E-08 | 10.71319 |
| HERC1     | -1.00959 | 6.290616 | -6.25708 | 2.39E-09 | 6.10E-08 | 10.70348 |
| FAM72B    | 3.067953 | 3.554194 | 6.253204 | 2.44E-09 | 6.22E-08 | 10.96187 |
| ABL1      | -1.02967 | 7.183162 | -6.25244 | 2.45E-09 | 6.23E-08 | 10.69528 |
| EZH2      | 2.027895 | 4.506772 | 6.245441 | 2.54E-09 | 6.46E-08 | 10.9371  |
| ZNF737    | -2.31481 | 1.681133 | -6.24386 | 2.56E-09 | 6.50E-08 | 10.8352  |
| KIAA1908  | -1.53627 | 1.693325 | -6.24253 | 2.58E-09 | 6.54E-08 | 10.89596 |
| NEIL3     | 3.481028 | 1.949365 | 6.241886 | 2.59E-09 | 6.55E-08 | 10.76633 |
| SNRPN     | -2.14123 | 3.857848 | -6.23941 | 2.63E-09 | 6.62E-08 | 10.63547 |
| MCM7      | 1.690849 | 7.06848  | 6.237968 | 2.65E-09 | 6.66E-08 | 10.63281 |
| NUCB2     | -1.4216  | 5.290639 | -6.23626 | 2.67E-09 | 6.71E-08 | 10.59316 |
| ACTL6A    | 1.441924 | 6.142215 | 6.230829 | 2.75E-09 | 6.89E-08 | 10.6441  |
| BBS1      | -0.95795 | 4.809187 | -6.22427 | 2.85E-09 | 7.13E-08 | 10.55408 |
| FBXW11    | -0.90692 | 5.572133 | -6.22098 | 2.90E-09 | 7.24E-08 | 10.51414 |
| KIF1C     | -1.24905 | 7.452336 | -6.21847 | 2.94E-09 | 7.32E-08 | 10.53042 |
| POLD1     | 1.453568 | 5.141877 | 6.205942 | 3.14E-09 | 7.82E-08 | 10.62266 |
| ZNF229    | -2.65493 | 0.186057 | -6.20487 | 3.16E-09 | 7.83E-08 | 10.73805 |
| GMPR      | -2.18028 | 1.483173 | -6.20514 | 3.15E-09 | 7.83E-08 | 10.67223 |
| KLHDC2    | -0.8752  | 5.217715 | -6.20199 | 3.20E-09 | 7.94E-08 | 10.42471 |
| C12orf48  | 2.39119  | 3.684297 | 6.196703 | 3.30E-09 | 8.15E-08 | 10.71017 |
| CYP1B1    | -2.65623 | 3.018652 | -6.19609 | 3.31E-09 | 8.16E-08 | 10.44042 |
| HNRNPL    | 0.5724   | 7.41696  | 6.188597 | 3.44E-09 | 8.48E-08 | 10.34441 |
| ZWILCH    | 1.532903 | 5.058733 | 6.187144 | 3.47E-09 | 8.52E-08 | 10.54577 |
| SMC4      | 1.366663 | 7.456772 | 6.187024 | 3.47E-09 | 8.52E-08 | 10.3418  |
| HMMR      | 3.214927 | 4.570091 | 6.184453 | 3.52E-09 | 8.62E-08 | 10.64995 |
| CTSF      | -2.04192 | 3.463788 | -6.17802 | 3.64E-09 | 8.91E-08 | 10.34555 |
| ZNF528    | -2.06467 | 1.809445 | -6.17504 | 3.70E-09 | 9.03E-08 | 10.48999 |
| SLMAP     | -1.1692  | 6.349204 | -6.1724  | 3.75E-09 | 9.14E-08 | 10.26742 |
| SGSM3     | -1.14366 | 5.670063 | -6.17164 | 3.77E-09 | 9.17E-08 | 10.25705 |
| FBXO9     | -0.93779 | 5.389684 | -6.16976 | 3.80E-09 | 9.24E-08 | 10.25214 |
| C17orf91  | -1.42825 | 3.0467   | -6.16858 | 3.83E-09 | 9.28E-08 | 10.37596 |
| PGCP      | -1.69784 | 3.63197  | -6.16732 | 3.85E-09 | 9.33E-08 | 10.29749 |
| PKMYT1    | 3.858548 | 4.784764 | 6.162971 | 3.94E-09 | 9.53E-08 | 10.53442 |
| TTK       | 2.736253 | 4.542318 | 6.159466 | 4.02E-09 | 9.69E-08 | 10.52218 |

|           |          |          |          |          |          |          |
|-----------|----------|----------|----------|----------|----------|----------|
| GABARAPL1 | -1.56335 | 5.296484 | -6.15913 | 4.02E-09 | 9.69E-08 | 10.1941  |
| SF3B4     | 0.898091 | 7.107214 | 6.156054 | 4.09E-09 | 9.83E-08 | 10.17975 |
| PARD3B    | -2.06683 | 2.07262  | -6.15299 | 4.16E-09 | 9.98E-08 | 10.347   |
| FKBP5     | -2.42104 | 6.460187 | -6.1505  | 4.21E-09 | 1.01E-07 | 10.18196 |
| TMC6      | 1.535854 | 5.715402 | 6.149469 | 4.23E-09 | 1.01E-07 | 10.27242 |
| EIF2C4    | -1.02623 | 4.289567 | -6.14165 | 4.41E-09 | 1.05E-07 | 10.156   |
| AKD1      | -1.41375 | 2.057766 | -6.13251 | 4.63E-09 | 1.10E-07 | 10.30863 |
| ZWINT     | 2.214235 | 5.03063  | 6.127922 | 4.75E-09 | 1.13E-07 | 10.31303 |
| TDO2      | 4.276072 | 1.331983 | 6.125294 | 4.81E-09 | 1.14E-07 | 10.19526 |
| CXCL12    | -2.30459 | 3.894649 | -6.12498 | 4.82E-09 | 1.14E-07 | 10.03867 |
| TUBA1B    | 1.05904  | 9.762493 | 6.120528 | 4.93E-09 | 1.17E-07 | 10.032   |
| WDR67     | 1.775688 | 3.746117 | 6.111452 | 5.18E-09 | 1.22E-07 | 10.27803 |
| GSN       | -1.82105 | 8.57123  | -6.10723 | 5.29E-09 | 1.25E-07 | 9.998521 |
| C22orf39  | -0.97174 | 4.147471 | -6.09365 | 5.68E-09 | 1.34E-07 | 9.924723 |
| PDZRN3    | -2.28538 | 3.803227 | -6.09079 | 5.77E-09 | 1.36E-07 | 9.867729 |
| RUVBL1    | 1.486317 | 5.526919 | 6.089744 | 5.80E-09 | 1.36E-07 | 9.982642 |
| REC8      | -1.65654 | 2.559406 | -6.08897 | 5.83E-09 | 1.37E-07 | 10.004   |
| ZBTB3     | -0.84127 | 2.936172 | -6.08576 | 5.92E-09 | 1.39E-07 | 10.0266  |
| HOXC6     | 3.952386 | 2.06073  | 6.077592 | 6.18E-09 | 1.45E-07 | 9.967725 |
| BUB3      | 0.810856 | 6.802685 | 6.076113 | 6.23E-09 | 1.45E-07 | 9.774857 |
| ZNF790    | -1.97912 | 0.81577  | -6.07411 | 6.30E-09 | 1.47E-07 | 10.07344 |
| ASB16     | -1.26051 | 0.127546 | -6.06872 | 6.48E-09 | 1.51E-07 | 10.06472 |
| RAD51AP1  | 2.873902 | 4.003824 | 6.06658  | 6.55E-09 | 1.52E-07 | 10.05768 |
| ZNF425    | -1.51223 | 0.995629 | -6.06456 | 6.62E-09 | 1.53E-07 | 10.03702 |
| NISCH     | -1.03228 | 6.232031 | -6.06173 | 6.72E-09 | 1.55E-07 | 9.696387 |
| HELLS     | 2.252228 | 4.199836 | 6.058008 | 6.85E-09 | 1.58E-07 | 10.00986 |
| ZNF25     | -1.1522  | 3.137411 | -6.05743 | 6.87E-09 | 1.59E-07 | 9.822595 |
| NAT15     | -0.75099 | 6.297039 | -6.05462 | 6.98E-09 | 1.61E-07 | 9.657657 |
| EDA       | -2.06378 | 1.799662 | -6.05363 | 7.01E-09 | 1.61E-07 | 9.873042 |
| PDHB      | -0.8338  | 5.014686 | -6.04388 | 7.38E-09 | 1.69E-07 | 9.622618 |
| ERCC6L    | 2.508939 | 3.167828 | 6.038493 | 7.59E-09 | 1.74E-07 | 9.903203 |
| ARPC1B    | 1.563641 | 7.431955 | 6.036985 | 7.65E-09 | 1.75E-07 | 9.57858  |
| C8orf79   | -2.60204 | 0.35808  | -6.03557 | 7.71E-09 | 1.76E-07 | 9.87566  |
| FAHD2B    | -1.65163 | 1.879847 | -6.03421 | 7.76E-09 | 1.77E-07 | 9.808179 |
| LRIG1     | -2.14689 | 6.22086  | -6.02365 | 8.20E-09 | 1.87E-07 | 9.521866 |
| LOC646471 | -1.25701 | 1.809315 | -6.02014 | 8.35E-09 | 1.90E-07 | 9.778046 |
| LOC729234 | -1.46041 | 0.369907 | -6.01982 | 8.37E-09 | 1.90E-07 | 9.828079 |
| POLE2     | 2.294845 | 2.738394 | 6.019173 | 8.40E-09 | 1.90E-07 | 9.796278 |
| RAPGEF3   | -1.6596  | 3.502486 | -6.01688 | 8.50E-09 | 1.92E-07 | 9.543314 |
| CITED2    | -1.53227 | 5.171899 | -6.01603 | 8.54E-09 | 1.93E-07 | 9.463119 |
| ZNF483    | -2.12572 | 0.177339 | -6.01446 | 8.61E-09 | 1.94E-07 | 9.796564 |
| UBE2S     | 2.240916 | 4.837456 | 6.007507 | 8.92E-09 | 2.01E-07 | 9.723169 |
| COL14A1   | -2.48707 | 4.549039 | -6.00376 | 9.10E-09 | 2.04E-07 | 9.406092 |
| ZNF570    | -1.98608 | 0.224054 | -6.00021 | 9.27E-09 | 2.07E-07 | 9.727351 |
| ARHGAP6   | -2.07347 | 1.749475 | -6.00009 | 9.28E-09 | 2.07E-07 | 9.608208 |
| SMARCD3   | -1.71996 | 2.752046 | -6.00061 | 9.25E-09 | 2.07E-07 | 9.525854 |
| APOD      | -2.86286 | 3.129091 | -5.99771 | 9.39E-09 | 2.10E-07 | 9.411768 |
| CHRFAM7A  | -2.27823 | 0.611975 | -5.99535 | 9.51E-09 | 2.12E-07 | 9.678723 |
| FLNC      | -3.46927 | 5.011146 | -5.99565 | 9.49E-09 | 2.12E-07 | 9.385201 |
| NECAB3    | -1.14138 | 4.167426 | -5.99295 | 9.63E-09 | 2.14E-07 | 9.400997 |
| FOXF1     | -1.84986 | 3.314585 | -5.99139 | 9.70E-09 | 2.15E-07 | 9.416293 |
| LOC541471 | 2.35912  | 3.505133 | 5.984189 | 1.01E-08 | 2.23E-07 | 9.650892 |
| PSMA4     | 0.841967 | 6.846757 | 5.984016 | 1.01E-08 | 2.23E-07 | 9.306718 |
| WDR37     | -0.96027 | 4.447749 | -5.97337 | 1.07E-08 | 2.35E-07 | 9.292642 |
| PRUNE2    | -3.33689 | 3.675428 | -5.97368 | 1.06E-08 | 2.35E-07 | 9.266061 |
| KCNJ11    | -2.40658 | 0.67521  | -5.96934 | 1.09E-08 | 2.39E-07 | 9.537282 |
| NCAPD2    | 1.387286 | 7.403086 | 5.961629 | 1.13E-08 | 2.49E-07 | 9.193144 |
| GRK4      | -1.07633 | 1.653197 | -5.96075 | 1.14E-08 | 2.50E-07 | 9.505126 |

|           |          |          |          |          |          |          |
|-----------|----------|----------|----------|----------|----------|----------|
| ITGA7     | -1.94513 | 3.366869 | -5.95906 | 1.15E-08 | 2.51E-07 | 9.243542 |
| CDC37L1   | -0.89072 | 3.451853 | -5.95688 | 1.16E-08 | 2.53E-07 | 9.30498  |
| CCT5      | 1.171484 | 8.114935 | 5.956984 | 1.16E-08 | 2.53E-07 | 9.164429 |
| WNK4      | -2.90938 | 1.287819 | -5.95408 | 1.18E-08 | 2.57E-07 | 9.350534 |
| C14orf132 | -2.11335 | 3.529455 | -5.95326 | 1.18E-08 | 2.57E-07 | 9.192705 |
| NACC2     | -1.18692 | 2.747408 | -5.95273 | 1.19E-08 | 2.58E-07 | 9.340937 |
| C11orf82  | 3.088873 | 3.796733 | 5.952232 | 1.19E-08 | 2.58E-07 | 9.485517 |
| HNRNPC    | 0.632027 | 8.172372 | 5.951486 | 1.19E-08 | 2.59E-07 | 9.14473  |
| TTC28     | -1.74214 | 4.507884 | -5.94902 | 1.21E-08 | 2.61E-07 | 9.135108 |
| PPIA      | 1.141617 | 8.149028 | 5.948785 | 1.21E-08 | 2.61E-07 | 9.123916 |
| ISCU      | -0.85862 | 5.729078 | -5.94793 | 1.22E-08 | 2.62E-07 | 9.117226 |
| CORO2B    | -2.06098 | 0.46899  | -5.94287 | 1.25E-08 | 2.69E-07 | 9.434163 |
| ILF2      | 0.930542 | 7.369448 | 5.941219 | 1.26E-08 | 2.71E-07 | 9.083218 |
| FAM174B   | -1.94441 | 3.162245 | -5.94004 | 1.27E-08 | 2.71E-07 | 9.166802 |
| TCF3      | 1.12371  | 6.701679 | 5.940023 | 1.27E-08 | 2.71E-07 | 9.101034 |
| C6orf167  | 1.535276 | 4.44649  | 5.938104 | 1.28E-08 | 2.74E-07 | 9.355122 |
| FBXL17    | -0.99858 | 4.702792 | -5.93756 | 1.28E-08 | 2.74E-07 | 9.09415  |
| CHEK1     | 2.086616 | 3.891018 | 5.931694 | 1.32E-08 | 2.82E-07 | 9.388104 |
| PRKAG2    | -1.17051 | 4.307124 | -5.93177 | 1.32E-08 | 2.82E-07 | 9.080932 |
| BRCA1     | 1.934626 | 5.180406 | 5.924645 | 1.37E-08 | 2.92E-07 | 9.248339 |
| PDE7B     | -1.71612 | 1.467547 | -5.92217 | 1.39E-08 | 2.95E-07 | 9.284197 |
| NDC80     | 3.193106 | 3.943484 | 5.919619 | 1.41E-08 | 2.98E-07 | 9.328523 |
| CELF2     | -2.11696 | 3.986774 | -5.90939 | 1.48E-08 | 3.14E-07 | 8.94639  |
| PDE4D     | -1.56389 | 4.511815 | -5.90808 | 1.49E-08 | 3.16E-07 | 8.934215 |
| STARD8    | -1.4732  | 2.568434 | -5.90498 | 1.52E-08 | 3.20E-07 | 9.094791 |
| PRR11     | 3.180242 | 3.738904 | 5.902834 | 1.54E-08 | 3.23E-07 | 9.240402 |
| PATL1     | 0.834318 | 6.802346 | 5.901339 | 1.55E-08 | 3.26E-07 | 8.892166 |
| FMO5      | -2.99415 | 2.19129  | -5.8954  | 1.59E-08 | 3.35E-07 | 8.96395  |
| TFRC      | 1.864232 | 8.341625 | 5.895114 | 1.60E-08 | 3.35E-07 | 8.852735 |
| MCM5      | 1.578192 | 6.433382 | 5.894803 | 1.60E-08 | 3.35E-07 | 8.920587 |
| DMXL1     | -1.11529 | 5.626181 | -5.88967 | 1.64E-08 | 3.44E-07 | 8.824867 |
| DSCR3     | -0.77679 | 5.160179 | -5.88067 | 1.72E-08 | 3.59E-07 | 8.796225 |
| SACM1L    | -0.80838 | 5.415587 | -5.87972 | 1.73E-08 | 3.61E-07 | 8.781887 |
| MAOB      | -2.70824 | 3.223702 | -5.87928 | 1.73E-08 | 3.61E-07 | 8.816897 |
| HNRNPA2B1 | 0.639666 | 9.376301 | 5.876056 | 1.76E-08 | 3.66E-07 | 8.795427 |
| RAN       | 0.975839 | 7.675147 | 5.874874 | 1.77E-08 | 3.68E-07 | 8.750373 |
| C10orf26  | -0.91478 | 5.601438 | -5.87205 | 1.80E-08 | 3.73E-07 | 8.738192 |
| PGRMC2    | -0.80825 | 5.905682 | -5.87131 | 1.81E-08 | 3.74E-07 | 8.732454 |
| MAGI1     | -1.84089 | 5.172097 | -5.8708  | 1.81E-08 | 3.74E-07 | 8.733712 |
| IL1RL1    | -2.5724  | 0.266242 | -5.86949 | 1.82E-08 | 3.76E-07 | 9.062015 |
| TYMS      | 2.354767 | 5.304812 | 5.868635 | 1.83E-08 | 3.77E-07 | 9.000537 |
| ZNF57     | -1.12954 | 2.97339  | -5.86888 | 1.83E-08 | 3.77E-07 | 8.902125 |
| TAP1      | 1.702839 | 7.526762 | 5.868147 | 1.83E-08 | 3.77E-07 | 8.73018  |
| MOCS2     | -0.86838 | 4.411246 | -5.86683 | 1.85E-08 | 3.79E-07 | 8.767134 |
| LAD1      | 2.332785 | 8.16735  | 5.863103 | 1.88E-08 | 3.86E-07 | 8.704402 |
| RFWD3     | 1.139092 | 5.980866 | 5.858781 | 1.93E-08 | 3.94E-07 | 8.744646 |
| MASP1     | -2.53321 | 0.080445 | -5.85842 | 1.93E-08 | 3.94E-07 | 9.017538 |
| EPB41L4A  | -1.76531 | 3.931665 | -5.85801 | 1.93E-08 | 3.94E-07 | 8.706389 |
| C20orf20  | 1.331644 | 4.377741 | 5.853615 | 1.98E-08 | 4.03E-07 | 8.925071 |
| MCM6      | 1.313701 | 5.952886 | 5.851432 | 2.00E-08 | 4.07E-07 | 8.724229 |
| CDC6      | 3.468938 | 4.876927 | 5.850605 | 2.01E-08 | 4.08E-07 | 8.998122 |
| CDCA7     | 3.264374 | 5.298555 | 5.849991 | 2.01E-08 | 4.08E-07 | 8.976131 |
| FEM1C     | -1.05405 | 5.671905 | -5.84827 | 2.03E-08 | 4.11E-07 | 8.618381 |
| RNASEH2A  | 1.997218 | 4.355874 | 5.847623 | 2.04E-08 | 4.12E-07 | 8.950764 |
| C6orf174  | -1.95504 | 0.94228  | -5.84622 | 2.05E-08 | 4.15E-07 | 8.935353 |
| EPR1      | 3.66135  | 3.710648 | 5.843929 | 2.08E-08 | 4.19E-07 | 8.932874 |
| FAM82B    | -0.72589 | 5.140597 | -5.83684 | 2.15E-08 | 4.34E-07 | 8.580742 |
| KIAA1524  | 2.619399 | 3.964648 | 5.833857 | 2.19E-08 | 4.40E-07 | 8.918338 |



|          |          |          |          |          |          |          |
|----------|----------|----------|----------|----------|----------|----------|
| TMEM25   | -1.37675 | 3.226647 | -5.82989 | 2.23E-08 | 4.48E-07 | 8.652185 |
| BRIP1    | 2.614579 | 3.262696 | 5.825864 | 2.28E-08 | 4.57E-07 | 8.871887 |
| GPT2     | -1.98076 | 5.45445  | -5.81419 | 2.42E-08 | 4.84E-07 | 8.456271 |
| PIF1     | 2.240569 | 2.499997 | 5.80908  | 2.48E-08 | 4.96E-07 | 8.773068 |
| FILIP1   | -1.79458 | 2.42864  | -5.80819 | 2.49E-08 | 4.98E-07 | 8.596232 |
| ZCCHC24  | -1.72363 | 4.32468  | -5.80132 | 2.58E-08 | 5.14E-07 | 8.405673 |
| FGD4     | -1.95679 | 5.30871  | -5.80155 | 2.58E-08 | 5.14E-07 | 8.391959 |
| C15orf17 | -0.87675 | 4.939842 | -5.79943 | 2.61E-08 | 5.18E-07 | 8.398903 |
| H2AFX    | 1.514718 | 6.249464 | 5.790215 | 2.73E-08 | 5.41E-07 | 8.411869 |
| SLIT3    | -2.33583 | 4.461    | -5.79017 | 2.73E-08 | 5.41E-07 | 8.337807 |
| SFRS2    | 0.640261 | 7.71554  | 5.790207 | 2.73E-08 | 5.41E-07 | 8.333252 |
| DCAF13   | 1.131668 | 5.653907 | 5.789035 | 2.75E-08 | 5.43E-07 | 8.42775  |
| COL4A3BP | -0.8991  | 5.299004 | -5.78622 | 2.79E-08 | 5.50E-07 | 8.319146 |
| TBC1D9   | -1.49129 | 5.06597  | -5.78622 | 2.79E-08 | 5.50E-07 | 8.314779 |
| SESN1    | -1.39497 | 4.440343 | -5.78205 | 2.85E-08 | 5.61E-07 | 8.317201 |
| DDR2     | -2.05777 | 2.948846 | -5.78094 | 2.86E-08 | 5.63E-07 | 8.38618  |
| ACADVL   | -1.02766 | 7.237126 | -5.78037 | 2.87E-08 | 5.64E-07 | 8.303863 |
| MAGI3    | -1.267   | 4.908385 | -5.78005 | 2.88E-08 | 5.64E-07 | 8.29203  |
| SH3BP1   | 2.366222 | 6.106225 | 5.779346 | 2.89E-08 | 5.65E-07 | 8.46159  |
| SLC25A42 | -1.21905 | 2.674195 | -5.77414 | 2.97E-08 | 5.79E-07 | 8.46195  |
| DLX4     | 3.324748 | 0.484208 | 5.771762 | 3.00E-08 | 5.86E-07 | 8.512083 |
| MTHFD1L  | 1.680973 | 5.039272 | 5.769943 | 3.03E-08 | 5.90E-07 | 8.473647 |
| KIAA0232 | -1.1321  | 5.883909 | -5.76211 | 3.15E-08 | 6.13E-07 | 8.192954 |
| PSMD14   | 0.896132 | 6.053768 | 5.760102 | 3.18E-08 | 6.19E-07 | 8.23365  |
| TOM1L2   | -1.53629 | 6.527538 | -5.75854 | 3.21E-08 | 6.22E-07 | 8.190906 |
| PRKAB1   | -1.03028 | 5.262678 | -5.75879 | 3.21E-08 | 6.22E-07 | 8.18225  |
| UCK2     | 1.185777 | 4.742175 | 5.757248 | 3.23E-08 | 6.25E-07 | 8.390406 |
| ZNF347   | -2.1339  | 1.082101 | -5.75618 | 3.25E-08 | 6.28E-07 | 8.471055 |
| LIMS2    | -1.89031 | 3.808421 | -5.75386 | 3.29E-08 | 6.34E-07 | 8.193224 |
| WDHD1    | 2.278836 | 4.342979 | 5.752578 | 3.31E-08 | 6.38E-07 | 8.504479 |
| EFTUD2   | 0.867982 | 6.920059 | 5.748945 | 3.37E-08 | 6.48E-07 | 8.134177 |
| PDE4C    | -2.71693 | 0.11662  | -5.74772 | 3.39E-08 | 6.52E-07 | 8.471301 |
| FZD8     | -1.75964 | 2.824669 | -5.74598 | 3.42E-08 | 6.56E-07 | 8.250874 |
| THOC4    | 1.166859 | 5.3477   | 5.744564 | 3.45E-08 | 6.60E-07 | 8.244841 |
| C6orf225 | -1.61086 | 1.188201 | -5.74224 | 3.49E-08 | 6.67E-07 | 8.433851 |
| NFKBIL2  | 1.999862 | 5.2809   | 5.739215 | 3.54E-08 | 6.77E-07 | 8.331712 |
| ASB1     | -0.80839 | 4.391286 | -5.73878 | 3.55E-08 | 6.77E-07 | 8.140017 |
| C15orf42 | 3.015623 | 4.634637 | 5.732231 | 3.67E-08 | 6.98E-07 | 8.422595 |
| PSKH1    | -0.96982 | 5.301045 | -5.73249 | 3.66E-08 | 6.98E-07 | 8.053256 |
| GLT25D1  | 1.093354 | 7.018785 | 5.724294 | 3.82E-08 | 7.26E-07 | 8.016778 |
| ATP1B2   | -1.91657 | 0.622087 | -5.72274 | 3.85E-08 | 7.30E-07 | 8.35936  |
| ADAMTS1  | -2.26832 | 5.315498 | -5.72065 | 3.89E-08 | 7.37E-07 | 7.998513 |
| CENPN    | 1.291501 | 5.085199 | 5.719493 | 3.91E-08 | 7.40E-07 | 8.171972 |
| DNAH3    | 3.223862 | 0.531467 | 5.717834 | 3.94E-08 | 7.44E-07 | 8.262293 |
| MRVI1    | -2.21006 | 4.609283 | -5.71772 | 3.95E-08 | 7.44E-07 | 7.980357 |
| PTGES3   | 0.771489 | 7.940536 | 5.717996 | 3.94E-08 | 7.44E-07 | 7.979952 |
| FGF13    | -2.35326 | 0.85322  | -5.7126  | 4.05E-08 | 7.62E-07 | 8.263414 |
| KIAA0513 | -1.63448 | 4.429217 | -5.71204 | 4.06E-08 | 7.64E-07 | 7.965721 |
| ZNF493   | -1.95541 | 2.256513 | -5.70897 | 4.12E-08 | 7.74E-07 | 8.118143 |
| TNFSF12  | -1.29344 | 3.143399 | -5.70881 | 4.13E-08 | 7.74E-07 | 8.074126 |
| TTC37    | -0.90546 | 6.164502 | -5.70529 | 4.20E-08 | 7.87E-07 | 7.914487 |
| PRIM2    | 1.390942 | 3.589087 | 5.704431 | 4.22E-08 | 7.89E-07 | 8.269562 |
| FAM60A   | 1.291731 | 6.608408 | 5.701668 | 4.28E-08 | 7.99E-07 | 7.935095 |
| ELL2     | -1.88668 | 6.143355 | -5.70114 | 4.29E-08 | 8.00E-07 | 7.908906 |
| ZNF85    | -1.96353 | 0.768132 | -5.69853 | 4.35E-08 | 8.10E-07 | 8.232155 |
| FAM13A   | -1.4664  | 4.413011 | -5.69609 | 4.40E-08 | 8.19E-07 | 7.89415  |
| CMAH     | -1.67071 | 1.71285  | -5.69463 | 4.43E-08 | 8.24E-07 | 8.147069 |
| C21orf2  | -0.99427 | 3.461632 | -5.69299 | 4.47E-08 | 8.29E-07 | 7.990113 |

|          |          |          |          |          |          |          |
|----------|----------|----------|----------|----------|----------|----------|
| HMGB3    | 2.161468 | 5.472048 | 5.68987  | 4.54E-08 | 8.41E-07 | 8.085703 |
| FANCD2   | 2.271445 | 4.38605  | 5.680504 | 4.76E-08 | 8.81E-07 | 8.155919 |
| HBA1     | -2.3093  | 2.066255 | -5.6791  | 4.79E-08 | 8.85E-07 | 7.962814 |
| ROGDI    | -1.03657 | 4.336221 | -5.67891 | 4.80E-08 | 8.85E-07 | 7.837158 |
| CCDC69   | -1.9793  | 4.21893  | -5.67523 | 4.89E-08 | 9.01E-07 | 7.784595 |
| SIK3     | -0.79286 | 5.798477 | -5.67172 | 4.97E-08 | 9.16E-07 | 7.749989 |
| GPM6B    | -1.6766  | 2.470914 | -5.66921 | 5.04E-08 | 9.26E-07 | 7.92548  |
| CYB5D2   | -1.03875 | 3.271362 | -5.669   | 5.04E-08 | 9.26E-07 | 7.892177 |
| NEK1     | -0.9839  | 3.982383 | -5.66694 | 5.09E-08 | 9.34E-07 | 7.8117   |
| RBM5     | -0.90945 | 6.01897  | -5.66461 | 5.15E-08 | 9.44E-07 | 7.715109 |
| PPAP2B   | -1.54901 | 5.520592 | -5.66415 | 5.17E-08 | 9.45E-07 | 7.715371 |
| OAS3     | 1.661824 | 7.674966 | 5.661163 | 5.24E-08 | 9.58E-07 | 7.705936 |
| SNTB1    | -2.16268 | 4.250038 | -5.65955 | 5.29E-08 | 9.64E-07 | 7.703881 |
| STAT1    | 1.457052 | 8.378896 | 5.658805 | 5.31E-08 | 9.67E-07 | 7.689477 |
| HLF      | -2.43847 | 2.346468 | -5.65374 | 5.44E-08 | 9.90E-07 | 7.794825 |
| RTKN     | 1.335654 | 5.660091 | 5.652461 | 5.48E-08 | 9.95E-07 | 7.779518 |
| F11R     | 1.130933 | 8.444201 | 5.649176 | 5.57E-08 | 1.01E-06 | 7.64788  |
| FAM64A   | 3.25831  | 2.763244 | 5.64392  | 5.72E-08 | 1.04E-06 | 7.954696 |
| CARKD    | -0.93913 | 5.276846 | -5.63774 | 5.90E-08 | 1.07E-06 | 7.592934 |
| ATAD5    | 2.014474 | 4.008302 | 5.636215 | 5.94E-08 | 1.07E-06 | 7.952202 |
| NDUFA5   | -0.96419 | 5.597286 | -5.63544 | 5.96E-08 | 1.08E-06 | 7.574805 |
| RANBP1   | 1.277877 | 6.279556 | 5.634457 | 5.99E-08 | 1.08E-06 | 7.630773 |
| CFL2     | -1.5192  | 4.57001  | -5.63253 | 6.05E-08 | 1.09E-06 | 7.576258 |
| FAM83H   | 2.140412 | 8.338162 | 5.629515 | 6.14E-08 | 1.10E-06 | 7.548879 |
| LAMB2    | -1.5401  | 7.093787 | -5.62776 | 6.20E-08 | 1.11E-06 | 7.567154 |
| ST5      | -1.21526 | 6.49907  | -5.62505 | 6.28E-08 | 1.13E-06 | 7.533476 |
| SYTL4    | -1.31265 | 3.229927 | -5.62294 | 6.35E-08 | 1.14E-06 | 7.647733 |
| S1PR1    | -1.81375 | 4.005091 | -5.62205 | 6.38E-08 | 1.14E-06 | 7.542616 |
| MTBP     | 2.03759  | 3.251263 | 5.621494 | 6.39E-08 | 1.14E-06 | 7.90688  |
| WLS      | -1.43351 | 6.039977 | -5.62149 | 6.39E-08 | 1.14E-06 | 7.512566 |
| SEC14L1  | -1.05577 | 6.372369 | -5.61957 | 6.46E-08 | 1.15E-06 | 7.502485 |
| E2F1     | 1.87832  | 4.399934 | 5.615373 | 6.59E-08 | 1.17E-06 | 7.817634 |
| WFDC1    | -1.8024  | 2.118381 | -5.61325 | 6.66E-08 | 1.18E-06 | 7.690478 |
| CRYZL1   | -0.79125 | 3.304326 | -5.61337 | 6.66E-08 | 1.18E-06 | 7.646283 |
| JUP      | 2.206696 | 10.78904 | 5.613102 | 6.67E-08 | 1.18E-06 | 7.506236 |
| E2F2     | 2.69599  | 3.900032 | 5.610047 | 6.77E-08 | 1.20E-06 | 7.852472 |
| PURA     | -0.71976 | 4.738714 | -5.60946 | 6.79E-08 | 1.20E-06 | 7.491072 |
| DACT3    | -1.86527 | 2.018354 | -5.60555 | 6.92E-08 | 1.22E-06 | 7.656226 |
| SNRPG    | 1.243221 | 4.861133 | 5.601908 | 7.05E-08 | 1.24E-06 | 7.628757 |
| SLAIN1   | -2.45398 | 1.270253 | -5.60075 | 7.09E-08 | 1.25E-06 | 7.669009 |
| FGF2     | -1.91903 | 2.388549 | -5.59751 | 7.21E-08 | 1.27E-06 | 7.564403 |
| FAM111B  | 2.753282 | 4.236845 | 5.593681 | 7.34E-08 | 1.29E-06 | 7.769482 |
| FILIP1L  | -2.02712 | 5.48287  | -5.59386 | 7.34E-08 | 1.29E-06 | 7.381081 |
| ATP6V0A2 | -0.77909 | 4.812059 | -5.59226 | 7.40E-08 | 1.30E-06 | 7.400313 |
| EIF4A3   | 0.929475 | 6.536066 | 5.590611 | 7.46E-08 | 1.31E-06 | 7.380936 |
| DUSP3    | -0.95807 | 6.461182 | -5.58806 | 7.55E-08 | 1.32E-06 | 7.350418 |
| SAP30L   | -0.75567 | 5.062033 | -5.58741 | 7.58E-08 | 1.32E-06 | 7.363868 |
| TH1L     | 0.958807 | 6.546607 | 5.585337 | 7.66E-08 | 1.34E-06 | 7.356555 |
| VPS13D   | -1.06212 | 6.850429 | -5.58506 | 7.67E-08 | 1.34E-06 | 7.344504 |
| PPP1R12B | -2.42352 | 6.200121 | -5.57895 | 7.90E-08 | 1.37E-06 | 7.33054  |
| PITPNM2  | -1.31627 | 4.96982  | -5.57788 | 7.94E-08 | 1.38E-06 | 7.304608 |
| KIF20B   | 1.647869 | 5.30656  | 5.576853 | 7.99E-08 | 1.39E-06 | 7.500124 |
| PIP5K1C  | -0.94302 | 6.6749   | -5.57086 | 8.23E-08 | 1.43E-06 | 7.270881 |
| ESCO2    | 2.838813 | 3.708928 | 5.566139 | 8.42E-08 | 1.46E-06 | 7.649076 |
| HEMK1    | -0.95555 | 3.341191 | -5.56563 | 8.44E-08 | 1.46E-06 | 7.395401 |
| MCM3     | 1.169899 | 6.983976 | 5.565167 | 8.46E-08 | 1.46E-06 | 7.24914  |
| ZNF793   | -2.25216 | 0.787655 | -5.56416 | 8.50E-08 | 1.47E-06 | 7.56765  |
| ZNF429   | -1.96614 | 1.475101 | -5.56103 | 8.64E-08 | 1.49E-06 | 7.506525 |

|            |          |          |          |          |          |          |
|------------|----------|----------|----------|----------|----------|----------|
| JPH2       | -2.30842 | 2.424832 | -5.5608  | 8.65E-08 | 1.49E-06 | 7.349527 |
| APOC2      | 4.175197 | 1.029781 | 5.55924  | 8.71E-08 | 1.50E-06 | 7.538719 |
| C18orf32   | -0.95097 | 5.060472 | -5.55882 | 8.73E-08 | 1.50E-06 | 7.219657 |
| SNRPA      | 0.797447 | 6.008512 | 5.558237 | 8.76E-08 | 1.50E-06 | 7.250763 |
| KLF2       | -2.01046 | 4.898843 | -5.55803 | 8.77E-08 | 1.50E-06 | 7.204881 |
| KIAA1737   | -0.87928 | 5.057351 | -5.55747 | 8.79E-08 | 1.50E-06 | 7.215702 |
| NFIA       | -1.48982 | 6.294602 | -5.55766 | 8.78E-08 | 1.50E-06 | 7.210147 |
| SATL1      | -0.99796 | 0.41447  | -5.55687 | 8.82E-08 | 1.50E-06 | 7.605535 |
| FRY        | -1.89279 | 3.820744 | -5.55358 | 8.96E-08 | 1.53E-06 | 7.221425 |
| OSR1       | -2.00852 | 1.081794 | -5.54879 | 9.18E-08 | 1.56E-06 | 7.487819 |
| FAM190B    | -0.87702 | 6.018262 | -5.54857 | 9.19E-08 | 1.56E-06 | 7.154951 |
| FUS        | 0.750241 | 7.405443 | 5.546397 | 9.29E-08 | 1.58E-06 | 7.144061 |
| CENPW      | 2.578306 | 3.4213   | 5.54551  | 9.33E-08 | 1.58E-06 | 7.553146 |
| ATAD2      | 1.432504 | 6.457253 | 5.54352  | 9.42E-08 | 1.60E-06 | 7.191662 |
| C13orf33   | -2.00666 | 2.120205 | -5.53992 | 9.59E-08 | 1.62E-06 | 7.315219 |
| DMRTA1     | -2.70775 | 0.022002 | -5.5393  | 9.62E-08 | 1.62E-06 | 7.48352  |
| C1orf135   | 2.15525  | 1.957918 | 5.537304 | 9.71E-08 | 1.64E-06 | 7.480443 |
| PID1       | -1.89683 | 2.352431 | -5.53193 | 9.97E-08 | 1.67E-06 | 7.26013  |
| DNAJC9     | 1.066715 | 4.966451 | 5.532251 | 9.96E-08 | 1.67E-06 | 7.258507 |
| CLIC6      | -3.20647 | 3.155158 | -5.53206 | 9.97E-08 | 1.67E-06 | 7.11272  |
| MTMR10     | -0.91451 | 5.570578 | -5.53248 | 9.95E-08 | 1.67E-06 | 7.080355 |
| PGR        | -2.17034 | 0.349436 | -5.52748 | 1.02E-07 | 1.71E-06 | 7.434941 |
| U2AF2      | 0.644538 | 7.014601 | 5.527404 | 1.02E-07 | 1.71E-06 | 7.054921 |
| C19orf40   | 1.718009 | 1.231213 | 5.525184 | 1.03E-07 | 1.73E-06 | 7.402123 |
| SLC4A2     | -1.35506 | 6.670411 | -5.52448 | 1.03E-07 | 1.73E-06 | 7.056298 |
| CLDN4      | 3.929714 | 7.437253 | 5.52396  | 1.04E-07 | 1.73E-06 | 7.248643 |
| ALG9       | -0.75854 | 4.614154 | -5.52353 | 1.04E-07 | 1.73E-06 | 7.085805 |
| ASTN2      | -2.00922 | 1.691901 | -5.52231 | 1.05E-07 | 1.74E-06 | 7.292177 |
| TUBA1C     | 1.263284 | 8.86968  | 5.518931 | 1.06E-07 | 1.77E-06 | 7.027075 |
| ZKSCAN3    | -1.09352 | 1.6433   | -5.51859 | 1.07E-07 | 1.77E-06 | 7.368071 |
| ST6GALNAC6 | -1.16665 | 4.415697 | -5.51734 | 1.07E-07 | 1.78E-06 | 7.045634 |
| ARMCX1     | -1.62879 | 2.085944 | -5.51615 | 1.08E-07 | 1.79E-06 | 7.250295 |
| VPS39      | -0.56641 | 6.374517 | -5.51572 | 1.08E-07 | 1.79E-06 | 6.998023 |
| C6orf72    | -0.74611 | 4.599868 | -5.5122  | 1.10E-07 | 1.82E-06 | 7.033357 |
| OMD        | -2.62465 | 0.219568 | -5.51051 | 1.11E-07 | 1.83E-06 | 7.338361 |
| RFC3       | 1.699292 | 4.828821 | 5.510034 | 1.11E-07 | 1.83E-06 | 7.254225 |
| ACOX2      | -1.93378 | 0.577892 | -5.50955 | 1.11E-07 | 1.83E-06 | 7.349687 |
| ECHDC2     | -1.49067 | 4.287711 | -5.50737 | 1.13E-07 | 1.85E-06 | 6.99036  |
| CHAF1A     | 1.305659 | 4.887684 | 5.505961 | 1.13E-07 | 1.86E-06 | 7.177238 |
| FGD6       | 1.649503 | 5.84387  | 5.505804 | 1.13E-07 | 1.86E-06 | 7.08811  |
| PHYHIP     | -2.03133 | 0.542561 | -5.50315 | 1.15E-07 | 1.88E-06 | 7.315136 |
| DEPDC1B    | 2.958081 | 3.827805 | 5.496192 | 1.19E-07 | 1.95E-06 | 7.325048 |
| HOXA11     | 4.673049 | 0.688551 | 5.494757 | 1.20E-07 | 1.96E-06 | 7.246672 |
| SMOC2      | -2.3681  | 3.770208 | -5.49482 | 1.20E-07 | 1.96E-06 | 6.925768 |
| C9orf130   | -1.2981  | 2.229003 | -5.49439 | 1.20E-07 | 1.96E-06 | 7.169451 |
| CACNA1H    | -2.28759 | 4.208659 | -5.49405 | 1.20E-07 | 1.96E-06 | 6.907799 |
| GIN54      | 2.681547 | 3.499439 | 5.49331  | 1.21E-07 | 1.96E-06 | 7.311801 |
| NBAS       | -0.73081 | 5.791538 | -5.49291 | 1.21E-07 | 1.97E-06 | 6.890517 |
| DISP1      | -1.4111  | 2.986231 | -5.49236 | 1.21E-07 | 1.97E-06 | 7.042704 |
| ULBP1      | 3.521439 | 0.582924 | 5.489223 | 1.23E-07 | 2.00E-06 | 7.221205 |
| POC1A      | 1.873026 | 3.111848 | 5.488795 | 1.23E-07 | 2.00E-06 | 7.288017 |
| KCNE4      | -1.76198 | 1.958431 | -5.48854 | 1.23E-07 | 2.00E-06 | 7.122935 |
| SATB1      | -1.42328 | 4.381754 | -5.48629 | 1.25E-07 | 2.02E-06 | 6.887623 |
| NCRNA00152 | 2.144989 | 3.379256 | 5.484612 | 1.26E-07 | 2.03E-06 | 7.268042 |
| RFX2       | -1.36477 | 3.953493 | -5.48264 | 1.27E-07 | 2.05E-06 | 6.903975 |
| C14orf28   | -0.88655 | 2.217786 | -5.48044 | 1.28E-07 | 2.07E-06 | 7.148945 |
| TUBE1      | -0.86733 | 3.371781 | -5.47941 | 1.29E-07 | 2.08E-06 | 6.99085  |
| ANP32E     | 1.139165 | 6.267791 | 5.474698 | 1.32E-07 | 2.12E-06 | 6.857252 |

|           |          |          |          |          |          |          |
|-----------|----------|----------|----------|----------|----------|----------|
| OBFC1     | -1.0735  | 4.678293 | -5.47301 | 1.33E-07 | 2.14E-06 | 6.824141 |
| PSMD11    | 0.949363 | 6.867377 | 5.472666 | 1.33E-07 | 2.14E-06 | 6.804557 |
| MTMR12    | -0.99607 | 5.902621 | -5.4721  | 1.34E-07 | 2.14E-06 | 6.790814 |
| SYTL3     | -1.39604 | 2.000912 | -5.47053 | 1.35E-07 | 2.16E-06 | 7.075747 |
| CENPO     | 1.572133 | 3.231754 | 5.468954 | 1.36E-07 | 2.17E-06 | 7.184453 |
| TRIP13    | 3.01097  | 4.763968 | 5.464776 | 1.39E-07 | 2.22E-06 | 7.155546 |
| SSC5D     | -2.03404 | 3.224456 | -5.46394 | 1.39E-07 | 2.22E-06 | 6.832762 |
| XRCC2     | 2.533806 | 2.654993 | 5.463001 | 1.40E-07 | 2.23E-06 | 7.159533 |
| BID       | 1.437709 | 4.912216 | 5.463094 | 1.40E-07 | 2.23E-06 | 6.988607 |
| C19orf48  | 1.344775 | 5.624997 | 5.455601 | 1.45E-07 | 2.31E-06 | 6.843372 |
| PTPRM     | -1.63962 | 4.671459 | -5.45492 | 1.46E-07 | 2.31E-06 | 6.720219 |
| CCDC159   | -0.99178 | 2.173983 | -5.45373 | 1.46E-07 | 2.32E-06 | 7.0198   |
| DNALI1    | -2.35779 | 1.099796 | -5.45178 | 1.48E-07 | 2.34E-06 | 6.998283 |
| AZI2      | -0.67871 | 5.028699 | -5.45199 | 1.48E-07 | 2.34E-06 | 6.723354 |
| CHADL     | -1.50724 | 1.103987 | -5.45121 | 1.48E-07 | 2.34E-06 | 7.067052 |
| TM7SF2    | -1.58689 | 3.62324  | -5.45059 | 1.49E-07 | 2.35E-06 | 6.765937 |
| TRIM59    | 2.063219 | 4.205601 | 5.449759 | 1.49E-07 | 2.35E-06 | 7.066583 |
| RPS6KA5   | -1.21468 | 3.408421 | -5.44944 | 1.50E-07 | 2.36E-06 | 6.809342 |
| CRISPLD2  | -2.08898 | 5.85867  | -5.44763 | 1.51E-07 | 2.37E-06 | 6.689953 |
| UFSP2     | -0.80597 | 4.060229 | -5.4456  | 1.52E-07 | 2.39E-06 | 6.759551 |
| GCNT2     | -1.98463 | 3.395164 | -5.44541 | 1.53E-07 | 2.39E-06 | 6.734634 |
| BAX       | 1.158925 | 4.43728  | 5.444065 | 1.54E-07 | 2.40E-06 | 6.929764 |
| STARD13   | -1.60724 | 4.166725 | -5.4442  | 1.53E-07 | 2.40E-06 | 6.692937 |
| HERC3     | -1.14558 | 5.001465 | -5.4442  | 1.53E-07 | 2.40E-06 | 6.670822 |
| SENp8     | -0.93673 | 0.753743 | -5.44242 | 1.55E-07 | 2.42E-06 | 7.070236 |
| FAM13B    | -0.98921 | 4.812614 | -5.44226 | 1.55E-07 | 2.42E-06 | 6.674894 |
| ITGA10    | -1.61695 | 0.34971  | -5.44154 | 1.55E-07 | 2.42E-06 | 7.059578 |
| PER1      | -1.91879 | 6.15711  | -5.4417  | 1.55E-07 | 2.42E-06 | 6.664227 |
| TLE2      | -1.78442 | 3.23087  | -5.44076 | 1.56E-07 | 2.43E-06 | 6.740939 |
| C20orf194 | -1.6392  | 4.507151 | -5.43783 | 1.58E-07 | 2.46E-06 | 6.644936 |
| FOXO3     | -0.92157 | 6.788305 | -5.43712 | 1.59E-07 | 2.47E-06 | 6.635944 |
| RNLS      | -2.27983 | 0.768028 | -5.43323 | 1.62E-07 | 2.51E-06 | 6.953603 |
| DNAJC27   | -0.76176 | 2.92092  | -5.43305 | 1.62E-07 | 2.51E-06 | 6.848525 |
| BRCA2     | 2.379529 | 4.394222 | 5.431142 | 1.64E-07 | 2.53E-06 | 6.98765  |
| CENPL     | 1.368837 | 3.678715 | 5.430282 | 1.64E-07 | 2.54E-06 | 6.968444 |
| ARL6IP1   | 1.030679 | 8.135618 | 5.42753  | 1.66E-07 | 2.57E-06 | 6.584383 |
| SERPINH1  | 1.6121   | 7.661057 | 5.426185 | 1.68E-07 | 2.58E-06 | 6.580757 |
| GEN1      | 1.27487  | 4.960484 | 5.423599 | 1.70E-07 | 2.61E-06 | 6.775578 |
| PTGDS     | -2.18378 | 2.934223 | -5.4238  | 1.69E-07 | 2.61E-06 | 6.660807 |
| NUDT1     | 2.157108 | 3.480257 | 5.422274 | 1.71E-07 | 2.62E-06 | 6.97876  |
| HMGB2     | 1.428394 | 6.461132 | 5.421461 | 1.71E-07 | 2.63E-06 | 6.612017 |
| C9orf45   | -1.29196 | 2.659841 | -5.42009 | 1.73E-07 | 2.65E-06 | 6.760035 |
| USP47     | -0.66936 | 6.517367 | -5.41468 | 1.77E-07 | 2.71E-06 | 6.522188 |
| ACTG2     | -3.67456 | 5.56239  | -5.41382 | 1.78E-07 | 2.72E-06 | 6.562108 |
| CDKN1C    | -1.70008 | 3.848503 | -5.41238 | 1.79E-07 | 2.74E-06 | 6.559422 |
| C22orf32  | -0.83405 | 4.593593 | -5.41172 | 1.80E-07 | 2.74E-06 | 6.55323  |
| DMPK      | -1.29387 | 5.005868 | -5.41066 | 1.81E-07 | 2.76E-06 | 6.509059 |
| CACNB4    | -2.1437  | 0.454393 | -5.40668 | 1.84E-07 | 2.80E-06 | 6.868562 |
| APOLD1    | -1.58205 | 4.405305 | -5.40671 | 1.84E-07 | 2.80E-06 | 6.504492 |
| C9orf5    | -0.98414 | 6.659733 | -5.40569 | 1.85E-07 | 2.81E-06 | 6.486773 |
| FAM188A   | -0.78547 | 4.00524  | -5.40445 | 1.86E-07 | 2.82E-06 | 6.573225 |
| CCT3      | 0.832108 | 7.939625 | 5.404466 | 1.86E-07 | 2.82E-06 | 6.475444 |
| ZBTB4     | -1.0823  | 6.70562  | -5.40289 | 1.88E-07 | 2.84E-06 | 6.476117 |
| LOC728743 | -1.3338  | 2.597073 | -5.40082 | 1.90E-07 | 2.87E-06 | 6.67567  |
| TACR2     | -2.31569 | 0.542781 | -5.39986 | 1.90E-07 | 2.88E-06 | 6.815325 |
| GINS2     | 2.789248 | 3.584693 | 5.39737  | 1.93E-07 | 2.91E-06 | 6.872773 |
| CRTC1     | -0.93349 | 4.191027 | -5.39646 | 1.94E-07 | 2.92E-06 | 6.506694 |
| WBSCR17   | -2.17256 | 0.259235 | -5.39588 | 1.94E-07 | 2.93E-06 | 6.828428 |

|           |          |          |          |          |          |          |
|-----------|----------|----------|----------|----------|----------|----------|
| CCNG1     | -1.2057  | 6.084642 | -5.39551 | 1.94E-07 | 2.93E-06 | 6.433622 |
| PSMA3     | 0.896675 | 6.105581 | 5.39494  | 1.95E-07 | 2.93E-06 | 6.476574 |
| LRRN4CL   | -1.68497 | 0.717167 | -5.39388 | 1.96E-07 | 2.94E-06 | 6.817745 |
| NR2F2     | -1.8184  | 5.617206 | -5.39269 | 1.97E-07 | 2.96E-06 | 6.423355 |
| OXCT1     | -1.86204 | 4.987887 | -5.3907  | 1.99E-07 | 2.98E-06 | 6.41068  |
| CLIP3     | -1.74013 | 3.638779 | -5.38172 | 2.08E-07 | 3.11E-06 | 6.428968 |
| C9orf140  | 2.62064  | 5.538625 | 5.378064 | 2.12E-07 | 3.17E-06 | 6.657422 |
| TEAD4     | 1.681134 | 4.386359 | 5.377224 | 2.12E-07 | 3.18E-06 | 6.682904 |
| DNA2      | 1.916358 | 3.468923 | 5.374071 | 2.16E-07 | 3.22E-06 | 6.751001 |
| NOP56     | 0.938142 | 6.959753 | 5.3723   | 2.18E-07 | 3.24E-06 | 6.328828 |
| ARHGEF9   | -1.4218  | 3.989764 | -5.3701  | 2.20E-07 | 3.28E-06 | 6.367093 |
| NEURL3    | 3.620253 | 0.069159 | 5.368428 | 2.22E-07 | 3.30E-06 | 6.681516 |
| SNRPD1    | 1.182478 | 5.622849 | 5.363651 | 2.27E-07 | 3.37E-06 | 6.396036 |
| MAGI2     | -1.57086 | 1.964546 | -5.36248 | 2.28E-07 | 3.39E-06 | 6.553996 |
| ARPC5     | 0.699333 | 7.46822  | 5.361334 | 2.29E-07 | 3.40E-06 | 6.269307 |
| ATXN7     | -0.81809 | 5.174675 | -5.35992 | 2.31E-07 | 3.42E-06 | 6.278362 |
| SLC22A17  | -1.69403 | 2.497937 | -5.35311 | 2.39E-07 | 3.53E-06 | 6.421361 |
| MMP14     | 1.474818 | 8.162586 | 5.353106 | 2.39E-07 | 3.53E-06 | 6.231749 |
| GRINA     | 0.977836 | 7.616544 | 5.350316 | 2.42E-07 | 3.57E-06 | 6.217777 |
| KCNJ12    | -2.25221 | 0.162232 | -5.34806 | 2.45E-07 | 3.61E-06 | 6.612007 |
| NOSTRIN   | -2.38992 | 1.96062  | -5.3451  | 2.48E-07 | 3.66E-06 | 6.384699 |
| S100A11   | 1.589617 | 9.597227 | 5.343614 | 2.50E-07 | 3.68E-06 | 6.210859 |
| DNAJC6    | -2.05284 | 1.444359 | -5.34338 | 2.50E-07 | 3.68E-06 | 6.481208 |
| RELL1     | -1.16009 | 4.887036 | -5.34171 | 2.52E-07 | 3.71E-06 | 6.194128 |
| CDCA4     | 1.943115 | 5.055961 | 5.340366 | 2.54E-07 | 3.73E-06 | 6.460574 |
| DSN1      | 1.297413 | 4.488257 | 5.339975 | 2.54E-07 | 3.73E-06 | 6.456599 |
| INPP5J    | -1.66915 | 2.306175 | -5.33739 | 2.58E-07 | 3.77E-06 | 6.384095 |
| ZFYVE28   | -1.43534 | 2.907202 | -5.33662 | 2.59E-07 | 3.78E-06 | 6.322017 |
| SYNGR1    | -2.08945 | 3.183082 | -5.33609 | 2.59E-07 | 3.79E-06 | 6.233824 |
| SLC19A2   | -1.17947 | 4.500864 | -5.33462 | 2.61E-07 | 3.81E-06 | 6.17994  |
| SNHG1     | 1.143334 | 5.364785 | 5.333871 | 2.62E-07 | 3.82E-06 | 6.283062 |
| LTBP4     | -1.66114 | 7.50132  | -5.33352 | 2.62E-07 | 3.82E-06 | 6.186068 |
| UTRN      | -1.40363 | 6.332617 | -5.33009 | 2.67E-07 | 3.88E-06 | 6.134913 |
| AKAP6     | -1.76235 | 2.371909 | -5.32975 | 2.67E-07 | 3.88E-06 | 6.320727 |
| LRFN4     | 1.998124 | 5.208228 | 5.325928 | 2.72E-07 | 3.95E-06 | 6.380932 |
| ADAMTS15  | -2.25201 | 1.322733 | -5.32469 | 2.74E-07 | 3.97E-06 | 6.392079 |
| ATP9B     | -0.8703  | 4.381818 | -5.3245  | 2.74E-07 | 3.97E-06 | 6.15979  |
| NDUFS1    | -0.82398 | 6.342867 | -5.32355 | 2.75E-07 | 3.99E-06 | 6.095919 |
| RNF150    | -2.3774  | 0.881436 | -5.32179 | 2.78E-07 | 4.02E-06 | 6.414454 |
| ARRB1     | -1.83065 | 3.625835 | -5.32111 | 2.79E-07 | 4.02E-06 | 6.144373 |
| CSE1L     | 0.931736 | 7.542022 | 5.320044 | 2.80E-07 | 4.04E-06 | 6.076895 |
| DTYMK     | 1.335123 | 4.498495 | 5.319299 | 2.81E-07 | 4.05E-06 | 6.364438 |
| FAM13C    | -1.76466 | 1.498411 | -5.318   | 2.83E-07 | 4.07E-06 | 6.387423 |
| TMEM206   | 1.522385 | 3.16089  | 5.3175   | 2.83E-07 | 4.08E-06 | 6.490749 |
| MFAP4     | -2.61784 | 5.230281 | -5.31629 | 2.85E-07 | 4.10E-06 | 6.075291 |
| JAM3      | -1.51804 | 3.930749 | -5.31527 | 2.86E-07 | 4.11E-06 | 6.110256 |
| SYP       | -1.87916 | 0.272046 | -5.31218 | 2.91E-07 | 4.17E-06 | 6.461438 |
| KANK2     | -1.78052 | 5.82905  | -5.31189 | 2.91E-07 | 4.17E-06 | 6.048748 |
| SNPH      | -1.67525 | 2.513705 | -5.31067 | 2.93E-07 | 4.19E-06 | 6.22637  |
| TCEA3     | -1.66792 | 4.144923 | -5.30691 | 2.98E-07 | 4.26E-06 | 6.049571 |
| PIGU      | 0.954075 | 4.994744 | 5.301984 | 3.05E-07 | 4.36E-06 | 6.160921 |
| TOB2      | -0.89163 | 6.564032 | -5.29572 | 3.15E-07 | 4.49E-06 | 5.971045 |
| E2F7      | 3.826774 | 4.033841 | 5.290063 | 3.23E-07 | 4.60E-06 | 6.387055 |
| TMEM26    | 2.478601 | 0.632782 | 5.29011  | 3.23E-07 | 4.60E-06 | 6.339143 |
| C17orf108 | -1.32388 | 1.606841 | -5.28996 | 3.23E-07 | 4.60E-06 | 6.292999 |
| ANAPC16   | -0.7524  | 6.1127   | -5.28916 | 3.25E-07 | 4.61E-06 | 5.933834 |
| MFSD7     | -1.61877 | 1.496542 | -5.28577 | 3.30E-07 | 4.69E-06 | 6.258552 |
| COBLL1    | -1.56968 | 6.182519 | -5.28372 | 3.33E-07 | 4.73E-06 | 5.920347 |

|           |          |          |          |          |          |          |
|-----------|----------|----------|----------|----------|----------|----------|
| C5        | -1.80619 | 2.371346 | -5.28269 | 3.35E-07 | 4.75E-06 | 6.104263 |
| CDH23     | -2.118   | 0.53378  | -5.28215 | 3.36E-07 | 4.75E-06 | 6.293425 |
| AGAP11    | -1.78465 | 0.656465 | -5.28089 | 3.38E-07 | 4.77E-06 | 6.300354 |
| FBXO38    | -0.54092 | 5.157224 | -5.28131 | 3.37E-07 | 4.77E-06 | 5.92558  |
| PRMT1     | 0.927488 | 6.480809 | 5.280974 | 3.38E-07 | 4.77E-06 | 5.924041 |
| CSRP1     | -1.40118 | 7.707965 | -5.27994 | 3.39E-07 | 4.78E-06 | 5.93713  |
| SNX18     | -0.92323 | 5.009804 | -5.27808 | 3.42E-07 | 4.82E-06 | 5.902004 |
| LRP2BP    | -1.15293 | 0.949892 | -5.27674 | 3.45E-07 | 4.85E-06 | 6.2976   |
| PSMB3     | 1.125724 | 6.923816 | 5.275327 | 3.47E-07 | 4.88E-06 | 5.885902 |
| MLF1IP    | 2.007268 | 4.514031 | 5.274256 | 3.49E-07 | 4.89E-06 | 6.229301 |
| APOOL     | -0.899   | 3.654574 | -5.2743  | 3.49E-07 | 4.89E-06 | 5.995801 |
| CDADC1    | -0.79506 | 2.55     | -5.26897 | 3.58E-07 | 5.01E-06 | 6.13874  |
| NMI       | 1.319314 | 5.005851 | 5.263376 | 3.67E-07 | 5.14E-06 | 6.032074 |
| GPX3      | -2.64881 | 5.5265   | -5.26203 | 3.70E-07 | 5.16E-06 | 5.829762 |
| TSC2      | -0.7132  | 6.766354 | -5.26202 | 3.70E-07 | 5.16E-06 | 5.816067 |
| AG2       | -1.91723 | 4.619351 | -5.26158 | 3.70E-07 | 5.17E-06 | 5.815028 |
| RDH12     | -2.78025 | 0.232865 | -5.25784 | 3.77E-07 | 5.26E-06 | 6.161614 |
| SMPD1     | -1.01374 | 4.617899 | -5.25611 | 3.80E-07 | 5.30E-06 | 5.817904 |
| SEMA3G    | -1.59147 | 2.361822 | -5.25372 | 3.85E-07 | 5.35E-06 | 5.996529 |
| ATP1B3    | 1.667963 | 7.801787 | 5.252925 | 3.86E-07 | 5.37E-06 | 5.772294 |
| ZNF167    | -1.67849 | -0.01749 | -5.25236 | 3.87E-07 | 5.38E-06 | 6.210869 |
| TAL1      | -1.59725 | 0.624641 | -5.25092 | 3.90E-07 | 5.41E-06 | 6.178236 |
| PARP14    | 1.246961 | 7.376339 | 5.247966 | 3.95E-07 | 5.48E-06 | 5.74964  |
| MYO1B     | 1.483157 | 7.244494 | 5.247729 | 3.96E-07 | 5.48E-06 | 5.759891 |
| ERGIC1    | -0.96132 | 7.186467 | -5.2473  | 3.96E-07 | 5.48E-06 | 5.761661 |
| RAVER1    | 0.690911 | 7.054921 | 5.247482 | 3.96E-07 | 5.48E-06 | 5.743325 |
| MPRIP     | -0.82629 | 6.804458 | -5.24389 | 4.03E-07 | 5.56E-06 | 5.735198 |
| HEATR1    | 0.888118 | 6.601522 | 5.240422 | 4.10E-07 | 5.65E-06 | 5.729434 |
| TSPYL1    | -0.8611  | 6.181676 | -5.23981 | 4.11E-07 | 5.66E-06 | 5.707903 |
| FOXS1     | 2.267984 | 0.503978 | 5.238081 | 4.14E-07 | 5.70E-06 | 6.112199 |
| HSPE1     | 1.163362 | 6.34227  | 5.238118 | 4.14E-07 | 5.70E-06 | 5.750498 |
| C16orf75  | 2.455352 | 3.863017 | 5.236854 | 4.17E-07 | 5.72E-06 | 6.13431  |
| SEC22C    | -0.75993 | 3.858739 | -5.2363  | 4.18E-07 | 5.73E-06 | 5.812239 |
| PVT1      | 2.454068 | 3.171708 | 5.233034 | 4.24E-07 | 5.82E-06 | 6.135182 |
| SGEF      | -2.03154 | 3.217952 | -5.23109 | 4.28E-07 | 5.87E-06 | 5.74972  |
| SPINT2    | 1.415057 | 8.38958  | 5.230536 | 4.29E-07 | 5.88E-06 | 5.667837 |
| TEX2      | -0.79005 | 5.983074 | -5.22484 | 4.41E-07 | 6.03E-06 | 5.637717 |
| CCL21     | -2.95339 | 2.572526 | -5.21647 | 4.59E-07 | 6.27E-06 | 5.683215 |
| RBL1      | 1.672164 | 4.292876 | 5.216119 | 4.60E-07 | 6.27E-06 | 5.95712  |
| SGSM1     | -2.46157 | 0.749166 | -5.21464 | 4.63E-07 | 6.31E-06 | 5.938533 |
| EBNA1BP2  | 0.865897 | 5.906982 | 5.21478  | 4.63E-07 | 6.31E-06 | 5.656024 |
| SNTA1     | -1.23864 | 3.510129 | -5.21105 | 4.71E-07 | 6.41E-06 | 5.691373 |
| C18orf56  | 1.944616 | 0.15251  | 5.208811 | 4.76E-07 | 6.47E-06 | 5.984409 |
| SLC7A2    | -2.45022 | 3.578221 | -5.20799 | 4.78E-07 | 6.49E-06 | 5.596338 |
| CFL1      | 0.804211 | 9.67942  | 5.205992 | 4.82E-07 | 6.54E-06 | 5.598098 |
| TSN       | 0.779527 | 6.510593 | 5.204145 | 4.87E-07 | 6.59E-06 | 5.562885 |
| SLC41A1   | -0.90314 | 5.607767 | -5.20409 | 4.87E-07 | 6.59E-06 | 5.545228 |
| PDE1B     | -1.83726 | 0.705475 | -5.20288 | 4.90E-07 | 6.61E-06 | 5.93962  |
| TNS1      | -2.47046 | 7.314746 | -5.20272 | 4.90E-07 | 6.61E-06 | 5.598895 |
| ZMYND11   | -0.83878 | 6.41653  | -5.20302 | 4.89E-07 | 6.61E-06 | 5.542045 |
| NOP2      | 1.065361 | 5.790152 | 5.20111  | 4.94E-07 | 6.66E-06 | 5.620202 |
| DYNC1LI2  | -0.68515 | 7.034602 | -5.20085 | 4.94E-07 | 6.66E-06 | 5.540044 |
| PTPLA     | -1.82716 | 0.919999 | -5.20022 | 4.96E-07 | 6.67E-06 | 5.9111   |
| LOC200030 | -0.8955  | 4.500366 | -5.19953 | 4.97E-07 | 6.69E-06 | 5.5741   |
| SELENBP1  | -2.77909 | 4.161191 | -5.19762 | 5.02E-07 | 6.74E-06 | 5.525899 |
| HIST1H2AE | 2.741399 | 0.928578 | 5.19724  | 5.03E-07 | 6.75E-06 | 5.936752 |
| PLXNA4    | -2.16399 | 1.367615 | -5.19275 | 5.14E-07 | 6.89E-06 | 5.789572 |
| TCF19     | 1.380872 | 4.949825 | 5.190506 | 5.19E-07 | 6.95E-06 | 5.716385 |

|           |          |          |          |          |          |          |
|-----------|----------|----------|----------|----------|----------|----------|
| ZNF181    | -0.87757 | 2.985711 | -5.18969 | 5.21E-07 | 6.97E-06 | 5.703311 |
| SLC13A3   | -2.27263 | 0.922446 | -5.18389 | 5.36E-07 | 7.16E-06 | 5.800177 |
| CAD       | 1.0695   | 6.90994  | 5.18329  | 5.37E-07 | 7.17E-06 | 5.462645 |
| APC2      | -1.56646 | 1.106171 | -5.18263 | 5.39E-07 | 7.19E-06 | 5.83618  |
| STX6      | 0.933916 | 6.04174  | 5.18131  | 5.42E-07 | 7.23E-06 | 5.497702 |
| ZNF43     | -1.83629 | 2.046346 | -5.18109 | 5.43E-07 | 7.23E-06 | 5.680656 |
| ZFP64     | 0.965677 | 5.168138 | 5.180051 | 5.45E-07 | 7.26E-06 | 5.581316 |
| ZNF331    | -1.84518 | 3.094462 | -5.17508 | 5.58E-07 | 7.41E-06 | 5.519382 |
| TMEM167B  | -0.63214 | 5.567669 | -5.1751  | 5.58E-07 | 7.41E-06 | 5.418603 |
| RSPO3     | -2.5387  | 1.254208 | -5.17102 | 5.69E-07 | 7.55E-06 | 5.662605 |
| CCDC99    | 1.324587 | 4.141933 | 5.170816 | 5.70E-07 | 7.55E-06 | 5.733479 |
| NFIX      | -1.34655 | 7.036386 | -5.16868 | 5.75E-07 | 7.62E-06 | 5.407805 |
| CLDN7     | 4.493644 | 6.182772 | 5.158371 | 6.04E-07 | 7.99E-06 | 5.761295 |
| CDK2      | 1.059637 | 5.014555 | 5.157842 | 6.05E-07 | 8.00E-06 | 5.513574 |
| SVEP1     | -1.77499 | 3.717881 | -5.15735 | 6.07E-07 | 8.01E-06 | 5.388431 |
| PODN      | -2.18645 | 3.876995 | -5.15144 | 6.24E-07 | 8.23E-06 | 5.331945 |
| CDK4      | 1.089186 | 6.415901 | 5.150616 | 6.26E-07 | 8.26E-06 | 5.341667 |
| XPR1      | 1.287194 | 6.563958 | 5.148226 | 6.33E-07 | 8.34E-06 | 5.333353 |
| SLC25A16  | -0.67645 | 3.550255 | -5.1476  | 6.35E-07 | 8.36E-06 | 5.455468 |
| PRKCE     | -0.87999 | 3.569795 | -5.14584 | 6.41E-07 | 8.42E-06 | 5.421926 |
| ACOX3     | -1.08221 | 4.091895 | -5.14482 | 6.44E-07 | 8.45E-06 | 5.346584 |
| NCALD     | -1.52323 | 3.089789 | -5.14356 | 6.47E-07 | 8.49E-06 | 5.405627 |
| RAP1A     | -0.84971 | 5.81017  | -5.14355 | 6.48E-07 | 8.49E-06 | 5.268179 |
| C1orf106  | 2.120214 | 7.005414 | 5.143292 | 6.48E-07 | 8.49E-06 | 5.338722 |
| GNAQ      | -0.92242 | 6.582013 | -5.13989 | 6.59E-07 | 8.62E-06 | 5.258919 |
| DUSP22    | -0.97581 | 4.674328 | -5.13633 | 6.70E-07 | 8.75E-06 | 5.270401 |
| RERE      | -0.99366 | 7.312256 | -5.13477 | 6.75E-07 | 8.81E-06 | 5.252982 |
| INCENP    | 1.158347 | 5.434354 | 5.134342 | 6.76E-07 | 8.82E-06 | 5.363576 |
| HDHD2     | -0.88224 | 4.391297 | -5.13255 | 6.82E-07 | 8.89E-06 | 5.279746 |
| ZBED3     | -1.61866 | 1.612118 | -5.13219 | 6.83E-07 | 8.89E-06 | 5.551851 |
| ERN1      | -1.26333 | 3.886289 | -5.13099 | 6.87E-07 | 8.93E-06 | 5.290698 |
| KIAA1529  | -2.17038 | 0.007516 | -5.12973 | 6.91E-07 | 8.97E-06 | 5.643859 |
| FAM110A   | 1.714631 | 4.59524  | 5.129712 | 6.91E-07 | 8.97E-06 | 5.537548 |
| USP2      | -1.73653 | 1.747848 | -5.12911 | 6.93E-07 | 8.99E-06 | 5.50473  |
| C14orf139 | -1.48975 | 1.062452 | -5.12649 | 7.01E-07 | 9.09E-06 | 5.596197 |
| TMEM108   | -1.99352 | 0.827031 | -5.12536 | 7.05E-07 | 9.13E-06 | 5.568995 |
| SIGLEC7   | 2.401796 | -0.15179 | 5.121141 | 7.19E-07 | 9.30E-06 | 5.607396 |
| LIMCH1    | -1.86688 | 4.131726 | -5.12093 | 7.20E-07 | 9.31E-06 | 5.192025 |
| TACSTD2   | 2.666888 | 8.155893 | 5.118101 | 7.30E-07 | 9.41E-06 | 5.180837 |
| MDH1      | -0.66054 | 6.509287 | -5.11797 | 7.30E-07 | 9.41E-06 | 5.155063 |
| CPEB4     | -1.23207 | 5.71349  | -5.11784 | 7.30E-07 | 9.41E-06 | 5.152909 |
| HOXA10    | 5.164091 | 3.322482 | 5.116445 | 7.35E-07 | 9.47E-06 | 5.594278 |
| F8        | -1.32779 | 2.901726 | -5.11254 | 7.49E-07 | 9.63E-06 | 5.309642 |
| TYMP      | 2.385684 | 6.965704 | 5.112396 | 7.49E-07 | 9.63E-06 | 5.224478 |
| PFDN2     | 1.233429 | 4.943984 | 5.110192 | 7.57E-07 | 9.71E-06 | 5.33458  |
| TPM3      | 0.729478 | 8.509451 | 5.110156 | 7.57E-07 | 9.71E-06 | 5.133711 |
| GIPC3     | -1.30064 | 2.356807 | -5.10986 | 7.58E-07 | 9.72E-06 | 5.382728 |
| C7orf11   | 1.151276 | 4.550174 | 5.1092   | 7.61E-07 | 9.74E-06 | 5.379319 |
| CKAP5     | 0.847322 | 7.557171 | 5.103961 | 7.79E-07 | 9.97E-06 | 5.089154 |
| BCL2L12   | 1.326302 | 3.958766 | 5.103415 | 7.81E-07 | 9.99E-06 | 5.454719 |
| ATP5A1    | -1.04153 | 8.188115 | -5.10214 | 7.86E-07 | 1.00E-05 | 5.132035 |
| ATL1      | -1.20228 | 2.373173 | -5.10189 | 7.87E-07 | 1.00E-05 | 5.357115 |
| ABCC9     | -1.89503 | 2.707213 | -5.10086 | 7.91E-07 | 1.01E-05 | 5.22257  |
| CHTF18    | 1.621262 | 4.270541 | 5.099754 | 7.95E-07 | 1.01E-05 | 5.434007 |
| ENO1      | 1.11784  | 9.869741 | 5.095715 | 8.10E-07 | 1.03E-05 | 5.09631  |
| MYO9A     | -0.95125 | 4.915691 | -5.09473 | 8.14E-07 | 1.03E-05 | 5.070533 |
| CRELD1    | -0.97311 | 3.742519 | -5.09389 | 8.17E-07 | 1.04E-05 | 5.160621 |
| NR4A3     | -2.04571 | 3.025207 | -5.09377 | 8.17E-07 | 1.04E-05 | 5.14623  |

|           |          |          |          |          |          |          |
|-----------|----------|----------|----------|----------|----------|----------|
| HNRNPR    | 0.557512 | 7.134291 | 5.092707 | 8.21E-07 | 1.04E-05 | 5.038198 |
| EIF4EBP3  | -1.34254 | 2.368836 | -5.09182 | 8.25E-07 | 1.04E-05 | 5.298689 |
| C17orf48  | -0.76726 | 2.408749 | -5.09131 | 8.27E-07 | 1.05E-05 | 5.360772 |
| FHIT      | -1.84213 | 0.420203 | -5.0907  | 8.29E-07 | 1.05E-05 | 5.464423 |
| DTWD1     | -0.66259 | 3.650132 | -5.08978 | 8.33E-07 | 1.05E-05 | 5.183557 |
| CCPG1     | -1.29112 | 6.062019 | -5.08862 | 8.37E-07 | 1.06E-05 | 5.025746 |
| SHE       | -1.49167 | 1.948109 | -5.08832 | 8.38E-07 | 1.06E-05 | 5.322953 |
| GPRASP2   | -1.1591  | 2.46992  | -5.08782 | 8.40E-07 | 1.06E-05 | 5.285278 |
| DLEU2     | 1.797988 | 2.271923 | 5.08717  | 8.43E-07 | 1.06E-05 | 5.497529 |
| ZSWIM6    | -0.92573 | 4.777369 | -5.08671 | 8.45E-07 | 1.06E-05 | 5.04335  |
| C12orf51  | -0.8828  | 6.500391 | -5.08631 | 8.46E-07 | 1.06E-05 | 5.015653 |
| PRIM1     | 1.618916 | 3.129146 | 5.085105 | 8.51E-07 | 1.07E-05 | 5.460738 |
| ZC3H6     | -1.16597 | 4.083913 | -5.08325 | 8.58E-07 | 1.08E-05 | 5.063887 |
| LAMC2     | 2.560204 | 8.282533 | 5.083316 | 8.58E-07 | 1.08E-05 | 5.01408  |
| ZNF569    | -1.7252  | 0.828375 | -5.08273 | 8.60E-07 | 1.08E-05 | 5.404025 |
| ZNF10     | -1.26111 | 2.892026 | -5.08282 | 8.60E-07 | 1.08E-05 | 5.187131 |
| CSDC2     | -1.87266 | 0.118874 | -5.08171 | 8.65E-07 | 1.08E-05 | 5.440376 |
| C4orf31   | -2.21345 | 0.762334 | -5.08058 | 8.69E-07 | 1.09E-05 | 5.360281 |
| KAT2A     | 0.884135 | 6.026071 | 5.080276 | 8.70E-07 | 1.09E-05 | 5.039707 |
| YIF1B     | 1.069483 | 4.91386  | 5.079757 | 8.72E-07 | 1.09E-05 | 5.180821 |
| VSIG1     | -3.42665 | 2.153867 | -5.07937 | 8.74E-07 | 1.09E-05 | 5.076926 |
| ZER1      | -0.80273 | 6.374917 | -5.07454 | 8.94E-07 | 1.11E-05 | 4.95996  |
| CENPH     | 1.837427 | 3.153716 | 5.074307 | 8.95E-07 | 1.11E-05 | 5.421864 |
| FERMT1    | 2.55187  | 6.472215 | 5.073446 | 8.98E-07 | 1.11E-05 | 5.126865 |
| LTF       | -3.29579 | 1.57255  | -5.07352 | 8.98E-07 | 1.11E-05 | 5.11106  |
| GALNT12   | -1.84596 | 4.51774  | -5.07144 | 9.07E-07 | 1.12E-05 | 4.955569 |
| PACSIN2   | -0.89394 | 5.620596 | -5.07072 | 9.10E-07 | 1.13E-05 | 4.942107 |
| PSMC4     | 0.809084 | 6.415447 | 5.070111 | 9.13E-07 | 1.13E-05 | 4.963143 |
| SLC25A34  | -1.48301 | 0.401763 | -5.06929 | 9.16E-07 | 1.13E-05 | 5.390574 |
| RASGRP2   | -1.85704 | 0.846488 | -5.0689  | 9.18E-07 | 1.13E-05 | 5.330675 |
| LOC202181 | -1.67524 | 1.871465 | -5.06902 | 9.17E-07 | 1.13E-05 | 5.226453 |
| TCEAL1    | -1.02532 | 3.023075 | -5.06568 | 9.31E-07 | 1.15E-05 | 5.119547 |
| CLDN5     | -1.63996 | 3.208153 | -5.05854 | 9.63E-07 | 1.19E-05 | 5.001558 |
| TMTC2     | -1.21291 | 4.24032  | -5.0577  | 9.67E-07 | 1.19E-05 | 4.934398 |
| IL6ST     | -1.506   | 5.586589 | -5.05662 | 9.72E-07 | 1.19E-05 | 4.879991 |
| CTDSPL    | -0.9665  | 6.072374 | -5.05673 | 9.71E-07 | 1.19E-05 | 4.878838 |
| KIAA1109  | -1.01601 | 6.427314 | -5.05291 | 9.88E-07 | 1.21E-05 | 4.867074 |
| GGCT      | 1.114389 | 5.743225 | 5.050134 | 1.00E-06 | 1.23E-05 | 4.94856  |
| SLC16A13  | 1.90836  | 2.655182 | 5.048475 | 1.01E-06 | 1.24E-05 | 5.327489 |
| CAND2     | -1.88161 | 1.366571 | -5.04805 | 1.01E-06 | 1.24E-05 | 5.175235 |
| THSD4     | -2.03378 | 4.941059 | -5.04356 | 1.03E-06 | 1.26E-05 | 4.823743 |
| DDX27     | 0.779797 | 6.213689 | 5.042278 | 1.04E-06 | 1.27E-05 | 4.849457 |
| MON2      | -0.68965 | 6.001699 | -5.03783 | 1.06E-06 | 1.29E-05 | 4.792904 |
| HAGH      | -0.78005 | 3.984317 | -5.0348  | 1.07E-06 | 1.31E-05 | 4.888113 |
| HOXB7     | 4.181261 | 3.392663 | 5.034395 | 1.08E-06 | 1.31E-05 | 5.248086 |
| HOMER2    | -2.48292 | 3.076709 | -5.03384 | 1.08E-06 | 1.32E-05 | 4.846272 |
| TCOF1     | 0.969311 | 6.587668 | 5.029887 | 1.10E-06 | 1.34E-05 | 4.782602 |
| MXI1      | -1.09146 | 5.198829 | -5.02875 | 1.11E-06 | 1.34E-05 | 4.76058  |
| CHAF1B    | 1.800557 | 3.565796 | 5.027927 | 1.11E-06 | 1.35E-05 | 5.194227 |
| ADD1      | -0.76087 | 7.64547  | -5.02786 | 1.11E-06 | 1.35E-05 | 4.777138 |
| FGF14     | -2.26218 | 0.136931 | -5.02733 | 1.11E-06 | 1.35E-05 | 5.179871 |
| CYYR1     | -1.30576 | 3.244639 | -5.025   | 1.12E-06 | 1.36E-05 | 4.877794 |
| IKZF4     | -0.80314 | 3.729583 | -5.0238  | 1.13E-06 | 1.37E-05 | 4.863843 |
| N6AMT1    | -0.83924 | 2.592121 | -5.0205  | 1.15E-06 | 1.39E-05 | 5.012656 |
| LARGE     | -1.52783 | 4.26929  | -5.02009 | 1.15E-06 | 1.39E-05 | 4.747503 |
| ACYP1     | 1.317075 | 2.563293 | 5.019208 | 1.16E-06 | 1.39E-05 | 5.187777 |
| MT1X      | -2.05915 | 4.667207 | -5.01774 | 1.16E-06 | 1.40E-05 | 4.710439 |
| NTN1      | -2.30204 | 4.677068 | -5.01729 | 1.17E-06 | 1.40E-05 | 4.708893 |



|          |          |          |          |          |          |          |
|----------|----------|----------|----------|----------|----------|----------|
| ANKRD29  | -1.94709 | 1.842672 | -5.017   | 1.17E-06 | 1.41E-05 | 4.96925  |
| CAPN7    | -0.68551 | 5.055429 | -5.01658 | 1.17E-06 | 1.41E-05 | 4.726012 |
| PJA2     | -0.91967 | 6.945942 | -5.01665 | 1.17E-06 | 1.41E-05 | 4.713437 |
| ZNF397   | -0.88207 | 3.556457 | -5.01389 | 1.18E-06 | 1.42E-05 | 4.83384  |
| DHX34    | 0.790894 | 5.626781 | 5.012748 | 1.19E-06 | 1.43E-05 | 4.765548 |
| TTLL11   | -0.93158 | 1.978004 | -5.01202 | 1.19E-06 | 1.43E-05 | 5.046224 |
| ITGA2    | 1.750021 | 6.817379 | 5.010244 | 1.20E-06 | 1.44E-05 | 4.729103 |
| ADCY1    | -1.70662 | 1.880935 | -5.00642 | 1.23E-06 | 1.47E-05 | 4.943338 |
| SETBP1   | -2.00168 | 3.928831 | -5.0064  | 1.23E-06 | 1.47E-05 | 4.685941 |
| PARVA    | -0.94647 | 5.989551 | -5.0041  | 1.24E-06 | 1.48E-05 | 4.643848 |
| PTTG1IP  | -0.80425 | 7.66828  | -4.99827 | 1.27E-06 | 1.52E-05 | 4.647678 |
| KIAA0895 | -1.35187 | 3.771889 | -4.99782 | 1.27E-06 | 1.52E-05 | 4.69982  |
| GPT      | -2.38201 | 0.439208 | -4.99653 | 1.28E-06 | 1.53E-05 | 5.015577 |
| XKR8     | -0.75295 | 3.069802 | -4.98945 | 1.32E-06 | 1.58E-05 | 4.815346 |
| ADAR     | 0.6521   | 8.835778 | 4.98899  | 1.33E-06 | 1.58E-05 | 4.60305  |
| ZFP106   | -0.80944 | 6.555879 | -4.98645 | 1.34E-06 | 1.60E-05 | 4.570722 |
| RHOH     | -2.02835 | 4.115177 | -4.98088 | 1.38E-06 | 1.64E-05 | 4.563657 |
| DCAF8    | -0.58891 | 6.164368 | -4.97644 | 1.41E-06 | 1.67E-05 | 4.520387 |
| MSRB3    | -1.88189 | 4.300313 | -4.97545 | 1.41E-06 | 1.68E-05 | 4.535093 |
| TRIM23   | -0.76038 | 3.207141 | -4.97484 | 1.42E-06 | 1.68E-05 | 4.72579  |
| TMSB10   | 1.194917 | 9.164278 | 4.974956 | 1.42E-06 | 1.68E-05 | 4.537215 |
| HOXC10   | 6.096472 | 2.863037 | 4.973102 | 1.43E-06 | 1.69E-05 | 4.988453 |
| MTERFD3  | -0.87024 | 2.947085 | -4.97224 | 1.43E-06 | 1.69E-05 | 4.74216  |
| RALY     | 0.644004 | 7.022965 | 4.97088  | 1.44E-06 | 1.70E-05 | 4.497759 |
| SYNM     | -3.00367 | 5.174014 | -4.97029 | 1.45E-06 | 1.71E-05 | 4.516909 |
| ULBP2    | 4.556057 | 2.414963 | 4.964411 | 1.49E-06 | 1.75E-05 | 4.951587 |
| HIGD1A   | -0.97639 | 6.578526 | -4.96338 | 1.49E-06 | 1.76E-05 | 4.471969 |
| NCAPG2   | 1.657641 | 5.204523 | 4.961406 | 1.51E-06 | 1.77E-05 | 4.69742  |
| C6orf115 | 1.386952 | 4.927385 | 4.958848 | 1.52E-06 | 1.79E-05 | 4.690797 |
| RNASE4   | -2.12533 | 4.330031 | -4.9578  | 1.53E-06 | 1.80E-05 | 4.451824 |
| DSEL     | -1.55413 | 2.141375 | -4.95641 | 1.54E-06 | 1.81E-05 | 4.70393  |
| MSH2     | 1.073073 | 5.201722 | 4.955264 | 1.55E-06 | 1.82E-05 | 4.588036 |
| HMGH4    | 0.782814 | 5.844831 | 4.953703 | 1.56E-06 | 1.83E-05 | 4.485095 |
| ALPK3    | -1.63905 | 3.644987 | -4.95293 | 1.57E-06 | 1.83E-05 | 4.491622 |
| EIF4B    | -0.6959  | 7.943457 | -4.9524  | 1.57E-06 | 1.84E-05 | 4.450535 |
| REEP5    | -0.70482 | 6.876122 | -4.94992 | 1.59E-06 | 1.86E-05 | 4.413539 |
| PRPF19   | 0.839927 | 6.708576 | 4.948911 | 1.60E-06 | 1.86E-05 | 4.413708 |
| CD80     | 2.465212 | 0.188495 | 4.94849  | 1.60E-06 | 1.87E-05 | 4.881569 |
| SALL4    | 4.087402 | 1.550713 | 4.946716 | 1.61E-06 | 1.88E-05 | 4.876762 |
| ATP5J    | -0.8947  | 6.08137  | -4.94577 | 1.62E-06 | 1.89E-05 | 4.386737 |
| NNT      | -1.27129 | 6.076322 | -4.94543 | 1.62E-06 | 1.89E-05 | 4.389918 |
| EIF3B    | 0.793901 | 7.849954 | 4.945366 | 1.62E-06 | 1.89E-05 | 4.387679 |
| G3BP1    | 0.667492 | 7.040641 | 4.944858 | 1.62E-06 | 1.89E-05 | 4.383357 |
| CNRIP1   | -1.25801 | 2.09562  | -4.94433 | 1.63E-06 | 1.89E-05 | 4.696382 |
| NOP58    | 0.867671 | 6.436491 | 4.94349  | 1.64E-06 | 1.90E-05 | 4.404137 |
| DBF4     | 1.601918 | 4.402608 | 4.941873 | 1.65E-06 | 1.91E-05 | 4.723017 |
| MAN1C1   | -1.55536 | 2.628253 | -4.94193 | 1.65E-06 | 1.91E-05 | 4.565991 |
| TOMM40   | 1.058651 | 6.013717 | 4.941797 | 1.65E-06 | 1.91E-05 | 4.440139 |
| FERMT2   | -1.73153 | 4.900398 | -4.94208 | 1.65E-06 | 1.91E-05 | 4.375033 |
| CMTM4    | -1.55933 | 5.994953 | -4.94013 | 1.66E-06 | 1.92E-05 | 4.369943 |
| NOX4     | 2.986463 | 0.961626 | 4.938977 | 1.67E-06 | 1.93E-05 | 4.843602 |
| KIAA1683 | -1.73091 | 1.751778 | -4.93856 | 1.67E-06 | 1.93E-05 | 4.663503 |
| SNED1    | -1.56956 | 3.806495 | -4.93826 | 1.67E-06 | 1.93E-05 | 4.417982 |
| FOXP1    | -1.20733 | 6.124081 | -4.93814 | 1.68E-06 | 1.93E-05 | 4.357625 |
| ARRDC4   | -1.8184  | 5.111915 | -4.93842 | 1.67E-06 | 1.93E-05 | 4.357499 |
| FAT4     | -1.69495 | 3.20021  | -4.93754 | 1.68E-06 | 1.93E-05 | 4.463199 |
| FOXO3B   | -0.754   | 5.186294 | -4.93596 | 1.69E-06 | 1.94E-05 | 4.361045 |
| DES      | -4.98575 | 4.892981 | -4.93442 | 1.70E-06 | 1.96E-05 | 4.404479 |

|         |          |          |          |          |          |          |
|---------|----------|----------|----------|----------|----------|----------|
| EIF2AK1 | 0.659915 | 7.826965 | 4.932189 | 1.72E-06 | 1.97E-05 | 4.331312 |
| SF3B3   | 0.737252 | 8.001125 | 4.93018  | 1.74E-06 | 1.99E-05 | 4.324286 |
| CDC7    | 1.699771 | 3.499285 | 4.928854 | 1.75E-06 | 2.00E-05 | 4.76381  |
| COL1A1  | 2.37941  | 11.19358 | 4.927775 | 1.76E-06 | 2.01E-05 | 4.358259 |
| SASH1   | -1.51316 | 5.402475 | -4.92678 | 1.76E-06 | 2.02E-05 | 4.304897 |
| ARSK    | -0.93004 | 2.692037 | -4.92489 | 1.78E-06 | 2.03E-05 | 4.567846 |
| HMGN5   | -1.69505 | 2.162271 | -4.92499 | 1.78E-06 | 2.03E-05 | 4.546809 |
| TXNIP   | -2.14756 | 8.148753 | -4.92274 | 1.80E-06 | 2.05E-05 | 4.363735 |
| DLC1    | -1.50036 | 4.476313 | -4.92085 | 1.81E-06 | 2.07E-05 | 4.299989 |
| TPSB2   | -1.93879 | 2.953436 | -4.92034 | 1.82E-06 | 2.07E-05 | 4.395638 |
| F12     | 3.444934 | 3.05141  | 4.919845 | 1.82E-06 | 2.07E-05 | 4.779215 |
| CLK4    | -0.96435 | 4.094701 | -4.92002 | 1.82E-06 | 2.07E-05 | 4.35612  |
| ZNF439  | -1.56    | 0.714352 | -4.91952 | 1.82E-06 | 2.07E-05 | 4.715345 |
| MCEE    | -0.85979 | 2.084176 | -4.91935 | 1.83E-06 | 2.07E-05 | 4.640028 |
| GAMT    | -1.97984 | 2.335924 | -4.91857 | 1.83E-06 | 2.08E-05 | 4.455911 |
| DHRS7   | -1.11606 | 5.421913 | -4.91633 | 1.85E-06 | 2.10E-05 | 4.259832 |
| AGRN    | 1.276314 | 9.062365 | 4.915746 | 1.86E-06 | 2.10E-05 | 4.273112 |
| INTS7   | 0.937792 | 5.254473 | 4.914423 | 1.87E-06 | 2.11E-05 | 4.386256 |
| DDX17   | -0.55982 | 8.896821 | -4.91299 | 1.88E-06 | 2.12E-05 | 4.302252 |
| NUP85   | 0.820755 | 5.231614 | 4.909375 | 1.91E-06 | 2.16E-05 | 4.354451 |
| FAM129A | -2.04731 | 5.960146 | -4.90823 | 1.92E-06 | 2.17E-05 | 4.238652 |
| SSB     | 0.779419 | 6.120968 | 4.906114 | 1.94E-06 | 2.19E-05 | 4.255501 |
| YDJC    | 1.261367 | 4.734008 | 4.902674 | 1.97E-06 | 2.22E-05 | 4.458    |
| PUS1    | 1.007055 | 4.398921 | 4.90205  | 1.97E-06 | 2.22E-05 | 4.470749 |
| PNPLA4  | -1.38065 | 3.296625 | -4.90049 | 1.99E-06 | 2.24E-05 | 4.319457 |
| ARMCX2  | -1.63368 | 2.892175 | -4.8993  | 2.00E-06 | 2.25E-05 | 4.336074 |
| FMOD    | -2.05962 | 5.425889 | -4.8991  | 2.00E-06 | 2.25E-05 | 4.190953 |
| MASP2   | -1.46521 | 0.319902 | -4.89748 | 2.02E-06 | 2.26E-05 | 4.654641 |
| NOL11   | 0.734941 | 5.679141 | 4.897455 | 2.02E-06 | 2.26E-05 | 4.249848 |
| SNRPC   | 0.947609 | 5.40526  | 4.896921 | 2.02E-06 | 2.26E-05 | 4.294074 |
| SPATA6  | -1.50924 | 1.35356  | -4.89466 | 2.04E-06 | 2.29E-05 | 4.551842 |
| TMEM189 | 1.128895 | 6.62063  | 4.894537 | 2.04E-06 | 2.29E-05 | 4.193591 |
| ILDR1   | 4.035589 | 2.90769  | 4.893884 | 2.05E-06 | 2.29E-05 | 4.659473 |
| CNST    | -0.83761 | 5.349522 | -4.89329 | 2.05E-06 | 2.29E-05 | 4.165773 |
| RPS6KA2 | -1.40064 | 5.030383 | -4.89295 | 2.06E-06 | 2.30E-05 | 4.161598 |
| TECPR2  | -0.76264 | 5.174779 | -4.89223 | 2.06E-06 | 2.30E-05 | 4.170137 |
| SCN4B   | -1.68321 | 1.60367  | -4.89204 | 2.07E-06 | 2.30E-05 | 4.488177 |
| TEK     | -1.51261 | 2.560512 | -4.88937 | 2.09E-06 | 2.33E-05 | 4.355083 |
| ARL6IP6 | 1.145466 | 4.928184 | 4.88799  | 2.10E-06 | 2.34E-05 | 4.345904 |
| PKP3    | 2.173784 | 7.443937 | 4.888114 | 2.10E-06 | 2.34E-05 | 4.17698  |
| PDK2    | -0.89669 | 5.293355 | -4.88644 | 2.12E-06 | 2.35E-05 | 4.136349 |
| HAUS8   | 1.183567 | 2.865388 | 4.885826 | 2.13E-06 | 2.36E-05 | 4.592359 |
| TMEM41A | 0.872461 | 5.458954 | 4.885706 | 2.13E-06 | 2.36E-05 | 4.232253 |
| SUOX    | -0.88098 | 3.780734 | -4.8848  | 2.14E-06 | 2.37E-05 | 4.242111 |
| ATP5O   | -0.82484 | 6.327927 | -4.88422 | 2.14E-06 | 2.37E-05 | 4.119583 |
| TXNDC12 | 0.655083 | 6.360515 | 4.883673 | 2.15E-06 | 2.37E-05 | 4.136434 |
| LYRM7   | -0.76908 | 4.357135 | -4.87661 | 2.22E-06 | 2.45E-05 | 4.15801  |
| ATP8A1  | -2.37752 | 3.832739 | -4.87661 | 2.22E-06 | 2.45E-05 | 4.110153 |
| POLI    | -0.98696 | 3.547848 | -4.87569 | 2.22E-06 | 2.46E-05 | 4.218997 |
| GYPC    | -1.39475 | 3.015869 | -4.87493 | 2.23E-06 | 2.46E-05 | 4.238598 |
| MRGPRF  | -1.67502 | 2.697349 | -4.87476 | 2.23E-06 | 2.46E-05 | 4.248252 |
| PSMB4   | 0.70935  | 7.128553 | 4.871219 | 2.27E-06 | 2.50E-05 | 4.061347 |
| PLCE1   | -1.98141 | 3.850618 | -4.87088 | 2.27E-06 | 2.50E-05 | 4.098441 |
| PDPK1   | -0.66574 | 6.272123 | -4.86994 | 2.28E-06 | 2.51E-05 | 4.055217 |
| VDR     | 1.668863 | 5.731105 | 4.869498 | 2.29E-06 | 2.51E-05 | 4.216992 |
| RFC4    | 1.865335 | 4.40127  | 4.867821 | 2.31E-06 | 2.53E-05 | 4.433468 |
| ZNF853  | -1.76169 | 2.060065 | -4.86684 | 2.32E-06 | 2.54E-05 | 4.298753 |
| SLC30A9 | -0.70999 | 5.862932 | -4.86677 | 2.32E-06 | 2.54E-05 | 4.041932 |

|          |          |          |          |          |          |          |
|----------|----------|----------|----------|----------|----------|----------|
| FBXO5    | 1.286627 | 3.765742 | 4.865839 | 2.33E-06 | 2.55E-05 | 4.436208 |
| WDR75    | 0.626686 | 5.773211 | 4.865756 | 2.33E-06 | 2.55E-05 | 4.095944 |
| DCLRE1B  | 1.143212 | 3.742981 | 4.865404 | 2.33E-06 | 2.55E-05 | 4.421637 |
| FIGNL1   | 1.389626 | 4.539363 | 4.865431 | 2.33E-06 | 2.55E-05 | 4.344806 |
| MDK      | 1.882226 | 6.956092 | 4.864445 | 2.34E-06 | 2.55E-05 | 4.090299 |
| RNF185   | -0.65015 | 5.644899 | -4.86435 | 2.34E-06 | 2.55E-05 | 4.03613  |
| ECHDC3   | -2.42171 | 1.878771 | -4.86312 | 2.35E-06 | 2.56E-05 | 4.231662 |
| BRIX1    | 1.141814 | 5.264591 | 4.863357 | 2.35E-06 | 2.56E-05 | 4.187645 |
| NUP107   | 1.139837 | 5.45513  | 4.863217 | 2.35E-06 | 2.56E-05 | 4.162473 |
| KLHL3    | -1.37807 | 2.218639 | -4.86263 | 2.36E-06 | 2.57E-05 | 4.310819 |
| RHBDP2   | 1.313028 | 6.066459 | 4.861638 | 2.37E-06 | 2.58E-05 | 4.108239 |
| CHRD     | -1.67421 | 1.604012 | -4.86101 | 2.38E-06 | 2.58E-05 | 4.356001 |
| SHC2     | -1.46588 | 2.667239 | -4.8586  | 2.40E-06 | 2.61E-05 | 4.212497 |
| LDB2     | -1.21934 | 2.707933 | -4.85701 | 2.42E-06 | 2.62E-05 | 4.231632 |
| E2F3     | 1.217017 | 4.793959 | 4.855981 | 2.43E-06 | 2.63E-05 | 4.2392   |
| LRRC70   | -1.14969 | 0.57486  | -4.85522 | 2.44E-06 | 2.64E-05 | 4.476752 |
| LAMB3    | 2.233198 | 8.395982 | 4.855093 | 2.44E-06 | 2.64E-05 | 3.99609  |
| NRIP2    | -1.15039 | 1.087173 | -4.85433 | 2.45E-06 | 2.65E-05 | 4.43715  |
| DDX11    | 1.183686 | 5.284475 | 4.851671 | 2.48E-06 | 2.67E-05 | 4.140626 |
| SYBU     | -2.27975 | 3.003358 | -4.85171 | 2.48E-06 | 2.67E-05 | 4.068779 |
| SF3B14   | 0.801043 | 5.961744 | 4.851747 | 2.48E-06 | 2.67E-05 | 4.032898 |
| RUVBL2   | 0.813482 | 6.400806 | 4.851686 | 2.48E-06 | 2.67E-05 | 4.003268 |
| AKAP12   | -2.14637 | 4.873466 | -4.85139 | 2.48E-06 | 2.67E-05 | 3.980698 |
| EFNB1    | 1.70995  | 6.851139 | 4.850925 | 2.49E-06 | 2.68E-05 | 4.026232 |
| SMTN     | -1.33863 | 6.620029 | -4.85047 | 2.49E-06 | 2.68E-05 | 3.986704 |
| MEG3     | -1.71606 | 1.132771 | -4.8483  | 2.52E-06 | 2.70E-05 | 4.359205 |
| GPR172A  | 1.167699 | 6.094128 | 4.847867 | 2.52E-06 | 2.71E-05 | 4.033748 |
| MKI67IP  | 0.917272 | 5.612261 | 4.845232 | 2.55E-06 | 2.74E-05 | 4.045624 |
| CDC25A   | 1.986373 | 3.218155 | 4.843264 | 2.58E-06 | 2.76E-05 | 4.435318 |
| AKAP2    | -1.83312 | 4.430207 | -4.84293 | 2.58E-06 | 2.76E-05 | 3.953254 |
| TOPBP1   | 1.041259 | 6.407192 | 4.840536 | 2.61E-06 | 2.79E-05 | 3.968234 |
| CRADD    | -0.74883 | 2.263291 | -4.83676 | 2.65E-06 | 2.83E-05 | 4.27426  |
| TMEM48   | 1.234541 | 5.068112 | 4.836244 | 2.66E-06 | 2.84E-05 | 4.114331 |
| CKLF     | 1.559107 | 3.777056 | 4.834175 | 2.68E-06 | 2.86E-05 | 4.326485 |
| RAB33B   | -0.69396 | 4.00724  | -4.83315 | 2.70E-06 | 2.87E-05 | 4.01123  |
| KIAA1370 | -0.93111 | 5.074234 | -4.83066 | 2.73E-06 | 2.90E-05 | 3.901836 |
| RAD54B   | 1.761876 | 3.263868 | 4.829243 | 2.74E-06 | 2.92E-05 | 4.36181  |
| CAPZA1   | 0.713748 | 7.319002 | 4.829379 | 2.74E-06 | 2.92E-05 | 3.879237 |
| LRRC17   | -2.11566 | 1.301001 | -4.82761 | 2.76E-06 | 2.94E-05 | 4.203272 |
| OTX1     | 3.235562 | 2.583501 | 4.825938 | 2.78E-06 | 2.96E-05 | 4.38431  |
| PRKDC    | 0.988096 | 8.694648 | 4.825548 | 2.79E-06 | 2.96E-05 | 3.879151 |
| ACOT7    | 1.355355 | 5.659964 | 4.824447 | 2.80E-06 | 2.97E-05 | 3.993998 |
| MGC12982 | 2.410914 | 2.355609 | 4.823789 | 2.81E-06 | 2.98E-05 | 4.383853 |
| ANXA2    | 1.270874 | 9.152313 | 4.823754 | 2.81E-06 | 2.98E-05 | 3.876405 |
| KALRN    | -1.87399 | 4.350361 | -4.82346 | 2.81E-06 | 2.98E-05 | 3.871774 |
| H2AFZ    | 0.947422 | 6.891978 | 4.823308 | 2.82E-06 | 2.98E-05 | 3.864614 |
| UAP1     | -0.81579 | 5.427318 | -4.82137 | 2.84E-06 | 3.00E-05 | 3.852713 |
| ZNF204P  | -1.40855 | 2.554141 | -4.82055 | 2.85E-06 | 3.01E-05 | 4.073537 |
| HMGCL    | -0.79821 | 4.566396 | -4.81933 | 2.87E-06 | 3.03E-05 | 3.891495 |
| MPHOSPH8 | -0.82121 | 5.693047 | -4.81603 | 2.91E-06 | 3.07E-05 | 3.82391  |
| NRM      | 1.587824 | 4.669    | 4.815534 | 2.92E-06 | 3.07E-05 | 4.138663 |
| PRR7     | 2.305338 | 3.584125 | 4.813634 | 2.94E-06 | 3.10E-05 | 4.306175 |
| MAGOH    | 0.934726 | 4.193069 | 4.812754 | 2.95E-06 | 3.11E-05 | 4.108679 |
| C12orf72 | -1.02275 | 0.540938 | -4.81243 | 2.96E-06 | 3.11E-05 | 4.305381 |
| DDX12    | 1.613509 | 3.282757 | 4.811905 | 2.96E-06 | 3.11E-05 | 4.278198 |
| DSCC1    | 1.748008 | 3.504836 | 4.8114   | 2.97E-06 | 3.12E-05 | 4.268297 |
| NUP37    | 1.141203 | 4.250039 | 4.810769 | 2.98E-06 | 3.13E-05 | 4.120321 |
| WDR12    | 0.982791 | 4.485211 | 4.809826 | 2.99E-06 | 3.14E-05 | 4.056986 |

|          |          |          |          |          |          |          |
|----------|----------|----------|----------|----------|----------|----------|
| TTF2     | 1.196748 | 5.086438 | 4.808743 | 3.01E-06 | 3.15E-05 | 3.98767  |
| HIPK3    | -1.0946  | 6.514084 | -4.8078  | 3.02E-06 | 3.16E-05 | 3.79622  |
| ACSL3    | -0.89675 | 6.857689 | -4.80687 | 3.03E-06 | 3.17E-05 | 3.79524  |
| SLC44A2  | -0.99941 | 7.462034 | -4.80575 | 3.05E-06 | 3.18E-05 | 3.80776  |
| FXC1     | -0.74762 | 5.044901 | -4.80514 | 3.06E-06 | 3.19E-05 | 3.800854 |
| PALB2    | 0.924579 | 4.540913 | 4.804595 | 3.06E-06 | 3.20E-05 | 4.016951 |
| WNT3     | 2.157235 | -0.06503 | 4.803734 | 3.07E-06 | 3.21E-05 | 4.286483 |
| SGPL1    | 0.784342 | 6.727127 | 4.803022 | 3.08E-06 | 3.21E-05 | 3.777702 |
| C13orf34 | 1.383424 | 3.893347 | 4.802561 | 3.09E-06 | 3.22E-05 | 4.164283 |
| LDHA     | 1.191244 | 9.826649 | 4.800587 | 3.12E-06 | 3.24E-05 | 3.797738 |
| FOXP3    | 2.937179 | 1.634663 | 4.799136 | 3.14E-06 | 3.26E-05 | 4.270252 |
| ZNF345   | -1.76956 | 0.493932 | -4.7989  | 3.14E-06 | 3.26E-05 | 4.206516 |
| STS      | -1.67582 | 4.33337  | -4.79894 | 3.14E-06 | 3.26E-05 | 3.773115 |
| PART1    | -2.29757 | 0.418056 | -4.79872 | 3.14E-06 | 3.26E-05 | 4.172005 |
| CDCP1    | 1.42091  | 7.349621 | 4.794699 | 3.20E-06 | 3.32E-05 | 3.741817 |
| KLHDC10  | -0.70773 | 5.093009 | -4.79427 | 3.21E-06 | 3.32E-05 | 3.753584 |
| NIPAL3   | -0.79949 | 5.404114 | -4.79138 | 3.25E-06 | 3.36E-05 | 3.725005 |
| PTGS1    | -1.87307 | 4.797419 | -4.78904 | 3.28E-06 | 3.40E-05 | 3.712208 |
| FICD     | -0.98162 | 1.387359 | -4.78783 | 3.30E-06 | 3.41E-05 | 4.143625 |
| EZH1     | -0.79592 | 4.711093 | -4.78485 | 3.35E-06 | 3.45E-05 | 3.732233 |
| WDTC1    | -0.76734 | 6.746879 | -4.78499 | 3.34E-06 | 3.45E-05 | 3.697105 |
| PIGP     | -0.78342 | 3.40438  | -4.7839  | 3.36E-06 | 3.46E-05 | 3.867256 |
| C1orf69  | -0.71745 | 3.624641 | -4.7839  | 3.36E-06 | 3.46E-05 | 3.843868 |
| ZNF71    | -1.56501 | 1.606865 | -4.77821 | 3.45E-06 | 3.55E-05 | 4.015212 |
| SLC9A3   | -3.31024 | 2.893278 | -4.7773  | 3.46E-06 | 3.56E-05 | 3.707746 |
| CLDN1    | 3.653584 | 7.145088 | 4.773467 | 3.52E-06 | 3.62E-05 | 3.875946 |
| SMC2     | 1.079512 | 6.020188 | 4.7734   | 3.52E-06 | 3.62E-05 | 3.713605 |
| SLC25A23 | -1.28615 | 6.388195 | -4.77298 | 3.53E-06 | 3.62E-05 | 3.648208 |
| IRAK1    | 0.925504 | 7.524887 | 4.770859 | 3.56E-06 | 3.65E-05 | 3.62844  |
| PRKAB2   | -0.91643 | 5.34765  | -4.76883 | 3.59E-06 | 3.68E-05 | 3.627521 |
| ZNF287   | -1.679   | 1.009581 | -4.76797 | 3.61E-06 | 3.69E-05 | 4.034541 |
| KIAA1958 | -1.21069 | 2.751951 | -4.7673  | 3.62E-06 | 3.70E-05 | 3.845314 |
| SRPK1    | 0.842869 | 6.818338 | 4.766144 | 3.64E-06 | 3.72E-05 | 3.618741 |
| CLN6     | 1.040361 | 5.545882 | 4.764704 | 3.66E-06 | 3.74E-05 | 3.719709 |
| MCM8     | 1.357966 | 4.676814 | 4.764371 | 3.66E-06 | 3.74E-05 | 3.889306 |
| CPSF3    | 0.810878 | 5.448352 | 4.762984 | 3.69E-06 | 3.76E-05 | 3.700084 |
| BANF1    | 1.020128 | 6.577938 | 4.762856 | 3.69E-06 | 3.76E-05 | 3.622966 |
| ESM1     | 3.859618 | 2.009398 | 4.760564 | 3.73E-06 | 3.80E-05 | 4.114461 |
| DCAF15   | 0.845546 | 4.968155 | 4.760647 | 3.73E-06 | 3.80E-05 | 3.751221 |
| ARL1     | -0.58616 | 6.364164 | -4.75883 | 3.76E-06 | 3.82E-05 | 3.577559 |
| BGN      | 1.961774 | 8.242536 | 4.758465 | 3.76E-06 | 3.83E-05 | 3.579106 |
| C9orf103 | -1.0608  | 1.256715 | -4.75425 | 3.83E-06 | 3.90E-05 | 4.007894 |
| SERHL2   | -1.00429 | 0.369989 | -4.75378 | 3.84E-06 | 3.90E-05 | 4.070725 |
| HBA2     | -2.18977 | 3.054198 | -4.75389 | 3.84E-06 | 3.90E-05 | 3.651045 |
| AIMP2    | 1.175138 | 4.43224  | 4.749698 | 3.91E-06 | 3.97E-05 | 3.837726 |
| SNRPE    | 1.013523 | 4.538991 | 4.745446 | 3.99E-06 | 4.04E-05 | 3.779253 |
| PPM1L    | -1.42584 | 2.857624 | -4.74477 | 4.00E-06 | 4.04E-05 | 3.701531 |
| EVI5     | -0.77081 | 4.9494   | -4.74491 | 4.00E-06 | 4.04E-05 | 3.548033 |
| COX6B2   | 3.261135 | 0.185372 | 4.742088 | 4.05E-06 | 4.09E-05 | 4.037944 |
| TXNDC15  | -0.70789 | 4.74831  | -4.74105 | 4.06E-06 | 4.11E-05 | 3.548498 |
| PTGER2   | -2.03335 | 1.587043 | -4.74073 | 4.07E-06 | 4.11E-05 | 3.805774 |
| IGFBP5   | -2.2969  | 7.941503 | -4.74013 | 4.08E-06 | 4.12E-05 | 3.575559 |
| PAQR4    | 1.462395 | 5.276145 | 4.739454 | 4.09E-06 | 4.13E-05 | 3.704027 |
| PRMT10   | -0.7117  | 3.069524 | -4.73926 | 4.10E-06 | 4.13E-05 | 3.741641 |
| C21orf45 | 1.338781 | 3.256903 | 4.738786 | 4.11E-06 | 4.13E-05 | 3.953872 |
| SGCD     | -1.84131 | 2.900475 | -4.73884 | 4.10E-06 | 4.13E-05 | 3.626958 |
| AASS     | -1.33946 | 3.48361  | -4.73766 | 4.13E-06 | 4.15E-05 | 3.602109 |
| VLDLR    | -1.97145 | 3.762586 | -4.7371  | 4.14E-06 | 4.15E-05 | 3.530918 |

|           |          |          |          |          |          |          |
|-----------|----------|----------|----------|----------|----------|----------|
| ATIC      | 0.914292 | 6.190905 | 4.736513 | 4.15E-06 | 4.16E-05 | 3.530067 |
| USP54     | -1.29782 | 5.961187 | -4.73623 | 4.15E-06 | 4.16E-05 | 3.485465 |
| BCHE      | -2.63339 | 0.445458 | -4.73541 | 4.17E-06 | 4.18E-05 | 3.865642 |
| C5orf34   | 1.890759 | 1.673851 | 4.733296 | 4.21E-06 | 4.21E-05 | 4.012837 |
| FBXL7     | -1.37397 | 3.123645 | -4.73327 | 4.21E-06 | 4.21E-05 | 3.621219 |
| TTC3      | -0.90904 | 7.329667 | -4.73311 | 4.21E-06 | 4.21E-05 | 3.491934 |
| R3HCC1    | -0.73085 | 4.209633 | -4.73268 | 4.22E-06 | 4.22E-05 | 3.558485 |
| ISOC1     | -0.73408 | 4.62103  | -4.73034 | 4.26E-06 | 4.26E-05 | 3.511155 |
| LEPROT    | -0.78687 | 4.886673 | -4.72904 | 4.29E-06 | 4.28E-05 | 3.483557 |
| NDFIP1    | -0.57126 | 6.81032  | -4.72901 | 4.29E-06 | 4.28E-05 | 3.456709 |
| AFF1      | -0.92906 | 6.594567 | -4.72796 | 4.31E-06 | 4.29E-05 | 3.454251 |
| DCAF11    | -0.65855 | 6.181547 | -4.72741 | 4.32E-06 | 4.30E-05 | 3.443418 |
| AFF4      | -0.89863 | 7.339054 | -4.72719 | 4.32E-06 | 4.30E-05 | 3.466802 |
| LOC286367 | -1.325   | 0.318718 | -4.72544 | 4.36E-06 | 4.33E-05 | 3.940433 |
| C2orf7    | -0.79221 | 2.874216 | -4.72451 | 4.37E-06 | 4.35E-05 | 3.700375 |
| RELT      | 1.550355 | 3.519859 | 4.722432 | 4.41E-06 | 4.38E-05 | 3.879109 |
| PSME2     | 1.214446 | 5.707324 | 4.722158 | 4.42E-06 | 4.38E-05 | 3.53904  |
| SLC2A1    | 2.45629  | 8.354999 | 4.721991 | 4.42E-06 | 4.39E-05 | 3.432573 |
| ZNF404    | -1.35557 | 0.452703 | -4.72181 | 4.43E-06 | 4.39E-05 | 3.915636 |
| CSTF2     | 1.040624 | 4.444234 | 4.721282 | 4.44E-06 | 4.39E-05 | 3.696077 |
| IGF1      | -2.10866 | 2.764956 | -4.72104 | 4.44E-06 | 4.39E-05 | 3.543459 |
| XK        | -2.27639 | 3.262232 | -4.72105 | 4.44E-06 | 4.39E-05 | 3.486689 |
| NHSL2     | -1.69581 | 0.654702 | -4.71853 | 4.49E-06 | 4.43E-05 | 3.86228  |
| UTP6      | 0.618141 | 5.240927 | 4.71849  | 4.49E-06 | 4.43E-05 | 3.514792 |
| RBPMS     | -1.48088 | 5.548518 | -4.71786 | 4.50E-06 | 4.44E-05 | 3.405839 |
| C8orf76   | 0.97545  | 4.234657 | 4.715479 | 4.55E-06 | 4.49E-05 | 3.697723 |
| SPARCL1   | -2.08471 | 6.857064 | -4.71543 | 4.55E-06 | 4.49E-05 | 3.434472 |
| PYCARD    | 1.837597 | 5.125839 | 4.714453 | 4.57E-06 | 4.50E-05 | 3.677419 |
| NDRG2     | -1.64601 | 5.062307 | -4.71231 | 4.62E-06 | 4.54E-05 | 3.38364  |
| PPM1G     | 0.687002 | 7.156502 | 4.710304 | 4.66E-06 | 4.58E-05 | 3.371684 |
| C11orf54  | -1.05526 | 4.159586 | -4.70865 | 4.69E-06 | 4.61E-05 | 3.436249 |
| DCUN1D4   | -0.75272 | 4.848695 | -4.70713 | 4.72E-06 | 4.64E-05 | 3.395207 |
| ZNF880    | -1.89332 | 0.604386 | -4.70622 | 4.74E-06 | 4.65E-05 | 3.800825 |
| PAFAH2    | -1.03762 | 4.425207 | -4.70502 | 4.77E-06 | 4.67E-05 | 3.400181 |
| FBXL22    | -1.2506  | 0.153008 | -4.70307 | 4.81E-06 | 4.71E-05 | 3.8613   |
| AKR7A3    | -2.98656 | 1.815635 | -4.70275 | 4.81E-06 | 4.71E-05 | 3.507208 |
| C10orf32  | -0.80218 | 4.105341 | -4.70047 | 4.86E-06 | 4.75E-05 | 3.426626 |
| PHKA1     | -0.952   | 4.329761 | -4.70045 | 4.86E-06 | 4.75E-05 | 3.393829 |
| LIMK1     | 1.104545 | 6.098418 | 4.699736 | 4.88E-06 | 4.77E-05 | 3.396305 |
| SDC1      | 2.025857 | 8.888217 | 4.699273 | 4.89E-06 | 4.77E-05 | 3.328758 |
| IL11      | 3.254018 | 0.886448 | 4.699114 | 4.89E-06 | 4.77E-05 | 3.866626 |
| ZNF649    | -1.3722  | 2.386213 | -4.69797 | 4.92E-06 | 4.79E-05 | 3.584306 |
| FNIP2     | -1.31675 | 5.193762 | -4.69704 | 4.94E-06 | 4.81E-05 | 3.319894 |
| ENPP5     | -2.36795 | 1.476791 | -4.69652 | 4.95E-06 | 4.82E-05 | 3.591091 |
| AKAP10    | -0.60014 | 4.440654 | -4.69604 | 4.96E-06 | 4.82E-05 | 3.392199 |
| SPATA18   | -1.35766 | 2.406414 | -4.69436 | 4.99E-06 | 4.86E-05 | 3.571297 |
| DNAJB11   | 0.847372 | 6.091972 | 4.688674 | 5.12E-06 | 4.98E-05 | 3.33098  |
| C17orf51  | -1.26648 | 3.142318 | -4.68846 | 5.13E-06 | 4.98E-05 | 3.442977 |
| HYAL1     | -1.84103 | 2.918036 | -4.68744 | 5.15E-06 | 5.00E-05 | 3.413212 |
| SH2D2A    | 2.042156 | 2.52367  | 4.685449 | 5.19E-06 | 5.04E-05 | 3.812226 |
| MARCKSL1  | 1.545657 | 7.216252 | 4.684621 | 5.21E-06 | 5.05E-05 | 3.284982 |
| PEX19     | -0.59492 | 6.090013 | -4.68408 | 5.23E-06 | 5.06E-05 | 3.260378 |
| SNRPD2    | 0.859807 | 6.534264 | 4.683271 | 5.24E-06 | 5.07E-05 | 3.280255 |
| ACAD8     | -0.87088 | 3.804295 | -4.6815  | 5.29E-06 | 5.11E-05 | 3.373602 |
| FAM20A    | -1.73565 | 2.247903 | -4.67968 | 5.33E-06 | 5.15E-05 | 3.484519 |
| CALM1     | -0.77811 | 8.703574 | -4.67933 | 5.34E-06 | 5.15E-05 | 3.30178  |
| TSC1      | -0.6365  | 5.579353 | -4.67771 | 5.37E-06 | 5.19E-05 | 3.241474 |
| CTDSP1    | -0.59385 | 6.713839 | -4.67739 | 5.38E-06 | 5.19E-05 | 3.237599 |

|              |          |          |          |          |          |          |
|--------------|----------|----------|----------|----------|----------|----------|
| ZNF862       | -1.23362 | 4.025784 | -4.67647 | 5.40E-06 | 5.21E-05 | 3.299013 |
| PEX7         | -0.92431 | 2.756591 | -4.67463 | 5.45E-06 | 5.25E-05 | 3.494591 |
| ANKAR        | -0.99229 | 0.989993 | -4.67211 | 5.51E-06 | 5.30E-05 | 3.694802 |
| SULF2        | 1.582667 | 7.544931 | 4.665184 | 5.68E-06 | 5.46E-05 | 3.19154  |
| LOC100125556 | 1.751675 | 1.863116 | 4.663622 | 5.72E-06 | 5.49E-05 | 3.731128 |
| SOX17        | -1.38579 | 0.940518 | -4.66385 | 5.71E-06 | 5.49E-05 | 3.634703 |
| BEX4         | -1.64874 | 3.03718  | -4.66366 | 5.72E-06 | 5.49E-05 | 3.311866 |
| ACCS         | -0.99762 | 2.84596  | -4.66141 | 5.77E-06 | 5.54E-05 | 3.411961 |
| PLAU         | 2.621027 | 6.468177 | 4.661119 | 5.78E-06 | 5.54E-05 | 3.35482  |
| TMEM70       | -0.69251 | 4.565023 | -4.66054 | 5.79E-06 | 5.55E-05 | 3.225281 |
| MDFI         | 2.882789 | 4.804583 | 4.659654 | 5.82E-06 | 5.57E-05 | 3.614933 |
| TUBA8        | -1.08361 | 1.011993 | -4.65939 | 5.82E-06 | 5.57E-05 | 3.633908 |
| RNF146       | -0.6586  | 4.229321 | -4.65798 | 5.86E-06 | 5.60E-05 | 3.247986 |
| IFI30        | 1.440345 | 6.773778 | 4.656809 | 5.89E-06 | 5.62E-05 | 3.188398 |
| PPAP2A       | -1.0924  | 4.736358 | -4.65694 | 5.89E-06 | 5.62E-05 | 3.173748 |
| FAM13AOS     | -1.24713 | 1.093416 | -4.65641 | 5.90E-06 | 5.63E-05 | 3.603218 |
| DSTN         | -0.94548 | 8.432383 | -4.6547  | 5.94E-06 | 5.66E-05 | 3.194933 |
| RNF10        | -0.60735 | 7.620242 | -4.65306 | 5.99E-06 | 5.70E-05 | 3.155237 |
| NPM3         | 1.56554  | 2.981382 | 4.652576 | 6.00E-06 | 5.71E-05 | 3.635594 |
| DHRS12       | -0.90509 | 2.29992  | -4.65266 | 6.00E-06 | 5.71E-05 | 3.47605  |
| EMCN         | -1.42062 | 2.657029 | -4.64992 | 6.07E-06 | 5.77E-05 | 3.334868 |
| ZBTB40       | -0.64066 | 5.415826 | -4.64893 | 6.10E-06 | 5.79E-05 | 3.126205 |
| GAB2         | -1.32054 | 4.457717 | -4.6487  | 6.10E-06 | 5.79E-05 | 3.145082 |
| PPP1R16B     | -1.53622 | 3.127368 | -4.64718 | 6.14E-06 | 5.83E-05 | 3.245013 |
| SEMA3B       | -2.08529 | 4.061969 | -4.64646 | 6.16E-06 | 5.84E-05 | 3.127576 |
| TFAP4        | 1.240597 | 4.227307 | 4.645822 | 6.18E-06 | 5.85E-05 | 3.445712 |
| EML1         | -1.4992  | 3.934057 | -4.64592 | 6.18E-06 | 5.85E-05 | 3.160306 |
| TXNRD2       | -0.74587 | 3.815484 | -4.64419 | 6.22E-06 | 5.88E-05 | 3.228754 |
| HIPK2        | -1.25592 | 7.126216 | -4.64411 | 6.23E-06 | 5.88E-05 | 3.120488 |
| PIK3R1       | -1.17437 | 5.835773 | -4.64275 | 6.26E-06 | 5.92E-05 | 3.089081 |
| C6orf89      | -0.6624  | 6.643181 | -4.64146 | 6.30E-06 | 5.95E-05 | 3.086972 |
| SIP1         | 1.078883 | 2.443856 | 4.640282 | 6.33E-06 | 5.97E-05 | 3.591945 |
| C1orf183     | -1.09196 | 1.08533  | -4.63978 | 6.34E-06 | 5.98E-05 | 3.545827 |
| NUDT5        | 1.094955 | 5.231046 | 4.638684 | 6.37E-06 | 6.01E-05 | 3.233913 |
| RAB5B        | -0.62922 | 7.484207 | -4.63678 | 6.43E-06 | 6.05E-05 | 3.084136 |
| EIF2AK3      | -0.84938 | 5.483928 | -4.6346  | 6.49E-06 | 6.11E-05 | 3.059037 |
| AAK1         | -0.79269 | 6.595123 | -4.63251 | 6.55E-06 | 6.16E-05 | 3.050869 |
| TFF1         | -4.37217 | 1.214109 | -4.63047 | 6.61E-06 | 6.21E-05 | 3.170878 |
| RUNDC2C      | -1.30205 | 0.585783 | -4.62968 | 6.63E-06 | 6.22E-05 | 3.531891 |
| PARP9        | 1.124577 | 6.703184 | 4.629066 | 6.65E-06 | 6.24E-05 | 3.057793 |
| ZNF367       | 1.681484 | 4.114281 | 4.627108 | 6.70E-06 | 6.29E-05 | 3.437361 |
| BTG2         | -1.62423 | 6.685563 | -4.62554 | 6.75E-06 | 6.33E-05 | 3.040297 |
| PUS7         | 1.321352 | 5.068738 | 4.62368  | 6.80E-06 | 6.37E-05 | 3.229201 |
| APEX2        | 0.85597  | 5.3786   | 4.619366 | 6.93E-06 | 6.49E-05 | 3.108165 |
| LRP8         | 2.908692 | 4.32888  | 4.618428 | 6.96E-06 | 6.51E-05 | 3.487425 |
| ZNF207       | 0.431703 | 7.667659 | 4.615917 | 7.04E-06 | 6.58E-05 | 2.981312 |
| CCDC106      | -1.26344 | 2.788191 | -4.61484 | 7.07E-06 | 6.60E-05 | 3.187523 |
| C14orf106    | 0.958157 | 5.067012 | 4.614717 | 7.08E-06 | 6.60E-05 | 3.140717 |
| LMBRD1       | -0.7996  | 5.452402 | -4.61077 | 7.20E-06 | 6.71E-05 | 2.961693 |
| BTBD3        | -1.19181 | 5.733114 | -4.6063  | 7.34E-06 | 6.84E-05 | 2.936803 |
| CLCC1        | -0.66796 | 5.184571 | -4.60583 | 7.35E-06 | 6.85E-05 | 2.955862 |
| DEXI         | -0.70037 | 4.455767 | -4.60132 | 7.50E-06 | 6.98E-05 | 2.987232 |
| MLL3         | -0.84637 | 7.051717 | -4.60087 | 7.51E-06 | 6.99E-05 | 2.929053 |
| CDH3         | 4.219092 | 6.890395 | 4.599266 | 7.57E-06 | 7.03E-05 | 3.272388 |
| AMMECR1      | 1.199843 | 5.490029 | 4.599276 | 7.57E-06 | 7.03E-05 | 3.048581 |
| STBD1        | -1.261   | 3.466256 | -4.59907 | 7.57E-06 | 7.03E-05 | 3.031602 |
| BTC          | -1.81474 | 0.173774 | -4.59655 | 7.66E-06 | 7.10E-05 | 3.393218 |
| NKIRAS1      | -0.68321 | 2.806619 | -4.59565 | 7.69E-06 | 7.12E-05 | 3.189131 |

|           |          |          |          |          |          |          |
|-----------|----------|----------|----------|----------|----------|----------|
| RASSF3    | -1.2037  | 3.547359 | -4.59553 | 7.69E-06 | 7.12E-05 | 3.013956 |
| NUTF2     | 0.853576 | 6.288508 | 4.595724 | 7.68E-06 | 7.12E-05 | 2.929017 |
| PKIB      | -2.02503 | 1.49153  | -4.59338 | 7.76E-06 | 7.18E-05 | 3.210391 |
| RNPS1     | 0.658927 | 7.178273 | 4.591477 | 7.83E-06 | 7.24E-05 | 2.874224 |
| WBP1      | -0.64314 | 4.862425 | -4.59127 | 7.83E-06 | 7.24E-05 | 2.916728 |
| DAZAP1    | 0.567991 | 6.537844 | 4.589302 | 7.90E-06 | 7.29E-05 | 2.8764   |
| NLGN3     | -1.43873 | 0.372458 | -4.58829 | 7.93E-06 | 7.32E-05 | 3.369754 |
| PPP3CB    | -0.61248 | 5.543286 | -4.58753 | 7.96E-06 | 7.34E-05 | 2.86719  |
| POLL      | -0.61193 | 4.131039 | -4.5872  | 7.97E-06 | 7.35E-05 | 2.96915  |
| BOLA2     | 1.063614 | 5.709141 | 4.583551 | 8.10E-06 | 7.46E-05 | 2.945375 |
| PSMA6     | 0.828869 | 6.129837 | 4.581955 | 8.15E-06 | 7.51E-05 | 2.881739 |
| UTP18     | 0.770734 | 4.983979 | 4.581412 | 8.17E-06 | 7.52E-05 | 2.989882 |
| BOC       | -1.87109 | 3.405954 | -4.5812  | 8.18E-06 | 7.52E-05 | 2.91263  |
| LRRFIP2   | -0.76122 | 5.308421 | -4.58115 | 8.18E-06 | 7.52E-05 | 2.844802 |
| HOXA13    | 5.319782 | 0.933404 | 4.580055 | 8.22E-06 | 7.55E-05 | 3.396057 |
| TXNDC9    | 0.690483 | 5.02001  | 4.578761 | 8.27E-06 | 7.58E-05 | 2.964499 |
| C10orf55  | 2.536468 | 0.122593 | 4.577566 | 8.31E-06 | 7.62E-05 | 3.385538 |
| CBX8      | 1.18197  | 2.184095 | 4.577007 | 8.33E-06 | 7.63E-05 | 3.3573   |
| CLEC5A    | 2.711742 | 1.030823 | 4.574728 | 8.41E-06 | 7.70E-05 | 3.375186 |
| RPA3      | 1.236016 | 4.17679  | 4.573667 | 8.45E-06 | 7.73E-05 | 3.155962 |
| SURF1     | -0.73138 | 4.480083 | -4.57166 | 8.53E-06 | 7.80E-05 | 2.860708 |
| MASTL     | 1.103568 | 4.604623 | 4.570029 | 8.59E-06 | 7.85E-05 | 3.053465 |
| PPIL5     | 1.013073 | 3.408469 | 4.569795 | 8.59E-06 | 7.85E-05 | 3.214924 |
| TRMT6     | 0.948629 | 4.455771 | 4.568903 | 8.63E-06 | 7.87E-05 | 3.04881  |
| GNPDA1    | 0.806505 | 5.226808 | 4.568235 | 8.65E-06 | 7.89E-05 | 2.908842 |
| WDR34     | 1.128069 | 5.693788 | 4.568061 | 8.66E-06 | 7.89E-05 | 2.889374 |
| EIF2AK2   | 1.088956 | 5.620377 | 4.567329 | 8.69E-06 | 7.91E-05 | 2.890403 |
| DPH3      | -0.73388 | 4.740876 | -4.56687 | 8.70E-06 | 7.92E-05 | 2.819088 |
| SPOP      | -0.59167 | 5.403373 | -4.56644 | 8.72E-06 | 7.93E-05 | 2.785859 |
| ADARB1    | -1.25768 | 4.173979 | -4.56613 | 8.73E-06 | 7.94E-05 | 2.825555 |
| TBL1XR1   | 0.863411 | 7.95717  | 4.56517  | 8.77E-06 | 7.96E-05 | 2.769937 |
| BCKDHA    | -0.89072 | 5.387002 | -4.56375 | 8.82E-06 | 8.01E-05 | 2.766987 |
| TLN1      | -0.97932 | 9.010698 | -4.56249 | 8.87E-06 | 8.05E-05 | 2.830256 |
| NEDD4L    | -1.37932 | 6.360973 | -4.56181 | 8.89E-06 | 8.06E-05 | 2.763759 |
| LOC643008 | -1.95169 | 0.935164 | -4.56097 | 8.93E-06 | 8.08E-05 | 3.162999 |
| CRLF3     | 0.845866 | 4.588044 | 4.560969 | 8.93E-06 | 8.08E-05 | 2.978102 |
| ASB8      | -0.67021 | 4.466447 | -4.56107 | 8.92E-06 | 8.08E-05 | 2.82243  |
| SLC5A12   | 4.03175  | 0.738578 | 4.560255 | 8.95E-06 | 8.10E-05 | 3.318524 |
| TMEM201   | 0.927134 | 5.457047 | 4.559597 | 8.98E-06 | 8.12E-05 | 2.859607 |
| C20orf24  | 1.039907 | 6.773584 | 4.558544 | 9.02E-06 | 8.15E-05 | 2.757985 |
| E2F8      | 2.365725 | 3.980702 | 4.558249 | 9.03E-06 | 8.15E-05 | 3.234191 |
| TFDP1     | 0.93266  | 6.90311  | 4.554874 | 9.16E-06 | 8.27E-05 | 2.733759 |
| TSPAN2    | -1.68303 | 2.08813  | -4.5543  | 9.19E-06 | 8.28E-05 | 2.99371  |
| WDR60     | -0.88914 | 4.291286 | -4.55386 | 9.20E-06 | 8.29E-05 | 2.791676 |
| NCL       | 0.666896 | 8.924475 | 4.553108 | 9.23E-06 | 8.31E-05 | 2.745605 |
| CACNA1C   | -1.53031 | 3.361163 | -4.55121 | 9.31E-06 | 8.38E-05 | 2.821398 |
| CALR      | 0.582301 | 9.386096 | 4.550959 | 9.32E-06 | 8.38E-05 | 2.752974 |
| POPDC2    | -1.41483 | 0.060777 | -4.54985 | 9.36E-06 | 8.41E-05 | 3.237219 |
| ABCA3     | -1.94768 | 3.225043 | -4.54846 | 9.42E-06 | 8.46E-05 | 2.791097 |
| ZNF577    | -1.49831 | 1.646526 | -4.5458  | 9.53E-06 | 8.55E-05 | 3.056074 |
| WDR13     | -0.76824 | 5.546686 | -4.5457  | 9.53E-06 | 8.55E-05 | 2.691134 |
| PPARGC1A  | -2.22881 | 2.702365 | -4.53721 | 9.89E-06 | 8.86E-05 | 2.778988 |
| PSD       | -1.7306  | 0.505255 | -4.53683 | 9.90E-06 | 8.87E-05 | 3.129979 |
| ARHGAP20  | -1.65881 | 0.899761 | -4.53655 | 9.92E-06 | 8.87E-05 | 3.095627 |
| MRPL9     | 0.749305 | 5.250032 | 4.535985 | 9.94E-06 | 8.89E-05 | 2.768144 |
| CHP       | -0.91655 | 7.330029 | -4.53557 | 9.96E-06 | 8.90E-05 | 2.668549 |
| KLHDC7A   | -2.96569 | -0.08487 | -4.5326  | 1.01E-05 | 9.01E-05 | 3.070389 |
| CHRM3     | -1.68468 | 2.677907 | -4.52992 | 1.02E-05 | 9.10E-05 | 2.804398 |

|          |          |          |          |          |          |          |
|----------|----------|----------|----------|----------|----------|----------|
| SH2B1    | -0.60981 | 5.106172 | -4.52991 | 1.02E-05 | 9.10E-05 | 2.649951 |
| NUDCD1   | 0.986947 | 4.731273 | 4.529672 | 1.02E-05 | 9.11E-05 | 2.848804 |
| MEST     | 2.305589 | 5.463897 | 4.529402 | 1.02E-05 | 9.11E-05 | 2.930766 |
| FNBP1    | -1.46062 | 5.530539 | -4.52932 | 1.02E-05 | 9.11E-05 | 2.620692 |
| ZC4H2    | -1.61846 | 2.040171 | -4.52836 | 1.03E-05 | 9.14E-05 | 2.908282 |
| HINT3    | -0.80849 | 4.938648 | -4.5283  | 1.03E-05 | 9.14E-05 | 2.64339  |
| S100A1   | -1.56577 | 0.343604 | -4.52807 | 1.03E-05 | 9.14E-05 | 3.122742 |
| MYH11    | -4.3171  | 7.507395 | -4.52731 | 1.03E-05 | 9.16E-05 | 2.731363 |
| PFDN4    | 1.072034 | 4.144583 | 4.525674 | 1.04E-05 | 9.22E-05 | 2.941425 |
| ZFP3     | -1.65886 | 2.664303 | -4.52554 | 1.04E-05 | 9.22E-05 | 2.789352 |
| DLG4     | -1.08146 | 2.478281 | -4.52471 | 1.04E-05 | 9.25E-05 | 2.896597 |
| ARIH2    | -0.61688 | 5.677354 | -4.52362 | 1.05E-05 | 9.29E-05 | 2.600383 |
| PAFAH1B3 | 1.441822 | 4.505343 | 4.522068 | 1.06E-05 | 9.34E-05 | 2.925198 |
| GPRIN1   | 2.393902 | 4.195148 | 4.520105 | 1.06E-05 | 9.41E-05 | 3.063177 |
| SRRT     | 0.553601 | 6.36444  | 4.520041 | 1.06E-05 | 9.41E-05 | 2.597962 |
| SPCS3    | -0.69307 | 7.055784 | -4.51939 | 1.07E-05 | 9.43E-05 | 2.590695 |
| IDH2     | -1.24411 | 6.801662 | -4.51923 | 1.07E-05 | 9.43E-05 | 2.59575  |
| VEGFB    | -0.88452 | 5.485785 | -4.519   | 1.07E-05 | 9.44E-05 | 2.580956 |
| MSRA     | -1.13931 | 2.743766 | -4.51764 | 1.08E-05 | 9.48E-05 | 2.816421 |
| ST14     | 1.540555 | 7.964501 | 4.513109 | 1.10E-05 | 9.66E-05 | 2.553461 |
| CACYBP   | 0.843987 | 5.679331 | 4.512796 | 1.10E-05 | 9.67E-05 | 2.637699 |
| DCTPP1   | 1.009589 | 5.250854 | 4.511953 | 1.10E-05 | 9.70E-05 | 2.699285 |
| TRIM14   | 1.081928 | 6.236208 | 4.510058 | 1.11E-05 | 9.77E-05 | 2.596678 |
| C15orf52 | -1.54421 | 3.570021 | -4.5097  | 1.11E-05 | 9.78E-05 | 2.629397 |
| RIMBP2   | -2.49867 | 0.554824 | -4.50806 | 1.12E-05 | 9.84E-05 | 2.936756 |
| PPIL1    | 0.889309 | 5.177421 | 4.507012 | 1.13E-05 | 9.88E-05 | 2.67397  |
| MXD4     | -0.91269 | 5.648089 | -4.50693 | 1.13E-05 | 9.88E-05 | 2.528443 |
| SNX10    | 2.58412  | 4.391551 | 4.504864 | 1.14E-05 | 9.95E-05 | 3.00006  |
| SASS6    | 1.220184 | 3.704319 | 4.505002 | 1.13E-05 | 9.95E-05 | 2.940396 |
| CSDE1    | -0.70596 | 8.910761 | -4.50335 | 1.14E-05 | 0.0001   | 2.5782   |
| PSRC1    | 1.698823 | 2.771117 | 4.501039 | 1.15E-05 | 0.000101 | 3.047226 |
| C3orf19  | -0.62878 | 3.849576 | -4.49935 | 1.16E-05 | 0.000102 | 2.640263 |
| ODF2     | 0.761417 | 5.427437 | 4.49846  | 1.17E-05 | 0.000102 | 2.59736  |
| WNT2     | 3.518731 | 1.170836 | 4.497915 | 1.17E-05 | 0.000102 | 3.076971 |
| NAP1L5   | -1.28022 | 1.679399 | -4.49666 | 1.18E-05 | 0.000103 | 2.879907 |
| C12orf32 | 1.048726 | 4.917819 | 4.493887 | 1.19E-05 | 0.000104 | 2.681402 |
| SPINT1   | 1.436693 | 7.890444 | 4.49226  | 1.20E-05 | 0.000105 | 2.468161 |
| ALDH1L1  | -2.55939 | 1.026359 | -4.49156 | 1.20E-05 | 0.000105 | 2.790996 |
| DGUOK    | 0.800412 | 4.988737 | 4.491196 | 1.20E-05 | 0.000105 | 2.624434 |
| HSPB8    | -2.4844  | 4.459454 | -4.4908  | 1.21E-05 | 0.000105 | 2.470358 |
| TACC1    | -1.39979 | 7.1274   | -4.49011 | 1.21E-05 | 0.000105 | 2.489705 |
| BAZ1A    | 0.842795 | 6.957896 | 4.488706 | 1.22E-05 | 0.000106 | 2.459068 |
| MEGF8    | -1.01976 | 5.838674 | -4.48864 | 1.22E-05 | 0.000106 | 2.452762 |
| ATG4A    | -0.77147 | 3.779032 | -4.48762 | 1.22E-05 | 0.000106 | 2.587079 |
| FAM46C   | -1.99619 | 3.678269 | -4.48709 | 1.22E-05 | 0.000106 | 2.498038 |
| MRPL47   | 0.927737 | 5.211239 | 4.486682 | 1.23E-05 | 0.000106 | 2.591457 |
| SCAPER   | -0.81047 | 4.423298 | -4.4858  | 1.23E-05 | 0.000107 | 2.508408 |
| UNC13B   | -1.40577 | 5.613309 | -4.48548 | 1.23E-05 | 0.000107 | 2.441805 |
| DPP3     | 0.844888 | 6.098637 | 4.484433 | 1.24E-05 | 0.000107 | 2.486164 |
| TNFSF10  | 1.982923 | 6.516247 | 4.480343 | 1.26E-05 | 0.000109 | 2.528487 |
| C11orf46 | -0.6461  | 3.848073 | -4.47994 | 1.26E-05 | 0.000109 | 2.559212 |
| COL4A4   | -2.10988 | 1.553025 | -4.47948 | 1.27E-05 | 0.000109 | 2.721232 |
| DBF4B    | 1.248289 | 3.781438 | 4.47932  | 1.27E-05 | 0.000109 | 2.830891 |
| TBRG1    | -0.75083 | 5.179232 | -4.47881 | 1.27E-05 | 0.000109 | 2.431632 |
| POU2F1   | 0.740863 | 4.568276 | 4.474991 | 1.29E-05 | 0.000111 | 2.616784 |
| KIF5C    | -1.75934 | 0.429809 | -4.47306 | 1.30E-05 | 0.000112 | 2.881153 |
| S100A3   | 2.391607 | 0.85964  | 4.472257 | 1.30E-05 | 0.000112 | 2.978057 |
| TMEM143  | -0.74269 | 2.920819 | -4.47157 | 1.31E-05 | 0.000113 | 2.65909  |



|          |          |          |          |          |          |          |
|----------|----------|----------|----------|----------|----------|----------|
| COQ7     | -0.63997 | 3.826259 | -4.47116 | 1.31E-05 | 0.000113 | 2.527417 |
| TMEM50B  | -0.81586 | 5.121527 | -4.46981 | 1.32E-05 | 0.000113 | 2.39533  |
| ADAMTS13 | -1.40926 | 1.391245 | -4.46924 | 1.32E-05 | 0.000114 | 2.795928 |
| FBL      | 0.869115 | 6.774006 | 4.468463 | 1.33E-05 | 0.000114 | 2.383484 |
| CD300LF  | 2.109433 | 0.170702 | 4.467979 | 1.33E-05 | 0.000114 | 2.961275 |
| DONSON   | 1.033025 | 3.963305 | 4.466384 | 1.34E-05 | 0.000115 | 2.725484 |
| KLHL15   | -0.93702 | 4.105287 | -4.46466 | 1.35E-05 | 0.000115 | 2.441768 |
| FAM149B1 | -0.56955 | 4.00035  | -4.46323 | 1.36E-05 | 0.000116 | 2.481685 |
| WDR7     | -0.77328 | 4.6447   | -4.46289 | 1.36E-05 | 0.000116 | 2.399477 |
| CPA3     | -1.85347 | 2.371702 | -4.46173 | 1.36E-05 | 0.000117 | 2.552058 |
| STIP1    | 0.784458 | 7.313564 | 4.461754 | 1.36E-05 | 0.000117 | 2.343301 |
| COX7A1   | -1.27442 | 1.140399 | -4.46095 | 1.37E-05 | 0.000117 | 2.802591 |
| F2RL3    | -1.49179 | 2.264586 | -4.45903 | 1.38E-05 | 0.000118 | 2.611994 |
| CPEB2    | -1.19903 | 4.943865 | -4.45902 | 1.38E-05 | 0.000118 | 2.346263 |
| CEP72    | 1.591048 | 2.855015 | 4.458431 | 1.38E-05 | 0.000118 | 2.867715 |
| CRYL1    | -1.29778 | 3.85728  | -4.45782 | 1.39E-05 | 0.000118 | 2.411862 |
| IL23A    | 2.422386 | 0.394039 | 4.456067 | 1.40E-05 | 0.000119 | 2.915781 |
| ZFPM2    | -1.61441 | 1.559818 | -4.45561 | 1.40E-05 | 0.000119 | 2.687949 |
| HIST1H1E | 1.894433 | 0.607417 | 4.454704 | 1.41E-05 | 0.00012  | 2.910654 |
| DDX18    | 0.692845 | 6.658593 | 4.454754 | 1.41E-05 | 0.00012  | 2.326202 |
| MECP2    | -0.6193  | 6.271513 | -4.45359 | 1.41E-05 | 0.00012  | 2.310244 |
| TRIP11   | -0.79832 | 5.68375  | -4.45124 | 1.43E-05 | 0.000121 | 2.303131 |
| PSMG3    | 1.092675 | 4.266504 | 4.449573 | 1.44E-05 | 0.000122 | 2.619112 |
| FAM3B    | -2.94929 | 1.790071 | -4.44872 | 1.44E-05 | 0.000122 | 2.464447 |
| PPP3CC   | -0.75501 | 3.470158 | -4.44818 | 1.44E-05 | 0.000122 | 2.47045  |
| TNFRSF25 | 1.722692 | 3.484818 | 4.447772 | 1.45E-05 | 0.000123 | 2.782771 |
| CCDC125  | -0.89675 | 2.992983 | -4.44701 | 1.45E-05 | 0.000123 | 2.527394 |
| SERINC1  | -0.74509 | 7.369437 | -4.4466  | 1.45E-05 | 0.000123 | 2.303706 |
| HDAC1    | 0.709872 | 7.196459 | 4.446615 | 1.45E-05 | 0.000123 | 2.282423 |
| MARVELD3 | 2.438842 | 3.886654 | 4.443707 | 1.47E-05 | 0.000124 | 2.791342 |
| ZNF329   | -1.38786 | 2.321138 | -4.44121 | 1.49E-05 | 0.000126 | 2.540865 |
| PTK7     | 1.730777 | 6.766261 | 4.438415 | 1.51E-05 | 0.000127 | 2.313475 |
| C13orf37 | 1.037833 | 4.842301 | 4.437429 | 1.51E-05 | 0.000128 | 2.465833 |
| CYB561D1 | -0.88268 | 3.970635 | -4.43604 | 1.52E-05 | 0.000128 | 2.345967 |
| UCN2     | 3.298292 | 0.562747 | 4.435776 | 1.52E-05 | 0.000128 | 2.838374 |
| POLR3GL  | -0.80294 | 3.835192 | -4.43328 | 1.54E-05 | 0.00013  | 2.357139 |
| THOP1    | 0.852342 | 5.460491 | 4.433285 | 1.54E-05 | 0.00013  | 2.338753 |
| ZNF423   | -1.40443 | 2.460082 | -4.43313 | 1.54E-05 | 0.00013  | 2.483123 |
| LAMP3    | 3.760559 | 4.742708 | 4.43289  | 1.54E-05 | 0.00013  | 2.775052 |
| SRR      | -0.87506 | 2.699265 | -4.43173 | 1.55E-05 | 0.00013  | 2.51611  |
| CSTF3    | 0.689168 | 5.061453 | 4.429389 | 1.56E-05 | 0.000131 | 2.352205 |
| MAPK8IP1 | -1.31472 | 2.697429 | -4.42851 | 1.57E-05 | 0.000132 | 2.440087 |
| SNX21    | -0.7519  | 3.84311  | -4.42779 | 1.57E-05 | 0.000132 | 2.338573 |
| PREX2    | -2.00455 | 0.66378  | -4.42654 | 1.58E-05 | 0.000133 | 2.651482 |
| PLA2G7   | 3.138111 | 2.369055 | 4.425025 | 1.59E-05 | 0.000133 | 2.798089 |
| EXOSC5   | 1.098994 | 4.228259 | 4.424398 | 1.60E-05 | 0.000134 | 2.52564  |
| GKAP1    | -1.47822 | 0.934614 | -4.4228  | 1.61E-05 | 0.000134 | 2.655995 |
| SCNM1    | 0.834248 | 4.399788 | 4.422789 | 1.61E-05 | 0.000134 | 2.449575 |
| PARP12   | 1.080861 | 5.808294 | 4.422014 | 1.61E-05 | 0.000135 | 2.280247 |
| NCOA1    | -0.72772 | 6.594511 | -4.42174 | 1.62E-05 | 0.000135 | 2.18721  |
| HNRNPM   | 0.383918 | 7.557145 | 4.420167 | 1.63E-05 | 0.000136 | 2.180323 |
| PHF1     | -0.70089 | 4.946316 | -4.4192  | 1.63E-05 | 0.000136 | 2.206358 |
| MAPKAPK3 | -0.82084 | 5.242483 | -4.41801 | 1.64E-05 | 0.000137 | 2.181218 |
| PKD1     | -1.03599 | 6.776795 | -4.41546 | 1.66E-05 | 0.000138 | 2.17066  |
| USP25    | -0.76197 | 5.34334  | -4.41167 | 1.69E-05 | 0.00014  | 2.153655 |
| STK33    | -2.09169 | 0.036164 | -4.41144 | 1.69E-05 | 0.00014  | 2.647723 |
| ATF4     | -0.64091 | 7.767854 | -4.41001 | 1.70E-05 | 0.000141 | 2.165139 |
| LSM12    | 0.615627 | 5.932108 | 4.409447 | 1.70E-05 | 0.000141 | 2.180335 |

|           |          |          |          |          |          |          |
|-----------|----------|----------|----------|----------|----------|----------|
| PNPT1     | 0.825991 | 5.422678 | 4.40858  | 1.71E-05 | 0.000142 | 2.241741 |
| LOC375190 | -1.38267 | 0.018618 | -4.40819 | 1.71E-05 | 0.000142 | 2.683052 |
| CYB5R1    | -1.10203 | 5.233143 | -4.40728 | 1.72E-05 | 0.000142 | 2.131308 |
| TMPO      | 0.940414 | 6.70779  | 4.407011 | 1.72E-05 | 0.000142 | 2.141703 |
| MAN2C1    | -0.55931 | 5.145802 | -4.40645 | 1.72E-05 | 0.000143 | 2.150449 |
| ANXA2P2   | 1.249952 | 8.437751 | 4.405632 | 1.73E-05 | 0.000143 | 2.124517 |
| CCT6A     | 0.898368 | 7.696308 | 4.405243 | 1.73E-05 | 0.000143 | 2.11654  |
| BCAP31    | 0.728497 | 7.378325 | 4.404898 | 1.73E-05 | 0.000143 | 2.114199 |
| DNAJC4    | -0.76494 | 4.622401 | -4.40325 | 1.75E-05 | 0.000144 | 2.162298 |
| MPP2      | -1.71183 | 1.441252 | -4.40211 | 1.75E-05 | 0.000145 | 2.480345 |
| ZNF441    | -0.97095 | 2.391968 | -4.40137 | 1.76E-05 | 0.000145 | 2.433373 |
| CCBL2     | -0.74144 | 4.44955  | -4.39972 | 1.77E-05 | 0.000146 | 2.164736 |
| CDC123    | 0.866123 | 5.731413 | 4.397491 | 1.79E-05 | 0.000148 | 2.169385 |
| RELL2     | 1.930772 | 2.116867 | 4.395195 | 1.81E-05 | 0.000149 | 2.673728 |
| DENND2A   | -1.35252 | 2.259324 | -4.39521 | 1.81E-05 | 0.000149 | 2.374839 |
| F13A1     | -1.93665 | 2.688915 | -4.39457 | 1.81E-05 | 0.000149 | 2.229176 |
| CYBRD1    | -1.83319 | 6.021465 | -4.3942  | 1.81E-05 | 0.000149 | 2.086336 |
| KIAA0319L | -0.76433 | 6.443425 | -4.39237 | 1.83E-05 | 0.00015  | 2.067904 |
| FAM161B   | -0.99148 | 1.158139 | -4.39073 | 1.84E-05 | 0.000151 | 2.550422 |
| ANXA10    | -3.53326 | 1.145281 | -4.39063 | 1.84E-05 | 0.000151 | 2.264066 |
| RAP1GAP2  | -1.43646 | 5.561801 | -4.38948 | 1.85E-05 | 0.000152 | 2.055199 |
| PRCC      | 0.586929 | 6.008729 | 4.389056 | 1.85E-05 | 0.000152 | 2.091343 |
| TNFRSF9   | 2.315788 | 0.183215 | 4.38867  | 1.86E-05 | 0.000152 | 2.659395 |
| SET       | 0.636161 | 8.006334 | 4.38727  | 1.87E-05 | 0.000153 | 2.05275  |
| DTX3L     | 0.927401 | 7.191382 | 4.386556 | 1.87E-05 | 0.000153 | 2.044435 |
| POLK      | -0.66104 | 4.484861 | -4.38445 | 1.89E-05 | 0.000155 | 2.106794 |
| POLR2H    | 0.845872 | 5.336931 | 4.383191 | 1.90E-05 | 0.000155 | 2.152287 |
| LOC388796 | 1.105869 | 4.527548 | 4.381702 | 1.91E-05 | 0.000156 | 2.307556 |
| PGK1      | 0.795826 | 8.493577 | 4.380868 | 1.92E-05 | 0.000157 | 2.034382 |
| NIP7      | 0.873285 | 5.070257 | 4.380188 | 1.92E-05 | 0.000157 | 2.176303 |
| VBP1      | 0.692849 | 5.355838 | 4.380045 | 1.92E-05 | 0.000157 | 2.121878 |
| SSBP3     | -0.89359 | 5.078297 | -4.37996 | 1.92E-05 | 0.000157 | 2.033484 |
| RAB37     | -1.76324 | 0.56633  | -4.37528 | 1.96E-05 | 0.00016  | 2.482944 |
| CISH      | -0.81068 | 3.346158 | -4.37545 | 1.96E-05 | 0.00016  | 2.192577 |
| ZNF254    | -1.50492 | 3.08219  | -4.37537 | 1.96E-05 | 0.00016  | 2.145956 |
| CRY1      | -0.70448 | 4.508804 | -4.37391 | 1.97E-05 | 0.000161 | 2.059282 |
| KCND3     | -1.98577 | 1.141188 | -4.37328 | 1.98E-05 | 0.000161 | 2.377671 |
| RPP14     | -0.52186 | 4.447164 | -4.37332 | 1.98E-05 | 0.000161 | 2.077357 |
| LRCH2     | -1.57651 | 0.878523 | -4.37056 | 2.00E-05 | 0.000163 | 2.446953 |
| EPS15     | -0.52474 | 6.354836 | -4.37002 | 2.01E-05 | 0.000163 | 1.975152 |
| C20orf72  | 1.027041 | 4.670751 | 4.369367 | 2.01E-05 | 0.000163 | 2.222247 |
| FGL2      | -2.04172 | 4.188986 | -4.36886 | 2.02E-05 | 0.000163 | 1.990453 |
| PER2      | -1.15911 | 5.766117 | -4.3684  | 2.02E-05 | 0.000164 | 1.969949 |
| MAOA      | -1.9731  | 6.005362 | -4.36825 | 2.02E-05 | 0.000164 | 1.985387 |
| DCAF6     | -0.63389 | 6.009962 | -4.36799 | 2.02E-05 | 0.000164 | 1.967192 |
| RASIP1    | -1.20924 | 3.28186  | -4.36645 | 2.04E-05 | 0.000165 | 2.117709 |
| RUFY3     | -0.72419 | 4.856884 | -4.36657 | 2.04E-05 | 0.000165 | 2.000838 |
| SERPINB5  | 4.70122  | 7.102524 | 4.365876 | 2.04E-05 | 0.000165 | 2.366028 |
| NR2C2AP   | 0.972281 | 3.878962 | 4.365836 | 2.04E-05 | 0.000165 | 2.330595 |
| C17orf39  | -0.76894 | 4.151641 | -4.36466 | 2.05E-05 | 0.000166 | 2.050995 |
| EIF6      | 0.928209 | 7.19783  | 4.364476 | 2.05E-05 | 0.000166 | 1.956411 |
| C1orf89   | -0.74762 | 1.378703 | -4.36282 | 2.07E-05 | 0.000167 | 2.44112  |
| ACO1      | -1.18339 | 5.537093 | -4.36238 | 2.07E-05 | 0.000167 | 1.946269 |
| RSAD1     | -0.71209 | 4.13674  | -4.35928 | 2.10E-05 | 0.000169 | 2.037575 |
| MUT       | -0.70483 | 5.192345 | -4.35918 | 2.10E-05 | 0.000169 | 1.952885 |
| GOLGA4    | -0.99949 | 7.400232 | -4.35885 | 2.10E-05 | 0.000169 | 1.960035 |
| ABCD3     | -0.9052  | 5.876117 | -4.35893 | 2.10E-05 | 0.000169 | 1.931353 |
| C3orf26   | 1.31876  | 3.847432 | 4.358033 | 2.11E-05 | 0.000169 | 2.349778 |

|           |          |          |          |          |          |          |
|-----------|----------|----------|----------|----------|----------|----------|
| REPS2     | -1.87011 | 3.72054  | -4.35634 | 2.12E-05 | 0.000171 | 1.97835  |
| MRT04     | 0.799432 | 5.370771 | 4.353273 | 2.15E-05 | 0.000173 | 2.024573 |
| CNTN4     | -1.93967 | 0.871351 | -4.35218 | 2.16E-05 | 0.000173 | 2.340835 |
| TBRG4     | 0.811065 | 6.088404 | 4.351676 | 2.17E-05 | 0.000174 | 1.952166 |
| MPP7      | -1.56092 | 5.0166   | -4.35102 | 2.17E-05 | 0.000174 | 1.90512  |
| MTMR3     | -0.70906 | 6.044464 | -4.34931 | 2.19E-05 | 0.000175 | 1.892805 |
| SMPD4     | 0.552428 | 7.01775  | 4.348661 | 2.19E-05 | 0.000175 | 1.890958 |
| TNFRSF4   | 1.970721 | 0.946215 | 4.348067 | 2.20E-05 | 0.000176 | 2.506664 |
| SHFM1     | 1.075285 | 6.682747 | 4.346034 | 2.22E-05 | 0.000177 | 1.906617 |
| GPR19     | 2.076796 | 0.318135 | 4.34419  | 2.23E-05 | 0.000178 | 2.492027 |
| LSM7      | 1.05756  | 4.634553 | 4.343586 | 2.24E-05 | 0.000179 | 2.130211 |
| ENPP4     | -2.04673 | 3.893863 | -4.34345 | 2.24E-05 | 0.000179 | 1.90509  |
| ADAMTSL4  | -1.7379  | 4.47254  | -4.34046 | 2.27E-05 | 0.000181 | 1.875063 |
| BMP1      | 1.294886 | 5.924745 | 4.338436 | 2.29E-05 | 0.000182 | 1.955192 |
| HIST1H3D  | 2.133678 | 0.162343 | 4.336453 | 2.31E-05 | 0.000184 | 2.463023 |
| ADPGK     | 0.594851 | 5.530441 | 4.335485 | 2.32E-05 | 0.000184 | 1.919423 |
| MT1F      | -1.58935 | 2.375495 | -4.33487 | 2.32E-05 | 0.000185 | 2.090135 |
| IFITM3    | 1.266342 | 8.388551 | 4.334715 | 2.32E-05 | 0.000185 | 1.841406 |
| SCD       | 1.639848 | 8.248575 | 4.333836 | 2.33E-05 | 0.000185 | 1.832984 |
| FLAD1     | 0.786532 | 5.507479 | 4.333545 | 2.34E-05 | 0.000185 | 1.931112 |
| SLC2A11   | -1.1881  | 1.546484 | -4.33236 | 2.35E-05 | 0.000186 | 2.259213 |
| CPNE1     | 1.043747 | 7.037062 | 4.332465 | 2.35E-05 | 0.000186 | 1.83643  |
| SENP7     | -1.0498  | 3.975193 | -4.33063 | 2.36E-05 | 0.000187 | 1.910531 |
| PCMTD1    | -0.79596 | 5.752334 | -4.33077 | 2.36E-05 | 0.000187 | 1.82117  |
| HIST1H2BJ | 2.735823 | 1.696962 | 4.329209 | 2.38E-05 | 0.000188 | 2.436071 |
| NUP93     | 0.827557 | 5.68144  | 4.328921 | 2.38E-05 | 0.000188 | 1.898921 |
| HADH      | -0.88395 | 5.403107 | -4.32893 | 2.38E-05 | 0.000188 | 1.819683 |
| LSG1      | 0.854284 | 6.058863 | 4.328472 | 2.38E-05 | 0.000189 | 1.865915 |
| PYROXD1   | -0.77982 | 4.367944 | -4.32807 | 2.39E-05 | 0.000189 | 1.885077 |
| PPAP2C    | 1.783908 | 5.748092 | 4.327195 | 2.40E-05 | 0.000189 | 1.994374 |
| TSC22D1   | -0.94915 | 7.454413 | -4.32723 | 2.40E-05 | 0.000189 | 1.835188 |
| CPT2      | -0.68287 | 5.081455 | -4.32615 | 2.41E-05 | 0.00019  | 1.829251 |
| SCMH1     | -0.80636 | 5.259126 | -4.32552 | 2.41E-05 | 0.00019  | 1.812988 |
| PSMD3     | 1.092979 | 7.28057  | 4.323622 | 2.43E-05 | 0.000192 | 1.79636  |
| POLE3     | 0.768591 | 6.259337 | 4.323348 | 2.44E-05 | 0.000192 | 1.825138 |
| MRPS36    | -0.67024 | 3.601549 | -4.32232 | 2.45E-05 | 0.000193 | 1.962365 |
| FXVD6     | -1.45482 | 3.150089 | -4.32095 | 2.46E-05 | 0.000194 | 1.927232 |
| EEF2      | -0.78518 | 11.18866 | -4.32086 | 2.46E-05 | 0.000194 | 1.919886 |
| ZNF433    | -1.51345 | 0.966352 | -4.31469 | 2.52E-05 | 0.000198 | 2.22617  |
| ABHD6     | -0.90119 | 3.302034 | -4.31447 | 2.53E-05 | 0.000198 | 1.946625 |
| PLCB4     | -2.12337 | 3.68013  | -4.31408 | 2.53E-05 | 0.000199 | 1.799656 |
| PSMA5     | 0.673428 | 6.114105 | 4.314152 | 2.53E-05 | 0.000199 | 1.792924 |
| GABPB1    | 0.634065 | 4.492676 | 4.313493 | 2.54E-05 | 0.000199 | 1.970839 |
| TRAK2     | -0.83885 | 5.490784 | -4.31355 | 2.54E-05 | 0.000199 | 1.757683 |
| ZNF175    | -1.16461 | 2.533315 | -4.31305 | 2.54E-05 | 0.000199 | 2.032881 |
| PPIH      | 0.954096 | 4.337578 | 4.310858 | 2.57E-05 | 0.000201 | 2.038237 |
| THOC6     | 1.14131  | 4.207122 | 4.310595 | 2.57E-05 | 0.000201 | 2.086922 |
| TYW3      | -0.5957  | 4.63148  | -4.31049 | 2.57E-05 | 0.000201 | 1.805871 |
| GMPS      | 0.997344 | 6.35699  | 4.308321 | 2.59E-05 | 0.000202 | 1.774026 |
| LAPTM4B   | 1.049692 | 7.490333 | 4.308385 | 2.59E-05 | 0.000202 | 1.732533 |
| GAB1      | -1.0291  | 5.208269 | -4.30709 | 2.61E-05 | 0.000203 | 1.736043 |
| KCNH2     | -1.92537 | 1.845535 | -4.30648 | 2.61E-05 | 0.000204 | 2.012159 |
| ALS2CR8   | -0.89146 | 2.792094 | -4.30645 | 2.61E-05 | 0.000204 | 2.00307  |
| RCN1      | 1.034363 | 6.71926  | 4.305817 | 2.62E-05 | 0.000204 | 1.744212 |
| MAP3K3    | -0.70279 | 4.97699  | -4.30491 | 2.63E-05 | 0.000205 | 1.750506 |
| PPAT      | 1.082471 | 4.473734 | 4.304143 | 2.64E-05 | 0.000205 | 2.008783 |
| IQSEC1    | -0.86379 | 6.07071  | -4.30402 | 2.64E-05 | 0.000205 | 1.715003 |
| GIMAP6    | -1.23087 | 3.103664 | -4.30387 | 2.64E-05 | 0.000205 | 1.892572 |

|              |          |          |          |          |          |          |
|--------------|----------|----------|----------|----------|----------|----------|
| PXMP4        | -0.80173 | 4.204848 | -4.30365 | 2.64E-05 | 0.000205 | 1.803033 |
| ACAD10       | -0.74984 | 4.639439 | -4.30267 | 2.65E-05 | 0.000206 | 1.763662 |
| C3orf37      | 0.891477 | 5.535504 | 4.302504 | 2.66E-05 | 0.000206 | 1.815889 |
| KBTBD3       | -0.89679 | 1.669699 | -4.3012  | 2.67E-05 | 0.000207 | 2.155962 |
| ACSM3        | -2.50841 | 1.228545 | -4.29907 | 2.69E-05 | 0.000209 | 2.013018 |
| LOC100132707 | -0.96934 | 1.49366  | -4.29885 | 2.70E-05 | 0.000209 | 2.160512 |
| TDRD3        | -0.72299 | 3.865577 | -4.29778 | 2.71E-05 | 0.00021  | 1.824732 |
| ING3         | -0.64907 | 3.198442 | -4.29635 | 2.72E-05 | 0.000211 | 1.930277 |
| TARSL2       | -0.66813 | 3.298875 | -4.29592 | 2.73E-05 | 0.000211 | 1.907803 |
| ILK          | -0.76978 | 6.240199 | -4.29568 | 2.73E-05 | 0.000211 | 1.682813 |
| DHX9         | 0.488727 | 7.750094 | 4.295448 | 2.73E-05 | 0.000211 | 1.68725  |
| TPM2         | -1.66308 | 6.270637 | -4.29525 | 2.74E-05 | 0.000211 | 1.696134 |
| NUDT12       | -1.15959 | 3.711107 | -4.29509 | 2.74E-05 | 0.000211 | 1.791191 |
| GLYR1        | -0.54431 | 6.73497  | -4.29457 | 2.74E-05 | 0.000212 | 1.68213  |
| THUMPD1      | -0.62066 | 5.548495 | -4.29259 | 2.77E-05 | 0.000213 | 1.678759 |
| CTSB         | 1.179274 | 10.15264 | 4.291834 | 2.77E-05 | 0.000214 | 1.720735 |
| PLLP         | -1.93034 | 3.936618 | -4.29157 | 2.78E-05 | 0.000214 | 1.704204 |
| MKL2         | -0.67215 | 6.331321 | -4.29005 | 2.80E-05 | 0.000215 | 1.660657 |
| CDON         | -1.39039 | 2.877269 | -4.28942 | 2.80E-05 | 0.000216 | 1.848614 |
| UGP2         | -0.53898 | 6.482845 | -4.28875 | 2.81E-05 | 0.000216 | 1.655723 |
| LRRK2        | -1.7558  | 2.561851 | -4.28811 | 2.82E-05 | 0.000217 | 1.844199 |
| CCDC138      | 1.3077   | 2.159393 | 4.287217 | 2.83E-05 | 0.000217 | 2.234486 |
| LOC100128191 | 1.503617 | 2.655179 | 4.287277 | 2.83E-05 | 0.000217 | 2.212988 |
| SQLE         | 1.64615  | 6.381219 | 4.284237 | 2.86E-05 | 0.00022  | 1.729366 |
| CXCL17       | -3.16198 | 3.206794 | -4.28409 | 2.86E-05 | 0.00022  | 1.675764 |
| NFATC2       | -1.69526 | 2.833942 | -4.28336 | 2.87E-05 | 0.00022  | 1.799353 |
| MRPL3        | 0.746695 | 6.613499 | 4.282788 | 2.88E-05 | 0.000221 | 1.646225 |
| EIF5A        | 0.874044 | 7.946337 | 4.282593 | 2.88E-05 | 0.000221 | 1.634672 |
| IL17RC       | -0.76309 | 4.379483 | -4.28116 | 2.90E-05 | 0.000222 | 1.701022 |
| GNB1L        | 1.172959 | 2.530469 | 4.280406 | 2.91E-05 | 0.000222 | 2.172654 |
| HMGN2        | 0.741123 | 7.642203 | 4.278235 | 2.93E-05 | 0.000224 | 1.614938 |
| ETV4         | 3.663803 | 5.036966 | 4.27777  | 2.94E-05 | 0.000225 | 2.145479 |
| FOXP2        | -2.30308 | 1.378306 | -4.27657 | 2.95E-05 | 0.000225 | 1.917857 |
| MORC2        | 0.606327 | 5.707933 | 4.276655 | 2.95E-05 | 0.000225 | 1.672936 |
| TBC1D13      | -0.63884 | 5.238968 | -4.27046 | 3.03E-05 | 0.000231 | 1.604279 |
| SOSTDC1      | -2.61701 | 1.694722 | -4.26829 | 3.06E-05 | 0.000233 | 1.797715 |
| GADD45G      | -1.35476 | 1.744011 | -4.26777 | 3.06E-05 | 0.000233 | 1.959898 |
| PPP4C        | 0.769268 | 6.332618 | 4.266396 | 3.08E-05 | 0.000235 | 1.597536 |
| CHRNA5       | 1.836498 | 2.454371 | 4.265064 | 3.10E-05 | 0.000236 | 2.160875 |
| SMYD5        | 0.676124 | 5.134393 | 4.264245 | 3.11E-05 | 0.000236 | 1.68956  |
| ADAM28       | -2.11304 | 2.916789 | -4.26427 | 3.11E-05 | 0.000236 | 1.678108 |
| PIGN         | -0.89598 | 4.679829 | -4.26244 | 3.13E-05 | 0.000238 | 1.593948 |
| GGTA1        | -1.52102 | 0.827803 | -4.2613  | 3.15E-05 | 0.000239 | 2.035003 |
| ASB2         | -1.67599 | 2.001156 | -4.25965 | 3.17E-05 | 0.00024  | 1.835871 |
| C14orf1      | 0.77974  | 5.481687 | 4.2587   | 3.18E-05 | 0.000241 | 1.639782 |
| SF3A2        | 0.738182 | 6.938211 | 4.257925 | 3.19E-05 | 0.000242 | 1.538871 |
| RPH3AL       | -1.52195 | 2.807772 | -4.25575 | 3.22E-05 | 0.000244 | 1.714972 |
| TNRC6C       | -0.90009 | 4.603179 | -4.25455 | 3.23E-05 | 0.000245 | 1.568154 |
| TSSC1        | 0.869858 | 4.535985 | 4.253802 | 3.24E-05 | 0.000245 | 1.768417 |
| C10orf108    | -2.40021 | 0.68594  | -4.25219 | 3.26E-05 | 0.000247 | 1.927091 |
| C20orf3      | 0.773552 | 6.532399 | 4.251787 | 3.27E-05 | 0.000247 | 1.530156 |
| FXYD5        | 1.457839 | 6.519067 | 4.251487 | 3.27E-05 | 0.000247 | 1.573098 |
| GIMAP5       | -1.24499 | 2.470819 | -4.25112 | 3.28E-05 | 0.000248 | 1.790343 |
| C5orf33      | -0.74446 | 4.761994 | -4.25109 | 3.28E-05 | 0.000248 | 1.552955 |
| EEPD1        | -1.40047 | 3.993624 | -4.25074 | 3.28E-05 | 0.000248 | 1.57078  |
| C17orf107    | -1.21958 | 1.407799 | -4.25038 | 3.29E-05 | 0.000248 | 1.959017 |
| REEP4        | 1.274951 | 5.532899 | 4.249201 | 3.31E-05 | 0.000249 | 1.649829 |
| IFI6         | 2.283551 | 7.166984 | 4.247985 | 3.32E-05 | 0.00025  | 1.572113 |

|            |          |          |          |          |          |          |
|------------|----------|----------|----------|----------|----------|----------|
| LMCD1      | -1.13301 | 3.783276 | -4.24716 | 3.33E-05 | 0.000251 | 1.597099 |
| ZZEF1      | -0.81452 | 6.685184 | -4.24337 | 3.38E-05 | 0.000255 | 1.48593  |
| ANKRD12    | -0.95384 | 6.45104  | -4.24282 | 3.39E-05 | 0.000255 | 1.482073 |
| TUBG2      | -0.91835 | 3.431891 | -4.24124 | 3.41E-05 | 0.000257 | 1.638244 |
| PFN1       | 0.711646 | 9.11687  | 4.23569  | 3.49E-05 | 0.000262 | 1.48284  |
| BOP1       | 2.030885 | 4.609718 | 4.235419 | 3.50E-05 | 0.000262 | 1.859684 |
| CCL3       | 2.50842  | 0.547783 | 4.234688 | 3.51E-05 | 0.000263 | 2.085802 |
| POLA2      | 1.086633 | 4.739927 | 4.233501 | 3.52E-05 | 0.000264 | 1.689051 |
| TLCD1      | 1.636221 | 3.308146 | 4.23097  | 3.56E-05 | 0.000267 | 1.954554 |
| ZNF271     | -0.65878 | 4.594224 | -4.22974 | 3.58E-05 | 0.000268 | 1.4897   |
| SFN        | 2.887638 | 8.276585 | 4.229524 | 3.58E-05 | 0.000268 | 1.459309 |
| CCDC77     | 1.187991 | 2.792672 | 4.228545 | 3.60E-05 | 0.000269 | 1.95432  |
| SNRPF      | 1.048324 | 5.481004 | 4.228485 | 3.60E-05 | 0.000269 | 1.550087 |
| AES        | -0.73274 | 7.949051 | -4.22604 | 3.63E-05 | 0.000272 | 1.449129 |
| CRYBG3     | -0.89177 | 4.745723 | -4.22445 | 3.66E-05 | 0.000273 | 1.442019 |
| DEF8       | -0.668   | 5.018175 | -4.22455 | 3.65E-05 | 0.000273 | 1.436884 |
| GLOD4      | -0.67049 | 5.489144 | -4.22399 | 3.66E-05 | 0.000273 | 1.412421 |
| GGA2       | -0.62835 | 5.983371 | -4.22325 | 3.67E-05 | 0.000274 | 1.399916 |
| TMEM56     | -1.86246 | 3.288167 | -4.221   | 3.71E-05 | 0.000276 | 1.488385 |
| DIP2C      | -1.03397 | 4.647218 | -4.21958 | 3.73E-05 | 0.000278 | 1.421608 |
| FAM91A1    | 0.808394 | 6.75038  | 4.218195 | 3.75E-05 | 0.000279 | 1.392306 |
| SLC25A20   | -1.15035 | 3.09382  | -4.21725 | 3.76E-05 | 0.00028  | 1.57078  |
| SBF2       | -0.66203 | 5.828849 | -4.21705 | 3.77E-05 | 0.00028  | 1.377493 |
| KDM4C      | -0.71064 | 4.903013 | -4.21684 | 3.77E-05 | 0.00028  | 1.412587 |
| FOXO4      | -0.88959 | 3.663429 | -4.21662 | 3.77E-05 | 0.000281 | 1.516891 |
| TSPAN12    | -1.67901 | 2.716599 | -4.21558 | 3.79E-05 | 0.000282 | 1.556288 |
| PHF6       | 0.730473 | 5.35095  | 4.210858 | 3.86E-05 | 0.000287 | 1.464228 |
| ZNF717     | -1.68053 | 0.799804 | -4.20914 | 3.89E-05 | 0.000289 | 1.825792 |
| TRAF2      | 0.906464 | 4.409204 | 4.207993 | 3.91E-05 | 0.00029  | 1.620713 |
| CD302      | -1.29874 | 4.778512 | -4.20401 | 3.97E-05 | 0.000294 | 1.34328  |
| CRAT       | -1.51268 | 5.4572   | -4.20247 | 4.00E-05 | 0.000296 | 1.322052 |
| SHKBP1     | 0.617625 | 6.4813   | 4.201086 | 4.02E-05 | 0.000298 | 1.329783 |
| MTHFR      | -1.05057 | 5.354268 | -4.20006 | 4.04E-05 | 0.000299 | 1.31555  |
| SUMO2      | 0.626829 | 6.906603 | 4.199051 | 4.05E-05 | 0.0003   | 1.309452 |
| ZRANB1     | -0.49163 | 5.614332 | -4.19733 | 4.08E-05 | 0.000302 | 1.310314 |
| TRPM2      | 1.964025 | 3.09628  | 4.194983 | 4.12E-05 | 0.000304 | 1.863135 |
| BCL11B     | 2.834906 | 4.558411 | 4.194863 | 4.12E-05 | 0.000304 | 1.802529 |
| C2orf88    | -1.51212 | 2.207169 | -4.19502 | 4.12E-05 | 0.000304 | 1.584167 |
| CSGALNACT1 | -1.25448 | 3.894436 | -4.19519 | 4.12E-05 | 0.000304 | 1.375829 |
| ZNF652     | -0.73258 | 6.090988 | -4.19495 | 4.12E-05 | 0.000304 | 1.290449 |
| EXT1       | 0.940784 | 6.533147 | 4.193953 | 4.14E-05 | 0.000305 | 1.314833 |
| CTSC       | 1.38127  | 7.569331 | 4.194007 | 4.14E-05 | 0.000305 | 1.291817 |
| KIAA0753   | -0.64024 | 4.362487 | -4.19045 | 4.20E-05 | 0.000309 | 1.361187 |
| ZNF295     | -0.66034 | 4.996082 | -4.18948 | 4.21E-05 | 0.00031  | 1.303606 |
| SFRS1      | 0.422474 | 7.726838 | 4.187601 | 4.25E-05 | 0.000312 | 1.269483 |
| LARP1B     | -0.70043 | 4.589067 | -4.18578 | 4.28E-05 | 0.000314 | 1.318227 |
| TAGLN      | -2.08027 | 7.012444 | -4.18493 | 4.29E-05 | 0.000315 | 1.299712 |
| NUP62CL    | 2.50298  | 1.491666 | 4.184174 | 4.30E-05 | 0.000316 | 1.901012 |
| MIA3       | -0.67951 | 6.675942 | -4.1842  | 4.30E-05 | 0.000316 | 1.255268 |
| UGCG       | -0.98703 | 4.476629 | -4.18355 | 4.32E-05 | 0.000316 | 1.298758 |
| HSDL2      | -0.78099 | 5.727164 | -4.18361 | 4.31E-05 | 0.000316 | 1.24901  |
| CDH24      | 1.64985  | 3.855691 | 4.180627 | 4.37E-05 | 0.00032  | 1.704868 |
| CASP8      | 0.992177 | 5.375756 | 4.179494 | 4.39E-05 | 0.000321 | 1.369095 |
| BNC2       | -1.61998 | 2.547527 | -4.17837 | 4.41E-05 | 0.000323 | 1.440687 |
| ME2        | -0.79679 | 5.421423 | -4.17739 | 4.42E-05 | 0.000324 | 1.231882 |
| TEX10      | 0.787151 | 4.837307 | 4.176021 | 4.45E-05 | 0.000325 | 1.404717 |
| TNFAIP8L3  | -1.44675 | 1.752845 | -4.17588 | 4.45E-05 | 0.000325 | 1.591856 |
| WDR43      | 0.703326 | 6.055615 | 4.175532 | 4.46E-05 | 0.000326 | 1.261226 |

|           |          |          |          |          |          |          |
|-----------|----------|----------|----------|----------|----------|----------|
| INPP5B    | -0.66378 | 4.392984 | -4.17509 | 4.47E-05 | 0.000326 | 1.297763 |
| N4BP3     | -1.14075 | 3.526826 | -4.1747  | 4.47E-05 | 0.000326 | 1.347823 |
| SNRPA1    | 0.895965 | 4.017043 | 4.170622 | 4.55E-05 | 0.000332 | 1.544305 |
| CCDC58    | 1.082813 | 3.051297 | 4.169399 | 4.57E-05 | 0.000333 | 1.696495 |
| SKP2      | 1.578275 | 4.259307 | 4.169168 | 4.57E-05 | 0.000333 | 1.599005 |
| TMEM129   | -0.8111  | 5.045591 | -4.16911 | 4.57E-05 | 0.000333 | 1.215353 |
| RGS2      | -1.59107 | 4.928513 | -4.16838 | 4.59E-05 | 0.000334 | 1.195274 |
| NME2      | 0.809839 | 8.045187 | 4.167833 | 4.60E-05 | 0.000334 | 1.193494 |
| CYP4X1    | -1.96683 | 2.177908 | -4.16698 | 4.61E-05 | 0.000335 | 1.414851 |
| PSMB8     | 1.154568 | 6.278623 | 4.167107 | 4.61E-05 | 0.000335 | 1.244811 |
| TMEM88    | -1.14696 | 0.596012 | -4.16562 | 4.64E-05 | 0.000337 | 1.729408 |
| SMC6      | 0.875669 | 5.614665 | 4.165393 | 4.64E-05 | 0.000337 | 1.276106 |
| C2orf55   | -1.55764 | 3.312838 | -4.1637  | 4.68E-05 | 0.000339 | 1.292853 |
| C5orf41   | -0.87003 | 4.413839 | -4.16361 | 4.68E-05 | 0.000339 | 1.235467 |
| XPC       | -0.60544 | 4.930395 | -4.16349 | 4.68E-05 | 0.000339 | 1.212023 |
| HOXD9     | 2.462707 | 1.476849 | 4.162912 | 4.69E-05 | 0.00034  | 1.823843 |
| WDR48     | -0.59759 | 5.14215  | -4.16277 | 4.69E-05 | 0.00034  | 1.195757 |
| KIAA1161  | -1.54985 | 4.930416 | -4.16248 | 4.70E-05 | 0.00034  | 1.173508 |
| HDLBP     | -0.66226 | 9.319143 | -4.16178 | 4.71E-05 | 0.000341 | 1.242348 |
| PPP2R3A   | -1.7469  | 4.751115 | -4.16019 | 4.74E-05 | 0.000343 | 1.165797 |
| MICB      | 2.6422   | 2.909437 | 4.159607 | 4.75E-05 | 0.000343 | 1.782595 |
| C10orf118 | -0.9887  | 5.439529 | -4.15869 | 4.77E-05 | 0.000344 | 1.156157 |
| SH3BGRL   | -1.13701 | 6.355873 | -4.1565  | 4.81E-05 | 0.000347 | 1.151382 |
| PLAUR     | 1.712463 | 5.587835 | 4.156353 | 4.82E-05 | 0.000347 | 1.348072 |
| GAD1      | 3.330441 | 0.420656 | 4.154612 | 4.85E-05 | 0.00035  | 1.794152 |
| GULP1     | -1.67067 | 4.170185 | -4.15431 | 4.86E-05 | 0.00035  | 1.169892 |
| MEF2D     | -0.6819  | 6.459154 | -4.15262 | 4.89E-05 | 0.000352 | 1.131233 |
| ITGB3     | -1.4758  | 3.102217 | -4.15125 | 4.92E-05 | 0.000354 | 1.276356 |
| TRAF3     | 0.822885 | 4.377626 | 4.150379 | 4.93E-05 | 0.000355 | 1.391417 |
| TMEM170B  | -1.35114 | 2.235554 | -4.1486  | 4.97E-05 | 0.000357 | 1.423789 |
| SDS       | 3.208967 | 2.080258 | 4.147943 | 4.98E-05 | 0.000358 | 1.769499 |
| ST3GAL6   | -1.29321 | 1.372943 | -4.14561 | 5.03E-05 | 0.000361 | 1.557088 |
| PPP1R14A  | -1.2951  | 1.721112 | -4.14391 | 5.06E-05 | 0.000363 | 1.496076 |
| SH3GLB2   | -0.7265  | 5.752393 | -4.14391 | 5.06E-05 | 0.000363 | 1.097603 |
| UBE2I     | 0.629815 | 6.294052 | 4.14341  | 5.07E-05 | 0.000364 | 1.118672 |
| ELAC1     | -0.73546 | 1.763284 | -4.14146 | 5.11E-05 | 0.000367 | 1.553979 |
| ZFAND5    | -0.69203 | 7.576012 | -4.14073 | 5.13E-05 | 0.000367 | 1.109777 |
| GSTP1     | 1.278107 | 9.066398 | 4.140786 | 5.13E-05 | 0.000367 | 1.103358 |
| ARID4A    | -0.75452 | 5.279609 | -4.14097 | 5.12E-05 | 0.000367 | 1.099265 |
| YWHAZ     | 0.839395 | 10.21829 | 4.140332 | 5.14E-05 | 0.000367 | 1.147626 |
| TEF       | -1.07087 | 4.487351 | -4.14035 | 5.14E-05 | 0.000367 | 1.127466 |
| RMND5B    | -0.81156 | 4.713454 | -4.14022 | 5.14E-05 | 0.000367 | 1.126361 |
| IFNAR1    | -0.61078 | 6.207641 | -4.14025 | 5.14E-05 | 0.000367 | 1.081122 |
| ZIC5      | 4.358173 | 0.646797 | 4.139632 | 5.15E-05 | 0.000368 | 1.739991 |
| KCNIP3    | -1.45499 | 1.617275 | -4.1385  | 5.17E-05 | 0.000369 | 1.472531 |
| TIPIN     | 1.051742 | 2.81114  | 4.138276 | 5.18E-05 | 0.000369 | 1.602218 |
| CYB5A     | -1.07386 | 4.732917 | -4.13776 | 5.19E-05 | 0.00037  | 1.101443 |
| KCTD5     | 0.723692 | 5.665239 | 4.137471 | 5.20E-05 | 0.00037  | 1.151134 |
| CYP27B1   | 2.090826 | 1.747927 | 4.137163 | 5.20E-05 | 0.00037  | 1.724474 |
| MAP9      | -1.69827 | 3.04834  | -4.13632 | 5.22E-05 | 0.000371 | 1.204496 |
| NDUFS4    | -0.71205 | 4.356189 | -4.13632 | 5.22E-05 | 0.000371 | 1.149902 |
| SLC16A3   | 1.284794 | 5.975017 | 4.135377 | 5.24E-05 | 0.000373 | 1.163178 |
| POLD2     | 0.842168 | 6.417421 | 4.134403 | 5.26E-05 | 0.000374 | 1.088724 |
| SMARCD1   | 0.586471 | 6.420548 | 4.134202 | 5.26E-05 | 0.000374 | 1.075481 |
| C5orf44   | -0.48944 | 4.051792 | -4.13381 | 5.27E-05 | 0.000374 | 1.194602 |
| TGFBRAP1  | -0.70979 | 4.783218 | -4.13188 | 5.31E-05 | 0.000377 | 1.096292 |
| ATXN2L    | 0.530389 | 8.065374 | 4.131625 | 5.32E-05 | 0.000377 | 1.060571 |
| REV3L     | -0.75183 | 5.513278 | -4.13171 | 5.32E-05 | 0.000377 | 1.056061 |

|          |          |          |          |          |          |          |
|----------|----------|----------|----------|----------|----------|----------|
| SMAD4    | -0.88926 | 5.948324 | -4.12944 | 5.36E-05 | 0.00038  | 1.040588 |
| BMPR1B   | -2.11397 | 1.114898 | -4.12835 | 5.39E-05 | 0.000382 | 1.42707  |
| MAPRE2   | -0.93724 | 5.528586 | -4.12812 | 5.39E-05 | 0.000382 | 1.038788 |
| HSPBP1   | 0.683213 | 5.53946  | 4.127176 | 5.41E-05 | 0.000383 | 1.120544 |
| C4orf46  | 1.14262  | 3.925824 | 4.12673  | 5.42E-05 | 0.000383 | 1.42991  |
| AGTRAP   | 1.185699 | 5.232132 | 4.124822 | 5.46E-05 | 0.000386 | 1.206507 |
| GAS6     | -1.2528  | 6.294728 | -4.12396 | 5.48E-05 | 0.000387 | 1.028595 |
| DNMT3B   | 2.65874  | 3.330837 | 4.121877 | 5.53E-05 | 0.00039  | 1.620964 |
| IPP      | -0.58255 | 3.811184 | -4.12198 | 5.53E-05 | 0.00039  | 1.170859 |
| SETDB2   | -0.67694 | 3.809    | -4.12186 | 5.53E-05 | 0.00039  | 1.160047 |
| C3orf70  | -1.45155 | 2.717413 | -4.12165 | 5.53E-05 | 0.00039  | 1.221628 |
| ZNF546   | -1.02322 | 1.407618 | -4.12099 | 5.55E-05 | 0.000391 | 1.489657 |
| DARS2    | 0.986157 | 5.652151 | 4.120761 | 5.55E-05 | 0.000391 | 1.11408  |
| LYAR     | 1.046129 | 4.498236 | 4.120241 | 5.57E-05 | 0.000392 | 1.293025 |
| STAM2    | -0.56133 | 5.566733 | -4.11897 | 5.59E-05 | 0.000394 | 1.011044 |
| ARHGEF6  | -1.18592 | 3.434624 | -4.11656 | 5.65E-05 | 0.000397 | 1.132391 |
| CRIPAK   | -0.83063 | 3.613244 | -4.11613 | 5.66E-05 | 0.000398 | 1.147983 |
| C5orf32  | -2.31313 | 6.06213  | -4.11588 | 5.66E-05 | 0.000398 | 1.016089 |
| FZD2     | 2.419077 | 2.754401 | 4.115611 | 5.67E-05 | 0.000398 | 1.618449 |
| TCF25    | -0.52874 | 6.194217 | -4.11503 | 5.68E-05 | 0.000399 | 0.985267 |
| IL24     | 3.659702 | 0.131183 | 4.114678 | 5.69E-05 | 0.000399 | 1.650553 |
| BBS2     | -0.70268 | 4.553188 | -4.11364 | 5.71E-05 | 0.000401 | 1.046016 |
| UTP14A   | 0.708722 | 4.703816 | 4.11159  | 5.76E-05 | 0.000404 | 1.170586 |
| MAN2B2   | -0.74297 | 6.101475 | -4.11168 | 5.76E-05 | 0.000404 | 0.97308  |
| ABHD5    | -0.78743 | 4.906397 | -4.10881 | 5.83E-05 | 0.000408 | 0.995296 |
| H2AFY    | 0.599431 | 7.424786 | 4.108297 | 5.84E-05 | 0.000408 | 0.960809 |
| VPS53    | -0.56139 | 6.041065 | -4.1081  | 5.84E-05 | 0.000409 | 0.95973  |
| SNX8     | 1.027458 | 4.201709 | 4.107103 | 5.87E-05 | 0.00041  | 1.293928 |
| TBC1D17  | -0.6016  | 5.236509 | -4.10706 | 5.87E-05 | 0.00041  | 0.978693 |
| MYL9     | -2.05738 | 6.834815 | -4.10687 | 5.87E-05 | 0.00041  | 0.996734 |
| FAM63B   | -0.80203 | 4.33481  | -4.10585 | 5.89E-05 | 0.000411 | 1.028932 |
| OXR1     | -0.6981  | 5.625522 | -4.10542 | 5.90E-05 | 0.000412 | 0.954799 |
| ABHD14A  | -0.83665 | 2.843083 | -4.10359 | 5.95E-05 | 0.000415 | 1.228042 |
| ECE2     | 1.397971 | 3.687633 | 4.103375 | 5.95E-05 | 0.000415 | 1.409381 |
| UQCRCQ   | -0.78716 | 5.906057 | -4.103   | 5.96E-05 | 0.000415 | 0.940452 |
| PCDHGB6  | -1.47852 | 0.980122 | -4.10093 | 6.01E-05 | 0.000419 | 1.418016 |
| FAHD2A   | -0.69905 | 3.297147 | -4.10066 | 6.02E-05 | 0.000419 | 1.157119 |
| AKAP13   | -0.87442 | 7.780264 | -4.10015 | 6.03E-05 | 0.000419 | 0.967305 |
| FABP4    | -2.65992 | 0.408895 | -4.09991 | 6.04E-05 | 0.000419 | 1.355363 |
| C1orf107 | 0.683139 | 5.382886 | 4.099851 | 6.04E-05 | 0.000419 | 1.03362  |
| BBS4     | -0.58549 | 3.412028 | -4.09958 | 6.04E-05 | 0.00042  | 1.149891 |
| SLC9A3R2 | -0.88977 | 5.267222 | -4.09953 | 6.05E-05 | 0.00042  | 0.938734 |
| DOCK3    | -1.73042 | 1.112534 | -4.09907 | 6.06E-05 | 0.00042  | 1.362673 |
| ABCA2    | -1.4054  | 5.919957 | -4.0982  | 6.08E-05 | 0.000421 | 0.928032 |
| NRARP    | 1.483698 | 6.313549 | 4.097636 | 6.09E-05 | 0.000422 | 1.00556  |
| SLC38A7  | 0.689108 | 4.515347 | 4.097348 | 6.10E-05 | 0.000422 | 1.146543 |
| CTPS     | 1.016801 | 5.320927 | 4.09732  | 6.10E-05 | 0.000422 | 1.065846 |
| PTDSS1   | 0.890692 | 6.568918 | 4.096708 | 6.11E-05 | 0.000423 | 0.940262 |
| 2-Mar    | -0.76471 | 4.072666 | -4.09389 | 6.18E-05 | 0.000428 | 1.01431  |
|          | -1.16156 | 5.612489 | -4.09255 | 6.22E-05 | 0.00043  | 0.901943 |
| GALNT10  | -0.60049 | 6.263937 | -4.09212 | 6.23E-05 | 0.00043  | 0.899162 |
| HSD17B4  | 0.529926 | 5.416449 | 4.091722 | 6.24E-05 | 0.000431 | 0.985282 |
| GPN1     | -0.84508 | 3.136266 | -4.09062 | 6.26E-05 | 0.000432 | 1.125347 |
| LDLRAD2  | 1.125342 | 6.006872 | 4.088829 | 6.31E-05 | 0.000435 | 0.970347 |
| VAV2     | -0.50291 | 3.471636 | -4.08787 | 6.33E-05 | 0.000436 | 1.107504 |
| COQ6     | -0.81194 | 5.6938   | -4.08788 | 6.33E-05 | 0.000436 | 0.885486 |
| ZNF33A   | 1.038122 | 4.367088 | 4.08682  | 6.36E-05 | 0.000438 | 1.190463 |
| RFC5     | 0.799008 | 8.458054 | 4.086753 | 6.36E-05 | 0.000438 | 0.894511 |
| HSPD1    |          |          |          |          |          |          |

|         |          |          |          |          |          |          |
|---------|----------|----------|----------|----------|----------|----------|
| MAPK1   | -0.56863 | 7.696554 | -4.08531 | 6.40E-05 | 0.00044  | 0.900572 |
| PPP1CA  | 0.75204  | 7.011983 | 4.084663 | 6.41E-05 | 0.000441 | 0.874734 |
| ACTA2   | -1.89801 | 7.186865 | -4.08239 | 6.47E-05 | 0.000445 | 0.910857 |
| LGALS8  | 0.613663 | 5.734812 | 4.081506 | 6.49E-05 | 0.000446 | 0.9241   |
| CREBL2  | -0.64821 | 5.57886  | -4.07813 | 6.58E-05 | 0.000452 | 0.854361 |
| UBXN6   | -0.62964 | 5.602606 | -4.07774 | 6.59E-05 | 0.000453 | 0.85262  |
| ARID5B  | -1.04648 | 6.32992  | -4.07731 | 6.60E-05 | 0.000453 | 0.849839 |
| FANCG   | 1.009097 | 3.956512 | 4.076892 | 6.61E-05 | 0.000454 | 1.220101 |
| RHOBTB2 | -1.05291 | 4.53386  | -4.07675 | 6.62E-05 | 0.000454 | 0.885063 |
| PDLIM3  | -1.8154  | 4.836134 | -4.07644 | 6.63E-05 | 0.000454 | 0.846444 |
| MAZ     | 0.705086 | 7.879719 | 4.075944 | 6.64E-05 | 0.000455 | 0.844098 |
| RANGAP1 | 0.677715 | 7.170771 | 4.075136 | 6.66E-05 | 0.000456 | 0.835795 |
| COLEC12 | -1.90074 | 2.204701 | -4.07344 | 6.70E-05 | 0.000459 | 1.061769 |
| HERPUD1 | -1.03808 | 6.64237  | -4.07303 | 6.72E-05 | 0.000459 | 0.83913  |
| ZNF33B  | -0.76432 | 5.016877 | -4.0721  | 6.74E-05 | 0.000461 | 0.85196  |
| SSRP1   | 0.61338  | 7.520272 | 4.071263 | 6.76E-05 | 0.000462 | 0.822346 |
| IP6K1   | -0.56474 | 5.834188 | -4.07085 | 6.77E-05 | 0.000463 | 0.822504 |
| BSN     | -1.45605 | 0.548788 | -4.06486 | 6.94E-05 | 0.000473 | 1.335395 |
| CENPQ   | 1.132149 | 2.803529 | 4.064219 | 6.95E-05 | 0.000474 | 1.336718 |
| TIGD1   | 1.059955 | 2.855728 | 4.062844 | 6.99E-05 | 0.000477 | 1.319575 |
| SLBP    | 0.71659  | 5.801747 | 4.061392 | 7.03E-05 | 0.000479 | 0.851271 |
| COL7A1  | 3.504112 | 6.571977 | 4.059775 | 7.08E-05 | 0.000482 | 1.106863 |
| NDUFA10 | -0.57898 | 6.364591 | -4.0588  | 7.10E-05 | 0.000484 | 0.774738 |
| COBL    | -2.60064 | 4.408253 | -4.05861 | 7.11E-05 | 0.000484 | 0.784107 |
| EIF3L   | -0.67788 | 7.79951  | -4.0578  | 7.13E-05 | 0.000485 | 0.803455 |
| TRIOBP  | -0.70125 | 6.421179 | -4.05763 | 7.14E-05 | 0.000485 | 0.772376 |
| POLR2D  | 0.628547 | 4.956609 | 4.05558  | 7.20E-05 | 0.000489 | 0.91183  |
| NFASC   | -1.68661 | 3.877741 | -4.05379 | 7.25E-05 | 0.000492 | 0.810073 |
| ZNF763  | -1.2478  | 0.159223 | -4.05278 | 7.28E-05 | 0.000494 | 1.344447 |
| VILL    | -2.1429  | 3.613992 | -4.05251 | 7.28E-05 | 0.000494 | 0.803333 |
| SAPS2   | -0.54713 | 5.754842 | -4.05081 | 7.33E-05 | 0.000497 | 0.749607 |
| CYP20A1 | -0.69789 | 5.198211 | -4.05014 | 7.35E-05 | 0.000498 | 0.762988 |
| ZNF671  | -1.13313 | 1.311275 | -4.04845 | 7.40E-05 | 0.000501 | 1.221452 |
| ZNF710  | -0.73282 | 4.989937 | -4.04833 | 7.40E-05 | 0.000501 | 0.766281 |
| CYS1    | -1.59115 | 1.055287 | -4.04808 | 7.41E-05 | 0.000502 | 1.200136 |
| FBXW4   | -0.6624  | 5.28666  | -4.04715 | 7.44E-05 | 0.000503 | 0.749002 |
| FAM122A | -0.59635 | 4.607883 | -4.04656 | 7.46E-05 | 0.000504 | 0.798116 |
| CD59    | -0.99703 | 8.416671 | -4.04641 | 7.46E-05 | 0.000504 | 0.789071 |
| EFNA4   | 1.275621 | 3.527431 | 4.045963 | 7.47E-05 | 0.000505 | 1.203881 |
| ANKRD43 | -2.26055 | 0.921168 | -4.04521 | 7.50E-05 | 0.000506 | 1.135059 |
| MT1E    | -1.94433 | 4.345241 | -4.04506 | 7.50E-05 | 0.000506 | 0.740241 |
| GPRC5C  | -1.85679 | 4.917557 | -4.04477 | 7.51E-05 | 0.000507 | 0.726965 |
| FTSJ2   | 0.699853 | 4.805123 | 4.044515 | 7.52E-05 | 0.000507 | 0.902192 |
| MMRN2   | -1.09578 | 4.509306 | -4.04357 | 7.54E-05 | 0.000508 | 0.760081 |
| ACOX1   | -0.9641  | 6.548505 | -4.04338 | 7.55E-05 | 0.000509 | 0.725221 |
| PHKB    | -0.71834 | 6.408612 | -4.04096 | 7.62E-05 | 0.000513 | 0.710253 |
| CHPT1   | -1.36229 | 4.887638 | -4.04022 | 7.64E-05 | 0.000515 | 0.716958 |
| QSOX1   | -1.25986 | 7.565775 | -4.03373 | 7.84E-05 | 0.000528 | 0.722925 |
| PTRH2   | 0.868553 | 4.200554 | 4.033244 | 7.86E-05 | 0.000528 | 0.993835 |
| PA2G4   | 0.682196 | 7.171025 | 4.032922 | 7.87E-05 | 0.000529 | 0.678141 |
| MKNK2   | -1.04208 | 7.560854 | -4.0328  | 7.87E-05 | 0.000529 | 0.713053 |
| EGFL8   | -1.08367 | 1.437753 | -4.03187 | 7.90E-05 | 0.00053  | 1.150416 |
| SNRK    | -0.75009 | 5.632158 | -4.03182 | 7.90E-05 | 0.00053  | 0.677929 |
| MYO1C   | -0.66345 | 8.018498 | -4.03076 | 7.93E-05 | 0.000532 | 0.709122 |
| SNRPD3  | 0.635361 | 6.159897 | 4.030499 | 7.94E-05 | 0.000533 | 0.702586 |
| GLA     | 1.078442 | 4.530444 | 4.029261 | 7.98E-05 | 0.000535 | 0.952984 |
| RAP1GAP | -1.83789 | 4.561209 | -4.02881 | 8.00E-05 | 0.000536 | 0.674747 |
| ATP6V1H | -0.56384 | 5.60074  | -4.02831 | 8.01E-05 | 0.000536 | 0.669825 |



|            |          |          |          |          |          |          |
|------------|----------|----------|----------|----------|----------|----------|
| EPT1       | 0.844298 | 6.742595 | 4.026755 | 8.06E-05 | 0.000539 | 0.668704 |
| C11orf92   | -2.14231 | 2.608094 | -4.02645 | 8.07E-05 | 0.00054  | 0.808507 |
| ZNF248     | -0.65772 | 3.651691 | -4.02478 | 8.12E-05 | 0.000543 | 0.820645 |
| ST6GALNAC1 | -2.65718 | 3.343361 | -4.02455 | 8.13E-05 | 0.000543 | 0.694819 |
| CAPG       | 1.135256 | 6.367331 | 4.023949 | 8.15E-05 | 0.000544 | 0.697021 |
| KHDRBS1    | 0.382059 | 7.314851 | 4.023392 | 8.17E-05 | 0.000545 | 0.643658 |
| NR2F1      | -1.20542 | 3.026449 | -4.02021 | 8.27E-05 | 0.000552 | 0.828569 |
| NXT1       | 0.810813 | 4.321278 | 4.018232 | 8.33E-05 | 0.000556 | 0.905971 |
| CRYAB      | -2.00889 | 3.678902 | -4.01546 | 8.43E-05 | 0.000562 | 0.665099 |
| ZNF420     | -1.40496 | 1.448758 | -4.01479 | 8.45E-05 | 0.000563 | 1.045498 |
| TUB        | -1.93506 | 1.350708 | -4.01436 | 8.46E-05 | 0.000564 | 0.986196 |
| SLC5A6     | 1.12808  | 5.581265 | 4.014173 | 8.47E-05 | 0.000564 | 0.737937 |
| GMPPB      | -0.78253 | 3.740393 | -4.01382 | 8.48E-05 | 0.000564 | 0.755109 |
| GOT1       | -0.77406 | 5.854198 | -4.01386 | 8.48E-05 | 0.000564 | 0.607554 |
| PDIA4      | 0.848579 | 7.723811 | 4.013551 | 8.49E-05 | 0.000564 | 0.607385 |
| HOXA1      | 2.308175 | 2.155965 | 4.01273  | 8.52E-05 | 0.000566 | 1.271083 |
| FBXO3      | -0.64623 | 5.015029 | -4.01262 | 8.52E-05 | 0.000566 | 0.636572 |
| C20orf27   | 1.013386 | 4.909892 | 4.01184  | 8.55E-05 | 0.000567 | 0.81081  |
| YEATS2     | 1.002784 | 6.448838 | 4.011626 | 8.55E-05 | 0.000567 | 0.636167 |
| ARHGEF15   | -1.17394 | 2.534111 | -4.01026 | 8.60E-05 | 0.00057  | 0.883043 |
| COQ9       | -0.624   | 5.615288 | -4.00837 | 8.66E-05 | 0.000574 | 0.593893 |
| USP4       | -0.49472 | 5.546863 | -4.00734 | 8.70E-05 | 0.000576 | 0.596067 |
| SPAST      | 0.732575 | 5.352706 | 4.004315 | 8.80E-05 | 0.000583 | 0.685862 |
| LOC92659   | 1.521015 | 1.561853 | 4.004169 | 8.81E-05 | 0.000583 | 1.236066 |
| ST6GALNAC3 | -1.4101  | 0.821827 | -4.00366 | 8.82E-05 | 0.000584 | 1.087506 |
| MRPL14     | 0.993948 | 5.096619 | 4.003216 | 8.84E-05 | 0.000584 | 0.74631  |
| TOMM34     | 0.838082 | 5.654626 | 4.003275 | 8.84E-05 | 0.000584 | 0.660119 |
| C14orf143  | 0.822492 | 1.874122 | 4.002253 | 8.87E-05 | 0.000586 | 1.17099  |
| CCDC21     | 0.962051 | 4.539659 | 4.001893 | 8.88E-05 | 0.000587 | 0.832438 |
| UQCRC1     | -0.65793 | 7.300848 | -4.00152 | 8.90E-05 | 0.000587 | 0.579904 |
| MTL5       | 2.639856 | 2.544389 | 4.001353 | 8.90E-05 | 0.000587 | 1.227923 |
| CCDC48     | -1.48065 | 0.759226 | -4.00079 | 8.92E-05 | 0.000588 | 1.07756  |
| FKBP1A     | 0.581351 | 7.921623 | 4.000766 | 8.92E-05 | 0.000588 | 0.566887 |
| DNAJB5     | -1.38586 | 3.350285 | -4.00026 | 8.94E-05 | 0.000589 | 0.689388 |
| RTN4R      | 1.859994 | 3.263579 | 4.000028 | 8.95E-05 | 0.000589 | 1.123426 |
| FLJ35390   | -1.09084 | 1.201497 | -3.9998  | 8.96E-05 | 0.00059  | 1.06101  |
| MAPRE1     | 0.488662 | 7.21292  | 3.999154 | 8.98E-05 | 0.000591 | 0.552313 |
| RORC       | -2.51412 | 1.338415 | -3.99882 | 8.99E-05 | 0.000591 | 0.860664 |
| PRR19      | 1.626316 | 0.5833   | 3.998324 | 9.01E-05 | 0.000592 | 1.238224 |
| C9orf7     | -1.0878  | 4.270653 | -3.99721 | 9.05E-05 | 0.000594 | 0.608971 |
| INSIG1     | -1.15951 | 5.747372 | -3.9963  | 9.08E-05 | 0.000596 | 0.543184 |
| B3GALNT2   | -0.65457 | 5.881234 | -3.994   | 9.16E-05 | 0.000601 | 0.534794 |
| LOC401093  | -1.3977  | 2.133977 | -3.99221 | 9.23E-05 | 0.000605 | 0.849078 |
| FSCN1      | 2.476845 | 7.877044 | 3.992194 | 9.23E-05 | 0.000605 | 0.563044 |
| IGFBP2     | -2.3611  | 6.510827 | -3.99206 | 9.23E-05 | 0.000605 | 0.567658 |
| KIAA1143   | -0.61915 | 5.129053 | -3.98959 | 9.32E-05 | 0.000611 | 0.545858 |
| UQCRC2     | -0.64114 | 7.047505 | -3.98648 | 9.44E-05 | 0.000618 | 0.518319 |
| FBLN5      | -1.32734 | 4.376002 | -3.98563 | 9.47E-05 | 0.00062  | 0.541266 |
| C16orf93   | 1.150733 | 0.598376 | 3.984775 | 9.50E-05 | 0.000621 | 1.188742 |
| PRKCB      | -1.46103 | 2.653441 | -3.98459 | 9.51E-05 | 0.000621 | 0.720662 |
| IFITM1     | 1.675217 | 6.991426 | 3.983285 | 9.55E-05 | 0.000624 | 0.538279 |
| GGH        | 1.771456 | 5.139383 | 3.982488 | 9.58E-05 | 0.000626 | 0.787324 |
| VPS37C     | -0.58865 | 5.361559 | -3.98239 | 9.59E-05 | 0.000626 | 0.508651 |
| TPSAB1     | -1.75124 | 3.85375  | -3.97965 | 9.69E-05 | 0.000632 | 0.534303 |
| TMEM138    | 0.660248 | 5.024644 | 3.978832 | 9.72E-05 | 0.000634 | 0.623736 |
| CCNY       | -0.55802 | 6.023436 | -3.97803 | 9.75E-05 | 0.000636 | 0.475169 |
| RPL3       | -0.70086 | 9.622717 | -3.97747 | 9.77E-05 | 0.000637 | 0.562922 |
| RHOB       | -1.2657  | 7.869266 | -3.97743 | 9.77E-05 | 0.000637 | 0.524423 |

|              |          |          |          |          |          |          |
|--------------|----------|----------|----------|----------|----------|----------|
| GNPDA2       | -0.76867 | 3.917428 | -3.97724 | 9.78E-05 | 0.000637 | 0.597948 |
| TAF1A        | 0.889219 | 2.566042 | 3.975919 | 9.83E-05 | 0.00064  | 1.01829  |
| VPS11        | -0.55844 | 5.230573 | -3.97583 | 9.84E-05 | 0.00064  | 0.49239  |
| CABC1        | -1.21547 | 5.291231 | -3.97511 | 9.86E-05 | 0.000641 | 0.468345 |
| TGFBR2       | -1.41583 | 6.84954  | -3.97455 | 9.88E-05 | 0.000642 | 0.487016 |
| PITPNC1      | -0.96484 | 3.755087 | -3.97349 | 9.93E-05 | 0.000645 | 0.585478 |
| ISG15        | 2.56396  | 5.629301 | 3.972341 | 9.97E-05 | 0.000647 | 0.795796 |
| FIGN         | -2.00008 | 0.045361 | -3.97213 | 9.98E-05 | 0.000648 | 1.001677 |
| RNF220       | 0.435156 | 5.685841 | 3.971418 | 0.0001   | 0.000649 | 0.506079 |
| HDAC5        | -0.69455 | 5.682931 | -3.97065 | 0.0001   | 0.000651 | 0.451737 |
| RAD51L1      | 1.071437 | 1.875633 | 3.969822 | 0.000101 | 0.000652 | 1.07236  |
| IKZF5        | -0.51259 | 4.742415 | -3.96984 | 0.000101 | 0.000652 | 0.509061 |
| MRPL13       | 0.767239 | 5.084576 | 3.969424 | 0.000101 | 0.000653 | 0.593856 |
| GJB7         | 3.106397 | -0.67713 | 3.968455 | 0.000101 | 0.000655 | 1.135078 |
| PRPF4        | 0.787585 | 5.512034 | 3.966989 | 0.000102 | 0.000658 | 0.536616 |
| PYCRL        | 1.146222 | 4.144753 | 3.9662   | 0.000102 | 0.00066  | 0.803674 |
| HSP90AA1     | 0.744373 | 10.196   | 3.963456 | 0.000103 | 0.000667 | 0.489822 |
| BICD1        | 1.316798 | 3.322662 | 3.96331  | 0.000103 | 0.000667 | 0.930824 |
| CYP2U1       | -1.1665  | 2.641638 | -3.96259 | 0.000104 | 0.000669 | 0.688743 |
| SETMAR       | -0.73722 | 2.87714  | -3.96111 | 0.000104 | 0.000672 | 0.708447 |
| RGS19        | 1.222701 | 3.797433 | 3.960542 | 0.000104 | 0.000673 | 0.84799  |
| TECPR1       | -0.7869  | 4.177974 | -3.9606  | 0.000104 | 0.000673 | 0.507398 |
| PRPF40A      | 0.430732 | 7.405963 | 3.960617 | 0.000104 | 0.000673 | 0.412831 |
| VSTM2L       | -2.02803 | 0.414297 | -3.95997 | 0.000105 | 0.000674 | 0.915524 |
| PWWP2A       | -0.53837 | 4.333442 | -3.95957 | 0.000105 | 0.000675 | 0.509188 |
| FAR1         | -0.76147 | 7.084548 | -3.95933 | 0.000105 | 0.000675 | 0.42181  |
| B3GNT5       | 1.420688 | 6.786146 | 3.957223 | 0.000106 | 0.00068  | 0.439868 |
| LOC387647    | -0.6246  | 4.012621 | -3.95534 | 0.000106 | 0.000685 | 0.521871 |
| PHF5A        | 0.654305 | 4.14222  | 3.954822 | 0.000107 | 0.000686 | 0.681618 |
| TPM1         | -1.28287 | 7.134767 | -3.95473 | 0.000107 | 0.000686 | 0.418953 |
| LOC100130776 | 1.801128 | 3.460532 | 3.951679 | 0.000108 | 0.000694 | 0.92287  |
| TUSC2        | -0.66894 | 3.907934 | -3.95152 | 0.000108 | 0.000694 | 0.516448 |
| ICOS         | 2.23132  | 0.524485 | 3.951375 | 0.000108 | 0.000694 | 1.074749 |
| GIMAP7       | -1.24254 | 2.041298 | -3.95025 | 0.000109 | 0.000696 | 0.740035 |
| MBD5         | -0.7872  | 3.920905 | -3.95022 | 0.000109 | 0.000696 | 0.49738  |
| ALG1L        | 3.400403 | 1.578258 | 3.950045 | 0.000109 | 0.000696 | 1.069237 |
| CCDC18       | 1.256225 | 2.540478 | 3.94945  | 0.000109 | 0.000697 | 0.95823  |
| AHCY         | 0.729396 | 7.658923 | 3.949474 | 0.000109 | 0.000697 | 0.372055 |
| RNF149       | 0.645068 | 6.11128  | 3.949278 | 0.000109 | 0.000697 | 0.407388 |
| FAM8A1       | -0.66341 | 5.581085 | -3.94851 | 0.000109 | 0.000699 | 0.373896 |
| MYCT1        | -1.12048 | 2.023989 | -3.94748 | 0.00011  | 0.000702 | 0.751819 |
| CYBA         | 1.329302 | 6.577246 | 3.947415 | 0.00011  | 0.000702 | 0.413711 |
| ACBD4        | -1.00112 | 2.346397 | -3.94699 | 0.00011  | 0.000702 | 0.712967 |
| PARP1        | 0.652819 | 7.5008   | 3.946688 | 0.00011  | 0.000703 | 0.360781 |
| CTHRC1       | 3.52177  | 4.624883 | 3.944692 | 0.000111 | 0.000708 | 0.941819 |
| CCDC34       | 1.503801 | 3.685856 | 3.943423 | 0.000112 | 0.000711 | 0.838015 |
| CCT7         | 0.548828 | 7.64803  | 3.942629 | 0.000112 | 0.000713 | 0.34916  |
| EIF4EBP2     | -0.63535 | 7.724235 | -3.94179 | 0.000112 | 0.000715 | 0.371815 |
| ROD1         | 0.72335  | 8.237945 | 3.941137 | 0.000113 | 0.000716 | 0.351928 |
| ZNF571       | -1.29747 | 1.180295 | -3.93848 | 0.000114 | 0.000724 | 0.820508 |
| ST20         | 1.144167 | 1.211852 | 3.937258 | 0.000114 | 0.000727 | 1.001063 |
| PPFIBP2      | -1.14998 | 5.045047 | -3.93705 | 0.000114 | 0.000727 | 0.337224 |
| MTR          | -0.71639 | 5.738959 | -3.93667 | 0.000114 | 0.000728 | 0.326082 |
| TREM1        | 2.874137 | 0.638637 | 3.935102 | 0.000115 | 0.000732 | 1.018322 |
| UBE2A        | 0.576254 | 6.255305 | 3.934791 | 0.000115 | 0.000732 | 0.341542 |
| TSHZ2        | -1.39169 | 3.16201  | -3.93442 | 0.000115 | 0.000733 | 0.470985 |
| SH3BP5       | -0.95873 | 4.246408 | -3.93421 | 0.000116 | 0.000733 | 0.38857  |
| C11orf2      | -0.6529  | 6.480094 | -3.9342  | 0.000116 | 0.000733 | 0.317092 |

|            |          |          |          |          |          |          |
|------------|----------|----------|----------|----------|----------|----------|
| MTERFD1    | 0.898013 | 4.032615 | 3.933032 | 0.000116 | 0.000736 | 0.662085 |
| GSPT2      | -1.49769 | 1.650644 | -3.9329  | 0.000116 | 0.000736 | 0.702907 |
| ATP6V0E2   | -1.45346 | 3.210969 | -3.93202 | 0.000117 | 0.000738 | 0.450973 |
| DNAJC2     | 0.848538 | 5.506234 | 3.932135 | 0.000116 | 0.000738 | 0.416572 |
| MPDZ       | -1.39873 | 3.550707 | -3.93122 | 0.000117 | 0.00074  | 0.411405 |
| USP16      | -0.54169 | 5.418037 | -3.93087 | 0.000117 | 0.00074  | 0.319278 |
| TMEM110    | -0.604   | 2.76921  | -3.93057 | 0.000117 | 0.000741 | 0.640051 |
| HNRNPF     | 0.510153 | 7.821837 | 3.929641 | 0.000118 | 0.000743 | 0.305469 |
| RUNX1T1    | -1.56694 | 0.425602 | -3.92913 | 0.000118 | 0.000744 | 0.846572 |
| SLC12A8    | 1.603402 | 4.417243 | 3.92596  | 0.000119 | 0.000753 | 0.686237 |
| PRRT1      | -1.12412 | 1.041032 | -3.92512 | 0.00012  | 0.000755 | 0.806993 |
| C4orf21    | 1.140855 | 3.255633 | 3.924998 | 0.00012  | 0.000755 | 0.783732 |
| HELQ       | -0.49028 | 3.108927 | -3.9248  | 0.00012  | 0.000756 | 0.575253 |
| PHYH       | -1.11735 | 4.089367 | -3.92335 | 0.000121 | 0.000759 | 0.353009 |
| CST3       | -1.06262 | 8.254094 | -3.92275 | 0.000121 | 0.000761 | 0.331129 |
| KHNYN      | -0.57316 | 6.687391 | -3.92209 | 0.000121 | 0.000762 | 0.274999 |
| RIOK2      | -0.48119 | 4.173292 | -3.92171 | 0.000121 | 0.000763 | 0.39501  |
| CBR4       | -0.59898 | 4.077262 | -3.92159 | 0.000121 | 0.000763 | 0.393567 |
| HOXC13     | 4.302632 | 1.319372 | 3.921027 | 0.000122 | 0.000764 | 0.969123 |
| SARDH      | -1.7067  | 0.282515 | -3.92107 | 0.000122 | 0.000764 | 0.823368 |
| TMEM194A   | 0.966799 | 5.421542 | 3.919748 | 0.000122 | 0.000768 | 0.393472 |
| NCRNA00219 | -0.77376 | 2.842193 | -3.91935 | 0.000122 | 0.000768 | 0.558367 |
| PAQR8      | -1.9966  | 4.678101 | -3.91891 | 0.000123 | 0.000769 | 0.266404 |
| FGF7       | -1.6016  | 2.278958 | -3.9184  | 0.000123 | 0.00077  | 0.524113 |
| FGFR1      | -1.55123 | 5.035876 | -3.91843 | 0.000123 | 0.00077  | 0.262191 |
| SNRNP40    | 0.668819 | 4.762891 | 3.918027 | 0.000123 | 0.000771 | 0.440668 |
| NLRC5      | 1.343035 | 6.191985 | 3.917257 | 0.000123 | 0.000773 | 0.338898 |
| AP1S1      | 0.988051 | 4.833977 | 3.915699 | 0.000124 | 0.000777 | 0.471286 |
| UBE2D1     | 0.624857 | 4.981346 | 3.914532 | 0.000125 | 0.00078  | 0.389991 |
| CTSZ       | 0.964693 | 6.614396 | 3.914628 | 0.000125 | 0.00078  | 0.268692 |
| ITGB4      | 1.327056 | 9.483853 | 3.914345 | 0.000125 | 0.00078  | 0.272737 |
| SLC39A10   | 1.09647  | 4.98032  | 3.913253 | 0.000125 | 0.000783 | 0.454006 |
| INTS8      | 0.682706 | 5.735564 | 3.913241 | 0.000125 | 0.000783 | 0.309588 |
| RAD18      | 0.849637 | 3.733782 | 3.912683 | 0.000126 | 0.000784 | 0.632899 |
| CYP2C9     | -2.55522 | -0.58708 | -3.91099 | 0.000126 | 0.000789 | 0.803424 |
| CCNE1      | 2.124909 | 3.385403 | 3.910388 | 0.000127 | 0.00079  | 0.81375  |
| NR6A1      | 1.450861 | 0.075995 | 3.909926 | 0.000127 | 0.000791 | 0.932269 |
| TDP1       | 0.700055 | 4.211733 | 3.909825 | 0.000127 | 0.000791 | 0.513948 |
| DAXX       | 0.494903 | 5.935142 | 3.909686 | 0.000127 | 0.000791 | 0.266111 |
| S1PR3      | -1.59102 | 4.450949 | -3.90954 | 0.000127 | 0.000791 | 0.2473   |
| FBXO21     | -0.49985 | 5.832954 | -3.90952 | 0.000127 | 0.000791 | 0.229085 |
| CAT        | -0.926   | 5.947031 | -3.90953 | 0.000127 | 0.000791 | 0.225241 |
| HES1       | 0.895823 | 6.374096 | 3.908129 | 0.000128 | 0.000795 | 0.25576  |
| MED30      | 1.034947 | 3.740355 | 3.907294 | 0.000128 | 0.000797 | 0.639421 |
| SUV420H2   | 0.954657 | 3.74719  | 3.905701 | 0.000129 | 0.000802 | 0.62247  |
| NOLC1      | 0.627767 | 7.252436 | 3.904529 | 0.00013  | 0.000805 | 0.206448 |
| LPP        | -0.93833 | 6.917244 | -3.90435 | 0.00013  | 0.000805 | 0.221596 |
| ZNF383     | -0.74332 | 2.176823 | -3.90314 | 0.00013  | 0.000808 | 0.620644 |
| PAFAH1B1   | -0.56132 | 7.173997 | -3.90174 | 0.000131 | 0.000812 | 0.210266 |
| ZNF695     | 2.814594 | 1.062162 | 3.901227 | 0.000131 | 0.000814 | 0.901368 |
| C4orf32    | -0.93749 | 4.091314 | -3.90062 | 0.000131 | 0.000815 | 0.285048 |
| OLR1       | 3.379905 | 1.570239 | 3.899983 | 0.000132 | 0.000817 | 0.896636 |
| TRIM68     | -0.76296 | 3.367905 | -3.89976 | 0.000132 | 0.000817 | 0.396172 |
| LSR        | 1.214355 | 7.673014 | 3.899758 | 0.000132 | 0.000817 | 0.19049  |
| METTL1     | 0.875234 | 3.744558 | 3.899362 | 0.000132 | 0.000818 | 0.587127 |
| BMPR1A     | -0.62065 | 4.891868 | -3.8986  | 0.000133 | 0.00082  | 0.229777 |
| RAPGEF2    | -0.82451 | 5.182229 | -3.89675 | 0.000133 | 0.000825 | 0.195715 |
| STON1      | -1.53087 | 4.009905 | -3.89593 | 0.000134 | 0.000827 | 0.229243 |

|           |          |          |          |          |          |          |
|-----------|----------|----------|----------|----------|----------|----------|
| SGK223    | 1.003023 | 5.905535 | 3.895304 | 0.000134 | 0.000829 | 0.256952 |
| ERMAP     | -0.67557 | 3.800909 | -3.89441 | 0.000135 | 0.000831 | 0.321357 |
| FAM174A   | -0.7925  | 3.451597 | -3.89384 | 0.000135 | 0.000833 | 0.356096 |
| TMEM69    | 0.71785  | 5.235364 | 3.893605 | 0.000135 | 0.000833 | 0.293625 |
| LOC399959 | -1.51813 | 2.40531  | -3.89251 | 0.000136 | 0.000836 | 0.420514 |
| ADAMDEC1  | 3.288756 | 1.517228 | 3.892055 | 0.000136 | 0.000837 | 0.86952  |
| GINS3     | 1.287757 | 3.56163  | 3.892028 | 0.000136 | 0.000837 | 0.643426 |
| GAS7      | -1.53882 | 4.452621 | -3.89182 | 0.000136 | 0.000837 | 0.18522  |
| PTPN6     | 0.847711 | 5.157277 | 3.891369 | 0.000136 | 0.000838 | 0.311144 |
| F8A1      | 0.829164 | 5.255131 | 3.891302 | 0.000136 | 0.000838 | 0.295176 |
| SMNDC1    | 0.449951 | 5.079229 | 3.891274 | 0.000136 | 0.000838 | 0.275621 |
| COG1      | -0.48174 | 5.264157 | -3.88722 | 0.000138 | 0.000851 | 0.171953 |
| ADCY6     | -1.33359 | 5.161052 | -3.88705 | 0.000139 | 0.000851 | 0.149018 |
| SLC25A27  | -1.38776 | 1.754792 | -3.88608 | 0.000139 | 0.000854 | 0.53652  |
| FRMD8     | 0.76409  | 6.304788 | 3.885333 | 0.000139 | 0.000856 | 0.169857 |
| FLVCR2    | 2.146627 | 2.606463 | 3.884686 | 0.00014  | 0.000857 | 0.789702 |
| TTC26     | 0.980132 | 2.180362 | 3.884743 | 0.00014  | 0.000857 | 0.740356 |
| IL4I1     | 1.701912 | 2.720379 | 3.884133 | 0.00014  | 0.000859 | 0.747437 |
| WDFY3     | -0.69135 | 6.127848 | -3.88379 | 0.00014  | 0.000859 | 0.131696 |
| ZC3H12A   | 1.468525 | 6.22541  | 3.882301 | 0.000141 | 0.000864 | 0.220783 |
| C6orf129  | 0.945041 | 3.328603 | 3.881134 | 0.000142 | 0.000867 | 0.596136 |
| SOS2      | -0.62301 | 5.862056 | -3.88112 | 0.000142 | 0.000867 | 0.124063 |
| RPLP0P2   | 3.259238 | 1.414231 | 3.880499 | 0.000142 | 0.000868 | 0.8301   |
| ROM1      | -0.79229 | 0.694454 | -3.88052 | 0.000142 | 0.000868 | 0.715874 |
| TMBIM6    | -0.62727 | 9.838962 | -3.87998 | 0.000142 | 0.00087  | 0.21364  |
| CLIC1     | 0.815899 | 8.042084 | 3.879505 | 0.000143 | 0.000871 | 0.123323 |
| TNRC6A    | -0.47174 | 6.170409 | -3.87922 | 0.000143 | 0.000872 | 0.115127 |
| NEDD1     | 0.786117 | 4.984232 | 3.87891  | 0.000143 | 0.000872 | 0.282328 |
| KLHL36    | -0.60295 | 4.395163 | -3.87805 | 0.000143 | 0.000875 | 0.201612 |
| MPPE1     | -0.58256 | 4.475403 | -3.87658 | 0.000144 | 0.000879 | 0.189805 |
| PDSS1     | 1.279259 | 3.168346 | 3.875538 | 0.000145 | 0.000882 | 0.63323  |
| CACHD1    | -1.28499 | 4.011906 | -3.87539 | 0.000145 | 0.000882 | 0.173144 |
| ZNF354C   | -1.64934 | 0.106064 | -3.87491 | 0.000145 | 0.000883 | 0.680327 |
| BYSL      | 1.022022 | 4.403267 | 3.874767 | 0.000145 | 0.000883 | 0.406364 |
| TATDN3    | -0.56708 | 3.112704 | -3.87477 | 0.000145 | 0.000883 | 0.383111 |
| AP2S1     | 0.751036 | 5.936604 | 3.875047 | 0.000145 | 0.000883 | 0.159474 |
| PSMB9     | 1.939037 | 5.22406  | 3.872021 | 0.000147 | 0.000892 | 0.404052 |
| ENPP2     | -1.44838 | 3.637569 | -3.87191 | 0.000147 | 0.000892 | 0.185199 |
| MTMR6     | -0.63505 | 5.357754 | -3.87172 | 0.000147 | 0.000892 | 0.104758 |
| KIF24     | 1.25127  | 3.629336 | 3.871227 | 0.000147 | 0.000893 | 0.557892 |
| ADSSL1    | -1.36276 | 2.092212 | -3.87093 | 0.000147 | 0.000894 | 0.428111 |
| C21orf63  | -1.16429 | 3.705939 | -3.87086 | 0.000147 | 0.000894 | 0.199277 |
| DCTN2     | -0.53843 | 6.482846 | -3.87093 | 0.000147 | 0.000894 | 0.086852 |
| TAF2      | 0.608841 | 6.101103 | 3.86852  | 0.000149 | 0.000901 | 0.113499 |
| ABCA10    | -1.68466 | -0.01736 | -3.86822 | 0.000149 | 0.000902 | 0.668709 |
| ZNF267    | 0.860261 | 4.537062 | 3.868042 | 0.000149 | 0.000902 | 0.331639 |
| MAGEH1    | -1.11703 | 2.514291 | -3.86733 | 0.000149 | 0.000904 | 0.377667 |
| HAUS6     | 0.816543 | 4.777606 | 3.867362 | 0.000149 | 0.000904 | 0.279239 |
| 6-Sep     | -1.0442  | 4.665174 | -3.86589 | 0.00015  | 0.000908 | 0.102528 |
|           | 0.545432 | 6.912604 | 3.865936 | 0.00015  | 0.000908 | 0.069444 |
|           | 1.098461 | 3.765676 | 3.865723 | 0.00015  | 0.000908 | 0.496078 |
|           | -0.86536 | 5.386482 | -3.86509 | 0.000151 | 0.00091  | 0.072926 |
|           | -0.69357 | 6.756199 | -3.86424 | 0.000151 | 0.000912 | 0.069323 |
|           | 0.788937 | 4.989312 | 3.864065 | 0.000151 | 0.000913 | 0.22908  |
|           | -0.83078 | 6.397129 | -3.86362 | 0.000151 | 0.000914 | 0.063352 |
|           | -1.73186 | -0.03603 | -3.86304 | 0.000152 | 0.000915 | 0.646556 |
|           | -0.47547 | 6.468337 | -3.86298 | 0.000152 | 0.000915 | 0.057535 |
|           | 0.98006  | 3.629194 | 3.860171 | 0.000153 | 0.000924 | 0.481912 |

|              |          |          |          |          |          |          |
|--------------|----------|----------|----------|----------|----------|----------|
| PAPSS1       | -0.64146 | 5.732966 | -3.86014 | 0.000153 | 0.000924 | 0.050852 |
| CADPS2       | -1.53714 | 4.310274 | -3.86    | 0.000154 | 0.000924 | 0.079427 |
| L3MBTL4      | -2.06412 | 0.390191 | -3.85906 | 0.000154 | 0.000927 | 0.553984 |
| CEP135       | 1.01693  | 3.850799 | 3.855036 | 0.000156 | 0.000941 | 0.433546 |
| PLSCR1       | 0.94696  | 6.529976 | 3.854955 | 0.000157 | 0.000941 | 0.057562 |
| JUB          | 1.608789 | 5.385971 | 3.854551 | 0.000157 | 0.000942 | 0.252914 |
| PVRL1        | 1.889777 | 7.815263 | 3.853672 | 0.000157 | 0.000945 | 0.035602 |
| BLCAP        | 0.746323 | 6.427664 | 3.852984 | 0.000158 | 0.000947 | 0.045647 |
| NAT10        | 0.656321 | 6.256874 | 3.852825 | 0.000158 | 0.000947 | 0.049989 |
| TSTD2        | -0.54057 | 4.517644 | -3.85181 | 0.000158 | 0.00095  | 0.100592 |
| KRBA2        | -0.93841 | 1.578857 | -3.85032 | 0.000159 | 0.000955 | 0.496192 |
| ROR2         | -1.67441 | 3.376697 | -3.84979 | 0.00016  | 0.000957 | 0.1142   |
| RUSC2        | -0.92389 | 4.841719 | -3.84932 | 0.00016  | 0.000958 | 0.038545 |
| TIMM8A       | 0.76157  | 2.887567 | 3.84817  | 0.000161 | 0.000962 | 0.514632 |
| RAMP1        | -1.61212 | 2.575415 | -3.84781 | 0.000161 | 0.000962 | 0.221353 |
| HTT          | -0.68612 | 7.044337 | -3.8479  | 0.000161 | 0.000962 | 0.016419 |
| YWHAB        | 0.487329 | 8.953344 | 3.847407 | 0.000161 | 0.000963 | 0.038353 |
| PFKP         | 0.902224 | 7.025633 | 3.847312 | 0.000161 | 0.000963 | 0.007513 |
| GNL2         | 0.611799 | 5.796412 | 3.845733 | 0.000162 | 0.000969 | 0.055609 |
| ELMOD3       | -0.4913  | 3.455321 | -3.84503 | 0.000163 | 0.000971 | 0.227059 |
| YWHAG        | 0.712193 | 7.794427 | 3.843954 | 0.000163 | 0.000975 | -0.00685 |
| SNAPC3       | -0.62716 | 4.613043 | -3.84345 | 0.000164 | 0.000976 | 0.054789 |
| CXCL16       | 1.150512 | 6.622603 | 3.842287 | 0.000164 | 0.00098  | 0.018697 |
| SNX2         | -0.53659 | 5.647274 | -3.84226 | 0.000164 | 0.00098  | -0.00851 |
| C10orf4      | -0.54888 | 3.671871 | -3.84156 | 0.000165 | 0.000982 | 0.167837 |
| OAS2         | 1.552702 | 6.910374 | 3.83913  | 0.000166 | 0.00099  | 0.013921 |
| CLOCK        | -0.77455 | 5.023156 | -3.83794 | 0.000167 | 0.000994 | -0.00513 |
| WRAP53       | 0.803294 | 3.326627 | 3.837657 | 0.000167 | 0.000995 | 0.424334 |
| C21orf58     | 1.408919 | 2.4792   | 3.837462 | 0.000167 | 0.000995 | 0.583314 |
| NDUFB8       | -0.59313 | 5.517195 | -3.83596 | 0.000168 | 0.001001 | -0.02816 |
| MKLN1        | -0.53688 | 6.353993 | -3.83527 | 0.000169 | 0.001003 | -0.04195 |
| RPS19        | 0.735095 | 8.483569 | 3.833796 | 0.00017  | 0.001008 | -0.0297  |
| PI4KA        | -0.63751 | 6.873737 | -3.83193 | 0.000171 | 0.001015 | -0.04486 |
| ZNF565       | -0.67434 | 1.874979 | -3.83096 | 0.000171 | 0.001018 | 0.420036 |
| PDHA1        | -0.71123 | 6.243936 | -3.8304  | 0.000172 | 0.00102  | -0.05864 |
| BRMS1        | 0.796714 | 5.200359 | 3.830007 | 0.000172 | 0.001021 | 0.079942 |
| CYTSB        | -0.91668 | 4.802246 | -3.82948 | 0.000172 | 0.001022 | -0.02904 |
| CCDC137      | 0.673898 | 4.79071  | 3.82875  | 0.000173 | 0.001025 | 0.117084 |
| SREBF1       | 0.939401 | 7.358254 | 3.828401 | 0.000173 | 0.001026 | -0.06526 |
| RBL2         | -0.6336  | 6.652879 | -3.82643 | 0.000174 | 0.001033 | -0.06839 |
| RAD21        | 0.659048 | 8.153978 | 3.825408 | 0.000175 | 0.001037 | -0.06537 |
| KRI1         | 0.685515 | 5.111643 | 3.823094 | 0.000177 | 0.001045 | 0.053025 |
| KLF12        | -1.23332 | 3.908035 | -3.82304 | 0.000177 | 0.001045 | 0.000496 |
| HNRNPU       | 0.386106 | 8.868583 | 3.820861 | 0.000178 | 0.001053 | -0.056   |
| PSMC2        | 0.682632 | 6.275284 | 3.819527 | 0.000179 | 0.001058 | -0.06824 |
| C3orf23      | -0.64793 | 4.554725 | -3.81899 | 0.000179 | 0.00106  | -0.02855 |
| NOC2L        | 0.674213 | 6.596743 | 3.818718 | 0.00018  | 0.00106  | -0.08745 |
| ABLIM1       | -1.37323 | 8.002599 | -3.81833 | 0.00018  | 0.001061 | -0.04264 |
| RNF160       | -0.55185 | 5.781137 | -3.81735 | 0.00018  | 0.001065 | -0.10116 |
| NASP         | 0.673584 | 6.482266 | 3.816808 | 0.000181 | 0.001067 | -0.08928 |
| PLCXD1       | -1.0932  | 4.488611 | -3.81586 | 0.000181 | 0.00107  | -0.06524 |
| PML          | 0.85281  | 7.497473 | 3.815655 | 0.000182 | 0.00107  | -0.11173 |
| RPP40        | 1.104806 | 2.736922 | 3.815138 | 0.000182 | 0.001072 | 0.451575 |
| PTPN12       | 0.785535 | 6.981059 | 3.815235 | 0.000182 | 0.001072 | -0.10826 |
| LAGE3        | 0.976901 | 3.990907 | 3.81221  | 0.000184 | 0.001083 | 0.252475 |
| ZNF358       | -0.96206 | 5.837003 | -3.81206 | 0.000184 | 0.001083 | -0.12409 |
| DCTN4        | -0.4717  | 6.295723 | -3.81162 | 0.000184 | 0.001085 | -0.12659 |
| LOC100130093 | -0.84246 | 1.581367 | -3.81081 | 0.000185 | 0.001087 | 0.369271 |

|          |          |          |          |          |          |          |
|----------|----------|----------|----------|----------|----------|----------|
| NONO     | 0.543967 | 8.324835 | 3.810762 | 0.000185 | 0.001087 | -0.11135 |
| PMEPA1   | 1.637141 | 6.959813 | 3.809764 | 0.000186 | 0.001091 | -0.0879  |
| CCDC86   | 0.833311 | 5.469804 | 3.809538 | 0.000186 | 0.001091 | -0.021   |
| ZC3H3    | 0.658287 | 6.041005 | 3.807859 | 0.000187 | 0.001098 | -0.095   |
| MAGIX    | -1.36784 | 1.460336 | -3.80747 | 0.000187 | 0.001099 | 0.313401 |
| ZNF280C  | 1.149242 | 3.594133 | 3.806165 | 0.000188 | 0.001104 | 0.319352 |
| CBX4     | 0.735168 | 5.360066 | 3.804512 | 0.000189 | 0.00111  | -0.03617 |
| TMEM66   | -0.63577 | 7.3555   | -3.80422 | 0.00019  | 0.001111 | -0.13255 |
| PLCD4    | -0.87702 | 1.776155 | -3.80357 | 0.00019  | 0.001113 | 0.311325 |
| ESRP1    | 1.564022 | 7.330349 | 3.803249 | 0.00019  | 0.001114 | -0.13686 |
| CTH      | -1.40143 | 1.491208 | -3.80297 | 0.000191 | 0.001115 | 0.288231 |
| STAT5B   | -0.5952  | 6.038775 | -3.80274 | 0.000191 | 0.001115 | -0.15743 |
| TMEM38A  | -1.46657 | 1.474171 | -3.8026  | 0.000191 | 0.001115 | 0.279486 |
| RADIL    | -1.71597 | 0.27586  | -3.80143 | 0.000192 | 0.001119 | 0.400077 |
| RNF123   | -0.55948 | 5.405438 | -3.80144 | 0.000192 | 0.001119 | -0.14495 |
| POLR1B   | 0.703025 | 5.498949 | 3.80125  | 0.000192 | 0.00112  | -0.06608 |
| HIF1AN   | -0.5287  | 5.658809 | -3.80115 | 0.000192 | 0.00112  | -0.15465 |
| FLJ39653 | -0.89317 | 1.959823 | -3.79946 | 0.000193 | 0.001126 | 0.269605 |
| QSOX2    | 0.823402 | 5.045762 | 3.799331 | 0.000193 | 0.001126 | -0.00397 |
| BCL2     | -1.13839 | 3.092882 | -3.79897 | 0.000193 | 0.001127 | 0.02687  |
| SPG20    | -1.58074 | 4.453383 | -3.79851 | 0.000194 | 0.001129 | -0.14957 |
| OBFC2B   | 0.677556 | 5.029658 | 3.797753 | 0.000194 | 0.001131 | -0.02624 |
| NDUFV3   | -0.56076 | 4.463582 | -3.79789 | 0.000194 | 0.001131 | -0.08749 |
| TMX4     | -0.82783 | 5.08484  | -3.79774 | 0.000194 | 0.001131 | -0.15349 |
| PTMA     | 0.607603 | 9.419343 | 3.797525 | 0.000194 | 0.001131 | -0.12723 |
| RGS5     | -1.8403  | 6.908428 | -3.79718 | 0.000195 | 0.001132 | -0.13835 |
| CGRRF1   | -0.59666 | 2.47974  | -3.7959  | 0.000196 | 0.001137 | 0.213108 |
| MAT2A    | -0.69277 | 7.495666 | -3.79538 | 0.000196 | 0.001139 | -0.15862 |
| SGMS2    | -1.1903  | 5.563702 | -3.79496 | 0.000196 | 0.00114  | -0.18363 |
| TP53INP1 | -0.99624 | 5.194365 | -3.79453 | 0.000197 | 0.001142 | -0.17522 |
| PRLR     | -1.98849 | 2.432688 | -3.7944  | 0.000197 | 0.001142 | 0.011647 |
| APPL1    | -0.60478 | 6.144897 | -3.79417 | 0.000197 | 0.001142 | -0.18815 |
| EPN1     | -0.69952 | 7.767226 | -3.79272 | 0.000198 | 0.001148 | -0.1597  |
| HADHA    | -0.49294 | 7.466939 | -3.79264 | 0.000198 | 0.001148 | -0.17393 |
| USP39    | 0.520735 | 5.796737 | 3.792015 | 0.000199 | 0.00115  | -0.14187 |
| MYLK     | -1.866   | 6.706762 | -3.79187 | 0.000199 | 0.00115  | -0.16258 |
| RGL3     | -2.39225 | 0.387082 | -3.79165 | 0.000199 | 0.00115  | 0.289076 |
| LYN      | 1.310673 | 5.813827 | 3.791507 | 0.000199 | 0.00115  | -0.07293 |
| GHITM    | -0.5622  | 7.487556 | -3.79162 | 0.000199 | 0.00115  | -0.17536 |
| TFG      | 0.622339 | 7.407398 | 3.791124 | 0.000199 | 0.001151 | -0.19822 |
| ZP3      | 1.738594 | 2.582689 | 3.789926 | 0.0002   | 0.001156 | 0.436917 |
| CCDC25   | -0.66508 | 5.210457 | -3.78998 | 0.0002   | 0.001156 | -0.18026 |
| AVPR1A   | -1.37366 | 0.135831 | -3.78946 | 0.0002   | 0.001157 | 0.405364 |
| TMEM185B | 0.742901 | 5.392265 | 3.789315 | 0.000201 | 0.001157 | -0.09285 |
| WDR76    | 1.215205 | 3.470442 | 3.787146 | 0.000202 | 0.001166 | 0.27899  |
| SP3      | 0.484326 | 6.867921 | 3.787255 | 0.000202 | 0.001166 | -0.21057 |
| PSMD1    | 0.468646 | 7.39725  | 3.786353 | 0.000203 | 0.001169 | -0.21386 |
| ZNF280D  | -0.50588 | 4.918386 | -3.7862  | 0.000203 | 0.001169 | -0.16529 |
| B3GNT1   | -0.80092 | 3.874867 | -3.78608 | 0.000203 | 0.001169 | -0.08553 |
| USP20    | -0.51246 | 4.842278 | -3.78515 | 0.000204 | 0.001173 | -0.1633  |
| AMZ2P1   | -0.722   | 2.077348 | -3.78465 | 0.000204 | 0.001174 | 0.222522 |
| LSM4     | 0.784452 | 6.087537 | 3.783119 | 0.000205 | 0.001181 | -0.17687 |
| PSMB1    | 0.57397  | 6.959233 | 3.781786 | 0.000206 | 0.001186 | -0.22987 |
| DDX56    | 0.608887 | 6.069573 | 3.78087  | 0.000207 | 0.00119  | -0.19567 |
| PCGF5    | -0.70778 | 6.367221 | -3.78055 | 0.000207 | 0.001191 | -0.2338  |
| DENR     | 0.526963 | 6.204467 | 3.779682 | 0.000208 | 0.001194 | -0.21325 |
| LOXL2    | 1.656547 | 5.817225 | 3.77912  | 0.000208 | 0.001196 | -0.07462 |
| EXOSC2   | 0.643292 | 4.635376 | 3.778962 | 0.000208 | 0.001196 | -0.03674 |

|          |          |          |          |          |          |          |
|----------|----------|----------|----------|----------|----------|----------|
| ZNF323   | -1.08755 | 3.198179 | -3.7778  | 0.000209 | 0.001201 | -0.05601 |
| SLC4A11  | 2.861535 | 4.253949 | 3.777338 | 0.00021  | 0.001202 | 0.33213  |
| LCLAT1   | 0.638421 | 5.320727 | 3.777398 | 0.00021  | 0.001202 | -0.1369  |
| TRIM29   | 4.094878 | 7.762167 | 3.775802 | 0.000211 | 0.001209 | -0.03288 |
| ATP10A   | -1.26812 | 2.420709 | -3.7755  | 0.000211 | 0.001209 | 0.04584  |
| SNX19    | -0.82233 | 6.484458 | -3.77501 | 0.000212 | 0.001211 | -0.24997 |
| FAM102A  | -1.02906 | 7.304526 | -3.77428 | 0.000212 | 0.001214 | -0.22959 |
| STAC3    | 1.467978 | 0.141768 | 3.772687 | 0.000213 | 0.001221 | 0.468094 |
| TAPBP    | 0.664967 | 8.640064 | 3.771037 | 0.000215 | 0.001228 | -0.24597 |
| HMGXB4   | 0.54363  | 5.311133 | 3.769849 | 0.000216 | 0.001233 | -0.17194 |
| MAP4K3   | -0.6331  | 5.571881 | -3.76952 | 0.000216 | 0.001234 | -0.26606 |
| XPOT     | 0.79491  | 6.836536 | 3.768697 | 0.000217 | 0.001236 | -0.26831 |
| AHCYL2   | -1.39909 | 5.559541 | -3.76878 | 0.000217 | 0.001236 | -0.27493 |
| SCARB1   | 1.297124 | 5.615634 | 3.768501 | 0.000217 | 0.001237 | -0.13048 |
| DUSP11   | 0.627274 | 4.796588 | 3.768072 | 0.000217 | 0.001238 | -0.10437 |
| CPE      | -1.71439 | 4.456915 | -3.76733 | 0.000218 | 0.001241 | -0.26377 |
| KCTD18   | -0.5056  | 4.118982 | -3.76708 | 0.000218 | 0.001242 | -0.15222 |
| TRIM11   | 0.534892 | 5.137245 | 3.766265 | 0.000219 | 0.001245 | -0.16572 |
| ELK1     | 0.617016 | 5.336087 | 3.765534 | 0.000219 | 0.001248 | -0.1826  |
| C11orf84 | 1.011809 | 4.260724 | 3.762372 | 0.000222 | 0.001262 | 0.034837 |
| XPO5     | 0.859152 | 6.685181 | 3.76244  | 0.000222 | 0.001262 | -0.28225 |
| FAM73B   | -0.65116 | 4.750649 | -3.76212 | 0.000222 | 0.001263 | -0.24629 |
| ZNF24    | -0.65284 | 6.248413 | -3.76151 | 0.000223 | 0.001265 | -0.30243 |
| GSS      | 0.656331 | 5.709769 | 3.760961 | 0.000223 | 0.001267 | -0.23248 |
| SGIP1    | -1.22089 | 1.624164 | -3.75985 | 0.000224 | 0.001272 | 0.138466 |
| TTC18    | -1.43732 | 0.352492 | -3.7593  | 0.000224 | 0.001274 | 0.275646 |
| GOS2     | -1.50976 | 2.235852 | -3.75921 | 0.000224 | 0.001274 | -0.00975 |
| TUBGCP6  | -0.58825 | 5.651181 | -3.75703 | 0.000226 | 0.001284 | -0.31117 |
| KRT17    | 5.958209 | 8.619494 | 3.756772 | 0.000226 | 0.001284 | 0.06443  |
| LARP6    | -1.28835 | 2.754027 | -3.75622 | 0.000227 | 0.001286 | -0.08515 |
| KIAA0913 | -0.60433 | 6.436178 | -3.7554  | 0.000228 | 0.00129  | -0.32248 |
| PPP2R5A  | -0.67003 | 6.476834 | -3.75448 | 0.000228 | 0.001294 | -0.32432 |
| TIMP3    | -1.78535 | 7.260133 | -3.75324 | 0.000229 | 0.001299 | -0.28327 |
| PER3     | -1.46019 | 5.127352 | -3.75326 | 0.000229 | 0.001299 | -0.3269  |
| IRAK4    | -0.54181 | 4.525918 | -3.75206 | 0.000231 | 0.001304 | -0.25235 |
| ABCA5    | -0.97961 | 4.444722 | -3.75128 | 0.000231 | 0.001307 | -0.28209 |
| CTBS     | -0.64051 | 5.04484  | -3.75046 | 0.000232 | 0.001311 | -0.30811 |
| PRKD2    | 0.504898 | 6.24009  | 3.74977  | 0.000232 | 0.001313 | -0.32105 |
| CASKIN2  | -0.67939 | 5.756317 | -3.74817 | 0.000234 | 0.001321 | -0.34629 |
| RUNX1    | 0.892132 | 6.980981 | 3.747085 | 0.000235 | 0.001326 | -0.34535 |
| TOP1MT   | 1.20545  | 5.049069 | 3.746451 | 0.000235 | 0.001328 | -0.13303 |
| ATRX     | -0.64262 | 7.476734 | -3.74586 | 0.000236 | 0.001331 | -0.33424 |
| CCNDBP1  | -0.61376 | 5.048645 | -3.74563 | 0.000236 | 0.001331 | -0.32365 |
| LHPP     | -0.76396 | 4.14046  | -3.74478 | 0.000237 | 0.001335 | -0.25765 |
| BCAS1    | -2.6689  | 2.673868 | -3.74416 | 0.000237 | 0.001337 | -0.2553  |
| CCT2     | 0.866458 | 7.053826 | 3.743986 | 0.000238 | 0.001338 | -0.35877 |
| NSUN2    | 0.653059 | 6.437692 | 3.743459 | 0.000238 | 0.00134  | -0.34618 |
| ARHGAP39 | 1.186549 | 4.367183 | 3.742976 | 0.000238 | 0.001341 | -0.0231  |
| LOC25845 | -1.52515 | 5.050019 | -3.74298 | 0.000238 | 0.001341 | -0.36204 |
| CDC14C   | -1.05017 | 0.114813 | -3.74216 | 0.000239 | 0.001344 | 0.273104 |
| CCT6B    | -1.19892 | 0.076633 | -3.74217 | 0.000239 | 0.001344 | 0.263738 |
| SMG7     | 0.454956 | 7.361132 | 3.742066 | 0.000239 | 0.001344 | -0.3694  |
| USP19    | -0.53042 | 5.851602 | -3.74194 | 0.000239 | 0.001344 | -0.36762 |
| TBCE     | 0.699598 | 4.037409 | 3.740248 | 0.000241 | 0.001352 | -0.05203 |
| MID2     | -1.22761 | 4.341694 | -3.74008 | 0.000241 | 0.001352 | -0.33025 |
| SETD7    | -0.70313 | 6.845359 | -3.73945 | 0.000242 | 0.001355 | -0.37001 |
| PAQR5    | -1.49708 | 3.448455 | -3.73894 | 0.000242 | 0.001357 | -0.26491 |
| ZNF654   | -0.62127 | 4.224526 | -3.73877 | 0.000242 | 0.001357 | -0.27452 |

|           |          |          |          |          |          |          |
|-----------|----------|----------|----------|----------|----------|----------|
| MRPL35    | -0.47234 | 5.221675 | -3.73885 | 0.000242 | 0.001357 | -0.35077 |
| ZFP112    | -0.86154 | 2.3207   | -3.73854 | 0.000242 | 0.001357 | 0.001683 |
| DET1      | -0.82014 | 2.063185 | -3.73742 | 0.000243 | 0.001362 | 0.048922 |
| BTNL9     | -1.65013 | 1.901746 | -3.73741 | 0.000243 | 0.001362 | -0.04851 |
| STXBP6    | -2.04482 | 0.790055 | -3.73692 | 0.000244 | 0.001364 | 0.077842 |
| TMEM80    | -0.74413 | 3.345531 | -3.73602 | 0.000245 | 0.001368 | -0.17531 |
| ZNF573    | -1.16018 | 1.004386 | -3.73524 | 0.000245 | 0.00137  | 0.14566  |
| ICA1L     | -1.05815 | 2.176376 | -3.73525 | 0.000245 | 0.00137  | -0.01697 |
| GAPDH     | 0.945266 | 11.22166 | 3.735318 | 0.000245 | 0.00137  | -0.29817 |
| ACTR8     | -0.5197  | 4.013761 | -3.73464 | 0.000246 | 0.001372 | -0.25349 |
| PAM       | -0.89708 | 6.788929 | -3.73461 | 0.000246 | 0.001372 | -0.38445 |
| HIST1H2BK | 1.620317 | 5.802843 | 3.732736 | 0.000248 | 0.001381 | -0.24066 |
| PCDHGB7   | -1.25801 | 2.311838 | -3.73262 | 0.000248 | 0.001381 | -0.08227 |
| HSP90AB1  | 0.693923 | 10.55484 | 3.731963 | 0.000248 | 0.001384 | -0.32376 |
| ARSG      | -1.003   | 1.462394 | -3.73153 | 0.000249 | 0.001386 | 0.0917   |
| MCFD2     | -0.48019 | 6.836857 | -3.73019 | 0.00025  | 0.001392 | -0.40616 |
| CLCN2     | 1.332698 | 3.662474 | 3.729929 | 0.00025  | 0.001393 | 0.071787 |
| ANKRD13D  | 0.778278 | 5.107464 | 3.729317 | 0.000251 | 0.001395 | -0.26438 |
| PLEKHA3   | -0.51676 | 4.325343 | -3.72939 | 0.000251 | 0.001395 | -0.30824 |
| GORASP1   | -0.60289 | 5.176009 | -3.7292  | 0.000251 | 0.001395 | -0.38821 |
| AHCYL1    | -0.51417 | 7.189734 | -3.72903 | 0.000251 | 0.001395 | -0.40275 |
| LRRC8D    | 0.816199 | 5.50503  | 3.728329 | 0.000252 | 0.001399 | -0.31069 |
| DERL1     | 0.562191 | 6.619596 | 3.72768  | 0.000252 | 0.001401 | -0.41174 |
| NCBP2     | 0.698775 | 6.21101  | 3.727532 | 0.000252 | 0.001402 | -0.38615 |
| FBLN1     | -2.17051 | 6.363285 | -3.72711 | 0.000253 | 0.001403 | -0.39054 |
| IFNGR2    | 0.687734 | 6.084123 | 3.726564 | 0.000253 | 0.001405 | -0.38131 |
| CCNK      | 0.502078 | 6.239853 | 3.726331 | 0.000254 | 0.001406 | -0.40287 |
| KLF16     | 0.664392 | 5.733057 | 3.726179 | 0.000254 | 0.001406 | -0.35539 |
| SLC12A9   | 0.820092 | 5.666601 | 3.724965 | 0.000255 | 0.001412 | -0.33892 |
| ANO7      | -1.538   | 0.927489 | -3.72414 | 0.000256 | 0.001416 | 0.082795 |
| VWA5A     | -1.21973 | 4.179149 | -3.72336 | 0.000256 | 0.001419 | -0.3732  |
| ITSN2     | -0.66647 | 6.448705 | -3.72315 | 0.000257 | 0.00142  | -0.43394 |
| GBA2      | -0.85102 | 5.495624 | -3.72289 | 0.000257 | 0.001421 | -0.43156 |
| GNG11     | -0.92721 | 3.242373 | -3.72194 | 0.000258 | 0.001425 | -0.23498 |
| USP12     | -0.74387 | 4.312105 | -3.72127 | 0.000258 | 0.001428 | -0.35594 |
| TET3      | 0.840916 | 6.550798 | 3.721272 | 0.000258 | 0.001428 | -0.42018 |
| RBP7      | -1.40684 | 0.551708 | -3.72103 | 0.000259 | 0.001428 | 0.123409 |
| DCHS2     | -2.02448 | 0.420168 | -3.72047 | 0.000259 | 0.001431 | 0.077229 |
| DCAF10    | -0.5387  | 5.830472 | -3.71862 | 0.000261 | 0.00144  | -0.44844 |
| CHST3     | -1.55848 | 5.333327 | -3.7182  | 0.000261 | 0.001442 | -0.45078 |
| SNX9      | -0.7805  | 6.410271 | -3.71793 | 0.000262 | 0.001443 | -0.45104 |
| NRXN3     | -1.88628 | 1.103323 | -3.71488 | 0.000265 | 0.001458 | -0.03196 |
| WTIP      | -1.02539 | 2.353256 | -3.71414 | 0.000265 | 0.001462 | -0.11504 |
| C19orf51  | 2.06467  | 0.139198 | 3.712222 | 0.000267 | 0.001472 | 0.268081 |
| SLC25A3   | -0.50485 | 8.375334 | -3.7117  | 0.000268 | 0.001474 | -0.42903 |
| PRMT2     | -0.61602 | 5.518614 | -3.71112 | 0.000268 | 0.001476 | -0.46751 |
| NAGS      | 1.943587 | 1.70925  | 3.710402 | 0.000269 | 0.00148  | 0.239604 |
| FBXO22OS  | 0.989706 | 1.019393 | 3.710303 | 0.000269 | 0.00148  | 0.230829 |
| TMPRSS4   | 2.611969 | 6.423805 | 3.709819 | 0.00027  | 0.001482 | -0.26842 |
| SUV39H2   | 0.812208 | 3.897955 | 3.708846 | 0.000271 | 0.001486 | -0.11646 |
| CCDC80    | -1.88773 | 5.235467 | -3.70849 | 0.000271 | 0.001488 | -0.48163 |
| CNKSR3    | -0.86061 | 4.536945 | -3.70824 | 0.000271 | 0.001489 | -0.43125 |
| HoxA9     | 3.364913 | 1.358591 | 3.707449 | 0.000272 | 0.001492 | 0.25058  |
| DCHS1     | -1.26309 | 5.029538 | -3.70704 | 0.000272 | 0.001494 | -0.48228 |
| GEFT      | -1.34631 | 2.520762 | -3.70535 | 0.000274 | 0.001502 | -0.23182 |
| ITSN1     | -0.6515  | 5.101961 | -3.70531 | 0.000274 | 0.001502 | -0.46932 |
| TPPP      | -1.5661  | 4.663939 | -3.70502 | 0.000274 | 0.001503 | -0.48401 |
| WDR31     | -1.03979 | 1.342486 | -3.70428 | 0.000275 | 0.001507 | 0.011616 |



|           |          |          |          |          |          |          |
|-----------|----------|----------|----------|----------|----------|----------|
| AZGP1     | -2.69365 | 1.868212 | -3.70361 | 0.000276 | 0.00151  | -0.30085 |
| ACVR2A    | -0.68865 | 4.104279 | -3.70336 | 0.000276 | 0.001511 | -0.39029 |
| NKRF      | 0.694881 | 4.513605 | 3.701661 | 0.000278 | 0.00152  | -0.27522 |
| FAM107B   | -1.60099 | 5.737085 | -3.70013 | 0.000279 | 0.001528 | -0.50959 |
| C9orf152  | -2.59106 | 2.002066 | -3.69968 | 0.00028  | 0.00153  | -0.32288 |
| KBTBD4    | -0.5075  | 3.665512 | -3.6994  | 0.00028  | 0.001531 | -0.32287 |
| ZC3H8     | 0.746106 | 2.995061 | 3.697597 | 0.000282 | 0.00154  | -0.02091 |
| LSM2      | 0.697359 | 4.682641 | 3.697156 | 0.000282 | 0.001542 | -0.32008 |
| SFXN1     | 0.768799 | 5.672837 | 3.69718  | 0.000282 | 0.001542 | -0.44061 |
| SAMD11    | -1.60547 | 0.408587 | -3.69687 | 0.000283 | 0.001543 | 0.03833  |
| SOX21     | -2.52243 | 1.59876  | -3.6966  | 0.000283 | 0.001544 | -0.26491 |
| GORAB     | 0.703148 | 3.495344 | 3.696359 | 0.000283 | 0.001544 | -0.10585 |
| RALGPS1   | -1.33415 | 4.152188 | -3.69645 | 0.000283 | 0.001544 | -0.47162 |
| ALG6      | 0.615821 | 4.094372 | 3.694012 | 0.000286 | 0.001556 | -0.23574 |
| LIPA      | 0.710181 | 6.346462 | 3.692421 | 0.000287 | 0.001565 | -0.51543 |
| FBXL6     | 1.079538 | 4.852866 | 3.691836 | 0.000288 | 0.001568 | -0.30479 |
| R3HDM1    | 0.582143 | 5.656173 | 3.691416 | 0.000288 | 0.00157  | -0.47524 |
| FANCL     | 0.908955 | 3.703545 | 3.69095  | 0.000289 | 0.001572 | -0.12765 |
| TNNT1     | 4.556696 | 0.812917 | 3.690024 | 0.00029  | 0.001576 | 0.194125 |
| CPOX      | 0.730676 | 4.903149 | 3.689812 | 0.00029  | 0.001577 | -0.37732 |
| PHF10     | -0.62811 | 5.907306 | -3.68922 | 0.000291 | 0.00158  | -0.55263 |
| FOXD2     | 2.225913 | 1.815105 | 3.688979 | 0.000291 | 0.001581 | 0.177664 |
| CHD2      | -0.45226 | 6.980506 | -3.68777 | 0.000292 | 0.001587 | -0.55083 |
| CTSE      | -3.86924 | 2.309609 | -3.68589 | 0.000294 | 0.001597 | -0.48974 |
| SH3BGRL2  | -2.33491 | 5.492092 | -3.68541 | 0.000295 | 0.0016   | -0.55101 |
| HMOX2     | -0.79919 | 5.341539 | -3.68502 | 0.000295 | 0.001601 | -0.5564  |
| RIBC2     | 2.384565 | -0.14114 | 3.684726 | 0.000296 | 0.001602 | 0.178508 |
| CARM1     | 0.584918 | 6.737858 | 3.683078 | 0.000297 | 0.001612 | -0.56882 |
| SLC3A2    | 0.987069 | 7.471649 | 3.681368 | 0.000299 | 0.001621 | -0.58015 |
| TMEM86B   | -0.93633 | 2.463753 | -3.67779 | 0.000303 | 0.001642 | -0.24108 |
| LEPRE1    | 0.961725 | 5.210967 | 3.677396 | 0.000304 | 0.001644 | -0.43364 |
| IER5L     | 1.124096 | 4.827671 | 3.676626 | 0.000305 | 0.001648 | -0.34762 |
| NAALADL2  | -1.51844 | 2.189427 | -3.67511 | 0.000306 | 0.001656 | -0.29268 |
| RQCD1     | 0.632307 | 3.916485 | 3.674623 | 0.000307 | 0.001658 | -0.26668 |
| TMEM177   | 0.926489 | 3.216873 | 3.673892 | 0.000308 | 0.001662 | -0.10805 |
| DDX49     | 0.611018 | 5.151378 | 3.673974 | 0.000308 | 0.001662 | -0.47962 |
| HNRNPD    | 0.465787 | 7.59624  | 3.673284 | 0.000308 | 0.001665 | -0.60415 |
| DPY30     | 0.650873 | 4.874524 | 3.673134 | 0.000309 | 0.001665 | -0.44066 |
| C1orf123  | -0.52562 | 4.20296  | -3.67154 | 0.00031  | 0.001673 | -0.49495 |
| MTHFD2    | 0.721826 | 6.356581 | 3.671616 | 0.00031  | 0.001673 | -0.58686 |
| GTF2F2    | 0.715005 | 4.643888 | 3.671126 | 0.000311 | 0.001674 | -0.40026 |
| SUMO1     | 0.496762 | 5.892566 | 3.671061 | 0.000311 | 0.001674 | -0.5716  |
| VTA1      | 0.573316 | 6.030571 | 3.671096 | 0.000311 | 0.001674 | -0.57651 |
| RRP9      | 0.882515 | 3.915176 | 3.670813 | 0.000311 | 0.001675 | -0.23799 |
| HOXC5     | -1.033   | 0.431781 | -3.67063 | 0.000311 | 0.001676 | 0.003796 |
| AATK      | -1.48265 | 2.896456 | -3.6694  | 0.000313 | 0.001683 | -0.4323  |
| DDX31     | 0.619833 | 3.990006 | 3.669125 | 0.000313 | 0.001684 | -0.3009  |
| RAPGEF4   | -1.07032 | 2.633121 | -3.66894 | 0.000313 | 0.001684 | -0.32333 |
| DPH2      | 0.666966 | 4.928967 | 3.667714 | 0.000315 | 0.00169  | -0.46504 |
| GTPBP4    | 0.704042 | 6.070781 | 3.667811 | 0.000315 | 0.00169  | -0.5819  |
| JMY       | -0.93917 | 5.211094 | -3.66759 | 0.000315 | 0.001691 | -0.61586 |
| TARDBP    | 0.314028 | 7.242127 | 3.666582 | 0.000316 | 0.001696 | -0.63037 |
| LOC284900 | -0.6112  | 2.472603 | -3.66635 | 0.000316 | 0.001697 | -0.23404 |
| PDE4DIP   | -0.83327 | 5.933642 | -3.66619 | 0.000316 | 0.001697 | -0.63284 |
| RGL2      | -0.60302 | 5.707598 | -3.66592 | 0.000317 | 0.001698 | -0.62845 |
| HOXB9     | 4.805486 | 1.762059 | 3.665381 | 0.000317 | 0.001701 | 0.112533 |
| ESPN      | 3.291646 | 4.528635 | 3.66495  | 0.000318 | 0.001703 | -0.03793 |
| NFATC4    | -1.02904 | 3.536502 | -3.66457 | 0.000318 | 0.001704 | -0.49024 |

|          |          |          |          |          |          |          |
|----------|----------|----------|----------|----------|----------|----------|
| SERTAD1  | -0.84713 | 3.961451 | -3.66458 | 0.000318 | 0.001704 | -0.5222  |
| GRASP    | -0.91018 | 2.338383 | -3.66382 | 0.000319 | 0.001707 | -0.2667  |
| GOLGA3   | -0.51732 | 7.043911 | -3.66387 | 0.000319 | 0.001707 | -0.63054 |
| WDR19    | -0.66536 | 3.692331 | -3.66324 | 0.00032  | 0.001708 | -0.47279 |
| LOC92249 | -1.08104 | 4.667046 | -3.66336 | 0.00032  | 0.001708 | -0.60916 |
| KCNQ1    | -2.06925 | 4.20796  | -3.66341 | 0.00032  | 0.001708 | -0.62215 |
| TUBB2C   | 0.776777 | 8.613025 | 3.66329  | 0.00032  | 0.001708 | -0.62282 |
| POP1     | 0.989013 | 3.647743 | 3.662583 | 0.000321 | 0.001712 | -0.20373 |
| ASMTL    | -0.73726 | 3.571559 | -3.66234 | 0.000321 | 0.001713 | -0.46587 |
| POC5     | 0.662945 | 3.183342 | 3.661546 | 0.000322 | 0.001717 | -0.18003 |
| MTCH2    | 0.582238 | 6.155543 | 3.661043 | 0.000322 | 0.00172  | -0.61891 |
| UBE2L6   | 1.191551 | 6.048649 | 3.660789 | 0.000323 | 0.001721 | -0.56382 |
| NFE2L3   | 1.775588 | 5.543809 | 3.659805 | 0.000324 | 0.001726 | -0.41982 |
| ARSD     | -1.21433 | 5.531757 | -3.65978 | 0.000324 | 0.001726 | -0.6534  |
| EIF5AL1  | 0.740551 | 6.181208 | 3.659332 | 0.000324 | 0.001728 | -0.61671 |
| C4orf52  | -0.65627 | 3.562026 | -3.6585  | 0.000325 | 0.001732 | -0.46582 |
| REEP2    | -1.60151 | 0.537903 | -3.65762 | 0.000327 | 0.001737 | -0.10938 |
| MAP3K5   | -0.79465 | 5.384696 | -3.65733 | 0.000327 | 0.001738 | -0.65286 |
| ZBTB8A   | -0.58185 | 3.94064  | -3.657   | 0.000327 | 0.00174  | -0.51846 |
| TGFB3    | -1.17281 | 3.40246  | -3.65517 | 0.000329 | 0.001751 | -0.51886 |
| ZNF709   | -1.08694 | 1.336917 | -3.65465 | 0.00033  | 0.001752 | -0.16191 |
| ADCY4    | -1.04068 | 2.475666 | -3.65472 | 0.00033  | 0.001752 | -0.34129 |
| BAK1     | 0.90284  | 5.144443 | 3.654639 | 0.00033  | 0.001752 | -0.50896 |
| EVPL     | 2.008606 | 7.315403 | 3.654353 | 0.00033  | 0.001753 | -0.62908 |
| CDC42BPA | -1.04115 | 6.667398 | -3.65443 | 0.00033  | 0.001753 | -0.66071 |
| BCL2L11  | 0.702953 | 5.282296 | 3.653824 | 0.000331 | 0.001755 | -0.55357 |
| CAPS2    | -1.19835 | 0.224151 | -3.65326 | 0.000332 | 0.001758 | -0.04825 |
| TFR2     | -1.71192 | 1.686102 | -3.65333 | 0.000332 | 0.001758 | -0.30189 |
| CTNS     | -0.57807 | 4.123361 | -3.65225 | 0.000333 | 0.001764 | -0.55598 |
| S100A10  | 1.193251 | 8.788625 | 3.651229 | 0.000334 | 0.001769 | -0.66844 |
| COX7C    | -0.68049 | 6.131492 | -3.65086 | 0.000335 | 0.001771 | -0.68553 |
| PRKAR2A  | -0.7438  | 4.601637 | -3.65033 | 0.000335 | 0.001774 | -0.62661 |
| SAT2     | -0.66432 | 3.930941 | -3.64968 | 0.000336 | 0.001777 | -0.55075 |
| MLXIP    | -0.69709 | 6.797586 | -3.64952 | 0.000336 | 0.001778 | -0.68121 |
| SFRS3    | 0.364796 | 7.652893 | 3.648654 | 0.000337 | 0.001783 | -0.6859  |
| PBX3     | -0.85633 | 4.257306 | -3.64849 | 0.000338 | 0.001783 | -0.61024 |
| CTLA4    | 2.135829 | 1.018397 | 3.648148 | 0.000338 | 0.001785 | 0.057791 |
| NUP160   | 0.537366 | 6.311217 | 3.647606 | 0.000339 | 0.001788 | -0.67588 |
| CCDC109B | 1.206304 | 3.655283 | 3.645477 | 0.000341 | 0.001801 | -0.23251 |
| KLF5     | 1.299955 | 8.552125 | 3.645217 | 0.000342 | 0.001802 | -0.69566 |
| DENND4C  | -0.72413 | 6.185293 | -3.64457 | 0.000342 | 0.001805 | -0.70651 |
| GADD45A  | -0.82364 | 4.757668 | -3.64264 | 0.000345 | 0.001817 | -0.67109 |
| LSM5     | 0.668881 | 5.058871 | 3.64196  | 0.000346 | 0.001821 | -0.57028 |
| DCN      | -1.67769 | 7.313772 | -3.64154 | 0.000346 | 0.001823 | -0.66995 |
| SARM1    | -1.14884 | 3.860574 | -3.64086 | 0.000347 | 0.001827 | -0.61996 |
| CARD9    | 1.989563 | 0.650898 | 3.640297 | 0.000348 | 0.00183  | 0.032986 |
| RDH5     | -1.33638 | 0.830712 | -3.63975 | 0.000348 | 0.001833 | -0.17343 |
| RG9MTD3  | -0.59619 | 2.704291 | -3.63734 | 0.000352 | 0.001849 | -0.37078 |
| RTKN2    | 2.167126 | 3.372288 | 3.636017 | 0.000353 | 0.001857 | -0.12034 |
| LONRF1   | -0.86506 | 4.312316 | -3.63556 | 0.000354 | 0.001859 | -0.66046 |
| TNS4     | 4.860172 | 7.1528   | 3.635167 | 0.000354 | 0.001861 | -0.27955 |
| TTC7B    | -1.12029 | 3.987539 | -3.63448 | 0.000355 | 0.001865 | -0.65285 |
| SHOX2    | 2.615811 | 0.264746 | 3.632916 | 0.000357 | 0.001874 | 0.009755 |
| SCAMP3   | 0.577645 | 6.19217  | 3.632944 | 0.000357 | 0.001874 | -0.71708 |
| PLOD1    | 0.843447 | 7.081074 | 3.633051 | 0.000357 | 0.001874 | -0.74192 |
| LYRM5    | -1.04838 | 3.664922 | -3.63189 | 0.000359 | 0.00188  | -0.61762 |
| REXO4    | 0.622807 | 4.441305 | 3.630902 | 0.00036  | 0.001886 | -0.51491 |
| MEN1     | 0.598342 | 5.725493 | 3.630276 | 0.000361 | 0.00189  | -0.6889  |

|          |          |          |          |          |          |          |
|----------|----------|----------|----------|----------|----------|----------|
| SEC63    | -0.50566 | 6.479843 | -3.63012 | 0.000361 | 0.00189  | -0.75507 |
| SP140L   | 1.134537 | 4.516598 | 3.62961  | 0.000362 | 0.001892 | -0.44479 |
| ARHGEF10 | -1.15817 | 4.397709 | -3.62955 | 0.000362 | 0.001892 | -0.70943 |
| COL5A2   | 1.587801 | 7.453084 | 3.62854  | 0.000363 | 0.001899 | -0.74664 |
| PLEKHM3  | -0.66663 | 4.389152 | -3.62643 | 0.000366 | 0.001913 | -0.68214 |
| PRICKLE4 | -1.2931  | 1.45016  | -3.62482 | 0.000368 | 0.001923 | -0.30212 |
| IKBIP    | 1.154695 | 3.890558 | 3.623318 | 0.00037  | 0.001933 | -0.35193 |
| PHC1     | -0.88839 | 4.118823 | -3.62292 | 0.00037  | 0.001935 | -0.68651 |
| SERGEF   | -0.55867 | 3.06083  | -3.6227  | 0.000371 | 0.001935 | -0.48146 |
| FAM53C   | -0.51821 | 5.40891  | -3.62264 | 0.000371 | 0.001935 | -0.76272 |
| C17orf49 | 0.728296 | 5.320702 | 3.621532 | 0.000372 | 0.001942 | -0.66507 |
| NPDC1    | -1.33777 | 5.016974 | -3.62142 | 0.000372 | 0.001943 | -0.77656 |
| PLEKHG5  | 1.177621 | 5.471599 | 3.621171 | 0.000373 | 0.001944 | -0.635   |
| LTBP3    | -1.07628 | 6.778021 | -3.62032 | 0.000374 | 0.001949 | -0.77371 |
| HPSE     | 1.717229 | 2.925375 | 3.619513 | 0.000375 | 0.001954 | -0.17104 |
| H1FX     | 0.896727 | 6.946708 | 3.61929  | 0.000375 | 0.001955 | -0.78389 |
| PCDH7    | -1.80953 | 5.295873 | -3.61895 | 0.000376 | 0.001956 | -0.7889  |
| PSME3    | 0.488191 | 7.588295 | 3.617825 | 0.000377 | 0.001964 | -0.79368 |
| AKTIP    | -0.62314 | 4.152934 | -3.61752 | 0.000378 | 0.001965 | -0.68305 |
| CBFA2T3  | -1.30819 | 2.116268 | -3.61729 | 0.000378 | 0.001966 | -0.44668 |
| ASCC3    | 0.621691 | 6.447423 | 3.61688  | 0.000379 | 0.001968 | -0.78303 |
| C12orf34 | -1.11754 | 3.024056 | -3.61544 | 0.000381 | 0.001978 | -0.58545 |
| ANGPT2   | 1.608002 | 3.85673  | 3.61516  | 0.000381 | 0.001979 | -0.30833 |
| ANKRD28  | -0.59982 | 5.93318  | -3.6134  | 0.000383 | 0.001991 | -0.81154 |
| SYT15    | -1.27026 | 1.232848 | -3.61231 | 0.000385 | 0.001998 | -0.31269 |
| ZYG11B   | -0.49552 | 5.665841 | -3.61182 | 0.000386 | 0.002001 | -0.80884 |
| PNO1     | 0.589691 | 4.823299 | 3.61159  | 0.000386 | 0.002001 | -0.65075 |
| CTGF     | -1.54919 | 6.739233 | -3.61164 | 0.000386 | 0.002001 | -0.79268 |
| CCT4     | 0.537034 | 7.690977 | 3.611493 | 0.000386 | 0.002001 | -0.81409 |
| DHX29    | -0.50047 | 5.407167 | -3.61124 | 0.000386 | 0.002002 | -0.80043 |
| ABAT     | -1.23542 | 3.58088  | -3.6105  | 0.000387 | 0.002007 | -0.69873 |
| SIGLEC12 | 2.363675 | -0.20068 | 3.610119 | 0.000388 | 0.002009 | -0.06265 |
| CC2D2A   | -1.02426 | 3.011213 | -3.60957 | 0.000389 | 0.002012 | -0.59458 |
| UMPS     | 0.740222 | 5.01425  | 3.606687 | 0.000393 | 0.002032 | -0.67496 |
| TMEM192  | -0.71697 | 3.9463   | -3.60621 | 0.000394 | 0.002034 | -0.7059  |
| FAM114A1 | -0.65417 | 5.000424 | -3.6062  | 0.000394 | 0.002034 | -0.80143 |
| MITD1    | 0.697311 | 3.113521 | 3.605773 | 0.000394 | 0.002037 | -0.35152 |
| DCXR     | -0.82388 | 5.245623 | -3.60558 | 0.000394 | 0.002037 | -0.82422 |
| SAC3D1   | 1.021055 | 3.594689 | 3.605127 | 0.000395 | 0.00204  | -0.38342 |
| PPT2     | -0.59989 | 4.266777 | -3.60483 | 0.000395 | 0.00204  | -0.7357  |
| SPNS1    | 0.530384 | 5.63814  | 3.604884 | 0.000395 | 0.00204  | -0.77275 |
| CASP2    | 0.708817 | 5.819803 | 3.604767 | 0.000396 | 0.00204  | -0.77472 |
| APOE     | 2.323078 | 6.104627 | 3.604485 | 0.000396 | 0.002042 | -0.61745 |
| MALAT1   | -1.16855 | 11.51751 | -3.60361 | 0.000397 | 0.002047 | -0.67704 |
| APOC1    | 3.324828 | 3.142025 | 3.603485 | 0.000397 | 0.002047 | -0.11998 |
| RABEPK   | 0.695905 | 4.06188  | 3.603289 | 0.000398 | 0.002048 | -0.52371 |
| IL32     | 2.108642 | 5.764313 | 3.602981 | 0.000398 | 0.00205  | -0.59923 |
| GIMAP8   | -1.07646 | 2.619531 | -3.60231 | 0.000399 | 0.002054 | -0.55269 |
| GATA4    | -2.80472 | 2.22113  | -3.60211 | 0.000399 | 0.002055 | -0.70346 |
| PMS2     | 0.558476 | 4.811205 | 3.600906 | 0.000401 | 0.002063 | -0.68883 |
| USO1     | -0.60209 | 6.719813 | -3.60005 | 0.000402 | 0.002068 | -0.85202 |
| AHNAK    | -1.16824 | 10.32738 | -3.59962 | 0.000403 | 0.002071 | -0.73035 |
| ANXA6    | -1.12316 | 5.385765 | -3.59884 | 0.000404 | 0.002076 | -0.8581  |
| PHACTR2  | -0.91297 | 5.771719 | -3.59838 | 0.000405 | 0.002079 | -0.86275 |
| VAT1L    | -1.53422 | 0.429183 | -3.59791 | 0.000405 | 0.002081 | -0.2859  |
| SCD5     | -1.2228  | 4.07516  | -3.59704 | 0.000407 | 0.002087 | -0.79606 |
| RAD9A    | 0.766608 | 3.83164  | 3.596445 | 0.000408 | 0.002091 | -0.49148 |
| PGM1     | -0.77767 | 5.784595 | -3.59569 | 0.000409 | 0.002096 | -0.8711  |

|           |          |          |          |          |          |          |
|-----------|----------|----------|----------|----------|----------|----------|
| KIAA1147  | -0.90942 | 5.879124 | -3.59548 | 0.000409 | 0.002097 | -0.87292 |
| HOXB13    | 4.32387  | 0.642093 | 3.593996 | 0.000411 | 0.002104 | -0.11597 |
| LSM11     | -0.57327 | 3.393834 | -3.59426 | 0.000411 | 0.002104 | -0.64309 |
| SNX24     | -0.724   | 3.316197 | -3.59422 | 0.000411 | 0.002104 | -0.6513  |
| PRICKLE3  | 0.84919  | 4.712202 | 3.594062 | 0.000411 | 0.002104 | -0.65175 |
| KLHL26    | -0.64899 | 3.577062 | -3.59388 | 0.000411 | 0.002104 | -0.68753 |
| C2CD2     | -0.74443 | 5.044344 | -3.5939  | 0.000411 | 0.002104 | -0.85063 |
| FBXO45    | 0.926649 | 5.43397  | 3.593257 | 0.000412 | 0.002108 | -0.75276 |
| ELAVL1    | 0.386727 | 6.4679   | 3.593231 | 0.000412 | 0.002108 | -0.87216 |
| TRIM36    | -1.5092  | 1.711607 | -3.59255 | 0.000413 | 0.002112 | -0.47996 |
| EDNRB     | -1.34532 | 3.133221 | -3.59208 | 0.000414 | 0.002115 | -0.71468 |
| KIF13B    | -1.48871 | 6.112716 | -3.59178 | 0.000415 | 0.002116 | -0.87525 |
| ADRB1     | -1.58919 | 0.390522 | -3.5915  | 0.000415 | 0.002118 | -0.309   |
| ENPP1     | -1.39623 | 2.766024 | -3.59059 | 0.000416 | 0.002124 | -0.66767 |
| FIG4      | -0.60167 | 3.797363 | -3.59045 | 0.000417 | 0.002124 | -0.72592 |
| TRAK1     | -0.8776  | 6.726988 | -3.59039 | 0.000417 | 0.002124 | -0.87968 |
| TREM2     | 2.78022  | 1.811889 | 3.589892 | 0.000417 | 0.002127 | -0.13069 |
| DDR1      | 0.839631 | 8.663108 | 3.589485 | 0.000418 | 0.002129 | -0.87332 |
| CCDC121   | -0.6422  | 1.611012 | -3.58873 | 0.000419 | 0.002133 | -0.36467 |
| PAMR1     | -1.20061 | 1.881369 | -3.58872 | 0.000419 | 0.002133 | -0.48054 |
| SERAC1    | -0.68953 | 3.848016 | -3.58892 | 0.000419 | 0.002133 | -0.74765 |
| LOC644538 | -1.29156 | 0.492503 | -3.58847 | 0.00042  | 0.002134 | -0.30245 |
| PALM      | -1.35308 | 3.157134 | -3.58818 | 0.00042  | 0.002134 | -0.73491 |
| ZADH2     | -0.63666 | 4.948461 | -3.58821 | 0.00042  | 0.002134 | -0.85743 |
| CLK1      | -0.69529 | 6.09145  | -3.58831 | 0.00042  | 0.002134 | -0.89753 |
| TSPYL5    | -1.59955 | 2.792857 | -3.58732 | 0.000421 | 0.002139 | -0.7126  |
| NOTCH1    | 0.978064 | 7.467613 | 3.586548 | 0.000422 | 0.002145 | -0.9026  |
| NSA2      | -0.55853 | 5.501187 | -3.58638 | 0.000423 | 0.002145 | -0.89048 |
| TBXA2R    | -0.95067 | 1.270205 | -3.5858  | 0.000424 | 0.002149 | -0.36671 |
| SSBP2     | -1.10955 | 3.094438 | -3.58555 | 0.000424 | 0.002149 | -0.70309 |
| ABCE1     | 0.565279 | 6.521094 | 3.585563 | 0.000424 | 0.002149 | -0.89396 |
| MRPL4     | 0.674794 | 5.942965 | 3.584874 | 0.000425 | 0.002154 | -0.8552  |
| NT5C3     | 1.064397 | 4.962153 | 3.584323 | 0.000426 | 0.002157 | -0.69098 |
| USP18     | 1.511213 | 3.634447 | 3.584095 | 0.000426 | 0.002158 | -0.3937  |
| RPN1      | 0.545782 | 8.382011 | 3.583861 | 0.000427 | 0.002159 | -0.89288 |
| DUSP9     | 3.59747  | 0.251038 | 3.583682 | 0.000427 | 0.00216  | -0.14811 |
| WDR18     | 0.783778 | 5.162165 | 3.5831   | 0.000428 | 0.002164 | -0.76896 |
| CARD14    | 2.459691 | 3.320064 | 3.582595 | 0.000428 | 0.002165 | -0.26429 |
| IKBKE     | 1.181307 | 4.37476  | 3.582577 | 0.000429 | 0.002165 | -0.56795 |
| FUT1      | -1.01974 | 3.36339  | -3.5827  | 0.000428 | 0.002165 | -0.73883 |
| CCL4L2    | 2.499453 | 0.909548 | 3.581422 | 0.00043  | 0.002173 | -0.15635 |
| DTX2      | 0.93417  | 5.773977 | 3.581429 | 0.00043  | 0.002173 | -0.82869 |
| CENPP     | 1.37517  | 2.489912 | 3.580858 | 0.000431 | 0.002176 | -0.28578 |
| ACTR3     | 0.555532 | 8.308721 | 3.579071 | 0.000434 | 0.00219  | -0.91102 |
| SYNC      | -1.44406 | 2.232562 | -3.57852 | 0.000435 | 0.002193 | -0.62273 |
| MTHFD1    | 0.648377 | 6.407371 | 3.578358 | 0.000435 | 0.002194 | -0.90975 |
| PRMT5     | 0.633352 | 6.027061 | 3.577299 | 0.000437 | 0.002201 | -0.89028 |
| COMMD10   | -0.52057 | 3.593532 | -3.57663 | 0.000438 | 0.002206 | -0.72833 |
| PIGW      | 0.828677 | 3.718875 | 3.57478  | 0.000441 | 0.00222  | -0.53444 |
| TIRAP     | -0.71776 | 3.316324 | -3.5743  | 0.000441 | 0.002221 | -0.7168  |
| SLC41A2   | -1.62092 | 3.201503 | -3.57445 | 0.000441 | 0.002221 | -0.80764 |
| SPON1     | -1.61732 | 4.288485 | -3.57438 | 0.000441 | 0.002221 | -0.91348 |
| SYDE2     | -1.2922  | 2.202141 | -3.57387 | 0.000442 | 0.002224 | -0.60407 |
| MIF       | 0.965287 | 8.214069 | 3.573733 | 0.000442 | 0.002224 | -0.93835 |
| RAC1      | 0.552002 | 8.568653 | 3.573201 | 0.000443 | 0.002227 | -0.9238  |
| ARPC3     | 0.585964 | 6.911265 | 3.573255 | 0.000443 | 0.002227 | -0.94535 |
| C7orf40   | 0.899463 | 3.993086 | 3.571905 | 0.000445 | 0.002235 | -0.5823  |
| HCP5      | 1.516166 | 5.734831 | 3.571957 | 0.000445 | 0.002235 | -0.79141 |

|          |          |          |          |          |          |          |
|----------|----------|----------|----------|----------|----------|----------|
| ZNF449   | -0.58788 | 3.096752 | -3.57166 | 0.000446 | 0.002236 | -0.66264 |
| PLAGL1   | -1.18335 | 4.003515 | -3.57089 | 0.000447 | 0.002242 | -0.87419 |
| TFAP2A   | 3.863987 | 5.208589 | 3.570494 | 0.000447 | 0.002244 | -0.36568 |
| ULK2     | -0.95872 | 4.293733 | -3.57047 | 0.000448 | 0.002244 | -0.88591 |
| PPA1     | 0.711983 | 6.957741 | 3.570343 | 0.000448 | 0.002244 | -0.95364 |
| TMEM59   | -0.6336  | 7.745134 | -3.57023 | 0.000448 | 0.002244 | -0.92699 |
| RGP1     | -0.66151 | 3.371365 | -3.56898 | 0.00045  | 0.002253 | -0.73538 |
| KIAA1328 | -0.68193 | 2.351261 | -3.56809 | 0.000451 | 0.00226  | -0.55346 |
| HABP4    | -0.83777 | 2.914157 | -3.56779 | 0.000452 | 0.00226  | -0.68438 |
| ACTR2    | 0.402495 | 8.209139 | 3.567872 | 0.000452 | 0.00226  | -0.9477  |
| FCGR1A   | 2.043206 | 0.774372 | 3.566155 | 0.000455 | 0.002272 | -0.20462 |
| NUDT16   | -0.81964 | 4.368032 | -3.56623 | 0.000454 | 0.002272 | -0.89528 |
| PFKFB4   | 1.822232 | 3.150775 | 3.565917 | 0.000455 | 0.002272 | -0.3618  |
| KLHL2    | -0.69251 | 4.360635 | -3.56593 | 0.000455 | 0.002272 | -0.88513 |
| EIF1B    | -0.57459 | 4.724189 | -3.56583 | 0.000455 | 0.002272 | -0.91015 |
| FAM120B  | -0.41425 | 4.944411 | -3.56319 | 0.000459 | 0.002293 | -0.92569 |
| CTDSP2   | -0.57067 | 7.990224 | -3.56249 | 0.000461 | 0.002297 | -0.94697 |
| EIF4A1   | 0.59507  | 8.548441 | 3.562576 | 0.00046  | 0.002297 | -0.96096 |
| HLA-B    | 1.246404 | 9.740244 | 3.561979 | 0.000461 | 0.002301 | -0.9442  |
| C6orf223 | 3.837918 | 0.954466 | 3.561406 | 0.000462 | 0.002304 | -0.22016 |
| OSCP1    | -0.78738 | 1.546624 | -3.56063 | 0.000464 | 0.002309 | -0.4664  |
| ADAM17   | 0.925124 | 5.48509  | 3.560723 | 0.000463 | 0.002309 | -0.86774 |
| ARL6IP5  | -0.69592 | 6.344858 | -3.56046 | 0.000464 | 0.00231  | -0.98907 |
| FAM83B   | 2.639953 | 5.010162 | 3.558919 | 0.000466 | 0.002322 | -0.5227  |
| OBFC2A   | 1.215305 | 4.205312 | 3.557801 | 0.000468 | 0.002329 | -0.61571 |
| RCHY1    | -0.56319 | 4.254921 | -3.55789 | 0.000468 | 0.002329 | -0.88832 |
| DNMBP    | -0.92539 | 6.084861 | -3.55776 | 0.000468 | 0.002329 | -0.99824 |
| C16orf5  | -1.14833 | 4.10585  | -3.55688 | 0.00047  | 0.002335 | -0.92817 |
| ATG2B    | -0.57351 | 5.855983 | -3.55634 | 0.000471 | 0.002339 | -1.00167 |
| MMP11    | 4.488257 | 5.947381 | 3.55582  | 0.000472 | 0.002343 | -0.42928 |
| KIAA0406 | 0.581889 | 5.493059 | 3.555664 | 0.000472 | 0.002343 | -0.91906 |
| MOV10    | 0.66479  | 6.052834 | 3.554591 | 0.000474 | 0.002351 | -0.96567 |
| NCAPD3   | 0.797835 | 5.664297 | 3.553347 | 0.000476 | 0.002361 | -0.92416 |
| DPM1     | 0.53676  | 5.343138 | 3.552167 | 0.000478 | 0.00237  | -0.91956 |
| TRIM39   | -0.46147 | 3.810766 | -3.55148 | 0.000479 | 0.002375 | -0.84053 |
| PDE5A    | -1.39477 | 4.74501  | -3.54981 | 0.000482 | 0.002388 | -1.00956 |
| MMP12    | 5.301835 | 4.083723 | 3.549539 | 0.000482 | 0.002389 | -0.26133 |
| HSP90B1  | 0.547177 | 9.633077 | 3.549515 | 0.000482 | 0.002389 | -0.96915 |
| C11orf80 | 1.309205 | 3.840649 | 3.549291 | 0.000483 | 0.00239  | -0.56655 |
| MICALL1  | -1.36496 | 6.814955 | -3.54846 | 0.000484 | 0.002396 | -1.00735 |
| RET      | -1.81854 | 0.362816 | -3.54768 | 0.000486 | 0.002402 | -0.47111 |
| SLC2A13  | -1.07399 | 3.834684 | -3.5471  | 0.000487 | 0.002406 | -0.9247  |
| PPM1A    | -0.55172 | 6.122577 | -3.54696 | 0.000487 | 0.002407 | -1.0359  |
| MED6     | 0.484025 | 4.186998 | 3.546653 | 0.000487 | 0.002408 | -0.77299 |
| BCAT2    | -0.64726 | 4.890447 | -3.54667 | 0.000487 | 0.002408 | -0.99268 |
| FAM176A  | 2.684685 | 0.845831 | 3.54496  | 0.00049  | 0.002419 | -0.2719  |
| TRMT1    | 0.699832 | 4.65625  | 3.545113 | 0.00049  | 0.002419 | -0.82932 |
| ALDH2    | -1.25421 | 7.052397 | -3.54491 | 0.00049  | 0.002419 | -1.0153  |
| ERRFI1   | -1.24232 | 6.218611 | -3.54491 | 0.00049  | 0.002419 | -1.03459 |
| NAE1     | 0.62134  | 5.455065 | 3.54323  | 0.000493 | 0.002433 | -0.95338 |
| USP22    | -0.5713  | 7.602671 | -3.54178 | 0.000496 | 0.002445 | -1.02775 |
| PPP1R13L | 1.32543  | 6.640896 | 3.541359 | 0.000497 | 0.002447 | -1.008   |
| PSMC3IP  | 1.026614 | 2.159373 | 3.540591 | 0.000498 | 0.002453 | -0.41446 |
| RPS21    | 0.737767 | 8.237642 | 3.540305 | 0.000498 | 0.002455 | -1.04554 |
| ZNF445   | -0.62076 | 4.849667 | -3.54016 | 0.000499 | 0.002455 | -1.00938 |
| RBM6     | -0.51146 | 5.387456 | -3.53953 | 0.0005   | 0.002459 | -1.04023 |
| C4orf41  | -0.4806  | 5.531776 | -3.53955 | 0.0005   | 0.002459 | -1.04559 |
| SUSD4    | -2.09203 | 3.174364 | -3.53803 | 0.000503 | 0.002471 | -0.97013 |

|           |          |          |          |          |          |          |
|-----------|----------|----------|----------|----------|----------|----------|
| YTHDF1    | 0.468574 | 6.407097 | 3.536969 | 0.000504 | 0.00248  | -1.05531 |
| GLIPR2    | -0.96897 | 3.021066 | -3.53574 | 0.000507 | 0.002489 | -0.83338 |
| AGXT2L2   | -0.63873 | 4.241623 | -3.53573 | 0.000507 | 0.002489 | -0.96722 |
| CPXM2     | -1.43742 | 3.018673 | -3.5354  | 0.000507 | 0.00249  | -0.90091 |
| EPB41L1   | -1.27084 | 6.60607  | -3.53547 | 0.000507 | 0.00249  | -1.05798 |
| SCP2      | -0.62126 | 6.903948 | -3.53471 | 0.000508 | 0.002495 | -1.06686 |
| ADCK5     | 1.007455 | 3.362053 | 3.533833 | 0.00051  | 0.002502 | -0.58377 |
| PPARGC1B  | -0.86253 | 2.741911 | -3.53393 | 0.00051  | 0.002502 | -0.76626 |
| DNAJC18   | -0.8538  | 2.150894 | -3.53332 | 0.000511 | 0.002504 | -0.65931 |
| FAM168B   | -0.56582 | 6.873344 | -3.53342 | 0.000511 | 0.002504 | -1.07272 |
| SAMM50    | -0.47586 | 5.281938 | -3.53187 | 0.000514 | 0.002516 | -1.05821 |
| ZFYVE21   | -0.58415 | 4.767616 | -3.53164 | 0.000514 | 0.002518 | -1.02839 |
| STK3      | 0.734184 | 4.865758 | 3.529037 | 0.000519 | 0.00254  | -0.9128  |
| TTLL3     | -0.87413 | 4.122664 | -3.52845 | 0.00052  | 0.002545 | -1.00094 |
| TBC1D7    | 0.858786 | 3.713416 | 3.528134 | 0.000521 | 0.002546 | -0.68195 |
| NUPL2     | 0.657818 | 4.574137 | 3.527986 | 0.000521 | 0.002547 | -0.87707 |
| LPAR1     | -1.20667 | 3.669252 | -3.52768 | 0.000521 | 0.002549 | -0.98361 |
| ZNF615    | -1.05217 | 2.98491  | -3.52558 | 0.000525 | 0.002566 | -0.87255 |
| GTF3C5    | 0.698074 | 5.731668 | 3.525643 | 0.000525 | 0.002566 | -1.03178 |
| RAB8A     | 0.533005 | 6.499323 | 3.524231 | 0.000528 | 0.002577 | -1.09878 |
| CDC14A    | -0.79833 | 3.266788 | -3.52148 | 0.000533 | 0.002602 | -0.8955  |
| GLTSCR2   | -0.71312 | 7.056499 | -3.52073 | 0.000534 | 0.002608 | -1.10827 |
| C1orf26   | -0.54128 | 2.885082 | -3.52028 | 0.000535 | 0.002611 | -0.78289 |
| SAMD4A    | -1.0999  | 4.053453 | -3.51979 | 0.000536 | 0.002615 | -1.04213 |
| HSD17B6   | -1.27551 | 0.337383 | -3.5179  | 0.00054  | 0.002631 | -0.51135 |
| PDZD2     | -1.25374 | 4.223974 | -3.51747 | 0.000541 | 0.002634 | -1.07767 |
| SELP      | -1.84648 | 1.53336  | -3.5167  | 0.000542 | 0.002641 | -0.75935 |
| KIAA0556  | -0.47709 | 5.144962 | -3.51557 | 0.000544 | 0.00265  | -1.10348 |
| ZNF554    | -0.69022 | 2.092576 | -3.51509 | 0.000545 | 0.002653 | -0.6838  |
| PTEN      | -0.51126 | 6.453177 | -3.51515 | 0.000545 | 0.002653 | -1.14041 |
| TCEANC    | -0.71995 | 0.659492 | -3.5145  | 0.000546 | 0.002658 | -0.50356 |
| TNFAIP8L1 | 0.873108 | 3.731143 | 3.513876 | 0.000548 | 0.002663 | -0.72975 |
| PAK1IP1   | 0.843828 | 4.266655 | 3.511794 | 0.000552 | 0.002681 | -0.84183 |
| SLC1A5    | 0.783232 | 7.72024  | 3.511443 | 0.000552 | 0.002684 | -1.15111 |
| ZNF681    | -1.62059 | 1.037224 | -3.51125 | 0.000553 | 0.002684 | -0.66082 |
| SECISBP2  | -0.50457 | 5.085865 | -3.51121 | 0.000553 | 0.002684 | -1.11521 |
| MMP13     | 5.208106 | 1.254364 | 3.509024 | 0.000557 | 0.002704 | -0.38579 |
| TBCEL     | -1.0023  | 3.180147 | -3.50871 | 0.000558 | 0.002706 | -0.95572 |
| PTPN2     | 0.651325 | 4.943788 | 3.507872 | 0.000559 | 0.002713 | -1.00525 |
| PPP1R14B  | 1.002655 | 5.405895 | 3.507618 | 0.00056  | 0.002715 | -1.02574 |
| UBXN10    | -1.90608 | 1.378377 | -3.50676 | 0.000561 | 0.002722 | -0.76942 |
| ITGB8     | 1.407367 | 6.680135 | 3.504823 | 0.000565 | 0.00274  | -1.12564 |
| STK40     | -0.71487 | 6.357449 | -3.50395 | 0.000567 | 0.002747 | -1.17609 |
| RPAP3     | 0.540767 | 5.009647 | 3.503279 | 0.000568 | 0.002752 | -1.04276 |
| EFNA1     | 0.928913 | 6.264928 | 3.503329 | 0.000568 | 0.002752 | -1.1329  |
| NUDT15    | 0.76821  | 4.609743 | 3.502447 | 0.00057  | 0.002759 | -0.94939 |
| PTPRB     | -1.29736 | 4.605621 | -3.50188 | 0.000571 | 0.002764 | -1.1575  |
| TMEM150A  | -0.58826 | 3.368426 | -3.50045 | 0.000574 | 0.002777 | -0.95012 |
| FASTKD1   | 0.639269 | 4.54151  | 3.50034  | 0.000574 | 0.002777 | -0.96489 |
| IFI27     | 1.597653 | 7.426765 | 3.499192 | 0.000577 | 0.002787 | -1.1776  |
| IQGAP2    | -2.01626 | 4.639807 | -3.4973  | 0.000581 | 0.002805 | -1.19165 |
| C10orf116 | -1.43061 | 4.212867 | -3.49642 | 0.000582 | 0.002812 | -1.15623 |
| TRNP1     | -1.77976 | 4.549868 | -3.49648 | 0.000582 | 0.002812 | -1.18832 |
| SUPT16H   | 0.53843  | 7.098973 | 3.495894 | 0.000583 | 0.002816 | -1.20472 |
| RUNDC2A   | -0.73527 | 1.808776 | -3.49538 | 0.000584 | 0.002819 | -0.7098  |
| PBX1      | -1.44234 | 5.623934 | -3.49536 | 0.000585 | 0.002819 | -1.20313 |
| ZFP30     | -1.28089 | 2.024502 | -3.49508 | 0.000585 | 0.002821 | -0.83043 |
| PES1      | 0.544515 | 6.001041 | 3.494601 | 0.000586 | 0.002825 | -1.1686  |

|                 |          |          |          |          |          |          |
|-----------------|----------|----------|----------|----------|----------|----------|
| PGPEP1          | -1.24039 | 4.440451 | -3.49416 | 0.000587 | 0.002828 | -1.16931 |
| PAK2            | 0.591502 | 7.707645 | 3.493912 | 0.000588 | 0.00283  | -1.20653 |
| TK2             | -0.6226  | 4.213752 | -3.4938  | 0.000588 | 0.00283  | -1.10113 |
| SAA2            | 3.745345 | 1.051786 | 3.493081 | 0.000589 | 0.002835 | -0.43512 |
| CD44            | 1.240457 | 9.100231 | 3.493126 | 0.000589 | 0.002835 | -1.19129 |
| PSMB7           | 0.648847 | 6.380548 | 3.493029 | 0.000589 | 0.002835 | -1.19152 |
| HAPLN3          | 1.517908 | 3.493725 | 3.492395 | 0.000591 | 0.00284  | -0.6755  |
| ZBTB20          | -1.05044 | 2.127954 | -3.49194 | 0.000592 | 0.002843 | -0.81968 |
| RAB11B          | -0.49617 | 6.977058 | -3.49192 | 0.000592 | 0.002843 | -1.20888 |
| ZNF366          | -1.27161 | 0.265075 | -3.49171 | 0.000592 | 0.002843 | -0.58569 |
| E2F4            | 0.547059 | 6.449084 | 3.491704 | 0.000592 | 0.002843 | -1.20351 |
| C20orf160       | -1.06398 | 0.681136 | -3.49132 | 0.000593 | 0.002846 | -0.61409 |
| ANKHD1-EIF4EBP3 | -0.8981  | 5.358382 | -3.48856 | 0.000599 | 0.002873 | -1.21999 |
| RIPK2           | 0.913016 | 4.562796 | 3.488135 | 0.0006   | 0.002876 | -0.96214 |
| RASL12          | -1.20077 | 2.818219 | -3.48584 | 0.000604 | 0.002898 | -0.99975 |
| GRK5            | -1.06658 | 4.128036 | -3.48576 | 0.000605 | 0.002898 | -1.15706 |
| OLFML2B         | 2.337333 | 4.109047 | 3.485395 | 0.000605 | 0.002901 | -0.67938 |
| GJB3            | 2.965597 | 5.366609 | 3.484419 | 0.000608 | 0.002908 | -0.77629 |
| LGALS9C         | -1.96159 | 1.088853 | -3.48452 | 0.000607 | 0.002908 | -0.79167 |
| THY1            | 1.42008  | 6.157959 | 3.484364 | 0.000608 | 0.002908 | -1.1432  |
| C16orf52        | -0.58315 | 3.908266 | -3.48336 | 0.00061  | 0.002918 | -1.09424 |
| PRKD1           | -1.3489  | 1.523775 | -3.48307 | 0.00061  | 0.00292  | -0.79202 |
| PON2            | 1.120785 | 5.761272 | 3.482419 | 0.000612 | 0.002925 | -1.13718 |
| GOLGA6L10       | -0.71708 | 2.511504 | -3.47936 | 0.000618 | 0.002956 | -0.87612 |
| C12orf56        | 3.350613 | -0.13676 | 3.479021 | 0.000619 | 0.002958 | -0.47643 |
| SH2D3A          | 1.218863 | 4.511372 | 3.479103 | 0.000619 | 0.002958 | -0.92449 |
| TRMT112         | 0.83835  | 5.574772 | 3.478625 | 0.00062  | 0.002961 | -1.15754 |
| MMP1            | 4.784129 | 6.11084  | 3.477219 | 0.000623 | 0.002974 | -0.66653 |
| BRPF3           | -0.65058 | 6.067745 | -3.47669 | 0.000624 | 0.002979 | -1.26772 |
| KPTN            | 0.837    | 2.571861 | 3.476407 | 0.000625 | 0.002981 | -0.68631 |
| OPHN1           | -0.72005 | 3.848603 | -3.47593 | 0.000626 | 0.002985 | -1.12545 |
| POLDIP3         | -0.45337 | 6.402179 | -3.47484 | 0.000628 | 0.002995 | -1.27377 |
| ZFP82           | -1.36034 | 0.258359 | -3.47423 | 0.00063  | 0.003    | -0.65155 |
| C18orf45        | 1.036411 | 3.614439 | 3.473768 | 0.000631 | 0.003004 | -0.81484 |
| TMEM120A        | -0.6458  | 4.298605 | -3.47281 | 0.000633 | 0.003014 | -1.18099 |
| PKM2            | 0.818165 | 10.43042 | 3.472382 | 0.000634 | 0.003017 | -1.20576 |
| PRDM5           | -1.43743 | 0.668831 | -3.47209 | 0.000634 | 0.003018 | -0.71417 |
| EDEM2           | 0.641275 | 4.846061 | 3.472111 | 0.000634 | 0.003018 | -1.10815 |
| WWC2            | -0.91288 | 4.505658 | -3.47154 | 0.000636 | 0.003023 | -1.22753 |
| SLMO2           | 0.629923 | 6.724797 | 3.471331 | 0.000636 | 0.003024 | -1.27719 |
| TMEM102         | 0.871538 | 3.801422 | 3.470049 | 0.000639 | 0.003037 | -0.88277 |
| EPHX2           | -1.25184 | 3.579703 | -3.46954 | 0.00064  | 0.003041 | -1.16656 |
| LOC400027       | -0.60343 | 2.885838 | -3.46821 | 0.000643 | 0.003054 | -0.96698 |
| LOH3CR2A        | -0.92566 | 1.175452 | -3.46712 | 0.000646 | 0.003065 | -0.73851 |
| STAP2           | 1.335494 | 5.012117 | 3.467051 | 0.000646 | 0.003065 | -1.04021 |
| PLEK2           | 2.48625  | 4.544172 | 3.466788 | 0.000646 | 0.003066 | -0.775   |
| PFDN6           | 0.931865 | 3.493099 | 3.466416 | 0.000647 | 0.003069 | -0.83424 |
| PALM2-AKAP2     | -1.0419  | 5.361021 | -3.46619 | 0.000648 | 0.003071 | -1.2963  |
| PSMD2           | 0.724842 | 7.872051 | 3.465996 | 0.000648 | 0.003072 | -1.29704 |
| RAB6B           | -1.31314 | 2.866235 | -3.46556 | 0.000649 | 0.003075 | -1.08857 |
| C1orf59         | 2.193239 | 2.894098 | 3.46446  | 0.000652 | 0.003086 | -0.62504 |
| TLE1            | -0.81407 | 5.423132 | -3.46432 | 0.000652 | 0.003087 | -1.29917 |
| CSAD            | -0.7102  | 3.621922 | -3.46419 | 0.000652 | 0.003087 | -1.13079 |
| IGFBP6          | -1.7121  | 4.09146  | -3.46396 | 0.000653 | 0.003088 | -1.26964 |
| C3orf39         | -0.75585 | 4.063982 | -3.46354 | 0.000654 | 0.003092 | -1.19592 |
| FAM70A          | -1.56684 | 0.679945 | -3.46335 | 0.000654 | 0.003092 | -0.75747 |
| SFRS12IP1       | -0.6725  | 5.724851 | -3.46333 | 0.000654 | 0.003092 | -1.30741 |
| SOD3            | -1.52427 | 4.969314 | -3.45928 | 0.000664 | 0.003135 | -1.31742 |

|          |          |          |          |          |          |          |
|----------|----------|----------|----------|----------|----------|----------|
| TWISTNB  | 0.570795 | 5.3311   | 3.456502 | 0.00067  | 0.003164 | -1.22964 |
| LPCAT1   | 1.055137 | 6.004939 | 3.456473 | 0.00067  | 0.003164 | -1.25336 |
| SVIP     | -1.40454 | 3.206556 | -3.45629 | 0.000671 | 0.003164 | -1.17851 |
| SYNPO    | -1.1187  | 6.921838 | -3.45625 | 0.000671 | 0.003164 | -1.31397 |
| SLC25A12 | -0.76526 | 4.69159  | -3.45601 | 0.000671 | 0.003166 | -1.2835  |
| PGAM5    | 0.702011 | 5.091235 | 3.455015 | 0.000673 | 0.003176 | -1.19169 |
| NBPF1    | -0.69939 | 4.673415 | -3.45283 | 0.000679 | 0.003199 | -1.2874  |
| ATP13A3  | 0.615025 | 7.891286 | 3.452314 | 0.00068  | 0.003204 | -1.3395  |
| PMAIP1   | 1.608632 | 4.072085 | 3.448896 | 0.000688 | 0.003241 | -0.8883  |
| C7orf28B | 0.664226 | 5.165111 | 3.448644 | 0.000689 | 0.003243 | -1.22641 |
| ARHGEF12 | -0.51362 | 7.80893  | -3.44819 | 0.00069  | 0.003247 | -1.33058 |
| CCBP2    | -1.32376 | 0.666108 | -3.44794 | 0.00069  | 0.003249 | -0.77747 |
| KLHL22   | -0.59014 | 3.980909 | -3.44779 | 0.000691 | 0.003249 | -1.21985 |
| RNF2     | 0.623323 | 4.666224 | 3.444697 | 0.000698 | 0.003284 | -1.17119 |
| NUAK2    | 1.782308 | 4.986317 | 3.444501 | 0.000699 | 0.003285 | -1.03327 |
| YWHAE    | 0.520125 | 8.661299 | 3.443766 | 0.0007   | 0.003292 | -1.34689 |
| ZNF501   | -0.91728 | 1.320848 | -3.443   | 0.000702 | 0.0033   | -0.83186 |
| POR      | 0.734987 | 6.718399 | 3.442668 | 0.000703 | 0.003302 | -1.36704 |
| AMPH     | -1.33583 | 0.272126 | -3.4425  | 0.000704 | 0.003303 | -0.75178 |
| CLU      | -1.9937  | 7.209721 | -3.44239 | 0.000704 | 0.003303 | -1.32568 |
| POP7     | 0.849596 | 4.288795 | 3.441961 | 0.000705 | 0.003307 | -1.07057 |
| DHFR     | 1.033094 | 3.992011 | 3.441548 | 0.000706 | 0.003311 | -0.98438 |
| NAA25    | 0.44267  | 5.557248 | 3.440662 | 0.000708 | 0.00332  | -1.31554 |
| FAM40B   | 2.172364 | 2.766484 | 3.439864 | 0.00071  | 0.003328 | -0.69238 |
| UBA6     | 0.723521 | 6.424404 | 3.439621 | 0.000711 | 0.003329 | -1.36424 |
| KDM1A    | 0.610623 | 6.489836 | 3.439623 | 0.000711 | 0.003329 | -1.37255 |
| CXorf36  | -0.97019 | 3.213167 | -3.43873 | 0.000713 | 0.003338 | -1.18243 |
| C1QTNF6  | 1.952672 | 4.231898 | 3.438519 | 0.000713 | 0.003339 | -0.89328 |
| TRIM8    | -0.56332 | 6.79898  | -3.43809 | 0.000714 | 0.003343 | -1.38658 |
| ATP13A4  | -2.31199 | 1.373172 | -3.43638 | 0.000719 | 0.003361 | -1.05428 |
| FOSL2    | -0.80997 | 7.899605 | -3.43637 | 0.000719 | 0.003361 | -1.35756 |
| EPCAM    | 2.127189 | 7.611339 | 3.434683 | 0.000723 | 0.00338  | -1.37036 |
| MAML3    | -0.86621 | 4.078802 | -3.43416 | 0.000724 | 0.003385 | -1.30364 |
| OSCAR    | 1.719493 | 1.145228 | 3.43389  | 0.000725 | 0.003387 | -0.62492 |
| HSD17B12 | -0.61811 | 6.737557 | -3.43293 | 0.000727 | 0.003397 | -1.40344 |
| C3orf57  | -2.06911 | 1.914804 | -3.43157 | 0.000731 | 0.003412 | -1.13508 |
| PELI2    | -1.34222 | 4.143591 | -3.43117 | 0.000732 | 0.003415 | -1.35821 |
| ARHGAP8  | 1.53297  | 3.965917 | 3.429354 | 0.000737 | 0.003435 | -0.93767 |
| CALD1    | -1.41024 | 8.31456  | -3.4294  | 0.000736 | 0.003435 | -1.34969 |
| SLC22A5  | -0.58316 | 3.692753 | -3.42796 | 0.00074  | 0.00345  | -1.24053 |
| FUNDC2   | -0.53868 | 5.034137 | -3.4272  | 0.000742 | 0.003458 | -1.388   |
| CAMK2D   | -0.75139 | 6.022608 | -3.4269  | 0.000743 | 0.003461 | -1.42943 |
| TEAD1    | -0.69612 | 6.633707 | -3.4264  | 0.000744 | 0.003466 | -1.4251  |
| ZNF221   | -1.17321 | 0.178737 | -3.42565 | 0.000746 | 0.003474 | -0.77778 |
| PDCL3    | 0.575741 | 3.805425 | 3.425075 | 0.000748 | 0.003479 | -1.08202 |
| KCNJ8    | -1.05474 | 2.236655 | -3.42428 | 0.00075  | 0.003488 | -1.06057 |
| MIIP     | 0.779064 | 4.009751 | 3.423215 | 0.000752 | 0.003499 | -1.08921 |
| CPM      | -1.40774 | 4.640094 | -3.42315 | 0.000753 | 0.003499 | -1.42005 |
| CLDN18   | -3.69606 | 3.258446 | -3.42246 | 0.000754 | 0.003506 | -1.40922 |
| KIAA0415 | 0.533544 | 5.088332 | 3.421807 | 0.000756 | 0.003513 | -1.31737 |
| FOXO1    | 3.232535 | 2.317775 | 3.421206 | 0.000758 | 0.003519 | -0.65915 |
| NAA10    | 0.582372 | 5.436795 | 3.420689 | 0.000759 | 0.003524 | -1.3556  |
| PPARA    | -0.72534 | 5.913566 | -3.4204  | 0.00076  | 0.003527 | -1.44992 |
| SEC16A   | -0.56858 | 7.954102 | -3.41858 | 0.000765 | 0.003547 | -1.42012 |
| TMEM57   | -0.51112 | 5.235006 | -3.41863 | 0.000764 | 0.003547 | -1.42731 |
| C1orf21  | -0.91595 | 5.355976 | -3.41785 | 0.000767 | 0.003555 | -1.45021 |
| PSMD10   | 0.524789 | 5.436971 | 3.417262 | 0.000768 | 0.003561 | -1.37204 |
| ILF3     | 0.400056 | 8.145924 | 3.415123 | 0.000774 | 0.003586 | -1.4505  |



|          |          |          |          |          |          |          |
|----------|----------|----------|----------|----------|----------|----------|
| CTSA     | 0.676125 | 7.591548 | 3.413354 | 0.000779 | 0.003607 | -1.47124 |
| RNF214   | -0.4633  | 4.012821 | -3.41318 | 0.000779 | 0.003608 | -1.32094 |
| ADCY3    | 0.805268 | 6.092223 | 3.412715 | 0.00078  | 0.003612 | -1.42345 |
| SYTL2    | -1.62747 | 4.271773 | -3.41118 | 0.000784 | 0.00363  | -1.44747 |
| OAS1     | 1.465543 | 5.845453 | 3.410973 | 0.000785 | 0.003632 | -1.34027 |
| QDPR     | -0.61114 | 4.049374 | -3.41069 | 0.000786 | 0.003634 | -1.35009 |
| TAF6     | 0.667589 | 6.296017 | 3.41018  | 0.000787 | 0.003639 | -1.45488 |
| ETV7     | 1.738263 | 3.079491 | 3.408861 | 0.000791 | 0.003655 | -0.86346 |
| GPRC5B   | -1.57587 | 4.204067 | -3.40861 | 0.000791 | 0.003656 | -1.44921 |
| SPATA20  | -0.75439 | 5.375442 | -3.4087  | 0.000791 | 0.003656 | -1.47599 |
| SLC25A22 | 0.804352 | 5.389444 | 3.407116 | 0.000796 | 0.003673 | -1.37101 |
| C1orf96  | 0.811747 | 4.361878 | 3.406376 | 0.000798 | 0.003682 | -1.2052  |
| FAM115A  | -0.77939 | 3.475006 | -3.40596 | 0.000799 | 0.003686 | -1.30368 |
| GLE1     | 0.584559 | 5.651014 | 3.405189 | 0.000801 | 0.003694 | -1.42637 |
| NT5DC2   | 1.018675 | 5.845142 | 3.404268 | 0.000803 | 0.003705 | -1.41005 |
| ADAMTS14 | 2.138422 | 3.048428 | 3.403928 | 0.000804 | 0.003708 | -0.83465 |
| HSPBAP1  | 0.731462 | 3.218644 | 3.401965 | 0.00081  | 0.003732 | -1.02558 |
| TBCB     | 0.713952 | 5.426448 | 3.401514 | 0.000811 | 0.003736 | -1.40362 |
| SFRS2B   | -0.56023 | 5.54726  | -3.39957 | 0.000817 | 0.00376  | -1.50573 |
| LNX1     | -1.03882 | 3.760662 | -3.39913 | 0.000818 | 0.003765 | -1.39512 |
| RCE1     | 0.709736 | 4.418368 | 3.398017 | 0.000821 | 0.003778 | -1.25988 |
| DNTTIP1  | 0.679423 | 5.092543 | 3.397429 | 0.000823 | 0.003783 | -1.37993 |
| BRP44    | -0.71975 | 5.164263 | -3.39744 | 0.000823 | 0.003783 | -1.50119 |
| IVD      | -1.00327 | 5.571526 | -3.39712 | 0.000824 | 0.003786 | -1.52296 |
| AIM1L    | 3.770881 | 3.762193 | 3.396994 | 0.000824 | 0.003787 | -0.78645 |
| QTRTD1   | 0.627812 | 4.957887 | 3.396258 | 0.000826 | 0.003795 | -1.37192 |
| SUMF1    | -0.68993 | 4.640273 | -3.39617 | 0.000826 | 0.003795 | -1.46619 |
| SLC9A2   | -2.08977 | 2.792781 | -3.39607 | 0.000826 | 0.003795 | -1.38494 |
| CNTNAP1  | -1.05416 | 3.65324  | -3.39461 | 0.000831 | 0.003813 | -1.39954 |
| EHMT2    | 0.571247 | 6.407867 | 3.393537 | 0.000834 | 0.003826 | -1.51883 |
| PRR5     | 0.814324 | 4.41889  | 3.392752 | 0.000836 | 0.003835 | -1.25824 |
| GAS2L3   | 1.614121 | 2.366479 | 3.392483 | 0.000837 | 0.003837 | -0.85075 |
| MMD      | 1.215907 | 4.015597 | 3.392313 | 0.000837 | 0.003838 | -1.11743 |
| PGF      | 2.204633 | 3.320626 | 3.390995 | 0.000841 | 0.003854 | -0.89953 |
| IRF9     | 0.820067 | 5.847445 | 3.389601 | 0.000845 | 0.003872 | -1.47439 |
| WDR4     | 0.688222 | 3.786471 | 3.38813  | 0.000849 | 0.003889 | -1.17469 |
| DPY19L1  | 0.93018  | 5.811281 | 3.388028 | 0.00085  | 0.003889 | -1.4656  |
| HNRNPAB  | 0.514888 | 7.747237 | 3.388016 | 0.00085  | 0.003889 | -1.54783 |
| WBSCR27  | 2.045351 | 0.786931 | 3.387831 | 0.00085  | 0.003889 | -0.75812 |
| PPT1     | 0.809176 | 7.116421 | 3.387798 | 0.00085  | 0.003889 | -1.55211 |
| MAGOHB   | 0.761654 | 3.752686 | 3.386497 | 0.000854 | 0.003904 | -1.16044 |
| FBXL19   | 0.672386 | 5.050274 | 3.386499 | 0.000854 | 0.003904 | -1.41035 |
| C1orf85  | 0.603599 | 5.336332 | 3.386233 | 0.000855 | 0.003906 | -1.45275 |
| C18orf54 | 1.30489  | 2.725936 | 3.384677 | 0.00086  | 0.003926 | -0.94582 |
| TPRG1L   | -0.60557 | 6.044106 | -3.38444 | 0.00086  | 0.003928 | -1.56569 |
| SLC22A4  | 1.352059 | 0.489263 | 3.383762 | 0.000862 | 0.003936 | -0.76972 |
| PPP1R9B  | 0.50462  | 6.519608 | 3.382493 | 0.000866 | 0.003952 | -1.56125 |
| USP43    | 1.395553 | 3.71291  | 3.382312 | 0.000867 | 0.003953 | -1.0675  |
| STOX2    | -1.414   | 1.838256 | -3.38217 | 0.000867 | 0.003954 | -1.17909 |
| SLC2A10  | -1.23783 | 4.214494 | -3.38195 | 0.000868 | 0.003955 | -1.51478 |
| NLN      | 0.788179 | 4.486095 | 3.381793 | 0.000868 | 0.003956 | -1.31151 |
| FLJ45340 | -0.63299 | 6.13108  | -3.38112 | 0.00087  | 0.003964 | -1.57662 |
| YARS2    | 0.626478 | 4.110002 | 3.380984 | 0.000871 | 0.003965 | -1.27022 |
| RASSF2   | -1.12855 | 3.768387 | -3.38085 | 0.000871 | 0.003965 | -1.46481 |
| RAC2     | 1.527208 | 5.216249 | 3.38006  | 0.000873 | 0.003975 | -1.32483 |
| JUND     | -0.77896 | 7.620484 | -3.37946 | 0.000875 | 0.003982 | -1.5501  |
| NUP155   | 0.822707 | 5.685155 | 3.379015 | 0.000876 | 0.003986 | -1.49191 |
| MAPK9    | -0.52538 | 5.658098 | -3.3785  | 0.000878 | 0.003992 | -1.57589 |

|           |          |          |          |          |          |          |
|-----------|----------|----------|----------|----------|----------|----------|
| PRR5L     | 2.069962 | 3.043204 | 3.378182 | 0.000879 | 0.003995 | -0.92263 |
| KDM1B     | 0.782035 | 5.435799 | 3.377518 | 0.000881 | 0.004002 | -1.47381 |
| UBAP2L    | 0.391763 | 7.816962 | 3.37751  | 0.000881 | 0.004002 | -1.57797 |
| PUF60     | 0.618275 | 6.898174 | 3.377286 | 0.000882 | 0.004004 | -1.58518 |
| SHROOM3   | -2.01581 | 6.423407 | -3.37717 | 0.000882 | 0.004004 | -1.55888 |
| OSM       | 1.852445 | 0.036583 | 3.37663  | 0.000884 | 0.004009 | -0.7903  |
| BEND7     | -1.53089 | 2.876039 | -3.37665 | 0.000884 | 0.004009 | -1.40214 |
| FHOD1     | 0.703142 | 4.817163 | 3.376468 | 0.000884 | 0.00401  | -1.40208 |
| KCTD7     | -0.72553 | 3.338562 | -3.37608 | 0.000885 | 0.004014 | -1.36778 |
| DCBLD1    | 1.182847 | 4.871372 | 3.375772 | 0.000886 | 0.004017 | -1.33335 |
| NUP205    | 0.611442 | 6.801804 | 3.375264 | 0.000888 | 0.004022 | -1.58966 |
| GART      | 0.537096 | 6.383789 | 3.374763 | 0.000889 | 0.004028 | -1.57913 |
| LNPEP     | -0.7233  | 4.353271 | -3.37417 | 0.000891 | 0.004033 | -1.51183 |
| DEK       | 0.605018 | 7.632307 | 3.374089 | 0.000891 | 0.004033 | -1.59551 |
| SFRS18    | -0.70254 | 6.386048 | -3.3741  | 0.000891 | 0.004033 | -1.59645 |
| TPD52L2   | 0.523703 | 6.970073 | 3.373387 | 0.000894 | 0.004042 | -1.60016 |
| UBE2G2    | -0.48716 | 5.404413 | -3.3716  | 0.000899 | 0.004065 | -1.58617 |
| ACSS1     | -1.2291  | 5.587215 | -3.37136 | 0.0009   | 0.004067 | -1.60606 |
| ADRB2     | -1.62975 | 1.687373 | -3.3712  | 0.0009   | 0.004068 | -1.21977 |
| IRAK3     | -1.36832 | 4.036122 | -3.37065 | 0.000902 | 0.004075 | -1.54422 |
| CNOT6L    | -0.60775 | 5.791672 | -3.37032 | 0.000903 | 0.004078 | -1.60727 |
| RAB3D     | -0.88019 | 6.296109 | -3.37005 | 0.000904 | 0.00408  | -1.60815 |
| BECN1     | -0.39637 | 6.030525 | -3.36909 | 0.000907 | 0.004093 | -1.6124  |
| ZEB2      | -1.03677 | 4.369665 | -3.36887 | 0.000908 | 0.004094 | -1.55613 |
| MAPK6     | 0.815386 | 7.247497 | 3.368768 | 0.000908 | 0.004094 | -1.6146  |
| HIST2H4A  | 1.680096 | 3.448396 | 3.367654 | 0.000911 | 0.004109 | -1.04559 |
| TM4SF19   | 3.736467 | 1.070457 | 3.367215 | 0.000913 | 0.004114 | -0.82128 |
| TBC1D4    | -0.9918  | 5.53637  | -3.36686 | 0.000914 | 0.004117 | -1.61888 |
| SFRS9     | 0.478198 | 6.291891 | 3.366035 | 0.000916 | 0.004128 | -1.60515 |
| TRIB3     | 1.815324 | 4.782186 | 3.365891 | 0.000917 | 0.004128 | -1.23708 |
| IPO4      | 0.754144 | 6.004807 | 3.365783 | 0.000917 | 0.004129 | -1.57004 |
| SIX1      | 3.06922  | 1.776365 | 3.365326 | 0.000919 | 0.004134 | -0.82819 |
| DPY19L3   | -0.72842 | 4.140497 | -3.36432 | 0.000922 | 0.004147 | -1.52068 |
| MFI2      | 3.270648 | 4.292505 | 3.364176 | 0.000922 | 0.004147 | -0.98098 |
| CCNE2     | 1.297714 | 3.624    | 3.363925 | 0.000923 | 0.00415  | -1.12731 |
| GLRX3     | 0.717807 | 5.661761 | 3.361497 | 0.000931 | 0.004183 | -1.55533 |
| COMMD4    | 0.578522 | 5.174556 | 3.36123  | 0.000932 | 0.004185 | -1.51628 |
| FBXO8     | -0.49951 | 4.002173 | -3.36065 | 0.000933 | 0.004192 | -1.49172 |
| BMS1      | 0.426874 | 6.165086 | 3.36061  | 0.000934 | 0.004192 | -1.61838 |
| PLCL2     | -1.22938 | 2.35073  | -3.36048 | 0.000934 | 0.004192 | -1.31015 |
| LILRB5    | -1.50466 | 0.285491 | -3.35823 | 0.000941 | 0.004222 | -1.03222 |
| ZFYVE9    | -0.60726 | 4.820489 | -3.35825 | 0.000941 | 0.004222 | -1.59665 |
| RHOT1     | -0.4539  | 5.29297  | -3.35668 | 0.000946 | 0.004243 | -1.62588 |
| SAR1B     | -0.5441  | 4.66201  | -3.35584 | 0.000949 | 0.004254 | -1.58486 |
| RNF38     | -0.56703 | 5.689598 | -3.35543 | 0.00095  | 0.004258 | -1.65128 |
| LOC113230 | -1.28986 | 2.707621 | -3.3553  | 0.000951 | 0.004259 | -1.40124 |
| SELK      | -0.49591 | 4.340426 | -3.3548  | 0.000952 | 0.004264 | -1.55089 |
| SMARCA2   | -0.85656 | 6.212809 | -3.35475 | 0.000952 | 0.004264 | -1.65809 |
| PSAP      | -0.55365 | 9.972127 | -3.35381 | 0.000956 | 0.004276 | -1.56248 |
| NCLN      | 0.555317 | 7.005235 | 3.352679 | 0.000959 | 0.004292 | -1.66594 |
| CCDC96    | -0.71118 | 0.359881 | -3.35181 | 0.000962 | 0.004303 | -0.98343 |
| PDRG1     | 0.62204  | 3.904064 | 3.351182 | 0.000964 | 0.004311 | -1.32551 |
| PDCD10    | 0.602264 | 5.611984 | 3.350541 | 0.000966 | 0.004318 | -1.59518 |
| PLOD3     | 1.069253 | 6.544194 | 3.350533 | 0.000966 | 0.004318 | -1.63664 |
| FAM100B   | 0.621248 | 6.087873 | 3.350114 | 0.000968 | 0.004322 | -1.63529 |
| NUDT13    | -0.8789  | 0.734974 | -3.34909 | 0.000971 | 0.004336 | -1.04821 |
| C9orf95   | -0.78887 | 3.745092 | -3.34767 | 0.000976 | 0.004356 | -1.53046 |
| PASK      | 0.836453 | 3.934291 | 3.34744  | 0.000977 | 0.004358 | -1.30329 |

|           |          |          |          |          |          |          |
|-----------|----------|----------|----------|----------|----------|----------|
| TACC2     | -0.95108 | 6.876426 | -3.34695 | 0.000978 | 0.004364 | -1.66947 |
| CREB3L2   | -0.75114 | 6.621841 | -3.34634 | 0.00098  | 0.004371 | -1.68016 |
| MRS2      | -0.51173 | 4.939459 | -3.34601 | 0.000981 | 0.004375 | -1.63809 |
| ZIC2      | 3.851418 | 1.50582  | 3.345721 | 0.000982 | 0.004378 | -0.88681 |
| KRT80     | 3.687365 | 5.299309 | 3.344625 | 0.000986 | 0.004393 | -1.11762 |
| SGCB      | -0.87381 | 5.243811 | -3.34403 | 0.000988 | 0.004401 | -1.68084 |
| ESYT2     | -0.70557 | 7.260305 | -3.34372 | 0.000989 | 0.004404 | -1.67575 |
| EFHC2     | -1.49976 | -0.06035 | -3.34283 | 0.000992 | 0.004416 | -1.04168 |
| MAPK10    | -1.52845 | 1.689687 | -3.34223 | 0.000994 | 0.004422 | -1.29654 |
| RNPEP     | 0.621066 | 6.789722 | 3.34227  | 0.000994 | 0.004422 | -1.69378 |
| PIIB      | 0.584867 | 7.947034 | 3.341936 | 0.000995 | 0.004425 | -1.69154 |
| USP42     | 0.504331 | 5.109144 | 3.341357 | 0.000997 | 0.004432 | -1.57962 |
| ATR       | 0.656928 | 5.905747 | 3.341161 | 0.000998 | 0.004434 | -1.64681 |
| SAAL1     | 0.708381 | 3.301045 | 3.340725 | 0.000999 | 0.004439 | -1.23336 |
| NMB       | 1.660489 | 3.04796  | 3.339601 | 0.001003 | 0.004455 | -1.08494 |
| SLC30A4   | -0.75631 | 2.730655 | -3.33912 | 0.001005 | 0.00446  | -1.37294 |
| XBP1      | -0.98794 | 7.420699 | -3.33907 | 0.001005 | 0.00446  | -1.67837 |
| TOR3A     | 0.635392 | 5.189495 | 3.338508 | 0.001007 | 0.004467 | -1.58398 |
| OLA1      | 0.538021 | 6.446235 | 3.338429 | 0.001007 | 0.004467 | -1.69706 |
| LOC283174 | -1.71589 | 1.248134 | -3.33701 | 0.001012 | 0.004487 | -1.26308 |
| LRP10     | -0.80824 | 8.255167 | -3.33691 | 0.001012 | 0.004487 | -1.66354 |
| MSMP      | -0.64235 | 1.230391 | -3.33643 | 0.001014 | 0.004493 | -1.12293 |
| C1orf130  | -2.11395 | 0.117556 | -3.33548 | 0.001017 | 0.004506 | -1.1413  |
| SFMBT2    | -1.20371 | 1.149925 | -3.33518 | 0.001018 | 0.004509 | -1.18253 |
| NT5DC1    | -0.61351 | 5.039809 | -3.3349  | 0.001019 | 0.004512 | -1.68702 |
| TIGD6     | -0.41075 | 2.263694 | -3.33385 | 0.001023 | 0.004525 | -1.24833 |
| ASAM      | -1.36653 | 2.789957 | -3.33393 | 0.001023 | 0.004525 | -1.50406 |
| C7orf70   | 0.631831 | 4.31037  | 3.333532 | 0.001024 | 0.004529 | -1.45833 |
| C1orf131  | 0.644591 | 4.142951 | 3.332741 | 0.001027 | 0.00454  | -1.42417 |
| AGPAT9    | -1.2991  | 2.798785 | -3.33233 | 0.001028 | 0.004545 | -1.49387 |
| PIK3C2A   | -0.58888 | 6.635849 | -3.33143 | 0.001031 | 0.004557 | -1.72956 |
| C14orf80  | 0.834466 | 3.398841 | 3.33129  | 0.001032 | 0.004558 | -1.25907 |
| RPGRIP1L  | 0.917485 | 2.944593 | 3.3303   | 0.001035 | 0.004572 | -1.18551 |
| BTRC      | -0.46258 | 4.816671 | -3.32976 | 0.001037 | 0.004577 | -1.67512 |
| ADI1      | -0.55999 | 5.975274 | -3.32985 | 0.001037 | 0.004577 | -1.73775 |
| GTF2H3    | 0.676213 | 4.014302 | 3.329266 | 0.001039 | 0.004583 | -1.40611 |
| RIPK1     | -0.47826 | 5.577108 | -3.32853 | 0.001042 | 0.004593 | -1.72979 |
| ATP11A    | 1.123234 | 6.859188 | 3.327683 | 0.001045 | 0.004605 | -1.72444 |
| G6PD      | 1.357633 | 7.009135 | 3.327079 | 0.001047 | 0.004613 | -1.72263 |
| BAZ2B     | -0.6227  | 5.869469 | -3.32606 | 0.00105  | 0.004628 | -1.74889 |
| ATXN1L    | -0.46435 | 6.192108 | -3.32422 | 0.001057 | 0.004655 | -1.7568  |
| ALDH4A1   | -0.86496 | 4.993101 | -3.32256 | 0.001063 | 0.00468  | -1.73623 |
| SLC28A3   | 3.426238 | 1.76105  | 3.322433 | 0.001063 | 0.004681 | -0.95691 |
| GNAL      | -1.28407 | 2.379884 | -3.32198 | 0.001065 | 0.004686 | -1.45312 |
| WDR46     | 0.515332 | 5.226997 | 3.321827 | 0.001065 | 0.004687 | -1.65345 |
| CD3EAP    | 0.639677 | 4.443935 | 3.320702 | 0.00107  | 0.004704 | -1.52227 |
| AHSA1     | 0.56146  | 6.315968 | 3.319492 | 0.001074 | 0.004722 | -1.74959 |
| PRKG1     | -1.19367 | 1.66546  | -3.3188  | 0.001076 | 0.004731 | -1.31271 |
| EPAS1     | -0.862   | 8.002702 | -3.31716 | 0.001082 | 0.004756 | -1.7323  |
| TGFA      | 1.520152 | 5.472596 | 3.316751 | 0.001084 | 0.00476  | -1.57158 |
| CSK       | 0.626598 | 6.559847 | 3.316705 | 0.001084 | 0.00476  | -1.76659 |
| TAF4      | 0.526269 | 5.404398 | 3.31623  | 0.001086 | 0.004767 | -1.68898 |
| USP46     | -0.63222 | 4.649591 | -3.31577 | 0.001088 | 0.004773 | -1.7174  |
| AATF      | 0.494472 | 5.936857 | 3.315545 | 0.001088 | 0.004775 | -1.74176 |
| ZC3H12B   | -1.31939 | 1.295132 | -3.31525 | 0.00109  | 0.004778 | -1.27864 |
| DHX32     | -0.52221 | 5.583734 | -3.31292 | 0.001098 | 0.004814 | -1.78046 |
| PPP2R1B   | -0.66112 | 5.501207 | -3.31124 | 0.001104 | 0.00484  | -1.78682 |
| ACAA1     | -0.71046 | 5.07284  | -3.31091 | 0.001106 | 0.004844 | -1.76961 |

|           |          |          |          |          |          |          |
|-----------|----------|----------|----------|----------|----------|----------|
| SKA2      | 0.702597 | 5.35939  | 3.310747 | 0.001106 | 0.004845 | -1.6839  |
| ZNF846    | -0.73069 | 1.855371 | -3.30978 | 0.00111  | 0.00486  | -1.30355 |
| TIMP1     | 1.160854 | 7.734263 | 3.309605 | 0.001111 | 0.004861 | -1.80184 |
| ZBTB33    | 0.534572 | 5.947166 | 3.309075 | 0.001113 | 0.004868 | -1.76003 |
| TP53INP2  | -1.17459 | 6.508121 | -3.30668 | 0.001122 | 0.004906 | -1.79945 |
| CUEDC1    | -0.76466 | 4.137554 | -3.30586 | 0.001125 | 0.004918 | -1.70792 |
| C20orf199 | 0.785979 | 5.969769 | 3.304676 | 0.001129 | 0.004936 | -1.75674 |
| SNX33     | -0.62583 | 5.609325 | -3.30134 | 0.001142 | 0.004991 | -1.82044 |
| LETMD1    | -0.56113 | 4.951646 | -3.30095 | 0.001144 | 0.004996 | -1.78383 |
| IL8       | 4.346318 | 5.111869 | 3.300724 | 0.001144 | 0.004998 | -1.15613 |
| MEIS2     | -0.81118 | 3.547317 | -3.30043 | 0.001145 | 0.005001 | -1.65332 |
| FOSB      | -2.03269 | 5.588401 | -3.29983 | 0.001148 | 0.00501  | -1.82085 |
| MFSD2A    | 1.867408 | 3.961767 | 3.29942  | 0.001149 | 0.005015 | -1.30327 |
| C5orf30   | -0.80432 | 3.748922 | -3.29709 | 0.001158 | 0.005053 | -1.69001 |
| C10orf72  | -1.11992 | 3.012902 | -3.29696 | 0.001159 | 0.005054 | -1.62073 |
| SLC39A4   | 1.412549 | 5.154002 | 3.296187 | 0.001162 | 0.005066 | -1.59584 |
| ADORA2B   | 2.519421 | 3.140299 | 3.295816 | 0.001163 | 0.005067 | -1.14312 |
| PSME1     | 0.613863 | 6.970181 | 3.295966 | 0.001163 | 0.005067 | -1.84288 |
| ANKS1A    | -0.56923 | 6.258421 | -3.29585 | 0.001163 | 0.005067 | -1.84553 |
| CYB5R3    | -0.50486 | 8.062616 | -3.2951  | 0.001166 | 0.005078 | -1.80981 |
| GTF2H4    | 0.560463 | 4.16656  | 3.294872 | 0.001167 | 0.00508  | -1.56236 |
| HYAL2     | -0.48844 | 5.39879  | -3.29471 | 0.001168 | 0.00508  | -1.82804 |
| VMA21     | 0.579564 | 6.49075  | 3.294698 | 0.001168 | 0.00508  | -1.83437 |
| CTSL2     | 2.787142 | 4.258115 | 3.293276 | 0.001173 | 0.005101 | -1.24747 |
| SMCR7     | -0.52082 | 3.246258 | -3.29334 | 0.001173 | 0.005101 | -1.57626 |
| MT2A      | -1.56391 | 6.290573 | -3.29319 | 0.001174 | 0.005101 | -1.83814 |
| IMMP2L    | -0.78839 | 1.370224 | -3.29292 | 0.001175 | 0.005104 | -1.29188 |
| MAD1L1    | 0.708059 | 4.865298 | 3.292623 | 0.001176 | 0.005108 | -1.67339 |
| TGS1      | 0.557999 | 5.286508 | 3.290081 | 0.001186 | 0.00515  | -1.75473 |
| EBF1      | -0.97934 | 2.639839 | -3.28994 | 0.001187 | 0.005151 | -1.54572 |
| KHSRP     | 0.471554 | 7.434559 | 3.289713 | 0.001188 | 0.005153 | -1.86244 |
| RILP      | -0.76643 | 2.84667  | -3.28952 | 0.001188 | 0.005155 | -1.54882 |
| LRWD1     | 0.744121 | 4.187322 | 3.288942 | 0.001191 | 0.005164 | -1.55239 |
| BDP1      | -0.51672 | 6.012113 | -3.28871 | 0.001192 | 0.005166 | -1.86657 |
| XRCC4     | 0.870648 | 2.992045 | 3.288382 | 0.001193 | 0.00517  | -1.32515 |
| MAPK13    | 0.891587 | 6.226537 | 3.28781  | 0.001195 | 0.005178 | -1.8223  |
| SNHG3     | 1.001633 | 2.822256 | 3.287636 | 0.001196 | 0.00518  | -1.29003 |
| HLA-C     | 0.995545 | 9.39036  | 3.287092 | 0.001198 | 0.005186 | -1.83481 |
| HEATR2    | 0.628642 | 6.200086 | 3.287152 | 0.001198 | 0.005186 | -1.84008 |
| PTGER4    | -1.13662 | 3.905182 | -3.28584 | 0.001203 | 0.005206 | -1.77796 |
| SH2D5     | 2.827927 | 0.319527 | 3.285247 | 0.001206 | 0.005214 | -1.06411 |
| SPATS2L   | 0.626656 | 6.947954 | 3.285262 | 0.001206 | 0.005214 | -1.87566 |
| RNF114    | 0.570641 | 6.316632 | 3.284875 | 0.001207 | 0.005218 | -1.85711 |
| LSM6      | 0.703355 | 3.503137 | 3.284565 | 0.001208 | 0.005222 | -1.44381 |
| C9orf172  | -1.05346 | 1.878808 | -3.28334 | 0.001213 | 0.005242 | -1.43831 |
| C14orf145 | 0.88042  | 2.709193 | 3.282653 | 0.001216 | 0.005253 | -1.30501 |
| ZNF397OS  | -0.6621  | 3.436076 | -3.28205 | 0.001219 | 0.005262 | -1.66943 |
| CCDC66    | -0.50706 | 3.18068  | -3.28133 | 0.001222 | 0.005273 | -1.59707 |
| ANG       | -1.33078 | 2.589162 | -3.27986 | 0.001228 | 0.005297 | -1.62038 |
| PRAME     | 5.446364 | 1.482447 | 3.27966  | 0.001228 | 0.005299 | -1.08349 |
| SLC2A5    | 2.122108 | 1.384435 | 3.278623 | 0.001233 | 0.005316 | -1.08766 |
| ZC3H13    | -0.60302 | 7.302532 | -3.2767  | 0.001241 | 0.005349 | -1.88678 |
| FTSJ1     | 0.579299 | 5.39184  | 3.276497 | 0.001242 | 0.005351 | -1.80647 |
| PLEKHH3   | -0.72486 | 5.019459 | -3.27621 | 0.001243 | 0.005354 | -1.87545 |
| KRCC1     | -0.78673 | 4.256667 | -3.27611 | 0.001243 | 0.005354 | -1.81517 |
| THOC3     | 0.972495 | 5.696946 | 3.275925 | 0.001244 | 0.005356 | -1.803   |
| MAPKSP1   | -0.46531 | 5.42138  | -3.27419 | 0.001251 | 0.005386 | -1.89195 |
| CMTM1     | 1.080343 | 2.452016 | 3.273922 | 0.001252 | 0.005389 | -1.27561 |

|                 |          |          |          |          |          |          |
|-----------------|----------|----------|----------|----------|----------|----------|
| FBXW8           | -0.48227 | 4.538109 | -3.27378 | 0.001253 | 0.00539  | -1.82464 |
| TKT             | 0.890781 | 8.064645 | 3.273182 | 0.001255 | 0.005399 | -1.90937 |
| ARMC6           | 0.548251 | 4.992451 | 3.272762 | 0.001257 | 0.005405 | -1.77454 |
| CYB5B           | 0.644014 | 6.403131 | 3.272479 | 0.001258 | 0.005409 | -1.89658 |
| OSBPL3          | 0.78041  | 6.020999 | 3.272165 | 0.00126  | 0.005413 | -1.86252 |
| MRPS17          | 0.915255 | 3.984977 | 3.270801 | 0.001266 | 0.005436 | -1.53907 |
| PARM1           | -1.53666 | 4.426614 | -3.26882 | 0.001274 | 0.00547  | -1.90231 |
| SNRPB2          | 0.68805  | 5.428206 | 3.268384 | 0.001276 | 0.005477 | -1.82464 |
| SLC22A20        | 2.203902 | 0.368611 | 3.26789  | 0.001278 | 0.005484 | -1.11525 |
| PRDM2           | -0.54531 | 5.969292 | -3.26702 | 0.001282 | 0.005498 | -1.93362 |
| CBX2            | 2.797239 | 3.876347 | 3.266421 | 0.001284 | 0.005508 | -1.28349 |
| GLO1            | 0.556639 | 7.386639 | 3.266298 | 0.001285 | 0.005508 | -1.93652 |
| STX17           | -0.48384 | 5.568917 | -3.26605 | 0.001286 | 0.005511 | -1.92457 |
| CBWD3           | 1.232046 | 4.144712 | 3.264817 | 0.001291 | 0.005532 | -1.53272 |
| RBM42           | 0.535345 | 5.762208 | 3.264625 | 0.001292 | 0.005534 | -1.88327 |
| GRN             | 0.632229 | 9.085357 | 3.26426  | 0.001294 | 0.005539 | -1.90509 |
| APOBEC3B        | 2.620334 | 3.14848  | 3.263204 | 0.001298 | 0.005557 | -1.23193 |
| MTMR9L          | -0.916   | 1.086784 | -3.26269 | 0.0013   | 0.005565 | -1.36064 |
| IL6R            | -0.98261 | 3.930934 | -3.26219 | 0.001303 | 0.005572 | -1.84069 |
| SCARB2          | -0.60626 | 7.89888  | -3.26157 | 0.001305 | 0.005582 | -1.91613 |
| AZI1            | 0.636742 | 4.122923 | 3.261266 | 0.001307 | 0.005586 | -1.64368 |
| WBP2            | -0.48622 | 6.819143 | -3.26074 | 0.001309 | 0.005594 | -1.94852 |
| HIP1R           | -0.77078 | 6.178208 | -3.26056 | 0.00131  | 0.005596 | -1.95408 |
| ITPA            | 0.668913 | 4.934128 | 3.258678 | 0.001318 | 0.005628 | -1.79435 |
| GSTT1           | -2.64379 | 2.653374 | -3.25873 | 0.001318 | 0.005628 | -1.8483  |
| ISG20L2         | 0.468291 | 5.432798 | 3.257941 | 0.001321 | 0.00564  | -1.8786  |
| TNFRSF18        | 2.770197 | 1.88305  | 3.25687  | 0.001326 | 0.005659 | -1.15095 |
| ISY1            | 0.527263 | 4.494514 | 3.255713 | 0.001331 | 0.005679 | -1.75249 |
| KCTD2           | -0.39978 | 5.335524 | -3.25541 | 0.001332 | 0.005683 | -1.94223 |
| B3GNTL1         | 0.887383 | 1.561265 | 3.255076 | 0.001334 | 0.005686 | -1.2541  |
| FUBP1           | 0.427293 | 6.246002 | 3.255165 | 0.001334 | 0.005686 | -1.95223 |
| ZSWIM4          | 0.834973 | 5.200696 | 3.254933 | 0.001335 | 0.005687 | -1.82313 |
| LOC729991-MEF2B | 1.062052 | 0.441511 | 3.254077 | 0.001338 | 0.0057   | -1.15854 |
| TIPRL           | 0.419103 | 5.429385 | 3.254045 | 0.001339 | 0.0057   | -1.89476 |
| MSL3L2          | 1.815165 | 3.333835 | 3.252906 | 0.001344 | 0.005717 | -1.36612 |
| TBC1D8          | -0.70599 | 5.451376 | -3.25306 | 0.001343 | 0.005717 | -1.9672  |
| PPP1R3B         | -1.05398 | 5.338006 | -3.25293 | 0.001344 | 0.005717 | -1.97237 |
| PERP            | 1.542155 | 9.63078  | 3.252217 | 0.001347 | 0.005728 | -1.95035 |
| ZNF14           | -0.8692  | 2.683192 | -3.25184 | 0.001348 | 0.005733 | -1.65348 |
| S100B           | -1.30265 | 0.934413 | -3.25127 | 0.001351 | 0.005743 | -1.42163 |
| C7orf27         | 0.521568 | 6.205555 | 3.250477 | 0.001355 | 0.005756 | -1.95988 |
| ACSF2           | -0.93229 | 3.369575 | -3.24976 | 0.001358 | 0.005768 | -1.79676 |
| C5orf24         | -0.49965 | 6.108815 | -3.24902 | 0.001361 | 0.005781 | -1.99037 |
| NFKBIE          | 1.250433 | 4.056487 | 3.248852 | 0.001362 | 0.005782 | -1.56178 |
| FAM155B         | -2.15451 | -0.14719 | -3.24864 | 0.001363 | 0.005784 | -1.38277 |
| WDR74           | 0.647579 | 4.876793 | 3.2483   | 0.001364 | 0.005789 | -1.8207  |
| CBLC            | 2.157522 | 5.040854 | 3.248136 | 0.001365 | 0.005789 | -1.58573 |
| TMEM175         | -0.62104 | 4.180022 | -3.24805 | 0.001366 | 0.005789 | -1.87731 |
| MTUS1           | -0.97722 | 6.954732 | -3.24802 | 0.001366 | 0.005789 | -1.97554 |
| CYP7B1          | -1.37188 | 1.269608 | -3.24774 | 0.001367 | 0.005792 | -1.49022 |
| C2orf86         | -0.67063 | 2.164246 | -3.24771 | 0.001367 | 0.005792 | -1.53505 |
| B3GALNT1        | -0.90552 | 3.761743 | -3.24759 | 0.001368 | 0.005792 | -1.85791 |
| PPIEL           | -1.00743 | 0.843038 | -3.24619 | 0.001374 | 0.005814 | -1.38985 |
| GLS             | 0.842232 | 6.809704 | 3.246194 | 0.001374 | 0.005814 | -1.98723 |
| DOPEY2          | -0.97363 | 5.728219 | -3.24632 | 0.001373 | 0.005814 | -1.99793 |
| FAP             | 3.273371 | 3.362783 | 3.245724 | 0.001376 | 0.005818 | -1.25045 |
| TBKBP1          | -0.74409 | 3.528596 | -3.24578 | 0.001376 | 0.005818 | -1.81152 |
| FAM160B1        | -0.43613 | 5.277546 | -3.24583 | 0.001376 | 0.005818 | -1.9701  |

|            |          |          |          |          |          |          |
|------------|----------|----------|----------|----------|----------|----------|
| AKIRIN2    | 0.526538 | 5.535617 | 3.245246 | 0.001378 | 0.005825 | -1.92293 |
| ZBTB9      | 0.609516 | 3.767061 | 3.24511  | 0.001379 | 0.005826 | -1.62902 |
| HIST2H2AA3 | 1.755697 | 3.979538 | 3.244323 | 0.001383 | 0.005839 | -1.48822 |
| TCF20      | 0.557957 | 6.812888 | 3.244291 | 0.001383 | 0.005839 | -2.00104 |
| PHC2       | -0.53831 | 6.825627 | -3.24396 | 0.001384 | 0.005843 | -1.99928 |
| CROCCL2    | -0.76348 | 1.968349 | -3.2438  | 0.001385 | 0.005845 | -1.52721 |
| CYP39A1    | -1.41435 | 1.200047 | -3.24344 | 0.001387 | 0.00585  | -1.49789 |
| MMP10      | 4.482564 | 2.244555 | 3.242253 | 0.001392 | 0.005867 | -1.1945  |
| ADAM12     | 3.698986 | 4.062473 | 3.242457 | 0.001391 | 0.005867 | -1.28534 |
| RBMS3      | -1.21116 | 0.76886  | -3.24221 | 0.001392 | 0.005867 | -1.41621 |
| PRDX1      | 0.679015 | 8.420058 | 3.242277 | 0.001392 | 0.005867 | -1.99344 |
| DDX21      | 0.593323 | 7.480819 | 3.242097 | 0.001393 | 0.005867 | -2.01044 |
| MREG       | 1.35458  | 4.146321 | 3.241979 | 0.001393 | 0.005868 | -1.58214 |
| FNDC3A     | -0.78215 | 6.544321 | -3.24145 | 0.001396 | 0.005876 | -2.0079  |
| WRB        | -0.60311 | 3.913516 | -3.24047 | 0.0014   | 0.005894 | -1.86622 |
| RNF152     | -1.15582 | 1.959937 | -3.2403  | 0.001401 | 0.005895 | -1.59519 |
| SUV39H1    | 0.932524 | 4.062141 | 3.239966 | 0.001403 | 0.0059   | -1.64537 |
| C9orf156   | -0.42629 | 3.162036 | -3.23907 | 0.001407 | 0.005916 | -1.70867 |
| POLR2G     | 0.554927 | 5.24002  | 3.237259 | 0.001416 | 0.005948 | -1.91283 |
| RHOBTB3    | -1.21763 | 5.390738 | -3.23732 | 0.001415 | 0.005948 | -2.02356 |
| TGFB1I1    | -1.01483 | 4.889766 | -3.23714 | 0.001416 | 0.005949 | -2.00275 |
| GRHL2      | 1.468881 | 5.784137 | 3.236769 | 0.001418 | 0.005954 | -1.87526 |
| PSMB5      | 0.557477 | 6.24129  | 3.235469 | 0.001424 | 0.005978 | -2.0063  |
| ANKLE2     | 0.505124 | 6.536382 | 3.234266 | 0.00143  | 0.006    | -2.0256  |
| CCDC104    | -0.54064 | 4.354511 | -3.23281 | 0.001437 | 0.006028 | -1.93655 |
| C22orf25   | -0.44357 | 4.432049 | -3.23263 | 0.001437 | 0.006029 | -1.93576 |
| NOTCH3     | 1.249617 | 8.675004 | 3.231545 | 0.001443 | 0.00605  | -2.03167 |
| KIAA1199   | 3.116563 | 5.120252 | 3.231278 | 0.001444 | 0.006053 | -1.50981 |
| TRPC1      | -1.20689 | 1.70281  | -3.23098 | 0.001445 | 0.006057 | -1.59159 |
| VPS26B     | -0.57329 | 5.846677 | -3.22809 | 0.001459 | 0.006114 | -2.05173 |
| PLP2       | 0.923697 | 7.722018 | 3.227787 | 0.001461 | 0.006118 | -2.05465 |
| SAMD9      | 1.629071 | 6.936344 | 3.226916 | 0.001465 | 0.006134 | -2.01164 |
| IPO9       | 0.502708 | 7.083811 | 3.226532 | 0.001467 | 0.00614  | -2.0597  |
| MFAP2      | 2.694495 | 4.453315 | 3.226258 | 0.001468 | 0.006144 | -1.48828 |
| RPP25      | 1.086069 | 4.799203 | 3.225795 | 0.00147  | 0.006151 | -1.80253 |
| TPST2      | 0.784574 | 4.855762 | 3.225519 | 0.001472 | 0.006153 | -1.86732 |
| PSMD4      | 0.476546 | 6.63851  | 3.225425 | 0.001472 | 0.006153 | -2.05664 |
| NUP188     | 0.542782 | 7.279254 | 3.225501 | 0.001472 | 0.006153 | -2.06271 |
| SART3      | 0.341899 | 5.992382 | 3.224668 | 0.001476 | 0.006167 | -2.03634 |
| HNRNPK     | 0.280478 | 8.501237 | 3.224225 | 0.001478 | 0.006174 | -2.03679 |
| SYNJ2      | -0.71337 | 5.544738 | -3.22323 | 0.001483 | 0.006193 | -2.062   |
| ZNF177     | -1.26657 | 0.003215 | -3.22265 | 0.001486 | 0.006203 | -1.38801 |
| ZNF549     | -1.13174 | 2.074737 | -3.22133 | 0.001492 | 0.006228 | -1.67326 |
| SEC31B     | -0.93188 | 2.00046  | -3.22055 | 0.001496 | 0.006242 | -1.6287  |
| KIAA0776   | -0.51214 | 5.800922 | -3.22004 | 0.001499 | 0.006251 | -2.07423 |
| C6orf150   | 1.800674 | 3.433083 | 3.218839 | 0.001505 | 0.006274 | -1.48332 |
| CSRP2BP    | -0.52991 | 4.843264 | -3.21862 | 0.001506 | 0.006277 | -2.02699 |
| SR140      | 0.545391 | 7.226646 | 3.21854  | 0.001506 | 0.006277 | -2.08419 |
| TRA2B      | 0.401981 | 7.112944 | 3.218088 | 0.001509 | 0.006284 | -2.08567 |
| RSRC1      | 0.74115  | 4.476796 | 3.217897 | 0.001509 | 0.006286 | -1.82761 |
| ACSL1      | -0.90476 | 6.277797 | -3.21565 | 0.001521 | 0.006331 | -2.08913 |
| PEX12      | -0.49505 | 2.785898 | -3.21555 | 0.001521 | 0.006332 | -1.71907 |
| DPF1       | 2.509893 | 0.068495 | 3.215299 | 0.001523 | 0.006335 | -1.26784 |
| GATA6      | -2.062   | 4.224198 | -3.21491 | 0.001524 | 0.006341 | -2.07474 |
| POFUT1     | 0.649772 | 6.913417 | 3.214781 | 0.001525 | 0.006342 | -2.09164 |
| ZNF19      | -0.64147 | 1.068701 | -3.21342 | 0.001532 | 0.006369 | -1.4756  |
| ZNF629     | -0.52761 | 5.251136 | -3.21298 | 0.001534 | 0.006376 | -2.07369 |
| ZNF708     | -0.95159 | 2.546686 | -3.2128  | 0.001535 | 0.006378 | -1.75854 |

|          |          |          |          |          |          |          |
|----------|----------|----------|----------|----------|----------|----------|
| RAD50    | -0.49372 | 6.070958 | -3.21264 | 0.001536 | 0.006379 | -2.10137 |
| ZNF764   | -0.52686 | 3.19488  | -3.21228 | 0.001538 | 0.006385 | -1.81387 |
| CA8      | -2.18043 | 0.786678 | -3.21066 | 0.001546 | 0.006417 | -1.63038 |
| TRAF4    | 0.754128 | 6.042091 | 3.210286 | 0.001548 | 0.006423 | -2.05583 |
| RBPJ     | -0.46602 | 5.543979 | -3.20974 | 0.001551 | 0.006433 | -2.09574 |
| FARSA    | 0.534252 | 5.929513 | 3.209493 | 0.001552 | 0.006437 | -2.06603 |
| AMIGO1   | -1.03845 | 1.633229 | -3.20885 | 0.001555 | 0.006448 | -1.61709 |
| C7orf28A | 0.633275 | 5.207457 | 3.207575 | 0.001562 | 0.006474 | -1.99101 |
| KLF11    | -0.62082 | 4.667514 | -3.20738 | 0.001563 | 0.006476 | -2.05273 |
| RUSC1    | 0.484035 | 5.843569 | 3.207194 | 0.001564 | 0.006478 | -2.07    |
| SLC38A6  | 0.813969 | 2.531654 | 3.206397 | 0.001568 | 0.006493 | -1.51852 |
| ZNF641   | -0.52305 | 3.108001 | -3.2062  | 0.001569 | 0.006495 | -1.81619 |
| RABIF    | 0.541204 | 4.20883  | 3.205305 | 0.001574 | 0.006513 | -1.84994 |
| ADIPOR2  | -0.57801 | 6.59175  | -3.20462 | 0.001577 | 0.006525 | -2.12288 |
| GRIN2D   | 4.067568 | 4.35467  | 3.204382 | 0.001578 | 0.006525 | -1.39318 |
| HSFX2    | -0.80313 | 0.582925 | -3.20439 | 0.001578 | 0.006525 | -1.46232 |
| ZNF704   | -1.20769 | 2.827434 | -3.20435 | 0.001579 | 0.006525 | -1.8832  |
| GAR1     | 0.519134 | 4.000221 | 3.203701 | 0.001582 | 0.006536 | -1.81676 |
| ZNF37A   | -0.61907 | 4.595405 | -3.20373 | 0.001582 | 0.006536 | -2.05671 |
| SPINK1   | -3.09649 | 1.601714 | -3.20283 | 0.001587 | 0.006548 | -1.92694 |
| PDHX     | -0.53587 | 5.037295 | -3.20289 | 0.001586 | 0.006548 | -2.09067 |
| ROCK1    | -0.61363 | 6.904995 | -3.20295 | 0.001586 | 0.006548 | -2.12182 |
| HIF1A    | 0.762617 | 8.404104 | 3.202651 | 0.001587 | 0.006551 | -2.11661 |
| SMAD7    | -0.66027 | 4.03588  | -3.20253 | 0.001588 | 0.006551 | -2.0035  |
| CEP152   | 0.824518 | 3.411512 | 3.201597 | 0.001593 | 0.006569 | -1.65877 |
| RPL15    | -0.52123 | 9.014686 | -3.20147 | 0.001594 | 0.00657  | -2.06626 |
| WISP1    | 2.427121 | 2.174793 | 3.201242 | 0.001595 | 0.006573 | -1.34706 |
| CYP3A5   | -2.15157 | 2.715434 | -3.19989 | 0.001602 | 0.006601 | -1.9902  |
| C7orf47  | 0.879496 | 3.636851 | 3.199363 | 0.001605 | 0.00661  | -1.69681 |
| C15orf23 | 0.856674 | 4.417631 | 3.199167 | 0.001606 | 0.006613 | -1.8505  |
| WBSCR22  | 0.622506 | 5.668797 | 3.198169 | 0.001611 | 0.00663  | -2.07052 |
| ATP8B1   | -1.1127  | 6.841972 | -3.19824 | 0.001611 | 0.00663  | -2.12735 |
| HLA-A    | 0.968869 | 9.370443 | 3.197978 | 0.001612 | 0.006633 | -2.10844 |
| GABARAP  | -0.52402 | 7.372851 | -3.19764 | 0.001614 | 0.006638 | -2.12935 |
| RAP2C    | 0.525817 | 5.526471 | 3.19683  | 0.001618 | 0.006654 | -2.06951 |
| NIT2     | 0.64913  | 4.838811 | 3.196561 | 0.00162  | 0.006658 | -1.97252 |
| KDELC1   | 1.016201 | 2.376855 | 3.195558 | 0.001625 | 0.006678 | -1.50909 |
| GJB2     | 2.758786 | 7.133969 | 3.1942   | 0.001632 | 0.006706 | -2.02643 |
| PLEKHN1  | 2.319821 | 2.575529 | 3.193806 | 0.001634 | 0.006711 | -1.40913 |
| ADAM10   | 0.601529 | 6.715681 | 3.193888 | 0.001634 | 0.006711 | -2.15144 |
| LEO1     | 0.548651 | 4.938613 | 3.190603 | 0.001652 | 0.00678  | -2.01834 |
| SULT1A1  | -0.99505 | 2.237952 | -3.19016 | 0.001654 | 0.006788 | -1.77305 |
| CDRT4    | -0.64742 | 2.924499 | -3.19006 | 0.001655 | 0.006788 | -1.84881 |
| ZC3HAV1L | 0.946715 | 2.731098 | 3.189458 | 0.001658 | 0.006799 | -1.58054 |
| OTUD1    | -0.69916 | 4.669997 | -3.18871 | 0.001662 | 0.006814 | -2.11514 |
| ANAPC7   | 0.518725 | 5.715866 | 3.18846  | 0.001663 | 0.006817 | -2.11352 |
| CIRH1A   | 0.594961 | 5.989944 | 3.188377 | 0.001664 | 0.006817 | -2.1306  |
| SIL1     | -0.556   | 4.690244 | -3.18796 | 0.001666 | 0.006825 | -2.10786 |
| SUN2     | -0.65331 | 7.028451 | -3.18725 | 0.00167  | 0.006839 | -2.16617 |
| CACNA2D1 | -1.64759 | 1.923305 | -3.18702 | 0.001671 | 0.006842 | -1.83475 |
| ABCB1    | -1.40082 | 1.348045 | -3.18634 | 0.001675 | 0.006855 | -1.69368 |
| NGLY1    | -0.51221 | 4.25348  | -3.18549 | 0.00168  | 0.006872 | -2.06555 |
| CTF1     | -1.17548 | 2.307262 | -3.1845  | 0.001685 | 0.006893 | -1.83825 |
| PRMT3    | 0.653715 | 4.59992  | 3.183511 | 0.001691 | 0.006913 | -1.96978 |
| CDC14B   | -0.88667 | 4.512428 | -3.18293 | 0.001694 | 0.006924 | -2.13254 |
| SLC25A46 | -0.4813  | 4.941101 | -3.18223 | 0.001698 | 0.006938 | -2.14197 |
| RPL36A   | 0.932374 | 2.89734  | 3.181313 | 0.001703 | 0.006957 | -1.62852 |
| STRA6    | 3.946002 | 2.656533 | 3.1802   | 0.001709 | 0.006981 | -1.37481 |

|           |          |          |          |          |          |          |
|-----------|----------|----------|----------|----------|----------|----------|
| DCUN1D5   | 0.822427 | 4.34114  | 3.179941 | 0.001711 | 0.006984 | -1.90157 |
| RBM12B    | 0.590618 | 4.706476 | 3.179773 | 0.001712 | 0.006984 | -2.00952 |
| TOMM5     | 0.700118 | 5.508756 | 3.179769 | 0.001712 | 0.006984 | -2.10283 |
| MRPS25    | -0.55651 | 4.992406 | -3.17952 | 0.001713 | 0.006988 | -2.15937 |
| RBM34     | 0.546598 | 4.83824  | 3.179352 | 0.001714 | 0.00699  | -2.03867 |
| RHOJ      | -0.92342 | 2.469358 | -3.1777  | 0.001723 | 0.007026 | -1.846   |
| C3orf21   | 0.999716 | 4.736677 | 3.177558 | 0.001724 | 0.007027 | -1.95564 |
| UQCR11    | -0.53376 | 5.763938 | -3.17676 | 0.001729 | 0.007043 | -2.20508 |
| PCSK9     | 4.24606  | 4.051391 | 3.174987 | 0.001739 | 0.00708  | -1.43726 |
| ZNF527    | -0.70954 | 1.909485 | -3.17498 | 0.001739 | 0.00708  | -1.71781 |
| AP1G1     | -0.44845 | 7.096937 | -3.17452 | 0.001741 | 0.007089 | -2.20701 |
| FCGR3A    | 2.631767 | 4.109095 | 3.174294 | 0.001743 | 0.007092 | -1.60546 |
| AMPD2     | 0.578734 | 5.497472 | 3.173711 | 0.001746 | 0.007099 | -2.13143 |
| SEPP1     | -1.68512 | 6.874449 | -3.17389 | 0.001745 | 0.007099 | -2.18493 |
| DIP2A     | -0.51654 | 5.488021 | -3.17375 | 0.001746 | 0.007099 | -2.20417 |
| OSBPL1A   | -0.85704 | 5.196408 | -3.17362 | 0.001746 | 0.007099 | -2.20423 |
| ESAM      | -0.87897 | 4.458803 | -3.17346 | 0.001747 | 0.007101 | -2.15639 |
| SLMO1     | 1.269984 | 0.754877 | 3.173034 | 0.00175  | 0.007109 | -1.40135 |
| SLC35A2   | 0.728835 | 5.288103 | 3.172867 | 0.001751 | 0.007111 | -2.09484 |
| ZNF552    | -0.7357  | 3.047669 | -3.17257 | 0.001752 | 0.007115 | -1.93898 |
| HPS3      | 0.729558 | 5.619398 | 3.172496 | 0.001753 | 0.007115 | -2.13309 |
| MFSD8     | -0.45654 | 3.907049 | -3.17169 | 0.001757 | 0.007132 | -2.05531 |
| LOC401052 | -0.71657 | 0.150589 | -3.17084 | 0.001762 | 0.007147 | -1.5044  |
| MAGEE1    | -1.37431 | 0.83657  | -3.17077 | 0.001763 | 0.007147 | -1.65877 |
| PSMD12    | 0.492195 | 5.817849 | 3.170787 | 0.001763 | 0.007147 | -2.17741 |
| ZNF879    | -1.32028 | 0.483983 | -3.17006 | 0.001767 | 0.007162 | -1.60763 |
| LRR4B     | -1.05743 | 0.924251 | -3.16974 | 0.001769 | 0.007167 | -1.63533 |
| S100A16   | 1.223099 | 8.076541 | 3.169556 | 0.00177  | 0.00717  | -2.23012 |
| C22orf9   | 0.824209 | 6.771535 | 3.168975 | 0.001773 | 0.007181 | -2.22151 |
| FEZ2      | -0.43193 | 4.842405 | -3.16887 | 0.001774 | 0.007181 | -2.17009 |
| VPS24     | -0.3851  | 7.131199 | -3.16879 | 0.001774 | 0.007181 | -2.22476 |
| CST1      | 6.44899  | 3.727719 | 3.168095 | 0.001778 | 0.007196 | -1.41104 |
| LSM14B    | 0.508455 | 5.021696 | 3.167488 | 0.001782 | 0.007208 | -2.10345 |
| KCNJ14    | 0.929841 | 1.835102 | 3.166832 | 0.001786 | 0.007221 | -1.53999 |
| DCAF5     | -0.50528 | 6.296279 | -3.16673 | 0.001786 | 0.007222 | -2.2413  |
| NOC4L     | 0.616718 | 4.848505 | 3.164682 | 0.001798 | 0.007268 | -2.0739  |
| CPXM1     | 2.426308 | 3.039821 | 3.164586 | 0.001799 | 0.007268 | -1.52889 |
| ZNF668    | 0.458753 | 3.709294 | 3.163153 | 0.001807 | 0.0073   | -1.89208 |
| P4HTM     | -0.97035 | 3.784816 | -3.16146 | 0.001817 | 0.007338 | -2.12763 |
| CA11      | -1.01094 | 2.125009 | -3.16128 | 0.001818 | 0.007339 | -1.84569 |
| DIABLO    | 0.550105 | 4.628381 | 3.161319 | 0.001818 | 0.007339 | -2.05858 |
| LOC650623 | -0.93367 | 1.902682 | -3.16113 | 0.001819 | 0.00734  | -1.79131 |
| EPHA3     | -1.28575 | 1.844461 | -3.16051 | 0.001823 | 0.007353 | -1.83748 |
| SDCCAG3   | 0.625115 | 4.835996 | 3.159351 | 0.00183  | 0.007379 | -2.08704 |
| CRTAP     | -0.59053 | 7.225064 | -3.15883 | 0.001833 | 0.007389 | -2.24865 |
| P2RY6     | 1.872315 | 2.387194 | 3.158369 | 0.001836 | 0.007398 | -1.53484 |
| SNAP29    | -0.42515 | 5.590576 | -3.15762 | 0.00184  | 0.007414 | -2.25374 |
| OVOL1     | 2.590897 | 4.445509 | 3.155495 | 0.001853 | 0.007463 | -1.7076  |
| INTS6     | -0.48226 | 5.575041 | -3.15504 | 0.001856 | 0.007472 | -2.26287 |
| THAP10    | -0.65384 | 2.00443  | -3.1549  | 0.001857 | 0.007474 | -1.7825  |
| PMS2L1    | 0.867122 | 2.398799 | 3.154574 | 0.001859 | 0.007479 | -1.64901 |
| C1orf174  | 0.460677 | 4.035083 | 3.154245 | 0.001861 | 0.007485 | -1.98147 |
| CD276     | 0.91775  | 6.81685  | 3.152762 | 0.00187  | 0.007519 | -2.26839 |
| MOBK1B    | 0.403917 | 6.161346 | 3.152567 | 0.001871 | 0.007522 | -2.26098 |
| CYP2R1    | -0.63182 | 3.786421 | -3.15234 | 0.001872 | 0.007523 | -2.1175  |
| IGF2BP2   | 1.363994 | 5.979462 | 3.152363 | 0.001872 | 0.007523 | -2.16822 |
| BOD1L     | -0.53516 | 6.517301 | -3.15171 | 0.001876 | 0.007536 | -2.28422 |
| GRB7      | 2.101299 | 5.608381 | 3.14911  | 0.001892 | 0.007598 | -2.00436 |



|           |          |          |          |          |          |          |
|-----------|----------|----------|----------|----------|----------|----------|
| DNAJB4    | -0.95845 | 4.43314  | -3.14873 | 0.001894 | 0.007606 | -2.23512 |
| L1CAM     | -1.73549 | 2.979961 | -3.14727 | 0.001903 | 0.007638 | -2.14822 |
| ABLIM3    | -1.23772 | 3.899124 | -3.14726 | 0.001903 | 0.007638 | -2.20903 |
| ATP5F1    | -0.47263 | 6.916688 | -3.14698 | 0.001905 | 0.007642 | -2.29282 |
| WHSC1     | 0.640099 | 6.959542 | 3.145453 | 0.001915 | 0.007678 | -2.30205 |
| MRAS      | -0.97893 | 3.429823 | -3.14529 | 0.001916 | 0.00768  | -2.13244 |
| MLLT3     | -0.82321 | 3.361755 | -3.14436 | 0.001921 | 0.007701 | -2.09928 |
| SPRN      | -0.71952 | 2.252641 | -3.14184 | 0.001937 | 0.007762 | -1.87256 |
| TESC      | -2.18022 | 1.968154 | -3.14159 | 0.001939 | 0.007767 | -2.05298 |
| ATP2C1    | 0.550406 | 7.353833 | 3.14145  | 0.00194  | 0.007768 | -2.31635 |
| ZNF134    | -1.05218 | 2.91679  | -3.13957 | 0.001952 | 0.007813 | -2.07119 |
| PSIMCT-1  | 1.05932  | 0.060698 | 3.139268 | 0.001954 | 0.007819 | -1.4853  |
| TTC33     | -0.62208 | 4.240901 | -3.1388  | 0.001956 | 0.007828 | -2.21541 |
| SLC25A43  | 0.844406 | 5.231802 | 3.138327 | 0.00196  | 0.007838 | -2.17897 |
| PDGFRA    | -1.23328 | 5.471355 | -3.13766 | 0.001964 | 0.007853 | -2.32609 |
| CTNNA1    | -0.82564 | 4.601857 | -3.13718 | 0.001967 | 0.007863 | -2.27393 |
| SPARC     | 1.129523 | 9.178072 | 3.137089 | 0.001967 | 0.007863 | -2.30199 |
| RPN2      | 0.54171  | 8.591804 | 3.136933 | 0.001968 | 0.007865 | -2.30448 |
| BAT2L2    | 0.378831 | 8.801451 | 3.135989 | 0.001974 | 0.007886 | -2.29637 |
| SFRS5     | -0.48375 | 6.775445 | -3.13585 | 0.001975 | 0.007888 | -2.32844 |
| SCN1B     | -1.02022 | 1.230221 | -3.13475 | 0.001982 | 0.007914 | -1.77506 |
| RABEP1    | -0.46281 | 5.729351 | -3.13438 | 0.001985 | 0.007919 | -2.32958 |
| EFEMP1    | -1.50776 | 4.983117 | -3.13436 | 0.001985 | 0.007919 | -2.33089 |
| MED7      | -0.39857 | 2.837809 | -3.13401 | 0.001987 | 0.007926 | -1.95635 |
| LRRC42    | 0.519158 | 4.75699  | 3.133167 | 0.001993 | 0.007943 | -2.16851 |
| EEF2K     | -0.53122 | 5.901712 | -3.1332  | 0.001992 | 0.007943 | -2.33873 |
| TNFRSF10B | 0.815814 | 6.216926 | 3.132985 | 0.001994 | 0.007946 | -2.29817 |
| C1QBP     | 0.667602 | 6.579092 | 3.132077 | 0.002    | 0.007967 | -2.3303  |
| LILRB4    | 2.106316 | 2.132163 | 3.131698 | 0.002002 | 0.00797  | -1.56756 |
| ZNF141    | -1.17463 | 1.314355 | -3.13175 | 0.002002 | 0.00797  | -1.81567 |
| UBXN8     | -0.70305 | 2.398636 | -3.13167 | 0.002002 | 0.00797  | -1.92814 |
| ALDH1A1   | -2.6787  | 6.124889 | -3.1316  | 0.002003 | 0.00797  | -2.30489 |
| MANBA     | -0.53011 | 4.759066 | -3.13105 | 0.002006 | 0.007982 | -2.28325 |
| TRAPPC2   | -0.5012  | 3.414749 | -3.13067 | 0.002009 | 0.00799  | -2.09697 |
| KCTD6     | -0.57727 | 2.306404 | -3.12931 | 0.002018 | 0.008023 | -1.90088 |
| C1orf126  | -1.33638 | 2.235582 | -3.12886 | 0.002021 | 0.008032 | -2.00806 |
| SNX29     | -0.66865 | 4.858512 | -3.12855 | 0.002023 | 0.008038 | -2.30947 |
| SAE1      | 0.469948 | 6.198359 | 3.128091 | 0.002026 | 0.008047 | -2.33279 |
| AGL       | -0.64424 | 5.743089 | -3.12781 | 0.002028 | 0.008052 | -2.35347 |
| SRA1      | -0.47432 | 4.536086 | -3.12772 | 0.002028 | 0.008053 | -2.26638 |
| C17orf68  | -0.53775 | 4.707147 | -3.12726 | 0.002031 | 0.008062 | -2.29039 |
| TDG       | 0.574267 | 5.17744  | 3.127034 | 0.002033 | 0.008066 | -2.23601 |
| PHLDA2    | 1.467024 | 5.422887 | 3.126393 | 0.002037 | 0.00808  | -2.1534  |
| MRPL17    | 0.599877 | 5.168886 | 3.126333 | 0.002037 | 0.00808  | -2.23404 |
| RRM1      | 0.647858 | 6.54595  | 3.125245 | 0.002044 | 0.008106 | -2.35002 |
| TMEM49    | 0.587476 | 7.130454 | 3.125134 | 0.002045 | 0.008106 | -2.36532 |
| RNF219    | 0.595918 | 4.193632 | 3.124176 | 0.002052 | 0.008129 | -2.07832 |
| LIMD2     | 1.317493 | 3.674927 | 3.123662 | 0.002055 | 0.00814  | -1.86178 |
| ITGB3BP   | 0.58714  | 3.399689 | 3.12313  | 0.002058 | 0.008152 | -1.92866 |
| CAPN2     | -0.66231 | 8.261375 | -3.12296 | 0.00206  | 0.008154 | -2.32232 |
| FER1L6    | -2.4698  | 1.293597 | -3.12233 | 0.002064 | 0.008168 | -2.02131 |
| HEATR5B   | -0.38034 | 5.586148 | -3.12226 | 0.002064 | 0.008168 | -2.35741 |
| BCL2A1    | 1.830783 | 1.45999  | 3.121298 | 0.002071 | 0.008191 | -1.56292 |
| CORO2A    | 1.081194 | 6.002459 | 3.120701 | 0.002075 | 0.008205 | -2.29395 |
| APIP      | -0.58734 | 3.741279 | -3.11999 | 0.002079 | 0.008221 | -2.20097 |
| CCDC55    | -0.57541 | 5.490202 | -3.11991 | 0.00208  | 0.008221 | -2.36746 |
| TRIM66    | -0.67128 | 3.981677 | -3.11942 | 0.002083 | 0.008232 | -2.24602 |
| EIF2S2    | 0.488434 | 6.253519 | 3.119045 | 0.002086 | 0.00824  | -2.36162 |

|              |          |          |          |          |          |          |
|--------------|----------|----------|----------|----------|----------|----------|
| SLC25A32     | 0.549234 | 5.183542 | 3.118904 | 0.002087 | 0.008241 | -2.26341 |
| EIF4ENIF1    | -0.36608 | 4.766145 | -3.11877 | 0.002088 | 0.008242 | -2.30725 |
| ENOPH1       | 0.449768 | 5.595013 | 3.117773 | 0.002094 | 0.008266 | -2.31953 |
| DYM          | -0.51755 | 5.13366  | -3.11757 | 0.002096 | 0.00827  | -2.35264 |
| RWDD1        | -0.46765 | 4.561255 | -3.11697 | 0.0021   | 0.008283 | -2.30072 |
| ZNF621       | -0.55373 | 4.88921  | -3.11636 | 0.002104 | 0.008297 | -2.34007 |
| C14orf49     | -1.10393 | 1.011853 | -3.11594 | 0.002107 | 0.008306 | -1.80836 |
| PIGC         | 0.516038 | 4.41867  | 3.114232 | 0.002119 | 0.00835  | -2.16511 |
| BAIAP3       | -1.12945 | 1.423434 | -3.11367 | 0.002122 | 0.008363 | -1.87611 |
| NFIB         | -1.0364  | 6.556026 | -3.11341 | 0.002124 | 0.008367 | -2.38962 |
| FBXW7        | -0.55262 | 4.442711 | -3.11287 | 0.002128 | 0.008375 | -2.30793 |
| UHRF1BP1L    | -0.4883  | 4.844479 | -3.11288 | 0.002128 | 0.008375 | -2.34185 |
| TMEM219      | -0.56608 | 5.588942 | -3.11277 | 0.002129 | 0.008375 | -2.39188 |
| RAD23B       | 0.463799 | 7.629933 | 3.112776 | 0.002129 | 0.008375 | -2.39677 |
| SPG7         | -0.39752 | 5.714759 | -3.11171 | 0.002136 | 0.008401 | -2.39454 |
| COX4I1       | -0.57076 | 7.836881 | -3.11108 | 0.00214  | 0.008416 | -2.37421 |
| GPI          | 0.640803 | 8.551787 | 3.110713 | 0.002143 | 0.008421 | -2.38599 |
| MAP4K4       | 0.634511 | 7.552369 | 3.11074  | 0.002143 | 0.008421 | -2.40628 |
| GPSM2        | 0.833696 | 5.715168 | 3.10979  | 0.002149 | 0.008444 | -2.32116 |
| HECTD1       | -0.54464 | 7.696691 | -3.10946 | 0.002151 | 0.008451 | -2.38407 |
| CXorf56      | 0.558926 | 2.623236 | 3.109241 | 0.002153 | 0.008454 | -1.8489  |
| ATPAF2       | -0.46173 | 3.553313 | -3.1089  | 0.002155 | 0.008461 | -2.18232 |
| CHI3L1       | 3.228061 | 4.510665 | 3.10841  | 0.002159 | 0.008472 | -1.77813 |
| ATP7A        | -0.5657  | 4.90084  | -3.10783 | 0.002163 | 0.008486 | -2.36714 |
| RNASE1       | -1.41053 | 5.900312 | -3.10758 | 0.002164 | 0.00849  | -2.41136 |
| PABPC1L      | 1.236271 | 4.047569 | 3.107233 | 0.002167 | 0.008497 | -1.98303 |
| GREB1        | -1.23692 | 1.585698 | -3.10625 | 0.002174 | 0.008522 | -1.94149 |
| THBS1        | -1.32791 | 8.310178 | -3.10586 | 0.002177 | 0.00853  | -2.35219 |
| C17orf42     | 0.523105 | 3.268824 | 3.105394 | 0.00218  | 0.008538 | -1.96701 |
| RAPGEF5      | 0.72216  | 5.508073 | 3.105417 | 0.00218  | 0.008538 | -2.32254 |
| SRPR         | -0.61928 | 7.681604 | -3.1044  | 0.002187 | 0.008563 | -2.39739 |
| C19orf47     | 0.466583 | 4.19594  | 3.103914 | 0.00219  | 0.008574 | -2.16246 |
| PCDHB4       | -1.15849 | 1.035514 | -3.10346 | 0.002193 | 0.008584 | -1.85655 |
| TNFSF9       | 2.416053 | 1.935313 | 3.102912 | 0.002197 | 0.008592 | -1.61148 |
| DNAJC7       | 0.452535 | 5.901554 | 3.102956 | 0.002197 | 0.008592 | -2.38892 |
| STAT2        | 0.591684 | 6.605958 | 3.102996 | 0.002197 | 0.008592 | -2.42022 |
| PREPL        | -0.49629 | 6.161503 | -3.10251 | 0.0022   | 0.008601 | -2.43262 |
| C5orf39      | 1.277899 | 1.034473 | 3.101656 | 0.002206 | 0.008622 | -1.62386 |
| WSB2         | -0.47076 | 6.477457 | -3.10062 | 0.002214 | 0.008649 | -2.43734 |
| PRPF3        | 0.443332 | 5.098494 | 3.100048 | 0.002218 | 0.008662 | -2.32026 |
| MAP6D1       | 1.00985  | 1.6695   | 3.098845 | 0.002226 | 0.008693 | -1.71148 |
| FBXW5        | -0.51528 | 6.837241 | -3.09854 | 0.002228 | 0.008699 | -2.43747 |
| PCF11        | -0.48066 | 5.49629  | -3.09842 | 0.002229 | 0.0087   | -2.42786 |
| NSDHL        | 0.711872 | 4.751345 | 3.098279 | 0.00223  | 0.008702 | -2.2415  |
| TSEN54       | 0.657991 | 4.498898 | 3.098182 | 0.002231 | 0.008702 | -2.20212 |
| RSBN1        | -0.44745 | 4.86174  | -3.09792 | 0.002233 | 0.008707 | -2.38428 |
| ICAM1        | 1.339945 | 6.033127 | 3.097241 | 0.002238 | 0.008724 | -2.34194 |
| GNPTG        | -0.49114 | 4.88217  | -3.09604 | 0.002246 | 0.008755 | -2.39475 |
| ACTR5        | 0.593335 | 3.644977 | 3.094864 | 0.002255 | 0.008786 | -2.05665 |
| GABRA3       | 3.343314 | -0.1281  | 3.094559 | 0.002257 | 0.008788 | -1.61094 |
| LAS1L        | 0.507032 | 5.2788   | 3.094679 | 0.002256 | 0.008788 | -2.35038 |
| SPG21        | 0.381712 | 6.236624 | 3.094513 | 0.002257 | 0.008788 | -2.4381  |
| C4orf43      | 0.584028 | 3.840602 | 3.093749 | 0.002263 | 0.008807 | -2.10035 |
| TGIF1        | 0.652251 | 6.183805 | 3.093432 | 0.002265 | 0.008814 | -2.42399 |
| XRCC3        | 0.666259 | 4.697708 | 3.092621 | 0.002271 | 0.008834 | -2.2545  |
| PRR5-ARHGAP8 | 1.439079 | 1.11975  | 3.092239 | 0.002274 | 0.00884  | -1.64459 |
| SLC43A1      | -1.43316 | 3.235306 | -3.09229 | 0.002274 | 0.00884  | -2.30806 |
| RALGAPA1     | -0.56186 | 4.962562 | -3.09162 | 0.002279 | 0.008855 | -2.41948 |

|            |       |          |          |          |          |          |          |
|------------|-------|----------|----------|----------|----------|----------|----------|
| NCF2       |       | 1.849334 | 3.145345 | 3.091434 | 0.00228  | 0.008858 | -1.81613 |
| LOC653501  |       | -0.84755 | 2.061263 | -3.09127 | 0.002281 | 0.008858 | -2.01146 |
| ING5       |       | -0.50192 | 4.372518 | -3.09126 | 0.002281 | 0.008858 | -2.35928 |
| FAM73A     |       | -0.57081 | 4.480025 | -3.09073 | 0.002285 | 0.008871 | -2.3787  |
| HSPA14     |       | 0.533569 | 4.907179 | 3.090086 | 0.00229  | 0.008887 | -2.31505 |
| UCKL1      |       | 0.45159  | 5.243299 | 3.089634 | 0.002293 | 0.008895 | -2.36666 |
| PDCD6      |       | 0.652115 | 6.116519 | 3.089616 | 0.002293 | 0.008895 | -2.43059 |
| NMU        |       | 2.675719 | 2.051852 | 3.088706 | 0.0023   | 0.008919 | -1.64089 |
| FKBP1B     |       | -0.9714  | 2.217858 | -3.08732 | 0.00231  | 0.008956 | -2.06779 |
| CDH1       |       | 1.386597 | 8.71523  | 3.087068 | 0.002312 | 0.008961 | -2.46678 |
| DBI        |       | 0.719795 | 6.408291 | 3.085962 | 0.00232  | 0.00899  | -2.45611 |
| NCRNA00176 |       | 1.504275 | 0.310107 | 3.085482 | 0.002324 | 0.009002 | -1.63732 |
| YTHDC2     |       | -0.44445 | 5.376951 | -3.08495 | 0.002328 | 0.009014 | -2.4599  |
| ADAMTS12   |       | 3.058739 | 2.743846 | 3.084819 | 0.002329 | 0.009016 | -1.67882 |
| CCDC123    |       | 0.555893 | 4.158853 | 3.084548 | 0.002331 | 0.009021 | -2.19596 |
| PPP1R15B   |       | -0.47892 | 6.967814 | -3.08417 | 0.002334 | 0.009029 | -2.47793 |
| GBP1       |       | 1.400803 | 5.669245 | 3.083629 | 0.002338 | 0.009043 | -2.32944 |
| RAB26      |       | -1.32621 | 0.193444 | -3.08317 | 0.002341 | 0.009053 | -1.819   |
| ZNF595     |       | -1.20961 | 2.190196 | -3.08273 | 0.002344 | 0.009064 | -2.12113 |
| RAMP3      |       | -0.92996 | 2.437642 | -3.08243 | 0.002347 | 0.00907  | -2.12122 |
| SRD5A1     |       | 1.313445 | 4.664674 | 3.082237 | 0.002348 | 0.009073 | -2.16503 |
| NDUFAF1    |       | -0.46315 | 3.026494 | -3.08117 | 0.002356 | 0.009102 | -2.1592  |
| AMIGO3     |       | -0.70021 | 2.577197 | -3.08098 | 0.002358 | 0.009103 | -2.11054 |
| KIAA0467   |       | -0.48984 | 6.253702 | -3.08095 | 0.002358 | 0.009103 | -2.49635 |
| IGF2BP3    |       | 5.139622 | 4.052599 | 3.080862 | 0.002358 | 0.009103 | -1.65778 |
| GPR115     |       | 3.8214   | 2.192309 | 3.079741 | 0.002367 | 0.009128 | -1.6582  |
| ZNF274     |       | -0.69904 | 3.98548  | -3.07988 | 0.002366 | 0.009128 | -2.36719 |
| ITPKB      |       | -0.86656 | 5.642415 | -3.07975 | 0.002367 | 0.009128 | -2.49681 |
| YY1        |       | 0.352035 | 6.523634 | 3.07925  | 0.002371 | 0.00914  | -2.49464 |
|            | 8-Mar | -0.63732 | 3.879379 | -3.07914 | 0.002372 | 0.009141 | -2.34878 |
| EVI5L      |       | -0.64251 | 4.535345 | -3.07906 | 0.002372 | 0.009141 | -2.425   |
| C9orf93    |       | -0.80112 | 1.094262 | -3.07867 | 0.002375 | 0.00915  | -1.89226 |
| LIAS       |       | -0.51834 | 2.548747 | -3.07821 | 0.002379 | 0.00916  | -2.08427 |
| GJB4       |       | 3.476305 | 2.182166 | 3.078019 | 0.00238  | 0.009163 | -1.66294 |
| TNFRSF10A  |       | 1.050054 | 3.299334 | 3.077767 | 0.002382 | 0.009168 | -1.97319 |
| WDR11      |       | -0.41235 | 5.765345 | -3.07743 | 0.002385 | 0.009176 | -2.49766 |
| RELB       |       | 0.783218 | 4.838788 | 3.077215 | 0.002386 | 0.009179 | -2.30599 |
| MECOM      |       | -1.65796 | 5.4684   | -3.07668 | 0.00239  | 0.009193 | -2.50377 |
| DDX55      |       | 0.509481 | 4.475219 | 3.076552 | 0.002391 | 0.009193 | -2.28728 |
| MLLT6      |       | -0.63737 | 7.581691 | -3.07649 | 0.002392 | 0.009193 | -2.48207 |
| CEP78      |       | 0.631147 | 4.132369 | 3.076021 | 0.002395 | 0.009204 | -2.20155 |
| MEF2A      |       | -0.58687 | 6.396799 | -3.07516 | 0.002402 | 0.009227 | -2.51183 |
| RICH2      |       | -1.25582 | 2.688404 | -3.07471 | 0.002405 | 0.009238 | -2.24638 |
| CLYBL      |       | -0.93923 | 1.51997  | -3.07463 | 0.002406 | 0.009238 | -1.98088 |
| FAM108C1   |       | 1.031257 | 6.222254 | 3.074299 | 0.002409 | 0.009245 | -2.45537 |
| KIF26B     |       | 1.954308 | 4.094025 | 3.07372  | 0.002413 | 0.009257 | -1.97951 |
| RAD51L3    |       | 0.674292 | 2.970583 | 3.073726 | 0.002413 | 0.009257 | -1.98715 |
| RAD17      |       | -0.34053 | 4.549167 | -3.07346 | 0.002415 | 0.009262 | -2.41528 |
| SRRM2      |       | -0.40233 | 10.13107 | -3.07331 | 0.002416 | 0.009264 | -2.41538 |
| TUBG1      |       | 0.621235 | 5.756008 | 3.073049 | 0.002418 | 0.009269 | -2.45187 |
| HPDL       |       | 2.288058 | 2.542404 | 3.072653 | 0.002421 | 0.009279 | -1.75601 |
| METTL14    |       | -0.38245 | 3.460521 | -3.07176 | 0.002428 | 0.009303 | -2.26053 |
| CD99L2     |       | -0.69625 | 4.963306 | -3.07157 | 0.00243  | 0.009306 | -2.4871  |
| THTPA      |       | -0.51525 | 3.018344 | -3.07002 | 0.002442 | 0.009349 | -2.19958 |
| C16orf80   |       | 0.552281 | 4.470627 | 3.069349 | 0.002447 | 0.009362 | -2.3008  |
| AIF1L      |       | -1.27824 | 3.693902 | -3.06943 | 0.002446 | 0.009362 | -2.42088 |
| IL1R1      |       | -0.98267 | 6.181244 | -3.0694  | 0.002447 | 0.009362 | -2.52628 |
| GDE1       |       | -0.47572 | 6.56942  | -3.0691  | 0.002449 | 0.009367 | -2.52885 |

|          |          |          |          |          |          |          |
|----------|----------|----------|----------|----------|----------|----------|
| UCK1     | -0.45925 | 4.141482 | -3.06895 | 0.00245  | 0.009369 | -2.39276 |
| PRRG4    | 1.411199 | 4.666206 | 3.068769 | 0.002451 | 0.009371 | -2.18719 |
| FCHO1    | 2.388295 | 2.605727 | 3.068628 | 0.002453 | 0.009373 | -1.7649  |
| KYNU     | 3.16881  | 3.416083 | 3.068122 | 0.002457 | 0.009375 | -1.77607 |
| IFI35    | 1.10437  | 4.258792 | 3.068171 | 0.002456 | 0.009375 | -2.16171 |
| MYBBP1A  | 0.621814 | 6.328395 | 3.068352 | 0.002455 | 0.009375 | -2.5083  |
| KLHL9    | -0.75499 | 5.278938 | -3.06817 | 0.002456 | 0.009375 | -2.51714 |
| APBB2    | -0.69673 | 5.625618 | -3.06817 | 0.002456 | 0.009375 | -2.52753 |
| CDK5RAP1 | 0.465997 | 4.394775 | 3.068027 | 0.002457 | 0.009376 | -2.30501 |
| C17orf96 | 1.422245 | 3.375656 | 3.066911 | 0.002466 | 0.009404 | -1.96899 |
| TUG1     | 0.39592  | 8.094876 | 3.066939 | 0.002466 | 0.009404 | -2.52091 |
| CXCL1    | 4.286729 | 4.931121 | 3.066424 | 0.00247  | 0.009415 | -1.82894 |
| PPP1R12A | -0.54097 | 6.549478 | -3.06638 | 0.00247  | 0.009415 | -2.53622 |
| PLEKHG4  | 1.554725 | 4.715414 | 3.066133 | 0.002472 | 0.00942  | -2.17579 |
| PVRL4    | 2.422834 | 5.155634 | 3.065519 | 0.002477 | 0.009433 | -2.10759 |
| CNOT2    | 0.458836 | 6.076794 | 3.065539 | 0.002477 | 0.009433 | -2.5105  |
| P4HA3    | 1.648083 | 0.714247 | 3.06534  | 0.002478 | 0.009434 | -1.69455 |
| RAB3A    | -0.7913  | 1.193372 | -3.06533 | 0.002479 | 0.009434 | -1.94331 |
| CCDC103  | 1.104341 | 0.709256 | 3.063881 | 0.00249  | 0.009475 | -1.71654 |
| MET      | 1.009264 | 7.134048 | 3.063767 | 0.002491 | 0.009475 | -2.53927 |
| TMEM223  | 0.679616 | 3.642159 | 3.063201 | 0.002495 | 0.00949  | -2.13162 |
| ITFG2    | -0.49903 | 4.014066 | -3.06244 | 0.002501 | 0.00951  | -2.3988  |
| KCTD3    | -0.56723 | 6.285236 | -3.06236 | 0.002502 | 0.00951  | -2.55037 |
| ZNF488   | 2.204433 | 2.139    | 3.061868 | 0.002506 | 0.009522 | -1.75716 |
| UNC93B1  | 0.856332 | 5.866018 | 3.061792 | 0.002507 | 0.009522 | -2.47424 |
| PPM1M    | -0.59111 | 3.272112 | -3.06057 | 0.002516 | 0.009557 | -2.29353 |
| PITPNM3  | -1.30393 | 4.674675 | -3.05979 | 0.002523 | 0.009578 | -2.53372 |
| ZNF2     | -0.39789 | 2.378591 | -3.05927 | 0.002527 | 0.009589 | -2.08817 |
| SFPQ     | 0.331352 | 7.876436 | 3.059313 | 0.002527 | 0.009589 | -2.54682 |
| POMP     | 0.578238 | 6.48602  | 3.05898  | 0.002529 | 0.009595 | -2.54531 |
| AP3M2    | 0.784823 | 4.443606 | 3.058536 | 0.002533 | 0.009603 | -2.2852  |
| NVL      | 0.413754 | 4.480331 | 3.058455 | 0.002533 | 0.009603 | -2.35763 |
| KIAA0182 | -0.6123  | 6.510224 | -3.0585  | 0.002533 | 0.009603 | -2.55876 |
| TGFB1    | 1.565703 | 7.490007 | 3.05826  | 0.002535 | 0.009607 | -2.54943 |
| ORMDL2   | 0.645322 | 4.706857 | 3.057569 | 0.002541 | 0.009625 | -2.36283 |
| PDE12    | -0.51236 | 5.244115 | -3.05691 | 0.002546 | 0.009643 | -2.53754 |
| XPO6     | 0.407988 | 7.111229 | 3.056547 | 0.002549 | 0.009651 | -2.56761 |
| CNOT3    | 0.392734 | 6.20838  | 3.056425 | 0.00255  | 0.009652 | -2.54786 |
| VPS72    | 0.45512  | 5.336198 | 3.055512 | 0.002557 | 0.009678 | -2.47624 |
| CD83     | 1.276279 | 3.201955 | 3.055217 | 0.00256  | 0.009684 | -1.99687 |
| PALLD    | -1.12242 | 7.900352 | -3.05486 | 0.002563 | 0.009693 | -2.52094 |
| PKD2     | -0.69538 | 4.837131 | -3.05451 | 0.002565 | 0.009698 | -2.5278  |
| SMG6     | -0.42024 | 5.807496 | -3.05454 | 0.002565 | 0.009698 | -2.5661  |
| VAMP4    | -0.47786 | 4.348399 | -3.05432 | 0.002567 | 0.009701 | -2.46213 |
| ODF2L    | 1.123562 | 4.054826 | 3.052344 | 0.002583 | 0.00976  | -2.16625 |
| SLC8A1   | -0.95489 | 3.005705 | -3.05217 | 0.002585 | 0.009763 | -2.32846 |
| ZNF788   | -1.14356 | 0.659598 | -3.052   | 0.002586 | 0.009764 | -1.95273 |
| DSG2     | 1.004839 | 8.257773 | 3.051959 | 0.002586 | 0.009764 | -2.57218 |
| GPR137B  | 0.784418 | 4.434569 | 3.051873 | 0.002587 | 0.009764 | -2.30406 |
| ABHD11   | 1.156684 | 4.838311 | 3.051555 | 0.00259  | 0.009771 | -2.3159  |
| LPGAT1   | 0.62522  | 6.539569 | 3.05115  | 0.002593 | 0.009781 | -2.56844 |
| EPC1     | -0.46815 | 4.152839 | -3.05089 | 0.002595 | 0.009787 | -2.44764 |
| C1orf31  | 0.995135 | 4.055582 | 3.049634 | 0.002606 | 0.009821 | -2.19614 |
| ALKBH7   | -0.5929  | 4.535894 | -3.04965 | 0.002605 | 0.009821 | -2.5063  |
| GIT1     | 0.576061 | 6.775056 | 3.048691 | 0.002613 | 0.009847 | -2.58485 |
| RUFY2    | -0.42509 | 3.853555 | -3.04817 | 0.002618 | 0.00986  | -2.40765 |
| C5orf25  | -0.84227 | 4.159288 | -3.04811 | 0.002618 | 0.00986  | -2.49375 |
| ANO8     | -0.70406 | 3.821489 | -3.04709 | 0.002627 | 0.009889 | -2.44156 |

|            |          |          |          |          |          |          |
|------------|----------|----------|----------|----------|----------|----------|
| LOC729375  | 0.998054 | 0.808614 | 3.046818 | 0.002629 | 0.009895 | -1.78016 |
| ARFIP2     | -0.55284 | 5.477768 | -3.04585 | 0.002637 | 0.009923 | -2.58333 |
| AMN1       | -0.6943  | 2.693804 | -3.04512 | 0.002643 | 0.009944 | -2.23688 |
| RCOR2      | 1.875093 | 1.750125 | 3.044743 | 0.002646 | 0.009949 | -1.79701 |
| TRIM65     | 0.544967 | 4.536597 | 3.044754 | 0.002646 | 0.009949 | -2.38567 |
| DLD        | -0.53191 | 6.386048 | -3.04469 | 0.002647 | 0.009949 | -2.60137 |
| FBLN2      | -1.52366 | 5.330714 | -3.0446  | 0.002648 | 0.009949 | -2.59914 |
| DOCK8      | -1.01512 | 4.392147 | -3.04426 | 0.00265  | 0.009957 | -2.54312 |
| TMEM8A     | -0.65663 | 6.383035 | -3.04209 | 0.002669 | 0.010023 | -2.60762 |
| ITIH4      | -1.26981 | 0.590042 | -3.04136 | 0.002675 | 0.010044 | -1.98556 |
| FAM125B    | -0.87757 | 3.712581 | -3.04076 | 0.00268  | 0.010061 | -2.46545 |
| ZC3H10     | -0.43919 | 2.18745  | -3.0406  | 0.002681 | 0.010063 | -2.11557 |
| NDN        | -1.14213 | 3.420659 | -3.04044 | 0.002683 | 0.010065 | -2.45874 |
| PVRL3      | -1.39868 | 2.558961 | -3.04009 | 0.002686 | 0.010074 | -2.34306 |
| POLD3      | 0.806837 | 4.926865 | 3.039774 | 0.002688 | 0.010081 | -2.42609 |
| MAL2       | 1.223943 | 8.288796 | 3.038765 | 0.002697 | 0.010111 | -2.61333 |
| EPHB2      | 2.839059 | 4.994109 | 3.038233 | 0.002702 | 0.010122 | -2.09388 |
| NBEAL1     | -0.85692 | 4.17034  | -3.0383  | 0.002701 | 0.010122 | -2.52383 |
| PLCB3      | 0.772861 | 6.481656 | 3.037702 | 0.002706 | 0.010137 | -2.59821 |
| NGDN       | 0.539371 | 4.140404 | 3.037409 | 0.002709 | 0.010143 | -2.3319  |
| FIBCD1     | 2.89712  | 0.330836 | 3.036601 | 0.002716 | 0.010166 | -1.77301 |
| DNASE1     | -0.96221 | 2.527456 | -3.03618 | 0.002719 | 0.010174 | -2.27401 |
| TCEAL4     | -0.73671 | 5.157489 | -3.03619 | 0.002719 | 0.010174 | -2.60395 |
| SCO2       | 0.928039 | 4.404691 | 3.036039 | 0.00272  | 0.010176 | -2.31729 |
| EIF4EBP1   | 1.02552  | 5.995803 | 3.035768 | 0.002723 | 0.010181 | -2.54712 |
| YIPF5      | -0.41159 | 5.402887 | -3.03573 | 0.002723 | 0.010181 | -2.60329 |
| KDM4B      | -0.50265 | 5.619065 | -3.03562 | 0.002724 | 0.010182 | -2.61715 |
| HKR1       | -0.62202 | 4.380778 | -3.0348  | 0.002731 | 0.010205 | -2.53652 |
| ZBTB2      | 0.40492  | 4.66817  | 3.034509 | 0.002734 | 0.010212 | -2.45933 |
| SNHG3-RCC1 | 0.890449 | 3.732666 | 3.03428  | 0.002736 | 0.010214 | -2.19763 |
| TTC17      | -0.42292 | 5.948103 | -3.03433 | 0.002735 | 0.010214 | -2.62831 |
| AS3MT      | -1.32483 | 1.353462 | -3.03406 | 0.002737 | 0.010218 | -2.12658 |
| RHBDD3     | 0.59622  | 3.810774 | 3.033662 | 0.002741 | 0.010229 | -2.26493 |
| TMEM204    | -0.77459 | 2.874197 | -3.0326  | 0.00275  | 0.010257 | -2.32599 |
| TMEM120B   | -0.47521 | 4.537849 | -3.03255 | 0.002751 | 0.010257 | -2.54532 |
| MAP1A      | -1.07229 | 4.176648 | -3.03253 | 0.002751 | 0.010257 | -2.56203 |
| TMEM150C   | -0.91727 | 1.543253 | -3.03123 | 0.002762 | 0.010297 | -2.1063  |
| MAP1B      | -1.36668 | 5.996015 | -3.03002 | 0.002773 | 0.010333 | -2.63749 |
| FOXN2      | 0.66883  | 5.395187 | 3.029766 | 0.002775 | 0.010339 | -2.53576 |
| NACC1      | 0.427201 | 7.085788 | 3.028928 | 0.002782 | 0.010364 | -2.64777 |
| GDAP2      | -0.45569 | 4.809887 | -3.02875 | 0.002784 | 0.010367 | -2.58184 |
| CTTNBP2    | -1.5026  | 1.683047 | -3.02857 | 0.002785 | 0.010368 | -2.23232 |
| RBBP8      | 0.853454 | 5.608787 | 3.028539 | 0.002786 | 0.010368 | -2.54473 |
| ZNF75D     | -0.55203 | 3.899061 | -3.02839 | 0.002787 | 0.01037  | -2.48774 |
| ATAD3A     | 0.731894 | 4.77122  | 3.027735 | 0.002793 | 0.010383 | -2.44694 |
| DDX3X      | -0.43652 | 8.34757  | -3.02776 | 0.002793 | 0.010383 | -2.60494 |
| MTA2       | 0.433181 | 6.760461 | 3.027829 | 0.002792 | 0.010383 | -2.64793 |
| HPCAL1     | -0.70123 | 5.370217 | -3.02658 | 0.002803 | 0.010419 | -2.63982 |
| SMS        | 0.702695 | 5.553695 | 3.026433 | 0.002804 | 0.010421 | -2.55977 |
| FADD       | 1.276213 | 5.465941 | 3.025785 | 0.00281  | 0.010436 | -2.48385 |
| TMEM131    | -0.38756 | 7.072574 | -3.02578 | 0.00281  | 0.010436 | -2.64752 |
| MPHOSPH9   | 0.70462  | 4.170439 | 3.025647 | 0.002811 | 0.010438 | -2.34034 |
| SLC2A6     | 1.40054  | 2.399207 | 3.025108 | 0.002816 | 0.010453 | -1.96144 |
| LRPAP1     | -0.53952 | 6.051231 | -3.02475 | 0.002819 | 0.010462 | -2.65907 |
| C10orf125  | 1.253102 | 1.989705 | 3.024603 | 0.002821 | 0.010463 | -1.92998 |
| TM9SF3     | -0.62074 | 8.254312 | -3.02456 | 0.002821 | 0.010463 | -2.61171 |
| ANK3       | -0.75151 | 5.369558 | -3.02336 | 0.002832 | 0.0105   | -2.65097 |
| S100A6     | 1.005622 | 8.75861  | 3.023182 | 0.002833 | 0.010503 | -2.64456 |

|           |          |          |          |          |          |          |
|-----------|----------|----------|----------|----------|----------|----------|
| NR2C2     | -0.46891 | 6.03804  | -3.02279 | 0.002837 | 0.010513 | -2.66392 |
| CADM1     | -1.25797 | 3.037521 | -3.02066 | 0.002856 | 0.010581 | -2.47182 |
| TXN       | 0.882212 | 7.636484 | 3.019925 | 0.002862 | 0.010603 | -2.67275 |
| SHMT2     | 0.680845 | 6.578161 | 3.019247 | 0.002869 | 0.010623 | -2.66018 |
| MGC21881  | -0.70294 | 2.116964 | -3.01862 | 0.002874 | 0.010639 | -2.2078  |
| HAUS5     | 0.707371 | 4.230566 | 3.018604 | 0.002874 | 0.010639 | -2.37316 |
| POLA1     | 0.658636 | 4.908836 | 3.018226 | 0.002878 | 0.010649 | -2.50777 |
| MUL1      | -0.39694 | 4.963316 | -3.01735 | 0.002886 | 0.010675 | -2.62384 |
| ZNF79     | -0.38687 | 2.39782  | -3.0169  | 0.00289  | 0.010688 | -2.2112  |
| HDAC2     | 0.476046 | 6.773535 | 3.016203 | 0.002896 | 0.010708 | -2.6809  |
| AMACR     | -0.92049 | 4.539193 | -3.01484 | 0.002909 | 0.010751 | -2.63304 |
| SLC25A38  | -0.48798 | 4.50163  | -3.01459 | 0.002911 | 0.010757 | -2.59467 |
| CYP2E1    | -1.72132 | 0.820677 | -3.0136  | 0.00292  | 0.010788 | -2.15196 |
| CISD2     | 0.446975 | 4.714724 | 3.013505 | 0.002921 | 0.010788 | -2.52034 |
| LOC220930 | 1.145613 | 2.132574 | 3.013272 | 0.002923 | 0.010791 | -1.99012 |
| IDUA      | -0.78578 | 3.553301 | -3.01334 | 0.002922 | 0.010791 | -2.50846 |
| FAM184A   | -1.58267 | 0.245297 | -3.013   | 0.002926 | 0.010797 | -2.05938 |
| FBXO25    | -0.55613 | 4.129747 | -3.01253 | 0.00293  | 0.01081  | -2.56427 |
| C1orf172  | 1.151332 | 4.382119 | 3.012145 | 0.002934 | 0.01082  | -2.33306 |
| RAB11FIP3 | -0.60159 | 4.995887 | -3.01191 | 0.002936 | 0.010826 | -2.65665 |
| COL4A1    | 0.988635 | 8.775216 | 3.010923 | 0.002945 | 0.010856 | -2.6791  |
| CNTN1     | -2.28315 | 1.443078 | -3.01067 | 0.002947 | 0.010862 | -2.36674 |
| APH1A     | 0.393726 | 6.823747 | 3.010495 | 0.002949 | 0.010865 | -2.69946 |
| TDRD5     | 3.138586 | 0.835447 | 3.009776 | 0.002955 | 0.010887 | -1.84799 |
| MRPL12    | 0.653928 | 5.496335 | 3.00947  | 0.002958 | 0.010894 | -2.607   |
| CRTC2     | 0.372884 | 5.515619 | 3.008455 | 0.002968 | 0.010926 | -2.63735 |
| BRWD1     | -0.49638 | 6.13228  | -3.00839 | 0.002968 | 0.010926 | -2.70659 |
| UBE3B     | -0.37432 | 5.913482 | -3.00766 | 0.002975 | 0.010948 | -2.70339 |
| GMNN      | 0.889323 | 4.125011 | 3.007579 | 0.002976 | 0.010948 | -2.34754 |
| ENTPD5    | -0.65727 | 3.511464 | -3.00695 | 0.002982 | 0.010967 | -2.50038 |
| SERPINI1  | -0.92584 | 1.718214 | -3.00666 | 0.002985 | 0.010974 | -2.20243 |
| ARL11     | 1.669069 | 0.791028 | 3.005638 | 0.002994 | 0.011006 | -1.85892 |
| CHKB      | -0.54674 | 2.63884  | -3.00544 | 0.002996 | 0.01101  | -2.31553 |
| GOLGA2    | -0.4236  | 6.311257 | -3.00516 | 0.002999 | 0.011017 | -2.71636 |
| RAD54L2   | -0.47632 | 4.240555 | -3.00469 | 0.003003 | 0.011028 | -2.59228 |
| LGTN      | -0.46146 | 4.893427 | -3.00467 | 0.003003 | 0.011028 | -2.65907 |
| CILP2     | 2.207209 | 0.840222 | 3.004443 | 0.003005 | 0.01103  | -1.8624  |
| PDCD2L    | 0.804755 | 2.971487 | 3.004496 | 0.003005 | 0.01103  | -2.16691 |
| RAP2B     | 0.829974 | 6.191345 | 3.004352 | 0.003006 | 0.01103  | -2.67154 |
| C2CD4B    | -1.66837 | 1.645823 | -3.00397 | 0.00301  | 0.011038 | -2.31432 |
| PCYOX1    | -0.5142  | 6.851287 | -3.00398 | 0.00301  | 0.011038 | -2.71231 |
| EID1      | -0.54464 | 6.362924 | -3.00318 | 0.003017 | 0.011062 | -2.72124 |
| MBNL2     | -0.69872 | 6.833791 | -3.00219 | 0.003027 | 0.011094 | -2.71454 |
| EMG1      | 0.676648 | 4.556419 | 3.001178 | 0.003036 | 0.011126 | -2.49212 |
| CSNK1E    | 0.464093 | 6.665259 | 3.000092 | 0.003047 | 0.011161 | -2.72502 |
| C1orf115  | -1.02565 | 3.918312 | -2.99955 | 0.003052 | 0.011177 | -2.6226  |
| IFI27L2   | 1.220148 | 3.755365 | 2.998886 | 0.003058 | 0.011198 | -2.24937 |
| MST4      | 0.722751 | 5.410498 | 2.998467 | 0.003062 | 0.01121  | -2.62235 |
| STK31     | 2.734694 | 1.310997 | 2.998214 | 0.003065 | 0.011216 | -1.8807  |
| ZNF154    | -0.89224 | 1.345837 | -2.99735 | 0.003073 | 0.011243 | -2.17053 |
| TBX19     | 0.761505 | 1.816595 | 2.997047 | 0.003076 | 0.011251 | -2.03871 |
| AK3L1     | -1.06141 | 4.335851 | -2.99693 | 0.003077 | 0.011252 | -2.6772  |
| HAUS1     | 0.820395 | 3.084068 | 2.996811 | 0.003078 | 0.011253 | -2.20436 |
| TLL1      | -1.50913 | 0.707131 | -2.99524 | 0.003093 | 0.011306 | -2.15999 |
| M6PR      | 0.425446 | 6.782282 | 2.995051 | 0.003095 | 0.01131  | -2.74262 |
| PA2G4P4   | 0.68782  | 3.554315 | 2.994614 | 0.0031   | 0.011322 | -2.31196 |
| RRP12     | 0.535359 | 5.800351 | 2.994278 | 0.003103 | 0.011331 | -2.69038 |
| ZNF585A   | -0.91336 | 1.992063 | -2.99317 | 0.003114 | 0.011368 | -2.29001 |

|           |          |          |          |          |          |          |
|-----------|----------|----------|----------|----------|----------|----------|
| HAP1      | 3.16299  | 0.9013   | 2.992436 | 0.003121 | 0.011391 | -1.89537 |
| C1orf113  | 1.638384 | 2.971307 | 2.99232  | 0.003122 | 0.011392 | -2.09769 |
| CLN5      | -0.51139 | 4.509721 | -2.99213 | 0.003124 | 0.011396 | -2.66176 |
| CPNE2     | 0.904388 | 5.099179 | 2.991987 | 0.003125 | 0.011398 | -2.5787  |
| HAT1      | 0.482581 | 5.647068 | 2.990569 | 0.003139 | 0.011446 | -2.69168 |
| EXD2      | -0.42811 | 4.839035 | -2.99049 | 0.00314  | 0.011446 | -2.69221 |
| EPHA2     | 1.088305 | 7.301131 | 2.990229 | 0.003142 | 0.011452 | -2.75383 |
| C10orf119 | 0.318181 | 6.608919 | 2.989847 | 0.003146 | 0.011463 | -2.75621 |
| ATP2A1    | 1.355957 | 0.169393 | 2.989469 | 0.00315  | 0.01147  | -1.9009  |
| ZMYM6     | -0.37295 | 4.698813 | -2.9895  | 0.00315  | 0.01147  | -2.67667 |
| UBE2J1    | -0.53757 | 6.544735 | -2.9893  | 0.003152 | 0.011473 | -2.75897 |
| RAB3GAP1  | -0.4065  | 6.168633 | -2.9889  | 0.003156 | 0.011485 | -2.76212 |
| SUCLA2    | -0.46982 | 5.238781 | -2.98812 | 0.003163 | 0.01151  | -2.73332 |
| LMBRD2    | -0.63803 | 3.501148 | -2.98774 | 0.003167 | 0.01152  | -2.55047 |
| ATP8B2    | -1.04218 | 4.427154 | -2.98745 | 0.00317  | 0.011528 | -2.7119  |
| C11orf52  | -1.0977  | 1.745117 | -2.98661 | 0.003178 | 0.011555 | -2.28772 |
| MYH3      | -1.05466 | 0.453264 | -2.9861  | 0.003183 | 0.01157  | -2.10027 |
| WDR53     | 0.842855 | 2.74615  | 2.985526 | 0.003189 | 0.011588 | -2.18354 |
| C2orf74   | -1.26918 | 1.635602 | -2.98357 | 0.003209 | 0.011656 | -2.31001 |
| RTN1      | -1.21906 | 1.038459 | -2.98309 | 0.003213 | 0.011666 | -2.20758 |
| PRDM8     | -1.09139 | 1.459335 | -2.9832  | 0.003212 | 0.011666 | -2.25404 |
| CHURC1    | -0.48508 | 5.731185 | -2.98306 | 0.003214 | 0.011666 | -2.77134 |
| ALOX12P2  | 3.22491  | 0.558799 | 2.982282 | 0.003222 | 0.011691 | -1.92191 |
| POLG2     | 0.555158 | 2.475046 | 2.981238 | 0.003232 | 0.011716 | -2.19245 |
| RCSD1     | -0.95284 | 2.567956 | -2.9812  | 0.003232 | 0.011716 | -2.44336 |
| MAP2K5    | -0.42203 | 3.61437  | -2.98146 | 0.00323  | 0.011716 | -2.5559  |
| RNPEPL1   | -0.57221 | 7.173006 | -2.98141 | 0.00323  | 0.011716 | -2.76912 |
| SLC29A1   | -0.87859 | 5.778352 | -2.98136 | 0.003231 | 0.011716 | -2.78307 |
| DIP2B     | 0.691504 | 7.116109 | 2.980494 | 0.00324  | 0.011738 | -2.78517 |
| CDX2      | 4.658245 | 0.873335 | 2.980375 | 0.003241 | 0.01174  | -1.92821 |
| ASCL2     | 3.31557  | 2.45082  | 2.980167 | 0.003243 | 0.011744 | -1.93242 |
| TRABD     | 0.532437 | 5.928128 | 2.980074 | 0.003244 | 0.011745 | -2.74143 |
| SEL1L     | -0.57408 | 7.118787 | -2.97999 | 0.003245 | 0.011745 | -2.77432 |
| ANKRD32   | 0.65018  | 2.980153 | 2.979855 | 0.003246 | 0.011747 | -2.25857 |
| C10orf2   | 0.719175 | 4.099848 | 2.979675 | 0.003248 | 0.011749 | -2.45563 |
| POGK      | 0.401256 | 6.530088 | 2.979633 | 0.003248 | 0.011749 | -2.78136 |
| LPHN1     | -0.83731 | 6.00238  | -2.9795  | 0.00325  | 0.01175  | -2.78889 |
| CHRA1     | 0.560339 | 5.982335 | 2.977795 | 0.003267 | 0.01181  | -2.7503  |
| RWDD2A    | -0.61572 | 1.694555 | -2.97763 | 0.003269 | 0.011813 | -2.23877 |
| ZNF70     | -0.53856 | 3.412356 | -2.97704 | 0.003275 | 0.011832 | -2.5493  |
| CPAMD8    | -1.11473 | 1.548938 | -2.9768  | 0.003277 | 0.011838 | -2.28699 |
| HAUS2     | 0.456986 | 5.012037 | 2.976274 | 0.003282 | 0.011854 | -2.66651 |
| MIOS      | -0.45413 | 5.011767 | -2.97571 | 0.003288 | 0.011872 | -2.75098 |
| F2R       | 1.113448 | 5.75319  | 2.974876 | 0.003297 | 0.0119   | -2.68665 |
| PDAP1     | 0.605931 | 6.256486 | 2.974195 | 0.003304 | 0.011922 | -2.7764  |
| ZMIZ1     | -0.52029 | 7.625072 | -2.97408 | 0.003305 | 0.011923 | -2.77941 |
| YPEL2     | -0.77793 | 4.472394 | -2.97337 | 0.003312 | 0.011946 | -2.73479 |
| MTIF3     | -0.53202 | 4.86743  | -2.9733  | 0.003313 | 0.011946 | -2.75138 |
| ZBTB42    | -0.62606 | 3.490929 | -2.97259 | 0.00332  | 0.011966 | -2.58967 |
| UBR4      | -0.42067 | 8.324159 | -2.9726  | 0.00332  | 0.011966 | -2.7641  |
| MGRN1     | -0.46611 | 6.695362 | -2.97203 | 0.003326 | 0.011984 | -2.80693 |
| SORT1     | -0.97591 | 6.94588  | -2.97183 | 0.003328 | 0.011985 | -2.79305 |
| SLC35E2   | -0.67485 | 6.376279 | -2.97188 | 0.003328 | 0.011985 | -2.80901 |
| NFE2L2    | -0.80013 | 7.97026  | -2.97022 | 0.003345 | 0.012042 | -2.77137 |
| TM9SF4    | 0.365656 | 7.220751 | 2.9699   | 0.003348 | 0.012051 | -2.81589 |
| SIRT1     | -0.48646 | 4.782442 | -2.96964 | 0.003351 | 0.012058 | -2.75107 |
| TOLLIP    | -0.59481 | 6.242463 | -2.96915 | 0.003356 | 0.012073 | -2.81869 |
| CERK      | -0.6452  | 5.75548  | -2.96842 | 0.003364 | 0.012098 | -2.81694 |

|           |          |          |          |          |          |          |
|-----------|----------|----------|----------|----------|----------|----------|
| KCNK15    | -1.59407 | 0.595913 | -2.96791 | 0.003369 | 0.012114 | -2.23009 |
| IGSF10    | -1.65578 | 1.496208 | -2.96705 | 0.003378 | 0.012143 | -2.39112 |
| HIPK1     | -0.57849 | 6.852985 | -2.96661 | 0.003383 | 0.012157 | -2.81774 |
| ATP6V1B1  | 2.234382 | 0.28315  | 2.96604  | 0.003389 | 0.012172 | -1.9647  |
| TNFAIP2   | 1.14471  | 6.846054 | 2.966088 | 0.003388 | 0.012172 | -2.80412 |
| CD68      | 0.837122 | 6.931035 | 2.96547  | 0.003395 | 0.01219  | -2.82114 |
| RCN3      | 1.557469 | 4.228942 | 2.965334 | 0.003396 | 0.012192 | -2.36968 |
| RNF7      | 0.590522 | 5.945364 | 2.96494  | 0.0034   | 0.012204 | -2.7818  |
| SERPINB9  | 1.264882 | 4.881178 | 2.96444  | 0.003406 | 0.012214 | -2.5551  |
| CNIH4     | 0.487254 | 5.293623 | 2.964466 | 0.003405 | 0.012214 | -2.73013 |
| ZNF83     | -1.10021 | 4.11485  | -2.96443 | 0.003406 | 0.012214 | -2.75227 |
| SALL2     | -1.23718 | 1.821377 | -2.96406 | 0.00341  | 0.012225 | -2.39668 |
| SLC39A1   | 0.454883 | 6.767437 | 2.963868 | 0.003412 | 0.012229 | -2.83065 |
| RASA4P    | -0.80096 | 2.263064 | -2.96378 | 0.003413 | 0.01223  | -2.40513 |
| GRAMD1C   | -0.93673 | 2.975957 | -2.96337 | 0.003417 | 0.012242 | -2.56661 |
| TPM4      | 0.531579 | 9.346746 | 2.963085 | 0.00342  | 0.01225  | -2.78518 |
| EGFL6     | 1.724703 | 3.077359 | 2.962708 | 0.003424 | 0.012261 | -2.18332 |
| PCM1      | -0.58578 | 6.824798 | -2.96224 | 0.003429 | 0.012276 | -2.83052 |
| PPP1R3E   | -0.6521  | 1.779286 | -2.95997 | 0.003453 | 0.012359 | -2.30713 |
| WDR54     | 1.152688 | 2.865028 | 2.959861 | 0.003455 | 0.01236  | -2.23202 |
| SLC10A3   | 0.623562 | 5.566762 | 2.959672 | 0.003457 | 0.012364 | -2.75952 |
| LOC728554 | 1.616865 | 3.932743 | 2.959488 | 0.003459 | 0.012368 | -2.32994 |
| ZNF197    | -0.48155 | 3.924596 | -2.95934 | 0.00346  | 0.012371 | -2.6799  |
| FAM38A    | 0.600593 | 7.821735 | 2.959047 | 0.003463 | 0.012379 | -2.84057 |
| LCN2      | 2.826565 | 7.787361 | 2.958455 | 0.00347  | 0.012398 | -2.77612 |
| BRI3BP    | 0.891754 | 3.958572 | 2.957672 | 0.003478 | 0.012425 | -2.45493 |
| C16orf55  | 0.716782 | 3.091996 | 2.957405 | 0.003481 | 0.012433 | -2.32845 |
| STX7      | -0.53382 | 5.829597 | -2.95715 | 0.003484 | 0.012439 | -2.8485  |
| SLC44A1   | 0.576597 | 7.768861 | 2.956234 | 0.003494 | 0.012471 | -2.8491  |
| DCK       | 0.509536 | 5.262363 | 2.956069 | 0.003495 | 0.012474 | -2.74764 |
| CTSO      | -0.85689 | 4.600248 | -2.95592 | 0.003497 | 0.012474 | -2.8021  |
| AK2       | 0.415762 | 6.246287 | 2.955943 | 0.003497 | 0.012474 | -2.83695 |
| DNAH1     | -1.03577 | 3.307438 | -2.95567 | 0.0035   | 0.012481 | -2.66644 |
| ZNF333    | -0.51856 | 2.94871  | -2.95504 | 0.003507 | 0.012502 | -2.51568 |
| KIAA0564  | -0.56068 | 5.443437 | -2.9541  | 0.003517 | 0.012535 | -2.84503 |
| TBC1D10B  | 0.390338 | 6.236478 | 2.953957 | 0.003518 | 0.012537 | -2.84322 |
| PTPRS     | -1.61705 | 5.925899 | -2.9536  | 0.003522 | 0.012548 | -2.85255 |
| TAZ       | 0.529633 | 4.414384 | 2.953092 | 0.003528 | 0.012565 | -2.62605 |
| MPND      | -0.49077 | 3.437016 | -2.95227 | 0.003537 | 0.012594 | -2.61444 |
| ANKRD13C  | -0.35326 | 4.855285 | -2.95195 | 0.00354  | 0.012603 | -2.79689 |
| TBX15     | 1.786378 | 0.132904 | 2.951574 | 0.003545 | 0.012611 | -2.00298 |
| JUN       | -0.84802 | 7.750637 | -2.95159 | 0.003544 | 0.012611 | -2.82993 |
| IFT52     | 0.545243 | 4.329353 | 2.951363 | 0.003547 | 0.012616 | -2.61276 |
| RERG      | -1.07923 | 1.483513 | -2.95011 | 0.003561 | 0.012659 | -2.3499  |
| APBA1     | -0.80158 | 2.94171  | -2.95015 | 0.00356  | 0.012659 | -2.5779  |
| CSTF1     | 0.412783 | 5.141016 | 2.950023 | 0.003562 | 0.012659 | -2.76066 |
| COMMD5    | 0.488304 | 4.150995 | 2.949938 | 0.003563 | 0.012659 | -2.59074 |
| THRA      | -0.90577 | 5.17209  | -2.94926 | 0.00357  | 0.012683 | -2.85917 |
| COL24A1   | 2.069218 | 0.50389  | 2.94856  | 0.003578 | 0.012706 | -2.0123  |
| ZNF767    | -0.52661 | 3.180313 | -2.9485  | 0.003578 | 0.012706 | -2.58155 |
| UBA5      | -0.45742 | 5.153834 | -2.94664 | 0.003599 | 0.012776 | -2.84432 |
| HDAC11    | -0.59551 | 3.818628 | -2.94428 | 0.003626 | 0.012867 | -2.72128 |
| GEMIN6    | 0.602047 | 2.638982 | 2.944123 | 0.003627 | 0.012869 | -2.31286 |
| AKT1      | -0.42721 | 7.423966 | -2.94391 | 0.00363  | 0.012875 | -2.87242 |
| KIAA2026  | -0.48252 | 5.591059 | -2.94323 | 0.003637 | 0.012898 | -2.87919 |
| RPL26L1   | 0.681407 | 2.636791 | 2.943044 | 0.003639 | 0.012902 | -2.3062  |
| BMP8A     | 1.368349 | 3.773667 | 2.942977 | 0.00364  | 0.012902 | -2.38397 |
| PODNL1    | 1.994138 | 2.364862 | 2.942728 | 0.003643 | 0.012908 | -2.12724 |



|          |          |          |          |          |          |          |
|----------|----------|----------|----------|----------|----------|----------|
| TMED7    | -0.42102 | 6.944657 | -2.94265 | 0.003644 | 0.012908 | -2.88637 |
| FAM160B2 | -0.44683 | 5.955794 | -2.94227 | 0.003648 | 0.01292  | -2.89162 |
| CNPY3    | 0.736671 | 5.731619 | 2.94154  | 0.003656 | 0.012946 | -2.81613 |
| PANK4    | -0.36673 | 4.140841 | -2.94128 | 0.003659 | 0.012954 | -2.74779 |
| H3F3B    | 0.501403 | 8.802767 | 2.941163 | 0.003661 | 0.012955 | -2.86418 |
| NDST1    | -0.78129 | 7.120912 | -2.94066 | 0.003666 | 0.012972 | -2.88118 |
| AGAP5    | -0.6289  | 1.673851 | -2.94051 | 0.003668 | 0.012974 | -2.34035 |
| SEMA5B   | 1.790723 | 0.875854 | 2.939593 | 0.003678 | 0.013007 | -2.03737 |
| RNMTL1   | -0.48287 | 3.343469 | -2.93953 | 0.003679 | 0.013007 | -2.6317  |
| MMP9     | 3.261006 | 4.480123 | 2.939447 | 0.00368  | 0.013007 | -2.24617 |
| MRPL54   | -0.50956 | 3.708388 | -2.93876 | 0.003688 | 0.013031 | -2.70621 |
| MRPL11   | 0.585018 | 4.762431 | 2.93865  | 0.003689 | 0.013031 | -2.7209  |
| NUCB1    | -0.43649 | 7.99682  | -2.9386  | 0.00369  | 0.013031 | -2.87051 |
| TUBB3    | 1.567206 | 5.024029 | 2.937417 | 0.003703 | 0.013076 | -2.60653 |
| AGPS     | 0.518688 | 6.18684  | 2.936646 | 0.003712 | 0.013104 | -2.88308 |
| FAM76A   | -0.41575 | 3.192353 | -2.9365  | 0.003714 | 0.013106 | -2.59735 |
| PPAPDC2  | -0.52489 | 3.611248 | -2.93643 | 0.003714 | 0.013106 | -2.69723 |
| HSPA5    | 0.439497 | 9.57895  | 2.935987 | 0.00372  | 0.01312  | -2.85107 |
| ZNF461   | -0.88588 | 1.47683  | -2.93546 | 0.003726 | 0.013138 | -2.3614  |
| GIMAP1   | -0.93014 | 0.709314 | -2.93465 | 0.003735 | 0.013168 | -2.26089 |
| TSPAN14  | 0.580254 | 7.360805 | 2.93449  | 0.003737 | 0.013171 | -2.91612 |
| FAM86C   | 1.033559 | 3.423229 | 2.934354 | 0.003738 | 0.013173 | -2.40219 |
| MGP      | -1.38278 | 5.199911 | -2.93347 | 0.003749 | 0.013206 | -2.91494 |
| HEXIM2   | -0.6074  | 1.256273 | -2.93326 | 0.003751 | 0.013208 | -2.29907 |
| BMS1P5   | -0.78399 | 2.378105 | -2.93331 | 0.00375  | 0.013208 | -2.50474 |
| ZNF217   | 0.512356 | 6.487822 | 2.932809 | 0.003756 | 0.013223 | -2.90866 |
| DUS4L    | 0.657098 | 3.088652 | 2.932668 | 0.003758 | 0.013225 | -2.40606 |
| IGSF6    | 1.381927 | 1.539203 | 2.932046 | 0.003765 | 0.013247 | -2.12844 |
| EEF1A1   | -0.50466 | 11.26637 | -2.93143 | 0.003772 | 0.013269 | -2.77931 |
| DUT      | 0.576067 | 5.336254 | 2.931366 | 0.003773 | 0.013269 | -2.81862 |
| WDFY2    | -0.74259 | 4.224177 | -2.9312  | 0.003775 | 0.013272 | -2.82489 |
| COL28A1  | -1.4858  | 0.962115 | -2.93088 | 0.003779 | 0.013281 | -2.37242 |
| PDCD5    | 0.636423 | 4.828252 | 2.930826 | 0.003779 | 0.013281 | -2.74625 |
| MOBKL1A  | -0.51668 | 5.257301 | -2.92932 | 0.003797 | 0.013339 | -2.90333 |
| ANKRD39  | 0.697703 | 2.815531 | 2.929066 | 0.0038   | 0.013346 | -2.36817 |
| ZMYM1    | 0.504283 | 4.561565 | 2.928024 | 0.003812 | 0.013386 | -2.72819 |
| AP2M1    | 0.605305 | 8.209878 | 2.92724  | 0.003821 | 0.013413 | -2.92218 |
| MAN1A2   | -0.50974 | 5.921354 | -2.92714 | 0.003822 | 0.013413 | -2.93443 |
| HN1L     | 0.546617 | 6.894414 | 2.927122 | 0.003823 | 0.013413 | -2.93479 |
| CA2      | -2.02578 | 5.401348 | -2.92701 | 0.003824 | 0.013414 | -2.92792 |
| CSF1R    | -1.09304 | 4.44714  | -2.92648 | 0.00383  | 0.013433 | -2.88859 |
| CLSTN1   | 0.698182 | 8.661156 | 2.926181 | 0.003834 | 0.013442 | -2.91569 |
| PTCD1    | 0.639556 | 4.768143 | 2.925823 | 0.003838 | 0.013453 | -2.74979 |
| ELF4     | 0.509901 | 6.589986 | 2.925668 | 0.00384  | 0.013456 | -2.93237 |
| PCGF1    | 0.550756 | 3.428351 | 2.924505 | 0.003854 | 0.013501 | -2.50678 |
| HPRT1    | 0.618899 | 5.468895 | 2.924379 | 0.003855 | 0.013503 | -2.84818 |
| COL11A1  | 5.30829  | 2.050643 | 2.92417  | 0.003858 | 0.013505 | -2.08188 |
| FAM175A  | -0.48557 | 2.920215 | -2.92417 | 0.003858 | 0.013505 | -2.59069 |
| NEIL1    | -0.87102 | 1.556679 | -2.92356 | 0.003865 | 0.013523 | -2.40186 |
| ZNF107   | 0.890805 | 4.110426 | 2.923486 | 0.003866 | 0.013523 | -2.58312 |
| RNF43    | 1.494309 | 5.462004 | 2.923515 | 0.003865 | 0.013523 | -2.73457 |
| ZNF516   | -0.74761 | 4.472081 | -2.92229 | 0.00388  | 0.013569 | -2.8765  |
| DHCR7    | 1.149566 | 6.70974  | 2.922013 | 0.003883 | 0.013578 | -2.91978 |
| GJA3     | 3.107439 | 1.452735 | 2.921415 | 0.00389  | 0.013599 | -2.08757 |
| ERBB2IP  | -0.45064 | 6.805261 | -2.92119 | 0.003893 | 0.013605 | -2.94859 |
| SERINC2  | 1.103257 | 7.971995 | 2.920749 | 0.003898 | 0.01362  | -2.95263 |
| CRIP1    | 0.402832 | 4.260958 | 2.920507 | 0.003901 | 0.013627 | -2.71112 |
| PLXNA3   | 0.727744 | 6.226353 | 2.920235 | 0.003905 | 0.013635 | -2.91891 |

|           |          |          |          |          |          |          |
|-----------|----------|----------|----------|----------|----------|----------|
| NKIRAS2   | 0.447471 | 5.90564  | 2.919846 | 0.003909 | 0.013648 | -2.91574 |
| COX4NB    | 0.467846 | 4.686359 | 2.919234 | 0.003917 | 0.01367  | -2.7801  |
| CASZ1     | -0.83102 | 6.346256 | -2.91792 | 0.003932 | 0.013722 | -2.95926 |
| MSH6      | 0.639529 | 6.125144 | 2.916635 | 0.003948 | 0.013773 | -2.92782 |
| SLC27A1   | -0.70264 | 4.698121 | -2.91602 | 0.003955 | 0.013796 | -2.91073 |
| STUB1     | -0.49143 | 5.678579 | -2.91588 | 0.003957 | 0.013798 | -2.95922 |
| PRIC285   | 0.806896 | 7.514226 | 2.915374 | 0.003963 | 0.013816 | -2.96972 |
| RPS6KA4   | 0.668469 | 6.252956 | 2.914859 | 0.00397  | 0.013835 | -2.9396  |
| CD58      | 0.673304 | 4.140207 | 2.914759 | 0.003971 | 0.013835 | -2.65403 |
| POLR3G    | 1.314264 | 2.483648 | 2.914129 | 0.003978 | 0.013855 | -2.28771 |
| TYSND1    | 0.793686 | 4.535228 | 2.914158 | 0.003978 | 0.013855 | -2.71241 |
| VASN      | -0.85269 | 4.210386 | -2.9127  | 0.003996 | 0.013912 | -2.88637 |
| CGGBP1    | -0.41477 | 6.426495 | -2.91263 | 0.003997 | 0.013912 | -2.97777 |
| NPTX2     | -1.30422 | 0.782979 | -2.9119  | 0.004006 | 0.013939 | -2.37871 |
| SOX4      | 0.844174 | 7.225744 | 2.911848 | 0.004006 | 0.013939 | -2.97793 |
| NFKB2     | 0.698395 | 6.2593   | 2.911728 | 0.004008 | 0.01394  | -2.94675 |
| KANK1     | -0.87318 | 5.6858   | -2.91112 | 0.004015 | 0.013963 | -2.97984 |
| CD86      | 1.573529 | 2.594952 | 2.910543 | 0.004022 | 0.013984 | -2.28408 |
| INHBA     | 3.037773 | 4.333653 | 2.909975 | 0.004029 | 0.014005 | -2.33654 |
| XRN2      | 0.426868 | 6.923013 | 2.909831 | 0.004031 | 0.014008 | -2.98501 |
| HOXD11    | 3.711636 | -0.28239 | 2.909288 | 0.004038 | 0.014027 | -2.11443 |
| UBE4A     | -0.50034 | 6.606172 | -2.90897 | 0.004042 | 0.014038 | -2.98514 |
| C3orf34   | 1.457935 | 1.249015 | 2.908642 | 0.004046 | 0.014048 | -2.15827 |
| GTF2E1    | 0.547123 | 3.944088 | 2.908502 | 0.004048 | 0.014051 | -2.65492 |
| CHMP4B    | 0.434712 | 6.611289 | 2.908092 | 0.004053 | 0.014065 | -2.98421 |
| TPRKB     | 0.552535 | 4.09859  | 2.907013 | 0.004066 | 0.014105 | -2.68864 |
| MPP5      | -0.47439 | 5.471779 | -2.90703 | 0.004066 | 0.014105 | -2.97493 |
| ITGAX     | 1.739169 | 3.490096 | 2.906442 | 0.004073 | 0.014126 | -2.39341 |
| PSMD13    | 0.432741 | 6.445467 | 2.906245 | 0.004076 | 0.014131 | -2.98416 |
| TP73      | 3.021122 | 2.693425 | 2.90575  | 0.004082 | 0.014149 | -2.16795 |
| CXCL6     | 3.409526 | 2.364297 | 2.904783 | 0.004094 | 0.014179 | -2.13374 |
| EAf2      | 0.894312 | 1.277628 | 2.90473  | 0.004095 | 0.014179 | -2.21857 |
| OSBP      | -0.39476 | 6.635965 | -2.90491 | 0.004093 | 0.014179 | -2.99744 |
| SIPA1L1   | -0.46374 | 6.534963 | -2.90483 | 0.004093 | 0.014179 | -2.99808 |
| C9orf102  | -0.53719 | 3.365157 | -2.9045  | 0.004098 | 0.014185 | -2.7421  |
| ANKRA2    | -0.39774 | 3.422531 | -2.90439 | 0.004099 | 0.014187 | -2.72974 |
| BBC3      | 1.089863 | 2.901545 | 2.904227 | 0.004101 | 0.014187 | -2.3973  |
| SLC35E1   | -0.37007 | 6.722194 | -2.90422 | 0.004101 | 0.014187 | -2.99846 |
| CDH13     | 1.721916 | 4.872608 | 2.903694 | 0.004108 | 0.014206 | -2.6385  |
| SRM       | 0.611015 | 6.87197  | 2.90339  | 0.004112 | 0.014216 | -2.99943 |
| ATXN7L3   | 0.378268 | 6.32027  | 2.903191 | 0.004114 | 0.014221 | -2.98972 |
| C17orf100 | 0.809427 | 1.556803 | 2.902133 | 0.004127 | 0.014264 | -2.26406 |
| CADM4     | -0.90922 | 3.227161 | -2.902   | 0.004129 | 0.014266 | -2.78832 |
| PABPC1    | 0.588525 | 11.07191 | 2.901886 | 0.004131 | 0.014268 | -2.9017  |
| MTMR7     | -0.77036 | 1.186236 | -2.90156 | 0.004135 | 0.014278 | -2.39656 |
| FLJ35220  | -0.64667 | 2.291131 | -2.90143 | 0.004136 | 0.014281 | -2.55618 |
| EFNA3     | 1.956599 | 3.842488 | 2.901191 | 0.004139 | 0.014287 | -2.42941 |
| NPTXR     | -1.39242 | 3.191796 | -2.90104 | 0.004141 | 0.014291 | -2.84976 |
| FABP6     | 2.36858  | -0.43813 | 2.900564 | 0.004147 | 0.014308 | -2.1366  |
| IER5      | 1.038194 | 5.56206  | 2.898937 | 0.004168 | 0.014375 | -2.88703 |
| TCEB1     | 0.508677 | 4.563387 | 2.898668 | 0.004171 | 0.014384 | -2.81047 |
| PACS2     | -0.44627 | 6.103973 | -2.89852 | 0.004173 | 0.014387 | -3.01621 |
| UCA1      | 3.702512 | 1.1542   | 2.897886 | 0.004181 | 0.014411 | -2.14915 |
| KPNB1     | 0.332948 | 8.168985 | 2.897429 | 0.004187 | 0.014428 | -3.00053 |
| IRF3      | 0.495188 | 5.282395 | 2.897288 | 0.004189 | 0.01443  | -2.91523 |
| XRCC6     | 0.403641 | 8.003454 | 2.89707  | 0.004192 | 0.014436 | -3.00698 |
| COL5A3    | 1.693199 | 5.004396 | 2.896564 | 0.004198 | 0.014455 | -2.69118 |
| KIAA1841  | 0.685906 | 3.739076 | 2.896304 | 0.004202 | 0.014463 | -2.62062 |

|           |          |          |          |          |          |          |
|-----------|----------|----------|----------|----------|----------|----------|
| HECTD2    | -0.68608 | 3.456958 | -2.89608 | 0.004205 | 0.01447  | -2.81046 |
| ZNF596    | -0.78291 | 1.097255 | -2.89577 | 0.004208 | 0.014473 | -2.40133 |
| TAF6L     | 0.515296 | 3.810527 | 2.89575  | 0.004209 | 0.014473 | -2.66756 |
| MRPL18    | 0.547076 | 5.23079  | 2.895805 | 0.004208 | 0.014473 | -2.90863 |
| XDH       | 3.613223 | 3.817382 | 2.894661 | 0.004223 | 0.014518 | -2.25042 |
| SETD2     | -0.42402 | 6.768991 | -2.89346 | 0.004238 | 0.014568 | -3.02681 |
| CYTSA     | -0.51577 | 6.140207 | -2.89336 | 0.00424  | 0.014568 | -3.03128 |
| TTC23     | -0.53685 | 3.896151 | -2.89319 | 0.004242 | 0.014572 | -2.86788 |
| LEF1      | 1.55518  | 3.86795  | 2.892253 | 0.004254 | 0.014611 | -2.51276 |
| OTUD6B    | 0.566226 | 4.144655 | 2.891961 | 0.004258 | 0.014616 | -2.73725 |
| LOC339290 | -0.85404 | 4.36372  | -2.892   | 0.004257 | 0.014616 | -2.95931 |
| RNF115    | -0.38726 | 4.710924 | -2.89166 | 0.004262 | 0.014626 | -2.95452 |
| BCKDK     | -0.45881 | 5.669387 | -2.89041 | 0.004278 | 0.014679 | -3.02873 |
| ZNF502    | -1.18886 | 1.250162 | -2.88998 | 0.004284 | 0.014689 | -2.49128 |
| TBC1D12   | -0.5332  | 3.968544 | -2.88986 | 0.004285 | 0.014689 | -2.88595 |
| CASP3     | 0.48755  | 5.510047 | 2.889935 | 0.004284 | 0.014689 | -2.96079 |
| ZEB1      | -0.96379 | 4.920839 | -2.88999 | 0.004283 | 0.014689 | -3.01535 |
| PDP1      | 0.745395 | 5.80704  | 2.889109 | 0.004295 | 0.014719 | -2.96911 |
| PMFBP1    | 1.573749 | 0.010666 | 2.88885  | 0.004298 | 0.014727 | -2.16892 |
| FANCE     | 0.978729 | 3.739974 | 2.88871  | 0.0043   | 0.01473  | -2.59319 |
| CCDC56    | -0.61691 | 5.499408 | -2.88856 | 0.004302 | 0.014733 | -3.03245 |
| SMC3      | 0.426663 | 6.604309 | 2.887633 | 0.004314 | 0.014771 | -3.04098 |
| FLVCR1    | 0.957326 | 4.02503  | 2.88668  | 0.004327 | 0.01481  | -2.65454 |
| POLB      | 0.805369 | 3.768388 | 2.886222 | 0.004333 | 0.014824 | -2.63369 |
| COL3A1    | 1.372174 | 10.29109 | 2.886274 | 0.004332 | 0.014824 | -2.99328 |
| ELF2      | -0.35674 | 5.200273 | -2.885   | 0.004349 | 0.014875 | -3.01354 |
| DUSP1     | -1.26782 | 7.492394 | -2.88477 | 0.004352 | 0.014882 | -3.01248 |
| MFSD6     | -0.69048 | 6.59298  | -2.88427 | 0.004359 | 0.014901 | -3.05102 |
| HYI       | -0.59698 | 2.89572  | -2.88368 | 0.004367 | 0.014924 | -2.7154  |
| FAM161A   | -0.7472  | 2.289608 | -2.88324 | 0.004372 | 0.014934 | -2.62143 |
| ACBD6     | 0.500563 | 4.467307 | 2.883362 | 0.004371 | 0.014934 | -2.83666 |
| HNRNPA1   | 0.398895 | 7.775501 | 2.883228 | 0.004373 | 0.014934 | -3.05003 |
| DDTL      | -0.64544 | 3.691951 | -2.88077 | 0.004405 | 0.015042 | -2.88349 |
| C7orf46   | -1.29332 | 2.727075 | -2.87927 | 0.004426 | 0.015107 | -2.8123  |
| UBA2      | 0.459068 | 6.852066 | 2.879148 | 0.004427 | 0.015109 | -3.06883 |
| THAP2     | -0.62852 | 2.28864  | -2.87764 | 0.004448 | 0.015172 | -2.61897 |
| LRCH1     | -0.58377 | 5.100311 | -2.87763 | 0.004448 | 0.015172 | -3.04041 |
| ZNF506    | -0.88083 | 4.024996 | -2.87732 | 0.004452 | 0.015182 | -2.96574 |
| SLTM      | -0.40745 | 6.920833 | -2.87718 | 0.004454 | 0.015185 | -3.0694  |
| PSMG1     | 0.752788 | 4.585412 | 2.876573 | 0.004462 | 0.015209 | -2.83385 |
| UBE2Q1    | 0.332521 | 6.198715 | 2.876356 | 0.004465 | 0.015216 | -3.06039 |
| AGPAT1    | -0.47207 | 6.153023 | -2.87563 | 0.004475 | 0.015246 | -3.08021 |
| ATP2A2    | 0.409901 | 9.27187  | 2.875472 | 0.004477 | 0.015249 | -3.02867 |
| CAPS      | -0.99803 | 2.647613 | -2.87526 | 0.00448  | 0.015252 | -2.75672 |
| PPP1R8    | 0.340274 | 5.094376 | 2.875306 | 0.004479 | 0.015252 | -2.97095 |
| NPM1      | 0.539913 | 7.445373 | 2.874515 | 0.00449  | 0.015282 | -3.08173 |
| ARID5A    | -0.68313 | 4.696567 | -2.87411 | 0.004496 | 0.015298 | -3.02615 |
| RAB17     | -1.71057 | 1.824404 | -2.87368 | 0.004501 | 0.015314 | -2.71381 |
| RECQL     | 0.609807 | 5.481387 | 2.873421 | 0.004505 | 0.015322 | -2.99217 |
| CDK2AP1   | 0.599212 | 6.942238 | 2.873134 | 0.004509 | 0.015332 | -3.08464 |
| PRRX2     | 1.867768 | 2.757676 | 2.872822 | 0.004513 | 0.015341 | -2.37165 |
| CHL1      | -1.59507 | 2.453862 | -2.87278 | 0.004514 | 0.015341 | -2.83146 |
| FAM193A   | -0.40682 | 5.238425 | -2.87253 | 0.004517 | 0.015348 | -3.05359 |
| CASP1     | 1.500099 | 4.228255 | 2.871499 | 0.004531 | 0.015393 | -2.64077 |
| ANKRD13B  | 1.171022 | 3.814939 | 2.870858 | 0.00454  | 0.015419 | -2.62392 |
| KREMEN2   | 2.987909 | 1.424708 | 2.870375 | 0.004547 | 0.015431 | -2.22199 |
| ZNF606    | -1.10243 | 2.582128 | -2.87037 | 0.004547 | 0.015431 | -2.78082 |
| TRIP6     | 0.946766 | 5.616319 | 2.870496 | 0.004545 | 0.015431 | -2.98116 |

|           |          |          |          |          |          |          |
|-----------|----------|----------|----------|----------|----------|----------|
| GSTA4     | -1.13742 | 4.419237 | -2.87015 | 0.00455  | 0.015436 | -3.04539 |
| DYRK1A    | -0.39368 | 6.211362 | -2.87009 | 0.004551 | 0.015436 | -3.09545 |
| C19orf22  | 0.531233 | 6.368902 | 2.869924 | 0.004553 | 0.01544  | -3.07755 |
| AQP1      | -1.29923 | 6.121402 | -2.86969 | 0.004556 | 0.015448 | -3.08889 |
| NUDT3     | 0.443313 | 4.548078 | 2.868394 | 0.004574 | 0.015505 | -2.90156 |
| FASTKD3   | 0.520556 | 3.292778 | 2.868064 | 0.004579 | 0.015513 | -2.64085 |
| GATAD2A   | 0.408607 | 6.82469  | 2.868101 | 0.004578 | 0.015513 | -3.09961 |
| AP1M2     | 1.402649 | 5.829182 | 2.866976 | 0.004594 | 0.015555 | -2.96166 |
| CAPRIN1   | 0.408021 | 8.370346 | 2.867064 | 0.004593 | 0.015555 | -3.08066 |
| TES       | -0.58312 | 6.337672 | -2.86692 | 0.004595 | 0.015555 | -3.1037  |
| COL12A1   | 1.174974 | 7.894601 | 2.866776 | 0.004597 | 0.015558 | -3.10356 |
| FBXW2     | -0.39284 | 6.440949 | -2.86653 | 0.0046   | 0.015566 | -3.10543 |
| MMP19     | -0.68869 | 3.910788 | -2.86624 | 0.004604 | 0.015576 | -2.96164 |
| SMARCA1   | -1.01575 | 4.765692 | -2.8654  | 0.004616 | 0.015612 | -3.07645 |
| DOLPP1    | 0.652526 | 4.313263 | 2.864708 | 0.004626 | 0.015641 | -2.82836 |
| OGFR      | 0.473531 | 6.12265  | 2.864355 | 0.004631 | 0.015654 | -3.08233 |
| TMEM199   | 0.402133 | 4.101655 | 2.863874 | 0.004637 | 0.015673 | -2.83477 |
| BIK       | 1.705753 | 2.953728 | 2.863357 | 0.004645 | 0.015694 | -2.43575 |
| MLLT1     | -0.37571 | 6.705638 | -2.86295 | 0.00465  | 0.015709 | -3.11262 |
| ISL2      | 1.254203 | 0.657287 | 2.862078 | 0.004663 | 0.015747 | -2.24689 |
| HAGHL     | 1.518201 | 1.324448 | 2.861284 | 0.004674 | 0.015781 | -2.28491 |
| NXT2      | 0.755382 | 4.537106 | 2.861201 | 0.004675 | 0.015781 | -2.86425 |
| ITPR3     | 0.690269 | 8.73131  | 2.860835 | 0.00468  | 0.015795 | -3.09442 |
| GPAM      | -0.61629 | 4.184206 | -2.8597  | 0.004696 | 0.015846 | -3.00567 |
| C8orf73   | 1.861302 | 4.666886 | 2.859507 | 0.004699 | 0.01585  | -2.6912  |
| SLCO2A1   | -1.17542 | 5.147827 | -2.85945 | 0.0047   | 0.01585  | -3.11566 |
| TMEM194B  | 0.709621 | 2.990782 | 2.858475 | 0.004714 | 0.015893 | -2.58521 |
| LOC651250 | -0.55481 | 5.937529 | -2.85836 | 0.004715 | 0.015894 | -3.12591 |
| ZBED4     | 0.460838 | 5.820151 | 2.858137 | 0.004719 | 0.015901 | -3.07856 |
| EIF2B4    | -0.33521 | 4.921282 | -2.85798 | 0.004721 | 0.015905 | -3.06276 |
| MEA1      | 0.639999 | 5.465759 | 2.857126 | 0.004733 | 0.015942 | -3.032   |
| UPP1      | 1.500022 | 4.676079 | 2.856566 | 0.004741 | 0.015964 | -2.77069 |
| MCM3AP    | -0.39942 | 6.629693 | -2.85652 | 0.004742 | 0.015964 | -3.13103 |
| RGS20     | 2.568077 | -0.02566 | 2.856122 | 0.004747 | 0.015975 | -2.25452 |
| OSBPL9    | -0.42421 | 6.174369 | -2.85619 | 0.004746 | 0.015975 | -3.13348 |
| COQ2      | 0.473418 | 3.438371 | 2.855845 | 0.004751 | 0.015985 | -2.71036 |
| AGMAT     | 2.618221 | 2.296698 | 2.855298 | 0.004759 | 0.016004 | -2.29651 |
| TTC9C     | 0.461874 | 3.330502 | 2.855284 | 0.004759 | 0.016004 | -2.69186 |
| COL4A6    | -1.8096  | 3.420505 | -2.85507 | 0.004762 | 0.016011 | -3.04309 |
| CD34      | -0.89694 | 4.992976 | -2.85491 | 0.004765 | 0.016012 | -3.11254 |
| TP11      | 0.625451 | 8.266554 | 2.854879 | 0.004765 | 0.016012 | -3.1216  |
| MEX3A     | 1.937091 | 3.218058 | 2.853939 | 0.004779 | 0.016054 | -2.47244 |
| NKTR      | -0.61921 | 6.360502 | -2.85377 | 0.004781 | 0.016059 | -3.13915 |
| FCER1G    | 1.538655 | 4.5158   | 2.853521 | 0.004785 | 0.016067 | -2.73805 |
| MOGS      | 0.41504  | 6.049656 | 2.853047 | 0.004792 | 0.016086 | -3.11195 |
| ODF3B     | 1.026273 | 2.935518 | 2.852785 | 0.004795 | 0.016093 | -2.55063 |
| ZNF330    | -0.35592 | 4.466694 | -2.85274 | 0.004796 | 0.016093 | -3.03191 |
| RORA      | -1.03337 | 4.510789 | -2.85262 | 0.004798 | 0.016095 | -3.09443 |
| ATP5J2    | 0.716419 | 6.84979  | 2.852283 | 0.004803 | 0.016107 | -3.13734 |
| RGMA      | -1.76639 | 4.25847  | -2.85102 | 0.004821 | 0.016165 | -3.12062 |
| SDC2      | -0.96681 | 4.961435 | -2.85073 | 0.004825 | 0.016175 | -3.12549 |
| HTATIP2   | 0.807211 | 5.668678 | 2.850559 | 0.004828 | 0.01618  | -3.05477 |
| FAM117A   | -0.78468 | 3.774201 | -2.85035 | 0.004831 | 0.016185 | -2.99869 |
| CEP250    | 0.558118 | 5.889344 | 2.850297 | 0.004832 | 0.016185 | -3.09852 |
| GFM2      | -0.38845 | 4.741509 | -2.84977 | 0.004839 | 0.016207 | -3.07207 |
| TBC1D19   | -0.62477 | 1.794744 | -2.84901 | 0.00485  | 0.01624  | -2.60943 |
| TNFAIP3   | 1.102058 | 6.419679 | 2.848767 | 0.004854 | 0.016248 | -3.10443 |
| BAT1      | 0.327055 | 7.893905 | 2.848608 | 0.004856 | 0.016252 | -3.14131 |

|          |          |          |          |          |          |          |
|----------|----------|----------|----------|----------|----------|----------|
| ECSIT    | -0.50149 | 4.871852 | -2.84796 | 0.004866 | 0.01628  | -3.09849 |
| DHX37    | 0.45599  | 5.188899 | 2.847764 | 0.004869 | 0.016286 | -3.04519 |
| COIL     | 0.414938 | 4.367327 | 2.847398 | 0.004874 | 0.0163   | -2.92968 |
| SLC1A1   | -1.2907  | 2.902247 | -2.84667 | 0.004885 | 0.016328 | -2.93469 |
| ZNF236   | -0.42721 | 4.450255 | -2.84668 | 0.004885 | 0.016328 | -3.05346 |
| BTN2A3   | 0.852902 | 0.441294 | 2.845461 | 0.004903 | 0.016383 | -2.30151 |
| NR1D1    | 0.884008 | 5.40371  | 2.84527  | 0.004905 | 0.016389 | -3.03062 |
| SIRT6    | 0.561116 | 3.902237 | 2.845123 | 0.004908 | 0.016392 | -2.81537 |
| VPS37B   | -0.6809  | 6.245843 | -2.84337 | 0.004934 | 0.016475 | -3.16806 |
| MED19    | 0.527812 | 3.835445 | 2.843242 | 0.004935 | 0.016478 | -2.81301 |
| PPAN     | 0.539214 | 4.727105 | 2.842295 | 0.00495  | 0.016521 | -2.98837 |
| VAR5     | 0.511177 | 7.064932 | 2.84206  | 0.004953 | 0.016528 | -3.17221 |
| REG1A    | -3.11688 | 1.429484 | -2.84195 | 0.004955 | 0.016528 | -2.93869 |
| MRPS12   | 0.589719 | 4.721375 | 2.8419   | 0.004955 | 0.016528 | -2.9795  |
| ZSCAN2   | -0.59275 | 2.550334 | -2.84137 | 0.004963 | 0.016551 | -2.75863 |
| EPSTI1   | 1.818491 | 3.956605 | 2.840756 | 0.004973 | 0.016562 | -2.62666 |
| ANO10    | -0.50338 | 4.535315 | -2.84076 | 0.004972 | 0.016562 | -3.08608 |
| PHF14    | 0.557241 | 6.146128 | 2.840858 | 0.004971 | 0.016562 | -3.14316 |
| CLASP2   | -0.43312 | 5.51654  | -2.84097 | 0.004969 | 0.016562 | -3.15732 |
| FXWD3    | 1.394479 | 7.760365 | 2.84075  | 0.004973 | 0.016562 | -3.1734  |
| NBPF10   | -0.62043 | 5.187225 | -2.84045 | 0.004977 | 0.016573 | -3.15    |
| PSMA2    | 0.421307 | 6.725531 | 2.83985  | 0.004986 | 0.016599 | -3.17505 |
| LIPG     | 2.444327 | 3.425102 | 2.839547 | 0.004991 | 0.01661  | -2.47585 |
| SKAP2    | 0.618915 | 5.53735  | 2.839454 | 0.004992 | 0.016611 | -3.09013 |
| NGFR     | -1.77141 | 2.632735 | -2.83933 | 0.004994 | 0.016613 | -2.98147 |
| GNA14    | -1.22375 | 0.903169 | -2.83912 | 0.004997 | 0.01662  | -2.58116 |
| CXCL11   | 2.987388 | 1.885982 | 2.838491 | 0.005007 | 0.016647 | -2.30606 |
| FLJ23867 | -0.92062 | 5.48235  | -2.83719 | 0.005026 | 0.016709 | -3.18026 |
| ELN      | -1.49218 | 4.51054  | -2.83698 | 0.005029 | 0.016715 | -3.16153 |
| SNCG     | -1.27982 | 1.352494 | -2.83598 | 0.005045 | 0.016761 | -2.66982 |
| TTC15    | -0.37541 | 5.154866 | -2.83554 | 0.005051 | 0.01678  | -3.14669 |
| PDCD11   | 0.467765 | 6.254966 | 2.835285 | 0.005055 | 0.016789 | -3.16958 |
| MSH5     | 1.012955 | 4.225847 | 2.835164 | 0.005057 | 0.016791 | -2.82317 |
| HOXD10   | 3.46894  | 0.71409  | 2.834642 | 0.005065 | 0.016813 | -2.31287 |
| ERAL1    | 0.447758 | 5.911266 | 2.833916 | 0.005076 | 0.016846 | -3.15265 |
| RBM7     | -0.39142 | 4.639105 | -2.83365 | 0.00508  | 0.016855 | -3.10617 |
| NCOA4    | -0.4044  | 8.085926 | -2.83341 | 0.005084 | 0.016863 | -3.15922 |
| COX7A2   | -0.52618 | 6.538139 | -2.83163 | 0.005111 | 0.01695  | -3.19851 |
| OTUB1    | 0.475749 | 7.033899 | 2.830764 | 0.005124 | 0.01699  | -3.20299 |
| RETSAT   | -0.70504 | 5.89574  | -2.8303  | 0.005131 | 0.01701  | -3.20336 |
| SPG11    | -0.41174 | 6.531278 | -2.82973 | 0.00514  | 0.017035 | -3.20508 |
| NOXO1    | 2.000041 | 0.239722 | 2.829534 | 0.005143 | 0.017041 | -2.32419 |
| C1orf53  | 0.913932 | 0.436419 | 2.829405 | 0.005145 | 0.017043 | -2.33893 |
| C12orf47 | 0.444134 | 3.752845 | 2.828795 | 0.005155 | 0.01707  | -2.85115 |
| HAVCR2   | 1.561423 | 2.664541 | 2.828519 | 0.005159 | 0.01708  | -2.51334 |
| RFC2     | 0.70277  | 4.966718 | 2.828429 | 0.00516  | 0.017081 | -3.03994 |
| IRAK1BP1 | -0.63222 | 0.978902 | -2.82777 | 0.005171 | 0.017111 | -2.54956 |
| ACTR1B   | -0.45872 | 5.541086 | -2.82755 | 0.005174 | 0.017118 | -3.19589 |
| CCDC74A  | 1.457365 | 1.577763 | 2.826931 | 0.005183 | 0.017146 | -2.40437 |
| CYTIP    | -0.96921 | 2.703388 | -2.82659 | 0.005189 | 0.017155 | -2.89618 |
| SUSD2    | -1.06221 | 3.143436 | -2.82652 | 0.00519  | 0.017155 | -2.99794 |
| SOS1     | -0.38348 | 6.511792 | -2.82658 | 0.005189 | 0.017155 | -3.21409 |
| TAF5     | 0.486656 | 2.981357 | 2.826156 | 0.005196 | 0.017169 | -2.70381 |
| MKNK1    | -0.37032 | 4.969135 | -2.82572 | 0.005202 | 0.01718  | -3.15767 |
| EPB49    | -0.93972 | 4.871778 | -2.8258  | 0.005201 | 0.01718  | -3.18664 |
| PDIA3    | 0.475668 | 8.59178  | 2.825725 | 0.005202 | 0.01718  | -3.18872 |
| EFHD1    | -1.07752 | 2.000829 | -2.82548 | 0.005206 | 0.017188 | -2.78005 |
| FBXO31   | -0.38986 | 5.076675 | -2.8248  | 0.005217 | 0.017219 | -3.17083 |

|           |          |          |          |          |          |          |
|-----------|----------|----------|----------|----------|----------|----------|
| LPHN2     | -1.06687 | 5.57263  | -2.82409 | 0.005228 | 0.017251 | -3.21922 |
| ZNF211    | -0.65121 | 3.117573 | -2.82342 | 0.005238 | 0.017282 | -2.93423 |
| ARHGAP31  | -0.78431 | 4.498456 | -2.82316 | 0.005242 | 0.017291 | -3.15485 |
| TRIM28    | 0.551495 | 8.475749 | 2.822058 | 0.00526  | 0.017345 | -3.204   |
| TUBBP5    | 2.60504  | 0.844778 | 2.821967 | 0.005261 | 0.017345 | -2.34581 |
| MTDH      | 0.384771 | 8.134371 | 2.82094  | 0.005277 | 0.017395 | -3.21214 |
| FANCC     | 0.568518 | 4.058142 | 2.819758 | 0.005296 | 0.017449 | -2.91335 |
| C7orf30   | 0.483477 | 3.996619 | 2.81974  | 0.005296 | 0.017449 | -2.91878 |
| FOXO1     | -0.73996 | 5.525725 | -2.8192  | 0.005305 | 0.017473 | -3.22658 |
| C2orf29   | 0.456116 | 6.049683 | 2.816253 | 0.005352 | 0.01762  | -3.20967 |
| PLEKHA6   | -2.03048 | 4.775327 | -2.8163  | 0.005351 | 0.01762  | -3.23534 |
| BUD31     | 0.615603 | 5.819696 | 2.816026 | 0.005356 | 0.017627 | -3.18102 |
| C16orf57  | 0.539748 | 6.128301 | 2.815596 | 0.005362 | 0.017646 | -3.21165 |
| MRM1      | 0.714074 | 2.376063 | 2.815372 | 0.005366 | 0.017654 | -2.60992 |
| SLC15A2   | 1.45792  | 2.660481 | 2.813526 | 0.005396 | 0.017747 | -2.56493 |
| CCDC74B   | 1.544114 | 0.170758 | 2.813327 | 0.005399 | 0.017753 | -2.36552 |
| STK4      | 0.47447  | 6.268198 | 2.812187 | 0.005417 | 0.01781  | -3.23248 |
| WDR5      | 0.483839 | 5.788497 | 2.81187  | 0.005423 | 0.017822 | -3.19998 |
| GPR172B   | 2.382333 | 0.94908  | 2.811452 | 0.005429 | 0.017841 | -2.3731  |
| KCNJ15    | -1.61902 | 2.901896 | -2.81105 | 0.005436 | 0.017858 | -3.07625 |
| CNN3      | -0.77706 | 6.073297 | -2.81083 | 0.005439 | 0.017865 | -3.25664 |
| ALKBH6    | 0.612259 | 3.314111 | 2.810433 | 0.005446 | 0.017882 | -2.78558 |
| NIPSNAP3B | -0.84807 | 0.424607 | -2.81031 | 0.005448 | 0.017885 | -2.54947 |
| FAM117B   | 0.701383 | 5.117765 | 2.809331 | 0.005464 | 0.017933 | -3.11318 |
| AIM1      | 1.048235 | 6.939418 | 2.808489 | 0.005478 | 0.017974 | -3.24845 |
| SPOCD1    | 1.748651 | 1.695477 | 2.807777 | 0.005489 | 0.018003 | -2.43936 |
| LMO4      | -0.76513 | 5.938227 | -2.80783 | 0.005488 | 0.018003 | -3.26474 |
| HIST1H4H  | 1.650163 | 2.189441 | 2.806724 | 0.005506 | 0.018052 | -2.50275 |
| RUNX3     | 1.781174 | 4.653726 | 2.806785 | 0.005505 | 0.018052 | -2.84429 |
| MBTPS1    | -0.37239 | 6.986129 | -2.80618 | 0.005515 | 0.018077 | -3.26229 |
| EDN1      | -0.86482 | 3.471284 | -2.80591 | 0.00552  | 0.018087 | -3.08188 |
| MAP4      | -0.50945 | 8.08449  | -2.8058  | 0.005522 | 0.018089 | -3.23083 |
| COL10A1   | 4.752827 | 2.926796 | 2.805643 | 0.005524 | 0.018093 | -2.39309 |
| WWP1      | -0.46075 | 5.959373 | -2.80557 | 0.005525 | 0.018093 | -3.26835 |
| HLA-H     | 0.9972   | 5.751398 | 2.80292  | 0.005569 | 0.018232 | -3.17378 |
| ACAN      | 2.383818 | 2.200734 | 2.801667 | 0.00559  | 0.018293 | -2.44564 |
| SPAG7     | -0.4874  | 4.280034 | -2.80165 | 0.00559  | 0.018293 | -3.16178 |
| PPFIA3    | 1.220355 | 3.835341 | 2.801371 | 0.005595 | 0.018303 | -2.80506 |
| RFX5      | 0.52014  | 5.674819 | 2.801102 | 0.0056   | 0.018314 | -3.216   |
| CCNJL     | -1.17966 | 1.6309   | -2.80031 | 0.005613 | 0.018353 | -2.78838 |
| EPB41L5   | -0.5786  | 4.294518 | -2.7999  | 0.00562  | 0.018371 | -3.17662 |
| LRRN1     | -1.65499 | 0.787488 | -2.79938 | 0.005628 | 0.018395 | -2.72531 |
| THAP6     | -0.38312 | 3.893765 | -2.79922 | 0.005631 | 0.0184   | -3.10251 |
| GTPBP3    | 0.573038 | 3.94982  | 2.799093 | 0.005633 | 0.018402 | -2.94773 |
| COG8      | -0.37711 | 4.415438 | -2.79871 | 0.00564  | 0.018419 | -3.1741  |
| ESR1      | -1.24107 | 0.264826 | -2.79751 | 0.00566  | 0.01848  | -2.60717 |
| CREB3     | -0.51925 | 4.931193 | -2.7965  | 0.005677 | 0.018532 | -3.24407 |
| APBB3     | -0.53347 | 3.158151 | -2.79588 | 0.005687 | 0.018561 | -2.99436 |
| KARS      | 0.418556 | 7.020443 | 2.795815 | 0.005688 | 0.018561 | -3.29758 |
| TIFA      | -0.55684 | 3.490623 | -2.79464 | 0.005708 | 0.018622 | -3.07092 |
| C16orf88  | 0.617378 | 4.516304 | 2.794443 | 0.005712 | 0.018628 | -3.06505 |
| ADAMTS9   | -1.14876 | 4.224473 | -2.7943  | 0.005714 | 0.018631 | -3.23519 |
| EXOSC4    | 0.717971 | 4.081406 | 2.794117 | 0.005717 | 0.018637 | -2.96001 |
| IL1A      | 3.784879 | 2.010141 | 2.793286 | 0.005731 | 0.018679 | -2.4226  |
| CASK      | 0.636071 | 6.713084 | 2.792084 | 0.005752 | 0.018742 | -3.29856 |
| OCRL      | -0.47857 | 5.880563 | -2.79197 | 0.005754 | 0.018744 | -3.30365 |
| ZNF836    | -0.50774 | 2.33501  | -2.79172 | 0.005758 | 0.018753 | -2.83824 |
| FAM58A    | 0.551245 | 3.658034 | 2.790758 | 0.005774 | 0.018798 | -2.91491 |

|           |          |          |          |          |          |          |
|-----------|----------|----------|----------|----------|----------|----------|
| SFRS12    | -0.39886 | 6.277289 | -2.79082 | 0.005773 | 0.018798 | -3.3111  |
| C19orf24  | 0.583441 | 4.830473 | 2.790647 | 0.005776 | 0.0188   | -3.13644 |
| B3GALT6   | 0.544895 | 4.626128 | 2.790125 | 0.005785 | 0.018823 | -3.11004 |
| SLC25A39  | 0.500583 | 7.284704 | 2.790075 | 0.005786 | 0.018823 | -3.31246 |
| SCRIB     | 0.561463 | 7.460042 | 2.789335 | 0.005799 | 0.01886  | -3.3132  |
| TMOD2     | -0.80515 | 4.108154 | -2.78799 | 0.005822 | 0.018931 | -3.21036 |
| C19orf28  | 0.563642 | 6.146612 | 2.787774 | 0.005826 | 0.018939 | -3.28621 |
| PIIP5K2   | -0.42122 | 5.518509 | -2.78711 | 0.005837 | 0.018971 | -3.30232 |
| CHST1     | 1.992499 | 2.638429 | 2.78697  | 0.00584  | 0.018975 | -2.57056 |
| WWC3      | -0.78526 | 5.660329 | -2.78686 | 0.005842 | 0.018977 | -3.31783 |
| LGALS9B   | -1.85535 | -0.31378 | -2.78662 | 0.005846 | 0.018986 | -2.62338 |
| ATXN7L3B  | -0.51017 | 6.986087 | -2.78647 | 0.005848 | 0.01899  | -3.31279 |
| EGLN1     | -0.41427 | 6.229862 | -2.78631 | 0.005851 | 0.018994 | -3.32301 |
| SPRY1     | -0.80924 | 4.697433 | -2.78565 | 0.005863 | 0.019028 | -3.2748  |
| ATP5B     | -0.43252 | 9.049338 | -2.78551 | 0.005865 | 0.019031 | -3.25534 |
| HIST1H2BD | 1.481035 | 3.377747 | 2.785126 | 0.005872 | 0.019048 | -2.73308 |
| SHISA5    | 0.412639 | 7.371121 | 2.784858 | 0.005876 | 0.019059 | -3.32472 |
| HIST3H2A  | 1.539789 | 1.872757 | 2.784739 | 0.005879 | 0.019061 | -2.53609 |
| TMC7      | 1.792963 | 3.311423 | 2.783965 | 0.005892 | 0.019101 | -2.68498 |
| ANKRD16   | -0.51202 | 2.898141 | -2.78284 | 0.005912 | 0.01916  | -2.97332 |
| RASD1     | -1.14979 | 2.620409 | -2.78251 | 0.005918 | 0.019174 | -3.03197 |
| FAM46B    | -1.44402 | 3.220706 | -2.78215 | 0.005924 | 0.01919  | -3.18134 |
| ZNF407    | -0.41356 | 4.066561 | -2.78169 | 0.005932 | 0.019212 | -3.17975 |
| PSD3      | -0.85963 | 5.608977 | -2.78131 | 0.005939 | 0.019229 | -3.33275 |
| IFIT3     | 1.59852  | 5.065608 | 2.781131 | 0.005942 | 0.019235 | -3.0294  |
| ANKRD37   | -0.92344 | 1.927406 | -2.78096 | 0.005945 | 0.01924  | -2.86007 |
| SNW1      | 0.355658 | 5.661207 | 2.779625 | 0.005968 | 0.019312 | -3.28553 |
| HIST2H2BF | -0.96033 | 1.872435 | -2.77904 | 0.005979 | 0.019341 | -2.8573  |
| ADRBK1    | 0.472757 | 7.341514 | 2.778346 | 0.005991 | 0.019376 | -3.34311 |
| RYBP      | -0.43083 | 5.586405 | -2.77782 | 0.006    | 0.019402 | -3.33068 |
| G2E3      | 0.541767 | 5.027137 | 2.777193 | 0.006011 | 0.019433 | -3.20618 |
| CBX6      | -0.99465 | 4.823833 | -2.77613 | 0.00603  | 0.01949  | -3.3206  |
| APEX1     | 0.462559 | 6.909292 | 2.775929 | 0.006034 | 0.019497 | -3.34963 |
| C8orf47   | -1.70062 | -0.27277 | -2.77454 | 0.006059 | 0.019573 | -2.64517 |
| IFRD2     | -0.56055 | 5.475558 | -2.77444 | 0.00606  | 0.019574 | -3.33943 |
| ZNF444    | -0.59673 | 4.574375 | -2.77408 | 0.006067 | 0.019591 | -3.27744 |
| PPP1R13B  | -0.5115  | 5.762719 | -2.77322 | 0.006083 | 0.019636 | -3.35147 |
| LOC1      | -1.28093 | 3.132735 | -2.77294 | 0.006087 | 0.019648 | -3.17699 |
| BACE1     | -0.58394 | 5.554735 | -2.77261 | 0.006093 | 0.019662 | -3.34849 |
| DPP9      | 0.375107 | 6.828426 | 2.772225 | 0.0061   | 0.01968  | -3.35959 |
| ELK4      | 0.57041  | 4.429758 | 2.771484 | 0.006114 | 0.019719 | -3.11864 |
| NANP      | 0.493264 | 3.586135 | 2.771364 | 0.006116 | 0.019721 | -2.96216 |
| ULBP3     | 1.112867 | 2.035572 | 2.770303 | 0.006135 | 0.019778 | -2.63617 |
| CCDC28B   | 0.855582 | 1.538365 | 2.770132 | 0.006138 | 0.01978  | -2.60493 |
| TSEN34    | 0.439508 | 5.151614 | 2.770124 | 0.006138 | 0.01978  | -3.25174 |
| ABCA13    | 5.040732 | 3.017071 | 2.769835 | 0.006144 | 0.019792 | -2.48449 |
| C6orf120  | -0.39891 | 5.499385 | -2.76905 | 0.006158 | 0.019834 | -3.34864 |
| TMEM181   | -0.5775  | 6.406891 | -2.76892 | 0.00616  | 0.019836 | -3.3681  |
| PCDHGB5   | -1.35678 | 0.905928 | -2.76855 | 0.006167 | 0.019853 | -2.78746 |
| ZNF23     | -0.43605 | 3.02324  | -2.76794 | 0.006178 | 0.019885 | -3.02554 |
| GSDMD     | 0.690101 | 5.20849  | 2.767771 | 0.006181 | 0.01989  | -3.23618 |
| UNC119B   | -0.56804 | 5.123468 | -2.76704 | 0.006195 | 0.019929 | -3.34067 |
| IL21R     | 1.738399 | 0.961329 | 2.764142 | 0.006248 | 0.020095 | -2.49384 |
| FBXO10    | -0.57712 | 3.060081 | -2.76383 | 0.006253 | 0.020109 | -3.07045 |
| PCDHGA12  | -0.97709 | 1.221098 | -2.76293 | 0.00627  | 0.020157 | -2.79847 |
| C2orf63   | -0.71465 | 1.253466 | -2.76285 | 0.006271 | 0.020157 | -2.76811 |
| GAS5      | 0.645214 | 5.720135 | 2.762453 | 0.006279 | 0.020177 | -3.31267 |
| MUC16     | 3.912027 | 1.05201  | 2.761752 | 0.006292 | 0.020214 | -2.50008 |

|              |          |          |          |          |          |          |
|--------------|----------|----------|----------|----------|----------|----------|
| CDS2         | -0.37726 | 4.969467 | -2.76055 | 0.006314 | 0.020281 | -3.33308 |
| MAD2L2       | 0.759684 | 4.514694 | 2.760317 | 0.006319 | 0.020282 | -3.13105 |
| SUZ12        | 0.443563 | 6.007102 | 2.760399 | 0.006317 | 0.020282 | -3.35717 |
| HNRNPA1L2    | 0.381919 | 6.105486 | 2.760288 | 0.006319 | 0.020282 | -3.36723 |
| MACROD1      | -0.75282 | 3.576553 | -2.75995 | 0.006325 | 0.020293 | -3.20599 |
| TMX1         | 0.483672 | 6.212295 | 2.759963 | 0.006325 | 0.020293 | -3.36877 |
| C21orf33     | -0.50551 | 4.88093  | -2.75978 | 0.006329 | 0.020299 | -3.33708 |
| LOC100132288 | -1.00372 | 3.155581 | -2.75935 | 0.006336 | 0.02032  | -3.1741  |
| NOTCH4       | -0.84423 | 4.400697 | -2.75815 | 0.006359 | 0.020386 | -3.32415 |
| OGDH         | -0.53459 | 7.750695 | -2.7581  | 0.00636  | 0.020386 | -3.36832 |
| POMT1        | -0.5323  | 4.23505  | -2.75759 | 0.006369 | 0.020411 | -3.2782  |
| RCBTB2       | -0.6596  | 3.52382  | -2.75732 | 0.006375 | 0.020423 | -3.19286 |
| SARS         | -0.45514 | 6.638835 | -2.75646 | 0.006391 | 0.02047  | -3.39976 |
| NAA15        | 0.388153 | 6.339695 | 2.756261 | 0.006394 | 0.020477 | -3.389   |
| HEXIM1       | -0.44125 | 5.309479 | -2.75456 | 0.006427 | 0.020575 | -3.37869 |
| AMY2B        | -1.03012 | 0.854639 | -2.75356 | 0.006445 | 0.020631 | -2.77486 |
| SLC9A9       | -1.18695 | 2.595974 | -2.75234 | 0.006469 | 0.020701 | -3.1173  |
| CSNK1G2      | 0.376658 | 6.223706 | 2.751695 | 0.006481 | 0.020735 | -3.39637 |
| C10orf10     | -1.11215 | 5.400184 | -2.75158 | 0.006483 | 0.020738 | -3.41131 |
| CD9          | 0.980292 | 8.347121 | 2.751395 | 0.006487 | 0.020744 | -3.405   |
| SIRPG        | 1.636496 | 0.426626 | 2.750998 | 0.006494 | 0.020763 | -2.52467 |
| ABCC6        | -1.52543 | 0.942072 | -2.75051 | 0.006503 | 0.020788 | -2.85449 |
| MAN1B1       | 0.440437 | 5.983294 | 2.750159 | 0.00651  | 0.020805 | -3.38278 |
| POLR1C       | 0.743074 | 4.583678 | 2.749886 | 0.006515 | 0.020817 | -3.1753  |
| N4BP2L2      | -0.52103 | 5.868096 | -2.74981 | 0.006517 | 0.020817 | -3.41636 |
| POLR3K       | 0.682489 | 3.193275 | 2.749474 | 0.006523 | 0.020833 | -2.91219 |
| SUMO1P3      | 0.428912 | 4.021153 | 2.749035 | 0.006532 | 0.020855 | -3.12168 |
| PPFIA1       | 0.956686 | 7.108213 | 2.748279 | 0.006546 | 0.020896 | -3.41758 |
| CDKL3        | -0.48272 | 0.042664 | -2.74784 | 0.006555 | 0.020919 | -2.6281  |
| ZNF426       | -0.85565 | 3.051552 | -2.74773 | 0.006557 | 0.020921 | -3.16122 |
| IFNGR1       | 0.57008  | 6.861898 | 2.747585 | 0.00656  | 0.020925 | -3.42244 |
| BARD1        | 0.749169 | 3.070871 | 2.747035 | 0.00657  | 0.020954 | -2.88949 |
| EZR          | -0.7305  | 8.750494 | -2.74666 | 0.006577 | 0.020972 | -3.35956 |
| PPHLN1       | 0.313731 | 5.345192 | 2.746303 | 0.006584 | 0.020989 | -3.34813 |
| KIAA1530     | -0.55869 | 3.575848 | -2.74585 | 0.006593 | 0.021008 | -3.21406 |
| CBX1         | 0.718964 | 5.552804 | 2.745916 | 0.006592 | 0.021008 | -3.33272 |
| ZNF131       | 0.545143 | 5.124543 | 2.745414 | 0.006601 | 0.021029 | -3.30266 |
| FA2H         | -1.76654 | 3.75468  | -2.74465 | 0.006616 | 0.021072 | -3.36515 |
| PIGL         | -0.5394  | 2.400743 | -2.74397 | 0.006629 | 0.021104 | -2.97873 |
| FAM105B      | 0.55443  | 5.341665 | 2.743979 | 0.006629 | 0.021104 | -3.33076 |
| COL27A1      | 1.291927 | 4.87555  | 2.74343  | 0.00664  | 0.021133 | -3.14652 |
| CHCHD10      | -0.6976  | 5.824682 | -2.74259 | 0.006656 | 0.02118  | -3.43719 |
| CEP170       | 0.70701  | 5.491898 | 2.742426 | 0.00666  | 0.021186 | -3.336   |
| ARFGAP3      | -0.45349 | 5.776175 | -2.74209 | 0.006666 | 0.021201 | -3.433   |
| USP8         | -0.34001 | 6.101188 | -2.74203 | 0.006667 | 0.021201 | -3.43848 |
| CELF6        | -0.88809 | 0.612524 | -2.74143 | 0.006679 | 0.021233 | -2.75639 |
| NCBP1        | 0.404854 | 5.922346 | 2.741055 | 0.006686 | 0.021252 | -3.40489 |
| TMEM39B      | 0.524743 | 4.11614  | 2.740942 | 0.006689 | 0.021254 | -3.14512 |
| BAHD1        | -0.40851 | 5.43744  | -2.74084 | 0.00669  | 0.021255 | -3.42057 |
| SNAPC1       | 1.070249 | 3.734805 | 2.740333 | 0.006701 | 0.021282 | -2.97262 |
| CREG2        | 2.126614 | -0.10737 | 2.740118 | 0.006705 | 0.021291 | -2.55005 |
| NOP10        | 0.585235 | 5.532345 | 2.73985  | 0.00671  | 0.021302 | -3.35899 |
| PAPOLG       | 0.374846 | 4.68787  | 2.738908 | 0.006729 | 0.021356 | -3.28154 |
| CCL22        | 1.729509 | 2.072713 | 2.737982 | 0.006747 | 0.021394 | -2.65938 |
| EMILIN3      | -1.22644 | 0.380482 | -2.73787 | 0.006749 | 0.021394 | -2.77415 |
| MACROD2      | -1.45591 | 0.626359 | -2.73781 | 0.00675  | 0.021394 | -2.83632 |
| ZNF225       | -0.56205 | 1.574524 | -2.73776 | 0.006751 | 0.021394 | -2.86057 |
| YEATS4       | 0.766563 | 4.227224 | 2.737786 | 0.006751 | 0.021394 | -3.13012 |



|          |          |          |          |          |          |          |
|----------|----------|----------|----------|----------|----------|----------|
| ATG16L2  | -0.63779 | 3.74496  | -2.73792 | 0.006748 | 0.021394 | -3.27659 |
| SEC61G   | 0.86602  | 6.039079 | 2.738131 | 0.006744 | 0.021394 | -3.38743 |
| TSPAN11  | -0.94564 | 2.886163 | -2.73742 | 0.006758 | 0.021411 | -3.16921 |
| CH25H    | -1.34401 | 1.213176 | -2.73644 | 0.006777 | 0.021456 | -2.92055 |
| RUNX2    | 1.388538 | 3.776623 | 2.736394 | 0.006778 | 0.021456 | -2.9354  |
| HAUS7    | 0.675989 | 3.611635 | 2.736413 | 0.006778 | 0.021456 | -3.02574 |
| AGPAT3   | -0.4876  | 6.624874 | -2.73652 | 0.006776 | 0.021456 | -3.45219 |
| ZNF800   | -0.43571 | 4.965745 | -2.73603 | 0.006786 | 0.021474 | -3.40176 |
| RHOV     | 3.430481 | 4.205589 | 2.734984 | 0.006806 | 0.021535 | -2.73465 |
| ZNF561   | -0.46472 | 4.747535 | -2.73486 | 0.006809 | 0.021538 | -3.38748 |
| ATAD3C   | 1.524759 | 0.37892  | 2.734683 | 0.006812 | 0.021539 | -2.56535 |
| WFS1     | -0.76587 | 5.628472 | -2.73468 | 0.006812 | 0.021539 | -3.45532 |
| HMGB1    | 0.458765 | 7.918606 | 2.734273 | 0.00682  | 0.021557 | -3.44975 |
| LDOC1L   | -0.57122 | 5.561561 | -2.73424 | 0.006821 | 0.021557 | -3.44985 |
| ZNF160   | -0.99468 | 4.097192 | -2.73221 | 0.006862 | 0.02168  | -3.37524 |
| SPEG     | -1.39116 | 3.615169 | -2.73179 | 0.00687  | 0.021702 | -3.36028 |
| C11orf9  | -2.36696 | 4.806178 | -2.73164 | 0.006873 | 0.021707 | -3.45849 |
| ZGPAT    | 0.382298 | 4.853447 | 2.731324 | 0.006879 | 0.021722 | -3.32343 |
| SPP1     | 4.011863 | 5.805661 | 2.730002 | 0.006906 | 0.021801 | -2.89023 |
| SP6      | 1.787394 | 3.085142 | 2.7293   | 0.00692  | 0.021841 | -2.79829 |
| SBNO2    | 0.498236 | 7.149782 | 2.727426 | 0.006958 | 0.021956 | -3.47912 |
| CCL20    | 4.58753  | 3.820392 | 2.726764 | 0.006972 | 0.021993 | -2.60139 |
| RCCD1    | 0.66315  | 3.716097 | 2.726598 | 0.006975 | 0.021999 | -3.07344 |
| TMEM161A | 0.564626 | 4.64777  | 2.726508 | 0.006977 | 0.022    | -3.27871 |
| C9orf16  | 0.659069 | 6.195774 | 2.725897 | 0.006989 | 0.022034 | -3.44761 |
| ARHGEF18 | -0.47179 | 6.408504 | -2.7255  | 0.006997 | 0.022055 | -3.48384 |
| ITFG1    | -0.38812 | 5.537084 | -2.72541 | 0.006999 | 0.022055 | -3.46534 |
| FOXF2    | -0.88375 | 3.556937 | -2.7253  | 0.007001 | 0.022057 | -3.31489 |
| NCK1     | 0.653786 | 5.245537 | 2.723952 | 0.007029 | 0.022135 | -3.36193 |
| FBXO30   | -0.50025 | 4.976024 | -2.72399 | 0.007028 | 0.022135 | -3.43937 |
| POLR2K   | 0.48839  | 5.689151 | 2.723298 | 0.007043 | 0.02217  | -3.42632 |
| RPL28    | 0.597712 | 9.754263 | 2.723252 | 0.007043 | 0.02217  | -3.42695 |
| EVC      | -1.14668 | 4.291936 | -2.72119 | 0.007086 | 0.022298 | -3.43602 |
| RSF1     | -0.42015 | 5.941934 | -2.72099 | 0.00709  | 0.022306 | -3.49201 |
| FN3K     | -0.96992 | 3.730735 | -2.71972 | 0.007116 | 0.022384 | -3.35961 |
| RPS2     | 0.589551 | 8.712028 | 2.71916  | 0.007128 | 0.022415 | -3.47197 |
| PADI3    | 3.721977 | 0.814487 | 2.718709 | 0.007137 | 0.02244  | -2.6071  |
| ZBTB12   | 0.871063 | 1.761211 | 2.718578 | 0.00714  | 0.02244  | -2.76232 |
| SLC12A2  | -1.38473 | 6.494403 | -2.71855 | 0.007141 | 0.02244  | -3.48553 |
| SLAIN2   | -0.4533  | 6.407319 | -2.71827 | 0.007147 | 0.022454 | -3.50293 |
| DIAPH3   | 0.90582  | 3.962584 | 2.716996 | 0.007173 | 0.022532 | -3.10052 |
| CNTNAP3  | -1.35272 | 1.960458 | -2.71523 | 0.00721  | 0.022634 | -3.11532 |
| TMEM65   | 0.817235 | 4.708561 | 2.715351 | 0.007207 | 0.022634 | -3.27775 |
| AKIRIN1  | -0.43401 | 5.788653 | -2.71521 | 0.00721  | 0.022634 | -3.50349 |
| KIF2A    | 0.466609 | 5.039454 | 2.715093 | 0.007213 | 0.022637 | -3.38026 |
| BCDIN3D  | -0.45246 | 2.485574 | -2.71443 | 0.007227 | 0.022675 | -3.05788 |
| ARHGAP17 | -0.41743 | 6.014934 | -2.71392 | 0.007238 | 0.022704 | -3.51187 |
| EIF3C    | 1.289108 | 4.274874 | 2.71375  | 0.007241 | 0.02271  | -3.1113  |
| RNF130   | -0.7894  | 5.272753 | -2.71357 | 0.007245 | 0.022716 | -3.49988 |
| MRPL51   | 0.513677 | 5.565408 | 2.713434 | 0.007248 | 0.022717 | -3.43819 |
| MRPL34   | -0.45524 | 4.76602  | -2.71341 | 0.007248 | 0.022717 | -3.44445 |
| C1orf35  | 0.540439 | 3.751453 | 2.712424 | 0.007269 | 0.022777 | -3.14074 |
| KLHDC9   | -1.06538 | 0.151802 | -2.71184 | 0.007281 | 0.022811 | -2.79234 |
| C16orf70 | 0.458256 | 4.858841 | 2.71161  | 0.007286 | 0.022821 | -3.36714 |
| FANCM    | 0.672052 | 3.474877 | 2.711224 | 0.007294 | 0.022841 | -3.06541 |
| APPBP2   | -0.37986 | 5.57045  | -2.71097 | 0.0073   | 0.022851 | -3.50444 |
| GPR124   | -0.8736  | 5.552131 | -2.71092 | 0.007301 | 0.022851 | -3.51773 |
| HCN2     | -1.13988 | 0.650584 | -2.71068 | 0.007306 | 0.022857 | -2.87235 |

|            |          |          |          |          |          |          |
|------------|----------|----------|----------|----------|----------|----------|
| RPL23AP53  | -0.54812 | 2.927226 | -2.71072 | 0.007305 | 0.022857 | -3.17598 |
| PPP1CB     | -0.49847 | 8.471771 | -2.7105  | 0.00731  | 0.022859 | -3.47065 |
| NIPA2      | 0.413224 | 6.133017 | 2.710521 | 0.007309 | 0.022859 | -3.49797 |
| ZNF346     | -0.38913 | 3.604375 | -2.71022 | 0.007316 | 0.022872 | -3.28701 |
| TADA1      | 0.374993 | 4.109835 | 2.709999 | 0.00732  | 0.022877 | -3.25143 |
| ZNF589     | -0.53089 | 3.623471 | -2.71004 | 0.00732  | 0.022877 | -3.31386 |
| NCRNA00081 | -0.438   | 3.2158   | -2.70898 | 0.007342 | 0.022939 | -3.2182  |
| CNKSRI     | 1.00601  | 4.611133 | 2.708696 | 0.007348 | 0.022953 | -3.23486 |
| ZFX        | -0.47034 | 5.3975   | -2.70859 | 0.00735  | 0.022955 | -3.50584 |
| FCHO2      | -0.62234 | 5.465272 | -2.70844 | 0.007354 | 0.02296  | -3.51532 |
| COL5A1     | 1.270836 | 7.90139  | 2.708308 | 0.007356 | 0.022964 | -3.5281  |
| ATF7       | -0.36923 | 6.532202 | -2.70774 | 0.007369 | 0.022996 | -3.5301  |
| C7orf63    | -0.89052 | 1.309729 | -2.70647 | 0.007396 | 0.023076 | -2.94429 |
| ST3GAL3    | -0.80946 | 2.654154 | -2.70586 | 0.007409 | 0.023112 | -3.1809  |
| ULK1       | -0.66198 | 6.451706 | -2.7056  | 0.007415 | 0.023124 | -3.5332  |
| SMPD3      | -1.53413 | 3.422669 | -2.70532 | 0.007421 | 0.023138 | -3.4129  |
| OCEL1      | -0.58812 | 2.500997 | -2.70464 | 0.007435 | 0.023178 | -3.10778 |
| DCUN1D3    | -0.55864 | 3.209525 | -2.7044  | 0.00744  | 0.023189 | -3.25227 |
| METRN      | -0.83963 | 2.99641  | -2.7041  | 0.007447 | 0.023204 | -3.25746 |
| MCTP2      | 0.817371 | 4.809861 | 2.703524 | 0.007459 | 0.023238 | -3.32355 |
| IBTK       | -0.56978 | 6.462884 | -2.70336 | 0.007463 | 0.023238 | -3.54011 |
| UBE4B      | -0.46497 | 6.522833 | -2.7034  | 0.007462 | 0.023238 | -3.54052 |
| LPPR2      | -0.64602 | 4.826485 | -2.70246 | 0.007482 | 0.023294 | -3.49342 |
| MADD       | -0.43314 | 5.944984 | -2.70195 | 0.007493 | 0.023323 | -3.54198 |
| SLC16A10   | -1.11992 | 0.849673 | -2.70105 | 0.007513 | 0.023377 | -2.91751 |
| HMBX1      | -0.5175  | 3.218315 | -2.70092 | 0.007516 | 0.023377 | -3.2536  |
| TPT1       | -0.62383 | 10.57527 | -2.70095 | 0.007515 | 0.023377 | -3.42136 |
| CYB5R2     | 1.506039 | 3.264594 | 2.700833 | 0.007518 | 0.023378 | -2.93319 |
| SH3D19     | -0.55433 | 6.488344 | -2.70024 | 0.007531 | 0.023413 | -3.54812 |
| FAM120AOS  | -0.40422 | 5.321585 | -2.6994  | 0.007549 | 0.023465 | -3.52198 |
| GATA2      | -0.89786 | 2.086017 | -2.69854 | 0.007568 | 0.023518 | -3.0989  |
| EPOR       | -0.81687 | 1.530698 | -2.69798 | 0.00758  | 0.023551 | -2.98752 |
| ZNF296     | 0.843483 | 2.957562 | 2.697616 | 0.007588 | 0.023568 | -2.9837  |
| ACVR1      | 0.498872 | 5.512462 | 2.697577 | 0.007589 | 0.023568 | -3.47546 |
| FIBIN      | -1.16604 | 1.793583 | -2.6972  | 0.007597 | 0.023589 | -3.09479 |
| ZNF559     | -0.93358 | 2.519601 | -2.69702 | 0.007601 | 0.023596 | -3.19677 |
| ZNF136     | -0.51365 | 3.052533 | -2.6966  | 0.00761  | 0.023619 | -3.23118 |
| FJX1       | 1.427518 | 3.372641 | 2.695366 | 0.007638 | 0.023698 | -2.97619 |
| KCNC4      | -0.64259 | 3.694286 | -2.69498 | 0.007646 | 0.023709 | -3.38096 |
| ROBO4      | -0.7968  | 4.049348 | -2.6951  | 0.007644 | 0.023709 | -3.44625 |
| USP1       | 0.487052 | 5.93725  | 2.695028 | 0.007645 | 0.023709 | -3.52075 |
| DUSP12     | 0.404531 | 3.767745 | 2.694699 | 0.007652 | 0.023723 | -3.21542 |
| KDM3B      | -0.33375 | 6.848949 | -2.69447 | 0.007658 | 0.023734 | -3.56079 |
| MNDA       | 1.427159 | 1.761323 | 2.69438  | 0.007659 | 0.023734 | -2.76569 |
| CDKN2D     | 0.808996 | 3.278656 | 2.69426  | 0.007662 | 0.023737 | -3.05254 |
| CXCL10     | 3.228467 | 3.369101 | 2.693409 | 0.007681 | 0.023775 | -2.76331 |
| TMEM68     | 0.477832 | 4.577606 | 2.693449 | 0.00768  | 0.023775 | -3.36558 |
| ARL3       | -0.46226 | 3.895199 | -2.69351 | 0.007679 | 0.023775 | -3.39236 |
| ZFP36      | -0.95751 | 8.31489  | -2.69349 | 0.007679 | 0.023775 | -3.50649 |
| ZNF703     | 1.096857 | 6.209839 | 2.693246 | 0.007685 | 0.023781 | -3.50093 |
| MTX3       | -0.68035 | 4.823821 | -2.69238 | 0.007704 | 0.023835 | -3.52162 |
| PDE9A      | -1.26272 | 1.439531 | -2.69219 | 0.007708 | 0.023843 | -3.0563  |
| RNASEL     | -0.51948 | 4.00387  | -2.69204 | 0.007711 | 0.023848 | -3.41883 |
| SAMD1      | 0.50887  | 5.118666 | 2.691468 | 0.007724 | 0.02388  | -3.44661 |
| ABHD14B    | -0.64653 | 5.620111 | -2.69136 | 0.007727 | 0.02388  | -3.56568 |
| ACSS2      | -0.69068 | 5.842259 | -2.69135 | 0.007727 | 0.02388  | -3.57133 |
| MDM4       | -0.49579 | 5.791499 | -2.69105 | 0.007734 | 0.023895 | -3.56787 |
| LOC642846  | 0.760226 | 3.376254 | 2.690456 | 0.007747 | 0.023931 | -3.08418 |

|              |          |          |          |          |          |          |
|--------------|----------|----------|----------|----------|----------|----------|
| ZDHHC12      | 0.615456 | 5.676611 | 2.689382 | 0.007771 | 0.024    | -3.50199 |
| KAZALD1      | -1.16785 | 1.355975 | -2.68765 | 0.00781  | 0.024115 | -3.0341  |
| EPB41        | -0.58292 | 5.862681 | -2.68724 | 0.007819 | 0.024138 | -3.5809  |
| TGIF2        | 0.809492 | 4.922985 | 2.686982 | 0.007825 | 0.024151 | -3.39055 |
| SLC26A1      | -0.84563 | 1.607502 | -2.68662 | 0.007833 | 0.024171 | -3.03448 |
| SEC31A       | -0.33734 | 7.941271 | -2.68538 | 0.007861 | 0.024252 | -3.55828 |
| TPRXL        | 3.416507 | 2.050382 | 2.684637 | 0.007878 | 0.024293 | -2.69479 |
| MOB2         | -0.42994 | 4.331436 | -2.68466 | 0.007877 | 0.024293 | -3.46994 |
| BTBD9        | -0.55872 | 4.54199  | -2.68442 | 0.007883 | 0.024303 | -3.50629 |
| H3F3A        | 0.446091 | 7.718295 | 2.677612 | 0.008039 | 0.024779 | -3.60115 |
| RHOBTB1      | -0.88599 | 3.665767 | -2.67681 | 0.008058 | 0.024831 | -3.45168 |
| PRPF31       | 0.345048 | 5.533699 | 2.67656  | 0.008064 | 0.024843 | -3.54551 |
| ARHGEF3      | -0.50804 | 5.017285 | -2.675   | 0.0081   | 0.024949 | -3.56994 |
| C16orf87     | 0.603975 | 2.753512 | 2.674735 | 0.008106 | 0.024963 | -3.04565 |
| SNAPC4       | 0.455861 | 4.619599 | 2.674655 | 0.008108 | 0.024963 | -3.42496 |
| LOC100131193 | -0.69947 | 1.246794 | -2.67435 | 0.008115 | 0.02498  | -2.99133 |
| PPIL6        | -0.78337 | 0.532305 | -2.67404 | 0.008122 | 0.024996 | -2.90432 |
| GOLGA1       | -0.34233 | 5.177907 | -2.67391 | 0.008125 | 0.025    | -3.57401 |
| UACA         | -0.65966 | 5.983641 | -2.6736  | 0.008132 | 0.025017 | -3.61854 |
| FAM45A       | 0.45157  | 3.945492 | 2.671584 | 0.00818  | 0.025157 | -3.30247 |
| C3orf64      | -0.48421 | 5.029274 | -2.67146 | 0.008183 | 0.02516  | -3.57877 |
| SLC7A7       | 1.634418 | 3.848671 | 2.671196 | 0.008189 | 0.025174 | -3.07773 |
| ARMCX3       | -0.79553 | 5.197799 | -2.67093 | 0.008195 | 0.025188 | -3.60716 |
| ZC3H18       | 0.363843 | 5.682767 | 2.670442 | 0.008207 | 0.025217 | -3.5728  |
| C4orf29      | -0.44554 | 3.064698 | -2.66977 | 0.008222 | 0.02526  | -3.28816 |
| MED13L       | -0.48222 | 7.048838 | -2.66954 | 0.008228 | 0.025271 | -3.61891 |
| C15orf44     | 0.371433 | 5.353543 | 2.668765 | 0.008246 | 0.025322 | -3.54523 |
| CD300A       | 1.253723 | 1.544479 | 2.66763  | 0.008273 | 0.025399 | -2.82538 |
| HIATL1       | 0.404794 | 6.543236 | 2.66753  | 0.008276 | 0.025401 | -3.6272  |
| ARAF         | -0.46003 | 6.0394   | -2.66733 | 0.00828  | 0.02541  | -3.63362 |
| SCG2         | -1.36645 | 0.271959 | -2.6668  | 0.008293 | 0.025443 | -2.9559  |
| CHERP        | 0.348038 | 6.682431 | 2.666008 | 0.008312 | 0.025496 | -3.63569 |
| DOK7         | -1.33272 | 0.351098 | -2.66573 | 0.008318 | 0.025505 | -2.964   |
| DNAL1        | -0.49211 | 3.509182 | -2.66578 | 0.008317 | 0.025505 | -3.39953 |
| PDE6D        | 0.444333 | 3.98848  | 2.665441 | 0.008325 | 0.02552  | -3.32813 |
| SOCS6        | -0.61699 | 5.344978 | -2.66525 | 0.00833  | 0.025528 | -3.62155 |
| CYP2C19      | -1.9638  | -0.68162 | -2.66408 | 0.008358 | 0.025604 | -2.90397 |
| KIAA2018     | -0.56022 | 5.919467 | -2.66407 | 0.008358 | 0.025604 | -3.64138 |
| ZNF91        | -1.14791 | 3.914627 | -2.66397 | 0.008361 | 0.025606 | -3.54573 |
| TMEM44       | 0.811247 | 3.765346 | 2.663425 | 0.008374 | 0.02564  | -3.21892 |
| DAPK1        | -1.23348 | 5.152575 | -2.66319 | 0.008379 | 0.025652 | -3.6379  |
| DHRX         | -0.56345 | 3.669112 | -2.6623  | 0.008401 | 0.025711 | -3.44785 |
| SH3D20       | 1.097776 | 2.387754 | 2.662203 | 0.008403 | 0.025713 | -2.95879 |
| TNKS1BP1     | -0.63052 | 7.766219 | -2.6616  | 0.008418 | 0.025751 | -3.61674 |
| DLST         | -0.35928 | 6.255431 | -2.66153 | 0.008419 | 0.025751 | -3.64999 |
| FARSB        | 0.414928 | 5.778069 | 2.661345 | 0.008424 | 0.025759 | -3.60045 |
| TMCO4        | -0.51606 | 4.682746 | -2.66075 | 0.008438 | 0.025798 | -3.5773  |
| ZNF155       | -0.70349 | 2.152823 | -2.65979 | 0.008461 | 0.025863 | -3.17832 |
| ANKMY2       | -0.56324 | 4.517159 | -2.65887 | 0.008484 | 0.025923 | -3.56939 |
| PBRM1        | -0.46059 | 6.247859 | -2.65883 | 0.008484 | 0.025923 | -3.65716 |
| PIK3AP1      | 1.712736 | 4.355895 | 2.658518 | 0.008492 | 0.02594  | -3.18567 |
| RAB25        | 1.319496 | 6.542847 | 2.658005 | 0.008505 | 0.025973 | -3.60184 |
| DUSP10       | 1.071999 | 3.71049  | 2.656686 | 0.008537 | 0.026064 | -3.18192 |
| STK16        | -0.37445 | 4.11485  | -2.65664 | 0.008538 | 0.026064 | -3.50737 |
| SENP1        | 0.429037 | 5.167608 | 2.656415 | 0.008543 | 0.026074 | -3.5512  |
| EDIL3        | -1.15041 | 3.819123 | -2.65619 | 0.008549 | 0.026085 | -3.55496 |
| TOMM6        | 0.596506 | 6.338786 | 2.655778 | 0.008559 | 0.026111 | -3.64154 |
| ERI3         | 0.439975 | 5.394222 | 2.655142 | 0.008575 | 0.026152 | -3.57835 |

|              |          |          |          |          |          |          |
|--------------|----------|----------|----------|----------|----------|----------|
| TCN2         | -0.8173  | 3.66077  | -2.65485 | 0.008582 | 0.026169 | -3.50188 |
| SNX5         | 0.431724 | 6.321682 | 2.654773 | 0.008584 | 0.026169 | -3.65072 |
| FCGR2A       | 1.378008 | 4.769123 | 2.654007 | 0.008602 | 0.02622  | -3.34283 |
| RCN2         | 0.50828  | 6.246243 | 2.653174 | 0.008623 | 0.026277 | -3.64762 |
| PRSS22       | 2.4968   | 4.175208 | 2.652713 | 0.008634 | 0.026306 | -3.05222 |
| PIK3R3       | -0.72393 | 4.753981 | -2.65254 | 0.008639 | 0.026313 | -3.62159 |
| SPAG16       | -0.84623 | 3.131353 | -2.65208 | 0.00865  | 0.026338 | -3.42332 |
| AP1G2        | 0.542483 | 6.29364  | 2.652062 | 0.00865  | 0.026338 | -3.65111 |
| CHN1         | 1.061128 | 3.542567 | 2.649862 | 0.008705 | 0.026498 | -3.17147 |
| THUMPD2      | 0.409747 | 3.563112 | 2.649594 | 0.008712 | 0.026512 | -3.28702 |
| LOC144571    | -0.78099 | 0.527453 | -2.64887 | 0.00873  | 0.026561 | -2.96743 |
| RPS6KA1      | 0.6464   | 6.051038 | 2.648782 | 0.008732 | 0.026562 | -3.63677 |
| DAGLB        | 0.439433 | 4.693954 | 2.648601 | 0.008736 | 0.02657  | -3.5067  |
| CIB2         | 1.227932 | 2.380291 | 2.647957 | 0.008752 | 0.026613 | -2.97673 |
| FAM96A       | 0.448182 | 4.919544 | 2.647805 | 0.008756 | 0.026619 | -3.53908 |
| MARK2        | 0.430008 | 6.513866 | 2.646871 | 0.00878  | 0.026679 | -3.67847 |
| KIF21A       | -0.57696 | 5.686271 | -2.6469  | 0.008779 | 0.026679 | -3.68037 |
| TIGIT        | 1.629242 | 0.742398 | 2.646496 | 0.008789 | 0.026696 | -2.78376 |
| SC65         | 1.143269 | 4.863459 | 2.646493 | 0.008789 | 0.026696 | -3.42389 |
| MTF2         | 0.403736 | 4.629779 | 2.645983 | 0.008802 | 0.026723 | -3.50793 |
| PSMD7        | 0.377877 | 6.625524 | 2.646033 | 0.008801 | 0.026723 | -3.68505 |
| GYLTL1B      | 1.936819 | 4.768961 | 2.645378 | 0.008817 | 0.026763 | -3.2535  |
| H6PD         | -0.54654 | 7.142504 | -2.64521 | 0.008821 | 0.02677  | -3.67797 |
| MED27        | 0.533746 | 3.612947 | 2.644711 | 0.008834 | 0.026803 | -3.28772 |
| FAM113B      | 1.123614 | 2.931104 | 2.644542 | 0.008838 | 0.02681  | -3.07802 |
| ZNF608       | -0.98898 | 3.361061 | -2.64352 | 0.008864 | 0.026882 | -3.50631 |
| TOR2A        | 0.602456 | 4.218832 | 2.642312 | 0.008894 | 0.026965 | -3.40221 |
| ORC3L        | 0.462152 | 4.755605 | 2.64229  | 0.008895 | 0.026965 | -3.52908 |
| ZNF585B      | -1.04405 | 1.120392 | -2.64221 | 0.008897 | 0.026965 | -3.09998 |
| COL1A2       | 1.229746 | 10.23449 | 2.641847 | 0.008906 | 0.026987 | -3.63974 |
| FAM26F       | 1.647562 | 1.058799 | 2.640791 | 0.008933 | 0.027063 | -2.80854 |
| TARBP2       | 0.460763 | 3.70653  | 2.640526 | 0.00894  | 0.027077 | -3.32973 |
| TOMM22       | 0.442233 | 5.271243 | 2.639498 | 0.008966 | 0.027151 | -3.60458 |
| SAA1         | 3.754457 | 2.606814 | 2.638865 | 0.008982 | 0.027194 | -2.80783 |
| TRIM15       | 3.839361 | 0.274484 | 2.638689 | 0.008987 | 0.027202 | -2.8014  |
| SHPRH        | -0.41601 | 4.626706 | -2.63857 | 0.00899  | 0.027205 | -3.61963 |
| DDX6         | -0.34674 | 7.111888 | -2.638   | 0.009005 | 0.027244 | -3.7008  |
| ZNF628       | 0.38777  | 4.044701 | 2.637343 | 0.009021 | 0.027288 | -3.42305 |
| MMP3         | 4.815102 | 3.677048 | 2.637152 | 0.009026 | 0.027297 | -2.81404 |
| FGFR1OP      | 0.610103 | 3.324224 | 2.636468 | 0.009044 | 0.027345 | -3.2361  |
| NEB          | 2.876785 | 2.568998 | 2.635325 | 0.009073 | 0.027428 | -2.85773 |
| EBP          | 0.712911 | 5.009777 | 2.634906 | 0.009084 | 0.027454 | -3.55158 |
| PHB          | 0.442682 | 6.83642  | 2.63437  | 0.009098 | 0.02749  | -3.71756 |
| LOC100288778 | -0.59652 | 3.853129 | -2.63395 | 0.009109 | 0.027518 | -3.55601 |
| RANBP6       | -0.44322 | 4.656409 | -2.63329 | 0.009126 | 0.027563 | -3.63884 |
| CCDC142      | 0.468908 | 3.319623 | 2.633081 | 0.009131 | 0.027573 | -3.26949 |
| FAM132A      | 1.905244 | 0.302758 | 2.631307 | 0.009177 | 0.027707 | -2.81891 |
| METTL13      | 0.370234 | 5.14366  | 2.631106 | 0.009183 | 0.027713 | -3.61844 |
| RDX          | -0.89219 | 5.858834 | -2.63108 | 0.009183 | 0.027713 | -3.72715 |
| C12orf52     | 0.433283 | 4.364641 | 2.630884 | 0.009188 | 0.027722 | -3.49476 |
| ADAM8        | 1.610271 | 4.381699 | 2.630788 | 0.009191 | 0.027724 | -3.27737 |
| EBPL         | 0.697452 | 4.527469 | 2.630579 | 0.009196 | 0.027734 | -3.48081 |
| ATP2A3       | -1.43272 | 5.820311 | -2.63033 | 0.009203 | 0.027747 | -3.724   |
| SH3YL1       | -0.76126 | 5.181506 | -2.62958 | 0.009223 | 0.027801 | -3.71033 |
| MON1B        | -0.32962 | 5.790166 | -2.62811 | 0.009261 | 0.027912 | -3.72476 |
| SNHG9        | -0.78745 | 0.119888 | -2.62786 | 0.009268 | 0.027925 | -2.96764 |
| CLEC7A       | 1.841771 | 2.773766 | 2.627736 | 0.009271 | 0.027929 | -3.00879 |
| FKBP3        | 0.47982  | 5.453579 | 2.627618 | 0.009274 | 0.027932 | -3.65071 |

|          |          |          |          |          |          |          |
|----------|----------|----------|----------|----------|----------|----------|
| POU6F2   | 2.586612 | -0.64486 | 2.627182 | 0.009286 | 0.027955 | -2.82501 |
| PCLO     | -1.76933 | 2.736978 | -2.62718 | 0.009286 | 0.027955 | -3.55379 |
| ALOX15B  | -1.62866 | 1.452028 | -2.62702 | 0.00929  | 0.027957 | -3.28041 |
| VTI1B    | -0.38345 | 5.346255 | -2.627   | 0.00929  | 0.027957 | -3.70812 |
| TCP1     | 0.429042 | 7.6293   | 2.62645  | 0.009305 | 0.027995 | -3.73334 |
| ETV6     | 0.480879 | 6.215559 | 2.626175 | 0.009312 | 0.02801  | -3.71596 |
| SLC35C2  | 0.364673 | 5.582947 | 2.625443 | 0.009331 | 0.028063 | -3.67871 |
| DUSP2    | 1.180561 | 2.854929 | 2.624742 | 0.00935  | 0.028112 | -3.11017 |
| CLIC4    | -0.74728 | 7.661727 | -2.62467 | 0.009352 | 0.028112 | -3.71083 |
| PDE4A    | -0.74926 | 4.449426 | -2.62436 | 0.00936  | 0.028131 | -3.66662 |
| C9orf30  | 0.70623  | 4.143424 | 2.623363 | 0.009387 | 0.028204 | -3.41934 |
| EIF5A2   | -0.77333 | 4.180441 | -2.62305 | 0.009395 | 0.028223 | -3.64316 |
| CFH      | -0.9981  | 5.599818 | -2.62285 | 0.0094   | 0.028233 | -3.74642 |
| NAA38    | 0.500749 | 4.464094 | 2.622597 | 0.009407 | 0.028247 | -3.52257 |
| MED20    | 0.563954 | 4.621895 | 2.622432 | 0.009411 | 0.028255 | -3.54159 |
| AP1B1    | -0.42846 | 7.485925 | -2.62168 | 0.009432 | 0.028309 | -3.732   |
| ZNF256   | -1.16226 | 1.061184 | -2.62072 | 0.009457 | 0.02838  | -3.16231 |
| SLC39A8  | 1.145873 | 4.454079 | 2.619718 | 0.009484 | 0.028454 | -3.40663 |
| ZNF808   | -0.88991 | 3.460266 | -2.61951 | 0.00949  | 0.028465 | -3.56942 |
| WDR66    | 3.109853 | 2.64941  | 2.618687 | 0.009512 | 0.028503 | -2.8859  |
| HACL1    | -0.48318 | 3.803132 | -2.61888 | 0.009506 | 0.028503 | -3.56999 |
| BPNT1    | 0.537189 | 4.799283 | 2.618684 | 0.009512 | 0.028503 | -3.58451 |
| C16orf53 | 0.46603  | 4.935135 | 2.618659 | 0.009513 | 0.028503 | -3.61352 |
| TXNDC11  | -0.43025 | 5.686218 | -2.61867 | 0.009512 | 0.028503 | -3.74797 |
| ZFYVE1   | -0.45848 | 4.708462 | -2.6185  | 0.009517 | 0.02851  | -3.68287 |
| TLE4     | -0.85396 | 4.835851 | -2.61829 | 0.009522 | 0.02852  | -3.72316 |
| PHF2     | -0.38563 | 5.886125 | -2.6179  | 0.009533 | 0.028546 | -3.7551  |
| SNHG12   | 0.709799 | 3.546614 | 2.617714 | 0.009538 | 0.028555 | -3.31051 |
| PDCD6IP  | -0.46443 | 7.645087 | -2.61744 | 0.009546 | 0.028571 | -3.7374  |
| PICK1    | -0.37678 | 4.078281 | -2.61726 | 0.00955  | 0.028579 | -3.60208 |
| NOL10    | 0.376688 | 5.489095 | 2.617006 | 0.009557 | 0.028594 | -3.69022 |
| GORASP2  | 0.329808 | 7.203093 | 2.616752 | 0.009564 | 0.028608 | -3.76306 |
| SEMA3D   | -1.73821 | 1.018798 | -2.61638 | 0.009574 | 0.028632 | -3.24482 |
| QPCT     | 1.828748 | 2.270696 | 2.616164 | 0.00958  | 0.028637 | -2.97462 |
| RHBDD2   | 0.467844 | 6.866698 | 2.616204 | 0.009579 | 0.028637 | -3.76365 |
| IFIT2    | 1.508141 | 3.472417 | 2.615322 | 0.009603 | 0.028693 | -3.17946 |
| CAMLG    | -0.35654 | 4.414753 | -2.61538 | 0.009601 | 0.028693 | -3.64911 |
| LOC80154 | -0.68724 | 5.312315 | -2.6152  | 0.009606 | 0.028697 | -3.75011 |
| MAN2A2   | -0.67695 | 5.928913 | -2.61448 | 0.009626 | 0.028749 | -3.76889 |
| SF3A3    | 0.395074 | 6.144732 | 2.613932 | 0.009641 | 0.028788 | -3.74747 |
| ARFGAP2  | -0.3126  | 6.111294 | -2.61369 | 0.009647 | 0.028801 | -3.76933 |
| HACE1    | -0.48122 | 3.971123 | -2.61348 | 0.009653 | 0.028813 | -3.61099 |
| SRGAP2   | 0.463217 | 5.572483 | 2.613266 | 0.009659 | 0.028824 | -3.70043 |
| ATF7IP   | 0.489633 | 6.476616 | 2.61255  | 0.009678 | 0.028876 | -3.76218 |
| ASAP1    | 0.586307 | 6.062341 | 2.612119 | 0.00969  | 0.028905 | -3.73545 |
| C11orf74 | -0.49637 | 2.195309 | -2.61185 | 0.009697 | 0.028921 | -3.27206 |
| TNK2     | 0.644051 | 6.379079 | 2.611379 | 0.00971  | 0.028953 | -3.75408 |
| MEIS1    | -0.81447 | 3.884919 | -2.61114 | 0.009717 | 0.028967 | -3.64421 |
| ALDH9A1  | -0.52689 | 6.206336 | -2.61043 | 0.009737 | 0.029019 | -3.78015 |
| FBXL3    | -0.37798 | 6.020616 | -2.61014 | 0.009745 | 0.029036 | -3.77765 |
| S100A14  | 1.86681  | 6.964752 | 2.609881 | 0.009752 | 0.029051 | -3.71667 |
| ZNF451   | -0.37468 | 5.248986 | -2.60866 | 0.009785 | 0.029145 | -3.74741 |
| PNRC1    | -0.63344 | 6.971427 | -2.60846 | 0.009791 | 0.029156 | -3.77314 |
| ZNF187   | -0.47841 | 3.009372 | -2.60827 | 0.009796 | 0.029158 | -3.44057 |
| TRAPPC9  | -0.4507  | 5.743405 | -2.60831 | 0.009795 | 0.029158 | -3.77672 |
| ANAPC1   | 0.499685 | 5.935626 | 2.607238 | 0.009825 | 0.029237 | -3.74406 |
| TAGLN2   | 0.480393 | 9.430578 | 2.606409 | 0.009848 | 0.0293   | -3.73408 |
| PXDN     | 1.104301 | 6.457617 | 2.605906 | 0.009862 | 0.029335 | -3.7442  |

|          |          |          |          |          |          |          |
|----------|----------|----------|----------|----------|----------|----------|
| ANKRD44  | -0.8502  | 1.970428 | -2.60572 | 0.009867 | 0.029344 | -3.30436 |
| TMED10P1 | -0.50189 | 1.458032 | -2.60507 | 0.009885 | 0.029392 | -3.17022 |
| JOSD1    | 0.417774 | 6.49439  | 2.604869 | 0.00989  | 0.029402 | -3.78458 |
| PTER     | -0.65161 | 4.423117 | -2.6033  | 0.009934 | 0.029526 | -3.70805 |
| USP30    | -0.39465 | 3.848531 | -2.60312 | 0.009939 | 0.029534 | -3.60487 |
| AP2A2    | -0.35504 | 6.379542 | -2.60277 | 0.009949 | 0.029557 | -3.7996  |
| CTU1     | 0.519419 | 3.378055 | 2.60235  | 0.009961 | 0.02958  | -3.34911 |
| C2orf67  | -0.56496 | 4.353366 | -2.60236 | 0.009961 | 0.02958  | -3.69539 |
| KLRA1    | -0.72996 | 0.596677 | -2.60207 | 0.009969 | 0.029597 | -3.08431 |
| DDX47    | 0.412467 | 5.641385 | 2.60089  | 0.010002 | 0.029689 | -3.74206 |
| CLEC4A   | 1.053233 | 0.304799 | 2.600755 | 0.010006 | 0.029691 | -2.8922  |
| POLE     | 0.47157  | 6.29593  | 2.600716 | 0.010007 | 0.029691 | -3.78476 |
| C18orf1  | -0.97409 | 3.938554 | -2.5996  | 0.010038 | 0.029778 | -3.69535 |
| C8orf30A | 0.569621 | 5.302214 | 2.599492 | 0.010041 | 0.029781 | -3.69558 |
| IL2RA    | 1.525877 | 1.473865 | 2.597729 | 0.010091 | 0.029923 | -2.96298 |
| ENTPD4   | -0.47431 | 4.655298 | -2.59751 | 0.010098 | 0.029935 | -3.73133 |
| SYTL5    | -1.72107 | 0.934029 | -2.59726 | 0.010105 | 0.02995  | -3.26847 |
| C1orf163 | 0.483711 | 3.538967 | 2.596928 | 0.010114 | 0.029971 | -3.40062 |
| EPHA7    | -1.83921 | 0.667011 | -2.5966  | 0.010123 | 0.029986 | -3.25224 |
| FLJ10038 | -0.45242 | 3.035941 | -2.59663 | 0.010123 | 0.029986 | -3.47113 |
| KLF4     | -1.03362 | 6.825371 | -2.5965  | 0.010126 | 0.029989 | -3.79824 |
| ZNF146   | 0.435349 | 6.712902 | 2.595979 | 0.010141 | 0.030026 | -3.81235 |
| KIAA1279 | -0.34241 | 5.031401 | -2.59555 | 0.010153 | 0.030056 | -3.76099 |
| ANKRD9   | -0.56335 | 4.584776 | -2.59538 | 0.010158 | 0.030064 | -3.73722 |
| SCAMP1   | -0.42962 | 6.175327 | -2.59507 | 0.010167 | 0.030084 | -3.81831 |
| ZKSCAN2  | -0.49059 | 2.847204 | -2.59393 | 0.0102   | 0.030174 | -3.44484 |
| ZNF524   | -0.48717 | 3.925304 | -2.59328 | 0.010218 | 0.030222 | -3.65305 |
| TRAF6    | -0.36966 | 3.670018 | -2.59219 | 0.01025  | 0.030305 | -3.59561 |
| ZDBF2    | -1.10902 | 3.353839 | -2.59209 | 0.010253 | 0.030305 | -3.65332 |
| PTPN1    | 0.39105  | 6.49868  | 2.592093 | 0.010253 | 0.030305 | -3.81757 |
| CDK12    | 0.52401  | 6.718096 | 2.591898 | 0.010258 | 0.030315 | -3.82072 |
| ODC1     | 1.058771 | 7.651029 | 2.591716 | 0.010263 | 0.030324 | -3.82632 |
| WDR6     | -0.46543 | 6.559767 | -2.59129 | 0.010276 | 0.030353 | -3.82623 |
| GPSM1    | -0.85774 | 3.600561 | -2.59067 | 0.010294 | 0.0304   | -3.66062 |
| C12orf23 | -0.57251 | 5.478884 | -2.58985 | 0.010317 | 0.030464 | -3.81698 |
| SLAMF8   | 1.394706 | 3.403322 | 2.588514 | 0.010356 | 0.030559 | -3.25195 |
| KLHDC8B  | -0.69999 | 3.203211 | -2.58861 | 0.010353 | 0.030559 | -3.57262 |
| C9orf91  | -0.51891 | 4.476655 | -2.58852 | 0.010356 | 0.030559 | -3.73939 |
| MKRN2    | -0.34622 | 4.63052  | -2.58756 | 0.010384 | 0.030634 | -3.74224 |
| SULF1    | 1.383656 | 6.603721 | 2.58742  | 0.010388 | 0.03064  | -3.7809  |
| MUTYH    | 0.577879 | 3.373849 | 2.587172 | 0.010395 | 0.030648 | -3.37437 |
| WASL     | -0.40118 | 6.691543 | -2.58719 | 0.010395 | 0.030648 | -3.8355  |
| ARC      | -1.33976 | 0.24985  | -2.58697 | 0.010401 | 0.030654 | -3.15049 |
| RBM45    | 0.25439  | 2.792164 | 2.586952 | 0.010402 | 0.030654 | -3.32152 |
| CXXC1    | -0.40116 | 4.977711 | -2.58667 | 0.01041  | 0.030672 | -3.78301 |
| RASA4    | -0.67917 | 3.594945 | -2.58654 | 0.010414 | 0.030676 | -3.64642 |
| RCOR3    | -0.40131 | 5.29619  | -2.58632 | 0.01042  | 0.030689 | -3.80847 |
| AUP1     | 0.371482 | 6.875725 | 2.585986 | 0.01043  | 0.030711 | -3.84076 |
| PTGFR    | -1.13909 | 0.383454 | -2.58558 | 0.010442 | 0.03074  | -3.14671 |
| PLK2     | 0.959383 | 5.26235  | 2.585452 | 0.010445 | 0.030744 | -3.68118 |
| TARBP1   | 0.554602 | 5.55042  | 2.58477  | 0.010465 | 0.030797 | -3.76094 |
| KIAA0562 | -0.31359 | 5.381623 | -2.58453 | 0.010472 | 0.030811 | -3.81342 |
| NHLRC2   | -0.45358 | 3.946496 | -2.58338 | 0.010506 | 0.030904 | -3.67731 |
| CHML     | 0.795979 | 4.938173 | 2.583213 | 0.010511 | 0.030912 | -3.65811 |
| FZD6     | 0.950604 | 6.512223 | 2.583094 | 0.010515 | 0.030916 | -3.81576 |
| WRNIP1   | 0.430582 | 5.882638 | 2.582527 | 0.010531 | 0.030958 | -3.80675 |
| CBY1     | -0.41734 | 3.636677 | -2.58245 | 0.010534 | 0.030958 | -3.62193 |
| GRB2     | 0.331515 | 6.769422 | 2.581899 | 0.01055  | 0.031    | -3.85027 |

|           |          |          |          |          |          |          |
|-----------|----------|----------|----------|----------|----------|----------|
| MYO18A    | -0.59464 | 7.06576  | -2.58166 | 0.010557 | 0.031014 | -3.83896 |
| HIBCH     | -0.49685 | 4.320442 | -2.58077 | 0.010583 | 0.031085 | -3.73825 |
| ZNF684    | -0.52967 | 1.400402 | -2.58049 | 0.010592 | 0.031103 | -3.22568 |
| TECR      | 0.615608 | 6.696414 | 2.580021 | 0.010606 | 0.031137 | -3.8473  |
| A2M       | -1.0947  | 8.508871 | -2.57961 | 0.010618 | 0.031167 | -3.78537 |
| LOC728643 | 1.961601 | 0.633868 | 2.578197 | 0.01066  | 0.031277 | -2.94704 |
| BAD       | -0.44953 | 4.679875 | -2.57825 | 0.010658 | 0.031277 | -3.77972 |
| PDZD11    | 0.502209 | 5.163963 | 2.577879 | 0.010669 | 0.031298 | -3.74084 |
| CTDSPL2   | 0.424652 | 5.530197 | 2.577455 | 0.010682 | 0.031328 | -3.78905 |
| GSTM3     | -1.58192 | 4.888525 | -2.57735 | 0.010685 | 0.031331 | -3.8542  |
| C1orf159  | 0.529937 | 3.769417 | 2.577025 | 0.010695 | 0.031353 | -3.48807 |
| C9orf110  | 1.293288 | 1.202705 | 2.576321 | 0.010716 | 0.031408 | -3.006   |
| FLNA      | -1.1418  | 10.4082  | -2.57575 | 0.010733 | 0.031452 | -3.72906 |
| PAPD4     | -0.30142 | 5.342494 | -2.57482 | 0.010761 | 0.031527 | -3.83419 |
| C11orf31  | 0.5213   | 4.831582 | 2.574321 | 0.010776 | 0.031559 | -3.70333 |
| SDHA      | -0.51697 | 7.03115  | -2.57431 | 0.010776 | 0.031559 | -3.8595  |
| HK3       | 1.578415 | 0.706912 | 2.573774 | 0.010792 | 0.031599 | -2.95768 |
| SPSB2     | 0.606505 | 2.830893 | 2.573236 | 0.010809 | 0.03163  | -3.3086  |
| MBD4      | 0.429609 | 5.084857 | 2.573202 | 0.01081  | 0.03163  | -3.75062 |
| GNPTAB    | -0.39684 | 6.056911 | -2.57324 | 0.010809 | 0.03163  | -3.87096 |
| AMOTL2    | -0.60804 | 6.095784 | -2.57292 | 0.010818 | 0.031648 | -3.87376 |
| GOLGA6L9  | -0.58623 | 3.522671 | -2.57281 | 0.010821 | 0.031651 | -3.64983 |
| RRP8      | -0.36167 | 3.211072 | -2.57236 | 0.010835 | 0.031685 | -3.54896 |
| ADCY7     | 0.764715 | 5.35451  | 2.572043 | 0.010845 | 0.031706 | -3.74969 |
| FBXO42    | -0.3341  | 4.9531   | -2.57182 | 0.010851 | 0.031719 | -3.81263 |
| ACVRL1    | -0.77026 | 3.681484 | -2.57147 | 0.010862 | 0.031744 | -3.70829 |
| CPSF6     | 0.418903 | 6.583387 | 2.57123  | 0.010869 | 0.031758 | -3.87134 |
| SPON2     | 0.986592 | 5.346687 | 2.569996 | 0.010907 | 0.031854 | -3.72663 |
| ABCB7     | -0.33497 | 4.44889  | -2.57004 | 0.010906 | 0.031854 | -3.76398 |
| KCTD10    | -0.43043 | 6.088759 | -2.56993 | 0.010909 | 0.031854 | -3.88007 |
| ATP6AP2   | 0.382145 | 6.981431 | 2.56815  | 0.010963 | 0.032006 | -3.88579 |
| DGKG      | -1.35999 | 1.908982 | -2.56774 | 0.010976 | 0.032035 | -3.47835 |
| MAVS      | -0.45912 | 7.729411 | -2.5676  | 0.01098  | 0.032041 | -3.85975 |
| ZNF192    | -0.55771 | 4.658187 | -2.56745 | 0.010985 | 0.032048 | -3.81415 |
| DDHD2     | -0.50021 | 5.3459   | -2.56705 | 0.010997 | 0.032077 | -3.86448 |
| UBR3      | -0.35593 | 6.165698 | -2.56658 | 0.011011 | 0.032112 | -3.88858 |
| HSPH1     | 0.65502  | 7.572473 | 2.566507 | 0.011014 | 0.032112 | -3.88765 |
| MYL5      | -0.54134 | 2.179318 | -2.56584 | 0.011034 | 0.032166 | -3.39009 |
| C6orf27   | -1.04112 | 1.971358 | -2.56472 | 0.011069 | 0.032259 | -3.43119 |
| SLC20A1   | 0.569902 | 6.048343 | 2.564518 | 0.011075 | 0.032271 | -3.8542  |
| BTBD7     | -0.38467 | 5.818573 | -2.56368 | 0.011101 | 0.03234  | -3.88878 |
| FOXL1     | 1.67279  | 1.866048 | 2.563066 | 0.01112  | 0.032388 | -3.07051 |
| MMP24     | -0.62055 | 3.085875 | -2.56279 | 0.011128 | 0.032406 | -3.59352 |
| ITGA3     | 0.880958 | 8.298974 | 2.562433 | 0.011139 | 0.032432 | -3.88807 |
| ERF       | 0.509829 | 5.973551 | 2.562173 | 0.011147 | 0.032448 | -3.85875 |
| HMBS      | 0.684877 | 4.025359 | 2.562056 | 0.011151 | 0.032452 | -3.54865 |
| NAGLU     | -0.43841 | 5.054846 | -2.56171 | 0.011162 | 0.032477 | -3.85391 |
| PPME1     | 0.569059 | 6.237861 | 2.561487 | 0.011169 | 0.03249  | -3.87465 |
| LOC441089 | 0.557028 | 2.632599 | 2.560552 | 0.011198 | 0.032561 | -3.31635 |
| INPP5K    | -0.38431 | 4.963584 | -2.5606  | 0.011196 | 0.032561 | -3.84517 |
| PCDHB15   | -0.88304 | 0.70824  | -2.56003 | 0.011214 | 0.032602 | -3.22285 |
| SNHG10    | 0.544955 | 1.634634 | 2.559117 | 0.011243 | 0.032678 | -3.17663 |
| TAF1B     | 0.525625 | 4.009059 | 2.558929 | 0.011249 | 0.032688 | -3.58574 |
| SLC25A30  | -0.43433 | 3.447778 | -2.55811 | 0.011274 | 0.032756 | -3.64708 |
| TOPORS    | -0.42907 | 5.085035 | -2.55797 | 0.011279 | 0.032762 | -3.86532 |
| NDRG3     | 0.441774 | 5.679636 | 2.557576 | 0.011291 | 0.032791 | -3.8508  |
| CYP4F12   | -1.63247 | 1.291776 | -2.55745 | 0.011295 | 0.032796 | -3.42095 |
| DDX42     | -0.27317 | 6.859471 | -2.55735 | 0.011298 | 0.032798 | -3.90887 |

|              |          |          |          |          |          |          |
|--------------|----------|----------|----------|----------|----------|----------|
| MRRF         | 0.478205 | 5.123577 | 2.55702  | 0.011308 | 0.032821 | -3.78983 |
| UQCRB        | -0.44684 | 6.556544 | -2.55665 | 0.01132  | 0.032848 | -3.91265 |
| PIAS2        | -0.51865 | 3.531141 | -2.55648 | 0.011325 | 0.032851 | -3.68325 |
| FER1L4       | -1.4772  | 2.880214 | -2.55647 | 0.011326 | 0.032851 | -3.70472 |
| GOLGA6L5     | -0.6516  | 0.712337 | -2.55619 | 0.011335 | 0.032866 | -3.20232 |
| MALL         | 1.413178 | 6.838292 | 2.556161 | 0.011335 | 0.032866 | -3.87565 |
| LOC100270710 | 1.359275 | 1.702352 | 2.555942 | 0.011342 | 0.032879 | -3.1049  |
| DOPEY1       | -0.49067 | 5.297962 | -2.55412 | 0.0114   | 0.033039 | -3.89309 |
| WNT5A        | 1.352761 | 5.815627 | 2.553766 | 0.011411 | 0.033065 | -3.78619 |
| EMR2         | 1.281235 | 2.843506 | 2.553686 | 0.011414 | 0.033065 | -3.26792 |
| TRIAP1       | 0.408784 | 4.094548 | 2.553529 | 0.011419 | 0.033073 | -3.63712 |
| ZXDA         | -0.6239  | 1.672592 | -2.55342 | 0.011422 | 0.033076 | -3.34661 |
| PHLDB1       | -0.62905 | 5.406806 | -2.55323 | 0.011428 | 0.033086 | -3.90699 |
| SEMA4B       | 0.780085 | 8.102137 | 2.55294  | 0.011437 | 0.033106 | -3.91385 |
| TOX4         | -0.32672 | 6.214706 | -2.55255 | 0.01145  | 0.033135 | -3.92356 |
| SLC25A6      | -0.63563 | 8.408268 | -2.55185 | 0.011472 | 0.033184 | -3.87094 |
| C15orf39     | 0.464161 | 6.219234 | 2.551796 | 0.011474 | 0.033184 | -3.90298 |
| TBL1X        | -0.76101 | 5.395388 | -2.55183 | 0.011473 | 0.033184 | -3.91438 |
| SOX9         | 1.194768 | 7.26073  | 2.551117 | 0.011495 | 0.03324  | -3.91886 |
| RABGAP1      | -0.42117 | 6.101706 | -2.55104 | 0.011498 | 0.03324  | -3.92687 |
| LATS2        | -0.56337 | 5.274919 | -2.5509  | 0.011502 | 0.033246 | -3.90346 |
| PLEKHG2      | 0.632777 | 5.628492 | 2.550668 | 0.01151  | 0.03326  | -3.84608 |
| C14orf45     | -0.6023  | 1.935989 | -2.54983 | 0.011537 | 0.033331 | -3.3964  |
| C9orf40      | 0.689818 | 2.810478 | 2.549339 | 0.011552 | 0.03337  | -3.35225 |
| KBTBD2       | 0.33433  | 6.042018 | 2.54924  | 0.011555 | 0.033372 | -3.90596 |
| ACTC1        | -1.66621 | 0.184983 | -2.54901 | 0.011563 | 0.033386 | -3.27442 |
| MAP2K4       | -0.44761 | 5.435988 | -2.54875 | 0.011571 | 0.033404 | -3.91206 |
| NME2P1       | 0.705677 | 1.557743 | 2.548356 | 0.011584 | 0.033433 | -3.17453 |
| MID1IP1      | -0.54584 | 5.610307 | -2.54792 | 0.011598 | 0.033467 | -3.92526 |
| NYNRIN       | -0.94934 | 5.269456 | -2.54687 | 0.011632 | 0.033557 | -3.92745 |
| ST3GAL1      | -0.88022 | 6.075693 | -2.54592 | 0.011662 | 0.033639 | -3.93936 |
| EBF4         | -0.88931 | 3.088429 | -2.5452  | 0.011686 | 0.033699 | -3.68993 |
| HLA-F        | 1.203963 | 5.90178  | 2.545125 | 0.011688 | 0.033699 | -3.83211 |
| TUBA4A       | 0.92866  | 6.787982 | 2.544852 | 0.011697 | 0.033718 | -3.92677 |
| MAPKAP1      | -0.32833 | 6.27918  | -2.54457 | 0.011706 | 0.033737 | -3.94389 |
| SAMHD1       | -0.78163 | 5.665543 | -2.54285 | 0.011762 | 0.033887 | -3.94453 |
| THOC2        | 0.430623 | 6.754113 | 2.542817 | 0.011763 | 0.033887 | -3.94523 |
| OGFOD1       | 0.348207 | 5.285363 | 2.542584 | 0.011771 | 0.033902 | -3.8578  |
| RAET1L       | 2.640978 | 0.715798 | 2.542336 | 0.011779 | 0.033918 | -3.03179 |
| C13orf1      | -0.46759 | 4.068376 | -2.54214 | 0.011785 | 0.03393  | -3.79885 |
| TP53I13      | 0.505143 | 4.722122 | 2.541893 | 0.011793 | 0.033946 | -3.76829 |
| HDAC4        | -0.58172 | 5.330519 | -2.5417  | 0.011799 | 0.033957 | -3.92987 |
| PPP3R1       | 0.29229  | 6.278932 | 2.541222 | 0.011815 | 0.033995 | -3.93912 |
| NAP1L2       | -1.48353 | 0.139922 | -2.54099 | 0.011823 | 0.034003 | -3.26464 |
| OSBPL7       | -1.0701  | 3.855534 | -2.54103 | 0.011821 | 0.034003 | -3.83695 |
| HES4         | 1.180781 | 3.632067 | 2.540107 | 0.011852 | 0.034072 | -3.43995 |
| VRK2         | 0.430169 | 4.693703 | 2.540132 | 0.011851 | 0.034072 | -3.77952 |
| TTLL5        | 0.359539 | 5.318171 | 2.539734 | 0.011864 | 0.0341   | -3.86697 |
| SPDEF        | -2.11327 | 0.745893 | -2.53953 | 0.011871 | 0.034105 | -3.42943 |
| DUSP14       | 0.87032  | 4.609983 | 2.539548 | 0.01187  | 0.034105 | -3.69561 |
| ANXA2P1      | 1.106378 | 3.154659 | 2.538735 | 0.011897 | 0.034174 | -3.37259 |
| TIMM50       | 0.44231  | 5.267063 | 2.538331 | 0.01191  | 0.034205 | -3.85667 |
| DBR1         | 0.526373 | 4.543643 | 2.53777  | 0.011928 | 0.034251 | -3.74315 |
| TMEM216      | 0.557256 | 3.419972 | 2.537572 | 0.011935 | 0.034261 | -3.50885 |
| LAPTM5       | 0.985033 | 6.367777 | 2.537517 | 0.011937 | 0.034261 | -3.91583 |
| CYLD         | -0.51313 | 5.679096 | -2.53721 | 0.011947 | 0.034283 | -3.95309 |
| ATF6B        | 0.417827 | 6.635486 | 2.535957 | 0.011988 | 0.034395 | -3.95975 |
| MFN2         | -0.47433 | 7.135338 | -2.53549 | 0.012004 | 0.034432 | -3.95397 |



|          |          |          |          |          |          |          |
|----------|----------|----------|----------|----------|----------|----------|
| SETD3    | -0.33361 | 5.731987 | -2.53503 | 0.012019 | 0.034468 | -3.95479 |
| PCBP4    | -0.5365  | 4.47922  | -2.53403 | 0.012052 | 0.03455  | -3.87533 |
| TBC1D2B  | -0.42717 | 5.833666 | -2.53407 | 0.012051 | 0.03455  | -3.96321 |
| TMTC1    | -1.21708 | 4.269843 | -2.53371 | 0.012063 | 0.034573 | -3.91325 |
| TMF1     | -0.52823 | 5.843187 | -2.53341 | 0.012073 | 0.034595 | -3.96717 |
| IL2RB    | 1.313711 | 3.921658 | 2.532868 | 0.012091 | 0.034639 | -3.48656 |
| OPA3     | -0.32299 | 4.90378  | -2.5324  | 0.012107 | 0.034677 | -3.90415 |
| STC2     | 1.978955 | 3.489354 | 2.53197  | 0.012121 | 0.034711 | -3.32202 |
| UBR1     | -0.42099 | 5.473179 | -2.53142 | 0.012139 | 0.034753 | -3.9552  |
| SDHD     | -0.44734 | 6.360693 | -2.53139 | 0.012141 | 0.034753 | -3.97641 |
| EFCAB2   | -0.73298 | 1.895154 | -2.53087 | 0.012158 | 0.034795 | -3.45258 |
| SNORD1C  | 0.69848  | 1.310342 | 2.530622 | 0.012166 | 0.03481  | -3.18666 |
| ISCA1    | -0.38824 | 4.662305 | -2.53057 | 0.012168 | 0.03481  | -3.89023 |
| VPS4A    | -0.34802 | 6.110095 | -2.53048 | 0.012171 | 0.034811 | -3.97663 |
| DSP      | 1.23671  | 10.34628 | 2.529536 | 0.012203 | 0.034895 | -3.91635 |
| ARL5B    | 0.622994 | 5.203199 | 2.529442 | 0.012206 | 0.034897 | -3.85156 |
| SEC22B   | -0.44865 | 5.095036 | -2.52889 | 0.012225 | 0.034943 | -3.93866 |
| HRH1     | 1.001385 | 3.896066 | 2.528457 | 0.012239 | 0.03497  | -3.54955 |
| FARP2    | -0.58318 | 4.671062 | -2.52847 | 0.012239 | 0.03497  | -3.91265 |
| EML5     | -0.87079 | 1.466121 | -2.52776 | 0.012263 | 0.03503  | -3.41145 |
| GAL3ST1  | -1.80709 | 0.161767 | -2.52767 | 0.012266 | 0.035032 | -3.33076 |
| CARD16   | 1.014426 | 1.880767 | 2.527596 | 0.012268 | 0.035032 | -3.2294  |
| RTN4RL2  | 1.161991 | 1.302907 | 2.527179 | 0.012282 | 0.035065 | -3.14672 |
| XRCC6BP1 | 0.520072 | 2.198028 | 2.527069 | 0.012286 | 0.035069 | -3.33552 |
| GNA11    | -0.46325 | 5.63752  | -2.52684 | 0.012294 | 0.035083 | -3.97542 |
| RPP21    | 0.564674 | 4.113772 | 2.526284 | 0.012313 | 0.03513  | -3.67915 |
| EPHB6    | -1.28069 | 3.112541 | -2.52547 | 0.01234  | 0.035202 | -3.80335 |
| ADSL     | 0.455961 | 5.191374 | 2.525129 | 0.012352 | 0.035228 | -3.87906 |
| SLCO1B3  | 3.409615 | 0.445273 | 2.524337 | 0.012379 | 0.035278 | -3.07282 |
| ZNF658   | -0.75292 | 1.387886 | -2.52442 | 0.012376 | 0.035278 | -3.39105 |
| NSUN7    | -1.20982 | 1.717309 | -2.52432 | 0.012379 | 0.035278 | -3.5131  |
| IFI16    | 1.162936 | 7.202929 | 2.524488 | 0.012374 | 0.035278 | -3.98349 |
| ARHGAP18 | -0.82779 | 4.701917 | -2.52385 | 0.012396 | 0.035316 | -3.94469 |
| PCOLCE2  | -1.47264 | 0.444769 | -2.52306 | 0.012423 | 0.035386 | -3.34694 |
| JAG2     | 1.034554 | 5.601102 | 2.522727 | 0.012434 | 0.035411 | -3.87089 |
| ENOX2    | 0.435692 | 4.56819  | 2.522471 | 0.012443 | 0.035429 | -3.80112 |
| VRK1     | 0.589037 | 3.876314 | 2.521671 | 0.01247  | 0.035493 | -3.63437 |
| ERCC4    | -0.39244 | 3.680161 | -2.52167 | 0.01247  | 0.035493 | -3.7752  |
| RBMX2    | 0.434853 | 4.399401 | 2.521526 | 0.012475 | 0.035499 | -3.77208 |
| RIOK1    | 0.493662 | 4.591485 | 2.520985 | 0.012494 | 0.035545 | -3.79975 |
| AXL      | -0.84014 | 5.28152  | -2.52063 | 0.012506 | 0.035572 | -3.98913 |
| FRZB     | -1.0203  | 2.202793 | -2.52056 | 0.012508 | 0.035572 | -3.58682 |
| GPR176   | 1.493438 | 2.121798 | 2.52041  | 0.012513 | 0.035579 | -3.22235 |
| C13orf27 | 0.723915 | 2.620227 | 2.519237 | 0.012554 | 0.035687 | -3.391   |
| GPR108   | -0.37268 | 5.525222 | -2.51876 | 0.01257  | 0.035727 | -3.98668 |
| C3orf1   | 0.429327 | 5.951596 | 2.518337 | 0.012585 | 0.035761 | -3.97012 |
| FBXL4    | -0.35636 | 4.084338 | -2.51706 | 0.012629 | 0.035879 | -3.8485  |
| NPRL2    | -0.47098 | 3.586831 | -2.51684 | 0.012637 | 0.035893 | -3.78053 |
| IL22RA1  | 1.69955  | 4.156755 | 2.515887 | 0.01267  | 0.035973 | -3.50385 |
| DNAJC3   | -0.49421 | 6.518577 | -2.51592 | 0.012669 | 0.035973 | -4.01243 |
| TMPRSS2  | -2.29709 | 4.303905 | -2.51578 | 0.012674 | 0.035976 | -4.00068 |
| LYSMD3   | -0.42181 | 4.813699 | -2.51511 | 0.012697 | 0.036035 | -3.94597 |
| FAM168A  | -0.5357  | 3.275891 | -2.51444 | 0.01272  | 0.036091 | -3.73726 |
| CCDC50   | -0.53701 | 6.323876 | -2.5144  | 0.012722 | 0.036091 | -4.01755 |
| FPGS     | 0.485592 | 5.783643 | 2.514277 | 0.012726 | 0.036096 | -3.96257 |
| RBM14    | 0.301319 | 6.373518 | 2.513889 | 0.01274  | 0.036126 | -4.00916 |
| DDOST    | 0.344745 | 7.679181 | 2.513826 | 0.012742 | 0.036126 | -4.01061 |
| COL18A1  | 0.671076 | 7.73272  | 2.513745 | 0.012745 | 0.036127 | -4.01503 |

|           |          |          |          |          |          |          |
|-----------|----------|----------|----------|----------|----------|----------|
| RBM43     | -0.50191 | 2.698822 | -2.51248 | 0.012789 | 0.036245 | -3.61526 |
| NPHP4     | 0.589853 | 4.208138 | 2.511939 | 0.012808 | 0.036292 | -3.72746 |
| LOC388152 | -0.63162 | 4.5976   | -2.51135 | 0.012829 | 0.036342 | -3.95134 |
| ANKRD13A  | -0.39052 | 5.997123 | -2.51129 | 0.012831 | 0.036342 | -4.02201 |
| FAM188B   | 0.767754 | 3.022999 | 2.511194 | 0.012834 | 0.036344 | -3.46741 |
| STX1A     | 1.00308  | 3.082675 | 2.511045 | 0.012839 | 0.036351 | -3.44153 |
| DHX8      | 0.352266 | 6.211254 | 2.510304 | 0.012866 | 0.036418 | -4.00929 |
| SEC62     | -0.54422 | 7.818707 | -2.50987 | 0.012881 | 0.036454 | -3.99622 |
| PTGES     | 1.782605 | 3.697973 | 2.509521 | 0.012893 | 0.036481 | -3.43308 |
| ANP32B    | 0.388311 | 7.1423   | 2.509374 | 0.012898 | 0.036489 | -4.02988 |
| PLXNA2    | -0.74672 | 6.684975 | -2.50909 | 0.012908 | 0.036509 | -4.02246 |
| CDKL5     | -0.77384 | 1.718178 | -2.50808 | 0.012944 | 0.0366   | -3.48455 |
| CYP27A1   | -0.98773 | 3.295622 | -2.50792 | 0.01295  | 0.0366   | -3.83213 |
| NR4A2     | -0.97632 | 4.193325 | -2.50795 | 0.012949 | 0.0366   | -3.94898 |
| AGPAT2    | 0.857589 | 6.199544 | 2.507889 | 0.012951 | 0.0366   | -3.98411 |
| EXOSC9    | 0.394576 | 4.187492 | 2.507391 | 0.012969 | 0.036643 | -3.77138 |
| GATA3     | 1.703483 | 1.643362 | 2.506992 | 0.012983 | 0.03667  | -3.17895 |
| TAOK2     | -0.3279  | 6.172646 | -2.50697 | 0.012984 | 0.03667  | -4.0346  |
| RPL22L1   | 0.919105 | 4.859141 | 2.506285 | 0.013008 | 0.036732 | -3.81245 |
| STEAP1    | 1.213713 | 4.116087 | 2.505926 | 0.013021 | 0.036761 | -3.6046  |
| DHDDS     | -0.36892 | 5.001324 | -2.50574 | 0.013028 | 0.036772 | -3.98147 |
| TTC12     | -0.52031 | 2.674231 | -2.50554 | 0.013035 | 0.036774 | -3.62865 |
| FOXRED2   | 0.675331 | 5.757112 | 2.505554 | 0.013034 | 0.036774 | -3.9654  |
| HBP1      | -0.40937 | 6.17954  | -2.5055  | 0.013036 | 0.036774 | -4.03902 |
| TMEM60    | 0.459172 | 3.574869 | 2.503673 | 0.013101 | 0.036946 | -3.63999 |
| EPM2AIP1  | -0.55704 | 5.270251 | -2.50364 | 0.013102 | 0.036946 | -4.01855 |
| GPHN      | -0.56168 | 4.38949  | -2.50306 | 0.013123 | 0.036998 | -3.94345 |
| PLEKHB2   | -0.44532 | 7.083623 | -2.50223 | 0.013153 | 0.037075 | -4.03661 |
| TMEM209   | 0.467289 | 4.946702 | 2.501324 | 0.013186 | 0.037151 | -3.90457 |
| ROMO1     | 0.548697 | 5.23321  | 2.501364 | 0.013184 | 0.037151 | -3.93147 |
| NXPH4     | 3.392057 | 2.603193 | 2.500994 | 0.013198 | 0.037177 | -3.13661 |
| C7orf55   | -0.55319 | 2.797043 | -2.50075 | 0.013207 | 0.037195 | -3.67219 |
| MXD3      | 0.637649 | 3.577768 | 2.50032  | 0.013222 | 0.037231 | -3.61517 |
| KSR2      | -1.22661 | 0.097003 | -2.50008 | 0.013231 | 0.037241 | -3.32132 |
| LYST      | -0.59982 | 5.581458 | -2.50011 | 0.01323  | 0.037241 | -4.04254 |
| GK3P      | 0.91247  | -0.04342 | 2.499613 | 0.013248 | 0.037281 | -3.1273  |
| ZNF350    | -0.93877 | 2.052857 | -2.49912 | 0.013266 | 0.037323 | -3.59507 |
| MPHOSPH6  | 0.579062 | 4.187558 | 2.498382 | 0.013292 | 0.037391 | -3.75924 |
| ARHGEF17  | -0.70422 | 5.660805 | -2.4971  | 0.013339 | 0.037515 | -4.05468 |
| PPAPDC1B  | -0.67623 | 4.672691 | -2.49586 | 0.013384 | 0.037627 | -3.99932 |
| TRIM13    | -0.4672  | 5.215255 | -2.49592 | 0.013382 | 0.037627 | -4.02889 |
| TBC1D20   | -0.32069 | 5.838713 | -2.49545 | 0.013399 | 0.037661 | -4.05454 |
| ZNF707    | 0.473638 | 3.235392 | 2.494958 | 0.013417 | 0.037689 | -3.59062 |
| TNFRSF12A | 0.972895 | 5.4948   | 2.49509  | 0.013413 | 0.037689 | -3.93202 |
| RALGAPA2  | -1.00554 | 5.303631 | -2.49497 | 0.013417 | 0.037689 | -4.05628 |
| RFX1      | -0.27263 | 5.052459 | -2.49326 | 0.01348  | 0.037857 | -4.0086  |
| ADAMTS5   | -0.90653 | 2.884164 | -2.49305 | 0.013487 | 0.037865 | -3.77368 |
| PGM2      | 0.629293 | 5.639637 | 2.493031 | 0.013488 | 0.037865 | -3.98882 |
| RAI14     | 0.73147  | 6.396813 | 2.49296  | 0.013491 | 0.037865 | -4.0425  |
| UNG       | 0.522771 | 5.405834 | 2.492681 | 0.013501 | 0.037886 | -3.97458 |
| MOCOS     | 1.214412 | 3.605446 | 2.492504 | 0.013507 | 0.037897 | -3.54169 |
| DAAM1     | -0.6399  | 5.098612 | -2.49195 | 0.013528 | 0.037947 | -4.04054 |
| CCDC43    | 0.372026 | 4.616771 | 2.491789 | 0.013534 | 0.037948 | -3.89211 |
| ALDH1L2   | -1.09279 | 3.899161 | -2.49181 | 0.013533 | 0.037948 | -3.96504 |
| GRAMD2    | 1.403126 | 1.429506 | 2.490913 | 0.013566 | 0.038023 | -3.22049 |
| DNAJB9    | -0.44254 | 4.639367 | -2.49084 | 0.013569 | 0.038023 | -3.98892 |
| NEAT1     | -0.76294 | 8.800241 | -2.49092 | 0.013566 | 0.038023 | -4.00254 |
| TMPRSS13  | 3.563635 | 2.618538 | 2.489648 | 0.013613 | 0.038132 | -3.15951 |

|          |          |          |          |          |          |          |
|----------|----------|----------|----------|----------|----------|----------|
| C6orf35  | -0.39325 | 3.750593 | -2.48967 | 0.013612 | 0.038132 | -3.86561 |
| EPHA1    | 1.476645 | 4.771832 | 2.489455 | 0.01362  | 0.038144 | -3.72723 |
| KLC2     | 0.507204 | 5.756601 | 2.488803 | 0.013644 | 0.038205 | -4.0203  |
| CD177    | 2.891344 | 0.964569 | 2.488553 | 0.013654 | 0.038223 | -3.15713 |
| NRD1     | 0.280086 | 7.155854 | 2.487797 | 0.013682 | 0.038294 | -4.08124 |
| CLDN11   | -1.05897 | 0.326855 | -2.48743 | 0.013696 | 0.038325 | -3.36357 |
| GRK6     | 0.452051 | 5.554432 | 2.486298 | 0.013738 | 0.038435 | -4.01209 |
| ZNF598   | 0.423442 | 6.381224 | 2.486091 | 0.013746 | 0.038449 | -4.07243 |
| RNF213   | 0.598196 | 8.355203 | 2.485878 | 0.013754 | 0.038464 | -4.06803 |
| RBMX     | 0.261489 | 7.19683  | 2.485235 | 0.013778 | 0.038524 | -4.08672 |
| PPA2     | -0.36301 | 5.339761 | -2.48451 | 0.013805 | 0.038591 | -4.05844 |
| PMS2L5   | 0.676315 | 0.413322 | 2.484331 | 0.013812 | 0.038603 | -3.19872 |
| PDLIM5   | -0.45155 | 7.480386 | -2.4842  | 0.013816 | 0.038609 | -4.07074 |
| C19orf42 | -0.33166 | 5.267019 | -2.48408 | 0.013821 | 0.038614 | -4.05256 |
| C1orf51  | -0.96976 | 1.925399 | -2.48253 | 0.013879 | 0.038746 | -3.61545 |
| BST2     | 1.357314 | 5.885181 | 2.482751 | 0.013871 | 0.038746 | -3.96538 |
| GMEB2    | 0.332243 | 5.115534 | 2.482641 | 0.013875 | 0.038746 | -3.98569 |
| SPSB3    | -0.39072 | 5.048097 | -2.48255 | 0.013879 | 0.038746 | -4.04331 |
| HSD17B7  | 0.55372  | 3.245851 | 2.482268 | 0.013889 | 0.038766 | -3.60882 |
| ORC5L    | 0.52584  | 4.282418 | 2.481555 | 0.013916 | 0.038833 | -3.82832 |
| JAG1     | 0.883447 | 7.95215  | 2.481401 | 0.013922 | 0.038842 | -4.09254 |
| C6orf134 | 0.582429 | 3.648121 | 2.480923 | 0.01394  | 0.038885 | -3.68611 |
| FAM89A   | 1.043386 | 3.508995 | 2.480722 | 0.013948 | 0.03889  | -3.58032 |
| RRS1     | 0.542907 | 4.905848 | 2.480728 | 0.013948 | 0.03889  | -3.93956 |
| FGFR3    | 1.583236 | 6.040122 | 2.480277 | 0.013965 | 0.03893  | -3.96474 |
| GPC6     | -1.093   | 3.606021 | -2.47969 | 0.013987 | 0.038984 | -3.96022 |
| SEC23IP  | -0.41402 | 5.979653 | -2.47944 | 0.013997 | 0.039003 | -4.09894 |
| PCDHAC2  | -1.57781 | 0.348102 | -2.47921 | 0.014005 | 0.039019 | -3.44929 |
| CCDC28A  | -0.43562 | 3.719626 | -2.47894 | 0.014016 | 0.039041 | -3.89008 |
| GLTPD1   | -0.55006 | 5.595498 | -2.47787 | 0.014057 | 0.039146 | -4.09511 |
| C19orf53 | 0.495029 | 5.519826 | 2.477262 | 0.01408  | 0.039203 | -4.02656 |
| TELO2    | 0.414627 | 5.06941  | 2.47666  | 0.014103 | 0.039259 | -3.98607 |
| PRPS1    | 0.490235 | 4.935884 | 2.476202 | 0.01412  | 0.0393   | -3.96128 |
| BLOC1S3  | 0.427893 | 4.102754 | 2.47577  | 0.014137 | 0.039339 | -3.82238 |
| LSS      | -0.54575 | 5.746896 | -2.47541 | 0.014151 | 0.039369 | -4.10569 |
| SEMA7A   | 1.129691 | 3.126854 | 2.474746 | 0.014176 | 0.039417 | -3.51813 |
| FAM176B  | 0.69801  | 3.205206 | 2.474839 | 0.014173 | 0.039417 | -3.59744 |
| SPIRE1   | -0.77235 | 4.942373 | -2.47476 | 0.014175 | 0.039417 | -4.07917 |
| DHRS7B   | -0.48421 | 3.773341 | -2.47467 | 0.014179 | 0.039417 | -3.91775 |
| HK1      | -0.68132 | 7.335302 | -2.47412 | 0.0142   | 0.039468 | -4.09329 |
| C16orf62 | -0.76788 | 4.704616 | -2.47371 | 0.014216 | 0.039503 | -4.06343 |
| NAAA     | -0.68122 | 3.60941  | -2.47294 | 0.014246 | 0.039579 | -3.92391 |
| CST6     | 2.474991 | 0.35477  | 2.47179  | 0.01429  | 0.039694 | -3.19296 |
| SLC25A25 | -0.65237 | 5.154694 | -2.47061 | 0.014336 | 0.039814 | -4.09578 |
| SCUBE3   | -1.19633 | 0.95352  | -2.47019 | 0.014352 | 0.039835 | -3.51273 |
| TMCO6    | 0.46905  | 3.363324 | 2.470205 | 0.014352 | 0.039835 | -3.67493 |
| IGFBP3   | 1.072796 | 7.137076 | 2.470236 | 0.014351 | 0.039835 | -4.11515 |
| NBPF3    | -0.7372  | 2.465609 | -2.47009 | 0.014356 | 0.039838 | -3.71062 |
| SEPSECS  | -0.53296 | 4.014772 | -2.46987 | 0.014365 | 0.039854 | -3.97331 |
| PRKAR1A  | -0.33645 | 7.817745 | -2.46969 | 0.014372 | 0.039865 | -4.09889 |
| SRP9     | 0.337132 | 7.685926 | 2.469264 | 0.014388 | 0.039904 | -4.11783 |
| ITGB6    | 1.666215 | 6.037705 | 2.469009 | 0.014398 | 0.039923 | -3.97782 |
| CLEC1A   | -0.78755 | 0.879148 | -2.4689  | 0.014402 | 0.039927 | -3.45043 |
| TYRP1    | -1.34865 | 0.029499 | -2.4684  | 0.014422 | 0.039973 | -3.40141 |
| PQLC1    | -0.39805 | 4.950793 | -2.46833 | 0.014425 | 0.039973 | -4.06953 |
| PLCD1    | -0.74683 | 3.944762 | -2.46806 | 0.014435 | 0.039986 | -3.99379 |
| COL4A5   | -1.42402 | 5.245484 | -2.46813 | 0.014433 | 0.039986 | -4.12566 |
| JMJD5    | -0.43899 | 1.513383 | -2.46722 | 0.014468 | 0.040061 | -3.50275 |

|          |          |          |          |          |          |          |
|----------|----------|----------|----------|----------|----------|----------|
| TSEN15   | 0.478624 | 5.012268 | 2.467234 | 0.014468 | 0.040061 | -3.99415 |
| SEC24B   | -0.34822 | 6.102143 | -2.46708 | 0.014474 | 0.040068 | -4.12982 |
| C2       | 1.580202 | 4.869661 | 2.46694  | 0.014479 | 0.040072 | -3.78275 |
| CDK16    | 0.419984 | 6.91823  | 2.466901 | 0.014481 | 0.040072 | -4.13169 |
| OBSL1    | -1.03302 | 4.952251 | -2.46627 | 0.014505 | 0.040133 | -4.11278 |
| ALKBH2   | 0.609019 | 2.798169 | 2.465815 | 0.014523 | 0.040174 | -3.56095 |
| TOR1A    | 0.335632 | 5.238391 | 2.465276 | 0.014545 | 0.040225 | -4.04069 |
| ANO1     | 1.453084 | 7.335648 | 2.464808 | 0.014563 | 0.04026  | -4.12211 |
| GARS     | 0.451108 | 7.363503 | 2.464829 | 0.014562 | 0.04026  | -4.13556 |
| RRP1     | 0.53503  | 4.76137  | 2.464342 | 0.014581 | 0.040303 | -3.95806 |
| PKIG     | -0.6224  | 4.137101 | -2.46339 | 0.014619 | 0.040399 | -4.01751 |
| C17orf69 | -0.60902 | 1.617149 | -2.4626  | 0.01465  | 0.040477 | -3.5532  |
| CAB39    | -0.40567 | 7.158658 | -2.46252 | 0.014653 | 0.040478 | -4.13124 |
| PGBD1    | -0.60146 | 1.798896 | -2.46157 | 0.014691 | 0.040566 | -3.58444 |
| PSMB10   | 0.811685 | 4.914215 | 2.461626 | 0.014689 | 0.040566 | -3.94615 |
| CCDC41   | 0.497345 | 3.25326  | 2.461496 | 0.014694 | 0.040566 | -3.6683  |
| KIAA1432 | -0.46038 | 5.284592 | -2.46103 | 0.014712 | 0.040609 | -4.11661 |
| FAM119B  | -0.38871 | 3.47105  | -2.45988 | 0.014758 | 0.040727 | -3.88023 |
| RIMKLA   | -1.34788 | 1.589615 | -2.45966 | 0.014767 | 0.040743 | -3.66707 |
| ZBTB1    | -0.32078 | 5.494058 | -2.45936 | 0.014779 | 0.040769 | -4.12588 |
| BAMBI    | 2.096902 | 3.259555 | 2.459081 | 0.01479  | 0.040791 | -3.44267 |
| ITFG3    | -0.48384 | 6.823182 | -2.45813 | 0.014828 | 0.040888 | -4.14693 |
| DCLRE1C  | 0.470527 | 4.606952 | 2.457459 | 0.014855 | 0.040954 | -3.95776 |
| LRRC49   | -0.61158 | 1.928009 | -2.45734 | 0.01486  | 0.040959 | -3.61747 |
| SNAI1    | 1.074481 | 2.324729 | 2.456869 | 0.014879 | 0.041003 | -3.44974 |
| SIAE     | -0.85435 | 4.654619 | -2.45658 | 0.01489  | 0.041027 | -4.10504 |
| USP10    | 0.339442 | 6.729285 | 2.456325 | 0.014901 | 0.041047 | -4.15554 |
| ZDHHC3   | -0.43472 | 6.613409 | -2.45592 | 0.014917 | 0.041084 | -4.15636 |
| ZNF268   | -0.68704 | 3.968664 | -2.45552 | 0.014933 | 0.04112  | -4.02071 |
| GPC3     | -1.59401 | 2.920598 | -2.45537 | 0.014939 | 0.041129 | -3.97882 |
| NOC3L    | 0.395871 | 4.673187 | 2.455233 | 0.014945 | 0.041136 | -3.98536 |
| NOV      | -0.9204  | 2.670168 | -2.45468 | 0.014967 | 0.041189 | -3.82647 |
| NTHL1    | 0.541165 | 3.069446 | 2.454172 | 0.014987 | 0.041238 | -3.6443  |
| POP5     | 0.535994 | 3.439668 | 2.453137 | 0.015029 | 0.041345 | -3.71787 |
| FBXO7    | -0.26308 | 6.291143 | -2.45303 | 0.015034 | 0.041348 | -4.16487 |
| GEM      | -0.92302 | 4.371945 | -2.4527  | 0.015047 | 0.041378 | -4.09606 |
| TCTEX1D2 | 1.163274 | 2.150602 | 2.451721 | 0.015087 | 0.041478 | -3.42592 |
| UCHL3    | 0.62     | 4.499138 | 2.451412 | 0.015099 | 0.041505 | -3.9266  |
| ACLY     | 0.580094 | 7.611242 | 2.450258 | 0.015146 | 0.041626 | -4.16828 |
| CHD9     | -0.46064 | 6.39248  | -2.44946 | 0.015179 | 0.041707 | -4.17371 |
| BMS1P4   | -0.58717 | 0.91479  | -2.44899 | 0.015198 | 0.041751 | -3.47482 |
| NETO2    | 1.69294  | 4.382297 | 2.448765 | 0.015207 | 0.041763 | -3.70837 |
| MAMLD1   | -0.80038 | 2.913064 | -2.44874 | 0.015208 | 0.041763 | -3.86794 |
| ZNF642   | 0.632259 | 2.12649  | 2.448427 | 0.015221 | 0.041774 | -3.4964  |
| PIP5K1B  | -1.70782 | 2.56602  | -2.4485  | 0.015218 | 0.041774 | -3.94241 |
| WWP2     | -0.38763 | 6.307422 | -2.44847 | 0.015219 | 0.041774 | -4.17642 |
| GPR180   | 0.504527 | 4.41344  | 2.448157 | 0.015232 | 0.041796 | -3.93671 |
| PYCR2    | 0.580003 | 6.063357 | 2.447906 | 0.015243 | 0.041816 | -4.13738 |
| PTPRE    | 0.634613 | 5.053564 | 2.447803 | 0.015247 | 0.041819 | -4.02693 |
| DAP3     | 0.338494 | 6.198586 | 2.447322 | 0.015267 | 0.041865 | -4.1604  |
| SP110    | 0.642758 | 4.624949 | 2.447084 | 0.015276 | 0.041875 | -3.95616 |
| NDUFB2   | -0.44301 | 5.026949 | -2.44702 | 0.015279 | 0.041875 | -4.12989 |
| MGEA5    | -0.31903 | 7.052678 | -2.44716 | 0.015273 | 0.041875 | -4.1715  |
| SPHK1    | 1.419315 | 4.529639 | 2.446526 | 0.015299 | 0.041922 | -3.79699 |
| PTBP2    | -0.54074 | 3.82261  | -2.44637 | 0.015306 | 0.041932 | -4.00456 |
| ALKBH5   | -0.35992 | 6.663923 | -2.44621 | 0.015312 | 0.041941 | -4.17969 |
| BNIP3    | -1.24313 | 4.245742 | -2.44568 | 0.015334 | 0.041993 | -4.12473 |
| IQCB1    | 0.526167 | 4.31711  | 2.444402 | 0.015387 | 0.042129 | -3.92405 |

|           |          |          |          |          |          |          |
|-----------|----------|----------|----------|----------|----------|----------|
| ITGA6     | 0.806457 | 8.915469 | 2.44408  | 0.0154   | 0.042158 | -4.15705 |
| SPATA5L1  | 0.506004 | 3.682105 | 2.443807 | 0.015412 | 0.04218  | -3.79656 |
| AP3S2     | -0.39354 | 5.698387 | -2.44205 | 0.015485 | 0.042372 | -4.17942 |
| C11orf61  | -0.49155 | 3.441686 | -2.44169 | 0.0155   | 0.042404 | -3.93552 |
| CBLN3     | -0.61491 | 0.880133 | -2.44157 | 0.015504 | 0.04241  | -3.4923  |
| QPCTL     | 0.506258 | 2.762553 | 2.440897 | 0.015533 | 0.04247  | -3.62711 |
| CCDC90A   | 0.533736 | 4.327775 | 2.440955 | 0.01553  | 0.04247  | -3.9338  |
| FAM20C    | -0.80978 | 5.417585 | -2.43988 | 0.015575 | 0.042577 | -4.18704 |
| ZNF395    | -0.53314 | 6.146257 | -2.43962 | 0.015586 | 0.042599 | -4.19711 |
| ZNF747    | -0.41088 | 3.27501  | -2.43935 | 0.015597 | 0.042614 | -3.89364 |
| VPS25     | 0.378994 | 5.670784 | 2.439374 | 0.015596 | 0.042614 | -4.14072 |
| C9orf142  | 0.552582 | 3.869611 | 2.438913 | 0.015615 | 0.042655 | -3.83647 |
| VWF       | -0.99317 | 7.226225 | -2.43883 | 0.015619 | 0.042657 | -4.1722  |
| METTL8    | 0.564351 | 4.860479 | 2.438247 | 0.015643 | 0.042715 | -4.03218 |
| PDIA3P    | 0.399553 | 7.369971 | 2.438    | 0.015654 | 0.042734 | -4.19863 |
| PPCS      | -0.34161 | 5.076316 | -2.43727 | 0.015684 | 0.042809 | -4.14966 |
| LOC647121 | 1.29516  | 1.078534 | 2.436587 | 0.015713 | 0.04288  | -3.31832 |
| HIST1H2AC | 1.013688 | 5.021783 | 2.436379 | 0.015722 | 0.042896 | -3.99203 |
| RNF126    | 0.455408 | 5.832803 | 2.436279 | 0.015726 | 0.042899 | -4.15591 |
| HPS6      | -0.38436 | 4.249092 | -2.43616 | 0.015731 | 0.042904 | -4.06796 |
| BMP6      | -0.68446 | 2.044425 | -2.43596 | 0.01574  | 0.042919 | -3.69812 |
| MDC1      | 0.467397 | 5.811488 | 2.43586  | 0.015744 | 0.042922 | -4.15408 |
| LOC162632 | -1.29685 | 1.627817 | -2.43577 | 0.015748 | 0.042924 | -3.7244  |
| ZNF76     | -0.37638 | 4.283427 | -2.43562 | 0.015754 | 0.04293  | -4.07292 |
| ALDH1B1   | -0.80346 | 5.212205 | -2.43557 | 0.015756 | 0.04293  | -4.18885 |
| PGLYRP4   | 2.831866 | 0.037903 | 2.435483 | 0.01576  | 0.042932 | -3.27371 |
| LOC374443 | 0.94535  | 2.17954  | 2.435091 | 0.015776 | 0.042968 | -3.49547 |
| C6orf145  | -0.55033 | 4.635308 | -2.43463 | 0.015796 | 0.043013 | -4.13251 |
| PRKCSH    | 0.320565 | 8.155404 | 2.433555 | 0.015841 | 0.043129 | -4.1916  |
| PRDX5     | -0.49664 | 6.409441 | -2.43345 | 0.015846 | 0.043132 | -4.2112  |
| KIAA1614  | -0.79785 | 1.383974 | -2.4333  | 0.015852 | 0.043142 | -3.61198 |
| CALCOCO2  | -0.40003 | 6.720825 | -2.43247 | 0.015888 | 0.04323  | -4.2108  |
| MRPL2     | 0.612367 | 4.596144 | 2.432133 | 0.015902 | 0.04326  | -3.99166 |
| C4orf3    | -0.56395 | 6.314131 | -2.43195 | 0.01591  | 0.043273 | -4.21494 |
| RNPC3     | -0.41977 | 2.890253 | -2.43164 | 0.015923 | 0.043284 | -3.83059 |
| ARFGEF2   | -0.44074 | 7.098396 | -2.43175 | 0.015918 | 0.043284 | -4.20478 |
| MLF2      | 0.414666 | 7.481865 | 2.431698 | 0.015921 | 0.043284 | -4.21199 |
| FAM108A1  | -0.37472 | 5.094577 | -2.43134 | 0.015936 | 0.043305 | -4.16771 |
| UQCRRF1   | -0.51118 | 6.424077 | -2.43131 | 0.015937 | 0.043305 | -4.21597 |
| CENPC1    | -0.43203 | 3.864048 | -2.43112 | 0.015945 | 0.043319 | -4.03059 |
| ATAD3B    | 0.643003 | 4.136874 | 2.430874 | 0.015956 | 0.043338 | -3.89538 |
| RAB7A     | 0.406887 | 8.477114 | 2.430799 | 0.015959 | 0.043339 | -4.19117 |
| SYT11     | -0.78176 | 3.376702 | -2.43056 | 0.015969 | 0.043358 | -4.0003  |
| SCAND2    | -0.30402 | 3.575967 | -2.4304  | 0.015976 | 0.04336  | -3.95651 |
| ATP1B1    | -1.01737 | 8.26262  | -2.43039 | 0.015976 | 0.04336  | -4.15693 |
| MRPL36    | 0.623431 | 4.367215 | 2.429799 | 0.016002 | 0.043421 | -3.9504  |
| GATSL3    | -0.79667 | 2.64301  | -2.42957 | 0.016012 | 0.043424 | -3.85736 |
| REXO2     | -0.43034 | 4.845584 | -2.42956 | 0.016012 | 0.043424 | -4.1544  |
| PTCH1     | -0.85239 | 4.557704 | -2.42968 | 0.016007 | 0.043424 | -4.16104 |
| MSR1      | 1.601281 | 3.11813  | 2.429233 | 0.016026 | 0.043448 | -3.55988 |
| SOC5      | -0.48858 | 2.50371  | -2.42919 | 0.016028 | 0.043448 | -3.76919 |
| DNAJC24   | -0.37339 | 3.613149 | -2.42913 | 0.01603  | 0.043448 | -3.97955 |
| FAM134B   | -1.15675 | 3.66132  | -2.42872 | 0.016048 | 0.043469 | -4.0931  |
| MYL6      | -0.4313  | 8.640949 | -2.42867 | 0.01605  | 0.043469 | -4.166   |
| TM4SF1    | 0.782805 | 8.143663 | 2.428787 | 0.016045 | 0.043469 | -4.21237 |
| AGFG1     | 0.37095  | 7.013379 | 2.428672 | 0.01605  | 0.043469 | -4.22314 |
| VMAC      | -0.43224 | 2.218744 | -2.42822 | 0.016069 | 0.043512 | -3.70704 |
| ATHL1     | 1.237995 | 4.466862 | 2.428083 | 0.016075 | 0.04352  | -3.85476 |

|           |          |          |          |          |          |          |
|-----------|----------|----------|----------|----------|----------|----------|
| AP3B1     | -0.3261  | 6.148879 | -2.42796 | 0.016081 | 0.043526 | -4.22307 |
| PLEKHO2   | -0.54623 | 4.895836 | -2.42751 | 0.0161   | 0.043569 | -4.17306 |
| XRCC5     | 0.293599 | 8.203559 | 2.427268 | 0.01611  | 0.043589 | -4.2045  |
| NAPEPLD   | -0.51849 | 4.815554 | -2.42715 | 0.016115 | 0.043594 | -4.16383 |
| ABCD1     | 0.696765 | 5.166629 | 2.427067 | 0.016119 | 0.043596 | -4.08333 |
| ERG       | -0.65338 | 3.379693 | -2.42698 | 0.016123 | 0.043597 | -3.98592 |
| EEF1A1P9  | -0.54997 | 2.995603 | -2.42684 | 0.016129 | 0.043605 | -3.88936 |
| SAFB2     | -0.22016 | 5.939949 | -2.42671 | 0.016134 | 0.043612 | -4.21888 |
| VOPP1     | 0.658849 | 5.423352 | 2.426507 | 0.016143 | 0.043627 | -4.11982 |
| MYO5C     | -1.30006 | 5.01235  | -2.42638 | 0.016149 | 0.043633 | -4.21753 |
| NOL8      | 0.339614 | 5.330139 | 2.425354 | 0.016193 | 0.043745 | -4.1445  |
| APEH      | -0.47913 | 6.085562 | -2.42514 | 0.016202 | 0.043762 | -4.23047 |
| ATP13A1   | 0.372442 | 6.891231 | 2.425037 | 0.016207 | 0.043765 | -4.23112 |
| RSC1A1    | 0.488878 | 4.341125 | 2.424656 | 0.016223 | 0.043801 | -3.98281 |
| DGKH      | 1.039459 | 3.117055 | 2.424389 | 0.016235 | 0.043824 | -3.6476  |
| STX19     | -1.07944 | 0.781521 | -2.42386 | 0.016258 | 0.043875 | -3.57426 |
| USP34     | -0.33505 | 7.540561 | -2.42381 | 0.01626  | 0.043875 | -4.21545 |
| HOXB5     | 1.987787 | 1.672749 | 2.423641 | 0.016267 | 0.043886 | -3.34155 |
| SIGMAR1   | 0.554354 | 6.655602 | 2.423212 | 0.016286 | 0.043928 | -4.22742 |
| RHOG      | 0.429876 | 6.199963 | 2.422977 | 0.016296 | 0.043947 | -4.2138  |
| AMD1      | -0.35506 | 6.951997 | -2.42267 | 0.01631  | 0.043975 | -4.2306  |
| SMAP1     | -0.43938 | 5.740002 | -2.42252 | 0.016316 | 0.043984 | -4.22831 |
| CSNK2B    | 0.410481 | 7.215314 | 2.422176 | 0.016331 | 0.044016 | -4.23778 |
| TRAPPC10  | -0.32388 | 6.20188  | -2.42166 | 0.016354 | 0.044068 | -4.23857 |
| EXOC8     | -0.2925  | 4.869832 | -2.42125 | 0.016372 | 0.044108 | -4.16459 |
| SNX25     | -0.39385 | 3.685789 | -2.42087 | 0.016388 | 0.044145 | -4.01762 |
| TLR9      | -0.8939  | 0.300794 | -2.42071 | 0.016395 | 0.044155 | -3.49516 |
| ARNT      | -0.26985 | 5.855575 | -2.42063 | 0.016399 | 0.044155 | -4.23176 |
| RPF2      | 0.507839 | 4.181099 | 2.42034  | 0.016411 | 0.044174 | -3.9561  |
| ZNF780B   | -0.53294 | 3.947001 | -2.42033 | 0.016412 | 0.044174 | -4.08225 |
| CSPG4     | -1.22236 | 6.133168 | -2.42023 | 0.016416 | 0.044177 | -4.23598 |
| NFX1      | -0.36173 | 5.704726 | -2.41975 | 0.016437 | 0.044226 | -4.23122 |
| WARS      | 0.788073 | 7.735293 | 2.418691 | 0.016484 | 0.044342 | -4.2436  |
| TAB2      | -0.34621 | 6.825643 | -2.41845 | 0.016494 | 0.044362 | -4.24287 |
| VGLL3     | -0.97132 | 3.037621 | -2.41827 | 0.016502 | 0.044374 | -3.99641 |
| C20orf135 | 0.651498 | 3.203969 | 2.417937 | 0.016517 | 0.044405 | -3.73627 |
| C1orf170  | 1.373701 | 1.022482 | 2.41759  | 0.016532 | 0.044438 | -3.34874 |
| AADAC     | -1.72148 | 0.678797 | -2.41729 | 0.016546 | 0.044465 | -3.65591 |
| ARL6IP4   | -0.33374 | 6.184461 | -2.41675 | 0.016569 | 0.044521 | -4.24997 |
| TWIST1    | 1.544769 | 1.946186 | 2.41653  | 0.016579 | 0.044538 | -3.43781 |
| LTB       | 1.539006 | 2.090015 | 2.415818 | 0.016611 | 0.044592 | -3.45597 |
| MORN4     | -0.75582 | 1.554848 | -2.41581 | 0.016611 | 0.044592 | -3.67174 |
| FBXW9     | 0.505226 | 2.959774 | 2.415789 | 0.016612 | 0.044592 | -3.72011 |
| NCOA7     | 0.773836 | 6.754387 | 2.41585  | 0.016609 | 0.044592 | -4.24085 |
| EXOSC8    | 0.530086 | 4.160681 | 2.415001 | 0.016647 | 0.044673 | -3.95896 |
| C19orf61  | 0.415325 | 4.652048 | 2.414961 | 0.016649 | 0.044673 | -4.07358 |
| MAGED2    | -0.4532  | 6.267866 | -2.41446 | 0.016671 | 0.044724 | -4.25657 |
| TMEM158   | 1.48624  | 4.03204  | 2.414062 | 0.016688 | 0.044754 | -3.76263 |
| PIGH      | -0.3622  | 3.703152 | -2.41408 | 0.016688 | 0.044754 | -4.02908 |
| SCARNA7   | -0.75112 | 1.263309 | -2.41384 | 0.016698 | 0.044772 | -3.63022 |
| CTCF      | 0.244511 | 6.199886 | 2.413272 | 0.016724 | 0.044831 | -4.24458 |
| OLFML1    | -0.80423 | 2.458426 | -2.41305 | 0.016734 | 0.04485  | -3.8547  |
| PARP10    | 0.542768 | 5.731334 | 2.412519 | 0.016757 | 0.044904 | -4.19556 |
| MED9      | -0.36065 | 3.537059 | -2.41089 | 0.01683  | 0.045091 | -4.00459 |
| EIF3A     | -0.2897  | 8.515079 | -2.41072 | 0.016838 | 0.045103 | -4.21663 |
| GNAI3     | 0.37525  | 6.934835 | 2.409975 | 0.016871 | 0.045183 | -4.26676 |
| WASH2P    | -0.41031 | 3.353934 | -2.4098  | 0.016879 | 0.045195 | -3.97894 |
| FCF1      | 0.367305 | 4.856061 | 2.409443 | 0.016895 | 0.04523  | -4.12319 |

|           |          |          |          |          |          |          |
|-----------|----------|----------|----------|----------|----------|----------|
| RHOC      | 0.501407 | 6.848888 | 2.40921  | 0.016905 | 0.045249 | -4.26603 |
| GSTO1     | 0.470632 | 5.841296 | 2.409107 | 0.01691  | 0.045253 | -4.21937 |
| OXTR      | 1.206605 | 0.774723 | 2.408756 | 0.016926 | 0.045287 | -3.35942 |
| RAP1B     | 0.4712   | 6.785935 | 2.408484 | 0.016938 | 0.045311 | -4.26714 |
| CLK2      | 0.372199 | 5.032157 | 2.408354 | 0.016944 | 0.045313 | -4.14707 |
| DDX52     | 0.348711 | 5.365562 | 2.408318 | 0.016946 | 0.045313 | -4.1873  |
| OSBPL5    | -0.53024 | 4.624312 | -2.40818 | 0.016952 | 0.045322 | -4.19146 |
| OLFML3    | -0.86626 | 3.585131 | -2.40805 | 0.016958 | 0.045325 | -4.10068 |
| STT3B     | -0.43029 | 6.696987 | -2.408   | 0.01696  | 0.045325 | -4.26814 |
| ENPEP     | 1.067677 | 3.025637 | 2.407541 | 0.016981 | 0.045372 | -3.66709 |
| CMTM6     | 0.418737 | 6.709962 | 2.406867 | 0.017011 | 0.045445 | -4.27041 |
| NHLRC1    | 1.287086 | 1.793321 | 2.406357 | 0.017034 | 0.045471 | -3.46894 |
| PYROXD2   | -0.97978 | 1.090884 | -2.40655 | 0.017025 | 0.045471 | -3.65028 |
| LOC643837 | -0.39714 | 2.271319 | -2.40635 | 0.017034 | 0.045471 | -3.76327 |
| GAK       | -0.51123 | 6.897654 | -2.40629 | 0.017037 | 0.045471 | -4.26728 |
| NCOA6     | 0.323181 | 7.223444 | 2.406449 | 0.01703  | 0.045471 | -4.27378 |
| GSTT2     | -0.98219 | 1.080959 | -2.40616 | 0.017043 | 0.045474 | -3.65289 |
| DDB2      | 0.609203 | 4.245481 | 2.406056 | 0.017048 | 0.045474 | -3.98509 |
| C11orf48  | 0.562599 | 4.459067 | 2.406106 | 0.017045 | 0.045474 | -4.03391 |
| LOC728323 | -0.58254 | 0.258008 | -2.40548 | 0.017074 | 0.045534 | -3.48673 |
| CA9       | -1.91474 | 3.106015 | -2.40537 | 0.017079 | 0.045539 | -4.14605 |
| BZW1      | 0.351958 | 7.651384 | 2.404315 | 0.017127 | 0.045658 | -4.27215 |
| JDP2      | -0.52756 | 3.793872 | -2.40375 | 0.017153 | 0.045718 | -4.09592 |
| EFR3B     | -0.85208 | 1.152023 | -2.40239 | 0.017215 | 0.045875 | -3.65486 |
| NEK9      | -0.39018 | 6.107321 | -2.40208 | 0.017228 | 0.045903 | -4.28386 |
| CCDC24    | 0.785337 | 2.89428  | 2.401611 | 0.01725  | 0.045952 | -3.69917 |
| C16orf58  | -0.34824 | 6.590967 | -2.40119 | 0.017269 | 0.045994 | -4.28647 |
| RPL39L    | 1.916004 | 2.609421 | 2.400526 | 0.0173   | 0.046067 | -3.51388 |
| HCN3      | 0.696392 | 2.838608 | 2.400261 | 0.017312 | 0.046091 | -3.70667 |
| CCDC144A  | -1.20685 | 0.013519 | -2.40008 | 0.01732  | 0.046099 | -3.53977 |
| ZNF137    | -0.98197 | 0.55559  | -2.39991 | 0.017328 | 0.046099 | -3.58622 |
| ANO9      | 1.277855 | 4.175395 | 2.400011 | 0.017323 | 0.046099 | -3.84825 |
| TBL2      | 0.443639 | 5.345242 | 2.39995  | 0.017326 | 0.046099 | -4.19509 |
| KATNB1    | 0.459164 | 4.658466 | 2.39976  | 0.017335 | 0.046108 | -4.10374 |
| ZNF630    | -0.85728 | 1.168848 | -2.39931 | 0.017356 | 0.046147 | -3.6633  |
| B2M       | 0.61108  | 10.96664 | 2.399293 | 0.017357 | 0.046147 | -4.18782 |
| NAA50     | 0.441903 | 7.691144 | 2.39771  | 0.01743  | 0.046333 | -4.2883  |
| RPL7L1    | 0.524682 | 5.188892 | 2.397445 | 0.017442 | 0.046357 | -4.17505 |
| TAF1D     | 0.565573 | 4.753174 | 2.396943 | 0.017465 | 0.046402 | -4.10962 |
| TMCO3     | -0.56358 | 5.199215 | -2.39693 | 0.017466 | 0.046402 | -4.26731 |
| ZNF252    | -0.42705 | 4.894331 | -2.39597 | 0.01751  | 0.046511 | -4.23693 |
| ZNF564    | -0.41136 | 3.244008 | -2.3956  | 0.017527 | 0.046549 | -3.98729 |
| EIF2B2    | 0.400012 | 4.590676 | 2.395522 | 0.017531 | 0.046549 | -4.11158 |
| ACD       | 0.539415 | 4.437658 | 2.395315 | 0.01754  | 0.046566 | -4.06061 |
| PDIA6     | 0.357828 | 8.015924 | 2.395181 | 0.017547 | 0.046573 | -4.28571 |
| PTPRD     | -1.3768  | 1.485457 | -2.39482 | 0.017564 | 0.04661  | -3.80557 |
| HMGA2     | 3.155099 | 3.307239 | 2.394089 | 0.017597 | 0.04669  | -3.4725  |
| AHR       | 0.618019 | 7.869428 | 2.393938 | 0.017605 | 0.0467   | -4.29654 |
| HDGFRP2   | 0.326256 | 5.254577 | 2.393511 | 0.017624 | 0.046744 | -4.21217 |
| ELMO3     | 0.874841 | 5.08031  | 2.393385 | 0.01763  | 0.046751 | -4.12196 |
| C14orf33  | 0.878672 | 1.442027 | 2.393001 | 0.017648 | 0.046765 | -3.50156 |
| SGK2      | -1.85227 | 1.014535 | -2.39291 | 0.017652 | 0.046765 | -3.78327 |
| GPN3      | 0.456068 | 3.789767 | 2.392934 | 0.017651 | 0.046765 | -3.9472  |
| STARD10   | -0.90133 | 6.383761 | -2.39308 | 0.017644 | 0.046765 | -4.3006  |
| BAG1      | -0.60641 | 5.813728 | -2.39307 | 0.017645 | 0.046765 | -4.30271 |
| AHI1      | -0.57369 | 4.228035 | -2.39251 | 0.017671 | 0.046806 | -4.1877  |
| NUDT7     | -0.8573  | 1.139352 | -2.39051 | 0.017765 | 0.047045 | -3.67968 |
| ASB3      | 0.360965 | 3.719521 | 2.389881 | 0.017795 | 0.047115 | -3.95738 |

|           |          |          |          |          |          |          |
|-----------|----------|----------|----------|----------|----------|----------|
| CEP68     | -0.52578 | 5.003225 | -2.38952 | 0.017811 | 0.04715  | -4.26899 |
| SEC16B    | -0.98997 | 3.508759 | -2.38922 | 0.017826 | 0.047179 | -4.14429 |
| ARSB      | -0.5848  | 4.079687 | -2.38906 | 0.017833 | 0.047191 | -4.17982 |
| MED15     | 0.407426 | 7.186396 | 2.388415 | 0.017864 | 0.047262 | -4.31674 |
| TPPP3     | -1.0316  | 4.388481 | -2.38814 | 0.017877 | 0.047288 | -4.25637 |
| ZNF200    | 0.389202 | 3.438404 | 2.387389 | 0.017912 | 0.047372 | -3.89912 |
| PLEKHH1   | -0.97588 | 4.551818 | -2.38709 | 0.017926 | 0.047401 | -4.26806 |
| GIT2      | -0.30434 | 5.607163 | -2.38677 | 0.017941 | 0.047432 | -4.30155 |
| RAB27B    | -0.99015 | 2.900795 | -2.38649 | 0.017955 | 0.047453 | -4.0381  |
| CLK3      | -0.2876  | 5.174808 | -2.38646 | 0.017956 | 0.047453 | -4.27268 |
| ARHGEF1   | 0.383005 | 6.678481 | 2.386299 | 0.017964 | 0.047464 | -4.31829 |
| MYADM     | -0.94628 | 7.148854 | -2.38491 | 0.01803  | 0.04763  | -4.3018  |
| ZNF189    | -0.47659 | 4.463228 | -2.3844  | 0.018054 | 0.047685 | -4.22398 |
| C3orf42   | -0.58853 | 0.091513 | -2.38316 | 0.018113 | 0.047823 | -3.51667 |
| ZNF44     | -0.48853 | 3.253816 | -2.38318 | 0.018112 | 0.047823 | -4.03265 |
| RAD23A    | 0.370471 | 7.115568 | 2.382494 | 0.018145 | 0.047898 | -4.33071 |
| PI3       | 4.065651 | 6.510658 | 2.382073 | 0.018165 | 0.047942 | -3.85018 |
| DNLZ      | 0.625869 | 2.391005 | 2.381267 | 0.018204 | 0.048035 | -3.69131 |
| CDK5      | 0.574648 | 3.139753 | 2.380844 | 0.018224 | 0.048079 | -3.82157 |
| EPHB4     | 0.657482 | 7.052775 | 2.379358 | 0.018296 | 0.048259 | -4.33615 |
| PREX1     | -0.75034 | 4.780413 | -2.37902 | 0.018312 | 0.048287 | -4.29083 |
| C22orf13  | -0.35921 | 6.84149  | -2.37899 | 0.018313 | 0.048287 | -4.33422 |
| APOBEC3F  | 0.947362 | 2.88204  | 2.378889 | 0.018318 | 0.048291 | -3.72841 |
| RPUSD1    | 0.477374 | 4.610228 | 2.378387 | 0.018343 | 0.048328 | -4.14161 |
| AIFM1     | -0.40912 | 5.355724 | -2.37842 | 0.018341 | 0.048328 | -4.31178 |
| SCAP      | -0.42274 | 6.556574 | -2.37839 | 0.018342 | 0.048328 | -4.33894 |
| PAWR      | 0.647954 | 4.992744 | 2.378207 | 0.018351 | 0.048342 | -4.17981 |
| PAQR7     | -0.53228 | 3.817898 | -2.37813 | 0.018355 | 0.048342 | -4.16111 |
| CHORDC1   | 0.558427 | 5.0036   | 2.378063 | 0.018358 | 0.048342 | -4.19285 |
| CCL4      | 1.368513 | 1.788832 | 2.377967 | 0.018363 | 0.048345 | -3.52306 |
| LIMD1     | -0.44698 | 5.558111 | -2.37758 | 0.018382 | 0.048385 | -4.32615 |
| THBS3     | -0.50384 | 4.200731 | -2.37712 | 0.018404 | 0.048434 | -4.21355 |
| TSSK4     | -0.53964 | 0.415417 | -2.37653 | 0.018432 | 0.048491 | -3.56735 |
| HLCS      | -0.40027 | 4.775529 | -2.37655 | 0.018432 | 0.048491 | -4.26864 |
| LOC152217 | 0.648648 | 4.163599 | 2.376117 | 0.018453 | 0.048534 | -4.02739 |
| SLU7      | -0.28629 | 5.401876 | -2.37606 | 0.018456 | 0.048534 | -4.31365 |
| USP14     | 0.444849 | 6.547419 | 2.375541 | 0.018481 | 0.048582 | -4.33823 |
| LPIN2     | -1.07536 | 5.789561 | -2.37559 | 0.018478 | 0.048582 | -4.34546 |
| PTGES2    | 0.475308 | 5.638161 | 2.37544  | 0.018485 | 0.048585 | -4.27879 |
| NIPAL2    | -0.66566 | 4.270687 | -2.3739  | 0.018561 | 0.048773 | -4.24504 |
| PEBP1     | -0.4674  | 6.886385 | -2.37337 | 0.018587 | 0.048833 | -4.34461 |
| SELO      | -0.40144 | 4.78673  | -2.37305 | 0.018602 | 0.048864 | -4.27767 |
| GRWD1     | 0.346574 | 5.240691 | 2.372912 | 0.018609 | 0.048873 | -4.25627 |
| TCHH      | 2.280953 | 0.517428 | 2.372747 | 0.018617 | 0.048881 | -3.41463 |
| THSD7A    | -1.1152  | 0.253066 | -2.37265 | 0.018622 | 0.048881 | -3.62363 |
| MRPL37    | 0.401405 | 6.214372 | 2.37263  | 0.018623 | 0.048881 | -4.33292 |
| KDR       | -0.78796 | 4.375544 | -2.37136 | 0.018685 | 0.049036 | -4.27387 |
| ZNF579    | -0.55686 | 4.315374 | -2.37102 | 0.018702 | 0.04907  | -4.24588 |
| RGS1      | 1.471368 | 4.736213 | 2.370519 | 0.018726 | 0.049126 | -4.0038  |
| 8-Sep     | -0.33342 | 5.896713 | -2.37045 | 0.01873  | 0.049126 | -4.3515  |
|           | 3.055386 | 0.216848 | 2.370176 | 0.018743 | 0.049152 | -3.41917 |
| PLA2G4E   | 0.531687 | 3.729865 | 2.369957 | 0.018754 | 0.049171 | -3.97239 |
| KCTD13    | -0.72219 | 4.850075 | -2.36987 | 0.018758 | 0.049173 | -4.31554 |
| PECAM1    | 2.107048 | 0.602976 | 2.369295 | 0.018787 | 0.049227 | -3.42249 |
| GPR109B   | 0.814737 | 3.765022 | 2.369363 | 0.018783 | 0.049227 | -3.93139 |
| CDKN2C    | 0.475956 | 4.381137 | 2.369236 | 0.01879  | 0.049227 | -4.1212  |
| MEMO1     | -0.3932  | 4.01164  | -2.36891 | 0.018806 | 0.049261 | -4.19188 |
| PTPN4     | 0.89827  | 0.773896 | 2.368815 | 0.01881  | 0.049263 | -3.47615 |
| PPM1J     |          |          |          |          |          |          |



|              |        |          |          |          |          |          |          |
|--------------|--------|----------|----------|----------|----------|----------|----------|
| GFI1         |        | 1.198339 | 1.051768 | 2.368537 | 0.018824 | 0.04929  | -3.47625 |
| RPE          |        | 0.390766 | 5.015612 | 2.368379 | 0.018832 | 0.049301 | -4.23563 |
| GPX1         |        | 0.482085 | 6.624586 | 2.366759 | 0.018912 | 0.049502 | -4.35976 |
|              | 15-Sep | 0.32932  | 6.765686 | 2.366546 | 0.018923 | 0.04952  | -4.36622 |
| CCDC23       |        | 0.480274 | 2.891221 | 2.366436 | 0.018928 | 0.049523 | -3.82586 |
| TANC2        |        | 0.756249 | 6.14114  | 2.36638  | 0.018931 | 0.049523 | -4.32103 |
| IGSF9        |        | 1.353235 | 5.338484 | 2.366233 | 0.018938 | 0.049533 | -4.15082 |
| ARVCF        |        | -0.54093 | 3.59512  | -2.36532 | 0.018984 | 0.049643 | -4.15272 |
| ARNTL2       |        | 1.096696 | 4.703678 | 2.364783 | 0.019011 | 0.049703 | -4.08128 |
| LONP2        |        | -0.38274 | 6.082665 | -2.36387 | 0.019056 | 0.049813 | -4.37176 |
| NECAP1       |        | -0.33144 | 4.817723 | -2.36334 | 0.019082 | 0.049873 | -4.29676 |
| AKAP1        |        | -0.62053 | 6.546821 | -2.36305 | 0.019097 | 0.049902 | -4.37176 |
| CPT1B        |        | -0.58678 | 3.719213 | -2.3625  | 0.019125 | 0.049964 | -4.18818 |
| ZNF837       |        | -0.6316  | 1.158303 | -2.36234 | 0.019133 | 0.049976 | -3.71516 |
| SLC38A10     |        | -0.34616 | 6.831676 | -2.36219 | 0.01914  | 0.049987 | -4.37325 |
| FDPS         |        | 0.423548 | 6.206714 | 2.36198  | 0.019151 | 0.049995 | -4.35597 |
| LBR          |        | 0.541628 | 6.684212 | 2.36203  | 0.019148 | 0.049995 | -4.37069 |
| ZRSR2        |        | -0.47123 | 2.773796 | -2.36178 | 0.019161 | 0.050007 | -3.9767  |
| FKBP8        |        | -0.36992 | 7.581909 | -2.36175 | 0.019162 | 0.050007 | -4.35759 |
| SMPDL3A      |        | -0.69224 | 3.84599  | -2.36104 | 0.019198 | 0.05009  | -4.22277 |
| LOC440905    |        | 2.744173 | 0.422929 | 2.360787 | 0.019211 | 0.050114 | -3.44045 |
| PDSS2        |        | -0.38229 | 4.299426 | -2.36059 | 0.019221 | 0.050131 | -4.24939 |
| C5orf15      |        | 0.425536 | 5.9561   | 2.360334 | 0.019234 | 0.050155 | -4.34383 |
| NDUFS6       |        | 0.543911 | 5.379032 | 2.360215 | 0.01924  | 0.050161 | -4.28082 |
| PDXDC1       |        | -0.52148 | 7.09796  | -2.35988 | 0.019256 | 0.050196 | -4.37028 |
| CNP          |        | 0.470375 | 6.281436 | 2.359696 | 0.019266 | 0.050211 | -4.36287 |
| NOB1         |        | 0.435801 | 5.82124  | 2.359125 | 0.019295 | 0.050277 | -4.33581 |
| MYLIP        |        | -0.68846 | 4.453057 | -2.35876 | 0.019313 | 0.050316 | -4.30312 |
| EIF3I        |        | 0.335632 | 7.139897 | 2.357532 | 0.019375 | 0.050468 | -4.38782 |
| UBXN2A       |        | 0.408269 | 4.283402 | 2.357411 | 0.019381 | 0.050475 | -4.14128 |
| PRKX         |        | 0.872529 | 5.363824 | 2.356979 | 0.019403 | 0.050522 | -4.25113 |
| SEC11C       |        | -0.60912 | 4.225982 | -2.35644 | 0.019431 | 0.050584 | -4.27357 |
| FLCN         |        | -0.35311 | 4.863985 | -2.35556 | 0.019476 | 0.050688 | -4.3211  |
| PLXNA1       |        | 0.71759  | 7.719612 | 2.355516 | 0.019478 | 0.050688 | -4.38929 |
| NAA40        |        | 0.379169 | 4.811199 | 2.354443 | 0.019532 | 0.050821 | -4.24186 |
| LINGO1       |        | 1.25107  | 2.150457 | 2.354279 | 0.019541 | 0.050833 | -3.63262 |
| GPATCH2      |        | 0.395623 | 4.191723 | 2.35421  | 0.019544 | 0.050833 | -4.13101 |
| FAM36A       |        | -0.41011 | 4.932461 | -2.35411 | 0.019549 | 0.050836 | -4.33569 |
| STXBP4       |        | -0.47969 | 3.030212 | -2.35375 | 0.019568 | 0.050875 | -4.05142 |
| CXorf23      |        | -0.43622 | 3.224522 | -2.35341 | 0.019585 | 0.050901 | -4.08463 |
| TRIM37       |        | 0.391984 | 5.242486 | 2.353448 | 0.019583 | 0.050901 | -4.29669 |
| CCDC9        |        | -0.31298 | 4.260419 | -2.35314 | 0.019599 | 0.050928 | -4.25383 |
| MSX2         |        | 1.454618 | 2.592707 | 2.352569 | 0.019628 | 0.050994 | -3.67201 |
| RNF208       |        | -0.79439 | 2.63988  | -2.35234 | 0.01964  | 0.051016 | -4.03045 |
| CD63         |        | -0.48544 | 7.937885 | -2.35183 | 0.019667 | 0.051074 | -4.36633 |
| ADK          |        | 0.528093 | 5.223887 | 2.351644 | 0.019676 | 0.051078 | -4.28475 |
| DNAJC14      |        | 0.286226 | 5.484171 | 2.351639 | 0.019676 | 0.051078 | -4.335   |
| TTC19        |        | -0.38925 | 5.332281 | -2.35159 | 0.019679 | 0.051078 | -4.371   |
| NBPF14       |        | -0.5385  | 4.083831 | -2.35097 | 0.01971  | 0.05115  | -4.26196 |
| IL1RL2       |        | 1.159495 | 1.224029 | 2.350745 | 0.019722 | 0.051171 | -3.53875 |
| FIP1L1       |        | 0.344633 | 4.931886 | 2.350032 | 0.019759 | 0.051257 | -4.27234 |
| COMMD2       |        | 0.450501 | 5.412008 | 2.349855 | 0.019768 | 0.051271 | -4.31744 |
| TSPAN18      |        | -1.00417 | 4.617999 | -2.34924 | 0.0198   | 0.051345 | -4.36372 |
| ZNF519       |        | 0.806093 | 1.380792 | 2.349165 | 0.019804 | 0.051345 | -3.5996  |
| WWTR1        |        | -0.77846 | 5.650463 | -2.349   | 0.019812 | 0.051358 | -4.40364 |
| C8orf55      |        | 0.708584 | 5.679751 | 2.348638 | 0.019831 | 0.051396 | -4.32324 |
| TBC1D5       |        | -0.3857  | 6.203723 | -2.34698 | 0.019917 | 0.05161  | -4.41196 |
| LOC100170939 |        | -0.52997 | 3.077354 | -2.34667 | 0.019933 | 0.051642 | -4.087   |

|          |          |          |          |          |          |          |
|----------|----------|----------|----------|----------|----------|----------|
| SIRT2    | -0.39465 | 5.492869 | -2.34623 | 0.019956 | 0.051691 | -4.39274 |
| TCN1     | -1.91433 | 1.62691  | -2.34608 | 0.019964 | 0.051703 | -4.02709 |
| NFKBIB   | 0.416461 | 4.803636 | 2.345952 | 0.01997  | 0.05171  | -4.25555 |
| RPL12    | 0.58344  | 6.725074 | 2.345672 | 0.019985 | 0.051738 | -4.40813 |
| ORC2L    | 0.358425 | 4.801827 | 2.345472 | 0.019995 | 0.051755 | -4.26356 |
| C9orf89  | 0.571512 | 3.958931 | 2.345044 | 0.020018 | 0.051794 | -4.06949 |
| WDR47    | -0.59358 | 4.666132 | -2.34507 | 0.020016 | 0.051794 | -4.34672 |
| GTF3C3   | 0.33008  | 5.312789 | 2.344957 | 0.020022 | 0.051796 | -4.32945 |
| ZNF605   | -0.78889 | 3.848393 | -2.34431 | 0.020056 | 0.051874 | -4.27475 |
| KDM6A    | -0.53734 | 5.385232 | -2.34411 | 0.020066 | 0.051891 | -4.39827 |
| IGJ      | -1.86638 | 4.890652 | -2.34386 | 0.020079 | 0.051915 | -4.41326 |
| ISCA1P1  | -0.38387 | 1.234968 | -2.34359 | 0.020094 | 0.051942 | -3.73566 |
| CIT      | 0.589105 | 5.570218 | 2.343168 | 0.020116 | 0.05199  | -4.33536 |
| ZRANB3   | 0.64212  | 2.181165 | 2.34304  | 0.020123 | 0.051998 | -3.74209 |
| ZMYND19  | 0.518064 | 4.042561 | 2.342482 | 0.020152 | 0.052064 | -4.10273 |
| NDUFA8   | -0.41117 | 4.730569 | -2.34239 | 0.020157 | 0.052067 | -4.343   |
| SNHG11   | 0.461133 | 2.789742 | 2.341921 | 0.020181 | 0.052121 | -3.86535 |
| C14orf79 | 0.534972 | 2.855885 | 2.34146  | 0.020206 | 0.052164 | -3.86663 |
| HOXB3    | 1.058537 | 4.067286 | 2.341466 | 0.020205 | 0.052164 | -4.00648 |
| SLC39A14 | -0.89938 | 7.127413 | -2.34013 | 0.020276 | 0.052336 | -4.40619 |
| TUBD1    | 0.43851  | 3.230893 | 2.339858 | 0.02029  | 0.052354 | -3.95513 |
| NAA20    | 0.581561 | 6.009367 | 2.339848 | 0.020291 | 0.052354 | -4.38419 |
| GAS2L1   | -0.6824  | 5.441716 | -2.33953 | 0.020308 | 0.052389 | -4.41669 |
| RIF1     | 0.44422  | 6.193996 | 2.339071 | 0.020332 | 0.052441 | -4.40651 |
| TFB2M    | 0.46826  | 4.193584 | 2.338989 | 0.020336 | 0.052443 | -4.1525  |
| CD14     | 0.963301 | 5.015581 | 2.338419 | 0.020366 | 0.052511 | -4.22786 |
| KDM2B    | 0.373958 | 5.666693 | 2.337067 | 0.020438 | 0.052686 | -4.37789 |
| TRAP1    | 0.416729 | 6.64809  | 2.336984 | 0.020442 | 0.052688 | -4.42997 |
| PCSK1N   | -1.77724 | 0.601895 | -2.33681 | 0.020451 | 0.052701 | -3.84008 |
| STAG2    | 0.353028 | 7.437976 | 2.336315 | 0.020478 | 0.05276  | -4.43253 |
| SRBD1    | -0.38009 | 4.01224  | -2.33621 | 0.020483 | 0.052765 | -4.26516 |
| NRN1     | -1.09265 | 1.417289 | -2.33598 | 0.020496 | 0.052786 | -3.88015 |
| NANOS1   | -0.48928 | 2.461888 | -2.33472 | 0.020563 | 0.05295  | -3.97849 |
| RNF19B   | 0.540945 | 5.826473 | 2.334583 | 0.02057  | 0.052959 | -4.38423 |
| PLA2G15  | 0.422806 | 4.426331 | 2.334306 | 0.020585 | 0.052984 | -4.21774 |
| VPS13C   | -0.61019 | 6.357625 | -2.33426 | 0.020588 | 0.052984 | -4.44004 |
| TAF12    | 0.470615 | 3.69921  | 2.334103 | 0.020596 | 0.052996 | -4.05873 |
| C17orf28 | -1.55882 | 5.125815 | -2.33386 | 0.020609 | 0.053019 | -4.43756 |
| SIGLEC10 | 1.233674 | 2.161863 | 2.333717 | 0.020617 | 0.053029 | -3.68554 |
| CXorf40A | -0.30834 | 3.242784 | -2.33322 | 0.020643 | 0.053088 | -4.11025 |
| NUDT21   | 0.36104  | 6.856126 | 2.332754 | 0.020668 | 0.053143 | -4.444   |
| FDX1     | -0.47553 | 4.677412 | -2.33247 | 0.020683 | 0.053153 | -4.3657  |
| FGFRL1   | -0.73166 | 5.364367 | -2.33255 | 0.020679 | 0.053153 | -4.43096 |
| PSIP1    | -0.52647 | 5.588358 | -2.33247 | 0.020684 | 0.053153 | -4.43349 |
| SLC16A9  | -1.28333 | 2.542931 | -2.33238 | 0.020688 | 0.053155 | -4.14647 |
| LYSMD2   | 0.566988 | 3.628735 | 2.332071 | 0.020705 | 0.053188 | -4.02993 |
| TNFRSF6B | 1.967247 | 4.041892 | 2.331673 | 0.020726 | 0.053225 | -3.86889 |
| TMBIM1   | -0.59295 | 8.234397 | -2.33166 | 0.020727 | 0.053225 | -4.39881 |
| NAT14    | 0.745694 | 2.280002 | 2.331315 | 0.020746 | 0.053263 | -3.76979 |
| GFPT2    | -1.13463 | 2.754561 | -2.33098 | 0.020764 | 0.053292 | -4.16921 |
| GTF3C2   | 0.31824  | 6.529572 | 2.330969 | 0.020764 | 0.053292 | -4.44299 |
| ARPC5L   | 0.408868 | 5.56942  | 2.330836 | 0.020771 | 0.0533   | -4.38    |
| USP40    | -0.38479 | 5.529438 | -2.32957 | 0.02084  | 0.053466 | -4.43196 |
| SCLT1    | 0.489609 | 3.247468 | 2.329338 | 0.020852 | 0.053486 | -3.97348 |
| ARHGAP27 | 0.703021 | 5.944378 | 2.329283 | 0.020855 | 0.053486 | -4.3933  |
| CSRNP2   | -0.36425 | 5.324825 | -2.32912 | 0.020864 | 0.053499 | -4.42041 |
| MFSD10   | 0.525191 | 5.823468 | 2.328343 | 0.020906 | 0.053597 | -4.39879 |
| CLEC14A  | -0.66315 | 3.389571 | -2.32819 | 0.020915 | 0.053609 | -4.21777 |

|              |          |          |          |          |          |          |
|--------------|----------|----------|----------|----------|----------|----------|
| FNDC4        | -0.77856 | 1.821116 | -2.32778 | 0.020937 | 0.053646 | -3.92323 |
| NIN          | -0.65371 | 5.893861 | -2.32778 | 0.020937 | 0.053646 | -4.45438 |
| PEX11A       | -0.48891 | 1.921273 | -2.32732 | 0.020962 | 0.053692 | -3.89205 |
| PMVK         | -0.47125 | 4.916237 | -2.3273  | 0.020963 | 0.053692 | -4.39963 |
| C19orf73     | 0.68485  | 0.153295 | 2.327145 | 0.020971 | 0.053704 | -3.52151 |
| C5orf45      | -0.55773 | 1.440972 | -2.3264  | 0.021012 | 0.053792 | -3.82825 |
| CLCN6        | -0.41896 | 4.417557 | -2.32632 | 0.021016 | 0.053792 | -4.34624 |
| HERC2        | -0.37226 | 6.849698 | -2.3263  | 0.021017 | 0.053792 | -4.45426 |
| NDST2        | -0.29239 | 4.612518 | -2.32615 | 0.021025 | 0.053803 | -4.35619 |
| GAL3ST4      | 1.094659 | 3.028304 | 2.326078 | 0.021029 | 0.053804 | -3.85116 |
| FAM96B       | 0.469508 | 4.828799 | 2.32443  | 0.021119 | 0.054024 | -4.3017  |
| RRAGB        | -0.44519 | 2.971794 | -2.32356 | 0.021167 | 0.054136 | -4.10202 |
| DDX41        | 0.371739 | 5.723528 | 2.323285 | 0.021182 | 0.054155 | -4.41397 |
| CCNYL1       | -0.49018 | 5.111753 | -2.32329 | 0.021182 | 0.054155 | -4.42602 |
| TLR2         | 1.006351 | 3.932264 | 2.322959 | 0.0212   | 0.054191 | -4.03325 |
| PSENN        | 0.494904 | 5.099368 | 2.322549 | 0.021223 | 0.054238 | -4.3386  |
| KLRAQ1       | -0.30888 | 4.701073 | -2.32212 | 0.021246 | 0.054289 | -4.37683 |
| CAMKK2       | -0.31245 | 5.969614 | -2.32159 | 0.021275 | 0.054353 | -4.46429 |
| NAPB         | -0.46732 | 3.730718 | -2.32151 | 0.02128  | 0.054355 | -4.26554 |
| MAGEF1       | 0.634961 | 5.103935 | 2.320852 | 0.021316 | 0.054427 | -4.32663 |
| CCDC3        | -0.75184 | 4.675247 | -2.32086 | 0.021315 | 0.054427 | -4.415   |
| CCDC146      | -0.71058 | 2.813489 | -2.32066 | 0.021327 | 0.054445 | -4.12397 |
| ZNF791       | -0.35233 | 4.046422 | -2.32048 | 0.021336 | 0.05446  | -4.30328 |
| CDC27        | 0.310438 | 6.295638 | 2.320109 | 0.021357 | 0.054502 | -4.46005 |
| KLK8         | 3.805569 | 1.979988 | 2.319263 | 0.021404 | 0.054612 | -3.53588 |
| TSPAN7       | -1.25327 | 4.029254 | -2.31917 | 0.021409 | 0.054615 | -4.39792 |
| CSF2RA       | 1.195658 | 1.515627 | 2.318564 | 0.021442 | 0.054671 | -3.63976 |
| CCDC136      | -0.91521 | 0.690691 | -2.31856 | 0.021443 | 0.054671 | -3.7821  |
| PLEKHJ1      | -0.48448 | 4.489854 | -2.31865 | 0.021438 | 0.054671 | -4.37696 |
| PSAT1        | 0.847955 | 5.759925 | 2.318169 | 0.021464 | 0.054716 | -4.38633 |
| LOC100128288 | -0.69664 | 0.365617 | -2.31753 | 0.0215   | 0.054797 | -3.71076 |
| HGSNAT       | -0.41081 | 6.934192 | -2.31744 | 0.021505 | 0.054799 | -4.47208 |
| PSMC1        | 0.432879 | 4.590205 | 2.316191 | 0.021574 | 0.054967 | -4.28718 |
| DTD1         | 0.541742 | 4.139485 | 2.316086 | 0.02158  | 0.054967 | -4.17909 |
| USF1         | 0.340977 | 4.853096 | 2.316047 | 0.021582 | 0.054967 | -4.3393  |
| HOXD8        | 1.042008 | 1.375545 | 2.315731 | 0.0216   | 0.055002 | -3.6459  |
| C6orf108     | 0.684993 | 4.545147 | 2.315474 | 0.021614 | 0.055028 | -4.2356  |
| ICT1         | 0.429327 | 4.132759 | 2.315365 | 0.02162  | 0.055034 | -4.20035 |
| NME7         | 0.505468 | 3.199386 | 2.315278 | 0.021625 | 0.055036 | -3.99316 |
| ABCA12       | 4.472926 | 3.316288 | 2.315143 | 0.021633 | 0.055045 | -3.54813 |
| RABL3        | -0.3864  | 4.856551 | -2.31456 | 0.021666 | 0.055115 | -4.41619 |
| MRFAP1       | -0.32281 | 7.122656 | -2.31451 | 0.021668 | 0.055115 | -4.47655 |
| FAM185A      | -0.37178 | 2.321508 | -2.31438 | 0.021675 | 0.055123 | -3.97605 |
| SPTLC3       | -1.04223 | 2.607894 | -2.31336 | 0.021733 | 0.055259 | -4.15815 |
| FGD3         | 0.901954 | 2.799912 | 2.313157 | 0.021744 | 0.055278 | -3.8675  |
| C15orf63     | 0.528923 | 5.680563 | 2.312299 | 0.021792 | 0.055391 | -4.42199 |
| MAP1LC3A     | -0.66342 | 3.453676 | -2.31179 | 0.021821 | 0.055453 | -4.26757 |
| ASAH1        | -0.48651 | 6.686589 | -2.31152 | 0.021836 | 0.055482 | -4.48858 |
| ABI1         | 0.36397  | 6.547624 | 2.31141  | 0.021842 | 0.055488 | -4.48648 |
| ALDH3B1      | -1.09838 | 3.91716  | -2.31014 | 0.021914 | 0.05566  | -4.38995 |
| PILRA        | 1.088833 | 1.128067 | 2.309968 | 0.021924 | 0.055674 | -3.62475 |
| DDX10        | 0.478485 | 4.923909 | 2.309049 | 0.021976 | 0.055796 | -4.34845 |
| SLC35B1      | 0.398444 | 5.232174 | 2.308755 | 0.021992 | 0.055828 | -4.39517 |
| CELSR3       | 1.735075 | 4.170564 | 2.306995 | 0.022092 | 0.056072 | -3.98196 |
| SHOC2        | -0.28085 | 5.890492 | -2.30672 | 0.022108 | 0.056101 | -4.49466 |
| WDR44        | -0.41555 | 4.967357 | -2.30646 | 0.022123 | 0.056129 | -4.447   |
| RBM15B       | -0.33168 | 6.628638 | -2.3062  | 0.022138 | 0.056156 | -4.50338 |
| ZNF510       | -0.38791 | 3.929344 | -2.3057  | 0.022166 | 0.056218 | -4.32221 |

|          |          |          |          |          |          |          |
|----------|----------|----------|----------|----------|----------|----------|
| DEDD     | 0.323684 | 5.429312 | 2.305323 | 0.022188 | 0.056263 | -4.43155 |
| UFSP1    | 0.68182  | 0.463741 | 2.304518 | 0.022234 | 0.056369 | -3.60255 |
| POLR1A   | 0.425973 | 6.0255   | 2.304208 | 0.022251 | 0.056404 | -4.47598 |
| RPS27L   | -0.49338 | 4.775956 | -2.30318 | 0.02231  | 0.056532 | -4.44252 |
| ELF3     | 1.394903 | 7.527274 | 2.303206 | 0.022309 | 0.056532 | -4.50413 |
| TMBIM4   | -0.51551 | 5.237512 | -2.30233 | 0.022359 | 0.056646 | -4.48316 |
| ADH7     | -2.3947  | 1.458097 | -2.30095 | 0.022439 | 0.056837 | -4.18624 |
| LTV1     | 0.365383 | 4.616596 | 2.300788 | 0.022448 | 0.056848 | -4.33628 |
| DENND5A  | -0.61859 | 5.433491 | -2.30067 | 0.022455 | 0.056848 | -4.50199 |
| INSR     | -0.68086 | 6.386887 | -2.30067 | 0.022455 | 0.056848 | -4.51453 |
| NFATC1   | -0.71427 | 4.490161 | -2.30046 | 0.022467 | 0.056868 | -4.44021 |
| AP1AR    | 0.375256 | 4.983007 | 2.299881 | 0.022501 | 0.056942 | -4.3886  |
| ABHD2    | -0.86866 | 8.166627 | -2.29976 | 0.022508 | 0.05695  | -4.4644  |
| NIF3L1   | 0.323825 | 4.410073 | 2.298857 | 0.02256  | 0.057071 | -4.31052 |
| ENY2     | 0.41344  | 4.497115 | 2.29869  | 0.022569 | 0.057086 | -4.31244 |
| S100A7A  | 4.113415 | 0.77803  | 2.298512 | 0.02258  | 0.057101 | -3.57621 |
| IRF7     | 0.935943 | 4.829078 | 2.298389 | 0.022587 | 0.057109 | -4.28464 |
| SERPINB7 | 2.79779  | 1.047187 | 2.297606 | 0.022632 | 0.057193 | -3.57889 |
| TTLL1    | -0.53143 | 1.680567 | -2.29762 | 0.022632 | 0.057193 | -3.92686 |
| PEX3     | -0.35655 | 4.066681 | -2.29768 | 0.022628 | 0.057193 | -4.35728 |
| SCN3B    | -1.06973 | 0.418008 | -2.29749 | 0.022639 | 0.0572   | -3.80704 |
| WDR72    | 3.507308 | 4.746794 | 2.297417 | 0.022643 | 0.0572   | -3.83294 |
| RPL30    | 0.398507 | 8.97048  | 2.297292 | 0.022651 | 0.057208 | -4.48115 |
| STX8     | -0.38114 | 3.546394 | -2.29714 | 0.02266  | 0.05722  | -4.26923 |
| LYRM1    | -0.48979 | 4.141928 | -2.29707 | 0.022664 | 0.05722  | -4.38497 |
| CAPN8    | -2.30521 | 0.278475 | -2.29642 | 0.022701 | 0.057305 | -3.93528 |
| VWA2     | -1.26805 | 2.568896 | -2.29594 | 0.02273  | 0.057366 | -4.22211 |
| LIF      | 1.652715 | 3.568819 | 2.295178 | 0.022774 | 0.057467 | -3.92176 |
| FLRT3    | -1.36092 | 3.225314 | -2.29352 | 0.022871 | 0.057702 | -4.36331 |
| PHF21A   | -0.41233 | 5.226959 | -2.29342 | 0.022877 | 0.057706 | -4.49679 |
| PCGF6    | 0.387274 | 3.011492 | 2.292968 | 0.022903 | 0.057763 | -4.02695 |
| PCDHB8   | 1.626945 | 0.74186  | 2.292542 | 0.022928 | 0.057806 | -3.58818 |
| LTB4R    | 1.589344 | 4.759709 | 2.292503 | 0.022931 | 0.057806 | -4.16251 |
| LLPH     | 0.49884  | 4.692629 | 2.292468 | 0.022933 | 0.057806 | -4.34763 |
| ADAP2    | 0.861635 | 3.155646 | 2.291831 | 0.02297  | 0.057858 | -3.97893 |
| DOCK2    | -0.95503 | 3.221013 | -2.29184 | 0.02297  | 0.057858 | -4.31377 |
| SSPN     | -0.85005 | 4.162134 | -2.29193 | 0.022964 | 0.057858 | -4.43786 |
| PNPLA2   | -0.5913  | 6.787838 | -2.29184 | 0.02297  | 0.057858 | -4.52909 |
| SURF2    | 0.548386 | 3.517245 | 2.29135  | 0.022999 | 0.057915 | -4.10071 |
| TMEM165  | 0.354495 | 6.259869 | 2.29124  | 0.023005 | 0.057915 | -4.52159 |
| SLC9A1   | -0.58676 | 7.093109 | -2.2913  | 0.023002 | 0.057915 | -4.52406 |
| RASSF6   | -1.1474  | 3.866696 | -2.29037 | 0.023056 | 0.058031 | -4.4302  |
| VEZF1    | -0.39458 | 6.043995 | -2.29031 | 0.02306  | 0.058031 | -4.5376  |
| THBS4    | -1.7908  | 0.946107 | -2.28982 | 0.023089 | 0.058094 | -4.01185 |
| TCEA2    | -0.72453 | 2.575194 | -2.2895  | 0.023108 | 0.058132 | -4.14798 |
| DTNBP1   | -0.39773 | 3.295673 | -2.28925 | 0.023123 | 0.058159 | -4.23683 |
| ARHGDIB  | 0.713947 | 5.729235 | 2.288983 | 0.023139 | 0.058188 | -4.46248 |
| BLOC1S1  | -0.38387 | 4.946284 | -2.28821 | 0.023184 | 0.058292 | -4.48327 |
| OSTC     | 0.34337  | 5.721359 | 2.287595 | 0.023221 | 0.058374 | -4.49576 |
| UNC119   | 0.537333 | 4.289622 | 2.287378 | 0.023234 | 0.058396 | -4.27572 |
| IGSF9B   | -1.24202 | 1.310327 | -2.28666 | 0.023277 | 0.058493 | -3.99433 |
| EFCAB4B  | 1.311031 | 2.547701 | 2.286366 | 0.023294 | 0.058513 | -3.82974 |
| METTL11A | 0.466331 | 3.758734 | 2.286313 | 0.023297 | 0.058513 | -4.1772  |
| SFRS17A  | -0.42488 | 5.265726 | -2.28635 | 0.023295 | 0.058513 | -4.51559 |
| KIAA1310 | -0.25336 | 6.2976   | -2.28622 | 0.023303 | 0.058517 | -4.54862 |
| KBTBD8   | -0.66028 | 1.623324 | -2.28592 | 0.023321 | 0.058552 | -3.96167 |
| RPS3A    | -0.42779 | 6.941181 | -2.28572 | 0.023333 | 0.058569 | -4.54265 |
| YPEL5    | -0.36054 | 6.062674 | -2.28566 | 0.023336 | 0.058569 | -4.54778 |

|              |          |          |          |          |          |          |
|--------------|----------|----------|----------|----------|----------|----------|
| WDR90        | 0.520992 | 5.251448 | 2.285511 | 0.023345 | 0.058581 | -4.43663 |
| TRPT1        | -0.37311 | 3.936658 | -2.2847  | 0.023394 | 0.058693 | -4.3668  |
| TRIM44       | -0.40419 | 6.218963 | -2.28448 | 0.023407 | 0.058714 | -4.55289 |
| HCK          | 1.140371 | 3.20894  | 2.283897 | 0.023442 | 0.058792 | -3.96636 |
| PUSL1        | 0.52781  | 3.590143 | 2.283502 | 0.023465 | 0.058834 | -4.1371  |
| CCDC14       | 0.485781 | 5.450681 | 2.283475 | 0.023467 | 0.058834 | -4.46697 |
| GK           | 1.012614 | 3.214208 | 2.282682 | 0.023515 | 0.058932 | -3.98382 |
| LEPREL1      | -1.2244  | 4.523276 | -2.28272 | 0.023513 | 0.058932 | -4.51887 |
| SUZ12P       | 0.501304 | 2.667416 | 2.282261 | 0.02354  | 0.058985 | -3.97177 |
| BCL2L13      | -0.42066 | 6.004868 | -2.28189 | 0.023563 | 0.059029 | -4.55601 |
| ABCF1        | 0.288533 | 6.748584 | 2.281826 | 0.023566 | 0.059029 | -4.5579  |
| LOC285830    | -0.72163 | 0.196309 | -2.28173 | 0.023572 | 0.059034 | -3.76776 |
| CNPY2        | 0.43415  | 5.297574 | 2.2815   | 0.023586 | 0.059048 | -4.45979 |
| TSC22D2      | -0.55529 | 5.703774 | -2.28149 | 0.023586 | 0.059048 | -4.55239 |
| MPV17L       | -1.30984 | 1.112198 | -2.28094 | 0.02362  | 0.059121 | -3.98173 |
| RGPD3        | -0.40689 | 3.816692 | -2.28068 | 0.023635 | 0.05915  | -4.36159 |
| KIAA1217     | 0.557676 | 7.393606 | 2.28044  | 0.02365  | 0.059175 | -4.56096 |
| FAM136A      | 0.396353 | 5.65292  | 2.280085 | 0.023671 | 0.059218 | -4.50227 |
| NKD2         | 1.795378 | 2.423406 | 2.279988 | 0.023677 | 0.059222 | -3.76983 |
| FRMD4A       | -0.58951 | 4.500001 | -2.27933 | 0.023717 | 0.059312 | -4.47713 |
| NMNAT1       | -0.49024 | 3.061313 | -2.2791  | 0.023731 | 0.059336 | -4.22594 |
| CBS          | -1.29466 | 2.738639 | -2.27877 | 0.023751 | 0.059375 | -4.30494 |
| APOA1BP      | 0.441906 | 6.044748 | 2.276946 | 0.023862 | 0.059641 | -4.53687 |
| C9orf9       | -0.64556 | 2.185086 | -2.27676 | 0.023873 | 0.059658 | -4.0806  |
| ZNF511       | 0.504364 | 4.201261 | 2.27607  | 0.023915 | 0.059753 | -4.28721 |
| NRAS         | 0.530742 | 6.611532 | 2.275595 | 0.023944 | 0.059815 | -4.56352 |
| RWDD4A       | -0.35289 | 4.275757 | -2.27482 | 0.023991 | 0.059922 | -4.43672 |
| CASC2        | -0.62272 | 0.856866 | -2.27427 | 0.024025 | 0.059996 | -3.8629  |
| RFXANK       | 0.429902 | 4.496361 | 2.274079 | 0.024037 | 0.060014 | -4.36415 |
| CCDC30       | -0.76314 | 0.188272 | -2.27363 | 0.024064 | 0.060072 | -3.7888  |
| C12orf29     | -0.40273 | 4.472254 | -2.2735  | 0.024072 | 0.060081 | -4.46901 |
| PMS2CL       | 0.391732 | 2.942212 | 2.273295 | 0.024085 | 0.060102 | -4.05637 |
| C7orf25      | 0.374176 | 3.749567 | 2.272394 | 0.02414  | 0.060219 | -4.22546 |
| SEC24A       | -0.47344 | 6.070097 | -2.27243 | 0.024138 | 0.060219 | -4.57864 |
| ZSCAN5A      | 0.581504 | 1.918708 | 2.27212  | 0.024157 | 0.06025  | -3.86698 |
| GSTM2        | -1.30738 | 3.439869 | -2.27194 | 0.024168 | 0.060256 | -4.43946 |
| PLBD1        | 1.02938  | 5.854209 | 2.272005 | 0.024164 | 0.060256 | -4.48255 |
| MRPS5        | 0.328029 | 5.408659 | 2.271386 | 0.024202 | 0.060331 | -4.50415 |
| DCPS         | 0.601977 | 3.704928 | 2.271234 | 0.024212 | 0.060343 | -4.17446 |
| CHST6        | 1.279971 | 1.654213 | 2.270843 | 0.024236 | 0.060393 | -3.75231 |
| HES2         | 4.006173 | 3.549564 | 2.270153 | 0.024278 | 0.060488 | -3.68462 |
| EVL          | -0.72674 | 4.972493 | -2.27005 | 0.024285 | 0.060493 | -4.5498  |
| GIYD2        | 0.598008 | 5.026398 | 2.269904 | 0.024294 | 0.060505 | -4.43334 |
| MED10        | 0.485557 | 4.303843 | 2.269806 | 0.0243   | 0.060509 | -4.32639 |
| GBP5         | 2.200636 | 3.754224 | 2.269721 | 0.024305 | 0.060511 | -3.92947 |
| SUPT3H       | 0.584036 | 2.449723 | 2.268893 | 0.024356 | 0.060628 | -3.95465 |
| LOC100286793 | 0.571518 | 2.616163 | 2.268562 | 0.024377 | 0.060669 | -3.98328 |
| FAM116A      | -0.33317 | 5.029246 | -2.26833 | 0.024391 | 0.060693 | -4.53096 |
| DKK2         | 1.346805 | 0.430183 | 2.268166 | 0.024401 | 0.060694 | -3.63818 |
| SRGAP3       | -0.83114 | 3.070812 | -2.26819 | 0.0244   | 0.060694 | -4.31756 |
| TBK1         | 0.361947 | 5.151949 | 2.26812  | 0.024404 | 0.060694 | -4.4807  |
| YRDC         | 0.387019 | 4.249504 | 2.267961 | 0.024414 | 0.060707 | -4.33742 |
| UBE2V1       | 0.335506 | 7.225407 | 2.26782  | 0.024423 | 0.060718 | -4.58867 |
| IMP4         | 0.362998 | 5.021951 | 2.267268 | 0.024457 | 0.060793 | -4.46691 |
| DUSP7        | 0.915314 | 6.072982 | 2.266957 | 0.024477 | 0.06083  | -4.5269  |
| CDC42BPB     | -0.38963 | 7.977051 | -2.26627 | 0.024519 | 0.060925 | -4.55984 |
| TCTA         | -0.45451 | 4.531588 | -2.26598 | 0.024538 | 0.06096  | -4.49667 |
| CAPN5        | -1.52504 | 5.594028 | -2.2658  | 0.024549 | 0.060976 | -4.58999 |

|          |          |          |          |          |          |          |
|----------|----------|----------|----------|----------|----------|----------|
| KLF6     | -0.59588 | 7.512537 | -2.26533 | 0.024578 | 0.061038 | -4.5706  |
| BAIAP2L2 | 2.342936 | 3.968425 | 2.264653 | 0.02462  | 0.061133 | -3.94667 |
| GABBR1   | -0.72132 | 4.120685 | -2.26445 | 0.024633 | 0.061154 | -4.48084 |
| GNA15    | 1.813018 | 4.834202 | 2.263956 | 0.024664 | 0.061216 | -4.19899 |
| KDELR1   | 0.346086 | 7.732481 | 2.263909 | 0.024667 | 0.061216 | -4.58882 |
| LTBR     | 0.441052 | 7.194942 | 2.263646 | 0.024683 | 0.061246 | -4.5989  |
| MAST4    | -0.90517 | 6.008685 | -2.26345 | 0.024696 | 0.061266 | -4.59852 |
| PTPRZ1   | -1.9204  | 3.990244 | -2.26305 | 0.024721 | 0.061317 | -4.56146 |
| ATXN1    | -0.47664 | 5.626905 | -2.26293 | 0.024728 | 0.061325 | -4.58866 |
| RBM33    | -0.32546 | 6.096888 | -2.26201 | 0.024786 | 0.061457 | -4.60016 |
| PWP1     | 0.305721 | 5.454022 | 2.261583 | 0.024813 | 0.061513 | -4.53252 |
| CARD8    | -0.50853 | 4.092642 | -2.26131 | 0.02483  | 0.061539 | -4.45973 |
| KIAA0247 | -0.47122 | 6.579011 | -2.26128 | 0.024832 | 0.061539 | -4.60214 |
| PPP2CB   | -0.37023 | 6.333468 | -2.26106 | 0.024846 | 0.061562 | -4.60505 |
| C12orf49 | -0.47143 | 5.063124 | -2.26094 | 0.024854 | 0.06157  | -4.55969 |
| RDH16    | 1.420424 | 0.011487 | 2.260333 | 0.024892 | 0.061632 | -3.65269 |
| ST3GAL2  | 0.695044 | 4.704451 | 2.260341 | 0.024892 | 0.061632 | -4.388   |
| HUS1     | 0.396354 | 4.607574 | 2.260349 | 0.024891 | 0.061632 | -4.41937 |
| LMAN1    | -0.45109 | 7.438444 | -2.2599  | 0.024919 | 0.061688 | -4.58818 |
| LYPD1    | 1.386115 | 1.007522 | 2.259662 | 0.024934 | 0.061715 | -3.68934 |
| KHDRBS3  | -0.9388  | 1.728094 | -2.25943 | 0.024949 | 0.06173  | -4.08098 |
| SOX12    | 0.704753 | 5.170844 | 2.259457 | 0.024947 | 0.06173  | -4.46409 |
| TMEM115  | -0.31098 | 4.995079 | -2.25923 | 0.024962 | 0.061739 | -4.546   |
| SGK1     | -0.9954  | 7.290408 | -2.25927 | 0.024959 | 0.061739 | -4.57966 |
| ZNF234   | -0.47676 | 2.81524  | -2.25884 | 0.024987 | 0.06179  | -4.21629 |
| MZF1     | -0.5066  | 4.386208 | -2.25874 | 0.024993 | 0.061794 | -4.50135 |
| S1PR5    | 2.793914 | 1.8384   | 2.258319 | 0.025019 | 0.061827 | -3.66436 |
| MNAT1    | 0.468429 | 3.663222 | 2.258329 | 0.025019 | 0.061827 | -4.21958 |
| RPL37    | 0.555288 | 8.926857 | 2.258442 | 0.025012 | 0.061827 | -4.57341 |
| HMGN1    | 0.399657 | 6.550069 | 2.258139 | 0.025031 | 0.061845 | -4.60397 |
| KIF1B    | -0.41641 | 6.773638 | -2.25788 | 0.025048 | 0.061875 | -4.60743 |
| OXNAD1   | -0.39947 | 3.215716 | -2.25731 | 0.025084 | 0.061942 | -4.28908 |
| DRAP1    | 0.559037 | 5.579965 | 2.257313 | 0.025083 | 0.061942 | -4.53209 |
| SMARCB1  | 0.381354 | 6.090864 | 2.256406 | 0.025141 | 0.062073 | -4.58856 |
| ECSCR    | -0.70528 | 0.975636 | -2.2559  | 0.025173 | 0.062142 | -3.93215 |
| ZNF226   | -0.45805 | 3.225978 | -2.25558 | 0.025194 | 0.062181 | -4.30671 |
| VEZT     | 0.331896 | 6.211393 | 2.255168 | 0.02522  | 0.062235 | -4.60007 |
| JAZF1    | -0.5961  | 3.734844 | -2.25414 | 0.025286 | 0.062387 | -4.43585 |
| CHIC2    | 0.460196 | 3.379761 | 2.25358  | 0.025322 | 0.062464 | -4.17262 |
| MRPL48   | 0.598411 | 4.280857 | 2.252757 | 0.025375 | 0.062583 | -4.33714 |
| CKMT1B   | 1.230571 | 5.827651 | 2.252332 | 0.025402 | 0.06264  | -4.49968 |
| DDA1     | 0.308381 | 5.691041 | 2.251824 | 0.025435 | 0.062698 | -4.57486 |
| DDX54    | 0.318177 | 6.481544 | 2.251849 | 0.025433 | 0.062698 | -4.61802 |
| PYGO2    | 0.290284 | 5.959462 | 2.25072  | 0.025506 | 0.062852 | -4.59812 |
| ARRDC3   | -0.53574 | 6.060517 | -2.25071 | 0.025506 | 0.062852 | -4.62691 |
| MBD1     | -0.38075 | 5.70086  | -2.25054 | 0.025517 | 0.062868 | -4.61554 |
| MYD88    | 0.473903 | 6.5531   | 2.250475 | 0.025522 | 0.062868 | -4.61873 |
| TBC1D2   | 0.914228 | 5.46635  | 2.249039 | 0.025614 | 0.063086 | -4.50044 |
| RNF141   | -0.54065 | 5.929926 | -2.24858 | 0.025644 | 0.063148 | -4.62987 |
| PRKCD    | -0.51143 | 5.983836 | -2.24759 | 0.025708 | 0.063294 | -4.63251 |
| ZBTB43   | -0.42865 | 4.831802 | -2.24718 | 0.025735 | 0.06335  | -4.56676 |
| SIPA1L3  | 0.488236 | 7.300377 | 2.24689  | 0.025754 | 0.063385 | -4.63522 |
| HSPG2    | -0.68606 | 9.525621 | -2.24602 | 0.02581  | 0.063512 | -4.54319 |
| CCT8     | 0.358719 | 6.797183 | 2.245813 | 0.025824 | 0.063535 | -4.63698 |
| PGM2L1   | 1.11538  | 4.697324 | 2.24574  | 0.025829 | 0.063535 | -4.3393  |
| GNRHR2   | -0.46443 | 3.967836 | -2.24552 | 0.025843 | 0.06356  | -4.47207 |
| CDK17    | -0.39624 | 5.233794 | -2.24514 | 0.025868 | 0.06361  | -4.60283 |
| B3GAT3   | 0.451065 | 4.200696 | 2.243792 | 0.025956 | 0.063804 | -4.36683 |

|           |          |          |          |          |          |          |
|-----------|----------|----------|----------|----------|----------|----------|
| ATP5G3    | -0.42077 | 7.232477 | -2.24381 | 0.025955 | 0.063804 | -4.6291  |
| C6orf153  | 0.443057 | 5.312711 | 2.243167 | 0.025997 | 0.063893 | -4.54515 |
| FAM40A    | -0.29185 | 4.872418 | -2.24272 | 0.026026 | 0.063954 | -4.56886 |
| NOL6      | 0.443827 | 6.445372 | 2.242383 | 0.026049 | 0.063997 | -4.63358 |
| KIAA0368  | -0.30636 | 7.316956 | -2.2421  | 0.026067 | 0.064031 | -4.63322 |
| IFIH1     | 0.698246 | 5.224472 | 2.241635 | 0.026098 | 0.064084 | -4.50976 |
| MATN2     | -0.97642 | 4.987075 | -2.2417  | 0.026094 | 0.064084 | -4.62517 |
| ZFH3      | -0.49551 | 6.588995 | -2.24141 | 0.026113 | 0.064109 | -4.6452  |
| ZNF580    | -0.44301 | 4.738173 | -2.24103 | 0.026138 | 0.064159 | -4.57257 |
| TTC32     | 0.639306 | 1.505518 | 2.240496 | 0.026173 | 0.064235 | -3.86996 |
| KLHDC7B   | 2.603416 | 2.471932 | 2.239775 | 0.026221 | 0.06434  | -3.7718  |
| KAT5      | -0.26957 | 5.264681 | -2.23923 | 0.026257 | 0.064406 | -4.6096  |
| COG3      | -0.43282 | 5.364015 | -2.23927 | 0.026254 | 0.064406 | -4.62576 |
| C1QC      | 1.098093 | 5.782261 | 2.238439 | 0.026309 | 0.064523 | -4.54059 |
| THBS2     | 1.303391 | 6.417573 | 2.237936 | 0.026342 | 0.064594 | -4.5883  |
| HOXB6     | 2.252057 | 2.308138 | 2.237068 | 0.0264   | 0.064724 | -3.79013 |
| MEX3D     | 0.512419 | 5.392236 | 2.236789 | 0.026419 | 0.064758 | -4.56117 |
| MC1R      | 0.811503 | 2.53709  | 2.23636  | 0.026447 | 0.064817 | -4.00584 |
| KCTD17    | 0.717368 | 3.050994 | 2.236192 | 0.026458 | 0.064833 | -4.10502 |
| NBPF9     | -0.41711 | 3.378827 | -2.23601 | 0.02647  | 0.064851 | -4.37528 |
| TRIM2     | -0.85455 | 6.895771 | -2.2358  | 0.026484 | 0.064874 | -4.64526 |
| RARG      | 0.885256 | 6.003933 | 2.235495 | 0.026505 | 0.064913 | -4.59204 |
| RNF103    | -0.53593 | 5.64436  | -2.23456 | 0.026567 | 0.065054 | -4.65307 |
| IL1RAP    | 1.121801 | 5.283991 | 2.234081 | 0.026599 | 0.065121 | -4.47998 |
| ACOT11    | -0.68544 | 4.399598 | -2.23364 | 0.026629 | 0.065183 | -4.57449 |
| C1orf124  | 0.399631 | 3.879496 | 2.233008 | 0.026671 | 0.065274 | -4.33433 |
| SYNGR2    | 0.487171 | 7.583505 | 2.232396 | 0.026712 | 0.065363 | -4.66293 |
| CHCHD8    | 0.573623 | 5.059652 | 2.232144 | 0.026729 | 0.065393 | -4.52421 |
| WDR89     | 0.342287 | 3.790512 | 2.231788 | 0.026753 | 0.065441 | -4.32804 |
| ZNF230    | -0.43745 | 1.782868 | -2.23125 | 0.026789 | 0.065505 | -4.07296 |
| SMN2      | 0.419041 | 5.389236 | 2.231214 | 0.026792 | 0.065505 | -4.58208 |
| U2AF1     | 0.327062 | 6.049401 | 2.231185 | 0.026794 | 0.065505 | -4.64415 |
| B4GALT2   | 0.456122 | 5.766867 | 2.231044 | 0.026803 | 0.065517 | -4.61553 |
| FAIM      | 0.496766 | 3.330469 | 2.230942 | 0.02681  | 0.065522 | -4.20492 |
| UFD1L     | 0.339999 | 5.685644 | 2.230476 | 0.026842 | 0.065588 | -4.61859 |
| MAP7      | 0.694463 | 6.114492 | 2.230304 | 0.026853 | 0.065605 | -4.62699 |
| RPA1      | 0.417482 | 6.580937 | 2.229831 | 0.026885 | 0.065671 | -4.66626 |
| SEH1L     | 0.415372 | 5.868214 | 2.22935  | 0.026918 | 0.065739 | -4.63043 |
| TYROBP    | 1.180268 | 4.313332 | 2.229257 | 0.026924 | 0.065743 | -4.28437 |
| ANKRD26   | -0.4811  | 4.151267 | -2.22894 | 0.026945 | 0.065784 | -4.53524 |
| PDE8A     | -0.48232 | 5.49687  | -2.22878 | 0.026956 | 0.065799 | -4.65785 |
| LIX1L     | -0.57208 | 4.428313 | -2.22858 | 0.026969 | 0.065808 | -4.57939 |
| RBM9      | -0.41831 | 6.534468 | -2.2286  | 0.026968 | 0.065808 | -4.67473 |
| AGAP1     | -0.54364 | 4.928215 | -2.22699 | 0.027078 | 0.066061 | -4.62813 |
| FBXL15    | -0.39758 | 3.621732 | -2.22531 | 0.027192 | 0.066328 | -4.44293 |
| FAM92A1   | 0.870915 | 2.30075  | 2.22497  | 0.027215 | 0.066373 | -3.98717 |
| PCK2      | 0.599471 | 4.850814 | 2.224595 | 0.027241 | 0.066424 | -4.50578 |
| MYB       | 2.42137  | 3.020737 | 2.224359 | 0.027257 | 0.066452 | -3.88804 |
| TSPAN31   | -0.33372 | 4.834239 | -2.22374 | 0.027299 | 0.066543 | -4.60964 |
| LOC619207 | -0.74658 | 0.680565 | -2.2235  | 0.027316 | 0.066572 | -3.9615  |
| DAPP1     | 1.41307  | 3.749397 | 2.223404 | 0.027322 | 0.066576 | -4.14158 |
| FAM124A   | -0.90601 | 0.775022 | -2.2232  | 0.027337 | 0.066599 | -3.99999 |
| FAM162A   | -0.54433 | 5.50635  | -2.22268 | 0.027372 | 0.066674 | -4.67387 |
| ZNF639    | 0.474302 | 5.288612 | 2.221948 | 0.027422 | 0.066754 | -4.58564 |
| MRPS10    | 0.436773 | 5.852577 | 2.221957 | 0.027422 | 0.066754 | -4.64364 |
| HM13      | 0.368173 | 7.129684 | 2.221924 | 0.027424 | 0.066754 | -4.69007 |
| CDC37     | 0.304294 | 6.932285 | 2.221926 | 0.027424 | 0.066754 | -4.69039 |
| FOLH1     | 1.525225 | 1.124882 | 2.221641 | 0.027443 | 0.066766 | -3.76694 |

|           |          |          |          |          |          |          |
|-----------|----------|----------|----------|----------|----------|----------|
| CAPRIN2   | -0.55836 | 4.181656 | -2.22165 | 0.027442 | 0.066766 | -4.5635  |
| SELM      | -0.72456 | 4.856893 | -2.2217  | 0.027439 | 0.066766 | -4.64706 |
| PARP16    | -0.32767 | 3.53663  | -2.22148 | 0.027455 | 0.066782 | -4.42269 |
| RAG1AP1   | 0.516155 | 4.784464 | 2.220931 | 0.027492 | 0.066862 | -4.51527 |
| DPY19L4   | -0.39117 | 5.722866 | -2.21905 | 0.027622 | 0.067162 | -4.6852  |
| CNN2      | 0.576134 | 7.209752 | 2.219004 | 0.027625 | 0.067162 | -4.69646 |
| OSR2      | 0.961457 | 3.092953 | 2.218856 | 0.027636 | 0.067175 | -4.11    |
| CRKL      | 0.425355 | 7.111399 | 2.218575 | 0.027655 | 0.067211 | -4.69757 |
| NID2      | 1.049111 | 4.867173 | 2.218411 | 0.027666 | 0.067227 | -4.4462  |
| WNT7B     | 4.556775 | 4.217251 | 2.217399 | 0.027737 | 0.067374 | -3.81218 |
| JMJD1C    | -0.4346  | 6.624527 | -2.21744 | 0.027734 | 0.067374 | -4.69758 |
| DNAH2     | 2.23109  | 0.900287 | 2.216861 | 0.027774 | 0.067453 | -3.74685 |
| IRF1      | 0.719203 | 6.00804  | 2.216691 | 0.027786 | 0.06747  | -4.64635 |
| TTC5      | 0.401781 | 3.240077 | 2.216089 | 0.027828 | 0.06756  | -4.23547 |
| SART1     | 0.307753 | 6.159955 | 2.215733 | 0.027852 | 0.067608 | -4.68444 |
| DLX5      | 2.743835 | 1.093939 | 2.215159 | 0.027892 | 0.067694 | -3.75122 |
| TIMM10    | 0.472524 | 3.926127 | 2.214981 | 0.027905 | 0.0677   | -4.36863 |
| RFWD2     | 0.296436 | 5.653186 | 2.215035 | 0.027901 | 0.0677   | -4.6527  |
| TGFB1     | 0.847827 | 6.620701 | 2.21464  | 0.027929 | 0.067746 | -4.68495 |
| IRF6      | 1.001824 | 6.475893 | 2.214192 | 0.02796  | 0.06781  | -4.66751 |
| TMEM151B  | -0.71997 | 0.355777 | -2.21386 | 0.027983 | 0.067854 | -3.93306 |
| ARID3A    | 1.045107 | 3.473327 | 2.213786 | 0.027988 | 0.067856 | -4.17316 |
| HARS      | -0.2927  | 5.493729 | -2.21244 | 0.028083 | 0.068073 | -4.68461 |
| MTPAP     | 0.347739 | 4.800187 | 2.211999 | 0.028114 | 0.068136 | -4.56041 |
| EIF1AX    | -0.3885  | 6.26117  | -2.2115  | 0.028148 | 0.068208 | -4.71278 |
| SLC23A2   | -0.45193 | 5.560165 | -2.2114  | 0.028156 | 0.068215 | -4.69727 |
| ZNF41     | -0.37451 | 3.753737 | -2.21097 | 0.028186 | 0.068275 | -4.49644 |
| TRPV4     | 1.947187 | 3.114351 | 2.210663 | 0.028207 | 0.068316 | -3.99576 |
| IRAK2     | 1.277348 | 3.86236  | 2.210448 | 0.028223 | 0.068329 | -4.21424 |
| FAM65A    | -0.48043 | 6.045743 | -2.21047 | 0.028221 | 0.068329 | -4.71366 |
| TBCCD1    | 0.407846 | 4.093776 | 2.209564 | 0.028285 | 0.068444 | -4.42785 |
| DYNLL2    | -0.38834 | 4.780102 | -2.2097  | 0.028275 | 0.068444 | -4.63985 |
| NAPG      | -0.36738 | 5.30415  | -2.20963 | 0.028281 | 0.068444 | -4.6828  |
| RC3H1     | -0.32397 | 6.196993 | -2.20865 | 0.02835  | 0.068589 | -4.71788 |
| ZC3H7A    | -0.27551 | 5.522629 | -2.20852 | 0.028359 | 0.068591 | -4.69388 |
| ZC3H7B    | -0.3376  | 7.019334 | -2.2085  | 0.02836  | 0.068591 | -4.71163 |
| CABYR     | 1.713989 | 1.647552 | 2.208285 | 0.028375 | 0.068616 | -3.83478 |
| LOC729020 | 0.405986 | 0.49231  | 2.207804 | 0.02841  | 0.068662 | -3.83681 |
| UBXN11    | 0.535521 | 3.559761 | 2.207853 | 0.028406 | 0.068662 | -4.29265 |
| ZDHHC18   | 0.463053 | 5.19178  | 2.207922 | 0.028401 | 0.068662 | -4.60597 |
| ITPRIPL1  | 1.104541 | 0.506977 | 2.207386 | 0.028439 | 0.068717 | -3.77107 |
| RCOR1     | 0.467493 | 6.542774 | 2.207346 | 0.028442 | 0.068717 | -4.71221 |
| DLG3      | -0.51956 | 5.413243 | -2.20687 | 0.028476 | 0.068788 | -4.70271 |
| DMAP1     | -0.29411 | 4.378322 | -2.20623 | 0.028521 | 0.068885 | -4.59228 |
| DCAF12    | 0.394498 | 6.412279 | 2.206097 | 0.028531 | 0.068896 | -4.71269 |
| THNSL2    | -1.34628 | 2.426162 | -2.20548 | 0.028575 | 0.068986 | -4.41029 |
| PFDN5     | -0.35367 | 6.721928 | -2.20543 | 0.028578 | 0.068986 | -4.72313 |
| NBR1      | -0.3161  | 7.22046  | -2.20526 | 0.02859  | 0.069003 | -4.71491 |
| RGPD4     | -0.37392 | 2.791954 | -2.20466 | 0.028633 | 0.069095 | -4.30797 |
| FZR1      | 0.359228 | 6.0262   | 2.203843 | 0.028691 | 0.069224 | -4.7001  |
| CEACAM6   | 3.122439 | 6.642281 | 2.203492 | 0.028717 | 0.069273 | -4.4454  |
| RPL38     | 0.460952 | 8.518847 | 2.202733 | 0.028771 | 0.069392 | -4.70474 |
| MRPS30    | 0.419435 | 4.905301 | 2.202594 | 0.028781 | 0.069404 | -4.58606 |
| ZNF701    | -0.85515 | 1.807687 | -2.20202 | 0.028822 | 0.069479 | -4.20301 |
| CMTM7     | 1.052277 | 3.713487 | 2.202065 | 0.028819 | 0.069479 | -4.24052 |
| MSTO1     | 0.405416 | 4.674868 | 2.201906 | 0.02883  | 0.069487 | -4.55528 |
| AMFR      | -0.35399 | 6.622852 | -2.20178 | 0.028839 | 0.069497 | -4.73232 |
| RG9MTD2   | -0.41071 | 2.564925 | -2.20163 | 0.02885  | 0.06951  | -4.27275 |



|           |          |          |          |          |          |          |
|-----------|----------|----------|----------|----------|----------|----------|
| PLEKHA7   | -0.83309 | 4.96276  | -2.20117 | 0.028883 | 0.069579 | -4.70408 |
| BCO2      | -0.89768 | 0.319791 | -2.2008  | 0.02891  | 0.069619 | -3.97903 |
| MTMR15    | -0.32792 | 4.746058 | -2.2008  | 0.02891  | 0.069619 | -4.64967 |
| LOC338799 | -0.54859 | 3.209411 | -2.20056 | 0.028927 | 0.069647 | -4.43843 |
| PBX4      | 1.072924 | 0.341269 | 2.200002 | 0.028967 | 0.069733 | -3.77905 |
| PIAS1     | -0.30349 | 5.273552 | -2.19993 | 0.028973 | 0.069734 | -4.69736 |
| GPBP1L1   | -0.24995 | 6.933358 | -2.19979 | 0.028982 | 0.069745 | -4.73335 |
| IARS2     | 0.316501 | 7.291906 | 2.199337 | 0.029015 | 0.069812 | -4.73659 |
| C12orf76  | 0.443729 | 1.80983  | 2.199216 | 0.029024 | 0.069821 | -4.02388 |
| TTLL4     | 0.505172 | 5.326581 | 2.199097 | 0.029032 | 0.06983  | -4.63501 |
| GRAMD4    | -0.44911 | 5.656042 | -2.19894 | 0.029044 | 0.069845 | -4.72782 |
| CMPK2     | 1.137505 | 4.098712 | 2.198796 | 0.029054 | 0.069846 | -4.30874 |
| LRBA      | -0.46033 | 6.734167 | -2.1988  | 0.029054 | 0.069846 | -4.73561 |
| WSB1      | -0.4656  | 6.362511 | -2.19853 | 0.029073 | 0.06988  | -4.74056 |
| CCDC152   | -0.968   | 1.540285 | -2.19825 | 0.029094 | 0.069917 | -4.18024 |
| RBM17     | 0.326619 | 6.146487 | 2.19814  | 0.029102 | 0.069924 | -4.72072 |
| AMOTL1    | -0.79009 | 6.489622 | -2.19797 | 0.029114 | 0.069941 | -4.73626 |
| BEGAIN    | -0.84745 | 0.597007 | -2.1975  | 0.029148 | 0.069989 | -4.01774 |
| RGS10     | 0.602133 | 3.991005 | 2.197396 | 0.029156 | 0.069989 | -4.39629 |
| EFCAB4A   | -1.1833  | 3.017383 | -2.19741 | 0.029154 | 0.069989 | -4.50993 |
| POFUT2    | -0.37508 | 4.519359 | -2.19757 | 0.029143 | 0.069989 | -4.63612 |
| FOXK2     | 0.314756 | 6.633887 | 2.197354 | 0.029159 | 0.069989 | -4.73986 |
| CYP24A1   | 2.972296 | 0.920822 | 2.19638  | 0.029229 | 0.070134 | -3.78897 |
| ZMYND8    | -0.38127 | 6.575483 | -2.19642 | 0.029226 | 0.070134 | -4.74403 |
| ANAPC10   | 0.380477 | 2.417302 | 2.196253 | 0.029239 | 0.070144 | -4.13319 |
| LOC400931 | -0.5852  | 2.473743 | -2.19531 | 0.029307 | 0.070296 | -4.29973 |
| AXIN1     | 0.39715  | 5.669479 | 2.194914 | 0.029336 | 0.070354 | -4.68925 |
| FBXO41    | 0.936771 | 4.323213 | 2.194676 | 0.029353 | 0.070383 | -4.40734 |
| TTC22     | 1.125361 | 4.564963 | 2.194082 | 0.029397 | 0.070475 | -4.41839 |
| TEX264    | -0.38498 | 4.74737  | -2.194   | 0.029403 | 0.070478 | -4.66924 |
| SMAP2     | -0.46594 | 5.472148 | -2.19382 | 0.029416 | 0.070497 | -4.7314  |
| FLJ42627  | -0.61886 | 1.443991 | -2.19341 | 0.029446 | 0.070545 | -4.12431 |
| ACTN4     | 0.369113 | 10.08862 | 2.193468 | 0.029441 | 0.070545 | -4.66921 |
| GOLGA2B   | -0.67256 | 2.55729  | -2.19258 | 0.029507 | 0.070679 | -4.3393  |
| TUFT1     | 0.691429 | 5.283836 | 2.191954 | 0.029552 | 0.070776 | -4.6261  |
| FGD5      | -0.7745  | 3.914533 | -2.19149 | 0.029587 | 0.070846 | -4.6172  |
| BIVM      | -0.42315 | 4.195472 | -2.19074 | 0.029642 | 0.070953 | -4.61619 |
| LAPTM4A   | -0.24995 | 8.078024 | -2.19075 | 0.029641 | 0.070953 | -4.7245  |
| ARHGEF10L | -0.70454 | 5.589902 | -2.19062 | 0.02965  | 0.070961 | -4.75041 |
| TRIB1     | -0.61095 | 6.838325 | -2.19004 | 0.029693 | 0.071051 | -4.74988 |
| TMCO1     | 0.390506 | 6.579117 | 2.189924 | 0.029702 | 0.07106  | -4.7528  |
| PDXDC2    | -0.61562 | 3.925681 | -2.18916 | 0.029758 | 0.071183 | -4.60405 |
| ZNF253    | -0.81787 | 2.520693 | -2.18826 | 0.029824 | 0.071328 | -4.3692  |
| XAF1      | 0.964084 | 5.906204 | 2.187426 | 0.029886 | 0.071465 | -4.67743 |
| HSD17B10  | 0.394818 | 5.439748 | 2.187275 | 0.029897 | 0.071479 | -4.68419 |
| ZNF273    | 0.630018 | 3.014146 | 2.186914 | 0.029924 | 0.071531 | -4.21669 |
| PWWP2B    | -0.43535 | 4.354711 | -2.18663 | 0.029945 | 0.071569 | -4.64573 |
| KIAA1377  | -0.85048 | 2.364848 | -2.18623 | 0.029975 | 0.071628 | -4.34922 |
| FAM101A   | -1.68818 | 2.3527   | -2.18561 | 0.030021 | 0.071725 | -4.4823  |
| PPP3CA    | -0.39363 | 5.99668  | -2.18485 | 0.030077 | 0.071835 | -4.76645 |
| OCIAD1    | -0.35724 | 6.438814 | -2.18491 | 0.030073 | 0.071835 | -4.76989 |
| C12orf11  | 0.529061 | 5.123073 | 2.184522 | 0.030102 | 0.071882 | -4.63991 |
| IPO8      | -0.36696 | 6.243235 | -2.1844  | 0.030111 | 0.071891 | -4.77064 |
| ABT1      | 0.338002 | 4.774434 | 2.183826 | 0.030154 | 0.071981 | -4.61837 |
| UBA7      | -0.68043 | 4.798949 | -2.1837  | 0.030163 | 0.071992 | -4.72021 |
| FAM46A    | -0.79627 | 5.546937 | -2.18347 | 0.03018  | 0.07202  | -4.76646 |
| VPS33B    | -0.29465 | 3.699936 | -2.18331 | 0.030192 | 0.072036 | -4.53049 |
| GOLT1B    | 0.387726 | 5.817345 | 2.182913 | 0.030222 | 0.072095 | -4.72791 |

|           |          |          |          |          |          |          |
|-----------|----------|----------|----------|----------|----------|----------|
| GALK1     | 0.504418 | 3.423767 | 2.182622 | 0.030244 | 0.072122 | -4.32329 |
| TNKS2     | -0.30004 | 6.577518 | -2.18263 | 0.030243 | 0.072122 | -4.77427 |
| GALNS     | 0.541166 | 5.012996 | 2.182549 | 0.030249 | 0.072123 | -4.62844 |
| NPHP3     | -0.42167 | 4.302724 | -2.18227 | 0.03027  | 0.072161 | -4.64819 |
| C6orf170  | 0.633318 | 2.791299 | 2.181813 | 0.030304 | 0.072205 | -4.18594 |
| GABPA     | -0.30246 | 5.21403  | -2.18183 | 0.030303 | 0.072205 | -4.73151 |
| LDHB      | -0.90511 | 7.325647 | -2.1819  | 0.030298 | 0.072205 | -4.74846 |
| THADA     | 0.238619 | 5.817397 | 2.181575 | 0.030322 | 0.072235 | -4.74094 |
| ZNF529    | -0.61037 | 3.861233 | -2.18066 | 0.03039  | 0.072386 | -4.61563 |
| KIF26A    | -0.80769 | 2.9594   | -2.18054 | 0.030399 | 0.072395 | -4.47522 |
| BTAF1     | -0.33753 | 5.985187 | -2.18009 | 0.030433 | 0.072463 | -4.7753  |
| FAM86A    | 0.442621 | 3.834111 | 2.17977  | 0.030458 | 0.072509 | -4.42943 |
| TIGD5     | 0.580554 | 4.047921 | 2.179412 | 0.030485 | 0.072561 | -4.44952 |
| GBE1      | -0.38903 | 4.458453 | -2.1783  | 0.030569 | 0.072737 | -4.67206 |
| KCTD12    | -0.80604 | 6.463409 | -2.17831 | 0.030568 | 0.072737 | -4.77833 |
| ZFP161    | -0.28036 | 3.712645 | -2.178   | 0.030592 | 0.072778 | -4.54348 |
| RALA      | 0.356985 | 6.159342 | 2.17729  | 0.030645 | 0.072893 | -4.7645  |
| NRBF2     | 0.391418 | 4.454622 | 2.176449 | 0.030709 | 0.073032 | -4.57369 |
| KIAA0020  | 0.480886 | 4.881377 | 2.176376 | 0.030714 | 0.073032 | -4.63123 |
| HEPHL1    | 3.439317 | 1.861981 | 2.175654 | 0.030769 | 0.073138 | -3.83438 |
| SNX14     | -0.41072 | 5.725998 | -2.1757  | 0.030766 | 0.073138 | -4.77871 |
| BBS5      | -0.51332 | 2.81152  | -2.17544 | 0.030785 | 0.073164 | -4.40283 |
| ARHGAP29  | -0.81629 | 4.831283 | -2.17519 | 0.030804 | 0.073197 | -4.74998 |
| SLCO3A1   | 0.834287 | 5.497773 | 2.175058 | 0.030814 | 0.073197 | -4.67268 |
| TOP2B     | -0.39966 | 7.036165 | -2.17505 | 0.030815 | 0.073197 | -4.78167 |
| LMX1B     | 2.111258 | 0.481461 | 2.173792 | 0.030911 | 0.0734   | -3.83266 |
| NUDT8     | 0.947156 | 3.058734 | 2.173848 | 0.030906 | 0.0734   | -4.20011 |
| GDPD5     | 1.136453 | 3.180342 | 2.173509 | 0.030932 | 0.073437 | -4.19329 |
| GIPC2     | -1.30768 | 2.127794 | -2.17345 | 0.030937 | 0.073437 | -4.40619 |
| MEX3B     | 0.930256 | 2.055731 | 2.172794 | 0.030987 | 0.073505 | -4.05266 |
| ACYP2     | -0.50965 | 2.182369 | -2.17284 | 0.030983 | 0.073505 | -4.27914 |
| SLC35D1   | -0.48463 | 5.3998   | -2.17288 | 0.03098  | 0.073505 | -4.77298 |
| RBCK1     | 0.371176 | 6.495873 | 2.17299  | 0.030972 | 0.073505 | -4.78689 |
| HSPA2     | -1.02983 | 4.473346 | -2.17253 | 0.031007 | 0.073528 | -4.7426  |
| METAP1    | 0.382161 | 6.179148 | 2.172547 | 0.031006 | 0.073528 | -4.77439 |
| MYOF      | 0.669666 | 7.762383 | 2.172285 | 0.031026 | 0.07356  | -4.79159 |
| C20orf177 | 0.504869 | 3.93472  | 2.171961 | 0.031051 | 0.073607 | -4.4568  |
| NOP16     | 0.48401  | 3.708827 | 2.171247 | 0.031105 | 0.073708 | -4.41364 |
| IFI44     | 1.119831 | 4.860398 | 2.171243 | 0.031106 | 0.073708 | -4.53227 |
| EIF2C2    | 0.527952 | 5.191649 | 2.171194 | 0.031109 | 0.073708 | -4.67665 |
| EPB41L3   | -0.85467 | 3.492965 | -2.17019 | 0.031186 | 0.073878 | -4.61363 |
| IL1F9     | 3.225775 | 0.522684 | 2.169506 | 0.031239 | 0.073991 | -3.84175 |
| C13orf15  | -0.55152 | 4.127599 | -2.1689  | 0.031286 | 0.074089 | -4.66796 |
| MCAM      | -0.70314 | 6.532385 | -2.16836 | 0.031327 | 0.074175 | -4.79995 |
| B4GALNT3  | -1.00407 | 5.399075 | -2.16818 | 0.031341 | 0.074195 | -4.79903 |
| CALM2     | 0.301938 | 8.303721 | 2.168013 | 0.031354 | 0.074213 | -4.78093 |
| SLC7A5    | 0.926456 | 8.457729 | 2.167793 | 0.031371 | 0.07424  | -4.79142 |
| MYOM3     | 2.113033 | 1.407381 | 2.166296 | 0.031487 | 0.074502 | -3.8549  |
| SLC16A1   | 0.715977 | 6.687884 | 2.165584 | 0.031542 | 0.07462  | -4.79797 |
| ZNF469    | 1.429442 | 3.819539 | 2.164783 | 0.031604 | 0.074754 | -4.27448 |
| ZNF643    | 0.707736 | 1.250578 | 2.164596 | 0.031619 | 0.074776 | -3.98491 |
| GPATCH4   | 0.380797 | 5.470768 | 2.163907 | 0.031672 | 0.07489  | -4.73774 |
| IGDCC4    | -0.77435 | 1.988416 | -2.16344 | 0.031709 | 0.074939 | -4.30449 |
| ACTR1A    | -0.30274 | 6.710355 | -2.16348 | 0.031706 | 0.074939 | -4.81334 |
| PSMD8     | 0.338942 | 6.926969 | 2.163549 | 0.0317   | 0.074939 | -4.81505 |
| SLC25A17  | 0.312298 | 4.500261 | 2.163098 | 0.031735 | 0.074976 | -4.6226  |
| RAPGEFL1  | 1.121428 | 6.431448 | 2.163121 | 0.031734 | 0.074976 | -4.76475 |
| PLCXD2    | 0.942957 | 2.568208 | 2.162908 | 0.03175  | 0.074998 | -4.14582 |

|              |          |          |          |          |          |          |
|--------------|----------|----------|----------|----------|----------|----------|
| LHFP         | -0.63388 | 3.776323 | -2.16256 | 0.031778 | 0.07505  | -4.64364 |
| MAPK12       | 1.054078 | 2.925261 | 2.162304 | 0.031797 | 0.075072 | -4.1899  |
| ZNF784       | -0.35629 | 2.708578 | -2.16237 | 0.031792 | 0.075072 | -4.37608 |
| GNLY         | 1.844188 | 1.463312 | 2.161842 | 0.031834 | 0.075125 | -3.89565 |
| IKBK         | 0.40842  | 4.541259 | 2.16176  | 0.03184  | 0.075125 | -4.61787 |
| CEBPD        | -0.62171 | 6.97189  | -2.16174 | 0.031841 | 0.075125 | -4.80702 |
| LYPLA1       | 0.359807 | 6.730167 | 2.161746 | 0.031841 | 0.075125 | -4.81647 |
| RARRES2      | -0.76256 | 4.011627 | -2.16152 | 0.031859 | 0.075153 | -4.69264 |
| CDK7         | 0.431664 | 3.952144 | 2.161253 | 0.03188  | 0.075189 | -4.4965  |
| IGSF1        | -1.0983  | -0.01244 | -2.16094 | 0.031904 | 0.075234 | -4.03979 |
| TMEM37       | -0.84885 | 2.759436 | -2.16051 | 0.031938 | 0.075301 | -4.47933 |
| MIER1        | -0.29914 | 6.059426 | -2.16023 | 0.03196  | 0.075341 | -4.81829 |
| MPHOSPH10    | 0.304908 | 5.243695 | 2.159544 | 0.032014 | 0.075455 | -4.73065 |
| MAFF         | -0.57476 | 5.12595  | -2.15871 | 0.03208  | 0.075585 | -4.79134 |
| AKAP9        | -0.56874 | 7.404157 | -2.15871 | 0.032079 | 0.075585 | -4.80405 |
| C19orf6      | -0.26522 | 6.930432 | -2.15862 | 0.032087 | 0.075588 | -4.82065 |
| TAB3         | -0.4238  | 5.769927 | -2.15846 | 0.032099 | 0.075604 | -4.81709 |
| EMILIN1      | -0.85954 | 5.55771  | -2.1577  | 0.032159 | 0.075733 | -4.82261 |
| RGPD6        | -0.50061 | 5.455062 | -2.15753 | 0.032172 | 0.075752 | -4.80905 |
| SNORA8       | 0.503361 | 4.75991  | 2.157177 | 0.0322   | 0.075805 | -4.64926 |
| STOX1        | -0.91709 | 1.494622 | -2.15692 | 0.03222  | 0.075839 | -4.25309 |
| ATP2C2       | 1.941493 | 3.880281 | 2.156446 | 0.032258 | 0.075915 | -4.22144 |
| FAM65B       | -0.92111 | 1.413259 | -2.15631 | 0.032269 | 0.075928 | -4.24011 |
| TLR6         | 1.160222 | 0.771902 | 2.155747 | 0.032313 | 0.07602  | -3.89942 |
| NDUFS7       | -0.37896 | 5.38011  | -2.15562 | 0.032323 | 0.07603  | -4.80309 |
| LONRF3       | -1.28078 | 1.362834 | -2.15525 | 0.032353 | 0.076087 | -4.28548 |
| KLC3         | 2.510575 | 2.260804 | 2.155048 | 0.032369 | 0.0761   | -3.93108 |
| TNNI1        | 1.014873 | 1.980101 | 2.155043 | 0.032369 | 0.0761   | -4.06246 |
| LOC653653    | -0.54386 | 1.103986 | -2.15471 | 0.032396 | 0.076137 | -4.14376 |
| GUSBL2       | 0.530518 | 2.236917 | 2.154726 | 0.032394 | 0.076137 | -4.16982 |
| UBXN7        | 0.526085 | 5.144267 | 2.154573 | 0.032406 | 0.076149 | -4.70619 |
| GNL3L        | 0.34871  | 6.365979 | 2.15371  | 0.032475 | 0.076298 | -4.82387 |
| EML4         | 0.385419 | 7.058137 | 2.153228 | 0.032513 | 0.076375 | -4.83687 |
| SHANK3       | -0.46685 | 5.564203 | -2.1526  | 0.032564 | 0.07648  | -4.82307 |
| ARFGAP1      | 0.343642 | 6.004952 | 2.152357 | 0.032583 | 0.076512 | -4.80877 |
| RPS7         | 0.486585 | 6.415939 | 2.151671 | 0.032638 | 0.076628 | -4.82504 |
| CUL5         | -0.29689 | 5.414993 | -2.15123 | 0.032673 | 0.076698 | -4.81016 |
| CPNE7        | 1.689469 | 1.047044 | 2.150088 | 0.032764 | 0.0769   | -3.88739 |
| FXR2         | -0.30619 | 5.15289  | -2.14997 | 0.032774 | 0.076909 | -4.79418 |
| THSD1        | 1.046913 | 2.676109 | 2.149171 | 0.032838 | 0.077047 | -4.17763 |
| CEP350       | -0.31053 | 6.612105 | -2.14887 | 0.032862 | 0.07709  | -4.84513 |
| ATXN7L2      | 0.469611 | 2.563629 | 2.147996 | 0.032932 | 0.077231 | -4.24464 |
| ADAMTS17     | -0.84865 | 1.806225 | -2.14799 | 0.032933 | 0.077231 | -4.31489 |
| SH3BGRL3     | 0.497054 | 8.328416 | 2.147109 | 0.033004 | 0.077384 | -4.82899 |
| ZNF266       | -0.39183 | 4.70637  | -2.147   | 0.033013 | 0.077392 | -4.76546 |
| BZW2         | 0.44187  | 6.702315 | 2.146762 | 0.033032 | 0.077424 | -4.84588 |
| NPLOC4       | 0.27934  | 7.410429 | 2.146579 | 0.033047 | 0.077445 | -4.84598 |
| C15orf37     | -0.36469 | 1.475059 | -2.14644 | 0.033058 | 0.07746  | -4.1917  |
| PGBD4        | -0.42529 | 1.114481 | -2.14617 | 0.03308  | 0.077497 | -4.14535 |
| QARS         | -0.39222 | 6.867312 | -2.1454  | 0.033142 | 0.077631 | -4.8475  |
| LOC100133161 | 0.863088 | 3.066954 | 2.145    | 0.033175 | 0.077693 | -4.27436 |
| STAM         | -0.33987 | 5.162422 | -2.14426 | 0.033234 | 0.07782  | -4.80893 |
| ZNF813       | -1.06505 | 0.841843 | -2.14418 | 0.033241 | 0.077822 | -4.1962  |
| NCKAP1       | -0.33408 | 8.301362 | -2.14401 | 0.033255 | 0.077843 | -4.81321 |
| TTPAL        | 0.473342 | 5.311208 | 2.143763 | 0.033275 | 0.077876 | -4.75447 |
| SENP6        | -0.26673 | 6.265631 | -2.14341 | 0.033304 | 0.07793  | -4.85655 |
| SULT1A3      | 0.643674 | 5.008328 | 2.143161 | 0.033324 | 0.077943 | -4.69637 |
| TIAF1        | -0.52207 | 4.584264 | -2.14314 | 0.033326 | 0.077943 | -4.77213 |

|           |          |          |          |          |          |          |
|-----------|----------|----------|----------|----------|----------|----------|
| MUC1      | -1.57988 | 7.02412  | -2.14322 | 0.033319 | 0.077943 | -4.81966 |
| PCDHB9    | 1.003891 | 1.491499 | 2.142747 | 0.033358 | 0.078004 | -4.0274  |
| FAM24B    | 1.031003 | 0.201806 | 2.142138 | 0.033407 | 0.078107 | -3.89442 |
| NOS2      | 2.906    | 1.390322 | 2.141368 | 0.03347  | 0.078227 | -3.9014  |
| PTGR1     | -0.7947  | 5.35166  | -2.14141 | 0.033466 | 0.078227 | -4.84892 |
| APOM      | -0.63437 | 0.271801 | -2.14084 | 0.033513 | 0.078316 | -4.06163 |
| FNDC1     | 2.11544  | 3.643165 | 2.140361 | 0.033552 | 0.078394 | -4.20003 |
| CHFR      | -0.70247 | 4.119249 | -2.13995 | 0.033586 | 0.07846  | -4.74509 |
| HIST1H2BC | 1.157836 | 2.017975 | 2.139368 | 0.033634 | 0.078557 | -4.08535 |
| LOC399744 | -0.67139 | 2.783116 | -2.13926 | 0.033642 | 0.078565 | -4.49916 |
| KIF3C     | 1.0121   | 3.993104 | 2.13919  | 0.033648 | 0.078565 | -4.44209 |
| ZNF839    | -0.33199 | 3.118802 | -2.13909 | 0.033657 | 0.078571 | -4.50776 |
| ALDH16A1  | 0.382215 | 5.180449 | 2.138951 | 0.033668 | 0.078585 | -4.75863 |
| METTL4    | 0.456913 | 3.853797 | 2.13811  | 0.033737 | 0.078721 | -4.51787 |
| STYXL1    | 0.494244 | 4.304875 | 2.138105 | 0.033737 | 0.078721 | -4.60492 |
| KIAA1012  | -0.37714 | 5.924219 | -2.1379  | 0.033754 | 0.078746 | -4.86344 |
| ZNF302    | -0.50156 | 4.101178 | -2.13774 | 0.033768 | 0.078765 | -4.72521 |
| BLOC1S2   | 0.387938 | 4.932933 | 2.137212 | 0.033811 | 0.078853 | -4.73167 |
| COCH      | 2.201818 | 2.358152 | 2.136892 | 0.033837 | 0.078901 | -4.01167 |
| GSDMC     | 3.137365 | 1.425511 | 2.136662 | 0.033856 | 0.078919 | -3.91091 |
| C17orf67  | 0.545847 | 0.864388 | 2.13668  | 0.033855 | 0.078919 | -4.01156 |
| FAM189B   | 0.401702 | 6.083036 | 2.136535 | 0.033867 | 0.07893  | -4.84359 |
| NOS1AP    | -0.75377 | 2.811493 | -2.13606 | 0.033906 | 0.079008 | -4.52476 |
| ZNF503    | -0.69642 | 5.14156  | -2.13584 | 0.033924 | 0.079024 | -4.84679 |
| EPPK1     | 0.91868  | 6.679346 | 2.135842 | 0.033924 | 0.079024 | -4.85171 |
| KIAA1797  | -0.54828 | 5.012513 | -2.13572 | 0.033934 | 0.079034 | -4.82926 |
| PGAM2     | -0.71478 | 0.645481 | -2.13555 | 0.033948 | 0.079041 | -4.13638 |
| C11orf17  | 0.409896 | 3.504596 | 2.135585 | 0.033945 | 0.079041 | -4.45707 |
| WDR1      | -0.33209 | 8.171227 | -2.13483 | 0.034008 | 0.079167 | -4.83689 |
| TWF2      | 0.371304 | 4.749492 | 2.134382 | 0.034045 | 0.079239 | -4.71457 |
| ACBD7     | 1.323071 | 1.077861 | 2.134193 | 0.03406  | 0.079263 | -3.95897 |
| GRAP      | 0.86806  | 1.377858 | 2.134004 | 0.034076 | 0.079286 | -4.04487 |
| SCARA3    | -0.94122 | 4.720606 | -2.13393 | 0.034082 | 0.079287 | -4.83736 |
| MKRN3     | 2.246283 | 0.220179 | 2.13363  | 0.034107 | 0.079319 | -3.91169 |
| TOM1L1    | -0.47227 | 5.382398 | -2.13366 | 0.034105 | 0.079319 | -4.85368 |
| LRPPRC    | 0.333661 | 7.841539 | 2.133439 | 0.034123 | 0.079342 | -4.86583 |
| MYO19     | 0.411233 | 6.209019 | 2.13317  | 0.034145 | 0.079381 | -4.85708 |
| ASH1L     | -0.34781 | 7.056844 | -2.1325  | 0.034201 | 0.079497 | -4.87158 |
| RNF122    | -0.56428 | 2.651053 | -2.132   | 0.034243 | 0.079581 | -4.46933 |
| SLC11A1   | 0.99461  | 2.776761 | 2.131632 | 0.034273 | 0.079626 | -4.23663 |
| FURIN     | 0.47716  | 7.58035  | 2.131682 | 0.034269 | 0.079626 | -4.8771  |
| ING4      | -0.40176 | 3.434999 | -2.13033 | 0.034382 | 0.079865 | -4.6082  |
| PABPN1    | 0.317439 | 6.881682 | 2.12917  | 0.034479 | 0.080077 | -4.88693 |
| MAP3K11   | 0.304876 | 6.985466 | 2.128946 | 0.034498 | 0.080107 | -4.88769 |
| COL6A3    | 0.945776 | 8.911311 | 2.128049 | 0.034573 | 0.080269 | -4.86341 |
| GLUD2     | -0.41617 | 4.802928 | -2.12788 | 0.034587 | 0.080287 | -4.81709 |
| CSNK2A1   | 0.297436 | 6.371036 | 2.127603 | 0.034611 | 0.080317 | -4.88026 |
| RFC1      | -0.33222 | 5.824519 | -2.1276  | 0.034611 | 0.080317 | -4.88081 |
| POTEF     | 1.114898 | 0.966856 | 2.127358 | 0.034631 | 0.08035  | -3.98323 |
| C1QB      | 1.093581 | 5.953483 | 2.126935 | 0.034667 | 0.080419 | -4.79714 |
| NR4A1     | -1.04684 | 6.401159 | -2.12677 | 0.034681 | 0.080439 | -4.88354 |
| NHSL1     | 0.584362 | 6.065923 | 2.126563 | 0.034698 | 0.080465 | -4.85171 |
| C8orf51   | 0.890378 | 0.113183 | 2.126274 | 0.034723 | 0.080508 | -3.92535 |
| HSPA1L    | -0.46008 | 0.555061 | -2.12606 | 0.034741 | 0.080537 | -4.10973 |
| DVL1      | -0.44868 | 6.366091 | -2.12536 | 0.0348   | 0.080661 | -4.89495 |
| ZNF776    | -0.3872  | 4.183956 | -2.12522 | 0.034812 | 0.080675 | -4.7484  |
| C14orf169 | 0.372943 | 3.762994 | 2.12487  | 0.034841 | 0.08073  | -4.54248 |
| LAMA3     | 1.055667 | 7.41378  | 2.124751 | 0.034851 | 0.08074  | -4.89362 |

|           |          |          |          |          |          |          |
|-----------|----------|----------|----------|----------|----------|----------|
| PUS3      | -0.35438 | 3.086438 | -2.12467 | 0.034858 | 0.080741 | -4.5352  |
| CETN2     | 0.409702 | 5.276098 | 2.124569 | 0.034867 | 0.080748 | -4.79715 |
| ANKRD11   | -0.29359 | 8.098781 | -2.1235  | 0.034957 | 0.080944 | -4.86397 |
| NHLRC3    | -0.45573 | 4.457449 | -2.12142 | 0.035134 | 0.081341 | -4.797   |
| LOC401010 | 0.539112 | 0.593697 | 2.121333 | 0.035141 | 0.081344 | -4.00999 |
| ESCO1     | 0.457027 | 4.958581 | 2.120675 | 0.035197 | 0.081449 | -4.76078 |
| MLPH      | -1.56173 | 4.01981  | -2.12052 | 0.03521  | 0.081449 | -4.84592 |
| CSNK2A2   | -0.31952 | 5.092984 | -2.12046 | 0.035216 | 0.081449 | -4.85152 |
| ATN1      | -0.38107 | 8.009446 | -2.12065 | 0.0352   | 0.081449 | -4.87027 |
| LNx2      | -0.41366 | 5.468282 | -2.1205  | 0.035212 | 0.081449 | -4.88309 |
| ACOT8     | -0.32221 | 4.037851 | -2.11988 | 0.035265 | 0.08155  | -4.72938 |
| FAM157A   | 1.418844 | 1.230328 | 2.119639 | 0.035286 | 0.081557 | -3.99465 |
| ASPHD2    | -0.69478 | 2.743007 | -2.1197  | 0.03528  | 0.081557 | -4.53141 |
| KRT18     | 1.017475 | 8.119309 | 2.11975  | 0.035276 | 0.081557 | -4.90042 |
| PLEKHF2   | -0.33163 | 5.228028 | -2.11948 | 0.035299 | 0.081575 | -4.86518 |
| CEP120    | -0.33513 | 4.467789 | -2.11883 | 0.035355 | 0.081689 | -4.79175 |
| METAP2    | 0.317055 | 6.713667 | 2.118644 | 0.035371 | 0.081713 | -4.9069  |
| COPS5     | 0.309904 | 5.549146 | 2.118458 | 0.035387 | 0.081737 | -4.84629 |
| LAMC3     | 1.506192 | 2.8341   | 2.117742 | 0.035448 | 0.081851 | -4.20026 |
| IL15RA    | 0.6581   | 4.084496 | 2.117786 | 0.035444 | 0.081851 | -4.56875 |
| PRDM11    | -0.5161  | 0.898274 | -2.11744 | 0.035474 | 0.081898 | -4.18477 |
| HOMEZ     | -0.44352 | 4.243495 | -2.11682 | 0.035527 | 0.081993 | -4.7798  |
| ATP5D     | -0.45446 | 6.291545 | -2.11686 | 0.035524 | 0.081993 | -4.91273 |
| NMT1      | 0.249099 | 7.111107 | 2.116323 | 0.03557  | 0.082079 | -4.91286 |
| LMBR1     | -0.36872 | 5.745488 | -2.1152  | 0.035667 | 0.082288 | -4.9048  |
| C20orf11  | 0.304918 | 6.524782 | 2.114562 | 0.035722 | 0.082402 | -4.9117  |
| CLNS1A    | 0.403599 | 6.184651 | 2.114487 | 0.035728 | 0.082403 | -4.89502 |
| TMEM182   | 0.497039 | 2.51473  | 2.114294 | 0.035745 | 0.082406 | -4.2996  |
| MMP23B    | -0.7386  | 1.584202 | -2.11427 | 0.035747 | 0.082406 | -4.32809 |
| ANKRD6    | -0.87203 | 2.329351 | -2.1143  | 0.035745 | 0.082406 | -4.49586 |
| IGSF8     | 0.436025 | 5.557233 | 2.114031 | 0.035768 | 0.08244  | -4.84516 |
| SGK196    | 0.790319 | 3.1966   | 2.113699 | 0.035797 | 0.082492 | -4.37274 |
| IFIT1     | 1.587194 | 4.1739   | 2.113601 | 0.035805 | 0.082498 | -4.42163 |
| CHSY3     | 0.914945 | 1.192358 | 2.113221 | 0.035838 | 0.082547 | -4.05821 |
| SLC2A9    | 1.14309  | 2.36874  | 2.113222 | 0.035838 | 0.082547 | -4.19198 |
| LILRB2    | 1.066761 | 1.687475 | 2.112748 | 0.035879 | 0.082627 | -4.10564 |
| SLC10A7   | -0.37629 | 3.931878 | -2.11264 | 0.035889 | 0.082636 | -4.73447 |
| IRS2      | -0.98552 | 6.052511 | -2.11161 | 0.035978 | 0.082828 | -4.92107 |
| GPR135    | -0.64022 | 0.101544 | -2.11145 | 0.035992 | 0.082847 | -4.10013 |
| CASP9     | -0.39139 | 3.628349 | -2.11091 | 0.036038 | 0.08294  | -4.68502 |
| KBTBD11   | -1.07771 | 2.472884 | -2.11025 | 0.036097 | 0.08306  | -4.56516 |
| C6orf1    | 0.567596 | 3.568411 | 2.109256 | 0.036183 | 0.083237 | -4.49707 |
| STRA13    | 0.490604 | 4.749249 | 2.109211 | 0.036187 | 0.083237 | -4.74912 |
| RHEB      | 0.411071 | 5.418791 | 2.10916  | 0.036191 | 0.083237 | -4.84404 |
| SVIL      | -0.67489 | 7.24014  | -2.10897 | 0.036208 | 0.083262 | -4.90955 |
| RPL35     | 0.510716 | 8.065654 | 2.108549 | 0.036245 | 0.083332 | -4.9158  |
| RPIA      | 0.503193 | 4.141802 | 2.108236 | 0.036272 | 0.083381 | -4.63061 |
| MRPL39    | -0.33834 | 3.607686 | -2.10754 | 0.036333 | 0.083508 | -4.67918 |
| ZNF616    | -0.32087 | 2.749328 | -2.10589 | 0.036478 | 0.083826 | -4.49538 |
| TOX2      | -0.83972 | 3.190082 | -2.10516 | 0.036542 | 0.083961 | -4.69252 |
| ATRN      | -0.50696 | 6.889976 | -2.10404 | 0.036641 | 0.084173 | -4.93087 |
| ITGBL1    | -1.20513 | 2.001179 | -2.10345 | 0.036693 | 0.084279 | -4.50982 |
| RRP7A     | 0.412097 | 5.041958 | 2.102802 | 0.03675  | 0.08438  | -4.81321 |
| NEURL4    | -0.27693 | 4.587834 | -2.10275 | 0.036755 | 0.08438  | -4.83308 |
| KIAA0090  | 0.359154 | 6.267343 | 2.102852 | 0.036746 | 0.08438  | -4.925   |
| FAAH      | -0.73772 | 3.412008 | -2.10195 | 0.036826 | 0.084529 | -4.71633 |
| LOC728392 | -0.71963 | 1.685159 | -2.10165 | 0.036853 | 0.084577 | -4.36893 |
| DVL3      | 0.440089 | 7.80565  | 2.101363 | 0.036878 | 0.084621 | -4.93487 |

|           |          |          |          |          |          |          |
|-----------|----------|----------|----------|----------|----------|----------|
| FNIP1     | -0.40509 | 5.190763 | -2.10113 | 0.036898 | 0.084654 | -4.9049  |
| NUP133    | 0.291033 | 5.825323 | 2.100964 | 0.036913 | 0.084675 | -4.90663 |
| ADAMTS7   | 0.819462 | 3.616203 | 2.100638 | 0.036942 | 0.084713 | -4.474   |
| AGFG2     | -0.59859 | 4.568609 | -2.10069 | 0.036938 | 0.084713 | -4.86609 |
| HGS       | 0.295924 | 7.205686 | 2.100432 | 0.036961 | 0.084741 | -4.94493 |
| C6orf141  | 1.466691 | 1.777999 | 2.098995 | 0.037089 | 0.085011 | -4.09526 |
| TMEM154   | 1.561631 | 4.646278 | 2.098973 | 0.037091 | 0.085011 | -4.55432 |
| LPHN3     | -0.95112 | 2.298598 | -2.09849 | 0.037134 | 0.085096 | -4.53122 |
| CYP4V2    | -0.65567 | 4.519493 | -2.09842 | 0.03714  | 0.085096 | -4.87052 |
| ANPEP     | 2.498782 | 4.845044 | 2.09812  | 0.037167 | 0.085142 | -4.41644 |
| GTF2IRD1  | 0.456362 | 5.85787  | 2.098063 | 0.037172 | 0.085142 | -4.90355 |
| POU2AF1   | -1.17297 | 3.117694 | -2.09768 | 0.037206 | 0.085207 | -4.73926 |
| UBE2B     | -0.31193 | 5.280613 | -2.09751 | 0.037221 | 0.085227 | -4.91312 |
| ER11      | 0.524356 | 4.562383 | 2.096781 | 0.037287 | 0.085363 | -4.73632 |
| CD101     | 0.709878 | 1.577884 | 2.096346 | 0.037326 | 0.085438 | -4.1672  |
| LANCL1    | -0.3902  | 6.280189 | -2.09586 | 0.037369 | 0.085524 | -4.95585 |
| CCDC52    | 0.411898 | 4.547224 | 2.095545 | 0.037397 | 0.085574 | -4.75453 |
| H3F3C     | 0.548193 | 0.799906 | 2.095346 | 0.037415 | 0.08559  | -4.08626 |
| DEDD2     | 0.418222 | 5.044866 | 2.095333 | 0.037416 | 0.08559  | -4.8284  |
| PPP2R5D   | 0.400133 | 5.843995 | 2.094744 | 0.037469 | 0.085697 | -4.91313 |
| CACNB1    | 0.705271 | 2.8801   | 2.093931 | 0.037543 | 0.085851 | -4.37302 |
| MBIP      | -0.42117 | 4.168919 | -2.09353 | 0.037579 | 0.085919 | -4.81543 |
| NHP2      | 0.427978 | 5.290781 | 2.093251 | 0.037604 | 0.085963 | -4.86118 |
| RCAN1     | -0.53609 | 5.305015 | -2.09262 | 0.037661 | 0.086079 | -4.93735 |
| TXNDC16   | -0.50022 | 3.848646 | -2.0924  | 0.037681 | 0.086111 | -4.78113 |
| PHF20L1   | 0.32325  | 6.220662 | 2.092293 | 0.037691 | 0.086118 | -4.94601 |
| ZNF566    | -0.54051 | 2.933075 | -2.09209 | 0.037709 | 0.086146 | -4.60706 |
| COX18     | -0.33435 | 3.565603 | -2.09186 | 0.037729 | 0.086179 | -4.70049 |
| PSMC3     | 0.311024 | 6.336803 | 2.091415 | 0.03777  | 0.086258 | -4.95316 |
| FER       | -0.57675 | 2.22254  | -2.09107 | 0.037802 | 0.086315 | -4.46622 |
| ADAMTSL2  | 0.817175 | 2.770471 | 2.090754 | 0.03783  | 0.086366 | -4.34379 |
| RTP4      | 1.231659 | 2.812037 | 2.09068  | 0.037837 | 0.086367 | -4.29018 |
| LOC645676 | 0.436297 | 1.263161 | 2.090362 | 0.037866 | 0.086419 | -4.16826 |
| C17orf101 | -0.31999 | 3.518058 | -2.09016 | 0.037884 | 0.086447 | -4.69143 |
| CXorf38   | 0.536019 | 3.449817 | 2.08993  | 0.037905 | 0.086481 | -4.51378 |
| ZNRD1     | 0.425885 | 3.911596 | 2.089861 | 0.037911 | 0.086481 | -4.63406 |
| BCL7A     | 0.585139 | 4.618583 | 2.089561 | 0.037938 | 0.086515 | -4.75237 |
| NID1      | -0.79158 | 7.053193 | -2.0896  | 0.037935 | 0.086515 | -4.95126 |
| GGT7      | -0.74746 | 3.582161 | -2.08935 | 0.037958 | 0.086545 | -4.77812 |
| IL27RA    | 1.00877  | 3.836079 | 2.089265 | 0.037965 | 0.086548 | -4.50733 |
| KITLG     | -0.68845 | 5.809997 | -2.08887 | 0.038001 | 0.086615 | -4.96758 |
| SYVN1     | -0.27992 | 6.848066 | -2.08858 | 0.038027 | 0.086661 | -4.967   |
| C1orf213  | -0.49864 | 0.323107 | -2.08742 | 0.038134 | 0.08689  | -4.16018 |
| BEX2      | -1.47865 | 0.458424 | -2.08696 | 0.038176 | 0.086914 | -4.30942 |
| LOC285074 | 0.37874  | 3.807767 | 2.087096 | 0.038163 | 0.086914 | -4.62961 |
| WDR52     | -0.66901 | 3.062914 | -2.08701 | 0.038171 | 0.086914 | -4.66376 |
| CDC23     | 0.283108 | 5.233209 | 2.087019 | 0.03817  | 0.086914 | -4.88175 |
| ZNF238    | -0.67168 | 4.583759 | -2.08719 | 0.038155 | 0.086914 | -4.90082 |
| WNT10A    | 1.995347 | 2.601509 | 2.086694 | 0.0382   | 0.086955 | -4.16593 |
| ZFAND3    | -0.28574 | 6.138596 | -2.08604 | 0.03826  | 0.087078 | -4.97336 |
| ZNF860    | 0.889097 | 1.528927 | 2.085114 | 0.038345 | 0.087256 | -4.15913 |
| TMEM133   | -0.73501 | 2.326659 | -2.08424 | 0.038425 | 0.087425 | -4.52232 |
| RNFT2     | 1.241618 | 2.167111 | 2.083707 | 0.038474 | 0.087522 | -4.20672 |
| C9orf68   | -0.81463 | 1.155385 | -2.08359 | 0.038485 | 0.087532 | -4.32827 |
| C20orf29  | 0.371458 | 3.465346 | 2.083093 | 0.038531 | 0.087622 | -4.56267 |
| ST13      | -0.29316 | 7.04884  | -2.08295 | 0.038544 | 0.087638 | -4.97467 |
| CLMN      | -0.98712 | 5.027222 | -2.08257 | 0.038579 | 0.087702 | -4.96249 |
| WHAMML1   | -0.76234 | 0.745168 | -2.08227 | 0.038607 | 0.087752 | -4.26477 |

|           |          |          |          |          |          |          |
|-----------|----------|----------|----------|----------|----------|----------|
| LAMA1     | 2.54524  | 1.259911 | 2.082043 | 0.038628 | 0.087785 | -4.01717 |
| NCOR1     | -0.39652 | 7.565959 | -2.08177 | 0.038652 | 0.087827 | -4.96308 |
| TBC1D9B   | -0.3174  | 7.406609 | -2.08031 | 0.038788 | 0.088121 | -4.97196 |
| NCKAP5    | -0.89043 | 2.298359 | -2.07973 | 0.038841 | 0.088228 | -4.56012 |
| TIMM16    | 0.493376 | 3.351352 | 2.079138 | 0.038897 | 0.08834  | -4.52391 |
| C13orf29  | 1.054232 | 2.043176 | 2.078585 | 0.038948 | 0.088427 | -4.22439 |
| ISPD      | -0.65088 | 1.718975 | -2.0786  | 0.038947 | 0.088427 | -4.40912 |
| KIAA1324  | -1.74278 | 4.646175 | -2.07852 | 0.038954 | 0.088427 | -4.97809 |
| TFAP2E    | 1.072302 | 0.160998 | 2.078148 | 0.038989 | 0.088477 | -4.01953 |
| VPS37A    | -0.32274 | 5.20284  | -2.0782  | 0.038984 | 0.088477 | -4.94737 |
| LGALS1    | 0.865546 | 6.681122 | 2.077981 | 0.039004 | 0.088498 | -4.97297 |
| GOLGB1    | -0.40849 | 7.776108 | -2.07749 | 0.03905  | 0.088587 | -4.96534 |
| EGR1      | -0.87193 | 7.662922 | -2.07678 | 0.039116 | 0.088723 | -4.95709 |
| NOTUM     | 2.23138  | 0.801222 | 2.076577 | 0.039135 | 0.088737 | -4.02581 |
| FMO4      | -0.61227 | 1.909523 | -2.07661 | 0.039133 | 0.088737 | -4.43825 |
| NR2F6     | -0.43344 | 6.214949 | -2.07583 | 0.039205 | 0.088881 | -4.9965  |
| PAAF1     | -0.46643 | 3.663865 | -2.07571 | 0.039216 | 0.088892 | -4.77734 |
| WWC1      | -0.67507 | 5.53279  | -2.07564 | 0.039223 | 0.088892 | -4.98718 |
| CACNB3    | 0.524575 | 4.283632 | 2.074555 | 0.039325 | 0.089109 | -4.7287  |
| ARPM1     | 0.715137 | 1.194619 | 2.074312 | 0.039347 | 0.089146 | -4.15853 |
| MLH1      | -0.38076 | 4.653407 | -2.0742  | 0.039358 | 0.089155 | -4.90886 |
| MOCS3     | 0.418525 | 3.648818 | 2.073701 | 0.039405 | 0.089232 | -4.61322 |
| FUCA1     | -0.64468 | 5.199298 | -2.07373 | 0.039402 | 0.089232 | -4.97482 |
| DLK2      | 1.890042 | 0.795657 | 2.072644 | 0.039504 | 0.089419 | -4.03328 |
| CEP97     | 0.629612 | 3.620541 | 2.07264  | 0.039505 | 0.089419 | -4.56993 |
| DIS3L     | -0.35288 | 4.80021  | -2.07262 | 0.039507 | 0.089419 | -4.92492 |
| ACOT1     | -0.58774 | 1.792558 | -2.07251 | 0.039516 | 0.089427 | -4.4254  |
| IL12RB1   | 1.215868 | 0.842664 | 2.072233 | 0.039543 | 0.089458 | -4.06542 |
| CA13      | -0.91097 | 2.881142 | -2.07227 | 0.039539 | 0.089458 | -4.70107 |
| ZNF417    | -0.47851 | 3.369835 | -2.07176 | 0.039588 | 0.089531 | -4.72728 |
| F2RL1     | 0.916261 | 5.896136 | 2.0718   | 0.039584 | 0.089531 | -4.91995 |
| C16orf63  | 0.443305 | 5.339556 | 2.071465 | 0.039615 | 0.089578 | -4.90917 |
| ZMYND15   | 0.987292 | 1.378319 | 2.071133 | 0.039647 | 0.089628 | -4.15535 |
| ABCG1     | -0.57611 | 4.380955 | -2.0711  | 0.03965  | 0.089628 | -4.90307 |
| AP3M1     | -0.28512 | 6.290369 | -2.07076 | 0.039682 | 0.089686 | -5.00649 |
| MST1P9    | -1.20384 | 0.798952 | -2.0702  | 0.039735 | 0.089791 | -4.35065 |
| ZNF655    | -0.84728 | 5.59666  | -2.06984 | 0.039769 | 0.089853 | -5.00449 |
| TNFSF13   | -0.72962 | 4.079188 | -2.06967 | 0.039785 | 0.089874 | -4.88442 |
| ZMAT5     | -0.43182 | 3.372975 | -2.06923 | 0.039827 | 0.089955 | -4.72542 |
| FOLR2     | -0.93458 | 1.348094 | -2.06883 | 0.039864 | 0.089988 | -4.40902 |
| FLJ10357  | -0.59075 | 4.76708  | -2.06897 | 0.039852 | 0.089988 | -4.94872 |
| C10orf54  | -0.59713 | 5.615863 | -2.0688  | 0.039867 | 0.089988 | -5.00183 |
| CTTN      | 0.65804  | 7.885024 | 2.068904 | 0.039858 | 0.089988 | -5.00314 |
| PRDX6     | -0.37297 | 7.342307 | -2.06819 | 0.039925 | 0.090104 | -4.99687 |
| SLC35A4   | -0.31063 | 7.044465 | -2.06742 | 0.039998 | 0.090255 | -5.00593 |
| PUM1      | 0.204865 | 7.37114  | 2.067266 | 0.040013 | 0.090274 | -5.00869 |
| PARN      | 0.299168 | 5.548635 | 2.06697  | 0.040042 | 0.090323 | -4.95235 |
| MTX1      | 0.551786 | 4.2762   | 2.06637  | 0.040099 | 0.090437 | -4.73622 |
| MIER2     | 0.303479 | 4.952637 | 2.066262 | 0.040109 | 0.090446 | -4.88908 |
| TXNRD3IT1 | -0.65665 | 2.573881 | -2.06617 | 0.040118 | 0.090451 | -4.60383 |
| MRPS28    | 0.414834 | 3.74376  | 2.065739 | 0.040159 | 0.090529 | -4.64976 |
| TLR4      | -0.75743 | 3.005654 | -2.06538 | 0.040193 | 0.090592 | -4.71611 |
| ATM       | -0.46846 | 5.728673 | -2.06487 | 0.040242 | 0.090688 | -5.00997 |
| DVL2      | 0.481658 | 5.219942 | 2.064018 | 0.040324 | 0.090848 | -4.90706 |
| ABCF2     | 0.379837 | 6.048516 | 2.063988 | 0.040327 | 0.090848 | -4.99151 |
| ZMYND17   | -0.40669 | 1.898945 | -2.06356 | 0.040368 | 0.090885 | -4.43301 |
| C7orf44   | 0.280754 | 4.872512 | 2.063712 | 0.040353 | 0.090885 | -4.88659 |
| FBP1      | -1.14604 | 3.878099 | -2.06365 | 0.040359 | 0.090885 | -4.91279 |

|              |          |          |          |          |          |          |
|--------------|----------|----------|----------|----------|----------|----------|
| AKT3         | -0.79325 | 4.468367 | -2.06355 | 0.040369 | 0.090885 | -4.94922 |
| HLX          | 0.649487 | 2.036295 | 2.06324  | 0.040398 | 0.090937 | -4.30758 |
| C19orf55     | 0.445058 | 3.554806 | 2.062331 | 0.040486 | 0.091119 | -4.61081 |
| SH2B3        | 0.594757 | 5.377776 | 2.061719 | 0.040544 | 0.091236 | -4.91712 |
| TRPA1        | -1.33332 | 1.829589 | -2.06113 | 0.040601 | 0.091335 | -4.57251 |
| UTP20        | 0.408126 | 5.538668 | 2.061134 | 0.040601 | 0.091335 | -4.9539  |
| CYB5RL       | -0.48864 | 2.072654 | -2.06097 | 0.040616 | 0.091354 | -4.48012 |
| STARD5       | 0.89581  | 3.269284 | 2.060681 | 0.040645 | 0.091403 | -4.47611 |
| CMTM3        | 0.835535 | 4.20761  | 2.06047  | 0.040665 | 0.091434 | -4.67821 |
| PRDM1        | 0.775049 | 5.68986  | 2.060227 | 0.040688 | 0.091472 | -4.93719 |
| ZNF607       | -0.76679 | 2.530581 | -2.05997 | 0.040714 | 0.091514 | -4.62778 |
| GPR109A      | 2.35948  | 1.448746 | 2.059731 | 0.040736 | 0.09155  | -4.06079 |
| MTERFD2      | -0.30375 | 3.403917 | -2.05938 | 0.04077  | 0.091609 | -4.7273  |
| ITGB2        | 1.028466 | 4.771795 | 2.059325 | 0.040775 | 0.091609 | -4.76274 |
| C15orf57     | -0.36273 | 3.498161 | -2.05857 | 0.040849 | 0.091712 | -4.75846 |
| FRAT2        | 0.584295 | 4.355    | 2.058708 | 0.040835 | 0.091712 | -4.76024 |
| TTC4         | 0.329889 | 4.582407 | 2.058565 | 0.040849 | 0.091712 | -4.8492  |
| PRR15L       | -1.65934 | 3.145169 | -2.05852 | 0.040854 | 0.091712 | -4.87845 |
| TOB1         | -0.59112 | 6.184444 | -2.05851 | 0.040854 | 0.091712 | -5.03155 |
| PKN1         | -0.60674 | 6.06164  | -2.0581  | 0.040895 | 0.091788 | -5.03209 |
| LOC100289341 | 0.797509 | 1.073541 | 2.058017 | 0.040902 | 0.09179  | -4.16529 |
| URB2         | 0.405414 | 4.863944 | 2.057544 | 0.040948 | 0.091878 | -4.88321 |
| CRISPLD1     | 1.280979 | 2.660185 | 2.05712  | 0.040989 | 0.091927 | -4.3295  |
| NUDCD2       | 0.377124 | 3.890725 | 2.057129 | 0.040988 | 0.091927 | -4.70698 |
| LUM          | 0.874556 | 7.920338 | 2.057149 | 0.040987 | 0.091927 | -5.02959 |
| C2CD4D       | 0.877358 | 0.602607 | 2.056907 | 0.04101  | 0.091958 | -4.10045 |
| FIS1         | -0.35113 | 5.320276 | -2.05672 | 0.041028 | 0.091984 | -5.00102 |
| C8orf59      | 0.39965  | 4.606066 | 2.056466 | 0.041053 | 0.092025 | -4.84667 |
| HORMAD1      | 2.255879 | -0.17235 | 2.056326 | 0.041067 | 0.092041 | -4.06007 |
| TOR1B        | 0.376291 | 5.034663 | 2.05602  | 0.041096 | 0.092093 | -4.91121 |
| ZBTB49       | -0.30419 | 2.08113  | -2.05586 | 0.041112 | 0.092113 | -4.46469 |
| CDH5         | -0.67974 | 4.828448 | -2.05566 | 0.041132 | 0.092143 | -4.98757 |
| PALM2        | 1.208181 | 0.925661 | 2.055424 | 0.041154 | 0.092178 | -4.10956 |
| MBP          | -0.38167 | 5.616791 | -2.05511 | 0.041186 | 0.092233 | -5.02236 |
| NAT9         | 0.413255 | 4.027414 | 2.054673 | 0.041228 | 0.092262 | -4.7324  |
| SNHG6        | 0.529056 | 5.439662 | 2.054638 | 0.041231 | 0.092262 | -4.9457  |
| GPC4         | -0.83748 | 4.699373 | -2.05468 | 0.041227 | 0.092262 | -4.99039 |
| DENND4A      | -0.38359 | 5.315255 | -2.05476 | 0.041219 | 0.092262 | -5.00652 |
| PCDH1        | -1.02906 | 6.605745 | -2.05464 | 0.041231 | 0.092262 | -5.02721 |
| TMEM111      | -0.35407 | 4.974539 | -2.05456 | 0.041239 | 0.092264 | -4.97782 |
| PIM2         | 0.884581 | 4.329236 | 2.054108 | 0.041283 | 0.092348 | -4.70627 |
| PITPNA       | -0.30941 | 6.603992 | -2.05343 | 0.04135  | 0.092482 | -5.0411  |
| TMEM126A     | -0.3886  | 3.47564  | -2.05317 | 0.041375 | 0.092524 | -4.76925 |
| DQX1         | 1.408825 | 2.12356  | 2.053084 | 0.041383 | 0.092528 | -4.23697 |
| KRBA1        | -0.85657 | 2.820409 | -2.05262 | 0.041429 | 0.0926   | -4.72185 |
| LBH          | 0.685214 | 5.496608 | 2.052654 | 0.041425 | 0.0926   | -4.94048 |
| C11orf41     | 2.214893 | 3.098884 | 2.052402 | 0.04145  | 0.092622 | -4.2756  |
| ARNT2        | -0.96596 | 3.328002 | -2.05238 | 0.041452 | 0.092622 | -4.84274 |
| VCL          | -0.44661 | 8.108441 | -2.05197 | 0.041493 | 0.092698 | -5.00492 |
| LST1         | 0.966109 | 1.55136  | 2.051676 | 0.041521 | 0.092719 | -4.22069 |
| C10orf76     | -0.29978 | 5.21858  | -2.05177 | 0.041512 | 0.092719 | -5.00025 |
| RANBP9       | -0.40292 | 6.035582 | -2.05167 | 0.041522 | 0.092719 | -5.0428  |
| VANGL1       | 0.532258 | 5.92808  | 2.050788 | 0.041609 | 0.092883 | -4.9993  |
| SLC7A8       | -1.16802 | 6.463338 | -2.05084 | 0.041603 | 0.092883 | -5.03498 |
| GCAT         | -0.54256 | 2.97893  | -2.05071 | 0.041616 | 0.092885 | -4.69824 |
| OCIAD2       | 0.56475  | 5.325288 | 2.050232 | 0.041663 | 0.092976 | -4.93674 |
| TMEM98       | -0.75225 | 4.586545 | -2.04967 | 0.041719 | 0.093084 | -4.98319 |
| RP9          | 0.483536 | 3.439343 | 2.049443 | 0.041741 | 0.09312  | -4.60372 |



|           |          |          |          |          |          |          |
|-----------|----------|----------|----------|----------|----------|----------|
| TATDN1    | 0.486321 | 3.468753 | 2.048415 | 0.041843 | 0.093331 | -4.61074 |
| RABGAP1L  | -0.32489 | 4.43564  | -2.0481  | 0.041874 | 0.093386 | -4.93072 |
| MEGF9     | -0.60989 | 5.443869 | -2.04771 | 0.041912 | 0.093456 | -5.03818 |
| WDR70     | 0.358225 | 4.178628 | 2.047643 | 0.041919 | 0.093457 | -4.79069 |
| CCDC51    | 0.456856 | 3.612818 | 2.047258 | 0.041957 | 0.093527 | -4.65089 |
| GBA       | 0.435518 | 5.282636 | 2.045955 | 0.042087 | 0.093801 | -4.95471 |
| PTENP1    | -0.32938 | 3.220738 | -2.04581 | 0.042101 | 0.093813 | -4.71935 |
| PTN       | -0.97251 | 2.757566 | -2.04576 | 0.042106 | 0.093813 | -4.74754 |
| HSPA1B    | 0.737477 | 6.290696 | 2.045151 | 0.042167 | 0.093932 | -5.0238  |
| PITPNM1   | 0.474471 | 6.262923 | 2.045092 | 0.042173 | 0.093932 | -5.03669 |
| ARHGAP19  | 0.429962 | 4.161353 | 2.044742 | 0.042207 | 0.093995 | -4.77723 |
| ANTXR2    | -0.74274 | 5.54288  | -2.04459 | 0.042223 | 0.094014 | -5.05187 |
| KIAA1731  | 0.386257 | 4.762229 | 2.044284 | 0.042253 | 0.094066 | -4.89721 |
| RPL8      | 0.465004 | 9.891547 | 2.043992 | 0.042282 | 0.094116 | -4.98746 |
| KLHL18    | -0.34858 | 4.664975 | -2.04372 | 0.04231  | 0.094162 | -4.9681  |
| ZNF286A   | 0.521657 | 3.78186  | 2.043162 | 0.042365 | 0.094271 | -4.68492 |
| RHBDD1    | -0.38339 | 4.247383 | -2.043   | 0.042381 | 0.094281 | -4.92353 |
| C17orf85  | -0.25511 | 5.096632 | -2.0429  | 0.042391 | 0.094281 | -5.00431 |
| NARG2     | -0.25358 | 5.525666 | -2.04284 | 0.042397 | 0.094281 | -5.03649 |
| PCSK7     | -0.46705 | 5.622006 | -2.04287 | 0.042394 | 0.094281 | -5.05009 |
| ZNF17     | -0.30898 | 2.780336 | -2.04138 | 0.042544 | 0.094593 | -4.63059 |
| LOC283314 | 0.630216 | 2.809852 | 2.041081 | 0.042574 | 0.094644 | -4.47609 |
| FMR1      | 0.342174 | 5.974816 | 2.040632 | 0.042619 | 0.094729 | -5.03578 |
| MME       | 1.535501 | 3.067273 | 2.040445 | 0.042637 | 0.094756 | -4.38799 |
| NAA16     | -0.35154 | 4.384366 | -2.04038 | 0.042644 | 0.094756 | -4.94219 |
| FAM171A2  | 1.239492 | 1.213043 | 2.039699 | 0.042712 | 0.094892 | -4.17055 |
| SOD2      | 0.576626 | 8.264878 | 2.039086 | 0.042774 | 0.095014 | -5.05325 |
| RGS16     | 0.977749 | 3.446515 | 2.038719 | 0.042811 | 0.095082 | -4.54139 |
| SLC27A2   | 2.022424 | 2.410661 | 2.038605 | 0.042823 | 0.095092 | -4.23036 |
| KCNC3     | 1.065677 | 2.179844 | 2.03841  | 0.042842 | 0.095106 | -4.32219 |
| COX16     | -0.32195 | 4.97806  | -2.03844 | 0.04284  | 0.095106 | -5.00743 |
| KLK9      | 2.529519 | -0.14425 | 2.038133 | 0.04287  | 0.095152 | -4.0949  |
| LIG4      | -0.41189 | 4.332676 | -2.03712 | 0.042973 | 0.095365 | -4.94855 |
| PNRC2     | -0.35223 | 6.484808 | -2.03699 | 0.042986 | 0.095378 | -5.07457 |
| SPCS1     | -0.35825 | 5.990189 | -2.03633 | 0.043053 | 0.095512 | -5.07176 |
| ZFYVE16   | -0.29721 | 5.554617 | -2.03566 | 0.043121 | 0.095647 | -5.05467 |
| D2HGDH    | -0.38962 | 4.315175 | -2.03558 | 0.043128 | 0.095649 | -4.94691 |
| SFXN4     | 0.448736 | 3.913424 | 2.03506  | 0.043182 | 0.095752 | -4.74007 |
| CXCL9     | 2.203308 | 4.48937  | 2.03487  | 0.043201 | 0.09578  | -4.53098 |
| PDGFRB    | 0.767286 | 6.908545 | 2.034557 | 0.043233 | 0.095835 | -5.07229 |
| PALMD     | -0.79793 | 3.714471 | -2.03432 | 0.043257 | 0.095873 | -4.91747 |
| SIAH1     | 0.379861 | 4.812496 | 2.033989 | 0.043291 | 0.095933 | -4.92606 |
| ADO       | 0.280037 | 5.169676 | 2.033756 | 0.043314 | 0.095955 | -4.98206 |
| PRPF38A   | 0.251331 | 5.164946 | 2.033799 | 0.04331  | 0.095955 | -4.98432 |
| PRRT3     | -0.43108 | 1.828762 | -2.0324  | 0.043452 | 0.096245 | -4.48779 |
| ZNF699    | -0.64256 | 1.072034 | -2.03194 | 0.043499 | 0.096334 | -4.3965  |
| NT5DC3    | -0.5894  | 4.349608 | -2.03185 | 0.043509 | 0.096341 | -4.98062 |
| TRIM9     | -1.05567 | 0.169308 | -2.03175 | 0.043519 | 0.096342 | -4.31628 |
| KIAA0831  | -0.33716 | 4.561374 | -2.03171 | 0.043523 | 0.096342 | -4.97953 |
| ZNF619    | -0.43456 | 1.790092 | -2.03155 | 0.04354  | 0.096363 | -4.48129 |
| ALDH3B2   | 4.026307 | 4.022138 | 2.031362 | 0.043559 | 0.096389 | -4.2188  |
| KIAA0922  | -0.57499 | 4.610369 | -2.03122 | 0.043573 | 0.096406 | -5.00852 |
| ATP6V0D1  | -0.33297 | 6.293658 | -2.0311  | 0.043585 | 0.096418 | -5.08635 |
| DCTN3     | -0.34916 | 4.75141  | -2.03081 | 0.043615 | 0.096453 | -5.00307 |
| AHDC1     | -0.5598  | 6.38917  | -2.03082 | 0.043614 | 0.096453 | -5.08591 |
| AQP9      | 1.408553 | 1.09005  | 2.030525 | 0.043644 | 0.096502 | -4.15413 |
| ALG8      | 0.450786 | 4.862058 | 2.030108 | 0.043687 | 0.096582 | -4.93115 |
| CCM2      | 0.392773 | 5.141306 | 2.030022 | 0.043696 | 0.096586 | -4.97441 |

|           |          |          |          |          |          |          |
|-----------|----------|----------|----------|----------|----------|----------|
| PRRT2     | -0.71611 | 1.162175 | -2.02991 | 0.043708 | 0.096597 | -4.42307 |
| HLA-DRA   | 0.881558 | 8.028739 | 2.029452 | 0.043755 | 0.096685 | -5.08309 |
| NRBP2     | -0.49715 | 4.995702 | -2.02936 | 0.043763 | 0.096689 | -5.04054 |
| WDR77     | 0.349493 | 5.454694 | 2.029088 | 0.043792 | 0.096737 | -5.01475 |
| C3orf67   | 1.4082   | 2.138787 | 2.02853  | 0.043849 | 0.096831 | -4.2906  |
| C17orf95  | 0.347421 | 4.125813 | 2.028477 | 0.043855 | 0.096831 | -4.81775 |
| ARL4C     | 0.926138 | 5.506863 | 2.028474 | 0.043855 | 0.096831 | -4.96403 |
| NDUFS2    | -0.30535 | 6.267524 | -2.02806 | 0.043898 | 0.09691  | -5.09199 |
| SUMO3     | 0.330089 | 6.377471 | 2.027919 | 0.043912 | 0.096926 | -5.08181 |
| P2RY8     | -0.80107 | 1.647938 | -2.02748 | 0.043958 | 0.097012 | -4.52206 |
| RPRD1A    | -0.41331 | 6.046309 | -2.02721 | 0.043985 | 0.097056 | -5.09193 |
| SLC35B3   | -0.36088 | 4.484929 | -2.02703 | 0.044004 | 0.097079 | -4.98139 |
| GNG12     | -0.37729 | 7.646271 | -2.02698 | 0.04401  | 0.097079 | -5.07137 |
| SPDYE3    | 0.569367 | 1.074901 | 2.026676 | 0.044041 | 0.097126 | -4.25168 |
| PARP2     | 0.381209 | 4.202516 | 2.026607 | 0.044048 | 0.097126 | -4.83262 |
| PANX1     | 0.466626 | 4.849764 | 2.026538 | 0.044055 | 0.097126 | -4.9353  |
| SURF6     | 0.352194 | 5.049134 | 2.026505 | 0.044058 | 0.097126 | -4.9748  |
| MRPL21    | 0.726201 | 4.787187 | 2.025959 | 0.044115 | 0.097235 | -4.88671 |
| TCEA1     | 0.33477  | 6.057907 | 2.024894 | 0.044225 | 0.097447 | -5.07254 |
| PLAGL2    | 0.48656  | 6.515256 | 2.024897 | 0.044225 | 0.097447 | -5.08754 |
| SHB       | 0.443125 | 5.906415 | 2.024632 | 0.044252 | 0.097492 | -5.05614 |
| IGBP1     | -0.32245 | 5.713171 | -2.02452 | 0.044264 | 0.0975   | -5.08537 |
| SMAD2     | -0.37144 | 6.314827 | -2.02446 | 0.04427  | 0.0975   | -5.0997  |
| UBE2Z     | 0.259443 | 6.897702 | 2.0241   | 0.044307 | 0.097567 | -5.10043 |
| LYPD5     | 1.325981 | 2.973081 | 2.023964 | 0.044321 | 0.097583 | -4.43747 |
| MORF4L2   | 0.274555 | 7.614151 | 2.023886 | 0.04433  | 0.097585 | -5.09201 |
| MMP7      | 3.9646   | 3.869894 | 2.023322 | 0.044388 | 0.097699 | -4.22174 |
| RASSF8    | -0.79803 | 3.835383 | -2.02259 | 0.044464 | 0.09785  | -4.95839 |
| UBD       | 2.77709  | 4.238493 | 2.022388 | 0.044485 | 0.097882 | -4.42642 |
| FAM83A    | 5.06628  | 4.524886 | 2.021432 | 0.044585 | 0.09807  | -4.18034 |
| RNF44     | 0.274852 | 6.464113 | 2.021489 | 0.044579 | 0.09807  | -5.09895 |
| WHSC2     | 0.340915 | 5.141883 | 2.020842 | 0.044647 | 0.098191 | -4.99807 |
| ZNF700    | -0.36888 | 3.857262 | -2.02075 | 0.044656 | 0.098196 | -4.90557 |
| NLE1      | 0.428574 | 4.11508  | 2.020639 | 0.044668 | 0.098206 | -4.81647 |
| FBXO36    | -0.51674 | 1.809573 | -2.02039 | 0.044694 | 0.098247 | -4.51899 |
| TNRC18    | 0.331648 | 8.53212  | 2.020005 | 0.044734 | 0.098321 | -5.07736 |
| CLDN12    | 0.618078 | 6.175682 | 2.019299 | 0.044808 | 0.098453 | -5.07431 |
| G3BP2     | -0.34555 | 7.211628 | -2.01936 | 0.044802 | 0.098453 | -5.09792 |
| C10orf84  | -0.22612 | 4.220606 | -2.01909 | 0.04483  | 0.098472 | -4.94822 |
| ADSS      | 0.305234 | 6.034047 | 2.019081 | 0.044831 | 0.098472 | -5.08427 |
| OXSM      | -0.3324  | 2.815109 | -2.01861 | 0.044881 | 0.09855  | -4.68495 |
| PIK3C3    | -0.33003 | 4.437835 | -2.01867 | 0.044874 | 0.09855  | -4.98998 |
| SKP1      | -0.27283 | 6.975819 | -2.01841 | 0.044901 | 0.098579 | -5.10578 |
| DAPK2     | -0.69899 | 2.686777 | -2.01755 | 0.044992 | 0.098762 | -4.72351 |
| LOC606724 | 0.691931 | 0.454831 | 2.016829 | 0.045068 | 0.098854 | -4.18074 |
| FRAT1     | -0.45681 | 1.976291 | -2.01702 | 0.045048 | 0.098854 | -4.54361 |
| BTN2A2    | 0.601174 | 3.066735 | 2.016822 | 0.045069 | 0.098854 | -4.57511 |
| LRRC37A4  | -0.69707 | 2.992542 | -2.01688 | 0.045063 | 0.098854 | -4.79989 |
| MTMR1     | 0.389655 | 5.737512 | 2.017018 | 0.045048 | 0.098854 | -5.06153 |
| ITPR2     | -0.63753 | 5.393272 | -2.01577 | 0.045179 | 0.099081 | -5.10036 |
| WDR20     | -0.23831 | 4.273641 | -2.0155  | 0.045209 | 0.09913  | -4.96411 |
| SYNJ1     | -0.35494 | 4.286238 | -2.01504 | 0.045257 | 0.099212 | -4.98077 |
| KCNQ1OT1  | -0.80461 | 4.856347 | -2.015   | 0.045261 | 0.099212 | -5.07839 |
| GZMA      | 1.43079  | 1.097631 | 2.014114 | 0.045355 | 0.099403 | -4.18284 |
| RBM28     | 0.3396   | 4.37989  | 2.013825 | 0.045385 | 0.099409 | -4.89977 |
| TIE1      | -0.60188 | 3.763008 | -2.01402 | 0.045365 | 0.099409 | -4.93826 |
| SGSH      | -0.38274 | 5.151225 | -2.01382 | 0.045386 | 0.099409 | -5.07603 |
| GRHPR     | -0.36084 | 5.345278 | -2.01382 | 0.045386 | 0.099409 | -5.08864 |

|              |          |          |          |          |          |          |
|--------------|----------|----------|----------|----------|----------|----------|
| PTGFRN       | 0.621809 | 7.495584 | 2.013306 | 0.04544  | 0.099513 | -5.11996 |
| ERP27        | -1.00249 | 0.278614 | -2.01245 | 0.045532 | 0.099697 | -4.3574  |
| ABCC10       | 0.429958 | 5.366671 | 2.012156 | 0.045563 | 0.099749 | -5.03128 |
| GJB5         | 3.400932 | 2.724248 | 2.011587 | 0.045623 | 0.099834 | -4.1697  |
| FMO2         | -1.35663 | 2.873914 | -2.01152 | 0.04563  | 0.099834 | -4.9044  |
| TAF11        | 0.290229 | 4.454171 | 2.011572 | 0.045625 | 0.099834 | -4.92647 |
| HDHD1A       | -0.62977 | 4.007267 | -2.01158 | 0.045624 | 0.099834 | -4.97978 |
| PRSS23       | -0.68585 | 5.902047 | -2.01141 | 0.045642 | 0.099846 | -5.1241  |
| HNF1B        | -2.12641 | 0.320354 | -2.01083 | 0.045704 | 0.099935 | -4.51156 |
| MINPP1       | 0.397825 | 4.475938 | 2.010824 | 0.045704 | 0.099935 | -4.9128  |
| WDR24        | -0.31266 | 4.30235  | -2.01087 | 0.045699 | 0.099935 | -4.98594 |
| ZNF34        | -0.34252 | 2.068539 | -2.00977 | 0.045817 | 0.10015  | -4.55891 |
| SREBF2       | -0.44114 | 8.24057  | -2.00977 | 0.045816 | 0.10015  | -5.08423 |
| WNT2B        | -0.926   | 1.873238 | -2.00969 | 0.045826 | 0.100153 | -4.6186  |
| ZNF318       | 0.465381 | 5.969618 | 2.009426 | 0.045854 | 0.100198 | -5.08942 |
| LINS1        | 0.345159 | 4.164018 | 2.009057 | 0.045893 | 0.100269 | -4.86505 |
| C1orf83      | -0.28066 | 3.356384 | -2.00884 | 0.045916 | 0.100288 | -4.81304 |
| PHTF2        | 0.488544 | 4.942497 | 2.008884 | 0.045912 | 0.100288 | -4.98115 |
| CSTF2T       | -0.32398 | 4.690466 | -2.00823 | 0.045982 | 0.100415 | -5.03896 |
| CAPN13       | -1.68968 | 0.44957  | -2.00803 | 0.046003 | 0.100446 | -4.47918 |
| SETDB1       | 0.304915 | 5.580348 | 2.007686 | 0.04604  | 0.100511 | -5.07264 |
| GATM         | -1.15348 | 4.987559 | -2.00721 | 0.046091 | 0.100591 | -5.11767 |
| ITPRIP       | -0.67641 | 6.02082  | -2.00725 | 0.046087 | 0.100591 | -5.13314 |
| IRF5         | 0.770547 | 3.649632 | 2.006892 | 0.046125 | 0.10065  | -4.67902 |
| FUNDC1       | -0.40293 | 3.35189  | -2.00661 | 0.046156 | 0.100701 | -4.83744 |
| SH2D3C       | -0.51719 | 3.203281 | -2.00631 | 0.046188 | 0.100755 | -4.8307  |
| TBC1D1       | -0.51239 | 5.569514 | -2.00613 | 0.046207 | 0.100782 | -5.12248 |
| LOC100129034 | -0.57235 | 5.996704 | -2.00571 | 0.046253 | 0.100865 | -5.13541 |
| KRT23        | 3.010629 | 2.665433 | 2.005535 | 0.046271 | 0.10089  | -4.2153  |
| ATP6V1C2     | 0.843402 | 3.053322 | 2.005177 | 0.04631  | 0.100958 | -4.55563 |
| EFHD2        | 0.495539 | 7.542222 | 2.004809 | 0.04635  | 0.101029 | -5.13443 |
| MLL2         | -0.33328 | 7.647799 | -2.00469 | 0.046362 | 0.101041 | -5.11636 |
| RANBP17      | -1.27078 | 0.151708 | -2.00381 | 0.046457 | 0.101232 | -4.39132 |
| C12orf35     | 0.528964 | 6.557338 | 2.003277 | 0.046515 | 0.101342 | -5.13015 |
| COX10        | -0.30473 | 4.289296 | -2.00276 | 0.046571 | 0.101448 | -4.99929 |
| C4orf48      | 0.85585  | 2.311361 | 2.002363 | 0.046614 | 0.101526 | -4.43419 |
| IDO1         | 2.464447 | 2.774682 | 2.00208  | 0.046645 | 0.101577 | -4.29772 |
| FXR1         | 0.416315 | 6.461118 | 2.001644 | 0.046692 | 0.101665 | -5.13374 |
| DFNB31       | -0.63356 | 3.314668 | -2.00091 | 0.046772 | 0.101822 | -4.88803 |
| RAG1         | 1.14277  | 1.906406 | 2.000236 | 0.046845 | 0.10195  | -4.3437  |
| NDUFA4       | -0.348   | 6.618413 | -2.00029 | 0.046839 | 0.10195  | -5.14588 |
| 1-Mar        | 0.673896 | 1.166047 | 2.000057 | 0.046865 | 0.101961 | -4.30212 |
| SYNRG        | -0.31242 | 5.797418 | -2.00006 | 0.046865 | 0.101961 | -5.1365  |
| ADAMTS2      | 1.358891 | 4.220282 | 1.999517 | 0.046924 | 0.102073 | -4.69724 |
| FBXO6        | 0.682901 | 3.718009 | 1.999411 | 0.046935 | 0.102082 | -4.72337 |
| HK2          | 0.717699 | 6.945685 | 1.999051 | 0.046974 | 0.102152 | -5.1445  |
| MEF2C        | -0.61318 | 3.888322 | -1.99855 | 0.047029 | 0.102255 | -4.99075 |
| LYNX1        | -1.35838 | 4.027853 | -1.99816 | 0.047072 | 0.102332 | -5.081   |
| ZNF362       | -0.44916 | 4.787269 | -1.99794 | 0.047096 | 0.102369 | -5.08082 |
| TMEM180      | 0.618994 | 2.942458 | 1.996054 | 0.047302 | 0.102791 | -4.58641 |
| LRRK1        | 0.438902 | 5.379721 | 1.996029 | 0.047305 | 0.102791 | -5.06378 |
| KIAA0196     | 0.378371 | 6.454094 | 1.995378 | 0.047377 | 0.10293  | -5.14696 |
| EXOSC10      | 0.276527 | 6.069326 | 1.995293 | 0.047386 | 0.102935 | -5.1344  |
| ZBTB7A       | -0.34765 | 7.169469 | -1.99464 | 0.047458 | 0.103076 | -5.14732 |
| HSPA8        | -0.35801 | 10.11366 | -1.99455 | 0.047468 | 0.103081 | -5.05283 |
| PMP22        | -0.65262 | 5.324861 | -1.99148 | 0.047807 | 0.103802 | -5.14561 |
| CHIC1        | -0.68244 | 3.55516  | -1.9912  | 0.047838 | 0.103852 | -4.96085 |
| ProSAPiP1    | -0.81533 | 4.668642 | -1.99105 | 0.047855 | 0.103872 | -5.11068 |

|          |          |          |          |          |          |          |
|----------|----------|----------|----------|----------|----------|----------|
| CNIH     | 0.28502  | 6.298483 | 1.990962 | 0.047864 | 0.103877 | -5.15307 |
| ANKS3    | -0.30897 | 3.243688 | -1.99087 | 0.047874 | 0.103881 | -4.82873 |
| ALOXE3   | 1.979398 | 0.689241 | 1.990397 | 0.047927 | 0.103964 | -4.18822 |
| F2RL2    | 1.429705 | 3.341797 | 1.990422 | 0.047924 | 0.103964 | -4.54457 |
| WBP11    | 0.310849 | 6.720314 | 1.990114 | 0.047958 | 0.104016 | -5.16525 |
| FYB      | 1.130949 | 4.422285 | 1.990003 | 0.047971 | 0.104027 | -4.80478 |
| DMRTA2   | 2.20865  | -0.25204 | 1.989068 | 0.048075 | 0.104223 | -4.18608 |
| ARID1B   | -0.24325 | 7.010777 | -1.98905 | 0.048076 | 0.104223 | -5.16319 |
| ALG13    | -0.29176 | 4.653573 | -1.98898 | 0.048084 | 0.104224 | -5.06901 |
| FOSL1    | 1.173511 | 5.408513 | 1.988668 | 0.048119 | 0.104284 | -4.99828 |
| CHST10   | -0.8097  | 1.95584  | -1.98852 | 0.048135 | 0.104287 | -4.65726 |
| STK39    | -0.61753 | 5.432206 | -1.98856 | 0.048131 | 0.104287 | -5.15464 |
| RPL36AL  | -0.3487  | 6.663785 | -1.98809 | 0.048184 | 0.104375 | -5.16913 |
| LACTB2   | 0.656495 | 4.546128 | 1.987644 | 0.048233 | 0.104467 | -4.92593 |
| CLEC2D   | 0.455705 | 4.007555 | 1.986516 | 0.048359 | 0.104723 | -4.85566 |
| MRE11A   | 0.364286 | 4.679975 | 1.984418 | 0.048594 | 0.105216 | -5.00576 |
| FAM128A  | 0.456456 | 4.727307 | 1.983785 | 0.048666 | 0.105354 | -5.00171 |
| FBLIM1   | 0.474427 | 6.644285 | 1.983274 | 0.048723 | 0.105462 | -5.17364 |
| NBN      | 0.338639 | 6.229732 | 1.981813 | 0.048888 | 0.105802 | -5.16589 |
| EIF3F    | -0.34337 | 6.325289 | -1.98083 | 0.048998 | 0.106025 | -5.18519 |
| NKAP     | 0.283007 | 3.795228 | 1.980509 | 0.049035 | 0.106072 | -4.85481 |
| DGKA     | 0.751965 | 5.833353 | 1.980517 | 0.049034 | 0.106072 | -5.11171 |
| ANKRD46  | -0.38191 | 4.115245 | -1.98007 | 0.049085 | 0.106163 | -5.02887 |
| TWF1     | 0.340579 | 7.318965 | 1.979355 | 0.049166 | 0.106322 | -5.18548 |
| ACTB     | 0.316992 | 12.68945 | 1.97902  | 0.049204 | 0.106388 | -5.01192 |
| WDR25    | -0.30567 | 2.483247 | -1.97853 | 0.049259 | 0.106491 | -4.68959 |
| ST7      | -0.33035 | 4.935262 | -1.97841 | 0.049273 | 0.106505 | -5.12204 |
| FARS2    | -0.30411 | 3.297091 | -1.97822 | 0.049295 | 0.106524 | -4.86337 |
| CMIP     | 0.367196 | 7.746414 | 1.978197 | 0.049297 | 0.106524 | -5.18043 |
| MTMR9    | -0.44676 | 4.550764 | -1.97812 | 0.049306 | 0.106526 | -5.0941  |
| QRICH1   | -0.25033 | 6.062645 | -1.97798 | 0.049322 | 0.106544 | -5.1859  |
| RABEP2   | -0.28724 | 4.235591 | -1.97722 | 0.049409 | 0.106715 | -5.03948 |
| PTP4A3   | -0.62775 | 4.225314 | -1.97692 | 0.049443 | 0.106772 | -5.0775  |
| ST8SIA1  | -0.83965 | 0.993756 | -1.97657 | 0.049483 | 0.106841 | -4.51998 |
| PPP1R14C | 3.082579 | 3.408756 | 1.976033 | 0.049544 | 0.106957 | -4.35549 |
| PAK4     | 0.309349 | 6.468786 | 1.974581 | 0.04971  | 0.107299 | -5.1899  |
| ATP11B   | -0.4484  | 7.487097 | -1.97434 | 0.049738 | 0.107342 | -5.17703 |
| XYLT1    | -0.68059 | 4.600753 | -1.97412 | 0.049763 | 0.10738  | -5.12816 |
| TMEM184B | 0.343297 | 7.084795 | 1.973793 | 0.0498   | 0.107444 | -5.19864 |
| TMEM104  | 0.318839 | 5.212667 | 1.971611 | 0.050051 | 0.107968 | -5.1045  |
| SLC22A3  | -1.01025 | 3.057821 | -1.9709  | 0.050132 | 0.108127 | -4.95563 |
| CRLF1    | -1.33131 | 0.633873 | -1.97077 | 0.050147 | 0.108143 | -4.54255 |
| C5orf22  | 0.363069 | 5.176112 | 1.970272 | 0.050205 | 0.108234 | -5.09832 |
| GPD2     | 0.390426 | 6.568997 | 1.97031  | 0.050201 | 0.108234 | -5.19883 |
| UPF3B    | 0.481998 | 4.398722 | 1.969876 | 0.050251 | 0.108316 | -4.96459 |
| LTB4R2   | 1.24196  | 3.732896 | 1.969216 | 0.050327 | 0.108464 | -4.68414 |
| ARF1     | 0.22892  | 8.958942 | 1.968799 | 0.050375 | 0.108551 | -5.1597  |
| RFX7     | 0.369963 | 5.440289 | 1.968576 | 0.050401 | 0.10859  | -5.12981 |
| MRPL15   | 0.358581 | 5.268589 | 1.968235 | 0.050441 | 0.108659 | -5.11325 |
| ANXA8L2  | 4.117596 | 3.538733 | 1.967578 | 0.050517 | 0.108806 | -4.27195 |
| LTK      | -1.28678 | 0.090783 | -1.9675  | 0.050526 | 0.108809 | -4.44992 |
| TRAFD1   | 0.320263 | 5.15713  | 1.965577 | 0.05075  | 0.109268 | -5.11026 |
| PDPR     | -0.44427 | 5.872483 | -1.96553 | 0.050755 | 0.109268 | -5.20935 |
| TMEM184C | -0.32774 | 4.858986 | -1.96452 | 0.050874 | 0.109506 | -5.14133 |
| WAC      | -0.2268  | 7.225272 | -1.96426 | 0.050903 | 0.109552 | -5.20725 |
| MIPOL1   | -0.4888  | 2.498101 | -1.96374 | 0.050964 | 0.109667 | -4.75535 |
| TFCP2    | 0.349631 | 4.807479 | 1.96289  | 0.051064 | 0.109848 | -5.06797 |
| UTP14C   | -0.39431 | 5.813204 | -1.9629  | 0.051062 | 0.109848 | -5.2115  |

|           |          |          |          |          |          |          |
|-----------|----------|----------|----------|----------|----------|----------|
| PREP      | 0.383437 | 5.804812 | 1.962712 | 0.051084 | 0.109876 | -5.17303 |
| DUSP16    | -0.48216 | 5.837534 | -1.96211 | 0.051155 | 0.110011 | -5.2158  |
| NDUFV1    | -0.39127 | 6.424095 | -1.96196 | 0.051172 | 0.11003  | -5.2215  |
| LRRC27    | -0.4851  | 1.753778 | -1.96129 | 0.051251 | 0.110179 | -4.61798 |
| BTG3      | 0.469555 | 5.041954 | 1.96124  | 0.051257 | 0.110179 | -5.08814 |
| CMBL      | -0.95635 | 4.667022 | -1.96031 | 0.051366 | 0.110397 | -5.17973 |
| SLFN5     | 0.642202 | 5.331647 | 1.959854 | 0.05142  | 0.110496 | -5.10749 |
| GOSR1     | -0.25689 | 5.998155 | -1.95944 | 0.051469 | 0.110584 | -5.22013 |
| KDM5B     | 0.411051 | 6.992373 | 1.959316 | 0.051484 | 0.110598 | -5.2265  |
| SUSD5     | -0.85386 | 0.504332 | -1.95898 | 0.051523 | 0.110666 | -4.47592 |
| SYK       | 0.655009 | 5.813709 | 1.958711 | 0.051555 | 0.110717 | -5.15965 |
| DNAJB2    | -0.30884 | 5.432252 | -1.95857 | 0.051571 | 0.110735 | -5.19871 |
| PAX9      | 2.405487 | 3.752562 | 1.958443 | 0.051587 | 0.110751 | -4.52894 |
| ACOT4     | 0.736769 | 1.379385 | 1.958261 | 0.051608 | 0.11078  | -4.40107 |
| CD82      | 0.524643 | 6.04338  | 1.957952 | 0.051645 | 0.110842 | -5.19066 |
| LOC645332 | 0.495044 | 2.034211 | 1.957796 | 0.051663 | 0.110864 | -4.52977 |
| SLC46A1   | -0.65295 | 3.977276 | -1.95715 | 0.05174  | 0.111011 | -5.08663 |
| C8orf42   | -0.91141 | 1.924887 | -1.95679 | 0.051783 | 0.111087 | -4.72857 |
| WDR85     | 0.302573 | 3.918648 | 1.956256 | 0.051846 | 0.111187 | -4.92254 |
| LPIN3     | 0.502834 | 4.661988 | 1.956284 | 0.051842 | 0.111187 | -5.03621 |
| NUDT4     | -0.43566 | 5.284014 | -1.95563 | 0.05192  | 0.111331 | -5.20206 |
| LCK       | 1.213581 | 2.684006 | 1.955074 | 0.051986 | 0.111454 | -4.5357  |
| SPEF2     | -0.85579 | 1.133958 | -1.95375 | 0.052143 | 0.111774 | -4.58405 |
| ONECUT2   | 3.174501 | 3.470916 | 1.953595 | 0.052162 | 0.111797 | -4.39023 |
| CCDC87    | 0.848594 | 0.029858 | 1.953506 | 0.052173 | 0.111803 | -4.25241 |
| MRPS22    | 0.356886 | 4.808465 | 1.953176 | 0.052212 | 0.11187  | -5.08603 |
| ZNF497    | 0.64639  | 1.718573 | 1.952455 | 0.052298 | 0.112038 | -4.47232 |
| COX11     | -0.28914 | 5.23548  | -1.95229 | 0.052317 | 0.112062 | -5.19549 |
| OTUD7B    | -0.27274 | 5.308338 | -1.95196 | 0.052358 | 0.112131 | -5.20085 |
| CYP26B1   | 1.262607 | 2.796086 | 1.951649 | 0.052394 | 0.112175 | -4.55349 |
| ALS2CR4   | 0.630767 | 4.530262 | 1.951701 | 0.052388 | 0.112175 | -4.99964 |
| CTNNA1    | -0.30741 | 8.745153 | -1.95136 | 0.052429 | 0.112231 | -5.18405 |
| HNMT      | -0.7694  | 3.767657 | -1.95103 | 0.052468 | 0.112299 | -5.08138 |
| HPS1      | -0.31735 | 6.022903 | -1.9508  | 0.052496 | 0.11234  | -5.23859 |
| MCF2L     | -0.81451 | 5.040045 | -1.95061 | 0.052518 | 0.112372 | -5.2163  |
| CCL18     | 1.855841 | 3.018633 | 1.950519 | 0.05253  | 0.112379 | -4.50785 |
| FAM158A   | 0.432287 | 2.36847  | 1.95045  | 0.052538 | 0.112379 | -4.60641 |
| FMN1      | -0.88225 | 1.900082 | -1.95018 | 0.05257  | 0.112426 | -4.72487 |
| CUEDC2    | -0.33243 | 4.61486  | -1.95007 | 0.052584 | 0.112426 | -5.1439  |
| MLLT4     | -0.46925 | 7.37738  | -1.95007 | 0.052584 | 0.112426 | -5.22608 |
| KCNQ5     | -1.34768 | 0.205058 | -1.94992 | 0.052601 | 0.112446 | -4.51874 |
| MGLL      | -0.87291 | 6.383276 | -1.94985 | 0.05261  | 0.112446 | -5.23946 |
| LGALS3BP  | 0.456305 | 9.716713 | 1.949718 | 0.052626 | 0.112464 | -5.17711 |
| S100A13   | 0.433627 | 4.528408 | 1.948535 | 0.052768 | 0.112751 | -5.039   |
| TTN       | -0.59917 | 3.127115 | -1.94819 | 0.052809 | 0.112821 | -4.9395  |
| PSPH      | 0.679492 | 3.955285 | 1.947953 | 0.052838 | 0.112866 | -4.87245 |
| NR3C1     | -0.60719 | 5.932765 | -1.94754 | 0.052888 | 0.112956 | -5.24757 |
| ZNF675    | -0.81171 | 2.217822 | -1.94713 | 0.052938 | 0.11301  | -4.78953 |
| FAM3D     | -1.68822 | 2.312027 | -1.94709 | 0.052943 | 0.11301  | -4.95984 |
| BRAF      | -0.33388 | 3.635116 | -1.94707 | 0.052945 | 0.11301  | -5.00098 |
| USP37     | 0.397725 | 5.093574 | 1.94706  | 0.052946 | 0.11301  | -5.12929 |
| PABPC3    | 0.457608 | 6.104205 | 1.946916 | 0.052963 | 0.11303  | -5.22012 |
| NUPR1     | -0.82181 | 4.81052  | -1.94663 | 0.052998 | 0.113069 | -5.20964 |
| SLC38A1   | 0.442042 | 7.889612 | 1.946683 | 0.052992 | 0.113069 | -5.23937 |
| PPP1CC    | 0.224525 | 7.422937 | 1.946015 | 0.053072 | 0.11321  | -5.24614 |
| ITGA1     | -0.69466 | 5.440376 | -1.94593 | 0.053083 | 0.113215 | -5.2399  |
| HBEGF     | -0.72811 | 4.884368 | -1.94505 | 0.053189 | 0.113424 | -5.21152 |
| TBX5      | 1.324488 | 0.771581 | 1.944461 | 0.053261 | 0.113543 | -4.29015 |

|           |          |          |          |          |          |          |
|-----------|----------|----------|----------|----------|----------|----------|
| EDARADD   | -0.83507 | 2.857674 | -1.9445  | 0.053256 | 0.113543 | -4.93338 |
| PRSS21    | 2.548575 | 0.673459 | 1.944252 | 0.053286 | 0.113579 | -4.27283 |
| CAND1     | 0.371871 | 7.471825 | 1.944034 | 0.053312 | 0.113618 | -5.25135 |
| FLII      | -0.30167 | 7.466495 | -1.94339 | 0.053391 | 0.113767 | -5.24035 |
| IFFO2     | 0.873166 | 6.270779 | 1.943322 | 0.053399 | 0.113768 | -5.2119  |
| ILKAP     | 0.23946  | 3.854355 | 1.943193 | 0.053415 | 0.113784 | -4.94645 |
| TAF13     | -0.34639 | 2.446898 | -1.94312 | 0.053424 | 0.113786 | -4.758   |
| PIGF      | 0.343293 | 3.598536 | 1.941799 | 0.053584 | 0.114111 | -4.87098 |
| LOC150381 | -0.49333 | 1.170353 | -1.94157 | 0.053613 | 0.114137 | -4.56016 |
| CNGA1     | -0.87904 | 1.080362 | -1.94156 | 0.053613 | 0.114137 | -4.60032 |
| EVC2      | -0.95028 | 1.186396 | -1.94137 | 0.053637 | 0.114146 | -4.63352 |
| PLXND1    | 0.582083 | 6.574458 | 1.941401 | 0.053633 | 0.114146 | -5.24836 |
| CCDC85C   | -0.43764 | 5.913456 | -1.94133 | 0.053642 | 0.114146 | -5.25648 |
| PLB1      | 0.862955 | 1.514165 | 1.940743 | 0.053713 | 0.114264 | -4.43708 |
| BOK       | -0.49258 | 5.457506 | -1.94081 | 0.053705 | 0.114264 | -5.24282 |
| FOXP4     | -0.56863 | 7.413771 | -1.9405  | 0.053744 | 0.114311 | -5.24089 |
| DBN1      | -0.60306 | 5.947417 | -1.94026 | 0.053772 | 0.114354 | -5.26156 |
| ZNF84     | -0.44542 | 4.618883 | -1.93915 | 0.053908 | 0.114625 | -5.17616 |
| PLTP      | -0.89936 | 6.569582 | -1.93898 | 0.05393  | 0.114654 | -5.25638 |
| VPS13A    | -0.48476 | 6.014061 | -1.9384  | 0.054    | 0.114787 | -5.26475 |
| MAPRE3    | -0.58454 | 3.805441 | -1.93793 | 0.054058 | 0.114874 | -5.09015 |
| LZTS2     | -0.35302 | 6.025216 | -1.93795 | 0.054056 | 0.114874 | -5.26383 |
| C20orf111 | 0.291284 | 5.179838 | 1.937724 | 0.054083 | 0.114911 | -5.16879 |
| CDK5R1    | 1.096954 | 3.168468 | 1.937249 | 0.054142 | 0.115017 | -4.66703 |
| CDA       | 1.857491 | 3.223278 | 1.93713  | 0.054157 | 0.115031 | -4.56276 |
| MKL1      | -0.30132 | 5.864148 | -1.93639 | 0.054248 | 0.115208 | -5.26122 |
| SON       | -0.24907 | 8.662798 | -1.93625 | 0.054265 | 0.115226 | -5.21746 |
| EHF       | 1.094961 | 6.573253 | 1.936064 | 0.054288 | 0.115257 | -5.23173 |
| ADAMTS6   | 0.915983 | 1.352949 | 1.935761 | 0.054325 | 0.115284 | -4.41643 |
| ZSCAN22   | -0.33102 | 2.812237 | -1.93589 | 0.054309 | 0.115284 | -4.84415 |
| EIF2S1    | 0.308603 | 6.383675 | 1.935806 | 0.05432  | 0.115284 | -5.26147 |
| GLDN      | -0.74828 | 1.221098 | -1.93534 | 0.054377 | 0.115378 | -4.62109 |
| STEAP4    | -1.12329 | 3.947891 | -1.9348  | 0.054443 | 0.1155   | -5.17398 |
| PRR3      | 0.427775 | 3.413298 | 1.934407 | 0.054492 | 0.115586 | -4.83279 |
| KIAA0040  | -0.48877 | 5.818894 | -1.93431 | 0.054505 | 0.115595 | -5.26853 |
| IFT20     | -0.31214 | 3.594446 | -1.93391 | 0.054553 | 0.115681 | -5.01077 |
| UBE2D4    | -0.3389  | 3.236979 | -1.9336  | 0.054592 | 0.115728 | -4.94269 |
| ABCB6     | 0.7124   | 4.992114 | 1.933608 | 0.054591 | 0.115728 | -5.10325 |
| S100A2    | 4.162581 | 6.313707 | 1.933403 | 0.054617 | 0.115745 | -4.72808 |
| TMEM179B  | 0.337722 | 5.514374 | 1.933453 | 0.054611 | 0.115745 | -5.20657 |
| LOC284441 | 0.350857 | 1.823267 | 1.932501 | 0.054729 | 0.115947 | -4.56443 |
| TAF15     | 0.269775 | 7.049211 | 1.932518 | 0.054727 | 0.115947 | -5.27748 |
| KLK6      | 4.261232 | 3.851124 | 1.93159  | 0.054842 | 0.116132 | -4.35519 |
| POLR3C    | 0.233976 | 4.639481 | 1.931577 | 0.054843 | 0.116132 | -5.11877 |
| HLA-E     | 0.438362 | 8.726371 | 1.931627 | 0.054837 | 0.116132 | -5.24503 |
| SEPW1     | -0.39257 | 6.441754 | -1.93153 | 0.054849 | 0.116132 | -5.27945 |
| NDUFB10   | -0.3612  | 5.565952 | -1.93109 | 0.054904 | 0.116225 | -5.26107 |
| THRAP3    | -0.17857 | 7.179867 | -1.93104 | 0.05491  | 0.116225 | -5.27242 |
| STX2      | -0.47487 | 3.561325 | -1.93076 | 0.054945 | 0.116282 | -5.04181 |
| ZNF706    | 0.384152 | 5.588633 | 1.930617 | 0.054963 | 0.116302 | -5.21527 |
| TRIM4     | -0.36237 | 5.088093 | -1.92997 | 0.055043 | 0.116454 | -5.23125 |
| FOKK1     | 0.371327 | 6.831728 | 1.92873  | 0.055198 | 0.116765 | -5.28377 |
| SPATA5    | 0.393248 | 4.033362 | 1.928485 | 0.055229 | 0.116794 | -4.98253 |
| TMEM106C  | 0.414927 | 5.882469 | 1.928491 | 0.055228 | 0.116794 | -5.24208 |
| GAS8      | -0.34299 | 4.113838 | -1.92835 | 0.055246 | 0.116812 | -5.12293 |
| TYRO3     | -0.48289 | 4.407924 | -1.92826 | 0.055258 | 0.116819 | -5.17649 |
| FMO1      | 1.523633 | 0.50854  | 1.927743 | 0.055322 | 0.116938 | -4.30156 |
| SLC25A36  | -0.44869 | 6.651914 | -1.92714 | 0.055398 | 0.117081 | -5.28481 |

|          |          |          |          |          |          |          |
|----------|----------|----------|----------|----------|----------|----------|
| FAM200B  | -0.31228 | 3.724986 | -1.92692 | 0.055426 | 0.117122 | -5.05379 |
| TNRC6B   | -0.3227  | 6.380553 | -1.9268  | 0.05544  | 0.117134 | -5.28873 |
| SH2B2    | 0.649957 | 2.083662 | 1.92672  | 0.05545  | 0.117138 | -4.57618 |
| CCDC46   | -0.65627 | 1.931819 | -1.92656 | 0.05547  | 0.117162 | -4.74323 |
| ZNF7     | 0.30512  | 4.523676 | 1.925552 | 0.055597 | 0.117413 | -5.10137 |
| MGC72080 | 0.692409 | 2.44312  | 1.924673 | 0.055708 | 0.117559 | -4.62831 |
| DLEU1    | 0.498318 | 2.5331   | 1.924468 | 0.055734 | 0.117559 | -4.67298 |
| PPP4R1L  | 0.567946 | 2.631368 | 1.924732 | 0.0557   | 0.117559 | -4.67651 |
| FPR3     | 1.025475 | 3.145775 | 1.924805 | 0.055691 | 0.117559 | -4.69767 |
| DUS3L    | 0.36716  | 4.329787 | 1.92447  | 0.055733 | 0.117559 | -5.0571  |
| RSPRY1   | -0.2844  | 4.513128 | -1.92459 | 0.055718 | 0.117559 | -5.17531 |
| TTL      | 0.370624 | 5.720023 | 1.924634 | 0.055713 | 0.117559 | -5.23983 |
| CTNNB1   | 0.35578  | 8.354309 | 1.924878 | 0.055682 | 0.117559 | -5.26715 |
| PMM2     | 0.369303 | 5.837525 | 1.924304 | 0.055754 | 0.117585 | -5.24963 |
| ACAP2    | 0.43072  | 6.9019   | 1.923598 | 0.055843 | 0.117755 | -5.29356 |
| EDEM3    | -0.46691 | 6.609155 | -1.92346 | 0.055861 | 0.117774 | -5.29214 |
| SLC6A14  | 3.240315 | 3.232185 | 1.922192 | 0.056021 | 0.118094 | -4.40828 |
| PDE3A    | -0.95568 | 2.03487  | -1.92208 | 0.056035 | 0.118106 | -4.8264  |
| DAGLA    | -0.77309 | 3.767427 | -1.92192 | 0.056056 | 0.118132 | -5.13793 |
| CLEC16A  | -0.271   | 5.569737 | -1.92176 | 0.056075 | 0.118155 | -5.27483 |
| CYB5D1   | -0.29441 | 4.203819 | -1.92146 | 0.056113 | 0.118217 | -5.14241 |
| MCF2L2   | 0.775411 | 0.380186 | 1.919727 | 0.056334 | 0.118664 | -4.34265 |
| CIC      | -0.31348 | 7.103668 | -1.9194  | 0.056376 | 0.118735 | -5.29353 |
| C13orf23 | 0.400402 | 6.559452 | 1.919225 | 0.056398 | 0.118763 | -5.29562 |
| EED      | 0.33536  | 4.174698 | 1.919092 | 0.056415 | 0.11878  | -5.04117 |
| C9orf69  | 0.366018 | 5.908235 | 1.919015 | 0.056425 | 0.118783 | -5.26536 |
| ING2     | -0.3333  | 3.11736  | -1.91832 | 0.056513 | 0.118933 | -4.94536 |
| MRPS35   | 0.461201 | 6.022248 | 1.918323 | 0.056513 | 0.118933 | -5.2684  |
| CXorf42  | 0.449954 | -0.0528  | 1.917863 | 0.056572 | 0.119039 | -4.32941 |
| SPATA2   | 0.367307 | 5.253923 | 1.917751 | 0.056586 | 0.119051 | -5.20651 |
| SNHG5    | -0.68756 | 5.477176 | -1.9172  | 0.056656 | 0.11918  | -5.29525 |
| GTPBP2   | 0.401518 | 5.989492 | 1.916995 | 0.056682 | 0.119218 | -5.27243 |
| ZNF263   | -0.23316 | 4.752102 | -1.91674 | 0.056714 | 0.119268 | -5.21228 |
| RAB28    | -0.28783 | 3.499091 | -1.91619 | 0.056786 | 0.1194   | -5.02181 |
| MRPS21   | 0.422712 | 5.26202  | 1.9155   | 0.056874 | 0.119567 | -5.20645 |
| LRRTM2   | -0.60499 | 0.115987 | -1.91515 | 0.056919 | 0.119643 | -4.47001 |
| CNTROB   | 0.319868 | 4.839429 | 1.915026 | 0.056935 | 0.119658 | -5.16665 |
| IFNAR2   | 0.399038 | 4.232539 | 1.914796 | 0.056964 | 0.119703 | -5.05056 |
| RIN1     | 0.693346 | 4.615199 | 1.914713 | 0.056975 | 0.119707 | -5.0733  |
| HEATR6   | 0.325824 | 4.513457 | 1.914199 | 0.057041 | 0.119828 | -5.11821 |
| NCDN     | -0.32881 | 5.302933 | -1.91359 | 0.05712  | 0.119975 | -5.2766  |
| CLCN3    | -0.46272 | 6.201449 | -1.91343 | 0.05714  | 0.120001 | -5.31359 |
| COPS4    | -0.24527 | 5.089051 | -1.91298 | 0.057197 | 0.120102 | -5.25447 |
| TRRAP    | 0.375113 | 7.33509  | 1.912847 | 0.057215 | 0.120121 | -5.31248 |
| ZBTB7C   | -1.17306 | 4.708873 | -1.91242 | 0.05727  | 0.12022  | -5.28643 |
| TAF4B    | 0.663831 | 3.763789 | 1.912163 | 0.057303 | 0.12027  | -4.90297 |
| IPPK     | 0.594996 | 4.774392 | 1.912073 | 0.057315 | 0.120276 | -5.12563 |
| MOBK2C   | -0.37172 | 4.551969 | -1.91155 | 0.057383 | 0.120401 | -5.21379 |
| ALDH7A1  | -0.64163 | 4.632675 | -1.91112 | 0.057438 | 0.120481 | -5.24728 |
| GNA13    | 0.309185 | 7.337086 | 1.911132 | 0.057436 | 0.120481 | -5.31481 |
| NPTN     | -0.29736 | 6.832431 | -1.91094 | 0.057461 | 0.12051  | -5.31467 |
| TRMT61B  | 0.304073 | 3.737111 | 1.910797 | 0.057479 | 0.120514 | -4.96944 |
| CDKN1A   | -0.60546 | 7.061499 | -1.9108  | 0.057479 | 0.120514 | -5.30499 |
| ADAMTSL5 | 0.98549  | 3.079625 | 1.910687 | 0.057494 | 0.120525 | -4.71716 |
| CRLS1    | -0.388   | 5.602305 | -1.91046 | 0.057523 | 0.120568 | -5.30261 |
| CDK20    | -0.74622 | 1.372465 | -1.90912 | 0.057696 | 0.120914 | -4.69231 |
| LYPD3    | 2.72837  | 5.740412 | 1.908431 | 0.057786 | 0.121048 | -4.92894 |
| TSFM     | 0.297374 | 4.351958 | 1.908479 | 0.05778  | 0.121048 | -5.10358 |

|              |          |          |          |          |          |          |
|--------------|----------|----------|----------|----------|----------|----------|
| SLC35A3      | -0.50573 | 4.552035 | -1.90854 | 0.057772 | 0.121048 | -5.23105 |
| MED24        | 0.431965 | 6.635986 | 1.908266 | 0.057808 | 0.121075 | -5.31746 |
| BAG4         | 0.475318 | 3.656462 | 1.907756 | 0.057874 | 0.121196 | -4.92375 |
| GABARAPL2    | -0.2777  | 5.479579 | -1.90755 | 0.057901 | 0.121235 | -5.29663 |
| RAD1         | 0.329055 | 4.672007 | 1.907279 | 0.057936 | 0.121289 | -5.15656 |
| GZMB         | 1.170926 | 1.703901 | 1.906874 | 0.057989 | 0.121327 | -4.4871  |
| PROCR        | 0.756358 | 4.186888 | 1.906939 | 0.05798  | 0.121327 | -4.98552 |
| MEIS3P1      | -0.72113 | 3.11225  | -1.90691 | 0.057984 | 0.121327 | -5.04187 |
| SSBP1        | 0.345047 | 5.433507 | 1.90701  | 0.057971 | 0.121327 | -5.24812 |
| C5orf13      | 0.66629  | 5.318191 | 1.905867 | 0.05812  | 0.121583 | -5.2045  |
| GUCY1A2      | 0.90764  | 0.114775 | 1.905733 | 0.058138 | 0.121584 | -4.33873 |
| TMEM149      | 0.553781 | 2.366935 | 1.905731 | 0.058138 | 0.121584 | -4.67154 |
| UBFD1        | 0.289208 | 5.980015 | 1.905554 | 0.058161 | 0.121614 | -5.30004 |
| EXOSC3       | 0.37324  | 3.791277 | 1.905193 | 0.058208 | 0.121676 | -4.97837 |
| ANKFY1       | -0.32051 | 6.669503 | -1.90523 | 0.058204 | 0.121676 | -5.32743 |
| ORAI2        | 0.624103 | 4.607777 | 1.905091 | 0.058222 | 0.121686 | -5.1026  |
| TBC1D22A     | -0.29745 | 4.906698 | -1.90492 | 0.058245 | 0.121687 | -5.25636 |
| HS1BP3       | -0.30315 | 4.945516 | -1.90497 | 0.058238 | 0.121687 | -5.26044 |
| PTRF         | -0.67279 | 7.499115 | -1.90489 | 0.058248 | 0.121687 | -5.3029  |
| RWDD3        | -0.28847 | 2.969905 | -1.90474 | 0.058268 | 0.12171  | -4.92735 |
| DPP8         | -0.25651 | 4.982639 | -1.90452 | 0.058297 | 0.121752 | -5.26107 |
| GATC         | 0.36666  | 1.30408  | 1.904369 | 0.058316 | 0.121774 | -4.53585 |
| EIF3H        | 0.32928  | 7.994682 | 1.903967 | 0.058369 | 0.121866 | -5.31536 |
| FAM179B      | -0.31201 | 4.785928 | -1.90373 | 0.0584   | 0.121914 | -5.24793 |
| TPCN1        | -0.47661 | 5.853951 | -1.90283 | 0.058518 | 0.122142 | -5.32839 |
| PANK2        | 0.296975 | 4.357229 | 1.902587 | 0.05855  | 0.122171 | -5.11693 |
| SMARCA4      | 0.333503 | 7.586535 | 1.902632 | 0.058544 | 0.122171 | -5.3267  |
| DECR1        | -0.33645 | 5.283766 | -1.90251 | 0.05856  | 0.122174 | -5.29621 |
| RABGEF1      | -0.30653 | 5.64147  | -1.90233 | 0.058584 | 0.122206 | -5.31654 |
| DHX30        | -0.24695 | 6.400158 | -1.90155 | 0.058686 | 0.1224   | -5.33602 |
| MMP25        | 0.769275 | 1.529474 | 1.90141  | 0.058705 | 0.122421 | -4.5223  |
| SEMA4F       | 0.56595  | 3.305822 | 1.901221 | 0.05873  | 0.122443 | -4.84408 |
| C14orf126    | 0.498726 | 4.153295 | 1.901196 | 0.058733 | 0.122443 | -5.04015 |
| ZNF193       | -0.40531 | 2.059839 | -1.90069 | 0.0588   | 0.122565 | -4.7727  |
| TBX3         | 0.802267 | 4.515395 | 1.900138 | 0.058872 | 0.122697 | -5.0581  |
| ZDHHC11      | -0.88    | 2.038742 | -1.89962 | 0.058941 | 0.122821 | -4.85045 |
| PSTPIP1      | 0.8189   | 1.0444   | 1.899211 | 0.058995 | 0.122916 | -4.45592 |
| GYG2         | -0.98934 | 1.723136 | -1.8991  | 0.05901  | 0.122929 | -4.80474 |
| LRRC32       | -0.62049 | 4.749839 | -1.89866 | 0.059068 | 0.123031 | -5.28041 |
| JPH1         | 1.307862 | 3.513748 | 1.898348 | 0.059109 | 0.123099 | -4.76456 |
| ZNF165       | 0.710129 | 2.342016 | 1.897846 | 0.059176 | 0.123219 | -4.65828 |
| BMP8B        | 0.838663 | 2.859713 | 1.897239 | 0.059256 | 0.123368 | -4.72533 |
| PTAFR        | 0.794089 | 2.990499 | 1.896509 | 0.059353 | 0.123552 | -4.75733 |
| DCP1B        | -0.5019  | 3.624581 | -1.89632 | 0.059378 | 0.123585 | -5.12409 |
| LOC100130932 | 0.435491 | 2.314409 | 1.8956   | 0.059474 | 0.123767 | -4.69848 |
| ZNF486       | -1.0622  | 0.215716 | -1.8949  | 0.059568 | 0.123925 | -4.57883 |
| APITD1       | 0.445484 | 3.210754 | 1.894901 | 0.059567 | 0.123925 | -4.85885 |
| PLA2G6       | -0.42096 | 4.010019 | -1.89426 | 0.059653 | 0.124084 | -5.1801  |
| ZNF555       | -0.31228 | 1.746692 | -1.89386 | 0.059706 | 0.124175 | -4.71778 |
| PIM3         | -0.40714 | 6.744735 | -1.89365 | 0.059735 | 0.124216 | -5.34671 |
| CLDN23       | -0.9316  | 3.229393 | -1.89348 | 0.059757 | 0.124245 | -5.11684 |
| HLA-DQA1     | 1.317212 | 4.718152 | 1.89326  | 0.059786 | 0.124287 | -5.01853 |
| GANAB        | 0.272802 | 8.932341 | 1.893076 | 0.059811 | 0.124319 | -5.30517 |
| ANAPC11      | 0.344842 | 5.52738  | 1.892946 | 0.059828 | 0.124337 | -5.28335 |
| PLA1A        | -1.14611 | 0.048969 | -1.89214 | 0.059936 | 0.124524 | -4.56917 |
| DHRS3        | -0.56364 | 5.883256 | -1.89216 | 0.059933 | 0.124524 | -5.3504  |
| NSMCE2       | 0.402436 | 3.712063 | 1.891589 | 0.06001  | 0.124659 | -4.98002 |
| GRSF1        | -0.23942 | 6.582208 | -1.89114 | 0.060069 | 0.124764 | -5.35521 |



|          |          |          |          |          |          |          |
|----------|----------|----------|----------|----------|----------|----------|
| AMH      | 1.434225 | 0.413125 | 1.891022 | 0.060086 | 0.12478  | -4.36643 |
| GPX2     | 1.52696  | 7.35155  | 1.890822 | 0.060113 | 0.124817 | -5.33784 |
| C9orf123 | -0.39422 | 4.439313 | -1.89062 | 0.060139 | 0.124817 | -5.24126 |
| RAP2A    | 0.359108 | 5.597133 | 1.890664 | 0.060134 | 0.124817 | -5.29343 |
| RBM12    | 0.208931 | 6.601354 | 1.890661 | 0.060134 | 0.124817 | -5.35398 |
| YIF1A    | 0.346396 | 5.805185 | 1.889689 | 0.060265 | 0.125059 | -5.31345 |
| C9orf72  | -0.47672 | 3.917609 | -1.88911 | 0.060344 | 0.125204 | -5.18398 |
| QTRT1    | 0.314475 | 4.293489 | 1.888463 | 0.06043  | 0.125365 | -5.12671 |
| RNASEN   | 0.308386 | 6.11633  | 1.888227 | 0.060462 | 0.125412 | -5.33898 |
| DDX19B   | -0.38063 | 3.928959 | -1.88786 | 0.060512 | 0.125496 | -5.1738  |
| RDH14    | -0.22908 | 3.77599  | -1.88771 | 0.060532 | 0.125501 | -5.12144 |
| SBDS     | -0.3913  | 6.36263  | -1.88771 | 0.060532 | 0.125501 | -5.36181 |
| TARS     | 0.343251 | 6.799073 | 1.887349 | 0.060581 | 0.125583 | -5.36113 |
| RAB5A    | -0.25724 | 5.893161 | -1.8872  | 0.060601 | 0.125607 | -5.35309 |
| WNT11    | 1.847103 | 1.189621 | 1.886879 | 0.060644 | 0.125659 | -4.38528 |
| TMEM208  | 0.359454 | 4.557201 | 1.886909 | 0.06064  | 0.125659 | -5.17016 |
| ZNF140   | -0.39213 | 3.783765 | -1.88633 | 0.060719 | 0.125786 | -5.154   |
| SLC25A13 | 0.46025  | 5.311632 | 1.886296 | 0.060723 | 0.125786 | -5.26206 |
| POU2F3   | 1.217109 | 1.236392 | 1.88619  | 0.060737 | 0.125797 | -4.45647 |
| C12orf62 | -0.30009 | 4.151535 | -1.88529 | 0.06086  | 0.126032 | -5.2027  |
| CHD3     | -0.39465 | 7.443292 | -1.88517 | 0.060876 | 0.126046 | -5.3481  |
| METTL9   | -0.25191 | 6.441114 | -1.88481 | 0.060925 | 0.126129 | -5.36724 |
| C11orf83 | 0.440273 | 3.338894 | 1.883144 | 0.061151 | 0.126579 | -4.9066  |
| MPV17    | 0.337105 | 5.276002 | 1.88299  | 0.061172 | 0.126603 | -5.27712 |
| ZNF286B  | 0.611631 | 0.821099 | 1.882805 | 0.061198 | 0.126635 | -4.4801  |
| SORCS2   | -0.93882 | 1.883776 | -1.88273 | 0.061208 | 0.126635 | -4.86727 |
| KLF3     | -0.34357 | 7.371653 | -1.88268 | 0.061215 | 0.126635 | -5.35554 |
| PDF      | 0.372003 | 2.991421 | 1.882597 | 0.061226 | 0.126639 | -4.85076 |
| SAMSN1   | 0.866043 | 2.569589 | 1.882136 | 0.061289 | 0.126751 | -4.7037  |
| RXRβ     | -0.24171 | 5.051462 | -1.88187 | 0.061325 | 0.126807 | -5.30848 |
| DDX20    | 0.296877 | 4.366395 | 1.881725 | 0.061345 | 0.126829 | -5.15639 |
| SPI1     | 0.883486 | 3.756391 | 1.881165 | 0.061421 | 0.126968 | -4.91881 |
| LPAR3    | 2.353015 | 0.673568 | 1.880864 | 0.061463 | 0.127035 | -4.38579 |
| CD55     | 0.866094 | 7.094842 | 1.880776 | 0.061475 | 0.127041 | -5.36943 |
| GALNT11  | -0.3953  | 4.901898 | -1.88009 | 0.061568 | 0.127215 | -5.31016 |
| CCDC61   | -0.30544 | 2.571348 | -1.87995 | 0.061588 | 0.127238 | -4.89056 |
| ARHGEF7  | -0.30546 | 6.20818  | -1.8798  | 0.061609 | 0.127261 | -5.37509 |
| AVL9     | 0.40797  | 4.583798 | 1.879596 | 0.061636 | 0.127281 | -5.18064 |
| CSNK1D   | -0.21251 | 7.161123 | -1.87962 | 0.061634 | 0.127281 | -5.36826 |
| KRT15    | 3.084191 | 5.693289 | 1.879028 | 0.061714 | 0.127423 | -4.8981  |
| ATF1     | 0.278303 | 4.737863 | 1.878323 | 0.061811 | 0.127604 | -5.22618 |
| RPL13A   | -0.4407  | 7.500326 | -1.87756 | 0.061916 | 0.127803 | -5.35954 |
| NUDT2    | -0.36438 | 3.026668 | -1.87704 | 0.061987 | 0.127911 | -5.00545 |
| CDK14    | -0.72855 | 3.94343  | -1.87708 | 0.061982 | 0.127911 | -5.24098 |
| DCUN1D1  | 0.396872 | 5.099485 | 1.876604 | 0.062048 | 0.128017 | -5.26221 |
| KIAA1468 | -0.42919 | 5.566794 | -1.87619 | 0.062105 | 0.128116 | -5.36633 |
| UBA1     | 0.258457 | 8.892719 | 1.876063 | 0.062122 | 0.128133 | -5.33758 |
| SLC22A23 | -0.6056  | 6.385303 | -1.87579 | 0.06216  | 0.128192 | -5.38208 |
| ZBED2    | 2.019103 | 1.170816 | 1.874981 | 0.062272 | 0.128387 | -4.39821 |
| ZNF620   | -0.70335 | 1.126704 | -1.87497 | 0.062273 | 0.128387 | -4.70673 |
| PDPN     | 1.093233 | 4.977171 | 1.873703 | 0.062449 | 0.12873  | -5.14751 |
| CD4      | 0.773543 | 4.710674 | 1.873436 | 0.062486 | 0.128788 | -5.15384 |
| TUSC1    | -0.70285 | 3.008668 | -1.87307 | 0.062536 | 0.128873 | -5.0755  |
| NAGA     | 0.257891 | 5.653905 | 1.87214  | 0.062666 | 0.129121 | -5.34029 |
| PLSCR4   | -0.61011 | 4.287367 | -1.87152 | 0.062752 | 0.12924  | -5.28187 |
| CARHSP1  | 0.478814 | 5.840123 | 1.871523 | 0.062752 | 0.12924  | -5.3403  |
| EXOC7    | -0.26011 | 7.256585 | -1.87154 | 0.06275  | 0.12924  | -5.3803  |
| RNGTT    | 0.281884 | 4.782756 | 1.871392 | 0.06277  | 0.129259 | -5.24461 |

|           |          |          |          |          |          |          |
|-----------|----------|----------|----------|----------|----------|----------|
| ATP8B3    | 1.096352 | 0.985264 | 1.87125  | 0.06279  | 0.129281 | -4.46694 |
| PIP4K2A   | -0.35307 | 4.686233 | -1.87095 | 0.062831 | 0.129347 | -5.30178 |
| PAK6      | 0.811464 | 4.702899 | 1.870857 | 0.062845 | 0.129355 | -5.15007 |
| TEX9      | -0.68648 | 1.100986 | -1.86966 | 0.063012 | 0.129681 | -4.70993 |
| WDR8      | 0.273609 | 4.291069 | 1.869156 | 0.063082 | 0.129787 | -5.1686  |
| GTF2A2    | 0.31347  | 4.975318 | 1.869221 | 0.063073 | 0.129787 | -5.26958 |
| IFT80     | 0.439005 | 5.041268 | 1.868356 | 0.063194 | 0.129998 | -5.26508 |
| NDUFA6    | -0.30087 | 5.52445  | -1.86812 | 0.063228 | 0.130048 | -5.37348 |
| FAM59A    | -0.5744  | 4.295739 | -1.86768 | 0.063289 | 0.130156 | -5.2847  |
| SLC7A11   | 1.220076 | 5.614602 | 1.867405 | 0.063327 | 0.130186 | -5.24579 |
| RNF34     | 0.236613 | 4.920788 | 1.867481 | 0.063316 | 0.130186 | -5.27445 |
| DHX16     | 0.237132 | 5.543456 | 1.86737  | 0.063332 | 0.130186 | -5.34099 |
| C14orf176 | 1.045353 | 0.396952 | 1.867293 | 0.063343 | 0.130189 | -4.4109  |
| PCDHGA1   | 0.965503 | 0.181988 | 1.866816 | 0.06341  | 0.13028  | -4.40754 |
| APOBEC3G  | 0.955545 | 3.006933 | 1.866778 | 0.063415 | 0.13028  | -4.79031 |
| CWF19L2   | -0.36705 | 4.456235 | -1.86682 | 0.063409 | 0.13028  | -5.28461 |
| TMEM218   | -0.30172 | 2.802154 | -1.86638 | 0.063471 | 0.130376 | -4.96335 |
| CHD7      | 0.474437 | 5.747632 | 1.866202 | 0.063496 | 0.130408 | -5.34204 |
| PANK1     | -0.55355 | 3.100507 | -1.866   | 0.063524 | 0.130446 | -5.0767  |
| WNK2      | -1.03267 | 5.515473 | -1.86581 | 0.063552 | 0.130484 | -5.39868 |
| PAXIP1    | 0.356703 | 4.670282 | 1.865323 | 0.06362  | 0.130605 | -5.22927 |
| TTC21A    | -0.58363 | 1.019253 | -1.86489 | 0.06368  | 0.13071  | -4.69063 |
| KLK10     | 2.492867 | 5.618521 | 1.864741 | 0.063702 | 0.13072  | -5.02816 |
| ARID4B    | -0.31922 | 6.325866 | -1.86472 | 0.063704 | 0.13072  | -5.40397 |
| ZNF32     | -0.36681 | 4.400367 | -1.86446 | 0.063741 | 0.130758 | -5.28211 |
| CRIM1     | -0.43311 | 6.403724 | -1.86452 | 0.063733 | 0.130758 | -5.40415 |
| CXCL5     | 2.791927 | 2.076304 | 1.864346 | 0.063757 | 0.130772 | -4.42486 |
| TOP1      | 0.315222 | 7.437529 | 1.863885 | 0.063822 | 0.130886 | -5.40071 |
| NECAP2    | 0.254931 | 5.546864 | 1.863459 | 0.063883 | 0.13099  | -5.34699 |
| VPS18     | -0.30262 | 5.111293 | -1.86305 | 0.063941 | 0.13109  | -5.3532  |
| KIAA1632  | -0.36357 | 5.463367 | -1.8626  | 0.064005 | 0.131202 | -5.3832  |
| EEFSEC    | 0.347608 | 4.801844 | 1.862351 | 0.064039 | 0.131254 | -5.25564 |
| NLGN4Y    | 2.01488  | 0.920222 | 1.862105 | 0.064074 | 0.131287 | -4.41958 |
| AGAP4     | -0.38593 | 3.001895 | -1.86213 | 0.06407  | 0.131287 | -5.03041 |
| NDUFB7    | -0.32902 | 5.413006 | -1.86196 | 0.064094 | 0.131308 | -5.37945 |
| C1orf109  | 0.317236 | 4.177755 | 1.861772 | 0.064121 | 0.131326 | -5.15197 |
| SAFB      | 0.2046   | 6.102852 | 1.861781 | 0.06412  | 0.131326 | -5.3917  |
| NPR2      | -0.67468 | 2.645354 | -1.86167 | 0.064136 | 0.131336 | -5.01146 |
| GLMN      | 0.385574 | 2.845369 | 1.860452 | 0.064309 | 0.13166  | -4.86239 |
| BFAR      | 0.274004 | 5.701898 | 1.860421 | 0.064313 | 0.13166  | -5.36423 |
| PCBP1     | 0.212334 | 8.468731 | 1.860112 | 0.064357 | 0.131731 | -5.37984 |
| NSFL1C    | 0.288727 | 6.238832 | 1.859246 | 0.06448  | 0.131964 | -5.39898 |
| ZNF586    | -0.36831 | 3.286314 | -1.85886 | 0.064535 | 0.132057 | -5.09538 |
| HRAS      | 0.531099 | 4.686555 | 1.858609 | 0.064571 | 0.132111 | -5.21931 |
| LUC7L     | -0.30433 | 4.451369 | -1.85748 | 0.064733 | 0.132418 | -5.29397 |
| PCGF3     | -0.30499 | 5.920955 | -1.85743 | 0.06474  | 0.132418 | -5.41    |
| MRFAP1L1  | -0.27501 | 5.178654 | -1.85733 | 0.064754 | 0.132428 | -5.3674  |
| NRBP1     | 0.296173 | 6.720004 | 1.857197 | 0.064773 | 0.132429 | -5.41609 |
| DDX46     | -0.19881 | 6.612153 | -1.85719 | 0.064774 | 0.132429 | -5.4177  |
| FGGY      | -0.45954 | 1.948415 | -1.85638 | 0.06489  | 0.132647 | -4.84117 |
| SUSD3     | 0.837008 | 1.119747 | 1.856228 | 0.064911 | 0.132671 | -4.53981 |
| PKIA      | -0.80798 | 1.160557 | -1.8558  | 0.064973 | 0.132777 | -4.76527 |
| ALAS1     | -0.38331 | 5.78654  | -1.85524 | 0.065052 | 0.13292  | -5.41174 |
| GBAP1     | 0.564905 | 2.388595 | 1.855063 | 0.065078 | 0.132954 | -4.76454 |
| RPGR      | -0.38539 | 3.503199 | -1.85441 | 0.065173 | 0.133127 | -5.1529  |
| 7-Sep     | 0.277579 | 7.051687 | 1.854029 | 0.065227 | 0.133218 | -5.42324 |
| UBE2N     | 0.247781 | 6.337965 | 1.853242 | 0.06534  | 0.13343  | -5.41519 |
| RMI1      | 0.390333 | 4.50716  | 1.853099 | 0.06536  | 0.133453 | -5.21769 |

|          |          |          |          |          |          |          |
|----------|----------|----------|----------|----------|----------|----------|
| CHCHD2   | 0.363619 | 7.134844 | 1.851467 | 0.065596 | 0.133914 | -5.4278  |
| FKBP10   | 1.075657 | 5.615289 | 1.850539 | 0.06573  | 0.134168 | -5.29667 |
| TPBG     | 0.71831  | 5.717532 | 1.849593 | 0.065867 | 0.134428 | -5.34916 |
| MRPS2    | 0.359669 | 5.476811 | 1.849373 | 0.065899 | 0.134474 | -5.3571  |
| C6orf168 | -1.03467 | 1.629972 | -1.84918 | 0.065927 | 0.134503 | -4.8972  |
| SAP130   | 0.247047 | 5.768976 | 1.848971 | 0.065957 | 0.134503 | -5.3924  |
| PDXK     | -0.43452 | 7.078138 | -1.84894 | 0.065962 | 0.134503 | -5.42199 |
| NR1H2    | -0.30244 | 6.008794 | -1.84905 | 0.065946 | 0.134503 | -5.42753 |
| ARGLU1   | -0.4344  | 6.375752 | -1.84913 | 0.065934 | 0.134503 | -5.43232 |
| CRIP2    | -0.61574 | 5.633371 | -1.8485  | 0.066026 | 0.134615 | -5.42548 |
| PROM1    | -1.72007 | 2.73666  | -1.84667 | 0.066292 | 0.135138 | -5.23348 |
| ETF1     | -0.2599  | 7.005252 | -1.84655 | 0.066309 | 0.135152 | -5.4309  |
| YAP1     | -0.40555 | 7.308238 | -1.84621 | 0.066359 | 0.135234 | -5.42246 |
| LCP2     | 0.785561 | 3.669116 | 1.845214 | 0.066504 | 0.135511 | -4.98152 |
| C19orf66 | 0.411087 | 4.764658 | 1.845013 | 0.066534 | 0.135551 | -5.27294 |
| ZNF557   | -0.3197  | 3.145673 | -1.84483 | 0.06656  | 0.135575 | -5.0815  |
| S100A9   | 2.011192 | 7.670741 | 1.844798 | 0.066565 | 0.135575 | -5.41557 |
| GCLM     | 0.856496 | 5.166737 | 1.844404 | 0.066623 | 0.135653 | -5.27528 |
| ZDHHC17  | -0.31193 | 4.564905 | -1.84446 | 0.066615 | 0.135653 | -5.33261 |
| NDUFAF2  | -0.33197 | 2.64229  | -1.84424 | 0.066647 | 0.135682 | -4.9773  |
| TSHZ3    | -0.6839  | 3.375981 | -1.84345 | 0.066763 | 0.135899 | -5.20517 |
| WASF1    | 0.908831 | 3.569218 | 1.843341 | 0.066778 | 0.135911 | -4.94651 |
| MSC      | 1.250645 | 3.155634 | 1.843019 | 0.066825 | 0.135987 | -4.81365 |
| TNFAIP6  | 1.147387 | 2.161525 | 1.842941 | 0.066837 | 0.13599  | -4.6714  |
| TMEM67   | 0.522039 | 3.443709 | 1.842645 | 0.06688  | 0.136059 | -4.9873  |
| CD164    | -0.38605 | 8.570124 | -1.84249 | 0.066903 | 0.136085 | -5.39    |
| BAZ1B    | 0.256154 | 7.16884  | 1.841756 | 0.067011 | 0.136285 | -5.44423 |
| ALDH3A2  | -0.53725 | 6.713791 | -1.84162 | 0.067031 | 0.136306 | -5.44053 |
| PIGX     | 0.525982 | 5.312689 | 1.841188 | 0.067095 | 0.136415 | -5.33828 |
| ATP5S    | -0.27794 | 2.482755 | -1.84026 | 0.067232 | 0.136652 | -4.94126 |
| TOX3     | -1.81685 | 1.30434  | -1.8402  | 0.067241 | 0.136652 | -4.96056 |
| MTA1     | 0.30967  | 6.392312 | 1.840242 | 0.067234 | 0.136652 | -5.43865 |
| FMNL2    | 0.489584 | 6.063425 | 1.840069 | 0.067259 | 0.136671 | -5.41357 |
| ZNF526   | 0.260493 | 4.32349  | 1.839922 | 0.067281 | 0.136695 | -5.22998 |
| ZNF599   | -0.52485 | 1.572019 | -1.83945 | 0.067351 | 0.136818 | -4.81806 |
| ZNF223   | -0.58259 | 1.356351 | -1.83898 | 0.06742  | 0.136937 | -4.79117 |
| ZNF593   | 0.44536  | 3.998092 | 1.838359 | 0.067512 | 0.137104 | -5.12993 |
| EIF4A2   | -0.32643 | 8.387015 | -1.83821 | 0.067534 | 0.137129 | -5.40604 |
| SLC47A1  | 1.451403 | 0.789211 | 1.837806 | 0.067594 | 0.137231 | -4.46567 |
| TMCC1    | 0.36749  | 5.262522 | 1.837701 | 0.067609 | 0.137242 | -5.35538 |
| LRP3     | -0.7514  | 4.889624 | -1.83748 | 0.067642 | 0.137288 | -5.41346 |
| RASL11A  | -0.80349 | 1.932169 | -1.83718 | 0.067687 | 0.137359 | -4.93368 |
| AIF1     | 0.829761 | 2.783867 | 1.836887 | 0.06773  | 0.137427 | -4.82557 |
| ZBP1     | 1.358235 | 0.782085 | 1.836532 | 0.067783 | 0.137494 | -4.47336 |
| HTRA2    | 0.273059 | 4.398058 | 1.836563 | 0.067778 | 0.137494 | -5.24843 |
| RAB38    | 1.780502 | 3.448542 | 1.836028 | 0.067857 | 0.137606 | -4.79579 |
| SUCLG1   | -0.30992 | 5.859636 | -1.83609 | 0.067849 | 0.137606 | -5.44683 |
| COL21A1  | -0.98664 | 0.263118 | -1.83595 | 0.067869 | 0.137609 | -4.68213 |
| RFNG     | -0.27886 | 5.175441 | -1.83583 | 0.067886 | 0.137624 | -5.40609 |
| INPPL1   | -0.40363 | 6.842391 | -1.83575 | 0.067899 | 0.13763  | -5.45101 |
| KEAP1    | 0.346787 | 6.234008 | 1.835072 | 0.068    | 0.137814 | -5.44027 |
| FBXO22   | 0.269002 | 4.202806 | 1.834577 | 0.068073 | 0.137944 | -5.21408 |
| RPUSD4   | -0.36292 | 4.217503 | -1.83398 | 0.068162 | 0.138104 | -5.31247 |
| RNF24    | 0.506961 | 4.620677 | 1.833743 | 0.068198 | 0.138155 | -5.25705 |
| CTAGE4   | 0.899979 | 2.473796 | 1.833496 | 0.068234 | 0.13819  | -4.76688 |
| DYNLRB1  | 0.315913 | 6.786974 | 1.833551 | 0.068226 | 0.13819  | -5.45952 |
| MDGA1    | -0.94544 | 2.800016 | -1.83328 | 0.068267 | 0.138235 | -5.15412 |
| DOHH     | 0.328317 | 4.01475  | 1.833174 | 0.068283 | 0.138247 | -5.16708 |

|           |          |          |          |          |          |          |
|-----------|----------|----------|----------|----------|----------|----------|
| CBWD2     | 0.283184 | 4.62927  | 1.832671 | 0.068358 | 0.138379 | -5.29258 |
| KIAA0754  | -0.65636 | 3.901153 | -1.83208 | 0.068446 | 0.138538 | -5.30709 |
| IPO13     | -0.30337 | 5.728179 | -1.83155 | 0.068526 | 0.13868  | -5.44989 |
| MTA3      | -0.26666 | 5.148676 | -1.83024 | 0.068723 | 0.139058 | -5.41322 |
| LRRC1     | 0.401103 | 5.4938   | 1.82998  | 0.068761 | 0.139115 | -5.38982 |
| TSPAN8    | -2.21971 | 3.552367 | -1.82988 | 0.068776 | 0.139126 | -5.40673 |
| LAT2      | 0.721553 | 2.141728 | 1.828919 | 0.06892  | 0.139346 | -4.75106 |
| LHX6      | -0.68553 | 1.532095 | -1.82889 | 0.068925 | 0.139346 | -4.85654 |
| ILVBL     | -0.36433 | 5.515862 | -1.82905 | 0.068901 | 0.139346 | -5.44666 |
| PDLIM1    | 0.426319 | 7.9015   | 1.828968 | 0.068913 | 0.139346 | -5.45671 |
| SYT12     | 1.384145 | 1.352683 | 1.828581 | 0.068971 | 0.139419 | -4.55371 |
| CAMK2G    | -0.3308  | 5.562759 | -1.82847 | 0.068987 | 0.139432 | -5.44891 |
| CHPF      | 0.373215 | 7.747273 | 1.828358 | 0.069005 | 0.139447 | -5.46011 |
| MGMT      | -0.66372 | 3.022424 | -1.82726 | 0.069171 | 0.139763 | -5.153   |
| FKRP      | -0.27265 | 3.885885 | -1.82615 | 0.069338 | 0.140079 | -5.26291 |
| ADPRHL1   | -0.61502 | 1.792328 | -1.82593 | 0.069372 | 0.140107 | -4.88875 |
| DPH1      | -0.26934 | 4.724525 | -1.82595 | 0.069368 | 0.140107 | -5.37938 |
| ERO1L     | 0.55855  | 7.241462 | 1.82581  | 0.06939  | 0.140123 | -5.47427 |
| TMEM30A   | -0.26962 | 7.598395 | -1.82559 | 0.069422 | 0.140169 | -5.45541 |
| ZNF815    | 0.509297 | 0.518291 | 1.825474 | 0.06944  | 0.140185 | -4.55207 |
| PDE10A    | -0.71887 | 2.256902 | -1.82515 | 0.069489 | 0.140263 | -4.99799 |
| GRTP1     | 0.604673 | 3.591571 | 1.824766 | 0.069548 | 0.140361 | -5.03279 |
| GJC2      | -0.58401 | 0.387535 | -1.82457 | 0.069578 | 0.140382 | -4.66755 |
| ZSCAN12   | -0.54006 | 2.691708 | -1.82461 | 0.069571 | 0.140382 | -5.06222 |
| RNFT1     | 0.427448 | 3.864757 | 1.824068 | 0.069654 | 0.140513 | -5.12907 |
| SHPK      | -0.27925 | 4.622263 | -1.824   | 0.069663 | 0.140513 | -5.37184 |
| CHAC2     | 0.490828 | 2.245815 | 1.823842 | 0.069688 | 0.140543 | -4.80754 |
| PUS10     | 0.393469 | 3.271947 | 1.823612 | 0.069723 | 0.140593 | -5.01042 |
| GRHL3     | 2.721652 | 3.471293 | 1.823441 | 0.069749 | 0.14062  | -4.68733 |
| PEAR1     | -0.57085 | 3.041076 | -1.82339 | 0.069756 | 0.14062  | -5.14304 |
| AGPHD1    | -0.43783 | 1.232133 | -1.82283 | 0.069842 | 0.140772 | -4.77839 |
| PABPC4    | -0.39462 | 7.515014 | -1.82247 | 0.069896 | 0.14086  | -5.46023 |
| FAS       | 0.586277 | 4.00299  | 1.822016 | 0.069966 | 0.140981 | -5.13435 |
| CAMK1     | -0.42674 | 2.739306 | -1.82188 | 0.069986 | 0.141001 | -5.05547 |
| RCAN3     | -0.33878 | 3.857316 | -1.82176 | 0.070005 | 0.141005 | -5.27459 |
| RANBP2    | -0.28501 | 7.65123  | -1.82174 | 0.070008 | 0.141005 | -5.46052 |
| VAMP8     | 0.401652 | 6.193437 | 1.820716 | 0.070164 | 0.141299 | -5.46128 |
| PLXDC1    | 0.653155 | 3.899221 | 1.820105 | 0.070257 | 0.141426 | -5.10124 |
| ZBTB34    | -0.29225 | 4.359059 | -1.82018 | 0.070246 | 0.141426 | -5.34821 |
| CRK       | -0.2025  | 5.976124 | -1.82014 | 0.070252 | 0.141426 | -5.47627 |
| FZD10     | 2.113645 | 3.187521 | 1.819923 | 0.070285 | 0.141461 | -4.73472 |
| SLC48A1   | -0.41985 | 4.778545 | -1.81915 | 0.070404 | 0.14168  | -5.41131 |
| EPB41L4B  | -0.74382 | 4.990605 | -1.81824 | 0.070543 | 0.14194  | -5.45323 |
| ZNF782    | -0.34385 | 1.896928 | -1.81784 | 0.070604 | 0.142041 | -4.88242 |
| CMYA5     | -0.7692  | 1.802691 | -1.81722 | 0.0707   | 0.142213 | -4.93855 |
| ACN9      | 0.669616 | 3.67019  | 1.817156 | 0.070709 | 0.142213 | -5.05455 |
| KIDINS220 | -0.26639 | 6.757024 | -1.81707 | 0.070722 | 0.142218 | -5.48794 |
| HDAC10    | 0.346001 | 4.640609 | 1.816986 | 0.070736 | 0.142224 | -5.31215 |
| SLC15A1   | 1.952987 | 1.158453 | 1.815524 | 0.070961 | 0.142657 | -4.50077 |
| BLVRB     | -0.47285 | 5.706056 | -1.81523 | 0.071007 | 0.142728 | -5.48371 |
| PFN2      | 0.951176 | 6.356495 | 1.814862 | 0.071063 | 0.142821 | -5.44924 |
| TCERG1    | 0.220669 | 6.119104 | 1.814508 | 0.071117 | 0.14291  | -5.47702 |
| IFT27     | -0.44597 | 3.679373 | -1.81346 | 0.071279 | 0.143215 | -5.27331 |
| MGAT5     | -0.53447 | 4.235084 | -1.81322 | 0.071316 | 0.143248 | -5.37074 |
| LRSAM1    | -0.27692 | 4.654045 | -1.81324 | 0.071313 | 0.143248 | -5.39492 |
| PCDH19    | -1.22121 | 1.251116 | -1.81279 | 0.071383 | 0.143353 | -4.91674 |
| UBN2      | -0.29005 | 5.544932 | -1.81275 | 0.071389 | 0.143353 | -5.47403 |
| RHBDF1    | 0.409046 | 5.198556 | 1.812457 | 0.071435 | 0.143424 | -5.38878 |

|           |          |          |          |          |          |          |
|-----------|----------|----------|----------|----------|----------|----------|
| JMJD4     | 0.343326 | 4.123034 | 1.812068 | 0.071495 | 0.143524 | -5.22443 |
| DPP7      | -0.40417 | 5.756242 | -1.812   | 0.071506 | 0.143525 | -5.48922 |
| SCAND3    | -1.31295 | -0.09164 | -1.81124 | 0.071624 | 0.143741 | -4.71478 |
| SEC61A2   | 0.409007 | 2.7788   | 1.810542 | 0.071732 | 0.143938 | -4.93392 |
| C14orf156 | 0.361267 | 4.684889 | 1.80958  | 0.071882 | 0.144218 | -5.33128 |
| PPP2R5C   | -0.24752 | 6.757101 | -1.80929 | 0.071927 | 0.144288 | -5.50204 |
| CYP2W1    | 2.112853 | 0.654846 | 1.808879 | 0.071991 | 0.144385 | -4.50961 |
| ARHGAP1   | -0.2803  | 7.562413 | -1.80885 | 0.071996 | 0.144385 | -5.486   |
| FAM38B    | -0.81891 | 1.406847 | -1.80868 | 0.072021 | 0.144415 | -4.88781 |
| PNPO      | 0.344068 | 5.585953 | 1.808499 | 0.07205  | 0.14444  | -5.4421  |
| PFKM      | -0.43811 | 5.385908 | -1.80844 | 0.07206  | 0.14444  | -5.4802  |
| PELI1     | 0.451936 | 6.363129 | 1.808405 | 0.072065 | 0.14444  | -5.48942 |
| LOC654342 | -0.58212 | 3.279621 | -1.8082  | 0.072097 | 0.144484 | -5.22644 |
| HSF4      | -0.52436 | 2.446146 | -1.80755 | 0.072198 | 0.144666 | -5.03509 |
| FAM127C   | -0.66727 | 3.359487 | -1.80705 | 0.072277 | 0.144804 | -5.26613 |
| ARL15     | -0.40079 | 3.457647 | -1.80665 | 0.07234  | 0.144908 | -5.23258 |
| SRD5A3    | 0.515583 | 5.110932 | 1.806311 | 0.072393 | 0.144993 | -5.3763  |
| DYX1C1    | 0.884247 | 0.76962  | 1.805425 | 0.072532 | 0.145233 | -4.5761  |
| C10orf58  | 0.605708 | 5.970832 | 1.805413 | 0.072534 | 0.145233 | -5.46106 |
| PSPC1     | 0.319793 | 4.921737 | 1.804883 | 0.072617 | 0.145379 | -5.37829 |
| KIAA0240  | -0.37656 | 5.392076 | -1.80437 | 0.072697 | 0.145518 | -5.48435 |
| SCIN      | -0.97836 | 2.578601 | -1.8043  | 0.072708 | 0.14552  | -5.1517  |
| DYNLT1    | 0.314864 | 5.685077 | 1.803722 | 0.072799 | 0.145682 | -5.46201 |
| PLEKHA9   | 0.325955 | 1.955976 | 1.803535 | 0.072829 | 0.14572  | -4.82054 |
| INTU      | -0.49041 | 2.163789 | -1.8033  | 0.072866 | 0.145774 | -4.98193 |
| CXCL13    | 1.946383 | 2.339445 | 1.803129 | 0.072893 | 0.145806 | -4.66096 |
| LIN54     | 0.282617 | 4.841238 | 1.80297  | 0.072918 | 0.145836 | -5.37554 |
| KLRG2     | 1.983529 | -0.18748 | 1.802791 | 0.072946 | 0.145871 | -4.51546 |
| C20orf43  | 0.223818 | 6.198988 | 1.802667 | 0.072966 | 0.145889 | -5.50147 |
| SERHL     | -0.32405 | 1.680564 | -1.80226 | 0.07303  | 0.145997 | -4.87193 |
| GTF3C1    | -0.29551 | 7.220322 | -1.80132 | 0.073179 | 0.146252 | -5.507   |
| COPZ1     | 0.245508 | 7.10341  | 1.801327 | 0.073177 | 0.146252 | -5.51722 |
| LAG3      | 1.033159 | 1.801846 | 1.800836 | 0.073255 | 0.146384 | -4.70617 |
| TMEM39A   | 0.317098 | 4.918917 | 1.800653 | 0.073284 | 0.146421 | -5.38505 |
| CCDC7     | -0.32531 | 1.209814 | -1.80055 | 0.073299 | 0.146431 | -4.79748 |
| HSPA12B   | -0.53023 | 2.003509 | -1.80032 | 0.073337 | 0.146484 | -4.96266 |
| UBE2V2    | 0.313418 | 5.299774 | 1.800255 | 0.073347 | 0.146484 | -5.43135 |
| DNAJB14   | -0.28467 | 4.253908 | -1.79972 | 0.073432 | 0.146633 | -5.36945 |
| ZNF264    | -0.41008 | 5.685834 | -1.79957 | 0.073456 | 0.14666  | -5.50895 |
| SMAD1     | 0.359446 | 5.066016 | 1.799362 | 0.073489 | 0.146704 | -5.40141 |
| B3GALT4   | -0.43048 | 3.087329 | -1.79925 | 0.073506 | 0.146718 | -5.1707  |
| CBWD6     | 0.506843 | 3.292008 | 1.799059 | 0.073537 | 0.146758 | -5.03566 |
| MTX2      | 0.257425 | 4.685358 | 1.798707 | 0.073592 | 0.146849 | -5.36464 |
| AGPAT5    | 0.475161 | 5.564224 | 1.79815  | 0.073681 | 0.147004 | -5.44698 |
| JMJD8     | -0.29415 | 5.879001 | -1.79783 | 0.073731 | 0.147084 | -5.51532 |
| UBE2Q2P1  | -0.472   | 0.606188 | -1.79706 | 0.073854 | 0.147296 | -4.73145 |
| C14orf4   | -0.45761 | 6.300458 | -1.79703 | 0.073859 | 0.147296 | -5.52574 |
| LRRC29    | -0.48378 | 0.55854  | -1.79632 | 0.073973 | 0.147502 | -4.72825 |
| CDC42EP1  | -0.51902 | 7.602793 | -1.79588 | 0.074043 | 0.147622 | -5.50171 |
| MATN3     | 0.974215 | 1.100184 | 1.795808 | 0.074054 | 0.147622 | -4.62521 |
| ATP6V1E2  | 0.544972 | 1.31268  | 1.795668 | 0.074077 | 0.147625 | -4.70587 |
| KIAA1244  | -1.15034 | 4.290162 | -1.79567 | 0.074076 | 0.147625 | -5.46404 |
| WDR45     | -0.30119 | 4.936691 | -1.79525 | 0.074144 | 0.147738 | -5.45876 |
| CXCL3     | 1.955213 | 2.330186 | 1.795037 | 0.074177 | 0.147783 | -4.66807 |
| KLF10     | -0.45507 | 6.770587 | -1.79473 | 0.074227 | 0.147862 | -5.52459 |
| SETD1B    | -0.23941 | 6.406548 | -1.79431 | 0.074294 | 0.147975 | -5.53056 |
| APPL2     | -0.32759 | 5.734486 | -1.79372 | 0.074389 | 0.148142 | -5.51832 |
| GDAP1     | 0.743512 | 3.43461  | 1.793565 | 0.074413 | 0.148169 | -5.03445 |

|          |          |          |          |          |          |          |
|----------|----------|----------|----------|----------|----------|----------|
| LMLN     | 0.48106  | 4.276154 | 1.793342 | 0.074449 | 0.148198 | -5.26276 |
| WDR91    | -0.5147  | 4.222113 | -1.79336 | 0.074445 | 0.148198 | -5.40327 |
| CCNH     | -0.25622 | 4.408573 | -1.7919  | 0.074681 | 0.148638 | -5.40058 |
| AKNA     | -0.49234 | 5.327364 | -1.79173 | 0.074707 | 0.14867  | -5.50875 |
| SC4MOL   | 0.532497 | 6.058586 | 1.790775 | 0.074861 | 0.148955 | -5.49857 |
| SPTBN1   | -0.56077 | 9.231607 | -1.79057 | 0.074894 | 0.148999 | -5.45472 |
| CCNB1IP1 | 0.390825 | 4.886515 | 1.790399 | 0.074922 | 0.149034 | -5.39099 |
| REEP6    | 1.06078  | 3.698417 | 1.790081 | 0.074973 | 0.149114 | -5.03112 |
| TOP1P1   | 0.323309 | 2.78822  | 1.789903 | 0.075002 | 0.14915  | -4.98455 |
| ZNF35    | -0.27817 | 3.127489 | -1.78964 | 0.075045 | 0.149214 | -5.16844 |
| CD93     | -0.63949 | 5.800782 | -1.78908 | 0.075134 | 0.14937  | -5.53622 |
| NHP2L1   | 0.258609 | 6.346397 | 1.788847 | 0.075173 | 0.149425 | -5.53027 |
| CS       | -0.24381 | 7.881714 | -1.78816 | 0.075283 | 0.14961  | -5.51443 |
| DCTN1    | -0.23588 | 7.794895 | -1.78814 | 0.075287 | 0.14961  | -5.51726 |
| OLFM2    | 1.29651  | 3.402848 | 1.787816 | 0.075339 | 0.149693 | -4.94653 |
| ZFP14    | -0.46457 | 2.632226 | -1.7877  | 0.075358 | 0.149709 | -5.10034 |
| L3MBTL3  | 0.419618 | 3.274911 | 1.7874   | 0.075407 | 0.149785 | -5.07036 |
| LACE1    | -0.35592 | 1.15508  | -1.78722 | 0.075435 | 0.149804 | -4.81644 |
| ATP6V1F  | 0.368374 | 5.914743 | 1.787206 | 0.075438 | 0.149804 | -5.50532 |
| TMEM40   | 2.884496 | 1.17346  | 1.787029 | 0.075467 | 0.14984  | -4.54883 |
| BTN3A1   | 0.567331 | 4.78314  | 1.786758 | 0.075511 | 0.149906 | -5.35548 |
| PHAX     | -0.22367 | 4.135018 | -1.7865  | 0.075553 | 0.14995  | -5.36808 |
| SLC25A10 | 0.518182 | 5.213307 | 1.78649  | 0.075555 | 0.14995  | -5.4235  |
| TUBGCP2  | -0.25451 | 6.144043 | -1.78633 | 0.07558  | 0.14998  | -5.54154 |
| GPR137   | -0.28655 | 4.387513 | -1.786   | 0.075635 | 0.150067 | -5.41196 |
| C10orf78 | 0.473869 | 3.09806  | 1.785907 | 0.075649 | 0.150074 | -5.02489 |
| FAT1     | 0.586493 | 8.700445 | 1.78527  | 0.075753 | 0.150258 | -5.51682 |
| CARD11   | 1.689958 | 3.759178 | 1.78498  | 0.0758   | 0.150297 | -4.94744 |
| MAPKAPK5 | 0.23256  | 4.724817 | 1.784952 | 0.075804 | 0.150297 | -5.3971  |
| CIAPIN1  | 0.26688  | 5.243686 | 1.784998 | 0.075797 | 0.150297 | -5.45657 |
| ZDHHC2   | -0.85595 | 4.56999  | -1.78483 | 0.075825 | 0.150315 | -5.48789 |
| PI4KAP2  | -0.47982 | 3.339935 | -1.78452 | 0.075874 | 0.150374 | -5.26009 |
| SERPINF1 | -0.71244 | 5.191398 | -1.78451 | 0.075876 | 0.150374 | -5.52477 |
| RBMXL1   | -0.2353  | 5.299609 | -1.78411 | 0.075942 | 0.150483 | -5.50534 |
| SMCR8    | -0.2917  | 5.939737 | -1.78396 | 0.075966 | 0.15051  | -5.54156 |
| PHACTR1  | -0.66788 | 0.117983 | -1.78268 | 0.076175 | 0.150857 | -4.7107  |
| GMCL1    | 0.361496 | 4.541387 | 1.782748 | 0.076164 | 0.150857 | -5.35483 |
| TOR1AIP2 | -0.30699 | 5.433644 | -1.78262 | 0.076184 | 0.150857 | -5.52147 |
| DDAH1    | -1.01942 | 5.435656 | -1.78273 | 0.076166 | 0.150857 | -5.54564 |
| MRPL24   | 0.377792 | 5.244116 | 1.78187  | 0.076308 | 0.15108  | -5.4507  |
| GPR3     | 0.79768  | 1.052963 | 1.781545 | 0.076361 | 0.151101 | -4.66381 |
| E2F6     | 0.287426 | 3.975667 | 1.781634 | 0.076346 | 0.151101 | -5.25758 |
| DRG1     | 0.278762 | 5.381901 | 1.781541 | 0.076361 | 0.151101 | -5.47588 |
| KIAA1949 | 0.537447 | 6.041783 | 1.781557 | 0.076359 | 0.151101 | -5.51348 |
| C1orf84  | 0.409153 | 1.098555 | 1.781406 | 0.076383 | 0.151123 | -4.71678 |
| SSX2IP   | 0.39739  | 5.038493 | 1.781188 | 0.076419 | 0.151172 | -5.42581 |
| C3       | -1.17286 | 7.502833 | -1.78111 | 0.076432 | 0.151177 | -5.5118  |
| ATF3     | -0.73411 | 5.291496 | -1.78076 | 0.076489 | 0.151268 | -5.53694 |
| C5orf42  | -0.65661 | 4.1656   | -1.78067 | 0.076503 | 0.151274 | -5.43447 |
| C19orf60 | 0.334072 | 4.219955 | 1.780509 | 0.076531 | 0.151295 | -5.30141 |
| KDEL2    | 0.344241 | 8.337032 | 1.78048  | 0.076535 | 0.151295 | -5.52978 |
| RGS3     | -0.42069 | 5.173408 | -1.78025 | 0.076573 | 0.151348 | -5.51438 |
| ZNF462   | 0.646442 | 4.942906 | 1.780079 | 0.076601 | 0.15136  | -5.38479 |
| GNAI1    | -0.75341 | 4.842277 | -1.78014 | 0.07659  | 0.15136  | -5.5117  |
| BCL2L15  | -1.49587 | 1.578055 | -1.77968 | 0.076667 | 0.15147  | -5.06954 |
| PCSK6    | -0.61171 | 4.494992 | -1.77897 | 0.076783 | 0.151676 | -5.46978 |
| SLC39A3  | 0.299197 | 4.563146 | 1.778554 | 0.076852 | 0.151791 | -5.37525 |
| ZNF100   | -0.59072 | 2.951934 | -1.77825 | 0.076901 | 0.151868 | -5.20915 |

|           |          |          |          |          |          |          |
|-----------|----------|----------|----------|----------|----------|----------|
| SSSCA1    | 0.430568 | 3.920507 | 1.77782  | 0.076973 | 0.151987 | -5.22396 |
| PPM1F     | -0.31728 | 5.168248 | -1.77773 | 0.076988 | 0.151996 | -5.5117  |
| LOC400759 | 1.198525 | 0.38248  | 1.777229 | 0.07707  | 0.152123 | -4.56102 |
| GPBP1     | -0.21692 | 6.253685 | -1.7772  | 0.077074 | 0.152123 | -5.55889 |
| ZNF833    | 0.532157 | 0.30016  | 1.777043 | 0.077101 | 0.152154 | -4.60528 |
| NOL7      | 0.309362 | 4.927601 | 1.776883 | 0.077127 | 0.152185 | -5.42908 |
| ZNF222    | -0.4498  | 0.333293 | -1.77643 | 0.077203 | 0.152297 | -4.725   |
| ZNF688    | -0.32478 | 3.051991 | -1.77636 | 0.077214 | 0.152297 | -5.18227 |
| DPYSL3    | -0.89122 | 6.540606 | -1.77634 | 0.077217 | 0.152297 | -5.55357 |
| SESN2     | -0.42223 | 4.398534 | -1.77559 | 0.077341 | 0.15252  | -5.44564 |
| FTSJ3     | 0.274007 | 5.775701 | 1.775432 | 0.077367 | 0.152551 | -5.52196 |
| B4GALNT1  | 1.747178 | 2.163889 | 1.77506  | 0.077429 | 0.15265  | -4.70975 |
| KLHL7     | 0.334038 | 4.96502  | 1.774591 | 0.077506 | 0.152782 | -5.43547 |
| C1orf55   | 0.266811 | 5.260148 | 1.774501 | 0.077521 | 0.15279  | -5.47677 |
| RSAD2     | 1.168031 | 3.881079 | 1.774146 | 0.07758  | 0.152885 | -5.07657 |
| PCDHB5    | -0.9407  | 0.469318 | -1.77403 | 0.0776   | 0.152902 | -4.8158  |
| C16orf68  | -0.24741 | 3.217464 | -1.77381 | 0.077637 | 0.152952 | -5.20949 |
| RAB22A    | 0.269339 | 6.442422 | 1.773689 | 0.077656 | 0.152969 | -5.55956 |
| KIAA1755  | -0.79001 | 1.81989  | -1.77359 | 0.077673 | 0.152982 | -5.01891 |
| RHPN1     | 0.896057 | 3.190891 | 1.773081 | 0.077757 | 0.153121 | -4.99367 |
| TSHZ1     | -0.35275 | 5.05561  | -1.77303 | 0.077766 | 0.153121 | -5.51318 |
| CCL11     | -0.86269 | 1.349059 | -1.77294 | 0.077781 | 0.153129 | -4.94501 |
| HSPB1     | 0.900314 | 9.712229 | 1.772817 | 0.077801 | 0.153147 | -5.51384 |
| PRPSAP2   | 0.338881 | 4.584349 | 1.772751 | 0.077812 | 0.153147 | -5.3832  |
| ZNF250    | -0.33053 | 3.305588 | -1.77134 | 0.078047 | 0.153559 | -5.24974 |
| SEN3      | 0.294396 | 5.401862 | 1.771408 | 0.078036 | 0.153559 | -5.49421 |
| PSMD5     | 0.254758 | 5.984719 | 1.771294 | 0.078055 | 0.153559 | -5.54436 |
| LAIR1     | 0.837673 | 3.190492 | 1.770421 | 0.0782   | 0.153824 | -5.01046 |
| TMC8      | 0.758018 | 3.854377 | 1.770295 | 0.078221 | 0.153844 | -5.15774 |
| C1orf74   | 0.74155  | 2.591557 | 1.769805 | 0.078303 | 0.153984 | -4.91999 |
| CPSF4     | 0.420975 | 4.317066 | 1.769632 | 0.078332 | 0.154019 | -5.3237  |
| TADA3     | -0.26277 | 6.01654  | -1.76951 | 0.078353 | 0.154037 | -5.56818 |
| HUNK      | -0.80749 | 1.451504 | -1.7691  | 0.078421 | 0.15415  | -4.96254 |
| TRPM4     | -0.50345 | 5.853166 | -1.76878 | 0.078475 | 0.154235 | -5.57043 |
| PILRB     | 0.444712 | 5.357151 | 1.768642 | 0.078498 | 0.154258 | -5.47939 |
| GRAMD1B   | -1.16222 | 1.258527 | -1.76825 | 0.078563 | 0.154365 | -4.97604 |
| SLC25A15  | 0.469139 | 3.923078 | 1.76813  | 0.078584 | 0.154383 | -5.23038 |
| ACTR6     | 0.315637 | 4.236293 | 1.768048 | 0.078597 | 0.154385 | -5.33091 |
| C1orf77   | 0.203561 | 6.253782 | 1.76799  | 0.078607 | 0.154385 | -5.5652  |
| C3orf62   | -0.35174 | 2.540588 | -1.76752 | 0.078686 | 0.154518 | -5.09382 |
| DZIP3     | -0.45091 | 3.744208 | -1.76733 | 0.078718 | 0.15456  | -5.36811 |
| GCH1      | 0.508778 | 4.118654 | 1.767061 | 0.078763 | 0.154626 | -5.27066 |
| CCHCR1    | 0.358172 | 4.238868 | 1.766739 | 0.078817 | 0.154711 | -5.32358 |
| CHKA      | -0.67398 | 4.650714 | -1.76631 | 0.078889 | 0.154809 | -5.51185 |
| MAP2K1    | 0.274957 | 5.920352 | 1.766375 | 0.078878 | 0.154809 | -5.54794 |
| PMS2L2    | 0.411878 | 2.008768 | 1.766224 | 0.078904 | 0.154816 | -4.88096 |
| RASSF1    | -0.35524 | 4.101848 | -1.76608 | 0.078928 | 0.154842 | -5.41518 |
| UBE2D3    | -0.22367 | 7.404051 | -1.76531 | 0.079057 | 0.155073 | -5.56746 |
| DNM2      | -0.31688 | 7.90524  | -1.76503 | 0.079105 | 0.155146 | -5.552   |
| LOC201651 | 1.498874 | 0.005046 | 1.764847 | 0.079136 | 0.155184 | -4.5796  |
| HIST2H2BE | 0.746965 | 4.661772 | 1.763533 | 0.079358 | 0.155528 | -5.34547 |
| PCGF2     | 0.467444 | 4.984035 | 1.763345 | 0.079389 | 0.155528 | -5.44126 |
| B4GALT3   | 0.281935 | 5.305966 | 1.763383 | 0.079383 | 0.155528 | -5.49888 |
| CSNK1G1   | 0.308977 | 5.453948 | 1.763468 | 0.079369 | 0.155528 | -5.51171 |
| GLUD1     | -0.28668 | 7.219497 | -1.76342 | 0.079377 | 0.155528 | -5.57355 |
| NADK      | -0.28222 | 5.951826 | -1.76363 | 0.07934  | 0.155528 | -5.57709 |
| SFRS13A   | 0.210487 | 6.436795 | 1.763369 | 0.079385 | 0.155528 | -5.57879 |
| IL12RB2   | 1.514332 | 1.490519 | 1.761005 | 0.079786 | 0.156283 | -4.67269 |

|            |          |          |          |          |          |          |
|------------|----------|----------|----------|----------|----------|----------|
| UROS       | -0.29392 | 4.116943 | -1.76068 | 0.079841 | 0.15637  | -5.41883 |
| ASNA1      | 0.274049 | 5.496606 | 1.7605   | 0.079871 | 0.156407 | -5.52411 |
| KIAA0355   | -0.31469 | 5.330451 | -1.76029 | 0.079907 | 0.156432 | -5.55405 |
| RBM47      | -0.6938  | 7.211486 | -1.76031 | 0.079904 | 0.156432 | -5.57043 |
| COQ10A     | -0.35565 | 1.804337 | -1.75901 | 0.080126 | 0.156839 | -4.97111 |
| PANX2      | 2.126964 | 2.217059 | 1.758733 | 0.080172 | 0.156875 | -4.70043 |
| C5orf28    | 0.396506 | 4.235263 | 1.758811 | 0.080159 | 0.156875 | -5.32981 |
| FAM57A     | 0.439772 | 5.427284 | 1.758701 | 0.080178 | 0.156875 | -5.50513 |
| CWF19L1    | 0.261054 | 4.314339 | 1.758354 | 0.080237 | 0.156968 | -5.37157 |
| CTAGE9     | 0.886267 | 3.77199  | 1.757851 | 0.080323 | 0.157114 | -5.13361 |
| SGCE       | -0.70225 | 2.991435 | -1.75715 | 0.080442 | 0.157326 | -5.27806 |
| UTP23      | 0.282914 | 4.678454 | 1.756519 | 0.08055  | 0.157515 | -5.43379 |
| ZCRB1      | -0.2903  | 5.523322 | -1.75645 | 0.080563 | 0.157518 | -5.57158 |
| DENND5B    | -0.73219 | 3.630403 | -1.75598 | 0.080643 | 0.157653 | -5.40939 |
| SLC20A2    | 0.588981 | 6.407214 | 1.755772 | 0.080678 | 0.157677 | -5.57766 |
| GPC1       | 0.964082 | 7.50996  | 1.755791 | 0.080675 | 0.157677 | -5.59686 |
| ATP2B4     | -0.55338 | 7.548091 | -1.7556  | 0.080708 | 0.157713 | -5.57287 |
| SS18L2     | 0.331783 | 3.635108 | 1.755513 | 0.080723 | 0.15772  | -5.21739 |
| CRAMP1L    | -0.27027 | 5.657267 | -1.75538 | 0.080745 | 0.157742 | -5.57958 |
| NCOA2      | -0.41384 | 5.55955  | -1.75523 | 0.080771 | 0.15777  | -5.58111 |
| GMFB       | 0.284079 | 6.280264 | 1.755092 | 0.080795 | 0.157795 | -5.58568 |
| CDKN2AIP   | -0.30505 | 4.547796 | -1.75501 | 0.080809 | 0.1578   | -5.48761 |
| C14orf43   | -0.3301  | 6.495991 | -1.7547  | 0.080861 | 0.15788  | -5.59944 |
| EXOSC1     | 0.2882   | 4.085281 | 1.753702 | 0.081033 | 0.158195 | -5.32752 |
| SNRNP200   | 0.244198 | 8.543885 | 1.75363  | 0.081046 | 0.158197 | -5.56721 |
| SCARF1     | -0.46752 | 2.645709 | -1.75346 | 0.081075 | 0.158209 | -5.16113 |
| DTWD2      | -0.32303 | 3.650196 | -1.75344 | 0.081079 | 0.158209 | -5.35204 |
| CARD6      | -0.60057 | 4.231543 | -1.75333 | 0.081097 | 0.158209 | -5.48232 |
| COMMD6     | -0.33677 | 5.48244  | -1.75335 | 0.081095 | 0.158209 | -5.57685 |
| MGAT3      | -0.95186 | 2.800657 | -1.75302 | 0.08115  | 0.158289 | -5.2857  |
| GADD45GIP1 | 0.35667  | 5.170373 | 1.752635 | 0.081217 | 0.158376 | -5.49554 |
| LYPLA2     | 0.322358 | 5.825326 | 1.752638 | 0.081217 | 0.158376 | -5.5617  |
| PTPN11     | -0.22485 | 7.34736  | -1.7525  | 0.08124  | 0.158399 | -5.59085 |
| GALNT3     | 0.696769 | 6.502313 | 1.752267 | 0.08128  | 0.158455 | -5.58296 |
| C17orf65   | 0.352956 | 3.095978 | 1.75205  | 0.081318 | 0.158506 | -5.10497 |
| UGT1A1     | 1.690253 | -0.32771 | 1.751297 | 0.081448 | 0.158715 | -4.60003 |
| APLN       | 1.210896 | 2.308174 | 1.751325 | 0.081443 | 0.158715 | -4.83647 |
| GNB2       | 0.328945 | 7.98012  | 1.751168 | 0.08147  | 0.158736 | -5.58985 |
| PROS1      | -0.65028 | 4.513198 | -1.75068 | 0.081554 | 0.158872 | -5.52576 |
| MYO1E      | 0.441122 | 6.730263 | 1.750634 | 0.081562 | 0.158872 | -5.60263 |
| SH3GLB1    | -0.27018 | 7.000167 | -1.75044 | 0.081595 | 0.158914 | -5.60063 |
| EMP1       | -0.86215 | 7.682208 | -1.75018 | 0.081641 | 0.158981 | -5.56901 |
| SPATA13    | -0.76067 | 4.366067 | -1.74978 | 0.081709 | 0.159092 | -5.51922 |
| NEK11      | 0.584539 | 2.33221  | 1.74971  | 0.081722 | 0.159095 | -4.93598 |
| LOC646851  | 0.767624 | 0.815214 | 1.749309 | 0.081792 | 0.159207 | -4.68993 |
| RBKS       | 0.470788 | 1.418646 | 1.748967 | 0.081851 | 0.159278 | -4.8088  |
| DEPDC7     | 0.885899 | 1.945295 | 1.748971 | 0.08185  | 0.159278 | -4.83161 |
| TMEM171    | -0.86253 | 2.432033 | -1.74889 | 0.081864 | 0.159282 | -5.18319 |
| SDCCAG1    | -0.23102 | 5.82265  | -1.74815 | 0.081993 | 0.15951  | -5.59788 |
| UBL4A      | 0.264856 | 5.733166 | 1.748011 | 0.082017 | 0.159534 | -5.56672 |
| SCOC       | -0.45319 | 5.714893 | -1.74709 | 0.082177 | 0.159825 | -5.60277 |
| DDX24      | -0.22425 | 6.985957 | -1.7466  | 0.082262 | 0.159968 | -5.60825 |
| AP1S3      | 0.692507 | 4.25138  | 1.746029 | 0.082361 | 0.160116 | -5.29463 |
| UBR5       | 0.289358 | 7.476035 | 1.746028 | 0.082362 | 0.160116 | -5.60856 |
| SCLY       | 0.399681 | 4.117918 | 1.745746 | 0.082411 | 0.16019  | -5.32702 |
| PKP1       | 3.290218 | 6.755859 | 1.745567 | 0.082442 | 0.160192 | -5.3266  |
| C9orf114   | 0.291704 | 4.710841 | 1.745574 | 0.082441 | 0.160192 | -5.45548 |
| ACAP3      | -0.39948 | 5.851548 | -1.74554 | 0.082446 | 0.160192 | -5.60833 |



|              |          |          |          |          |          |          |
|--------------|----------|----------|----------|----------|----------|----------|
| MED11        | -0.2955  | 3.064685 | -1.74546 | 0.08246  | 0.160197 | -5.2324  |
| FASTKD2      | -0.22278 | 5.721001 | -1.74533 | 0.082484 | 0.160221 | -5.59795 |
| VAPA         | -0.2578  | 7.259455 | -1.74526 | 0.082496 | 0.160222 | -5.60457 |
| RNF167       | -0.27472 | 6.247124 | -1.74507 | 0.082528 | 0.160262 | -5.61509 |
| EHD4         | 0.364589 | 6.166663 | 1.744753 | 0.082584 | 0.160337 | -5.59482 |
| BCOR         | -0.32825 | 5.958746 | -1.74472 | 0.08259  | 0.160337 | -5.61099 |
| C16orf91     | 0.364649 | 2.901821 | 1.744486 | 0.082631 | 0.160394 | -5.07848 |
| NT5C         | 0.373828 | 4.41961  | 1.743621 | 0.082782 | 0.160665 | -5.39789 |
| STARD7       | 0.282183 | 7.258194 | 1.743474 | 0.082807 | 0.160693 | -5.61646 |
| CEP164       | 0.253555 | 4.871225 | 1.743329 | 0.082833 | 0.160719 | -5.4861  |
| DGKZ         | 0.258505 | 5.323686 | 1.743138 | 0.082866 | 0.160723 | -5.53805 |
| RPL5         | -0.28456 | 8.730918 | -1.7432  | 0.082855 | 0.160723 | -5.5624  |
| GPR125       | -0.4094  | 5.139092 | -1.74312 | 0.082869 | 0.160723 | -5.57537 |
| NUP35        | 0.304059 | 3.985502 | 1.742517 | 0.082975 | 0.160896 | -5.32351 |
| FIZ1         | -0.24962 | 4.374389 | -1.74242 | 0.082992 | 0.160896 | -5.48129 |
| PTMS         | 0.472746 | 7.400938 | 1.742414 | 0.082993 | 0.160896 | -5.61857 |
| PNPLA8       | -0.28441 | 5.447965 | -1.74168 | 0.083121 | 0.161123 | -5.59211 |
| SOCS1        | 0.729347 | 3.600965 | 1.741607 | 0.083135 | 0.161126 | -5.15681 |
| TNFRSF11B    | 1.596421 | 1.631072 | 1.740432 | 0.083341 | 0.161498 | -4.71143 |
| STON2        | 1.063204 | 4.4472   | 1.740385 | 0.08335  | 0.161498 | -5.27779 |
| SLC19A1      | 0.543999 | 3.979633 | 1.739757 | 0.08346  | 0.161689 | -5.27456 |
| ALG10        | 0.408826 | 2.794938 | 1.739537 | 0.083499 | 0.161732 | -5.05721 |
| STAMBP       | 0.224543 | 5.467466 | 1.739502 | 0.083505 | 0.161732 | -5.56156 |
| TNFSF13B     | 0.860182 | 1.171974 | 1.739118 | 0.083573 | 0.16184  | -4.74255 |
| LRR58        | 0.342791 | 6.928098 | 1.739021 | 0.08359  | 0.161851 | -5.62639 |
| SH3GL1       | 0.360457 | 7.07691  | 1.738047 | 0.083762 | 0.162161 | -5.62812 |
| TIMP2        | -0.60212 | 7.884715 | -1.73791 | 0.083787 | 0.162187 | -5.59107 |
| MTCH1        | -0.23452 | 6.993237 | -1.73775 | 0.083814 | 0.162217 | -5.62309 |
| ZNF430       | -0.39343 | 2.937031 | -1.73737 | 0.083882 | 0.162326 | -5.23962 |
| LAMA5        | 0.43509  | 8.535571 | 1.736286 | 0.084073 | 0.162674 | -5.60267 |
| LOC100131691 | -0.43061 | 0.147408 | -1.7361  | 0.084106 | 0.162698 | -4.76344 |
| CEBPG        | 0.3448   | 6.257355 | 1.736086 | 0.084109 | 0.162698 | -5.61498 |
| WIPI1        | -0.42718 | 4.69077  | -1.73559 | 0.084198 | 0.162847 | -5.54827 |
| SNX13        | -0.29017 | 6.074976 | -1.73501 | 0.0843   | 0.163023 | -5.62962 |
| CTU2         | 0.331885 | 3.25789  | 1.734806 | 0.084336 | 0.163047 | -5.1726  |
| NF2          | -0.27748 | 5.548416 | -1.73483 | 0.084331 | 0.163047 | -5.6095  |
| PRODH        | 1.662961 | 2.776257 | 1.734627 | 0.084368 | 0.163086 | -4.88144 |
| KMO          | 0.83634  | 0.244269 | 1.7345   | 0.08439  | 0.163093 | -4.63768 |
| UBASH3B      | 0.730053 | 3.764058 | 1.734476 | 0.084394 | 0.163093 | -5.20657 |
| SULT2B1      | 2.276378 | 3.724691 | 1.734165 | 0.08445  | 0.163177 | -4.93972 |
| MYSM1        | -0.37617 | 3.511896 | -1.73409 | 0.084464 | 0.163181 | -5.36457 |
| ANGPTL4      | -0.75147 | 3.46026  | -1.73394 | 0.08449  | 0.16321  | -5.42205 |
| C2orf89      | 1.702417 | 1.35173  | 1.733849 | 0.084506 | 0.163218 | -4.67476 |
| LOC441294    | 0.801001 | 2.882712 | 1.733776 | 0.084519 | 0.16322  | -5.02017 |
| CDSN         | 1.9417   | 2.208082 | 1.733341 | 0.084596 | 0.163315 | -4.76039 |
| DOK3         | 0.62187  | 2.793141 | 1.733303 | 0.084603 | 0.163315 | -5.03682 |
| NOSIP        | 0.293576 | 4.685812 | 1.733334 | 0.084598 | 0.163315 | -5.47271 |
| DSC2         | 0.969841 | 7.613847 | 1.733201 | 0.084621 | 0.163328 | -5.63574 |
| MRPL33       | -0.2185  | 4.206468 | -1.73309 | 0.084642 | 0.163345 | -5.47005 |
| ZNF432       | -0.46612 | 3.008395 | -1.73301 | 0.084655 | 0.163348 | -5.27464 |
| ARIH1        | -0.22163 | 6.558909 | -1.73289 | 0.084676 | 0.163365 | -5.63708 |
| DUSP18       | 0.374388 | 3.872019 | 1.732787 | 0.084695 | 0.16338  | -5.30075 |
| RANBP3       | -0.19415 | 5.835119 | -1.73258 | 0.084732 | 0.163429 | -5.62368 |
| RECQL5       | -0.26729 | 4.78364  | -1.73245 | 0.084756 | 0.163452 | -5.54858 |
| FBN1         | -0.84165 | 6.437234 | -1.73224 | 0.084793 | 0.163501 | -5.63228 |
| TGDS         | 0.35314  | 3.730402 | 1.731784 | 0.084874 | 0.163635 | -5.27432 |
| CAPN1        | 0.389272 | 8.449867 | 1.731634 | 0.084901 | 0.163664 | -5.61195 |
| C1orf203     | -0.37085 | 1.008093 | -1.73145 | 0.084933 | 0.163703 | -4.88932 |

|          |          |          |          |          |          |          |
|----------|----------|----------|----------|----------|----------|----------|
| IL16     | -0.54465 | 3.512663 | -1.73137 | 0.084948 | 0.163709 | -5.40313 |
| BRD1     | -0.24256 | 5.949689 | -1.73121 | 0.084977 | 0.163742 | -5.63175 |
| ECH1     | -0.43807 | 6.620247 | -1.73093 | 0.085027 | 0.163816 | -5.63781 |
| RRN3P3   | -0.31929 | 2.335009 | -1.73083 | 0.085045 | 0.163829 | -5.10837 |
| SLC44A5  | 1.905066 | 2.941783 | 1.730746 | 0.08506  | 0.163834 | -4.88034 |
| PPP2R3C  | -0.25414 | 4.040733 | -1.73047 | 0.085109 | 0.163907 | -5.45268 |
| HGD      | -1.7201  | 0.187409 | -1.73024 | 0.085149 | 0.163928 | -4.93803 |
| TRMT61A  | 0.323762 | 4.400082 | 1.73021  | 0.085155 | 0.163928 | -5.42615 |
| HR       | 0.868034 | 6.561071 | 1.73021  | 0.085155 | 0.163928 | -5.6157  |
| CAP1     | 0.374735 | 8.427597 | 1.729791 | 0.085231 | 0.164048 | -5.6154  |
| UBP1     | -0.24217 | 6.313317 | -1.72973 | 0.085241 | 0.164048 | -5.64173 |
| SLC5A3   | 0.39961  | 5.460337 | 1.729491 | 0.085284 | 0.164108 | -5.56256 |
| ARHGEF11 | -0.23984 | 6.747443 | -1.72935 | 0.08531  | 0.164135 | -5.64129 |
| CORO1A   | 0.68695  | 4.492445 | 1.728982 | 0.085376 | 0.164239 | -5.38111 |
| MYH9     | 0.344302 | 10.89399 | 1.728725 | 0.085422 | 0.164305 | -5.53214 |
| TFAM     | 0.313981 | 4.726809 | 1.728412 | 0.085478 | 0.164346 | -5.48446 |
| DIAPH2   | -0.44595 | 4.646496 | -1.72828 | 0.085502 | 0.164346 | -5.55826 |
| FCHSD2   | -0.3787  | 5.10723  | -1.72831 | 0.085496 | 0.164346 | -5.59621 |
| LRRFIP1  | -0.35096 | 7.565018 | -1.7283  | 0.085498 | 0.164346 | -5.62425 |
| ADH5     | -0.3059  | 6.440276 | -1.72853 | 0.085456 | 0.164346 | -5.6446  |
| NRGN     | 0.639918 | 1.818724 | 1.72756  | 0.085631 | 0.164554 | -4.88238 |
| ANXA4    | 0.609032 | 7.053863 | 1.727546 | 0.085633 | 0.164554 | -5.64467 |
| TMEM9B   | -0.27083 | 5.339344 | -1.72722 | 0.085691 | 0.164642 | -5.60826 |
| NDUFA13  | -0.29623 | 6.098889 | -1.72706 | 0.085721 | 0.164676 | -5.64373 |
| PIKFYVE  | -0.28585 | 5.576157 | -1.72653 | 0.085816 | 0.164836 | -5.62547 |
| CYP2C18  | -1.22529 | 3.079797 | -1.7263  | 0.085858 | 0.164875 | -5.42892 |
| SHROOM4  | -0.59418 | 3.760987 | -1.72629 | 0.085859 | 0.164875 | -5.46356 |
| GEMIN7   | 0.300711 | 3.467482 | 1.726221 | 0.085872 | 0.164876 | -5.23643 |
| MYO1G    | 0.814654 | 2.700733 | 1.725743 | 0.085958 | 0.164997 | -5.00356 |
| ASB7     | 0.254882 | 4.62189  | 1.725767 | 0.085954 | 0.164997 | -5.48141 |
| LDLRAD3  | 0.668046 | 3.76488  | 1.725258 | 0.086046 | 0.165142 | -5.23557 |
| PRKCZ    | 0.482087 | 4.933462 | 1.724392 | 0.086202 | 0.165419 | -5.49859 |
| ZDHHC7   | -0.31177 | 5.918096 | -1.72425 | 0.086227 | 0.165445 | -5.64439 |
| OSBPL11  | 0.329733 | 4.823512 | 1.724049 | 0.086264 | 0.165493 | -5.50431 |
| PDZK1IP1 | 1.65139  | 5.162819 | 1.723806 | 0.086308 | 0.165555 | -5.33499 |
| PDIA5    | -0.40313 | 4.401173 | -1.7237  | 0.086327 | 0.165569 | -5.53237 |
| CCDC59   | 0.308359 | 4.274823 | 1.723432 | 0.086376 | 0.165639 | -5.41553 |
| TMSL3    | -0.45837 | 9.740513 | -1.72315 | 0.086426 | 0.165713 | -5.55685 |
| TRIM21   | 0.401196 | 4.25838  | 1.722657 | 0.086517 | 0.165857 | -5.39576 |
| MED14    | 0.306333 | 6.892467 | 1.722609 | 0.086525 | 0.165857 | -5.65436 |
| VAV1     | 0.890466 | 2.149576 | 1.721996 | 0.086636 | 0.166047 | -4.9116  |
| APOBEC3A | 1.836835 | 1.333216 | 1.721556 | 0.086716 | 0.166155 | -4.68224 |
| CTSL1    | 0.604496 | 5.534458 | 1.721561 | 0.086715 | 0.166155 | -5.56458 |
| TRIM41   | -0.26726 | 4.834315 | -1.72053 | 0.086903 | 0.166489 | -5.57432 |
| MCOLN2   | 1.010851 | 0.764764 | 1.720435 | 0.08692  | 0.1665   | -4.70162 |
| ZNHIT6   | 0.251401 | 4.328324 | 1.720151 | 0.086972 | 0.166576 | -5.44246 |
| GGA1     | -0.21024 | 5.816038 | -1.72005 | 0.08699  | 0.166587 | -5.64468 |
| ARV1     | -0.3052  | 3.968015 | -1.71971 | 0.087052 | 0.16666  | -5.46664 |
| MOBKL2B  | -0.6478  | 4.584066 | -1.71976 | 0.087043 | 0.16666  | -5.58301 |
| SNN      | -0.4437  | 4.715019 | -1.7196  | 0.087072 | 0.166676 | -5.58042 |
| SLC4A1AP | 0.201861 | 4.854773 | 1.718568 | 0.087261 | 0.167014 | -5.53192 |
| TTC27    | 0.268748 | 4.272889 | 1.718457 | 0.087281 | 0.16703  | -5.43091 |
| FLJ45445 | 0.961802 | 4.605302 | 1.718055 | 0.087354 | 0.167131 | -5.36747 |
| ATP5L    | -0.35315 | 6.525967 | -1.71804 | 0.087358 | 0.167131 | -5.66173 |
| HOXA5    | 0.598875 | 1.800207 | 1.71721  | 0.087509 | 0.167392 | -4.90449 |
| NAV1     | 0.698958 | 6.71589  | 1.717161 | 0.087518 | 0.167392 | -5.6523  |
| C1orf151 | -0.26795 | 5.683732 | -1.71663 | 0.087614 | 0.167554 | -5.64687 |
| DLGAP4   | 0.257352 | 6.86569  | 1.716013 | 0.087728 | 0.167749 | -5.66562 |

|          |       |          |          |          |          |          |          |
|----------|-------|----------|----------|----------|----------|----------|----------|
| MYO7A    |       | 0.863616 | 3.015727 | 1.715443 | 0.087833 | 0.167926 | -5.06514 |
| TAB1     |       | -0.21385 | 4.81065  | -1.71535 | 0.087851 | 0.167936 | -5.57576 |
| C6orf105 |       | -0.96079 | 1.968983 | -1.71503 | 0.087908 | 0.168024 | -5.1649  |
| DUSP4    |       | -0.96496 | 4.200146 | -1.71463 | 0.087983 | 0.168143 | -5.57818 |
| COPS6    |       | 0.329344 | 6.353881 | 1.714473 | 0.088011 | 0.168175 | -5.65632 |
| GSTCD    |       | 0.37022  | 3.980801 | 1.714217 | 0.088058 | 0.168241 | -5.35662 |
| ZBTB17   |       | -0.23493 | 4.657031 | -1.71369 | 0.088155 | 0.168403 | -5.56317 |
| DHRS13   |       | 0.500474 | 3.355477 | 1.71316  | 0.088253 | 0.168457 | -5.19755 |
| MACC1    |       | 1.29706  | 5.15659  | 1.713146 | 0.088256 | 0.168457 | -5.42342 |
| RAB34    |       | 0.698772 | 5.244234 | 1.713188 | 0.088248 | 0.168457 | -5.53458 |
|          | 5-Sep | -0.82954 | 4.073937 | -1.71326 | 0.088234 | 0.168457 | -5.55747 |
| CD109    |       | 1.137011 | 5.906257 | 1.713357 | 0.088217 | 0.168457 | -5.56619 |
| TTC38    |       | -0.46562 | 4.612986 | -1.71339 | 0.08821  | 0.168457 | -5.5803  |
| MLKL     |       | 0.420764 | 4.224382 | 1.712669 | 0.088343 | 0.168602 | -5.4018  |
| ZNF321   |       | -0.77131 | 1.542111 | -1.71163 | 0.088536 | 0.168923 | -5.0653  |
| GTF2H5   |       | -0.32111 | 4.305397 | -1.71164 | 0.088533 | 0.168923 | -5.53321 |
| NKPD1    |       | 1.070022 | 0.567521 | 1.710572 | 0.088731 | 0.169212 | -4.69049 |
| NME6     |       | -0.24858 | 3.148003 | -1.71054 | 0.088737 | 0.169212 | -5.30044 |
| ALPK1    |       | -0.37646 | 4.463694 | -1.71069 | 0.088709 | 0.169212 | -5.56023 |
| ATP6V1C1 |       | 0.247256 | 6.227632 | 1.71051  | 0.088742 | 0.169212 | -5.66086 |
| APOL6    |       | 0.498883 | 7.087253 | 1.710482 | 0.088748 | 0.169212 | -5.67471 |
| TMED9    |       | 0.254429 | 6.430594 | 1.710386 | 0.088765 | 0.169222 | -5.66802 |
| REL      |       | 0.49265  | 3.761898 | 1.71032  | 0.088778 | 0.169223 | -5.29143 |
| RAB11A   |       | -0.31785 | 7.549306 | -1.71016 | 0.088807 | 0.169255 | -5.65611 |
| IL2RG    |       | 1.106097 | 4.737585 | 1.709954 | 0.088845 | 0.169305 | -5.38016 |
| SYT13    |       | -1.50943 | 1.950614 | -1.70895 | 0.089031 | 0.169636 | -5.27108 |
| MCCC1    |       | -0.38888 | 4.938959 | -1.70848 | 0.08912  | 0.169759 | -5.61553 |
| RRAGA    |       | -0.27324 | 5.80164  | -1.70852 | 0.089112 | 0.169759 | -5.6659  |
| C11orf73 |       | 0.342339 | 4.179316 | 1.708167 | 0.089177 | 0.169845 | -5.41644 |
| TMLHE    |       | -0.26737 | 3.404084 | -1.70745 | 0.089311 | 0.170077 | -5.36658 |
| PGGT1B   |       | -0.23653 | 3.834429 | -1.70694 | 0.089406 | 0.170234 | -5.45165 |
| ANXA11   |       | -0.43816 | 7.97124  | -1.7061  | 0.089561 | 0.170507 | -5.64688 |
| FAM111A  |       | 0.384448 | 5.468873 | 1.705882 | 0.089603 | 0.170562 | -5.60388 |
| GTF2E2   |       | 0.349569 | 4.848036 | 1.705321 | 0.089707 | 0.170739 | -5.53565 |
| MERTK    |       | -0.57108 | 3.463111 | -1.70523 | 0.089725 | 0.170749 | -5.43951 |
| MTO1     |       | -0.23819 | 4.358368 | -1.70514 | 0.08974  | 0.170755 | -5.54093 |
| DDX5     |       | -0.21097 | 8.915294 | -1.70506 | 0.089756 | 0.170761 | -5.62291 |
| KPNA5    |       | -0.44499 | 1.317059 | -1.70471 | 0.089822 | 0.170863 | -4.99451 |
| APC      |       | -0.3101  | 5.7235   | -1.70422 | 0.089913 | 0.171014 | -5.6712  |
| ORC4L    |       | 0.239528 | 4.751633 | 1.703716 | 0.090008 | 0.17117  | -5.53904 |
| STAG3L4  |       | -0.31785 | 2.75282  | -1.70312 | 0.090119 | 0.171359 | -5.24033 |
| NOD1     |       | 0.347627 | 4.097581 | 1.703032 | 0.090136 | 0.171367 | -5.40751 |
| MAP3K7   |       | 0.227445 | 5.147415 | 1.702787 | 0.090182 | 0.171431 | -5.59059 |
| HLA-DRB1 |       | 0.937757 | 5.922298 | 1.702683 | 0.090201 | 0.171433 | -5.60497 |
| DLAT     |       | -0.27389 | 5.684858 | -1.70265 | 0.090207 | 0.171433 | -5.67069 |
| NFU1     |       | -0.26738 | 3.905794 | -1.70226 | 0.090281 | 0.171551 | -5.47837 |
| ICAM2    |       | -0.59193 | 2.555098 | -1.7016  | 0.090404 | 0.17176  | -5.25202 |
| CYBASC3  |       | 0.287964 | 5.593607 | 1.701354 | 0.090451 | 0.171824 | -5.63222 |
| PGD      |       | 0.652573 | 7.24985  | 1.701295 | 0.090462 | 0.171824 | -5.69    |
| ABTB1    |       | -0.39579 | 4.369505 | -1.70111 | 0.090496 | 0.171865 | -5.56632 |
| EAF1     |       | -0.30376 | 5.313122 | -1.70059 | 0.090595 | 0.172029 | -5.65345 |
| HMHA1    |       | 0.466594 | 4.619639 | 1.70011  | 0.090685 | 0.172177 | -5.49318 |
| TFAP2C   |       | 2.267911 | 3.625895 | 1.699926 | 0.09072  | 0.172219 | -4.9828  |
| AP1S2    |       | -0.43381 | 3.256039 | -1.69973 | 0.090758 | 0.172239 | -5.38259 |
| UROD     |       | -0.25373 | 4.679948 | -1.69971 | 0.09076  | 0.172239 | -5.5915  |
| CCDC124  |       | 0.294938 | 5.189037 | 1.699675 | 0.090767 | 0.172239 | -5.5937  |
| LPAR2    |       | 0.424503 | 4.36409  | 1.698984 | 0.090897 | 0.172455 | -5.4486  |
| DOCK1    |       | -0.28707 | 6.431573 | -1.69894 | 0.090906 | 0.172455 | -5.69452 |

|            |          |          |          |          |          |          |
|------------|----------|----------|----------|----------|----------|----------|
| ELFN1      | 0.779793 | 2.193385 | 1.698778 | 0.090936 | 0.172467 | -4.96954 |
| SPTLC1     | 0.249388 | 6.560108 | 1.69883  | 0.090926 | 0.172467 | -5.69076 |
| RPF1       | 0.231156 | 4.806643 | 1.698271 | 0.091032 | 0.17258  | -5.55668 |
| RAPGEF1    | -0.3054  | 6.953347 | -1.69838 | 0.091011 | 0.17258  | -5.68921 |
| HOOK3      | -0.3713  | 6.822166 | -1.69826 | 0.091033 | 0.17258  | -5.6907  |
| SIRT3      | -0.25059 | 4.404973 | -1.69757 | 0.091165 | 0.172807 | -5.56087 |
| CNOT8      | -0.20042 | 5.490346 | -1.69583 | 0.091494 | 0.173407 | -5.66758 |
| TAF5L      | 0.225301 | 4.934233 | 1.695445 | 0.091567 | 0.173522 | -5.57837 |
| MYBL1      | 0.603519 | 2.277745 | 1.695375 | 0.091581 | 0.173524 | -5.01494 |
| C20orf103  | 1.306606 | 0.209869 | 1.695295 | 0.091596 | 0.173529 | -4.69317 |
| IK         | -0.19977 | 5.703441 | -1.69506 | 0.091641 | 0.173592 | -5.68117 |
| CTAGE6     | 0.663461 | 0.024838 | 1.694164 | 0.091811 | 0.173889 | -4.69662 |
| PMS2L11    | 0.5467   | 2.592997 | 1.693962 | 0.091849 | 0.173939 | -5.0772  |
| ZC3H15     | 0.279831 | 6.097832 | 1.69365  | 0.091909 | 0.174028 | -5.68171 |
| NEDD8      | 0.271304 | 5.775592 | 1.693283 | 0.091979 | 0.174127 | -5.66218 |
| MORF4L1    | 0.218419 | 6.204249 | 1.693244 | 0.091986 | 0.174127 | -5.68993 |
| RNF187     | 0.341729 | 6.803313 | 1.691984 | 0.092227 | 0.174559 | -5.70474 |
| RTTN       | 0.379745 | 3.798342 | 1.691641 | 0.092292 | 0.174659 | -5.3522  |
| KIAA1704   | -0.27067 | 3.869068 | -1.69121 | 0.092374 | 0.174791 | -5.49042 |
| KLC1       | -0.26647 | 6.031783 | -1.69066 | 0.09248  | 0.174967 | -5.70286 |
| RPRD1B     | 0.216786 | 6.039115 | 1.690121 | 0.092583 | 0.175128 | -5.68751 |
| LIMA1      | 0.421327 | 7.562695 | 1.690083 | 0.09259  | 0.175128 | -5.70362 |
| TNFAIP8L2  | 0.667215 | 0.623925 | 1.689859 | 0.092633 | 0.175162 | -4.77432 |
| PDCL       | 0.247304 | 4.42035  | 1.689828 | 0.092639 | 0.175162 | -5.50986 |
| MTIF2      | 0.249385 | 5.31207  | 1.689795 | 0.092646 | 0.175162 | -5.62753 |
| TPRG1      | 1.561966 | 1.982703 | 1.689671 | 0.092669 | 0.175183 | -4.84913 |
| SLC29A2    | 0.76469  | 4.077121 | 1.68944  | 0.092714 | 0.175219 | -5.33815 |
| JRKL       | 0.33095  | 4.003321 | 1.689451 | 0.092712 | 0.175219 | -5.40972 |
| BSDC1      | -0.19868 | 6.49231  | -1.6893  | 0.09274  | 0.175245 | -5.71058 |
| PIGK       | -0.28439 | 5.093764 | -1.68913 | 0.092774 | 0.175286 | -5.65347 |
| SLC22A18AS | 0.917518 | 0.316154 | 1.688962 | 0.092805 | 0.175298 | -4.70875 |
| HLA-DQB2   | 1.303843 | 1.083107 | 1.689001 | 0.092798 | 0.175298 | -4.76175 |
| CREM       | -0.31364 | 3.947113 | -1.68785 | 0.093019 | 0.175677 | -5.51829 |
| FAM83C     | 2.945712 | 1.520213 | 1.687543 | 0.093078 | 0.175728 | -4.71198 |
| SPATA7     | -0.36578 | 2.245806 | -1.68763 | 0.093061 | 0.175728 | -5.16983 |
| ST7L       | -0.34598 | 3.769678 | -1.68752 | 0.093083 | 0.175728 | -5.49096 |
| VCAN       | 0.843205 | 6.913361 | 1.687216 | 0.093141 | 0.175813 | -5.70425 |
| ACAT2      | 0.580448 | 4.545145 | 1.686885 | 0.093205 | 0.175909 | -5.48189 |
| ANKRD57    | 0.549893 | 6.334695 | 1.68666  | 0.093248 | 0.175967 | -5.69294 |
| NOXA1      | -0.63975 | 2.015742 | -1.68575 | 0.093423 | 0.17625  | -5.173   |
| COQ10B     | -0.24597 | 4.663565 | -1.68581 | 0.093412 | 0.17625  | -5.61189 |
| FAR2       | 1.065417 | 2.625736 | 1.685062 | 0.093557 | 0.176478 | -5.01957 |
| LOC493754  | -0.21679 | 4.676246 | -1.6848  | 0.093606 | 0.176524 | -5.61209 |
| HNRNPA3    | 0.246329 | 7.670001 | 1.684832 | 0.093601 | 0.176524 | -5.70727 |
| FZD3       | -0.50832 | 3.188554 | -1.68409 | 0.093745 | 0.176753 | -5.4062  |
| CORO7      | 0.349787 | 5.271535 | 1.684046 | 0.093753 | 0.176753 | -5.62282 |
| PRKCA      | -0.6118  | 5.614629 | -1.68386 | 0.093789 | 0.176797 | -5.71052 |
| NOS3       | -0.57951 | 3.811433 | -1.68359 | 0.093841 | 0.176872 | -5.54131 |
| CDK2AP2    | 0.381841 | 6.187823 | 1.683265 | 0.093904 | 0.176967 | -5.69873 |
| FAM35B2    | -0.27255 | 1.534635 | -1.68301 | 0.093953 | 0.177035 | -5.03987 |
| ZNF624     | 0.365162 | 2.364928 | 1.682932 | 0.093969 | 0.177041 | -5.08507 |
| NAPRT1     | 0.595663 | 5.994187 | 1.682836 | 0.093988 | 0.177052 | -5.67313 |
| SNHG8      | -0.37075 | 4.236883 | -1.68228 | 0.094096 | 0.177232 | -5.57806 |
| FAM81A     | 1.043085 | 1.410198 | 1.681638 | 0.09422  | 0.177395 | -4.84464 |
| CHCHD4     | -0.2597  | 3.336333 | -1.68167 | 0.094213 | 0.177395 | -5.3929  |
| LENG8      | -0.35271 | 7.204687 | -1.68167 | 0.094215 | 0.177395 | -5.7111  |
| APOB48R    | 0.693294 | 2.669462 | 1.680531 | 0.094436 | 0.177752 | -5.09265 |
| PTPRJ      | -0.67972 | 5.177469 | -1.68059 | 0.094423 | 0.177752 | -5.69854 |

|           |          |          |          |          |          |          |
|-----------|----------|----------|----------|----------|----------|----------|
| FAM122B   | 0.316725 | 5.53161  | 1.680464 | 0.094449 | 0.177753 | -5.65897 |
| C18orf55  | -0.30875 | 3.675186 | -1.68011 | 0.094518 | 0.177859 | -5.47895 |
| C16orf61  | 0.295586 | 4.014206 | 1.679631 | 0.094611 | 0.17801  | -5.4359  |
| TCTE3     | 0.430747 | 1.141797 | 1.679261 | 0.094683 | 0.178104 | -4.88841 |
| HLA-DQB1  | 1.118172 | 5.111021 | 1.679244 | 0.094686 | 0.178104 | -5.50877 |
| LIPH      | -1.129   | 3.976748 | -1.67827 | 0.094876 | 0.178437 | -5.62775 |
| SLC9A5    | 0.566194 | 0.276549 | 1.678001 | 0.094929 | 0.178496 | -4.75924 |
| ASB9      | -0.74354 | 0.742558 | -1.67798 | 0.094933 | 0.178496 | -4.9859  |
| FCGR2C    | -0.71939 | 0.293587 | -1.67781 | 0.094967 | 0.178535 | -4.9172  |
| FIBP      | 0.291947 | 5.391092 | 1.677574 | 0.095013 | 0.178598 | -5.65221 |
| RNF145    | 0.32015  | 6.679959 | 1.677373 | 0.095052 | 0.178648 | -5.72743 |
| BAP1      | -0.23427 | 6.216604 | -1.67713 | 0.095099 | 0.178713 | -5.72856 |
| KRTCAP3   | 0.972684 | 3.86249  | 1.677059 | 0.095113 | 0.178715 | -5.26536 |
| LIN7C     | -0.27436 | 6.143431 | -1.67677 | 0.095171 | 0.178798 | -5.72845 |
| MSL1      | 0.337417 | 6.323602 | 1.676665 | 0.095191 | 0.178812 | -5.71783 |
| MRPS34    | 0.333842 | 5.547769 | 1.676437 | 0.095235 | 0.178872 | -5.66555 |
| LOC729799 | -0.49578 | 0.062429 | -1.67619 | 0.095284 | 0.178939 | -4.85738 |
| ZXDC      | -0.26599 | 6.079741 | -1.6759  | 0.09534  | 0.17902  | -5.72847 |
| TCFL5     | 0.354675 | 4.490173 | 1.675191 | 0.09548  | 0.179259 | -5.53012 |
| C5orf56   | -0.52025 | 1.711924 | -1.67468 | 0.095581 | 0.179424 | -5.11889 |
| TXN2      | -0.25205 | 5.585736 | -1.67417 | 0.095681 | 0.179589 | -5.71194 |
| COMMD7    | 0.326303 | 5.290938 | 1.67375  | 0.095763 | 0.179718 | -5.64471 |
| GPR158    | 1.598279 | 1.290233 | 1.673184 | 0.095875 | 0.179904 | -4.77725 |
| NMT2      | -0.34559 | 3.660859 | -1.6731  | 0.095891 | 0.179909 | -5.4929  |
| TRIP12    | -0.23413 | 7.58003  | -1.67304 | 0.095904 | 0.179909 | -5.71907 |
| EWSR1     | 0.149247 | 7.636822 | 1.672748 | 0.095961 | 0.179992 | -5.72613 |
| LOC222699 | 0.800696 | 0.487909 | 1.67264  | 0.095982 | 0.180008 | -4.76961 |
| COX19     | 0.319286 | 4.356922 | 1.672552 | 0.095999 | 0.180015 | -5.51279 |
| YIPF1     | -0.24489 | 4.509206 | -1.67249 | 0.096011 | 0.180015 | -5.61475 |
| SDHAP3    | -0.50842 | 1.462512 | -1.67238 | 0.096033 | 0.180032 | -5.0806  |
| CAST      | -0.40762 | 8.075259 | -1.67231 | 0.096048 | 0.180035 | -5.70053 |
| ZNF828    | -0.28575 | 5.540037 | -1.67158 | 0.096192 | 0.180281 | -5.71537 |
| KCNMB3    | 0.538435 | 2.099236 | 1.671356 | 0.096236 | 0.180339 | -5.03327 |
| SLFN11    | 0.698632 | 4.897446 | 1.67124  | 0.096259 | 0.180357 | -5.55135 |
| MTF1      | -0.29823 | 5.123017 | -1.67053 | 0.0964   | 0.180584 | -5.68815 |
| PLCD3     | -0.59488 | 6.156694 | -1.6705  | 0.096405 | 0.180584 | -5.74134 |
| FAF2      | 0.204646 | 6.473307 | 1.670053 | 0.096494 | 0.180725 | -5.73744 |
| DUS2L     | 0.355791 | 3.424704 | 1.66982  | 0.09654  | 0.180787 | -5.31148 |
| MED1      | 0.332752 | 6.29904  | 1.669618 | 0.09658  | 0.180838 | -5.72863 |
| IDH1      | 0.439369 | 6.925052 | 1.669288 | 0.096645 | 0.180936 | -5.74253 |
| BTN3A2    | 0.529032 | 5.374301 | 1.668757 | 0.096751 | 0.181103 | -5.64155 |
| SH3RF1    | -0.49209 | 5.467128 | -1.66871 | 0.09676  | 0.181103 | -5.72536 |
| SMC1A     | 0.264359 | 7.357622 | 1.668358 | 0.09683  | 0.181209 | -5.74076 |
| FUT8      | -0.54928 | 5.158086 | -1.66828 | 0.096845 | 0.181213 | -5.71071 |
| ATP6V0A1  | -0.3033  | 6.201061 | -1.66745 | 0.09701  | 0.181498 | -5.74515 |
| EMILIN2   | 0.56195  | 3.824863 | 1.666721 | 0.097155 | 0.181745 | -5.36366 |
| OLFM1     | -0.96676 | 3.032654 | -1.6664  | 0.097219 | 0.18184  | -5.49089 |
| KRR1      | 0.232141 | 5.300844 | 1.666266 | 0.097246 | 0.181866 | -5.66714 |
| ZDHHC21   | -0.43876 | 3.90673  | -1.66607 | 0.097286 | 0.181905 | -5.56571 |
| ENOSF1    | -0.3636  | 4.371301 | -1.66603 | 0.097293 | 0.181905 | -5.62134 |
| DNM1      | 0.837088 | 4.41714  | 1.665783 | 0.097343 | 0.181973 | -5.43914 |
| BTN3A3    | 0.60988  | 4.13872  | 1.665628 | 0.097373 | 0.182007 | -5.42384 |
| MXRA7     | -0.57209 | 6.173868 | -1.66506 | 0.097487 | 0.182194 | -5.7503  |
| LSM14A    | 0.229449 | 6.890684 | 1.664907 | 0.097518 | 0.182227 | -5.75076 |
| KIFC2     | 0.569612 | 4.605938 | 1.664403 | 0.097618 | 0.182387 | -5.53184 |
| DENND3    | -0.47765 | 4.443076 | -1.66435 | 0.097629 | 0.182387 | -5.64473 |
| C1orf58   | 0.328711 | 4.54361  | 1.664202 | 0.097658 | 0.182393 | -5.56049 |
| FNBP1L    | -0.43891 | 5.951447 | -1.66423 | 0.097652 | 0.182393 | -5.74801 |

|           |          |          |          |          |          |          |
|-----------|----------|----------|----------|----------|----------|----------|
| EXOC3     | -0.29765 | 5.978525 | -1.66411 | 0.097678 | 0.182404 | -5.74601 |
| DHX57     | 0.249137 | 4.755128 | 1.663941 | 0.097711 | 0.182442 | -5.60462 |
| FLJ45244  | -0.45095 | 0.011537 | -1.66368 | 0.097763 | 0.182503 | -4.86462 |
| LRRC28    | -0.28265 | 3.841362 | -1.66365 | 0.09777  | 0.182503 | -5.53198 |
| EIF3M     | 0.302552 | 6.825663 | 1.662913 | 0.097917 | 0.182753 | -5.75337 |
| PGS1      | 0.246868 | 4.640042 | 1.662842 | 0.097931 | 0.182755 | -5.58981 |
| HIST1H1C  | 0.866925 | 4.407227 | 1.662412 | 0.098017 | 0.182892 | -5.43496 |
| MICAL2    | -0.57074 | 6.940419 | -1.66226 | 0.098047 | 0.182923 | -5.74448 |
| COMMD9    | 0.307092 | 4.898616 | 1.662141 | 0.098071 | 0.182944 | -5.61935 |
| LPAR6     | 0.679689 | 4.447068 | 1.661872 | 0.098125 | 0.183021 | -5.48626 |
| ISOC2     | 0.352791 | 4.518198 | 1.661795 | 0.098141 | 0.183025 | -5.55667 |
| SLC44A3   | -0.82726 | 3.164861 | -1.66153 | 0.098194 | 0.1831   | -5.48756 |
| PRDM4     | -0.20223 | 5.491399 | -1.66145 | 0.098211 | 0.183107 | -5.72456 |
| TSC22D4   | 0.319741 | 5.736423 | 1.661273 | 0.098246 | 0.183148 | -5.70837 |
| NUMA1     | -0.34932 | 8.735976 | -1.66058 | 0.098386 | 0.183384 | -5.69852 |
| A2LD1     | -0.4388  | 2.227593 | -1.66027 | 0.098447 | 0.183474 | -5.22125 |
| ZDHHC9    | 0.353795 | 6.500072 | 1.660117 | 0.098478 | 0.183508 | -5.75073 |
| TMEM116   | -0.59296 | 2.841085 | -1.65991 | 0.09852  | 0.183536 | -5.38261 |
| ECHDC1    | -0.24756 | 5.536669 | -1.65994 | 0.098513 | 0.183536 | -5.73225 |
| ALX3      | -0.48199 | 0.466472 | -1.65935 | 0.098633 | 0.183698 | -4.94068 |
| PI4KB     | -0.2071  | 6.389033 | -1.65935 | 0.098633 | 0.183698 | -5.75957 |
| NUPL1     | 0.273934 | 6.146052 | 1.659162 | 0.098671 | 0.183744 | -5.74127 |
| CYTH1     | -0.26654 | 5.813627 | -1.65902 | 0.0987   | 0.183773 | -5.74811 |
| CSMD2     | 1.064364 | 0.312955 | 1.658929 | 0.098718 | 0.183782 | -4.75109 |
| SORD      | 0.517551 | 5.538948 | 1.658566 | 0.098791 | 0.183894 | -5.67712 |
| FECH      | -0.41069 | 4.378389 | -1.65836 | 0.098833 | 0.183947 | -5.64085 |
| NPL       | 0.73721  | 3.742544 | 1.657844 | 0.098937 | 0.184117 | -5.32877 |
| SMAD3     | 0.410766 | 7.023874 | 1.65753  | 0.099001 | 0.18421  | -5.76262 |
| GTPBP5    | 0.270525 | 4.478277 | 1.657412 | 0.099024 | 0.18423  | -5.5692  |
| ZNF613    | -0.57882 | 1.632039 | -1.6569  | 0.099129 | 0.184399 | -5.14446 |
| NIPSNAP3A | -0.30634 | 4.131949 | -1.65672 | 0.099165 | 0.184441 | -5.59746 |
| TRAF7     | 0.303107 | 7.342069 | 1.656657 | 0.099177 | 0.184441 | -5.76071 |
| PEX11G    | -0.39147 | 0.720303 | -1.65625 | 0.099259 | 0.18452  | -4.97012 |
| REST      | -0.26788 | 5.078663 | -1.65626 | 0.099258 | 0.18452  | -5.70515 |
| DARS      | 0.276912 | 6.721117 | 1.656265 | 0.099257 | 0.18452  | -5.7634  |
| AAAS      | 0.27393  | 5.071996 | 1.6561   | 0.09929  | 0.184553 | -5.65415 |
| EIF2B1    | 0.216338 | 5.565463 | 1.655579 | 0.099396 | 0.184724 | -5.71122 |
| KRT16     | 4.39486  | 6.134614 | 1.655254 | 0.099462 | 0.184822 | -5.1433  |
| SIRPB1    | 0.707204 | 1.443816 | 1.655062 | 0.099501 | 0.184845 | -4.93627 |
| SFRS8     | 0.194347 | 5.489699 | 1.655102 | 0.099493 | 0.184845 | -5.7069  |
| CAPN12    | 0.697505 | 2.836457 | 1.654734 | 0.099567 | 0.184908 | -5.15684 |
| SHROOM1   | -0.44896 | 4.07408  | -1.65469 | 0.099577 | 0.184908 | -5.6095  |
| KIAA1598  | 0.321214 | 5.922778 | 1.654555 | 0.099604 | 0.184908 | -5.73302 |
| SQSTM1    | 0.362126 | 8.464739 | 1.65457  | 0.099601 | 0.184908 | -5.73912 |
| FAM160A2  | -0.30864 | 5.502551 | -1.65444 | 0.099626 | 0.184908 | -5.74222 |
| CPSF2     | 0.229913 | 6.382576 | 1.654442 | 0.099627 | 0.184908 | -5.75994 |
| QSER1     | 0.417448 | 6.568721 | 1.654594 | 0.099596 | 0.184908 | -5.76004 |
| MARK3     | -0.28257 | 6.080613 | -1.65319 | 0.099881 | 0.185355 | -5.766   |
| C11orf24  | 0.377164 | 5.693142 | 1.651665 | 0.100193 | 0.185908 | -5.71568 |
| UBE2CBP   | 0.370565 | 2.076421 | 1.651434 | 0.10024  | 0.185971 | -5.08629 |
| IFFO1     | -0.45793 | 1.987382 | -1.6512  | 0.100288 | 0.186016 | -5.19857 |
| PRDX2     | -0.39772 | 6.797727 | -1.65118 | 0.100291 | 0.186016 | -5.76833 |
| OS9       | -0.21    | 7.724026 | -1.65094 | 0.100341 | 0.186085 | -5.75195 |
| SBF1      | -0.32742 | 7.370852 | -1.65084 | 0.100361 | 0.186098 | -5.75848 |
| C5orf36   | -0.40481 | 0.651887 | -1.64996 | 0.100541 | 0.186406 | -4.97333 |
| KPNA6     | -0.21271 | 7.078796 | -1.64972 | 0.10059  | 0.186472 | -5.76862 |
| HSD11B1   | -0.74911 | 0.044616 | -1.64919 | 0.1007   | 0.186651 | -4.92891 |
| C4orf19   | -1.21329 | 2.648621 | -1.64894 | 0.10075  | 0.186719 | -5.46783 |

|           |          |          |          |          |          |          |
|-----------|----------|----------|----------|----------|----------|----------|
| ZNF185    | 1.079415 | 6.34731  | 1.648679 | 0.100804 | 0.186794 | -5.72186 |
| MGAT4A    | -0.78337 | 4.832213 | -1.6482  | 0.100903 | 0.186953 | -5.73475 |
| COX5B     | -0.33316 | 6.801682 | -1.64733 | 0.10108  | 0.187257 | -5.77551 |
| TRPV1     | -0.43977 | 2.790581 | -1.64719 | 0.10111  | 0.187287 | -5.36283 |
| IQSEC2    | -0.34409 | 4.234147 | -1.64693 | 0.101164 | 0.187363 | -5.63292 |
| BCL3      | 0.393886 | 6.84278  | 1.646857 | 0.101178 | 0.187364 | -5.77879 |
| SYN1      | -0.69658 | 0.766382 | -1.64648 | 0.101255 | 0.187432 | -5.0373  |
| INTS4     | 0.238172 | 4.645824 | 1.646545 | 0.101243 | 0.187432 | -5.61807 |
| SERP1     | -0.27366 | 7.818218 | -1.64661 | 0.10123  | 0.187432 | -5.75458 |
| DISP2     | -0.79596 | 1.758635 | -1.64598 | 0.10136  | 0.187551 | -5.21245 |
| IL18BP    | 0.571033 | 3.968672 | 1.646006 | 0.101354 | 0.187551 | -5.42834 |
| UBQLN4    | 0.265137 | 6.135835 | 1.646075 | 0.101339 | 0.187551 | -5.76245 |
| VCAM1     | 0.869841 | 4.061336 | 1.645629 | 0.101431 | 0.187658 | -5.38977 |
| MX1       | 0.698743 | 6.650643 | 1.645337 | 0.101491 | 0.187745 | -5.76866 |
| PHF7      | -0.35426 | 1.089203 | -1.64519 | 0.101522 | 0.187777 | -5.04097 |
| C3orf54   | 0.932233 | 0.750556 | 1.644752 | 0.101612 | 0.187919 | -4.83209 |
| KATNA1    | 0.241441 | 3.688682 | 1.644628 | 0.101638 | 0.187932 | -5.43327 |
| TNFAIP8   | 0.502251 | 4.426456 | 1.644587 | 0.101646 | 0.187932 | -5.54199 |
| DPH3B     | 0.386201 | 0.404313 | 1.643946 | 0.101779 | 0.188152 | -4.8504  |
| CHST14    | 0.451576 | 4.441052 | 1.643495 | 0.101872 | 0.1883   | -5.55534 |
| UAP1L1    | 0.629532 | 4.474103 | 1.643064 | 0.101961 | 0.18844  | -5.52748 |
| CCDC45    | 0.266645 | 4.55731  | 1.642451 | 0.102088 | 0.188594 | -5.60731 |
| CLSTN3    | 0.386718 | 5.583988 | 1.642483 | 0.102082 | 0.188594 | -5.72021 |
| SKI       | -0.31608 | 7.146925 | -1.6424  | 0.102099 | 0.188594 | -5.7773  |
| ALCAM     | -0.67726 | 6.390801 | -1.64258 | 0.102062 | 0.188594 | -5.78442 |
| PPDPF     | -0.38179 | 8.605715 | -1.64233 | 0.102114 | 0.188597 | -5.73164 |
| ACVR2B    | -0.36805 | 3.913531 | -1.64221 | 0.102139 | 0.188608 | -5.59416 |
| NDOR1     | -0.3156  | 5.715205 | -1.64217 | 0.102147 | 0.188608 | -5.77312 |
| PTGIR     | 0.639319 | 0.626752 | 1.642053 | 0.102171 | 0.188628 | -4.85235 |
| ZDHHC13   | 0.40946  | 4.931125 | 1.640424 | 0.102509 | 0.189227 | -5.64632 |
| TMEM107   | 0.450447 | 2.676726 | 1.640143 | 0.102568 | 0.18931  | -5.19418 |
| C17orf90  | 0.335866 | 3.681818 | 1.639844 | 0.10263  | 0.189375 | -5.41929 |
| C1orf57   | 0.339108 | 4.075525 | 1.639901 | 0.102618 | 0.189375 | -5.50582 |
| NFKBID    | 0.449341 | 1.824424 | 1.639513 | 0.102699 | 0.189477 | -5.0539  |
| C19orf54  | 0.27695  | 4.234861 | 1.638974 | 0.102811 | 0.189659 | -5.55156 |
| LOC441869 | -0.82687 | 2.220785 | -1.63869 | 0.102871 | 0.189744 | -5.33345 |
| DKK1      | 2.012847 | 2.909785 | 1.638383 | 0.102934 | 0.189836 | -5.0067  |
| COL17A1   | 1.657784 | 6.696312 | 1.63821  | 0.102971 | 0.189878 | -5.72027 |
| NLGN4X    | -0.88414 | 1.575969 | -1.63807 | 0.102999 | 0.189905 | -5.21434 |
| LOC91316  | -0.3554  | 3.806525 | -1.63801 | 0.103012 | 0.189905 | -5.57898 |
| INPP5E    | 0.319752 | 4.187871 | 1.637809 | 0.103054 | 0.189957 | -5.5375  |
| PELI3     | -0.39064 | 3.377313 | -1.6377  | 0.103077 | 0.189974 | -5.5012  |
| C9orf6    | 0.271965 | 4.555778 | 1.637539 | 0.103111 | 0.190011 | -5.61419 |
| NEK8      | 0.403345 | 1.963676 | 1.637079 | 0.103207 | 0.190163 | -5.085   |
| TRIM16    | 0.578711 | 6.403326 | 1.636978 | 0.103228 | 0.190177 | -5.77624 |
| ZMAT3     | -0.33007 | 3.689949 | -1.63684 | 0.103257 | 0.190197 | -5.55561 |
| NEK7      | -0.30664 | 6.624869 | -1.6368  | 0.103266 | 0.190197 | -5.79535 |
| PCNX      | -0.29292 | 6.361512 | -1.63657 | 0.103313 | 0.190258 | -5.79676 |
| DDX58     | 0.527742 | 5.045761 | 1.636424 | 0.103344 | 0.19029  | -5.65418 |
| FDXR      | 0.543155 | 3.853729 | 1.636187 | 0.103394 | 0.190331 | -5.4231  |
| C2orf79   | 0.352396 | 3.77258  | 1.636201 | 0.103391 | 0.190331 | -5.44219 |
| C19orf21  | 1.942805 | 5.338975 | 1.635973 | 0.103438 | 0.190389 | -5.45535 |
| SATB2     | 0.680723 | 3.119062 | 1.635454 | 0.103547 | 0.190564 | -5.24455 |
| RNF168    | 0.47546  | 4.322536 | 1.6352   | 0.103601 | 0.190628 | -5.54008 |
| ICA1      | -1.03319 | 3.431135 | -1.63514 | 0.103614 | 0.190628 | -5.61694 |
| WBP4      | -0.31837 | 4.19916  | -1.63509 | 0.103623 | 0.190628 | -5.64411 |
| FAM45B    | 0.337716 | 2.940299 | 1.635001 | 0.103642 | 0.190638 | -5.26963 |
| ZNF785    | -0.30318 | 3.455418 | -1.63481 | 0.103683 | 0.190689 | -5.50339 |

|            |          |          |          |          |          |          |
|------------|----------|----------|----------|----------|----------|----------|
| SFT2D3     | 0.287318 | 4.301429 | 1.634125 | 0.103826 | 0.190927 | -5.57114 |
| RFK        | -0.49326 | 5.270143 | -1.63401 | 0.10385  | 0.190945 | -5.77077 |
| CSGALNACT2 | 0.39882  | 4.99533  | 1.633753 | 0.103904 | 0.19102  | -5.66764 |
| MTFMT      | 0.237112 | 3.039625 | 1.633335 | 0.103992 | 0.191157 | -5.31101 |
| FBXO33     | -0.2396  | 4.534844 | -1.6325  | 0.104168 | 0.191435 | -5.68255 |
| C1RL       | -0.34233 | 5.133216 | -1.63249 | 0.104171 | 0.191435 | -5.75407 |
| DNAJA2     | -0.2012  | 6.060972 | -1.63145 | 0.104389 | 0.191809 | -5.799   |
| SSBP4      | 0.303634 | 4.647832 | 1.631051 | 0.104474 | 0.191941 | -5.63523 |
| TPR        | 0.228602 | 7.587348 | 1.630893 | 0.104507 | 0.191977 | -5.79672 |
| C6orf154   | -0.65524 | 0.272572 | -1.63065 | 0.104559 | 0.192046 | -4.979   |
| ASCC2      | -0.26035 | 6.072075 | -1.63054 | 0.104581 | 0.192061 | -5.80202 |
| MTMR11     | 0.804997 | 4.343973 | 1.630309 | 0.10463  | 0.192127 | -5.48625 |
| RNF113A    | 0.281256 | 3.620408 | 1.629968 | 0.104703 | 0.192235 | -5.43318 |
| HHEX       | 0.761519 | 2.706936 | 1.629848 | 0.104728 | 0.192256 | -5.16833 |
| DHX36      | 0.312498 | 5.912631 | 1.629583 | 0.104784 | 0.192334 | -5.77351 |
| ANKRD35    | -0.90516 | 1.53098  | -1.62931 | 0.104843 | 0.192416 | -5.22574 |
| DSG3       | 3.971737 | 6.204265 | 1.629015 | 0.104904 | 0.192504 | -5.26776 |
| ELP2       | -0.30386 | 4.92636  | -1.62846 | 0.105023 | 0.19267  | -5.73872 |
| POGZ       | -0.25647 | 6.684422 | -1.62848 | 0.105018 | 0.19267  | -5.80858 |
| ZNF718     | -0.53909 | 1.612077 | -1.62762 | 0.105201 | 0.192971 | -5.18194 |
| RP9P       | 0.396487 | 3.315061 | 1.627515 | 0.105223 | 0.192986 | -5.34803 |
| ZNF702P    | -0.88942 | 0.837201 | -1.62728 | 0.105272 | 0.193052 | -5.1024  |
| CD274      | 0.835121 | 0.998121 | 1.627198 | 0.10529  | 0.193059 | -4.90107 |
| TLK2       | 0.198073 | 4.660369 | 1.62673  | 0.105389 | 0.193216 | -5.65791 |
| ADCK4      | -0.2399  | 4.628671 | -1.62653 | 0.105433 | 0.19327  | -5.70356 |
| PRR16      | 0.652843 | 1.221472 | 1.626344 | 0.105472 | 0.193316 | -4.95536 |
| SUPT7L     | 0.15393  | 5.681367 | 1.626278 | 0.105486 | 0.193317 | -5.77241 |
| MEOX1      | -0.72572 | 0.620897 | -1.62509 | 0.105738 | 0.193754 | -5.05196 |
| NMD3       | -0.24836 | 6.080345 | -1.62451 | 0.105862 | 0.193955 | -5.81164 |
| TPD52L1    | -0.90225 | 4.562074 | -1.62442 | 0.105883 | 0.193968 | -5.75961 |
| GUF1       | -0.31677 | 5.606306 | -1.62427 | 0.105914 | 0.194    | -5.79707 |
| ESR2       | 0.555843 | 0.323327 | 1.624047 | 0.105961 | 0.194061 | -4.85035 |
| SHISA4     | -0.54021 | 2.351512 | -1.62384 | 0.106006 | 0.194096 | -5.32748 |
| GBF1       | -0.22907 | 7.383517 | -1.62383 | 0.106008 | 0.194096 | -5.80374 |
| FAM22A     | -0.53013 | 0.529304 | -1.62355 | 0.106067 | 0.194167 | -5.01261 |
| PEMT       | 0.41572  | 4.131107 | 1.623452 | 0.106088 | 0.194167 | -5.53021 |
| NDUFA2     | -0.27992 | 4.675192 | -1.62347 | 0.106084 | 0.194167 | -5.71761 |
| PYGL       | 1.103916 | 5.411508 | 1.622764 | 0.106236 | 0.194385 | -5.65589 |
| BIN1       | -0.57535 | 4.77401  | -1.62278 | 0.106232 | 0.194385 | -5.75488 |
| DHRS4      | -0.44199 | 3.18603  | -1.62234 | 0.106327 | 0.194527 | -5.49176 |
| SIK1       | -0.55338 | 6.506379 | -1.62196 | 0.106407 | 0.194648 | -5.8177  |
| C18orf19   | 0.365669 | 4.166651 | 1.621359 | 0.106537 | 0.194859 | -5.55119 |
| COL13A1    | 0.718821 | 1.105658 | 1.621173 | 0.106577 | 0.194907 | -4.93725 |
| PPIP5K1    | -0.29633 | 5.231517 | -1.62044 | 0.106733 | 0.195168 | -5.77764 |
| SLC35B2    | 0.412426 | 5.462359 | 1.620147 | 0.106797 | 0.195258 | -5.74109 |
| UBE2K      | -0.22064 | 6.756854 | -1.61994 | 0.106842 | 0.195316 | -5.82179 |
| PLVAP      | -0.51711 | 6.702909 | -1.61967 | 0.106899 | 0.195394 | -5.81881 |
| MMP28      | -0.83919 | 3.076015 | -1.61955 | 0.106925 | 0.195416 | -5.54675 |
| SMUG1      | 0.257696 | 4.4346   | 1.619473 | 0.106942 | 0.195421 | -5.6242  |
| LRRC8E     | 0.766337 | 3.923197 | 1.619272 | 0.106985 | 0.195475 | -5.41919 |
| HEY1       | 0.999718 | 3.067543 | 1.619059 | 0.107031 | 0.195533 | -5.20999 |
| GCNT1      | -0.87659 | 4.192497 | -1.61899 | 0.107046 | 0.195535 | -5.72608 |
| C5AR1      | 0.754898 | 3.402992 | 1.618222 | 0.107211 | 0.195811 | -5.31537 |
| CCNT1      | -0.32205 | 3.643641 | -1.61767 | 0.107331 | 0.195979 | -5.57501 |
| OAT        | -0.35039 | 6.496493 | -1.61767 | 0.107331 | 0.195979 | -5.82679 |
| FAM134A    | -0.20145 | 6.546662 | -1.6176  | 0.107345 | 0.195979 | -5.82738 |
| KRT5       | 3.506291 | 7.719107 | 1.617537 | 0.107359 | 0.195979 | -5.67065 |
| TTBK2      | -0.41024 | 3.155171 | -1.61731 | 0.107408 | 0.196043 | -5.48838 |



|               |          |          |          |          |          |          |
|---------------|----------|----------|----------|----------|----------|----------|
| LIG3          | 0.318336 | 5.049035 | 1.617233 | 0.107425 | 0.196047 | -5.70919 |
| MUC12         | 1.814874 | 0.578637 | 1.617074 | 0.107459 | 0.196084 | -4.81657 |
| DKFZP586I1420 | -0.35077 | 3.828415 | -1.61689 | 0.107499 | 0.196131 | -5.61728 |
| SUGT1         | 0.294104 | 5.1453   | 1.616722 | 0.107535 | 0.196172 | -5.7239  |
| LASS4         | -0.92331 | 3.940963 | -1.61649 | 0.107584 | 0.196236 | -5.70955 |
| KIAA1644      | -0.81049 | 1.605448 | -1.61559 | 0.107779 | 0.196566 | -5.24218 |
| DPY19L2P2     | -0.74523 | 0.206481 | -1.61445 | 0.108026 | 0.196991 | -5.00749 |
| RB1           | 0.37145  | 6.795756 | 1.614388 | 0.10804  | 0.196991 | -5.83062 |
| RPS6KC1       | -0.28975 | 4.904307 | -1.61389 | 0.108149 | 0.197164 | -5.75854 |
| RHOA          | -0.22674 | 8.633052 | -1.61373 | 0.108184 | 0.1972   | -5.7814  |
| CRABP2        | 1.552132 | 4.720568 | 1.613513 | 0.10823  | 0.19726  | -5.45218 |
| CABLES2       | 0.372613 | 4.336957 | 1.613332 | 0.10827  | 0.19728  | -5.59659 |
| POLR2J        | 0.370637 | 5.344475 | 1.613372 | 0.108261 | 0.19728  | -5.7438  |
| RPP38         | 0.282227 | 3.962079 | 1.612713 | 0.108404 | 0.197474 | -5.53527 |
| NCAPH2        | 0.291936 | 5.16164  | 1.612761 | 0.108394 | 0.197474 | -5.73245 |
| HOXA3         | 0.659871 | 3.283791 | 1.611659 | 0.108634 | 0.19784  | -5.32206 |
| RAB8B         | -0.34672 | 4.781006 | -1.61168 | 0.108629 | 0.19784  | -5.75439 |
| CHRNA1        | 0.553338 | 2.273025 | 1.611527 | 0.108663 | 0.197855 | -5.15577 |
| PLK1S1        | -0.38842 | 3.494293 | -1.61147 | 0.108674 | 0.197855 | -5.56451 |
| ZFAND2B       | -0.30309 | 3.889453 | -1.61143 | 0.108684 | 0.197855 | -5.62817 |
| MCART1        | -0.23728 | 3.391451 | -1.61114 | 0.108747 | 0.197943 | -5.51506 |
| KRT22         | -0.45555 | 0.395141 | -1.61056 | 0.108873 | 0.198092 | -5.00288 |
| FGF11         | 1.266065 | 2.972143 | 1.61044  | 0.1089   | 0.198092 | -5.16664 |
| RNF217        | -0.88733 | 2.605094 | -1.61053 | 0.108881 | 0.198092 | -5.47287 |
| ANKRD5        | 0.45437  | 3.94062  | 1.61047  | 0.108893 | 0.198092 | -5.49748 |
| ZKSCAN1       | -0.39244 | 6.406716 | -1.61068 | 0.108846 | 0.198092 | -5.83813 |
| NR2C1         | 0.339922 | 4.19474  | 1.610038 | 0.108987 | 0.198226 | -5.57813 |
| MUC4          | 2.758975 | 5.268002 | 1.608985 | 0.109217 | 0.198619 | -5.33269 |
| WDR35         | -0.39994 | 4.231296 | -1.60866 | 0.109289 | 0.198723 | -5.70068 |
| SDR39U1       | -0.25267 | 3.989368 | -1.60833 | 0.109361 | 0.198803 | -5.64443 |
| ARL5A         | -0.22524 | 6.02551  | -1.60835 | 0.109357 | 0.198803 | -5.8355  |
| KIAA0195      | -0.29241 | 6.646894 | -1.60809 | 0.109413 | 0.198871 | -5.84114 |
| GALNT7        | -0.50221 | 6.210237 | -1.60731 | 0.109585 | 0.199158 | -5.84344 |
| TLR8          | 0.960239 | 0.356589 | 1.606504 | 0.109761 | 0.1994   | -4.8383  |
| DERA          | 0.346258 | 5.138031 | 1.606549 | 0.109751 | 0.1994   | -5.73391 |
| SPTBN2        | 0.7418   | 6.516327 | 1.606586 | 0.109743 | 0.1994   | -5.82285 |
| EFEMP2        | -0.54807 | 4.154845 | -1.60633 | 0.1098   | 0.199445 | -5.71152 |
| TBC1D8B       | -0.47017 | 4.240379 | -1.60609 | 0.109851 | 0.199477 | -5.71154 |
| RAB31         | 0.625558 | 6.139856 | 1.606052 | 0.109861 | 0.199477 | -5.80724 |
| ITGA5         | -0.57441 | 7.157204 | -1.60609 | 0.109853 | 0.199477 | -5.8301  |
| ANXA3         | -0.71468 | 5.195796 | -1.6058  | 0.109916 | 0.199551 | -5.82233 |
| GCC2          | -0.48193 | 6.180305 | -1.60567 | 0.109945 | 0.199578 | -5.84589 |
| ABR           | -0.32036 | 7.214738 | -1.60555 | 0.109972 | 0.1996   | -5.83476 |
| PAPOLA        | 0.193903 | 7.99584  | 1.605203 | 0.110048 | 0.199712 | -5.82762 |
| ZNF514        | -0.31868 | 3.562099 | -1.60513 | 0.110064 | 0.199716 | -5.57542 |
| ZNF563        | -0.43286 | 0.541707 | -1.60495 | 0.110104 | 0.199753 | -5.03065 |
| GRHL1         | 0.936061 | 5.031364 | 1.604906 | 0.110113 | 0.199753 | -5.64563 |
| TTC14         | -0.3893  | 4.864523 | -1.60482 | 0.110133 | 0.199763 | -5.77757 |
| PPP1R10       | -0.24575 | 6.590296 | -1.60456 | 0.110188 | 0.199838 | -5.84766 |
| LILRB1        | 0.806696 | 1.329102 | 1.604426 | 0.110219 | 0.199867 | -4.98549 |
| USP32         | 0.245363 | 6.119254 | 1.604356 | 0.110234 | 0.199869 | -5.82937 |
| S100P         | -1.40571 | 4.766293 | -1.60412 | 0.110287 | 0.199939 | -5.83048 |
| DCP1A         | -0.23757 | 5.619879 | -1.60341 | 0.110442 | 0.200194 | -5.82736 |
| CHMP7         | -0.2378  | 5.095909 | -1.60329 | 0.110469 | 0.200218 | -5.78913 |
| ARHGDI1       | 0.265578 | 8.726434 | 1.602918 | 0.110551 | 0.200315 | -5.81053 |
| PRELID1       | 0.371256 | 6.407409 | 1.602919 | 0.110551 | 0.200315 | -5.83906 |
| HIC1          | -0.482   | 3.461952 | -1.60277 | 0.110584 | 0.200348 | -5.59199 |
| MRPS26        | 0.314154 | 4.635068 | 1.602435 | 0.110658 | 0.200456 | -5.67724 |

|              |          |          |          |          |          |          |
|--------------|----------|----------|----------|----------|----------|----------|
| C9orf78      | 0.231951 | 5.571423 | 1.602315 | 0.110685 | 0.200478 | -5.79582 |
| CLIP2        | -0.41219 | 5.987658 | -1.60179 | 0.110801 | 0.200662 | -5.84878 |
| VAV3         | -0.87239 | 4.255313 | -1.60117 | 0.110938 | 0.200885 | -5.76366 |
| IL18         | 0.787995 | 4.60884  | 1.60107  | 0.11096  | 0.200899 | -5.59558 |
| CLDN3        | 3.557942 | 3.528572 | 1.600958 | 0.110985 | 0.2009   | -4.94525 |
| ADCY9        | -0.3628  | 5.385988 | -1.60094 | 0.11099  | 0.2009   | -5.82416 |
| TUBGCP3      | 0.288355 | 4.880524 | 1.600581 | 0.111069 | 0.201017 | -5.71791 |
| UBOX5        | -0.25921 | 4.060842 | -1.60026 | 0.111139 | 0.201118 | -5.67    |
| RTKL1        | 0.392739 | 5.203558 | 1.600045 | 0.111188 | 0.201128 | -5.74653 |
| MRPL30       | 0.231689 | 5.560338 | 1.60006  | 0.111184 | 0.201128 | -5.79839 |
| MYCBP2       | -0.36524 | 6.921728 | -1.60012 | 0.111171 | 0.201128 | -5.84843 |
| GNL3         | 0.283692 | 6.055233 | 1.599744 | 0.111254 | 0.201211 | -5.83151 |
| TALDO1       | 0.403944 | 7.555294 | 1.59971  | 0.111262 | 0.201211 | -5.84993 |
| C14orf167    | -0.3191  | 4.508395 | -1.59846 | 0.11154  | 0.201665 | -5.74209 |
| MED23        | -0.21511 | 5.540223 | -1.59845 | 0.111542 | 0.201665 | -5.82941 |
| LETM1        | -0.30569 | 6.322057 | -1.59676 | 0.111919 | 0.202319 | -5.86006 |
| SNAPIN       | 0.267541 | 4.256    | 1.596655 | 0.111942 | 0.202336 | -5.62625 |
| ERCC5        | -0.28655 | 5.698884 | -1.59572 | 0.11215  | 0.202685 | -5.84542 |
| CEP63        | -0.26563 | 4.309552 | -1.59554 | 0.112191 | 0.202733 | -5.71571 |
| CNPY4        | 0.428658 | 2.411966 | 1.595372 | 0.112229 | 0.202775 | -5.22227 |
| VTCN1        | 1.863527 | 1.056091 | 1.595144 | 0.112279 | 0.202801 | -4.85204 |
| ARL14        | -1.345   | 1.443102 | -1.59505 | 0.112301 | 0.202801 | -5.31959 |
| PTPN14       | -0.45536 | 4.734742 | -1.59505 | 0.112301 | 0.202801 | -5.78616 |
| RPL19        | 0.339497 | 9.158832 | 1.595055 | 0.112299 | 0.202801 | -5.8101  |
| SYT17        | -0.66118 | 2.185714 | -1.59471 | 0.112377 | 0.202911 | -5.36141 |
| SRI          | 0.408744 | 5.994255 | 1.594223 | 0.112486 | 0.203082 | -5.82912 |
| SETD1A       | 0.192779 | 6.28043  | 1.593821 | 0.112576 | 0.203218 | -5.85471 |
| C6orf147     | 0.581324 | -0.03651 | 1.593348 | 0.112682 | 0.203383 | -4.85288 |
| IL17RE       | -0.55993 | 4.031528 | -1.5931  | 0.112737 | 0.203456 | -5.71288 |
| ANKRD40      | -0.23587 | 6.114862 | -1.59261 | 0.112848 | 0.20363  | -5.86279 |
| DNASE2       | 0.279712 | 5.68114  | 1.592351 | 0.112906 | 0.203682 | -5.81712 |
| GFM1         | 0.25743  | 6.228551 | 1.592353 | 0.112905 | 0.203682 | -5.85267 |
| METTL5       | 0.248541 | 4.760859 | 1.591927 | 0.113001 | 0.203828 | -5.72044 |
| DPP4         | 1.570765 | 3.793904 | 1.591537 | 0.113089 | 0.20396  | -5.28286 |
| KRT6A        | 3.297961 | 7.51126  | 1.591468 | 0.113104 | 0.203961 | -5.71225 |
| PIGA         | 0.33738  | 4.216374 | 1.590825 | 0.113249 | 0.204196 | -5.61404 |
| METTL7B      | 1.886942 | 1.93083  | 1.590227 | 0.113384 | 0.204386 | -4.95196 |
| CWC27        | -0.23276 | 4.079393 | -1.59018 | 0.113394 | 0.204386 | -5.68563 |
| PCNXL3       | 0.238489 | 7.166487 | 1.590163 | 0.113398 | 0.204386 | -5.8688  |
| TMEM123      | 0.291183 | 8.31164  | 1.589897 | 0.113458 | 0.204468 | -5.84524 |
| C2CD4A       | 1.569619 | 2.131931 | 1.589685 | 0.113506 | 0.204527 | -5.01679 |
| LOC100190939 | -0.3997  | 2.253404 | -1.58952 | 0.113543 | 0.204568 | -5.33364 |
| ACVR1C       | 0.884949 | 2.514211 | 1.58938  | 0.113575 | 0.204579 | -5.17567 |
| MGAT2        | 0.231459 | 5.356441 | 1.589364 | 0.113578 | 0.204579 | -5.79588 |
| DYNLL1       | 0.301854 | 7.504429 | 1.589271 | 0.113599 | 0.20459  | -5.86565 |
| RASD2        | 0.870456 | 2.692492 | 1.589    | 0.11366  | 0.204674 | -5.21605 |
| ZNF277       | -0.29527 | 4.401352 | -1.58818 | 0.113845 | 0.20498  | -5.7421  |
| CD81         | -0.41685 | 7.832823 | -1.5879  | 0.11391  | 0.20507  | -5.84379 |
| NFKBIL1      | -0.24563 | 3.472384 | -1.58769 | 0.113956 | 0.2051   | -5.56973 |
| PPWD1        | -0.19353 | 4.016288 | -1.58771 | 0.113952 | 0.2051   | -5.6721  |
| LGR4         | -0.62886 | 6.191663 | -1.58713 | 0.114082 | 0.205301 | -5.87494 |
| STIM2        | 0.314535 | 4.910672 | 1.586713 | 0.114178 | 0.20542  | -5.73996 |
| PELP1        | 0.244044 | 6.365819 | 1.586742 | 0.114171 | 0.20542  | -5.86708 |
| PLXNB2       | -0.28461 | 9.20714  | -1.58641 | 0.114248 | 0.205519 | -5.80284 |
| TMED8        | -0.24176 | 4.368333 | -1.58587 | 0.114369 | 0.20571  | -5.73588 |
| KIAA0649     | -0.37679 | 5.125358 | -1.58511 | 0.114542 | 0.205996 | -5.83041 |
| CDC5L        | 0.277826 | 5.905062 | 1.584807 | 0.114611 | 0.206093 | -5.84606 |
| ANKRD22      | -0.77578 | 4.50957  | -1.58454 | 0.114672 | 0.206177 | -5.805   |

|           |          |          |          |          |          |          |
|-----------|----------|----------|----------|----------|----------|----------|
| METT11D1  | 0.224201 | 4.214117 | 1.584161 | 0.114758 | 0.206277 | -5.64418 |
| TMEM222   | -0.24029 | 4.723672 | -1.58417 | 0.114755 | 0.206277 | -5.78118 |
| ACPL2     | 0.482097 | 3.889708 | 1.58369  | 0.114865 | 0.206443 | -5.5264  |
| HDAC8     | 0.224268 | 3.690005 | 1.58342  | 0.114926 | 0.206528 | -5.53371 |
| VIM       | -0.51827 | 8.747103 | -1.58315 | 0.114987 | 0.20661  | -5.8166  |
| DSTYK     | -0.25425 | 4.848679 | -1.58304 | 0.115014 | 0.206632 | -5.79861 |
| TMEM38B   | 0.446812 | 3.991339 | 1.582631 | 0.115106 | 0.206771 | -5.55616 |
| BAG3      | -0.47472 | 7.046831 | -1.58248 | 0.115141 | 0.206806 | -5.87166 |
| PHKA2     | -0.31092 | 4.806309 | -1.5824  | 0.11516  | 0.206813 | -5.79995 |
| ZNF518A   | -0.37063 | 5.327915 | -1.58213 | 0.11522  | 0.206895 | -5.85002 |
| PRRX1     | 1.028463 | 4.285632 | 1.582021 | 0.115246 | 0.206915 | -5.51006 |
| PLEKHA8   | 0.344932 | 1.99502  | 1.581911 | 0.115271 | 0.206933 | -5.18569 |
| LGI2      | -0.81726 | 1.828388 | -1.58156 | 0.115351 | 0.207051 | -5.34309 |
| FLT4      | -0.4801  | 3.42792  | -1.58123 | 0.115426 | 0.20716  | -5.61478 |
| IFT140    | -0.30884 | 4.254046 | -1.58107 | 0.115463 | 0.207199 | -5.73593 |
| NEURL2    | -0.40446 | 0.813469 | -1.58092 | 0.115497 | 0.207233 | -5.10487 |
| CCNL1     | 0.315503 | 6.483442 | 1.580536 | 0.115585 | 0.207364 | -5.87838 |
| TMEFF1    | 0.616168 | 2.029165 | 1.580202 | 0.115661 | 0.207475 | -5.15439 |
| NSMCE4A   | -0.23056 | 4.662162 | -1.58011 | 0.115683 | 0.207487 | -5.77969 |
| IGFL1     | 1.942256 | -0.28283 | 1.579847 | 0.115743 | 0.207567 | -4.86761 |
| PGP       | 0.314924 | 4.452897 | 1.579495 | 0.115823 | 0.207685 | -5.6816  |
| PYCR1     | 0.525654 | 5.981727 | 1.579126 | 0.115908 | 0.207811 | -5.843   |
| THOC1     | 0.31901  | 4.380407 | 1.578945 | 0.11595  | 0.207832 | -5.66884 |
| JAK2      | -0.48662 | 4.631103 | -1.57896 | 0.115946 | 0.207832 | -5.80284 |
| P4HA1     | 0.440024 | 5.426751 | 1.578662 | 0.116014 | 0.207921 | -5.80009 |
| C16orf54  | -0.77058 | 0.555391 | -1.57801 | 0.116165 | 0.208117 | -5.1191  |
| ZNF773    | -0.50668 | 1.492309 | -1.57799 | 0.116168 | 0.208117 | -5.23444 |
| ZCCHC14   | -0.23756 | 6.177751 | -1.57802 | 0.116163 | 0.208117 | -5.88686 |
| C18orf25  | -0.34235 | 5.234002 | -1.5777  | 0.116235 | 0.20821  | -5.84875 |
| KRT6B     | 4.209898 | 6.04266  | 1.577459 | 0.116291 | 0.208283 | -5.2798  |
| PPP1R2P3  | 0.290404 | 1.764055 | 1.577116 | 0.11637  | 0.208318 | -5.16365 |
| FANK1     | -0.53023 | 1.208042 | -1.57719 | 0.116354 | 0.208318 | -5.18838 |
| C8orf38   | 0.268088 | 3.029691 | 1.577171 | 0.116357 | 0.208318 | -5.39022 |
| PFKL      | -0.2672  | 7.481224 | -1.57715 | 0.116361 | 0.208318 | -5.87429 |
| DHODH     | 0.32687  | 2.413321 | 1.576979 | 0.116401 | 0.208347 | -5.26512 |
| ZNFX1     | 0.344558 | 7.215443 | 1.576656 | 0.116476 | 0.208454 | -5.89041 |
| PLIN3     | 0.377634 | 6.53213  | 1.576577 | 0.116494 | 0.20846  | -5.88433 |
| FGFBP1    | 2.930376 | 4.471229 | 1.576408 | 0.116533 | 0.208476 | -5.21606 |
| ZNF317    | -0.18112 | 5.476198 | -1.57647 | 0.116518 | 0.208476 | -5.85784 |
| FLJ44606  | -0.60665 | 0.992937 | -1.57624 | 0.116571 | 0.208491 | -5.16672 |
| NOL12     | 0.27038  | 3.403573 | 1.576248 | 0.11657  | 0.208491 | -5.47077 |
| LOC387646 | 1.031598 | 0.909238 | 1.575917 | 0.116646 | 0.208588 | -4.944   |
| SCN8A     | 1.019759 | 1.388618 | 1.575877 | 0.116655 | 0.208588 | -5.0092  |
| MN1       | -0.81951 | 4.25724  | -1.5756  | 0.11672  | 0.208677 | -5.79988 |
| PTGR2     | -0.3363  | 3.431542 | -1.57544 | 0.116756 | 0.208694 | -5.59699 |
| GSTK1     | -0.38685 | 6.219473 | -1.57543 | 0.116759 | 0.208694 | -5.89314 |
| ASPH      | -0.37022 | 7.903303 | -1.57466 | 0.116937 | 0.208985 | -5.86344 |
| NEURL     | -0.73006 | 1.294711 | -1.57449 | 0.116976 | 0.209027 | -5.23768 |
| FOXJ2     | -0.28411 | 5.532016 | -1.57421 | 0.117039 | 0.209114 | -5.87053 |
| KLF13     | -0.33391 | 7.212927 | -1.57407 | 0.117073 | 0.209148 | -5.88386 |
| C11orf45  | 0.715872 | 1.477933 | 1.573491 | 0.117206 | 0.209332 | -5.06545 |
| PKN3      | 0.452978 | 4.047865 | 1.573512 | 0.117201 | 0.209332 | -5.58015 |
| ZFP41     | 0.305923 | 4.732719 | 1.573363 | 0.117236 | 0.209359 | -5.73807 |
| ZBTB7B    | -0.35591 | 6.925857 | -1.57328 | 0.117254 | 0.209364 | -5.89048 |
| CLP1      | 0.227326 | 3.408726 | 1.5729   | 0.117343 | 0.209469 | -5.48641 |
| TBPL1     | 0.262749 | 3.759586 | 1.572918 | 0.117339 | 0.209469 | -5.5563  |
| CES1      | -1.36635 | 2.671411 | -1.57227 | 0.117488 | 0.209702 | -5.64354 |
| TTLL12    | 0.429333 | 7.04031  | 1.57198  | 0.117556 | 0.209797 | -5.89875 |

|          |          |          |          |          |          |          |
|----------|----------|----------|----------|----------|----------|----------|
| ID3      | -0.42405 | 5.149973 | -1.57175 | 0.11761  | 0.209848 | -5.85687 |
| LEMD2    | 0.197899 | 5.984303 | 1.571727 | 0.117615 | 0.209848 | -5.87568 |
| OMA1     | -0.28214 | 3.702766 | -1.57155 | 0.117657 | 0.209895 | -5.6502  |
| NOMO3    | -0.32686 | 6.196038 | -1.57144 | 0.117681 | 0.209911 | -5.89855 |
| IL20RB   | 1.862846 | 3.249924 | 1.570724 | 0.117848 | 0.210123 | -5.18591 |
| TSGA14   | 0.494677 | 3.473103 | 1.570675 | 0.117859 | 0.210123 | -5.45126 |
| MACF1    | -0.4061  | 8.379389 | -1.57071 | 0.117852 | 0.210123 | -5.85221 |
| CYR61    | -0.61725 | 5.944864 | -1.57079 | 0.117832 | 0.210123 | -5.8993  |
| GOLGA7B  | 1.198331 | 2.538066 | 1.570275 | 0.117952 | 0.210227 | -5.16512 |
| ZNF324   | -0.31856 | 3.279121 | -1.57023 | 0.117963 | 0.210227 | -5.57042 |
| FOS      | -0.72837 | 7.959602 | -1.57032 | 0.117943 | 0.210227 | -5.85754 |
| C12orf66 | 0.342439 | 3.027688 | 1.569844 | 0.118053 | 0.210333 | -5.38815 |
| DOK4     | -0.48301 | 5.192805 | -1.56988 | 0.118045 | 0.210333 | -5.86633 |
| CIB1     | 0.4014   | 6.31855  | 1.569641 | 0.1181   | 0.21039  | -5.88626 |
| SERPINB4 | 2.702092 | 1.258859 | 1.569037 | 0.118241 | 0.210614 | -4.89177 |
| RNASE7   | 2.031371 | 0.15008  | 1.568757 | 0.118306 | 0.210623 | -4.88652 |
| GPR87    | 3.017592 | 1.987672 | 1.568765 | 0.118304 | 0.210623 | -4.89504 |
| PPM1N    | 0.685746 | 0.457421 | 1.568862 | 0.118281 | 0.210623 | -4.93632 |
| KLHL20   | -0.20101 | 4.298936 | -1.56894 | 0.118264 | 0.210623 | -5.74802 |
| RIMKLB   | -0.65049 | 3.418006 | -1.56854 | 0.118357 | 0.21066  | -5.66799 |
| GPATCH8  | 0.19868  | 6.509366 | 1.568603 | 0.118342 | 0.21066  | -5.9003  |
| FAM109B  | -0.35083 | 3.744025 | -1.56838 | 0.118393 | 0.210671 | -5.67605 |
| KIAA0652 | -0.21315 | 6.597572 | -1.56842 | 0.118384 | 0.210671 | -5.90433 |
| CERKL    | 0.63761  | 1.200885 | 1.568211 | 0.118433 | 0.210716 | -5.04265 |
| GRAMD3   | -0.37924 | 3.776082 | -1.56784 | 0.11852  | 0.210842 | -5.68806 |
| DGCR8    | -0.19232 | 5.257453 | -1.56766 | 0.118563 | 0.210892 | -5.85554 |
| PHLDB2   | -0.83441 | 5.59467  | -1.56693 | 0.118732 | 0.211166 | -5.90212 |
| GAS1     | -0.85098 | 3.145496 | -1.56684 | 0.118754 | 0.211179 | -5.64927 |
| DCUN1D2  | -0.29196 | 3.755435 | -1.5666  | 0.118811 | 0.211253 | -5.6712  |
| ZNF385A  | 0.823359 | 6.298082 | 1.566293 | 0.118881 | 0.211352 | -5.86747 |
| ZNF30    | -0.42684 | 1.742139 | -1.56601 | 0.118948 | 0.211443 | -5.28155 |
| C12orf75 | 0.746252 | 5.402137 | 1.565751 | 0.119008 | 0.211523 | -5.78328 |
| TYW1     | 0.268363 | 4.790216 | 1.565572 | 0.11905  | 0.211544 | -5.7627  |
| UPF3A    | -0.29119 | 4.559281 | -1.56559 | 0.119046 | 0.211544 | -5.79634 |
| STK38    | 0.271567 | 6.394364 | 1.564968 | 0.119192 | 0.211769 | -5.90103 |
| MUTED    | -0.2391  | 3.466646 | -1.56444 | 0.119316 | 0.211963 | -5.60341 |
| SLC7A5P2 | 0.515937 | 0.212101 | 1.564086 | 0.119399 | 0.212082 | -4.9311  |
| ZNF512B  | -0.55278 | 4.723415 | -1.5638  | 0.119466 | 0.212175 | -5.84226 |
| HSCB     | -0.24096 | 2.616663 | -1.56372 | 0.119484 | 0.21218  | -5.41982 |
| ALG12    | -0.2319  | 5.062888 | -1.56338 | 0.119564 | 0.212295 | -5.84775 |
| INO80D   | -0.28496 | 5.639752 | -1.56303 | 0.119648 | 0.212416 | -5.89353 |
| PTPDC1   | -0.30247 | 3.624928 | -1.56288 | 0.119683 | 0.212452 | -5.65148 |
| BCORL1   | 0.359072 | 4.867919 | 1.562731 | 0.119717 | 0.212486 | -5.76694 |
| STK32C   | 0.631837 | 2.386096 | 1.561531 | 0.12     | 0.212961 | -5.23803 |
| MICA     | -0.29739 | 3.497392 | -1.56113 | 0.120094 | 0.213078 | -5.62702 |
| LCP1     | 0.676336 | 6.020814 | 1.561122 | 0.120097 | 0.213078 | -5.86385 |
| INTS2    | 0.261468 | 4.785669 | 1.560897 | 0.12015  | 0.213145 | -5.77026 |
| CCDC15   | 0.43113  | 1.687585 | 1.560552 | 0.120231 | 0.213229 | -5.15499 |
| CKMT1A   | 1.072698 | 4.593702 | 1.560528 | 0.120237 | 0.213229 | -5.59231 |
| ZNF692   | 0.324112 | 3.936968 | 1.560503 | 0.120243 | 0.213229 | -5.6025  |
| FOXN1    | 2.295384 | 1.264911 | 1.560133 | 0.12033  | 0.213357 | -4.90477 |
| CCDC68   | -0.98362 | 2.457717 | -1.55999 | 0.120364 | 0.213386 | -5.52246 |
| ITGB1BP1 | 0.238527 | 5.070142 | 1.559933 | 0.120377 | 0.213386 | -5.81015 |
| CCRL1    | -0.69725 | 1.648862 | -1.55975 | 0.120421 | 0.213437 | -5.31097 |
| B3GNT2   | 0.29815  | 5.41589  | 1.559266 | 0.120535 | 0.213612 | -5.84249 |
| C1QA     | 0.792755 | 5.251789 | 1.559108 | 0.120572 | 0.213651 | -5.77109 |
| EFNA5    | -0.63812 | 3.496177 | -1.55883 | 0.120638 | 0.213659 | -5.69292 |
| RPS16    | 0.329794 | 8.585928 | 1.558867 | 0.120629 | 0.213659 | -5.88586 |

|          |          |          |          |          |          |          |
|----------|----------|----------|----------|----------|----------|----------|
| IGF1R    | -0.6351  | 6.736068 | -1.55897 | 0.120606 | 0.213659 | -5.91134 |
| SAPS1    | 0.232278 | 7.202543 | 1.558842 | 0.120635 | 0.213659 | -5.9169  |
| HSPA1A   | 0.597128 | 8.594618 | 1.558584 | 0.120696 | 0.213735 | -5.89348 |
| MSX1     | 0.703422 | 1.849055 | 1.558392 | 0.120742 | 0.213788 | -5.1463  |
| GCDH     | -0.28085 | 3.933249 | -1.55813 | 0.120803 | 0.213843 | -5.71696 |
| AKR7A2   | -0.28247 | 4.872768 | -1.55817 | 0.120796 | 0.213843 | -5.84151 |
| SFRS7    | 0.181744 | 6.537797 | 1.55803  | 0.120828 | 0.213859 | -5.91748 |
| MFAP3    | -0.20898 | 5.559486 | -1.55787 | 0.120865 | 0.213899 | -5.89349 |
| MANBAL   | 0.235425 | 5.462437 | 1.557318 | 0.120997 | 0.214104 | -5.8559  |
| TRUB2    | 0.246626 | 4.868866 | 1.557101 | 0.121048 | 0.214168 | -5.78864 |
| ALKBH4   | 0.324299 | 3.110246 | 1.556736 | 0.121135 | 0.214279 | -5.42782 |
| RNF8     | 0.219193 | 4.047034 | 1.556708 | 0.121141 | 0.214279 | -5.65394 |
| GGT6     | -1.05529 | 3.277883 | -1.55662 | 0.121163 | 0.21429  | -5.71447 |
| POLR3H   | -0.23458 | 5.321595 | -1.55622 | 0.121258 | 0.21443  | -5.8813  |
| C19orf10 | 0.279497 | 6.071338 | 1.555937 | 0.121325 | 0.214499 | -5.9006  |
| SDC3     | -0.43824 | 6.117335 | -1.55592 | 0.121328 | 0.214499 | -5.92262 |
| AKAP5    | 0.589366 | 1.537167 | 1.555403 | 0.121452 | 0.214691 | -5.11969 |
| MRPL42   | 0.243347 | 5.397967 | 1.555138 | 0.121515 | 0.214776 | -5.85194 |
| FAM98C   | -0.28995 | 3.455018 | -1.55477 | 0.121602 | 0.214903 | -5.62429 |
| NLRX1    | -0.46324 | 4.952535 | -1.55469 | 0.121621 | 0.214909 | -5.86999 |
| NAPA     | -0.2523  | 7.076676 | -1.55387 | 0.121818 | 0.215229 | -5.91932 |
| AMIGO2   | 0.851654 | 4.082436 | 1.553374 | 0.121935 | 0.215411 | -5.54206 |
| SNX20    | 0.69617  | 0.668205 | 1.553282 | 0.121957 | 0.215422 | -4.9857  |
| KDEL3    | 0.641127 | 4.95947  | 1.553146 | 0.12199  | 0.215452 | -5.75349 |
| SYMPK    | 0.188468 | 6.81691  | 1.552786 | 0.122076 | 0.215577 | -5.92854 |
| ARSA     | -0.32542 | 5.102407 | -1.55244 | 0.122158 | 0.215695 | -5.87547 |
| OSTF1    | 0.357165 | 5.079864 | 1.552159 | 0.122226 | 0.215787 | -5.81048 |
| C9orf100 | 0.541644 | 3.650301 | 1.55206  | 0.12225  | 0.215802 | -5.50486 |
| CCDC40   | -0.54394 | 1.059365 | -1.55183 | 0.122305 | 0.215873 | -5.20769 |
| AKAP11   | -0.28816 | 6.502542 | -1.55156 | 0.122369 | 0.215958 | -5.93039 |
| LRR3     | -0.47138 | 1.5748   | -1.55146 | 0.122392 | 0.215971 | -5.28098 |
| ZCCHC2   | -0.2959  | 4.68651  | -1.55131 | 0.122428 | 0.216008 | -5.83381 |
| IRGQ     | -0.27353 | 5.685237 | -1.55093 | 0.122521 | 0.216144 | -5.91389 |
| SERPINF2 | 0.847933 | 1.338839 | 1.55082  | 0.122546 | 0.216162 | -5.06436 |
| COMMD8   | 0.317502 | 4.311274 | 1.550627 | 0.122593 | 0.216216 | -5.69966 |
| AFTPH    | -0.21227 | 6.311352 | -1.55026 | 0.122681 | 0.216344 | -5.93139 |
| HCG18    | -0.30887 | 5.021477 | -1.5499  | 0.122766 | 0.216467 | -5.87106 |
| ABCG2    | -0.68513 | 1.63129  | -1.54948 | 0.122868 | 0.21662  | -5.32602 |
| SLC25A19 | 0.371092 | 3.452326 | 1.549406 | 0.122886 | 0.216624 | -5.50233 |
| TRIM47   | 0.447118 | 5.780267 | 1.549059 | 0.122969 | 0.216743 | -5.88009 |
| ZNF500   | -0.21568 | 3.547114 | -1.54894 | 0.122997 | 0.216765 | -5.6407  |
| ARL6     | -0.3416  | 1.38509  | -1.54857 | 0.123087 | 0.216896 | -5.23595 |
| ARMC5    | -0.23396 | 4.08282  | -1.54844 | 0.123118 | 0.216924 | -5.75146 |
| BEND3    | 0.369763 | 3.992319 | 1.5481   | 0.1232   | 0.21704  | -5.62297 |
| TBC1D15  | -0.23178 | 5.530179 | -1.54782 | 0.123268 | 0.217133 | -5.90827 |
| ECE1     | 0.329074 | 7.618473 | 1.547386 | 0.123372 | 0.217288 | -5.92869 |
| CREB3L4  | -0.40694 | 3.017994 | -1.54722 | 0.123411 | 0.217303 | -5.55926 |
| COPB2    | 0.23268  | 7.695587 | 1.547259 | 0.123402 | 0.217303 | -5.92554 |
| C18orf10 | 0.366685 | 5.863931 | 1.547095 | 0.123442 | 0.21733  | -5.89577 |
| GPR98    | 1.725626 | 1.200394 | 1.546351 | 0.123621 | 0.217618 | -4.94493 |
| PNMA1    | -0.35798 | 5.316004 | -1.54622 | 0.123652 | 0.217644 | -5.90428 |
| ZMIZ2    | 0.275199 | 7.338532 | 1.5461   | 0.123682 | 0.21767  | -5.93489 |
| RARRES1  | 1.280607 | 3.438154 | 1.545885 | 0.123734 | 0.217734 | -5.34414 |
| HIBADH   | -0.33575 | 5.156759 | -1.54575 | 0.123766 | 0.217762 | -5.89095 |
| PSMC6    | 0.233925 | 5.522561 | 1.544766 | 0.124004 | 0.218155 | -5.8806  |
| PLEKHG6  | 0.871589 | 4.782243 | 1.544504 | 0.124068 | 0.218239 | -5.69793 |
| CRNKL1   | 0.235695 | 5.263722 | 1.544417 | 0.124089 | 0.218249 | -5.85548 |
| TFB1M    | 0.298656 | 3.054744 | 1.54313  | 0.124401 | 0.21877  | -5.44155 |

|            |          |          |          |          |          |          |
|------------|----------|----------|----------|----------|----------|----------|
| PEX10      | 0.270593 | 4.290545 | 1.543015 | 0.124428 | 0.218791 | -5.71476 |
| DUOX1      | -0.92209 | 5.891771 | -1.54265 | 0.124516 | 0.218918 | -5.94305 |
| ST6GALNAC4 | 0.414672 | 4.329396 | 1.541969 | 0.124682 | 0.219182 | -5.69827 |
| TMEM50A    | 0.193438 | 6.887819 | 1.5419   | 0.124699 | 0.219185 | -5.94523 |
| NDUFB1     | -0.25387 | 4.483384 | -1.54171 | 0.124746 | 0.219239 | -5.81975 |
| SH3TC2     | 0.977698 | 1.734934 | 1.541343 | 0.124835 | 0.219367 | -5.11747 |
| C9orf119   | 0.304963 | 3.437251 | 1.541157 | 0.12488  | 0.219368 | -5.52609 |
| SH3KBP1    | 0.607005 | 5.375996 | 1.541158 | 0.12488  | 0.219368 | -5.83443 |
| EMD        | 0.252711 | 5.494694 | 1.541147 | 0.124882 | 0.219368 | -5.88213 |
| KIAA1539   | -0.36014 | 4.623206 | -1.54081 | 0.124964 | 0.219484 | -5.84881 |
| COL22A1    | 1.514209 | 0.899086 | 1.540344 | 0.125078 | 0.219617 | -4.93987 |
| PLCH2      | 1.551158 | 3.391539 | 1.540363 | 0.125073 | 0.219617 | -5.30046 |
| LOX        | 0.729377 | 5.065873 | 1.540307 | 0.125087 | 0.219617 | -5.78248 |
| MYL12B     | 0.365559 | 7.94933  | 1.539787 | 0.125213 | 0.219784 | -5.93386 |
| ARID2      | -0.24483 | 5.907204 | -1.53984 | 0.125202 | 0.219784 | -5.93872 |
| ARHGEF16   | 0.579822 | 5.080805 | 1.539459 | 0.125294 | 0.219897 | -5.8018  |
| CUTC       | -0.23644 | 3.111785 | -1.53933 | 0.125325 | 0.219924 | -5.56332 |
| SLK        | -0.35491 | 7.184491 | -1.53904 | 0.125396 | 0.220022 | -5.93786 |
| CA5BP      | 0.298682 | 3.79066  | 1.538503 | 0.125527 | 0.220143 | -5.6092  |
| HARS2      | -0.19485 | 4.54409  | -1.5386  | 0.125502 | 0.220143 | -5.8255  |
| RAVER2     | -0.36683 | 5.138701 | -1.5385  | 0.125528 | 0.220143 | -5.90297 |
| FZD5       | -0.65491 | 5.461489 | -1.53866 | 0.125488 | 0.220143 | -5.93668 |
| TMEM200A   | -0.69723 | 2.345375 | -1.53809 | 0.125627 | 0.220289 | -5.4815  |
| CUL3       | -0.21541 | 6.343777 | -1.53776 | 0.125709 | 0.220405 | -5.95082 |
| FAM83D     | 0.512461 | 5.86874  | 1.537684 | 0.125727 | 0.220409 | -5.90057 |
| PPP1R3D    | 0.303608 | 4.375679 | 1.537224 | 0.12584  | 0.220578 | -5.73523 |
| C1orf27    | -0.28448 | 5.015642 | -1.53713 | 0.125861 | 0.220589 | -5.88743 |
| MIER3      | -0.27353 | 5.023726 | -1.53704 | 0.125885 | 0.220603 | -5.88782 |
| NCSTN      | 0.194272 | 7.396691 | 1.536787 | 0.125946 | 0.220683 | -5.94679 |
| CDIPT      | -0.23087 | 6.232991 | -1.53667 | 0.125975 | 0.220706 | -5.95125 |
| C16orf72   | -0.22667 | 6.046966 | -1.53597 | 0.126147 | 0.220979 | -5.94831 |
| LIPT2      | 0.536438 | 1.230204 | 1.535832 | 0.126181 | 0.22101  | -5.10722 |
| SKAP1      | 1.121438 | 1.323748 | 1.535675 | 0.126219 | 0.221022 | -5.04659 |
| GBP3       | 0.762529 | 4.756189 | 1.535735 | 0.126204 | 0.221022 | -5.72636 |
| SUV420H1   | -0.26151 | 5.609693 | -1.53528 | 0.126316 | 0.221164 | -5.93331 |
| FBXO46     | 0.252611 | 5.211406 | 1.534135 | 0.126597 | 0.221629 | -5.86362 |
| CBFA2T2    | 0.288263 | 5.774094 | 1.533735 | 0.126696 | 0.221773 | -5.91436 |
| B4GALT4    | 0.46945  | 5.465475 | 1.533101 | 0.126852 | 0.222019 | -5.87164 |
| GVIN1      | -0.66028 | 1.657596 | -1.53213 | 0.127092 | 0.222382 | -5.35319 |
| AAMP       | -0.19757 | 6.29452  | -1.53213 | 0.12709  | 0.222382 | -5.9586  |
| FLJ10213   | -0.37909 | 0.819142 | -1.53191 | 0.127147 | 0.222403 | -5.17414 |
| APOL1      | 0.66803  | 6.563444 | 1.531887 | 0.127151 | 0.222403 | -5.9438  |
| CREG1      | 0.33706  | 7.372205 | 1.53201  | 0.127121 | 0.222403 | -5.95662 |
| RASGRP4    | -0.56041 | 0.088956 | -1.53108 | 0.127349 | 0.222722 | -5.09081 |
| SLC39A6    | 0.490326 | 6.407191 | 1.530713 | 0.127441 | 0.222854 | -5.94616 |
| FGFR4      | 1.438731 | 4.042531 | 1.530602 | 0.127469 | 0.222875 | -5.44484 |
| XRN1       | 0.300654 | 6.308345 | 1.53029  | 0.127546 | 0.222982 | -5.9499  |
| SORBS3     | -0.33206 | 6.014499 | -1.52962 | 0.127712 | 0.223244 | -5.9594  |
| RPS3       | 0.365615 | 9.462481 | 1.529057 | 0.127851 | 0.223459 | -5.90192 |
| OAZ2       | -0.19238 | 5.426136 | -1.52867 | 0.127948 | 0.223601 | -5.9282  |
| C20orf151  | 0.987618 | 1.724619 | 1.528275 | 0.128045 | 0.223742 | -5.13113 |
| ASPN       | 0.921709 | 3.963235 | 1.527304 | 0.128286 | 0.224135 | -5.54281 |
| ARSI       | 1.283276 | 2.12615  | 1.527192 | 0.128314 | 0.224156 | -5.15739 |
| C19orf57   | 0.591681 | 1.348309 | 1.526911 | 0.128384 | 0.2242   | -5.13283 |
| PLEKHB1    | -1.06161 | 2.81557  | -1.52685 | 0.128399 | 0.2242   | -5.67284 |
| MRPL52     | 0.30685  | 4.43692  | 1.526963 | 0.128371 | 0.2242   | -5.7595  |
| ABCC5      | -0.70077 | 6.662958 | -1.52683 | 0.128403 | 0.2242   | -5.96047 |
| LOC151534  | 0.664454 | 3.360296 | 1.526451 | 0.128498 | 0.224332 | -5.45664 |

|          |          |          |          |          |          |          |
|----------|----------|----------|----------|----------|----------|----------|
| CNOT4    | -0.17157 | 4.780724 | -1.5264  | 0.128511 | 0.224332 | -5.86956 |
| TRMT2A   | 0.244031 | 4.310398 | 1.525957 | 0.128621 | 0.224496 | -5.74834 |
| DNAJC5   | -0.25212 | 7.138404 | -1.52501 | 0.128857 | 0.22488  | -5.96194 |
| RG9MTD1  | 0.278069 | 4.627454 | 1.524534 | 0.128976 | 0.225059 | -5.80116 |
| TLR3     | -0.55226 | 2.946542 | -1.52444 | 0.129    | 0.225074 | -5.6104  |
| LCORL    | -0.2997  | 2.652202 | -1.52433 | 0.129027 | 0.225092 | -5.49645 |
| C10orf41 | -0.57102 | 1.435046 | -1.52409 | 0.129086 | 0.225167 | -5.31545 |
| HS6ST1   | 0.477389 | 5.92485  | 1.52331  | 0.129281 | 0.225456 | -5.92862 |
| ARHGAP21 | -0.32281 | 7.050485 | -1.5233  | 0.129284 | 0.225456 | -5.96497 |
| RPS24    | 0.315436 | 8.622751 | 1.523178 | 0.129314 | 0.225481 | -5.93848 |
| CHM      | -0.27218 | 5.093477 | -1.52258 | 0.129463 | 0.225713 | -5.91597 |
| HOXB2    | 0.760192 | 3.262859 | 1.522145 | 0.129573 | 0.225876 | -5.43414 |
| MYC      | 0.451217 | 7.39101  | 1.522017 | 0.129605 | 0.225903 | -5.97288 |
| LZTS1    | 0.70736  | 3.392063 | 1.52175  | 0.129672 | 0.225992 | -5.47004 |
| SH3RF2   | -0.64891 | 5.561036 | -1.52147 | 0.129742 | 0.226086 | -5.96614 |
| HSD17B1  | 0.852843 | 1.634989 | 1.521249 | 0.129797 | 0.226126 | -5.14887 |
| FTL      | 0.439552 | 10.52125 | 1.521279 | 0.12979  | 0.226126 | -5.8797  |
| MAST2    | 0.285395 | 6.397202 | 1.521184 | 0.129814 | 0.226126 | -5.96736 |
| IFRD1    | -0.34155 | 5.409158 | -1.52109 | 0.129837 | 0.226139 | -5.9471  |
| ARHGAP42 | -0.63294 | 3.452696 | -1.5209  | 0.129885 | 0.226174 | -5.73376 |
| ERC1     | -0.34755 | 6.542421 | -1.52088 | 0.12989  | 0.226174 | -5.97628 |
| KCNS3    | 0.969728 | 3.504768 | 1.520488 | 0.129988 | 0.226287 | -5.44788 |
| PHKG2    | 0.235184 | 4.598249 | 1.520506 | 0.129984 | 0.226287 | -5.80761 |
| RANBP10  | -0.1964  | 5.177411 | -1.52043 | 0.130003 | 0.226287 | -5.92086 |
| UBE2E3   | 0.20895  | 5.836311 | 1.519872 | 0.130143 | 0.226502 | -5.94491 |
| PPP2R2A  | 0.283506 | 6.03478  | 1.518464 | 0.130497 | 0.22709  | -5.9554  |
| CNO      | 0.263529 | 3.547643 | 1.517778 | 0.13067  | 0.227363 | -5.59361 |
| TRAF5    | -0.48639 | 4.364028 | -1.51729 | 0.130794 | 0.22755  | -5.86701 |
| PTGS2    | 1.090647 | 4.181351 | 1.517202 | 0.130815 | 0.227559 | -5.57284 |
| PCBP2    | -0.19345 | 8.369238 | -1.51624 | 0.131058 | 0.227953 | -5.94208 |
| TTC39A   | -0.76654 | 3.920708 | -1.51599 | 0.131121 | 0.228034 | -5.83993 |
| CPPED1   | -0.45968 | 4.371369 | -1.51579 | 0.131173 | 0.228095 | -5.868   |
| LOC90834 | -0.37764 | 1.044435 | -1.51549 | 0.131248 | 0.22816  | -5.23289 |
| NKD1     | -0.81607 | 1.555634 | -1.51553 | 0.131237 | 0.22816  | -5.38642 |
| KLHL21   | -0.34791 | 6.57615  | -1.51545 | 0.131259 | 0.22816  | -5.98408 |
| LASS5    | 0.2062   | 4.892207 | 1.515118 | 0.131342 | 0.228276 | -5.86026 |
| MRPS16   | 0.230843 | 5.967249 | 1.513857 | 0.131661 | 0.228802 | -5.961   |
| ASPRV1   | -0.60548 | 1.24725  | -1.51366 | 0.131712 | 0.228862 | -5.30433 |
| SNX15    | -0.25329 | 4.371948 | -1.51358 | 0.131731 | 0.228867 | -5.84774 |
| MMAA     | -0.28992 | 3.484972 | -1.5135  | 0.131753 | 0.228876 | -5.69392 |
| ATXN7L1  | -0.2736  | 3.860493 | -1.51341 | 0.131775 | 0.228885 | -5.7686  |
| AQP11    | -0.56535 | 0.172378 | -1.51313 | 0.131846 | 0.228981 | -5.12743 |
| IL1B     | 1.153899 | 3.482231 | 1.512906 | 0.131903 | 0.229043 | -5.41611 |
| DYNC2H1  | -0.5886  | 3.379743 | -1.51286 | 0.131915 | 0.229043 | -5.73187 |
| TMEM173  | 0.455411 | 4.553296 | 1.512711 | 0.131952 | 0.22908  | -5.78017 |
| MFHAS1   | 0.430839 | 5.794214 | 1.51157  | 0.132242 | 0.229555 | -5.93875 |
| DSC3     | 3.32907  | 5.99401  | 1.511365 | 0.132294 | 0.229596 | -5.52617 |
| SLC15A3  | 0.576342 | 4.339521 | 1.511314 | 0.132307 | 0.229596 | -5.71698 |
| UBE2O    | 0.234172 | 5.98336  | 1.511257 | 0.132322 | 0.229596 | -5.96573 |
| SUDS3    | -0.212   | 5.805422 | -1.51122 | 0.132332 | 0.229596 | -5.97677 |
| NFXL1    | 0.295021 | 3.893925 | 1.51104  | 0.132377 | 0.229647 | -5.6736  |
| FH       | -0.22298 | 5.971201 | -1.51074 | 0.132455 | 0.229752 | -5.98402 |
| RNF40    | 0.192095 | 6.882818 | 1.5104   | 0.13254  | 0.229873 | -5.99268 |
| CAMKK1   | 0.478856 | 3.39084  | 1.509901 | 0.132668 | 0.230065 | -5.53113 |
| TRIT1    | 0.50958  | 3.920321 | 1.50927  | 0.132829 | 0.230258 | -5.64178 |
| C2CD2L   | -0.31018 | 3.939877 | -1.50933 | 0.132813 | 0.230258 | -5.79554 |
| SCAMP4   | 0.231518 | 6.450874 | 1.509379 | 0.132801 | 0.230258 | -5.98807 |
| GTPBP10  | 0.341827 | 4.381132 | 1.509129 | 0.132865 | 0.230292 | -5.76997 |

|          |          |          |          |          |          |          |
|----------|----------|----------|----------|----------|----------|----------|
| MRC1     | -0.74587 | 2.921433 | -1.50767 | 0.133236 | 0.230908 | -5.66692 |
| CCDC53   | -0.25885 | 4.111567 | -1.50747 | 0.133289 | 0.23097  | -5.82002 |
| RAET1G   | 1.230007 | 0.287795 | 1.507308 | 0.13333  | 0.231013 | -4.97571 |
| KLHL25   | -0.36949 | 4.154885 | -1.50649 | 0.13354  | 0.231349 | -5.84207 |
| SLC36A1  | 0.343444 | 4.921997 | 1.506386 | 0.133566 | 0.231365 | -5.86143 |
| NCEH1    | 0.559738 | 5.69267  | 1.505624 | 0.133762 | 0.231675 | -5.92683 |
| CAPZB    | 0.193593 | 7.840327 | 1.505426 | 0.133813 | 0.231734 | -5.98455 |
| MAMSTR   | 0.49531  | 0.435156 | 1.505137 | 0.133887 | 0.231788 | -5.04838 |
| TRIM52   | -0.32586 | 2.874125 | -1.50507 | 0.133904 | 0.231788 | -5.57849 |
| MYPOP    | 0.241046 | 3.645281 | 1.505029 | 0.133915 | 0.231788 | -5.6387  |
| PFAS     | 0.306405 | 4.969122 | 1.504983 | 0.133927 | 0.231788 | -5.8731  |
| ASS1     | 0.801763 | 6.13585  | 1.505083 | 0.133901 | 0.231788 | -5.94852 |
| STRADA   | -0.22492 | 4.450839 | -1.50453 | 0.134043 | 0.231961 | -5.86812 |
| C7orf36  | 0.326207 | 3.228281 | 1.503861 | 0.134215 | 0.232229 | -5.5322  |
| CNNM4    | 0.407535 | 5.654119 | 1.503503 | 0.134307 | 0.23236  | -5.9398  |
| GNS      | -0.29075 | 7.538181 | -1.50336 | 0.134345 | 0.232397 | -5.98448 |
| TMEM136  | -0.4325  | 1.315898 | -1.50314 | 0.134401 | 0.232465 | -5.30495 |
| SARNP    | 0.199974 | 4.887476 | 1.503059 | 0.134422 | 0.232472 | -5.87815 |
| HCG26    | 0.645075 | 1.278389 | 1.502397 | 0.134592 | 0.232628 | -5.14923 |
| ADAL     | -0.29562 | 2.595682 | -1.50242 | 0.134587 | 0.232628 | -5.51679 |
| KCTD14   | -0.87852 | 2.588493 | -1.50256 | 0.13455  | 0.232628 | -5.61718 |
| KDM3A    | 0.25206  | 6.152209 | 1.502583 | 0.134545 | 0.232628 | -5.98663 |
| SKIV2L2  | -0.19183 | 5.889405 | -1.50239 | 0.134595 | 0.232628 | -5.99265 |
| PET112L  | -0.26044 | 3.736281 | -1.50208 | 0.134674 | 0.232735 | -5.7599  |
| WDR45L   | 0.209988 | 6.700509 | 1.501807 | 0.134745 | 0.2328   | -6.00442 |
| FAM20B   | -0.28053 | 6.432276 | -1.50186 | 0.134732 | 0.2328   | -6.00543 |
| PGLS     | 0.310381 | 5.503423 | 1.501664 | 0.134782 | 0.232835 | -5.93714 |
| ENDOG    | -0.34691 | 3.349742 | -1.50159 | 0.1348   | 0.232837 | -5.69207 |
| ZAK      | -0.4538  | 6.561711 | -1.50135 | 0.134863 | 0.232917 | -6.00406 |
| RBM8A    | 0.211511 | 6.273543 | 1.500845 | 0.134993 | 0.233114 | -5.99582 |
| TNFSF15  | 0.924654 | 1.06309  | 1.500702 | 0.13503  | 0.23312  | -5.08498 |
| DEF6     | 0.433846 | 4.412538 | 1.500727 | 0.135024 | 0.23312  | -5.77054 |
| SLAH2    | 0.397961 | 6.079309 | 1.500577 | 0.135063 | 0.233147 | -5.97844 |
| LRTOMT   | -0.36945 | 2.858232 | -1.50041 | 0.135105 | 0.233188 | -5.58984 |
| PAIP1    | 0.28186  | 4.977399 | 1.500356 | 0.13512  | 0.233188 | -5.88404 |
| BIRC6    | -0.22632 | 7.395318 | -1.50002 | 0.135206 | 0.233308 | -5.99424 |
| VPS33A   | 0.186061 | 4.856736 | 1.499433 | 0.135359 | 0.233543 | -5.88098 |
| OTUB2    | 0.629457 | 2.762391 | 1.499314 | 0.13539  | 0.233568 | -5.39431 |
| KIAA2013 | 0.252701 | 6.596002 | 1.499217 | 0.135415 | 0.233582 | -6.00605 |
| PNMAL2   | -0.64011 | 0.155905 | -1.49875 | 0.135536 | 0.233763 | -5.1586  |
| CARS     | -0.21969 | 5.530786 | -1.49867 | 0.135557 | 0.23377  | -5.9814  |
| CCDC78   | 0.735945 | -0.0192  | 1.498199 | 0.135679 | 0.233951 | -4.98664 |
| S1PR2    | -0.34373 | 2.888055 | -1.49799 | 0.135732 | 0.234015 | -5.59732 |
| SF3B2    | 0.173127 | 7.543232 | 1.497753 | 0.135795 | 0.234093 | -6.00203 |
| INO80B   | 0.291519 | 3.814487 | 1.49738  | 0.135892 | 0.234231 | -5.67692 |
| YLPM1    | -0.21116 | 6.415345 | -1.4972  | 0.135937 | 0.234281 | -6.01212 |
| PLEK     | 0.768383 | 3.15633  | 1.497057 | 0.135975 | 0.234289 | -5.44896 |
| TNIK     | -0.77661 | 3.804345 | -1.49711 | 0.135961 | 0.234289 | -5.85508 |
| SARS2    | 0.298025 | 4.478068 | 1.496883 | 0.136021 | 0.234338 | -5.81359 |
| TTC39B   | -0.39157 | 3.556592 | -1.49677 | 0.136051 | 0.234361 | -5.75295 |
| ZNF284   | -0.48514 | 0.838387 | -1.4967  | 0.136069 | 0.234363 | -5.24316 |
| C10orf35 | 0.62919  | 1.720673 | 1.496523 | 0.136114 | 0.234411 | -5.22745 |
| TADA2A   | 0.241076 | 3.044696 | 1.496462 | 0.13613  | 0.234411 | -5.52117 |
| PCDHB14  | 0.625721 | 2.775406 | 1.496254 | 0.136184 | 0.234475 | -5.40567 |
| FLI1     | -0.43701 | 3.11276  | -1.49589 | 0.136279 | 0.234609 | -5.66919 |
| LY6K     | 1.741082 | 2.242474 | 1.495565 | 0.136364 | 0.234726 | -5.15869 |
| MBD3     | -0.23999 | 6.017757 | -1.49548 | 0.136385 | 0.234734 | -6.00841 |
| CAPNS2   | 2.166841 | 0.417504 | 1.495342 | 0.136422 | 0.234769 | -4.99356 |



|              |          |          |          |          |          |          |
|--------------|----------|----------|----------|----------|----------|----------|
| TXNL1        | -0.23535 | 5.483536 | -1.49497 | 0.136519 | 0.234907 | -5.98499 |
| SKIL         | 0.419779 | 5.768344 | 1.49458  | 0.136621 | 0.235053 | -5.96253 |
| RBMS2        | -0.35594 | 5.722344 | -1.49444 | 0.136657 | 0.235087 | -6.00344 |
| USP38        | -0.24429 | 5.75499  | -1.49428 | 0.136698 | 0.235128 | -6.00094 |
| RAB20        | -0.54204 | 3.567745 | -1.49404 | 0.136763 | 0.235211 | -5.78237 |
| ACOT2        | -0.39193 | 2.732539 | -1.49387 | 0.136807 | 0.235257 | -5.57885 |
| IGFBP4       | -0.49004 | 8.134401 | -1.49374 | 0.13684  | 0.235285 | -5.97451 |
| BAHCC1       | -0.50279 | 4.860114 | -1.49358 | 0.136882 | 0.235328 | -5.95658 |
| KCNK1        | 0.662876 | 5.292511 | 1.493182 | 0.136986 | 0.235478 | -5.88902 |
| INSIG2       | -0.27371 | 4.56367  | -1.49294 | 0.137049 | 0.235557 | -5.90387 |
| MFNG         | -0.50892 | 2.296853 | -1.49234 | 0.137205 | 0.235798 | -5.51143 |
| ROBO2        | 1.147737 | 1.534674 | 1.491681 | 0.137379 | 0.236029 | -5.13904 |
| CARD10       | 0.539385 | 5.377372 | 1.491635 | 0.137391 | 0.236029 | -5.91603 |
| ICK          | -0.38283 | 5.863558 | -1.49165 | 0.137388 | 0.236029 | -6.01322 |
| COG7         | -0.20279 | 4.990321 | -1.49077 | 0.137618 | 0.23639  | -5.94754 |
| WASF2        | -0.29751 | 8.150459 | -1.49018 | 0.137773 | 0.236627 | -5.98515 |
| WNT5B        | -0.59428 | 2.564334 | -1.48982 | 0.137867 | 0.23676  | -5.58977 |
| APLNR        | 0.848746 | 3.77645  | 1.489653 | 0.137911 | 0.236761 | -5.56959 |
| MMGT1        | -0.21408 | 5.826923 | -1.4897  | 0.1379   | 0.236761 | -6.00967 |
| CAPZA2       | -0.24999 | 6.670332 | -1.48963 | 0.137918 | 0.236761 | -6.02236 |
| NEDD4        | 0.373374 | 4.972348 | 1.489481 | 0.137956 | 0.236797 | -5.88897 |
| SRGAP1       | 0.400319 | 4.958932 | 1.489415 | 0.137974 | 0.236798 | -5.88415 |
| RAB23        | -0.36033 | 4.580696 | -1.48929 | 0.138007 | 0.236826 | -5.92183 |
| FAM164A      | -0.43406 | 3.201265 | -1.48893 | 0.138102 | 0.23696  | -5.70162 |
| FUT6         | 2.0053   | 2.051135 | 1.488606 | 0.138187 | 0.237076 | -5.10295 |
| TRNT1        | -0.25444 | 3.558886 | -1.48836 | 0.138252 | 0.237153 | -5.73952 |
| TPP1         | 0.249534 | 8.037634 | 1.488307 | 0.138266 | 0.237153 | -6.00616 |
| LUZP6        | 0.259985 | 7.545061 | 1.488185 | 0.138298 | 0.237179 | -6.01764 |
| ZFP36L2      | -0.42119 | 8.464047 | -1.48808 | 0.138325 | 0.237196 | -5.97334 |
| PCDH17       | 0.619721 | 3.614977 | 1.487978 | 0.138352 | 0.237214 | -5.58007 |
| PPP1R3F      | -0.44936 | 1.4031   | -1.4875  | 0.138479 | 0.23738  | -5.34695 |
| GMPR2        | -0.19665 | 4.987797 | -1.48748 | 0.138483 | 0.23738  | -5.9517  |
| COQ3         | 0.311896 | 2.781574 | 1.486552 | 0.138728 | 0.237772 | -5.46882 |
| SPRY2        | -0.47948 | 4.410422 | -1.48633 | 0.138788 | 0.237816 | -5.91715 |
| GCC1         | -0.20523 | 4.854729 | -1.48637 | 0.138776 | 0.237816 | -5.9402  |
| DNM3         | -0.61738 | 1.527185 | -1.48623 | 0.138815 | 0.237832 | -5.39038 |
| HLTF         | 0.513323 | 5.634215 | 1.486157 | 0.138833 | 0.237834 | -5.95456 |
| SELE         | 1.291275 | 2.052602 | 1.485153 | 0.139098 | 0.238259 | -5.20725 |
| AMDHD2       | 0.300727 | 2.920299 | 1.48494  | 0.139155 | 0.238313 | -5.50048 |
| NARS         | -0.26302 | 7.294415 | -1.48491 | 0.139164 | 0.238313 | -6.01803 |
| GUSBP3       | -0.37073 | 1.111811 | -1.48479 | 0.139194 | 0.238336 | -5.28816 |
| COX7B        | -0.32129 | 6.531396 | -1.48439 | 0.139301 | 0.23849  | -6.03071 |
| TGFBR1       | -0.32553 | 6.433365 | -1.48418 | 0.139357 | 0.238556 | -6.03146 |
| ARMC10       | 0.260972 | 4.992301 | 1.483977 | 0.13941  | 0.238617 | -5.91227 |
| KIAA1033     | 0.223074 | 6.167658 | 1.483903 | 0.139429 | 0.238622 | -6.01601 |
| GXYLT2       | -0.79153 | 1.610382 | -1.48365 | 0.139495 | 0.238705 | -5.43791 |
| TMED7-TICAM2 | 1.133576 | 2.109682 | 1.483474 | 0.139543 | 0.238723 | -5.23779 |
| RPL7         | 0.693804 | 3.761878 | 1.483448 | 0.13955  | 0.238723 | -5.60718 |
| DNAJB12      | -0.19158 | 5.602308 | -1.48342 | 0.139557 | 0.238723 | -6.00678 |
| EPHB1        | 1.10614  | 1.026077 | 1.483296 | 0.13959  | 0.23875  | -5.08843 |
| LRR45        | 0.281029 | 4.214855 | 1.48317  | 0.139624 | 0.23875  | -5.78478 |
| OSMR         | 0.509159 | 6.336247 | 1.483205 | 0.139614 | 0.23875  | -6.01267 |
| NOD2         | 1.019517 | 2.930006 | 1.482785 | 0.139726 | 0.238895 | -5.3893  |
| C1QL1        | -0.72799 | 0.851923 | -1.48263 | 0.139766 | 0.238906 | -5.30204 |
| PPP2R5B      | -0.2907  | 4.093667 | -1.48267 | 0.139756 | 0.238906 | -5.85799 |
| ZBTB22       | -0.24354 | 4.030301 | -1.48242 | 0.139824 | 0.238916 | -5.84144 |
| ARRDC2       | -0.3306  | 4.605831 | -1.48233 | 0.139847 | 0.238916 | -5.93064 |
| RPL17        | -0.40593 | 4.880662 | -1.48229 | 0.139858 | 0.238916 | -5.96698 |

|          |          |          |          |          |          |          |
|----------|----------|----------|----------|----------|----------|----------|
| RBM38    | 0.352202 | 5.665817 | 1.482476 | 0.139808 | 0.238916 | -5.97718 |
| CDV3     | -0.2099  | 7.584749 | -1.48251 | 0.139798 | 0.238916 | -6.01587 |
| FAM82A1  | -0.37674 | 1.460806 | -1.4821  | 0.139907 | 0.238971 | -5.35144 |
| COX15    | -0.19442 | 5.767734 | -1.48197 | 0.139942 | 0.239002 | -6.0176  |
| AXIN2    | -0.7378  | 3.527415 | -1.48181 | 0.139986 | 0.239022 | -5.82884 |
| CNOT6    | 0.239324 | 5.934571 | 1.481797 | 0.139989 | 0.239022 | -6.00601 |
| CCDC144B | -0.84565 | 0.703251 | -1.48117 | 0.140156 | 0.239278 | -5.29438 |
| LTBP1    | -0.61963 | 6.466863 | -1.48111 | 0.140173 | 0.239278 | -6.03293 |
| IGSF11   | -1.09083 | 0.0171   | -1.47978 | 0.140525 | 0.239851 | -5.22987 |
| ANXA8    | 3.519056 | 4.098692 | 1.479585 | 0.140578 | 0.239911 | -5.2175  |
| RPL13P5  | 0.375549 | 0.630215 | 1.479071 | 0.140715 | 0.240116 | -5.12478 |
| TRPV3    | 1.055183 | 0.977598 | 1.478841 | 0.140777 | 0.240162 | -5.09004 |
| MPZL1    | 0.201074 | 7.547158 | 1.478861 | 0.140771 | 0.240162 | -6.03021 |
| LOC90110 | -0.27562 | 3.114313 | -1.47818 | 0.140954 | 0.240382 | -5.66197 |
| SNUPN    | 0.232418 | 4.051836 | 1.478237 | 0.140938 | 0.240382 | -5.76776 |
| C9orf125 | -0.60506 | 4.537872 | -1.47817 | 0.140957 | 0.240382 | -5.95574 |
| UEVLD    | -0.22904 | 4.082104 | -1.47783 | 0.141046 | 0.240504 | -5.85473 |
| TBP      | 0.186889 | 3.700537 | 1.477259 | 0.1412   | 0.240737 | -5.70141 |
| ARTN     | 1.358907 | 1.458793 | 1.476967 | 0.141278 | 0.240812 | -5.1228  |
| GHDC     | -0.35508 | 4.536514 | -1.47701 | 0.141265 | 0.240812 | -5.93232 |
| KLK7     | 2.601392 | 3.423311 | 1.476482 | 0.141408 | 0.241004 | -5.24318 |
| TMTCC3   | 0.437311 | 6.050862 | 1.473946 | 0.142089 | 0.242135 | -6.01351 |
| SFXN5    | -0.29808 | 3.706546 | -1.47319 | 0.142293 | 0.242453 | -5.80209 |
| PARD6A   | -0.575   | 1.02645  | -1.47227 | 0.14254  | 0.242844 | -5.32103 |
| SEMA3C   | -0.65799 | 6.263334 | -1.47206 | 0.142598 | 0.242914 | -6.04803 |
| CXXC5    | -0.46325 | 4.107651 | -1.47143 | 0.142766 | 0.243141 | -5.89834 |
| BLMH     | 0.427467 | 5.209132 | 1.471472 | 0.142756 | 0.243141 | -5.93899 |
| ZNF689   | -0.27593 | 3.103921 | -1.47125 | 0.142816 | 0.243167 | -5.67012 |
| UCHL5    | 0.239668 | 4.768781 | 1.471253 | 0.142815 | 0.243167 | -5.90474 |
| STX5     | -0.1908  | 5.29546  | -1.47115 | 0.142842 | 0.243182 | -6.00293 |
| WHAMM    | -0.20187 | 4.102697 | -1.47069 | 0.142967 | 0.243335 | -5.86452 |
| CCAR1    | 0.193908 | 6.347089 | 1.470733 | 0.142955 | 0.243335 | -6.04296 |
| TRERF1   | 0.478472 | 5.035488 | 1.469731 | 0.143226 | 0.243717 | -5.91394 |
| NUP88    | 0.208364 | 5.514951 | 1.469792 | 0.14321  | 0.243717 | -5.99349 |
| TIPARP   | -0.39681 | 5.807827 | -1.46963 | 0.143253 | 0.243733 | -6.04406 |
| FOXA3    | -1.40567 | 1.446835 | -1.46952 | 0.143284 | 0.243756 | -5.51166 |
| XPNPEP1  | 0.249888 | 6.160837 | 1.469008 | 0.143422 | 0.243961 | -6.03631 |
| UQCC     | -0.23418 | 5.128437 | -1.46831 | 0.143612 | 0.244195 | -5.99624 |
| STK11    | -0.27399 | 5.814439 | -1.46837 | 0.143596 | 0.244195 | -6.04238 |
| RXRA     | -0.36134 | 6.879483 | -1.46843 | 0.14358  | 0.244195 | -6.04864 |
| VSNL1    | 1.998537 | 3.930713 | 1.468193 | 0.143643 | 0.244218 | -5.43103 |
| HSF1     | 0.289021 | 6.83758  | 1.468057 | 0.14368  | 0.244251 | -6.05447 |
| MED25    | -0.21989 | 6.446213 | -1.46793 | 0.143715 | 0.24428  | -6.05512 |
| NINJ1    | 0.390815 | 5.292919 | 1.467432 | 0.14385  | 0.24448  | -5.9577  |
| ARHGAP23 | 0.598805 | 6.957482 | 1.467113 | 0.143937 | 0.244598 | -6.05351 |
| TMEM117  | 0.389298 | 3.803846 | 1.466977 | 0.143973 | 0.244631 | -5.70214 |
| MR1      | 0.38727  | 3.19457  | 1.466748 | 0.144036 | 0.244707 | -5.56972 |
| ZNF438   | -0.29714 | 3.220096 | -1.4665  | 0.144103 | 0.244791 | -5.70725 |
| FAM83F   | 0.845091 | 3.926919 | 1.466314 | 0.144154 | 0.244821 | -5.63074 |
| GPR116   | -0.48509 | 4.690438 | -1.46631 | 0.144155 | 0.244821 | -5.97792 |
| VHL      | 0.27951  | 5.517442 | 1.466234 | 0.144175 | 0.244825 | -5.99285 |
| PDK1     | -0.33797 | 5.069062 | -1.46575 | 0.144307 | 0.245018 | -6.00289 |
| STXBP2   | 0.31518  | 6.268107 | 1.46568  | 0.144326 | 0.245021 | -6.04308 |
| RBM10    | 0.175789 | 5.953338 | 1.464458 | 0.144659 | 0.245557 | -6.03577 |
| DCI      | -0.26205 | 4.836192 | -1.46386 | 0.144824 | 0.245806 | -5.97636 |
| JARID2   | 0.407669 | 5.437169 | 1.463676 | 0.144873 | 0.24586  | -5.97753 |
| DOCK11   | -0.52236 | 4.191652 | -1.46315 | 0.145016 | 0.246072 | -5.93035 |
| SLC36A4  | -0.37378 | 3.321763 | -1.46262 | 0.145162 | 0.24629  | -5.75093 |

|              |          |          |          |          |          |          |
|--------------|----------|----------|----------|----------|----------|----------|
| USMG5        | -0.28267 | 5.463846 | -1.4623  | 0.145249 | 0.246409 | -6.03388 |
| SIDT1        | -0.75531 | 1.997169 | -1.4622  | 0.145275 | 0.246409 | -5.53306 |
| CDCA7L       | 0.448846 | 4.953062 | 1.462159 | 0.145288 | 0.246409 | -5.91691 |
| ARHGEF5      | 0.513965 | 5.396182 | 1.462105 | 0.145302 | 0.246409 | -5.96427 |
| MUC15        | -1.26269 | 0.683    | -1.46169 | 0.145415 | 0.24654  | -5.38506 |
| SCAND1       | 0.307485 | 5.339651 | 1.461711 | 0.14541  | 0.24654  | -5.9791  |
| PISD         | 0.200253 | 4.785441 | 1.461476 | 0.145475 | 0.246612 | -5.92544 |
| TMEM71       | -0.63529 | 0.10412  | -1.46119 | 0.145554 | 0.246716 | -5.20383 |
| RIMBP3       | 0.685799 | 0.238831 | 1.461086 | 0.145581 | 0.246733 | -5.06326 |
| TM9SF1       | 0.211331 | 6.218935 | 1.46101  | 0.145602 | 0.246738 | -6.05188 |
| PDCD2        | 0.247903 | 5.069205 | 1.460828 | 0.145652 | 0.246793 | -5.95627 |
| CPSF1        | 0.259715 | 6.9748   | 1.460438 | 0.145759 | 0.246944 | -6.06587 |
| LOC100128292 | 0.391069 | 0.029151 | 1.460274 | 0.145804 | 0.246991 | -5.07113 |
| SLC35A1      | -0.35362 | 3.984543 | -1.46018 | 0.145831 | 0.247006 | -5.88078 |
| PEX2         | -0.2094  | 5.168542 | -1.46001 | 0.145877 | 0.247053 | -6.00968 |
| SPNS2        | -0.7947  | 5.158993 | -1.45977 | 0.145943 | 0.247136 | -6.0448  |
| ZNF275       | -0.31241 | 5.124617 | -1.45941 | 0.146041 | 0.247272 | -6.01485 |
| KPNA4        | 0.242071 | 7.162946 | 1.458694 | 0.146238 | 0.247576 | -6.0667  |
| AVEN         | -0.2675  | 3.18951  | -1.45798 | 0.146436 | 0.24788  | -5.70561 |
| GDI2         | 0.219951 | 7.875299 | 1.457865 | 0.146467 | 0.247902 | -6.05384 |
| RPTOR        | -0.21028 | 6.002473 | -1.45775 | 0.146499 | 0.247915 | -6.0623  |
| UFM1         | -0.25632 | 6.173475 | -1.45771 | 0.14651  | 0.247915 | -6.06731 |
| ITPKA        | -0.67874 | 2.171282 | -1.45745 | 0.146582 | 0.248008 | -5.55417 |
| PADI2        | 1.329448 | 2.800231 | 1.456851 | 0.146746 | 0.248255 | -5.35369 |
| ORAI1        | 0.284367 | 4.958967 | 1.45669  | 0.14679  | 0.2483   | -5.94488 |
| YIPF6        | -0.23477 | 4.129879 | -1.45651 | 0.146841 | 0.248355 | -5.89356 |
| FAM78A       | 0.509447 | 2.319251 | 1.456105 | 0.146952 | 0.248513 | -5.3995  |
| CPNE5        | -0.54786 | 2.269751 | -1.45565 | 0.147077 | 0.248663 | -5.56297 |
| KBTBD7       | -0.28907 | 3.360878 | -1.45571 | 0.147061 | 0.248663 | -5.7491  |
| BACH2        | -0.63323 | 2.177142 | -1.45556 | 0.147103 | 0.248679 | -5.56394 |
| ACAD11       | -0.3326  | 3.891198 | -1.45525 | 0.147189 | 0.248792 | -5.87155 |
| TERF2IP      | -0.22204 | 5.770945 | -1.45487 | 0.147294 | 0.24894  | -6.05826 |
| WDR78        | -0.54858 | 0.028091 | -1.45464 | 0.147357 | 0.248987 | -5.18846 |
| BAT2         | 0.192507 | 8.963576 | 1.454692 | 0.147343 | 0.248987 | -6.02348 |
| RBM19        | 0.282508 | 5.292968 | 1.454276 | 0.147458 | 0.249127 | -5.98755 |
| ARHGEF35     | 0.528582 | 5.113548 | 1.454067 | 0.147516 | 0.249185 | -5.93979 |
| ERCC3        | 0.165346 | 5.350656 | 1.454023 | 0.147528 | 0.249185 | -6.00442 |
| CORO1B       | 0.264765 | 6.590767 | 1.453532 | 0.147664 | 0.249385 | -6.07234 |
| BNIP1        | 1.669514 | 0.993693 | 1.453402 | 0.1477   | 0.249405 | -5.05893 |
| IQCH         | 0.483063 | 0.714512 | 1.453359 | 0.147712 | 0.249405 | -5.15748 |
| COX5A        | -0.29387 | 6.453632 | -1.45295 | 0.147824 | 0.249564 | -6.07678 |
| PLS3         | 0.434946 | 7.891027 | 1.452269 | 0.148014 | 0.249856 | -6.06579 |
| YPEL3        | -0.35576 | 5.097287 | -1.45183 | 0.148136 | 0.25003  | -6.0267  |
| GYG1         | -0.26916 | 5.384021 | -1.45152 | 0.148223 | 0.250147 | -6.0437  |
| OPTN         | -0.27967 | 6.33283  | -1.45138 | 0.148262 | 0.250183 | -6.07869 |
| DHX33        | 0.293934 | 4.376424 | 1.451045 | 0.148354 | 0.250309 | -5.86308 |
| FADS2        | 0.826813 | 4.978224 | 1.450976 | 0.148374 | 0.250311 | -5.88574 |
| TJP2         | -0.40073 | 7.006545 | -1.45091 | 0.148392 | 0.250313 | -6.07077 |
| TESK1        | -0.25164 | 5.799292 | -1.45006 | 0.148629 | 0.250681 | -6.06744 |
| IL7          | 0.700031 | 1.444109 | 1.449924 | 0.148667 | 0.250714 | -5.24045 |
| NEO1         | -0.50582 | 6.390515 | -1.44978 | 0.148705 | 0.25075  | -6.08048 |
| ANKIB1       | 0.317202 | 6.535572 | 1.449588 | 0.14876  | 0.250812 | -6.07557 |
| JHDM1D       | -0.34743 | 5.838938 | -1.449   | 0.148925 | 0.251059 | -6.07337 |
| C3orf63      | -0.21354 | 6.401853 | -1.44836 | 0.149103 | 0.251328 | -6.08312 |
| LOC84740     | 2.174272 | 2.347763 | 1.448032 | 0.149194 | 0.251453 | -5.1788  |
| IL1F5        | 2.413571 | 0.765075 | 1.447118 | 0.14945  | 0.251853 | -5.06209 |
| PPP1R7       | -0.18927 | 5.37954  | -1.44639 | 0.149653 | 0.252166 | -6.04528 |
| CCDC85B      | 0.372022 | 4.80179  | 1.446258 | 0.149691 | 0.252167 | -5.92916 |

|           |          |          |          |          |          |          |
|-----------|----------|----------|----------|----------|----------|----------|
| PQBP1     | 0.256307 | 5.054523 | 1.446275 | 0.149686 | 0.252167 | -5.97477 |
| ATP1A1    | 0.330247 | 9.877657 | 1.446179 | 0.149713 | 0.252174 | -6.00828 |
| PCDHB13   | 0.668046 | 1.786772 | 1.445703 | 0.149846 | 0.252359 | -5.30546 |
| SLC43A2   | 0.395599 | 5.028752 | 1.445659 | 0.149858 | 0.252359 | -5.95616 |
| SND1      | -0.26294 | 7.613351 | -1.44547 | 0.149912 | 0.252419 | -6.06741 |
| FABP5     | 1.506668 | 4.004563 | 1.444998 | 0.150044 | 0.25261  | -5.56044 |
| PGLYRP3   | 2.151523 | 0.696562 | 1.444009 | 0.150321 | 0.253003 | -5.06589 |
| FAM122C   | -0.36246 | 1.545255 | -1.44407 | 0.150305 | 0.253003 | -5.41656 |
| RPUSD2    | 0.265052 | 2.905669 | 1.443974 | 0.150331 | 0.253003 | -5.56276 |
| RHBDL1    | -0.62222 | 0.360538 | -1.4437  | 0.150409 | 0.253103 | -5.26214 |
| AQP5      | -1.38291 | 0.433136 | -1.44336 | 0.150503 | 0.253212 | -5.37704 |
| SLC5A1    | 1.952086 | 3.443125 | 1.443338 | 0.15051  | 0.253212 | -5.3813  |
| ATP6V1D   | -0.25251 | 5.51338  | -1.4431  | 0.150578 | 0.253295 | -6.06293 |
| LOC613037 | -0.57774 | 2.260643 | -1.44231 | 0.150798 | 0.253605 | -5.58512 |
| ZNF460    | -0.34975 | 4.306836 | -1.44238 | 0.15078  | 0.253605 | -5.95422 |
| C3orf10   | -0.22737 | 6.143422 | -1.44183 | 0.150934 | 0.253803 | -6.08901 |
| FAM22G    | -0.37562 | 0.181785 | -1.44155 | 0.151015 | 0.253878 | -5.20718 |
| ELOVL4    | -0.87371 | 1.495627 | -1.44159 | 0.151003 | 0.253878 | -5.49434 |
| THYN1     | -0.30717 | 3.973255 | -1.44057 | 0.151289 | 0.254308 | -5.90144 |
| HOMER3    | 0.808801 | 4.013411 | 1.440394 | 0.15134  | 0.254363 | -5.70338 |
| ABCF3     | 0.236633 | 5.601574 | 1.440198 | 0.151395 | 0.254426 | -6.04121 |
| MAP3K14   | -0.33615 | 4.702803 | -1.44006 | 0.151434 | 0.254459 | -6.00393 |
| ANKS6     | -0.35103 | 5.13063  | -1.43985 | 0.151493 | 0.254528 | -6.04578 |
| ZNF614    | -0.50026 | 3.194576 | -1.4396  | 0.151565 | 0.254618 | -5.78152 |
| SERPINE1  | 0.78489  | 7.109331 | 1.439182 | 0.151682 | 0.254786 | -6.09301 |
| EDAR      | 1.448952 | 1.93822  | 1.438896 | 0.151763 | 0.254891 | -5.22642 |
| C20orf114 | -1.75197 | 0.596343 | -1.43845 | 0.151889 | 0.255071 | -5.46128 |
| LOC153684 | 0.505669 | 0.783565 | 1.437046 | 0.152288 | 0.25571  | -5.18831 |
| KGFLP2    | -0.45557 | 1.562772 | -1.43668 | 0.152393 | 0.255856 | -5.44514 |
| IFT81     | 0.349185 | 3.409649 | 1.436478 | 0.152449 | 0.25592  | -5.66413 |
| ZNF304    | -0.30091 | 3.750028 | -1.43632 | 0.152494 | 0.255964 | -5.86621 |
| GSDMA     | 1.364154 | 0.263677 | 1.435905 | 0.152612 | 0.256115 | -5.07431 |
| SIRPA     | 0.567166 | 5.804615 | 1.435874 | 0.152621 | 0.256115 | -6.03909 |
| PINX1     | 0.426612 | 2.733995 | 1.435742 | 0.152658 | 0.256148 | -5.51243 |
| TIMM13    | 0.308856 | 5.194468 | 1.435192 | 0.152815 | 0.25638  | -6.00085 |
| PCP4L1    | -1.06048 | 0.25025  | -1.43473 | 0.152945 | 0.256567 | -5.32517 |
| LOXL3     | 0.467513 | 1.917378 | 1.434444 | 0.153028 | 0.256644 | -5.36968 |
| LRRC37A   | -0.32233 | 3.819476 | -1.43449 | 0.153014 | 0.256644 | -5.88349 |
| ADAT3     | 0.336431 | 2.996496 | 1.434289 | 0.153072 | 0.256687 | -5.58056 |
| VDAC3     | 0.355734 | 6.194643 | 1.433345 | 0.153341 | 0.257108 | -6.08445 |
| KIAA1462  | -0.4974  | 4.586097 | -1.43302 | 0.153434 | 0.257233 | -6.01662 |
| STAB1     | -0.50309 | 5.161738 | -1.43213 | 0.153688 | 0.257628 | -6.06982 |
| SEPT7P2   | -0.26599 | 2.586108 | -1.43205 | 0.15371  | 0.257634 | -5.61069 |
| TM6SF1    | -0.47714 | 1.350752 | -1.43188 | 0.153759 | 0.257685 | -5.42057 |
| CROCCL1   | -0.27932 | 4.101843 | -1.43124 | 0.153943 | 0.257963 | -5.9319  |
| FNTA      | 0.270916 | 6.352027 | 1.430949 | 0.154026 | 0.25807  | -6.09785 |
| LMF2      | 0.259331 | 6.316078 | 1.430811 | 0.154065 | 0.258105 | -6.09715 |
| ZNF786    | 0.33033  | 3.293398 | 1.430665 | 0.154107 | 0.258145 | -5.65099 |
| CSTB      | 0.75738  | 8.045386 | 1.430421 | 0.154177 | 0.258231 | -6.0995  |
| KTELC1    | 0.239496 | 4.345657 | 1.430267 | 0.154221 | 0.258243 | -5.89617 |
| OPLAH     | -0.43593 | 4.979335 | -1.43029 | 0.154213 | 0.258243 | -6.05254 |
| EPHX3     | 1.747484 | 2.373103 | 1.430176 | 0.154247 | 0.258251 | -5.26937 |
| PHF19     | 0.315752 | 5.183662 | 1.430121 | 0.154263 | 0.258251 | -6.00673 |
| MTRF1L    | -0.22029 | 3.273179 | -1.42979 | 0.154357 | 0.258377 | -5.75586 |
| ATP6V1E1  | -0.21529 | 6.15449  | -1.42953 | 0.154433 | 0.258473 | -6.10649 |
| AIM2      | 1.441873 | 1.117069 | 1.429124 | 0.154549 | 0.258637 | -5.13276 |
| ORAOV1    | 0.617887 | 4.311398 | 1.42891  | 0.15461  | 0.258709 | -5.81939 |
| KCNN3     | -0.56553 | 1.132551 | -1.42868 | 0.154678 | 0.258772 | -5.3982  |

|                 |          |          |          |          |          |          |
|-----------------|----------|----------|----------|----------|----------|----------|
| HNRNPH1         | 0.183659 | 7.24337  | 1.428649 | 0.154685 | 0.258772 | -6.10765 |
| ZNF184          | 0.248061 | 3.374453 | 1.428345 | 0.154773 | 0.258877 | -5.68757 |
| CEPT1           | -0.19188 | 4.631115 | -1.4283  | 0.154785 | 0.258877 | -5.99681 |
| KLRK1           | -0.69251 | 0.047139 | -1.42817 | 0.154823 | 0.258879 | -5.24716 |
| VNN1            | 1.970994 | 2.812613 | 1.428214 | 0.15481  | 0.258879 | -5.30145 |
| EHBP1L1         | -0.29376 | 6.774519 | -1.4281  | 0.154844 | 0.258883 | -6.10915 |
| MBLAC2          | -0.28251 | 3.197598 | -1.42801 | 0.154869 | 0.258892 | -5.75564 |
| LOC728190       | 0.435504 | 3.654096 | 1.427334 | 0.155063 | 0.259187 | -5.71476 |
| ATXN2           | -0.20464 | 5.981708 | -1.42716 | 0.155113 | 0.259239 | -6.1051  |
| VPS26A          | 0.188019 | 6.332263 | 1.427039 | 0.155148 | 0.259267 | -6.10522 |
| RAB3IP          | 0.452583 | 5.047566 | 1.426805 | 0.155216 | 0.25932  | -5.97873 |
| CMAS            | 0.283604 | 5.447222 | 1.426801 | 0.155217 | 0.25932  | -6.04242 |
| TPRN            | -0.42804 | 4.809876 | -1.4262  | 0.155389 | 0.259576 | -6.04152 |
| BCAR3           | -0.42203 | 4.505122 | -1.42613 | 0.15541  | 0.259579 | -6.00906 |
| AMZ2            | 0.238251 | 5.544795 | 1.425728 | 0.155526 | 0.259743 | -6.05669 |
| EYA2            | -1.01518 | 2.91679  | -1.42526 | 0.155661 | 0.259937 | -5.83895 |
| BTBD11          | 1.491746 | 3.729068 | 1.424722 | 0.155816 | 0.260166 | -5.53738 |
| MUC5B           | -1.61755 | 3.058085 | -1.42447 | 0.155888 | 0.260255 | -5.94575 |
| FLJ42709        | -0.53504 | 0.946739 | -1.4243  | 0.155937 | 0.260305 | -5.37159 |
| TUBA1A          | -0.46267 | 6.445978 | -1.42407 | 0.156004 | 0.260385 | -6.11691 |
| SLC30A5         | -0.18039 | 5.56542  | -1.42393 | 0.156044 | 0.260421 | -6.08929 |
| GJD3            | 0.449849 | 2.89966  | 1.423588 | 0.156144 | 0.260502 | -5.55914 |
| TTC1            | -0.20663 | 5.00189  | -1.4236  | 0.156142 | 0.260502 | -6.04586 |
| SHC1            | 0.265997 | 7.430072 | 1.423574 | 0.156148 | 0.260502 | -6.11283 |
| LIMS3-LOC440895 | -0.72663 | 0.552362 | -1.42315 | 0.15627  | 0.260673 | -5.33471 |
| KCNAB2          | 0.54578  | 4.040303 | 1.42278  | 0.156378 | 0.260823 | -5.78571 |
| MAPK8IP3        | -0.28737 | 6.11354  | -1.42251 | 0.156458 | 0.260925 | -6.11679 |
| FAM19A5         | 0.817719 | 1.23558  | 1.42222  | 0.15654  | 0.261031 | -5.23399 |
| EREG            | 1.730331 | 3.041496 | 1.422122 | 0.156569 | 0.261047 | -5.38763 |
| HIRA            | -0.22013 | 5.627873 | -1.42145 | 0.156763 | 0.26134  | -6.09853 |
| ATP7B           | -0.73631 | 3.611848 | -1.4213  | 0.156808 | 0.261384 | -5.92588 |
| C6orf203        | -0.27475 | 2.737972 | -1.42106 | 0.156877 | 0.261467 | -5.65866 |
| LAP3            | 0.299176 | 6.248085 | 1.420681 | 0.156987 | 0.26162  | -6.1072  |
| EIF2B5          | 0.222756 | 5.847361 | 1.420441 | 0.157057 | 0.261705 | -6.08926 |
| DOCK7           | -0.26046 | 5.611386 | -1.42026 | 0.157109 | 0.261761 | -6.10118 |
| DNPEP           | 0.194717 | 5.947939 | 1.42009  | 0.157159 | 0.261812 | -6.09766 |
| NUP153          | 0.239834 | 6.812666 | 1.419832 | 0.157234 | 0.261906 | -6.12346 |
| REEP3           | -0.30057 | 5.433671 | -1.41975 | 0.157258 | 0.261916 | -6.09355 |
| CNOT10          | 0.207358 | 4.750976 | 1.419574 | 0.157309 | 0.261969 | -5.97961 |
| CD52            | 0.718704 | 2.435026 | 1.418468 | 0.157631 | 0.262459 | -5.44223 |
| TMEM45A         | 1.121285 | 4.065382 | 1.418369 | 0.157659 | 0.262459 | -5.68073 |
| TBCD            | -0.21359 | 6.139631 | -1.41841 | 0.157646 | 0.262459 | -6.12178 |
| C17orf61        | -0.32823 | 3.535701 | -1.41782 | 0.15782  | 0.262632 | -5.84984 |
| NIPSNAP1        | 0.295133 | 5.310525 | 1.417858 | 0.157809 | 0.262632 | -6.03948 |
| SPTLC2          | -0.31596 | 6.420856 | -1.41784 | 0.157813 | 0.262632 | -6.12659 |
| CTNNBIP1        | -0.40686 | 5.454974 | -1.4177  | 0.157854 | 0.262658 | -6.10322 |
| IPCEF1          | -0.53522 | 1.212323 | -1.4176  | 0.157883 | 0.262675 | -5.42282 |
| SBDSP1          | -0.23951 | 3.997023 | -1.41727 | 0.15798  | 0.262805 | -5.92831 |
| PIWIL4          | -0.76016 | 1.637279 | -1.41703 | 0.158049 | 0.262857 | -5.52675 |
| MXRA5           | 0.656966 | 7.356796 | 1.417082 | 0.158035 | 0.262857 | -6.12707 |
| LSP1            | -0.5173  | 4.901049 | -1.41674 | 0.158135 | 0.262969 | -6.07216 |
| BAIAP2L1        | 0.438614 | 6.921451 | 1.416575 | 0.158183 | 0.262986 | -6.1272  |
| CELSR1          | 0.622285 | 7.156977 | 1.416574 | 0.158183 | 0.262986 | -6.12757 |
| SERBP1          | 0.190752 | 8.384337 | 1.416222 | 0.158286 | 0.263126 | -6.09789 |
| CAMK2N2         | 0.782854 | 0.560241 | 1.416025 | 0.158344 | 0.263191 | -5.15355 |
| PARL            | 0.25713  | 5.272544 | 1.415884 | 0.158385 | 0.263228 | -6.04207 |
| RWDD2B          | -0.29408 | 3.632495 | -1.41574 | 0.158428 | 0.263267 | -5.86887 |
| AP3D1           | -0.18004 | 7.878412 | -1.41462 | 0.158756 | 0.263782 | -6.10562 |

|            |          |          |          |          |          |          |
|------------|----------|----------|----------|----------|----------|----------|
| PAPD7      | 0.246557 | 5.689634 | 1.414497 | 0.158791 | 0.263808 | -6.08421 |
| FAM76B     | 0.229577 | 4.210891 | 1.414344 | 0.158836 | 0.263852 | -5.89252 |
| ELTD1      | -0.45783 | 3.903675 | -1.41428 | 0.158856 | 0.263853 | -5.94919 |
| PITX2      | 1.561554 | 1.503962 | 1.414032 | 0.158927 | 0.263941 | -5.19332 |
| WEE1       | -0.31451 | 6.144481 | -1.41339 | 0.159117 | 0.264224 | -6.1306  |
| DEPDC5     | -0.17868 | 4.348476 | -1.41306 | 0.159212 | 0.26435  | -5.98068 |
| KDM4A      | 0.223223 | 5.772832 | 1.411753 | 0.159597 | 0.264958 | -6.09609 |
| ERLEC1     | -0.21366 | 5.877031 | -1.4115  | 0.159672 | 0.265052 | -6.12367 |
| HOPX       | -0.86004 | 4.459821 | -1.41118 | 0.159765 | 0.265174 | -6.06591 |
| ITGA11     | 0.928345 | 3.960572 | 1.410677 | 0.159914 | 0.265389 | -5.70386 |
| MFSD9      | -0.2944  | 3.736986 | -1.41043 | 0.159986 | 0.265475 | -5.89425 |
| LRRC8B     | 0.296863 | 5.591056 | 1.410373 | 0.160003 | 0.265475 | -6.07745 |
| MBOAT1     | -0.39807 | 4.131944 | -1.41009 | 0.160087 | 0.265582 | -5.97961 |
| C8orf37    | 0.377153 | 1.851187 | 1.409543 | 0.160248 | 0.265818 | -5.4067  |
| OVOL2      | 0.700979 | 2.971832 | 1.409169 | 0.160358 | 0.265938 | -5.54184 |
| ALDOA      | 0.311349 | 10.10766 | 1.409179 | 0.160355 | 0.265938 | -6.05206 |
| GPR75      | -0.36826 | 1.358408 | -1.40898 | 0.160416 | 0.265991 | -5.43549 |
| MAP3K1     | 0.322933 | 5.57471  | 1.408811 | 0.160464 | 0.265991 | -6.07596 |
| DYRK2      | 0.351599 | 5.797493 | 1.408838 | 0.160456 | 0.265991 | -6.09298 |
| STOML2     | 0.276419 | 5.815422 | 1.408802 | 0.160467 | 0.265991 | -6.0998  |
| C11orf58   | -0.17691 | 6.763627 | -1.40872 | 0.160491 | 0.266    | -6.1379  |
| GLRX2      | 0.24598  | 2.62648  | 1.408036 | 0.160693 | 0.266303 | -5.56073 |
| CYBB       | 0.606262 | 4.531268 | 1.407953 | 0.160718 | 0.266313 | -5.89774 |
| CG030      | -0.38702 | 1.830375 | -1.40781 | 0.160759 | 0.266318 | -5.51823 |
| USP33      | -0.17456 | 5.80752  | -1.40787 | 0.160741 | 0.266318 | -6.12444 |
| C14orf109  | 0.227563 | 3.477769 | 1.407704 | 0.160791 | 0.26634  | -5.74187 |
| NCRNA00182 | -0.32398 | 1.929168 | -1.40692 | 0.161024 | 0.266693 | -5.52827 |
| PTOV1      | -0.20949 | 6.409215 | -1.40675 | 0.161074 | 0.266745 | -6.14186 |
| MRPL28     | 0.296965 | 5.116002 | 1.406518 | 0.161143 | 0.266827 | -6.03373 |
| ZFAND2A    | 0.434103 | 3.67302  | 1.406201 | 0.161236 | 0.266951 | -5.7486  |
| HOXA7      | 1.338938 | 2.293538 | 1.405765 | 0.161366 | 0.267006 | -5.34483 |
| SPRY3      | -0.4096  | 1.581919 | -1.406   | 0.161297 | 0.267006 | -5.48259 |
| C2orf68    | 0.210934 | 4.798042 | 1.405771 | 0.161364 | 0.267006 | -6.00445 |
| NDUFC1     | -0.26825 | 4.564347 | -1.40578 | 0.161362 | 0.267006 | -6.02846 |
| ARPC1A     | 0.311417 | 7.085649 | 1.405877 | 0.161332 | 0.267006 | -6.14277 |
| FAM3C      | -0.30605 | 6.372997 | -1.40564 | 0.161403 | 0.267036 | -6.14352 |
| ADA        | -0.46569 | 3.738504 | -1.40411 | 0.161857 | 0.267755 | -5.93126 |
| ARFRP1     | 0.248236 | 4.512644 | 1.403737 | 0.161968 | 0.267908 | -5.9607  |
| RPL23      | 0.291641 | 8.857961 | 1.40335  | 0.162083 | 0.268067 | -6.10278 |
| EFTUD1     | 0.235212 | 4.704884 | 1.402973 | 0.162196 | 0.268178 | -5.99294 |
| COG6       | -0.2583  | 4.831482 | -1.40299 | 0.16219  | 0.268178 | -6.06127 |
| LPCAT2     | 0.414485 | 5.512894 | 1.402932 | 0.162208 | 0.268178 | -6.07007 |
| GNG2       | -0.43009 | 3.450118 | -1.40274 | 0.162264 | 0.268239 | -5.87408 |
| KCNG1      | 1.313492 | 1.084215 | 1.402613 | 0.162303 | 0.268271 | -5.18186 |
| FAM43A     | 0.553062 | 4.817657 | 1.402233 | 0.162416 | 0.268395 | -5.96878 |
| EEA1       | -0.31455 | 6.022396 | -1.40223 | 0.162416 | 0.268395 | -6.14368 |
| C17orf80   | -0.21204 | 4.455464 | -1.40214 | 0.162444 | 0.26841  | -6.01403 |
| C19orf33   | 0.97384  | 4.988078 | 1.400975 | 0.162791 | 0.268951 | -5.92919 |
| NCOA3      | 0.274958 | 7.007562 | 1.400005 | 0.163081 | 0.269398 | -6.15122 |
| C17orf97   | -0.49745 | 1.766036 | -1.39992 | 0.163106 | 0.269408 | -5.53736 |
| SIX4       | 0.88348  | 3.361114 | 1.399626 | 0.163195 | 0.269492 | -5.60293 |
| ZNF653     | -0.19754 | 2.600239 | -1.39962 | 0.163196 | 0.269492 | -5.64533 |
| C2orf77    | -0.50609 | 1.01104  | -1.39944 | 0.16325  | 0.269519 | -5.40951 |
| BTBD6      | -0.22849 | 5.456256 | -1.39944 | 0.163251 | 0.269519 | -6.1192  |
| ZBTB37     | -0.30912 | 0.81305  | -1.39921 | 0.163318 | 0.269587 | -5.35087 |
| CD6        | 0.675838 | 2.155375 | 1.399171 | 0.163331 | 0.269587 | -5.42609 |
| TMED1      | 0.210983 | 3.85322  | 1.398912 | 0.163408 | 0.269652 | -5.84114 |
| TMEM184A   | 0.759263 | 5.298964 | 1.398963 | 0.163393 | 0.269652 | -6.01314 |

|          |          |          |          |          |          |          |
|----------|----------|----------|----------|----------|----------|----------|
| SLC44A4  | -1.56614 | 3.608182 | -1.39881 | 0.163439 | 0.26967  | -6.04588 |
| NDUFA3   | -0.33923 | 4.80759  | -1.39866 | 0.163483 | 0.269711 | -6.07247 |
| DDX23    | 0.14917  | 6.758446 | 1.398245 | 0.163608 | 0.269886 | -6.15373 |
| MGC2752  | -0.23243 | 4.595551 | -1.39768 | 0.163777 | 0.270101 | -6.04023 |
| SLC12A4  | -0.32998 | 5.365134 | -1.3977  | 0.163772 | 0.270101 | -6.12175 |
| HELB     | 0.449189 | 2.366777 | 1.397617 | 0.163797 | 0.270101 | -5.49745 |
| SERPING1 | -0.58932 | 7.105322 | -1.39728 | 0.163897 | 0.270235 | -6.14052 |
| RDBP     | 0.241142 | 5.74917  | 1.397173 | 0.16393  | 0.270257 | -6.11333 |
| SGK494   | 0.416526 | 2.409382 | 1.396766 | 0.164052 | 0.270365 | -5.51081 |
| MECR     | -0.21091 | 3.579119 | -1.39687 | 0.16402  | 0.270365 | -5.86647 |
| RPA2     | 0.241134 | 4.855437 | 1.396761 | 0.164054 | 0.270365 | -6.02109 |
| YWHAQ    | 0.259952 | 8.767506 | 1.396641 | 0.164089 | 0.270393 | -6.11425 |
| PDGFC    | -0.49942 | 3.821269 | -1.3964  | 0.164162 | 0.270481 | -5.96596 |
| ARPC2    | 0.209733 | 8.010783 | 1.396104 | 0.164251 | 0.270595 | -6.13733 |
| UBTD1    | 0.350072 | 3.40268  | 1.394813 | 0.164639 | 0.271203 | -5.72137 |
| GPR157   | 0.49955  | 2.969884 | 1.394476 | 0.164741 | 0.271243 | -5.60306 |
| PIR      | 0.637077 | 3.72512  | 1.394499 | 0.164734 | 0.271243 | -5.73698 |
| SIRT5    | -0.24886 | 3.705115 | -1.39455 | 0.164718 | 0.271243 | -5.90372 |
| ECHS1    | -0.27623 | 6.308688 | -1.39466 | 0.164687 | 0.271243 | -6.15826 |
| TP53     | 0.547042 | 5.899604 | 1.394359 | 0.164776 | 0.271268 | -6.1069  |
| GFOD1    | -0.46046 | 3.18255  | -1.3942  | 0.164825 | 0.271317 | -5.83308 |
| KCNE3    | 1.417513 | 4.398303 | 1.392674 | 0.165285 | 0.271977 | -5.72044 |
| RGS14    | 0.414314 | 3.876965 | 1.392769 | 0.165256 | 0.271977 | -5.81606 |
| BSPRY    | -0.61578 | 3.376487 | -1.39273 | 0.165267 | 0.271977 | -5.89687 |
| SCN9A    | -0.99874 | 1.458773 | -1.39243 | 0.165359 | 0.272067 | -5.57634 |
| TLN2     | -0.51524 | 4.887365 | -1.39217 | 0.165438 | 0.272164 | -6.10345 |
| ERN2     | -1.53433 | 1.786701 | -1.39202 | 0.165481 | 0.272204 | -5.71365 |
| FMNL3    | 0.334106 | 5.326323 | 1.39164  | 0.165597 | 0.272363 | -6.07389 |
| SFMBT1   | -0.33679 | 4.121264 | -1.39141 | 0.165667 | 0.272445 | -5.99761 |
| TIGD2    | 0.351757 | 2.82102  | 1.389991 | 0.166097 | 0.273088 | -5.60349 |
| ATF5     | 0.384302 | 4.929775 | 1.390021 | 0.166088 | 0.273088 | -6.02316 |
| AKAP7    | -0.46294 | 2.591884 | -1.38922 | 0.16633  | 0.27344  | -5.70886 |
| MSN      | 0.52707  | 8.707419 | 1.388593 | 0.166521 | 0.273709 | -6.1354  |
| ZNF687   | 0.212003 | 6.06701  | 1.388554 | 0.166533 | 0.273709 | -6.14698 |
| H19      | 1.098314 | 6.569586 | 1.387965 | 0.166712 | 0.273971 | -6.12895 |
| CDH11    | 0.702059 | 5.146917 | 1.387727 | 0.166785 | 0.274026 | -6.01818 |
| PCCB     | -0.24712 | 5.483247 | -1.38776 | 0.166776 | 0.274026 | -6.13819 |
| FITM2    | -0.34024 | 1.488456 | -1.38766 | 0.166806 | 0.274029 | -5.48066 |
| ATP9A    | -0.43164 | 6.997014 | -1.38714 | 0.166963 | 0.274255 | -6.15985 |
| CHCHD1   | 0.235874 | 4.523492 | 1.386798 | 0.167067 | 0.274393 | -5.98721 |
| ANKRD23  | 0.361729 | 1.364288 | 1.386375 | 0.167196 | 0.27453  | -5.36158 |
| TLR5     | -0.46857 | 2.807135 | -1.38623 | 0.16724  | 0.27453  | -5.76148 |
| SDHAP1   | 0.350139 | 3.683166 | 1.386314 | 0.167215 | 0.27453  | -5.79199 |
| CREB5    | -0.61372 | 3.489976 | -1.3862  | 0.167248 | 0.27453  | -5.93539 |
| CASC4    | -0.26355 | 6.758882 | -1.3863  | 0.167219 | 0.27453  | -6.16793 |
| A1BG     | 0.568409 | 1.053971 | 1.386006 | 0.167309 | 0.27458  | -5.28768 |
| FLJ35776 | 0.459306 | 2.210948 | 1.385972 | 0.167319 | 0.27458  | -5.48576 |
| HLA-DMB  | 0.66262  | 4.27905  | 1.384983 | 0.167621 | 0.274913 | -5.8656  |
| ARHGEF19 | 0.604424 | 4.362373 | 1.385107 | 0.167583 | 0.274913 | -5.89414 |
| SLC24A3  | -0.6321  | 3.323831 | -1.38506 | 0.167597 | 0.274913 | -5.91221 |
| MRPL10   | -0.19152 | 5.413124 | -1.38506 | 0.167596 | 0.274913 | -6.1337  |
| DICER1   | -0.24409 | 6.793549 | -1.38492 | 0.167639 | 0.274913 | -6.16958 |
| FOXJ3    | -0.18219 | 6.279045 | -1.38493 | 0.167638 | 0.274913 | -6.1703  |
| GUK1     | -0.2452  | 6.892009 | -1.38472 | 0.1677   | 0.274979 | -6.16828 |
| PTPN20B  | -1.08043 | -0.19864 | -1.38422 | 0.167853 | 0.27519  | -5.32198 |
| EPRS     | 0.225085 | 7.212136 | 1.384174 | 0.167868 | 0.27519  | -6.17054 |
| DNAJC8   | 0.177182 | 5.845291 | 1.383646 | 0.168029 | 0.275423 | -6.14293 |
| CUL9     | -0.32242 | 5.600025 | -1.3829  | 0.168257 | 0.275765 | -6.15525 |

|          |          |          |          |          |          |          |
|----------|----------|----------|----------|----------|----------|----------|
| STX16    | 0.204038 | 6.436853 | 1.382516 | 0.168375 | 0.275925 | -6.16962 |
| LY86     | 0.708594 | 0.757307 | 1.382171 | 0.168481 | 0.276066 | -5.23551 |
| EDNRA    | 0.589321 | 3.72482  | 1.381979 | 0.16854  | 0.27613  | -5.76112 |
| SIM2     | -0.76078 | 3.9308   | -1.38171 | 0.168621 | 0.276221 | -6.03353 |
| IRF2BP1  | -0.23483 | 5.346851 | -1.38167 | 0.168635 | 0.276221 | -6.13629 |
| CHMP4C   | 0.570257 | 3.899701 | 1.381357 | 0.168731 | 0.276346 | -5.80073 |
| KLK11    | -1.15592 | 4.207303 | -1.38043 | 0.169016 | 0.276781 | -6.10573 |
| GGT1     | -0.69498 | 3.114393 | -1.38007 | 0.169127 | 0.27693  | -5.87202 |
| NUDT16L1 | -0.20202 | 3.707622 | -1.37976 | 0.16922  | 0.277031 | -5.91563 |
| LRP1     | -0.38785 | 8.952726 | -1.37974 | 0.169228 | 0.277031 | -6.11086 |
| SLC9A7   | -0.46535 | 2.865135 | -1.37958 | 0.169275 | 0.277046 | -5.77995 |
| PPP6C    | -0.15477 | 6.234276 | -1.37958 | 0.169277 | 0.277046 | -6.17637 |
| ATP5I    | -0.30462 | 5.326504 | -1.37943 | 0.169323 | 0.277088 | -6.14231 |
| C10orf81 | 2.345778 | 1.623543 | 1.379268 | 0.169373 | 0.277136 | -5.15934 |
| XKRX     | 0.834734 | 0.466899 | 1.379141 | 0.169412 | 0.277136 | -5.18512 |
| APLP2    | -0.2484  | 9.034118 | -1.37914 | 0.16941  | 0.277136 | -6.11307 |
| SPA17    | 0.42754  | 2.355407 | 1.379065 | 0.169435 | 0.277142 | -5.52381 |
| CNOT7    | 0.220874 | 6.369055 | 1.378816 | 0.169512 | 0.277235 | -6.17232 |
| SGMS1    | -0.25553 | 5.218639 | -1.37874 | 0.169534 | 0.27724  | -6.13146 |
| FAM10A4  | -0.20365 | 3.469474 | -1.37796 | 0.169776 | 0.277602 | -5.86797 |
| PCDHGB1  | 1.12582  | 0.752057 | 1.376232 | 0.170309 | 0.278441 | -5.19336 |
| C6orf130 | -0.29291 | 3.775168 | -1.3755  | 0.170534 | 0.278777 | -5.95084 |
| ZSCAN16  | -0.49246 | 1.697938 | -1.37527 | 0.170607 | 0.278864 | -5.55591 |
| IFIT5    | 0.336603 | 4.513171 | 1.375029 | 0.170681 | 0.278951 | -5.98733 |
| POLR3B   | -0.24518 | 4.038648 | -1.37479 | 0.170756 | 0.279041 | -5.99499 |
| P2RY2    | 0.855005 | 3.274875 | 1.374375 | 0.170883 | 0.279217 | -5.62838 |
| SLC17A5  | -0.41091 | 4.326479 | -1.37377 | 0.171072 | 0.279459 | -6.0576  |
| SDHAF2   | 0.188699 | 4.996272 | 1.373822 | 0.171055 | 0.279459 | -6.07564 |
| BATF2    | 0.993354 | 2.872395 | 1.373483 | 0.17116  | 0.279571 | -5.53089 |
| C17orf75 | 0.265087 | 3.481113 | 1.373342 | 0.171204 | 0.279609 | -5.78293 |
| KIAA0907 | 0.255948 | 5.699668 | 1.373111 | 0.171275 | 0.279694 | -6.14108 |
| LILRA6   | 0.686456 | 0.922734 | 1.371938 | 0.17164  | 0.28021  | -5.27342 |
| ADAMTS4  | -0.54182 | 4.796647 | -1.37177 | 0.171692 | 0.28021  | -6.12693 |
| FTO      | -0.23325 | 5.738036 | -1.37188 | 0.171657 | 0.28021  | -6.17317 |
| DCTD     | -0.19662 | 5.89412  | -1.37187 | 0.171662 | 0.28021  | -6.17832 |
| RPS6KA3  | 0.269313 | 6.649408 | 1.371776 | 0.17169  | 0.28021  | -6.1875  |
| ATL3     | -0.31075 | 5.458301 | -1.37168 | 0.171718 | 0.280221 | -6.16208 |
| ELP4     | 0.228175 | 3.770933 | 1.371389 | 0.17181  | 0.280338 | -5.85771 |
| NDUFA4L2 | 1.049456 | 5.077934 | 1.371212 | 0.171865 | 0.280395 | -5.98085 |
| TOMM7    | -0.28455 | 5.836973 | -1.37113 | 0.171891 | 0.280404 | -6.18001 |
| LRP4     | -0.54759 | 4.317695 | -1.37102 | 0.171927 | 0.28043  | -6.07599 |
| HAS3     | 1.361713 | 4.947183 | 1.370624 | 0.172049 | 0.280596 | -5.89074 |
| IFT46    | -0.25906 | 3.568118 | -1.37034 | 0.172138 | 0.280708 | -5.91019 |
| TRAM2    | 0.311366 | 6.069434 | 1.369946 | 0.17226  | 0.280875 | -6.16771 |
| HSPC159  | -0.38776 | 5.090078 | -1.36937 | 0.17244  | 0.281135 | -6.14322 |
| ZNF548   | -0.29363 | 3.396389 | -1.36913 | 0.172516 | 0.281226 | -5.88187 |
| SLC39A9  | -0.18718 | 6.844464 | -1.36883 | 0.172609 | 0.281346 | -6.19149 |
| ZNF814   | -0.38476 | 3.930642 | -1.36841 | 0.172738 | 0.281523 | -6.00483 |
| FAM35B   | -0.22804 | 2.485273 | -1.36816 | 0.172817 | 0.281585 | -5.66955 |
| DNHD1    | -0.37971 | 3.472118 | -1.36817 | 0.172815 | 0.281585 | -5.9162  |
| TMEM93   | 0.266225 | 4.07979  | 1.367581 | 0.172998 | 0.281848 | -5.92279 |
| GOSR2    | -0.18034 | 5.545443 | -1.36751 | 0.17302  | 0.281852 | -6.16596 |
| FKBP2    | -0.27149 | 5.416485 | -1.36723 | 0.173109 | 0.281963 | -6.16303 |
| AUTS2    | -0.57032 | 5.234277 | -1.36643 | 0.173357 | 0.282334 | -6.16945 |
| DGAT1    | 0.423211 | 5.515527 | 1.366135 | 0.173451 | 0.282454 | -6.11955 |
| ZNF180   | -0.2367  | 3.13624  | -1.3659  | 0.173525 | 0.282543 | -5.81561 |
| UST      | -0.61681 | 3.445919 | -1.36539 | 0.173685 | 0.282769 | -5.96012 |
| ZCWPW1   | -0.51313 | 0.96696  | -1.36413 | 0.17408  | 0.28338  | -5.45211 |



|              |          |          |          |          |          |          |
|--------------|----------|----------|----------|----------|----------|----------|
| FAM193B      | -0.25455 | 4.808181 | -1.36385 | 0.174168 | 0.28349  | -6.11224 |
| GAB3         | -0.42963 | 1.39137  | -1.36338 | 0.174315 | 0.283696 | -5.51166 |
| ESYT3        | -0.77613 | 0.771621 | -1.36328 | 0.174348 | 0.283716 | -5.45928 |
| LOC150786    | 0.485344 | 1.151566 | 1.363123 | 0.174396 | 0.283762 | -5.34308 |
| NOTCH2       | -0.33276 | 7.548259 | -1.36164 | 0.174863 | 0.284488 | -6.18385 |
| UBAP1        | -0.26335 | 6.230795 | -1.36143 | 0.17493  | 0.284564 | -6.20253 |
| PLAC4        | -0.63201 | 1.006177 | -1.36135 | 0.174955 | 0.284572 | -5.4773  |
| SEC11A       | 0.209311 | 5.98092  | 1.361254 | 0.174985 | 0.284587 | -6.17967 |
| TDRKH        | 0.520616 | 3.167727 | 1.360893 | 0.175099 | 0.284706 | -5.68162 |
| THAP5        | -0.22495 | 4.309288 | -1.36096 | 0.175079 | 0.284706 | -6.05221 |
| DNAH17       | 1.25151  | 2.537822 | 1.360152 | 0.175333 | 0.285024 | -5.45767 |
| CEBPA        | 0.651811 | 5.098891 | 1.360145 | 0.175335 | 0.285024 | -6.05408 |
| PTPN7        | 0.668594 | 2.672712 | 1.359984 | 0.175386 | 0.285073 | -5.5692  |
| C1orf91      | 0.267351 | 2.873029 | 1.359627 | 0.175499 | 0.285224 | -5.66949 |
| DHX35        | 0.222798 | 4.329971 | 1.359514 | 0.175534 | 0.285248 | -5.99323 |
| ZNF780A      | -0.27384 | 3.632009 | -1.35911 | 0.175663 | 0.285357 | -5.94067 |
| KCTD1        | 0.541472 | 5.189008 | 1.359125 | 0.175658 | 0.285357 | -6.08092 |
| CDK18        | -0.43302 | 5.159568 | -1.35911 | 0.175662 | 0.285357 | -6.16511 |
| MUM1         | -0.18802 | 4.901138 | -1.35894 | 0.175714 | 0.285408 | -6.12287 |
| C14orf181    | 0.355304 | 0.988999 | 1.358678 | 0.175799 | 0.285512 | -5.34088 |
| C14orf73     | -0.84785 | 0.312975 | -1.35854 | 0.175841 | 0.285548 | -5.39686 |
| RAD51C       | 0.270637 | 3.254332 | 1.357568 | 0.17615  | 0.286017 | -5.75296 |
| C19orf29     | 0.193176 | 4.906588 | 1.356907 | 0.17636  | 0.286291 | -6.08733 |
| STYX         | -0.23342 | 5.283315 | -1.35695 | 0.176347 | 0.286291 | -6.16476 |
| DEM1         | 0.446186 | 2.413969 | 1.356649 | 0.176442 | 0.28639  | -5.56282 |
| CCNT2        | -0.21708 | 5.714537 | -1.35634 | 0.17654  | 0.286516 | -6.19227 |
| SIVA1        | 0.235623 | 5.434528 | 1.356157 | 0.176598 | 0.286577 | -6.14207 |
| ZFPL1        | 0.216787 | 4.905285 | 1.355676 | 0.176751 | 0.2867   | -6.08576 |
| C17orf62     | 0.204699 | 5.74655  | 1.355732 | 0.176733 | 0.2867   | -6.17192 |
| RPL35A       | 0.288031 | 8.272106 | 1.355661 | 0.176756 | 0.2867   | -6.18696 |
| TMEM87B      | 0.251869 | 6.509222 | 1.355706 | 0.176741 | 0.2867   | -6.2066  |
| RTN2         | 0.451988 | 2.765776 | 1.355254 | 0.176885 | 0.286876 | -5.62481 |
| WDR92        | 0.200265 | 3.091691 | 1.354671 | 0.177071 | 0.287131 | -5.73546 |
| FAM109A      | -0.46314 | 4.11729  | -1.35463 | 0.177084 | 0.287131 | -6.0605  |
| NME1-NME2    | 0.480284 | 1.432341 | 1.354461 | 0.177137 | 0.287185 | -5.39777 |
| BET1L        | -0.21815 | 6.180788 | -1.35438 | 0.177163 | 0.287194 | -6.21046 |
| LOC100130015 | -0.3818  | 0.586356 | -1.35428 | 0.177193 | 0.28721  | -5.38652 |
| LGALS7       | 2.712623 | 2.471654 | 1.354009 | 0.177281 | 0.287319 | -5.25755 |
| RBAK         | 0.206015 | 5.253731 | 1.353845 | 0.177334 | 0.28737  | -6.12985 |
| KLHL17       | 0.366836 | 2.825002 | 1.353094 | 0.177573 | 0.287725 | -5.65177 |
| WNT9A        | -0.81285 | 0.510769 | -1.35301 | 0.177599 | 0.287733 | -5.44023 |
| PCSK4        | -0.52409 | 0.641404 | -1.35271 | 0.177695 | 0.287811 | -5.41474 |
| CCND1        | 0.542398 | 8.418361 | 1.352669 | 0.177708 | 0.287811 | -6.19319 |
| CHTF8        | -0.15921 | 6.478807 | -1.3527  | 0.177698 | 0.287811 | -6.21574 |
| ZNF214       | -0.59005 | -0.07406 | -1.35249 | 0.177766 | 0.28787  | -5.31774 |
| DR1          | 0.183376 | 5.879729 | 1.35195  | 0.177938 | 0.288116 | -6.18759 |
| KIAA1407     | -0.3664  | 2.990534 | -1.35146 | 0.178093 | 0.288314 | -5.8279  |
| TRIM33       | -0.2034  | 6.478987 | -1.35144 | 0.178102 | 0.288314 | -6.21752 |
| LOC642587    | 2.780111 | 1.542084 | 1.350566 | 0.178381 | 0.288665 | -5.1928  |
| LOC285033    | -0.21077 | 1.443893 | -1.35057 | 0.17838  | 0.288665 | -5.50401 |
| ARL2         | 0.288448 | 5.309303 | 1.350656 | 0.178352 | 0.288665 | -6.13232 |
| NEU3         | -0.33676 | 2.360307 | -1.35031 | 0.178461 | 0.288762 | -5.68675 |
| MCM3APAS     | 0.347948 | 1.099722 | 1.349901 | 0.178594 | 0.288935 | -5.36993 |
| KRT19        | 1.148937 | 8.798859 | 1.349851 | 0.178609 | 0.288935 | -6.20071 |
| IQCK         | -0.3083  | 3.554555 | -1.34972 | 0.178652 | 0.288971 | -5.94239 |
| TMEM79       | 0.858249 | 4.364624 | 1.349568 | 0.1787   | 0.289015 | -5.89532 |
| DOK6         | -0.56063 | 0.518234 | -1.34922 | 0.178811 | 0.28916  | -5.40521 |
| C9orf86      | -0.21394 | 6.871702 | -1.34904 | 0.178869 | 0.28922  | -6.2173  |

|           |          |          |          |          |          |          |
|-----------|----------|----------|----------|----------|----------|----------|
| B3GNT9    | 0.375645 | 4.386919 | 1.348652 | 0.178994 | 0.28931  | -5.99259 |
| ARG2      | -0.3063  | 3.862715 | -1.34861 | 0.179007 | 0.28931  | -6.00898 |
| POP4      | 0.328296 | 4.701378 | 1.348637 | 0.178999 | 0.28931  | -6.05379 |
| PSME4     | 0.200826 | 7.166123 | 1.348761 | 0.178959 | 0.28931  | -6.21877 |
| ZNF750    | 2.366926 | 3.610629 | 1.34814  | 0.179158 | 0.289521 | -5.48542 |
| NDUFV2    | -0.24878 | 5.409094 | -1.34806 | 0.179185 | 0.289531 | -6.18715 |
| SFI1      | 0.240533 | 4.248679 | 1.347826 | 0.179259 | 0.289617 | -5.98876 |
| AEBP2     | 0.317366 | 5.722531 | 1.347661 | 0.179312 | 0.289669 | -6.17303 |
| RENBP     | 0.649092 | 1.615639 | 1.347406 | 0.179394 | 0.289768 | -5.41251 |
| NAALADL1  | -0.45853 | 0.337653 | -1.34725 | 0.179444 | 0.289774 | -5.36831 |
| CSRP2     | -0.57559 | 3.715996 | -1.3472  | 0.17946  | 0.289774 | -6.02868 |
| ZBTB44    | -0.23063 | 6.084032 | -1.3473  | 0.179427 | 0.289774 | -6.21812 |
| C11orf57  | -0.1961  | 4.827409 | -1.34684 | 0.179576 | 0.289928 | -6.13187 |
| PLCB1     | -0.47609 | 4.654451 | -1.34676 | 0.179602 | 0.289937 | -6.13985 |
| ATG7      | -0.2172  | 4.788104 | -1.34653 | 0.179674 | 0.29002  | -6.12979 |
| GPR56     | 0.359296 | 8.053872 | 1.346254 | 0.179764 | 0.29011  | -6.20712 |
| AKR1C1    | -1.19836 | 5.481962 | -1.34623 | 0.179772 | 0.29011  | -6.22172 |
| NAGPA     | -0.20676 | 3.789351 | -1.34608 | 0.179821 | 0.290156 | -5.97852 |
| RABL2B    | 0.276285 | 3.661694 | 1.345824 | 0.179903 | 0.290254 | -5.85862 |
| NUDT14    | 0.329955 | 3.867884 | 1.34518  | 0.18011  | 0.290555 | -5.89199 |
| GSPT1     | -0.17421 | 7.610675 | -1.34507 | 0.180146 | 0.290579 | -6.20806 |
| GIMAP2    | 0.554168 | 2.086149 | 1.344944 | 0.180186 | 0.290611 | -5.50397 |
| DNAJC21   | -0.21165 | 5.979047 | -1.34473 | 0.180257 | 0.290664 | -6.21821 |
| SPPL3     | 0.270107 | 6.434671 | 1.344713 | 0.180261 | 0.290664 | -6.21893 |
| EGR3      | -0.60269 | 3.783317 | -1.34421 | 0.180423 | 0.290875 | -6.04715 |
| CD2AP     | 0.378697 | 6.932539 | 1.344178 | 0.180433 | 0.290875 | -6.22669 |
| SLC25A14  | 0.231872 | 2.567456 | 1.344036 | 0.180479 | 0.290916 | -5.63817 |
| STK36     | -0.2853  | 4.443962 | -1.34392 | 0.180515 | 0.29094  | -6.09964 |
| LOC147804 | 0.469032 | 2.73506  | 1.343414 | 0.18068  | 0.291172 | -5.6309  |
| ARHGAP12  | -0.39313 | 5.604611 | -1.34316 | 0.180761 | 0.291269 | -6.21167 |
| SLC35F2   | 0.461132 | 4.606997 | 1.343062 | 0.180794 | 0.291288 | -6.02495 |
| KRT7      | 1.91746  | 4.783144 | 1.342736 | 0.180899 | 0.291424 | -5.77818 |
| C10orf18  | 0.212135 | 6.872238 | 1.342411 | 0.181004 | 0.29156  | -6.22948 |
| MAP3K12   | -0.36189 | 2.413817 | -1.34185 | 0.181186 | 0.291617 | -5.7169  |
| MAP2      | -0.67609 | 3.587905 | -1.34193 | 0.181161 | 0.291617 | -6.02764 |
| MAPK7     | -0.23886 | 4.694486 | -1.34197 | 0.181146 | 0.291617 | -6.12809 |
| AIG1      | -0.26549 | 4.892441 | -1.34196 | 0.181151 | 0.291617 | -6.15207 |
| RAB11FIP5 | -0.22095 | 5.554527 | -1.34188 | 0.181176 | 0.291617 | -6.20313 |
| SUPT6H    | -0.19182 | 7.546776 | -1.3419  | 0.18117  | 0.291617 | -6.21347 |
| FBRSL1    | -0.22185 | 6.320752 | -1.34201 | 0.181134 | 0.291617 | -6.22915 |
| SEMA6A    | -0.63508 | 4.295382 | -1.34156 | 0.181281 | 0.291736 | -6.12239 |
| BCL6B     | -0.4224  | 2.738035 | -1.34145 | 0.181317 | 0.291761 | -5.79633 |
| YTHDF3    | -0.18749 | 6.87054  | -1.33936 | 0.181995 | 0.292818 | -6.23058 |
| SYAP1     | -0.23034 | 5.520959 | -1.33914 | 0.182064 | 0.292895 | -6.20508 |
| CCDC64    | 0.460848 | 4.574333 | 1.338903 | 0.182142 | 0.292987 | -6.0253  |
| MGAT1     | -0.21287 | 6.934713 | -1.33855 | 0.182256 | 0.293137 | -6.23025 |
| CD72      | 0.584392 | 0.55161  | 1.338404 | 0.182304 | 0.293181 | -5.27802 |
| C2orf18   | 0.198946 | 6.356769 | 1.33833  | 0.182328 | 0.293186 | -6.227   |
| NUP98     | 0.172075 | 7.349233 | 1.33751  | 0.182595 | 0.293581 | -6.23031 |
| GBP4      | 0.677182 | 5.157846 | 1.337172 | 0.182705 | 0.293724 | -6.08937 |
| H1FO      | 0.358738 | 7.443336 | 1.336649 | 0.182875 | 0.293964 | -6.23267 |
| RNF26     | 0.22333  | 5.798744 | 1.336517 | 0.182919 | 0.294    | -6.20016 |
| CHST12    | 0.248567 | 4.311662 | 1.336372 | 0.182966 | 0.294042 | -6.01555 |
| DAG1      | -0.3233  | 7.908415 | -1.336   | 0.183088 | 0.294204 | -6.20764 |
| COMMD1    | -0.22847 | 3.578303 | -1.33592 | 0.183114 | 0.294213 | -5.95258 |
| RCBTB1    | -0.30128 | 4.720671 | -1.3354  | 0.183284 | 0.294452 | -6.14524 |
| ZNF354B   | -0.27721 | 2.454066 | -1.33474 | 0.183499 | 0.294764 | -5.7169  |
| CDC16     | -0.21164 | 5.868448 | -1.33439 | 0.183613 | 0.294911 | -6.22798 |

|                 |          |          |          |          |          |          |
|-----------------|----------|----------|----------|----------|----------|----------|
| EXOG            | -0.2258  | 2.624407 | -1.33394 | 0.183762 | 0.295083 | -5.7443  |
| ACAA2           | -0.58872 | 4.843464 | -1.334   | 0.183741 | 0.295083 | -6.18452 |
| YY2             | 0.361184 | 0.267123 | 1.332964 | 0.18408  | 0.29556  | -5.27274 |
| DZIP1           | -0.5801  | 3.214534 | -1.33228 | 0.184303 | 0.295885 | -5.95041 |
| GIMAP4          | -0.42285 | 3.531367 | -1.33205 | 0.18438  | 0.295975 | -5.98583 |
| ANAPC4          | -0.17596 | 4.331226 | -1.3319  | 0.184427 | 0.296016 | -6.08767 |
| FBF1            | 0.364684 | 3.531056 | 1.331585 | 0.184532 | 0.296116 | -5.83091 |
| SIPA1L2         | 0.486886 | 5.909067 | 1.331594 | 0.184529 | 0.296116 | -6.19742 |
| TNFSF12-TNFSF13 | -0.48344 | 2.924612 | -1.33141 | 0.184589 | 0.296139 | -5.86021 |
| ACP5            | 0.475955 | 5.307787 | 1.331422 | 0.184586 | 0.296139 | -6.13815 |
| IFI44L          | 1.004933 | 4.446394 | 1.331215 | 0.184654 | 0.296209 | -5.90467 |
| WDR41           | -0.22917 | 4.744903 | -1.33089 | 0.18476  | 0.296346 | -6.14732 |
| SERPINB2        | 2.245796 | 2.793465 | 1.330811 | 0.184786 | 0.296354 | -5.39443 |
| ZNF235          | -0.30505 | 1.874789 | -1.33065 | 0.184838 | 0.296402 | -5.61697 |
| NFATC3          | 0.212172 | 5.574193 | 1.330368 | 0.184932 | 0.296519 | -6.19147 |
| SLC29A4         | -0.69042 | 2.806397 | -1.32971 | 0.185148 | 0.296832 | -5.87791 |
| ZBTB10          | -0.56322 | 3.733184 | -1.32962 | 0.185179 | 0.296847 | -6.05161 |
| SPRYD4          | 0.251949 | 3.73533  | 1.328969 | 0.185392 | 0.297098 | -5.90054 |
| CHUK            | -0.18424 | 5.129112 | -1.32903 | 0.185371 | 0.297098 | -6.18449 |
| YTHDC1          | -0.12652 | 6.105891 | -1.32895 | 0.185399 | 0.297098 | -6.24061 |
| FUZ             | -0.54555 | 2.026611 | -1.32877 | 0.185458 | 0.297158 | -5.68765 |
| TINF2           | -0.21573 | 5.39282  | -1.32844 | 0.185568 | 0.2973   | -6.20987 |
| MRPL43          | -0.18728 | 5.124338 | -1.32835 | 0.185595 | 0.29731  | -6.18532 |
| ATXN10          | 0.218133 | 6.221501 | 1.328197 | 0.185646 | 0.297358 | -6.23494 |
| SAMD9L          | 0.644851 | 5.450438 | 1.327783 | 0.185783 | 0.297542 | -6.1416  |
| TMEM128         | -0.22079 | 4.058574 | -1.32724 | 0.185964 | 0.297798 | -6.05737 |
| PACS1           | -0.27834 | 7.520055 | -1.32709 | 0.186013 | 0.297843 | -6.2318  |
| RCL1            | 0.256852 | 3.811474 | 1.326707 | 0.186138 | 0.297929 | -5.91988 |
| CHDH            | -0.83235 | 2.89556  | -1.32663 | 0.186165 | 0.297929 | -5.92544 |
| SLC43A3         | 0.527594 | 5.282305 | 1.326695 | 0.186142 | 0.297929 | -6.13676 |
| SERF2           | -0.23118 | 7.835339 | -1.32677 | 0.186116 | 0.297929 | -6.2246  |
| KREMEN1         | -0.54694 | 6.321558 | -1.3266  | 0.186173 | 0.297929 | -6.24979 |
| INADL           | -0.24466 | 6.59451  | -1.32635 | 0.186257 | 0.298029 | -6.25037 |
| ADD3            | -0.3721  | 6.910525 | -1.32605 | 0.186354 | 0.29815  | -6.24457 |
| PTRH1           | 0.336243 | 2.694451 | 1.325795 | 0.18644  | 0.298218 | -5.66671 |
| OSGIN1          | -0.62094 | 3.048736 | -1.32586 | 0.186418 | 0.298218 | -5.92513 |
| RASGEF1A        | 1.158898 | 1.375577 | 1.325677 | 0.186478 | 0.298242 | -5.33929 |
| B3GALT5         | -1.09295 | 0.530687 | -1.32556 | 0.186518 | 0.298242 | -5.51014 |
| HCFC1           | 0.19152  | 8.008591 | 1.325578 | 0.186511 | 0.298242 | -6.23188 |
| ATP5EP2         | -0.29851 | 0.831447 | -1.32523 | 0.186628 | 0.29828  | -5.44883 |
| FAM190A         | -0.7521  | 1.138417 | -1.32529 | 0.186606 | 0.29828  | -5.56521 |
| CHST2           | 0.857133 | 4.188977 | 1.325258 | 0.186617 | 0.29828  | -5.8868  |
| GOLGA8B         | -0.42283 | 4.418403 | -1.32537 | 0.186579 | 0.29828  | -6.13585 |
| AMN             | 1.072274 | 2.837349 | 1.324996 | 0.186704 | 0.298368 | -5.57368 |
| STXBP5          | -0.30544 | 5.154534 | -1.32493 | 0.186727 | 0.29837  | -6.2019  |
| RPS15A          | 0.269335 | 8.102852 | 1.324613 | 0.186831 | 0.298502 | -6.23246 |
| KPNA1           | 0.210448 | 6.747614 | 1.32453  | 0.186858 | 0.298512 | -6.25253 |
| WIBG            | 0.242762 | 4.124165 | 1.324459 | 0.186882 | 0.298515 | -5.99542 |
| ZNF816A         | -0.4955  | 2.532405 | -1.32394 | 0.187053 | 0.298721 | -5.78636 |
| MUDENG          | -0.18945 | 5.452891 | -1.324   | 0.187034 | 0.298721 | -6.21832 |
| PGAP2           | 0.271246 | 4.403298 | 1.32379  | 0.187103 | 0.298735 | -6.04444 |
| UQCR10          | -0.20957 | 5.670239 | -1.32379 | 0.187105 | 0.298735 | -6.23277 |
| RPS23           | -0.25528 | 8.261994 | -1.32372 | 0.187126 | 0.298735 | -6.21401 |
| PHPT1           | -0.2491  | 5.119812 | -1.32334 | 0.187253 | 0.298903 | -6.19638 |
| GPRC5D          | 0.713306 | 0.269066 | 1.322707 | 0.187463 | 0.299204 | -5.24469 |
| INO80E          | 0.219829 | 4.756707 | 1.322496 | 0.187533 | 0.299282 | -6.11002 |
| ST6GALNAC5      | -0.58201 | 0.974631 | -1.32211 | 0.18766  | 0.29945  | -5.51896 |
| BARX2           | 1.162117 | 3.170043 | 1.321893 | 0.187733 | 0.299501 | -5.62377 |

|           |          |          |          |          |          |          |
|-----------|----------|----------|----------|----------|----------|----------|
| IAH1      | 0.227219 | 4.264661 | 1.321889 | 0.187735 | 0.299501 | -6.02948 |
| FLG       | -1.11087 | 0.97482  | -1.3217  | 0.187798 | 0.299568 | -5.60072 |
| FAM126B   | -0.27032 | 5.560209 | -1.32161 | 0.187827 | 0.299579 | -6.23255 |
| TIGD7     | -0.37946 | 2.343224 | -1.3215  | 0.187865 | 0.299606 | -5.73131 |
| HMGXB3    | -0.1753  | 5.972373 | -1.32131 | 0.187926 | 0.299669 | -6.24774 |
| BNIP2     | 0.205314 | 5.586755 | 1.320808 | 0.188094 | 0.299903 | -6.20561 |
| NPRL3     | 0.219988 | 5.69521  | 1.320529 | 0.188187 | 0.300017 | -6.21355 |
| JAK1      | -0.21541 | 7.701987 | -1.32035 | 0.188248 | 0.30008  | -6.23728 |
| EXT2      | 0.203252 | 6.240406 | 1.320222 | 0.188289 | 0.300112 | -6.24667 |
| COX8A     | -0.24595 | 7.089709 | -1.3194  | 0.188563 | 0.300514 | -6.252   |
| NUP210    | 0.697706 | 6.200489 | 1.318895 | 0.188732 | 0.300749 | -6.22102 |
| C2orf24   | -0.22712 | 5.669399 | -1.31836 | 0.18891  | 0.300964 | -6.24067 |
| CLDND1    | 0.330361 | 6.503135 | 1.318401 | 0.188897 | 0.300964 | -6.25398 |
| ZNF37B    | -0.33585 | 3.964091 | -1.31823 | 0.188956 | 0.301002 | -6.07075 |
| C16orf74  | 1.068539 | 1.865165 | 1.31808  | 0.189004 | 0.30101  | -5.43141 |
| MKS1      | 0.250662 | 3.342642 | 1.318125 | 0.188989 | 0.30101  | -5.82776 |
| C4orf23   | -0.23738 | 3.169371 | -1.31788 | 0.18907  | 0.301081 | -5.88694 |
| MAMDC4    | -0.46827 | 1.914407 | -1.31719 | 0.189302 | 0.301417 | -5.66454 |
| KIF21B    | 0.670921 | 3.744306 | 1.317018 | 0.189359 | 0.301473 | -5.83145 |
| CEACAM1   | 1.097733 | 5.25849  | 1.316745 | 0.189451 | 0.301584 | -6.07199 |
| ING1      | 0.226572 | 4.267821 | 1.316378 | 0.189573 | 0.301691 | -6.03721 |
| GPR153    | 0.598374 | 5.419018 | 1.316306 | 0.189598 | 0.301691 | -6.15903 |
| NUP54     | 0.191694 | 5.366448 | 1.316286 | 0.189604 | 0.301691 | -6.1922  |
| TXNDC5    | -0.27034 | 8.01877  | -1.31633 | 0.189588 | 0.301691 | -6.23136 |
| IL28RA    | 0.496173 | 3.684376 | 1.315869 | 0.189744 | 0.301741 | -5.85824 |
| ZNF584    | -0.24072 | 3.189321 | -1.3159  | 0.189734 | 0.301741 | -5.89518 |
| ZNF434    | -0.15304 | 4.067921 | -1.31601 | 0.189698 | 0.301741 | -6.06366 |
| MYST1     | -0.18787 | 4.548912 | -1.31599 | 0.189702 | 0.301741 | -6.13884 |
| TIMM17A   | 0.179336 | 5.815766 | 1.31599  | 0.189703 | 0.301741 | -6.23113 |
| TP53BP1   | 0.191644 | 5.715056 | 1.315408 | 0.189899 | 0.301953 | -6.22374 |
| RAMP2     | -0.38895 | 3.661386 | -1.31524 | 0.189954 | 0.301972 | -6.02672 |
| DUSP8     | -0.45526 | 4.163552 | -1.31528 | 0.189942 | 0.301972 | -6.11877 |
| NSUN5P2   | -0.29944 | 3.63714  | -1.31494 | 0.190054 | 0.302097 | -6.00296 |
| C13orf18  | 0.664669 | 0.98752  | 1.314571 | 0.190179 | 0.302262 | -5.35996 |
| ZNF789    | 0.429056 | 2.31631  | 1.313338 | 0.190593 | 0.302885 | -5.60209 |
| SOCS5     | -0.17827 | 5.133128 | -1.31282 | 0.190769 | 0.30313  | -6.20616 |
| TPMT      | 0.313652 | 5.178359 | 1.312547 | 0.190859 | 0.303239 | -6.16477 |
| ZNF771    | 0.321984 | 2.558161 | 1.312348 | 0.190926 | 0.303311 | -5.66449 |
| PLEC      | 0.355321 | 10.88259 | 1.311956 | 0.191058 | 0.303476 | -6.15713 |
| RPS29     | 0.256665 | 7.72615  | 1.311912 | 0.191073 | 0.303476 | -6.25781 |
| CCDC92    | -0.27076 | 5.225231 | -1.31128 | 0.191286 | 0.30378  | -6.22317 |
| RARB      | -0.53397 | 2.623547 | -1.31113 | 0.191337 | 0.303826 | -5.83731 |
| MYCBP     | 0.205626 | 5.174288 | 1.310479 | 0.191556 | 0.304138 | -6.17831 |
| TAOK3     | -0.2604  | 5.871185 | -1.31042 | 0.191577 | 0.304138 | -6.26098 |
| ARHGAP15  | -0.52137 | 1.018495 | -1.31031 | 0.191613 | 0.30415  | -5.53163 |
| ROCK2     | -0.30117 | 6.10326  | -1.31027 | 0.191628 | 0.30415  | -6.26852 |
| EEF1E1    | 0.293554 | 3.975691 | 1.309447 | 0.191905 | 0.30455  | -5.97164 |
| AGGF1     | -0.15806 | 5.322468 | -1.30939 | 0.191924 | 0.30455  | -6.22514 |
| STAG3L1   | 0.384905 | 2.464623 | 1.30902  | 0.192049 | 0.304714 | -5.64082 |
| APH1B     | -0.30708 | 3.19482  | -1.30891 | 0.192085 | 0.304736 | -5.91703 |
| ZNF45     | -0.23611 | 3.376738 | -1.30865 | 0.192176 | 0.304811 | -5.94469 |
| TANC1     | -0.22902 | 6.350453 | -1.30869 | 0.19216  | 0.304811 | -6.27325 |
| YTHDF2    | 0.158491 | 6.431489 | 1.307296 | 0.192633 | 0.305501 | -6.27063 |
| CDK8      | -0.23868 | 3.750616 | -1.30616 | 0.19302  | 0.306069 | -6.02938 |
| TMEM54    | 0.360921 | 6.04983  | 1.30611  | 0.193035 | 0.306069 | -6.24823 |
| ZNF697    | 0.403376 | 3.316554 | 1.305873 | 0.193115 | 0.306142 | -5.8064  |
| C14orf118 | -0.20647 | 3.785626 | -1.30574 | 0.19316  | 0.306142 | -6.03147 |
| MLL       | -0.2117  | 7.109391 | -1.30572 | 0.193168 | 0.306142 | -6.27001 |

|            |       |          |          |          |          |          |          |
|------------|-------|----------|----------|----------|----------|----------|----------|
| PHC3       |       | -0.26135 | 6.805061 | -1.30578 | 0.193146 | 0.306142 | -6.27451 |
| CEL        |       | 1.418543 | 1.633554 | 1.305095 | 0.19338  | 0.306442 | -5.36617 |
| LPIN1      |       | -0.37621 | 5.552644 | -1.30501 | 0.193409 | 0.306454 | -6.25881 |
| MRPL44     |       | 0.174592 | 4.517418 | 1.30394  | 0.193772 | 0.306981 | -6.10535 |
| SNX11      |       | -0.1509  | 4.390578 | -1.3039  | 0.193785 | 0.306981 | -6.12939 |
| COBRA1     |       | 0.197053 | 6.219397 | 1.303612 | 0.193884 | 0.307102 | -6.26761 |
| LOC652276  |       | 0.273543 | 1.639038 | 1.303172 | 0.194034 | 0.307304 | -5.5246  |
| PTAR1      |       | -0.23804 | 5.988757 | -1.30309 | 0.19406  | 0.307312 | -6.27373 |
| PTCD3      |       | 0.160775 | 5.88719  | 1.30299  | 0.194096 | 0.307333 | -6.25349 |
| PGRMC1     |       | 0.21274  | 6.842832 | 1.302819 | 0.194154 | 0.30739  | -6.28127 |
| FCGR2B     |       | -0.63798 | 1.269822 | -1.30264 | 0.194217 | 0.307455 | -5.60143 |
| GTF3C4     |       | 0.257307 | 4.983027 | 1.302481 | 0.194269 | 0.307503 | -6.16106 |
| SLC25A24   |       | 0.272448 | 6.117243 | 1.300483 | 0.194951 | 0.308548 | -6.26384 |
| FAM125A    |       | 0.22327  | 4.471431 | 1.300305 | 0.195012 | 0.308609 | -6.09552 |
| ENTPD3     |       | -0.74203 | 2.749294 | -1.30011 | 0.195077 | 0.308678 | -5.91621 |
| C11orf1    |       | -0.30625 | 3.565722 | -1.29996 | 0.195129 | 0.308724 | -6.0101  |
|            | 3-Sep | 0.896543 | 1.951342 | 1.299309 | 0.195353 | 0.309044 | -5.4917  |
| IL15       |       | 0.500828 | 1.912867 | 1.299157 | 0.195405 | 0.309091 | -5.54299 |
| PRUNE      |       | 0.200186 | 5.046958 | 1.299043 | 0.195444 | 0.309118 | -6.17935 |
| MST1P2     |       | -0.52322 | 1.392292 | -1.29888 | 0.1955   | 0.30917  | -5.6055  |
| SYNCRIP    |       | 0.171695 | 7.780005 | 1.298817 | 0.195522 | 0.30917  | -6.27187 |
| DUSP23     |       | 0.505245 | 4.271408 | 1.298665 | 0.195574 | 0.309218 | -6.00886 |
| MRPS11     |       | 0.204635 | 4.620464 | 1.298444 | 0.19565  | 0.309286 | -6.12395 |
| PROSC      |       | -0.28862 | 5.778153 | -1.29841 | 0.195661 | 0.309286 | -6.27391 |
| TTC21B     |       | -0.24149 | 4.00456  | -1.29822 | 0.195726 | 0.309353 | -6.0895  |
| HSD3B7     |       | 0.394238 | 4.796803 | 1.297985 | 0.195807 | 0.309446 | -6.1251  |
| ZNF627     |       | -0.18998 | 3.638646 | -1.29792 | 0.19583  | 0.309447 | -6.00655 |
| YIPF2      |       | 0.21671  | 5.119704 | 1.297679 | 0.195912 | 0.309542 | -6.18734 |
| LEPREL2    |       | -0.45868 | 3.409845 | -1.29731 | 0.196038 | 0.309707 | -6.00951 |
| AP2A1      |       | 0.171762 | 7.125419 | 1.2972   | 0.196076 | 0.309732 | -6.2865  |
| SCAF1      |       | 0.174314 | 7.193917 | 1.297116 | 0.196105 | 0.309742 | -6.28565 |
| CYGB       |       | -0.40392 | 4.059805 | -1.29621 | 0.196415 | 0.310197 | -6.12319 |
| S100A8     |       | 1.727356 | 6.546595 | 1.296101 | 0.196454 | 0.310223 | -6.19515 |
| RDH13      |       | -0.339   | 3.99719  | -1.29594 | 0.196509 | 0.310274 | -6.10423 |
| MTCP1NB    |       | -0.25376 | 2.988157 | -1.29529 | 0.196733 | 0.310593 | -5.87936 |
| ZNF597     |       | -0.47439 | 1.203487 | -1.29502 | 0.196827 | 0.310707 | -5.57373 |
| PIK3C2B    |       | -0.39812 | 5.763357 | -1.29484 | 0.196887 | 0.310767 | -6.28147 |
| C7orf68    |       | 0.536571 | 3.459319 | 1.294074 | 0.197152 | 0.311149 | -5.83069 |
| C17orf59   |       | -0.21031 | 3.094722 | -1.29338 | 0.197391 | 0.311492 | -5.89605 |
| ABCC2      |       | 1.088004 | 0.552689 | 1.292522 | 0.197687 | 0.311924 | -5.27421 |
| ADPRHL2    |       | 0.205147 | 4.339635 | 1.292171 | 0.197808 | 0.31208  | -6.0864  |
| MRPL38     |       | 0.208445 | 5.710776 | 1.291903 | 0.197901 | 0.31219  | -6.25262 |
| LOC728024  |       | 0.223192 | 0.039323 | 1.291544 | 0.198025 | 0.312351 | -5.3107  |
| TYK2       |       | 0.178076 | 6.229329 | 1.291478 | 0.198048 | 0.312352 | -6.28422 |
| SPRY4      |       | 0.437743 | 5.261789 | 1.290661 | 0.198331 | 0.312762 | -6.18954 |
| PPARG      |       | -0.81967 | 3.116832 | -1.28991 | 0.198591 | 0.313138 | -6.0189  |
| SYT7       |       | 0.939957 | 3.858522 | 1.289801 | 0.198629 | 0.313162 | -5.84084 |
| IER2       |       | 0.290513 | 6.942996 | 1.289624 | 0.19869  | 0.313223 | -6.29818 |
| DUSP6      |       | 0.430671 | 6.178699 | 1.289429 | 0.198757 | 0.313294 | -6.2737  |
| MED29      |       | -0.16023 | 5.822148 | -1.28933 | 0.198791 | 0.313312 | -6.28268 |
| ACTR3C     |       | -0.49373 | 0.861126 | -1.28821 | 0.199181 | 0.313891 | -5.52695 |
| COL15A1    |       | -0.49038 | 6.303362 | -1.2881  | 0.199219 | 0.313915 | -6.30001 |
| MYO9B      |       | 0.181417 | 7.259159 | 1.288025 | 0.199245 | 0.313921 | -6.29634 |
| GEMIN8     |       | -0.22531 | 3.572087 | -1.28789 | 0.199291 | 0.313959 | -6.01063 |
| LOC283267  |       | -0.26329 | 3.828458 | -1.2876  | 0.199394 | 0.314085 | -6.07389 |
| BHLHB9     |       | -0.34114 | 2.2452   | -1.28738 | 0.199468 | 0.314166 | -5.7489  |
| NCRNA00085 |       | -0.5129  | 0.182725 | -1.28642 | 0.199803 | 0.314658 | -5.43017 |
| C10orf28   |       | 0.175925 | 4.372275 | 1.286305 | 0.199843 | 0.314686 | -6.10351 |

|          |          |          |          |          |          |          |
|----------|----------|----------|----------|----------|----------|----------|
| TCEB2    | 0.231819 | 6.398954 | 1.285959 | 0.199964 | 0.31484  | -6.29538 |
| C12orf26 | -0.22593 | 1.482208 | -1.28581 | 0.200014 | 0.314884 | -5.59549 |
| SERPINE2 | 0.759338 | 5.279423 | 1.285393 | 0.200161 | 0.315079 | -6.16375 |
| RHOQ     | -0.27438 | 5.633798 | -1.28527 | 0.200203 | 0.31511  | -6.28384 |
| FN3KRP   | 0.241859 | 4.499653 | 1.285068 | 0.200274 | 0.315187 | -6.11664 |
| MRPL50   | 0.230507 | 4.675449 | 1.284999 | 0.200298 | 0.315189 | -6.1456  |
| TBC1D25  | -0.20914 | 4.647108 | -1.28489 | 0.200335 | 0.315212 | -6.1935  |
| ZSWIM7   | -0.20211 | 2.958499 | -1.28467 | 0.200412 | 0.315262 | -5.87472 |
| CREBBP   | -0.18199 | 7.59745  | -1.28472 | 0.200394 | 0.315262 | -6.28677 |
| SPIN1    | -0.17809 | 6.751424 | -1.28373 | 0.200743 | 0.315747 | -6.30454 |
| ZFHx4    | -0.71273 | 2.230232 | -1.28346 | 0.200836 | 0.315786 | -5.82125 |
| BANP     | 0.169188 | 3.497037 | 1.283534 | 0.20081  | 0.315786 | -5.92374 |
| TTC31    | 0.159015 | 4.733445 | 1.283485 | 0.200827 | 0.315786 | -6.16444 |
| MRPL55   | 0.221136 | 4.29036  | 1.283229 | 0.200916 | 0.315841 | -6.08438 |
| VPS41    | -0.19245 | 5.882946 | -1.28325 | 0.200909 | 0.315841 | -6.29418 |
| ZC3H12C  | -0.44667 | 4.488968 | -1.28315 | 0.200944 | 0.315849 | -6.20185 |
| ESRRA    | -0.25743 | 5.71216  | -1.28233 | 0.20123  | 0.316264 | -6.29037 |
| PIIG     | -0.23174 | 6.487714 | -1.28216 | 0.20129  | 0.316322 | -6.30789 |
| PARP8    | -0.34467 | 3.981823 | -1.28181 | 0.201412 | 0.316478 | -6.1202  |
| SEC24C   | -0.19666 | 7.130493 | -1.28166 | 0.201466 | 0.316528 | -6.30068 |
| HOXC4    | -0.41139 | 2.125919 | -1.28149 | 0.201523 | 0.316582 | -5.74241 |
| FYN      | -0.34886 | 4.461907 | -1.28101 | 0.201694 | 0.316815 | -6.19052 |
| LDB1     | -0.23335 | 5.899671 | -1.28086 | 0.201746 | 0.316861 | -6.29917 |
| LRRN2    | -0.67906 | 1.315125 | -1.2806  | 0.201838 | 0.31697  | -5.6467  |
| SEPX1    | 0.357535 | 4.875494 | 1.280529 | 0.201861 | 0.316971 | -6.16437 |
| TBC1D24  | -0.23535 | 4.083085 | -1.27998 | 0.202056 | 0.317241 | -6.12356 |
| COASY    | 0.186976 | 6.237536 | 1.279726 | 0.202143 | 0.317342 | -6.29919 |
| HSPA4    | 0.203908 | 6.978834 | 1.279385 | 0.202263 | 0.317494 | -6.31097 |
| ADAMTS10 | -0.44664 | 1.763066 | -1.27909 | 0.202368 | 0.317624 | -5.68613 |
| ASB13    | 0.329457 | 4.32264  | 1.278405 | 0.202607 | 0.317928 | -6.07751 |
| MAEA     | -0.22079 | 6.075112 | -1.27846 | 0.202587 | 0.317928 | -6.3071  |
| IQGAP1   | 0.241761 | 9.015124 | 1.27815  | 0.202697 | 0.317998 | -6.26167 |
| ZNF609   | -0.20259 | 6.324185 | -1.2782  | 0.20268  | 0.317998 | -6.31177 |
| FDPSL2A  | 0.466248 | 1.127098 | 1.277913 | 0.202781 | 0.318093 | -5.44826 |
| ARHGAP26 | -0.48565 | 5.27457  | -1.27753 | 0.202917 | 0.318234 | -6.28309 |
| RALB     | 0.278061 | 6.291383 | 1.277584 | 0.202897 | 0.318234 | -6.30082 |
| CEBPB    | 0.353961 | 7.247771 | 1.277097 | 0.203068 | 0.318436 | -6.31255 |
| CASP8AP2 | 0.221849 | 5.045808 | 1.276939 | 0.203124 | 0.318488 | -6.20492 |
| YBX1     | 0.196332 | 8.486528 | 1.276517 | 0.203272 | 0.318685 | -6.28075 |
| EID2     | 0.206186 | 3.396566 | 1.275938 | 0.203477 | 0.318948 | -5.90426 |
| PTK2     | 0.210061 | 7.005545 | 1.275912 | 0.203486 | 0.318948 | -6.31522 |
| RPS13    | -0.26845 | 7.734    | -1.275   | 0.203807 | 0.319416 | -6.29327 |
| ATPBD4   | 0.242386 | 3.141939 | 1.274898 | 0.203844 | 0.319437 | -5.84105 |
| GDF11    | 0.415511 | 2.993987 | 1.274492 | 0.203987 | 0.319626 | -5.78047 |
| GPSM3    | 0.446806 | 3.00092  | 1.274265 | 0.204068 | 0.319716 | -5.77498 |
| CNTLN    | -0.57024 | 2.613413 | -1.27399 | 0.204166 | 0.31981  | -5.88832 |
| EIF4G1   | 0.2349   | 9.308001 | 1.273921 | 0.204189 | 0.31981  | -6.2565  |
| DNM1L    | 0.191881 | 6.671857 | 1.273902 | 0.204196 | 0.31981  | -6.31709 |
| CRTC3    | -0.206   | 6.054578 | -1.27364 | 0.204289 | 0.31992  | -6.31237 |
| C10orf99 | 2.331864 | 1.125126 | 1.273542 | 0.204323 | 0.319938 | -5.28606 |
| GJA5     | -0.48432 | 2.606312 | -1.27338 | 0.20438  | 0.319991 | -5.86733 |
| BICD2    | 0.522622 | 6.937106 | 1.273287 | 0.204413 | 0.320007 | -6.3171  |
| TCTN2    | 0.319872 | 3.82238  | 1.272257 | 0.204778 | 0.320542 | -5.97967 |
| RNF6     | 0.208689 | 6.003336 | 1.271651 | 0.204993 | 0.320843 | -6.29775 |
| TYW1B    | 0.354262 | 1.888283 | 1.271428 | 0.205072 | 0.320931 | -5.59515 |
| ACSF3    | -0.19915 | 4.077304 | -1.27128 | 0.205126 | 0.320979 | -6.12873 |
| GJB6     | 2.948224 | 3.546531 | 1.2712   | 0.205153 | 0.320986 | -5.48621 |
| PNMA2    | -0.78893 | 1.441747 | -1.27091 | 0.205255 | 0.321109 | -5.69008 |

|           |          |          |          |          |          |          |
|-----------|----------|----------|----------|----------|----------|----------|
| NADSYN1   | 0.349516 | 5.774148 | 1.269706 | 0.205684 | 0.321744 | -6.27554 |
| ZBTB8OS   | 0.230966 | 3.421556 | 1.269377 | 0.205801 | 0.321891 | -5.91099 |
| MCM9      | 0.22959  | 2.157542 | 1.269233 | 0.205852 | 0.321935 | -5.66118 |
| A4GALT    | -0.55644 | 4.277107 | -1.269   | 0.205934 | 0.322026 | -6.20656 |
| DOCK9     | -0.3035  | 6.695982 | -1.26885 | 0.205988 | 0.322075 | -6.32263 |
| BCAN      | 0.889751 | 0.495682 | 1.268638 | 0.206064 | 0.322158 | -5.31772 |
| NPHP1     | -0.45059 | 1.263004 | -1.26838 | 0.206157 | 0.322268 | -5.61365 |
| UBR7      | -0.18731 | 5.517278 | -1.26757 | 0.206445 | 0.322681 | -6.29493 |
| LY75      | 0.779777 | 5.238466 | 1.267177 | 0.206585 | 0.322864 | -6.17672 |
| C14orf104 | 0.212409 | 3.84371  | 1.267068 | 0.206624 | 0.322889 | -6.01212 |
| OSGIN2    | 0.249234 | 4.768485 | 1.26644  | 0.206848 | 0.323202 | -6.18048 |
| WDR36     | 0.188491 | 5.938399 | 1.266204 | 0.206932 | 0.323298 | -6.30186 |
| PRKACA    | -0.16416 | 6.044729 | -1.26612 | 0.206962 | 0.323309 | -6.32054 |
| NPW       | 1.080251 | 1.471912 | 1.265768 | 0.207088 | 0.323469 | -5.43444 |
| ARL10     | -0.50311 | 1.310091 | -1.26539 | 0.207221 | 0.323642 | -5.63507 |
| DCAF7     | 0.190115 | 7.297752 | 1.265308 | 0.207252 | 0.323654 | -6.32454 |
| HMGCS1    | 0.379358 | 6.754406 | 1.264693 | 0.207472 | 0.323961 | -6.32722 |
| TMEM63B   | 0.316097 | 6.622987 | 1.263602 | 0.207863 | 0.324535 | -6.32728 |
| MTP18     | 0.306687 | 3.801893 | 1.263306 | 0.207969 | 0.324664 | -5.98696 |
| ZDHHC5    | 0.192064 | 7.662569 | 1.263018 | 0.208072 | 0.324789 | -6.32029 |
| IMPA2     | -0.42171 | 5.754111 | -1.26282 | 0.208144 | 0.324865 | -6.32244 |
| CD7       | 0.654516 | 2.683057 | 1.262642 | 0.208207 | 0.324927 | -5.69609 |
| GPRC5A    | 0.904905 | 6.882137 | 1.262205 | 0.208364 | 0.325135 | -6.32025 |
| TMEM42    | -0.21906 | 2.145667 | -1.26211 | 0.208397 | 0.32515  | -5.73737 |
| C8orf4    | -0.66723 | 3.864062 | -1.26185 | 0.208492 | 0.325263 | -6.17259 |
| SLC6A8    | 0.495094 | 7.008693 | 1.261604 | 0.20858  | 0.325363 | -6.33283 |
| DHX15     | 0.159531 | 7.265193 | 1.261526 | 0.208608 | 0.325371 | -6.32937 |
| RNF181    | 0.223205 | 5.199107 | 1.261098 | 0.208762 | 0.325574 | -6.24201 |
| XG        | 1.233078 | 1.101366 | 1.260855 | 0.208849 | 0.325638 | -5.37015 |
| GABRE     | 1.375751 | 3.391937 | 1.260858 | 0.208848 | 0.325638 | -5.71424 |
| STK19     | -0.21035 | 2.819013 | -1.26066 | 0.208918 | 0.325709 | -5.87582 |
| GMIP      | 0.302961 | 4.966461 | 1.260221 | 0.209077 | 0.325884 | -6.20631 |
| TMEM64    | -0.3083  | 4.93755  | -1.26022 | 0.209076 | 0.325884 | -6.26538 |
| PADI1     | 1.64111  | 0.569989 | 1.259497 | 0.209338 | 0.326254 | -5.29981 |
| ANGPT1    | -0.57394 | 1.917903 | -1.25923 | 0.209436 | 0.32637  | -5.75946 |
| TNC       | 0.872583 | 7.991853 | 1.258634 | 0.209649 | 0.326666 | -6.33103 |
| SFRP2     | -1.13863 | 4.830661 | -1.25799 | 0.209881 | 0.326955 | -6.3146  |
| GALNT2    | 0.252943 | 7.196224 | 1.258019 | 0.209871 | 0.326955 | -6.33606 |
| C3orf38   | -0.19087 | 4.231881 | -1.25764 | 0.210009 | 0.327099 | -6.17036 |
| CFB       | 0.870977 | 6.261325 | 1.257605 | 0.21002  | 0.327099 | -6.2909  |
| ZKSCAN5   | 0.256005 | 4.23907  | 1.25718  | 0.210174 | 0.327301 | -6.10098 |
| FNDC3B    | 0.304753 | 7.312322 | 1.2568   | 0.210311 | 0.327479 | -6.33655 |
| CHI3L2    | 1.058987 | 0.089879 | 1.256625 | 0.210374 | 0.327541 | -5.30029 |
| C9orf85   | 0.207607 | 2.73735  | 1.256529 | 0.210409 | 0.327558 | -5.78593 |
| BBS9      | -0.23034 | 3.561195 | -1.25646 | 0.210435 | 0.327563 | -6.05159 |
| TJP1      | -0.25203 | 7.489968 | -1.25638 | 0.210461 | 0.327567 | -6.32352 |
| PARP3     | -0.29939 | 3.926119 | -1.25626 | 0.210506 | 0.3276   | -6.13749 |
| C1orf25   | -0.16868 | 4.523808 | -1.25512 | 0.21092  | 0.328208 | -6.21094 |
| USPL1     | -0.2436  | 4.821215 | -1.25442 | 0.211172 | 0.328563 | -6.25444 |
| ABHD8     | -0.30209 | 3.404544 | -1.25434 | 0.2112   | 0.32857  | -6.03327 |
| GOLPH3L   | -0.26175 | 5.278222 | -1.25428 | 0.211224 | 0.328571 | -6.2988  |
| ARPP19    | -0.19534 | 7.921158 | -1.25393 | 0.211351 | 0.328732 | -6.31603 |
| TCF7      | 0.505438 | 4.29039  | 1.253725 | 0.211425 | 0.328804 | -6.06569 |
| POLR2C    | 0.175922 | 5.804351 | 1.25367  | 0.211444 | 0.328804 | -6.30982 |
| CAPN3     | -0.41709 | 2.011365 | -1.25339 | 0.211546 | 0.328925 | -5.7563  |
| ZCCHC8    | 0.162744 | 4.761717 | 1.253291 | 0.211582 | 0.328944 | -6.20567 |
| STAU1     | 0.150105 | 7.550156 | 1.252741 | 0.211782 | 0.329218 | -6.3347  |
| RPL14     | -0.27817 | 6.986325 | -1.25252 | 0.21186  | 0.329304 | -6.33862 |

|           |          |          |          |          |          |          |
|-----------|----------|----------|----------|----------|----------|----------|
| CTAGE5    | -0.26766 | 5.744171 | -1.25245 | 0.211888 | 0.32931  | -6.32969 |
| PPP2R3B   | 0.361089 | 3.043577 | 1.252327 | 0.211932 | 0.329342 | -5.82666 |
| ZNF669    | 0.252978 | 2.559621 | 1.251984 | 0.212057 | 0.3295   | -5.75035 |
| FHOD3     | -0.67617 | 2.594251 | -1.25191 | 0.212083 | 0.329504 | -5.93528 |
| SRXN1     | 0.481146 | 6.405349 | 1.251756 | 0.21214  | 0.329555 | -6.33017 |
| SLC35A5   | -0.19614 | 4.798836 | -1.25149 | 0.212236 | 0.329668 | -6.25101 |
| PPFIA4    | 0.897125 | 0.280454 | 1.251194 | 0.212344 | 0.329799 | -5.31417 |
| C12orf10  | 0.194628 | 4.444083 | 1.251017 | 0.212409 | 0.329863 | -6.15766 |
| PHLDA1    | -0.45176 | 7.109847 | -1.25075 | 0.212507 | 0.329905 | -6.33515 |
| DPYSL2    | -0.35654 | 6.202139 | -1.25085 | 0.212469 | 0.329905 | -6.34611 |
| PPFIBP1   | -0.31001 | 6.356766 | -1.2508  | 0.212489 | 0.329905 | -6.34704 |
| FAM53B    | -0.24596 | 5.980565 | -1.25065 | 0.212544 | 0.329926 | -6.34001 |
| USP27X    | -0.28936 | 1.822217 | -1.25051 | 0.212592 | 0.329964 | -5.70693 |
| IMPAD1    | -0.16401 | 7.488167 | -1.25021 | 0.212703 | 0.330099 | -6.33311 |
| PRPF4B    | -0.19303 | 6.614675 | -1.25006 | 0.212759 | 0.33015  | -6.34786 |
| TOP3A     | 0.19913  | 4.868531 | 1.249865 | 0.212829 | 0.330221 | -6.21961 |
| NCS1      | -0.54267 | 5.269159 | -1.24977 | 0.212864 | 0.330239 | -6.32133 |
| FAM100A   | -0.1795  | 4.914396 | -1.24961 | 0.21292  | 0.33029  | -6.26438 |
| ALG5      | -0.25906 | 4.468064 | -1.24948 | 0.212967 | 0.330326 | -6.21997 |
| PLA2G4A   | 0.759501 | 3.768504 | 1.249352 | 0.213016 | 0.330328 | -5.90614 |
| LRP6      | -0.2977  | 5.795039 | -1.24939 | 0.213003 | 0.330328 | -6.33678 |
| SACS      | -0.39272 | 5.027461 | -1.24923 | 0.213059 | 0.330359 | -6.29441 |
| C20orf108 | -0.3166  | 6.502081 | -1.24903 | 0.213131 | 0.330434 | -6.34907 |
| EXTL2     | -0.2918  | 3.673165 | -1.24863 | 0.21328  | 0.330628 | -6.09589 |
| CYB5R4    | 0.234346 | 4.293326 | 1.248547 | 0.213309 | 0.330637 | -6.12632 |
| CTTNBP2NL | 0.220449 | 5.863755 | 1.248205 | 0.213434 | 0.330794 | -6.31806 |
| GJB1      | -1.39962 | 0.549483 | -1.24794 | 0.213531 | 0.330907 | -5.64765 |
| IWS1      | 0.144914 | 5.738788 | 1.247863 | 0.213559 | 0.330914 | -6.31431 |
| SELPLG    | 0.526699 | 3.404103 | 1.247543 | 0.213676 | 0.331021 | -5.87721 |
| SIPA1     | 0.272506 | 5.364712 | 1.247553 | 0.213672 | 0.331021 | -6.27198 |
| C1orf97   | 0.420031 | 2.131324 | 1.247172 | 0.213812 | 0.331158 | -5.65259 |
| ERGIC3    | 0.225701 | 7.643314 | 1.247232 | 0.21379  | 0.331158 | -6.34095 |
| DSE       | 0.451215 | 5.018849 | 1.247039 | 0.213861 | 0.331197 | -6.21413 |
| GIPC1     | 0.287341 | 7.148316 | 1.246672 | 0.213995 | 0.331361 | -6.35109 |
| MKRN1     | -0.18009 | 6.463124 | -1.24662 | 0.214014 | 0.331361 | -6.35225 |
| ZC3H12D   | 0.746016 | 1.108214 | 1.246433 | 0.214083 | 0.331401 | -5.44692 |
| GNAS      | -0.20155 | 9.969769 | -1.24636 | 0.214111 | 0.331401 | -6.25484 |
| SLPI      | 0.805552 | 6.481952 | 1.246359 | 0.214109 | 0.331401 | -6.32522 |
| MAP2K6    | 0.656002 | 2.116424 | 1.245535 | 0.214411 | 0.331829 | -5.61766 |
| UBE2M     | 0.233291 | 5.338828 | 1.245285 | 0.214503 | 0.331935 | -6.27575 |
| RER1      | -0.19551 | 6.45977  | -1.24492 | 0.214637 | 0.332106 | -6.35438 |
| RBM23     | -0.1463  | 5.746422 | -1.24337 | 0.215207 | 0.33295  | -6.33614 |
| SMYD3     | 0.351816 | 3.078306 | 1.243249 | 0.21525  | 0.33298  | -5.84647 |
| ADORA3    | 0.565852 | 0.86358  | 1.242891 | 0.215382 | 0.333147 | -5.4411  |
| IMMP1L    | 0.238027 | 1.626896 | 1.242481 | 0.215533 | 0.333344 | -5.60242 |
| FLJ40330  | -0.7818  | 0.012885 | -1.24217 | 0.215646 | 0.333445 | -5.49012 |
| OSBPL2    | -0.2209  | 6.131202 | -1.24219 | 0.21564  | 0.333445 | -6.35375 |
| CCR6      | 0.585683 | 1.565569 | 1.242009 | 0.215707 | 0.333502 | -5.54257 |
| KIAA1257  | 0.709799 | 0.23107  | 1.241816 | 0.215778 | 0.333575 | -5.33804 |
| CASP6     | 0.307397 | 3.56775  | 1.241504 | 0.215892 | 0.333712 | -5.96067 |
| SDF2      | 0.194171 | 4.952176 | 1.241445 | 0.215914 | 0.333712 | -6.24074 |
| TRIM17    | 0.529486 | 0.188802 | 1.241057 | 0.216057 | 0.333799 | -5.3555  |
| TMEM81    | 0.258725 | 0.992105 | 1.241107 | 0.216039 | 0.333799 | -5.50113 |
| PARVG     | 0.569662 | 2.163403 | 1.240966 | 0.216091 | 0.333799 | -5.64605 |
| RNF139    | 0.213195 | 5.487522 | 1.240903 | 0.216114 | 0.333799 | -6.29731 |
| FLT1      | -0.3986  | 5.361603 | -1.24121 | 0.216    | 0.333799 | -6.32935 |
| RAB10     | 0.257859 | 8.072972 | 1.24094  | 0.2161   | 0.333799 | -6.33926 |
| PPP1R2    | 0.187951 | 6.122869 | 1.240418 | 0.216293 | 0.334038 | -6.34355 |



|              |          |          |          |          |          |          |
|--------------|----------|----------|----------|----------|----------|----------|
| MSL3         | 0.182682 | 4.824279 | 1.239695 | 0.21656  | 0.334414 | -6.2284  |
| C1orf116     | -0.73081 | 6.421258 | -1.23944 | 0.216652 | 0.334519 | -6.35718 |
| TRIM7        | 0.897936 | 3.299706 | 1.239357 | 0.216685 | 0.334532 | -5.7983  |
| C14orf142    | 0.207703 | 3.226862 | 1.239176 | 0.216751 | 0.334599 | -5.90931 |
| ANGEL1       | -0.20851 | 5.122913 | -1.23889 | 0.216859 | 0.334727 | -6.30043 |
| RBM26        | -0.18679 | 5.911157 | -1.23857 | 0.216976 | 0.334871 | -6.35084 |
| GDA          | 1.986803 | 3.053679 | 1.237971 | 0.217197 | 0.335175 | -5.57905 |
| CLEC2B       | 0.75129  | 3.431685 | 1.237774 | 0.21727  | 0.33525  | -5.85657 |
| IRS1         | -0.38663 | 6.002127 | -1.23729 | 0.217448 | 0.335451 | -6.36004 |
| LGMN         | -0.25423 | 6.60165  | -1.23731 | 0.217443 | 0.335451 | -6.3633  |
| ARL16        | -0.206   | 3.703507 | -1.23716 | 0.217499 | 0.335493 | -6.10097 |
| LSAMP        | -0.59513 | 1.347066 | -1.23639 | 0.217782 | 0.335892 | -5.68772 |
| DCP2         | 0.211132 | 5.443608 | 1.236315 | 0.21781  | 0.335899 | -6.29882 |
| AOAH         | 0.76457  | 1.259767 | 1.236067 | 0.217902 | 0.33593  | -5.4794  |
| ZNF92        | 0.297146 | 3.820187 | 1.236144 | 0.217874 | 0.33593  | -6.02875 |
| ZHX1         | -0.25412 | 5.852996 | -1.23612 | 0.217883 | 0.33593  | -6.35388 |
| BCL9L        | 0.225084 | 7.516201 | 1.235743 | 0.218023 | 0.336066 | -6.35769 |
| MRC2         | -0.46548 | 6.435285 | -1.2357  | 0.218039 | 0.336066 | -6.36492 |
| PRKD3        | -0.30053 | 5.442828 | -1.2345  | 0.218485 | 0.336717 | -6.33752 |
| KRT14        | 3.797867 | 6.2088   | 1.23419  | 0.218599 | 0.336856 | -5.85395 |
| C12orf45     | 0.281087 | 2.779265 | 1.233822 | 0.218736 | 0.336992 | -5.80778 |
| BHLHE41      | 0.658381 | 4.594926 | 1.233868 | 0.218719 | 0.336992 | -6.12854 |
| LRRC16A      | 0.329592 | 5.589869 | 1.233276 | 0.218939 | 0.337268 | -6.30578 |
| NDUFB6       | -0.21133 | 4.68019  | -1.23306 | 0.219021 | 0.337356 | -6.26161 |
| MAN2A1       | -0.29391 | 5.408722 | -1.23278 | 0.219126 | 0.33748  | -6.33675 |
| LOC100130557 | -0.31799 | 0.903048 | -1.23257 | 0.219203 | 0.337491 | -5.57784 |
| ANXA9        | -0.70032 | 1.575823 | -1.23256 | 0.219205 | 0.337491 | -5.74878 |
| CCND2        | -0.58358 | 6.00679  | -1.23258 | 0.219196 | 0.337491 | -6.36838 |
| RASGRP1      | 0.646596 | 3.031778 | 1.232309 | 0.219299 | 0.337599 | -5.79877 |
| C2orf44      | 0.206746 | 3.505045 | 1.232095 | 0.219379 | 0.337685 | -5.98086 |
| ZBTB48       | -0.20096 | 3.769226 | -1.23158 | 0.219569 | 0.337866 | -6.12015 |
| PTPRH        | -0.97688 | 3.505753 | -1.23163 | 0.219552 | 0.337866 | -6.18553 |
| ACER3        | 0.251819 | 5.428903 | 1.231668 | 0.219538 | 0.337866 | -6.2994  |
| ELK3         | 0.314825 | 5.236669 | 1.230644 | 0.21992  | 0.338369 | -6.27518 |
| LOC440173    | 1.296422 | 0.454422 | 1.230189 | 0.22009  | 0.338578 | -5.33345 |
| MRPL46       | -0.18274 | 3.445706 | -1.23015 | 0.220105 | 0.338578 | -6.04699 |
| UGDH         | -0.3309  | 6.042194 | -1.22998 | 0.22017  | 0.338641 | -6.36883 |
| C19orf43     | 0.221088 | 6.452294 | 1.229865 | 0.220211 | 0.338667 | -6.36701 |
| SEMA6C       | -0.3541  | 2.91138  | -1.22933 | 0.220412 | 0.338859 | -5.9668  |
| TMEM5        | 0.205988 | 3.629569 | 1.229268 | 0.220435 | 0.338859 | -6.01284 |
| KIAA0391     | 0.198378 | 5.081883 | 1.229291 | 0.220426 | 0.338859 | -6.27069 |
| TMTC4        | -0.31691 | 4.643829 | -1.22921 | 0.220457 | 0.338859 | -6.27231 |
| RASAL2       | 0.278744 | 6.16346  | 1.229293 | 0.220425 | 0.338859 | -6.35523 |
| SCEL         | 2.247525 | 2.728609 | 1.229074 | 0.220507 | 0.338891 | -5.51012 |
| PPM1B        | -0.14334 | 5.726    | -1.229   | 0.220535 | 0.338891 | -6.35252 |
| MMP15        | -0.52671 | 6.037585 | -1.22896 | 0.220551 | 0.338891 | -6.37263 |
| MDP1         | -0.22358 | 2.217977 | -1.22862 | 0.220676 | 0.339046 | -5.79381 |
| TIMM17B      | 0.26729  | 4.899929 | 1.22852  | 0.220714 | 0.339068 | -6.24188 |
| OXA1L        | -0.18244 | 6.639413 | -1.22827 | 0.220807 | 0.339174 | -6.37452 |
| ATXN3        | -0.18538 | 4.640859 | -1.22811 | 0.220866 | 0.339226 | -6.26061 |
| LOC147727    | 0.28873  | 3.535126 | 1.227621 | 0.221051 | 0.339473 | -5.97641 |
| BAZ2A        | 0.150504 | 7.484439 | 1.226773 | 0.221369 | 0.339924 | -6.36795 |
| RING1        | 0.189057 | 4.738459 | 1.226516 | 0.221465 | 0.340034 | -6.23247 |
| P2RY1        | 1.058063 | 2.442626 | 1.225904 | 0.221695 | 0.34035  | -5.63962 |
| PIK3R4       | 0.221983 | 5.651102 | 1.225195 | 0.221962 | 0.340722 | -6.33002 |
| C20orf54     | 0.724209 | 3.97887  | 1.225079 | 0.222005 | 0.340751 | -5.98857 |
| BRD9         | 0.245786 | 5.176614 | 1.224878 | 0.222081 | 0.340829 | -6.28183 |
| PSMB6        | 0.224507 | 5.947833 | 1.224024 | 0.222402 | 0.341285 | -6.35258 |

|           |          |          |          |          |          |          |
|-----------|----------|----------|----------|----------|----------|----------|
| MAPK3     | -0.27876 | 6.391775 | -1.22394 | 0.222435 | 0.341298 | -6.38002 |
| TFEC      | 0.635597 | 1.618638 | 1.22378  | 0.222494 | 0.341313 | -5.56808 |
| SEPHS1    | 0.197417 | 5.411064 | 1.223839 | 0.222471 | 0.341313 | -6.31209 |
| EPHX1     | -0.47453 | 6.597436 | -1.2236  | 0.222563 | 0.341382 | -6.37762 |
| ZNF525    | -0.57098 | 2.566859 | -1.22336 | 0.222652 | 0.34148  | -5.93926 |
| C19orf20  | -0.25358 | 2.710066 | -1.22304 | 0.222771 | 0.341626 | -5.90716 |
| LOC151162 | -0.30953 | 6.30626  | -1.22282 | 0.222857 | 0.341721 | -6.3811  |
| SHISA2    | 1.12766  | 1.841579 | 1.222593 | 0.222941 | 0.341812 | -5.53144 |
| XRRA1     | -0.2869  | 4.140984 | -1.2219  | 0.223201 | 0.342136 | -6.21284 |
| TARS2     | 0.195325 | 4.629654 | 1.221912 | 0.223198 | 0.342136 | -6.22196 |
| PLD1      | 0.354758 | 5.643572 | 1.221702 | 0.223277 | 0.342215 | -6.32347 |
| PCDHB10   | 0.469759 | 1.858165 | 1.221103 | 0.223503 | 0.342486 | -5.63492 |
| SUMF2     | 0.294705 | 6.600038 | 1.221156 | 0.223483 | 0.342486 | -6.37945 |
| TMEM17    | 0.393376 | 1.41115  | 1.220862 | 0.223594 | 0.342588 | -5.57279 |
| RBM4      | 0.133509 | 6.17707  | 1.220743 | 0.223639 | 0.342619 | -6.37184 |
| DAP       | -0.30355 | 7.458296 | -1.2202  | 0.223845 | 0.342897 | -6.36752 |
| MAP1S     | 0.224807 | 6.06703  | 1.220106 | 0.22388  | 0.342913 | -6.36385 |
| MBOAT2    | 0.537574 | 5.346993 | 1.219945 | 0.223941 | 0.342969 | -6.27784 |
| TRMT12    | 0.331406 | 3.543674 | 1.219447 | 0.224129 | 0.34322  | -5.97978 |
| WDYHV1    | 0.259792 | 3.379871 | 1.219126 | 0.224251 | 0.343354 | -5.95677 |
| CBWD1     | -0.33598 | 4.426792 | -1.21909 | 0.224266 | 0.343354 | -6.26173 |
| LOC284232 | -0.3208  | 0.755416 | -1.21844 | 0.22451  | 0.34369  | -5.57288 |
| PCDHB7    | -0.47349 | 0.156051 | -1.21807 | 0.224653 | 0.34387  | -5.50236 |
| S100A7    | 4.273656 | 3.958872 | 1.217982 | 0.224684 | 0.343881 | -5.4311  |
| HOMER1    | 0.405364 | 3.699071 | 1.217416 | 0.224899 | 0.344135 | -6.00567 |
| SOX7      | 0.554293 | 4.743445 | 1.217415 | 0.224899 | 0.344135 | -6.19678 |
| CYP2J2    | 0.838979 | 2.023702 | 1.216759 | 0.225148 | 0.344478 | -5.60955 |
| CTR9      | -0.15714 | 5.855422 | -1.21665 | 0.22519  | 0.344505 | -6.37419 |
| BCR       | -0.23446 | 7.006308 | -1.21651 | 0.225242 | 0.344546 | -6.38301 |
| CBX5      | -0.29183 | 7.35575  | -1.21596 | 0.225451 | 0.344827 | -6.37538 |
| XKR6      | -0.55066 | 0.142194 | -1.21588 | 0.225482 | 0.344837 | -5.51284 |
| BASP1     | 0.751736 | 4.355277 | 1.215741 | 0.225535 | 0.344843 | -6.08073 |
| SLC39A13  | -0.21412 | 5.164127 | -1.21575 | 0.22553  | 0.344843 | -6.333   |
| CDH17     | 2.708824 | 2.513502 | 1.215597 | 0.22559  | 0.344889 | -5.42875 |
| PCIF1     | 0.154537 | 6.112965 | 1.215316 | 0.225697 | 0.345015 | -6.37494 |
| MTHFS     | 0.290178 | 3.437321 | 1.21514  | 0.225764 | 0.34508  | -5.96647 |
| TRIP10    | 0.305622 | 5.715894 | 1.214818 | 0.225886 | 0.345229 | -6.34203 |
| ATP5C1    | -0.22691 | 7.318842 | -1.21418 | 0.22613  | 0.345563 | -6.37963 |
| CBR3      | 0.69464  | 2.658879 | 1.213214 | 0.226497 | 0.346087 | -5.74864 |
| WFIKK1    | -0.51454 | 0.424465 | -1.2127  | 0.226693 | 0.346349 | -5.55189 |
| FAM115C   | 0.52707  | 3.589065 | 1.212635 | 0.226719 | 0.346349 | -5.96261 |
| STRBP     | 0.271831 | 5.247499 | 1.211687 | 0.227081 | 0.346864 | -6.30295 |
| MED16     | -0.17644 | 6.181808 | -1.21102 | 0.227334 | 0.347213 | -6.39188 |
| PRMT7     | 0.209664 | 4.401617 | 1.210815 | 0.227414 | 0.347259 | -6.19692 |
| LOC339047 | -0.30036 | 5.069963 | -1.21077 | 0.22743  | 0.347259 | -6.33762 |
| PSMG2     | 0.200927 | 5.61155  | 1.210751 | 0.227438 | 0.347259 | -6.34576 |
| LRRC16B   | 0.803643 | 0.62177  | 1.210034 | 0.227713 | 0.34764  | -5.41825 |
| MYEOV     | 1.310056 | 3.199923 | 1.209964 | 0.22774  | 0.347643 | -5.74428 |
| SLC16A4   | -0.53285 | 1.60311  | -1.20982 | 0.227796 | 0.347692 | -5.75444 |
| PRKY      | 1.43024  | 1.315373 | 1.20916  | 0.228047 | 0.347999 | -5.439   |
| POMGNT1   | -0.18319 | 5.714071 | -1.20918 | 0.228039 | 0.347999 | -6.37758 |
| RMND1     | 0.194255 | 3.729286 | 1.208998 | 0.22811  | 0.348056 | -6.06088 |
| MAD2L1BP  | 0.309318 | 4.212206 | 1.208904 | 0.228145 | 0.348073 | -6.14312 |
| RBX1      | 0.215937 | 5.148548 | 1.208533 | 0.228288 | 0.348252 | -6.30164 |
| RNF216L   | 0.220635 | 3.752486 | 1.207676 | 0.228617 | 0.348715 | -6.06226 |
| FAM86D    | -0.39374 | 2.490056 | -1.20742 | 0.228714 | 0.348826 | -5.90476 |
| RYK       | 0.238356 | 5.769469 | 1.207069 | 0.22885  | 0.348995 | -6.36022 |
| LOC728875 | 0.577051 | 0.214834 | 1.206886 | 0.22892  | 0.349058 | -5.39217 |

|           |          |          |          |          |          |          |
|-----------|----------|----------|----------|----------|----------|----------|
| HSBP1L1   | -0.3002  | 2.393146 | -1.20676 | 0.228969 | 0.349058 | -5.86669 |
| UBAC1     | 0.229277 | 5.24786  | 1.206701 | 0.228991 | 0.349058 | -6.31356 |
| HDHD3     | -0.3828  | 5.124827 | -1.20681 | 0.228948 | 0.349058 | -6.35215 |
| ADNP      | 0.169921 | 7.30503  | 1.206305 | 0.229143 | 0.349252 | -6.39636 |
| SEC23A    | 0.241166 | 6.472928 | 1.205851 | 0.229318 | 0.34948  | -6.39607 |
| C14orf119 | 0.183994 | 5.505188 | 1.205742 | 0.22936  | 0.349506 | -6.34372 |
| ARID1A    | -0.17566 | 7.67219  | -1.20568 | 0.229385 | 0.349506 | -6.38248 |
| SLC1A4    | 0.449312 | 6.206335 | 1.205278 | 0.229539 | 0.349678 | -6.37816 |
| PRKCI     | 0.289558 | 6.814954 | 1.205253 | 0.229548 | 0.349678 | -6.40187 |
| PSMF1     | 0.179808 | 7.21009  | 1.205036 | 0.229632 | 0.349767 | -6.3996  |
| KIF5B     | -0.23938 | 8.226676 | -1.20477 | 0.229736 | 0.349888 | -6.36458 |
| PURB      | 0.20224  | 7.027773 | 1.204625 | 0.22979  | 0.349933 | -6.40264 |
| MICAL1    | -0.31792 | 4.824347 | -1.20432 | 0.229906 | 0.350071 | -6.32222 |
| HLA-DQA2  | 1.102723 | 1.733642 | 1.204104 | 0.229991 | 0.350162 | -5.5431  |
| ZBTB46    | -0.35131 | 2.537396 | -1.2038  | 0.230109 | 0.350281 | -5.9102  |
| CSF1      | -0.37676 | 4.886577 | -1.20371 | 0.230144 | 0.350281 | -6.33518 |
| GPX4      | 0.249787 | 6.866811 | 1.20373  | 0.230135 | 0.350281 | -6.40426 |
| IFT172    | -0.21772 | 4.27648  | -1.20354 | 0.230207 | 0.350338 | -6.24557 |
| MSI2      | 0.354854 | 3.979541 | 1.203088 | 0.230383 | 0.350567 | -6.09144 |
| CSDA      | 0.314425 | 7.969532 | 1.202556 | 0.230588 | 0.350842 | -6.38964 |
| ACY1      | 0.404163 | 4.791383 | 1.202434 | 0.230636 | 0.350876 | -6.24    |
| CDC42SE1  | 0.206824 | 6.853008 | 1.202292 | 0.23069  | 0.350921 | -6.40605 |
| RPS19BP1  | -0.18564 | 4.838635 | -1.20204 | 0.230788 | 0.351031 | -6.31443 |
| ABI2      | -0.25931 | 5.517396 | -1.20194 | 0.230826 | 0.351051 | -6.37929 |
| DNAJC1    | -0.26681 | 4.608856 | -1.20161 | 0.230956 | 0.35121  | -6.29652 |
| MMP17     | 0.809066 | 1.103345 | 1.201127 | 0.231141 | 0.351377 | -5.49387 |
| TTC30B    | 0.291299 | 3.041158 | 1.201193 | 0.231115 | 0.351377 | -5.8991  |
| SLC9A8    | -0.24662 | 5.72194  | -1.20115 | 0.231134 | 0.351377 | -6.39034 |
| UGGT2     | -0.25884 | 4.173032 | -1.20091 | 0.231225 | 0.351465 | -6.2388  |
| ANKMY1    | -0.23288 | 3.18822  | -1.19992 | 0.231609 | 0.352012 | -6.03462 |
| C9orf23   | 0.285116 | 3.554556 | 1.199832 | 0.231642 | 0.352024 | -6.01315 |
| TMEM132A  | 0.461711 | 6.213991 | 1.199657 | 0.23171  | 0.352088 | -6.38456 |
| DDX60L    | 0.406206 | 5.238179 | 1.199372 | 0.231821 | 0.352218 | -6.30178 |
| SDHB      | -0.17121 | 5.916675 | -1.19869 | 0.232086 | 0.352583 | -6.39871 |
| S100A4    | 0.476088 | 4.565831 | 1.197813 | 0.232426 | 0.353061 | -6.19899 |
| SRRM3     | 0.850351 | 2.392222 | 1.197651 | 0.232489 | 0.353088 | -5.69643 |
| ZNHIT3    | 0.154257 | 4.529974 | 1.197636 | 0.232495 | 0.353088 | -6.24185 |
| C17orf86  | 0.265866 | 2.110487 | 1.197118 | 0.232696 | 0.353356 | -5.73436 |
| CPA4      | 1.529111 | 0.460025 | 1.196951 | 0.232761 | 0.3534   | -5.37159 |
| ZMPSTE24  | 0.197192 | 6.312084 | 1.196914 | 0.232775 | 0.3534   | -6.40313 |
| DAB2IP    | -0.27098 | 7.005416 | -1.19666 | 0.232873 | 0.353509 | -6.40616 |
| TBC1D16   | -0.25766 | 4.48071  | -1.19622 | 0.233044 | 0.353731 | -6.28655 |
| PAX8      | 0.697503 | 2.491172 | 1.196098 | 0.233093 | 0.353752 | -5.73205 |
| TAF10     | 0.262014 | 5.564122 | 1.196058 | 0.233108 | 0.353752 | -6.35397 |
| KTI12     | 0.153008 | 3.129553 | 1.195726 | 0.233238 | 0.35391  | -5.95098 |
| C11orf10  | 0.219138 | 5.542687 | 1.195636 | 0.233273 | 0.353924 | -6.35608 |
| ZNF259    | 0.248872 | 4.852333 | 1.195406 | 0.233362 | 0.353983 | -6.27757 |
| IDH3A     | 0.215666 | 6.125461 | 1.195464 | 0.23334  | 0.353983 | -6.39674 |
| LY6G5C    | -0.36227 | 0.26883  | -1.19477 | 0.23361  | 0.35432  | -5.52911 |
| CORO1C    | 0.262846 | 7.267661 | 1.194615 | 0.233671 | 0.354374 | -6.41224 |
| ZSCAN20   | -0.23502 | 1.941117 | -1.19409 | 0.233875 | 0.354645 | -5.78552 |
| CNTNAP2   | 1.196607 | 2.660155 | 1.193799 | 0.233989 | 0.35478  | -5.6917  |
| FAT2      | 2.293569 | 5.009104 | 1.193252 | 0.234203 | 0.355065 | -5.94215 |
| C12orf57  | -0.25406 | 5.178955 | -1.19272 | 0.234411 | 0.355284 | -6.36492 |
| PGAM1     | 0.272106 | 7.781834 | 1.192688 | 0.234423 | 0.355284 | -6.4048  |
| VPS13B    | -0.21498 | 6.102581 | -1.19272 | 0.234409 | 0.355284 | -6.41268 |
| C22orf27  | 0.243712 | 2.048389 | 1.192412 | 0.234531 | 0.355408 | -5.73278 |
| DGCR2     | -0.19175 | 7.132128 | -1.19234 | 0.234558 | 0.35541  | -6.41021 |

|           |          |          |          |          |          |          |
|-----------|----------|----------|----------|----------|----------|----------|
| LAMA4     | -0.40997 | 6.126784 | -1.19211 | 0.23465  | 0.355512 | -6.41687 |
| CNFN      | 1.914358 | 3.857536 | 1.191885 | 0.234737 | 0.355528 | -5.78931 |
| HSPB11    | 0.232046 | 3.694805 | 1.191956 | 0.234709 | 0.355528 | -6.06673 |
| WDR26     | -0.19191 | 7.234448 | -1.19191 | 0.234728 | 0.355528 | -6.40867 |
| LARS      | -0.15358 | 6.82439  | -1.19174 | 0.234795 | 0.355578 | -6.41675 |
| SERPINB3  | 2.688011 | 3.015452 | 1.191403 | 0.234926 | 0.355656 | -5.53697 |
| SNX12     | 0.23513  | 3.111382 | 1.191457 | 0.234904 | 0.355656 | -5.93714 |
| DCBLD2    | -0.62052 | 4.912666 | -1.19134 | 0.234949 | 0.355656 | -6.37172 |
| GNA12     | 0.222217 | 6.609728 | 1.191524 | 0.234878 | 0.355656 | -6.41637 |
| EXOC4     | -0.17489 | 6.108675 | -1.19124 | 0.234988 | 0.355677 | -6.41366 |
| ITGAM     | 0.584345 | 2.470728 | 1.190615 | 0.235234 | 0.356011 | -5.75537 |
| GEMIN5    | 0.187479 | 5.075994 | 1.190343 | 0.235341 | 0.356134 | -6.31802 |
| PDCD1     | 0.651623 | 0.38353  | 1.190257 | 0.235375 | 0.356135 | -5.42519 |
| SLC27A4   | 0.318336 | 5.967055 | 1.190211 | 0.235393 | 0.356135 | -6.38897 |
| YKT6      | 0.187986 | 6.548651 | 1.189581 | 0.23564  | 0.35647  | -6.41816 |
| SASH3     | 0.548234 | 2.780898 | 1.189164 | 0.235803 | 0.356602 | -5.81897 |
| MTHFD2L   | -0.24249 | 3.361223 | -1.1892  | 0.235788 | 0.356602 | -6.08889 |
| TBCK      | -0.20922 | 4.506531 | -1.18924 | 0.235773 | 0.356602 | -6.29281 |
| C2orf81   | 0.434894 | 1.823989 | 1.189045 | 0.23585  | 0.356634 | -5.66999 |
| TMEM183A  | 0.164923 | 5.512659 | 1.188862 | 0.235922 | 0.356678 | -6.36604 |
| PRPF6     | 0.155154 | 6.792661 | 1.188841 | 0.23593  | 0.356678 | -6.42201 |
| SRFBP1    | 0.186839 | 3.642002 | 1.188208 | 0.236179 | 0.356992 | -6.06838 |
| MSL2      | 0.209426 | 5.60902  | 1.188182 | 0.236189 | 0.356992 | -6.37181 |
| NBPF15    | 0.326893 | 3.504762 | 1.187822 | 0.236331 | 0.357167 | -6.01156 |
| AZIN1     | 0.202276 | 7.578155 | 1.187685 | 0.236385 | 0.357201 | -6.41373 |
| SSU72     | 0.18444  | 6.643007 | 1.187635 | 0.236404 | 0.357201 | -6.42205 |
| ATAD2B    | 0.188192 | 4.744143 | 1.187532 | 0.236445 | 0.357224 | -6.27985 |
| TNFRSF11A | 0.827868 | 2.755636 | 1.187028 | 0.236643 | 0.357485 | -5.76805 |
| IL1RN     | 0.901256 | 6.465405 | 1.186572 | 0.236822 | 0.357717 | -6.39071 |
| NRIP3     | -0.5256  | 1.523299 | -1.1865  | 0.23685  | 0.357721 | -5.76634 |
| HNRPLL    | -0.12409 | 5.21584  | -1.18619 | 0.236975 | 0.35787  | -6.36564 |
| PFKFB2    | -0.40596 | 5.436096 | -1.18579 | 0.237129 | 0.358047 | -6.40057 |
| LHFPL2    | -0.28514 | 5.580642 | -1.18576 | 0.237143 | 0.358047 | -6.40304 |
| CP        | -0.92897 | 1.849521 | -1.18534 | 0.237307 | 0.358217 | -5.89811 |
| PNKP      | 0.185203 | 4.6962   | 1.185355 | 0.237302 | 0.358217 | -6.27577 |
| VCP       | 0.195632 | 8.535222 | 1.185101 | 0.237402 | 0.358322 | -6.39053 |
| LOC285359 | -0.22835 | 0.477606 | -1.18467 | 0.237572 | 0.35854  | -5.5551  |
| SPAG4     | 0.545214 | 1.058657 | 1.184361 | 0.237694 | 0.358685 | -5.5366  |
| TP63      | 2.809293 | 5.215019 | 1.183669 | 0.237968 | 0.359043 | -5.89539 |
| ZNF558    | -0.34623 | 4.045354 | -1.18363 | 0.237983 | 0.359043 | -6.25281 |
| C18orf18  | -0.42583 | 0.518517 | -1.18338 | 0.23808  | 0.359151 | -5.58992 |
| HSD17B8   | -0.28875 | 2.979425 | -1.18304 | 0.238215 | 0.359277 | -6.01996 |
| SMG1      | 0.180848 | 7.779001 | 1.183084 | 0.238198 | 0.359277 | -6.41436 |
| FGF12     | -0.61856 | 0.560993 | -1.18277 | 0.238322 | 0.359397 | -5.626   |
| LZTFL1    | -0.21269 | 4.214402 | -1.18271 | 0.238346 | 0.359397 | -6.26106 |
| FUT3      | 1.28909  | 4.002666 | 1.182392 | 0.238472 | 0.359548 | -5.92835 |
| GPR114    | 0.78746  | 1.833605 | 1.182169 | 0.238561 | 0.359612 | -5.62565 |
| MMS19     | 0.17878  | 5.948996 | 1.182155 | 0.238566 | 0.359612 | -6.40497 |
| HSBP1     | 0.186453 | 6.702067 | 1.181925 | 0.238657 | 0.35971  | -6.42938 |
| CD74      | 0.475631 | 9.914034 | 1.18165  | 0.238766 | 0.359836 | -6.35515 |
| TLK1      | -0.15939 | 6.08391  | -1.18145 | 0.238846 | 0.359917 | -6.42418 |
| ABLIM2    | 0.602136 | 3.104812 | 1.181146 | 0.238966 | 0.359981 | -5.87955 |
| FRG1      | -0.17735 | 4.380401 | -1.18126 | 0.238922 | 0.359981 | -6.28253 |
| SPOPL     | -0.23776 | 5.258342 | -1.18118 | 0.238953 | 0.359981 | -6.38371 |
| ZNF574    | 0.17767  | 5.475042 | 1.18086  | 0.239079 | 0.360113 | -6.37115 |
| POLR2I    | 0.245372 | 4.440143 | 1.18034  | 0.239285 | 0.360346 | -6.23429 |
| RBM22     | 0.136617 | 5.681993 | 1.180382 | 0.239268 | 0.360346 | -6.39186 |
| RMND5A    | 0.19251  | 6.736093 | 1.180266 | 0.239314 | 0.360351 | -6.4316  |

|           |          |          |          |          |          |          |
|-----------|----------|----------|----------|----------|----------|----------|
| KDM4D     | 0.364991 | 0.02839  | 1.179963 | 0.239435 | 0.360487 | -5.42327 |
| UBTD2     | 0.175794 | 4.968085 | 1.17991  | 0.239456 | 0.360487 | -6.3186  |
| CHRD12    | -0.8833  | 1.29668  | -1.17929 | 0.239701 | 0.360816 | -5.79658 |
| POLRMT    | 0.197055 | 5.60257  | 1.17908  | 0.239785 | 0.360866 | -6.38279 |
| ATP10D    | -0.39346 | 5.226228 | -1.17911 | 0.239774 | 0.360866 | -6.39459 |
| PLA2G2A   | -1.18683 | 2.559937 | -1.17838 | 0.240064 | 0.361246 | -6.10845 |
| MLST8     | 0.204971 | 5.047879 | 1.177811 | 0.24029  | 0.361547 | -6.32728 |
| UBAP2     | 0.202206 | 6.461873 | 1.177696 | 0.240335 | 0.361577 | -6.42993 |
| RNF125    | -0.4609  | 2.92656  | -1.17737 | 0.240466 | 0.361734 | -6.04677 |
| TMEM14A   | 0.327451 | 4.463625 | 1.177206 | 0.24053  | 0.361793 | -6.22948 |
| C16orf13  | 0.265309 | 5.078777 | 1.176951 | 0.240632 | 0.361867 | -6.32549 |
| NUP50     | 0.160306 | 6.516217 | 1.176984 | 0.240619 | 0.361867 | -6.43281 |
| DPH5      | -0.18835 | 3.800994 | -1.17673 | 0.24072  | 0.361959 | -6.19    |
| MED8      | 0.181042 | 4.938323 | 1.176668 | 0.240745 | 0.361959 | -6.31806 |
| SPAG1     | 0.386637 | 4.412027 | 1.176258 | 0.240908 | 0.362088 | -6.20904 |
| COMMD3    | 0.181219 | 4.47759  | 1.176339 | 0.240876 | 0.362088 | -6.25458 |
| CHD1      | -0.20314 | 5.759367 | -1.17632 | 0.240884 | 0.362088 | -6.4196  |
| SPIN4     | 0.533898 | 4.124901 | 1.176031 | 0.240999 | 0.362185 | -6.12144 |
| FHAD1     | 0.670834 | 0.331226 | 1.175881 | 0.241059 | 0.362197 | -5.42847 |
| CHD6      | -0.22868 | 6.3772   | -1.17594 | 0.241035 | 0.362197 | -6.43689 |
| ENTPD7    | 0.285279 | 5.413073 | 1.17573  | 0.241119 | 0.362248 | -6.36108 |
| COL4A2    | 0.389298 | 8.865    | 1.175429 | 0.241239 | 0.362351 | -6.39642 |
| DNAJA1    | 0.22098  | 6.679534 | 1.175462 | 0.241225 | 0.362351 | -6.43634 |
| RBP1      | 0.955784 | 4.288846 | 1.17527  | 0.241302 | 0.362407 | -6.0753  |
| TMEM11    | 0.184683 | 4.380461 | 1.174702 | 0.241529 | 0.362708 | -6.23948 |
| TMEM9     | 0.219286 | 5.45902  | 1.174635 | 0.241556 | 0.36271  | -6.37311 |
| RPL39     | 0.335108 | 5.171133 | 1.174334 | 0.241676 | 0.362851 | -6.33219 |
| RSL1D1    | 0.186594 | 7.233428 | 1.174145 | 0.241751 | 0.362926 | -6.43576 |
| USH1G     | 1.35361  | -0.00089 | 1.173897 | 0.24185  | 0.362996 | -5.3946  |
| MTMR2     | -0.17329 | 5.831844 | -1.17394 | 0.241834 | 0.362996 | -6.4244  |
| ZXDB      | -0.25001 | 4.687134 | -1.17369 | 0.241931 | 0.363079 | -6.33732 |
| C14orf128 | 0.376202 | 1.595719 | 1.173404 | 0.242047 | 0.363214 | -5.6603  |
| STAT6     | -0.18513 | 7.784646 | -1.17286 | 0.242264 | 0.3635   | -6.41782 |
| BEST1     | -0.32992 | 0.629313 | -1.17265 | 0.242349 | 0.363588 | -5.60576 |
| MEI1      | -0.56972 | 0.188248 | -1.1723  | 0.242489 | 0.36376  | -5.56937 |
| RBM18     | -0.16135 | 4.977454 | -1.17215 | 0.242548 | 0.363769 | -6.36194 |
| SUB1      | 0.200445 | 6.926727 | 1.172163 | 0.242544 | 0.363769 | -6.4415  |
| TMEM121   | -0.41708 | 0.289096 | -1.17178 | 0.242698 | 0.363956 | -5.5678  |
| ALG14     | -0.2137  | 2.706783 | -1.1712  | 0.242931 | 0.364267 | -5.95604 |
| RPS6KL1   | 0.627208 | 1.505286 | 1.170676 | 0.24314  | 0.364293 | -5.61246 |
| PCDHGA6   | -0.40562 | 0.618951 | -1.17107 | 0.242981 | 0.364293 | -5.61774 |
| GLYCTK    | -0.49931 | 2.34885  | -1.17099 | 0.243016 | 0.364293 | -5.93107 |
| LMBR1L    | -0.18686 | 3.964723 | -1.17059 | 0.243175 | 0.364293 | -6.22888 |
| CCDC82    | -0.21837 | 4.513048 | -1.17072 | 0.243122 | 0.364293 | -6.31568 |
| C2CD3     | 0.230382 | 5.421637 | 1.170826 | 0.24308  | 0.364293 | -6.37312 |
| ARF4      | -0.20414 | 7.4962   | -1.17064 | 0.243156 | 0.364293 | -6.42751 |
| GBAS      | -0.23012 | 6.191183 | -1.17094 | 0.243035 | 0.364293 | -6.44031 |
| USP5      | 0.213973 | 6.622141 | 1.170567 | 0.243184 | 0.364293 | -6.44127 |
| CLEC11A   | 0.470694 | 2.849701 | 1.170447 | 0.243232 | 0.364326 | -5.86719 |
| C2orf64   | -0.18044 | 3.700247 | -1.1701  | 0.243371 | 0.364456 | -6.17368 |
| NUDT9     | -0.18503 | 4.134536 | -1.17015 | 0.243352 | 0.364456 | -6.25924 |
| TRMU      | 0.172408 | 3.531427 | 1.168447 | 0.244035 | 0.365412 | -6.06884 |
| CCDC88C   | 0.28296  | 6.223232 | 1.168372 | 0.244066 | 0.365419 | -6.43004 |
| UBE2Q2    | -0.27315 | 5.814811 | -1.16784 | 0.24428  | 0.3657   | -6.43448 |
| LOC595101 | 0.373059 | 2.925826 | 1.167584 | 0.244383 | 0.365815 | -5.90052 |
| U2AF1L4   | -0.23408 | 2.332378 | -1.16724 | 0.24452  | 0.365981 | -5.89032 |
| ZNF121    | 0.258083 | 3.657634 | 1.166499 | 0.24482  | 0.366391 | -6.08329 |
| BBS12     | -0.24788 | 1.901069 | -1.16613 | 0.244968 | 0.366456 | -5.81301 |

|          |          |          |          |          |          |          |
|----------|----------|----------|----------|----------|----------|----------|
| C8orf40  | -0.28955 | 4.252354 | -1.16618 | 0.244948 | 0.366456 | -6.29497 |
| RIN3     | 0.351936 | 4.939732 | 1.166319 | 0.244893 | 0.366456 | -6.31118 |
| AGBL5    | -0.23104 | 4.717618 | -1.16626 | 0.244917 | 0.366456 | -6.34761 |
| ZNF16    | -0.2015  | 3.319633 | -1.16552 | 0.245215 | 0.366746 | -6.1004  |
| AIP      | 0.223033 | 4.920035 | 1.165539 | 0.245207 | 0.366746 | -6.32438 |
| ERP29    | -0.20736 | 6.496434 | -1.16525 | 0.245323 | 0.366868 | -6.44966 |
| NIPA1    | -0.24433 | 5.410643 | -1.16516 | 0.245359 | 0.366883 | -6.41425 |
| DDC      | 1.761957 | 0.659057 | 1.163727 | 0.245939 | 0.367711 | -5.40975 |
| EXD3     | -0.25154 | 3.172988 | -1.16317 | 0.246165 | 0.367852 | -6.07583 |
| PTDSS2   | -0.22644 | 4.244705 | -1.1633  | 0.246112 | 0.367852 | -6.28927 |
| NAB2     | 0.30809  | 4.766572 | 1.163322 | 0.246103 | 0.367852 | -6.29773 |
| SOX13    | 0.343766 | 5.482141 | 1.163229 | 0.246141 | 0.367852 | -6.37788 |
| C17orf63 | 0.218398 | 6.106367 | 1.163173 | 0.246163 | 0.367852 | -6.43344 |
| NINJ2    | 0.429507 | 1.689369 | 1.162588 | 0.2464   | 0.368164 | -5.67818 |
| BHLHE40  | 0.333798 | 7.738884 | 1.161971 | 0.24665  | 0.368498 | -6.44277 |
| LITAF    | 0.225843 | 7.150574 | 1.161797 | 0.246721 | 0.368564 | -6.45175 |
| LRRC25   | 0.485651 | 1.817815 | 1.161452 | 0.246861 | 0.368734 | -5.6932  |
| DDAH2    | 0.354853 | 4.863085 | 1.161107 | 0.247    | 0.368894 | -6.30656 |
| CHMP2A   | -0.23146 | 5.908627 | -1.16106 | 0.247021 | 0.368894 | -6.44431 |
| MTRR     | 0.203142 | 5.115439 | 1.160798 | 0.247126 | 0.369012 | -6.35517 |
| PTPLAD2  | -0.43879 | 3.112239 | -1.16059 | 0.247208 | 0.369091 | -6.10998 |
| CEBPZ    | 0.164887 | 6.027112 | 1.160536 | 0.247232 | 0.369091 | -6.43494 |
| EMP2     | 0.351649 | 7.228773 | 1.160067 | 0.247422 | 0.369336 | -6.45412 |
| FASTKD5  | 0.199537 | 4.544438 | 1.15962  | 0.247604 | 0.369568 | -6.28249 |
| ZNF324B  | -0.24486 | 2.790595 | -1.15936 | 0.247709 | 0.369634 | -5.99672 |
| TTC9     | -0.56983 | 4.280198 | -1.15935 | 0.247713 | 0.369634 | -6.3392  |
| C17orf37 | 0.491617 | 5.640423 | 1.159315 | 0.247728 | 0.369634 | -6.3843  |
| CDR2     | -0.28401 | 4.53476  | -1.15895 | 0.247877 | 0.369818 | -6.33974 |
| RDH11    | 0.179274 | 6.279135 | 1.158674 | 0.247989 | 0.369945 | -6.44722 |
| BOLA3    | 0.265152 | 3.489913 | 1.15789  | 0.248308 | 0.370381 | -6.05124 |
| GALE     | -0.41768 | 5.156959 | -1.15752 | 0.248457 | 0.370564 | -6.41502 |
| PLBD2    | 0.211358 | 6.057501 | 1.157236 | 0.248574 | 0.370699 | -6.43808 |
| ZNF398   | -0.19491 | 4.898836 | -1.15594 | 0.249104 | 0.371449 | -6.37571 |
| TMPPE    | -0.28183 | 2.579291 | -1.1557  | 0.2492   | 0.371488 | -5.96065 |
| TOP3B    | 0.154752 | 4.360608 | 1.155717 | 0.249194 | 0.371488 | -6.26225 |
| PUM2     | -0.13807 | 7.623064 | -1.15568 | 0.24921  | 0.371488 | -6.44312 |
| CCDC76   | -0.18589 | 3.939707 | -1.15546 | 0.249298 | 0.371581 | -6.24045 |
| BATF     | 0.626313 | 1.793429 | 1.154802 | 0.249567 | 0.371942 | -5.67513 |
| VASH2    | -0.50167 | 1.4835   | -1.15471 | 0.249603 | 0.371956 | -5.79465 |
| PPP1R1C  | 0.638698 | -0.01315 | 1.15443  | 0.249719 | 0.372089 | -5.41823 |
| PLA2G16  | -0.67526 | 3.769563 | -1.15435 | 0.249752 | 0.372098 | -6.28521 |
| ACTR10   | -0.16384 | 5.079986 | -1.15395 | 0.249917 | 0.372264 | -6.39373 |
| RFFL     | 0.242958 | 5.723016 | 1.153996 | 0.249897 | 0.372264 | -6.41818 |
| PLEKHM1  | -0.27569 | 6.19756  | -1.15349 | 0.250103 | 0.372501 | -6.46121 |
| C7orf31  | -0.35216 | 2.659814 | -1.15277 | 0.250401 | 0.372905 | -5.9942  |
| CTSK     | 0.502955 | 5.471616 | 1.152548 | 0.25049  | 0.372998 | -6.37405 |
| MAK16    | 0.257918 | 4.713818 | 1.152321 | 0.250582 | 0.373057 | -6.30776 |
| NAV2     | -0.36053 | 6.08741  | -1.15236 | 0.250565 | 0.373057 | -6.46187 |
| CCRN4L   | 0.333932 | 3.215803 | 1.152043 | 0.250697 | 0.373187 | -5.98513 |
| C19orf23 | 0.327119 | 0.453321 | 1.15187  | 0.250767 | 0.373252 | -5.51549 |
| LARP4    | -0.18401 | 6.243781 | -1.15174 | 0.250822 | 0.373294 | -6.46265 |
| FLOT2    | 0.210738 | 6.837349 | 1.151081 | 0.251091 | 0.373655 | -6.46578 |
| SLC34A2  | 1.690353 | 1.37779  | 1.150794 | 0.251209 | 0.373729 | -5.47646 |
| JAK3     | 0.460722 | 3.982479 | 1.150764 | 0.251221 | 0.373729 | -6.13402 |
| CDYL     | 0.198713 | 5.134638 | 1.150876 | 0.251175 | 0.373729 | -6.36931 |
| FDXACB1  | 0.246124 | 1.566134 | 1.150616 | 0.251282 | 0.37374  | -5.6985  |
| TSKU     | 0.364561 | 6.543952 | 1.150649 | 0.251268 | 0.37374  | -6.45939 |
| C5orf35  | -0.32364 | 1.935242 | -1.14998 | 0.251544 | 0.37409  | -5.84777 |

|            |          |          |          |          |          |          |
|------------|----------|----------|----------|----------|----------|----------|
| LMO2       | -0.33621 | 2.834919 | -1.14944 | 0.251766 | 0.374335 | -6.03633 |
| C17orf89   | 0.289527 | 3.426421 | 1.149418 | 0.251774 | 0.374335 | -6.043   |
| USP48      | -0.15676 | 5.86879  | -1.14938 | 0.251789 | 0.374335 | -6.45365 |
| OPN3       | 0.366328 | 4.337085 | 1.14903  | 0.251934 | 0.37451  | -6.22975 |
| C7orf26    | 0.152798 | 5.064981 | 1.148029 | 0.252346 | 0.375083 | -6.36903 |
| EIF1AD     | 0.131159 | 4.825869 | 1.147864 | 0.252414 | 0.375143 | -6.34298 |
| CDC42EP3   | -0.38725 | 4.750938 | -1.14779 | 0.252445 | 0.37515  | -6.38778 |
| H2AFV      | -0.17933 | 7.457944 | -1.14682 | 0.252845 | 0.375704 | -6.45631 |
| NCRNA00120 | 0.291208 | 0.486338 | 1.146671 | 0.252905 | 0.375742 | -5.53064 |
| MED26      | 0.151097 | 4.178074 | 1.146567 | 0.252948 | 0.375742 | -6.23952 |
| GSR        | -0.38276 | 5.755105 | -1.14656 | 0.252951 | 0.375742 | -6.46007 |
| C9orf82    | -0.26978 | 4.216606 | -1.14639 | 0.25302  | 0.375805 | -6.3102  |
| HSPA12A    | -0.43546 | 2.958774 | -1.14624 | 0.253083 | 0.375859 | -6.09138 |
| ZNF721     | -0.23479 | 4.559803 | -1.14602 | 0.253174 | 0.375953 | -6.35224 |
| SMARCE1    | 0.26965  | 6.613001 | 1.145849 | 0.253244 | 0.376018 | -6.46858 |
| C5orf23    | -0.77168 | 1.620785 | -1.14533 | 0.253457 | 0.376257 | -5.87186 |
| GLCE       | 0.239143 | 5.321815 | 1.14533  | 0.253459 | 0.376257 | -6.39126 |
| PHB2       | 0.207325 | 6.991439 | 1.144773 | 0.253689 | 0.376558 | -6.47264 |
| FAM195A    | -0.2922  | 4.040868 | -1.14429 | 0.253889 | 0.376816 | -6.28659 |
| C8orf33    | 0.196636 | 5.719512 | 1.143123 | 0.254372 | 0.377491 | -6.43361 |
| HLA-DMA    | 0.53871  | 4.755129 | 1.143034 | 0.254409 | 0.377506 | -6.28433 |
| ISYNA1     | 0.502682 | 4.512313 | 1.142437 | 0.254656 | 0.377815 | -6.24942 |
| GPS1       | 0.168346 | 6.284027 | 1.142402 | 0.254671 | 0.377815 | -6.46627 |
| OVGP1      | -0.40619 | 0.83473  | -1.14212 | 0.254787 | 0.377907 | -5.68284 |
| C1orf38    | 0.433181 | 3.830388 | 1.142173 | 0.254765 | 0.377907 | -6.11292 |
| LRMP       | -0.59242 | 0.967832 | -1.142   | 0.254836 | 0.377939 | -5.73561 |
| NEK4       | -0.19931 | 4.66992  | -1.14124 | 0.255153 | 0.378369 | -6.36701 |
| MAP2K7     | -0.15278 | 5.324009 | -1.14103 | 0.255242 | 0.378461 | -6.42925 |
| MYL6B      | 0.335098 | 3.480912 | 1.140952 | 0.255272 | 0.378466 | -6.05775 |
| MYO1D      | 0.280479 | 7.49158  | 1.140775 | 0.255345 | 0.378534 | -6.47097 |
| DSG1       | 2.044718 | 1.775839 | 1.14056  | 0.255435 | 0.378627 | -5.49945 |
| IRF2BP2    | 0.151511 | 8.143792 | 1.140345 | 0.255524 | 0.378719 | -6.45335 |
| RHCG       | 2.872876 | 4.505547 | 1.139928 | 0.255697 | 0.378936 | -5.81004 |
| FAM108B1   | 0.193184 | 4.554645 | 1.139625 | 0.255823 | 0.379082 | -6.30755 |
| RPS17      | 0.243062 | 8.870798 | 1.13933  | 0.255946 | 0.379223 | -6.43304 |
| SEMA6B     | -0.34255 | 3.561736 | -1.13918 | 0.25601  | 0.379278 | -6.21207 |
| TPRA1      | 0.178674 | 4.846413 | 1.138722 | 0.256199 | 0.379518 | -6.35026 |
| MORC3      | -0.1942  | 5.566621 | -1.13789 | 0.256545 | 0.37999  | -6.45302 |
| ZNF720     | -0.20654 | 3.913736 | -1.1378  | 0.256584 | 0.380007 | -6.25924 |
| CCDC71     | -0.17431 | 3.607953 | -1.13753 | 0.256697 | 0.380134 | -6.18997 |
| C22orf36   | -0.30831 | 2.903976 | -1.13726 | 0.256807 | 0.38024  | -6.0574  |
| SAV1       | -0.22693 | 5.31957  | -1.13722 | 0.256823 | 0.38024  | -6.43848 |
| GMEB1      | 0.176153 | 3.343459 | 1.136867 | 0.256972 | 0.380421 | -6.06122 |
| STK11IP    | 0.162439 | 4.419548 | 1.136708 | 0.257038 | 0.380459 | -6.29292 |
| SNTB2      | -0.21789 | 6.042723 | -1.13664 | 0.257065 | 0.380459 | -6.47598 |
| BCAR1      | -0.23002 | 6.802362 | -1.13661 | 0.25708  | 0.380459 | -6.47973 |
| LOC146880  | 0.300517 | 4.563891 | 1.136393 | 0.25717  | 0.380552 | -6.29673 |
| GGNBP2     | -0.11458 | 5.971461 | -1.13614 | 0.257275 | 0.380667 | -6.47134 |
| MAPKBP1    | -0.32382 | 5.783576 | -1.13576 | 0.257435 | 0.380864 | -6.47158 |
| TRAPPC3    | 0.151678 | 5.133785 | 1.135453 | 0.257562 | 0.381012 | -6.39117 |
| GLG1       | -0.15921 | 8.024135 | -1.13534 | 0.257609 | 0.381041 | -6.45423 |
| FADS3      | 0.396765 | 3.722017 | 1.135192 | 0.257671 | 0.381093 | -6.10657 |
| STRN3      | -0.21771 | 5.248616 | -1.13489 | 0.257796 | 0.381237 | -6.43491 |
| TFCP2L1    | -0.57308 | 5.585258 | -1.13479 | 0.257838 | 0.381258 | -6.47283 |
| ARCN1      | -0.1773  | 7.78982  | -1.13469 | 0.25788  | 0.38128  | -6.46153 |
| MRPS27     | -0.16079 | 5.630138 | -1.1342  | 0.258085 | 0.381543 | -6.45917 |
| TASP1      | 0.17981  | 3.45153  | 1.133516 | 0.258372 | 0.381927 | -6.08851 |
| CABLES1    | -0.49491 | 4.105727 | -1.13324 | 0.258489 | 0.38202  | -6.33485 |

|           |          |          |          |          |          |          |
|-----------|----------|----------|----------|----------|----------|----------|
| CYP2S1    | 0.627018 | 6.757855 | 1.133284 | 0.258469 | 0.38202  | -6.47793 |
| KLC4      | -0.37128 | 4.32478  | -1.13235 | 0.258863 | 0.382531 | -6.35252 |
| PWP2      | 0.204132 | 4.894483 | 1.132084 | 0.258972 | 0.382644 | -6.36141 |
| UCP2      | 0.4471   | 5.829411 | 1.132032 | 0.258994 | 0.382644 | -6.43631 |
| HLA-DOB   | 0.560459 | 0.855392 | 1.131946 | 0.25903  | 0.382657 | -5.566   |
| COMP      | 1.284628 | 0.362204 | 1.131789 | 0.259096 | 0.382714 | -5.44253 |
| HSD17B7P2 | -0.45999 | 0.044384 | -1.13094 | 0.259451 | 0.383197 | -5.58063 |
| LACTB     | 0.204089 | 3.773474 | 1.130838 | 0.259495 | 0.383222 | -6.15799 |
| TJP3      | -1.00527 | 3.835918 | -1.13015 | 0.259786 | 0.383611 | -6.3572  |
| PTPRF     | 0.266747 | 9.393022 | 1.129859 | 0.259907 | 0.383732 | -6.42601 |
| DDX60     | 0.43635  | 5.905548 | 1.129821 | 0.259923 | 0.383732 | -6.44534 |
| LRG1      | -0.71133 | 3.607424 | -1.12947 | 0.260069 | 0.383908 | -6.28979 |
| METTL3    | 0.168188 | 4.501941 | 1.129044 | 0.260249 | 0.384133 | -6.31469 |
| ZNF766    | -0.17426 | 4.064139 | -1.12886 | 0.260326 | 0.384178 | -6.29248 |
| CCDC6     | -0.21148 | 7.1395   | -1.12884 | 0.260335 | 0.384178 | -6.48281 |
| CD3D      | 0.593436 | 1.335673 | 1.127608 | 0.260854 | 0.384904 | -5.63777 |
| LOC338758 | -0.31109 | 0.527588 | -1.12741 | 0.260938 | 0.384947 | -5.6389  |
| NF1       | 0.224108 | 7.131257 | 1.127452 | 0.26092  | 0.384947 | -6.49097 |
| LY6G6C    | 1.307876 | 0.621698 | 1.126993 | 0.261113 | 0.385107 | -5.45169 |
| LMTK3     | 0.547379 | 3.159772 | 1.126954 | 0.26113  | 0.385107 | -5.96036 |
| CDC40     | -0.15225 | 5.12119  | -1.12697 | 0.261124 | 0.385107 | -6.427   |
| YIPF4     | -0.13291 | 5.448371 | -1.12683 | 0.261184 | 0.385146 | -6.45357 |
| SNAI2     | 0.803965 | 4.493979 | 1.126747 | 0.261217 | 0.385155 | -6.20437 |
| DPYD      | -0.47279 | 4.414603 | -1.12655 | 0.261299 | 0.385223 | -6.38252 |
| MRP63     | 0.208568 | 5.059197 | 1.126507 | 0.261318 | 0.385223 | -6.38675 |
| FLJ42393  | -0.3641  | 0.539103 | -1.12573 | 0.261646 | 0.385624 | -5.64766 |
| PIGT      | 0.227816 | 7.520624 | 1.125796 | 0.261619 | 0.385624 | -6.48635 |
| SCPEP1    | -0.3962  | 6.026102 | -1.12557 | 0.261716 | 0.385686 | -6.49157 |
| NOP14     | 0.193151 | 5.779418 | 1.125192 | 0.261874 | 0.385879 | -6.45834 |
| EYA4      | -0.76838 | 0.098696 | -1.12464 | 0.262109 | 0.386185 | -5.63705 |
| PDCD7     | -0.14077 | 4.471827 | -1.1243  | 0.262251 | 0.386354 | -6.35551 |
| SH3TC1    | -0.38683 | 4.748261 | -1.12421 | 0.262288 | 0.386367 | -6.41324 |
| DCAF4     | 0.235824 | 3.767889 | 1.123985 | 0.262384 | 0.38645  | -6.15914 |
| STK17B    | 0.265116 | 5.57196  | 1.123948 | 0.2624   | 0.38645  | -6.43722 |
| CLDN15    | 0.618912 | 3.221774 | 1.123453 | 0.262609 | 0.386718 | -5.96156 |
| CDK5RAP3  | -0.19623 | 5.974141 | -1.12322 | 0.262707 | 0.38682  | -6.48835 |
| MFRP      | 0.408375 | 3.608682 | 1.12311  | 0.262755 | 0.38685  | -6.09037 |
| MPI       | -0.19632 | 4.638169 | -1.12301 | 0.262796 | 0.38687  | -6.38305 |
| LGALS7B   | 2.173613 | 2.04663  | 1.12284  | 0.262869 | 0.386937 | -5.53826 |
| LOC730101 | -0.50998 | 3.029559 | -1.12278 | 0.262897 | 0.386937 | -6.14403 |
| CNNM3     | -0.25054 | 5.628938 | -1.1224  | 0.263056 | 0.387131 | -6.47651 |
| ARID3B    | -0.26365 | 3.751089 | -1.12232 | 0.263091 | 0.387142 | -6.25189 |
| 4-Sep     | -0.31638 | 1.831666 | -1.12198 | 0.263235 | 0.387312 | -5.86141 |
|           | 0.222228 | 4.257235 | 1.121525 | 0.263427 | 0.387554 | -6.2706  |
| ZNF498    | -0.32462 | 4.696224 | -1.12144 | 0.263465 | 0.387569 | -6.40522 |
| ZNRF3     | -0.18054 | 4.022177 | -1.12047 | 0.263873 | 0.388088 | -6.29566 |
| FAM83G    | 0.387976 | 5.433381 | 1.120495 | 0.263864 | 0.388088 | -6.41718 |
| HIP1      | 0.338444 | 5.529925 | 1.119881 | 0.264125 | 0.388417 | -6.43222 |
| KIAA1609  | 0.346683 | 4.650578 | 1.119607 | 0.264242 | 0.388548 | -6.32356 |
| LRRC15    | 0.907273 | 2.766301 | 1.119124 | 0.264447 | 0.388668 | -5.83683 |
| NUDT18    | -0.24849 | 2.412429 | -1.11909 | 0.264462 | 0.388668 | -5.95919 |
| SIGIRR    | -0.3684  | 4.373701 | -1.11929 | 0.264376 | 0.388668 | -6.37235 |
| C7orf50   | 0.232578 | 5.203886 | 1.119178 | 0.264424 | 0.388668 | -6.4087  |
| CYP51A1   | 0.314563 | 6.605546 | 1.11922  | 0.264406 | 0.388668 | -6.49748 |
| SRP54     | 0.160119 | 5.614345 | 1.119014 | 0.264494 | 0.388674 | -6.4548  |
| C11orf71  | -0.26629 | 2.429572 | -1.11882 | 0.264578 | 0.388757 | -5.96828 |
| FAM84A    | 0.739497 | 5.34033  | 1.118404 | 0.264753 | 0.388973 | -6.37283 |
| ERCC8     | -0.15542 | 2.860427 | -1.11826 | 0.264814 | 0.389019 | -6.03979 |



|          |          |          |          |          |          |          |
|----------|----------|----------|----------|----------|----------|----------|
| IPO5     | -0.18736 | 7.655388 | -1.1182  | 0.26484  | 0.389019 | -6.48343 |
| NUBP1    | -0.17417 | 4.092954 | -1.11785 | 0.264989 | 0.389155 | -6.30941 |
| OTUD4    | 0.179311 | 6.507657 | 1.117859 | 0.264985 | 0.389155 | -6.49962 |
| POLR2F   | 0.207113 | 4.678542 | 1.117786 | 0.265017 | 0.389156 | -6.34816 |
| ALG11    | 0.33189  | 0.054939 | 1.117173 | 0.265278 | 0.389439 | -5.49712 |
| WVOX     | -0.27394 | 2.982176 | -1.11701 | 0.265349 | 0.389439 | -6.09485 |
| MRPS24   | 0.212551 | 5.467339 | 1.117075 | 0.26532  | 0.389439 | -6.43996 |
| CPSF7    | 0.129356 | 6.665815 | 1.117027 | 0.265341 | 0.389439 | -6.50357 |
| MCCC2    | -0.19012 | 6.595484 | -1.11712 | 0.265302 | 0.389439 | -6.504   |
| TSPAN13  | 0.421598 | 6.256375 | 1.116788 | 0.265442 | 0.389535 | -6.48374 |
| NRF1     | 0.098476 | 3.822538 | 1.116432 | 0.265594 | 0.389717 | -6.20767 |
| KIAA1826 | -0.23012 | 3.768672 | -1.11625 | 0.265673 | 0.389758 | -6.25964 |
| SMAGP    | 0.416698 | 4.942208 | 1.116235 | 0.265678 | 0.389758 | -6.35964 |
| DDT      | -0.2218  | 4.858548 | -1.11604 | 0.26576  | 0.389837 | -6.41849 |
| TMEM87A  | 0.16467  | 6.057194 | 1.115924 | 0.265811 | 0.389871 | -6.48681 |
| PIPSL    | 0.161644 | 3.033903 | 1.115121 | 0.266154 | 0.39031  | -6.02059 |
| BRD4     | 0.164255 | 7.560045 | 1.115093 | 0.266166 | 0.39031  | -6.49633 |
| NHEDC2   | -0.33833 | 3.25718  | -1.11492 | 0.266238 | 0.390334 | -6.17191 |
| WDR3     | 0.219017 | 5.380443 | 1.114966 | 0.266221 | 0.390334 | -6.43351 |
| ZNF282   | 0.192756 | 5.460441 | 1.114753 | 0.266311 | 0.3904   | -6.44356 |
| MLXIPL   | 1.091318 | 1.676154 | 1.114415 | 0.266456 | 0.390571 | -5.63352 |
| HKDC1    | 1.891407 | 1.783735 | 1.114337 | 0.26649  | 0.390579 | -5.54163 |
| PQLC2    | 0.18047  | 3.908212 | 1.114144 | 0.266572 | 0.390659 | -6.21173 |
| PLEKHH2  | -0.42601 | 3.606109 | -1.11387 | 0.266689 | 0.390707 | -6.26428 |
| ANKRD17  | -0.16612 | 7.427422 | -1.11392 | 0.266668 | 0.390707 | -6.49416 |
| ACACA    | 0.230927 | 6.924929 | 1.113921 | 0.266667 | 0.390707 | -6.50759 |
| PLCB2    | 0.455481 | 2.730111 | 1.113283 | 0.266941 | 0.391035 | -5.91053 |
| C15orf48 | 0.792982 | 4.363111 | 1.112808 | 0.267144 | 0.391292 | -6.18605 |
| GREM1    | -0.76785 | 6.33816  | -1.11259 | 0.267237 | 0.391387 | -6.50573 |
| SENP5    | 0.210818 | 5.699586 | 1.11244  | 0.267302 | 0.391441 | -6.46536 |
| CD3E     | 0.575024 | 3.047244 | 1.112249 | 0.267384 | 0.391499 | -5.95112 |
| RNF138   | 0.214931 | 5.052982 | 1.112217 | 0.267397 | 0.391499 | -6.40136 |
| DTX3     | -0.4323  | 3.563412 | -1.1119  | 0.267535 | 0.39166  | -6.26227 |
| CCNC     | -0.17147 | 5.906399 | -1.11137 | 0.267761 | 0.39195  | -6.49834 |
| DLX3     | 1.184217 | 0.316805 | 1.110815 | 0.267999 | 0.392257 | -5.46443 |
| KLHL31   | 0.402539 | 0.560323 | 1.110606 | 0.268089 | 0.392347 | -5.56598 |
| SLC31A2  | -0.30203 | 3.490558 | -1.11027 | 0.268235 | 0.39252  | -6.21779 |
| TMED4    | -0.17082 | 5.548482 | -1.10969 | 0.268483 | 0.392842 | -6.48187 |
| C2orf47  | 0.159208 | 3.816834 | 1.10895  | 0.268801 | 0.393228 | -6.20099 |
| ERI2     | -0.19546 | 4.607493 | -1.10894 | 0.268804 | 0.393228 | -6.3945  |
| ZSWIM5   | -0.51845 | 3.008078 | -1.10814 | 0.26915  | 0.393694 | -6.15596 |
| VAC14    | 0.158106 | 6.403689 | 1.108061 | 0.269184 | 0.393702 | -6.50845 |
| PSMG4    | 0.282799 | 2.696103 | 1.107613 | 0.269377 | 0.393943 | -5.93673 |
| HEXDC    | -0.22009 | 3.69512  | -1.10711 | 0.269593 | 0.394177 | -6.24955 |
| ARHGEF4  | 0.970509 | 4.959992 | 1.10715  | 0.269576 | 0.394177 | -6.29626 |
| IDI2     | -0.24707 | 1.240841 | -1.10692 | 0.269677 | 0.394258 | -5.76469 |
| ALKBH3   | -0.32434 | 3.545972 | -1.10671 | 0.269768 | 0.39435  | -6.23908 |
| ZNF517   | -0.23661 | 3.269449 | -1.1065  | 0.269856 | 0.394437 | -6.16262 |
| MDH2     | 0.200069 | 7.764894 | 1.106436 | 0.269884 | 0.394438 | -6.50209 |
| PLEKHA5  | -0.21835 | 5.50219  | -1.10588 | 0.270123 | 0.394745 | -6.48588 |
| GNPAT    | -0.16023 | 5.849013 | -1.10572 | 0.270192 | 0.394804 | -6.50175 |
| FAM127B  | 0.349413 | 5.511198 | 1.105364 | 0.270347 | 0.39499  | -6.44585 |
| CD200    | -0.40419 | 2.400662 | -1.105   | 0.270506 | 0.39518  | -6.00563 |
| EXOC3L   | 0.281961 | 1.418837 | 1.10459  | 0.270682 | 0.39533  | -5.71887 |
| FAM177A1 | -0.19336 | 5.365637 | -1.10462 | 0.270669 | 0.39533  | -6.47606 |
| ATP5E    | 0.211242 | 6.651796 | 1.104564 | 0.270693 | 0.39533  | -6.51627 |
| RNF39    | 0.594269 | 2.980782 | 1.104144 | 0.270875 | 0.395513 | -5.94012 |
| KIF27    | -0.25427 | 2.240633 | -1.10417 | 0.270862 | 0.395513 | -5.94449 |

|              |          |          |          |          |          |          |
|--------------|----------|----------|----------|----------|----------|----------|
| FREM2        | -1.00988 | 1.96567  | -1.10389 | 0.270984 | 0.395606 | -6.0167  |
| MYL12A       | 0.252169 | 7.732862 | 1.103866 | 0.270995 | 0.395606 | -6.50664 |
| PITX1        | 0.577905 | 6.690469 | 1.103767 | 0.271038 | 0.395627 | -6.51024 |
| ATG4C        | -0.18583 | 2.851302 | -1.1034  | 0.271198 | 0.395819 | -6.05948 |
| RABL5        | 0.277888 | 4.090692 | 1.103331 | 0.271227 | 0.39582  | -6.24533 |
| FAM104A      | 0.133603 | 5.449628 | 1.103201 | 0.271283 | 0.395861 | -6.46001 |
| ERCC2        | 0.200412 | 4.190626 | 1.10265  | 0.271522 | 0.396126 | -6.28087 |
| SLC27A3      | -0.24209 | 4.218163 | -1.10271 | 0.271494 | 0.396126 | -6.35614 |
| LRRC47       | -0.14233 | 5.912086 | -1.10236 | 0.271646 | 0.396266 | -6.5075  |
| LOC100129550 | -0.30313 | 4.005284 | -1.1021  | 0.27176  | 0.396391 | -6.33225 |
| SESTD1       | -0.30948 | 5.330189 | -1.10161 | 0.271971 | 0.396657 | -6.48428 |
| ETV1         | 0.535538 | 3.324536 | 1.101505 | 0.272018 | 0.396685 | -6.02686 |
| CCDC22       | -0.16847 | 4.202224 | -1.10125 | 0.272129 | 0.396792 | -6.34478 |
| CASP4        | 0.304971 | 5.576467 | 1.101205 | 0.272148 | 0.396792 | -6.45976 |
| ZNF233       | -0.36713 | 0.115921 | -1.10094 | 0.272263 | 0.396826 | -5.61112 |
| TEAD2        | -0.34025 | 4.309468 | -1.10089 | 0.272285 | 0.396826 | -6.38329 |
| MAX          | 0.146702 | 5.380554 | 1.100928 | 0.272268 | 0.396826 | -6.45542 |
| 7-Mar        | 0.17454  | 6.760656 | 1.100943 | 0.272262 | 0.396826 | -6.52167 |
| UQCRHL       | 0.244359 | 4.074008 | 1.100776 | 0.272334 | 0.396856 | -6.25086 |
| ITM2B        | -0.24405 | 9.455108 | -1.09946 | 0.272908 | 0.397651 | -6.44189 |
| CLTCL1       | -0.46124 | 2.379862 | -1.09908 | 0.273072 | 0.397848 | -6.01952 |
| USP49        | 0.317307 | 1.150539 | 1.098784 | 0.273201 | 0.397952 | -5.67789 |
| CSF3R        | 0.586883 | 2.148233 | 1.098805 | 0.273191 | 0.397952 | -5.80275 |
| IRF4         | -0.57862 | 1.693588 | -1.09823 | 0.273442 | 0.398262 | -5.9028  |
| HEATR7A      | -0.21465 | 6.077184 | -1.09814 | 0.27348  | 0.398276 | -6.51944 |
| TSPAN17      | 0.199804 | 5.117064 | 1.097957 | 0.273561 | 0.398352 | -6.42577 |
| PCMTD2       | 0.19789  | 5.579287 | 1.09736  | 0.273821 | 0.398648 | -6.47291 |
| PHGDH        | -0.53917 | 5.568543 | -1.09737 | 0.273818 | 0.398648 | -6.51305 |
| NRIP1        | 0.296317 | 6.461502 | 1.097216 | 0.273883 | 0.398698 | -6.51846 |
| CPLX1        | -0.49473 | 1.892726 | -1.09678 | 0.274076 | 0.398811 | -5.92566 |
| C6orf211     | 0.182176 | 4.567986 | 1.096866 | 0.274036 | 0.398811 | -6.35778 |
| GET4         | 0.210347 | 5.559134 | 1.096839 | 0.274048 | 0.398811 | -6.47057 |
| ZNF335       | 0.121103 | 5.570022 | 1.096881 | 0.27403  | 0.398811 | -6.47843 |
| BST1         | 0.465563 | 0.553494 | 1.096464 | 0.274211 | 0.39893  | -5.57207 |
| JKAMP        | 0.152828 | 5.355708 | 1.096458 | 0.274214 | 0.39893  | -6.45686 |
| HAAO         | -0.53261 | 1.605189 | -1.09577 | 0.274515 | 0.399293 | -5.88173 |
| SSNA1        | 0.208031 | 5.000898 | 1.095755 | 0.274521 | 0.399293 | -6.4135  |
| FAM164C      | -0.29594 | 0.75245  | -1.09565 | 0.274567 | 0.399317 | -5.70417 |
| MAN1A1       | -0.42228 | 5.591585 | -1.09533 | 0.274707 | 0.39948  | -6.51175 |
| INTS1        | 0.177052 | 7.979343 | 1.09482  | 0.274929 | 0.399762 | -6.50906 |
| ZNF224       | -0.25104 | 3.03338  | -1.0946  | 0.275024 | 0.399858 | -6.12222 |
| HMCN1        | -0.58898 | 3.889111 | -1.09399 | 0.275292 | 0.400206 | -6.3649  |
| SLC15A4      | 0.171212 | 4.575041 | 1.09356  | 0.275481 | 0.400397 | -6.36458 |
| MANSC1       | -0.46566 | 5.605107 | -1.09357 | 0.275475 | 0.400397 | -6.51592 |
| MCPH1        | -0.19118 | 4.4328   | -1.09327 | 0.275606 | 0.400537 | -6.38955 |
| RAB6A        | 0.204653 | 7.648788 | 1.092386 | 0.275995 | 0.401061 | -6.52008 |
| PVR          | 0.27631  | 6.268481 | 1.092082 | 0.276128 | 0.401212 | -6.5178  |
| MED28        | -0.15889 | 4.098623 | -1.09175 | 0.276275 | 0.401342 | -6.33667 |
| MCL1         | -0.21029 | 8.980505 | -1.09181 | 0.276249 | 0.401342 | -6.46758 |
| SYT8         | 1.003505 | 1.677012 | 1.091432 | 0.276413 | 0.401501 | -5.67082 |
| FAM134C      | -0.12887 | 6.152029 | -1.09103 | 0.276588 | 0.401672 | -6.52718 |
| IMMT         | -0.12956 | 6.849456 | -1.09107 | 0.276573 | 0.401672 | -6.53069 |
| CAMTA1       | -0.1904  | 4.472038 | -1.09094 | 0.276628 | 0.401689 | -6.39763 |
| BEND6        | 0.738819 | 0.633495 | 1.090789 | 0.276695 | 0.401744 | -5.55752 |
| HLA-DRB6     | 1.008369 | 0.729937 | 1.090562 | 0.276795 | 0.401847 | -5.53411 |
| BRF2         | 0.253215 | 3.624889 | 1.090463 | 0.276838 | 0.401869 | -6.16001 |
| MRPS15       | 0.197794 | 5.517543 | 1.090184 | 0.276961 | 0.402005 | -6.47525 |
| ZFAND1       | -0.1706  | 5.148488 | -1.08921 | 0.277389 | 0.402584 | -6.47241 |

|           |          |          |          |          |          |          |
|-----------|----------|----------|----------|----------|----------|----------|
| BDNF      | 0.661537 | 0.675889 | 1.088484 | 0.277708 | 0.402892 | -5.57453 |
| TRAPPC5   | 0.241611 | 4.778824 | 1.088544 | 0.277682 | 0.402892 | -6.38959 |
| ETS2      | 0.289991 | 7.75123  | 1.088467 | 0.277716 | 0.402892 | -6.52371 |
| LRP11     | 0.227415 | 6.289676 | 1.088507 | 0.277698 | 0.402892 | -6.52428 |
| LRRC37A2  | -0.25472 | 2.808344 | -1.08816 | 0.277853 | 0.403048 | -6.07972 |
| CLTA      | 0.206218 | 6.900853 | 1.087894 | 0.277968 | 0.403173 | -6.53605 |
| RIPK3     | -0.47121 | 2.986567 | -1.08713 | 0.278303 | 0.4036   | -6.1616  |
| VEGFA     | 0.327098 | 7.242303 | 1.087095 | 0.27832  | 0.4036   | -6.53502 |
| ANKRD36B  | 0.346903 | 2.278496 | 1.086935 | 0.278391 | 0.403661 | -5.87239 |
| PIM1      | -0.36804 | 5.926063 | -1.08685 | 0.278428 | 0.403674 | -6.53127 |
| APLF      | 0.334889 | 1.620322 | 1.086219 | 0.278707 | 0.404035 | -5.76552 |
| KIAA0100  | -0.19939 | 8.002962 | -1.08615 | 0.278736 | 0.404035 | -6.50795 |
| C17orf58  | -0.21398 | 3.001758 | -1.08592 | 0.278838 | 0.404141 | -6.11716 |
| NCCRP1    | 1.659992 | 2.512559 | 1.085768 | 0.278905 | 0.404197 | -5.71921 |
| CCRL2     | 0.627907 | 1.711896 | 1.08561  | 0.278976 | 0.404257 | -5.73502 |
| APRT      | 0.240923 | 5.980026 | 1.085171 | 0.279169 | 0.404496 | -6.51253 |
| 6-Mar     | -0.19888 | 6.920168 | -1.08401 | 0.279684 | 0.405199 | -6.53629 |
| PCDHGA11  | -0.41356 | 0.228676 | -1.08376 | 0.279792 | 0.405295 | -5.65388 |
| RPL11     | -0.2009  | 8.967596 | -1.08373 | 0.279808 | 0.405295 | -6.47699 |
| MPZL3     | 0.411458 | 1.824608 | 1.083644 | 0.279844 | 0.405305 | -5.78735 |
| RRAS      | -0.27513 | 5.381858 | -1.08349 | 0.279912 | 0.405361 | -6.50538 |
| OR2A7     | 0.508996 | 3.636378 | 1.083114 | 0.280079 | 0.405561 | -6.11627 |
| CELSR2    | 0.52493  | 6.841511 | 1.082596 | 0.280308 | 0.405851 | -6.53821 |
| MATR3     | -0.09416 | 8.08307  | -1.08247 | 0.280366 | 0.405893 | -6.51237 |
| MYO7B     | 1.794985 | 2.08992  | 1.082085 | 0.280535 | 0.406053 | -5.63177 |
| CPT1C     | 0.504826 | 1.347201 | 1.082106 | 0.280525 | 0.406053 | -5.70191 |
| HNRNPUL1  | 0.126387 | 8.471927 | 1.08199  | 0.280577 | 0.406072 | -6.50652 |
| PJA1      | 0.274035 | 4.325504 | 1.081647 | 0.280729 | 0.40625  | -6.31928 |
| CXCR7     | 0.631353 | 5.17203  | 1.081278 | 0.280893 | 0.406445 | -6.40321 |
| GDI1      | 0.15505  | 7.161788 | 1.08076  | 0.281122 | 0.406735 | -6.54092 |
| UNKL      | -0.20603 | 3.937358 | -1.08035 | 0.281306 | 0.406959 | -6.32786 |
| TMCO7     | -0.20582 | 3.96255  | -1.08005 | 0.281438 | 0.407108 | -6.33236 |
| HTRA3     | 0.525455 | 5.273642 | 1.079292 | 0.281775 | 0.407552 | -6.43017 |
| C19orf62  | 0.144041 | 5.38758  | 1.079069 | 0.281874 | 0.407653 | -6.47967 |
| CYTH4     | 0.446912 | 2.635273 | 1.078696 | 0.282039 | 0.407851 | -5.93047 |
| SLC25A37  | 0.265003 | 4.815245 | 1.078353 | 0.282192 | 0.407916 | -6.40243 |
| C1GALT1   | 0.385339 | 5.133369 | 1.078478 | 0.282136 | 0.407916 | -6.42804 |
| ASH2L     | -0.20937 | 5.475007 | -1.07833 | 0.282203 | 0.407916 | -6.51342 |
| CLIP1     | -0.27375 | 7.160095 | -1.07845 | 0.282151 | 0.407916 | -6.53647 |
| CDK5RAP2  | -0.20839 | 6.088661 | -1.07827 | 0.282231 | 0.407916 | -6.5411  |
| RPS20     | 0.220674 | 9.027255 | 1.078129 | 0.282292 | 0.407963 | -6.49408 |
| SPRR1B    | 2.897339 | 5.113465 | 1.077964 | 0.282365 | 0.407984 | -5.97822 |
| BET1      | 0.25053  | 4.580573 | 1.078017 | 0.282342 | 0.407984 | -6.37018 |
| LXN       | 0.439877 | 2.957355 | 1.077609 | 0.282523 | 0.408049 | -5.9915  |
| DPAGT1    | 0.243038 | 5.502147 | 1.077581 | 0.282536 | 0.408049 | -6.4834  |
| DENND1A   | -0.17443 | 5.451504 | -1.07757 | 0.28254  | 0.408049 | -6.51037 |
| RABAC1    | -0.22379 | 5.433215 | -1.07754 | 0.282556 | 0.408049 | -6.51213 |
| MAP1LC3B  | -0.16948 | 6.474182 | -1.07757 | 0.28254  | 0.408049 | -6.54711 |
| ZNF638    | -0.13995 | 6.621591 | -1.07746 | 0.282589 | 0.408054 | -6.5473  |
| PPP2R5E   | 0.168674 | 5.726372 | 1.077344 | 0.282641 | 0.408088 | -6.50849 |
| PLXNC1    | 0.610675 | 2.529262 | 1.076839 | 0.282866 | 0.40837  | -5.88869 |
| FOXC2     | 0.773557 | 0.45762  | 1.075871 | 0.283298 | 0.408923 | -5.54225 |
| DDX3Y     | 1.548447 | 3.047681 | 1.075849 | 0.283308 | 0.408923 | -5.83813 |
| YBX2      | 0.915814 | 1.357547 | 1.075526 | 0.283452 | 0.409047 | -5.65259 |
| C20orf196 | 0.292433 | 1.275597 | 1.075535 | 0.283448 | 0.409047 | -5.72542 |
| PDDC1     | -0.19485 | 5.320623 | -1.0747  | 0.283822 | 0.409538 | -6.50479 |
| MAPK1IP1L | -0.13963 | 7.238921 | -1.07451 | 0.283905 | 0.409616 | -6.5415  |
| PAF1      | -0.14696 | 5.613808 | -1.07434 | 0.283982 | 0.409685 | -6.52303 |

|           |          |          |          |          |          |          |
|-----------|----------|----------|----------|----------|----------|----------|
| CAMSAP1   | 0.217138 | 6.04065  | 1.07403  | 0.28412  | 0.409842 | -6.52923 |
| CDK9      | 0.13472  | 5.451837 | 1.07379  | 0.284227 | 0.409912 | -6.49206 |
| BAIAP2    | -0.39535 | 6.340822 | -1.07385 | 0.284202 | 0.409912 | -6.5511  |
| FDFT1     | 0.337989 | 7.000364 | 1.073655 | 0.284288 | 0.409957 | -6.5512  |
| C14orf102 | -0.13907 | 3.799131 | -1.07343 | 0.284387 | 0.410057 | -6.2945  |
| VAMP1     | -0.23677 | 2.715791 | -1.07321 | 0.284485 | 0.410114 | -6.07338 |
| ASL       | -0.38986 | 4.780954 | -1.07326 | 0.284466 | 0.410114 | -6.47191 |
| ATG9B     | 0.744976 | 1.655062 | 1.071657 | 0.285182 | 0.411105 | -5.72671 |
| BIN2      | 0.437329 | 2.250974 | 1.071633 | 0.285193 | 0.411105 | -5.87171 |
| GPR137C   | 0.413209 | 0.369179 | 1.071466 | 0.285268 | 0.411115 | -5.57959 |
| MRPS18C   | -0.1533  | 3.534916 | -1.07101 | 0.285473 | 0.411369 | -6.24231 |
| ACPP      | 0.723648 | 3.234571 | 1.070942 | 0.285503 | 0.411137 | -6.00468 |
| AKR1B10   | -1.08538 | 5.362006 | -1.07072 | 0.285601 | 0.411469 | -6.54835 |
| ARPC4     | 0.170171 | 6.551971 | 1.070602 | 0.285656 | 0.411504 | -6.55192 |
| ZNF384    | 0.136061 | 6.156361 | 1.070519 | 0.285693 | 0.411515 | -6.54159 |
| KCTD15    | -0.46558 | 5.009295 | -1.07028 | 0.285801 | 0.411629 | -6.50434 |
| GCA       | -0.29683 | 4.141998 | -1.06953 | 0.286137 | 0.412107 | -6.38641 |
| FAM82A2   | -0.1585  | 4.995694 | -1.06941 | 0.286189 | 0.412103 | -6.4777  |
| KANK4     | -0.76    | 0.286518 | -1.06918 | 0.286292 | 0.412209 | -5.71963 |
| SOX15     | 1.340379 | 3.463918 | 1.069047 | 0.286354 | 0.412213 | -5.94995 |
| AARS2     | 0.245435 | 4.641324 | 1.06907  | 0.286343 | 0.412213 | -6.39014 |
| PDCD1LG2  | 0.51819  | 1.055549 | 1.068883 | 0.286427 | 0.412248 | -5.66807 |
| GPX7      | 0.505215 | 2.456936 | 1.068795 | 0.286467 | 0.412248 | -5.9009  |
| PAN2      | -0.20426 | 5.15643  | -1.06886 | 0.28644  | 0.412248 | -6.49768 |
| LRR4      | -0.65973 | 2.292325 | -1.06851 | 0.286593 | 0.412387 | -6.07212 |
| MYO1F     | 0.449499 | 3.20824  | 1.068315 | 0.286683 | 0.412474 | -6.05458 |
| NARS2     | 0.212001 | 3.944561 | 1.068034 | 0.28681  | 0.412614 | -6.26313 |
| ZFP1      | 0.181554 | 3.446219 | 1.067811 | 0.28691  | 0.412715 | -6.16123 |
| CSNK1A1   | -0.19937 | 8.092048 | -1.0677  | 0.286961 | 0.412746 | -6.52482 |
| RSPH3     | -0.19307 | 3.239894 | -1.067   | 0.287273 | 0.413152 | -6.1886  |
| EYA3      | 0.214026 | 3.617401 | 1.066823 | 0.287354 | 0.413227 | -6.19221 |
| NUP43     | 0.163398 | 5.27664  | 1.065964 | 0.287742 | 0.413742 | -6.48083 |
| PI4K2B    | -0.17219 | 5.5041   | -1.06564 | 0.287887 | 0.413908 | -6.52647 |
| C4orf33   | -0.27297 | 3.265792 | -1.06528 | 0.288051 | 0.414101 | -6.20883 |
| AFAP1L2   | 0.440144 | 4.989966 | 1.065196 | 0.288088 | 0.414112 | -6.41964 |
| EIF2B3    | 0.165805 | 3.843099 | 1.06476  | 0.288285 | 0.41431  | -6.25513 |
| C9orf25   | 0.241141 | 4.652    | 1.064764 | 0.288283 | 0.41431  | -6.39759 |
| SLC25A5   | -0.20483 | 8.396059 | -1.06459 | 0.28836  | 0.414375 | -6.51741 |
| CDRT1     | 0.573224 | -0.05913 | 1.064379 | 0.288457 | 0.414471 | -5.5128  |
| FAM192A   | 0.140238 | 5.603513 | 1.06339  | 0.288904 | 0.415059 | -6.51563 |
| RPS25     | -0.2373  | 7.297318 | -1.06334 | 0.288926 | 0.415059 | -6.55029 |
| REV1      | -0.15    | 5.330589 | -1.06319 | 0.288993 | 0.415114 | -6.51477 |
| BRD3      | 0.183545 | 5.729079 | 1.06294  | 0.289107 | 0.415235 | -6.52296 |
| HPS5      | 0.160723 | 4.753079 | 1.062623 | 0.289251 | 0.415399 | -6.42374 |
| TMEM14C   | -0.20062 | 5.710903 | -1.06255 | 0.289286 | 0.415407 | -6.54351 |
| TTC8      | 0.214575 | 3.827125 | 1.062048 | 0.289511 | 0.415681 | -6.24579 |
| USP24     | -0.14719 | 6.619547 | -1.06199 | 0.289536 | 0.415681 | -6.5637  |
| PHLPP1    | -0.25607 | 5.291542 | -1.06137 | 0.289818 | 0.416043 | -6.52123 |
| ZNF845    | -0.26651 | 3.326527 | -1.06111 | 0.289938 | 0.416128 | -6.22936 |
| POMT2     | 0.201998 | 4.330886 | 1.061131 | 0.289927 | 0.416128 | -6.35336 |
| GPR65     | 0.432952 | 0.586773 | 1.060827 | 0.290065 | 0.416253 | -5.61882 |
| ZNF518B   | -0.53464 | 3.668039 | -1.06078 | 0.290084 | 0.416253 | -6.35477 |
| RIN2      | 0.238763 | 6.161647 | 1.059814 | 0.290524 | 0.416841 | -6.54915 |
| LY6D      | 2.711151 | 4.172061 | 1.059432 | 0.290698 | 0.417043 | -5.86499 |
| NT5E      | 0.544572 | 5.308475 | 1.059373 | 0.290724 | 0.417043 | -6.45262 |
| SMAD5     | -0.1689  | 6.357045 | -1.05917 | 0.290815 | 0.417131 | -6.56567 |
| NUDT6     | -0.26261 | 0.663947 | -1.05892 | 0.29093  | 0.417253 | -5.72406 |
| C20orf94  | 0.272589 | 1.251732 | 1.058626 | 0.291064 | 0.417401 | -5.74077 |

|          |          |          |          |          |          |          |
|----------|----------|----------|----------|----------|----------|----------|
| MTMR4    | -0.17612 | 5.827628 | -1.05816 | 0.291274 | 0.417659 | -6.55253 |
| S1PR4    | -0.43711 | 0.763084 | -1.05752 | 0.291568 | 0.418039 | -5.76692 |
| ITGB5    | 0.234268 | 7.041112 | 1.057282 | 0.291675 | 0.418149 | -6.56806 |
| SLC9A3R1 | 0.358698 | 7.608207 | 1.056879 | 0.291858 | 0.418369 | -6.56152 |
| TBC1D10A | -0.2451  | 4.530318 | -1.05659 | 0.29199  | 0.418515 | -6.44777 |
| LYSMD4   | -0.202   | 3.359908 | -1.05649 | 0.292033 | 0.418534 | -6.22775 |
| BNC1     | 2.24513  | 2.68439  | 1.055774 | 0.292362 | 0.418962 | -5.69605 |
| TUBGCP4  | 0.165974 | 4.387614 | 1.055652 | 0.292417 | 0.418999 | -6.37493 |
| ARMC1    | 0.157594 | 5.253956 | 1.055451 | 0.292509 | 0.419087 | -6.49031 |
| NAV3     | -0.59082 | 1.06158  | -1.05516 | 0.292642 | 0.419234 | -5.84059 |
| DGCR6L   | -0.22955 | 4.530402 | -1.05502 | 0.292708 | 0.419286 | -6.44764 |
| ATMIN    | -0.14514 | 6.2721   | -1.05483 | 0.292794 | 0.419366 | -6.56867 |
| DDIT3    | 0.283177 | 4.051935 | 1.054665 | 0.292868 | 0.419429 | -6.28724 |
| NME4     | -0.31545 | 4.911092 | -1.05453 | 0.292927 | 0.419471 | -6.49914 |
| LYRM4    | 0.232047 | 3.812568 | 1.054221 | 0.29307  | 0.419633 | -6.24662 |
| MAP3K10  | -0.17427 | 4.330882 | -1.05397 | 0.293183 | 0.419752 | -6.41572 |
| FAM133B  | 0.251326 | 2.363432 | 1.053847 | 0.293241 | 0.419791 | -5.93817 |
| FOXC1    | 0.451371 | 4.523345 | 1.053769 | 0.293276 | 0.419799 | -6.35652 |
| EXOC3L2  | 0.336088 | 1.761376 | 1.053394 | 0.293448 | 0.419984 | -5.82053 |
| SHANK2   | -0.54242 | 4.908576 | -1.05336 | 0.293466 | 0.419984 | -6.51819 |
| MMACHC   | 0.271629 | 2.614099 | 1.053053 | 0.293604 | 0.420139 | -5.97852 |
| RPL18    | 0.201755 | 8.973674 | 1.052723 | 0.293755 | 0.420312 | -6.52224 |
| MTRF1    | -0.25965 | 2.910121 | -1.0518  | 0.294179 | 0.420876 | -6.13925 |
| HES6     | 0.537943 | 2.499369 | 1.051411 | 0.294355 | 0.421041 | -5.91671 |
| ANKRD42  | -0.24609 | 3.195872 | -1.05144 | 0.294343 | 0.421041 | -6.20407 |
| LGR5     | 1.165044 | 1.561867 | 1.051142 | 0.294478 | 0.421131 | -5.67101 |
| RTN3     | 0.160672 | 7.025071 | 1.051183 | 0.294459 | 0.421131 | -6.57406 |
| CELF1    | 0.129772 | 6.64661  | 1.050939 | 0.294571 | 0.421221 | -6.5745  |
| TXNRD1   | 0.375174 | 7.260392 | 1.050079 | 0.294966 | 0.421742 | -6.5746  |
| C8orf41  | 0.215323 | 3.611856 | 1.04985  | 0.29507  | 0.421848 | -6.20726 |
| FAM21A   | -0.25215 | 4.752524 | -1.04963 | 0.295171 | 0.421948 | -6.48176 |
| TOMM70A  | 0.156332 | 6.754347 | 1.049549 | 0.295209 | 0.42196  | -6.5766  |
| FRS3     | 0.25063  | 2.149947 | 1.048911 | 0.295501 | 0.422335 | -5.90478 |
| PLD2     | 0.284587 | 5.425347 | 1.048562 | 0.295662 | 0.422521 | -6.50339 |
| SOCS4    | -0.16876 | 5.450868 | -1.04812 | 0.295863 | 0.422766 | -6.54106 |
| CBR1     | -0.42138 | 5.971477 | -1.04785 | 0.295987 | 0.422856 | -6.57472 |
| EDEM1    | -0.19366 | 6.207899 | -1.04787 | 0.295981 | 0.422856 | -6.57551 |
| RNF41    | -0.13094 | 5.153548 | -1.04775 | 0.296035 | 0.422882 | -6.51387 |
| SMO      | -0.57509 | 3.805517 | -1.04721 | 0.296285 | 0.423195 | -6.39984 |
| RLTPR    | 0.648976 | 0.750195 | 1.046816 | 0.296464 | 0.423408 | -5.62819 |
| KLF8     | -0.55341 | 2.969841 | -1.04607 | 0.296809 | 0.423857 | -6.22944 |
| DNTTIP2  | 0.142711 | 6.019829 | 1.045796 | 0.296934 | 0.423992 | -6.56122 |
| SALL1    | 0.759126 | 0.808301 | 1.045413 | 0.297111 | 0.424128 | -5.61946 |
| CD247    | 0.515715 | 0.675316 | 1.045477 | 0.297081 | 0.424128 | -5.63614 |
| ZNF20    | -0.2252  | 2.150004 | -1.04539 | 0.29712  | 0.424128 | -5.98405 |
| ARHGAP25 | 0.371938 | 2.858886 | 1.045303 | 0.297161 | 0.424138 | -6.02015 |
| UBQLN1   | 0.148219 | 7.168296 | 1.045245 | 0.297188 | 0.424138 | -6.57821 |
| ZNF124   | 0.296858 | 1.999733 | 1.044997 | 0.297302 | 0.424228 | -5.87598 |
| CYP4F11  | 1.458971 | 3.366352 | 1.044886 | 0.297353 | 0.424228 | -5.9325  |
| DGAT2    | 0.561346 | 3.910296 | 1.044844 | 0.297373 | 0.424228 | -6.20934 |
| FAM120A  | 0.162981 | 8.69833  | 1.044943 | 0.297327 | 0.424228 | -6.53883 |
| KDM5D    | 1.45584  | 2.389835 | 1.044388 | 0.297583 | 0.424478 | -5.7758  |
| TRPC6    | -0.35953 | 1.981485 | -1.04433 | 0.297609 | 0.424478 | -5.97949 |
| LPXN     | 0.356704 | 3.221829 | 1.044125 | 0.297704 | 0.42457  | -6.09824 |
| ITGA4    | 0.451379 | 3.939727 | 1.044061 | 0.297734 | 0.42457  | -6.24149 |
| TMEM62   | 0.313737 | 4.238715 | 1.043733 | 0.297885 | 0.424743 | -6.33093 |
| CEP110   | 0.230096 | 4.799435 | 1.043661 | 0.297919 | 0.424747 | -6.4407  |
| NDRG1    | 0.508322 | 9.288198 | 1.04342  | 0.29803  | 0.424862 | -6.5304  |

|          |          |          |          |          |          |          |
|----------|----------|----------|----------|----------|----------|----------|
| LMAN2    | 0.177611 | 6.536874 | 1.043045 | 0.298203 | 0.425066 | -6.58044 |
| SLC16A6  | 0.516068 | 0.75855  | 1.042929 | 0.298256 | 0.425098 | -5.65184 |
| N4BP2L1  | -0.35927 | 2.70612  | -1.0428  | 0.298318 | 0.425143 | -6.12802 |
| CHMP2B   | -0.2438  | 5.56946  | -1.04241 | 0.298497 | 0.425355 | -6.55903 |
| BTBD10   | 0.164626 | 5.067166 | 1.042101 | 0.298639 | 0.425513 | -6.48309 |
| CHST11   | 0.500027 | 3.363245 | 1.04178  | 0.298788 | 0.425682 | -6.10306 |
| TNPO3    | -0.15279 | 5.926832 | -1.04132 | 0.299    | 0.425941 | -6.57336 |
| C4orf10  | -0.22475 | 4.007864 | -1.04062 | 0.299325 | 0.42636  | -6.38438 |
| BCL11A   | 0.726999 | 4.002047 | 1.040105 | 0.299563 | 0.426563 | -6.20546 |
| POLR3F   | 0.167044 | 3.64362  | 1.040052 | 0.299588 | 0.426563 | -6.23504 |
| SLC16A2  | -0.41475 | 3.76276  | -1.03999 | 0.299614 | 0.426563 | -6.37018 |
| SCYL3    | -0.13829 | 4.107558 | -1.0399  | 0.299657 | 0.426563 | -6.38978 |
| ANKRD50  | -0.25445 | 5.75971  | -1.03979 | 0.299711 | 0.426563 | -6.57177 |
| ALDH3A1  | -0.99692 | 5.389157 | -1.04021 | 0.299516 | 0.426563 | -6.57959 |
| VAT1     | -0.23619 | 6.882395 | -1.03985 | 0.299682 | 0.426563 | -6.58294 |
| SEC24D   | -0.25122 | 6.171437 | -1.03997 | 0.299625 | 0.426563 | -6.58395 |
| LIN37    | 0.220593 | 2.603613 | 1.039171 | 0.299996 | 0.426918 | -6.00219 |
| EIF2C1   | -0.17708 | 5.93432  | -1.03912 | 0.300022 | 0.426918 | -6.57671 |
| NTM      | 0.588335 | 1.899797 | 1.038799 | 0.300169 | 0.427051 | -5.82469 |
| FBXO17   | -0.53006 | 2.090895 | -1.03878 | 0.300177 | 0.427051 | -6.03573 |
| TEAD3    | -0.18899 | 6.017089 | -1.03808 | 0.300503 | 0.427472 | -6.58097 |
| KIAA0892 | -0.13334 | 6.440838 | -1.03801 | 0.300534 | 0.427473 | -6.58827 |
| LUC7L2   | -0.12781 | 6.505271 | -1.03792 | 0.300576 | 0.427488 | -6.58874 |
| ATE1     | -0.1938  | 4.078728 | -1.0378  | 0.300631 | 0.427523 | -6.39562 |
| B3GNT8   | 0.515527 | 2.851493 | 1.037547 | 0.30075  | 0.427649 | -6.00211 |
| RYR1     | 1.065946 | 2.362271 | 1.037473 | 0.300785 | 0.427655 | -5.83544 |
| ZNF611   | -0.30942 | 3.199915 | -1.03734 | 0.300844 | 0.427696 | -6.23299 |
| APTX     | 0.189608 | 4.274874 | 1.03722  | 0.300902 | 0.427734 | -6.369   |
| PAPD5    | -0.16295 | 4.622642 | -1.03628 | 0.301341 | 0.428227 | -6.47091 |
| COPA     | 0.136776 | 8.239889 | 1.036325 | 0.301318 | 0.428227 | -6.56235 |
| SLC6A6   | 0.282246 | 6.125385 | 1.036359 | 0.301302 | 0.428227 | -6.56991 |
| ITGAE    | 0.215079 | 3.674208 | 1.036116 | 0.301416 | 0.42829  | -6.23727 |
| SH2D4A   | -0.33647 | 4.403384 | -1.03597 | 0.301485 | 0.428345 | -6.46136 |
| FAM199X  | 0.167632 | 5.145357 | 1.035893 | 0.301519 | 0.42835  | -6.49779 |
| KIAA1009 | -0.18075 | 3.235736 | -1.03576 | 0.301581 | 0.428395 | -6.21675 |
| PLAC8    | -0.77192 | 3.417301 | -1.03541 | 0.301746 | 0.428542 | -6.36488 |
| SLC31A1  | -0.19758 | 6.150639 | -1.03546 | 0.301723 | 0.428542 | -6.58726 |
| FAM50A   | 0.202234 | 5.369714 | 1.035304 | 0.301794 | 0.428566 | -6.51866 |
| FAH      | 0.264022 | 3.622634 | 1.035219 | 0.301833 | 0.428578 | -6.21542 |
| PIP5K1A  | 0.146122 | 6.130985 | 1.035096 | 0.30189  | 0.428616 | -6.57722 |
| ACHE     | 0.945771 | 2.100884 | 1.035006 | 0.301932 | 0.428632 | -5.80534 |
| BSG      | -0.20815 | 9.12618  | -1.03466 | 0.302093 | 0.428817 | -6.52277 |
| ALOX12B  | 1.161159 | 0.935907 | 1.034401 | 0.302214 | 0.428901 | -5.60283 |
| ANAPC2   | -0.14072 | 5.308083 | -1.03445 | 0.302191 | 0.428901 | -6.54195 |
| CCDC93   | -0.16565 | 5.567367 | -1.03429 | 0.302265 | 0.42893  | -6.56297 |
| MRPS6    | 0.200739 | 4.474242 | 1.034057 | 0.302374 | 0.429042 | -6.40761 |
| ZNF496   | -0.20422 | 4.351831 | -1.03378 | 0.302502 | 0.429136 | -6.44352 |
| ELL      | -0.14281 | 4.898713 | -1.03383 | 0.302483 | 0.429136 | -6.50359 |
| GUSB     | 0.240759 | 5.856833 | 1.033516 | 0.302627 | 0.429269 | -6.55876 |
| CDK13    | 0.136763 | 6.36167  | 1.033445 | 0.30266  | 0.429272 | -6.58719 |
| PTPN18   | -0.24887 | 5.942727 | -1.03337 | 0.302695 | 0.429278 | -6.58501 |
| WDFY1    | 0.16746  | 6.207736 | 1.033265 | 0.302744 | 0.429305 | -6.58142 |
| NDUFA11  | -0.17272 | 5.440924 | -1.03177 | 0.303444 | 0.430254 | -6.55749 |
| TMUB2    | 0.13482  | 5.262207 | 1.031684 | 0.303482 | 0.430264 | -6.51769 |
| C4orf27  | -0.17831 | 3.262814 | -1.0315  | 0.303568 | 0.430343 | -6.22872 |
| DDX28    | 0.205942 | 3.815227 | 1.031122 | 0.303745 | 0.43055  | -6.27598 |
| ZNF117   | 0.485022 | 5.941931 | 1.03083  | 0.303882 | 0.430695 | -6.5517  |
| ABHD4    | -0.27143 | 5.871425 | -1.03077 | 0.303909 | 0.430695 | -6.58602 |

|           |          |          |          |          |          |          |
|-----------|----------|----------|----------|----------|----------|----------|
| ATP6AP1   | 0.135444 | 7.217535 | 1.030691 | 0.303947 | 0.430704 | -6.59224 |
| CPNE8     | 0.46763  | 3.787572 | 1.030416 | 0.304076 | 0.430799 | -6.21942 |
| OASL      | 0.60652  | 4.043312 | 1.030446 | 0.304062 | 0.430799 | -6.23821 |
| C15orf38  | -0.21745 | 4.262518 | -1.03021 | 0.304172 | 0.430849 | -6.43533 |
| CYHR1     | 0.18474  | 4.781166 | 1.030213 | 0.304171 | 0.430849 | -6.45763 |
| ALOX5AP   | 0.40855  | 3.109874 | 1.029881 | 0.304326 | 0.430981 | -6.08102 |
| ZSWIM1    | 0.151655 | 4.39347  | 1.029752 | 0.304386 | 0.430981 | -6.4051  |
| TMX3      | -0.19192 | 5.597796 | -1.02978 | 0.304372 | 0.430981 | -6.57109 |
| ARHGAP5   | -0.23669 | 7.432133 | -1.02971 | 0.304406 | 0.430981 | -6.58223 |
| UBQLN2    | 0.176826 | 6.529807 | 1.02968  | 0.30442  | 0.430981 | -6.5941  |
| AIFM2     | 0.275287 | 4.328374 | 1.028962 | 0.304757 | 0.431327 | -6.37469 |
| PDGFB     | 0.32101  | 4.588219 | 1.029052 | 0.304714 | 0.431327 | -6.41307 |
| UTP11L    | 0.158516 | 5.015358 | 1.029008 | 0.304735 | 0.431327 | -6.49154 |
| LOC388955 | 0.27251  | 4.216127 | 1.028536 | 0.304956 | 0.431565 | -6.35105 |
| ZNF512    | -0.21695 | 4.710118 | -1.02696 | 0.305694 | 0.432563 | -6.49678 |
| TGOLN2    | -0.21881 | 8.198313 | -1.0269  | 0.305723 | 0.432563 | -6.563   |
| PRR4      | -0.38706 | 1.136312 | -1.02639 | 0.305965 | 0.432686 | -5.85133 |
| NAT6      | -0.18895 | 2.825877 | -1.02659 | 0.305869 | 0.432686 | -6.13366 |
| ZNF337    | -0.19632 | 4.267341 | -1.02647 | 0.305924 | 0.432686 | -6.43771 |
| LARS2     | -0.16045 | 4.626602 | -1.02645 | 0.305935 | 0.432686 | -6.48105 |
| PMPCB     | -0.15389 | 6.070459 | -1.02645 | 0.305937 | 0.432686 | -6.5935  |
| BFSP1     | 0.417412 | 1.046821 | 1.026289 | 0.306011 | 0.432708 | -5.72375 |
| C9orf116  | 0.384918 | 0.177811 | 1.025781 | 0.30625  | 0.433002 | -5.60142 |
| KLF7      | -0.42822 | 3.164922 | -1.02531 | 0.306472 | 0.433185 | -6.26316 |
| KRTCAP2   | 0.213138 | 6.127908 | 1.02533  | 0.306462 | 0.433185 | -6.5843  |
| RB1CC1    | -0.19367 | 6.689175 | -1.02533 | 0.306462 | 0.433185 | -6.60097 |
| GRB14     | 0.839081 | 0.239128 | 1.025153 | 0.306545 | 0.433244 | -5.55765 |
| 11-Sep    | 0.196688 | 6.918189 | 1.025085 | 0.306577 | 0.433246 | -6.6019  |
| CRELD2    | -0.2047  | 4.974669 | -1.02404 | 0.307072 | 0.4339   | -6.5264  |
| LASS3     | 1.929922 | 1.939146 | 1.023231 | 0.307451 | 0.434392 | -5.65788 |
| SPRR2D    | 2.259371 | 2.546462 | 1.023095 | 0.307515 | 0.434438 | -5.70062 |
| TFPT      | 0.211731 | 3.015567 | 1.022569 | 0.307763 | 0.434704 | -6.10288 |
| CCDC113   | -0.42418 | 2.626058 | -1.02256 | 0.307765 | 0.434704 | -6.14177 |
| DNAJB6    | 0.227415 | 5.819303 | 1.022268 | 0.307905 | 0.434858 | -6.5689  |
| FAM50B    | -0.42416 | 2.650928 | -1.02199 | 0.308034 | 0.434996 | -6.14721 |
| RREB1     | -0.20713 | 7.175126 | -1.0214  | 0.308314 | 0.435348 | -6.59683 |
| C16orf7   | -0.23901 | 4.149118 | -1.0212  | 0.308408 | 0.435436 | -6.43147 |
| TMEM160   | 0.20797  | 3.23206  | 1.021123 | 0.308446 | 0.435446 | -6.15262 |
| PRSS53    | 0.316131 | 0.751425 | 1.020882 | 0.30856  | 0.435563 | -5.69681 |
| KIAA0586  | 0.178076 | 4.331237 | 1.020079 | 0.30894  | 0.436055 | -6.4002  |
| RNASEH2B  | 0.192824 | 4.183812 | 1.019859 | 0.309043 | 0.436157 | -6.36902 |
| ALKBH1    | -0.12365 | 3.611722 | -1.01964 | 0.309147 | 0.43626  | -6.30613 |
| NFYA      | 0.212961 | 5.483299 | 1.019463 | 0.309231 | 0.436333 | -6.54488 |
| TIMM9     | 0.1585   | 4.448466 | 1.019162 | 0.309373 | 0.43649  | -6.42398 |
| CHD1L     | 0.176325 | 5.243644 | 1.01891  | 0.309493 | 0.436579 | -6.52475 |
| SLC35F5   | -0.17609 | 5.622743 | -1.0189  | 0.309498 | 0.436579 | -6.58261 |
| ZNF473    | 0.197707 | 3.907928 | 1.018622 | 0.309629 | 0.436719 | -6.31014 |
| FOXE1     | 2.128308 | 2.028216 | 1.018324 | 0.30977  | 0.436874 | -5.65086 |
| UPK1B     | -1.04725 | 0.80033  | -1.018   | 0.309924 | 0.437002 | -5.90161 |
| TIMM8B    | 0.235376 | 4.100938 | 1.018013 | 0.309918 | 0.437002 | -6.34603 |
| KIAA0802  | 0.390913 | 4.900675 | 1.017868 | 0.309986 | 0.437002 | -6.46263 |
| MRPL41    | -0.21948 | 4.663412 | -1.0179  | 0.30997  | 0.437002 | -6.49979 |
| RAB7L1    | 0.247018 | 4.279523 | 1.017694 | 0.310069 | 0.437075 | -6.38019 |
| RPS6      | -0.24297 | 9.314626 | -1.01674 | 0.310522 | 0.437669 | -6.53354 |
| DDI2      | 0.239037 | 3.50594  | 1.01655  | 0.310612 | 0.437751 | -6.214   |
| RNF4      | -0.14324 | 6.12787  | -1.01626 | 0.310749 | 0.437901 | -6.60511 |
| CHMP1A    | 0.159907 | 6.549031 | 1.015906 | 0.310917 | 0.438094 | -6.60871 |
| COPS7B    | 0.149952 | 4.794898 | 1.015751 | 0.310991 | 0.438153 | -6.47807 |

|          |          |          |          |          |          |          |
|----------|----------|----------|----------|----------|----------|----------|
| DOLK     | 0.170905 | 4.362202 | 1.015663 | 0.311033 | 0.438168 | -6.41017 |
| SIX5     | -0.22231 | 4.762038 | -1.01511 | 0.311297 | 0.438495 | -6.5153  |
| DNAJC12  | 0.690037 | 0.563013 | 1.014758 | 0.311463 | 0.438686 | -5.62782 |
| IRX4     | 1.661878 | 0.823106 | 1.014318 | 0.311673 | 0.438892 | -5.56426 |
| ATG4D    | 0.222434 | 4.564903 | 1.014367 | 0.311649 | 0.438892 | -6.43859 |
| ZNF544   | 0.23573  | 4.740156 | 1.014197 | 0.31173  | 0.438929 | -6.46283 |
| CES3     | 0.963895 | 1.632829 | 1.013729 | 0.311953 | 0.439066 | -5.74732 |
| IL18R1   | -0.40408 | 2.189481 | -1.01386 | 0.311891 | 0.439066 | -6.05251 |
| SEZ6L2   | 0.549925 | 5.493945 | 1.013733 | 0.311951 | 0.439066 | -6.51817 |
| ANXA7    | 0.139308 | 6.502653 | 1.013765 | 0.311936 | 0.439066 | -6.61039 |
| FBN2     | 0.880956 | 2.917596 | 1.013345 | 0.312136 | 0.439279 | -5.9762  |
| MFSD3    | 0.277515 | 3.524551 | 1.013272 | 0.31217  | 0.439283 | -6.20943 |
| ATG4B    | -0.12808 | 5.471134 | -1.01308 | 0.31226  | 0.439365 | -6.57575 |
| ZNF841   | -0.33331 | 3.894971 | -1.01293 | 0.312331 | 0.439377 | -6.40921 |
| C11orf49 | -0.20468 | 4.447362 | -1.01297 | 0.312313 | 0.439377 | -6.4766  |
| NDEL1    | -0.20665 | 5.767844 | -1.01285 | 0.312373 | 0.439392 | -6.5977  |
| C10orf95 | 0.37577  | 0.560801 | 1.012532 | 0.312523 | 0.439558 | -5.66812 |
| VKORC1L1 | 0.185476 | 6.071202 | 1.011802 | 0.312871 | 0.440004 | -6.59652 |
| SNX30    | 0.202388 | 5.03174  | 1.011171 | 0.313172 | 0.440338 | -6.50636 |
| UGGT1    | 0.151505 | 7.301755 | 1.011199 | 0.313159 | 0.440338 | -6.61079 |
| ITK      | -0.48635 | 1.556555 | -1.01073 | 0.313381 | 0.440523 | -5.9551  |
| USP21    | 0.169289 | 4.796109 | 1.010698 | 0.313398 | 0.440523 | -6.48149 |
| ALMS1    | 0.207622 | 5.604895 | 1.010765 | 0.313366 | 0.440523 | -6.56492 |
| FUCA2    | 0.256743 | 5.917759 | 1.010591 | 0.313449 | 0.440551 | -6.58516 |
| PRR12    | 0.149812 | 6.660946 | 1.010305 | 0.313586 | 0.440698 | -6.61604 |
| SYT1     | 0.767327 | 2.525635 | 1.010024 | 0.31372  | 0.440842 | -5.93386 |
| KIAA1211 | 0.686473 | 3.317179 | 1.009276 | 0.314078 | 0.441301 | -6.0868  |
| GGCX     | 0.166809 | 4.853364 | 1.009139 | 0.314143 | 0.441348 | -6.49009 |
| ENTPD1   | -0.22419 | 5.830841 | -1.00892 | 0.31425  | 0.441454 | -6.60511 |
| PMS2L3   | 0.20478  | 1.222569 | 1.008561 | 0.31442  | 0.441604 | -5.79637 |
| CLTB     | -0.30104 | 6.728417 | -1.00859 | 0.314405 | 0.441604 | -6.61621 |
| CDYL2    | -0.38221 | 1.402646 | -1.00834 | 0.314526 | 0.441708 | -5.91354 |
| ACAD9    | 0.167758 | 5.434244 | 1.008143 | 0.31462  | 0.441796 | -6.55569 |
| CD2      | 0.52683  | 2.508038 | 1.007364 | 0.314993 | 0.442231 | -5.96741 |
| TRA2A    | 0.147175 | 5.325054 | 1.007425 | 0.314964 | 0.442231 | -6.54743 |
| SNRNP48  | 0.165874 | 4.529481 | 1.007217 | 0.315063 | 0.442241 | -6.44716 |
| SLC25A11 | -0.14944 | 5.171735 | -1.00728 | 0.315032 | 0.442241 | -6.55823 |
| ZFY      | 1.230026 | 1.642348 | 1.006933 | 0.3152   | 0.442371 | -5.72629 |
| EPS8L3   | -1.38897 | 0.968517 | -1.00689 | 0.315219 | 0.442371 | -5.97952 |
| L3MBTL   | -0.37906 | 2.604821 | -1.0068  | 0.315262 | 0.442387 | -6.14594 |
| FBXO28   | 0.138709 | 6.201365 | 1.006479 | 0.315417 | 0.442559 | -6.60934 |
| CALU     | 0.206347 | 7.342519 | 1.006241 | 0.315532 | 0.442676 | -6.61591 |
| STX18    | -0.17843 | 4.032122 | -1.00601 | 0.315644 | 0.442789 | -6.41612 |
| STEAP3   | -0.28172 | 5.989219 | -1.00594 | 0.315677 | 0.44279  | -6.61496 |
| NPAT     | 0.159347 | 5.000459 | 1.005438 | 0.315917 | 0.443083 | -6.51301 |
| DPCD     | 0.236199 | 2.762844 | 1.004825 | 0.316211 | 0.443428 | -6.06463 |
| RFXAP    | -0.21757 | 2.506198 | -1.00479 | 0.316227 | 0.443428 | -6.09466 |
| TRAPPC6B | -0.14854 | 4.893732 | -1.00464 | 0.316301 | 0.443488 | -6.53313 |
| CLPTM1   | -0.13564 | 7.461642 | -1.00443 | 0.316401 | 0.443584 | -6.60913 |
| L2HGDH   | -0.1914  | 4.07683  | -1.00341 | 0.316891 | 0.444226 | -6.42936 |
| RPL29    | -0.24281 | 8.452351 | -1.00308 | 0.317048 | 0.444401 | -6.57738 |
| CEACAM5  | 1.284002 | 7.148152 | 1.002737 | 0.317215 | 0.444591 | -6.60759 |
| SIN3B    | -0.14856 | 6.184828 | -1.00228 | 0.317434 | 0.444854 | -6.62068 |
| KLHL12   | 0.151333 | 5.259592 | 1.002023 | 0.317559 | 0.444984 | -6.54585 |
| C7orf43  | 0.192232 | 4.592009 | 1.001777 | 0.317678 | 0.445061 | -6.45872 |
| HLA-DPA1 | 0.472843 | 6.507494 | 1.001801 | 0.317666 | 0.445061 | -6.61396 |
| C17orf71 | 0.143235 | 4.360592 | 1.00147  | 0.317825 | 0.445159 | -6.42933 |
| UHMK1    | 0.250352 | 5.300715 | 1.001433 | 0.317843 | 0.445159 | -6.54114 |



|           |          |          |          |          |          |          |
|-----------|----------|----------|----------|----------|----------|----------|
| LARP7     | -0.15243 | 5.179174 | -1.00144 | 0.317841 | 0.445159 | -6.56505 |
| PI4KAP1   | -0.27237 | 3.637979 | -1.00123 | 0.317941 | 0.445251 | -6.35904 |
| BMP2      | -0.44011 | 4.376323 | -1.00114 | 0.317984 | 0.445268 | -6.50501 |
| C14orf149 | 0.285184 | 2.3163   | 1.000817 | 0.31814  | 0.445401 | -5.97855 |
| RFT1      | -0.15387 | 4.235245 | -1.00081 | 0.318143 | 0.445401 | -6.45229 |
| TRAF3IP3  | 0.418594 | 1.329976 | 1.000399 | 0.318342 | 0.445616 | -5.79158 |
| ECM2      | -0.31941 | 2.736651 | -1.00029 | 0.318393 | 0.445616 | -6.16829 |
| USP9X     | -0.18204 | 7.873071 | -1.00031 | 0.318385 | 0.445616 | -6.60137 |
| PLEKHM2   | -0.17419 | 6.678522 | -1.00022 | 0.318428 | 0.44562  | -6.62648 |
| PPP2R2D   | -0.1257  | 4.621816 | -0.99978 | 0.318641 | 0.445874 | -6.50371 |
| DCLRE1A   | 0.190421 | 4.179604 | 0.999633 | 0.318712 | 0.445929 | -6.38699 |
| BIN3      | -0.18321 | 3.995943 | -0.99954 | 0.318755 | 0.445945 | -6.41585 |
| ARHGAP22  | 0.399256 | 0.98387  | 0.999243 | 0.3189   | 0.446102 | -5.74387 |
| NRP2      | -0.39624 | 5.530848 | -0.9981  | 0.319451 | 0.446828 | -6.60922 |
| ZNF749    | 0.207268 | 2.516089 | 0.997918 | 0.31954  | 0.446864 | -6.02918 |
| ZNF74     | 0.237347 | 4.068515 | 0.997967 | 0.319517 | 0.446864 | -6.35826 |
| ZUFSP     | 0.15642  | 3.193559 | 0.99767  | 0.319661 | 0.446905 | -6.17784 |
| UBE2E1    | 0.152885 | 5.29688  | 0.99766  | 0.319666 | 0.446905 | -6.55423 |
| RNF5      | -0.19259 | 5.506225 | -0.99772 | 0.319635 | 0.446905 | -6.5975  |
| METT10D   | -0.13803 | 5.212305 | -0.99731 | 0.319834 | 0.447094 | -6.57108 |
| NEURL1B   | 0.330345 | 5.632511 | 0.997249 | 0.319865 | 0.447094 | -6.57152 |
| ZCCHC4    | -0.15716 | 2.586545 | -0.99694 | 0.320014 | 0.447213 | -6.1078  |
| ANP32A    | 0.157853 | 5.927288 | 0.996874 | 0.320046 | 0.447213 | -6.60504 |
| SGK269    | -0.2396  | 6.016708 | -0.997   | 0.319984 | 0.447213 | -6.62367 |
| CFI       | 0.537177 | 3.786143 | 0.996624 | 0.320167 | 0.447301 | -6.23525 |
| MARVELD1  | 0.353364 | 5.708677 | 0.996611 | 0.320173 | 0.447301 | -6.5771  |
| LILRB3    | 0.468025 | 0.744509 | 0.996338 | 0.320306 | 0.447307 | -5.69969 |
| RAD52     | -0.20148 | 2.624715 | -0.99641 | 0.320271 | 0.447307 | -6.12294 |
| GLRX      | -0.32192 | 4.02046  | -0.99651 | 0.320222 | 0.447307 | -6.44557 |
| NIT1      | 0.152424 | 4.495378 | 0.996401 | 0.320275 | 0.447307 | -6.45476 |
| C11orf75  | -0.30074 | 3.0938   | -0.99619 | 0.320377 | 0.447314 | -6.24282 |
| TP53I11   | 0.361258 | 6.548607 | 0.996129 | 0.320407 | 0.447314 | -6.62425 |
| PPRC1     | 0.151217 | 6.744217 | 0.996156 | 0.320394 | 0.447314 | -6.63083 |
| ATP10B    | 1.138468 | 4.417128 | 0.995141 | 0.320886 | 0.447938 | -6.24963 |
| SLC46A3   | -0.39637 | 4.075209 | -0.99501 | 0.320951 | 0.447984 | -6.46592 |
| BBX       | -0.2084  | 6.297006 | -0.9946  | 0.321148 | 0.448215 | -6.63124 |
| CCNG2     | -0.26432 | 5.334219 | -0.99445 | 0.32122  | 0.448271 | -6.59337 |
| RILPL2    | 0.210228 | 3.564773 | 0.994371 | 0.321259 | 0.448281 | -6.25546 |
| CTDP1     | -0.14296 | 4.882995 | -0.99364 | 0.321613 | 0.44873  | -6.54207 |
| GALNT1    | 0.227117 | 6.921664 | 0.992978 | 0.321936 | 0.449136 | -6.63411 |
| FAM102B   | 0.308005 | 5.256547 | 0.992703 | 0.32207  | 0.449277 | -6.53943 |
| NDUFB3    | 0.163969 | 5.033538 | 0.992582 | 0.322129 | 0.449314 | -6.52911 |
| HTR7P1    | 0.300601 | 1.534928 | 0.992284 | 0.322274 | 0.449427 | -5.85111 |
| CHCHD7    | -0.20265 | 4.283664 | -0.99231 | 0.322261 | 0.449427 | -6.47485 |
| TGM1      | 1.578797 | 3.676441 | 0.992213 | 0.322308 | 0.44943  | -6.02264 |
| ZNF775    | -0.24889 | 2.116317 | -0.99165 | 0.32258  | 0.449752 | -6.03557 |
| ARHGEF2   | -0.19494 | 6.084457 | -0.99161 | 0.322603 | 0.449752 | -6.62976 |
| LOC284023 | 0.253295 | 2.293169 | 0.991503 | 0.322654 | 0.449777 | -5.98945 |
| DIS3      | 0.156337 | 6.121431 | 0.991354 | 0.322726 | 0.449834 | -6.62041 |
| CUX1      | -0.18708 | 7.337163 | -0.99108 | 0.32286  | 0.449975 | -6.62412 |
| GJA4      | 0.36572  | 2.444887 | 0.990937 | 0.322929 | 0.450027 | -5.99898 |
| OSGEPL1   | 0.172973 | 2.520723 | 0.990701 | 0.323044 | 0.450097 | -6.04183 |
| ARF6      | 0.176566 | 7.421    | 0.990739 | 0.323026 | 0.450097 | -6.62935 |
| E2F5      | 0.47302  | 2.412696 | 0.990528 | 0.323129 | 0.450125 | -5.97461 |
| ARHGAP33  | 0.311753 | 3.440331 | 0.99055  | 0.323118 | 0.450125 | -6.20949 |
| SFT2D1    | 0.183957 | 4.421921 | 0.990396 | 0.323193 | 0.45017  | -6.44272 |
| ARFIP1    | -0.14646 | 5.389271 | -0.99026 | 0.323259 | 0.450216 | -6.59339 |
| KDM6B     | -0.17801 | 6.516528 | -0.9899  | 0.323435 | 0.450418 | -6.63725 |

|              |          |          |          |          |          |          |
|--------------|----------|----------|----------|----------|----------|----------|
| C9orf80      | 0.136559 | 3.580973 | 0.989753 | 0.323506 | 0.450471 | -6.27586 |
| PLA2R1       | 0.408138 | 3.770542 | 0.989656 | 0.323553 | 0.450492 | -6.26952 |
| RPS15        | 0.228242 | 7.598549 | 0.989411 | 0.323673 | 0.450614 | -6.62801 |
| STARD3       | 0.372757 | 5.335616 | 0.98889  | 0.323927 | 0.450878 | -6.54535 |
| AFG3L2       | -0.18004 | 6.014689 | -0.98893 | 0.323908 | 0.450878 | -6.63007 |
| CYP4F3       | 1.134328 | 2.90108  | 0.988383 | 0.324175 | 0.451125 | -5.96062 |
| ADM          | 0.486262 | 4.700678 | 0.988329 | 0.324201 | 0.451125 | -6.44902 |
| TMED5        | -0.17253 | 6.301069 | -0.98841 | 0.324162 | 0.451125 | -6.63697 |
| PIH1D1       | 0.153621 | 4.924682 | 0.988134 | 0.324296 | 0.451212 | -6.52147 |
| TCIRG1       | 0.248746 | 6.161645 | 0.987313 | 0.324698 | 0.451725 | -6.62236 |
| SPDYA        | 0.263715 | 0.13999  | 0.986436 | 0.325127 | 0.452277 | -5.64906 |
| KIAA0895L    | -0.17533 | 3.642919 | -0.98618 | 0.325251 | 0.452405 | -6.35715 |
| EMB          | 0.533497 | 4.919393 | 0.985515 | 0.325577 | 0.452814 | -6.47824 |
| TMEM33       | 0.160695 | 6.715938 | 0.984979 | 0.32584  | 0.453134 | -6.64158 |
| KLK1         | 0.801663 | 0.700659 | 0.984729 | 0.325962 | 0.453259 | -5.65801 |
| AMICA1       | -0.42671 | 1.87388  | -0.98445 | 0.326101 | 0.453407 | -6.02806 |
| HSPA6        | 0.698275 | 3.336139 | 0.983932 | 0.326353 | 0.453712 | -6.12217 |
| KIAA0528     | -0.17867 | 5.764083 | -0.98353 | 0.326548 | 0.453893 | -6.62537 |
| WDR82        | -0.1189  | 6.571315 | -0.98357 | 0.326528 | 0.453893 | -6.64346 |
| SRRM5        | 0.256564 | 0.443471 | 0.983301 | 0.326663 | 0.453986 | -5.69591 |
| C14orf101    | 0.177664 | 4.41746  | 0.983265 | 0.32668  | 0.453986 | -6.45044 |
| CXCR3        | 0.561705 | 0.734964 | 0.983146 | 0.326739 | 0.454022 | -5.69909 |
| RNF121       | 0.214573 | 3.850142 | 0.982613 | 0.327001 | 0.454341 | -6.32878 |
| PIN1         | -0.14638 | 4.907992 | -0.98251 | 0.327052 | 0.454368 | -6.55601 |
| MICALCL      | 0.472624 | 1.694169 | 0.982357 | 0.327126 | 0.454425 | -5.85746 |
| MAPKAPK2     | -0.13396 | 7.087487 | -0.98216 | 0.327224 | 0.454515 | -6.63886 |
| PTCD2        | -0.15642 | 2.475577 | -0.98201 | 0.327299 | 0.454529 | -6.09986 |
| CITED4       | 0.38853  | 4.7235   | 0.982062 | 0.327271 | 0.454529 | -6.47181 |
| SAMD4B       | 0.135349 | 7.433573 | 0.980787 | 0.327898 | 0.455316 | -6.63814 |
| MUC17        | 2.64343  | 1.850717 | 0.980611 | 0.327985 | 0.455391 | -5.60141 |
| NDUFB4       | 0.17793  | 6.402786 | 0.980455 | 0.328061 | 0.455452 | -6.6403  |
| KIAA1712     | -0.18567 | 3.805651 | -0.98037 | 0.328102 | 0.455464 | -6.39937 |
| RPL18A       | 0.260288 | 4.544195 | 0.980016 | 0.328277 | 0.455662 | -6.46379 |
| BACE2        | -0.32329 | 6.511703 | -0.9798  | 0.328383 | 0.455764 | -6.64672 |
| BIRC3        | -0.53322 | 4.867242 | -0.97918 | 0.328689 | 0.456142 | -6.58812 |
| CPT1A        | -0.32433 | 7.076172 | -0.97911 | 0.328723 | 0.456144 | -6.63874 |
| MAP3K6       | -0.29343 | 5.680636 | -0.97898 | 0.328788 | 0.456189 | -6.63078 |
| TDRD7        | 0.213998 | 4.776297 | 0.978472 | 0.329038 | 0.456491 | -6.50526 |
| NDUFS3       | -0.15866 | 5.57284  | -0.97828 | 0.329135 | 0.45658  | -6.61891 |
| LOC100128842 | -0.27594 | 1.218104 | -0.97787 | 0.329337 | 0.456679 | -5.89441 |
| KLHL8        | -0.16593 | 4.154581 | -0.97787 | 0.329333 | 0.456679 | -6.46434 |
| POLR3E       | -0.12958 | 5.212042 | -0.97792 | 0.329313 | 0.456679 | -6.58915 |
| ARF5         | 0.188477 | 6.109821 | 0.977929 | 0.329306 | 0.456679 | -6.63176 |
| HMOX1        | 0.359746 | 4.2889   | 0.977557 | 0.32949  | 0.456846 | -6.40471 |
| SEPHS2       | 0.240016 | 6.540887 | 0.977084 | 0.329723 | 0.457124 | -6.64553 |
| ZNF575       | -0.19167 | 1.379021 | -0.97661 | 0.329957 | 0.457357 | -5.91161 |
| SRF          | -0.1891  | 6.587747 | -0.97663 | 0.329948 | 0.457357 | -6.65011 |
| SLC4A8       | -0.49899 | 0.894985 | -0.97626 | 0.330131 | 0.457553 | -5.87519 |
| CDS1         | 0.304544 | 5.481882 | 0.976172 | 0.330174 | 0.457567 | -6.57926 |
| EMID1        | -0.54658 | 1.645098 | -0.97587 | 0.330324 | 0.457729 | -6.00798 |
| AVIL         | -0.37769 | 0.971087 | -0.9754  | 0.330556 | 0.457914 | -5.87259 |
| MED18        | -0.16959 | 3.345988 | -0.97546 | 0.330524 | 0.457914 | -6.29798 |
| TNFRSF10D    | -0.41734 | 3.135967 | -0.97546 | 0.330525 | 0.457914 | -6.29972 |
| CCS          | -0.15063 | 3.977605 | -0.97514 | 0.330682 | 0.458044 | -6.43196 |
| ARAP2        | 0.29905  | 5.288057 | 0.97503  | 0.330738 | 0.458076 | -6.56142 |
| HTRA1        | 0.321366 | 5.975512 | 0.974875 | 0.330815 | 0.458092 | -6.62068 |
| FLOT1        | 0.158846 | 6.744687 | 0.974896 | 0.330805 | 0.458092 | -6.65161 |
| ZNF623       | 0.165958 | 4.934836 | 0.97477  | 0.330867 | 0.458119 | -6.5346  |

|           |          |          |          |          |          |          |
|-----------|----------|----------|----------|----------|----------|----------|
| NUFIP1    | 0.186532 | 3.219071 | 0.973631 | 0.331431 | 0.458855 | -6.20148 |
| FAM84B    | -0.33822 | 6.190311 | -0.97341 | 0.33154  | 0.458959 | -6.65195 |
| ZNF416    | -0.21662 | 2.246938 | -0.97293 | 0.331777 | 0.459197 | -6.07412 |
| RHOD      | 0.444746 | 5.020699 | 0.972941 | 0.331773 | 0.459197 | -6.51617 |
| C7orf10   | 0.652299 | 0.347025 | 0.972292 | 0.332095 | 0.459591 | -5.6461  |
| C1orf104  | 0.270934 | 2.105848 | 0.972119 | 0.332181 | 0.459664 | -5.96946 |
| NAA30     | -0.13635 | 5.032159 | -0.97204 | 0.332221 | 0.459674 | -6.57831 |
| ZNF195    | 0.237917 | 4.273601 | 0.971736 | 0.332371 | 0.459836 | -6.42439 |
| PEX13     | 0.140584 | 5.600123 | 0.971118 | 0.332678 | 0.460215 | -6.60856 |
| LAT       | 0.358808 | 1.874211 | 0.970888 | 0.332792 | 0.460308 | -5.91925 |
| ZNF521    | -0.36462 | 2.695335 | -0.97085 | 0.332811 | 0.460308 | -6.19594 |
| ATP5G2    | -0.17307 | 6.977101 | -0.97036 | 0.333052 | 0.460596 | -6.65166 |
| GPX8      | 0.353277 | 4.123651 | 0.970098 | 0.333184 | 0.46068  | -6.37445 |
| SUPV3L1   | 0.143372 | 4.788054 | 0.970149 | 0.333159 | 0.46068  | -6.52308 |
| ZMYM4     | -0.12114 | 6.13174  | -0.97004 | 0.333211 | 0.46068  | -6.65032 |
| CSNK2A1P  | 0.168249 | 5.338085 | 0.969802 | 0.333332 | 0.4608   | -6.58368 |
| GOLM1     | 0.494661 | 7.05182  | 0.969328 | 0.333568 | 0.461081 | -6.65667 |
| REPIN1    | -0.30151 | 6.869262 | -0.96921 | 0.333627 | 0.461118 | -6.65264 |
| NELF      | 0.231568 | 6.311043 | 0.969096 | 0.333683 | 0.461149 | -6.64691 |
| AP4M1     | 0.194867 | 3.696574 | 0.968632 | 0.333914 | 0.461407 | -6.31076 |
| RBM25     | -0.13813 | 7.375898 | -0.96859 | 0.333935 | 0.461407 | -6.64611 |
| DCAF17    | 0.141964 | 4.988166 | 0.968225 | 0.334117 | 0.461611 | -6.54995 |
| PRKAR1B   | 0.265677 | 3.637613 | 0.96603  | 0.335211 | 0.463078 | -6.28723 |
| GAL       | 1.158894 | 0.326223 | 0.965652 | 0.3354   | 0.463279 | -5.60686 |
| TAX1BP1   | -0.1934  | 7.199364 | -0.96561 | 0.335423 | 0.463279 | -6.65167 |
| DUSP28    | -0.15466 | 2.160462 | -0.96519 | 0.335629 | 0.463487 | -6.05362 |
| LOC388692 | -0.28301 | 4.179038 | -0.96517 | 0.33564  | 0.463487 | -6.49723 |
| KLK5      | 1.49362  | 0.499191 | 0.964862 | 0.335794 | 0.463609 | -5.6087  |
| DPF2      | 0.169994 | 5.800909 | 0.964927 | 0.335762 | 0.463609 | -6.62772 |
| TSNAX     | 0.134001 | 5.545263 | 0.964715 | 0.335868 | 0.463664 | -6.61077 |
| CFDP1     | 0.173555 | 4.499267 | 0.964556 | 0.335947 | 0.463728 | -6.48392 |
| GPRIN2    | -0.56016 | 2.946506 | -0.96353 | 0.33646  | 0.464325 | -6.29491 |
| SEC22A    | 0.14827  | 3.999729 | 0.963539 | 0.336456 | 0.464325 | -6.39359 |
| RTCD1     | -0.15647 | 4.921193 | -0.96349 | 0.336479 | 0.464325 | -6.57632 |
| ITM2C     | -0.32005 | 6.043541 | -0.96317 | 0.336638 | 0.464498 | -6.65904 |
| C19orf70  | -0.18989 | 4.303516 | -0.96266 | 0.336895 | 0.464807 | -6.50469 |
| ETAA1     | 0.17367  | 4.266091 | 0.96156  | 0.337447 | 0.465522 | -6.44522 |
| GZF1      | -0.17136 | 4.493176 | -0.96128 | 0.337585 | 0.465621 | -6.53003 |
| IPO11     | -0.13045 | 4.745919 | -0.96131 | 0.33757  | 0.465621 | -6.55666 |
| LMAN2L    | 0.165881 | 4.474099 | 0.960765 | 0.337846 | 0.465934 | -6.48428 |
| FAM104B   | -0.18994 | 3.048022 | -0.96038 | 0.338041 | 0.466013 | -6.25166 |
| RBM15     | 0.149216 | 4.401596 | 0.960457 | 0.338    | 0.466013 | -6.47515 |
| TRIB2     | -0.33065 | 5.327447 | -0.96043 | 0.338012 | 0.466013 | -6.62971 |
| SERTAD2   | 0.265233 | 5.98204  | 0.960368 | 0.338045 | 0.466013 | -6.63822 |
| VPS4B     | -0.20947 | 6.232059 | -0.96032 | 0.338069 | 0.466013 | -6.66357 |
| TRPM7     | -0.15133 | 6.137913 | -0.96013 | 0.338162 | 0.466095 | -6.66066 |
| BCAS2     | 0.169418 | 4.714711 | 0.95989  | 0.338285 | 0.466218 | -6.52034 |
| LSM10     | 0.147799 | 3.990518 | 0.959459 | 0.338501 | 0.46647  | -6.39605 |
| PTK6      | 0.546255 | 4.82556  | 0.959321 | 0.338571 | 0.46652  | -6.48393 |
| APOBEC3C  | 0.359691 | 4.177754 | 0.959163 | 0.33865  | 0.466524 | -6.39647 |
| MED4      | 0.151905 | 5.204241 | 0.959114 | 0.338674 | 0.466524 | -6.58186 |
| USP6NL    | 0.214093 | 5.489672 | 0.959236 | 0.338613 | 0.466524 | -6.60472 |
| TGFB2     | 0.480232 | 3.114055 | 0.958813 | 0.338826 | 0.466687 | -6.13924 |
| PIGR      | -1.46627 | 5.116978 | -0.95861 | 0.33893  | 0.466784 | -6.66138 |
| DEFB1     | 0.798308 | 2.500762 | 0.9579   | 0.339285 | 0.467227 | -5.96956 |
| QKI       | -0.29352 | 6.379631 | -0.95773 | 0.339368 | 0.467296 | -6.66824 |
| ZW10      | 0.138414 | 4.486292 | 0.957486 | 0.339493 | 0.467422 | -6.49333 |
| NEIL2     | 0.328067 | 3.623538 | 0.957339 | 0.339567 | 0.467478 | -6.27881 |

|           |          |          |          |          |          |          |
|-----------|----------|----------|----------|----------|----------|----------|
| EIF3G     | -0.15285 | 6.475723 | -0.95723 | 0.339622 | 0.467507 | -6.66869 |
| TROVE2    | -0.1316  | 5.806409 | -0.95703 | 0.339723 | 0.4676   | -6.6511  |
| EPC2      | -0.13186 | 4.72522  | -0.9567  | 0.33989  | 0.467784 | -6.55899 |
| GTPBP1    | -0.13919 | 6.537047 | -0.95619 | 0.340147 | 0.468092 | -6.66983 |
| LGALS4    | -1.24085 | 3.180331 | -0.95592 | 0.340284 | 0.468234 | -6.46501 |
| TRAPPC2L  | -0.18685 | 4.335105 | -0.9558  | 0.340343 | 0.468269 | -6.5152  |
| 5-Mar     | -0.12971 | 5.432811 | -0.9551  | 0.340696 | 0.468708 | -6.62973 |
| RFTN2     | -0.2685  | 1.417478 | -0.95465 | 0.340924 | 0.468927 | -5.9514  |
| HECW2     | 0.338635 | 3.304741 | 0.954584 | 0.340955 | 0.468927 | -6.20914 |
| POLR3A    | 0.157381 | 4.913809 | 0.954682 | 0.340906 | 0.468927 | -6.55218 |
| KHDC1     | 0.396435 | 0.484275 | 0.954353 | 0.341072 | 0.469041 | -5.7111  |
| TCF7L1    | -0.36059 | 3.975208 | -0.95428 | 0.341107 | 0.469043 | -6.48738 |
| YWHAH     | 0.15354  | 7.26912  | 0.954126 | 0.341187 | 0.469107 | -6.66714 |
| HEATR3    | 0.14086  | 3.993017 | 0.953823 | 0.341339 | 0.46927  | -6.40281 |
| IER3      | 0.331807 | 6.757828 | 0.953597 | 0.341454 | 0.469381 | -6.67044 |
| PSMC5     | 0.141951 | 6.625487 | 0.952942 | 0.341785 | 0.46979  | -6.67171 |
| TSPAN3    | 0.317904 | 7.71664  | 0.952752 | 0.341881 | 0.469876 | -6.66252 |
| USP45     | -0.17005 | 3.801711 | -0.95246 | 0.342027 | 0.47003  | -6.42177 |
| ZNF696    | 0.177807 | 3.396508 | 0.952317 | 0.342101 | 0.470086 | -6.26255 |
| C2orf16   | -0.27168 | 1.213942 | -0.95208 | 0.34222  | 0.470203 | -5.91914 |
| LRRCC1    | 0.243737 | 4.598127 | 0.951868 | 0.342328 | 0.470306 | -6.50105 |
| HTATSF1   | 0.128008 | 6.166594 | 0.951777 | 0.342374 | 0.470322 | -6.6616  |
| ELOVL6    | -0.3278  | 4.575232 | -0.95158 | 0.342476 | 0.470416 | -6.56577 |
| P2RX4     | 0.268734 | 3.902658 | 0.951303 | 0.342614 | 0.470559 | -6.35686 |
| RUFY1     | -0.15308 | 5.197052 | -0.95123 | 0.342649 | 0.470561 | -6.61549 |
| TERF2     | -0.11368 | 4.993496 | -0.95114 | 0.342694 | 0.470577 | -6.59217 |
| IDE       | -0.17851 | 5.673392 | -0.95104 | 0.342749 | 0.470607 | -6.65204 |
| ST8SIA4   | 0.357906 | 3.070919 | 0.950957 | 0.342789 | 0.470615 | -6.16007 |
| SCML1     | 0.338459 | 4.099473 | 0.950814 | 0.342861 | 0.470668 | -6.38789 |
| GNAI2     | 0.165928 | 8.003235 | 0.950643 | 0.342948 | 0.47074  | -6.65462 |
| FRYL      | -0.18506 | 6.47324  | -0.95056 | 0.342988 | 0.47075  | -6.67509 |
| C2orf76   | -0.24057 | 1.337348 | -0.95034 | 0.343102 | 0.47086  | -5.9378  |
| C17orf81  | 0.172589 | 4.671473 | 0.950159 | 0.343193 | 0.470938 | -6.52333 |
| PHF23     | 0.148503 | 4.779952 | 0.949859 | 0.343345 | 0.471101 | -6.54136 |
| CNNM1     | 0.740886 | 2.339703 | 0.948681 | 0.343943 | 0.471874 | -5.96217 |
| WNK1      | -0.22293 | 8.572082 | -0.94801 | 0.344283 | 0.472295 | -6.62716 |
| MALT1     | 0.23076  | 5.415464 | 0.947615 | 0.344484 | 0.472524 | -6.60732 |
| LOC729082 | -0.15003 | 5.017761 | -0.94719 | 0.3447   | 0.472774 | -6.60175 |
| PHOSPHO2  | -0.21263 | 1.106846 | -0.94676 | 0.344916 | 0.473024 | -5.8963  |
| RPS27     | 0.322029 | 3.549734 | 0.946557 | 0.345022 | 0.47307  | -6.27395 |
| ZNF805    | -0.14328 | 4.533993 | -0.94651 | 0.345045 | 0.47307  | -6.5461  |
| HERC4     | 0.140773 | 5.584236 | 0.946446 | 0.345078 | 0.47307  | -6.63072 |
| STRN4     | 0.115565 | 6.925683 | 0.946432 | 0.345085 | 0.47307  | -6.67854 |
| MANF      | 0.189022 | 5.27769  | 0.945866 | 0.345373 | 0.473372 | -6.59831 |
| ENTPD6    | 0.243535 | 6.399003 | 0.945872 | 0.34537  | 0.473372 | -6.6715  |
| PRDM15    | 0.124433 | 3.763991 | 0.94552  | 0.345549 | 0.473567 | -6.36394 |
| C17orf57  | -0.33692 | 1.227715 | -0.94535 | 0.345636 | 0.47364  | -5.93667 |
| MIAT      | 0.451053 | 2.739116 | 0.944455 | 0.346092 | 0.474217 | -6.08169 |
| ZNF320    | -0.40918 | 3.627738 | -0.94437 | 0.346133 | 0.474224 | -6.43789 |
| ASNSD1    | -0.10899 | 5.191229 | -0.94431 | 0.346165 | 0.474224 | -6.61772 |
| C1D       | 0.139753 | 3.899814 | 0.944241 | 0.3462   | 0.474227 | -6.39103 |
| FXN       | -0.16513 | 3.538923 | -0.94397 | 0.34634  | 0.474347 | -6.37113 |
| DIO2      | 0.45235  | 5.114995 | 0.94387  | 0.34639  | 0.474347 | -6.5555  |
| RPL27     | 0.178647 | 8.52779  | 0.943931 | 0.346359 | 0.474347 | -6.64506 |
| ABL2      | 0.187031 | 5.980843 | 0.943277 | 0.346692 | 0.474714 | -6.65834 |
| PRR15     | 0.908817 | 2.937189 | 0.943196 | 0.346733 | 0.474724 | -6.03551 |
| SERPINB13 | 2.02794  | 1.826166 | 0.942039 | 0.347324 | 0.475486 | -5.70722 |
| SPRR2A    | 2.196033 | 2.875568 | 0.941717 | 0.347488 | 0.475664 | -5.83732 |

|                |          |          |          |          |          |          |
|----------------|----------|----------|----------|----------|----------|----------|
| PPP5C          | 0.116529 | 5.752238 | 0.941525 | 0.347587 | 0.475716 | -6.64982 |
| UBA52          | 0.17914  | 8.251666 | 0.94151  | 0.347594 | 0.475716 | -6.65631 |
| SRPX2          | 0.46018  | 3.278759 | 0.94094  | 0.347886 | 0.476045 | -6.1973  |
| FAM98B         | 0.180586 | 3.321267 | 0.940907 | 0.347902 | 0.476045 | -6.25738 |
| RUNDC1         | -0.16206 | 5.035978 | -0.94078 | 0.347965 | 0.476084 | -6.61039 |
| ABI3           | 0.330775 | 2.855056 | 0.940518 | 0.348101 | 0.476224 | -6.12925 |
| BMPR2          | -0.17934 | 7.197897 | -0.94044 | 0.348141 | 0.476231 | -6.6758  |
| ACP6           | -0.30915 | 3.478127 | -0.93989 | 0.348423 | 0.47657  | -6.3911  |
| HYLS1          | 0.229039 | 2.393305 | 0.939676 | 0.348532 | 0.476673 | -6.05722 |
| RAB35          | 0.111201 | 5.837693 | 0.939229 | 0.348761 | 0.476939 | -6.65777 |
| CLPX           | -0.1261  | 5.328712 | -0.93915 | 0.3488   | 0.476941 | -6.63609 |
| BCLAF1         | -0.102   | 7.667726 | -0.93909 | 0.348831 | 0.476941 | -6.66804 |
| ZNF227         | -0.16941 | 3.542215 | -0.93882 | 0.34897  | 0.477039 | -6.37845 |
| MTSS1          | -0.52071 | 5.957424 | -0.93883 | 0.348965 | 0.477039 | -6.68366 |
| HSD17B11       | 0.395466 | 5.143554 | 0.938316 | 0.349229 | 0.477345 | -6.5693  |
| EIF1AY         | 1.084773 | 1.149543 | 0.938098 | 0.34934  | 0.477405 | -5.73725 |
| MARK4          | -0.17103 | 5.636032 | -0.93813 | 0.349323 | 0.477405 | -6.6618  |
| RPS4Y1         | 1.567875 | 3.577502 | 0.937901 | 0.349441 | 0.477449 | -6.06574 |
| ANO6           | -0.20263 | 6.687703 | -0.93794 | 0.349419 | 0.477449 | -6.68615 |
| FPGT           | -0.13636 | 4.156071 | -0.9373  | 0.34975  | 0.477795 | -6.49794 |
| AKAP8          | 0.113153 | 5.179174 | 0.937274 | 0.349763 | 0.477795 | -6.6034  |
| NEK3           | 0.373551 | 2.982152 | 0.937167 | 0.349817 | 0.477823 | -6.14539 |
| INTS3          | -0.12694 | 6.628853 | -0.93693 | 0.349941 | 0.477945 | -6.68795 |
| PTHLH          | 1.301856 | 3.50539  | 0.936636 | 0.35009  | 0.478102 | -6.09109 |
| STOML1         | -0.19326 | 3.096195 | -0.93573 | 0.350558 | 0.478694 | -6.28346 |
| MOXD1          | -0.48186 | 3.36959  | -0.93566 | 0.350593 | 0.478695 | -6.40931 |
| TMEM189-UBE2V1 | 1.022836 | 1.69134  | 0.935275 | 0.350789 | 0.478916 | -5.82456 |
| SNHG7          | 0.219884 | 4.336767 | 0.93511  | 0.350874 | 0.478985 | -6.47589 |
| HIC2           | -0.22371 | 3.56427  | -0.9347  | 0.351087 | 0.479228 | -6.39772 |
| THAP9          | -0.14923 | 2.541185 | -0.93456 | 0.351159 | 0.479281 | -6.15582 |
| EAPP           | 0.142925 | 4.754906 | 0.93411  | 0.351388 | 0.479536 | -6.55295 |
| MAT2B          | 0.125444 | 5.91618  | 0.934059 | 0.351415 | 0.479536 | -6.6664  |
| CYP27C1        | 0.858374 | 0.658121 | 0.933634 | 0.351633 | 0.479787 | -5.69678 |
| GMFG           | 0.324784 | 2.161864 | 0.933379 | 0.351764 | 0.479825 | -6.00846 |
| SNX7           | -0.1927  | 4.308402 | -0.93346 | 0.351724 | 0.479825 | -6.5335  |
| UBE2J2         | 0.142535 | 5.145718 | 0.933431 | 0.351737 | 0.479825 | -6.6006  |
| GTF2A1         | -0.17838 | 3.326038 | -0.93272 | 0.352105 | 0.480196 | -6.33681 |
| SAR1A          | -0.11787 | 6.081559 | -0.93278 | 0.352074 | 0.480196 | -6.68406 |
| MBD2           | 0.220207 | 6.229685 | 0.932648 | 0.352141 | 0.480198 | -6.67872 |
| RARS2          | -0.11912 | 4.64889  | -0.93219 | 0.352376 | 0.480425 | -6.57089 |
| PIK3CB         | 0.173372 | 5.981184 | 0.932248 | 0.352347 | 0.480425 | -6.66928 |
| NFAM1          | 0.379922 | 2.262225 | 0.931959 | 0.352496 | 0.480495 | -6.02045 |
| VPS8           | -0.15729 | 5.477872 | -0.93202 | 0.352466 | 0.480495 | -6.65642 |
| FAM118A        | -0.17622 | 4.114946 | -0.93139 | 0.35279  | 0.480849 | -6.50372 |
| SF1            | -0.08865 | 7.953839 | -0.93126 | 0.352855 | 0.48089  | -6.66771 |
| RAB30          | -0.25602 | 1.957067 | -0.93109 | 0.352946 | 0.480967 | -6.0651  |
| SDF2L1         | 0.214618 | 4.330508 | 0.930752 | 0.353119 | 0.481156 | -6.47792 |
| NBEAL2         | -0.29818 | 7.461374 | -0.93059 | 0.3532   | 0.48122  | -6.67669 |
| NUMB           | -0.13364 | 6.625618 | -0.93036 | 0.35332  | 0.481337 | -6.69403 |
| LMO7           | -0.37802 | 7.133392 | -0.92997 | 0.35352  | 0.481562 | -6.68314 |
| NRXN2          | -0.55766 | 0.559908 | -0.92971 | 0.353654 | 0.481651 | -5.87554 |
| LRFN1          | 0.53423  | 2.039504 | 0.929727 | 0.353648 | 0.481651 | -5.95976 |
| PIAS4          | 0.133996 | 4.062712 | 0.929246 | 0.353896 | 0.481865 | -6.44175 |
| NQO1           | -0.42111 | 7.388683 | -0.92921 | 0.353915 | 0.481865 | -6.677   |
| FUBP3          | 0.108468 | 6.194531 | 0.929275 | 0.353881 | 0.481865 | -6.68432 |
| HNRNPH3        | 0.104573 | 6.62174  | 0.928868 | 0.354092 | 0.482059 | -6.69456 |
| C7orf60        | 0.210223 | 3.935147 | 0.928796 | 0.354129 | 0.482063 | -6.40276 |
| STT3A          | 0.16806  | 6.857779 | 0.928496 | 0.354284 | 0.482227 | -6.69574 |

|           |          |          |          |          |          |          |
|-----------|----------|----------|----------|----------|----------|----------|
| SLC7A6    | 0.181205 | 5.794435 | 0.928344 | 0.354363 | 0.482287 | -6.66101 |
| COL8A2    | -0.46071 | 3.45697  | -0.92781 | 0.354641 | 0.482545 | -6.43286 |
| NCOR2     | -0.15302 | 8.666644 | -0.92778 | 0.354656 | 0.482545 | -6.6448  |
| NAP1L1    | 0.183659 | 7.721514 | 0.927783 | 0.354653 | 0.482545 | -6.68326 |
| OXER1     | -0.42789 | 0.360974 | -0.92767 | 0.35471  | 0.482571 | -5.8245  |
| PEX5      | 0.146412 | 5.214941 | 0.927586 | 0.354755 | 0.482585 | -6.61304 |
| C1orf93   | 0.304636 | 5.606124 | 0.927435 | 0.354833 | 0.482645 | -6.63713 |
| TMEM63C   | -0.73813 | 1.722364 | -0.92708 | 0.355018 | 0.4828   | -6.11119 |
| GPRIN3    | -0.46195 | 2.883463 | -0.92709 | 0.35501  | 0.4828   | -6.29338 |
| CTSS      | 0.424983 | 6.260268 | 0.927015 | 0.355051 | 0.4828   | -6.67657 |
| C14orf135 | 0.147707 | 5.068262 | 0.926909 | 0.355106 | 0.482828 | -6.5976  |
| HMGN3     | -0.2022  | 5.179005 | -0.92664 | 0.355243 | 0.482967 | -6.64062 |
| ATP13A2   | 0.166403 | 6.613276 | 0.92646  | 0.355338 | 0.48305  | -6.696   |
| CLCA2     | 2.605858 | 4.334778 | 0.926137 | 0.355506 | 0.48323  | -6.03788 |
| THAP7     | -0.15648 | 3.708089 | -0.92594 | 0.355609 | 0.483324 | -6.42421 |
| PELO      | -0.134   | 4.378497 | -0.92545 | 0.355863 | 0.483622 | -6.54389 |
| RABL2A    | 0.204532 | 2.822823 | 0.925091 | 0.356048 | 0.483779 | -6.15866 |
| NDUFA1    | -0.17845 | 5.719479 | -0.92512 | 0.356035 | 0.483779 | -6.67859 |
| SMG5      | 0.126179 | 7.149814 | 0.924836 | 0.35618  | 0.483912 | -6.69606 |
| GPNMB     | 0.655909 | 7.468248 | 0.924626 | 0.356289 | 0.484013 | -6.69799 |
| XKR9      | 0.691838 | 0.641343 | 0.924289 | 0.356464 | 0.484132 | -5.71958 |
| DHRS9     | -0.67342 | 1.811904 | -0.92419 | 0.356515 | 0.484132 | -6.10884 |
| ARHGAP4   | 0.394741 | 4.019943 | 0.924221 | 0.3565   | 0.484132 | -6.38816 |
| STAU2     | -0.16181 | 5.329945 | -0.92426 | 0.356481 | 0.484132 | -6.65269 |
| SNRNP70   | 0.093594 | 6.921571 | 0.924043 | 0.356592 | 0.484189 | -6.69926 |
| PLXNB1    | -0.18452 | 7.115078 | -0.92378 | 0.356726 | 0.484324 | -6.69279 |
| UBXN2B    | -0.16884 | 5.377625 | -0.92368 | 0.356782 | 0.484353 | -6.65748 |
| POLR1D    | -0.15436 | 6.51433  | -0.923   | 0.357134 | 0.484783 | -6.70081 |
| PCDHGC3   | -0.33879 | 6.209175 | -0.92284 | 0.357218 | 0.48485  | -6.69988 |
| FSTL4     | 1.013737 | 0.832723 | 0.92255  | 0.357368 | 0.485006 | -5.71444 |
| FES       | -0.28433 | 2.705211 | -0.92222 | 0.35754  | 0.485193 | -6.22882 |
| CEACAM7   | 1.482019 | 1.627712 | 0.922026 | 0.35764  | 0.485282 | -5.76081 |
| BMP4      | -0.4572  | 3.50152  | -0.92173 | 0.357796 | 0.485447 | -6.44    |
| EGFLAM    | 0.37959  | 2.025303 | 0.921168 | 0.358087 | 0.485794 | -5.98769 |
| CROCC     | -0.26343 | 4.689701 | -0.9202  | 0.358592 | 0.486432 | -6.60259 |
| APBA2     | 0.511117 | 2.531477 | 0.919932 | 0.358731 | 0.486573 | -6.06112 |
| PROC      | 0.612887 | 0.44497  | 0.919667 | 0.358869 | 0.486688 | -5.70431 |
| ATP5G1    | -0.19593 | 5.080829 | -0.91961 | 0.358898 | 0.486688 | -6.63715 |
| PRPF38B   | -0.159   | 6.213911 | -0.91957 | 0.35892  | 0.486688 | -6.70048 |
| BLNK      | -0.44885 | 3.318282 | -0.91946 | 0.358979 | 0.48672  | -6.39625 |
| MAPK8IP2  | 0.590965 | 2.720833 | 0.919268 | 0.359077 | 0.486806 | -6.07803 |
| ICAM3     | -0.27778 | 3.024306 | -0.91916 | 0.359135 | 0.486834 | -6.30016 |
| ATAD1     | -0.15541 | 5.741785 | -0.9191  | 0.359167 | 0.486834 | -6.68423 |
| SH3RF3    | -0.30298 | 3.460638 | -0.91889 | 0.359274 | 0.486932 | -6.40745 |
| LCMT2     | -0.19894 | 3.622723 | -0.91842 | 0.359519 | 0.487185 | -6.42176 |
| RAB18     | -0.1798  | 6.628357 | -0.9184  | 0.359531 | 0.487185 | -6.70478 |
| MLH3      | 0.193167 | 4.374388 | 0.918139 | 0.359666 | 0.487322 | -6.50282 |
| RRP1B     | 0.152212 | 6.110745 | 0.918064 | 0.359706 | 0.487327 | -6.68967 |
| WTAP      | 0.117655 | 6.178568 | 0.917724 | 0.359883 | 0.48752  | -6.69405 |
| SCRN2     | -0.18264 | 3.575842 | -0.91741 | 0.360047 | 0.487648 | -6.40758 |
| FKTN      | -0.15718 | 5.095801 | -0.91742 | 0.360041 | 0.487648 | -6.63724 |
| MPST      | -0.22297 | 5.860923 | -0.91717 | 0.360172 | 0.48777  | -6.69392 |
| SLC6A20   | 1.301588 | 1.451397 | 0.916677 | 0.360431 | 0.488026 | -5.7606  |
| B4GALT6   | -0.3235  | 3.01583  | -0.91668 | 0.360428 | 0.488026 | -6.313   |
| WAS       | 0.37324  | 2.553198 | 0.916504 | 0.360521 | 0.488053 | -6.08664 |
| 10-Sep    | -0.18072 | 6.630029 | -0.91652 | 0.360511 | 0.488053 | -6.70648 |
| RPL34     | -0.20894 | 7.411143 | -0.91633 | 0.360609 | 0.488126 | -6.69288 |
| FAM131A   | -0.22149 | 4.070595 | -0.91615 | 0.360708 | 0.488212 | -6.51679 |

|           |          |          |          |          |          |          |
|-----------|----------|----------|----------|----------|----------|----------|
| NCF1      | 0.419602 | 1.809999 | 0.915769 | 0.360905 | 0.488431 | -5.94923 |
| PLDN      | -0.1153  | 5.899503 | -0.91556 | 0.361016 | 0.488534 | -6.69314 |
| GLT8D1    | -0.13205 | 4.770031 | -0.91481 | 0.361405 | 0.488973 | -6.60262 |
| ELOVL5    | 0.420279 | 5.572857 | 0.914804 | 0.36141  | 0.488973 | -6.63689 |
| CALML3    | 2.572003 | 4.041462 | 0.913931 | 0.361868 | 0.489536 | -6.00183 |
| KIF3B     | 0.179824 | 6.636101 | 0.913877 | 0.361896 | 0.489536 | -6.70764 |
| SNF8      | 0.132801 | 5.072919 | 0.913633 | 0.362024 | 0.489662 | -6.61149 |
| TMEM167A  | -0.13261 | 6.438294 | -0.91356 | 0.362061 | 0.489664 | -6.70893 |
| C1orf156  | 0.152426 | 2.544502 | 0.913174 | 0.362265 | 0.489892 | -6.12241 |
| SLC26A11  | -0.2219  | 3.36848  | -0.9124  | 0.362671 | 0.490346 | -6.37519 |
| PARG      | 0.133452 | 4.603796 | 0.912449 | 0.362646 | 0.490346 | -6.55344 |
| ZNF431    | -0.24819 | 3.549896 | -0.91154 | 0.36312  | 0.490906 | -6.42201 |
| KCP       | 0.484308 | 1.238724 | 0.911094 | 0.363357 | 0.491132 | -5.85168 |
| NUDT16P1  | -0.48404 | 2.359666 | -0.91113 | 0.36334  | 0.491132 | -6.19821 |
| BAG2      | -0.32999 | 3.926028 | -0.91095 | 0.363434 | 0.49114  | -6.51387 |
| UBTF      | 0.107819 | 6.694653 | 0.911011 | 0.3634   | 0.49114  | -6.71151 |
| LOC401588 | 0.220966 | 1.436598 | 0.910415 | 0.363714 | 0.491471 | -5.92131 |
| S100A12   | 1.062145 | 1.068703 | 0.909661 | 0.364111 | 0.491938 | -5.75044 |
| MUC20     | 0.76386  | 4.853594 | 0.909624 | 0.36413  | 0.491938 | -6.50275 |
| ZDHHC14   | -0.2454  | 3.333061 | -0.90921 | 0.36435  | 0.492188 | -6.37207 |
| THSD1P1   | 0.219712 | 2.56951  | 0.908827 | 0.36455  | 0.49241  | -6.11881 |
| GALK2     | 0.176137 | 4.242726 | 0.908525 | 0.364709 | 0.492529 | -6.48769 |
| SNX6      | 0.140813 | 6.211647 | 0.908573 | 0.364683 | 0.492529 | -6.70281 |
| NLRP2     | -0.84729 | 2.553799 | -0.90811 | 0.364928 | 0.492682 | -6.31827 |
| SRPRB     | 0.155456 | 5.502953 | 0.908233 | 0.364862 | 0.492682 | -6.65767 |
| UNC45A    | -0.1383  | 6.355152 | -0.90817 | 0.364893 | 0.492682 | -6.71294 |
| SERPINA1  | 0.806112 | 6.119527 | 0.907698 | 0.365145 | 0.492905 | -6.65911 |
| C14orf166 | 0.136112 | 6.447173 | 0.907662 | 0.365163 | 0.492905 | -6.71065 |
| FADS1     | 0.489435 | 4.534227 | 0.907444 | 0.365278 | 0.493013 | -6.49503 |
| PIGZ      | -0.28737 | 2.954363 | -0.90736 | 0.365322 | 0.493024 | -6.29752 |
| ABCC1     | 0.330745 | 7.601996 | 0.907021 | 0.365501 | 0.493219 | -6.70743 |
| TTF1      | 0.127869 | 3.963903 | 0.906814 | 0.365611 | 0.493318 | -6.44193 |
| HS6ST2    | 1.057828 | 1.687481 | 0.906696 | 0.365673 | 0.493355 | -5.84847 |
| PHLDB3    | 0.30657  | 3.53645  | 0.906249 | 0.365909 | 0.493626 | -6.31332 |
| NLRP3     | -0.36564 | 0.541843 | -0.90592 | 0.36608  | 0.493761 | -5.86465 |
| CLINT1    | -0.19241 | 7.062041 | -0.90597 | 0.366054 | 0.493761 | -6.70986 |
| ATG16L1   | -0.15842 | 5.041687 | -0.90585 | 0.366118 | 0.493765 | -6.64252 |
| NFKBIZ    | 0.331723 | 5.712943 | 0.905683 | 0.366208 | 0.493838 | -6.66476 |
| LATS1     | -0.15539 | 5.244765 | -0.9054  | 0.366355 | 0.493989 | -6.66206 |
| CEP290    | -0.25701 | 4.502774 | -0.90528 | 0.366419 | 0.494028 | -6.5924  |
| SP1       | 0.106251 | 7.636156 | 0.904981 | 0.366578 | 0.494195 | -6.7044  |
| SLC25A29  | -0.21903 | 4.645464 | -0.90456 | 0.366803 | 0.494449 | -6.60706 |
| NSL1      | 0.140256 | 4.396353 | 0.904012 | 0.367091 | 0.49479  | -6.528   |
| SFXN2     | -0.30986 | 3.407929 | -0.90339 | 0.367421 | 0.495187 | -6.40478 |
| NKG7      | 0.55394  | 1.413399 | 0.903001 | 0.367626 | 0.495362 | -5.8765  |
| PIGB      | 0.133254 | 3.516708 | 0.902967 | 0.367644 | 0.495362 | -6.34273 |
| COPS2     | -0.12282 | 6.298978 | -0.90294 | 0.367657 | 0.495362 | -6.71655 |
| C6orf182  | 0.167657 | 2.471887 | 0.902863 | 0.367699 | 0.495371 | -6.11443 |
| ATP1A3    | -0.5465  | 0.458963 | -0.90247 | 0.367909 | 0.495558 | -5.88126 |
| RSL24D1   | -0.13495 | 6.02262  | -0.90252 | 0.367881 | 0.495558 | -6.71024 |
| SP140     | 0.515789 | 1.094198 | 0.902306 | 0.367994 | 0.495625 | -5.83166 |
| GANC      | -0.16547 | 4.295634 | -0.90209 | 0.36811  | 0.495733 | -6.55651 |
| PIK3CD    | 0.327794 | 4.299346 | 0.901104 | 0.368631 | 0.496387 | -6.48298 |
| COG4      | 0.130218 | 5.861249 | 0.901021 | 0.368675 | 0.496399 | -6.69308 |
| IGFBP7    | 0.278049 | 7.514342 | 0.900505 | 0.368949 | 0.496671 | -6.7141  |
| SIN3A     | 0.11898  | 6.618813 | 0.900517 | 0.368942 | 0.496671 | -6.72018 |
| ACVR1B    | -0.18418 | 6.17367  | -0.90013 | 0.369147 | 0.496891 | -6.71769 |
| PCOLCE    | 0.382957 | 5.202699 | 0.899978 | 0.369228 | 0.496952 | -6.61275 |

|              |          |          |          |          |          |          |
|--------------|----------|----------|----------|----------|----------|----------|
| CAV1         | -0.44185 | 6.601504 | -0.89963 | 0.369412 | 0.497152 | -6.71948 |
| ZNF428       | -0.17344 | 3.54728  | -0.89943 | 0.369521 | 0.497251 | -6.41722 |
| SGK3         | -0.19451 | 4.296749 | -0.89925 | 0.369614 | 0.497327 | -6.56269 |
| RNASE6       | 0.401077 | 2.43345  | 0.899017 | 0.369739 | 0.497447 | -6.0765  |
| TMEM147      | 0.178529 | 5.535755 | 0.89873  | 0.369891 | 0.497605 | -6.66759 |
| RPL32P3      | 0.215611 | 3.383755 | 0.898351 | 0.370093 | 0.497798 | -6.30048 |
| RGL1         | -0.25681 | 4.064134 | -0.89833 | 0.370107 | 0.497798 | -6.53795 |
| TRAPPC4      | -0.16261 | 4.5633   | -0.89813 | 0.370209 | 0.497888 | -6.59579 |
| C1orf198     | 0.159443 | 6.200263 | 0.897522 | 0.370534 | 0.498269 | -6.7117  |
| TINAGL1      | 0.32555  | 6.419726 | 0.897466 | 0.370564 | 0.498269 | -6.71407 |
| ZNF101       | 0.18277  | 2.748458 | 0.897257 | 0.370674 | 0.49837  | -6.1713  |
| VIL1         | 1.966268 | 1.382249 | 0.89593  | 0.371381 | 0.499273 | -5.6856  |
| SPCS2        | 0.202137 | 4.427052 | 0.895784 | 0.371459 | 0.499281 | -6.53015 |
| GRLF1        | -0.15801 | 7.272316 | -0.8958  | 0.371448 | 0.499281 | -6.71541 |
| ASRGL1       | -0.49403 | 2.16571  | -0.89562 | 0.371549 | 0.499354 | -6.17281 |
| HIVEP1       | 0.17883  | 5.859604 | 0.89552  | 0.3716   | 0.499374 | -6.6953  |
| RGS4         | -0.44752 | 1.704848 | -0.8952  | 0.37177  | 0.499417 | -6.08545 |
| ANAPC13      | -0.1549  | 5.906921 | -0.89519 | 0.371774 | 0.499417 | -6.71323 |
| CNDP2        | -0.19921 | 6.784913 | -0.89531 | 0.37171  | 0.499417 | -6.72389 |
| GSK3A        | 0.130023 | 6.706818 | 0.895375 | 0.371677 | 0.499417 | -6.72549 |
| USP3         | -0.14951 | 5.000082 | -0.89493 | 0.371917 | 0.49956  | -6.64721 |
| GSDMB        | 0.700569 | 3.711424 | 0.894821 | 0.371972 | 0.499586 | -6.27204 |
| CPVL         | 0.509858 | 3.635138 | 0.894266 | 0.372269 | 0.49984  | -6.30558 |
| PTPN13       | -0.61967 | 5.198683 | -0.89427 | 0.372268 | 0.49984  | -6.69935 |
| C19orf2      | 0.196608 | 6.300526 | 0.894301 | 0.37225  | 0.49984  | -6.71693 |
| PQLC3        | -0.18655 | 4.415481 | -0.8939  | 0.372463 | 0.500053 | -6.5825  |
| C4orf14      | -0.14045 | 5.24438  | -0.89349 | 0.372681 | 0.500298 | -6.67157 |
| MEGF6        | -0.36703 | 4.63113  | -0.8933  | 0.372782 | 0.500385 | -6.63126 |
| EHHADH       | -0.22648 | 4.470289 | -0.89302 | 0.372934 | 0.500542 | -6.5944  |
| LOC100129534 | -0.32196 | 0.354199 | -0.89247 | 0.373227 | 0.500887 | -5.84088 |
| PEX16        | 0.166384 | 4.059985 | 0.892239 | 0.373351 | 0.500997 | -6.46707 |
| ARMC8        | -0.13456 | 5.322501 | -0.89218 | 0.373381 | 0.500997 | -6.67913 |
| ZNF12        | 0.136469 | 5.543262 | 0.891928 | 0.373517 | 0.501132 | -6.67754 |
| KIF3A        | -0.15123 | 4.103802 | -0.89168 | 0.373649 | 0.501259 | -6.53357 |
| CD79A        | -0.64723 | 1.915296 | -0.89127 | 0.373868 | 0.50149  | -6.15674 |
| ADAT1        | 0.157228 | 4.104862 | 0.891227 | 0.373892 | 0.50149  | -6.47975 |
| C1orf54      | 0.277578 | 1.334866 | 0.891038 | 0.373994 | 0.501578 | -5.91366 |
| FPR1         | 0.428562 | 1.255498 | 0.890689 | 0.37418  | 0.50178  | -5.8811  |
| VPRBP        | -0.12971 | 5.780459 | -0.89045 | 0.374308 | 0.501903 | -6.71082 |
| ABCA1        | 0.315454 | 5.682408 | 0.890315 | 0.374381 | 0.501904 | -6.67751 |
| R3HDM2       | -0.11868 | 6.381387 | -0.89034 | 0.374368 | 0.501904 | -6.729   |
| PIGV         | -0.16359 | 4.072143 | -0.89024 | 0.374419 | 0.501907 | -6.52967 |
| PDE3B        | -0.33733 | 3.76127  | -0.89016 | 0.374463 | 0.501919 | -6.50312 |
| NDUFC2       | 0.182105 | 6.226677 | 0.889876 | 0.374615 | 0.502074 | -6.71867 |
| SLC37A2      | 0.55624  | 3.835188 | 0.889499 | 0.374817 | 0.502297 | -6.34894 |
| PLAA         | -0.19488 | 5.276434 | -0.8893  | 0.374923 | 0.50239  | -6.68225 |
| TMEM170A     | 0.164198 | 4.723738 | 0.889165 | 0.374997 | 0.502441 | -6.58676 |
| GLT25D2      | -0.60221 | 1.046317 | -0.8888  | 0.375195 | 0.502615 | -5.99559 |
| C1orf216     | 0.172792 | 3.475553 | 0.888788 | 0.375199 | 0.502615 | -6.34233 |
| PHF16        | -0.1814  | 4.181011 | -0.88854 | 0.375332 | 0.502745 | -6.55325 |
| NPEPPS       | -0.16137 | 6.947749 | -0.88803 | 0.375605 | 0.503062 | -6.72841 |
| PRKAA1       | -0.19004 | 6.916842 | -0.88795 | 0.375649 | 0.503073 | -6.72855 |
| CNIH2        | 0.524124 | 0.693338 | 0.887732 | 0.375765 | 0.503084 | -5.78347 |
| TMEM139      | -0.71843 | 0.782347 | -0.88778 | 0.375737 | 0.503084 | -5.966   |
| BCL10        | 0.190995 | 5.081575 | 0.887736 | 0.375763 | 0.503084 | -6.62959 |
| SRC          | 0.174905 | 7.15469  | 0.887615 | 0.375828 | 0.50312  | -6.73017 |
| URM1         | 0.164374 | 5.697009 | 0.88753  | 0.375874 | 0.503133 | -6.69154 |
| HS3ST3A1     | 0.61046  | 1.752578 | 0.887396 | 0.375946 | 0.503182 | -5.94041 |



|           |          |          |          |          |          |          |
|-----------|----------|----------|----------|----------|----------|----------|
| AHCTF1    | 0.141144 | 6.592354 | 0.887237 | 0.376031 | 0.503248 | -6.73141 |
| CDKN2A    | 1.020794 | 2.690813 | 0.887101 | 0.376104 | 0.503297 | -6.03083 |
| NOTCH2NL  | -0.1909  | 4.537035 | -0.88687 | 0.376225 | 0.503411 | -6.60638 |
| TOMM40L   | -0.16909 | 3.671451 | -0.88663 | 0.376354 | 0.503482 | -6.45519 |
| LRCH4     | 0.192006 | 5.510806 | 0.886575 | 0.376387 | 0.503482 | -6.67487 |
| EHBP1     | 0.191792 | 6.246328 | 0.88668  | 0.37633  | 0.503482 | -6.72196 |
| EPDR1     | -0.44339 | 2.443152 | -0.88623 | 0.376573 | 0.503655 | -6.2386  |
| ATF7IP2   | -0.36867 | 2.6802   | -0.8862  | 0.376587 | 0.503655 | -6.26601 |
| FAM123B   | -0.26406 | 3.93255  | -0.88592 | 0.376739 | 0.503808 | -6.52696 |
| ELAC2     | -0.12553 | 6.13217  | -0.88485 | 0.377312 | 0.504527 | -6.729   |
| PCDHGB2   | 0.557536 | 1.758532 | 0.884581 | 0.377459 | 0.504627 | -5.94716 |
| SUPT4H1   | 0.132861 | 5.653656 | 0.884614 | 0.377441 | 0.504627 | -6.69313 |
| RASSF9    | 0.574291 | 1.495375 | 0.884253 | 0.377635 | 0.504814 | -5.90526 |
| FLJ37453  | -0.20106 | 1.676133 | -0.88385 | 0.377854 | 0.50501  | -6.04947 |
| TRDMT1    | -0.21552 | 2.647415 | -0.88385 | 0.377853 | 0.50501  | -6.23584 |
| PCDHGA9   | -0.37642 | 1.245965 | -0.88377 | 0.377893 | 0.505011 | -6.00155 |
| MDFIC     | -0.30037 | 4.944033 | -0.88371 | 0.377927 | 0.505011 | -6.66611 |
| POF1B     | 0.78627  | 5.204898 | 0.883313 | 0.378142 | 0.505201 | -6.57885 |
| NAB1      | 0.17039  | 6.65294  | 0.883352 | 0.37812  | 0.505201 | -6.73525 |
| TMEM22    | 0.356747 | 1.808211 | 0.883212 | 0.378196 | 0.505225 | -5.98775 |
| BAT5      | 0.158358 | 5.458858 | 0.882875 | 0.378377 | 0.50542  | -6.67613 |
| ELL3      | 0.244797 | 3.199677 | 0.882636 | 0.378507 | 0.505544 | -6.26713 |
| GALT      | -0.16336 | 3.668895 | -0.88206 | 0.378817 | 0.50591  | -6.45496 |
| STC1      | -0.36908 | 5.113485 | -0.88192 | 0.378895 | 0.505966 | -6.68769 |
| ATOX1     | 0.188414 | 4.496761 | 0.881847 | 0.378932 | 0.505967 | -6.55725 |
| CHST15    | 0.323335 | 5.307108 | 0.88169  | 0.379016 | 0.506031 | -6.64739 |
| ITGB1     | 0.188567 | 9.188244 | 0.881328 | 0.379212 | 0.506244 | -6.67886 |
| BUD13     | 0.134475 | 4.102646 | 0.881197 | 0.379283 | 0.50628  | -6.49279 |
| NBL1      | -0.22041 | 6.8335   | -0.88114 | 0.379312 | 0.50628  | -6.73544 |
| RNASEH2C  | -0.15361 | 4.428445 | -0.88106 | 0.379358 | 0.506294 | -6.59245 |
| KIAA1383  | 0.481373 | 1.829756 | 0.8809   | 0.379443 | 0.506334 | -5.97368 |
| C19orf56  | -0.13561 | 5.840735 | -0.88087 | 0.379461 | 0.506334 | -6.72237 |
| STARD4    | -0.25749 | 3.363472 | -0.88061 | 0.379601 | 0.506472 | -6.40584 |
| HINT2     | -0.2437  | 3.449898 | -0.88036 | 0.379733 | 0.506552 | -6.4229  |
| SRCAP     | -0.1119  | 8.165315 | -0.88038 | 0.379723 | 0.506552 | -6.70618 |
| FEM1A     | -0.14761 | 5.532188 | -0.88019 | 0.379828 | 0.50663  | -6.70638 |
| CCL5      | 0.536292 | 3.778132 | 0.879987 | 0.379936 | 0.506727 | -6.34258 |
| GBP6      | 1.746121 | 3.486976 | 0.879813 | 0.38003  | 0.506804 | -6.06714 |
| COL6A2    | -0.37458 | 8.722739 | -0.87956 | 0.380165 | 0.506936 | -6.67924 |
| UBL5      | 0.143668 | 6.002663 | 0.879277 | 0.38032  | 0.507093 | -6.71953 |
| BCCIP     | 0.127638 | 5.608485 | 0.8789   | 0.380524 | 0.507317 | -6.69481 |
| CDC34     | 0.152036 | 4.893784 | 0.878575 | 0.3807   | 0.507503 | -6.61953 |
| LOC400657 | -0.19239 | 2.286282 | -0.87822 | 0.380895 | 0.507659 | -6.16262 |
| CEP76     | 0.189246 | 3.447035 | 0.87809  | 0.380962 | 0.507659 | -6.34013 |
| ZNHIT1    | 0.182963 | 5.656664 | 0.87813  | 0.38094  | 0.507659 | -6.69523 |
| PTPLAD1   | 0.179526 | 6.920094 | 0.878223 | 0.38089  | 0.507659 | -6.74077 |
| SFRP4     | 1.044832 | 2.868266 | 0.877752 | 0.381145 | 0.507806 | -6.07433 |
| NUDT19    | -0.17889 | 4.68711  | -0.87781 | 0.381111 | 0.507806 | -6.63092 |
| TMEM125   | -0.55566 | 2.674708 | -0.87757 | 0.381242 | 0.507887 | -6.30137 |
| CDH6      | 0.395915 | 2.384174 | 0.876378 | 0.38189  | 0.508701 | -6.08657 |
| ERLIN2    | -0.1975  | 6.300085 | -0.8761  | 0.38204  | 0.508852 | -6.74135 |
| PAIP2     | -0.12754 | 5.699058 | -0.87601 | 0.382091 | 0.508873 | -6.71926 |
| STAG3L3   | -0.21056 | 3.224112 | -0.87561 | 0.382305 | 0.509108 | -6.36894 |
| ESYT1     | 0.15781  | 6.909101 | 0.875394 | 0.382423 | 0.509218 | -6.74321 |
| IQCC      | 0.162843 | 1.881295 | 0.875168 | 0.382546 | 0.509283 | -6.03427 |
| STX10     | 0.142133 | 3.31404  | 0.875196 | 0.382531 | 0.509283 | -6.32035 |
| MANEAL    | 0.507052 | 2.962983 | 0.874705 | 0.382797 | 0.50957  | -6.17603 |
| YES1      | 0.178332 | 6.72382  | 0.874581 | 0.382865 | 0.509611 | -6.74355 |

|           |          |          |          |          |          |          |
|-----------|----------|----------|----------|----------|----------|----------|
| TMEM106A  | 0.296108 | 2.46027  | 0.874467 | 0.382926 | 0.509644 | -6.11556 |
| HHAT      | -0.31111 | 2.443957 | -0.87426 | 0.383039 | 0.509745 | -6.22117 |
| FAM22D    | -0.2369  | 1.921984 | -0.8741  | 0.383128 | 0.509816 | -6.10693 |
| GATAD2B   | 0.120283 | 6.081092 | 0.87384  | 0.383267 | 0.509952 | -6.72904 |
| TLR1      | 0.347701 | 1.852059 | 0.873293 | 0.383564 | 0.510299 | -6.00511 |
| FAM48A    | 0.129104 | 5.494939 | 0.872891 | 0.383783 | 0.510541 | -6.69053 |
| LASP1     | 0.191214 | 8.274018 | 0.87273  | 0.38387  | 0.510609 | -6.7179  |
| SLC25A35  | -0.21521 | 2.711822 | -0.87231 | 0.384101 | 0.510867 | -6.25792 |
| GRPEL2    | 0.210567 | 4.900065 | 0.872155 | 0.384183 | 0.510928 | -6.6197  |
| BTBD19    | -0.28659 | 0.328986 | -0.87202 | 0.384255 | 0.510974 | -5.84986 |
| AK1       | -0.22833 | 4.554781 | -0.8719  | 0.384325 | 0.511019 | -6.62444 |
| C11orf63  | -0.37504 | 1.292218 | -0.87174 | 0.38441  | 0.511084 | -6.02094 |
| MCC       | -0.42848 | 5.234422 | -0.87153 | 0.384525 | 0.511188 | -6.7108  |
| USP31     | 0.225508 | 5.65385  | 0.871275 | 0.384662 | 0.511322 | -6.6984  |
| ZNF587    | -0.22949 | 5.876745 | -0.87111 | 0.38475  | 0.51139  | -6.73569 |
| LYPLA2P1  | 0.195639 | 1.866117 | 0.870897 | 0.384868 | 0.511498 | -6.03044 |
| CLSTN2    | -0.42069 | 1.330001 | -0.87064 | 0.385008 | 0.511586 | -6.03402 |
| FSTL1     | -0.30507 | 7.595307 | -0.87067 | 0.384991 | 0.511586 | -6.72677 |
| PMS1      | 0.135842 | 4.029835 | 0.870514 | 0.385077 | 0.511629 | -6.48661 |
| EXOC2     | -0.12787 | 5.136643 | -0.87017 | 0.385266 | 0.511832 | -6.6811  |
| PHF20     | -0.13164 | 5.711078 | -0.87001 | 0.385352 | 0.511898 | -6.72522 |
| EML6      | -0.38317 | 1.53672  | -0.8697  | 0.38552  | 0.512072 | -6.0666  |
| ATRIP     | 0.135963 | 3.199273 | 0.869523 | 0.385617 | 0.512104 | -6.30184 |
| MGC70857  | 0.181229 | 5.190198 | 0.869522 | 0.385617 | 0.512104 | -6.65873 |
| RBBP5     | 0.131488 | 4.606749 | 0.869161 | 0.385814 | 0.512229 | -6.59225 |
| DDX19A    | 0.116717 | 5.019122 | 0.869247 | 0.385768 | 0.512229 | -6.6468  |
| CABIN1    | -0.13924 | 6.84898  | -0.86915 | 0.385821 | 0.512229 | -6.74672 |
| EID3      | -0.33857 | 0.171821 | -0.869   | 0.385901 | 0.512237 | -5.83618 |
| COPG      | 0.144051 | 7.983191 | 0.869005 | 0.3859   | 0.512237 | -6.72842 |
| RASA2     | 0.198251 | 3.502563 | 0.868881 | 0.385968 | 0.51224  | -6.35856 |
| APAF1     | 0.222121 | 4.940632 | 0.868798 | 0.386013 | 0.51224  | -6.62532 |
| DAB2      | 0.29977  | 5.122529 | 0.868839 | 0.38599  | 0.51224  | -6.63981 |
| GLB1L     | 0.311852 | 2.145915 | 0.868641 | 0.386098 | 0.512305 | -6.06518 |
| USP15     | -0.12192 | 5.957836 | -0.86852 | 0.386166 | 0.512345 | -6.73752 |
| FRG1B     | -0.2296  | 3.46313  | -0.86816 | 0.386362 | 0.51254  | -6.4353  |
| BAG5      | -0.11713 | 6.081731 | -0.86811 | 0.386386 | 0.51254  | -6.74197 |
| EIF4H     | -0.11868 | 7.631342 | -0.868   | 0.386446 | 0.512571 | -6.73244 |
| DNAJC15   | -0.31431 | 4.955415 | -0.86765 | 0.386639 | 0.512779 | -6.68117 |
| TESK2     | -0.19933 | 3.210008 | -0.86747 | 0.386739 | 0.512862 | -6.37345 |
| IVL       | 1.836162 | 1.93459  | 0.867309 | 0.386826 | 0.512928 | -5.81079 |
| TRMT11    | 0.165738 | 3.742253 | 0.867163 | 0.386905 | 0.512986 | -6.41948 |
| PCID2     | 0.160685 | 5.010695 | 0.866369 | 0.38734  | 0.513513 | -6.64337 |
| GMDS      | -0.39019 | 5.054632 | -0.86606 | 0.38751  | 0.513672 | -6.697   |
| RPS11     | 0.174864 | 9.0138   | 0.866015 | 0.387533 | 0.513672 | -6.69788 |
| C1GALT1C1 | 0.173472 | 4.771382 | 0.865755 | 0.387675 | 0.513811 | -6.61239 |
| ACY3      | 0.725191 | 0.981895 | 0.864979 | 0.3881   | 0.514326 | -5.81061 |
| KCMF1     | 0.119143 | 6.207823 | 0.86457  | 0.388324 | 0.514574 | -6.7422  |
| WDR55     | -0.14151 | 4.61205  | -0.86406 | 0.388606 | 0.514849 | -6.62932 |
| HUWE1     | -0.13568 | 9.000982 | -0.86406 | 0.388602 | 0.514849 | -6.69027 |
| PLEKHO1   | -0.2743  | 4.339838 | -0.86361 | 0.388853 | 0.515079 | -6.61254 |
| HIGD2A    | -0.16354 | 5.636894 | -0.86363 | 0.388842 | 0.515079 | -6.72812 |
| CD2BP2    | 0.114714 | 5.374228 | 0.863465 | 0.38893  | 0.515132 | -6.6889  |
| NFKBIA    | 0.244313 | 6.98455  | 0.862992 | 0.389189 | 0.515426 | -6.75389 |
| CD96      | 0.407151 | 2.292382 | 0.86267  | 0.389366 | 0.515444 | -6.08085 |
| VSIG10L   | 0.743379 | 3.566905 | 0.862632 | 0.389386 | 0.515444 | -6.27338 |
| LOC729678 | 0.219567 | 3.275005 | 0.862875 | 0.389253 | 0.515444 | -6.30788 |
| ALG10B    | -0.25405 | 3.814606 | -0.86274 | 0.389325 | 0.515444 | -6.52039 |
| ABHD3     | 0.238123 | 5.256851 | 0.862765 | 0.389314 | 0.515444 | -6.66552 |

|              |          |          |          |          |          |          |
|--------------|----------|----------|----------|----------|----------|----------|
| HECA         | -0.14174 | 6.257514 | -0.86234 | 0.389549 | 0.515609 | -6.75175 |
| USP9Y        | 1.098354 | 2.068424 | 0.86197  | 0.38975  | 0.515729 | -5.94411 |
| FUT2         | 0.46825  | 4.665462 | 0.862037 | 0.389713 | 0.515729 | -6.55527 |
| DST          | -0.32739 | 8.628154 | -0.86202 | 0.38972  | 0.515729 | -6.69922 |
| DALRD3       | -0.14722 | 4.268654 | -0.86141 | 0.390055 | 0.516018 | -6.58509 |
| LOC100132287 | 0.199709 | 5.210382 | 0.86137  | 0.390079 | 0.516018 | -6.66617 |
| RPS6KB1      | -0.12261 | 5.468106 | -0.86144 | 0.390039 | 0.516018 | -6.71637 |
| SEPN1        | -0.15473 | 7.683007 | -0.86067 | 0.390466 | 0.516482 | -6.7366  |
| SERTAD3      | -0.14791 | 3.892734 | -0.8606  | 0.390505 | 0.516484 | -6.52026 |
| EIF4E2       | -0.101   | 5.826851 | -0.86038 | 0.390623 | 0.51659  | -6.73804 |
| MBNL3        | -0.30576 | 3.279846 | -0.86029 | 0.39067  | 0.516605 | -6.41412 |
| AMOT         | -0.51382 | 3.450413 | -0.8601  | 0.390777 | 0.516697 | -6.49365 |
| C22orf40     | -0.13895 | 2.418888 | -0.86003 | 0.390817 | 0.516701 | -6.19481 |
| LRRC37A3     | 0.28381  | 1.813253 | 0.8599   | 0.390887 | 0.51671  | -6.01838 |
| C3AR1        | 0.36779  | 2.545554 | 0.859814 | 0.390935 | 0.51671  | -6.13484 |
| WDR61        | 0.112131 | 4.776659 | 0.859847 | 0.390916 | 0.51671  | -6.62557 |
| POLH         | 0.18875  | 4.761883 | 0.859153 | 0.391298 | 0.517141 | -6.61499 |
| PTPRO        | 0.491521 | 0.79351  | 0.858652 | 0.391574 | 0.517408 | -5.82784 |
| MED31        | 0.181565 | 2.319998 | 0.858697 | 0.391549 | 0.517408 | -6.12451 |
| CALML5       | 1.435887 | 0.774081 | 0.858338 | 0.391747 | 0.517408 | -5.7072  |
| FKBP14       | 0.222064 | 3.547039 | 0.858288 | 0.391774 | 0.517408 | -6.37265 |
| RPAP2        | 0.116241 | 3.695489 | 0.858223 | 0.39181  | 0.517408 | -6.42801 |
| LSMD1        | 0.184764 | 4.250707 | 0.858442 | 0.391689 | 0.517408 | -6.53395 |
| TNFRSF14     | -0.30196 | 5.103484 | -0.85852 | 0.391648 | 0.517408 | -6.70161 |
| HEATR5A      | -0.18187 | 5.365572 | -0.8582  | 0.391825 | 0.517408 | -6.71547 |
| C14orf147    | 0.206851 | 6.209874 | 0.858181 | 0.391833 | 0.517408 | -6.74466 |
| RNF144B      | -0.29702 | 4.426928 | -0.85764 | 0.392132 | 0.517754 | -6.62981 |
| NAIP         | -0.25526 | 1.22572  | -0.85734 | 0.392295 | 0.517906 | -6.00215 |
| LRRC37B      | 0.171514 | 2.808419 | 0.857173 | 0.392388 | 0.517906 | -6.22201 |
| HNRNPA0      | -0.09672 | 6.934748 | -0.85716 | 0.392396 | 0.517906 | -6.75633 |
| PNN          | 0.133537 | 6.758938 | 0.857188 | 0.39238  | 0.517906 | -6.75899 |
| MNS1         | 0.391395 | 1.97537  | 0.856904 | 0.392537 | 0.518044 | -6.03256 |
| ZSCAN21      | -0.16153 | 3.057791 | -0.85684 | 0.392574 | 0.518044 | -6.33922 |
| ZNF300       | -0.36488 | 1.885359 | -0.85657 | 0.392723 | 0.518154 | -6.1353  |
| CHAC1        | -0.37882 | 2.740578 | -0.85655 | 0.392732 | 0.518154 | -6.30161 |
| ZNF215       | 0.57075  | 0.712422 | 0.856305 | 0.392867 | 0.518283 | -5.80642 |
| AHSA2        | -0.18195 | 4.316883 | -0.85606 | 0.393001 | 0.518394 | -6.60114 |
| METRNL       | -0.25725 | 4.961612 | -0.85602 | 0.393025 | 0.518394 | -6.68705 |
| ISLR2        | -0.4426  | 0.540823 | -0.85561 | 0.393253 | 0.518646 | -5.91956 |
| PSEN1        | 0.118283 | 6.653756 | 0.854064 | 0.394105 | 0.51972  | -6.76108 |
| SNAP47       | 0.133727 | 4.659399 | 0.853993 | 0.394144 | 0.519723 | -6.61285 |
| NKX3-1       | 0.440903 | 2.165393 | 0.853917 | 0.394186 | 0.519728 | -6.06352 |
| SPRR2E       | 1.792115 | 1.57191  | 0.853432 | 0.394454 | 0.519801 | -5.77396 |
| TBX18        | 0.728987 | 0.896703 | 0.853631 | 0.394344 | 0.519801 | -5.81822 |
| ZNF485       | 0.225058 | 1.629695 | 0.853476 | 0.39443  | 0.519801 | -6.0004  |
| MORN2        | 0.185822 | 2.964777 | 0.853473 | 0.394431 | 0.519801 | -6.25302 |
| TFEB         | -0.20507 | 4.084192 | -0.85341 | 0.394464 | 0.519801 | -6.57158 |
| CHCHD3       | 0.158299 | 4.889533 | 0.853419 | 0.394461 | 0.519801 | -6.63988 |
| KIAA1467     | 0.34328  | 2.962387 | 0.853228 | 0.394567 | 0.519888 | -6.22761 |
| TBCC         | 0.180199 | 4.313276 | 0.853067 | 0.394656 | 0.519956 | -6.55081 |
| FBXO18       | -0.11672 | 6.229206 | -0.85265 | 0.394884 | 0.520207 | -6.75902 |
| PAPLN        | -0.31478 | 4.124555 | -0.85192 | 0.395292 | 0.520647 | -6.59589 |
| TWSG1        | -0.2307  | 6.217262 | -0.85194 | 0.395278 | 0.520647 | -6.76132 |
| CD209        | -0.39252 | 2.208206 | -0.85167 | 0.395431 | 0.52078  | -6.2058  |
| HS3ST1       | 0.450697 | 3.782388 | 0.851259 | 0.395657 | 0.52092  | -6.38255 |
| EXOSC7       | -0.12714 | 4.115884 | -0.85121 | 0.395685 | 0.52092  | -6.56639 |
| UBXN1        | -0.12718 | 5.647049 | -0.85139 | 0.395585 | 0.52092  | -6.73729 |
| NT5C2        | 0.161648 | 6.531107 | 0.851207 | 0.395686 | 0.52092  | -6.76124 |

|           |          |          |          |          |          |          |
|-----------|----------|----------|----------|----------|----------|----------|
| BMP7      | 0.700392 | 4.894351 | 0.851056 | 0.395769 | 0.520981 | -6.57329 |
| C9orf84   | 0.518142 | 0.084621 | 0.850928 | 0.39584  | 0.521025 | -5.72822 |
| PIP4K2C   | -0.13083 | 6.203451 | -0.85081 | 0.395907 | 0.521064 | -6.76026 |
| LOC642826 | -0.20214 | 2.405466 | -0.85033 | 0.396173 | 0.521365 | -6.21015 |
| EXOC6B    | -0.24156 | 4.221047 | -0.84991 | 0.396404 | 0.521619 | -6.60168 |
| KIN       | 0.147474 | 3.122338 | 0.849656 | 0.396546 | 0.521757 | -6.29772 |
| ZNF646    | -0.10983 | 5.247071 | -0.84957 | 0.396595 | 0.521772 | -6.70726 |
| PKP2      | 0.436378 | 5.447046 | 0.849473 | 0.396647 | 0.521792 | -6.67699 |
| KLHDC5    | -0.1884  | 5.624784 | -0.84926 | 0.396763 | 0.521895 | -6.74114 |
| DDX50     | 0.105115 | 4.889974 | 0.848783 | 0.39703  | 0.522148 | -6.65006 |
| RPS10     | 0.174794 | 7.416679 | 0.848836 | 0.397001 | 0.522148 | -6.75918 |
| BACH1     | 0.161062 | 6.074686 | 0.848485 | 0.397196 | 0.522268 | -6.74886 |
| RBM16     | -0.10121 | 5.95579  | -0.8485  | 0.397187 | 0.522268 | -6.75382 |
| NPC2      | 0.156969 | 6.859192 | 0.847823 | 0.397563 | 0.522702 | -6.76701 |
| TRIM6     | 0.406712 | 1.283346 | 0.847431 | 0.397781 | 0.522856 | -5.92461 |
| CMC1      | -0.15365 | 2.681914 | -0.84741 | 0.397793 | 0.522856 | -6.261   |
| NOL9      | -0.14374 | 4.565378 | -0.8475  | 0.397742 | 0.522856 | -6.6384  |
| DRAM1     | -0.22498 | 4.515985 | -0.84648 | 0.398312 | 0.523489 | -6.64145 |
| RAB9A     | -0.14951 | 4.375427 | -0.84608 | 0.398531 | 0.523728 | -6.61463 |
| DERL2     | -0.12537 | 4.491118 | -0.84589 | 0.39864  | 0.523822 | -6.62726 |
| DOK1      | -0.24608 | 2.837521 | -0.84554 | 0.398831 | 0.524023 | -6.31347 |
| C12orf41  | 0.120341 | 4.419413 | 0.845145 | 0.399053 | 0.524232 | -6.58614 |
| ABHD12    | -0.15345 | 5.916749 | -0.84512 | 0.399065 | 0.524232 | -6.75691 |
| CD28      | 0.401437 | 0.607473 | 0.844656 | 0.399325 | 0.524476 | -5.82308 |
| TNKS      | -0.17943 | 6.032697 | -0.8447  | 0.399299 | 0.524476 | -6.76209 |
| SMARCAL1  | 0.10367  | 4.453164 | 0.84426  | 0.399546 | 0.524716 | -6.59412 |
| LRRCS7    | 0.119225 | 4.017522 | 0.843382 | 0.400035 | 0.52531  | -6.50983 |
| PAN3      | -0.13415 | 5.517893 | -0.84317 | 0.400154 | 0.525415 | -6.73624 |
| HEYL      | 0.317364 | 4.027093 | 0.842532 | 0.40051  | 0.525785 | -6.4735  |
| EIF3K     | -0.15407 | 6.710593 | -0.84256 | 0.400492 | 0.525785 | -6.77081 |
| CCDC122   | -0.2609  | 1.312613 | -0.84218 | 0.400705 | 0.525893 | -6.03015 |
| METTL2A   | 0.134726 | 4.286018 | 0.84231  | 0.400634 | 0.525893 | -6.56202 |
| ULK3      | -0.17698 | 5.193168 | -0.84222 | 0.400686 | 0.525893 | -6.71404 |
| GM2A      | 0.28901  | 6.867153 | 0.842114 | 0.400743 | 0.525893 | -6.7715  |
| TM4SF18   | -0.30862 | 0.980757 | -0.84115 | 0.401284 | 0.526554 | -5.97999 |
| GNB1      | 0.114329 | 8.56233  | 0.840802 | 0.401476 | 0.526756 | -6.73338 |
| TGM3      | -1.03992 | 1.832004 | -0.84073 | 0.401515 | 0.526758 | -6.25775 |
| C6orf125  | 0.154838 | 4.960026 | 0.840645 | 0.401564 | 0.526772 | -6.65924 |
| LPPR4     | 0.421011 | 1.470722 | 0.839823 | 0.402023 | 0.527227 | -5.95891 |
| PRSS12    | 0.632842 | 2.863098 | 0.839845 | 0.402011 | 0.527227 | -6.15816 |
| RASEF     | -0.53527 | 3.225954 | -0.83984 | 0.402015 | 0.527227 | -6.45558 |
| RASSF7    | 0.282088 | 4.880064 | 0.83936  | 0.402283 | 0.527517 | -6.63431 |
| ANKRD19   | 0.271938 | 0.530301 | 0.839    | 0.402484 | 0.527682 | -5.83307 |
| CD163     | -0.39707 | 3.673435 | -0.83901 | 0.402477 | 0.527682 | -6.53905 |
| NAIF1     | 0.119241 | 3.400064 | 0.838762 | 0.402617 | 0.527807 | -6.37603 |
| OFD1      | -0.1504  | 4.794942 | -0.83864 | 0.402685 | 0.527841 | -6.67354 |
| HEXB      | 0.1505   | 6.283636 | 0.838581 | 0.402719 | 0.527841 | -6.76574 |
| RAB3GAP2  | 0.103409 | 6.203697 | 0.838203 | 0.40293  | 0.528069 | -6.76484 |
| CD248     | -0.3023  | 4.976327 | -0.83809 | 0.402993 | 0.528102 | -6.70764 |
| SDR42E1   | -0.42814 | 2.945631 | -0.83767 | 0.403228 | 0.528361 | -6.38203 |
| FAM98A    | -0.10984 | 5.521633 | -0.83755 | 0.403297 | 0.528401 | -6.73978 |
| SETD6     | -0.19326 | 3.646789 | -0.83711 | 0.403544 | 0.528675 | -6.49683 |
| RNF128    | -0.60512 | 4.491285 | -0.83693 | 0.403642 | 0.528754 | -6.68305 |
| FLYWCH2   | 0.184486 | 3.356491 | 0.836802 | 0.403716 | 0.528801 | -6.35466 |
| C14orf93  | 0.125192 | 3.16904  | 0.83664  | 0.403806 | 0.52882  | -6.32384 |
| L3MBTL2   | -0.09605 | 5.18978  | -0.83664 | 0.403804 | 0.52882  | -6.71181 |
| LRRCS3    | -0.27117 | 1.729479 | -0.83601 | 0.404157 | 0.52918  | -6.11065 |
| NENF      | 0.169391 | 5.032924 | 0.836034 | 0.404147 | 0.52918  | -6.67089 |

|          |          |          |          |          |          |          |
|----------|----------|----------|----------|----------|----------|----------|
| SNX4     | -0.12277 | 5.356787 | -0.83569 | 0.404342 | 0.529323 | -6.72938 |
| C11orf59 | 0.175225 | 6.319075 | 0.835688 | 0.404341 | 0.529323 | -6.76863 |
| PIGQ     | -0.12848 | 5.244492 | -0.83519 | 0.40462  | 0.529637 | -6.72056 |
| LOC93622 | -0.1842  | 3.011051 | -0.83445 | 0.405035 | 0.530132 | -6.35329 |
| IL13RA1  | -0.17346 | 7.154403 | -0.83421 | 0.405171 | 0.53026  | -6.77052 |
| TMX2     | 0.130917 | 6.28436  | 0.834115 | 0.405224 | 0.530279 | -6.7701  |
| PPP1R3G  | -0.3644  | 0.222375 | -0.834   | 0.40529  | 0.530316 | -5.87803 |
| UBE2W    | -0.12183 | 5.291247 | -0.83368 | 0.405469 | 0.5305   | -6.72559 |
| FCGRT    | -0.29079 | 6.054913 | -0.83351 | 0.405565 | 0.530576 | -6.77453 |
| UNC50    | -0.10671 | 4.637174 | -0.83339 | 0.405629 | 0.530611 | -6.65448 |
| CLDN2    | 1.143966 | 1.331632 | 0.833216 | 0.40573  | 0.530692 | -5.83658 |
| C12orf5  | 0.14749  | 4.415264 | 0.833063 | 0.405816 | 0.530755 | -6.59114 |
| ZNF283   | -0.17869 | 1.769946 | -0.8328  | 0.405964 | 0.530899 | -6.10437 |
| STXBP1   | -0.29129 | 5.266229 | -0.83268 | 0.406029 | 0.530935 | -6.73676 |
| CYorf15A | 0.905323 | 0.75794  | 0.831556 | 0.406664 | 0.531694 | -5.79402 |
| RINL     | 0.319516 | 2.257738 | 0.831518 | 0.406685 | 0.531694 | -6.11393 |
| TJAP1    | 0.181763 | 5.239647 | 0.831158 | 0.406888 | 0.531909 | -6.69651 |
| STX1B    | -0.30827 | 0.289095 | -0.83083 | 0.407075 | 0.532103 | -5.88082 |
| TMSB15B  | -0.38142 | 0.090619 | -0.83034 | 0.407348 | 0.532312 | -5.86224 |
| KIAA1543 | 0.301586 | 5.670556 | 0.830368 | 0.407334 | 0.532312 | -6.72747 |
| NUB1     | 0.141742 | 5.967017 | 0.830341 | 0.407349 | 0.532312 | -6.75931 |
| RASGEF1B | 0.264618 | 3.4167   | 0.830262 | 0.407393 | 0.53232  | -6.35695 |
| RBM41    | 0.158417 | 3.940458 | 0.829924 | 0.407584 | 0.53252  | -6.49782 |
| PHRF1    | -0.11279 | 6.320924 | -0.82979 | 0.407662 | 0.532571 | -6.77984 |
| HNRNP2   | 0.093987 | 6.440005 | 0.82946  | 0.407846 | 0.532762 | -6.77888 |
| CYTH3    | -0.16497 | 5.418045 | -0.82882 | 0.408206 | 0.533183 | -6.74307 |
| RTN4RL1  | -0.5797  | 0.640683 | -0.82814 | 0.408593 | 0.533638 | -5.97785 |
| TFDP2    | 0.201149 | 4.217832 | 0.828053 | 0.40864  | 0.53365  | -6.55019 |
| KRT10    | 0.412824 | 5.981382 | 0.827986 | 0.408678 | 0.53365  | -6.747   |
| DMBT1    | 2.167501 | 3.158861 | 0.827783 | 0.408793 | 0.53375  | -5.97738 |
| ETNK1    | -0.23029 | 6.383087 | -0.82755 | 0.408926 | 0.533873 | -6.78364 |
| AAGAB    | 0.129481 | 5.662171 | 0.827304 | 0.409063 | 0.534003 | -6.74267 |
| C10orf12 | 0.189067 | 4.129351 | 0.827128 | 0.409163 | 0.534083 | -6.53302 |
| DYNC1H1  | -0.15686 | 9.318443 | -0.82691 | 0.409286 | 0.534193 | -6.70986 |
| SC5DL    | -0.21076 | 6.357293 | -0.8268  | 0.409346 | 0.534222 | -6.7839  |
| ZSWIM3   | -0.1884  | 2.112052 | -0.82649 | 0.409523 | 0.534279 | -6.17173 |
| GATS     | -0.28676 | 2.859587 | -0.82639 | 0.40958  | 0.534279 | -6.34994 |
| HLA-DRB5 | 0.588235 | 3.80046  | 0.826406 | 0.409571 | 0.534279 | -6.38238 |
| ATP5SL   | -0.11346 | 5.376269 | -0.82656 | 0.409484 | 0.534279 | -6.73792 |
| STAT3    | 0.13324  | 8.25772  | 0.826472 | 0.409534 | 0.534279 | -6.75599 |
| CROT     | -0.2344  | 4.157442 | -0.82584 | 0.409893 | 0.534637 | -6.61207 |
| PLSCR3   | 0.221235 | 5.154787 | 0.825673 | 0.409986 | 0.534708 | -6.68835 |
| SETD4    | -0.13437 | 3.335682 | -0.82506 | 0.410335 | 0.534913 | -6.42407 |
| GPATCH1  | 0.146873 | 3.753904 | 0.825252 | 0.410225 | 0.534913 | -6.46153 |
| PPIC     | 0.193189 | 4.775151 | 0.825062 | 0.410332 | 0.534913 | -6.64537 |
| RP2      | 0.179202 | 4.964058 | 0.825139 | 0.410289 | 0.534913 | -6.67057 |
| SBNO1    | 0.133689 | 5.454924 | 0.825241 | 0.410231 | 0.534913 | -6.72688 |
| KCTD21   | -0.17405 | 3.71032  | -0.82483 | 0.410464 | 0.535032 | -6.51659 |
| PIK3IP1  | -0.21757 | 4.475321 | -0.82472 | 0.410524 | 0.53506  | -6.65399 |
| 2-Sep    | -0.10331 | 8.499601 | -0.82436 | 0.41073  | 0.535278 | -6.74242 |
|          | 0.122451 | 4.446005 | 0.824097 | 0.410879 | 0.535423 | -6.60796 |
|          | 0.495197 | 3.165643 | 0.824004 | 0.410932 | 0.535441 | -6.26781 |
|          | -0.13708 | 5.108177 | -0.82361 | 0.411152 | 0.535679 | -6.71835 |
|          | 0.112733 | 4.936577 | 0.823292 | 0.411335 | 0.535867 | -6.67582 |
|          | -0.37196 | 4.277154 | -0.82303 | 0.411482 | 0.536009 | -6.64695 |
|          | -0.19685 | 6.682946 | -0.82271 | 0.411664 | 0.536196 | -6.78715 |
|          | 0.216172 | 7.516507 | 0.822423 | 0.411828 | 0.536359 | -6.77989 |
|          | -0.11621 | 6.456947 | -0.82197 | 0.412087 | 0.536647 | -6.78805 |
|          |          |          |          |          |          |          |
| DIMT1L   |          |          |          |          |          |          |
| MLLT11   |          |          |          |          |          |          |
| RAP1GDS1 |          |          |          |          |          |          |
| TRUB1    |          |          |          |          |          |          |
| EGLN3    |          |          |          |          |          |          |
| SSR4     |          |          |          |          |          |          |
| RPS18    |          |          |          |          |          |          |
| ITCH     |          |          |          |          |          |          |

|          |          |          |          |          |          |          |
|----------|----------|----------|----------|----------|----------|----------|
| TMEM90B  | 0.559005 | 0.341753 | 0.821377 | 0.412422 | 0.537033 | -5.78339 |
| DYSF     | -0.27773 | 4.498442 | -0.82103 | 0.412621 | 0.537239 | -6.66719 |
| MRPL27   | -0.13349 | 4.867785 | -0.82096 | 0.412657 | 0.537239 | -6.69456 |
| EFHC1    | -0.189   | 3.457404 | -0.82073 | 0.412791 | 0.537362 | -6.4651  |
| HIST1H3E | 0.334712 | 0.812762 | 0.820599 | 0.412864 | 0.537408 | -5.88016 |
| SAMD5    | -0.55595 | 3.584322 | -0.82044 | 0.412957 | 0.537478 | -6.56155 |
| UBR2     | -0.17013 | 5.880618 | -0.81995 | 0.413231 | 0.537786 | -6.7769  |
| SYF2     | -0.11799 | 5.502342 | -0.81954 | 0.413467 | 0.538042 | -6.75368 |
| ZNF714   | 0.321437 | 3.696381 | 0.81942  | 0.413535 | 0.53808  | -6.41876 |
| CD3G     | 0.47015  | 0.080487 | 0.81868  | 0.413956 | 0.538578 | -5.75924 |
| CD53     | 0.365289 | 3.946975 | 0.81847  | 0.414076 | 0.538684 | -6.46919 |
| TSPYL3   | -0.30832 | 0.19189  | -0.8183  | 0.414175 | 0.538763 | -5.87652 |
| OGFOD2   | -0.11385 | 3.504647 | -0.81802 | 0.41433  | 0.538914 | -6.46179 |
| B3GNT7   | -0.50316 | 4.651634 | -0.81793 | 0.414384 | 0.538934 | -6.70736 |
| ZMYM2    | -0.14544 | 6.448006 | -0.81682 | 0.415016 | 0.539706 | -6.79238 |
| MPPED2   | -0.48251 | 0.211037 | -0.81672 | 0.415076 | 0.539734 | -5.90582 |
| PLAC2    | 0.917032 | 1.983068 | 0.81662  | 0.41513  | 0.539754 | -5.99251 |
| C15orf40 | -0.10917 | 3.14813  | -0.81612 | 0.415413 | 0.539971 | -6.38288 |
| MSRB2    | -0.18183 | 3.945003 | -0.81614 | 0.415402 | 0.539971 | -6.57244 |
| ZNF281   | 0.153029 | 4.285781 | 0.816165 | 0.41539  | 0.539971 | -6.58083 |
| KCNJ2    | 0.349851 | 2.425    | 0.81557  | 0.415729 | 0.540332 | -6.15145 |
| SBSN     | 1.783687 | 2.713391 | 0.814653 | 0.416253 | 0.540836 | -5.98371 |
| SDHAP2   | 0.235632 | 4.021518 | 0.814796 | 0.416171 | 0.540836 | -6.51231 |
| TULP4    | -0.14802 | 6.033557 | -0.81462 | 0.416272 | 0.540836 | -6.78607 |
| CD99     | -0.20356 | 6.443291 | -0.81465 | 0.416254 | 0.540836 | -6.79437 |
| PEX6     | -0.29612 | 4.372247 | -0.81431 | 0.416451 | 0.541018 | -6.65687 |
| MORC4    | 0.20172  | 5.196541 | 0.814093 | 0.416572 | 0.541077 | -6.70405 |
| BCL6     | -0.27868 | 6.049411 | -0.81409 | 0.416574 | 0.541077 | -6.79019 |
| PRPS2    | -0.1607  | 5.707703 | -0.814   | 0.416626 | 0.541095 | -6.77317 |
| TTY15    | 0.793021 | 0.11864  | 0.813824 | 0.416726 | 0.541124 | -5.73693 |
| TNFRSF21 | 0.27811  | 7.490924 | 0.813885 | 0.416691 | 0.541124 | -6.78837 |
| POT1     | 0.158394 | 4.562609 | 0.813697 | 0.416799 | 0.541131 | -6.62866 |
| ETFA     | -0.12574 | 5.749479 | -0.81368 | 0.416808 | 0.541131 | -6.77406 |
| TBXAS1   | 0.363942 | 2.498132 | 0.813564 | 0.416875 | 0.541167 | -6.16282 |
| CCR5     | 0.38461  | 1.317284 | 0.813446 | 0.416942 | 0.541204 | -5.95936 |
| IL7R     | 0.419817 | 2.650589 | 0.813207 | 0.417079 | 0.541281 | -6.18121 |
| AASDHPPT | 0.128979 | 5.317801 | 0.813213 | 0.417076 | 0.541281 | -6.72407 |
| MCTP1    | -0.33842 | 2.514703 | -0.81302 | 0.417184 | 0.541316 | -6.28971 |
| EGLN2    | -0.11627 | 5.452148 | -0.81308 | 0.417153 | 0.541316 | -6.75507 |
| FAM71E1  | 0.313844 | 0.947454 | 0.81257  | 0.417444 | 0.541603 | -5.91022 |
| HOXB4    | 0.320781 | 2.317601 | 0.812266 | 0.417617 | 0.541778 | -6.13899 |
| GSTZ1    | -0.19975 | 3.740232 | -0.81197 | 0.417784 | 0.541824 | -6.53652 |
| SNX16    | -0.16216 | 3.957442 | -0.81211 | 0.417709 | 0.541824 | -6.57483 |
| ATG5     | 0.103731 | 5.393594 | 0.812    | 0.41777  | 0.541824 | -6.73426 |
| TRAPPC1  | 0.145306 | 5.996856 | 0.811933 | 0.417808 | 0.541824 | -6.77583 |
| CD8A     | -0.42343 | 2.048249 | -0.81164 | 0.417973 | 0.541988 | -6.21244 |
| FAM173A  | -0.16997 | 2.605365 | -0.81104 | 0.418322 | 0.54239  | -6.27741 |
| PLCG1    | 0.154857 | 6.284302 | 0.810534 | 0.418609 | 0.542712 | -6.78872 |
| ZFAT     | 0.12497  | 3.778377 | 0.809892 | 0.418977 | 0.543139 | -6.4848  |
| SDAD1    | 0.119404 | 5.496705 | 0.809516 | 0.419193 | 0.543368 | -6.74454 |
| TLR7     | 0.427145 | 0.319861 | 0.80937  | 0.419276 | 0.543426 | -5.80608 |
| HSD11B1L | -0.26617 | 1.413518 | -0.80918 | 0.419384 | 0.543465 | -6.07561 |
| PRR24    | -0.17156 | 3.086425 | -0.80923 | 0.419357 | 0.543465 | -6.38807 |
| PSTK     | -0.17508 | 0.806582 | -0.80876 | 0.419625 | 0.543727 | -5.95969 |
| ADRA2A   | 0.726299 | 2.257682 | 0.807966 | 0.420083 | 0.544218 | -6.06835 |
| PRRG2    | 0.276643 | 2.751272 | 0.807966 | 0.420083 | 0.544218 | -6.22507 |
| USP35    | 0.198661 | 3.282736 | 0.806937 | 0.420674 | 0.544883 | -6.36027 |
| ELMOD2   | -0.12136 | 3.093481 | -0.80697 | 0.420652 | 0.544883 | -6.3801  |

|           |          |          |          |          |          |          |
|-----------|----------|----------|----------|----------|----------|----------|
| SDCCAG8   | 0.151184 | 4.386306 | 0.806575 | 0.420882 | 0.545102 | -6.60693 |
| KRT6C     | 2.099837 | 4.240411 | 0.806073 | 0.421171 | 0.545316 | -6.20217 |
| C14orf179 | 0.128572 | 3.352467 | 0.806016 | 0.421203 | 0.545316 | -6.38925 |
| ROBO1     | 0.314278 | 5.591334 | 0.806032 | 0.421194 | 0.545316 | -6.74048 |
| SRP14     | -0.10848 | 7.278719 | -0.80605 | 0.421183 | 0.545316 | -6.79217 |
| GDPD3     | -0.42026 | 1.657019 | -0.80551 | 0.421495 | 0.545644 | -6.1429  |
| PDIK1L    | -0.14049 | 4.057909 | -0.80476 | 0.421928 | 0.546153 | -6.59561 |
| SPOCK2    | -0.36255 | 4.429873 | -0.80449 | 0.422079 | 0.546299 | -6.68146 |
| TSSC4     | -0.12284 | 4.380353 | -0.80437 | 0.422151 | 0.546341 | -6.64618 |
| HIST4H4   | -0.22056 | 0.136791 | -0.80397 | 0.422382 | 0.546589 | -5.86527 |
| RNF144A   | 0.254068 | 4.512655 | 0.80371  | 0.422531 | 0.546731 | -6.61623 |
| APP       | 0.156895 | 9.443783 | 0.803081 | 0.422894 | 0.54715  | -6.73444 |
| AMBRA1    | -0.10889 | 5.377873 | -0.80294 | 0.422974 | 0.547202 | -6.75676 |
| EPN3      | -0.40756 | 5.269594 | -0.80246 | 0.423254 | 0.547514 | -6.76778 |
| PARP6     | -0.25388 | 4.837247 | -0.80211 | 0.423456 | 0.547704 | -6.71883 |
| NDUFB9    | 0.171946 | 6.750708 | 0.802067 | 0.423479 | 0.547704 | -6.8043  |
| EHD2      | -0.29273 | 7.315937 | -0.80171 | 0.423686 | 0.547922 | -6.79133 |
| FHL2      | 0.261429 | 6.306246 | 0.801304 | 0.423919 | 0.548172 | -6.79343 |
| IPMK      | 0.211928 | 2.53668  | 0.801191 | 0.423984 | 0.548205 | -6.20452 |
| GPR97     | -0.35197 | 0.061637 | -0.80094 | 0.424129 | 0.548342 | -5.87511 |
| SDR16C5   | 0.633282 | 3.595571 | 0.800709 | 0.424263 | 0.548464 | -6.34203 |
| PARD6G    | 0.513033 | 4.083455 | 0.800551 | 0.424354 | 0.548481 | -6.4883  |
| NPIP      | -0.23914 | 3.577695 | -0.80056 | 0.424349 | 0.548481 | -6.52085 |
| C2orf15   | 0.376731 | 0.982513 | 0.800346 | 0.424472 | 0.548528 | -5.91561 |
| MVD       | 0.19492  | 4.623193 | 0.800276 | 0.424513 | 0.548528 | -6.64314 |
| TSPAN1    | -0.64926 | 4.871176 | -0.80029 | 0.424504 | 0.548528 | -6.75438 |
| TBCA      | -0.13592 | 5.513767 | -0.80021 | 0.424548 | 0.548528 | -6.77117 |
| ZCCHC7    | 0.12826  | 4.311381 | 0.799924 | 0.424716 | 0.548695 | -6.60239 |
| CWC15     | 0.127276 | 4.690562 | 0.799551 | 0.424932 | 0.548797 | -6.66203 |
| SFXN3     | 0.203513 | 5.111658 | 0.799516 | 0.424952 | 0.548797 | -6.70569 |
| EXOC1     | -0.11625 | 5.586319 | -0.79956 | 0.424929 | 0.548797 | -6.77546 |
| TMEM127   | -0.09455 | 7.293805 | -0.79965 | 0.424872 | 0.548797 | -6.79722 |
| IFT57     | -0.14634 | 4.715803 | -0.79896 | 0.425276 | 0.549165 | -6.69685 |
| FAIM3     | 0.35199  | 2.279506 | 0.798743 | 0.425399 | 0.549272 | -6.13834 |
| FAM18B    | 0.146915 | 5.012495 | 0.798296 | 0.425658 | 0.549556 | -6.70119 |
| TACO1     | 0.137869 | 4.099497 | 0.798133 | 0.425752 | 0.549627 | -6.55974 |
| PDLIM2    | 0.270912 | 4.529237 | 0.798001 | 0.425829 | 0.549675 | -6.62225 |
| PKP4      | 0.13175  | 6.807391 | 0.797864 | 0.425908 | 0.549726 | -6.80793 |
| MESDC2    | 0.109301 | 5.849072 | 0.797411 | 0.42617  | 0.550014 | -6.7809  |
| CCDC120   | 0.208509 | 5.133544 | 0.797277 | 0.426248 | 0.550063 | -6.70966 |
| GOLGA7    | 0.142863 | 5.799173 | 0.797137 | 0.426329 | 0.550067 | -6.7762  |
| MAPK14    | -0.09844 | 6.202038 | -0.79714 | 0.426329 | 0.550067 | -6.80358 |
| PTPRR     | -0.55192 | 0.338864 | -0.79676 | 0.426546 | 0.550296 | -5.94421 |
| DOK2      | 0.346661 | 1.76433  | 0.796495 | 0.426701 | 0.550445 | -6.05313 |
| UGT8      | 0.696579 | 3.594295 | 0.796399 | 0.426757 | 0.550466 | -6.32904 |
| UHRF1BP1  | -0.14452 | 5.629378 | -0.79547 | 0.427294 | 0.551108 | -6.78291 |
| PEG10     | -0.60278 | 3.07652  | -0.79505 | 0.427536 | 0.55137  | -6.48659 |
| OAF       | 0.213    | 5.238688 | 0.794882 | 0.427637 | 0.551448 | -6.72188 |
| KHK       | 0.306634 | 2.11992  | 0.79471  | 0.427736 | 0.551526 | -6.11998 |
| AP1M1     | 0.147588 | 5.546886 | 0.794613 | 0.427793 | 0.551548 | -6.7587  |
| QRICH2    | -0.28113 | 1.547527 | -0.79421 | 0.428026 | 0.551797 | -6.11273 |
| SLFN13    | 0.444288 | 4.332009 | 0.793581 | 0.428392 | 0.552218 | -6.55309 |
| BTN2A1    | 0.15635  | 4.265655 | 0.793486 | 0.428448 | 0.552239 | -6.59489 |
| PRF1      | 0.41233  | 2.038058 | 0.793322 | 0.428543 | 0.552311 | -6.09129 |
| FLYWCH1   | -0.18446 | 5.166183 | -0.79316 | 0.428637 | 0.552381 | -6.75223 |
| LSM3      | 0.133016 | 5.034331 | 0.792392 | 0.429083 | 0.552854 | -6.70992 |
| LYRM2     | -0.10374 | 4.939653 | -0.79243 | 0.429061 | 0.552854 | -6.7229  |
| SYCP2     | -0.47397 | 1.686906 | -0.79224 | 0.429172 | 0.552867 | -6.16683 |

|          |          |          |          |          |          |          |
|----------|----------|----------|----------|----------|----------|----------|
| C1QTNF1  | -0.27225 | 5.242213 | -0.79228 | 0.429147 | 0.552867 | -6.76643 |
| CCNJ     | 0.168173 | 3.445178 | 0.791878 | 0.429382 | 0.553086 | -6.41388 |
| C3orf59  | 0.242067 | 3.243865 | 0.791804 | 0.429425 | 0.553091 | -6.35354 |
| MAP4K5   | 0.13937  | 5.79626  | 0.791472 | 0.429618 | 0.553207 | -6.78077 |
| IDS      | -0.18052 | 7.57689  | -0.79145 | 0.429634 | 0.553207 | -6.79564 |
| MED13    | 0.127012 | 7.195763 | 0.791512 | 0.429595 | 0.553207 | -6.80916 |
| ATG10    | -0.14286 | 2.0082   | -0.79094 | 0.42993  | 0.553485 | -6.17367 |
| PHTF1    | -0.18704 | 3.346921 | -0.791   | 0.429895 | 0.553485 | -6.46307 |
| FOXA2    | -0.82553 | 1.478184 | -0.79083 | 0.42999  | 0.553512 | -6.17245 |
| BRI3     | -0.1702  | 6.048118 | -0.78978 | 0.430603 | 0.554251 | -6.80693 |
| SERPINB6 | -0.2755  | 6.238717 | -0.78965 | 0.43068  | 0.554299 | -6.81305 |
| TCP11L1  | -0.16804 | 3.984804 | -0.78954 | 0.430743 | 0.554329 | -6.59983 |
| LCAT     | -0.2139  | 2.046766 | -0.78941 | 0.430819 | 0.554375 | -6.19383 |
| TCHP     | -0.12658 | 4.227213 | -0.78918 | 0.430952 | 0.554494 | -6.63624 |
| FOXA1    | -0.54941 | 4.839954 | -0.78889 | 0.431121 | 0.554662 | -6.75339 |
| GALM     | 0.418714 | 3.934838 | 0.788413 | 0.431401 | 0.55497  | -6.47374 |
| MYCN     | -0.51862 | 0.718493 | -0.78806 | 0.431605 | 0.554995 | -6.00879 |
| C6orf64  | 0.150051 | 4.496248 | 0.788151 | 0.431554 | 0.554995 | -6.63966 |
| PMPCA    | 0.124222 | 5.389439 | 0.788241 | 0.431501 | 0.554995 | -6.75122 |
| ZNF148   | 0.137113 | 6.21044  | 0.788263 | 0.431489 | 0.554995 | -6.80444 |
| ZBTB38   | -0.18201 | 6.751805 | -0.78804 | 0.431618 | 0.554995 | -6.81433 |
| WDR33    | 0.076676 | 6.15747  | 0.787682 | 0.431828 | 0.555212 | -6.80495 |
| RNF20    | -0.09542 | 5.933274 | -0.78727 | 0.432067 | 0.555469 | -6.80252 |
| DNAJC16  | -0.10619 | 5.077105 | -0.7872  | 0.432107 | 0.55547  | -6.74145 |
| PTPLB    | 0.209255 | 4.475099 | 0.786995 | 0.432228 | 0.555574 | -6.62907 |
| ADRBK2   | -0.25288 | 4.112192 | -0.78657 | 0.432474 | 0.555839 | -6.63832 |
| LYPLAL1  | -0.18111 | 3.692691 | -0.78612 | 0.432742 | 0.556132 | -6.54547 |
| GTDC1    | 0.144353 | 3.852048 | 0.786025 | 0.432795 | 0.55615  | -6.51554 |
| RAB43    | 0.185138 | 3.976745 | 0.785834 | 0.432907 | 0.55624  | -6.53367 |
| SLC38A2  | -0.23825 | 8.401885 | -0.78577 | 0.432945 | 0.55624  | -6.77257 |
| KLHL35   | 0.442862 | 0.144517 | 0.78537  | 0.433178 | 0.556386 | -5.79545 |
| C12orf24 | 0.224536 | 1.867173 | 0.78539  | 0.433167 | 0.556386 | -6.09771 |
| LENG1    | -0.11765 | 2.412385 | -0.78546 | 0.433123 | 0.556386 | -6.24957 |
| SNRNP35  | -0.1217  | 3.709615 | -0.78503 | 0.433379 | 0.556387 | -6.53698 |
| PIBF1    | 0.144138 | 4.067314 | 0.785211 | 0.433271 | 0.556387 | -6.56251 |
| IFT122   | -0.14905 | 4.600711 | -0.78525 | 0.433249 | 0.556387 | -6.69361 |
| PRPF8    | -0.13102 | 8.908054 | -0.78514 | 0.43331  | 0.556387 | -6.75841 |
| VAMP7    | 0.104891 | 5.683659 | 0.785038 | 0.433372 | 0.556387 | -6.77998 |
| KIAA1671 | -0.18698 | 7.051323 | -0.78473 | 0.433554 | 0.556562 | -6.81214 |
| SMOC1    | -0.61068 | 0.501848 | -0.78432 | 0.433792 | 0.556816 | -5.98677 |
| RGPD1    | 0.317007 | 4.282608 | 0.784158 | 0.433887 | 0.556874 | -6.57496 |
| FYTTD1   | 0.172404 | 6.663211 | 0.784108 | 0.433917 | 0.556874 | -6.81768 |
| OTUD3    | -0.19555 | 4.028803 | -0.78345 | 0.434303 | 0.557318 | -6.6169  |
| AEN      | 0.162815 | 4.81844  | 0.783307 | 0.434385 | 0.557356 | -6.68716 |
| NXN      | -0.35081 | 5.603922 | -0.78326 | 0.434412 | 0.557356 | -6.80107 |
| AGAP2    | 0.343135 | 2.119872 | 0.783181 | 0.434459 | 0.557365 | -6.12313 |
| RPS28    | -0.55321 | 2.358181 | -0.7831  | 0.434506 | 0.557373 | -6.32161 |
| LRRC8A   | 0.237618 | 7.503491 | 0.783034 | 0.434546 | 0.557374 | -6.812   |
| ELOVL1   | 0.156751 | 6.699889 | 0.782204 | 0.435032 | 0.557946 | -6.81968 |
| C19orf76 | 0.291256 | 0.63678  | 0.781767 | 0.435288 | 0.558223 | -5.8911  |
| ABCB9    | 0.185792 | 3.179786 | 0.78134  | 0.435539 | 0.558493 | -6.35831 |
| MPP1     | -0.25912 | 3.377466 | -0.78113 | 0.435665 | 0.558604 | -6.49677 |
| PM20D2   | 0.191043 | 5.397905 | 0.780972 | 0.435754 | 0.558667 | -6.75227 |
| FAAH2    | 0.310636 | 2.212285 | 0.780642 | 0.435948 | 0.558865 | -6.14395 |
| UTY      | 0.934172 | 1.509947 | 0.780393 | 0.436094 | 0.558976 | -5.94205 |
| SRPK2    | 0.161249 | 5.61604  | 0.780357 | 0.436115 | 0.558976 | -6.77437 |
| EFCAB7   | 0.163596 | 2.2356   | 0.779882 | 0.436394 | 0.559283 | -6.17572 |
| FBXL20   | -0.14456 | 3.743027 | -0.77974 | 0.436475 | 0.559335 | -6.55341 |



|            |          |          |          |          |          |          |
|------------|----------|----------|----------|----------|----------|----------|
| NANS       | -0.17198 | 5.314578 | -0.77964 | 0.436536 | 0.559362 | -6.77404 |
| EIF5       | -0.11089 | 7.899643 | -0.77944 | 0.436656 | 0.559465 | -6.79788 |
| DCAF16     | -0.13815 | 5.157221 | -0.7792  | 0.436798 | 0.559594 | -6.75848 |
| ST6GALNAC2 | 0.515699 | 4.023089 | 0.778406 | 0.437262 | 0.560105 | -6.48717 |
| CIR1       | 0.133579 | 5.002647 | 0.778381 | 0.437276 | 0.560105 | -6.71726 |
| ZNF532     | 0.223706 | 6.11348  | 0.777927 | 0.437544 | 0.560396 | -6.80511 |
| GPCPD1     | -0.21858 | 5.794802 | -0.77779 | 0.437625 | 0.560449 | -6.80863 |
| C3orf58    | -0.25042 | 5.403195 | -0.77737 | 0.437869 | 0.560709 | -6.78881 |
| LOC646762  | -0.24608 | 3.947928 | -0.77679 | 0.438215 | 0.561101 | -6.61594 |
| SLAMF7     | 0.477647 | 3.182898 | 0.776355 | 0.438468 | 0.56134  | -6.30501 |
| VIPAR      | -0.10255 | 4.46158  | -0.77633 | 0.438482 | 0.56134  | -6.67716 |
| DAPL1      | 1.073501 | 0.466965 | 0.77609  | 0.438625 | 0.561472 | -5.7718  |
| RSU1       | -0.13756 | 5.95602  | -0.77591 | 0.43873  | 0.561504 | -6.81377 |
| RAB21      | -0.11806 | 6.026107 | -0.77591 | 0.438728 | 0.561504 | -6.81561 |
| CCDC102A   | 0.231921 | 2.688111 | 0.775293 | 0.439094 | 0.561919 | -6.25369 |
| GDF15      | 0.720938 | 3.329115 | 0.774751 | 0.439413 | 0.562275 | -6.2836  |
| RINT1      | 0.126127 | 4.871827 | 0.774676 | 0.439458 | 0.562281 | -6.70492 |
| PRPF18     | -0.09837 | 4.073619 | -0.77419 | 0.439746 | 0.562598 | -6.6155  |
| C21orf57   | -0.17052 | 2.255795 | -0.77379 | 0.439978 | 0.562843 | -6.238   |
| ITGB7      | 0.323682 | 2.684411 | 0.773704 | 0.440032 | 0.56286  | -6.23601 |
| ASCC1      | 0.114153 | 4.725571 | 0.773051 | 0.440417 | 0.563301 | -6.68925 |
| GPN2       | -0.09984 | 4.095689 | -0.77282 | 0.440552 | 0.563423 | -6.62154 |
| MTERF      | 0.236874 | 3.377483 | 0.772382 | 0.440812 | 0.563704 | -6.40001 |
| FKBP4      | 0.177028 | 7.133842 | 0.771644 | 0.441248 | 0.564209 | -6.82623 |
| SCNN1D     | -0.3736  | 1.454258 | -0.77152 | 0.441321 | 0.564251 | -6.12606 |
| SBK1       | 0.50512  | 2.467622 | 0.770169 | 0.44212  | 0.565222 | -6.17051 |
| GPR132     | 0.320802 | 1.822466 | 0.770054 | 0.442188 | 0.565256 | -6.08555 |
| CD38       | 0.516165 | 1.53228  | 0.769696 | 0.4424   | 0.565424 | -6.00917 |
| UBC        | -0.13776 | 10.8647  | -0.76973 | 0.44238  | 0.565424 | -6.70137 |
| AFMID      | -0.145   | 3.6566   | -0.76856 | 0.443075 | 0.566081 | -6.54082 |
| ROBLD3     | 0.13683  | 4.507867 | 0.768635 | 0.443028 | 0.566081 | -6.65794 |
| TUBGCP5    | -0.13048 | 4.268117 | -0.7685  | 0.443108 | 0.566081 | -6.65861 |
| TULP3      | 0.139745 | 4.963258 | 0.768567 | 0.443069 | 0.566081 | -6.71975 |
| NFIL3      | -0.19039 | 5.091267 | -0.76849 | 0.443117 | 0.566081 | -6.76534 |
| NINL       | -0.23013 | 4.177317 | -0.7684  | 0.443167 | 0.566093 | -6.65895 |
| CDC42BPG   | 0.254583 | 5.508545 | 0.768185 | 0.443295 | 0.566205 | -6.76571 |
| RNASET2    | -0.24929 | 5.405202 | -0.76761 | 0.443639 | 0.566592 | -6.79563 |
| FAM167B    | 0.22759  | 1.168223 | 0.767505 | 0.443698 | 0.566617 | -5.99124 |
| MYEOV2     | -0.1259  | 4.529965 | -0.76727 | 0.44384  | 0.566746 | -6.69578 |
| ZCCHC6     | -0.15175 | 5.730068 | -0.76708 | 0.443953 | 0.566838 | -6.81091 |
| ADAM6      | -0.69006 | 8.613716 | -0.767   | 0.443996 | 0.566841 | -6.76511 |
| AK7        | -0.33804 | 0.918119 | -0.76634 | 0.444387 | 0.567289 | -6.03302 |
| KDM5C      | -0.11048 | 7.107659 | -0.76608 | 0.444544 | 0.567437 | -6.82674 |
| CERCAM     | 0.328123 | 5.156432 | 0.765734 | 0.444749 | 0.567647 | -6.72423 |
| TMEM43     | -0.12935 | 6.917888 | -0.76534 | 0.444982 | 0.567893 | -6.83028 |
| ANKZF1     | 0.125287 | 4.702068 | 0.764988 | 0.445192 | 0.568109 | -6.69007 |
| GMPPA      | 0.151861 | 5.236933 | 0.764913 | 0.445236 | 0.568114 | -6.75078 |
| TEP1       | -0.16869 | 5.948679 | -0.7644  | 0.445539 | 0.568448 | -6.82322 |
| RNF25      | 0.096972 | 3.84611  | 0.763887 | 0.445847 | 0.568788 | -6.54152 |
| FOXQ1      | -0.39632 | 5.300653 | -0.76361 | 0.446009 | 0.568944 | -6.80025 |
| ZNF436     | -0.18332 | 4.949534 | -0.76352 | 0.446064 | 0.568961 | -6.75458 |
| ANTXR1     | 0.312404 | 6.934513 | 0.762913 | 0.446426 | 0.569349 | -6.83489 |
| UBE2G1     | -0.12857 | 6.494651 | -0.76287 | 0.446449 | 0.569349 | -6.83499 |
| PGAM4      | 0.196456 | 2.665017 | 0.762651 | 0.446582 | 0.569466 | -6.26323 |
| CSF2RB     | -0.28232 | 3.551083 | -0.7623  | 0.44679  | 0.56968  | -6.55169 |
| FAM110C    | 0.432804 | 2.363851 | 0.762058 | 0.446935 | 0.569812 | -6.16794 |
| NARFL      | -0.12187 | 4.276657 | -0.76188 | 0.447041 | 0.569895 | -6.66338 |
| TAF3       | -0.14164 | 4.306118 | -0.76174 | 0.447123 | 0.569948 | -6.67086 |

|              |          |          |          |          |          |          |
|--------------|----------|----------|----------|----------|----------|----------|
| DAPK3        | -0.12926 | 5.301656 | -0.76167 | 0.447167 | 0.569953 | -6.78427 |
| FNBP4        | 0.114721 | 6.305207 | 0.761298 | 0.447387 | 0.570181 | -6.82902 |
| PPID         | 0.145254 | 4.81943  | 0.761143 | 0.44748  | 0.570247 | -6.70656 |
| MRAP2        | -0.47824 | 1.677163 | -0.76073 | 0.447728 | 0.570459 | -6.18989 |
| ATP5H        | -0.14005 | 5.968067 | -0.76074 | 0.447719 | 0.570459 | -6.82584 |
| HERPUD2      | 0.10036  | 5.121435 | 0.760472 | 0.44788  | 0.5706   | -6.74769 |
| DTX4         | 0.35358  | 5.21478  | 0.759879 | 0.448233 | 0.570999 | -6.73203 |
| PABPC4L      | -0.36612 | 0.514853 | -0.75968 | 0.448349 | 0.571094 | -5.97964 |
| FAM135A      | 0.227508 | 6.002522 | 0.759568 | 0.448419 | 0.571131 | -6.81306 |
| SPN          | 0.342794 | 2.628853 | 0.759021 | 0.448745 | 0.571494 | -6.23365 |
| GRAMD1A      | -0.19895 | 5.727919 | -0.7589  | 0.44882  | 0.571538 | -6.81923 |
| TMPRSS11D    | 1.40256  | 1.791752 | 0.758772 | 0.448894 | 0.571579 | -5.9334  |
| TREX1        | 0.170129 | 3.875928 | 0.758454 | 0.449084 | 0.57175  | -6.53673 |
| SPPL2B       | -0.13956 | 5.731198 | -0.75834 | 0.44915  | 0.57175  | -6.81696 |
| PSD4         | -0.20397 | 6.158597 | -0.75839 | 0.449122 | 0.57175  | -6.83466 |
| VNN2         | 0.604529 | 0.398755 | 0.757658 | 0.449559 | 0.572218 | -5.83262 |
| ABCA11P      | -0.2055  | 2.130005 | -0.75753 | 0.449635 | 0.572262 | -6.23135 |
| FUT10        | -0.17661 | 2.944424 | -0.75743 | 0.449695 | 0.572287 | -6.39394 |
| NRG1         | 0.636655 | 2.544247 | 0.756176 | 0.450445 | 0.573189 | -6.17278 |
| HINFP        | -0.121   | 3.535733 | -0.75591 | 0.450604 | 0.573263 | -6.5197  |
| C10orf137    | -0.12107 | 4.2169   | -0.75587 | 0.450626 | 0.573263 | -6.65824 |
| NFYB         | -0.11505 | 4.780355 | -0.75589 | 0.450617 | 0.573263 | -6.73471 |
| ZNF484       | 0.159188 | 2.896399 | 0.755752 | 0.450698 | 0.573303 | -6.32124 |
| CIDEB        | 0.205387 | 4.500383 | 0.755488 | 0.450856 | 0.573399 | -6.65944 |
| SF3A1        | -0.08622 | 7.188717 | -0.75551 | 0.450844 | 0.573399 | -6.83364 |
| RRN3P1       | -0.29894 | 0.92467  | -0.7552  | 0.45103  | 0.573568 | -6.03729 |
| KIAA0947     | 0.14259  | 6.199314 | 0.755025 | 0.451134 | 0.573648 | -6.82938 |
| LOC100130872 | -0.31545 | 0.510154 | -0.75461 | 0.451381 | 0.573774 | -5.97072 |
| VSIG4        | -0.36637 | 2.519096 | -0.75446 | 0.45147  | 0.573774 | -6.34299 |
| EPHA4        | -0.37689 | 3.724685 | -0.75446 | 0.451473 | 0.573774 | -6.61427 |
| RPUSD3       | 0.140541 | 4.38667  | 0.754624 | 0.451374 | 0.573774 | -6.649   |
| MFSD5        | 0.1309   | 4.822167 | 0.754547 | 0.45142  | 0.573774 | -6.71384 |
| ANKRD10      | -0.1899  | 6.024338 | -0.75445 | 0.45148  | 0.573774 | -6.83392 |
| C7orf64      | 0.186081 | 3.737596 | 0.75421  | 0.451622 | 0.573823 | -6.50521 |
| TSR2         | -0.11766 | 4.497032 | -0.75418 | 0.451641 | 0.573823 | -6.70062 |
| CAMK2N1      | 0.41821  | 5.7736   | 0.754186 | 0.451636 | 0.573823 | -6.78847 |
| IL20RA       | -0.3537  | 3.415582 | -0.75405 | 0.451715 | 0.573865 | -6.53977 |
| ADNP2        | -0.11133 | 5.485599 | -0.75387 | 0.451826 | 0.573954 | -6.80344 |
| IPO7         | 0.109381 | 7.784609 | 0.753787 | 0.451875 | 0.573964 | -6.8258  |
| IDH3G        | 0.128388 | 5.875369 | 0.753226 | 0.452212 | 0.574339 | -6.81561 |
| RPS5         | 0.172245 | 8.835613 | 0.752619 | 0.452575 | 0.574748 | -6.79546 |
| ERBB2        | 0.366417 | 7.885968 | 0.752466 | 0.452667 | 0.574812 | -6.82964 |
| TST          | -0.25632 | 5.176863 | -0.75229 | 0.452772 | 0.574894 | -6.78955 |
| LOC154761    | 0.311454 | 1.013804 | 0.75203  | 0.452928 | 0.57504  | -5.96883 |
| LCA5L        | -0.201   | 0.391736 | -0.75186 | 0.453031 | 0.575067 | -5.94122 |
| TMEM55B      | -0.09795 | 4.374147 | -0.75186 | 0.453032 | 0.575067 | -6.68253 |
| PLEKHF1      | 0.305947 | 3.339791 | 0.751256 | 0.453393 | 0.575473 | -6.39634 |
| TMEM52       | 0.349665 | 1.26121  | 0.75091  | 0.453601 | 0.575632 | -5.99707 |
| FBXO34       | 0.140903 | 5.52576  | 0.750951 | 0.453576 | 0.575632 | -6.79079 |
| GLS2         | -0.33115 | 1.906347 | -0.75063 | 0.453769 | 0.575686 | -6.21773 |
| SLC1A3       | 0.431402 | 3.349305 | 0.750651 | 0.453757 | 0.575686 | -6.37612 |
| NCRNA00094   | -0.1465  | 4.300211 | -0.75056 | 0.453808 | 0.575686 | -6.67969 |
| TMED3        | -0.18365 | 6.285484 | -0.75062 | 0.453775 | 0.575686 | -6.84254 |
| BPGM         | 0.209172 | 4.587369 | 0.750494 | 0.453851 | 0.575688 | -6.67542 |
| TMEM53       | 0.193502 | 3.215072 | 0.750336 | 0.453946 | 0.575756 | -6.3861  |
| ARL13B       | 0.172801 | 4.227897 | 0.750082 | 0.454098 | 0.575793 | -6.61959 |
| PMF1         | 0.124873 | 5.165798 | 0.750139 | 0.454064 | 0.575793 | -6.75771 |
| SPPL2A       | -0.11382 | 5.394296 | -0.75013 | 0.454067 | 0.575793 | -6.79926 |

|           |          |          |          |          |          |          |
|-----------|----------|----------|----------|----------|----------|----------|
| SDF4      | 0.118913 | 7.246751 | 0.749917 | 0.454198 | 0.575866 | -6.8401  |
| USH1C     | -0.95384 | 1.350916 | -0.74949 | 0.454454 | 0.576139 | -6.2035  |
| TSPAN15   | -0.33492 | 5.14406  | -0.74935 | 0.454538 | 0.576142 | -6.79459 |
| TRIM24    | -0.17605 | 5.371504 | -0.74935 | 0.454537 | 0.576142 | -6.80245 |
| ANXA1     | 0.494489 | 8.620475 | 0.748567 | 0.455009 | 0.576651 | -6.81568 |
| IMPDH2    | 0.155034 | 6.552062 | 0.748544 | 0.455023 | 0.576651 | -6.84345 |
| DOC2B     | -0.41986 | 1.47864  | -0.74804 | 0.455328 | 0.576986 | -6.15773 |
| SEMA3A    | -0.35891 | 3.00992  | -0.74783 | 0.455454 | 0.577093 | -6.45887 |
| SPIN3     | -0.29705 | 2.907907 | -0.74755 | 0.455623 | 0.577254 | -6.42108 |
| PRSS27    | 0.743172 | 1.915496 | 0.746608 | 0.456188 | 0.577917 | -6.05719 |
| FAM171A1  | -0.35463 | 4.403286 | -0.74654 | 0.456229 | 0.577917 | -6.72077 |
| ADM2      | 0.331027 | 3.281765 | 0.746456 | 0.45628  | 0.577929 | -6.36792 |
| TMEM159   | 0.205801 | 4.633422 | 0.746357 | 0.45634  | 0.577953 | -6.6861  |
| HSPA9     | 0.107503 | 7.799284 | 0.745998 | 0.456556 | 0.578175 | -6.83121 |
| CYB561    | -0.15071 | 6.285393 | -0.74527 | 0.456993 | 0.578675 | -6.84604 |
| CFTR      | 1.231871 | 1.51689  | 0.745096 | 0.4571   | 0.578741 | -5.91854 |
| ABCC4     | 0.239488 | 4.453893 | 0.74505  | 0.457128 | 0.578741 | -6.65208 |
| C7orf13   | 0.313542 | 2.180727 | 0.744731 | 0.45732  | 0.57888  | -6.16714 |
| KBTBD6    | 0.146587 | 4.41764  | 0.744795 | 0.457281 | 0.57888  | -6.66059 |
| RAB3B     | 0.576222 | 0.199394 | 0.744566 | 0.457419 | 0.578953 | -5.81748 |
| TMPRSS11A | 1.218585 | 0.402224 | 0.743981 | 0.457772 | 0.579348 | -5.78667 |
| LOC148189 | -0.27757 | 1.342911 | -0.74364 | 0.45798  | 0.579558 | -6.11473 |
| SPDYE6    | 0.236973 | 2.237803 | 0.743199 | 0.458245 | 0.57984  | -6.1907  |
| EYS       | -0.2168  | 0.038171 | -0.74298 | 0.458377 | 0.579909 | -5.89602 |
| NPEPL1    | -0.11559 | 5.134707 | -0.74297 | 0.458382 | 0.579909 | -6.78204 |
| C21orf67  | -0.20827 | 0.657728 | -0.74242 | 0.458716 | 0.580279 | -5.98996 |
| C19orf44  | -0.12252 | 2.621921 | -0.74193 | 0.459013 | 0.580602 | -6.32746 |
| C5orf55   | 0.226095 | 1.136921 | 0.741478 | 0.459285 | 0.580893 | -6.00691 |
| SERPINA3  | -0.61642 | 4.673272 | -0.74112 | 0.459501 | 0.581114 | -6.78088 |
| CDC42     | 0.091421 | 7.527926 | 0.740996 | 0.459576 | 0.581157 | -6.84075 |
| THNSL1    | 0.25962  | 2.937234 | 0.740802 | 0.459694 | 0.581252 | -6.32253 |
| CRMP1     | -0.34045 | 2.922986 | -0.74029 | 0.460005 | 0.581593 | -6.4424  |
| SILV      | 0.250653 | 0.621129 | 0.740094 | 0.460122 | 0.581689 | -5.92224 |
| INE1      | -0.19527 | 0.2207   | -0.73999 | 0.460186 | 0.581717 | -5.92221 |
| TMEM163   | -0.46558 | 1.069937 | -0.73954 | 0.460456 | 0.582006 | -6.09681 |
| DOCK6     | 0.141801 | 6.542918 | 0.738975 | 0.4608   | 0.582388 | -6.85059 |
| USP13     | 0.22561  | 4.268083 | 0.738865 | 0.460867 | 0.58242  | -6.62631 |
| PMS2L4    | -0.1623  | 0.074862 | -0.73867 | 0.460982 | 0.582485 | -5.89813 |
| GALNT14   | 0.777249 | 1.933116 | 0.738612 | 0.46102  | 0.582485 | -6.06212 |
| RRBP1     | -0.18106 | 8.471475 | -0.73856 | 0.46105  | 0.582485 | -6.80756 |
| AEBP1     | -0.33962 | 7.484185 | -0.7385  | 0.461086 | 0.582485 | -6.83474 |
| NTAN1     | -0.16154 | 4.085309 | -0.73826 | 0.461236 | 0.582622 | -6.65594 |
| OGFRL1    | -0.26705 | 3.70924  | -0.738   | 0.461393 | 0.582716 | -6.60383 |
| NOMO2     | 0.173124 | 6.709132 | 0.738051 | 0.46136  | 0.582716 | -6.85303 |
| LIPT1     | -0.13321 | 2.087581 | -0.7379  | 0.461449 | 0.582733 | -6.22561 |
| XRCC1     | 0.122674 | 5.00382  | 0.736882 | 0.462069 | 0.583464 | -6.7496  |
| NSUN6     | -0.12583 | 2.89645  | -0.73669 | 0.462183 | 0.583555 | -6.38908 |
| JMJD6     | -0.12249 | 4.592738 | -0.73626 | 0.462447 | 0.583795 | -6.72699 |
| JRK       | -0.1631  | 4.693654 | -0.73624 | 0.462457 | 0.583795 | -6.74322 |
| SLC7A6OS  | 0.136649 | 2.971019 | 0.735656 | 0.462813 | 0.584192 | -6.35655 |
| DHRS1     | -0.21409 | 4.077748 | -0.73555 | 0.462879 | 0.584222 | -6.66446 |
| VPS45     | -0.09793 | 5.125816 | -0.73545 | 0.462936 | 0.584241 | -6.7851  |
| COPB1     | 0.093024 | 7.419291 | 0.735205 | 0.463087 | 0.58438  | -6.84727 |
| FMNL1     | 0.245275 | 4.406609 | 0.734677 | 0.463408 | 0.584732 | -6.65122 |
| RNF19A    | -0.16274 | 6.320704 | -0.73432 | 0.463625 | 0.584953 | -6.85487 |
| AP4B1     | -0.14924 | 3.945547 | -0.73407 | 0.463777 | 0.585092 | -6.62919 |
| LRR8C     | 0.229211 | 5.019437 | 0.733938 | 0.463857 | 0.585137 | -6.74249 |
| FAM128B   | 0.150512 | 5.913151 | 0.733873 | 0.463897 | 0.585137 | -6.83105 |

|           |          |          |          |          |          |          |
|-----------|----------|----------|----------|----------|----------|----------|
| ARHGAP32  | 0.21187  | 6.933213 | 0.733208 | 0.464301 | 0.585594 | -6.85712 |
| KRTDAP    | 1.435237 | 0.702784 | 0.732943 | 0.464462 | 0.585692 | -5.79703 |
| HINT1     | 0.129956 | 6.841582 | 0.732979 | 0.464441 | 0.585692 | -6.85738 |
| CYorf15B  | 0.779463 | 0.555234 | 0.731856 | 0.465124 | 0.586474 | -5.85556 |
| IRX3      | -0.52006 | 3.128717 | -0.73172 | 0.46521  | 0.586528 | -6.52399 |
| ENO2      | 0.335021 | 4.459128 | 0.73136  | 0.465426 | 0.586749 | -6.64976 |
| LY96      | 0.304133 | 1.60746  | 0.731164 | 0.465546 | 0.586846 | -6.08213 |
| HSPA7     | -0.43661 | 1.525966 | -0.73065 | 0.465858 | 0.587187 | -6.18327 |
| HERC6     | 0.293857 | 5.077454 | 0.730408 | 0.466007 | 0.587322 | -6.74547 |
| FAM120C   | -0.2078  | 3.701507 | -0.73031 | 0.466064 | 0.587341 | -6.59667 |
| GRPEL1    | -0.1239  | 4.7641   | -0.73021 | 0.466128 | 0.587368 | -6.75215 |
| STK25     | -0.09974 | 6.343946 | -0.7299  | 0.466317 | 0.587553 | -6.85759 |
| LOC389333 | -0.18905 | 2.091981 | -0.72977 | 0.466398 | 0.587603 | -6.24295 |
| HS3ST3B1  | -0.30876 | 0.334268 | -0.72951 | 0.466557 | 0.58775  | -5.96574 |
| NDUFAF3   | -0.1347  | 4.766117 | -0.72926 | 0.466704 | 0.587883 | -6.7542  |
| ESF1      | 0.144586 | 5.184432 | 0.729137 | 0.466782 | 0.587927 | -6.77342 |
| GALNTL4   | 0.327571 | 3.825211 | 0.72876  | 0.467012 | 0.588164 | -6.51955 |
| STAT4     | 0.334176 | 1.272188 | 0.728043 | 0.46745  | 0.588621 | -6.02311 |
| TSR1      | 0.112807 | 6.050082 | 0.728028 | 0.467459 | 0.588621 | -6.84425 |
| KCNK10    | -0.53098 | 0.671635 | -0.72765 | 0.467693 | 0.588703 | -6.04741 |
| AFAP1L1   | 0.255428 | 3.438279 | 0.727837 | 0.467576 | 0.588703 | -6.44518 |
| HAUS3     | -0.09982 | 4.106611 | -0.72767 | 0.467676 | 0.588703 | -6.65691 |
| ZBTB11    | 0.115086 | 5.667127 | 0.727779 | 0.467611 | 0.588703 | -6.82121 |
| TRIO      | 0.182399 | 6.953205 | 0.727403 | 0.467841 | 0.588837 | -6.86112 |
| NDUFA12   | 0.115976 | 5.163389 | 0.727288 | 0.467911 | 0.588872 | -6.77512 |
| TBX2      | -0.22705 | 3.986235 | -0.72671 | 0.468265 | 0.589211 | -6.65664 |
| PPIE      | 0.150763 | 4.747324 | 0.726776 | 0.468224 | 0.589211 | -6.72232 |
| SRGN      | -0.28042 | 5.507024 | -0.72577 | 0.468839 | 0.58988  | -6.83582 |
| RNF216    | 0.099968 | 5.885572 | 0.725086 | 0.469258 | 0.590354 | -6.83854 |
| MANEA     | -0.14076 | 5.03791  | -0.72485 | 0.4694   | 0.590479 | -6.78753 |
| MLEC      | -0.19312 | 7.999684 | -0.72472 | 0.469481 | 0.590529 | -6.83345 |
| GLIS2     | -0.23614 | 4.67573  | -0.72439 | 0.469681 | 0.590727 | -6.7586  |
| ACE2      | 0.600235 | 1.551019 | 0.72378  | 0.470058 | 0.591147 | -6.03058 |
| ATG3      | 0.099364 | 5.608804 | 0.72295  | 0.470566 | 0.591734 | -6.82126 |
| MBOAT7    | 0.130688 | 6.545515 | 0.722685 | 0.470729 | 0.591884 | -6.86267 |
| UFC1      | -0.14155 | 5.723201 | -0.72205 | 0.471116 | 0.592319 | -6.84346 |
| RASL10B   | -0.38393 | 0.464291 | -0.72177 | 0.47129  | 0.592483 | -6.00135 |
| MAP1LC3B2 | -0.10925 | 4.147147 | -0.72156 | 0.471416 | 0.592589 | -6.67047 |
| TUBB1     | -0.23062 | 0.072412 | -0.72139 | 0.47152  | 0.592613 | -5.91852 |
| HBS1L     | -0.13632 | 5.573655 | -0.72143 | 0.4715   | 0.592613 | -6.83489 |
| CXCR6     | 0.34357  | 1.574441 | 0.72051  | 0.472063 | 0.593243 | -6.07539 |
| CCDC134   | 0.151195 | 1.910165 | 0.720141 | 0.47229  | 0.593474 | -6.16124 |
| MOSC1     | -0.28947 | 3.187707 | -0.7198  | 0.472496 | 0.593554 | -6.50375 |
| PLEKHM1P  | 0.183515 | 4.270776 | 0.719848 | 0.47247  | 0.593554 | -6.64566 |
| ZNF3      | 0.138778 | 5.101358 | 0.71976  | 0.472524 | 0.593554 | -6.77157 |
| TMOD3     | 0.147948 | 7.017145 | 0.719834 | 0.472478 | 0.593554 | -6.86584 |
| ZNF93     | -0.35111 | 1.073761 | -0.71853 | 0.473279 | 0.594449 | -6.09796 |
| DRAM2     | -0.10827 | 4.979391 | -0.71832 | 0.473409 | 0.594559 | -6.78293 |
| ZMYM5     | -0.14119 | 3.804462 | -0.71813 | 0.473527 | 0.594654 | -6.6122  |
| CD69      | -0.33129 | 1.406529 | -0.71744 | 0.473953 | 0.595136 | -6.1535  |
| DNM1P35   | 0.215167 | 0.120988 | 0.717057 | 0.474186 | 0.595369 | -5.87122 |
| RAB13     | -0.12361 | 6.054994 | -0.717   | 0.474224 | 0.595369 | -6.86051 |
| MAP4K1    | 0.385709 | 1.570444 | 0.71661  | 0.474462 | 0.595613 | -6.07219 |
| HSD11B2   | 0.329965 | 4.249505 | 0.71647  | 0.474548 | 0.595668 | -6.61266 |
| SLC22A15  | -0.22738 | 2.870325 | -0.71588 | 0.474912 | 0.596072 | -6.41873 |
| PPP2R2C   | 1.018065 | 2.969634 | 0.715662 | 0.475045 | 0.596078 | -6.22215 |
| D4S234E   | -0.41399 | 2.684966 | -0.71573 | 0.475003 | 0.596078 | -6.41752 |
| RIPK4     | 0.260858 | 5.702662 | 0.715737 | 0.474999 | 0.596078 | -6.82199 |

|            |          |          |          |          |          |          |
|------------|----------|----------|----------|----------|----------|----------|
| RNF157     | 0.485416 | 2.223128 | 0.715314 | 0.47526  | 0.596146 | -6.16704 |
| RTN4IP1    | -0.13206 | 2.833931 | -0.71536 | 0.47523  | 0.596146 | -6.39113 |
| DMKN       | 0.618339 | 4.914279 | 0.715286 | 0.475277 | 0.596146 | -6.69515 |
| DRG2       | 0.111505 | 4.801403 | 0.71542  | 0.475195 | 0.596146 | -6.74184 |
| C12orf44   | -0.0995  | 4.882444 | -0.71523 | 0.475312 | 0.596146 | -6.77386 |
| CLTC       | 0.103041 | 9.335429 | 0.715009 | 0.475448 | 0.596262 | -6.80303 |
| FAHD1      | 0.133419 | 4.663592 | 0.71489  | 0.475521 | 0.596301 | -6.72176 |
| SIRPB2     | 0.299978 | 0.08708  | 0.714776 | 0.475592 | 0.596336 | -5.85731 |
| CALML4     | 0.279104 | 4.635325 | 0.714525 | 0.475747 | 0.596476 | -6.69708 |
| GAPVD1     | -0.10308 | 6.371493 | -0.71433 | 0.475864 | 0.59657  | -6.86926 |
| LOC729176  | 0.160885 | 0.101266 | 0.714053 | 0.476038 | 0.596681 | -5.87759 |
| KCNH8      | -0.47266 | 0.565549 | -0.71406 | 0.476032 | 0.596681 | -6.03111 |
| PDGFRL     | -0.41645 | 0.456553 | -0.71384 | 0.47617  | 0.596793 | -6.00865 |
| CCDC84     | -0.14709 | 2.38979  | -0.71292 | 0.47674  | 0.597454 | -6.30396 |
| NCRNA00105 | -0.22534 | 1.255756 | -0.71267 | 0.476894 | 0.597593 | -6.11111 |
| ZDHHC24    | 0.118186 | 3.751816 | 0.71257  | 0.476953 | 0.597614 | -6.55151 |
| TRIM31     | 1.080114 | 1.547341 | 0.711923 | 0.477353 | 0.598061 | -5.96403 |
| PTPN22     | 0.328531 | 2.15994  | 0.711805 | 0.477426 | 0.598098 | -6.18439 |
| RAB11FIP4  | -0.2575  | 5.113248 | -0.71145 | 0.477647 | 0.598323 | -6.81329 |
| CUL1       | -0.10518 | 6.103688 | -0.71133 | 0.477718 | 0.598358 | -6.86557 |
| SMOX       | -0.20142 | 4.279237 | -0.71098 | 0.477937 | 0.598578 | -6.7107  |
| BCAT1      | 0.399492 | 4.662354 | 0.710284 | 0.478366 | 0.599008 | -6.68826 |
| HS2ST1     | 0.126938 | 5.755753 | 0.710347 | 0.478327 | 0.599008 | -6.83921 |
| SULT1E1    | 0.769042 | -0.03545 | 0.71     | 0.478542 | 0.599175 | -5.80718 |
| KLK13      | -0.76166 | 2.222222 | -0.70984 | 0.478643 | 0.599216 | -6.39277 |
| AQP3       | 0.529781 | 6.120032 | 0.709808 | 0.47866  | 0.599216 | -6.83969 |
| SCG5       | -0.34476 | 0.523074 | -0.70964 | 0.478766 | 0.599294 | -6.00855 |
| TMEM176B   | 0.335249 | 5.692337 | 0.709446 | 0.478885 | 0.599389 | -6.81995 |
| CP110      | 0.141751 | 4.755264 | 0.708797 | 0.479287 | 0.599838 | -6.73715 |
| ABO        | -0.48061 | 2.227339 | -0.70857 | 0.479425 | 0.599904 | -6.33093 |
| FLRT2      | -0.43471 | 3.285979 | -0.70862 | 0.479394 | 0.599904 | -6.5598  |
| SCO1       | -0.09633 | 4.187388 | -0.70836 | 0.479559 | 0.600018 | -6.68446 |
| SLC25A33   | 0.166529 | 3.261663 | 0.707895 | 0.479846 | 0.600323 | -6.43546 |
| UPK3B      | 0.563287 | 1.546571 | 0.706904 | 0.48046  | 0.600929 | -6.04768 |
| C10orf25   | -0.21971 | 0.950539 | -0.70696 | 0.480422 | 0.600929 | -6.06439 |
| RPLP2      | 0.165314 | 8.741089 | 0.706971 | 0.480418 | 0.600929 | -6.83172 |
| TM2D2      | 0.128616 | 5.058342 | 0.706525 | 0.480695 | 0.60117  | -6.77694 |
| TCF7L2     | 0.193295 | 5.482075 | 0.706222 | 0.480882 | 0.601351 | -6.81453 |
| TMCC3      | -0.24585 | 4.585603 | -0.70592 | 0.481067 | 0.601528 | -6.76005 |
| ENAH       | -0.20114 | 7.502252 | -0.70575 | 0.481178 | 0.601613 | -6.86087 |
| ZNF581     | 0.138303 | 3.924019 | 0.705176 | 0.481532 | 0.601994 | -6.59292 |
| ARMC7      | 0.147089 | 4.084222 | 0.705115 | 0.48157  | 0.601994 | -6.62364 |
| C20orf134  | 0.245886 | 1.448343 | 0.704645 | 0.481862 | 0.602305 | -6.0788  |
| ERICH1     | -0.15678 | 4.029379 | -0.70447 | 0.48197  | 0.602387 | -6.66779 |
| GNE        | -0.24855 | 5.06873  | -0.70433 | 0.482059 | 0.602444 | -6.81465 |
| RLIM       | 0.104533 | 6.643773 | 0.704132 | 0.48218  | 0.602542 | -6.8774  |
| KIFAP3     | 0.162609 | 5.037079 | 0.703888 | 0.482332 | 0.602624 | -6.77366 |
| POLR2A     | 0.119611 | 8.185898 | 0.703943 | 0.482298 | 0.602624 | -6.85118 |
| C12orf4    | 0.12309  | 4.202694 | 0.703699 | 0.482449 | 0.602716 | -6.65519 |
| DENND4B    | 0.100502 | 5.94289  | 0.703253 | 0.482726 | 0.603009 | -6.85704 |
| CSTA       | 0.843012 | 4.96586  | 0.702526 | 0.483179 | 0.60352  | -6.67911 |
| GPR37      | -0.40045 | 0.701164 | -0.70236 | 0.48328  | 0.603592 | -6.05634 |
| RAB2B      | -0.11914 | 4.601317 | -0.70212 | 0.483428 | 0.603723 | -6.75221 |
| ZNF674     | -0.13429 | 1.616791 | -0.70183 | 0.483611 | 0.603898 | -6.16854 |
| PTS        | -0.14143 | 3.630026 | -0.70129 | 0.48395  | 0.604267 | -6.58478 |
| EPB41L2    | -0.23544 | 5.805944 | -0.70097 | 0.484146 | 0.604458 | -6.86625 |
| COL8A1     | 0.442173 | 3.688016 | 0.700536 | 0.484417 | 0.604742 | -6.48597 |
| CMTM8      | -0.24905 | 3.074963 | -0.70043 | 0.484485 | 0.604773 | -6.47683 |

|              |          |          |          |          |          |          |
|--------------|----------|----------|----------|----------|----------|----------|
| CDHR1        | 0.888433 | 1.231052 | 0.700235 | 0.484605 | 0.604843 | -5.96026 |
| PDP2         | -0.13201 | 3.323479 | -0.7002  | 0.484628 | 0.604843 | -6.51413 |
| C19orf50     | 0.099569 | 5.999875 | 0.699871 | 0.484832 | 0.605043 | -6.86237 |
| TTC30A       | 0.208805 | 3.303003 | 0.699618 | 0.484989 | 0.605186 | -6.4411  |
| FLJ36031     | -0.18    | 4.452662 | -0.69951 | 0.485056 | 0.605215 | -6.74191 |
| MCTS1        | 0.096954 | 5.458472 | 0.699434 | 0.485104 | 0.605222 | -6.8253  |
| PGBD3        | 0.1455   | 2.295097 | 0.699057 | 0.485339 | 0.605435 | -6.24664 |
| CDKAL1       | 0.163103 | 4.021291 | 0.69902  | 0.485362 | 0.605435 | -6.61236 |
| DCTN6        | -0.11694 | 4.55719  | -0.69883 | 0.485483 | 0.605531 | -6.74801 |
| HGF          | -0.40639 | 0.61271  | -0.69845 | 0.485715 | 0.605713 | -6.04377 |
| MIB1         | -0.134   | 6.598982 | -0.6985  | 0.485686 | 0.605713 | -6.88204 |
| NGFRAP1      | -0.35944 | 4.695007 | -0.6977  | 0.486184 | 0.606244 | -6.79235 |
| LOC100134229 | 0.252033 | 3.064768 | 0.69745  | 0.486342 | 0.606332 | -6.37826 |
| MID1         | 0.179503 | 5.375018 | 0.697495 | 0.486314 | 0.606332 | -6.8124  |
| RANGRF       | -0.14059 | 3.375403 | -0.69732 | 0.48642  | 0.606376 | -6.53035 |
| ANGEL2       | -0.11058 | 4.657427 | -0.69711 | 0.486551 | 0.606485 | -6.76143 |
| EHD1         | -0.15506 | 6.494352 | -0.69699 | 0.486629 | 0.606529 | -6.88296 |
| CRB3         | 0.275101 | 3.908905 | 0.696895 | 0.486688 | 0.606548 | -6.55995 |
| MLL5         | -0.1294  | 7.090735 | -0.69665 | 0.486843 | 0.606687 | -6.87732 |
| ZNF26        | 0.141026 | 3.597689 | 0.695832 | 0.487352 | 0.607159 | -6.52526 |
| PLS1         | 0.455308 | 5.729916 | 0.695884 | 0.48732  | 0.607159 | -6.82212 |
| CXCL14       | 0.541502 | 6.604441 | 0.695906 | 0.487306 | 0.607159 | -6.87335 |
| HEG1         | -0.23738 | 6.327628 | -0.69573 | 0.487414 | 0.607182 | -6.88319 |
| SS18         | -0.12274 | 6.239246 | -0.69462 | 0.48811  | 0.607995 | -6.88106 |
| FBXO27       | -0.46962 | 2.713783 | -0.69451 | 0.488178 | 0.608025 | -6.45522 |
| SCYL2        | -0.10121 | 6.23026  | -0.69423 | 0.488353 | 0.608189 | -6.88072 |
| FBXL14       | -0.1628  | 5.186937 | -0.6936  | 0.488751 | 0.60863  | -6.82562 |
| TMEM176A     | 0.383289 | 4.96777  | 0.693483 | 0.488822 | 0.608664 | -6.74623 |
| FSD1L        | 0.247207 | 2.029895 | 0.693402 | 0.488872 | 0.608672 | -6.18593 |
| YOD1         | -0.20399 | 5.357024 | -0.69328 | 0.48895  | 0.608715 | -6.84372 |
| IL3RA        | -0.20757 | 1.686794 | -0.69294 | 0.48916  | 0.608814 | -6.20007 |
| UBIAD1       | 0.105764 | 4.669193 | 0.692999 | 0.489124 | 0.608814 | -6.74074 |
| SKIV2L       | 0.09763  | 5.631241 | 0.692972 | 0.489142 | 0.608814 | -6.84424 |
| PPPDE1       | 0.10708  | 6.354618 | 0.692868 | 0.489207 | 0.608818 | -6.8801  |
| EGR2         | 0.405365 | 2.997048 | 0.692331 | 0.489543 | 0.609182 | -6.34764 |
| NUAK1        | 0.251497 | 4.388329 | 0.691917 | 0.489802 | 0.60945  | -6.67786 |
| CPD          | -0.17995 | 7.511056 | -0.69184 | 0.489851 | 0.609456 | -6.87076 |
| HIVEP3       | 0.271046 | 4.122413 | 0.691564 | 0.490023 | 0.609617 | -6.6226  |
| TIAM2        | -0.26111 | 2.445391 | -0.69121 | 0.490247 | 0.609794 | -6.34829 |
| LOC654433    | 0.474366 | 3.348364 | 0.691198 | 0.490253 | 0.609794 | -6.40116 |
| IKZF2        | -0.29308 | 3.989055 | -0.69109 | 0.490324 | 0.609828 | -6.69429 |
| ERLIN1       | 0.121012 | 5.825581 | 0.690652 | 0.490596 | 0.610111 | -6.85789 |
| MXN1         | 0.580569 | 0.26539  | 0.690508 | 0.490686 | 0.610169 | -5.85921 |
| C16orf46     | 0.159924 | 0.862715 | 0.690354 | 0.490782 | 0.61018  | -6.00713 |
| TMCC2        | 0.372419 | 1.889393 | 0.690358 | 0.49078  | 0.61018  | -6.14875 |
| MSI1         | -0.51175 | 1.074818 | -0.69021 | 0.490874 | 0.61024  | -6.13956 |
| TSPAN33      | 0.258858 | 3.405656 | 0.689922 | 0.491053 | 0.610355 | -6.46268 |
| PL-5283      | 0.156892 | 5.958759 | 0.68998  | 0.491017 | 0.610355 | -6.8645  |
| SPATA24      | 0.133624 | 0.208048 | 0.689827 | 0.491113 | 0.610374 | -5.91267 |
| HDGFRP3      | -0.33823 | 4.242712 | -0.68973 | 0.491172 | 0.610394 | -6.74172 |
| BNIP1        | 0.112315 | 2.686267 | 0.68886  | 0.49172  | 0.611021 | -6.33303 |
| ACBD5        | 0.163802 | 5.546432 | 0.688514 | 0.491937 | 0.611236 | -6.8351  |
| CLPB         | 0.164194 | 4.950918 | 0.688359 | 0.492035 | 0.611271 | -6.77328 |
| TMEM214      | -0.09785 | 7.220323 | -0.68833 | 0.492053 | 0.611271 | -6.88109 |
| CXCL2        | 0.47304  | 3.135903 | 0.688202 | 0.492134 | 0.6113   | -6.36064 |
| CASD1        | -0.14277 | 4.249922 | -0.68815 | 0.492164 | 0.6113   | -6.71633 |
| CCDC112      | -0.14913 | 3.092648 | -0.68773 | 0.492429 | 0.611575 | -6.47112 |
| BRPF1        | -0.10278 | 4.836337 | -0.68717 | 0.492782 | 0.611959 | -6.78883 |

|          |          |          |          |          |          |          |
|----------|----------|----------|----------|----------|----------|----------|
| MSH3     | -0.09677 | 4.419368 | -0.68682 | 0.493004 | 0.612181 | -6.73532 |
| SLC4A3   | -0.39092 | 2.500774 | -0.68664 | 0.493114 | 0.612263 | -6.3973  |
| ZNF576   | 0.112028 | 2.806841 | 0.686439 | 0.493242 | 0.612367 | -6.36127 |
| C1orf144 | 0.081373 | 7.208385 | 0.686144 | 0.493427 | 0.612542 | -6.88581 |
| APCDD1   | -0.32312 | 4.639105 | -0.68589 | 0.493584 | 0.612683 | -6.78945 |
| PARVB    | -0.21143 | 3.970135 | -0.6858  | 0.493642 | 0.612701 | -6.68195 |
| COQ4     | -0.11242 | 4.992942 | -0.68564 | 0.493747 | 0.612777 | -6.80766 |
| RAB15    | 0.253236 | 4.710656 | 0.685547 | 0.493803 | 0.612791 | -6.73259 |
| ZNF391   | -0.28474 | 0.384281 | -0.68528 | 0.493968 | 0.612942 | -5.99816 |
| GNB4     | -0.27456 | 5.509145 | -0.68522 | 0.494012 | 0.612942 | -6.86426 |
| PHF8     | 0.110066 | 5.947094 | 0.684839 | 0.494249 | 0.613181 | -6.86957 |
| C1orf204 | -0.22052 | 0.236176 | -0.68418 | 0.494662 | 0.613589 | -5.96727 |
| THAP8    | 0.148689 | 2.149627 | 0.684177 | 0.494665 | 0.613589 | -6.2317  |
| BTB      | -0.30867 | 1.133788 | -0.68312 | 0.495332 | 0.614361 | -6.12654 |
| HCFC1R1  | 0.170158 | 4.75398  | 0.682351 | 0.495817 | 0.614908 | -6.75226 |
| ZDHHC8   | 0.145219 | 5.802944 | 0.681714 | 0.496219 | 0.615352 | -6.86125 |
| GOLIM4   | 0.187857 | 5.870817 | 0.681527 | 0.496337 | 0.615427 | -6.86319 |
| STEAP2   | -0.25958 | 5.55712  | -0.68148 | 0.496368 | 0.615427 | -6.86839 |
| RPS27A   | 0.141333 | 7.354327 | 0.681409 | 0.496411 | 0.615427 | -6.88733 |
| ZBTB41   | 0.141707 | 5.274376 | 0.681331 | 0.49646  | 0.615433 | -6.81646 |
| EBAG9    | -0.1157  | 4.540851 | -0.68111 | 0.496599 | 0.615496 | -6.75735 |
| AQR      | 0.09547  | 6.051888 | 0.681112 | 0.496599 | 0.615496 | -6.87785 |
| UGT1A6   | 0.874476 | 3.7309   | 0.680384 | 0.497058 | 0.61601  | -6.41515 |
| OST4     | 0.128674 | 6.91244  | 0.680054 | 0.497267 | 0.616214 | -6.89429 |
| AKR1C2   | -0.65719 | 5.241309 | -0.67975 | 0.497462 | 0.616401 | -6.87102 |
| TSPAN4   | -0.18352 | 3.570651 | -0.67936 | 0.497704 | 0.616646 | -6.59546 |
| PCNT     | -0.11321 | 5.909814 | -0.67914 | 0.497842 | 0.616762 | -6.88119 |
| PCDHGA4  | -0.31757 | 0.286049 | -0.67892 | 0.497984 | 0.61683  | -5.9936  |
| GTF2H2C  | -0.14561 | 3.84527  | -0.67896 | 0.497956 | 0.61683  | -6.64705 |
| MGST3    | -0.15541 | 5.596372 | -0.67883 | 0.498041 | 0.616846 | -6.867   |
| SLC12A6  | 0.185744 | 6.007855 | 0.678603 | 0.498184 | 0.616968 | -6.87346 |
| SMARCC1  | 0.102158 | 7.160448 | 0.678342 | 0.498349 | 0.617117 | -6.89221 |
| RHOH     | 0.317164 | 1.422304 | 0.678201 | 0.498439 | 0.617173 | -6.08322 |
| FAM131B  | -0.34795 | 0.208067 | -0.67764 | 0.49879  | 0.617539 | -5.98462 |
| TICAM2   | -0.29409 | 1.851232 | -0.67734 | 0.498985 | 0.617539 | -6.25018 |
| IFT74    | -0.20562 | 2.935611 | -0.67749 | 0.498891 | 0.617539 | -6.45875 |
| DAK      | 0.139307 | 5.240789 | 0.677363 | 0.498969 | 0.617539 | -6.81563 |
| ZNF410   | -0.08022 | 5.49332  | -0.67728 | 0.499023 | 0.617539 | -6.85661 |
| USP36    | -0.10109 | 6.026967 | -0.67724 | 0.499043 | 0.617539 | -6.88647 |
| NUS1     | -0.10124 | 6.297944 | -0.67755 | 0.498848 | 0.617539 | -6.89346 |
| NSUN4    | -0.07391 | 4.695043 | -0.67714 | 0.499108 | 0.617564 | -6.77554 |
| PPPDE2   | 0.142402 | 4.478349 | 0.676882 | 0.499273 | 0.617714 | -6.7192  |
| SUSD1    | -0.17863 | 3.78496  | -0.67664 | 0.499428 | 0.617851 | -6.63949 |
| SDCBP    | -0.12728 | 7.468212 | -0.67647 | 0.499533 | 0.617926 | -6.88334 |
| EI24     | 0.118897 | 6.812128 | 0.676298 | 0.499643 | 0.618008 | -6.8972  |
| CREB3L1  | -0.48728 | 6.089919 | -0.67614 | 0.499746 | 0.61808  | -6.89614 |
| FBXO4    | 0.143054 | 3.038699 | 0.675869 | 0.499915 | 0.618234 | -6.4119  |
| NUDT17   | 0.167248 | 0.482183 | 0.675737 | 0.499998 | 0.618283 | -5.95807 |
| SMC5     | -0.12727 | 5.877241 | -0.67548 | 0.500162 | 0.618431 | -6.88269 |
| TRAF1    | -0.20627 | 3.659344 | -0.67528 | 0.500288 | 0.618522 | -6.62296 |
| PODXL    | 0.247547 | 6.087431 | 0.675223 | 0.500324 | 0.618522 | -6.87675 |
| ALS2CL   | 0.274987 | 4.769493 | 0.674893 | 0.500533 | 0.618725 | -6.7463  |
| NIPAL1   | 0.316743 | 2.98139  | 0.67462  | 0.500707 | 0.618885 | -6.36261 |
| ZC3H11A  | 0.082433 | 7.577963 | 0.674309 | 0.500904 | 0.619073 | -6.8865  |
| ADAM19   | 0.249773 | 4.803151 | 0.674026 | 0.501083 | 0.619241 | -6.75589 |
| MAST1    | 0.368176 | 0.176973 | 0.673791 | 0.501232 | 0.619301 | -5.88974 |
| GATSL2   | -0.40795 | 0.234204 | -0.67374 | 0.501265 | 0.619301 | -6.0007  |
| CORO6    | -0.39735 | 0.732843 | -0.67385 | 0.501193 | 0.619301 | -6.08041 |

|          |       |          |          |          |          |          |          |
|----------|-------|----------|----------|----------|----------|----------|----------|
| LRRC59   |       | 0.1323   | 7.67435  | 0.673515 | 0.501407 | 0.619422 | -6.88584 |
| C2orf72  |       | -0.60968 | 1.75956  | -0.67314 | 0.501646 | 0.619662 | -6.27863 |
| ANGPTL2  |       | -0.24636 | 5.431285 | -0.67291 | 0.501793 | 0.619734 | -6.86599 |
| SRP72    |       | 0.085172 | 7.072955 | 0.672957 | 0.501761 | 0.619734 | -6.89696 |
| NR5A2    |       | 0.47274  | 1.957925 | 0.672731 | 0.501905 | 0.619818 | -6.1521  |
| SUGT1L1  |       | -0.2051  | 0.886814 | -0.67245 | 0.502086 | 0.619877 | -6.07355 |
| ACOT9    |       | 0.151368 | 4.550762 | 0.672583 | 0.501999 | 0.619877 | -6.73173 |
| BCL7B    |       | -0.09945 | 5.602826 | -0.67249 | 0.502055 | 0.619877 | -6.86868 |
| GCNT3    |       | 0.939044 | 3.8109   | 0.671986 | 0.502378 | 0.620183 | -6.41742 |
| C16orf48 |       | -0.16242 | 2.872729 | -0.67152 | 0.502675 | 0.620419 | -6.43855 |
| LRRC61   |       | 0.2243   | 3.829348 | 0.671555 | 0.502652 | 0.620419 | -6.57707 |
|          | 9-Sep | 0.108155 | 8.610541 | 0.671475 | 0.502703 | 0.620419 | -6.8589  |
| C6orf192 |       | -0.19891 | 4.298641 | -0.67126 | 0.502838 | 0.620532 | -6.74081 |
| TIAL1    |       | 0.059548 | 6.113934 | 0.670705 | 0.503192 | 0.620913 | -6.88883 |
| SERTAD4  |       | 0.403285 | 2.26653  | 0.670487 | 0.503331 | 0.62103  | -6.22262 |
| CTPS2    |       | -0.15056 | 4.420451 | -0.67028 | 0.503466 | 0.621141 | -6.75293 |
| CUL4B    |       | -0.09198 | 6.62046  | -0.67015 | 0.503544 | 0.621183 | -6.90139 |
| SPHK2    |       | -0.13166 | 4.080952 | -0.66985 | 0.503735 | 0.621338 | -6.69674 |
| TTC39C   |       | 0.182983 | 4.455726 | 0.669814 | 0.503759 | 0.621338 | -6.71472 |
| CLCA4    |       | 1.091802 | 1.347456 | 0.669614 | 0.503886 | 0.621404 | -5.97097 |
| SCAI     |       | -0.12522 | 4.059855 | -0.66938 | 0.504035 | 0.621404 | -6.69336 |
| KIAA1715 |       | 0.114885 | 5.420751 | 0.669505 | 0.503956 | 0.621404 | -6.84103 |
| SLC37A3  |       | -0.10923 | 5.260497 | -0.66942 | 0.504012 | 0.621404 | -6.84443 |
| LMTK2    |       | 0.17304  | 6.010874 | 0.669541 | 0.503933 | 0.621404 | -6.88019 |
| SELT     |       | 0.109019 | 6.500271 | 0.6692   | 0.50415  | 0.621491 | -6.8993  |
| FGD1     |       | -0.25766 | 4.048726 | -0.66892 | 0.504331 | 0.62166  | -6.71517 |
| C1orf50  |       | -0.10759 | 2.70925  | -0.66861 | 0.504523 | 0.621841 | -6.39311 |
| KIF9     |       | -0.20989 | 1.992332 | -0.66843 | 0.504637 | 0.621928 | -6.2676  |
| OLFM4    |       | 1.625432 | 3.391995 | 0.668127 | 0.504833 | 0.622113 | -6.21855 |
| PEX26    |       | -0.11015 | 4.5829   | -0.66782 | 0.505031 | 0.622303 | -6.77166 |
| TRIM5    |       | -0.13573 | 4.31534  | -0.66761 | 0.505163 | 0.62241  | -6.73809 |
| GXYLT1   |       | -0.13939 | 4.361779 | -0.66745 | 0.505262 | 0.622478 | -6.74564 |
| UGT1A10  |       | -0.75547 | 0.981055 | -0.667   | 0.505548 | 0.622776 | -6.1753  |
| N4BP2    |       | -0.15263 | 3.750896 | -0.66675 | 0.50571  | 0.62292  | -6.63747 |
| ZZZ3     |       | -0.09018 | 5.471236 | -0.66628 | 0.506011 | 0.623235 | -6.86291 |
| RPLP0    |       | 0.128199 | 9.55649  | 0.666097 | 0.506127 | 0.623323 | -6.82977 |
| ACRBP    |       | 0.341077 | 0.343729 | 0.665883 | 0.506263 | 0.623367 | -5.91799 |
| RND1     |       | -0.40153 | 1.650118 | -0.66587 | 0.506269 | 0.623367 | -6.23856 |
| WBP5     |       | -0.22633 | 5.612451 | -0.66583 | 0.506296 | 0.623367 | -6.88061 |
| VPS28    |       | -0.12949 | 5.874287 | -0.66567 | 0.506401 | 0.623441 | -6.88915 |
| MYNN     |       | 0.118384 | 4.662827 | 0.665396 | 0.506574 | 0.623545 | -6.75723 |
| SFRS11   |       | -0.09529 | 7.181581 | -0.6654  | 0.506569 | 0.623545 | -6.89737 |
| CDK19    |       | -0.1145  | 5.298396 | -0.66525 | 0.506669 | 0.623606 | -6.85123 |
| EXTL3    |       | -0.15168 | 6.324184 | -0.66473 | 0.507002 | 0.623961 | -6.90327 |
| C6orf57  |       | -0.13964 | 1.314479 | -0.66444 | 0.507182 | 0.624128 | -6.14142 |
| MEIS3    |       | -0.26475 | 1.588695 | -0.66434 | 0.507247 | 0.624153 | -6.21176 |
| STAG3L2  |       | 0.238025 | 2.334784 | 0.664262 | 0.507298 | 0.62416  | -6.26106 |
| PRKCDBP  |       | -0.22254 | 4.614039 | -0.664   | 0.507465 | 0.624311 | -6.791   |
| MDM1     |       | 0.169401 | 3.385374 | 0.663774 | 0.507609 | 0.624434 | -6.49387 |
| DHX58    |       | 0.182979 | 3.738239 | 0.663261 | 0.507937 | 0.624782 | -6.56959 |
| C10orf88 |       | 0.097034 | 3.171531 | 0.663154 | 0.508005 | 0.624811 | -6.458   |
| BCMO1    |       | 0.545003 | 0.000661 | 0.662776 | 0.508247 | 0.625053 | -5.84685 |
| ABP1     |       | 0.905209 | 3.500344 | 0.662505 | 0.50842  | 0.625211 | -6.36326 |
| ZBTB5    |       | -0.12515 | 4.97521  | -0.66205 | 0.508713 | 0.625516 | -6.8234  |
| FARP1    |       | -0.21353 | 6.00045  | -0.66186 | 0.508835 | 0.62561  | -6.89915 |
| ITPK1    |       | -0.15381 | 6.662149 | -0.66169 | 0.508939 | 0.625684 | -6.90661 |
| HARBI1   |       | -0.10868 | 1.709567 | -0.66146 | 0.509087 | 0.625775 | -6.20667 |
| TCEAL8   |       | -0.17243 | 4.471222 | -0.66144 | 0.509103 | 0.625775 | -6.76937 |



|           |          |          |          |          |          |          |
|-----------|----------|----------|----------|----------|----------|----------|
| MYH14     | 0.390958 | 8.231542 | 0.660852 | 0.509478 | 0.626181 | -6.88604 |
| FKBP9     | 0.136465 | 7.232877 | 0.660599 | 0.50964  | 0.626325 | -6.90335 |
| LOC145783 | -0.1837  | 0.483163 | -0.66007 | 0.509978 | 0.626685 | -6.01518 |
| DOCK4     | -0.18972 | 4.00504  | -0.65981 | 0.510146 | 0.626837 | -6.69978 |
| MBLAC1    | -0.15073 | 0.197087 | -0.65911 | 0.510591 | 0.627329 | -5.96896 |
| MBTD1     | -0.12227 | 4.859935 | -0.65884 | 0.510767 | 0.627489 | -6.8122  |
| NPR3      | -0.50535 | 0.186367 | -0.65863 | 0.510902 | 0.627524 | -6.01663 |
| SCAMP5    | -0.29854 | 3.343698 | -0.65858 | 0.510932 | 0.627524 | -6.57689 |
| EIF3CL    | -0.11849 | 8.96071  | -0.65846 | 0.511009 | 0.627524 | -6.84797 |
| MRPL20    | 0.114566 | 5.493537 | 0.658416 | 0.511038 | 0.627524 | -6.85501 |
| MGA       | -0.10559 | 6.027306 | -0.65851 | 0.51098  | 0.627524 | -6.89911 |
| AGR2      | -0.78508 | 6.170565 | -0.65837 | 0.511065 | 0.627524 | -6.9075  |
| CCBL1     | -0.17345 | 2.339469 | -0.65776 | 0.511456 | 0.627941 | -6.33514 |
| EPS15L1   | -0.08946 | 5.563488 | -0.6577  | 0.511494 | 0.627941 | -6.87532 |
| NDUFB11   | -0.13858 | 5.763489 | -0.65752 | 0.511614 | 0.628033 | -6.88975 |
| ZNF740    | -0.10651 | 4.349191 | -0.65745 | 0.51166  | 0.628034 | -6.7467  |
| TMEM18    | -0.10343 | 4.274623 | -0.65691 | 0.512007 | 0.628405 | -6.73456 |
| XIAP      | 0.111644 | 6.373797 | 0.656434 | 0.51231  | 0.628721 | -6.90497 |
| NIPAL4    | 0.782915 | 2.392801 | 0.656357 | 0.512359 | 0.628726 | -6.19733 |
| HNF1A     | -0.50118 | 2.302644 | -0.65614 | 0.512501 | 0.628845 | -6.37757 |
| TRIM26    | 0.100268 | 6.029563 | 0.655537 | 0.512885 | 0.629262 | -6.89368 |
| OSBPL6    | -0.4381  | 1.539992 | -0.65529 | 0.513045 | 0.629402 | -6.23784 |
| RPP30     | 0.106527 | 4.234049 | 0.654699 | 0.513423 | 0.629811 | -6.69681 |
| RASAL1    | 0.451602 | 3.427372 | 0.65446  | 0.513577 | 0.62989  | -6.44384 |
| FBXL18    | 0.145494 | 5.285271 | 0.654515 | 0.513542 | 0.62989  | -6.83529 |
| AKR1A1    | -0.11307 | 6.161525 | -0.65426 | 0.513708 | 0.629995 | -6.90611 |
| ZNF81     | 0.146836 | 3.23762  | 0.654161 | 0.513769 | 0.630015 | -6.46977 |
| BCS1L     | 0.10457  | 3.93168  | 0.653698 | 0.514067 | 0.630324 | -6.63477 |
| PEX14     | 0.11159  | 4.313248 | 0.653227 | 0.51437  | 0.630641 | -6.71147 |
| EP400     | 0.091969 | 6.934441 | 0.653102 | 0.51445  | 0.630684 | -6.91183 |
| C8orf83   | -0.17121 | 4.852319 | -0.65277 | 0.514666 | 0.630892 | -6.8201  |
| BDKRB2    | -0.22936 | 4.818764 | -0.65252 | 0.514824 | 0.630995 | -6.82261 |
| TNPO2     | -0.0988  | 6.502078 | -0.6525  | 0.51484  | 0.630995 | -6.9127  |
| ETHE1     | 0.219791 | 4.966699 | 0.652242 | 0.515004 | 0.63114  | -6.79279 |
| LOC727896 | -0.20028 | 0.370791 | -0.65188 | 0.515238 | 0.631372 | -6.00366 |
| CUL7      | -0.14998 | 5.735677 | -0.65178 | 0.515302 | 0.631395 | -6.89261 |
| PLEKHA1   | 0.119137 | 6.51701  | 0.651695 | 0.515356 | 0.631406 | -6.91097 |
| SLC30A6   | 0.109212 | 4.542734 | 0.651547 | 0.515451 | 0.631467 | -6.75011 |
| PRKCH     | 0.16449  | 5.110386 | 0.651343 | 0.515582 | 0.631573 | -6.81717 |
| SLC7A4    | -0.4825  | -0.13901 | -0.65125 | 0.515643 | 0.631591 | -5.96831 |
| CLIC5     | -0.44938 | 2.166512 | -0.6511  | 0.515737 | 0.631611 | -6.35357 |
| SEMA3F    | 0.205892 | 6.405712 | 0.651083 | 0.51575  | 0.631611 | -6.9071  |
| ZNF770    | 0.146959 | 5.85469  | 0.650975 | 0.515819 | 0.631642 | -6.88494 |
| TRO       | -0.28402 | 1.541554 | -0.6508  | 0.515933 | 0.631725 | -6.21363 |
| RPL31     | 0.133286 | 8.299539 | 0.650459 | 0.516152 | 0.631938 | -6.88406 |
| GPR4      | 0.228389 | 2.938578 | 0.649208 | 0.516958 | 0.632759 | -6.39093 |
| PACRGL    | -0.1161  | 2.764325 | -0.64927 | 0.516916 | 0.632759 | -6.41979 |
| RNF207    | 0.252234 | 3.515987 | 0.649248 | 0.516933 | 0.632759 | -6.51454 |
| COX6A1    | -0.11975 | 6.508513 | -0.64885 | 0.517186 | 0.632982 | -6.91519 |
| A2ML1     | 1.36342  | 3.173631 | 0.648574 | 0.517368 | 0.633093 | -6.24527 |
| C2orf56   | 0.080691 | 3.405127 | 0.648584 | 0.517361 | 0.633093 | -6.52467 |
| TMEM119   | -0.2736  | 2.815117 | -0.64819 | 0.517613 | 0.633216 | -6.46248 |
| ZNF480    | -0.17405 | 4.337641 | -0.64828 | 0.517557 | 0.633216 | -6.75936 |
| SLC45A4   | -0.19346 | 5.233183 | -0.64822 | 0.517593 | 0.633216 | -6.86203 |
| TAF1C     | -0.08909 | 5.418099 | -0.64814 | 0.517649 | 0.633216 | -6.87054 |
| SHMT1     | 0.154709 | 5.107789 | 0.647836 | 0.517844 | 0.633399 | -6.82008 |
| DYRK1B    | -0.18058 | 4.490173 | -0.64658 | 0.518656 | 0.634281 | -6.78196 |
| C6orf48   | 0.149291 | 5.351955 | 0.646631 | 0.518622 | 0.634281 | -6.84667 |

|          |          |          |          |          |          |          |
|----------|----------|----------|----------|----------|----------|----------|
| SORL1    | 0.252022 | 6.401418 | 0.646364 | 0.518795 | 0.634395 | -6.90873 |
| ZNHIT2   | -0.57893 | 1.257513 | -0.64618 | 0.518912 | 0.634484 | -6.21089 |
| VAMP5    | -0.18831 | 3.112693 | -0.64604 | 0.519002 | 0.634526 | -6.5178  |
| XPO4     | 0.122931 | 5.733995 | 0.645988 | 0.519038 | 0.634526 | -6.88141 |
| TPK1     | -0.27056 | 1.690403 | -0.64536 | 0.519446 | 0.634858 | -6.23835 |
| ISCA2    | 0.100516 | 3.379339 | 0.645487 | 0.519361 | 0.634858 | -6.51426 |
| RNF31    | 0.08642  | 5.770964 | 0.645411 | 0.51941  | 0.634858 | -6.8866  |
| C19orf26 | 0.342557 | 0.823846 | 0.644003 | 0.520321 | 0.635816 | -6.00719 |
| PFKFB3   | -0.16067 | 6.471532 | -0.64404 | 0.5203   | 0.635816 | -6.91828 |
| RABGGTB  | 0.098876 | 5.110147 | 0.643898 | 0.520389 | 0.635844 | -6.82786 |
| NFS1     | 0.105295 | 4.754094 | 0.643801 | 0.520451 | 0.635865 | -6.78461 |
| FHL3     | 0.180252 | 4.520608 | 0.643435 | 0.520689 | 0.636099 | -6.74418 |
| ZNF394   | 0.122245 | 4.559268 | 0.643083 | 0.520917 | 0.636322 | -6.7567  |
| TRPM6    | 0.434935 | 0.087488 | 0.642664 | 0.521187 | 0.636597 | -5.88848 |
| PAQR6    | -0.24274 | 1.025316 | -0.6424  | 0.521357 | 0.636638 | -6.12318 |
| DMWD     | -0.09055 | 5.531356 | -0.64248 | 0.521307 | 0.636638 | -6.88296 |
| RAB2A    | -0.0858  | 5.940635 | -0.64246 | 0.521318 | 0.636638 | -6.90553 |
| MCOLN3   | -0.3951  | 1.88746  | -0.64206 | 0.521582 | 0.636856 | -6.29501 |
| GTF2H2B  | 0.273456 | 1.383758 | 0.64189  | 0.521689 | 0.636931 | -6.10469 |
| RND3     | -0.20294 | 5.89999  | -0.6412  | 0.522136 | 0.637422 | -6.90897 |
| TSEN2    | -0.12818 | 3.025943 | -0.64073 | 0.522444 | 0.637742 | -6.4854  |
| C17orf56 | 0.097124 | 4.490239 | 0.640539 | 0.522565 | 0.637833 | -6.75023 |
| DDX51    | -0.09489 | 4.436442 | -0.64043 | 0.522636 | 0.637865 | -6.76843 |
| NXF1     | -0.07194 | 6.275682 | -0.64031 | 0.52271  | 0.637899 | -6.917   |
| TRIM32   | 0.121531 | 4.22262  | 0.640157 | 0.522812 | 0.637968 | -6.70172 |
| DGCR11   | -0.13718 | 1.190119 | -0.63953 | 0.523219 | 0.638408 | -6.13626 |
| XAB2     | -0.09058 | 5.837628 | -0.63904 | 0.523539 | 0.638743 | -6.90334 |
| PRNP     | 0.251426 | 7.412256 | 0.638941 | 0.523602 | 0.638764 | -6.916   |
| PCYT1A   | 0.169684 | 5.137927 | 0.638547 | 0.523858 | 0.63902  | -6.82752 |
| PION     | -0.18033 | 4.030024 | -0.63813 | 0.524126 | 0.639292 | -6.71538 |
| PSMD6    | -0.0876  | 5.437817 | -0.6379  | 0.524278 | 0.639422 | -6.87866 |
| C20orf46 | 0.329765 | 0.92936  | 0.636567 | 0.525144 | 0.640422 | -6.02552 |
| C1orf52  | -0.08428 | 3.759809 | -0.63641 | 0.525246 | 0.64049  | -6.64572 |
| LAMC1    | -0.1685  | 8.149867 | -0.63607 | 0.52547  | 0.640697 | -6.88945 |
| KRT8     | 0.444436 | 8.623975 | 0.636009 | 0.525507 | 0.640697 | -6.89159 |
| WDR83    | 0.106417 | 2.336357 | 0.635563 | 0.525797 | 0.640994 | -6.30201 |
| SMARCA5  | 0.094695 | 6.864793 | 0.635386 | 0.525912 | 0.641079 | -6.92369 |
| DHCR24   | -0.20685 | 8.603041 | -0.63523 | 0.526014 | 0.641147 | -6.87275 |
| NUDCD3   | -0.09228 | 6.662711 | -0.63498 | 0.526175 | 0.641288 | -6.92417 |
| NDFIP2   | 0.154752 | 6.437348 | 0.634592 | 0.526429 | 0.641541 | -6.91962 |
| AKT2     | -0.08612 | 6.566486 | -0.63448 | 0.526503 | 0.641576 | -6.92447 |
| FKBPL    | 0.140159 | 2.36702  | 0.63402  | 0.526802 | 0.641883 | -6.303   |
| WDR27    | 0.132748 | 3.27174  | 0.633635 | 0.527052 | 0.642132 | -6.49139 |
| PCMT1    | -0.08994 | 5.798991 | -0.63354 | 0.527117 | 0.642155 | -6.90484 |
| KDM2A    | 0.095213 | 7.726331 | 0.633335 | 0.527248 | 0.642259 | -6.91011 |
| TTC35    | 0.097939 | 5.001954 | 0.632495 | 0.527795 | 0.642869 | -6.823   |
| AFAP1    | -0.13036 | 6.160021 | -0.63218 | 0.528001 | 0.643064 | -6.92067 |
| C6orf162 | 0.147185 | 2.17499  | 0.631995 | 0.528121 | 0.643154 | -6.26878 |
| BCAP29   | -0.12024 | 5.694485 | -0.63156 | 0.528406 | 0.643445 | -6.90203 |
| SQRDL    | 0.181223 | 6.13761  | 0.63062  | 0.529018 | 0.644134 | -6.91127 |
| C8orf44  | 0.155816 | 0.854939 | 0.630201 | 0.529292 | 0.644355 | -6.04436 |
| SPRR1A   | 1.290838 | 3.445136 | 0.630259 | 0.529254 | 0.644355 | -6.31498 |
| SP2      | -0.06852 | 5.717514 | -0.62914 | 0.529982 | 0.645083 | -6.90216 |
| GTF2F1   | -0.07299 | 6.18871  | -0.62919 | 0.529955 | 0.645083 | -6.92194 |
| TMEM186  | 0.119761 | 2.758777 | 0.628575 | 0.530354 | 0.645479 | -6.38687 |
| LRIG3    | -0.16561 | 5.653627 | -0.6281  | 0.530666 | 0.645803 | -6.90405 |
| CD84     | 0.328916 | 1.385633 | 0.627619 | 0.530979 | 0.646018 | -6.10779 |
| RGPD5    | -0.2246  | 2.480648 | -0.62773 | 0.530907 | 0.646018 | -6.39128 |

|          |          |          |          |          |          |          |
|----------|----------|----------|----------|----------|----------|----------|
| YME1L1   | 0.081002 | 7.280981 | 0.627615 | 0.530981 | 0.646018 | -6.92278 |
| OR2A4    | 0.343585 | 0.713383 | 0.6269   | 0.531449 | 0.646531 | -5.99782 |
| BBS10    | -0.13371 | 3.839941 | -0.62616 | 0.531931 | 0.64706  | -6.67997 |
| CCDC101  | -0.12189 | 3.411067 | -0.62565 | 0.532266 | 0.647412 | -6.58294 |
| RARS     | 0.083781 | 6.017668 | 0.62486  | 0.532784 | 0.647986 | -6.91341 |
| LRRC41   | -0.08906 | 6.456095 | -0.62419 | 0.533224 | 0.648464 | -6.93022 |
| CST7     | 0.286845 | 1.651897 | 0.624045 | 0.533319 | 0.648523 | -6.16192 |
| LANCL2   | 0.191321 | 4.954863 | 0.623954 | 0.533378 | 0.648539 | -6.81294 |
| FAM198B  | -0.23907 | 5.398202 | -0.6238  | 0.533477 | 0.648603 | -6.89442 |
| AGAP8    | 0.177821 | 1.691045 | 0.623618 | 0.533598 | 0.648637 | -6.18318 |
| PBX2     | -0.09191 | 5.420017 | -0.62364 | 0.533585 | 0.648637 | -6.88657 |
| EEF1G    | 0.1178   | 8.394222 | 0.623529 | 0.533657 | 0.648652 | -6.8976  |
| UTP3     | -0.08721 | 4.571682 | -0.62273 | 0.53418  | 0.649232 | -6.79709 |
| VRK3     | -0.10233 | 4.574662 | -0.62232 | 0.534452 | 0.649422 | -6.79848 |
| NCKAP5L  | -0.14829 | 4.997387 | -0.62228 | 0.534477 | 0.649422 | -6.85344 |
| C15orf24 | -0.08686 | 5.379482 | -0.62239 | 0.534401 | 0.649422 | -6.88337 |
| GOPC     | 0.093477 | 5.852677 | 0.6221   | 0.534594 | 0.649508 | -6.90595 |
| CASP7    | 0.134093 | 5.375393 | 0.622027 | 0.534642 | 0.64951  | -6.86502 |
| VASP     | 0.125499 | 6.810985 | 0.621895 | 0.534729 | 0.649559 | -6.93237 |
| TNIP2    | 0.100305 | 4.929591 | 0.621737 | 0.534832 | 0.649629 | -6.82104 |
| HVCN1    | -0.20055 | 1.876929 | -0.62165 | 0.534889 | 0.64964  | -6.27892 |
| LRRC40   | 0.093304 | 4.26526  | 0.621391 | 0.535059 | 0.649791 | -6.72654 |
| PDX1     | 0.837227 | 0.293448 | 0.620902 | 0.53538  | 0.650125 | -5.87397 |
| SFRS15   | -0.08443 | 5.850369 | -0.62083 | 0.535428 | 0.650126 | -6.91512 |
| MLLT10   | 0.097849 | 5.325696 | 0.620393 | 0.535714 | 0.650361 | -6.86516 |
| HLA-DPB1 | 0.291909 | 5.608886 | 0.620416 | 0.535699 | 0.650361 | -6.87565 |
| SNCAIP   | 0.399765 | 2.280842 | 0.620102 | 0.535906 | 0.650493 | -6.26036 |
| GABPB2   | -0.12894 | 3.115912 | -0.61994 | 0.53601  | 0.650493 | -6.5181  |
| SLC22A18 | 0.22994  | 4.494015 | 0.619988 | 0.535981 | 0.650493 | -6.74357 |
| AGPAT6   | -0.12243 | 6.116733 | -0.62006 | 0.535936 | 0.650493 | -6.92687 |
| CCDC91   | -0.16182 | 4.69436  | -0.61938 | 0.536381 | 0.650887 | -6.82235 |
| EIF4G2   | -0.08022 | 10.11281 | -0.61893 | 0.536679 | 0.651192 | -6.83432 |
| VPS35    | 0.078453 | 7.428773 | 0.618781 | 0.536774 | 0.651251 | -6.92535 |
| NUBP2    | 0.104653 | 4.843596 | 0.618501 | 0.536958 | 0.651418 | -6.81227 |
| C21orf59 | 0.105474 | 4.559732 | 0.617841 | 0.537392 | 0.651831 | -6.77464 |
| NFAT5    | -0.12224 | 7.248619 | -0.61785 | 0.537386 | 0.651831 | -6.92598 |
| OCLN     | -0.34655 | 4.449803 | -0.6175  | 0.537614 | 0.652043 | -6.81057 |
| EIF2A    | 0.102514 | 6.86156  | 0.617423 | 0.537667 | 0.652051 | -6.93497 |
| SHARPIN  | 0.115905 | 5.593491 | 0.617084 | 0.53789  | 0.652266 | -6.88928 |
| RAB36    | 0.239882 | 3.122516 | 0.616977 | 0.537961 | 0.652294 | -6.45182 |
| PPP1R16A | 0.145934 | 5.318372 | 0.616604 | 0.538207 | 0.652536 | -6.86184 |
| BTF3     | -0.1071  | 7.786102 | -0.61622 | 0.53846  | 0.652787 | -6.91468 |
| GTF2H2   | -0.22801 | 2.179768 | -0.61611 | 0.538534 | 0.652819 | -6.33959 |
| SLITRK6  | 0.553377 | 2.113215 | 0.615952 | 0.538636 | 0.652884 | -6.20703 |
| AKT1S1   | 0.094892 | 6.203362 | 0.615884 | 0.538681 | 0.652884 | -6.92607 |
| CD200R1  | 0.274823 | -0.07345 | 0.615759 | 0.538763 | 0.652927 | -5.90312 |
| ZNF232   | 0.148073 | 2.699145 | 0.615597 | 0.53887  | 0.652963 | -6.37673 |
| MDN1     | -0.10645 | 6.284044 | -0.61557 | 0.538886 | 0.652963 | -6.93323 |
| KIF12    | 0.666573 | 0.745543 | 0.615451 | 0.538965 | 0.653003 | -5.96049 |
| ADPRH    | -0.1685  | 2.910246 | -0.61458 | 0.53954  | 0.653585 | -6.48594 |
| CPSF3L   | -0.09049 | 6.147912 | -0.61459 | 0.539533 | 0.653585 | -6.93033 |
| CLIC2    | -0.20913 | 3.005789 | -0.61426 | 0.539748 | 0.653632 | -6.51546 |
| DLL4     | 0.233446 | 3.441809 | 0.614237 | 0.539766 | 0.653632 | -6.52361 |
| C9orf41  | 0.140601 | 3.531296 | 0.614305 | 0.539721 | 0.653632 | -6.56147 |
| TRIM35   | 0.132642 | 4.708068 | 0.614327 | 0.539706 | 0.653632 | -6.79425 |
| SENP2    | 0.113279 | 5.486216 | 0.613746 | 0.540089 | 0.653967 | -6.88267 |
| GPR89B   | -0.26942 | 1.132966 | -0.61348 | 0.540263 | 0.654064 | -6.16108 |
| KIRREL   | 0.257133 | 4.242725 | 0.613498 | 0.540253 | 0.654064 | -6.69942 |

|           |          |          |          |          |          |          |
|-----------|----------|----------|----------|----------|----------|----------|
| NSD1      | 0.098547 | 7.030487 | 0.613353 | 0.540349 | 0.654064 | -6.93589 |
| ICMT      | 0.093517 | 6.869933 | 0.613341 | 0.540357 | 0.654064 | -6.93737 |
| RRAGC     | 0.130766 | 3.98038  | 0.613236 | 0.540426 | 0.654092 | -6.66774 |
| CEACAM19  | 0.347522 | 3.369497 | 0.613098 | 0.540517 | 0.654145 | -6.48675 |
| PTPN9     | 0.075723 | 5.787701 | 0.61268  | 0.540793 | 0.654422 | -6.90872 |
| ZBTB39    | -0.10605 | 4.239684 | -0.61245 | 0.540948 | 0.654534 | -6.75815 |
| VDAC1     | 0.107989 | 7.658019 | 0.612399 | 0.540979 | 0.654534 | -6.92489 |
| STX4      | 0.092008 | 4.644841 | 0.612312 | 0.541036 | 0.654546 | -6.79167 |
| RNF32     | 0.172898 | 1.38297  | 0.612185 | 0.54112  | 0.654591 | -6.13698 |
| UBE2D2    | 0.076939 | 6.267999 | 0.611848 | 0.541342 | 0.654803 | -6.93119 |
| SCARF2    | 0.249974 | 4.063248 | 0.610762 | 0.54206  | 0.655615 | -6.66554 |
| KPNA7     | 0.434404 | -0.06749 | 0.610541 | 0.542206 | 0.655668 | -5.88183 |
| NRCAM     | 0.441166 | 3.363719 | 0.610482 | 0.542245 | 0.655668 | -6.46737 |
| TAF9B     | -0.11527 | 4.833282 | -0.6106  | 0.542165 | 0.655668 | -6.83987 |
| SETD5     | -0.08862 | 6.75961  | -0.61017 | 0.542451 | 0.65586  | -6.93901 |
| MYO10     | 0.156666 | 7.645095 | 0.609965 | 0.542586 | 0.655967 | -6.92757 |
| SLC24A1   | -0.11655 | 3.840074 | -0.60951 | 0.542888 | 0.656275 | -6.68424 |
| ZAP70     | -0.3029  | 1.252944 | -0.60938 | 0.542971 | 0.656319 | -6.19304 |
| SLA2      | 0.298065 | 0.653422 | 0.60811  | 0.543813 | 0.65728  | -6.00789 |
| ETFB      | -0.1654  | 5.815521 | -0.60792 | 0.543937 | 0.657373 | -6.92469 |
| PCDHB12   | 0.264253 | 0.780575 | 0.607743 | 0.544057 | 0.657461 | -6.03416 |
| UHRF2     | -0.1001  | 5.256096 | -0.60744 | 0.544256 | 0.657644 | -6.88279 |
| SNRNP27   | 0.072706 | 4.629094 | 0.606859 | 0.544641 | 0.658053 | -6.79487 |
| ZNF792    | 0.21253  | 2.622618 | 0.606382 | 0.544957 | 0.658378 | -6.35524 |
| BMI1      | 0.120743 | 6.177981 | 0.606106 | 0.54514  | 0.658542 | -6.93028 |
| C17orf70  | 0.082708 | 5.593443 | 0.605965 | 0.545234 | 0.658599 | -6.89867 |
| TM7SF3    | -0.15425 | 6.133502 | -0.60588 | 0.54529  | 0.658609 | -6.9367  |
| CUL2      | 0.097416 | 5.303302 | 0.605787 | 0.545352 | 0.658627 | -6.87184 |
| C7orf42   | -0.10119 | 7.343685 | -0.60529 | 0.545679 | 0.658965 | -6.93202 |
| SGTA      | 0.088861 | 6.169323 | 0.605167 | 0.545763 | 0.65901  | -6.93159 |
| LYSMD1    | -0.102   | 2.711416 | -0.60434 | 0.546308 | 0.659497 | -6.43289 |
| LOC441208 | -0.13608 | 3.296154 | -0.60448 | 0.546218 | 0.659497 | -6.5723  |
| ZC3HAV1   | -0.084   | 6.57604  | -0.60436 | 0.546301 | 0.659497 | -6.94309 |
| STAG1     | 0.110927 | 5.851977 | 0.603707 | 0.546731 | 0.659894 | -6.91626 |
| PHF12     | 0.084743 | 6.189903 | 0.603724 | 0.54672  | 0.659894 | -6.93329 |
| PCSK5     | 0.318046 | 3.656542 | 0.603401 | 0.546934 | 0.660082 | -6.56204 |
| UPK3BL    | 0.451716 | 3.977517 | 0.603266 | 0.547024 | 0.660133 | -6.60931 |
| RPS14     | -0.1212  | 8.769981 | -0.60312 | 0.547122 | 0.660194 | -6.88939 |
| CACNA1A   | -0.31952 | 0.700002 | -0.60287 | 0.547286 | 0.660279 | -6.10213 |
| SFRS2IP   | 0.087974 | 7.257151 | 0.602925 | 0.547251 | 0.660279 | -6.93848 |
| C1orf56   | -0.13352 | 2.685671 | -0.60261 | 0.547462 | 0.660387 | -6.43424 |
| CREBZF    | -0.11238 | 6.020909 | -0.60259 | 0.547471 | 0.660387 | -6.93419 |
| RAB12     | 0.147618 | 5.166938 | 0.60166  | 0.54809  | 0.66102  | -6.85622 |
| CHMP5     | 0.106624 | 5.982244 | 0.601694 | 0.548068 | 0.66102  | -6.92478 |
| C20orf118 | 0.316156 | 1.76163  | 0.601521 | 0.548183 | 0.661075 | -6.18722 |
| HECTD3    | -0.1158  | 6.395768 | -0.60029 | 0.548998 | 0.662001 | -6.9444  |
| CENPT     | -0.10939 | 4.578076 | -0.59945 | 0.549563 | 0.662625 | -6.81411 |
| GFPT1     | -0.17912 | 7.350255 | -0.59904 | 0.549832 | 0.662891 | -6.93412 |
| CECR5     | 0.124699 | 4.457038 | 0.598912 | 0.549918 | 0.662901 | -6.76764 |
| ARAP1     | 0.121227 | 6.84051  | 0.598887 | 0.549935 | 0.662901 | -6.94635 |
| UGT1A9    | 0.687904 | -0.21644 | 0.598349 | 0.550293 | 0.663263 | -5.87514 |
| OGT       | -0.13346 | 7.44636  | -0.59829 | 0.55033  | 0.663263 | -6.93336 |
| METTL10   | -0.09179 | 3.467081 | -0.5981  | 0.550456 | 0.663358 | -6.60434 |
| GLIPR1    | 0.216888 | 4.633145 | 0.597755 | 0.550689 | 0.663581 | -6.78421 |
| C10orf57  | -0.15557 | 4.963939 | -0.59755 | 0.550827 | 0.663691 | -6.86538 |
| RGS18     | 0.25555  | -0.00426 | 0.597148 | 0.551093 | 0.663725 | -5.92418 |
| CYB561D2  | -0.17382 | 3.264906 | -0.59716 | 0.551088 | 0.663725 | -6.57131 |
| MRPL16    | -0.10145 | 4.788435 | -0.59716 | 0.551086 | 0.663725 | -6.84027 |

|            |       |          |          |          |          |          |          |
|------------|-------|----------|----------|----------|----------|----------|----------|
| ERGIC2     |       | 0.122184 | 5.187959 | 0.59735  | 0.550958 | 0.663725 | -6.86288 |
| PPTC7      |       | -0.13642 | 5.387892 | -0.59729 | 0.551001 | 0.663725 | -6.90306 |
| KAL1       |       | 0.356419 | 2.972652 | 0.595751 | 0.552024 | 0.664732 | -6.41464 |
| RNF135     |       | 0.122001 | 4.260447 | 0.595757 | 0.55202  | 0.664732 | -6.73629 |
| METTL12    |       | 0.127998 | 1.538571 | 0.595047 | 0.552494 | 0.665149 | -6.1823  |
| ARL17A     |       | -0.13846 | 2.794037 | -0.59498 | 0.552537 | 0.665149 | -6.46172 |
| HOOK2      |       | 0.111648 | 5.15884  | 0.594945 | 0.552561 | 0.665149 | -6.86159 |
| SLC25A44   |       | 0.077093 | 5.779482 | 0.595143 | 0.552429 | 0.665149 | -6.91876 |
| C20orf117  |       | -0.20378 | 5.049692 | -0.59481 | 0.552655 | 0.665205 | -6.88058 |
| ENO3       |       | 0.208612 | 0.583769 | 0.594597 | 0.552794 | 0.665315 | -6.01707 |
| LRRC14     |       | 0.096021 | 5.285124 | 0.59448  | 0.552872 | 0.665351 | -6.87691 |
| UXS1       |       | 0.105247 | 5.183121 | 0.594015 | 0.553182 | 0.665645 | -6.8659  |
| ZNF142     |       | -0.08036 | 5.683902 | -0.59397 | 0.553212 | 0.665645 | -6.92219 |
| TMPRSS3    |       | 0.72558  | 1.739471 | 0.593891 | 0.553265 | 0.665652 | -6.11944 |
| RPS26      |       | -0.11893 | 5.218083 | -0.59341 | 0.553584 | 0.665978 | -6.8894  |
| NCRNA00181 |       | 0.252096 | 0.601469 | 0.5931   | 0.553793 | 0.666173 | -6.01485 |
| MAGED1     |       | -0.15877 | 7.048535 | -0.59288 | 0.553943 | 0.666295 | -6.94429 |
| IFT88      |       | 0.13202  | 3.323124 | 0.592646 | 0.554096 | 0.666422 | -6.52882 |
|            | 1-Sep | -0.20287 | 2.048384 | -0.59188 | 0.554607 | 0.66698  | -6.32726 |
| RPAIN      |       | -0.10273 | 4.412863 | -0.59173 | 0.55471  | 0.66701  | -6.79574 |
| TRAF3IP2   |       | -0.11722 | 5.605255 | -0.5917  | 0.554728 | 0.66701  | -6.92057 |
| EDC3       |       | 0.093317 | 5.19425  | 0.590454 | 0.555561 | 0.667955 | -6.87021 |
| PPP2R1A    |       | 0.071047 | 7.975937 | 0.590327 | 0.555647 | 0.668    | -6.92936 |
| LAYN       |       | 0.282142 | 2.207148 | 0.590179 | 0.555746 | 0.668004 | -6.28022 |
| TERF1      |       | -0.0888  | 4.68421  | -0.5902  | 0.555732 | 0.668004 | -6.83052 |
| SAMD14     |       | 0.233249 | 0.31929  | 0.589981 | 0.555878 | 0.668105 | -5.97619 |
| MEF2B      |       | 0.229926 | 0.91784  | 0.589655 | 0.556096 | 0.668269 | -6.06856 |
| BTBD1      |       | 0.080499 | 6.285562 | 0.589635 | 0.55611  | 0.668269 | -6.9449  |
| ANKRD34A   |       | 0.178345 | 0.291767 | 0.589251 | 0.556366 | 0.66852  | -5.98238 |
| RPS10P7    |       | -0.15635 | 1.441738 | -0.58888 | 0.556613 | 0.668759 | -6.21194 |
| GPR160     |       | -0.3266  | 4.097568 | -0.58873 | 0.556719 | 0.668828 | -6.77552 |
| NEDD9      |       | -0.21736 | 5.794211 | -0.58819 | 0.557077 | 0.669201 | -6.93747 |
| STARD3NL   |       | 0.136283 | 4.366582 | 0.586666 | 0.558099 | 0.670371 | -6.7576  |
| ZNF75A     |       | -0.16224 | 3.23184  | -0.58622 | 0.558398 | 0.670519 | -6.57448 |
| NCRNA00201 |       | -0.17139 | 5.356003 | -0.58637 | 0.558295 | 0.670519 | -6.90937 |
| RPS9       |       | -0.1056  | 8.38961  | -0.5862  | 0.55841  | 0.670519 | -6.91345 |
| BTBD2      |       | 0.105812 | 6.90346  | 0.586195 | 0.558414 | 0.670519 | -6.95345 |
| SURF4      |       | 0.090581 | 8.196781 | 0.58578  | 0.558692 | 0.670796 | -6.92588 |
| PPL        |       | 0.350542 | 7.838045 | 0.58568  | 0.558759 | 0.670818 | -6.94163 |
| RAD9B      |       | -0.11113 | 0.953974 | -0.58492 | 0.559269 | 0.671315 | -6.12686 |
| OSBPL8     |       | -0.10722 | 6.6087   | -0.58497 | 0.559238 | 0.671315 | -6.95467 |
| GLIS3      |       | 0.289393 | 3.266928 | 0.58458  | 0.559498 | 0.671532 | -6.49021 |
| HAPLN1     |       | -0.34426 | 1.064653 | -0.58437 | 0.559641 | 0.671646 | -6.17334 |
| STK24      |       | 0.109086 | 8.02044  | 0.583316 | 0.560346 | 0.672435 | -6.93312 |
| C6orf70    |       | -0.09729 | 3.575029 | -0.58294 | 0.560597 | 0.672633 | -6.63849 |
| C4A        |       | -0.32325 | 5.277392 | -0.58293 | 0.560608 | 0.672633 | -6.91634 |
| MRPL45     |       | 0.088771 | 5.145899 | 0.582681 | 0.560773 | 0.672774 | -6.87018 |
| TNK1       |       | 0.127867 | 4.202925 | 0.582489 | 0.560902 | 0.67287  | -6.72981 |
| ZNF827     |       | 0.165226 | 4.34262  | 0.582352 | 0.560994 | 0.672923 | -6.75191 |
| RTF1       |       | -0.07437 | 6.567251 | -0.58209 | 0.561173 | 0.67308  | -6.95622 |
| FKBP9L     |       | 0.265247 | 0.98819  | 0.582009 | 0.561225 | 0.673084 | -6.07804 |
| SSH1       |       | -0.09361 | 6.305424 | -0.58191 | 0.561291 | 0.673106 | -6.95353 |
| NHEJ1      |       | 0.100707 | 3.96838  | 0.581666 | 0.561455 | 0.673245 | -6.68847 |
| STK10      |       | 0.126795 | 5.314734 | 0.581513 | 0.561558 | 0.67331  | -6.88453 |
| C7orf23    |       | 0.151881 | 3.741242 | 0.580986 | 0.561912 | 0.673678 | -6.62683 |
| CYCS       |       | 0.119334 | 7.634092 | 0.580757 | 0.562067 | 0.673805 | -6.94448 |
| BDKRB1     |       | -0.27486 | 1.601525 | -0.58045 | 0.562272 | 0.673993 | -6.26633 |
| DUOXA2     |       | -0.43281 | 3.203857 | -0.58016 | 0.562466 | 0.674061 | -6.60963 |

|           |          |          |          |          |          |          |
|-----------|----------|----------|----------|----------|----------|----------|
| POLR2L    | 0.12773  | 5.601652 | 0.580152 | 0.562473 | 0.674061 | -6.91117 |
| CDK6      | 0.207596 | 7.143649 | 0.580229 | 0.562422 | 0.674061 | -6.95534 |
| MMP16     | -0.26585 | 0.423448 | -0.57892 | 0.5633   | 0.674993 | -6.06466 |
| LRFN3     | 0.143678 | 4.611188 | 0.578775 | 0.563401 | 0.675057 | -6.80033 |
| NPIPL3    | 0.1733   | 6.053472 | 0.5786   | 0.563518 | 0.675082 | -6.93881 |
| SPEN      | 0.079692 | 7.668394 | 0.578621 | 0.563504 | 0.675082 | -6.94417 |
| LOC440957 | -0.13974 | 2.38611  | -0.57846 | 0.563611 | 0.675093 | -6.38692 |
| NCK2      | 0.096039 | 6.586774 | 0.578443 | 0.563624 | 0.675093 | -6.95723 |
| ZNF547    | -0.17225 | 0.85277  | -0.57825 | 0.563755 | 0.675183 | -6.12221 |
| FAM35A    | -0.08802 | 4.98747  | -0.57814 | 0.563826 | 0.675183 | -6.87253 |
| ESD       | -0.09611 | 5.952048 | -0.57812 | 0.563844 | 0.675183 | -6.94557 |
| RAB4B     | 0.120345 | 3.981429 | 0.577918 | 0.563978 | 0.675285 | -6.6882  |
| LOC678655 | -0.13702 | 2.78047  | -0.577   | 0.564596 | 0.675792 | -6.47244 |
| SLC25A40  | 0.125531 | 3.419003 | 0.576931 | 0.564643 | 0.675792 | -6.56112 |
| LOC641298 | 0.192825 | 3.952808 | 0.577067 | 0.564551 | 0.675792 | -6.66996 |
| C3orf52   | -0.20794 | 3.824573 | -0.57708 | 0.56454  | 0.675792 | -6.71216 |
| ALDH5A1   | -0.19163 | 4.783185 | -0.57715 | 0.564498 | 0.675792 | -6.86136 |
| RPS4X     | -0.11466 | 9.741022 | -0.57661 | 0.564856 | 0.675922 | -6.87136 |
| GTF2H1    | 0.073292 | 5.421409 | 0.576617 | 0.564855 | 0.675922 | -6.9021  |
| ACBD3     | 0.078589 | 6.685657 | 0.576554 | 0.564897 | 0.675922 | -6.95932 |
| TMEM101   | 0.089225 | 4.035576 | 0.575744 | 0.565444 | 0.676519 | -6.70775 |
| AP4E1     | 0.10629  | 4.534627 | 0.575446 | 0.565645 | 0.676701 | -6.79615 |
| RNF166    | 0.111879 | 3.332183 | 0.575252 | 0.565776 | 0.6768   | -6.54681 |
| SYPL1     | 0.125016 | 7.621567 | 0.575082 | 0.56589  | 0.676879 | -6.94815 |
| C20orf12  | 0.202408 | 1.057853 | 0.574727 | 0.56613  | 0.677003 | -6.10229 |
| DTNB      | -0.15656 | 3.813477 | -0.57471 | 0.566139 | 0.677003 | -6.70739 |
| SOLH      | 0.102208 | 6.779473 | 0.574788 | 0.566089 | 0.677003 | -6.96047 |
| MAFB      | 0.304636 | 5.656476 | 0.574572 | 0.566235 | 0.677059 | -6.9064  |
| EHMT1     | 0.071993 | 6.403882 | 0.574372 | 0.56637  | 0.677162 | -6.95689 |
| PXN       | 0.126206 | 7.397382 | 0.573939 | 0.566662 | 0.677454 | -6.95347 |
| TP53RK    | 0.077955 | 4.50237  | 0.573852 | 0.566721 | 0.677466 | -6.796   |
| MPP3      | 0.193562 | 2.112905 | 0.573228 | 0.567143 | 0.677912 | -6.28635 |
| HNRNPUL2  | 0.071184 | 7.063256 | 0.572971 | 0.567317 | 0.678062 | -6.95901 |
| PACSIN3   | -0.21625 | 4.723597 | -0.57269 | 0.567508 | 0.678233 | -6.85945 |
| BRD2      | -0.06122 | 8.025442 | -0.57233 | 0.567752 | 0.678466 | -6.93485 |
| VKORC1    | -0.1068  | 5.071123 | -0.5722  | 0.567838 | 0.678511 | -6.88627 |
| QRSL1     | -0.09768 | 4.438909 | -0.57169 | 0.568185 | 0.67883  | -6.80976 |
| PRSS8     | 0.319509 | 6.702058 | 0.571661 | 0.568202 | 0.67883  | -6.95962 |
| SEC14L2   | 0.207707 | 3.849566 | 0.571537 | 0.568286 | 0.678852 | -6.64813 |
| MTOR      | -0.09046 | 6.779683 | -0.57149 | 0.568317 | 0.678852 | -6.9616  |
| NSMCE1    | -0.10864 | 5.055439 | -0.57092 | 0.568705 | 0.679257 | -6.88588 |
| CIDECP    | -0.10313 | 1.818322 | -0.57073 | 0.568835 | 0.679296 | -6.28138 |
| ECD       | 0.065286 | 5.022289 | 0.570768 | 0.568806 | 0.679296 | -6.86583 |
| DYNLT3    | -0.15074 | 5.643382 | -0.57047 | 0.56901  | 0.679446 | -6.93733 |
| NUBPL     | -0.10666 | 3.634063 | -0.57014 | 0.569229 | 0.67965  | -6.66267 |
| FANCF     | 0.144502 | 4.093914 | 0.569889 | 0.569401 | 0.679789 | -6.71136 |
| DGKE      | -0.13742 | 4.013151 | -0.56983 | 0.569442 | 0.679789 | -6.7482  |
| TMEM200B  | -0.28676 | 1.515619 | -0.56962 | 0.569581 | 0.679838 | -6.25879 |
| RPS8      | 0.105153 | 9.064395 | 0.569681 | 0.569542 | 0.679838 | -6.90561 |
| MED17     | 0.083209 | 4.78002  | 0.569531 | 0.569644 | 0.679855 | -6.83551 |
| ZNF823    | -0.12125 | 2.91876  | -0.5691  | 0.569937 | 0.680147 | -6.50209 |
| TRIM16L   | 0.331086 | 3.584181 | 0.568868 | 0.570092 | 0.680274 | -6.56387 |
| CCDC90B   | -0.09501 | 4.442959 | -0.56853 | 0.570324 | 0.680492 | -6.81221 |
| SGPP1     | -0.15838 | 4.444413 | -0.56825 | 0.570514 | 0.680641 | -6.8205  |
| PRR13     | -0.14177 | 6.34025  | -0.5682  | 0.570546 | 0.680641 | -6.96267 |
| GLCCI1    | -0.16717 | 3.396666 | -0.56777 | 0.570835 | 0.680927 | -6.62232 |
| SYNGAP1   | -0.11035 | 4.512887 | -0.56759 | 0.570956 | 0.681014 | -6.8251  |
| FAM169A   | 0.250376 | 2.980237 | 0.567319 | 0.571142 | 0.681178 | -6.44247 |

|            |          |          |          |          |          |          |
|------------|----------|----------|----------|----------|----------|----------|
| TBC1D22B   | -0.08135 | 4.461996 | -0.56719 | 0.571228 | 0.681222 | -6.81386 |
| CSF3       | 0.508716 | 1.121338 | 0.566934 | 0.571403 | 0.681358 | -6.07731 |
| PRPF39     | -0.08393 | 4.735949 | -0.56688 | 0.57144  | 0.681358 | -6.84987 |
| SNX27      | -0.08225 | 5.929924 | -0.56679 | 0.571502 | 0.681374 | -6.95055 |
| TMUB1      | -0.11342 | 5.15865  | -0.56651 | 0.57169  | 0.68154  | -6.89853 |
| RIOK3      | 0.144798 | 6.97321  | 0.566001 | 0.572036 | 0.681894 | -6.96479 |
| ALOX5      | 0.285494 | 3.499301 | 0.565909 | 0.572098 | 0.681911 | -6.55654 |
| CAP2       | -0.21917 | 2.840491 | -0.56576 | 0.572203 | 0.681977 | -6.51276 |
| C13orf31   | -0.12224 | 3.924328 | -0.56517 | 0.572602 | 0.682395 | -6.73021 |
| FKBP11     | -0.15706 | 4.418072 | -0.56502 | 0.572699 | 0.682452 | -6.81678 |
| SGTB       | -0.12994 | 3.248513 | -0.5647  | 0.57292  | 0.682657 | -6.58488 |
| SPTY2D1    | -0.08179 | 5.731569 | -0.56429 | 0.573198 | 0.68293  | -6.9422  |
| IRF2       | -0.0749  | 5.516155 | -0.56419 | 0.573264 | 0.68295  | -6.9278  |
| RPL23AP7   | -0.11822 | 1.544447 | -0.56379 | 0.573539 | 0.683196 | -6.24    |
| MARS2      | 0.125166 | 3.906721 | 0.563457 | 0.573763 | 0.683196 | -6.67977 |
| ATF2       | -0.09322 | 4.870465 | -0.56348 | 0.57375  | 0.683196 | -6.86853 |
| FTSJD2     | 0.075906 | 5.71108  | 0.563641 | 0.573638 | 0.683196 | -6.93247 |
| DUS1L      | 0.099891 | 6.241804 | 0.563512 | 0.573725 | 0.683196 | -6.95794 |
| PPP2R4     | 0.08678  | 6.70526  | 0.563654 | 0.573629 | 0.683196 | -6.96669 |
| PYGB       | -0.19236 | 8.127039 | -0.56318 | 0.573952 | 0.683363 | -6.93301 |
| MAP3K8     | -0.169   | 3.823465 | -0.56297 | 0.574093 | 0.683472 | -6.72071 |
| VPS54      | -0.07806 | 5.51876  | -0.56282 | 0.574194 | 0.683534 | -6.92886 |
| SMAD6      | -0.22657 | 3.364047 | -0.56244 | 0.574454 | 0.683786 | -6.62478 |
| ID2        | -0.18886 | 4.994129 | -0.56213 | 0.574663 | 0.683976 | -6.89187 |
| ZNF738     | -0.23712 | 2.302836 | -0.56094 | 0.575474 | 0.684829 | -6.3986  |
| HYOU1      | -0.11246 | 7.827435 | -0.56093 | 0.575478 | 0.684829 | -6.94577 |
| AREG       | 0.363716 | 4.168882 | 0.560309 | 0.575904 | 0.685277 | -6.69343 |
| CBLB       | 0.122518 | 5.162874 | 0.560188 | 0.575986 | 0.685317 | -6.88117 |
| WASH5P     | 0.115399 | 3.237243 | 0.560063 | 0.576071 | 0.68536  | -6.53023 |
| WIPI2      | 0.066678 | 6.146607 | 0.559301 | 0.57659  | 0.685919 | -6.95811 |
| APOBEC3D   | 0.234017 | 1.368419 | 0.559079 | 0.576741 | 0.68604  | -6.15643 |
| MAP3K4     | 0.098328 | 5.521031 | 0.55878  | 0.576945 | 0.686225 | -6.91906 |
| C3orf75    | -0.07989 | 3.129156 | -0.55839 | 0.57721  | 0.686481 | -6.54738 |
| C15orf58   | 0.14698  | 1.350835 | 0.558269 | 0.577293 | 0.686522 | -6.16706 |
| GSK3B      | 0.103363 | 6.645361 | 0.558137 | 0.577384 | 0.68657  | -6.96926 |
| ZSCAN12P1  | 0.258115 | 1.539208 | 0.557854 | 0.577576 | 0.686741 | -6.18324 |
| CLN3       | 0.100661 | 5.238835 | 0.557558 | 0.577778 | 0.686922 | -6.89269 |
| GJA1       | 0.318434 | 6.983201 | 0.557452 | 0.57785  | 0.68695  | -6.97009 |
| C8orf45    | 0.203642 | 0.517627 | 0.55718  | 0.578036 | 0.687112 | -6.02839 |
| KIAA0284   | -0.13036 | 7.598123 | -0.55708 | 0.578104 | 0.687135 | -6.95359 |
| ST7OT1     | -0.16732 | 0.528862 | -0.55668 | 0.578376 | 0.687399 | -6.08119 |
| SLC35D2    | -0.14993 | 4.181828 | -0.55625 | 0.578671 | 0.687633 | -6.78532 |
| LPCAT4     | -0.14871 | 5.374697 | -0.55629 | 0.578644 | 0.687633 | -6.92598 |
| C8orf58    | 0.11897  | 2.596471 | 0.556171 | 0.578724 | 0.687638 | -6.39595 |
| TAPBPL     | 0.152573 | 4.686637 | 0.556091 | 0.578778 | 0.687644 | -6.82169 |
| C16orf42   | -0.10469 | 4.803338 | -0.55595 | 0.578873 | 0.687698 | -6.86624 |
| DBNDD1     | -0.20727 | 4.290465 | -0.55559 | 0.579123 | 0.687936 | -6.81231 |
| PAFAH1B2   | 0.094891 | 4.907448 | 0.555428 | 0.579231 | 0.688006 | -6.85756 |
| LRP5       | 0.162101 | 7.438479 | 0.555085 | 0.579465 | 0.688225 | -6.96389 |
| CANT1      | 0.137944 | 6.789615 | 0.554952 | 0.579556 | 0.688275 | -6.97159 |
| SF3B5      | 0.098162 | 5.788629 | 0.553154 | 0.580784 | 0.689675 | -6.94209 |
| RAC3       | 0.245157 | 1.642987 | 0.55277  | 0.581046 | 0.689928 | -6.20545 |
| RAB1B      | -0.08481 | 7.635126 | -0.55266 | 0.581122 | 0.689958 | -6.95613 |
| NCRNA00171 | 0.135185 | 0.496244 | 0.552468 | 0.581253 | 0.690055 | -6.03643 |
| ZBTB24     | 0.084551 | 4.572706 | 0.552233 | 0.581413 | 0.690187 | -6.81711 |
| LTA4H      | -0.10085 | 6.469458 | -0.55215 | 0.581469 | 0.690195 | -6.97271 |
| POU2F2     | 0.205424 | 3.044521 | 0.551403 | 0.581981 | 0.690744 | -6.48021 |
| NARF       | -0.08189 | 4.872812 | -0.55083 | 0.582376 | 0.691154 | -6.87472 |

|              |          |          |          |          |          |          |
|--------------|----------|----------|----------|----------|----------|----------|
| LARP4B       | -0.09655 | 6.605046 | -0.55036 | 0.582697 | 0.691476 | -6.97425 |
| CLCN5        | -0.15866 | 4.557241 | -0.54999 | 0.582947 | 0.691715 | -6.84424 |
| BCL2L1       | 0.137013 | 6.898885 | 0.549767 | 0.583101 | 0.691838 | -6.97427 |
| LOC100128822 | -0.13489 | 1.987963 | -0.54955 | 0.583252 | 0.691938 | -6.32718 |
| C1orf43      | 0.07442  | 7.391465 | 0.549499 | 0.583284 | 0.691938 | -6.96636 |
| ACTG1        | 0.103677 | 12.0418  | 0.549134 | 0.583534 | 0.692176 | -6.80994 |
| ARL8B        | -0.09416 | 6.863678 | -0.54897 | 0.583648 | 0.692253 | -6.97317 |
| HOOK1        | 0.234684 | 5.496792 | 0.548475 | 0.583986 | 0.692594 | -6.9106  |
| GPR68        | 0.24904  | 3.291826 | 0.548181 | 0.584187 | 0.692715 | -6.52488 |
| GPR126       | 0.292536 | 5.271081 | 0.548244 | 0.584144 | 0.692715 | -6.88284 |
| AMPD3        | 0.179238 | 4.069723 | 0.548044 | 0.584281 | 0.692744 | -6.71511 |
| TMEM141      | -0.13188 | 4.573514 | -0.548   | 0.584311 | 0.692744 | -6.84429 |
| THAP1        | 0.07507  | 3.33413  | 0.547423 | 0.584707 | 0.693155 | -6.5696  |
| PIK3CA       | 0.11382  | 5.102476 | 0.547255 | 0.584821 | 0.693232 | -6.88334 |
| ZNF622       | 0.095573 | 4.469564 | 0.547033 | 0.584974 | 0.693354 | -6.80307 |
| HSPA4L       | 0.272552 | 4.243063 | 0.546757 | 0.585163 | 0.693519 | -6.7351  |
| C7orf29      | -0.17902 | 2.914205 | -0.5465  | 0.58534  | 0.69367  | -6.52538 |
| FBXL12       | -0.06851 | 4.121384 | -0.54623 | 0.585524 | 0.69383  | -6.76978 |
| C2orf42      | -0.05982 | 3.416174 | -0.54613 | 0.585596 | 0.693856 | -6.61644 |
| ELMO2        | -0.07796 | 5.658026 | -0.54603 | 0.585661 | 0.693873 | -6.94787 |
| LFNG         | -0.24342 | 4.620432 | -0.54569 | 0.585897 | 0.694094 | -6.86301 |
| TRPV2        | 0.203935 | 2.923681 | 0.544991 | 0.586375 | 0.694602 | -6.45639 |
| XYLB         | 0.191028 | 2.872774 | 0.544275 | 0.586866 | 0.695066 | -6.44284 |
| METT5D1      | -0.08123 | 3.985921 | -0.54435 | 0.586817 | 0.695066 | -6.74569 |
| SPDYE8P      | 0.176669 | 2.570293 | 0.543646 | 0.587298 | 0.695519 | -6.38718 |
| ATG12        | -0.07268 | 4.488243 | -0.54349 | 0.587403 | 0.695584 | -6.82944 |
| SLC6A1       | 0.26878  | -0.02588 | 0.543211 | 0.587597 | 0.695696 | -5.95018 |
| MTG1         | 0.100808 | 4.179888 | 0.543265 | 0.58756  | 0.695696 | -6.75229 |
| EIF2AK4      | 0.079823 | 5.984098 | 0.542979 | 0.587757 | 0.695826 | -6.95962 |
| PIP4K2B      | -0.09874 | 6.340703 | -0.54209 | 0.588369 | 0.696492 | -6.97657 |
| PPOX         | -0.10171 | 2.838861 | -0.54131 | 0.588906 | 0.697068 | -6.49712 |
| ASNS         | -0.17318 | 5.165465 | -0.54121 | 0.58897  | 0.697085 | -6.91795 |
| C11orf95     | 0.113398 | 4.409415 | 0.540126 | 0.589719 | 0.697853 | -6.79611 |
| PLEKHA4      | -0.1758  | 4.646549 | -0.54018 | 0.589684 | 0.697853 | -6.86431 |
| GDPD1        | -0.25576 | 0.422145 | -0.54    | 0.589805 | 0.697896 | -6.0831  |
| SNAPC2       | 0.104518 | 3.788575 | 0.539553 | 0.590114 | 0.698051 | -6.67337 |
| DKFZp761E198 | -0.09838 | 5.304183 | -0.53958 | 0.590093 | 0.698051 | -6.92583 |
| NEBL         | -0.29793 | 5.43671  | -0.53952 | 0.590136 | 0.698051 | -6.94948 |
| SOCS3        | -0.18745 | 6.73299  | -0.53953 | 0.590127 | 0.698051 | -6.97887 |
| MED12        | 0.084765 | 6.62162  | 0.538801 | 0.590631 | 0.698577 | -6.97978 |
| ASPSCR1      | 0.110828 | 4.309635 | 0.538696 | 0.590704 | 0.698605 | -6.77792 |
| PGBD5        | 0.456259 | 1.88206  | 0.538603 | 0.590768 | 0.698621 | -6.22373 |
| GTF2IP1      | -0.08244 | 8.15051  | -0.53836 | 0.590937 | 0.698762 | -6.94911 |
| TNFAIP1      | 0.096374 | 6.602367 | 0.538256 | 0.591006 | 0.698785 | -6.97977 |
| ZFP36L1      | -0.13566 | 8.637532 | -0.53791 | 0.591246 | 0.699009 | -6.9308  |
| LOC349114    | -0.12803 | 3.346405 | -0.53771 | 0.591385 | 0.699114 | -6.61818 |
| DNASE1L3     | -0.35951 | 0.539017 | -0.53729 | 0.591675 | 0.699262 | -6.12255 |
| HIATL2       | -0.1007  | 2.290479 | -0.5373  | 0.591665 | 0.699262 | -6.38366 |
| ZNF138       | 0.119371 | 3.318141 | 0.537228 | 0.591715 | 0.699262 | -6.5611  |
| SOAT1        | -0.14928 | 4.893565 | -0.53738 | 0.591612 | 0.699262 | -6.89081 |
| TNIP1        | -0.09255 | 7.084289 | -0.53716 | 0.59176  | 0.699262 | -6.97609 |
| TOE1         | 0.105485 | 3.667014 | 0.536921 | 0.591927 | 0.699345 | -6.64494 |
| AP2B1        | 0.120656 | 8.199231 | 0.536915 | 0.591931 | 0.699345 | -6.95398 |
| HSD17B14     | 0.226432 | 0.95199  | 0.53571  | 0.592762 | 0.700209 | -6.1046  |
| ZNF408       | 0.077134 | 3.81405  | 0.535724 | 0.592753 | 0.700209 | -6.68358 |
| KIAA1549     | 0.291477 | 4.226148 | 0.535432 | 0.592954 | 0.700377 | -6.72903 |
| SCCPDH       | -0.19083 | 4.554946 | -0.53519 | 0.59312  | 0.700513 | -6.85632 |
| NOMO1        | 0.091766 | 7.511876 | 0.535033 | 0.593229 | 0.700583 | -6.97203 |



|                |          |          |          |          |          |          |
|----------------|----------|----------|----------|----------|----------|----------|
| FBLN7          | -0.21849 | 0.663283 | -0.53468 | 0.593475 | 0.700814 | -6.12191 |
| GOT2           | -0.10101 | 7.303055 | -0.53451 | 0.593592 | 0.700893 | -6.97312 |
| PAPPA          | -0.23168 | 4.01834  | -0.53425 | 0.593771 | 0.701045 | -6.78328 |
| HIAT1          | -0.07397 | 5.980353 | -0.53382 | 0.594066 | 0.701334 | -6.97048 |
| SAMD10         | -0.1566  | 3.219674 | -0.5334  | 0.594354 | 0.701484 | -6.59723 |
| CCL2           | -0.26194 | 3.646482 | -0.53355 | 0.594253 | 0.701484 | -6.72317 |
| MIB2           | 0.129753 | 5.588498 | 0.533347 | 0.594394 | 0.701484 | -6.93616 |
| NPAS2          | -0.18415 | 5.856001 | -0.53344 | 0.594332 | 0.701484 | -6.96949 |
| ZNF319         | 0.124857 | 4.328417 | 0.533159 | 0.594523 | 0.701577 | -6.78358 |
| LENG9          | -0.13186 | 2.635383 | -0.53223 | 0.595162 | 0.702272 | -6.46097 |
| SEC61B         | 0.093618 | 5.583572 | 0.531386 | 0.595749 | 0.702905 | -6.93909 |
| C5orf38        | -0.40137 | 0.66404  | -0.53095 | 0.596051 | 0.703143 | -6.14621 |
| ACIN1          | -0.04901 | 7.201742 | -0.53101 | 0.596007 | 0.703143 | -6.97791 |
| PI15           | 0.317196 | 3.047709 | 0.530787 | 0.596163 | 0.703216 | -6.46753 |
| ALOX12         | 0.454495 | 1.404041 | 0.530659 | 0.596252 | 0.703261 | -6.14866 |
| IFI27L1        | -0.13976 | 1.66844  | -0.53034 | 0.596474 | 0.703464 | -6.28143 |
| GTPBP8         | 0.084825 | 2.880047 | 0.529737 | 0.596889 | 0.703835 | -6.47552 |
| ANUBL1         | -0.13632 | 2.778786 | -0.52978 | 0.596858 | 0.703835 | -6.49752 |
| ZNF551         | 0.12272  | 3.117273 | 0.528857 | 0.597499 | 0.704471 | -6.52107 |
| EMP3           | -0.18347 | 4.091627 | -0.52881 | 0.59753  | 0.704471 | -6.79351 |
| SMCR7L         | 0.074758 | 5.838152 | 0.528669 | 0.597629 | 0.704529 | -6.95968 |
| ENSA           | -0.07738 | 7.027045 | -0.52825 | 0.597917 | 0.704809 | -6.98207 |
| LOC100190986   | -0.15487 | 4.589468 | -0.52808 | 0.598036 | 0.704889 | -6.86008 |
| CALCRL         | -0.17232 | 4.58472  | -0.52604 | 0.599452 | 0.706499 | -6.86311 |
| SH3PXD2A       | -0.13805 | 7.257128 | -0.52592 | 0.599537 | 0.70654  | -6.97794 |
| CCDC126        | -0.11811 | 3.219091 | -0.52564 | 0.59973  | 0.706708 | -6.59336 |
| TMEM85         | -0.08017 | 5.79628  | -0.52534 | 0.599937 | 0.706892 | -6.9667  |
| CGREF1         | 0.32121  | 2.391154 | 0.524404 | 0.600586 | 0.707596 | -6.33806 |
| POLR3D         | 0.08358  | 4.04174  | 0.524141 | 0.600769 | 0.707752 | -6.73901 |
| C1orf128       | -0.08677 | 4.843088 | -0.52397 | 0.600887 | 0.707832 | -6.8865  |
| MS4A14         | 0.233401 | 0.286367 | 0.523868 | 0.600958 | 0.707855 | -6.00813 |
| CCDC127        | 0.114867 | 3.577383 | 0.523701 | 0.601074 | 0.707932 | -6.63164 |
| RBBP4          | 0.079593 | 7.073302 | 0.522558 | 0.601868 | 0.708808 | -6.98651 |
| HERC5          | 0.234901 | 3.244807 | 0.522373 | 0.601996 | 0.7089   | -6.53158 |
| ZNRF2          | -0.08537 | 5.361574 | -0.52221 | 0.602108 | 0.708971 | -6.93885 |
| NFYC           | 0.083867 | 5.666946 | 0.521933 | 0.602302 | 0.70914  | -6.9513  |
| LOC221710      | 0.097097 | 4.358089 | 0.521859 | 0.602353 | 0.70914  | -6.79909 |
| CHMP6          | -0.08679 | 4.086362 | -0.52155 | 0.602569 | 0.709275 | -6.77891 |
| DMTF1          | 0.096022 | 5.619112 | 0.521575 | 0.602551 | 0.709275 | -6.94709 |
| SP100          | 0.110963 | 6.325815 | 0.521457 | 0.602633 | 0.70929  | -6.98298 |
| LOC646214      | 0.146979 | 2.436376 | 0.520847 | 0.603057 | 0.70973  | -6.37809 |
| SOX2           | -0.50335 | 3.640683 | -0.52059 | 0.603235 | 0.70988  | -6.76506 |
| DOCK5          | -0.172   | 5.268828 | -0.52044 | 0.603339 | 0.709943 | -6.93805 |
| ZNF761         | 0.166799 | 4.058272 | 0.520045 | 0.603615 | 0.710087 | -6.72767 |
| ATP6V0C        | 0.093137 | 8.00912  | 0.520092 | 0.603582 | 0.710087 | -6.96783 |
| RELA           | 0.067792 | 6.904522 | 0.520076 | 0.603593 | 0.710087 | -6.9897  |
| NACA           | -0.08405 | 8.574445 | -0.51973 | 0.603834 | 0.710285 | -6.94423 |
| POLR2J2        | -0.29238 | 2.849919 | -0.51961 | 0.60392  | 0.710327 | -6.55115 |
| PDS5B          | -0.09463 | 5.695022 | -0.51899 | 0.604349 | 0.710772 | -6.9652  |
| PRSS16         | 0.185839 | 3.619458 | 0.518591 | 0.604627 | 0.710919 | -6.62048 |
| VIPR1          | -0.21477 | 3.298481 | -0.51863 | 0.604596 | 0.710919 | -6.63162 |
| C1orf9         | -0.09764 | 5.962633 | -0.51866 | 0.604577 | 0.710919 | -6.97851 |
| AKR1E2         | 0.352526 | 0.095096 | 0.518353 | 0.604792 | 0.710993 | -5.96761 |
| B3GNT3         | -0.41581 | 4.906839 | -0.51838 | 0.604774 | 0.710993 | -6.92397 |
| DKFZP686I15217 | -0.1416  | 0.701649 | -0.51805 | 0.605003 | 0.711181 | -6.1238  |
| PHLDA3         | 0.242931 | 4.963936 | 0.517747 | 0.605215 | 0.711137 | -6.87038 |
| IVNS1ABP       | 0.098608 | 7.618674 | 0.517662 | 0.605274 | 0.711138 | -6.97895 |
| ODZ3           | -0.40251 | 2.525621 | -0.51754 | 0.605359 | 0.711142 | -6.50091 |

|           |          |          |          |          |          |          |
|-----------|----------|----------|----------|----------|----------|----------|
| GUSBP1    | 0.11965  | 2.248391 | 0.517222 | 0.60558  | 0.71162  | -6.3518  |
| SELL      | 0.284594 | 2.346713 | 0.516888 | 0.605813 | 0.711834 | -6.34562 |
| NCOA5     | 0.07163  | 5.400651 | 0.516673 | 0.605963 | 0.71195  | -6.93317 |
| ALDOC     | 0.216382 | 4.341013 | 0.516595 | 0.606017 | 0.711954 | -6.77962 |
| TMEM203   | 0.079005 | 4.953869 | 0.516368 | 0.606175 | 0.71208  | -6.88581 |
| DOCK10    | 0.210622 | 3.219083 | 0.516186 | 0.606302 | 0.712169 | -6.53453 |
| FAM131C   | 0.319131 | 0.03436  | 0.516074 | 0.60638  | 0.712201 | -5.96369 |
| MRPL1     | -0.08602 | 3.851286 | -0.51593 | 0.606479 | 0.712219 | -6.73435 |
| C19orf25  | -0.0863  | 3.85871  | -0.51591 | 0.606497 | 0.712219 | -6.73529 |
| OSTM1     | -0.10267 | 5.302031 | -0.51578 | 0.606584 | 0.712261 | -6.93876 |
| KIAA1429  | -0.07149 | 6.32126  | -0.51556 | 0.606736 | 0.71232  | -6.98974 |
| CYC1      | 0.111357 | 6.861842 | 0.515593 | 0.606716 | 0.71232  | -6.99252 |
| ENTPD2    | 0.303091 | 3.420419 | 0.515141 | 0.607031 | 0.712501 | -6.55227 |
| SP4       | 0.130866 | 3.787138 | 0.515232 | 0.606968 | 0.712501 | -6.67823 |
| APOL2     | 0.139745 | 4.999865 | 0.515123 | 0.607043 | 0.712501 | -6.8854  |
| C21orf91  | 0.182068 | 4.609071 | 0.514766 | 0.607292 | 0.712733 | -6.8313  |
| CXADR     | 0.171364 | 5.305604 | 0.514431 | 0.607526 | 0.712948 | -6.9153  |
| ABHD15    | 0.109206 | 4.292752 | 0.514166 | 0.607711 | 0.713105 | -6.78826 |
| TBC1D3C   | -0.25108 | 1.286134 | -0.51394 | 0.607866 | 0.713227 | -6.24046 |
| MYCL1     | 0.313411 | 4.010092 | 0.513607 | 0.608101 | 0.713442 | -6.6879  |
| BRE       | 0.06965  | 4.952446 | 0.513448 | 0.608212 | 0.713488 | -6.8882  |
| NNMT      | -0.23843 | 4.721496 | -0.51341 | 0.608242 | 0.713488 | -6.89442 |
| C9orf150  | -0.17466 | 3.696328 | -0.51327 | 0.608334 | 0.713537 | -6.71961 |
| LPL       | -0.24711 | 2.135183 | -0.51304 | 0.608494 | 0.713576 | -6.39296 |
| DFFB      | 0.137814 | 2.517086 | 0.513082 | 0.608468 | 0.713576 | -6.39807 |
| B3GALTL   | -0.10757 | 3.557874 | -0.513   | 0.608522 | 0.713576 | -6.67508 |
| CTSD      | 0.091743 | 9.552835 | 0.512819 | 0.608651 | 0.713669 | -6.91873 |
| DIDO1     | 0.079846 | 6.905308 | 0.512566 | 0.608828 | 0.713816 | -6.99363 |
| SOD1      | 0.097434 | 6.850288 | 0.512477 | 0.60889  | 0.713829 | -6.99412 |
| GPR110    | 0.569364 | 1.686629 | 0.512336 | 0.608988 | 0.713884 | -6.18189 |
| TRANK1    | 0.143035 | 5.010963 | 0.512263 | 0.609039 | 0.713884 | -6.88758 |
| CDKN1B    | 0.090373 | 5.293328 | 0.511513 | 0.609563 | 0.714438 | -6.92394 |
| RASL11B   | -0.26941 | 0.764441 | -0.51126 | 0.609741 | 0.714586 | -6.15586 |
| KIAA1586  | 0.140562 | 2.592173 | 0.511117 | 0.60984  | 0.714643 | -6.4159  |
| EXOC5     | -0.08771 | 6.332712 | -0.51072 | 0.61012  | 0.714911 | -6.99271 |
| ZNF830    | -0.08304 | 3.535569 | -0.5103  | 0.610412 | 0.715193 | -6.66771 |
| C15orf41  | -0.0905  | 3.86066  | -0.51    | 0.610619 | 0.715376 | -6.74137 |
| HSH2D     | 0.296214 | 2.755505 | 0.509635 | 0.610876 | 0.715557 | -6.41505 |
| OSGEP     | 0.08981  | 3.685939 | 0.509705 | 0.610827 | 0.715557 | -6.667   |
| UBAC2     | 0.079692 | 5.92533  | 0.509259 | 0.61114  | 0.715805 | -6.97429 |
| GAA       | -0.18182 | 6.53227  | -0.50909 | 0.61126  | 0.715887 | -6.99605 |
| GK5       | 0.114145 | 5.343649 | 0.508864 | 0.611416 | 0.715949 | -6.92783 |
| SLC40A1   | -0.26781 | 6.553543 | -0.50887 | 0.61141  | 0.715949 | -6.99577 |
| KIF13A    | -0.13379 | 5.992123 | -0.50814 | 0.61192  | 0.71648  | -6.98622 |
| TSGA10    | -0.16091 | 1.524117 | -0.50748 | 0.612386 | 0.716905 | -6.2696  |
| FAM105A   | 0.238017 | 3.550888 | 0.507503 | 0.612368 | 0.716905 | -6.60206 |
| TUBB2A    | -0.18202 | 5.546564 | -0.50736 | 0.612468 | 0.71694  | -6.96683 |
| NNAT      | -0.21913 | 0.758313 | -0.50721 | 0.612574 | 0.716944 | -6.15125 |
| HEBP2     | -0.11523 | 5.876733 | -0.50724 | 0.612553 | 0.716944 | -6.9814  |
| TSPAN5    | -0.20343 | 2.153987 | -0.50595 | 0.613455 | 0.717915 | -6.39305 |
| EFNB2     | 0.171301 | 6.592655 | 0.505803 | 0.613559 | 0.717977 | -6.9956  |
| SPATS2    | 0.086259 | 4.831436 | 0.505292 | 0.613917 | 0.718336 | -6.87528 |
| ALPL      | -0.20266 | 2.884888 | -0.50479 | 0.614267 | 0.718685 | -6.54907 |
| FUT11     | -0.10057 | 3.786942 | -0.50464 | 0.614377 | 0.718693 | -6.73131 |
| SNX3      | -0.07481 | 6.921707 | -0.50465 | 0.614369 | 0.718693 | -6.99591 |
| C17orf106 | 0.104412 | 3.427716 | 0.504422 | 0.614528 | 0.71881  | -6.60612 |
| CHN2      | -0.29021 | 2.167658 | -0.50408 | 0.614765 | 0.719027 | -6.40839 |
| IL17RA    | -0.08961 | 4.694135 | -0.50386 | 0.614919 | 0.719102 | -6.87875 |

|               |          |          |          |          |          |          |
|---------------|----------|----------|----------|----------|----------|----------|
| PDLIM4        | -0.25495 | 4.599543 | -0.50384 | 0.614932 | 0.719102 | -6.88719 |
| COG5          | 0.084752 | 5.788934 | 0.503737 | 0.615008 | 0.719131 | -6.96885 |
| SPR           | 0.125555 | 4.752315 | 0.503547 | 0.615141 | 0.719195 | -6.86106 |
| XPO7          | 0.074852 | 6.66524  | 0.503511 | 0.615166 | 0.719195 | -6.99856 |
| HCLS1         | 0.204728 | 3.864071 | 0.5026   | 0.615806 | 0.719883 | -6.68938 |
| SMYD4         | -0.07968 | 3.963569 | -0.50223 | 0.616064 | 0.720064 | -6.76392 |
| RGS12         | -0.13716 | 5.207836 | -0.50223 | 0.616063 | 0.720064 | -6.93995 |
| DNAJA3        | 0.07574  | 5.869303 | 0.50207  | 0.616178 | 0.720137 | -6.97513 |
| RPL23AP82     | 0.123754 | 1.906462 | 0.501918 | 0.616285 | 0.720191 | -6.29877 |
| ARHGAP30      | 0.158402 | 4.053981 | 0.501563 | 0.616534 | 0.720191 | -6.7412  |
| ZNF618        | 0.175556 | 4.837298 | 0.501575 | 0.616525 | 0.720191 | -6.86767 |
| RPS12         | 0.123003 | 7.940786 | 0.50167  | 0.616458 | 0.720191 | -6.97982 |
| PPARD         | -0.12004 | 6.6908   | -0.50177 | 0.616392 | 0.720191 | -6.99937 |
| ENG           | 0.138654 | 6.713034 | 0.501677 | 0.616454 | 0.720191 | -6.99939 |
| BICC1         | -0.29753 | 1.416823 | -0.50102 | 0.616918 | 0.72058  | -6.27842 |
| API5          | 0.06698  | 7.069704 | 0.500804 | 0.617067 | 0.720694 | -6.9975  |
| GEMIN8P4      | 0.140407 | 0.448757 | 0.500537 | 0.617255 | 0.720832 | -6.05481 |
| CIAO1         | 0.05371  | 6.247577 | 0.500489 | 0.617289 | 0.720832 | -6.99293 |
| P2RX5         | 0.211377 | 1.494564 | 0.500363 | 0.617377 | 0.720875 | -6.21398 |
| RASGRP3       | -0.18416 | 2.995227 | -0.50017 | 0.617509 | 0.720894 | -6.56631 |
| DNAJC25       | -0.07795 | 3.302109 | -0.50006 | 0.617587 | 0.720894 | -6.61842 |
| POLE4         | 0.089911 | 3.799098 | 0.500256 | 0.617452 | 0.720894 | -6.69585 |
| ARMCX5        | -0.08994 | 3.94567  | -0.50005 | 0.617599 | 0.720894 | -6.76345 |
| PLGLB2        | 0.187608 | 0.929137 | 0.499872 | 0.617722 | 0.720976 | -6.12275 |
| AIDA          | 0.067411 | 5.586479 | 0.499517 | 0.617972 | 0.721208 | -6.95795 |
| PARD3         | -0.15291 | 6.126032 | -0.49944 | 0.618027 | 0.721212 | -6.99517 |
| BRSK1         | 0.240345 | 0.810465 | 0.498914 | 0.618396 | 0.721582 | -6.09894 |
| ANKRD36       | -0.13731 | 3.720272 | -0.49857 | 0.618637 | 0.721804 | -6.72361 |
| P4HB          | -0.08512 | 9.730262 | -0.49849 | 0.618691 | 0.721806 | -6.91439 |
| ACAP1         | 0.216797 | 1.675089 | 0.497928 | 0.619089 | 0.722206 | -6.2445  |
| USP28         | -0.08419 | 5.119386 | -0.49786 | 0.619137 | 0.722206 | -6.92916 |
| MTFR1         | 0.092214 | 5.210844 | 0.497757 | 0.619209 | 0.72223  | -6.92191 |
| ULK4          | 0.142478 | 1.578582 | 0.49743  | 0.619439 | 0.722438 | -6.23799 |
| DUOXA1        | -0.3587  | 3.350248 | -0.49734 | 0.619502 | 0.722451 | -6.68526 |
| GLT8D2        | -0.20239 | 2.580965 | -0.49687 | 0.619834 | 0.722717 | -6.48386 |
| FAM69A        | -0.12239 | 4.004411 | -0.49693 | 0.619789 | 0.722717 | -6.78344 |
| C10orf47      | 0.207793 | 3.810887 | 0.496761 | 0.619911 | 0.722746 | -6.67508 |
| KIAA0317      | -0.07972 | 5.759196 | -0.49638 | 0.620177 | 0.722997 | -6.97942 |
| MAP2K3        | -0.11117 | 6.108219 | -0.49616 | 0.620336 | 0.723121 | -6.9953  |
| C20orf4       | 0.07515  | 5.452638 | 0.495494 | 0.620803 | 0.723605 | -6.94812 |
| FLNB          | -0.13496 | 8.81198  | -0.49539 | 0.620877 | 0.723632 | -6.94631 |
| PCDHGC5       | 0.354927 | 0.356818 | 0.495174 | 0.621028 | 0.72365  | -6.0175  |
| PCDHB2        | 0.282375 | 1.476042 | 0.495267 | 0.620962 | 0.72365  | -6.20464 |
| KCNMB4        | -0.23659 | 1.034553 | -0.49507 | 0.6211   | 0.72365  | -6.20684 |
| NPNT          | 0.231532 | 5.462861 | 0.495128 | 0.62106  | 0.72365  | -6.93616 |
| PCTP          | -0.13557 | 3.722533 | -0.49485 | 0.621253 | 0.72376  | -6.72499 |
| C2orf3        | -0.07138 | 4.479125 | -0.49479 | 0.621298 | 0.72376  | -6.85357 |
| JMJD7-PLA2G4B | -0.15031 | 4.938204 | -0.49454 | 0.621473 | 0.723843 | -6.91813 |
| NDE1          | 0.117712 | 5.658555 | 0.494566 | 0.621457 | 0.723843 | -6.96272 |
| TTC7A         | -0.08033 | 6.035044 | -0.49439 | 0.621582 | 0.723909 | -6.99291 |
| SLCO4A1       | -0.28496 | 4.205238 | -0.49431 | 0.621638 | 0.723915 | -6.83973 |
| LIMK2         | 0.100632 | 6.266971 | 0.49378  | 0.62201  | 0.724288 | -6.99555 |
| THAP4         | 0.066161 | 5.759676 | 0.493412 | 0.62227  | 0.72453  | -6.9733  |
| LGALS9        | -0.19298 | 6.033763 | -0.49304 | 0.62253  | 0.724773 | -6.99672 |
| PTPMT1        | 0.07541  | 4.798823 | 0.492955 | 0.622592 | 0.724784 | -6.879   |
| ERBB3         | -0.2281  | 7.36946  | -0.49276 | 0.622733 | 0.724887 | -6.99057 |
| GALNT6        | 0.246597 | 5.275743 | 0.492337 | 0.623028 | 0.725171 | -6.91494 |
| NACA2         | 0.159162 | 1.013638 | 0.492141 | 0.623167 | 0.725211 | -6.14509 |

|              |          |          |          |          |          |          |
|--------------|----------|----------|----------|----------|----------|----------|
| ST6GAL1      | -0.24846 | 5.460969 | -0.49218 | 0.62314  | 0.725211 | -6.97258 |
| C14orf129    | 0.13395  | 5.403111 | 0.491933 | 0.623313 | 0.725322 | -6.94021 |
| 3-Mar        | -0.20429 | 2.522339 | -0.49139 | 0.623699 | 0.725572 | -6.47288 |
| TUT1         | -0.06865 | 4.293429 | -0.4913  | 0.623757 | 0.725572 | -6.8268  |
| SEMA5A       | -0.19441 | 4.293191 | -0.49128 | 0.623777 | 0.725572 | -6.84558 |
| MYO15B       | -0.28656 | 5.219244 | -0.49126 | 0.623788 | 0.725572 | -6.95703 |
| PEA15        | 0.087393 | 7.246741 | 0.491505 | 0.623615 | 0.725572 | -6.99948 |
| ZNF22        | 0.101112 | 4.378182 | 0.491067 | 0.623925 | 0.72567  | -6.81574 |
| NUMBL        | 0.131087 | 5.006036 | 0.490856 | 0.624073 | 0.725752 | -6.90014 |
| PLIN2        | -0.19704 | 4.730136 | -0.4906  | 0.624255 | 0.725752 | -6.90121 |
| JAGN1        | -0.08977 | 5.035688 | -0.49071 | 0.624178 | 0.725752 | -6.92413 |
| LUZP1        | 0.08973  | 6.188001 | 0.490809 | 0.624107 | 0.725752 | -6.99473 |
| SH3PXD2B     | -0.13828 | 6.464584 | -0.49065 | 0.624222 | 0.725752 | -7.00491 |
| LEMD3        | -0.08487 | 5.422235 | -0.4904  | 0.624395 | 0.725855 | -6.96011 |
| PIGO         | 0.097582 | 5.571541 | 0.490211 | 0.624529 | 0.72595  | -6.95868 |
| BMP2K        | -0.11899 | 4.361148 | -0.49002 | 0.624666 | 0.726049 | -6.846   |
| DKK3         | 0.167236 | 5.992866 | 0.48981  | 0.624812 | 0.726158 | -6.9834  |
| CAMSAP1L1    | 0.113253 | 6.372982 | 0.489659 | 0.624919 | 0.726222 | -7.00022 |
| LOC100130581 | 0.132612 | 1.305489 | 0.489468 | 0.625054 | 0.726315 | -6.19712 |
| MFSD11       | -0.0675  | 4.870961 | -0.48921 | 0.625236 | 0.726315 | -6.90486 |
| CPNE3        | -0.08772 | 7.284698 | -0.48918 | 0.625259 | 0.726315 | -6.99688 |
| BPTF         | -0.06904 | 7.120897 | -0.48921 | 0.625236 | 0.726315 | -7.00035 |
| TNS3         | -0.19291 | 6.680541 | -0.48926 | 0.625198 | 0.726315 | -7.00514 |
| ALKBH8       | -0.08727 | 3.122091 | -0.489   | 0.625383 | 0.726398 | -6.58402 |
| RASGRF2      | -0.19392 | 1.824975 | -0.48845 | 0.625774 | 0.726617 | -6.33814 |
| SLC25A45     | -0.13635 | 2.012259 | -0.48853 | 0.625713 | 0.726617 | -6.36399 |
| SNX22        | -0.0981  | 2.594129 | -0.48844 | 0.625778 | 0.726617 | -6.46752 |
| TMEM109      | -0.09637 | 6.769058 | -0.48849 | 0.625748 | 0.726617 | -7.00552 |
| CHD4         | -0.05003 | 8.213196 | -0.48826 | 0.625906 | 0.726644 | -6.97362 |
| THBD         | -0.25205 | 6.379818 | -0.48831 | 0.625875 | 0.726644 | -7.0061  |
| KRIT1        | 0.106843 | 5.55337  | 0.488063 | 0.626047 | 0.726747 | -6.95788 |
| ATP11C       | -0.1036  | 4.75612  | -0.48764 | 0.626348 | 0.726976 | -6.89629 |
| FHDC1        | -0.17464 | 4.877131 | -0.48767 | 0.626327 | 0.726976 | -6.91588 |
| C17orf44     | -0.12961 | 0.660736 | -0.48752 | 0.626428 | 0.727008 | -6.13235 |
| PLEKHG3      | 0.133853 | 6.170257 | 0.487088 | 0.626736 | 0.727203 | -6.9944  |
| GOLPH3       | -0.07441 | 7.194881 | -0.48707 | 0.626752 | 0.727203 | -6.99992 |
| POM121C      | 0.081079 | 6.460367 | 0.487102 | 0.626727 | 0.727203 | -7.00401 |
| SHF          | -0.1773  | 1.484228 | -0.48694 | 0.626842 | 0.727247 | -6.27827 |
| ATG2A        | -0.0867  | 6.070152 | -0.48654 | 0.627126 | 0.727516 | -6.99811 |
| DGCR6        | 0.147728 | 3.149208 | 0.486242 | 0.627335 | 0.727698 | -6.54491 |
| BDH1         | 0.163932 | 5.150052 | 0.48599  | 0.627513 | 0.727845 | -6.91457 |
| DZIP1L       | 0.265325 | 2.426412 | 0.485693 | 0.627724 | 0.727968 | -6.37588 |
| LASS2        | -0.09156 | 7.276236 | -0.48569 | 0.627723 | 0.727968 | -6.99865 |
| SEMA4G       | -0.35766 | 3.884455 | -0.48554 | 0.627832 | 0.728033 | -6.79689 |
| FAM167A      | 0.267438 | 2.752818 | 0.485379 | 0.627946 | 0.728044 | -6.43455 |
| EP400NL      | 0.098321 | 2.878072 | 0.48542  | 0.627917 | 0.728044 | -6.49368 |
| PPM1D        | -0.07519 | 3.90384  | -0.4849  | 0.628284 | 0.728376 | -6.75951 |
| NGEF         | 0.236288 | 3.284297 | 0.484816 | 0.628344 | 0.728385 | -6.55313 |
| TMEM135      | 0.106572 | 4.223513 | 0.484594 | 0.628502 | 0.728507 | -6.78926 |
| HMG20A       | -0.05662 | 5.040706 | -0.48422 | 0.628767 | 0.728754 | -6.92487 |
| FZD7         | 0.229626 | 5.108488 | 0.483459 | 0.629306 | 0.729318 | -6.90588 |
| RPL19P12     | -0.13749 | 0.358438 | -0.48331 | 0.629409 | 0.729378 | -6.08656 |
| C22orf30     | 0.084647 | 6.31743  | 0.483212 | 0.62948  | 0.7294   | -7.00256 |
| DUSP5        | -0.23388 | 4.570486 | -0.4827  | 0.62984  | 0.729756 | -6.89173 |
| FAM119A      | 0.110579 | 3.394274 | 0.482531 | 0.629963 | 0.729838 | -6.60797 |
| C1orf162     | 0.19005  | 2.390505 | 0.482    | 0.63034  | 0.730068 | -6.38415 |
| KIFC3        | 0.147471 | 5.043467 | 0.482007 | 0.630335 | 0.730068 | -6.9064  |
| MNT          | 0.075554 | 5.814997 | 0.481957 | 0.63037  | 0.730068 | -6.98185 |

|                |          |          |          |          |          |          |
|----------------|----------|----------|----------|----------|----------|----------|
| MAFK           | 0.101287 | 6.02597  | 0.482082 | 0.630281 | 0.730068 | -6.99186 |
| LYZ            | 0.392589 | 7.62957  | 0.481781 | 0.630495 | 0.730151 | -7.00193 |
| KRT13          | 0.947635 | 4.876805 | 0.481365 | 0.63079  | 0.730384 | -6.77625 |
| LOC653566      | 0.094944 | 6.124805 | 0.481351 | 0.6308   | 0.730384 | -6.99669 |
| SYNGR3         | -0.2086  | 0.434259 | -0.48126 | 0.630867 | 0.7304   | -6.11128 |
| SYS1           | -0.08476 | 4.945858 | -0.48104 | 0.631022 | 0.73052  | -6.919   |
| TFE3           | -0.07578 | 6.228541 | -0.48096 | 0.631081 | 0.730527 | -7.0051  |
| PAX6           | -0.19179 | 1.696262 | -0.48071 | 0.631255 | 0.730668 | -6.31865 |
| LCMT1          | 0.077047 | 4.395258 | 0.480085 | 0.631699 | 0.731121 | -6.82848 |
| ECM1           | 0.269724 | 6.176967 | 0.479177 | 0.632343 | 0.731806 | -6.99335 |
| ZDHHC6         | 0.073426 | 5.135799 | 0.478614 | 0.632743 | 0.732148 | -6.92502 |
| INO80          | -0.05855 | 5.804453 | -0.47867 | 0.632705 | 0.732148 | -6.98949 |
| CD5            | 0.253885 | 1.688179 | 0.478427 | 0.632875 | 0.73224  | -6.25019 |
| ZNF550         | -0.12884 | 2.951868 | -0.47807 | 0.633127 | 0.732471 | -6.55999 |
| TRIM34         | -0.11313 | 2.80657  | -0.47773 | 0.633372 | 0.732693 | -6.5218  |
| BRCC3          | 0.087432 | 5.029358 | 0.477435 | 0.633581 | 0.732874 | -6.91297 |
| POLR2J4        | -0.11304 | 3.712894 | -0.47736 | 0.633635 | 0.732876 | -6.7324  |
| CASP10         | 0.216577 | 4.7851   | 0.477084 | 0.63383  | 0.733041 | -6.8673  |
| CIITA          | 0.257299 | 3.817547 | 0.476434 | 0.634292 | 0.733515 | -6.67933 |
| ABHD13         | -0.08009 | 4.732195 | -0.47635 | 0.634348 | 0.733519 | -6.89602 |
| DHRS4L2        | -0.14858 | 2.544083 | -0.4758  | 0.634743 | 0.733915 | -6.4748  |
| THAP3          | -0.09268 | 2.996297 | -0.47564 | 0.634854 | 0.733983 | -6.56134 |
| TRIM27         | 0.074296 | 6.083989 | 0.475558 | 0.634915 | 0.733993 | -6.99852 |
| LCOR           | 0.126351 | 3.965187 | 0.475462 | 0.634983 | 0.734011 | -6.73583 |
| NFKB1          | 0.076374 | 6.3391   | 0.475058 | 0.635271 | 0.734282 | -7.00722 |
| C6orf226       | 0.127743 | 1.386781 | 0.474912 | 0.635375 | 0.734307 | -6.21919 |
| THG1L          | -0.08    | 2.845725 | -0.47488 | 0.635397 | 0.734307 | -6.52741 |
| PIGS           | 0.08876  | 5.94018  | 0.47434  | 0.635782 | 0.734691 | -6.99176 |
| FMO3           | 0.219447 | 1.154891 | 0.474237 | 0.635855 | 0.734714 | -6.16822 |
| HOXA4          | -0.18505 | 1.977212 | -0.47407 | 0.635976 | 0.734793 | -6.37634 |
| BIRC2          | 0.076089 | 6.094012 | 0.473805 | 0.636162 | 0.734948 | -6.9997  |
| GFER           | 0.078347 | 3.741436 | 0.472847 | 0.636844 | 0.735675 | -6.69894 |
| TP53TG1        | -0.14299 | 2.893878 | -0.47231 | 0.637224 | 0.736053 | -6.55341 |
| GLI2           | 0.336995 | 3.869837 | 0.471806 | 0.637586 | 0.736367 | -6.68084 |
| PEPD           | 0.093029 | 5.674236 | 0.471784 | 0.637602 | 0.736367 | -6.97621 |
| CCNI2          | 0.397617 | 0.61144  | 0.471532 | 0.637782 | 0.736471 | -6.05385 |
| DKFZp686O24166 | 0.275876 | 3.47586  | 0.471511 | 0.637797 | 0.736471 | -6.59892 |
| PPP4R1         | 0.112999 | 7.139502 | 0.471225 | 0.638    | 0.736645 | -7.01139 |
| RAPGEF6        | -0.09287 | 4.333773 | -0.47109 | 0.638099 | 0.736698 | -6.84698 |
| PDZD8          | -0.14135 | 5.753861 | -0.47074 | 0.638347 | 0.736923 | -6.99435 |
| FAF1           | 0.060319 | 5.659039 | 0.470641 | 0.638416 | 0.736943 | -6.97778 |
| ZFC3H1         | -0.07624 | 5.821406 | -0.47029 | 0.63867  | 0.737174 | -6.99517 |
| DERL3          | 0.262875 | 2.887822 | 0.469859 | 0.638974 | 0.737427 | -6.46659 |
| IQCG           | 0.162716 | 2.97323  | 0.469797 | 0.639018 | 0.737427 | -6.51157 |
| C19orf63       | 0.093879 | 6.869906 | 0.469756 | 0.639047 | 0.737427 | -7.01491 |
| ZNF567         | -0.11847 | 3.008734 | -0.46957 | 0.639179 | 0.737518 | -6.57591 |
| SLAMF6         | -0.24442 | 1.390247 | -0.46892 | 0.639644 | 0.737994 | -6.27944 |
| CENPB          | 0.072244 | 6.687559 | 0.468716 | 0.63979  | 0.738101 | -7.01555 |
| GLI3           | -0.27228 | 4.091575 | -0.46856 | 0.639903 | 0.738171 | -6.83779 |
| C18orf22       | -0.09085 | 3.270972 | -0.46814 | 0.640198 | 0.738395 | -6.63125 |
| MKKS           | 0.076659 | 5.390229 | 0.468137 | 0.640203 | 0.738395 | -6.95545 |
| SLC30A1        | -0.10863 | 4.428857 | -0.468   | 0.640299 | 0.738445 | -6.86454 |
| C7orf54        | -0.12636 | 1.453684 | -0.46761 | 0.64058  | 0.738708 | -6.27094 |
| RASA3          | -0.16886 | 4.323465 | -0.4671  | 0.640946 | 0.739008 | -6.85757 |
| TGM2           | -0.24125 | 7.197224 | -0.46714 | 0.640916 | 0.739008 | -7.00641 |
| IQCE           | 0.130135 | 5.496917 | 0.466621 | 0.641286 | 0.739339 | -6.96092 |
| ALDH18A1       | 0.093939 | 6.627136 | 0.465842 | 0.641842 | 0.739919 | -7.01629 |
| ASB6           | 0.061329 | 5.292567 | 0.465653 | 0.641977 | 0.740013 | -6.94857 |

|              |          |          |          |          |          |          |
|--------------|----------|----------|----------|----------|----------|----------|
| RPL24        | 0.101941 | 7.585374 | 0.465245 | 0.642268 | 0.740288 | -7.00547 |
| DUOX2        | -0.37936 | 6.002731 | -0.46457 | 0.642748 | 0.74078  | -7.01352 |
| C1R          | -0.18883 | 7.063666 | -0.46407 | 0.643106 | 0.741071 | -7.01141 |
| PITRM1       | -0.07788 | 6.564801 | -0.46415 | 0.643055 | 0.741071 | -7.01775 |
| UBE2H        | -0.08736 | 6.277739 | -0.46392 | 0.64322  | 0.74114  | -7.01442 |
| MIF4GD       | 0.100346 | 4.219102 | 0.463686 | 0.643383 | 0.741268 | -6.80235 |
| CRYZ         | -0.12027 | 4.685877 | -0.46353 | 0.643492 | 0.741331 | -6.9004  |
| RPL36        | 0.106429 | 8.015381 | 0.463406 | 0.643584 | 0.741376 | -6.99577 |
| PRKG2        | -0.2334  | 0.148107 | -0.46315 | 0.643765 | 0.741524 | -6.0811  |
| GNRH1        | 0.13394  | 0.757604 | 0.463018 | 0.643861 | 0.741536 | -6.12021 |
| LOC729603    | 0.117708 | 1.51918  | 0.46299  | 0.643882 | 0.741536 | -6.2486  |
| RPL4         | -0.08409 | 9.509768 | -0.46237 | 0.644323 | 0.741983 | -6.93939 |
| UBE3C        | -0.08006 | 7.045462 | -0.46205 | 0.644553 | 0.742187 | -7.01441 |
| NAPSB        | 0.257684 | 0.052637 | 0.461618 | 0.644863 | 0.742483 | -6.00199 |
| C12orf36     | -0.38351 | 1.617183 | -0.46153 | 0.644924 | 0.742492 | -6.33662 |
| ANK1         | -0.25684 | 1.626827 | -0.46111 | 0.64523  | 0.742723 | -6.32558 |
| CC2D1B       | -0.05579 | 5.203719 | -0.4611  | 0.645231 | 0.742723 | -6.95217 |
| CCDC111      | -0.08958 | 2.588569 | -0.46058 | 0.64561  | 0.742925 | -6.48065 |
| PHF11        | -0.08545 | 4.516464 | -0.46057 | 0.645614 | 0.742925 | -6.8764  |
| NCKIPSD      | -0.07988 | 4.909766 | -0.46072 | 0.645507 | 0.742925 | -6.92417 |
| CTBP2        | -0.08676 | 6.560397 | -0.46056 | 0.645619 | 0.742925 | -7.01941 |
| ZNF713       | -0.14329 | 1.522898 | -0.46031 | 0.645802 | 0.743073 | -6.29103 |
| CDC42EP2     | 0.143596 | 4.127761 | 0.460227 | 0.64586  | 0.743079 | -6.77573 |
| PHF13        | 0.080891 | 4.622785 | 0.460021 | 0.646007 | 0.743187 | -6.8721  |
| HEXA         | 0.089039 | 5.889832 | 0.459851 | 0.646129 | 0.743267 | -6.99578 |
| BBS7         | -0.07158 | 3.73273  | -0.4596  | 0.646312 | 0.743415 | -6.73403 |
| ZSCAN29      | -0.06073 | 4.904157 | -0.45927 | 0.646543 | 0.743621 | -6.92189 |
| DHRS2        | -0.37905 | 0.531452 | -0.45907 | 0.646686 | 0.743663 | -6.15386 |
| SCAMP2       | -0.095   | 7.051459 | -0.45909 | 0.646678 | 0.743663 | -7.01542 |
| LOC100271836 | 0.103884 | 4.947806 | 0.458702 | 0.646953 | 0.743908 | -6.91016 |
| ORMDL1       | -0.06166 | 4.897717 | -0.45862 | 0.647013 | 0.743916 | -6.92156 |
| SLC35E4      | 0.145292 | 2.986102 | 0.458143 | 0.647353 | 0.744179 | -6.51984 |
| TMEM19       | 0.095122 | 5.30296  | 0.458082 | 0.647397 | 0.744179 | -6.95043 |
| CDK11B       | -0.08308 | 5.350718 | -0.458   | 0.647455 | 0.744179 | -6.96936 |
| GIGYF1       | -0.09024 | 5.949103 | -0.45801 | 0.64745  | 0.744179 | -7.00726 |
| SPIN2B       | -0.15468 | 0.589853 | -0.45781 | 0.647594 | 0.744216 | -6.13802 |
| LIN7B        | -0.1251  | 0.901257 | -0.45785 | 0.647562 | 0.744216 | -6.18367 |
| TXNDC17      | 0.126301 | 5.510424 | 0.457706 | 0.647667 | 0.744239 | -6.9669  |
| MEAF6        | 0.066165 | 5.510957 | 0.456765 | 0.648342 | 0.744953 | -6.97226 |
| LEPROTL1     | 0.079648 | 5.290841 | 0.45661  | 0.648453 | 0.744959 | -6.95084 |
| TIA1         | 0.079174 | 6.221996 | 0.456623 | 0.648444 | 0.744959 | -7.0123  |
| DHRS11       | -0.15102 | 3.651156 | -0.45651 | 0.648526 | 0.744981 | -6.72971 |
| CCDC102B     | 0.154048 | 1.420574 | 0.45597  | 0.648913 | 0.745284 | -6.22893 |
| HNF4A        | -0.61445 | 2.140131 | -0.45601 | 0.648881 | 0.745284 | -6.46815 |
| IL17RD       | -0.18729 | 3.198785 | -0.45592 | 0.64895  | 0.745284 | -6.63819 |
| ZNF664       | -0.08338 | 6.978569 | -0.45437 | 0.65006  | 0.746498 | -7.01896 |
| ZDHHC20      | -0.10862 | 4.624694 | -0.45398 | 0.650341 | 0.746698 | -6.89589 |
| TMEM106B     | -0.08911 | 6.714252 | -0.45402 | 0.650316 | 0.746698 | -7.02216 |
| TATDN2       | -0.06526 | 5.921273 | -0.45321 | 0.650898 | 0.747276 | -7.0073  |
| ACOT13       | -0.10002 | 4.593427 | -0.45292 | 0.651104 | 0.747451 | -6.89167 |
| FGFBP3       | 0.144811 | 0.489241 | 0.452693 | 0.651267 | 0.747576 | -6.08282 |
| TFPI2        | 0.354904 | 0.032595 | 0.452445 | 0.651445 | 0.74772  | -5.99035 |
| LOC100133331 | 0.099023 | 4.521878 | 0.452231 | 0.651599 | 0.747835 | -6.8578  |
| TMEM55A      | -0.13336 | 2.757921 | -0.452   | 0.651765 | 0.747964 | -6.53185 |
| DENND2D      | -0.12617 | 4.755974 | -0.45147 | 0.652145 | 0.748339 | -6.91442 |
| FST          | -0.31768 | 2.756419 | -0.45122 | 0.652328 | 0.748487 | -6.56937 |
| CCDC88B      | 0.170261 | 3.778379 | 0.451023 | 0.652468 | 0.748553 | -6.69993 |
| C9orf167     | -0.26037 | 5.568935 | -0.45099 | 0.652493 | 0.748553 | -6.99873 |

|           |          |          |          |          |          |          |
|-----------|----------|----------|----------|----------|----------|----------|
| SLC17A9   | 0.336737 | 3.564828 | 0.45069  | 0.652708 | 0.748663 | -6.61053 |
| ZNF213    | -0.07278 | 5.068769 | -0.45063 | 0.652749 | 0.748663 | -6.94509 |
| SLC7A1    | 0.107985 | 7.736003 | 0.450764 | 0.652655 | 0.748663 | -7.00879 |
| SLC39A7   | 0.093385 | 6.508721 | 0.45027  | 0.65301  | 0.748901 | -7.02188 |
| FAM21B    | -0.09422 | 4.656478 | -0.45015 | 0.653095 | 0.748937 | -6.90028 |
| TEC       | -0.15512 | 1.299208 | -0.44913 | 0.653834 | 0.749722 | -6.25903 |
| ZNF292    | -0.09642 | 6.266649 | -0.44901 | 0.653917 | 0.749757 | -7.02114 |
| PECR      | -0.13944 | 2.360893 | -0.44802 | 0.654631 | 0.750397 | -6.44695 |
| MRPS33    | 0.094539 | 4.034187 | 0.448074 | 0.654591 | 0.750397 | -6.77154 |
| SMEK2     | -0.05761 | 7.052891 | -0.44801 | 0.654637 | 0.750397 | -7.02099 |
| PRINS     | 0.178875 | 0.259023 | 0.447459 | 0.655034 | 0.750729 | -6.04718 |
| SLC30A7   | 0.080927 | 6.215761 | 0.447522 | 0.654989 | 0.750729 | -7.01612 |
| C21orf56  | 0.236997 | 2.627268 | 0.447222 | 0.655205 | 0.750801 | -6.43557 |
| MBTPS2    | -0.08134 | 4.850713 | -0.44724 | 0.65519  | 0.750801 | -6.92374 |
| FGF1      | -0.20433 | 1.223253 | -0.44703 | 0.655341 | 0.750896 | -6.25711 |
| TMEM2     | -0.16989 | 6.395595 | -0.44665 | 0.65562  | 0.751154 | -7.02511 |
| ZNF774    | 0.141912 | 1.052086 | 0.446274 | 0.655889 | 0.751366 | -6.17316 |
| FNTB      | 0.069526 | 5.032449 | 0.44624  | 0.655913 | 0.751366 | -6.92986 |
| LONP1     | -0.06826 | 6.272452 | -0.44589 | 0.656167 | 0.751595 | -7.02214 |
| PIK3CG    | 0.232456 | 1.607701 | 0.445059 | 0.656765 | 0.752219 | -6.25392 |
| N6AMT2    | -0.10688 | 2.027157 | -0.44491 | 0.656871 | 0.752254 | -6.38193 |
| PAQR3     | 0.104511 | 4.509769 | 0.444867 | 0.656903 | 0.752254 | -6.86023 |
| ATL2      | 0.082039 | 6.441047 | 0.444606 | 0.657092 | 0.752408 | -7.0234  |
| CMPK1     | -0.09802 | 7.755805 | -0.44445 | 0.6572   | 0.752471 | -7.0065  |
| ADAM9     | -0.12572 | 7.606069 | -0.44432 | 0.657296 | 0.752519 | -7.00977 |
| AGPAT4    | 0.160958 | 3.500419 | 0.443959 | 0.657558 | 0.752758 | -6.64113 |
| ZNF276    | -0.07694 | 4.788428 | -0.44283 | 0.658375 | 0.75363  | -6.91814 |
| ZNF182    | -0.09554 | 3.02269  | -0.44256 | 0.658568 | 0.753728 | -6.58293 |
| KCNN4     | 0.277435 | 3.60249  | 0.442618 | 0.658527 | 0.753728 | -6.63345 |
| ZKSCAN4   | -0.07553 | 1.96304  | -0.44226 | 0.658784 | 0.753914 | -6.36608 |
| MMAB      | -0.08272 | 4.120247 | -0.44209 | 0.658906 | 0.753991 | -6.82304 |
| GLB1L2    | -0.29496 | 3.057888 | -0.44146 | 0.659363 | 0.754453 | -6.63217 |
| MBNL1     | 0.079101 | 7.811231 | 0.44126  | 0.659507 | 0.754556 | -7.01059 |
| ATF6      | -0.0555  | 6.176913 | -0.44099 | 0.659703 | 0.754719 | -7.02164 |
| DEGS2     | -0.30064 | 3.113149 | -0.44087 | 0.659793 | 0.754759 | -6.63713 |
| RRP7B     | 0.079206 | 2.49593  | 0.440703 | 0.65991  | 0.754831 | -6.43945 |
| MLX       | -0.06797 | 5.933462 | -0.44049 | 0.660065 | 0.754947 | -7.01351 |
| DIRC2     | 0.090499 | 4.651459 | 0.440057 | 0.660377 | 0.755242 | -6.88347 |
| RBBP6     | -0.06443 | 6.261237 | -0.43988 | 0.660504 | 0.755326 | -7.02448 |
| MFAP3L    | 0.231753 | 2.382476 | 0.438883 | 0.661226 | 0.756089 | -6.39388 |
| IL34      | -0.19786 | 1.162499 | -0.43861 | 0.661424 | 0.7562   | -6.24973 |
| CAPNS1    | 0.077917 | 8.389353 | 0.438525 | 0.661486 | 0.7562   | -6.99453 |
| TPD52     | 0.123998 | 7.228463 | 0.43857  | 0.661453 | 0.7562   | -7.02489 |
| LRRC37B2  | 0.074034 | 4.286193 | 0.437865 | 0.661963 | 0.756684 | -6.83032 |
| CDC42EP4  | -0.09382 | 6.740176 | -0.43716 | 0.662474 | 0.757145 | -7.02947 |
| POLDIP2   | 0.060176 | 6.758776 | 0.437168 | 0.662467 | 0.757145 | -7.02997 |
| RSBN1L    | -0.07243 | 4.695675 | -0.43698 | 0.662603 | 0.75723  | -6.90896 |
| DNAJC19   | -0.09275 | 3.93248  | -0.4367  | 0.662803 | 0.757396 | -6.79045 |
| DHPS      | -0.06605 | 4.931383 | -0.43629 | 0.663101 | 0.75756  | -6.93608 |
| SH3BP4    | -0.1099  | 7.162226 | -0.43628 | 0.663109 | 0.75756  | -7.02331 |
| PTP4A2    | -0.09297 | 6.577732 | -0.43641 | 0.663014 | 0.75756  | -7.03026 |
| RNASEK    | -0.07859 | 6.377542 | -0.4362  | 0.663168 | 0.757565 | -7.02853 |
| FAM65C    | 0.188534 | 1.893652 | 0.436039 | 0.663285 | 0.757606 | -6.31365 |
| HAS2      | -0.19708 | 2.120266 | -0.43593 | 0.663366 | 0.757606 | -6.41784 |
| ZNF446    | -0.08646 | 3.120709 | -0.43595 | 0.663346 | 0.757606 | -6.6085  |
| C6orf136  | 0.091085 | 3.910717 | 0.435835 | 0.663432 | 0.75762  | -6.74955 |
| LOC220594 | 0.323734 | 0.552097 | 0.435729 | 0.663509 | 0.757646 | -6.07357 |
| TMEM134   | -0.10934 | 4.591042 | -0.43558 | 0.663621 | 0.757711 | -6.90016 |

|              |          |          |          |          |          |          |
|--------------|----------|----------|----------|----------|----------|----------|
| ARFGEF1      | -0.07997 | 6.83968  | -0.43548 | 0.663692 | 0.75773  | -7.02933 |
| MAPK11       | -0.14276 | 2.201406 | -0.43523 | 0.663868 | 0.757869 | -6.42269 |
| CES8         | 0.222621 | 1.020046 | 0.434873 | 0.664129 | 0.757982 | -6.16244 |
| VPS36        | -0.07916 | 5.945325 | -0.43497 | 0.664063 | 0.757982 | -7.01689 |
| NAP1L4       | 0.065529 | 6.389381 | 0.434906 | 0.664106 | 0.757982 | -7.0269  |
| PDE7A        | 0.121964 | 5.122669 | 0.434359 | 0.664502 | 0.758345 | -6.93878 |
| BRMS1L       | 0.108006 | 3.62363  | 0.434173 | 0.664637 | 0.758437 | -6.68678 |
| TBX1         | 0.386701 | 1.346074 | 0.433523 | 0.665108 | 0.758913 | -6.19417 |
| PHLPP2       | -0.10786 | 3.912787 | -0.43312 | 0.6654   | 0.75915  | -6.79181 |
| LRDD         | 0.085094 | 4.354283 | 0.433087 | 0.665425 | 0.75915  | -6.84053 |
| AHRR         | -0.17314 | 1.725886 | -0.43277 | 0.665654 | 0.75935  | -6.34585 |
| CCDC157      | -0.09639 | 0.368232 | -0.43256 | 0.665804 | 0.759397 | -6.10451 |
| ABCC3        | 0.284979 | 6.23319  | 0.43259  | 0.665785 | 0.759397 | -7.0159  |
| CDK11A       | -0.0909  | 4.870698 | -0.43191 | 0.666277 | 0.759874 | -6.93358 |
| ARL4D        | 0.332223 | 2.857066 | 0.431316 | 0.666709 | 0.760305 | -6.47847 |
| AKR1B1       | 0.169641 | 5.336324 | 0.43083  | 0.667062 | 0.760646 | -6.95939 |
| PFDN1        | 0.062536 | 5.320274 | 0.430631 | 0.667206 | 0.760748 | -6.96709 |
| CD97         | -0.1829  | 5.997391 | -0.43041 | 0.667365 | 0.760866 | -7.02416 |
| LOC100131434 | -0.12856 | 0.767854 | -0.43025 | 0.667486 | 0.760942 | -6.17321 |
| NOVA2        | -0.13267 | 0.308635 | -0.42995 | 0.667704 | 0.76103  | -6.10162 |
| TSNARE1      | -0.09182 | 3.663337 | -0.42999 | 0.66767  | 0.76103  | -6.73362 |
| ATG9A        | 0.064543 | 6.801705 | 0.429915 | 0.667726 | 0.76103  | -7.03303 |
| GOLT1A       | -0.42366 | -0.61451 | -0.4296  | 0.667954 | 0.761228 | -6.00004 |
| DLL1         | 0.157163 | 4.079714 | 0.429503 | 0.668025 | 0.761247 | -6.77876 |
| SMARCC2      | -0.04931 | 7.017563 | -0.42916 | 0.668274 | 0.761468 | -7.02993 |
| GCN1L1       | -0.06346 | 7.7153   | -0.42886 | 0.66849  | 0.761652 | -7.01519 |
| ADCK1        | -0.07437 | 3.352623 | -0.42871 | 0.668602 | 0.761718 | -6.65969 |
| TM2D3        | 0.059059 | 4.567756 | 0.42863  | 0.66866  | 0.761721 | -6.87997 |
| LOC645166    | -0.16237 | 1.79363  | -0.42844 | 0.668798 | 0.761817 | -6.35592 |
| MST1         | -0.15784 | 0.875828 | -0.42819 | 0.668977 | 0.761959 | -6.1949  |
| PRCP         | -0.08703 | 6.04665  | -0.42795 | 0.669152 | 0.762096 | -7.02411 |
| PDGFA        | -0.14843 | 4.499531 | -0.42735 | 0.669594 | 0.762537 | -6.89584 |
| STMN3        | 0.210394 | 3.804639 | 0.42722  | 0.669685 | 0.762578 | -6.70809 |
| RAB14        | -0.06054 | 7.056641 | -0.42699 | 0.669852 | 0.762706 | -7.03005 |
| SRRD         | -0.0614  | 3.541175 | -0.42672 | 0.670045 | 0.762864 | -6.70269 |
| NCRNA00183   | -0.07359 | 3.730373 | -0.42651 | 0.670202 | 0.762981 | -6.74813 |
| DFFA         | -0.06101 | 5.293655 | -0.42609 | 0.670509 | 0.763269 | -6.9766  |
| CCDC8        | -0.24913 | 1.441527 | -0.42577 | 0.670737 | 0.763465 | -6.3117  |
| WHSC1L1      | 0.0846   | 6.070758 | 0.425696 | 0.670793 | 0.763467 | -7.01999 |
| CREB1        | 0.054652 | 5.882066 | 0.425349 | 0.671046 | 0.763673 | -7.01234 |
| UBXN4        | 0.05699  | 7.639236 | 0.425297 | 0.671083 | 0.763673 | -7.02111 |
| IGSF3        | 0.192846 | 6.515795 | 0.425192 | 0.67116  | 0.763698 | -7.03127 |
| TBL3         | 0.070528 | 5.422621 | 0.424993 | 0.671304 | 0.7638   | -6.97825 |
| CRIP1        | -0.18339 | 4.99067  | -0.4246  | 0.671589 | 0.764062 | -6.95803 |
| SLC45A3      | -0.16481 | 3.813104 | -0.42384 | 0.672147 | 0.764634 | -6.77785 |
| ZNF487       | -0.09362 | 0.955784 | -0.42338 | 0.672478 | 0.764948 | -6.20192 |
| SMEK1        | -0.05538 | 6.478632 | -0.42312 | 0.672666 | 0.7651   | -7.03513 |
| MARK1        | -0.24517 | 3.858108 | -0.42216 | 0.673371 | 0.765839 | -6.81264 |
| AGAP6        | -0.09267 | 3.288042 | -0.42166 | 0.673731 | 0.766186 | -6.65232 |
| PIK3R5       | -0.17603 | 2.301659 | -0.42107 | 0.674165 | 0.766618 | -6.45518 |
| KIAA1967     | 0.070134 | 6.440166 | 0.420854 | 0.67432  | 0.766731 | -7.03382 |
| EARS2        | 0.06902  | 4.64973  | 0.420515 | 0.674567 | 0.76695  | -6.89343 |
| RHPN2        | 0.311215 | 5.01448  | 0.420084 | 0.674881 | 0.767245 | -6.90941 |
| C6orf26      | 0.151221 | 0.829131 | 0.419922 | 0.674999 | 0.767263 | -6.14598 |
| TMEM164      | -0.1017  | 5.369034 | -0.41991 | 0.675007 | 0.767263 | -6.9885  |
| NT5C3L       | 0.138927 | 4.313509 | 0.419767 | 0.675112 | 0.76732  | -6.83251 |
| C17orf79     | 0.067126 | 4.4734   | 0.419584 | 0.675245 | 0.767409 | -6.86924 |
| LTBP2        | 0.156165 | 6.769626 | 0.419398 | 0.675381 | 0.767501 | -7.03737 |



|           |          |          |          |          |          |          |
|-----------|----------|----------|----------|----------|----------|----------|
| SDHAF1    | 0.073127 | 3.165145 | 0.418943 | 0.675713 | 0.767754 | -6.59285 |
| MRPS7     | 0.067192 | 5.34329  | 0.418946 | 0.675711 | 0.767754 | -6.97361 |
| CAPN10    | -0.08078 | 3.821149 | -0.41872 | 0.675874 | 0.767874 | -6.77053 |
| PNPLA6    | -0.0623  | 6.037015 | -0.41841 | 0.6761   | 0.768068 | -7.02701 |
| ZFYVE26   | -0.07126 | 5.800076 | -0.41833 | 0.67616  | 0.768074 | -7.01685 |
| DYNC112   | 0.058571 | 5.74637  | 0.4182   | 0.676256 | 0.76812  | -7.00711 |
| SPRR3     | 0.848669 | 4.037174 | 0.417376 | 0.676857 | 0.768676 | -6.63734 |
| NR1D2     | -0.09254 | 5.793553 | -0.41735 | 0.676878 | 0.768676 | -7.01788 |
| MICAL3    | 0.09616  | 6.334332 | 0.417303 | 0.67691  | 0.768676 | -7.03237 |
| FGFR2     | -0.17387 | 5.330591 | -0.41709 | 0.677066 | 0.76879  | -6.99259 |
| NAGK      | 0.097562 | 5.523771 | 0.417015 | 0.677121 | 0.76879  | -6.98844 |
| INTS9     | 0.075649 | 4.220747 | 0.416596 | 0.677426 | 0.769074 | -6.82544 |
| DNAJC10   | -0.08107 | 6.990352 | -0.41645 | 0.677531 | 0.769131 | -7.03527 |
| TAF7      | 0.062994 | 6.658339 | 0.416199 | 0.677716 | 0.769279 | -7.03865 |
| CEP70     | 0.094023 | 4.176629 | 0.415601 | 0.678153 | 0.769712 | -6.81499 |
| NEK6      | 0.12918  | 5.238278 | 0.415476 | 0.678245 | 0.769754 | -6.95865 |
| TRAPPC2P1 | 0.089396 | 2.332885 | 0.415055 | 0.678553 | 0.77004  | -6.41811 |
| FUT4      | -0.24279 | 4.391289 | -0.41439 | 0.679037 | 0.770528 | -6.89613 |
| TSSK6     | -0.09146 | 0.89779  | -0.41349 | 0.679696 | 0.77115  | -6.19486 |
| SPATA2L   | 0.083978 | 3.77749  | 0.413551 | 0.679652 | 0.77115  | -6.73211 |
| HCST      | 0.181548 | 1.212335 | 0.413064 | 0.680008 | 0.771316 | -6.20988 |
| RHBDL2    | 0.197251 | 2.798449 | 0.413134 | 0.679957 | 0.771316 | -6.48639 |
| ABCB8     | -0.07178 | 5.002569 | -0.41312 | 0.679965 | 0.771316 | -6.95387 |
| RPL13     | -0.09219 | 9.548272 | -0.4127  | 0.680272 | 0.771553 | -6.95947 |
| PSEN2     | -0.10183 | 3.647626 | -0.41219 | 0.68065  | 0.771611 | -6.74124 |
| ISG20     | -0.16217 | 4.038017 | -0.41218 | 0.680655 | 0.771611 | -6.83122 |
| NLRP1     | 0.192354 | 4.5828   | 0.412453 | 0.680455 | 0.771611 | -6.873   |
| SUFU      | -0.06666 | 4.563798 | -0.41222 | 0.680624 | 0.771611 | -6.90223 |
| MCRS1     | 0.053696 | 5.491555 | 0.412471 | 0.680441 | 0.771611 | -6.9906  |
| MARCKS    | 0.080145 | 7.427766 | 0.412383 | 0.680506 | 0.771611 | -7.03151 |
| SAPS3     | 0.070715 | 7.157973 | 0.412008 | 0.680781 | 0.771692 | -7.03657 |
| UNC5CL    | -0.32809 | 2.316413 | -0.4116  | 0.681078 | 0.771966 | -6.47934 |
| LZTR1     | -0.06788 | 5.662648 | -0.41135 | 0.681263 | 0.772113 | -7.0118  |
| VTI1A     | -0.05663 | 4.553227 | -0.41079 | 0.681673 | 0.772452 | -6.89945 |
| H2AFJ     | -0.12125 | 5.273358 | -0.41081 | 0.681657 | 0.772452 | -6.98607 |
| PSTPIP2   | -0.16988 | 3.54148  | -0.41064 | 0.68178  | 0.77251  | -6.73308 |
| SCFD2     | 0.074062 | 3.781449 | 0.410028 | 0.68223  | 0.772896 | -6.73702 |
| UBB       | -0.09585 | 9.250753 | -0.41003 | 0.68223  | 0.772896 | -6.97069 |
| CNNM2     | -0.07179 | 3.8018   | -0.40903 | 0.682961 | 0.773661 | -6.76894 |
| MAP7D3    | -0.14602 | 3.52814  | -0.4088  | 0.68313  | 0.773789 | -6.72765 |
| ODZ2      | 0.588908 | 3.601684 | 0.408713 | 0.683193 | 0.773798 | -6.59561 |
| MCAT      | 0.064409 | 3.699733 | 0.40837  | 0.683445 | 0.773911 | -6.72013 |
| TMEM41B   | 0.072378 | 5.333153 | 0.408373 | 0.683443 | 0.773911 | -6.97626 |
| MEX3C     | -0.08094 | 5.527312 | -0.40835 | 0.683459 | 0.773911 | -7.00471 |
| NSMAF     | 0.069638 | 5.285748 | 0.40826  | 0.683525 | 0.773924 | -6.97256 |
| THEM4     | -0.10292 | 3.940857 | -0.40773 | 0.683915 | 0.774302 | -6.80469 |
| LOC282997 | -0.09694 | 0.604279 | -0.40721 | 0.684294 | 0.774668 | -6.15248 |
| PRKRA     | -0.05334 | 5.647423 | -0.40684 | 0.684567 | 0.774914 | -7.0119  |
| KDELC2    | -0.08849 | 5.759143 | -0.40676 | 0.684625 | 0.774918 | -7.02044 |
| C1orf122  | -0.07229 | 4.818997 | -0.40638 | 0.684902 | 0.775107 | -6.93637 |
| MIDN      | -0.07681 | 7.233319 | -0.40638 | 0.684903 | 0.775107 | -7.0351  |
| ZNF354A   | 0.089106 | 3.553551 | 0.406237 | 0.685008 | 0.775163 | -6.68459 |
| TAF9      | 0.057791 | 5.652959 | 0.405954 | 0.685216 | 0.775335 | -7.00562 |
| ADAP1     | 0.218527 | 4.96701  | 0.405759 | 0.685359 | 0.775435 | -6.92254 |
| SPDYE1    | 0.11476  | 0.442462 | 0.405533 | 0.685525 | 0.775441 | -6.09832 |
| DACT1     | -0.18249 | 2.685981 | -0.40564 | 0.685444 | 0.775441 | -6.54525 |
| C22orf28  | 0.05338  | 6.048715 | 0.405523 | 0.685532 | 0.775441 | -7.02863 |
| ZNF205    | 0.067476 | 3.619581 | 0.40536  | 0.685652 | 0.775514 | -6.70247 |

|           |          |          |          |          |          |          |
|-----------|----------|----------|----------|----------|----------|----------|
| LOC388789 | -0.07219 | 4.216661 | -0.40523 | 0.685744 | 0.775556 | -6.85346 |
| SCRN3     | -0.07156 | 4.279435 | -0.40512 | 0.685825 | 0.775585 | -6.86424 |
| DENND1C   | -0.1132  | 3.218975 | -0.40496 | 0.685947 | 0.775644 | -6.64546 |
| CSPP1     | 0.083896 | 4.409692 | 0.404901 | 0.685988 | 0.775644 | -6.86242 |
| FBXL16    | -0.19242 | 2.419081 | -0.40465 | 0.68617  | 0.775786 | -6.48875 |
| PEX1      | 0.108352 | 4.873646 | 0.404511 | 0.686275 | 0.775842 | -6.92427 |
| FAM195B   | -0.08627 | 4.295934 | -0.40426 | 0.686456 | 0.775985 | -6.86937 |
| GALNT5    | -0.26728 | 3.119527 | -0.40393 | 0.6867   | 0.776197 | -6.64944 |
| KATNAL1   | -0.12719 | 3.780821 | -0.40377 | 0.686821 | 0.776271 | -6.78213 |
| C9orf37   | 0.074195 | 2.473589 | 0.403242 | 0.687207 | 0.776644 | -6.44973 |
| C20orf96  | 0.15086  | 2.57958  | 0.402871 | 0.687479 | 0.776884 | -6.45841 |
| COX17     | -0.08402 | 4.032427 | -0.4028  | 0.68753  | 0.776884 | -6.82178 |
| ZNF787    | 0.068081 | 4.980479 | 0.402369 | 0.687848 | 0.77718  | -6.94205 |
| UBE2L3    | 0.057201 | 6.40506  | 0.402128 | 0.688025 | 0.777317 | -7.04107 |
| C1orf226  | -0.15546 | 4.808439 | -0.40161 | 0.688406 | 0.777685 | -6.94463 |
| SSH2      | -0.08306 | 5.221605 | -0.40143 | 0.688536 | 0.777769 | -6.98164 |
| RAB24     | -0.08422 | 3.815048 | -0.40107 | 0.688801 | 0.778005 | -6.7792  |
| IREB2     | -0.06009 | 6.195948 | -0.40075 | 0.689038 | 0.77821  | -7.03914 |
| IL6       | -0.2556  | 1.363389 | -0.40037 | 0.689318 | 0.778401 | -6.31162 |
| MPV17L2   | 0.072101 | 3.821004 | 0.400371 | 0.689316 | 0.778401 | -6.75057 |
| SLC4A7    | -0.0996  | 5.312371 | -0.40023 | 0.689418 | 0.778451 | -6.99217 |
| AMMECR1L  | -0.05096 | 5.185567 | -0.39951 | 0.689948 | 0.778986 | -6.97653 |
| C19orf39  | 0.0814   | 1.050422 | 0.399294 | 0.690108 | 0.779055 | -6.20097 |
| ZNRF1     | -0.0782  | 5.000807 | -0.39922 | 0.69016  | 0.779055 | -6.9606  |
| STK35     | 0.063518 | 6.488591 | 0.399201 | 0.690177 | 0.779055 | -7.04367 |
| KILLIN    | 0.093212 | 0.229655 | 0.398746 | 0.690512 | 0.779371 | -6.07217 |
| ARSJ      | -0.17513 | 3.836795 | -0.39862 | 0.690606 | 0.779414 | -6.80174 |
| RAB3IL1   | 0.148451 | 2.80204  | 0.398482 | 0.690706 | 0.779464 | -6.50937 |
| P2RY11    | 0.105743 | 3.055553 | 0.398245 | 0.69088  | 0.779597 | -6.57055 |
| C2orf54   | 0.350543 | 2.9322   | 0.397586 | 0.691365 | 0.779922 | -6.49613 |
| PKNOX1    | -0.04718 | 4.554084 | -0.39755 | 0.691391 | 0.779922 | -6.90442 |
| PSMD9     | 0.061613 | 5.068528 | 0.397699 | 0.691281 | 0.779922 | -6.9547  |
| CHMP1B    | -0.07281 | 6.520287 | -0.39768 | 0.691294 | 0.779922 | -7.04609 |
| MGC23270  | 0.138696 | 0.189305 | 0.397372 | 0.691523 | 0.780008 | -6.06214 |
| CDC42EP5  | 0.251262 | 3.821335 | 0.39683  | 0.691921 | 0.780269 | -6.70919 |
| CSNK1G3   | 0.055263 | 5.130555 | 0.396914 | 0.69186  | 0.780269 | -6.96229 |
| CBARA1    | -0.06493 | 5.611276 | -0.3969  | 0.691868 | 0.780269 | -7.01389 |
| RAB32     | 0.129876 | 3.913552 | 0.396077 | 0.692476 | 0.78083  | -6.7615  |
| ARNTL     | -0.08875 | 3.628211 | -0.39594 | 0.692576 | 0.780881 | -6.74301 |
| IFITM2    | 0.143007 | 6.086498 | 0.395799 | 0.692681 | 0.780936 | -7.03076 |
| FBXO44    | -0.0991  | 3.480302 | -0.39569 | 0.692758 | 0.78096  | -6.71006 |
| PIK3R6    | 0.175625 | -0.0143  | 0.395328 | 0.693028 | 0.781088 | -6.02825 |
| ARMCX6    | 0.142852 | 1.703711 | 0.395236 | 0.693095 | 0.781088 | -6.30689 |
| TRIP4     | 0.053227 | 4.416076 | 0.395457 | 0.692933 | 0.781088 | -6.87159 |
| TCTN3     | -0.05534 | 5.147193 | -0.39524 | 0.693091 | 0.781088 | -6.97468 |
| STOM      | -0.11584 | 7.577404 | -0.39508 | 0.693208 | 0.781089 | -7.03138 |
| OPA1      | 0.071032 | 7.085678 | 0.395129 | 0.693174 | 0.781089 | -7.04454 |
| B4GALT1   | 0.085189 | 7.772082 | 0.394622 | 0.693548 | 0.781409 | -7.03111 |
| CCNO      | 0.164789 | 1.913708 | 0.394177 | 0.693876 | 0.781713 | -6.33359 |
| UNC13D    | 0.185419 | 5.191024 | 0.394028 | 0.693986 | 0.781713 | -6.95688 |
| HNRPDL    | -0.04712 | 7.247236 | -0.39406 | 0.69396  | 0.781713 | -7.04025 |
| EIF3E     | 0.068291 | 7.641134 | 0.393465 | 0.694401 | 0.782055 | -7.0343  |
| MYH10     | -0.18025 | 5.891986 | -0.39347 | 0.694397 | 0.782055 | -7.03572 |
| TMEM229B  | 0.206627 | 2.736241 | 0.393201 | 0.694596 | 0.782148 | -6.48118 |
| SLC25A1   | -0.07647 | 5.947831 | -0.39326 | 0.694553 | 0.782148 | -7.03412 |
| SCML2     | 0.261764 | 0.879689 | 0.392288 | 0.695269 | 0.782754 | -6.155   |
| CCDC132   | 0.086924 | 4.809785 | 0.392221 | 0.695318 | 0.782754 | -6.92364 |
| FAM21C    | -0.05863 | 5.94398  | -0.39233 | 0.69524  | 0.782754 | -7.03371 |

|              |          |          |          |          |          |          |
|--------------|----------|----------|----------|----------|----------|----------|
| MGST1        | -0.23419 | 6.330761 | -0.39217 | 0.695358 | 0.782754 | -7.04782 |
| C4orf42      | -0.06916 | 4.045361 | -0.39188 | 0.695573 | 0.782933 | -6.82713 |
| C6orf97      | 0.200579 | 0.505757 | 0.391443 | 0.695892 | 0.783182 | -6.10163 |
| MTCP1        | -0.08516 | 0.854988 | -0.39142 | 0.695907 | 0.783182 | -6.19701 |
| CD48         | -0.17441 | 2.205956 | -0.39119 | 0.696078 | 0.783277 | -6.44871 |
| FAM126A      | 0.15754  | 5.189723 | 0.391158 | 0.696103 | 0.783277 | -6.96181 |
| MTAP         | -0.17688 | 4.739638 | -0.39051 | 0.696577 | 0.783748 | -6.9442  |
| OAZ1         | 0.061745 | 8.515089 | 0.390151 | 0.696845 | 0.783986 | -7.00965 |
| TIMM44       | 0.061292 | 4.616219 | 0.389799 | 0.697106 | 0.784216 | -6.90256 |
| PAOX         | -0.10361 | 2.245248 | -0.38956 | 0.697283 | 0.784353 | -6.44493 |
| LDLR         | -0.11025 | 7.579163 | -0.38937 | 0.697424 | 0.784447 | -7.03367 |
| LETM2        | 0.141709 | 1.368253 | 0.389218 | 0.697534 | 0.784508 | -6.24933 |
| JTB          | -0.07197 | 6.559392 | -0.38909 | 0.697631 | 0.784554 | -7.04966 |
| STRAP        | 0.062881 | 6.687345 | 0.3889   | 0.697769 | 0.784646 | -7.04973 |
| NCRNA00174   | 0.119581 | 4.172654 | 0.388546 | 0.698031 | 0.784677 | -6.81869 |
| PIGG         | 0.075525 | 4.922949 | 0.388407 | 0.698133 | 0.784677 | -6.93994 |
| FCGBP        | -0.32603 | 5.18099  | -0.38858 | 0.698005 | 0.784677 | -7.00106 |
| SIKE1        | 0.061503 | 5.658225 | 0.388538 | 0.698036 | 0.784677 | -7.01274 |
| TC2N         | -0.16378 | 6.171434 | -0.38846 | 0.698093 | 0.784677 | -7.04562 |
| MYO5B        | -0.16651 | 6.270136 | -0.38857 | 0.69801  | 0.784677 | -7.0476  |
| SLC9A6       | 0.055626 | 4.947218 | 0.388131 | 0.698337 | 0.784843 | -6.94566 |
| SLC12A7      | 0.149207 | 6.896999 | 0.387405 | 0.698873 | 0.785382 | -7.05023 |
| MFAP1        | 0.04589  | 4.879858 | 0.387305 | 0.698948 | 0.785403 | -6.93879 |
| CDKL1        | 0.118985 | 0.931814 | 0.387189 | 0.699034 | 0.785436 | -6.18095 |
| SUPT5H       | 0.043747 | 7.242799 | 0.386989 | 0.699181 | 0.785538 | -7.04461 |
| ANKHD1       | -0.06031 | 7.338254 | -0.38653 | 0.699518 | 0.785854 | -7.0411  |
| ITGAL        | 0.195725 | 3.298788 | 0.385672 | 0.700155 | 0.786506 | -6.61301 |
| C1orf66      | -0.06569 | 4.1042   | -0.38473 | 0.700854 | 0.787228 | -6.83967 |
| ETNK2        | -0.23248 | 3.015807 | -0.38455 | 0.700986 | 0.787313 | -6.64554 |
| GRIPAP1      | -0.05225 | 5.236337 | -0.38409 | 0.701328 | 0.787634 | -6.9876  |
| C12orf65     | 0.065981 | 3.419683 | 0.383986 | 0.701402 | 0.787654 | -6.66594 |
| WDFY4        | -0.21788 | 2.156575 | -0.38361 | 0.701679 | 0.787902 | -6.45046 |
| NCRNA00095   | 0.137473 | 1.656672 | 0.382899 | 0.702207 | 0.788431 | -6.30121 |
| MOBK2A       | -0.08858 | 6.263679 | -0.38258 | 0.702439 | 0.788629 | -7.04851 |
| FAM171B      | 0.141327 | 2.946754 | 0.38231  | 0.702643 | 0.788645 | -6.54625 |
| C1orf210     | -0.20855 | 2.981664 | -0.38236 | 0.702609 | 0.788645 | -6.61088 |
| CCDC12       | -0.06148 | 4.069421 | -0.38229 | 0.702654 | 0.788645 | -6.8335  |
| COMTD1       | 0.106311 | 4.266772 | 0.38226  | 0.70268  | 0.788645 | -6.8421  |
| NDUFA7       | -0.07296 | 4.499853 | -0.38209 | 0.702806 | 0.788645 | -6.90532 |
| ZHX2         | 0.088256 | 5.164348 | 0.382054 | 0.702833 | 0.788645 | -6.96872 |
| MLL4         | 0.061717 | 6.85442  | 0.382031 | 0.702849 | 0.788645 | -7.05212 |
| FLJ43663     | 0.112192 | 2.006446 | 0.381742 | 0.703063 | 0.788725 | -6.36875 |
| LOC100216545 | 0.084129 | 2.618625 | 0.381696 | 0.703097 | 0.788725 | -6.48668 |
| HERC2P2      | -0.09342 | 5.747334 | -0.38163 | 0.703146 | 0.788725 | -7.02975 |
| LASS6        | 0.09151  | 6.699298 | 0.381689 | 0.703102 | 0.788725 | -7.05245 |
| GABRP        | 0.466022 | 3.321407 | 0.381349 | 0.703354 | 0.788895 | -6.56259 |
| NRL          | -0.09057 | 0.124557 | -0.38069 | 0.703845 | 0.789382 | -6.08792 |
| PARP11       | 0.103223 | 3.319355 | 0.379551 | 0.704686 | 0.790262 | -6.63819 |
| LAX1         | -0.20901 | 0.566063 | -0.3791  | 0.705019 | 0.790318 | -6.17284 |
| ZNF594       | 0.111515 | 2.45273  | 0.379178 | 0.704963 | 0.790318 | -6.45151 |
| SH3BP5L      | 0.058675 | 4.98491  | 0.379287 | 0.704883 | 0.790318 | -6.95299 |
| ERAP2        | 0.219676 | 5.247262 | 0.379102 | 0.705019 | 0.790318 | -6.96668 |
| PANK3        | 0.084337 | 5.235309 | 0.379379 | 0.704814 | 0.790318 | -6.97721 |
| ALS2         | 0.056416 | 5.144992 | 0.37898  | 0.70511  | 0.790357 | -6.97049 |
| DIS3L2       | -0.04944 | 4.601277 | -0.37858 | 0.705409 | 0.790628 | -6.91782 |
| PRICKLE1     | -0.18855 | 2.809395 | -0.37785 | 0.70595  | 0.790862 | -6.58555 |
| FAM18B2      | 0.075882 | 4.12381  | 0.377838 | 0.705957 | 0.790862 | -6.82155 |
| C1orf86      | 0.092041 | 4.604045 | 0.378144 | 0.70573  | 0.790862 | -6.90154 |

|           |          |          |          |          |          |          |
|-----------|----------|----------|----------|----------|----------|----------|
| FRMD6     | 0.225763 | 5.806817 | 0.378063 | 0.70579  | 0.790862 | -7.01743 |
| COPS7A    | 0.062458 | 5.931479 | 0.377975 | 0.705855 | 0.790862 | -7.03352 |
| NDUFS5    | 0.078281 | 6.192735 | 0.378032 | 0.705813 | 0.790862 | -7.04411 |
| PAPSS2    | 0.146398 | 4.651076 | 0.377626 | 0.706114 | 0.790975 | -6.89994 |
| N4BP1     | -0.08306 | 6.683922 | -0.3775  | 0.706205 | 0.791013 | -7.05411 |
| NMNAT3    | 0.142535 | 2.655065 | 0.376728 | 0.70678  | 0.791594 | -6.48713 |
| B4GALT5   | 0.091973 | 7.145218 | 0.376232 | 0.707148 | 0.791942 | -7.05115 |
| OSBPL10   | 0.11411  | 5.011376 | 0.376067 | 0.707271 | 0.792016 | -6.95093 |
| PPP4R2    | -0.06244 | 4.197144 | -0.37599 | 0.707329 | 0.792018 | -6.85986 |
| ERCC1     | -0.07335 | 5.000134 | -0.37578 | 0.707486 | 0.792067 | -6.96865 |
| MPDU1     | -0.07377 | 5.051145 | -0.3758  | 0.707466 | 0.792067 | -6.97367 |
| LOC90784  | 0.081079 | 4.189196 | 0.375565 | 0.707644 | 0.79218  | -6.83594 |
| SPAG17    | 0.363353 | 0.191026 | 0.375183 | 0.707927 | 0.792371 | -6.04421 |
| OLFML2A   | -0.12961 | 5.888489 | -0.37522 | 0.707903 | 0.792371 | -7.04064 |
| POLR2B    | 0.051456 | 6.835931 | 0.375048 | 0.708027 | 0.792419 | -7.05482 |
| MRPL19    | 0.047366 | 5.947176 | 0.374932 | 0.708114 | 0.792452 | -7.03615 |
| LOC407835 | -0.06371 | 2.781257 | -0.37467 | 0.708305 | 0.792539 | -6.55132 |
| ANKRD56   | -0.19181 | 2.726327 | -0.37472 | 0.708272 | 0.792539 | -6.5584  |
| GRINL1A   | 0.052993 | 5.766985 | 0.374424 | 0.70849  | 0.792683 | -7.02601 |
| C2orf60   | -0.05299 | 3.744622 | -0.37396 | 0.708833 | 0.793003 | -6.76694 |
| C11orf35  | 0.113732 | 1.351342 | 0.373116 | 0.709463 | 0.79358  | -6.25416 |
| BCAS4     | -0.09261 | 3.406089 | -0.37316 | 0.709432 | 0.79358  | -6.69915 |
| VSIG10    | -0.12615 | 4.441945 | -0.37234 | 0.710041 | 0.794164 | -6.90756 |
| STAMBPL1  | 0.140331 | 3.072396 | 0.372128 | 0.710196 | 0.794274 | -6.57524 |
| C20orf112 | 0.15646  | 5.442519 | 0.371626 | 0.71057  | 0.794628 | -6.99335 |
| MTHFSD    | 0.061993 | 3.88948  | 0.371448 | 0.710702 | 0.794713 | -6.77861 |
| NME3      | -0.09298 | 3.767715 | -0.37129 | 0.710821 | 0.794782 | -6.78134 |
| CLPP      | 0.062608 | 4.976836 | 0.371129 | 0.710939 | 0.79485  | -6.95435 |
| PIAS3     | 0.083179 | 5.838566 | 0.370914 | 0.711099 | 0.794966 | -7.03015 |
| TNPO1     | -0.05659 | 7.126322 | -0.36968 | 0.712016 | 0.795927 | -7.05166 |
| SLC24A6   | -0.07089 | 5.294412 | -0.3695  | 0.712152 | 0.795952 | -6.9997  |
| ADIPOR1   | -0.05724 | 7.327917 | -0.36956 | 0.712109 | 0.795952 | -7.04778 |
| NBR2      | -0.08842 | 3.028753 | -0.36937 | 0.712248 | 0.795958 | -6.61275 |
| SPTAN1    | -0.06222 | 8.66648  | -0.36934 | 0.712272 | 0.795958 | -7.00826 |
| IP6K2     | -0.05766 | 5.604829 | -0.36818 | 0.71313  | 0.796853 | -7.02411 |
| KCNK5     | -0.23443 | 3.597844 | -0.36778 | 0.713434 | 0.797129 | -6.76791 |
| DAD1      | 0.058797 | 6.279456 | 0.367146 | 0.713904 | 0.79759  | -7.05139 |
| GCFC1     | -0.06573 | 5.114582 | -0.36588 | 0.71485  | 0.798584 | -6.98361 |
| SHQ1      | 0.053533 | 4.059783 | 0.365332 | 0.715254 | 0.798919 | -6.81791 |
| VPS52     | -0.05395 | 6.105365 | -0.36532 | 0.715265 | 0.798919 | -7.04985 |
| UBE3A     | -0.0484  | 6.899142 | -0.36454 | 0.715846 | 0.799504 | -7.05726 |
| HP1BP3    | -0.04796 | 7.7553   | -0.36432 | 0.716006 | 0.799619 | -7.04007 |
| SEMA4A    | 0.154152 | 5.111894 | 0.364224 | 0.71608  | 0.799638 | -6.96347 |
| KIAA1919  | -0.06252 | 3.420105 | -0.36391 | 0.716315 | 0.799816 | -6.69876 |
| HDAC3     | -0.04895 | 5.091584 | -0.36386 | 0.716354 | 0.799816 | -6.98066 |
| ENDOD1    | 0.097739 | 6.031567 | 0.363511 | 0.716612 | 0.80004  | -7.04233 |
| HSF2      | -0.06014 | 3.716667 | -0.36327 | 0.716794 | 0.800116 | -6.76758 |
| COPE      | 0.058175 | 6.925109 | 0.363235 | 0.716818 | 0.800116 | -7.05854 |
| PHF3      | -0.0562  | 6.591092 | -0.36319 | 0.716852 | 0.800116 | -7.05944 |
| TAOK1     | -0.08651 | 5.071486 | -0.36284 | 0.717116 | 0.800347 | -6.98228 |
| KCTD20    | -0.0689  | 6.184641 | -0.36275 | 0.71718  | 0.800355 | -7.05355 |
| ZCCHC11   | -0.10775 | 5.312048 | -0.3625  | 0.717369 | 0.800502 | -7.00716 |
| FAM101B   | -0.10567 | 3.830708 | -0.36242 | 0.71743  | 0.800505 | -6.8016  |
| IMPACT    | -0.08966 | 5.258906 | -0.36225 | 0.717555 | 0.800582 | -7.00088 |
| ZNF18     | -0.0677  | 3.018804 | -0.36168 | 0.717975 | 0.800921 | -6.61009 |
| FAM118B   | -0.08671 | 3.590971 | -0.36175 | 0.717928 | 0.800921 | -6.74226 |
| ZDHHC1    | 0.108537 | 3.597275 | 0.361314 | 0.718251 | 0.801166 | -6.70668 |
| EIF1      | -0.09312 | 9.088762 | -0.36111 | 0.718407 | 0.801211 | -6.99526 |

|           |          |          |          |          |          |          |
|-----------|----------|----------|----------|----------|----------|----------|
| ASXL1     | 0.057661 | 6.630845 | 0.361167 | 0.718361 | 0.801211 | -7.05985 |
| HDAC9     | 0.20672  | 3.321606 | 0.360316 | 0.718996 | 0.801805 | -6.62525 |
| C5orf43   | -0.05325 | 5.941638 | -0.35998 | 0.71925  | 0.802024 | -7.04546 |
| PRSS3     | 0.42154  | 3.132739 | 0.359879 | 0.719322 | 0.802041 | -6.53468 |
| RMRP      | 0.106006 | 0.888531 | 0.359033 | 0.719954 | 0.802681 | -6.1867  |
| KCNK6     | 0.121982 | 4.864301 | 0.358827 | 0.720108 | 0.802724 | -6.93827 |
| SERPINB1  | -0.15225 | 7.155156 | -0.35884 | 0.720101 | 0.802724 | -7.05344 |
| ARMC2     | -0.08526 | 0.919623 | -0.35874 | 0.720171 | 0.802731 | -6.21906 |
| IL4R      | -0.09122 | 6.437779 | -0.35861 | 0.720271 | 0.802778 | -7.06021 |
| RPSAP58   | -0.07003 | 8.331586 | -0.35819 | 0.720584 | 0.803063 | -7.02389 |
| ABCD4     | -0.05777 | 4.276828 | -0.35778 | 0.720889 | 0.803339 | -6.87902 |
| PC        | 0.144245 | 5.143553 | 0.357684 | 0.720962 | 0.803356 | -6.96937 |
| FEM1B     | -0.06888 | 6.805474 | -0.35759 | 0.721031 | 0.803369 | -7.06066 |
| MRPS18B   | 0.060813 | 5.70122  | 0.357302 | 0.721247 | 0.803545 | -7.02738 |
| CACNG4    | -0.29984 | 0.616749 | -0.35708 | 0.721411 | 0.803664 | -6.20168 |
| TMEM51    | 0.106533 | 4.831701 | 0.356085 | 0.722157 | 0.804431 | -6.9364  |
| PHF15     | 0.111021 | 6.201355 | 0.355911 | 0.722287 | 0.804512 | -7.05148 |
| BCAM      | -0.15023 | 6.417722 | -0.35566 | 0.722474 | 0.804655 | -7.0616  |
| SLC37A1   | -0.15799 | 4.805129 | -0.35547 | 0.722614 | 0.804747 | -6.9619  |
| GTF2I     | -0.06628 | 7.145615 | -0.35524 | 0.722787 | 0.804876 | -7.05637 |
| EFHA1     | -0.06511 | 5.095589 | -0.35499 | 0.722973 | 0.805019 | -6.98536 |
| LOC284837 | 0.193875 | 1.216355 | 0.354471 | 0.723364 | 0.80539  | -6.23105 |
| PVRIG     | 0.108175 | 1.849987 | 0.354136 | 0.723615 | 0.805605 | -6.3513  |
| INPP4B    | 0.163636 | 3.64561  | 0.353569 | 0.724039 | 0.806013 | -6.70843 |
| SLC26A6   | 0.100628 | 4.137543 | 0.353346 | 0.724206 | 0.806135 | -6.82523 |
| DULLARD   | 0.047818 | 6.69895  | 0.353221 | 0.724299 | 0.806175 | -7.063   |
| MEPCE     | 0.064735 | 5.946033 | 0.35314  | 0.72436  | 0.806178 | -7.04328 |
| ZDHHC16   | 0.054245 | 4.7695   | 0.35287  | 0.724562 | 0.806256 | -6.936   |
| LOC647979 | -0.05407 | 8.66937  | -0.35284 | 0.724584 | 0.806256 | -7.01436 |
| POLR2J3   | 0.126579 | 5.623187 | 0.352815 | 0.724604 | 0.806256 | -7.0195  |
| DHX38     | -0.04272 | 5.902472 | -0.35255 | 0.724804 | 0.806415 | -7.04605 |
| ZNF672    | -0.05824 | 5.100083 | -0.35237 | 0.724938 | 0.8065   | -6.98647 |
| TRIM62    | 0.059027 | 3.88403  | 0.352082 | 0.725153 | 0.80661  | -6.78542 |
| GSTM4     | -0.16664 | 4.590755 | -0.35211 | 0.725133 | 0.80661  | -6.94032 |
| ANKRD54   | 0.049898 | 4.079759 | 0.351808 | 0.725358 | 0.80671  | -6.82866 |
| ELOVL7    | -0.13614 | 4.152716 | -0.35181 | 0.725356 | 0.80671  | -6.87188 |
| MYST2     | -0.04428 | 5.756873 | -0.35133 | 0.725714 | 0.807042 | -7.03905 |
| LOXL4     | 0.269911 | 2.166895 | 0.350639 | 0.726233 | 0.807555 | -6.38649 |
| HNF4G     | 0.38995  | 2.441498 | 0.350184 | 0.726574 | 0.807853 | -6.40443 |
| TMEM99    | 0.129303 | 3.14975  | 0.349987 | 0.726721 | 0.807853 | -6.60383 |
| CCDC94    | 0.063372 | 3.878409 | 0.350011 | 0.726704 | 0.807853 | -6.7826  |
| RPL10A    | -0.06218 | 8.158157 | -0.34997 | 0.726733 | 0.807853 | -7.03289 |
| CNBP      | 0.055396 | 8.305566 | 0.349676 | 0.726954 | 0.808035 | -7.03156 |
| HCG11     | 0.133469 | 3.721951 | 0.349478 | 0.727103 | 0.808132 | -6.73783 |
| CALM3     | 0.065433 | 7.816573 | 0.349406 | 0.727157 | 0.808132 | -7.04635 |
| PGM3      | 0.071505 | 4.703453 | 0.349291 | 0.727243 | 0.808163 | -6.92641 |
| C11orf93  | 0.217021 | 1.969578 | 0.348273 | 0.728006 | 0.808947 | -6.35573 |
| SPRED1    | -0.07206 | 5.754932 | -0.34776 | 0.728394 | 0.809313 | -7.04151 |
| CMKLR1    | -0.14002 | 2.443276 | -0.3476  | 0.728513 | 0.809382 | -6.5054  |
| ITGAV     | 0.09109  | 7.903957 | 0.347435 | 0.728634 | 0.809452 | -7.04537 |
| RASSF10   | 0.215014 | 1.769082 | 0.347242 | 0.728779 | 0.809542 | -6.31983 |
| LOC81691  | -0.09373 | 2.245976 | -0.34717 | 0.728831 | 0.809542 | -6.45423 |
| SIX2      | 0.332146 | 0.38028  | 0.346568 | 0.729285 | 0.809981 | -6.08436 |
| SLC35E3   | 0.083085 | 3.309009 | 0.346328 | 0.729465 | 0.810103 | -6.65268 |
| S100PBP   | -0.05228 | 4.474675 | -0.34619 | 0.729565 | 0.810103 | -6.91288 |
| ABCB10    | 0.056469 | 4.786949 | 0.346191 | 0.729568 | 0.810103 | -6.94137 |
| HSD17B2   | 0.347437 | 1.989917 | 0.34542  | 0.730146 | 0.810669 | -6.33265 |
| SEL1L3    | -0.1521  | 6.680502 | -0.34536 | 0.730194 | 0.810669 | -7.06535 |

|              |          |          |          |          |          |          |
|--------------|----------|----------|----------|----------|----------|----------|
| FAM32A       | 0.044621 | 5.83439  | 0.344972 | 0.730483 | 0.810925 | -7.04106 |
| PCDH12       | 0.122094 | 2.969586 | 0.344868 | 0.730561 | 0.810948 | -6.56619 |
| TUBB6        | -0.15548 | 6.34334  | -0.34471 | 0.730676 | 0.811011 | -7.06466 |
| C1orf201     | 0.084172 | 3.317343 | 0.344024 | 0.731194 | 0.811521 | -6.65344 |
| MRPL22       | 0.057588 | 4.271453 | 0.343904 | 0.731285 | 0.811558 | -6.866   |
| TMEM86A      | -0.11208 | 2.206012 | -0.34378 | 0.731381 | 0.811589 | -6.45393 |
| SNIP1        | -0.04467 | 3.976065 | -0.34368 | 0.731454 | 0.811589 | -6.8272  |
| RDH10        | -0.1088  | 5.838714 | -0.34363 | 0.731488 | 0.811589 | -7.04887 |
| YAF2         | -0.05092 | 3.956662 | -0.34323 | 0.731793 | 0.811863 | -6.82508 |
| CLCN4        | -0.22642 | 2.455072 | -0.3424  | 0.732416 | 0.812172 | -6.52282 |
| SLC16A14     | 0.165806 | 2.80018  | 0.342671 | 0.732211 | 0.812172 | -6.52806 |
| WNT4         | 0.190848 | 2.870023 | 0.342409 | 0.732408 | 0.812172 | -6.53465 |
| TSPAN9       | 0.101371 | 5.117736 | 0.342698 | 0.73219  | 0.812172 | -6.97709 |
| TFPI         | -0.1487  | 4.940668 | -0.34231 | 0.732478 | 0.812172 | -6.98129 |
| MXRA8        | -0.13544 | 5.310125 | -0.34246 | 0.732372 | 0.812172 | -7.01648 |
| KIAA0146     | 0.058205 | 5.566418 | 0.34234  | 0.732459 | 0.812172 | -7.02288 |
| LLGL1        | 0.073611 | 5.796311 | 0.342145 | 0.732606 | 0.812185 | -7.03837 |
| RIC8A        | 0.049405 | 6.171752 | 0.342214 | 0.732554 | 0.812185 | -7.05713 |
| SPOCK1       | 0.234817 | 3.257414 | 0.341743 | 0.732908 | 0.812455 | -6.61579 |
| KPNA3        | 0.050224 | 6.407794 | 0.34157  | 0.733038 | 0.812535 | -7.06373 |
| CETN3        | 0.063748 | 3.186458 | 0.341241 | 0.733285 | 0.812729 | -6.62958 |
| SF4          | 0.039495 | 4.17848  | 0.341182 | 0.733329 | 0.812729 | -6.8526  |
| CISD1        | -0.05991 | 4.28068  | -0.34103 | 0.73344  | 0.812788 | -6.88721 |
| ZCCHC3       | 0.060496 | 4.672019 | 0.340536 | 0.733815 | 0.813138 | -6.92812 |
| ZNF513       | -0.05641 | 3.971731 | -0.3403  | 0.733995 | 0.813209 | -6.82874 |
| CTNND1       | -0.06271 | 9.225361 | -0.34032 | 0.733975 | 0.813209 | -6.99869 |
| KATNAL2      | -0.14644 | 0.434049 | -0.34013 | 0.734121 | 0.813284 | -6.15727 |
| KLHL29       | 0.136002 | 3.452978 | 0.340011 | 0.734209 | 0.813318 | -6.68045 |
| TP53BP2      | -0.0508  | 6.217018 | -0.33987 | 0.734312 | 0.813367 | -7.06198 |
| SLC2A4RG     | 0.081329 | 6.151406 | 0.339791 | 0.734375 | 0.813372 | -7.05627 |
| CINP         | -0.05583 | 4.07817  | -0.33941 | 0.734661 | 0.813624 | -6.84956 |
| SEMA4D       | -0.08997 | 5.426198 | -0.3392  | 0.734821 | 0.813737 | -7.02341 |
| GPR183       | 0.140874 | 3.037049 | 0.33836  | 0.735452 | 0.814371 | -6.58484 |
| ATP6V1G1     | -0.05373 | 6.343892 | -0.33796 | 0.735751 | 0.814638 | -7.06549 |
| DECR2        | 0.083911 | 3.515642 | 0.337595 | 0.736027 | 0.814879 | -6.70011 |
| ZNF644       | -0.04843 | 5.848849 | -0.33751 | 0.736094 | 0.814888 | -7.04887 |
| LOC100132247 | -0.08772 | 5.375657 | -0.33731 | 0.736241 | 0.814914 | -7.01928 |
| C1S          | -0.15415 | 7.338134 | -0.33724 | 0.736292 | 0.814914 | -7.05718 |
| PIK3R2       | -0.06204 | 7.000056 | -0.33737 | 0.736194 | 0.814914 | -7.06514 |
| LOC220729    | 0.075221 | 3.391167 | 0.336814 | 0.736615 | 0.815142 | -6.67445 |
| OXSR1        | -0.06022 | 6.09417  | -0.33683 | 0.736605 | 0.815142 | -7.05964 |
| C3orf31      | -0.04923 | 2.464563 | -0.33657 | 0.736796 | 0.815149 | -6.49585 |
| STAT5A       | 0.098413 | 4.846143 | 0.3367   | 0.736701 | 0.815149 | -6.94736 |
| TOMM20       | -0.05899 | 7.758172 | -0.33661 | 0.736768 | 0.815149 | -7.04942 |
| RRP15        | 0.053931 | 4.874012 | 0.335967 | 0.737253 | 0.815589 | -6.95603 |
| HAUS4        | 0.062425 | 4.390504 | 0.335721 | 0.737438 | 0.815729 | -6.88846 |
| WDR73        | 0.051345 | 4.027557 | 0.335352 | 0.737716 | 0.815973 | -6.82179 |
| RSRC2        | 0.04047  | 5.649384 | 0.334854 | 0.738091 | 0.816323 | -7.03279 |
| SLC38A9      | 0.05854  | 3.208601 | 0.333945 | 0.738775 | 0.817015 | -6.63656 |
| LOC100009676 | 0.079088 | 2.069898 | 0.333706 | 0.738955 | 0.81715  | -6.40212 |
| SLFN12       | 0.123125 | 2.044823 | 0.333539 | 0.739082 | 0.817224 | -6.3911  |
| NMNAT2       | 0.168753 | 1.738495 | 0.333129 | 0.73939  | 0.817436 | -6.32747 |
| GRIP1        | 0.199769 | 2.341879 | 0.333137 | 0.739384 | 0.817436 | -6.43501 |
| UBA3         | -0.04434 | 5.417364 | -0.33178 | 0.740409 | 0.818498 | -7.02188 |
| CDK3         | 0.075018 | 2.452946 | 0.33137  | 0.740717 | 0.818767 | -6.47323 |
| SDK1         | 0.222725 | 4.287416 | 0.331299 | 0.74077  | 0.818767 | -6.84638 |
| TRIM22       | -0.13293 | 5.456313 | -0.33109 | 0.740926 | 0.818875 | -7.03138 |
| ZNF490       | -0.05247 | 3.434985 | -0.33029 | 0.741528 | 0.819476 | -6.71304 |

|           |          |          |          |          |          |          |
|-----------|----------|----------|----------|----------|----------|----------|
| TXNL4B    | 0.046888 | 4.001537 | 0.329965 | 0.741776 | 0.819685 | -6.81912 |
| TCF4      | 0.11211  | 5.877601 | 0.329628 | 0.74203  | 0.819901 | -7.04543 |
| COX6B1    | -0.06658 | 6.990427 | -0.32955 | 0.742091 | 0.819904 | -7.06783 |
| KIAA1804  | 0.107348 | 4.973715 | 0.329429 | 0.742181 | 0.819938 | -6.96199 |
| IKZF1     | -0.1411  | 3.123409 | -0.32935 | 0.742242 | 0.81994  | -6.66156 |
| NUDT22    | -0.05696 | 4.027798 | -0.32921 | 0.742345 | 0.819989 | -6.84221 |
| CAV2      | 0.134626 | 6.389114 | 0.328523 | 0.742865 | 0.820498 | -7.06593 |
| CHCHD6    | -0.07925 | 2.297093 | -0.32823 | 0.743083 | 0.820675 | -6.47098 |
| LYPD6     | 0.199808 | 2.058273 | 0.327768 | 0.743434 | 0.820933 | -6.37894 |
| NFATC2IP  | -0.04456 | 5.582709 | -0.3278  | 0.743408 | 0.820933 | -7.03576 |
| MPEG1     | -0.13562 | 3.872446 | -0.32725 | 0.743824 | 0.821298 | -6.82933 |
| COL9A2    | 0.190231 | 2.825125 | 0.327106 | 0.743934 | 0.821355 | -6.52363 |
| LIN52     | 0.066267 | 2.648363 | 0.326991 | 0.744021 | 0.821386 | -6.51627 |
| RPL27A    | 0.068813 | 8.088447 | 0.326043 | 0.744737 | 0.822111 | -7.04676 |
| ADAT2     | 0.072787 | 3.542161 | 0.325676 | 0.745014 | 0.822353 | -6.7107  |
| B4GALT7   | 0.055965 | 4.288346 | 0.324973 | 0.745546 | 0.822809 | -6.87464 |
| GLB1      | -0.0766  | 5.841855 | -0.32499 | 0.745536 | 0.822809 | -7.05373 |
| SFRS4     | -0.03985 | 6.391606 | -0.32462 | 0.745813 | 0.823039 | -7.07055 |
| CYTH2     | 0.053822 | 5.545292 | 0.324267 | 0.746079 | 0.823268 | -7.02745 |
| COPZ2     | -0.1619  | 2.149211 | -0.32379 | 0.746441 | 0.823537 | -6.46154 |
| LOC440944 | -0.076   | 3.671588 | -0.32384 | 0.7464   | 0.823537 | -6.77173 |
| MSTO2P    | 0.077034 | 2.176212 | 0.323679 | 0.746524 | 0.823563 | -6.42372 |
| ZNF8      | -0.06556 | 3.374576 | -0.32294 | 0.747085 | 0.824052 | -6.70474 |
| PDXP      | -0.08761 | 3.43416  | -0.32296 | 0.747067 | 0.824052 | -6.72122 |
| ATP6V1B2  | 0.051618 | 6.309715 | 0.322721 | 0.747248 | 0.824167 | -7.06767 |
| PUS7L     | 0.061554 | 3.666412 | 0.322522 | 0.747398 | 0.824196 | -6.74396 |
| STK17A    | -0.08538 | 5.47333  | -0.32245 | 0.747451 | 0.824196 | -7.03227 |
| LUC7L3    | -0.07681 | 6.900361 | -0.32246 | 0.747442 | 0.824196 | -7.07135 |
| ARRDC1    | 0.0756   | 5.750936 | 0.322241 | 0.747611 | 0.824307 | -7.04147 |
| LOC400927 | 0.091953 | 1.081652 | 0.322036 | 0.747766 | 0.824348 | -6.23163 |
| KIAA1274  | 0.112015 | 3.629684 | 0.322045 | 0.747759 | 0.824348 | -6.72828 |
| DENND2C   | 0.215024 | 3.164262 | 0.321953 | 0.747829 | 0.824352 | -6.60442 |
| CXorf57   | 0.169062 | 1.966577 | 0.321671 | 0.748042 | 0.824392 | -6.37415 |
| FAM129B   | 0.098617 | 8.603053 | 0.321677 | 0.748038 | 0.824392 | -7.03202 |
| MVP       | 0.08489  | 7.524305 | 0.321677 | 0.748038 | 0.824392 | -7.06279 |
| DNAH5     | 0.233764 | 1.041631 | 0.321278 | 0.74834  | 0.824525 | -6.20303 |
| ZCCHC9    | -0.05236 | 3.85752  | -0.32133 | 0.748299 | 0.824525 | -6.81013 |
| IKBKAP    | 0.043406 | 5.871546 | 0.321358 | 0.748279 | 0.824525 | -7.051   |
| FLT3LG    | 0.092426 | 1.973095 | 0.320465 | 0.748955 | 0.825115 | -6.38767 |
| SNX17     | -0.04287 | 6.350881 | -0.32041 | 0.748994 | 0.825115 | -7.07121 |
| TMC5      | -0.38253 | 4.095205 | -0.32029 | 0.749085 | 0.825151 | -6.90179 |
| ETV5      | 0.128835 | 4.686753 | 0.319618 | 0.749596 | 0.82563  | -6.92773 |
| ZFAND6    | 0.042442 | 5.453786 | 0.319562 | 0.749638 | 0.82563  | -7.02216 |
| FKBP7     | -0.08741 | 2.951155 | -0.31934 | 0.749803 | 0.825747 | -6.61464 |
| RALGPS2   | 0.088303 | 5.212122 | 0.319112 | 0.749979 | 0.825875 | -6.99596 |
| WDR59     | -0.042   | 5.178969 | -0.31898 | 0.750076 | 0.825917 | -7.00399 |
| PDLIM7    | 0.101032 | 6.11047  | 0.318877 | 0.750157 | 0.825941 | -7.06087 |
| CENPBD1   | 0.065433 | 3.58049  | 0.318232 | 0.750646 | 0.826377 | -6.72674 |
| NRP1      | 0.102148 | 6.080829 | 0.318198 | 0.750671 | 0.826377 | -7.05969 |
| PGAP1     | 0.103851 | 5.167454 | 0.317732 | 0.751024 | 0.8267   | -6.99016 |
| FAU       | 0.060879 | 7.097052 | 0.317516 | 0.751187 | 0.826815 | -7.07182 |
| COX7A2L   | -0.04802 | 5.578142 | -0.31711 | 0.751498 | 0.827092 | -7.039   |
| ESRP2     | 0.090592 | 6.402816 | 0.31699  | 0.751586 | 0.827124 | -7.07089 |
| ZNF673    | -0.06818 | 2.948179 | -0.31652 | 0.75194  | 0.827448 | -6.60951 |
| ENGASE    | 0.082268 | 4.294002 | 0.316228 | 0.752163 | 0.827609 | -6.87359 |
| SRP68     | 0.042802 | 6.375785 | 0.316174 | 0.752205 | 0.827609 | -7.07154 |
| CLCN7     | -0.04264 | 6.330022 | -0.3158  | 0.752486 | 0.827853 | -7.07228 |
| ZNF143    | 0.032602 | 4.154124 | 0.315686 | 0.752574 | 0.827885 | -6.85815 |

|            |          |          |          |          |          |          |
|------------|----------|----------|----------|----------|----------|----------|
| COL9A3     | 0.247352 | 1.468593 | 0.315569 | 0.752663 | 0.827917 | -6.27346 |
| MX2        | 0.134587 | 5.186939 | 0.315271 | 0.752889 | 0.828101 | -6.9901  |
| ODZ4       | -0.20796 | 3.587436 | -0.31458 | 0.753414 | 0.828613 | -6.79228 |
| AP3S1      | 0.058954 | 5.309959 | 0.314221 | 0.753685 | 0.828846 | -7.00956 |
| PROX1      | -0.22787 | 0.481785 | -0.31394 | 0.753896 | 0.829012 | -6.18252 |
| SDSL       | -0.11988 | 2.047422 | -0.31375 | 0.754042 | 0.829108 | -6.43094 |
| CDKN2AIPNL | 0.056585 | 3.321015 | 0.313624 | 0.754138 | 0.829148 | -6.66975 |
| AKR1C3     | -0.23953 | 5.974096 | -0.31336 | 0.754338 | 0.829303 | -7.0684  |
| UVRAG      | -0.05548 | 5.090657 | -0.31289 | 0.754692 | 0.829561 | -6.9982  |
| NFE2L1     | -0.05889 | 8.27066  | -0.31293 | 0.754667 | 0.829561 | -7.04149 |
| DACT2      | -0.27598 | 0.681337 | -0.3127  | 0.754836 | 0.829655 | -6.22353 |
| B9D1       | 0.078972 | 1.987351 | 0.31261  | 0.754907 | 0.829668 | -6.39416 |
| SNCA       | -0.17496 | 1.014373 | -0.31247 | 0.755015 | 0.829691 | -6.26439 |
| CPS1       | 0.345288 | 1.950839 | 0.312395 | 0.75507  | 0.829691 | -6.34514 |
| HFE        | 0.078742 | 2.782658 | 0.312346 | 0.755107 | 0.829691 | -6.54292 |
| NLGN2      | -0.12138 | 4.668826 | -0.31156 | 0.755704 | 0.830216 | -6.95895 |
| IMP3       | 0.055528 | 5.763408 | 0.311561 | 0.755703 | 0.830216 | -7.04707 |
| CTSH       | 0.115014 | 6.228583 | 0.311234 | 0.755951 | 0.830423 | -7.06709 |
| DDX1       | -0.0429  | 6.678168 | -0.31061 | 0.756425 | 0.830878 | -7.07721 |
| APBB1IP    | 0.151835 | 2.892156 | 0.310107 | 0.756807 | 0.831232 | -6.55715 |
| PCYT2      | 0.075883 | 4.954961 | 0.309863 | 0.756992 | 0.83127  | -6.97076 |
| NUCKS1     | 0.064663 | 8.587014 | 0.309827 | 0.757019 | 0.83127  | -7.03529 |
| LPCAT3     | -0.07208 | 6.557713 | -0.3099  | 0.756963 | 0.83127  | -7.07728 |
| LSM1       | 0.063731 | 4.407293 | 0.309501 | 0.757267 | 0.831476 | -6.89944 |
| ZC3H14     | -0.03939 | 5.865619 | -0.30891 | 0.757712 | 0.8319   | -7.0585  |
| TMEM187    | -0.06926 | 2.827243 | -0.30876 | 0.757832 | 0.831966 | -6.5833  |
| TMEM198    | -0.0955  | 1.392624 | -0.30824 | 0.758228 | 0.832282 | -6.31714 |
| ETV3       | -0.06741 | 3.604317 | -0.3081  | 0.758334 | 0.832282 | -6.7625  |
| PRPF40B    | -0.073   | 3.817    | -0.30806 | 0.758358 | 0.832282 | -6.8108  |
| SYDE1      | -0.09215 | 3.819282 | -0.3081  | 0.758332 | 0.832282 | -6.81716 |
| JOSD2      | -0.06908 | 3.680054 | -0.30796 | 0.758437 | 0.832303 | -6.77676 |
| DYNC111    | 0.200461 | 1.10171  | 0.307762 | 0.758588 | 0.832403 | -6.22837 |
| ST3GAL5    | -0.09899 | 2.438704 | -0.30741 | 0.758859 | 0.832582 | -6.50954 |
| GLI4       | 0.086921 | 3.300531 | 0.30739  | 0.75887  | 0.832582 | -6.66059 |
| CTSW       | -0.16918 | 0.801504 | -0.3073  | 0.75894  | 0.832594 | -6.23073 |
| LOH12CR1   | 0.063651 | 2.951367 | 0.306121 | 0.759835 | 0.833444 | -6.58779 |
| TAF1       | -0.05181 | 5.798348 | -0.30617 | 0.759796 | 0.833444 | -7.05647 |
| TAF1L      | -0.06718 | 0.972254 | -0.30475 | 0.760881 | 0.834299 | -6.24349 |
| MRPS14     | 0.044659 | 3.951364 | 0.304899 | 0.760764 | 0.834299 | -6.81677 |
| KIAA1430   | -0.0568  | 5.646387 | -0.3047  | 0.760913 | 0.834299 | -7.0483  |
| CA12       | 0.213394 | 6.496953 | 0.304912 | 0.760755 | 0.834299 | -7.07429 |
| CASC3      | -0.06585 | 6.932216 | -0.30486 | 0.760795 | 0.834299 | -7.07655 |
| TCTN1      | 0.087892 | 3.526178 | 0.304291 | 0.761226 | 0.834577 | -6.71518 |
| C21orf125  | 0.148694 | 1.177941 | 0.304071 | 0.761394 | 0.834696 | -6.24252 |
| PKD3       | -0.08475 | 3.509977 | -0.30377 | 0.761625 | 0.834743 | -6.74658 |
| PLXNB3     | -0.17767 | 4.19358  | -0.30371 | 0.761668 | 0.834743 | -6.90306 |
| CNOT1      | -0.05322 | 8.485137 | -0.3037  | 0.761676 | 0.834743 | -7.03704 |
| ANKRD27    | 0.054448 | 5.859256 | 0.30386  | 0.761555 | 0.834743 | -7.05534 |
| PRDXDD1P   | -0.08122 | 0.509007 | -0.30339 | 0.76191  | 0.834934 | -6.17015 |
| TM9SF2     | -0.05972 | 7.455333 | -0.30274 | 0.762409 | 0.835416 | -7.06742 |
| CHID1      | -0.04882 | 5.576868 | -0.30248 | 0.762605 | 0.835535 | -7.04351 |
| IARS       | -0.05049 | 7.653473 | -0.30244 | 0.762638 | 0.835535 | -7.06312 |
| EXOSC6     | 0.05403  | 4.025339 | 0.30194  | 0.763016 | 0.835883 | -6.83255 |
| MS4A6A     | 0.129782 | 3.476976 | 0.301499 | 0.763351 | 0.836185 | -6.69656 |
| DNAJC22    | -0.24944 | 1.258087 | -0.30137 | 0.763447 | 0.836225 | -6.31267 |
| EPHA10     | -0.2521  | 0.711532 | -0.3008  | 0.763884 | 0.836638 | -6.22569 |
| LY6G5B     | 0.067353 | 1.703188 | 0.300204 | 0.764338 | 0.836961 | -6.34836 |
| ZNF419     | -0.08422 | 1.755793 | -0.30018 | 0.764359 | 0.836961 | -6.38251 |



|           |          |          |          |          |          |          |
|-----------|----------|----------|----------|----------|----------|----------|
| CCNL2     | 0.061429 | 6.531606 | 0.300216 | 0.764328 | 0.836961 | -7.07889 |
| STX11     | 0.127319 | 2.778899 | 0.299556 | 0.764831 | 0.837412 | -6.54454 |
| VEGFC     | 0.136111 | 2.657223 | 0.299301 | 0.765025 | 0.837428 | -6.51663 |
| LOC148413 | -0.04632 | 3.630065 | -0.2994  | 0.764951 | 0.837428 | -6.76494 |
| STX3      | -0.08249 | 5.476616 | -0.29937 | 0.76497  | 0.837428 | -7.039   |
| GLI1      | 0.200807 | 1.073838 | 0.298946 | 0.765296 | 0.837611 | -6.22354 |
| PLRG1     | 0.042906 | 5.104733 | 0.298846 | 0.765372 | 0.837611 | -6.9949  |
| MAP7D1    | 0.077736 | 7.136298 | 0.298916 | 0.765319 | 0.837611 | -7.07715 |
| UTP15     | -0.04722 | 3.964265 | -0.29844 | 0.765683 | 0.837819 | -6.83906 |
| SPSB1     | 0.093174 | 5.764596 | 0.298504 | 0.765633 | 0.837819 | -7.04935 |
| EFS       | -0.21329 | 3.924258 | -0.29749 | 0.766406 | 0.83848  | -6.86644 |
| PLAT      | 0.123568 | 6.131805 | 0.29752  | 0.766382 | 0.83848  | -7.06743 |
| C3orf14   | -0.17541 | 1.030783 | -0.29735 | 0.766511 | 0.838529 | -6.27424 |
| AADAT     | -0.12884 | 2.085931 | -0.29717 | 0.766646 | 0.838568 | -6.45203 |
| FOXRED1   | -0.07025 | 4.166199 | -0.29715 | 0.766667 | 0.838568 | -6.88211 |
| CCR1      | 0.126067 | 2.209686 | 0.29683  | 0.766909 | 0.838739 | -6.43303 |
| VAMP3     | -0.04275 | 6.798414 | -0.29678 | 0.766944 | 0.838739 | -7.08079 |
| FAM116B   | -0.06914 | 2.541651 | -0.29562 | 0.767834 | 0.839643 | -6.52835 |
| KDM5A     | 0.048574 | 6.579268 | 0.295543 | 0.76789  | 0.839643 | -7.08094 |
| HELZ      | -0.04692 | 6.478361 | -0.29507 | 0.768254 | 0.839976 | -7.08094 |
| CBLL1     | 0.044798 | 5.322249 | 0.294944 | 0.768347 | 0.840011 | -7.01774 |
| SAP30     | -0.06625 | 3.071309 | -0.29428 | 0.768856 | 0.840436 | -6.64465 |
| C6orf47   | -0.04443 | 4.693859 | -0.29432 | 0.76882  | 0.840436 | -6.95748 |
| EEF1B2    | -0.05879 | 6.096845 | -0.29419 | 0.768922 | 0.840442 | -7.07313 |
| LMNA      | -0.05904 | 9.128009 | -0.29406 | 0.769019 | 0.840483 | -7.01686 |
| EP300     | -0.04152 | 7.648251 | -0.29362 | 0.769358 | 0.840787 | -7.0661  |
| PGBD2     | 0.060491 | 2.774496 | 0.293312 | 0.769591 | 0.840977 | -6.55325 |
| ZNF251    | 0.067587 | 3.599232 | 0.292518 | 0.770198 | 0.841574 | -6.73738 |
| NFRKB     | -0.04743 | 5.332253 | -0.29244 | 0.770258 | 0.841574 | -7.02685 |
| VASH1     | 0.081288 | 4.254283 | 0.292313 | 0.770355 | 0.841614 | -6.8763  |
| ZNF562    | -0.05419 | 4.990929 | -0.29191 | 0.770661 | 0.841783 | -6.99392 |
| KIF16B    | 0.072551 | 5.317017 | 0.291873 | 0.77069  | 0.841783 | -7.01558 |
| WBSCR16   | 0.041994 | 5.351645 | 0.291977 | 0.770611 | 0.841783 | -7.0216  |
| IGHMBP2   | -0.0884  | 4.871911 | -0.29155 | 0.770937 | 0.841986 | -6.9841  |
| ACP1      | 0.043017 | 5.925688 | 0.291178 | 0.771221 | 0.84223  | -7.06302 |
| NKX6-1    | 0.182616 | 0.17402  | 0.290993 | 0.771362 | 0.842319 | -6.09421 |
| INPP1     | 0.086973 | 4.81974  | 0.290295 | 0.771895 | 0.842703 | -6.95987 |
| KLHL24    | -0.07511 | 6.384595 | -0.29038 | 0.771827 | 0.842703 | -7.08146 |
| CUL4A     | -0.05204 | 6.62073  | -0.29035 | 0.771851 | 0.842703 | -7.08324 |
| WASH3P    | 0.047458 | 4.207118 | 0.290096 | 0.772047 | 0.842738 | -6.87248 |
| POSTN     | 0.162236 | 7.096067 | 0.290115 | 0.772033 | 0.842738 | -7.0814  |
| TBC1D3    | 0.06885  | 4.14021  | 0.289616 | 0.772414 | 0.843072 | -6.85621 |
| NELL2     | 0.283148 | 2.582085 | 0.289373 | 0.7726   | 0.843209 | -6.47863 |
| PRDM10    | -0.03698 | 4.380875 | -0.28894 | 0.772928 | 0.843369 | -6.91512 |
| GNL1      | 0.037594 | 5.341178 | 0.288947 | 0.772925 | 0.843369 | -7.02188 |
| TXLNA     | -0.03972 | 6.27143  | -0.28907 | 0.772834 | 0.843369 | -7.07906 |
| RILPL1    | -0.07363 | 3.378376 | -0.28859 | 0.773195 | 0.843544 | -6.72114 |
| ASF1A     | -0.05726 | 4.492855 | -0.28857 | 0.77321  | 0.843544 | -6.93422 |
| TNFRSF1A  | 0.051753 | 7.09455  | 0.288497 | 0.773269 | 0.843544 | -7.08051 |
| GNB5      | -0.06041 | 4.391155 | -0.2878  | 0.773805 | 0.844063 | -6.92109 |
| LGR6      | -0.24895 | 1.937605 | -0.28709 | 0.774346 | 0.84439  | -6.44432 |
| C2orf43   | -0.06293 | 4.353106 | -0.28714 | 0.774305 | 0.84439  | -6.91431 |
| MARVELD2  | -0.08777 | 4.38413  | -0.2871  | 0.774338 | 0.84439  | -6.91987 |
| CISD3     | -0.07015 | 4.788185 | -0.28714 | 0.774304 | 0.84439  | -6.97307 |
| SSR3      | 0.045218 | 7.50757  | 0.286795 | 0.77457  | 0.844568 | -7.07299 |
| CRCP      | -0.05045 | 5.512584 | -0.2866  | 0.774721 | 0.844666 | -7.04364 |
| TRADD     | 0.056199 | 4.734285 | 0.28648  | 0.774811 | 0.844699 | -6.95302 |
| RHOF      | -0.15377 | 4.441146 | -0.28626 | 0.774979 | 0.844816 | -6.93788 |

|            |          |          |          |          |          |          |
|------------|----------|----------|----------|----------|----------|----------|
| ACP2       | 0.048883 | 5.44126  | 0.286079 | 0.775117 | 0.844901 | -7.03057 |
| SLC38A5    | -0.17533 | 3.552017 | -0.28594 | 0.775221 | 0.844948 | -6.77446 |
| TSSK3      | -0.08764 | 0.666759 | -0.2854  | 0.775638 | 0.845167 | -6.20126 |
| MAP1D      | -0.06171 | 1.750229 | -0.28541 | 0.775629 | 0.845167 | -6.38078 |
| RNF5P1     | -0.0798  | 2.047721 | -0.28513 | 0.775845 | 0.845167 | -6.43634 |
| RRAGD      | 0.137216 | 3.227458 | 0.285156 | 0.775823 | 0.845167 | -6.64886 |
| HBXIP      | 0.043804 | 5.911688 | 0.285246 | 0.775755 | 0.845167 | -7.06403 |
| RAI1       | -0.05412 | 6.873793 | -0.28516 | 0.775819 | 0.845167 | -7.08325 |
| MPZL2      | 0.113999 | 6.597175 | 0.285551 | 0.775522 | 0.845167 | -7.08339 |
| ALDH1A3    | -0.1314  | 4.846204 | -0.28483 | 0.776076 | 0.845352 | -6.98855 |
| FAM49A     | -0.11077 | 1.767597 | -0.28455 | 0.776291 | 0.84552  | -6.39373 |
| GNG4       | -0.24367 | 1.722494 | -0.28436 | 0.776434 | 0.845562 | -6.4101  |
| NDUFA9     | 0.049365 | 5.780321 | 0.284337 | 0.77645  | 0.845562 | -7.05654 |
| EIF3D      | 0.041247 | 7.539286 | 0.284134 | 0.776605 | 0.845665 | -7.07301 |
| EHD3       | 0.123993 | 4.015789 | 0.283925 | 0.776765 | 0.845774 | -6.82861 |
| LOC202781  | -0.07844 | 2.78413  | -0.28338 | 0.777181 | 0.84616  | -6.5851  |
| FDX1L      | 0.049577 | 2.795651 | 0.283279 | 0.777259 | 0.84618  | -6.56335 |
| GYS1       | -0.0487  | 6.555521 | -0.28288 | 0.777567 | 0.846448 | -7.08517 |
| THAP11     | 0.043128 | 4.992249 | 0.282666 | 0.777729 | 0.846559 | -6.98731 |
| Orai3      | -0.06854 | 4.180082 | -0.2822  | 0.778089 | 0.846884 | -6.89057 |
| C9orf98    | -0.132   | -0.0356  | -0.28201 | 0.778235 | 0.846977 | -6.10359 |
| IKBKB      | 0.057807 | 5.406512 | 0.281833 | 0.778367 | 0.847055 | -7.02808 |
| DACH1      | -0.19379 | 1.568295 | -0.28173 | 0.778443 | 0.847072 | -6.36985 |
| CATSPER2P1 | -0.05405 | 0.575143 | -0.28133 | 0.778754 | 0.847344 | -6.18359 |
| RARA       | -0.06591 | 5.6316   | -0.28103 | 0.778983 | 0.84745  | -7.05464 |
| PPIL2      | -0.03848 | 5.817331 | -0.28096 | 0.779033 | 0.84745  | -7.06416 |
| ACSL4      | -0.0715  | 6.693295 | -0.28106 | 0.778961 | 0.84745  | -7.08581 |
| C7orf49    | -0.0481  | 4.73992  | -0.28021 | 0.779606 | 0.848007 | -6.96737 |
| ACTR3B     | 0.067787 | 2.46943  | 0.280047 | 0.779735 | 0.848081 | -6.49308 |
| NOM1       | 0.051609 | 4.968942 | 0.27935  | 0.780269 | 0.848596 | -6.98453 |
| EFR3A      | 0.049183 | 6.982209 | 0.279261 | 0.780337 | 0.848604 | -7.08469 |
| C5orf62    | 0.082625 | 4.154172 | 0.278438 | 0.780968 | 0.849171 | -6.85967 |
| GATAD1     | -0.0674  | 5.408373 | -0.27834 | 0.781041 | 0.849171 | -7.03887 |
| GTF3A      | 0.06875  | 6.190654 | 0.278394 | 0.781001 | 0.849171 | -7.07693 |
| COTL1      | 0.090591 | 6.697592 | 0.277755 | 0.781491 | 0.849595 | -7.08665 |
| C9orf169   | 0.257131 | 1.376157 | 0.277185 | 0.781928 | 0.850003 | -6.2701  |
| C9orf129   | -0.06787 | 2.091827 | -0.27689 | 0.782154 | 0.850184 | -6.44496 |
| DTX1       | -0.10503 | 2.051892 | -0.27671 | 0.782292 | 0.850267 | -6.44487 |
| DPM3       | -0.06833 | 3.550629 | -0.2762  | 0.782682 | 0.850625 | -6.75713 |
| CTXN1      | 0.131128 | 1.963628 | 0.275833 | 0.782965 | 0.850676 | -6.39631 |
| PLA2G4F    | 0.224992 | 2.904537 | 0.276046 | 0.782802 | 0.850676 | -6.54615 |
| ZNF260     | -0.07012 | 4.690581 | -0.27588 | 0.782929 | 0.850676 | -6.96561 |
| RPL10      | 0.058195 | 8.349401 | 0.275822 | 0.782973 | 0.850676 | -7.05322 |
| ZFP62      | -0.05468 | 4.761691 | -0.27543 | 0.783275 | 0.850806 | -6.9721  |
| REPS1      | 0.045214 | 5.635299 | 0.275569 | 0.783167 | 0.850806 | -7.0495  |
| CLPTM1L    | 0.052905 | 6.753439 | 0.275437 | 0.783269 | 0.850806 | -7.08748 |
| ZNF48      | -0.05515 | 2.935742 | -0.27529 | 0.783378 | 0.850852 | -6.61679 |
| ACTN1      | 0.077863 | 8.52168  | 0.27507  | 0.78355  | 0.850973 | -7.04818 |
| CCR7       | 0.15559  | 1.025843 | 0.274568 | 0.783935 | 0.851325 | -6.22845 |
| SPTBN5     | -0.11973 | 2.402483 | -0.27447 | 0.784011 | 0.851341 | -6.51478 |
| CTBP1      | 0.04133  | 6.798327 | 0.273863 | 0.784476 | 0.85178  | -7.08776 |
| USP6       | 0.066875 | 0.347427 | 0.273307 | 0.784903 | 0.852177 | -6.13453 |
| DNASE1L1   | -0.04859 | 4.653285 | -0.27299 | 0.785149 | 0.852194 | -6.95824 |
| CCDC72     | -0.04998 | 4.805135 | -0.27297 | 0.785163 | 0.852194 | -6.97746 |
| ZNF322A    | -0.06331 | 4.835247 | -0.273   | 0.785139 | 0.852194 | -6.98282 |
| RBM3       | 0.050771 | 6.840423 | 0.273147 | 0.785026 | 0.852194 | -7.08775 |
| ZNF678     | 0.069953 | 1.779004 | 0.272881 | 0.78523  | 0.852201 | -6.36887 |
| VDAC2      | -0.05675 | 6.795575 | -0.27266 | 0.785398 | 0.852317 | -7.08756 |

|              |          |          |          |          |          |          |
|--------------|----------|----------|----------|----------|----------|----------|
| NLRC3        | -0.09684 | 2.25555  | -0.27243 | 0.785577 | 0.852379 | -6.48356 |
| ALG1         | -0.05229 | 4.505742 | -0.27248 | 0.785538 | 0.852379 | -6.93874 |
| VCPIP1       | 0.044218 | 5.58331  | 0.272268 | 0.785701 | 0.852447 | -7.04658 |
| NUP214       | 0.037696 | 6.826101 | 0.271868 | 0.786008 | 0.852714 | -7.08812 |
| TXNL4A       | -0.04929 | 4.910765 | -0.27178 | 0.786077 | 0.852722 | -6.99035 |
| RASSF4       | 0.096167 | 3.828503 | 0.271561 | 0.786244 | 0.852837 | -6.7894  |
| FRMD4B       | -0.07148 | 5.370922 | -0.27142 | 0.786354 | 0.85289  | -7.0379  |
| LIME1        | 0.107715 | 2.934215 | 0.271266 | 0.78647  | 0.852951 | -6.58121 |
| FAM173B      | -0.0561  | 3.255874 | -0.27065 | 0.786946 | 0.853401 | -6.69065 |
| CEP192       | -0.05158 | 5.397994 | -0.2703  | 0.787208 | 0.853618 | -7.03892 |
| ZFP90        | -0.05749 | 4.483981 | -0.26975 | 0.787637 | 0.854017 | -6.93863 |
| EDF1         | -0.0483  | 6.655749 | -0.2695  | 0.787828 | 0.854157 | -7.08913 |
| BLVRA        | 0.085229 | 4.556646 | 0.269239 | 0.788027 | 0.854307 | -6.93264 |
| NEFL         | -0.32589 | 0.806458 | -0.26816 | 0.78886  | 0.855011 | -6.26809 |
| IL17RB       | 0.181174 | 2.630916 | 0.268212 | 0.788816 | 0.855011 | -6.50617 |
| ZC3H4        | 0.029014 | 6.305157 | 0.268306 | 0.788744 | 0.855011 | -7.08413 |
| NDUFB5       | -0.04763 | 6.075456 | -0.26739 | 0.789445 | 0.85558  | -7.07956 |
| ZNF883       | 0.186112 | 0.291724 | 0.26708  | 0.789686 | 0.855708 | -6.11366 |
| C21orf7      | 0.078298 | 1.547888 | 0.267145 | 0.789637 | 0.855708 | -6.3305  |
| TMEM20       | -0.10122 | 2.940738 | -0.26672 | 0.789961 | 0.855938 | -6.62855 |
| DHX40        | -0.0434  | 5.85905  | -0.26664 | 0.790021 | 0.855938 | -7.0705  |
| LOC100129637 | -0.05536 | 3.466193 | -0.26537 | 0.791003 | 0.856863 | -6.73932 |
| AVPI1        | -0.08401 | 4.572901 | -0.26534 | 0.791028 | 0.856863 | -6.9537  |
| KIAA1522     | -0.06146 | 8.247171 | -0.26529 | 0.791059 | 0.856863 | -7.05586 |
| DHFRL1       | -0.0578  | 3.038657 | -0.26516 | 0.79116  | 0.856906 | -6.64216 |
| LRP12        | 0.148526 | 3.944954 | 0.264716 | 0.791504 | 0.857117 | -6.81091 |
| ZBTB45       | 0.048695 | 4.397084 | 0.264671 | 0.791539 | 0.857117 | -6.91299 |
| RBMS1        | -0.07412 | 5.683899 | -0.26469 | 0.791526 | 0.857117 | -7.06309 |
| ZMAT2        | -0.03815 | 5.400944 | -0.26439 | 0.791755 | 0.857218 | -7.03997 |
| CES2         | 0.110487 | 6.641029 | 0.264445 | 0.791713 | 0.857218 | -7.08968 |
| INPP5F       | 0.045672 | 4.677165 | 0.264197 | 0.791904 | 0.857246 | -6.95384 |
| C2orf69      | -0.03841 | 4.833978 | -0.26423 | 0.791881 | 0.857246 | -6.98228 |
| ZNF341       | 0.045334 | 3.006006 | 0.263859 | 0.792163 | 0.857461 | -6.61435 |
| KIAA0664P3   | 0.059931 | 2.07969  | 0.263505 | 0.792437 | 0.857491 | -6.42562 |
| HEBP1        | -0.04676 | 4.758846 | -0.26357 | 0.792388 | 0.857491 | -6.97457 |
| BCL7C        | 0.054756 | 5.040661 | 0.263576 | 0.792382 | 0.857491 | -6.99677 |
| SUN1         | 0.04038  | 7.336546 | 0.26366  | 0.792317 | 0.857491 | -7.08281 |
| PKDCC        | 0.217437 | 3.682012 | 0.263166 | 0.792697 | 0.857706 | -6.73449 |
| ARHGAP9      | 0.107133 | 2.271775 | 0.262578 | 0.793149 | 0.858063 | -6.45549 |
| ABTB2        | 0.103695 | 4.28014  | 0.262614 | 0.793122 | 0.858063 | -6.88355 |
| SAMD12       | 0.149997 | 4.793249 | 0.262169 | 0.793464 | 0.858337 | -6.95637 |
| PRR14        | 0.035147 | 5.322188 | 0.261699 | 0.793827 | 0.858663 | -7.02772 |
| NCF4         | 0.094606 | 1.999314 | 0.261391 | 0.794063 | 0.858852 | -6.40959 |
| ENC1         | 0.126949 | 5.523616 | 0.260978 | 0.794381 | 0.85913  | -7.03796 |
| APOL3        | -0.10568 | 3.863771 | -0.26004 | 0.795105 | 0.859846 | -6.84087 |
| SYNE2        | 0.062537 | 8.101732 | 0.25907  | 0.795851 | 0.860586 | -7.06573 |
| OR2A9P       | 0.091437 | 2.237388 | 0.258982 | 0.795919 | 0.860593 | -6.45235 |
| RASAL3       | 0.102277 | 2.498857 | 0.258806 | 0.796054 | 0.860673 | -6.49973 |
| SWAP70       | 0.044547 | 6.080731 | 0.258389 | 0.796376 | 0.860954 | -7.07908 |
| CDAN1        | 0.038271 | 4.071747 | 0.257558 | 0.797016 | 0.861579 | -6.85609 |
| INF2         | -0.06586 | 7.501709 | -0.25738 | 0.797156 | 0.861664 | -7.07893 |
| RNF215       | 0.050814 | 2.145045 | 0.257108 | 0.797364 | 0.861821 | -6.44226 |
| PIGY         | 0.037943 | 5.786641 | 0.256843 | 0.797568 | 0.861975 | -7.06511 |
| PCNP         | -0.03396 | 6.529172 | -0.25603 | 0.798198 | 0.862589 | -7.09209 |
| GOLGA5       | -0.03308 | 5.827879 | -0.25577 | 0.798396 | 0.86273  | -7.07116 |
| SLC35C1      | -0.06657 | 5.801771 | -0.2557  | 0.798452 | 0.86273  | -7.07135 |
| TMEM126B     | -0.04821 | 4.275211 | -0.25559 | 0.798532 | 0.862751 | -6.90866 |
| FRAS1        | 0.178188 | 3.95665  | 0.255249 | 0.798797 | 0.86297  | -6.81116 |

|              |          |          |          |          |          |          |
|--------------|----------|----------|----------|----------|----------|----------|
| POLR2E       | 0.038165 | 6.448979 | 0.255084 | 0.798924 | 0.86304  | -7.09043 |
| CCDC73       | 0.061941 | 1.579068 | 0.254745 | 0.799185 | 0.863082 | -6.34104 |
| NAF1         | -0.04179 | 3.869898 | -0.25487 | 0.79909  | 0.863082 | -6.8312  |
| PTPRC        | 0.119936 | 4.65733  | 0.254907 | 0.79906  | 0.863082 | -6.94504 |
| PAG1         | 0.095126 | 4.912533 | 0.254676 | 0.799238 | 0.863082 | -6.97865 |
| PTP4A1       | 0.058459 | 7.91856  | 0.254634 | 0.799271 | 0.863082 | -7.07206 |
| TUSC3        | 0.16471  | 3.717426 | 0.254419 | 0.799437 | 0.863194 | -6.76114 |
| C14orf2      | 0.046129 | 5.778618 | 0.254339 | 0.799498 | 0.863194 | -7.06467 |
| CACNA2D4     | -0.08853 | 0.551181 | -0.25409 | 0.799691 | 0.863335 | -6.19111 |
| SPDYE5       | -0.07648 | 0.394678 | -0.25392 | 0.799824 | 0.863345 | -6.16511 |
| RBM27        | 0.033395 | 5.649058 | 0.253918 | 0.799823 | 0.863345 | -7.05695 |
| CHSY1        | -0.05005 | 5.71355  | -0.25334 | 0.800272 | 0.863762 | -7.06632 |
| ZNF680       | -0.06689 | 3.577479 | -0.25312 | 0.800436 | 0.863872 | -6.7701  |
| IMPDH1       | -0.06565 | 5.985269 | -0.25278 | 0.800704 | 0.864095 | -7.08055 |
| USP11        | 0.050907 | 6.155679 | 0.252473 | 0.800938 | 0.864281 | -7.08321 |
| BOLA1        | 0.059493 | 2.327198 | 0.25228  | 0.801087 | 0.864374 | -6.47492 |
| CD40         | 0.109753 | 3.222031 | 0.252007 | 0.801298 | 0.864411 | -6.6567  |
| STK38L       | -0.05861 | 6.145323 | -0.252   | 0.801306 | 0.864411 | -7.0862  |
| SEC23B       | -0.04472 | 6.30983  | -0.25212 | 0.801211 | 0.864411 | -7.08995 |
| RPS6KB2      | -0.05408 | 5.551625 | -0.25176 | 0.801488 | 0.86454  | -7.05606 |
| C9orf21      | -0.05884 | 3.060672 | -0.25103 | 0.802052 | 0.865025 | -6.65219 |
| ITPR1PL2     | -0.04718 | 6.716682 | -0.25102 | 0.802061 | 0.865025 | -7.09378 |
| GPR161       | 0.112641 | 2.941576 | 0.250754 | 0.802265 | 0.865178 | -6.59425 |
| TBX6         | 0.113602 | 1.848969 | 0.250173 | 0.802714 | 0.865595 | -6.38241 |
| C5orf51      | 0.043463 | 6.055159 | 0.250038 | 0.802818 | 0.865641 | -7.08019 |
| ABHD10       | -0.04247 | 4.772313 | -0.24978 | 0.803015 | 0.865786 | -6.97844 |
| CD180        | -0.11509 | 1.219854 | -0.24969 | 0.803086 | 0.865796 | -6.30847 |
| IL1R2        | -0.15572 | 3.088424 | -0.24956 | 0.803191 | 0.865842 | -6.67492 |
| TANK         | 0.037947 | 5.525277 | 0.249207 | 0.80346  | 0.866065 | -7.04849 |
| AIMP1        | -0.02877 | 5.549942 | -0.24904 | 0.803592 | 0.866141 | -7.05499 |
| TPP2         | -0.0394  | 5.785471 | -0.24841 | 0.804075 | 0.866594 | -7.0711  |
| GPKOW        | 0.035453 | 4.036231 | 0.248287 | 0.80417  | 0.866631 | -6.85243 |
| EIF3J        | 0.03693  | 6.428725 | 0.248073 | 0.804336 | 0.866742 | -7.09184 |
| OBSCN        | -0.09105 | 4.721773 | -0.24792 | 0.804451 | 0.8668   | -6.9795  |
| BRF1         | -0.03343 | 5.06165  | -0.24749 | 0.804789 | 0.867097 | -7.01131 |
| PRR22        | 0.081376 | 0.730441 | 0.247331 | 0.804909 | 0.867159 | -6.19685 |
| RC3H2        | -0.04949 | 5.33069  | -0.24713 | 0.805068 | 0.867264 | -7.03905 |
| C11orf51     | 0.067107 | 4.108364 | 0.246944 | 0.805209 | 0.867286 | -6.86217 |
| RTN4         | -0.04296 | 7.974951 | -0.24694 | 0.805213 | 0.867286 | -7.06984 |
| PRRG1        | 0.09128  | 3.582368 | 0.246779 | 0.805336 | 0.867351 | -6.74084 |
| ADCK2        | 0.050106 | 4.682682 | 0.246308 | 0.8057   | 0.867677 | -6.95829 |
| UPF1         | -0.03201 | 7.452889 | -0.24623 | 0.805762 | 0.867677 | -7.0835  |
| TRIM45       | 0.067988 | 2.105364 | 0.246001 | 0.805937 | 0.867798 | -6.43505 |
| LRRC56       | 0.084822 | 1.579086 | 0.245484 | 0.806337 | 0.867961 | -6.33757 |
| DNAL4        | 0.049686 | 3.3487   | 0.245696 | 0.806173 | 0.867961 | -6.69441 |
| FZD1         | -0.07814 | 5.4736   | -0.24553 | 0.806301 | 0.867961 | -7.05377 |
| ID1          | 0.091352 | 6.467384 | 0.245626 | 0.806227 | 0.867961 | -7.09225 |
| MRI1         | -0.06075 | 4.499037 | -0.2451  | 0.806634 | 0.86808  | -6.94684 |
| C11orf68     | -0.04189 | 4.932326 | -0.24523 | 0.806529 | 0.86808  | -6.99875 |
| CHPF2        | 0.043707 | 6.23245  | 0.245114 | 0.806623 | 0.86808  | -7.08773 |
| USP7         | 0.030912 | 7.228651 | 0.244917 | 0.806775 | 0.868166 | -7.08948 |
| BAT4         | -0.03955 | 3.306175 | -0.2441  | 0.807406 | 0.868777 | -6.70459 |
| LOC100272228 | 0.075098 | 0.784588 | 0.243858 | 0.807594 | 0.868913 | -6.20707 |
| GLTSCR1      | -0.03201 | 5.430238 | -0.24366 | 0.807749 | 0.868984 | -7.04717 |
| RPSA         | -0.04769 | 6.444234 | -0.24361 | 0.807785 | 0.868984 | -7.0944  |
| DFNA5        | 0.152218 | 3.091735 | 0.243062 | 0.80821  | 0.869331 | -6.62344 |
| PKN2         | 0.037493 | 6.402941 | 0.243034 | 0.808232 | 0.869331 | -7.09259 |
| MST1R        | -0.13139 | 5.399262 | -0.24277 | 0.808433 | 0.869481 | -7.05105 |

|           |          |          |          |          |          |          |
|-----------|----------|----------|----------|----------|----------|----------|
| RFX3      | -0.07555 | 1.629206 | -0.24251 | 0.808637 | 0.869499 | -6.37209 |
| FERMT3    | 0.098512 | 3.597958 | 0.242594 | 0.808572 | 0.869499 | -6.74318 |
| LOXL1     | 0.095824 | 4.544985 | 0.242584 | 0.808579 | 0.869499 | -6.93622 |
| DDB1      | -0.03512 | 8.048782 | -0.24212 | 0.808938 | 0.869756 | -7.06895 |
| C5orf54   | 0.058158 | 1.920408 | 0.241926 | 0.809089 | 0.869851 | -6.40502 |
| SPRED2    | 0.044425 | 6.088551 | 0.241618 | 0.809327 | 0.870041 | -7.08355 |
| OVCA2     | 0.043777 | 4.301664 | 0.241405 | 0.809492 | 0.870084 | -6.90316 |
| SMU1      | 0.034387 | 5.626464 | 0.241482 | 0.809432 | 0.870084 | -7.05843 |
| RRN3      | 0.032672 | 5.837358 | 0.241167 | 0.809676 | 0.870215 | -7.07226 |
| TBC1D23   | -0.03664 | 5.801635 | -0.2407  | 0.810034 | 0.870533 | -7.07377 |
| SLAMF1    | -0.10868 | 0.035335 | -0.23999 | 0.81059  | 0.870857 | -6.11999 |
| MAGED4B   | -0.13951 | 2.895718 | -0.24009 | 0.810509 | 0.870857 | -6.63635 |
| LOC283070 | 0.108888 | 3.223253 | 0.239509 | 0.810959 | 0.870857 | -6.66235 |
| CD320     | -0.0638  | 4.364008 | -0.23952 | 0.810952 | 0.870857 | -6.92808 |
| CWC22     | 0.030132 | 5.128313 | 0.240078 | 0.810519 | 0.870857 | -7.01431 |
| GLRX5     | -0.03434 | 5.182293 | -0.23966 | 0.810846 | 0.870857 | -7.02567 |
| HSPA13    | -0.04681 | 5.186386 | -0.23966 | 0.810841 | 0.870857 | -7.02742 |
| WASH7P    | 0.040558 | 5.806486 | 0.239589 | 0.810897 | 0.870857 | -7.07031 |
| ATPIF1    | -0.04556 | 5.977637 | -0.23976 | 0.810769 | 0.870857 | -7.08268 |
| MINK1     | -0.04757 | 7.542443 | -0.23991 | 0.810652 | 0.870857 | -7.08274 |
| CCDC97    | 0.031707 | 5.504555 | 0.238614 | 0.811653 | 0.871535 | -7.0497  |
| KLHDC3    | 0.051037 | 6.213493 | 0.237948 | 0.812168 | 0.872021 | -7.08867 |
| SERF1A    | 0.045725 | 3.583813 | 0.237486 | 0.812526 | 0.872306 | -6.75586 |
| TXLNG     | -0.048   | 4.053878 | -0.23745 | 0.812558 | 0.872306 | -6.87294 |
| TRNAU1AP  | 0.038922 | 3.458736 | 0.237319 | 0.812655 | 0.872343 | -6.72545 |
| CCDC117   | -0.03645 | 5.383672 | -0.23679 | 0.813063 | 0.87258  | -7.04524 |
| IGF2R     | -0.04184 | 7.759624 | -0.23691 | 0.812969 | 0.87258  | -7.07831 |
| ETS1      | -0.07538 | 6.236415 | -0.23685 | 0.81302  | 0.87258  | -7.09268 |
| SPINK5    | -0.24353 | 4.515292 | -0.23659 | 0.813217 | 0.872678 | -6.97313 |
| LOC80054  | -0.10537 | 1.171577 | -0.23628 | 0.81346  | 0.872872 | -6.29852 |
| GCLC      | 0.080704 | 6.37259  | 0.235746 | 0.813874 | 0.873249 | -7.09285 |
| PLD6      | -0.06186 | 2.358845 | -0.23521 | 0.814289 | 0.873627 | -6.50437 |
| SRP19     | 0.033029 | 4.467333 | 0.2346   | 0.814763 | 0.874068 | -6.93316 |
| FAM178A   | -0.03715 | 5.196306 | -0.23416 | 0.8151   | 0.874314 | -7.0286  |
| PPP2CA    | 0.033003 | 7.234868 | 0.234143 | 0.815117 | 0.874314 | -7.09197 |
| EPS8      | -0.10691 | 6.041466 | -0.23367 | 0.815486 | 0.874643 | -7.08862 |
| SCNN1A    | -0.15653 | 6.574959 | -0.23345 | 0.815653 | 0.874754 | -7.09816 |
| MGC29506  | 0.186659 | 1.662277 | 0.232931 | 0.816056 | 0.875002 | -6.33691 |
| C2orf34   | 0.050289 | 2.34526  | 0.232939 | 0.81605  | 0.875002 | -6.48332 |
| ZNF772    | -0.09077 | 2.823758 | -0.23279 | 0.816166 | 0.875002 | -6.61023 |
| SNRNP25   | -0.04854 | 3.683443 | -0.23285 | 0.816119 | 0.875002 | -6.79443 |
| PVRL2     | 0.069194 | 7.230662 | 0.232749 | 0.816197 | 0.875002 | -7.09294 |
| KSR1      | 0.065938 | 5.160886 | 0.232574 | 0.816333 | 0.875081 | -7.01683 |
| SPTB      | 0.073952 | 3.017331 | 0.232215 | 0.816611 | 0.875178 | -6.621   |
| WDR5B     | -0.04874 | 3.397875 | -0.23225 | 0.816584 | 0.875178 | -6.72998 |
| JUNB      | -0.06518 | 8.062185 | -0.2323  | 0.816546 | 0.875178 | -7.07013 |
| NSF       | 0.039481 | 6.191283 | 0.232127 | 0.81668  | 0.875184 | -7.08962 |
| TWIST2    | -0.11677 | 0.847218 | -0.2308  | 0.817713 | 0.87609  | -6.25041 |
| ICOSLG    | 0.068789 | 3.976036 | 0.230867 | 0.817657 | 0.87609  | -6.83697 |
| TRPS1     | 0.113574 | 4.891989 | 0.230872 | 0.817653 | 0.87609  | -6.9827  |
| UBE2R2    | -0.0391  | 6.595276 | -0.23057 | 0.81789  | 0.876212 | -7.09871 |
| FBR3      | -0.03435 | 6.839861 | -0.23047 | 0.817967 | 0.876228 | -7.09793 |
| GCET2     | -0.08543 | 1.686097 | -0.23035 | 0.81806  | 0.87626  | -6.38684 |
| EXOC6     | 0.06146  | 4.132995 | 0.230043 | 0.818297 | 0.876379 | -6.87018 |
| PTPRG     | -0.07779 | 4.996814 | -0.23011 | 0.818244 | 0.876379 | -7.01255 |
| ARL2BP    | 0.042153 | 5.931439 | 0.229643 | 0.818607 | 0.876644 | -7.07954 |
| DNAJC30   | 0.042035 | 3.985612 | 0.229079 | 0.819045 | 0.876921 | -6.84488 |
| GEMIN4    | 0.043191 | 5.308666 | 0.229213 | 0.818941 | 0.876921 | -7.03367 |

|           |          |          |          |          |          |          |
|-----------|----------|----------|----------|----------|----------|----------|
| RNF13     | 0.037503 | 6.099816 | 0.229068 | 0.819054 | 0.876921 | -7.0872  |
| LOC728640 | -0.05639 | 0.661698 | -0.22874 | 0.819304 | 0.877091 | -6.21074 |
| IL10RA    | -0.09561 | 3.562196 | -0.2287  | 0.819338 | 0.877091 | -6.78164 |
| PLXDC2    | -0.09669 | 4.061075 | -0.22854 | 0.819462 | 0.877157 | -6.88963 |
| NDRG4     | -0.1635  | 3.586516 | -0.22843 | 0.819547 | 0.877181 | -6.80369 |
| FASN      | 0.051759 | 8.949544 | 0.2279   | 0.81996  | 0.877555 | -7.04385 |
| SEMA6D    | -0.12727 | 2.434056 | -0.22767 | 0.820139 | 0.87768  | -6.53623 |
| ZNF365    | -0.17268 | 0.941846 | -0.22753 | 0.820251 | 0.877732 | -6.27792 |
| QPRT      | 0.149757 | 1.789172 | 0.226907 | 0.820731 | 0.878178 | -6.36867 |
| MS4A7     | -0.09906 | 3.156099 | -0.22679 | 0.820825 | 0.878212 | -6.68818 |
| LOC344595 | 0.081312 | 1.606339 | 0.226424 | 0.821106 | 0.878445 | -6.35132 |
| ANXA5     | 0.042921 | 7.766896 | 0.226221 | 0.821263 | 0.878546 | -7.08249 |
| NTNG2     | -0.09426 | 0.232697 | -0.22578 | 0.821603 | 0.878842 | -6.15103 |
| TRIM25    | 0.045328 | 6.380413 | 0.225365 | 0.821928 | 0.879123 | -7.09612 |
| ASAP2     | -0.05139 | 6.535514 | -0.22511 | 0.822125 | 0.879266 | -7.0997  |
| PREB      | 0.035725 | 5.35814  | 0.224854 | 0.822325 | 0.879413 | -7.03971 |
| REG4      | 0.428426 | 1.332435 | 0.224672 | 0.822467 | 0.879497 | -6.24216 |
| HEPH      | 0.132324 | 4.646096 | 0.224495 | 0.822604 | 0.879576 | -6.94892 |
| HDDC2     | -0.04608 | 4.973584 | -0.22438 | 0.822693 | 0.879604 | -7.00852 |
| C9orf46   | 0.05239  | 3.328089 | 0.223947 | 0.82303  | 0.879897 | -6.69525 |
| STRN      | 0.046141 | 5.344826 | 0.223647 | 0.823263 | 0.88007  | -7.03813 |
| C10orf46  | -0.03179 | 6.328069 | -0.2235  | 0.82338  | 0.88007  | -7.09689 |
| MAML1     | 0.031451 | 6.476978 | 0.223572 | 0.823321 | 0.88007  | -7.09854 |
| ZNF443    | -0.067   | 1.227835 | -0.22294 | 0.82381  | 0.880357 | -6.30684 |
| C19orf52  | 0.029035 | 3.561022 | 0.222903 | 0.823841 | 0.880357 | -6.75507 |
| ZNF440    | 0.05102  | 4.305082 | 0.222826 | 0.823901 | 0.880357 | -6.90658 |
| PTK2B     | 0.057669 | 5.871821 | 0.222839 | 0.823891 | 0.880357 | -7.07706 |
| BCL9      | -0.04119 | 5.40794  | -0.22249 | 0.82416  | 0.880566 | -7.05105 |
| SLC33A1   | 0.039842 | 5.23202  | 0.222335 | 0.824283 | 0.88063  | -7.02783 |
| B4GALNT4  | 0.229016 | 1.2398   | 0.221734 | 0.82475  | 0.881062 | -6.26945 |
| GFOD2     | -0.04487 | 4.851071 | -0.22165 | 0.824814 | 0.881063 | -6.99581 |
| INO80C    | -0.0545  | 3.438825 | -0.2214  | 0.825013 | 0.881172 | -6.74361 |
| MAML2     | -0.06465 | 4.275291 | -0.22136 | 0.825043 | 0.881172 | -6.92011 |
| ARMC9     | 0.058432 | 3.152031 | 0.221049 | 0.825282 | 0.881294 | -6.65684 |
| LOC96610  | -0.15326 | 8.462654 | -0.22112 | 0.825224 | 0.881294 | -7.05623 |
| CD47      | -0.04899 | 6.900925 | -0.22085 | 0.825434 | 0.881388 | -7.09921 |
| ZDHHC23   | 0.081083 | 4.040043 | 0.220572 | 0.825653 | 0.881555 | -6.84853 |
| TMEM30B   | -0.07571 | 6.364915 | -0.22027 | 0.825891 | 0.881741 | -7.099   |
| C14orf138 | 0.036608 | 3.191596 | 0.21951  | 0.82648  | 0.882303 | -6.66885 |
| KLHL11    | 0.065224 | 3.291381 | 0.219291 | 0.82665  | 0.882398 | -6.68591 |
| THOC7     | 0.033871 | 4.968982 | 0.219203 | 0.826718 | 0.882398 | -7.0014  |
| PNP       | 0.055385 | 6.303534 | 0.219047 | 0.82684  | 0.882398 | -7.09545 |
| RAPH1     | -0.04578 | 6.319854 | -0.21908 | 0.826811 | 0.882398 | -7.09795 |
| C6orf62   | -0.0372  | 6.650874 | -0.21899 | 0.826885 | 0.882398 | -7.10142 |
| PRMT6     | 0.059399 | 4.02404  | 0.218891 | 0.826961 | 0.882412 | -6.85283 |
| CEP57     | -0.03417 | 5.279943 | -0.21845 | 0.827306 | 0.882712 | -7.03974 |
| MAST3     | 0.052013 | 4.682149 | 0.218205 | 0.827495 | 0.882779 | -6.96374 |
| LLGL2     | 0.101063 | 6.497566 | 0.218279 | 0.827437 | 0.882779 | -7.09892 |
| SLC25A28  | -0.04226 | 4.75776  | -0.21807 | 0.827596 | 0.88282  | -6.98458 |
| INVS      | -0.03857 | 4.040523 | -0.21786 | 0.827763 | 0.882931 | -6.87364 |
| ME1       | -0.08535 | 5.561486 | -0.21749 | 0.828048 | 0.883167 | -7.06716 |
| ZMYM3     | -0.04053 | 5.62732  | -0.2172  | 0.828278 | 0.883345 | -7.06884 |
| C18orf8   | -0.04438 | 4.569882 | -0.21704 | 0.828404 | 0.883412 | -6.96066 |
| IL10RB    | -0.04011 | 5.188044 | -0.2168  | 0.82859  | 0.883543 | -7.03174 |
| LRP5L     | -0.04817 | 2.288375 | -0.21603 | 0.82919  | 0.884115 | -6.49212 |
| GUCY1B3   | 0.08277  | 3.70581  | 0.215497 | 0.829602 | 0.884471 | -6.78161 |
| SLCO2B1   | 0.096583 | 4.76661  | 0.215435 | 0.82965  | 0.884471 | -6.97094 |
| KRT4      | -0.35624 | 2.558341 | -0.21533 | 0.829732 | 0.88449  | -6.61785 |

|           |          |          |          |          |          |          |
|-----------|----------|----------|----------|----------|----------|----------|
| RPLP1     | -0.04409 | 9.446453 | -0.21498 | 0.830005 | 0.884714 | -7.0263  |
| SEC13     | -0.03631 | 6.079337 | -0.21488 | 0.83008  | 0.884726 | -7.09196 |
| PTPN23    | -0.02901 | 6.875507 | -0.21469 | 0.830227 | 0.884816 | -7.10108 |
| ATP6V0E1  | 0.035346 | 6.911372 | 0.214453 | 0.830415 | 0.884948 | -7.10137 |
| FLJ39582  | 0.079495 | 0.662768 | 0.213948 | 0.830809 | 0.885107 | -6.19597 |
| ELOF1     | 0.035138 | 4.578122 | 0.213937 | 0.830817 | 0.885107 | -6.95301 |
| PEF1      | 0.03402  | 6.066802 | 0.213966 | 0.830794 | 0.885107 | -7.08936 |
| KIAA1267  | -0.02897 | 6.27468  | -0.21406 | 0.830721 | 0.885107 | -7.09774 |
| ARHGAP28  | 0.115822 | 2.048322 | 0.213783 | 0.830937 | 0.885149 | -6.42476 |
| CCDC115   | -0.03235 | 4.627165 | -0.21372 | 0.830984 | 0.885149 | -6.96791 |
| PORCN     | -0.06208 | 3.822801 | -0.21331 | 0.831303 | 0.885354 | -6.83593 |
| LOC401397 | -0.05648 | 4.453244 | -0.21339 | 0.831241 | 0.885354 | -6.94737 |
| CACNA1D   | -0.17219 | 1.206046 | -0.21286 | 0.831658 | 0.885615 | -6.32022 |
| DDIT4     | 0.081417 | 6.719181 | 0.212836 | 0.831675 | 0.885615 | -7.10264 |
| LYPD6B    | -0.13433 | 2.278239 | -0.21262 | 0.831846 | 0.885731 | -6.49939 |
| TDP2      | 0.042023 | 5.355354 | 0.212456 | 0.83197  | 0.885795 | -7.04188 |
| LOC253039 | 0.041605 | 4.393345 | 0.212133 | 0.832222 | 0.885996 | -6.92498 |
| ADRA2C    | -0.11902 | 1.093351 | -0.21191 | 0.832396 | 0.886113 | -6.29492 |
| PIN4      | -0.04583 | 3.017199 | -0.21174 | 0.832525 | 0.886142 | -6.64844 |
| RABGGTA   | -0.04617 | 5.020506 | -0.21171 | 0.83255  | 0.886142 | -7.01647 |
| SIGLEC1   | 0.120697 | 3.007747 | 0.211615 | 0.832626 | 0.886155 | -6.61314 |
| PARP15    | -0.11278 | 0.158629 | -0.2108  | 0.83326  | 0.886569 | -6.14387 |
| MRPS9     | 0.030484 | 4.580091 | 0.210928 | 0.833161 | 0.886569 | -6.95464 |
| NAA35     | -0.03028 | 4.528761 | -0.21079 | 0.833268 | 0.886569 | -6.955   |
| CUTA      | 0.039365 | 5.831912 | 0.210889 | 0.833192 | 0.886569 | -7.07834 |
| MGC16275  | -0.04732 | 0.333818 | -0.21029 | 0.833661 | 0.886758 | -6.16229 |
| MRPL32    | 0.031977 | 4.814677 | 0.210266 | 0.833677 | 0.886758 | -6.98495 |
| DGKQ      | -0.04931 | 4.865273 | -0.21039 | 0.83358  | 0.886758 | -6.99949 |
| UNC5B     | 0.074517 | 5.861273 | 0.210237 | 0.8337   | 0.886758 | -7.07861 |
| RPL7A     | -0.04576 | 8.198106 | -0.21008 | 0.83382  | 0.886819 | -7.07111 |
| HIVEP2    | -0.04079 | 6.370392 | -0.20999 | 0.833896 | 0.886831 | -7.10078 |
| SLC35B4   | 0.036129 | 4.404978 | 0.209873 | 0.833983 | 0.886857 | -6.92909 |
| SERINC3   | -0.03167 | 7.081039 | -0.20896 | 0.834691 | 0.887542 | -7.09927 |
| STRADB    | -0.04834 | 2.911316 | -0.20855 | 0.835013 | 0.887675 | -6.62541 |
| UIMC1     | -0.02804 | 4.166929 | -0.20854 | 0.835025 | 0.887675 | -6.8988  |
| ZFYVE27   | 0.044524 | 4.573757 | 0.208479 | 0.83507  | 0.887675 | -6.95144 |
| NEU1      | 0.064913 | 5.70195  | 0.208479 | 0.83507  | 0.887675 | -7.06912 |
| TMED2     | 0.024782 | 8.010525 | 0.207939 | 0.835491 | 0.888055 | -7.07935 |
| AGK       | -0.04061 | 4.708595 | -0.20755 | 0.835796 | 0.888244 | -6.98084 |
| DNAJB1    | 0.061431 | 7.938227 | 0.207629 | 0.835733 | 0.888244 | -7.08249 |
| GPS2      | 0.035405 | 5.766032 | 0.207004 | 0.83622  | 0.888627 | -7.07546 |
| RASSF5    | -0.06921 | 5.128396 | -0.20681 | 0.836372 | 0.888653 | -7.0313  |
| WAPAL     | -0.02845 | 6.272058 | -0.20689 | 0.83631  | 0.888653 | -7.09916 |
| PRRC1     | -0.02655 | 6.311161 | -0.20644 | 0.836661 | 0.888893 | -7.10011 |
| KCND1     | 0.068428 | 1.728419 | 0.206321 | 0.836753 | 0.888922 | -6.37779 |
| F5        | 0.21303  | 2.729859 | 0.206237 | 0.836819 | 0.888925 | -6.5302  |
| HLA-DOA   | 0.116435 | 2.878933 | 0.205857 | 0.837114 | 0.889172 | -6.59037 |
| BRWD3     | 0.048472 | 4.477899 | 0.205271 | 0.837572 | 0.88959  | -6.93838 |
| HHLA3     | 0.059603 | 2.241716 | 0.204931 | 0.837837 | 0.889714 | -6.46979 |
| GPR89A    | 0.032287 | 4.78423  | 0.204877 | 0.837879 | 0.889714 | -6.98186 |
| COG2      | -0.03214 | 5.131645 | -0.2049  | 0.837864 | 0.889714 | -7.02792 |
| FCHSD1    | 0.05699  | 3.650112 | 0.20449  | 0.838181 | 0.889802 | -6.77334 |
| TSTD1     | -0.06413 | 3.989833 | -0.20444 | 0.838217 | 0.889802 | -6.87055 |
| HSDL1     | -0.03246 | 4.074805 | -0.20461 | 0.838091 | 0.889802 | -6.88285 |
| CD151     | -0.04312 | 7.423144 | -0.20451 | 0.838164 | 0.889802 | -7.0933  |
| FAM86B1   | -0.07599 | 1.8856   | -0.20426 | 0.838361 | 0.889886 | -6.4282  |
| IRX2      | -0.17147 | 3.995662 | -0.20379 | 0.838731 | 0.890212 | -6.88421 |
| C21orf119 | 0.05228  | 1.364606 | 0.203301 | 0.839109 | 0.89051  | -6.31712 |

|           |          |          |          |          |          |          |
|-----------|----------|----------|----------|----------|----------|----------|
| MPG       | 0.037599 | 4.726239 | 0.203181 | 0.839203 | 0.89051  | -6.97444 |
| SMURF1    | 0.041956 | 6.728061 | 0.203181 | 0.839203 | 0.89051  | -7.10473 |
| SLA       | -0.08207 | 3.118938 | -0.20301 | 0.839337 | 0.890585 | -6.68208 |
| RPL26     | -0.049   | 7.922741 | -0.20259 | 0.839666 | 0.890866 | -7.08116 |
| TTYH2     | -0.0753  | 2.784355 | -0.20233 | 0.839871 | 0.890948 | -6.6065  |
| PPM1H     | -0.12404 | 3.940868 | -0.20238 | 0.839824 | 0.890948 | -6.8651  |
| GATSL1    | 0.082349 | 0.538487 | 0.201924 | 0.840184 | 0.891213 | -6.17755 |
| SLC10A6   | -0.14786 | 0.278817 | -0.20184 | 0.840251 | 0.891216 | -6.17172 |
| RNF169    | 0.040224 | 5.672437 | 0.201429 | 0.840571 | 0.89142  | -7.0703  |
| SLC11A2   | 0.042817 | 6.069435 | 0.201441 | 0.840561 | 0.89142  | -7.09173 |
| GPR34     | 0.072884 | 1.709518 | 0.201185 | 0.840761 | 0.891512 | -6.37397 |
| MYO5A     | 0.084536 | 5.646828 | 0.201154 | 0.840785 | 0.891512 | -7.06575 |
| C14orf153 | -0.03133 | 3.904987 | -0.20094 | 0.840953 | 0.891622 | -6.84821 |
| SETX      | -0.03376 | 7.048025 | -0.20072 | 0.841126 | 0.891738 | -7.10147 |
| AASDH     | -0.03451 | 3.580047 | -0.20057 | 0.841245 | 0.891796 | -6.7764  |
| PTPN3     | -0.04732 | 5.723637 | -0.20005 | 0.841646 | 0.892153 | -7.07858 |
| KLHL13    | -0.11938 | 2.839613 | -0.19862 | 0.842767 | 0.893069 | -6.6303  |
| EIF4E     | -0.03124 | 4.134713 | -0.19881 | 0.842613 | 0.893069 | -6.89514 |
| SERPINB8  | 0.059614 | 4.653093 | 0.198537 | 0.842829 | 0.893069 | -6.96477 |
| PRPSAP1   | -0.02998 | 5.271217 | -0.19855 | 0.84282  | 0.893069 | -7.04298 |
| SSR2      | 0.032345 | 7.36761  | 0.1987   | 0.842702 | 0.893069 | -7.09702 |
| RAB40C    | -0.03887 | 5.494487 | -0.19801 | 0.84324  | 0.893436 | -7.06277 |
| IMPA1     | -0.03867 | 4.846303 | -0.19776 | 0.843439 | 0.893482 | -6.99888 |
| HDAC6     | -0.03378 | 5.411409 | -0.19772 | 0.843471 | 0.893482 | -7.05572 |
| MYST3     | 0.03855  | 6.923475 | 0.197711 | 0.843475 | 0.893482 | -7.10471 |
| PDS5A     | 0.026647 | 7.505536 | 0.197587 | 0.843571 | 0.893517 | -7.09427 |
| FGR       | -0.07573 | 2.49567  | -0.19684 | 0.844156 | 0.894059 | -6.54529 |
| PRKRIP1   | 0.034864 | 4.172464 | 0.196608 | 0.844336 | 0.894059 | -6.89066 |
| SDCBP2    | -0.11482 | 4.983477 | -0.19672 | 0.844246 | 0.894059 | -7.02054 |
| MOBK13    | -0.02501 | 5.78829  | -0.1966  | 0.844339 | 0.894059 | -7.08216 |
| ARAP3     | 0.054615 | 4.688659 | 0.196224 | 0.844636 | 0.89417  | -6.96961 |
| FAM89B    | 0.040422 | 5.558029 | 0.196229 | 0.844633 | 0.89417  | -7.06293 |
| SH3BP2    | -0.04314 | 5.983849 | -0.19624 | 0.844623 | 0.89417  | -7.09233 |
| PPP1R1B   | 0.307824 | 2.819856 | 0.19529  | 0.845366 | 0.894873 | -6.53295 |
| RNF170    | -0.03852 | 4.490241 | -0.19513 | 0.845492 | 0.894873 | -6.95361 |
| PNKD      | -0.06834 | 5.921874 | -0.19517 | 0.845464 | 0.894873 | -7.09074 |
| CEMP1     | -0.0371  | 1.921922 | -0.19481 | 0.845742 | 0.894954 | -6.42942 |
| LOC728855 | -0.05293 | 2.580911 | -0.19483 | 0.845729 | 0.894954 | -6.55659 |
| DCTN5     | 0.025522 | 6.076444 | 0.194786 | 0.845761 | 0.894954 | -7.09397 |
| DDHD1     | -0.04639 | 4.758292 | -0.19309 | 0.847084 | 0.896286 | -6.9904  |
| ZNF530    | -0.07447 | 1.28869  | -0.19265 | 0.847434 | 0.89652  | -6.3256  |
| BSCL2     | 0.047269 | 5.39388  | 0.192713 | 0.847382 | 0.89652  | -7.04865 |
| DGCR14    | 0.029296 | 4.123283 | 0.191799 | 0.848096 | 0.897154 | -6.88391 |
| PLOD2     | -0.07178 | 6.088949 | -0.19109 | 0.84865  | 0.897671 | -7.0983  |
| ATP2B1    | 0.045392 | 6.518584 | 0.190204 | 0.849344 | 0.898338 | -7.10585 |
| ANAPC5    | 0.023666 | 6.596725 | 0.190112 | 0.849417 | 0.898346 | -7.1069  |
| DMXL2     | 0.053448 | 5.24774  | 0.189977 | 0.849522 | 0.89839  | -7.03449 |
| RARRES3   | 0.109608 | 4.025955 | 0.188966 | 0.850313 | 0.8991   | -6.84824 |
| EGFR      | 0.093287 | 7.320811 | 0.188954 | 0.850323 | 0.8991   | -7.10091 |
| GPAA1     | 0.033054 | 6.812985 | 0.188745 | 0.850486 | 0.899205 | -7.10729 |
| FGD2      | 0.071227 | 2.178463 | 0.188654 | 0.850557 | 0.899212 | -6.45965 |
| TRPC4AP   | -0.02526 | 6.749728 | -0.18857 | 0.850627 | 0.899218 | -7.10741 |
| SAP30BP   | 0.025807 | 5.416701 | 0.18847  | 0.850702 | 0.899229 | -7.0535  |
| DISC1     | 0.064208 | 2.686788 | 0.188138 | 0.850961 | 0.899271 | -6.56236 |
| MINA      | 0.029904 | 5.459633 | 0.18809  | 0.850999 | 0.899271 | -7.05704 |
| IDH3B     | 0.033932 | 5.885631 | 0.188319 | 0.85082  | 0.899271 | -7.08606 |
| CCDC109A  | -0.06031 | 6.114287 | -0.18811 | 0.850985 | 0.899271 | -7.09922 |
| C2orf28   | 0.026667 | 6.436252 | 0.187666 | 0.851331 | 0.899554 | -7.10528 |



|              |          |          |          |          |          |          |
|--------------|----------|----------|----------|----------|----------|----------|
| PDE4B        | 0.075242 | 3.709881 | 0.187365 | 0.851567 | 0.899735 | -6.78991 |
| LOC100129387 | -0.03776 | 2.66181  | -0.18676 | 0.852044 | 0.900073 | -6.5741  |
| MOSPD2       | 0.036884 | 4.10481  | 0.186761 | 0.85204  | 0.900073 | -6.87944 |
| ATP6V1A      | 0.033402 | 6.749318 | 0.186709 | 0.85208  | 0.900073 | -7.10794 |
| CD163L1      | -0.08939 | 1.183235 | -0.18625 | 0.852438 | 0.900315 | -6.3107  |
| PLEKHA2      | -0.03761 | 5.554651 | -0.18633 | 0.852374 | 0.900315 | -7.06958 |
| TNFRSF19     | -0.10005 | 3.399094 | -0.18573 | 0.852844 | 0.900467 | -6.75299 |
| ZNF765       | -0.03867 | 3.634744 | -0.18569 | 0.852881 | 0.900467 | -6.79161 |
| MRPL23       | 0.0416   | 4.889538 | 0.185863 | 0.852743 | 0.900467 | -6.99743 |
| MAF          | -0.08778 | 5.5813   | -0.18566 | 0.852904 | 0.900467 | -7.07504 |
| REXO1        | 0.022186 | 6.076896 | 0.185796 | 0.852795 | 0.900467 | -7.09579 |
| SLC41A3      | -0.03349 | 5.139328 | -0.18548 | 0.853045 | 0.900548 | -7.03276 |
| PPIL4        | 0.027084 | 5.00094  | 0.184998 | 0.853421 | 0.900768 | -7.0123  |
| FTSJD1       | 0.030783 | 5.162303 | 0.184975 | 0.853438 | 0.900768 | -7.02941 |
| SPAG9        | -0.03206 | 7.023286 | -0.18496 | 0.853447 | 0.900768 | -7.10493 |
| C7orf59      | 0.038928 | 5.275837 | 0.184742 | 0.853621 | 0.900883 | -7.03991 |
| ZBTB26       | -0.03507 | 2.535222 | -0.1839  | 0.854277 | 0.901371 | -6.54654 |
| H2AFY2       | -0.1124  | 3.363155 | -0.18402 | 0.854183 | 0.901371 | -6.75347 |
| WARS2        | -0.03005 | 4.075562 | -0.18397 | 0.854229 | 0.901371 | -6.88487 |
| UCHL1        | 0.186539 | 3.021331 | 0.183724 | 0.854418 | 0.901384 | -6.61695 |
| TMEM97       | 0.062276 | 5.560484 | 0.183805 | 0.854355 | 0.901384 | -7.06297 |
| RAGE         | 0.061311 | 2.996136 | 0.183611 | 0.854507 | 0.90141  | -6.62538 |
| HRSP12       | 0.042008 | 3.799962 | 0.183222 | 0.854812 | 0.9016   | -6.81193 |
| BMF          | -0.05881 | 4.172235 | -0.18322 | 0.854816 | 0.9016   | -6.90793 |
| NIPBL        | 0.031376 | 7.080097 | 0.182631 | 0.855275 | 0.902016 | -7.10534 |
| RALBP1       | 0.034176 | 6.931036 | 0.182253 | 0.855571 | 0.90226  | -7.10751 |
| DOT1L        | -0.03108 | 6.668633 | -0.1821  | 0.855694 | 0.902321 | -7.10882 |
| OSBP2        | 0.079637 | 3.406268 | 0.181562 | 0.856113 | 0.902664 | -6.71689 |
| TCF12        | -0.03347 | 6.802059 | -0.18152 | 0.856148 | 0.902664 | -7.10834 |
| PLA2G4C      | 0.082163 | 1.575438 | 0.181432 | 0.856214 | 0.902666 | -6.35481 |
| SFT2D2       | -0.0363  | 3.310016 | -0.18064 | 0.856837 | 0.903253 | -6.71848 |
| LOC150776    | 0.033543 | 4.471631 | 0.180532 | 0.85692  | 0.903274 | -6.94471 |
| LOC221442    | -0.07489 | 0.945147 | -0.18032 | 0.857085 | 0.90331  | -6.26661 |
| NCRNA00188   | 0.043032 | 7.065591 | 0.180368 | 0.857049 | 0.90331  | -7.10615 |
| HDDC3        | 0.044004 | 2.996598 | 0.180126 | 0.857238 | 0.903404 | -6.62753 |
| C14orf21     | -0.02974 | 3.768336 | -0.17961 | 0.85764  | 0.90376  | -6.82281 |
| CX3CL1       | -0.09078 | 4.946422 | -0.17933 | 0.857862 | 0.903925 | -7.02017 |
| G6PC3        | 0.045524 | 5.612324 | 0.178927 | 0.858179 | 0.904191 | -7.0698  |
| SHROOM2      | -0.08976 | 4.11915  | -0.17881 | 0.858268 | 0.904216 | -6.90557 |
| FBXO32       | -0.06894 | 4.784689 | -0.17842 | 0.85858  | 0.904477 | -7.00019 |
| CPZ          | -0.07831 | 2.618605 | -0.17815 | 0.858791 | 0.904631 | -6.57489 |
| FRK          | 0.07097  | 3.358396 | 0.177976 | 0.858924 | 0.904703 | -6.70158 |
| MBD6         | 0.024904 | 6.69184  | 0.177778 | 0.85908  | 0.904799 | -7.10954 |
| FAM70B       | 0.062703 | 1.092769 | 0.176967 | 0.859716 | 0.905285 | -6.27295 |
| TOM1         | 0.038096 | 5.423209 | 0.176942 | 0.859735 | 0.905285 | -7.05543 |
| MAF1         | -0.03159 | 6.516836 | -0.17698 | 0.859707 | 0.905285 | -7.10903 |
| C11orf30     | -0.02989 | 4.704371 | -0.17646 | 0.860117 | 0.905613 | -6.98483 |
| RAB5C        | 0.023693 | 7.166929 | 0.17638  | 0.860176 | 0.905613 | -7.10489 |
| VAPB         | -0.02453 | 6.096763 | -0.17561 | 0.86078  | 0.90618  | -7.09988 |
| C15orf62     | -0.06259 | 1.91626  | -0.17531 | 0.861014 | 0.906358 | -6.43759 |
| NAMPT        | 0.060532 | 7.618864 | 0.174904 | 0.861334 | 0.906627 | -7.09666 |
| MUC13        | 0.331133 | 3.610607 | 0.174143 | 0.861931 | 0.907063 | -6.69618 |
| TSPAN6       | 0.045138 | 5.282367 | 0.174281 | 0.861823 | 0.907063 | -7.04226 |
| BRD8         | -0.02594 | 5.262398 | -0.17404 | 0.862009 | 0.907063 | -7.04637 |
| KIAA0174     | -0.01862 | 6.243493 | -0.17409 | 0.861974 | 0.907063 | -7.10444 |
| GAN          | -0.05343 | 3.450113 | -0.17381 | 0.862196 | 0.907142 | -6.75726 |
| BAT2L1       | 0.030931 | 8.478182 | 0.173765 | 0.862228 | 0.907142 | -7.07087 |
| TSPO         | 0.043622 | 6.462573 | 0.173701 | 0.862279 | 0.907142 | -7.108   |

|           |          |          |          |          |          |          |
|-----------|----------|----------|----------|----------|----------|----------|
| SNAP23    | -0.02284 | 5.640402 | -0.17352 | 0.862418 | 0.907221 | -7.07698 |
| TNFRSF1B  | 0.067977 | 5.047694 | 0.173213 | 0.862662 | 0.907409 | -7.01559 |
| SSFA2     | -0.04188 | 7.912634 | -0.17294 | 0.862879 | 0.907569 | -7.08712 |
| C2orf49   | 0.023779 | 3.114853 | 0.172751 | 0.863024 | 0.907653 | -6.66191 |
| BAI2      | -0.09456 | 2.090558 | -0.17227 | 0.863398 | 0.907978 | -6.47423 |
| THUMPD3   | -0.0256  | 5.191959 | -0.17193 | 0.863671 | 0.908196 | -7.03986 |
| ZNF133    | -0.02973 | 3.903975 | -0.17178 | 0.863787 | 0.90825  | -6.85258 |
| ZDHHC4    | 0.0388   | 4.967153 | 0.17158  | 0.863943 | 0.908346 | -7.00958 |
| LNP1      | 0.053079 | 1.145164 | 0.171302 | 0.864162 | 0.908508 | -6.2866  |
| KTN1      | 0.035465 | 8.114414 | 0.171144 | 0.864286 | 0.90857  | -7.08352 |
| PLCH1     | -0.12504 | 2.122851 | -0.17065 | 0.864671 | 0.908906 | -6.4774  |
| ZYX       | 0.039272 | 7.96629  | 0.170189 | 0.865036 | 0.909221 | -7.08821 |
| FBXO11    | -0.02032 | 6.255788 | -0.17008 | 0.865123 | 0.909245 | -7.10549 |
| TSG101    | 0.023883 | 5.848836 | 0.169377 | 0.865674 | 0.909755 | -7.08796 |
| DND1      | 0.034115 | 2.212674 | 0.169203 | 0.86581  | 0.90983  | -6.47376 |
| ZNF746    | 0.031987 | 4.821085 | 0.168941 | 0.866016 | 0.909978 | -6.99354 |
| METTL6    | 0.023437 | 2.892893 | 0.168351 | 0.86648  | 0.910397 | -6.61447 |
| MYLK4     | -0.05758 | 0.260794 | -0.16799 | 0.866764 | 0.910626 | -6.16049 |
| GNPNAT1   | 0.035719 | 6.008913 | 0.167907 | 0.866828 | 0.910626 | -7.0955  |
| MTMR14    | 0.030527 | 4.994129 | 0.167287 | 0.867316 | 0.911069 | -7.01408 |
| LDLRAP1   | 0.033551 | 5.181636 | 0.167028 | 0.867519 | 0.911215 | -7.03425 |
| OGG1      | -0.02969 | 3.424233 | -0.16693 | 0.867594 | 0.911225 | -6.74535 |
| MIR17HG   | -0.05912 | 1.578145 | -0.16604 | 0.868294 | 0.911892 | -6.37697 |
| CCND3     | -0.04011 | 5.965452 | -0.16591 | 0.868398 | 0.911932 | -7.09695 |
| TAGAP     | -0.0731  | 2.02096  | -0.16576 | 0.868516 | 0.911988 | -6.4596  |
| MAN2B1    | -0.02927 | 6.770122 | -0.16564 | 0.868606 | 0.912014 | -7.11131 |
| ELP3      | -0.02799 | 4.418611 | -0.16551 | 0.868711 | 0.912055 | -6.94789 |
| RIT1      | -0.04064 | 4.849943 | -0.16519 | 0.868962 | 0.91225  | -7.00575 |
| RPL32     | 0.037367 | 8.297524 | 0.16492  | 0.869176 | 0.912406 | -7.07873 |
| NR1H3     | 0.049504 | 3.365539 | 0.163796 | 0.870059 | 0.913265 | -6.71442 |
| AP4S1     | 0.04204  | 1.884495 | 0.163387 | 0.870381 | 0.913503 | -6.41776 |
| SMARCD2   | 0.02756  | 6.776138 | 0.163341 | 0.870417 | 0.913503 | -7.11194 |
| EPHB3     | -0.08082 | 5.885079 | -0.16324 | 0.870498 | 0.913519 | -7.0953  |
| SMURF2    | -0.02814 | 4.836372 | -0.16314 | 0.870578 | 0.913535 | -7.00267 |
| IER3IP1   | -0.03214 | 5.470482 | -0.16299 | 0.870689 | 0.913583 | -7.06684 |
| MRPL40    | -0.03187 | 4.373175 | -0.16284 | 0.870815 | 0.913646 | -6.94152 |
| HEY2      | -0.05435 | 1.485201 | -0.16247 | 0.871103 | 0.91374  | -6.36146 |
| FAM26E    | 0.06861  | 1.701103 | 0.162357 | 0.871191 | 0.91374  | -6.38079 |
| TICAM1    | -0.03713 | 5.769936 | -0.16231 | 0.871231 | 0.91374  | -7.08779 |
| RNMT      | 0.026798 | 5.901882 | 0.162338 | 0.871206 | 0.91374  | -7.0918  |
| PLD3      | -0.0324  | 7.325965 | -0.16256 | 0.871031 | 0.91374  | -7.10325 |
| BCAS3     | -0.03159 | 4.870781 | -0.1621  | 0.871394 | 0.913842 | -7.00779 |
| ZFP37     | -0.06577 | 1.098296 | -0.1614  | 0.871942 | 0.913868 | -6.29774 |
| FBXO48    | 0.030284 | 1.384445 | 0.16184  | 0.871598 | 0.913868 | -6.3297  |
| SMPD2     | -0.04031 | 3.516296 | -0.16166 | 0.871736 | 0.913868 | -6.76822 |
| MRPS23    | 0.02601  | 4.603865 | 0.161449 | 0.871905 | 0.913868 | -6.96728 |
| ZNF507    | 0.029704 | 5.295498 | 0.161491 | 0.871872 | 0.913868 | -7.04687 |
| POLD4     | 0.043671 | 5.577949 | 0.161838 | 0.871599 | 0.913868 | -7.06986 |
| BAT3      | 0.021542 | 8.07178  | 0.161702 | 0.871706 | 0.913868 | -7.08599 |
| DNAJC13   | 0.027314 | 6.542828 | 0.161473 | 0.871886 | 0.913868 | -7.11136 |
| KIAA1324L | -0.09803 | 3.108345 | -0.16117 | 0.872126 | 0.913992 | -6.69546 |
| SLC27A5   | 0.059645 | 1.848457 | 0.160874 | 0.872357 | 0.914028 | -6.40791 |
| SMPDL3B   | -0.12859 | 2.378318 | -0.16093 | 0.872312 | 0.914028 | -6.52587 |
| ZBTB25    | -0.03042 | 3.005451 | -0.16094 | 0.872309 | 0.914028 | -6.65144 |
| NUDT11    | -0.1268  | 0.477928 | -0.16076 | 0.872446 | 0.914053 | -6.20845 |
| ZNF543    | -0.0307  | 3.178721 | -0.16033 | 0.872786 | 0.914273 | -6.69277 |
| PHIP      | 0.024512 | 7.023033 | 0.160333 | 0.872783 | 0.914273 | -7.10996 |
| GPR89C    | -0.05006 | 2.746362 | -0.15992 | 0.873109 | 0.91449  | -6.59824 |

|            |          |          |          |          |          |          |
|------------|----------|----------|----------|----------|----------|----------|
| FAM127A    | -0.05431 | 5.775362 | -0.1599  | 0.873125 | 0.91449  | -7.0896  |
| CCL28      | -0.10511 | 2.173844 | -0.15933 | 0.873569 | 0.914867 | -6.48826 |
| LAMP2      | 0.028073 | 7.992654 | 0.159274 | 0.873616 | 0.914867 | -7.08891 |
| RASA1      | -0.02665 | 5.395656 | -0.15862 | 0.874132 | 0.91534  | -7.06083 |
| MSLN       | 0.192512 | 2.482077 | 0.15808  | 0.874555 | 0.915714 | -6.49311 |
| UBL7       | -0.02424 | 5.191257 | -0.15718 | 0.875262 | 0.916385 | -7.04192 |
| LOC728613  | -0.06334 | 2.771932 | -0.15688 | 0.875497 | 0.9165   | -6.60615 |
| RHOT2      | -0.02221 | 5.663032 | -0.15681 | 0.875554 | 0.9165   | -7.08127 |
| CYFIP1     | 0.024665 | 7.496666 | 0.156793 | 0.875569 | 0.9165   | -7.10163 |
| DAZAP2     | -0.02172 | 7.850677 | -0.15667 | 0.875663 | 0.91653  | -7.09209 |
| VWA1       | -0.04487 | 6.70239  | -0.15632 | 0.875937 | 0.916749 | -7.11311 |
| UPF2       | 0.024402 | 6.042246 | 0.156031 | 0.876168 | 0.916921 | -7.09939 |
| P2RX7      | 0.07205  | 0.999635 | 0.155907 | 0.876266 | 0.916955 | -6.26392 |
| PODXL2     | -0.08878 | 4.298934 | -0.15582 | 0.876338 | 0.916962 | -6.93824 |
| YY1AP1     | -0.01767 | 6.56906  | -0.15546 | 0.876619 | 0.917188 | -7.11296 |
| AGER       | -0.04902 | 0.883767 | -0.15512 | 0.876883 | 0.917258 | -6.25901 |
| MAP3K2     | 0.029913 | 5.556212 | 0.155126 | 0.876881 | 0.917258 | -7.07045 |
| NDUFAB1    | -0.02684 | 5.621238 | -0.15524 | 0.876794 | 0.917258 | -7.07893 |
| MFS1       | -0.02856 | 5.97554  | -0.15503 | 0.876959 | 0.917269 | -7.09875 |
| TRIL       | -0.06922 | 2.599904 | -0.15476 | 0.877167 | 0.917309 | -6.57195 |
| CHKB-CPT1B | -0.03229 | 4.429987 | -0.15475 | 0.877174 | 0.917309 | -6.95097 |
| GRB10      | 0.044196 | 5.710163 | 0.154727 | 0.877195 | 0.917309 | -7.08065 |
| C20orf30   | 0.024541 | 6.286869 | 0.154239 | 0.877579 | 0.917642 | -7.1078  |
| ISLR       | 0.087312 | 4.991671 | 0.153818 | 0.87791  | 0.91792  | -7.01133 |
| SLC29A3    | -0.04438 | 3.31564  | -0.15323 | 0.878373 | 0.918266 | -6.72484 |
| TMEM188    | -0.02292 | 3.409851 | -0.15329 | 0.878323 | 0.918266 | -6.74385 |
| EME2       | 0.039012 | 0.99092  | 0.152996 | 0.878558 | 0.918391 | -6.26364 |
| SELS       | -0.02836 | 5.281789 | -0.15264 | 0.878837 | 0.918614 | -7.05141 |
| UCKL1AS    | -0.04398 | 1.193549 | -0.15248 | 0.878965 | 0.918678 | -6.31012 |
| SCYL1      | -0.01998 | 6.510249 | -0.1523  | 0.879104 | 0.918756 | -7.11291 |
| ZG16B      | -0.1631  | 1.116857 | -0.15185 | 0.879458 | 0.919056 | -6.30741 |
| WDR81      | 0.027475 | 5.803283 | 0.151697 | 0.879581 | 0.919116 | -7.08814 |
| P4HA2      | 0.039882 | 5.560347 | 0.151484 | 0.879749 | 0.919223 | -7.07058 |
| CHMP4A     | -0.02422 | 4.907478 | -0.15102 | 0.880117 | 0.919539 | -7.01269 |
| YARS       | 0.024351 | 6.538153 | 0.150905 | 0.880205 | 0.919562 | -7.11298 |
| C1orf103   | 0.0391   | 4.300083 | 0.150488 | 0.880533 | 0.919836 | -6.92117 |
| KAZ        | 0.047624 | 4.332995 | 0.149694 | 0.881159 | 0.920419 | -6.92828 |
| KLHL5      | 0.04282  | 5.346785 | 0.149613 | 0.881223 | 0.920419 | -7.05295 |
| DKAKD      | 0.033575 | 4.659243 | 0.149449 | 0.881352 | 0.920485 | -6.97635 |
| ZNF600     | 0.049416 | 3.50959  | 0.148784 | 0.881876 | 0.920964 | -6.75065 |
| SCRN1      | 0.042113 | 6.736935 | 0.148553 | 0.882058 | 0.921085 | -7.11434 |
| AGT        | 0.133052 | 2.412684 | 0.14803  | 0.88247  | 0.92124  | -6.49837 |
| WIPF1      | -0.05192 | 5.410706 | -0.14825 | 0.882295 | 0.92124  | -7.06614 |
| PRDX4      | 0.031978 | 5.837066 | 0.148184 | 0.882349 | 0.92124  | -7.09015 |
| HMGCR      | -0.0371  | 6.235398 | -0.14809 | 0.882423 | 0.92124  | -7.10883 |
| LGALS3     | -0.05158 | 7.738162 | -0.14771 | 0.882726 | 0.921438 | -7.09574 |
| RPL22      | 0.027065 | 7.810478 | 0.147349 | 0.883007 | 0.921662 | -7.09576 |
| HSPC157    | -0.03361 | 1.791833 | -0.14713 | 0.883183 | 0.921708 | -6.41388 |
| HIRIP3     | -0.02688 | 3.83988  | -0.14713 | 0.88318  | 0.921708 | -6.84324 |
| YIPF3      | -0.03033 | 6.800179 | -0.14683 | 0.883417 | 0.921884 | -7.11405 |
| MAP3K13    | 0.059155 | 2.551058 | 0.146048 | 0.884032 | 0.922457 | -6.53497 |
| SLC6A15    | 0.182938 | 0.450558 | 0.145776 | 0.884247 | 0.922612 | -6.16483 |
| AARSD1     | -0.02301 | 3.775409 | -0.14496 | 0.884892 | 0.923177 | -6.82834 |
| BRD7       | 0.021944 | 5.531106 | 0.144921 | 0.884921 | 0.923177 | -7.07074 |
| CCDC130    | -0.02235 | 4.365141 | -0.14452 | 0.88524  | 0.923441 | -6.94187 |
| MPP6       | -0.07331 | 2.293854 | -0.1441  | 0.88557  | 0.923717 | -6.51389 |
| PCDHB11    | -0.07585 | 1.423805 | -0.14339 | 0.886132 | 0.924234 | -6.35965 |
| LRR20      | -0.04149 | 3.757045 | -0.14277 | 0.886616 | 0.924669 | -6.82761 |

|           |          |          |          |          |          |          |
|-----------|----------|----------|----------|----------|----------|----------|
| KLRD1     | -0.0749  | 0.210091 | -0.14231 | 0.88698  | 0.92498  | -6.15876 |
| INTS10    | -0.02297 | 5.500646 | -0.14221 | 0.887059 | 0.924994 | -7.07171 |
| TMED10    | -0.01892 | 8.436101 | -0.14186 | 0.887334 | 0.925212 | -7.07579 |
| MIS12     | -0.02008 | 4.270099 | -0.1417  | 0.887463 | 0.925277 | -6.92716 |
| TMEM144   | -0.05572 | 3.342202 | -0.14125 | 0.88782  | 0.92558  | -6.73191 |
| PAK1      | 0.031005 | 6.415197 | 0.140955 | 0.888049 | 0.92575  | -7.11249 |
| MGAT4B    | 0.037699 | 7.292673 | 0.140813 | 0.888161 | 0.925797 | -7.1084  |
| PHACTR4   | -0.02391 | 6.559844 | -0.14043 | 0.88846  | 0.92604  | -7.11515 |
| ADAM15    | -0.02846 | 7.43066  | -0.13992 | 0.888863 | 0.926381 | -7.10454 |
| BTG1      | -0.03281 | 7.051296 | -0.13985 | 0.88892  | 0.926381 | -7.11178 |
| GCHFR     | -0.04648 | 2.743798 | -0.13958 | 0.889135 | 0.926536 | -6.59944 |
| SMCHD1    | 0.027113 | 6.582594 | 0.13894  | 0.889639 | 0.926992 | -7.11515 |
| DDRKG1    | -0.02545 | 4.722967 | -0.13884 | 0.889721 | 0.927008 | -6.99207 |
| PEX11B    | -0.02178 | 4.417363 | -0.13875 | 0.889792 | 0.927013 | -6.95047 |
| KLHDC4    | -0.02347 | 3.703517 | -0.13851 | 0.889975 | 0.927134 | -6.8121  |
| MLF1      | -0.10361 | 3.067251 | -0.1384  | 0.890068 | 0.927162 | -6.69163 |
| FKBP15    | 0.020672 | 5.741417 | 0.138303 | 0.890142 | 0.92717  | -7.08656 |
| DLG1      | -0.02772 | 6.856616 | -0.13793 | 0.890439 | 0.927411 | -7.11483 |
| AARS      | 0.025168 | 7.10164  | 0.137834 | 0.890512 | 0.927418 | -7.11207 |
| PARD6B    | 0.058295 | 4.084284 | 0.137642 | 0.890664 | 0.927507 | -6.87573 |
| TUFM      | 0.024023 | 7.113169 | 0.137553 | 0.890734 | 0.92751  | -7.1119  |
| PRDX3     | -0.02165 | 6.938761 | -0.13681 | 0.891317 | 0.928048 | -7.11404 |
| IGF2      | 0.073606 | 5.396471 | 0.136707 | 0.891402 | 0.928067 | -7.05629 |
| PTPRA     | -0.01892 | 6.396543 | -0.13651 | 0.891557 | 0.92816  | -7.1136  |
| EPS8L1    | -0.08044 | 4.963706 | -0.13621 | 0.891798 | 0.928341 | -7.02527 |
| ZNF799    | -0.03737 | 1.485321 | -0.13589 | 0.892051 | 0.928466 | -6.36226 |
| BOD1      | 0.022771 | 4.822899 | 0.135934 | 0.892012 | 0.928466 | -6.99992 |
| PCDHGA10  | -0.08221 | 2.511143 | -0.13463 | 0.89304  | 0.929427 | -6.55888 |
| ZNF239    | -0.06971 | 1.735689 | -0.13442 | 0.893208 | 0.929532 | -6.41156 |
| C6orf132  | -0.05696 | 4.432904 | -0.13417 | 0.893405 | 0.929668 | -6.956   |
| FLJ90757  | 0.031739 | 3.789867 | 0.133897 | 0.89362  | 0.929776 | -6.82139 |
| KCTD9     | -0.02522 | 5.213827 | -0.13387 | 0.893642 | 0.929776 | -7.04785 |
| LOC728758 | 0.027028 | 2.029837 | 0.133699 | 0.893777 | 0.929783 | -6.44906 |
| GON4L     | -0.0149  | 6.039272 | -0.13369 | 0.893781 | 0.929783 | -7.10394 |
| MVK       | -0.03287 | 4.021112 | -0.13338 | 0.894025 | 0.929967 | -6.88473 |
| STXBP3    | 0.018729 | 5.516609 | 0.132382 | 0.894817 | 0.930664 | -7.07144 |
| LAMB1     | 0.038177 | 7.517113 | 0.132368 | 0.894828 | 0.930664 | -7.10497 |
| SAP18     | -0.02188 | 6.617418 | -0.1322  | 0.894965 | 0.930736 | -7.11654 |
| PLEKHG4B  | 0.125671 | 1.146595 | 0.131756 | 0.895311 | 0.931028 | -6.27912 |
| KLHL23    | 0.055086 | 3.161002 | 0.131594 | 0.895439 | 0.931092 | -6.67565 |
| TFIP11    | -0.018   | 5.262555 | -0.13131 | 0.895664 | 0.931256 | -7.05217 |
| ZNF202    | 0.020069 | 3.646458 | 0.130546 | 0.896268 | 0.931691 | -6.79179 |
| C1orf63   | 0.030776 | 4.528639 | 0.130488 | 0.896313 | 0.931691 | -6.96035 |
| COL16A1   | 0.054258 | 5.433922 | 0.130538 | 0.896274 | 0.931691 | -7.06174 |
| F3        | 0.055663 | 5.49394  | 0.130442 | 0.896349 | 0.931691 | -7.06687 |
| RAB1A     | -0.01525 | 7.247696 | -0.13026 | 0.896494 | 0.931772 | -7.10981 |
| ZCCHC10   | 0.018089 | 3.94125  | 0.129781 | 0.896872 | 0.932096 | -6.85822 |
| PCDH18    | -0.04975 | 4.010261 | -0.12956 | 0.897045 | 0.932206 | -6.88618 |
| MS4A4A    | 0.064249 | 1.880667 | 0.129285 | 0.897264 | 0.932295 | -6.41731 |
| RPL37A    | 0.025627 | 8.915994 | 0.129333 | 0.897225 | 0.932295 | -7.06182 |
| COPS8     | -0.01693 | 5.502341 | -0.12906 | 0.897439 | 0.932408 | -7.07333 |
| TMEM14B   | -0.02876 | 4.843824 | -0.12831 | 0.898037 | 0.932821 | -7.00867 |
| MTSS1L    | 0.040425 | 6.079913 | 0.128388 | 0.897972 | 0.932821 | -7.10444 |
| EDC4      | 0.016345 | 6.473275 | 0.128307 | 0.898037 | 0.932821 | -7.11543 |
| CHD8      | 0.016976 | 6.837556 | 0.127914 | 0.898348 | 0.933074 | -7.11667 |
| DYRK3     | 0.037799 | 3.060498 | 0.127753 | 0.898474 | 0.933087 | -6.65731 |
| SRRM1     | -0.01365 | 7.370446 | -0.12773 | 0.898494 | 0.933087 | -7.10772 |
| CXorf40B  | -0.01839 | 3.665332 | -0.12747 | 0.898696 | 0.933228 | -6.80378 |

|          |          |          |          |          |          |          |
|----------|----------|----------|----------|----------|----------|----------|
| NET1     | 0.027745 | 7.45228  | 0.127339 | 0.898801 | 0.933268 | -7.1068  |
| C9orf64  | 0.028133 | 3.935632 | 0.127019 | 0.899055 | 0.933404 | -6.85395 |
| CDKN2B   | -0.07943 | 4.292638 | -0.127   | 0.899066 | 0.933404 | -6.94151 |
| PICALM   | -0.01921 | 7.781024 | -0.12668 | 0.899326 | 0.933605 | -7.09828 |
| NES      | -0.04276 | 4.750981 | -0.12607 | 0.899803 | 0.93403  | -6.99984 |
| RNH1     | -0.02225 | 6.814989 | -0.12587 | 0.899963 | 0.934127 | -7.11686 |
| C12orf43 | -0.01693 | 3.400128 | -0.12565 | 0.900139 | 0.93424  | -6.74389 |
| SNAPC5   | 0.022325 | 1.833737 | 0.12402  | 0.901425 | 0.935288 | -6.41587 |
| DYNC2LI1 | 0.019585 | 3.668276 | 0.123967 | 0.901468 | 0.935288 | -6.79652 |
| FRS2     | -0.03013 | 5.743082 | -0.1241  | 0.90136  | 0.935288 | -7.09144 |
| MFGE8    | 0.036963 | 6.345609 | 0.12399  | 0.90145  | 0.935288 | -7.11324 |
| ATP6V0B  | 0.021598 | 6.600163 | 0.123948 | 0.901483 | 0.935288 | -7.11731 |
| NOL3     | -0.03167 | 3.850761 | -0.12379 | 0.901605 | 0.935345 | -6.85182 |
| C17orf76 | 0.067384 | 1.796978 | 0.123599 | 0.901758 | 0.935432 | -6.39958 |
| INTS12   | -0.01586 | 3.977323 | -0.12335 | 0.901958 | 0.935432 | -6.87255 |
| SYTL1    | -0.05467 | 5.231336 | -0.1235  | 0.901837 | 0.935432 | -7.05257 |
| SMARCAD1 | 0.018307 | 5.568173 | 0.123421 | 0.9019   | 0.935432 | -7.07661 |
| DEGS1    | -0.0288  | 6.037327 | -0.12326 | 0.902023 | 0.935432 | -7.10577 |
| DNAJC17  | 0.018844 | 2.704703 | 0.12305  | 0.902192 | 0.935495 | -6.58075 |
| HMG20B   | 0.022231 | 5.968048 | 0.123018 | 0.902218 | 0.935495 | -7.10088 |
| ZFR      | 0.014972 | 7.084926 | 0.122831 | 0.902366 | 0.935509 | -7.11415 |
| DBNL     | 0.022978 | 6.761574 | 0.122913 | 0.902301 | 0.935509 | -7.11776 |
| VPS29    | 0.018409 | 5.765454 | 0.122324 | 0.902767 | 0.935856 | -7.09032 |
| EIF4G3   | -0.01751 | 6.661288 | -0.1217  | 0.903259 | 0.936296 | -7.11795 |
| CCDC47   | 0.019784 | 6.956592 | 0.12151  | 0.90341  | 0.936383 | -7.11625 |
| ERAP1    | -0.03041 | 6.47242  | -0.12113 | 0.903711 | 0.936626 | -7.11685 |
| GPR39    | 0.077385 | 2.22193  | 0.120821 | 0.903956 | 0.93674  | -6.46898 |
| GPR107   | 0.018337 | 7.189783 | 0.12088  | 0.903909 | 0.93674  | -7.11263 |
| CD27     | 0.067588 | 1.459914 | 0.12072  | 0.904036 | 0.936754 | -6.3436  |
| CXorf26  | 0.028398 | 4.406569 | 0.120296 | 0.904371 | 0.937031 | -6.94466 |
| NCKAP1L  | -0.0532  | 3.240672 | -0.11989 | 0.904688 | 0.937291 | -6.71967 |
| SECTM1   | -0.04864 | 4.56101  | -0.11974 | 0.904812 | 0.937349 | -6.97604 |
| GGPS1    | 0.016836 | 5.072901 | 0.119487 | 0.905011 | 0.937486 | -7.03151 |
| AGA      | 0.026199 | 3.944021 | 0.11898  | 0.905412 | 0.937832 | -6.85957 |
| GSTO2    | -0.06046 | 3.228311 | -0.11845 | 0.905833 | 0.938051 | -6.70917 |
| APBA3    | 0.019201 | 4.03932  | 0.118311 | 0.905942 | 0.938051 | -6.87879 |
| FTH1     | -0.02719 | 10.13623 | -0.11829 | 0.905959 | 0.938051 | -7.01897 |
| TMEM168  | -0.02739 | 5.411371 | -0.11861 | 0.905705 | 0.938051 | -7.06779 |
| IDI1     | -0.02456 | 5.813693 | -0.11841 | 0.905864 | 0.938051 | -7.0957  |
| POLG     | 0.016876 | 6.100447 | 0.1179   | 0.906267 | 0.9383   | -7.10717 |
| SCHIP1   | 0.049903 | 3.621921 | 0.117706 | 0.90642  | 0.93832  | -6.78821 |
| WRN      | -0.02245 | 4.545572 | -0.11777 | 0.90637  | 0.93832  | -6.97143 |
| CIZ1     | -0.01702 | 6.901324 | -0.11754 | 0.90655  | 0.938385 | -7.11701 |
| IRX5     | -0.08144 | 2.175309 | -0.11739 | 0.906672 | 0.938423 | -6.49103 |
| FRRS1    | 0.043039 | 3.064161 | 0.117241 | 0.906788 | 0.938423 | -6.65502 |
| KIAA0114 | 0.0358   | 5.247619 | 0.117287 | 0.906752 | 0.938423 | -7.04777 |
| VPS37D   | 0.048638 | 0.271973 | 0.117138 | 0.90687  | 0.938438 | -6.15516 |
| KDSR     | -0.02031 | 6.268812 | -0.11696 | 0.907011 | 0.938515 | -7.11346 |
| LIPE     | -0.04194 | 2.693064 | -0.11643 | 0.907432 | 0.93888  | -6.5926  |
| COX6C    | 0.022413 | 6.628847 | 0.116158 | 0.907646 | 0.939032 | -7.11842 |
| LRRC23   | 0.02596  | 2.285732 | 0.115555 | 0.908123 | 0.939456 | -6.49753 |
| ALPK2    | 0.060613 | 0.645671 | 0.115239 | 0.908373 | 0.939645 | -6.20934 |
| SRCIN1   | -0.05853 | 2.502267 | -0.11508 | 0.908502 | 0.939709 | -6.55615 |
| RIC8B    | -0.01903 | 3.962519 | -0.11437 | 0.909059 | 0.940216 | -6.87093 |
| CCDC75   | -0.01863 | 2.168861 | -0.11388 | 0.909449 | 0.940349 | -6.48273 |
| COPG2    | 0.024644 | 3.199351 | 0.113943 | 0.909398 | 0.940349 | -6.692   |
| WFDC2    | 0.11245  | 3.404599 | 0.113902 | 0.909431 | 0.940349 | -6.71956 |
| TRIM38   | 0.023781 | 4.798475 | 0.11387  | 0.909457 | 0.940349 | -6.99975 |

|            |          |          |          |          |          |          |
|------------|----------|----------|----------|----------|----------|----------|
| DHTKD1     | -0.02519 | 5.390988 | -0.11346 | 0.909784 | 0.940617 | -7.06637 |
| LOC642852  | 0.031039 | 3.547982 | 0.113232 | 0.909962 | 0.940732 | -6.76844 |
| HOXA2      | -0.04515 | 0.487404 | -0.11285 | 0.910267 | 0.940977 | -6.20358 |
| SV2A       | -0.05696 | 2.270192 | -0.11276 | 0.910335 | 0.940978 | -6.51173 |
| FBXO2      | 0.068804 | 2.659286 | 0.112156 | 0.910814 | 0.941309 | -6.56682 |
| KIAA0664   | 0.020333 | 7.599699 | 0.1121   | 0.910858 | 0.941309 | -7.10527 |
| USF2       | 0.017712 | 6.320966 | 0.112136 | 0.910829 | 0.941309 | -7.11445 |
| IKZF3      | 0.07382  | 1.090739 | 0.111985 | 0.910949 | 0.941334 | -6.28087 |
| WIZ        | 0.018953 | 6.929603 | 0.111333 | 0.911465 | 0.941798 | -7.11776 |
| FRMD5      | -0.07333 | 0.256872 | -0.11103 | 0.911702 | 0.941973 | -6.16553 |
| NDNL2      | 0.019315 | 3.911357 | 0.110662 | 0.911997 | 0.942208 | -6.8549  |
| LOC550112  | 0.021552 | 3.220485 | 0.110132 | 0.912417 | 0.94257  | -6.69669 |
| UXT        | -0.0225  | 5.240636 | -0.11005 | 0.912482 | 0.94257  | -7.0529  |
| KCTD11     | -0.03743 | 4.750554 | -0.10931 | 0.913068 | 0.943106 | -7.00161 |
| 9-Mar      | 0.022784 | 4.195056 | 0.108886 | 0.913404 | 0.943382 | -6.91067 |
| TMEM140    | -0.02043 | 4.387606 | -0.10855 | 0.913669 | 0.943587 | -6.94958 |
| EPS8L2     | 0.034573 | 6.691553 | 0.108332 | 0.913842 | 0.943696 | -7.11944 |
| HYAL3      | 0.028578 | 1.86976  | 0.108224 | 0.913928 | 0.943714 | -6.42135 |
| EVI2B      | 0.045789 | 3.632404 | 0.107992 | 0.914111 | 0.943834 | -6.7878  |
| NCRNA00116 | -0.02815 | 3.204985 | -0.10766 | 0.914377 | 0.943969 | -6.70329 |
| PARP4      | -0.02857 | 6.987824 | -0.1077  | 0.914345 | 0.943969 | -7.11682 |
| LZIC       | 0.017661 | 4.304538 | 0.107491 | 0.914508 | 0.943972 | -6.93074 |
| SAT1       | 0.031718 | 8.039161 | 0.107482 | 0.914515 | 0.943972 | -7.09452 |
| TSLP       | -0.0601  | 0.698338 | -0.10727 | 0.914686 | 0.944009 | -6.24019 |
| NDUFAF4    | -0.02319 | 3.976693 | -0.10729 | 0.914671 | 0.944009 | -6.87647 |
| P2RY13     | -0.04943 | 0.511814 | -0.10653 | 0.915268 | 0.944539 | -6.20727 |
| ZNF169     | -0.024   | 2.235785 | -0.10623 | 0.915511 | 0.944721 | -6.49566 |
| FAM3A      | -0.01851 | 5.061343 | -0.10591 | 0.915761 | 0.944909 | -7.03477 |
| RBBP7      | 0.019084 | 6.92857  | 0.105686 | 0.915939 | 0.945023 | -7.11839 |
| NT5M       | 0.049323 | 0.133516 | 0.105348 | 0.916206 | 0.945159 | -6.13688 |
| ACSL5      | -0.07773 | 5.316313 | -0.10543 | 0.916144 | 0.945159 | -7.06404 |
| RNASEH1    | 0.014248 | 4.125834 | 0.104516 | 0.916866 | 0.945769 | -6.89975 |
| LOC115110  | -0.06348 | 1.733576 | -0.1039  | 0.917355 | 0.946161 | -6.40931 |
| ZNF77      | 0.020404 | 1.98424  | 0.103619 | 0.917577 | 0.946161 | -6.44448 |
| ST3GAL4    | -0.0402  | 4.11722  | -0.10381 | 0.917427 | 0.946161 | -6.91179 |
| FAM175B    | 0.01231  | 4.602314 | 0.103715 | 0.917501 | 0.946161 | -6.97663 |
| SEMA4C     | 0.02665  | 5.408775 | 0.103611 | 0.917584 | 0.946161 | -7.0655  |
| FCRL5      | -0.08469 | 0.519631 | -0.10323 | 0.917886 | 0.946402 | -6.21058 |
| ISM1       | -0.06388 | 1.14647  | -0.10288 | 0.918161 | 0.946587 | -6.31405 |
| THOC5      | -0.01654 | 4.85753  | -0.10266 | 0.918335 | 0.946587 | -7.01252 |
| ITPKC      | -0.02968 | 6.168648 | -0.10273 | 0.918283 | 0.946587 | -7.11258 |
| ELF1       | 0.019333 | 6.73688  | 0.102681 | 0.91832  | 0.946587 | -7.12009 |
| STYK1      | 0.03841  | 2.854968 | 0.102466 | 0.918491 | 0.946677 | -6.60708 |
| PRH1       | -0.02746 | 0.982783 | -0.10226 | 0.918653 | 0.946704 | -6.27829 |
| CAMK1D     | 0.049484 | 2.203515 | 0.102177 | 0.91872  | 0.946704 | -6.48306 |
| LCA5       | 0.028934 | 2.760234 | 0.102235 | 0.918674 | 0.946704 | -6.59599 |
| GNB2L1     | -0.02066 | 9.667289 | -0.10191 | 0.918935 | 0.946855 | -7.03731 |
| LOC440354  | 0.021804 | 3.434036 | 0.101762 | 0.919049 | 0.946903 | -6.74582 |
| RRAD       | 0.066657 | 2.677995 | 0.101473 | 0.919278 | 0.94707  | -6.57822 |
| RPRD2      | 0.013076 | 6.786353 | 0.101238 | 0.919464 | 0.947191 | -7.12002 |
| MDM2       | 0.02728  | 6.648684 | 0.101032 | 0.919627 | 0.947289 | -7.12012 |
| CLIP4      | -0.05076 | 4.724723 | -0.10073 | 0.919868 | 0.947467 | -7.00185 |
| URB1       | -0.01794 | 6.093892 | -0.1006  | 0.919969 | 0.947502 | -7.10997 |
| CANX       | 0.015722 | 9.477595 | 0.100118 | 0.920352 | 0.947826 | -7.04511 |
| C20orf7    | 0.01629  | 2.662483 | 0.100025 | 0.920426 | 0.947832 | -6.57626 |
| SAMD8      | 0.02399  | 3.352902 | 0.099875 | 0.920545 | 0.947885 | -6.72906 |
| MFN1       | -0.01597 | 5.877001 | -0.09971 | 0.920679 | 0.947954 | -7.10067 |
| C9orf3     | -0.02664 | 5.13956  | -0.09874 | 0.921446 | 0.948464 | -7.04509 |

|            |          |          |          |          |          |          |
|------------|----------|----------|----------|----------|----------|----------|
| PCBD1      | 0.024183 | 5.670328 | 0.098874 | 0.921339 | 0.948464 | -7.08619 |
| GBP2       | 0.033215 | 5.90954  | 0.098742 | 0.921443 | 0.948464 | -7.10034 |
| PPP1R11    | 0.017793 | 6.4153   | 0.098802 | 0.921395 | 0.948464 | -7.11775 |
| ANKRD36BP1 | 0.025715 | 4.081443 | 0.09863  | 0.921532 | 0.948482 | -6.88887 |
| CDC73      | 0.012857 | 5.919113 | 0.098429 | 0.921692 | 0.948576 | -7.10167 |
| URGCP      | -0.01663 | 5.613463 | -0.0981  | 0.921951 | 0.948774 | -7.08506 |
| NPC1       | -0.02387 | 6.517819 | -0.09786 | 0.922144 | 0.948902 | -7.11982 |
| EFNB3      | 0.057429 | 0.993454 | 0.097771 | 0.922213 | 0.948904 | -6.27055 |
| ZFP91      | -0.01232 | 7.012365 | -0.09725 | 0.922627 | 0.94926  | -7.11774 |
| B9D2       | 0.019325 | 1.578374 | 0.096997 | 0.922827 | 0.949395 | -6.37392 |
| PPP1R15A   | 0.029139 | 6.437232 | 0.096692 | 0.923069 | 0.949575 | -7.11819 |
| MORN1      | 0.024234 | 1.293524 | 0.096136 | 0.92351  | 0.949959 | -6.32375 |
| SSR1       | -0.0135  | 7.972992 | -0.09594 | 0.923663 | 0.950038 | -7.09646 |
| TAX1BP3    | -0.01939 | 6.760087 | -0.09587 | 0.923724 | 0.950038 | -7.12054 |
| C21orf70   | 0.020622 | 2.35036  | 0.095239 | 0.924222 | 0.950341 | -6.51273 |
| NQO2       | -0.0237  | 3.921761 | -0.0953  | 0.92417  | 0.950341 | -6.86452 |
| RAB11FIP1  | -0.04414 | 7.581061 | -0.09533 | 0.924151 | 0.950341 | -7.10607 |
| RPAP1      | -0.01513 | 5.334978 | -0.09502 | 0.924398 | 0.950451 | -7.0626  |
| RALGDS     | 0.020672 | 6.942394 | 0.094932 | 0.924465 | 0.950451 | -7.11931 |
| KLHL6      | 0.042959 | 2.759756 | 0.094676 | 0.924668 | 0.950488 | -6.59151 |
| SLC39A11   | 0.023685 | 4.716565 | 0.094544 | 0.924773 | 0.950488 | -6.98986 |
| CDK10      | 0.015209 | 5.039592 | 0.094579 | 0.924745 | 0.950488 | -7.03016 |
| ZBED5      | -0.01415 | 5.453364 | -0.09471 | 0.924645 | 0.950488 | -7.07297 |
| ZNF468     | -0.03729 | 3.927892 | -0.09429 | 0.924973 | 0.950623 | -6.86825 |
| MAFG       | -0.01844 | 5.955904 | -0.09411 | 0.925121 | 0.950705 | -7.10509 |
| SETD8      | 0.017069 | 5.424816 | 0.093683 | 0.925456 | 0.950979 | -7.06852 |
| FSTL3      | -0.04224 | 4.435675 | -0.09343 | 0.92566  | 0.951069 | -6.9627  |
| MED21      | 0.019831 | 5.024454 | 0.093345 | 0.925724 | 0.951069 | -7.02878 |
| PROM2      | -0.05627 | 6.658481 | -0.09332 | 0.925747 | 0.951069 | -7.12104 |
| LOC151009  | 0.035003 | 1.433074 | 0.092737 | 0.926207 | 0.951318 | -6.34342 |
| KIF7       | 0.037748 | 2.49192  | 0.092686 | 0.926247 | 0.951318 | -6.54111 |
| CD37       | 0.039899 | 3.517032 | 0.092582 | 0.926329 | 0.951318 | -6.76602 |
| MAPK8      | -0.0176  | 3.531465 | -0.0928  | 0.926158 | 0.951318 | -6.77809 |
| MUS81      | -0.01206 | 4.635279 | -0.09261 | 0.926304 | 0.951318 | -6.98478 |
| FAM103A1   | 0.014019 | 3.791041 | 0.092214 | 0.926622 | 0.951519 | -6.82988 |
| ABCA7      | 0.028824 | 4.631881 | 0.092163 | 0.926662 | 0.951519 | -6.97966 |
| SFRS14     | -0.01352 | 5.987824 | -0.09208 | 0.926732 | 0.951521 | -7.10641 |
| UQCRH      | 0.016389 | 6.022393 | 0.09197  | 0.926815 | 0.951536 | -7.10676 |
| RBM39      | -0.01331 | 7.465227 | -0.09161 | 0.927104 | 0.951623 | -7.10966 |
| ZBED1      | -0.01956 | 6.078321 | -0.0917  | 0.927029 | 0.951623 | -7.11029 |
| TSTA3      | 0.02797  | 6.400154 | 0.091651 | 0.927068 | 0.951623 | -7.11796 |
| METTL2B    | -0.0148  | 4.005897 | -0.09083 | 0.927723 | 0.952189 | -6.88162 |
| LOC283922  | 0.01965  | 2.464799 | 0.090654 | 0.927859 | 0.952259 | -6.53514 |
| PTPRCAP    | 0.039718 | 2.218408 | 0.090483 | 0.927995 | 0.952329 | -6.4862  |
| COL6A1     | 0.037321 | 8.444767 | 0.090374 | 0.928082 | 0.952347 | -7.08329 |
| KRAS       | -0.02812 | 6.665751 | -0.09027 | 0.928161 | 0.952358 | -7.1213  |
| TRIM46     | 0.03459  | 0.758847 | 0.08906  | 0.929124 | 0.953277 | -6.23474 |
| SLC37A4    | 0.024544 | 4.063442 | 0.088736 | 0.929382 | 0.953471 | -6.88379 |
| SFRS16     | -0.01107 | 4.783484 | -0.08834 | 0.929696 | 0.953653 | -7.0039  |
| SLC2A3     | -0.03581 | 4.78393  | -0.08836 | 0.929676 | 0.953653 | -7.00815 |
| RPL9       | 0.024971 | 3.248295 | 0.088089 | 0.929895 | 0.953732 | -6.70592 |
| EIF2S3     | 0.014204 | 7.262239 | 0.088071 | 0.929909 | 0.953732 | -7.11464 |
| EML2       | -0.01807 | 5.171774 | -0.08786 | 0.93008  | 0.953767 | -7.04781 |
| UBN1       | -0.01194 | 6.620983 | -0.08791 | 0.930039 | 0.953767 | -7.12139 |
| CLIC3      | 0.064382 | 3.140837 | 0.087435 | 0.930414 | 0.953926 | -6.67374 |
| CCDC64B    | 0.046604 | 4.182091 | 0.087403 | 0.93044  | 0.953926 | -6.90088 |
| TEX261     | -0.01066 | 7.034261 | -0.08745 | 0.930403 | 0.953926 | -7.11831 |
| EVI2A      | 0.032797 | 2.113422 | 0.087228 | 0.930579 | 0.953999 | -6.46875 |

|           |          |          |          |          |          |          |
|-----------|----------|----------|----------|----------|----------|----------|
| CTNNBL1   | 0.011811 | 5.234065 | 0.086141 | 0.931442 | 0.954813 | -7.05166 |
| DNAJA4    | 0.027671 | 5.680924 | 0.086017 | 0.93154  | 0.954844 | -7.08828 |
| CLASP1    | -0.01683 | 6.556246 | -0.08497 | 0.932371 | 0.955626 | -7.12132 |
| TTC13     | -0.01523 | 4.428153 | -0.08467 | 0.932607 | 0.955674 | -6.95652 |
| TMEM45B   | 0.073852 | 4.700411 | 0.084658 | 0.932619 | 0.955674 | -6.98214 |
| C22orf29  | 0.01878  | 4.976627 | 0.084653 | 0.932623 | 0.955674 | -7.02405 |
| MON1A     | 0.016719 | 3.520892 | 0.084361 | 0.932855 | 0.955782 | -6.76834 |
| SDC4      | 0.024289 | 7.951259 | 0.084262 | 0.932934 | 0.955782 | -7.09913 |
| VGLL4     | -0.01574 | 6.397248 | -0.08432 | 0.93289  | 0.955782 | -7.11931 |
| SIRT7     | 0.018274 | 4.431718 | 0.084172 | 0.933005 | 0.955784 | -6.9525  |
| PLCG2     | -0.02606 | 4.055122 | -0.08404 | 0.933108 | 0.95582  | -6.8948  |
| C19orf12  | -0.01892 | 4.333327 | -0.08372 | 0.933367 | 0.955912 | -6.94385 |
| MTM1      | 0.015482 | 4.381081 | 0.083602 | 0.933457 | 0.955912 | -6.94579 |
| ACE       | 0.035724 | 5.024573 | 0.083584 | 0.933472 | 0.955912 | -7.02702 |
| ORMDL3    | 0.023462 | 5.273914 | 0.083631 | 0.933435 | 0.955912 | -7.05438 |
| NRSN2     | 0.027583 | 4.617128 | 0.083426 | 0.933597 | 0.955971 | -6.98    |
| ZNF212    | 0.015979 | 3.622287 | 0.083247 | 0.933739 | 0.956018 | -6.79237 |
| MRPS31    | -0.01508 | 3.703    | -0.08315 | 0.933815 | 0.956018 | -6.8167  |
| GGT5      | -0.02999 | 3.960308 | -0.08311 | 0.933849 | 0.956018 | -6.87683 |
| SGPP2     | -0.03821 | 4.829676 | -0.08243 | 0.93439  | 0.956502 | -7.01152 |
| TRMT5     | -0.01184 | 4.423649 | -0.08218 | 0.934583 | 0.95663  | -6.95677 |
| GJC1      | 0.031714 | 3.54767  | 0.081813 | 0.934878 | 0.956792 | -6.77545 |
| MRPL49    | 0.011822 | 5.933494 | 0.081819 | 0.934874 | 0.956792 | -7.10388 |
| CWC25     | -0.01226 | 4.361061 | -0.08165 | 0.935012 | 0.956858 | -6.947   |
| MGST2     | -0.02206 | 5.070992 | -0.0814  | 0.935203 | 0.956914 | -7.03846 |
| CDR2L     | -0.02808 | 5.579536 | -0.08146 | 0.935158 | 0.956914 | -7.08454 |
| CENPV     | -0.04295 | 2.999236 | -0.0807  | 0.935766 | 0.957352 | -6.65647 |
| ZCCHC17   | 0.011219 | 4.688561 | 0.080679 | 0.935779 | 0.957352 | -6.99028 |
| MED22     | -0.01269 | 5.199089 | -0.08061 | 0.935837 | 0.957352 | -7.05095 |
| FAM113A   | 0.016365 | 4.114315 | 0.08042  | 0.935985 | 0.957433 | -6.89838 |
| SFRS6     | -0.01247 | 6.921108 | -0.07992 | 0.936384 | 0.957772 | -7.12052 |
| DLG5      | 0.016967 | 7.041252 | 0.079555 | 0.936672 | 0.957996 | -7.11926 |
| RBM4B     | 0.012613 | 3.357237 | 0.079189 | 0.936962 | 0.958153 | -6.73323 |
| EXPH5     | -0.02714 | 4.850549 | -0.07925 | 0.936914 | 0.958153 | -7.01391 |
| CBL       | -0.01394 | 5.957518 | -0.07899 | 0.937121 | 0.958244 | -7.10627 |
| SLC4A5    | -0.01742 | 3.32343  | -0.07869 | 0.937362 | 0.958421 | -6.72961 |
| CECR1     | 0.034538 | 4.873789 | 0.078463 | 0.93754  | 0.958532 | -7.01139 |
| MRPL53    | -0.01534 | 4.312095 | -0.0783  | 0.937669 | 0.958594 | -6.93959 |
| UBLCP1    | -0.01382 | 4.838006 | -0.07812 | 0.937813 | 0.958672 | -7.01205 |
| LOC554202 | -0.06332 | 0.946795 | -0.07791 | 0.937981 | 0.958773 | -6.27817 |
| C22orf46  | -0.01294 | 3.88645  | -0.07713 | 0.938599 | 0.959334 | -6.85733 |
| EEF1D     | 0.01529  | 7.887721 | 0.076962 | 0.938732 | 0.9594   | -7.10126 |
| SCARNA2   | -0.02549 | 0.063391 | -0.07658 | 0.939036 | 0.959436 | -6.13649 |
| TBC1D10C  | -0.03385 | 0.9655   | -0.07631 | 0.939249 | 0.959436 | -6.28018 |
| PPCDC     | 0.014555 | 2.520117 | 0.076161 | 0.939368 | 0.959436 | -6.54715 |
| TIAM1     | -0.04849 | 4.049098 | -0.07629 | 0.939264 | 0.959436 | -6.90221 |
| ARL4A     | -0.01972 | 4.692142 | -0.07614 | 0.939385 | 0.959436 | -6.99473 |
| VANGL2    | -0.05062 | 4.797396 | -0.07647 | 0.939123 | 0.959436 | -7.01272 |
| FN1       | 0.041946 | 10.19282 | 0.076234 | 0.93931  | 0.959436 | -7.02339 |
| LIMS1     | -0.01386 | 5.151152 | -0.07664 | 0.938984 | 0.959436 | -7.04668 |
| UNK       | 0.010478 | 5.29394  | 0.076284 | 0.939271 | 0.959436 | -7.05844 |
| TMEM63A   | 0.029383 | 6.221718 | 0.075903 | 0.939573 | 0.959558 | -7.11485 |
| NTRK2     | 0.081287 | 4.330165 | 0.075105 | 0.940207 | 0.960066 | -6.93156 |
| BNIP3L    | -0.01656 | 6.485756 | -0.07515 | 0.94017  | 0.960066 | -7.12138 |
| INPP5D    | -0.0342  | 4.384012 | -0.07486 | 0.940401 | 0.960193 | -6.95406 |
| C18orf21  | 0.013872 | 2.908587 | 0.074506 | 0.940683 | 0.960341 | -6.63102 |
| ZNF592    | 0.011996 | 6.348583 | 0.07459  | 0.940617 | 0.960341 | -7.11868 |
| PLAG1     | -0.03901 | 2.817249 | -0.07434 | 0.940817 | 0.960408 | -6.62293 |



|          |          |          |          |          |          |          |
|----------|----------|----------|----------|----------|----------|----------|
| BTBD12   | -0.01113 | 4.413902 | -0.074   | 0.941083 | 0.960609 | -6.9554  |
| DNMT3A   | -0.01703 | 4.566696 | -0.07318 | 0.941739 | 0.961208 | -6.97844 |
| POLM     | -0.01325 | 4.701295 | -0.0729  | 0.941956 | 0.96136  | -6.99501 |
| NSUN5P1  | 0.017838 | 2.791183 | 0.072645 | 0.942162 | 0.9615   | -6.60179 |
| NSUN3    | -0.01398 | 2.924112 | -0.07225 | 0.942477 | 0.96175  | -6.63903 |
| CDC42SE2 | 0.014031 | 5.801918 | 0.072148 | 0.942557 | 0.961762 | -7.09748 |
| TP53I3   | -0.02395 | 3.782341 | -0.07159 | 0.942999 | 0.962143 | -6.83812 |
| C1orf212 | -0.00907 | 4.743823 | -0.07117 | 0.943336 | 0.962346 | -7.00042 |
| DIAPH1   | 0.01299  | 7.898283 | 0.071226 | 0.94329  | 0.962346 | -7.10133 |
| FAM69B   | 0.02435  | 2.754265 | 0.071059 | 0.943422 | 0.962364 | -6.59829 |
| GALNT4   | 0.035018 | 5.588628 | 0.0706   | 0.943788 | 0.962666 | -7.0815  |
| MXD1     | 0.027629 | 6.765758 | 0.07045  | 0.943907 | 0.962718 | -7.12283 |
| ANKRD49  | -0.01302 | 4.175875 | -0.07032 | 0.944008 | 0.96275  | -6.9154  |
| DYRK4    | 0.016689 | 3.44953  | 0.070163 | 0.944135 | 0.96281  | -6.75515 |
| HSN2     | -0.02597 | 0.988578 | -0.06993 | 0.944322 | 0.96293  | -6.28297 |
| DBNDD2   | 0.020086 | 5.268792 | 0.069073 | 0.945001 | 0.963552 | -7.05594 |
| DNAJC11  | 0.00974  | 5.768492 | 0.068663 | 0.945328 | 0.963815 | -7.09603 |
| DPM2     | 0.013404 | 5.465445 | 0.068406 | 0.945532 | 0.963953 | -7.07338 |
| HLA-L    | 0.023471 | 0.248842 | 0.068238 | 0.945665 | 0.964018 | -6.15834 |
| MARS     | -0.01065 | 6.534619 | -0.06811 | 0.945764 | 0.964049 | -7.12233 |
| MIPEP    | 0.013637 | 4.069183 | 0.068005 | 0.94585  | 0.964066 | -6.89117 |
| ZC3HC1   | 0.01221  | 3.608685 | 0.067875 | 0.945953 | 0.964101 | -6.79089 |
| PRKRIR   | -0.0136  | 5.876616 | -0.0675  | 0.946249 | 0.964332 | -7.10316 |
| GALC     | 0.029306 | 5.171016 | 0.067378 | 0.946349 | 0.964364 | -7.04477 |
| INPP4A   | -0.01352 | 5.096815 | -0.06724 | 0.946461 | 0.964407 | -7.04174 |
| PLEKHG1  | -0.01923 | 5.17807  | -0.06707 | 0.946595 | 0.964474 | -7.05054 |
| COPS3    | 0.011531 | 5.636892 | 0.066952 | 0.946688 | 0.964498 | -7.08764 |
| UBE2F    | -0.01029 | 4.824246 | -0.06662 | 0.946952 | 0.964697 | -7.01079 |
| BCL2L14  | -0.05741 | 1.017763 | -0.06626 | 0.947238 | 0.964865 | -6.28279 |
| CDHR5    | -0.08308 | 1.97825  | -0.06606 | 0.947393 | 0.964865 | -6.4536  |
| POLR1E   | 0.012408 | 4.218303 | 0.066082 | 0.947379 | 0.964865 | -6.92133 |
| ZNF777   | 0.011505 | 4.796315 | 0.066202 | 0.947284 | 0.964865 | -7.005   |
| C10orf75 | 0.02126  | 1.978699 | 0.065762 | 0.947633 | 0.964969 | -6.44677 |
| ADAM23   | -0.05844 | 2.047393 | -0.06579 | 0.947613 | 0.964969 | -6.47702 |
| CLUAP1   | 0.01664  | 3.870501 | 0.06555  | 0.947803 | 0.965011 | -6.85092 |
| LPAR5    | -0.02339 | 4.237863 | -0.06552 | 0.947826 | 0.965011 | -6.92687 |
| COMT     | -0.01242 | 6.291873 | -0.06545 | 0.947883 | 0.965011 | -7.11854 |
| FAM83E   | -0.05326 | 3.203447 | -0.06511 | 0.948152 | 0.965215 | -6.69843 |
| ZNF572   | 0.028844 | 0.915706 | 0.064937 | 0.94829  | 0.965281 | -6.26349 |
| OTUD5    | 0.008677 | 5.917125 | 0.064855 | 0.948355 | 0.965281 | -7.10448 |
| CNIH3    | 0.032777 | 0.163629 | 0.064581 | 0.948573 | 0.965323 | -6.14495 |
| USE1     | -0.01305 | 3.464949 | -0.06454 | 0.948603 | 0.965323 | -6.76317 |
| ZFPM1    | 0.021747 | 4.950362 | 0.06459  | 0.948566 | 0.965323 | -7.02076 |
| ADC      | 0.023611 | 0.769233 | 0.064347 | 0.948759 | 0.965377 | -6.24092 |
| GUCY1A3  | 0.028537 | 4.827877 | 0.064226 | 0.948856 | 0.965377 | -7.00795 |
| NDUFS8   | -0.01467 | 6.321339 | -0.06422 | 0.948864 | 0.965377 | -7.11932 |
| YJEFN3   | -0.0254  | 1.498187 | -0.06402 | 0.949016 | 0.965462 | -6.36906 |
| MGC57346 | 0.012918 | 3.260411 | 0.063747 | 0.949237 | 0.965616 | -6.71409 |
| NHS      | -0.02359 | 4.176258 | -0.06298 | 0.949845 | 0.966094 | -6.91926 |
| HPS4     | -0.0103  | 5.569597 | -0.06299 | 0.949838 | 0.966094 | -7.08418 |
| CKAP4    | -0.01483 | 7.402335 | -0.06278 | 0.950008 | 0.966189 | -7.11321 |
| VPS16    | -0.00874 | 5.058281 | -0.06267 | 0.950093 | 0.966206 | -7.03717 |
| BPHL     | -0.01405 | 3.403033 | -0.06181 | 0.950774 | 0.966827 | -6.74857 |
| ZNF821   | -0.01354 | 2.12241  | -0.06172 | 0.950844 | 0.966829 | -6.47923 |
| MOSPD1   | -0.01237 | 3.869373 | -0.06145 | 0.951061 | 0.966979 | -6.85682 |
| KIAA1107 | -0.01994 | 1.954696 | -0.06127 | 0.95121  | 0.96706  | -6.44998 |
| SLC26A2  | -0.0175  | 4.925972 | -0.06113 | 0.951315 | 0.967097 | -7.02411 |
| INHBB    | 0.030558 | 3.160406 | 0.06092  | 0.951485 | 0.967199 | -6.69299 |

|           |          |          |          |          |          |          |
|-----------|----------|----------|----------|----------|----------|----------|
| LOC219347 | -0.02999 | 0.730305 | -0.0607  | 0.951656 | 0.967303 | -6.24346 |
| WDSUB1    | -0.01122 | 2.878209 | -0.05985 | 0.952333 | 0.96792  | -6.63008 |
| SLC16A5   | 0.026174 | 4.078408 | 0.058685 | 0.953262 | 0.968723 | -6.88812 |
| TAF8      | -0.01102 | 4.64885  | -0.05873 | 0.95323  | 0.968723 | -6.989   |
| PLK3      | 0.016351 | 4.460017 | 0.058479 | 0.953427 | 0.96882  | -6.96093 |
| SERINC5   | 0.017956 | 4.476242 | 0.057996 | 0.95381  | 0.969139 | -6.96136 |
| TET1      | 0.025557 | 1.991836 | 0.057655 | 0.954082 | 0.969345 | -6.45142 |
| LOC348926 | 0.01348  | 1.434318 | 0.057207 | 0.954438 | 0.969636 | -6.35273 |
| LOC283663 | 0.024418 | 0.413708 | 0.056137 | 0.95529  | 0.970431 | -6.18393 |
| PON3      | -0.04749 | 0.027805 | -0.05586 | 0.955512 | 0.97058  | -6.13747 |
| PRTFDC1   | 0.023725 | 3.020903 | 0.055777 | 0.955576 | 0.97058  | -6.65214 |
| NUFIP2    | -0.00888 | 7.412126 | -0.05561 | 0.955712 | 0.970649 | -7.11354 |
| GPATCH3   | 0.007397 | 3.056589 | 0.055488 | 0.955806 | 0.970653 | -6.66617 |
| AURKAIP1  | -0.0105  | 5.704433 | -0.05543 | 0.955856 | 0.970653 | -7.09396 |
| MYO6      | 0.015769 | 6.960594 | 0.055057 | 0.956149 | 0.97088  | -7.122   |
| RPSAP9    | 0.015221 | 0.042232 | 0.05465  | 0.956473 | 0.971068 | -6.1296  |
| C3orf17   | -0.00856 | 5.5242   | -0.05472 | 0.956415 | 0.971068 | -7.08121 |
| RPPH1     | -0.02006 | 4.754011 | -0.05442 | 0.956654 | 0.971182 | -7.00296 |
| FEZ1      | 0.023334 | 2.980971 | 0.054111 | 0.956901 | 0.971362 | -6.64892 |
| NUDC      | 0.008509 | 6.043991 | 0.053909 | 0.957062 | 0.971455 | -7.11076 |
| DDX26B    | -0.01591 | 3.036236 | -0.05326 | 0.957576 | 0.971886 | -6.66979 |
| APOO      | 0.012456 | 3.262721 | 0.0532   | 0.957626 | 0.971886 | -6.7105  |
| LRRC34    | -0.01854 | 1.235552 | -0.05296 | 0.957815 | 0.972007 | -6.3242  |
| ACCN2     | -0.01989 | 2.562577 | -0.05264 | 0.958075 | 0.972164 | -6.56368 |
| FGFR1OP2  | -0.01029 | 4.523635 | -0.05259 | 0.958109 | 0.972164 | -6.97275 |
| NBPF16    | -0.02645 | 0.929241 | -0.05244 | 0.958229 | 0.972215 | -6.27357 |
| DBP       | 0.01483  | 3.885918 | 0.052054 | 0.958538 | 0.972388 | -6.85269 |
| PCNXL2    | 0.011834 | 4.658725 | 0.052078 | 0.958519 | 0.972388 | -6.98841 |
| FAM156A   | -0.01041 | 4.505001 | -0.05099 | 0.959386 | 0.973177 | -6.96992 |
| MAP2K2    | 0.008302 | 6.634842 | 0.050902 | 0.959455 | 0.973177 | -7.12394 |
| SMYD2     | -0.00879 | 4.813029 | -0.05072 | 0.959602 | 0.973255 | -7.00983 |
| CD46      | 0.010028 | 8.110556 | 0.050394 | 0.959859 | 0.973445 | -7.09622 |
| RPL6      | 0.009264 | 7.955926 | 0.050129 | 0.96007  | 0.973588 | -7.10092 |
| ADORA2A   | -0.01643 | 1.497631 | -0.04976 | 0.960364 | 0.973674 | -6.36994 |
| XPNPEP3   | -0.0077  | 4.090334 | -0.04983 | 0.96031  | 0.973674 | -6.90014 |
| PITPNB    | 0.007947 | 6.488408 | 0.049835 | 0.960304 | 0.973674 | -7.12273 |
| ASTE1     | -0.00838 | 3.289472 | -0.04935 | 0.96069  | 0.973831 | -6.72269 |
| NLK       | 0.008403 | 4.408649 | 0.049303 | 0.960727 | 0.973831 | -6.95285 |
| CXCR4     | 0.020879 | 4.811623 | 0.04942  | 0.960634 | 0.973831 | -7.0071  |
| MFF       | 0.007146 | 5.50338  | 0.049176 | 0.960829 | 0.973833 | -7.07876 |
| MMADHC    | 0.006002 | 6.384069 | 0.049126 | 0.960869 | 0.973833 | -7.12106 |
| HCG4      | 0.033745 | 0.063236 | 0.04857  | 0.961311 | 0.974156 | -6.1319  |
| TLE3      | 0.008935 | 6.567979 | 0.04855  | 0.961327 | 0.974156 | -7.12363 |
| PRKAG1    | -0.00662 | 5.218297 | -0.04845 | 0.961403 | 0.974163 | -7.05453 |
| TMEM91    | -0.01781 | 1.816334 | -0.04827 | 0.961551 | 0.974241 | -6.42692 |
| TRMT2B    | -0.00825 | 4.490719 | -0.04796 | 0.961796 | 0.974419 | -6.96767 |
| PCYOX1L   | 0.010841 | 3.340095 | 0.047871 | 0.961868 | 0.974421 | -6.73168 |
| CHST7     | -0.01946 | 2.528357 | -0.04744 | 0.962213 | 0.9747   | -6.55946 |
| FAM200A   | 0.011817 | 2.995276 | 0.046715 | 0.962788 | 0.975008 | -6.65277 |
| RRAS2     | 0.015806 | 4.475424 | 0.046564 | 0.962908 | 0.975008 | -6.96308 |
| FAM55C    | -0.01729 | 4.446086 | -0.04694 | 0.962607 | 0.975008 | -6.96411 |
| LOC550643 | -0.01291 | 4.508457 | -0.04653 | 0.962935 | 0.975008 | -6.97168 |
| CARS2     | 0.008081 | 4.821757 | 0.046627 | 0.962858 | 0.975008 | -7.00906 |
| CC2D1A    | 0.007532 | 5.733566 | 0.046671 | 0.962822 | 0.975008 | -7.09531 |
| GPR35     | -0.04034 | 2.834857 | -0.04622 | 0.963184 | 0.975075 | -6.61836 |
| PTPRU     | 0.020893 | 4.98918  | 0.046139 | 0.963246 | 0.975075 | -7.02836 |
| VAR2      | -0.00869 | 5.052617 | -0.04609 | 0.963281 | 0.975075 | -7.03732 |
| EIF5B     | 0.008611 | 7.914966 | 0.046314 | 0.963107 | 0.975075 | -7.10225 |

|           |          |          |          |          |          |          |
|-----------|----------|----------|----------|----------|----------|----------|
| RICTOR    | -0.01016 | 6.047031 | -0.04593 | 0.963409 | 0.975134 | -7.11194 |
| CORIN     | -0.02255 | 0.276458 | -0.04578 | 0.963531 | 0.975187 | -6.17235 |
| ZNF90     | -0.01222 | 3.804716 | -0.04563 | 0.963648 | 0.975234 | -6.84198 |
| MAP3K9    | -0.01389 | 3.904991 | -0.04536 | 0.963864 | 0.975382 | -6.86309 |
| MOSPD3    | 0.010019 | 4.223188 | 0.044834 | 0.964285 | 0.975687 | -6.92271 |
| KIAA0226  | -0.00771 | 5.529279 | -0.04481 | 0.964304 | 0.975687 | -7.08209 |
| C12orf73  | 0.007386 | 2.424351 | 0.044553 | 0.964509 | 0.975823 | -6.53222 |
| HCCS      | 0.00706  | 4.683053 | 0.044188 | 0.964799 | 0.976046 | -6.99231 |
| FUK       | -0.00919 | 4.159549 | -0.04369 | 0.965197 | 0.976378 | -6.9133  |
| BTF3L4    | 0.006968 | 5.217316 | 0.042347 | 0.966265 | 0.977388 | -7.05362 |
| UBE2E2    | 0.013475 | 3.614588 | 0.041931 | 0.966596 | 0.977581 | -6.79817 |
| SF3B1     | -0.00535 | 8.49478  | -0.04196 | 0.96657  | 0.977581 | -7.08331 |
| TRAF3IP1  | -0.00661 | 4.483757 | -0.04174 | 0.966748 | 0.977664 | -6.96699 |
| INTS5     | 0.006666 | 5.326141 | 0.041596 | 0.966863 | 0.977709 | -7.0637  |
| ARRB2     | 0.007942 | 4.82295  | 0.041275 | 0.967118 | 0.977897 | -7.00942 |
| LRIG2     | -0.00667 | 4.026035 | -0.04087 | 0.967439 | 0.97815  | -6.88766 |
| GLTP      | 0.018674 | 6.24996  | 0.040614 | 0.967645 | 0.978288 | -7.11811 |
| GNG10     | 0.007563 | 4.326492 | 0.040492 | 0.967742 | 0.978315 | -6.94188 |
| TMC4      | 0.020756 | 5.044777 | 0.04025  | 0.967935 | 0.978382 | -7.03225 |
| RRM2B     | -0.00757 | 5.431782 | -0.04023 | 0.967949 | 0.978382 | -7.07421 |
| SPIRE2    | 0.021697 | 3.3476   | 0.039754 | 0.968329 | 0.978648 | -6.72472 |
| TET2      | 0.008838 | 5.630683 | 0.039639 | 0.968421 | 0.978648 | -7.08871 |
| ERMP1     | -0.01171 | 6.233556 | -0.03965 | 0.968412 | 0.978648 | -7.11834 |
| PATZ1     | -0.00887 | 5.14778  | -0.03878 | 0.969101 | 0.979264 | -7.04788 |
| TIMM22    | -0.00642 | 3.863235 | -0.03814 | 0.969612 | 0.979709 | -6.85423 |
| ZNF670    | 0.008652 | 2.001309 | 0.037965 | 0.969754 | 0.979781 | -6.45401 |
| AKAP8L    | 0.004838 | 5.0631   | 0.037652 | 0.970003 | 0.979963 | -7.03782 |
| CHCHD5    | 0.008928 | 3.923412 | 0.037373 | 0.970226 | 0.980117 | -6.86252 |
| KIAA1024  | 0.012931 | 1.233053 | 0.036213 | 0.971149 | 0.980979 | -6.31776 |
| ZNF414    | -0.00638 | 3.754798 | -0.03565 | 0.9716   | 0.981364 | -6.82989 |
| FBXL8     | 0.008319 | 2.942003 | 0.034757 | 0.972308 | 0.982008 | -6.6389  |
| SDK2      | 0.025715 | 3.066473 | 0.034486 | 0.972524 | 0.982155 | -6.66869 |
| CGN       | -0.02392 | 5.365515 | -0.03413 | 0.972811 | 0.982373 | -7.0688  |
| TPST1     | 0.011683 | 3.998091 | 0.033824 | 0.973052 | 0.982545 | -6.88266 |
| AGAP3     | -0.00673 | 6.053841 | -0.03373 | 0.973127 | 0.98255  | -7.11262 |
| CATSPER2  | 0.011341 | 1.038487 | 0.033289 | 0.973478 | 0.982779 | -6.28572 |
| RNF111    | -0.00488 | 5.451551 | -0.03327 | 0.973495 | 0.982779 | -7.07593 |
| C15orf61  | -0.00711 | 2.568633 | -0.03301 | 0.973703 | 0.982919 | -6.56353 |
| PARK7     | -0.00491 | 6.503346 | -0.03289 | 0.973795 | 0.98294  | -7.12373 |
| C9orf122  | -0.01646 | 0.61516  | -0.03272 | 0.973928 | 0.983004 | -6.22225 |
| NAT1      | 0.01279  | 2.274679 | 0.032575 | 0.974046 | 0.983052 | -6.50021 |
| HHIPL1    | -0.01247 | 1.308778 | -0.03244 | 0.974155 | 0.983091 | -6.33826 |
| POMZP3    | 0.008203 | 2.586456 | 0.03204  | 0.974473 | 0.98334  | -6.56499 |
| TM2D1     | 0.005589 | 3.646242 | 0.03186  | 0.974616 | 0.983414 | -6.80319 |
| MRPS18A   | -0.00739 | 4.969584 | -0.03128 | 0.975077 | 0.983808 | -7.02854 |
| RBBP9     | 0.005197 | 5.00409  | 0.031006 | 0.975296 | 0.983958 | -7.03181 |
| FAM160A1  | -0.01206 | 3.917556 | -0.03058 | 0.975636 | 0.984103 | -6.86633 |
| GTF2B     | -0.00432 | 4.557973 | -0.03063 | 0.975596 | 0.984103 | -6.97761 |
| PTPRK     | 0.006688 | 7.280597 | 0.030561 | 0.975651 | 0.984103 | -7.11755 |
| BRAP      | -0.00413 | 4.717371 | -0.03046 | 0.975733 | 0.984114 | -6.99865 |
| C3orf33   | 0.007394 | 1.717904 | 0.030226 | 0.975918 | 0.98423  | -6.40439 |
| PRKCQ     | 0.016117 | 0.722661 | 0.029948 | 0.976139 | 0.984382 | -6.23675 |
| RAB40B    | -0.00804 | 4.212474 | -0.02957 | 0.976436 | 0.984468 | -6.92294 |
| LOC144438 | -0.00401 | 5.096802 | -0.02961 | 0.976408 | 0.984468 | -7.04258 |
| LARP1     | -0.00395 | 8.216444 | -0.02971 | 0.976332 | 0.984468 | -7.09331 |
| LYL1      | 0.008779 | 1.271212 | 0.029055 | 0.97685  | 0.984815 | -6.32803 |
| GTF3C6    | 0.005397 | 4.766885 | 0.028835 | 0.977025 | 0.984849 | -7.00369 |
| MMP2      | 0.012886 | 7.797687 | 0.028846 | 0.977016 | 0.984849 | -7.10619 |

|              |          |          |          |          |          |          |
|--------------|----------|----------|----------|----------|----------|----------|
| TFF3         | -0.03204 | 1.876677 | -0.02847 | 0.977317 | 0.985073 | -6.43384 |
| PI4K2A       | 0.005066 | 5.694008 | 0.027998 | 0.977692 | 0.985308 | -7.09378 |
| C6orf106     | -0.00383 | 7.297029 | -0.02804 | 0.977661 | 0.985308 | -7.11713 |
| E4F1         | 0.003685 | 4.559481 | 0.026893 | 0.978572 | 0.986124 | -6.97711 |
| MCOLN1       | 0.004248 | 4.178986 | 0.026599 | 0.978807 | 0.986289 | -6.91674 |
| ZNF28        | 0.009448 | 4.077765 | 0.026428 | 0.978943 | 0.986355 | -6.89584 |
| ZBTB6        | -0.00393 | 4.260195 | -0.02607 | 0.979231 | 0.986558 | -6.93193 |
| RALGAPB      | 0.003832 | 6.908483 | 0.025998 | 0.979285 | 0.986558 | -7.12371 |
| LOC100272146 | 0.008259 | 1.475066 | 0.025426 | 0.979741 | 0.986751 | -6.36096 |
| UBE2MP1      | 0.004693 | 3.47291  | 0.025492 | 0.979688 | 0.986751 | -6.76473 |
| CD24         | -0.0138  | 9.212167 | -0.0254  | 0.979759 | 0.986751 | -7.05789 |
| FASTK        | -0.00452 | 5.723609 | -0.02554 | 0.979647 | 0.986751 | -7.09604 |
| PGAP3        | 0.010078 | 5.108772 | 0.024602 | 0.980397 | 0.987275 | -7.04211 |
| ARF3         | -0.00322 | 7.720496 | -0.02457 | 0.980421 | 0.987275 | -7.10789 |
| CXCR2        | 0.016322 | 0.640223 | 0.024173 | 0.980739 | 0.987524 | -6.22533 |
| RFTN1        | 0.007563 | 4.297508 | 0.024002 | 0.980875 | 0.98759  | -6.93866 |
| SEC61A1      | 0.003691 | 8.587047 | 0.023809 | 0.981029 | 0.987674 | -7.08089 |
| ASPHD1       | 0.015769 | 1.704664 | 0.023531 | 0.98125  | 0.987754 | -6.39336 |
| ARL8A        | 0.003671 | 5.608302 | 0.023616 | 0.981183 | 0.987754 | -7.08791 |
| TRAM1        | 0.003933 | 7.72927  | 0.023429 | 0.981332 | 0.987765 | -7.10782 |
| ZNF343       | -0.00335 | 3.821386 | -0.02316 | 0.981549 | 0.987913 | -6.84494 |
| PCDHB16      | 0.010664 | 2.279326 | 0.022822 | 0.981815 | 0.988109 | -6.50757 |
| ZNF326       | -0.00346 | 4.95989  | -0.02273 | 0.981888 | 0.988112 | -7.02793 |
| PARS2        | 0.003874 | 2.799126 | 0.02247  | 0.982096 | 0.988178 | -6.61062 |
| COQ5         | -0.00353 | 3.941498 | -0.02248 | 0.982086 | 0.988178 | -6.86933 |
| EML3         | 0.003317 | 5.417679 | 0.022138 | 0.98236  | 0.988373 | -7.07289 |
| PKDREJ       | -0.00745 | 0.263133 | -0.02204 | 0.982438 | 0.98838  | -6.16744 |
| HAX1         | -0.00317 | 6.03693  | -0.02194 | 0.982515 | 0.988386 | -7.11209 |
| C15orf29     | -0.00384 | 4.246183 | -0.02164 | 0.982755 | 0.988485 | -6.93007 |
| CCDC57       | -0.00449 | 4.478477 | -0.02165 | 0.982751 | 0.988485 | -6.96596 |
| TNFSF4       | 0.00831  | 1.245713 | 0.021364 | 0.982976 | 0.988606 | -6.32421 |
| WIPF2        | 0.004356 | 6.524717 | 0.021315 | 0.983016 | 0.988606 | -7.12418 |
| EPN2         | 0.004599 | 5.934154 | 0.021185 | 0.983119 | 0.988638 | -7.10747 |
| PIGM         | 0.004002 | 4.416315 | 0.020922 | 0.983329 | 0.988778 | -6.95602 |
| ROBO3        | -0.0079  | 1.355702 | -0.02016 | 0.983937 | 0.989078 | -6.3448  |
| RPL41        | -0.00361 | 9.084542 | -0.02037 | 0.98377  | 0.989078 | -7.06305 |
| LAMP1        | 0.003717 | 8.408614 | 0.020111 | 0.983975 | 0.989078 | -7.08729 |
| ZRANB2       | -0.003   | 5.911969 | -0.02028 | 0.983843 | 0.989078 | -7.10659 |
| NGRN         | -0.00332 | 6.356443 | -0.02006 | 0.984016 | 0.989078 | -7.1217  |
| PPIF         | -0.00495 | 6.963117 | -0.02001 | 0.984052 | 0.989078 | -7.12306 |
| LOC143666    | 0.005804 | 0.061235 | 0.019173 | 0.984722 | 0.989681 | -6.13568 |
| ZFYVE19      | 0.002879 | 4.073209 | 0.018967 | 0.984886 | 0.989774 | -6.896   |
| LRCH3        | -0.0035  | 4.518261 | -0.01883 | 0.984999 | 0.989817 | -6.97255 |
| CALHM2       | -0.00501 | 3.436853 | -0.01865 | 0.985141 | 0.989888 | -6.76002 |
| CLCF1        | 0.006356 | 2.983731 | 0.018015 | 0.985645 | 0.990252 | -6.65462 |
| MAP4K2       | -0.00423 | 4.385736 | -0.01802 | 0.985639 | 0.990252 | -6.95239 |
| FBXL2        | -0.0057  | 1.687076 | -0.01727 | 0.986241 | 0.990779 | -6.40168 |
| EGFL7        | -0.00522 | 3.8607   | -0.01707 | 0.986397 | 0.990793 | -6.85371 |
| AACS         | -0.00388 | 5.547155 | -0.01709 | 0.986382 | 0.990793 | -7.08392 |
| NMRAL1       | 0.003356 | 4.726107 | 0.016701 | 0.986692 | 0.991018 | -6.99846 |
| PRELID2      | -0.00527 | 2.02108  | -0.0163  | 0.987015 | 0.991234 | -6.45654 |
| HDAC7        | 0.002406 | 6.232195 | 0.016254 | 0.987048 | 0.991234 | -7.11868 |
| MICALL2      | -0.00409 | 5.332153 | -0.01515 | 0.987928 | 0.992046 | -7.06554 |
| CCDC88A      | -0.00446 | 5.742951 | -0.01504 | 0.988019 | 0.992066 | -7.09755 |
| SLC2A8       | 0.003504 | 3.697692 | 0.014869 | 0.988152 | 0.992128 | -6.8143  |
| DOM3Z        | 0.002669 | 3.619324 | 0.014504 | 0.988443 | 0.992349 | -6.79654 |
| ZNF174       | 0.001938 | 3.22127  | 0.014151 | 0.988724 | 0.99256  | -6.70782 |
| DDX59        | -0.00233 | 3.790804 | -0.01394 | 0.988894 | 0.992659 | -6.83886 |

|           |          |          |          |          |          |          |
|-----------|----------|----------|----------|----------|----------|----------|
| ZNF711    | -0.00677 | 3.19481  | -0.0137  | 0.989083 | 0.992778 | -6.7009  |
| TRIM56    | -0.00273 | 5.405743 | -0.01328 | 0.989415 | 0.992968 | -7.07239 |
| CFLAR     | -0.00288 | 6.020141 | -0.01333 | 0.989382 | 0.992968 | -7.11153 |
| TMEM185A  | -0.00263 | 4.505627 | -0.01313 | 0.989534 | 0.993016 | -6.97148 |
| TBC1D3B   | -0.0037  | 2.761069 | -0.01294 | 0.989688 | 0.993099 | -6.60364 |
| DYNCL1L1  | -0.00203 | 5.057123 | -0.01271 | 0.989872 | 0.993213 | -7.0387  |
| RPL23A    | -0.00239 | 7.522358 | -0.0126  | 0.989963 | 0.993233 | -7.11275 |
| IRF8      | 0.007433 | 3.670434 | 0.012162 | 0.990309 | 0.993508 | -6.8069  |
| APOL4     | 0.004946 | 2.899508 | 0.011882 | 0.990532 | 0.993661 | -6.63537 |
| DENND1B   | -0.00286 | 2.980223 | -0.01169 | 0.990684 | 0.993742 | -6.65154 |
| SDHC      | 0.001696 | 5.821954 | 0.011401 | 0.990915 | 0.993903 | -7.10186 |
| TRAPPC6A  | 0.003171 | 2.960226 | 0.01123  | 0.991051 | 0.993968 | -6.64662 |
| BLZF1     | 0.002045 | 5.081427 | 0.01102  | 0.991219 | 0.994064 | -7.04072 |
| DNAH14    | -0.00747 | 0.798851 | -0.01083 | 0.991368 | 0.994072 | -6.25088 |
| MESDC1    | 0.001966 | 5.913638 | 0.010871 | 0.991337 | 0.994072 | -7.1066  |
| AFG3L1    | 0.001819 | 4.060902 | 0.010375 | 0.991733 | 0.994366 | -6.89433 |
| ELMO1     | -0.00398 | 4.280585 | -0.01003 | 0.992005 | 0.994568 | -6.93794 |
| ATP8B4    | 0.003724 | 0.743271 | 0.009578 | 0.992368 | 0.99486  | -6.24106 |
| ARSE      | 0.009042 | 1.053015 | 0.009274 | 0.99261  | 0.994933 | -6.28495 |
| BANK1     | -0.00533 | 1.343501 | -0.00934 | 0.992561 | 0.994933 | -6.34294 |
| PRAF2     | -0.00256 | 4.276714 | -0.00922 | 0.992655 | 0.994933 | -6.93647 |
| ERP44     | -0.00132 | 6.618291 | -0.00895 | 0.992866 | 0.995073 | -7.12517 |
| TMEM92    | -0.00553 | 2.182837 | -0.00841 | 0.993297 | 0.995424 | -6.47983 |
| ANKH      | 0.002075 | 6.1508   | 0.008335 | 0.993358 | 0.995424 | -7.11629 |
| SLC6A9    | 0.002622 | 4.714881 | 0.008021 | 0.993608 | 0.995604 | -6.99872 |
| LOC729991 | -0.0012  | 3.272484 | -0.00792 | 0.993685 | 0.995609 | -6.71851 |
| MAGT1     | -0.0012  | 6.694016 | -0.00716 | 0.994291 | 0.996145 | -7.12534 |
| PPIL3     | 0.001199 | 3.586249 | 0.006785 | 0.994593 | 0.996376 | -6.79025 |
| CSDAP1    | 0.001781 | 2.584284 | 0.0059   | 0.995298 | 0.996939 | -6.57    |
| POC1B     | -0.00142 | 4.633515 | -0.00596 | 0.995252 | 0.996939 | -6.98718 |
| SCFD1     | -0.00075 | 5.393235 | -0.00528 | 0.995795 | 0.997366 | -7.0712  |
| TMEM205   | 0.001047 | 4.961136 | 0.005153 | 0.995894 | 0.997393 | -7.0276  |
| SOX6      | -0.00246 | 2.543227 | -0.00473 | 0.996233 | 0.997661 | -6.55714 |
| POM121    | -0.00056 | 7.584843 | -0.00373 | 0.997031 | 0.998389 | -7.11144 |
| GOLGA8A   | -0.00102 | 5.603565 | -0.00343 | 0.997268 | 0.998523 | -7.08809 |
| AHNAK2    | 0.002387 | 7.515298 | 0.003378 | 0.997308 | 0.998523 | -7.11312 |
| GNG5      | -0.00057 | 6.243075 | -0.00325 | 0.997406 | 0.99855  | -7.11913 |
| SOX18     | -0.001   | 4.003458 | -0.00314 | 0.997496 | 0.998568 | -6.88493 |
| ASXL2     | -0.00068 | 5.774734 | -0.00297 | 0.99763  | 0.998605 | -7.09944 |
| ANKRD52   | -0.00054 | 6.71802  | -0.00292 | 0.997676 | 0.998605 | -7.12536 |
| GGA3      | -0.00039 | 5.681712 | -0.00252 | 0.997995 | 0.998852 | -7.09351 |
| KLHL28    | 0.000368 | 4.67421  | 0.002171 | 0.99827  | 0.999056 | -6.99284 |
| ERCC6     | -0.00036 | 4.169941 | -0.00178 | 0.998579 | 0.999151 | -6.91543 |
| ALG2      | 0.000267 | 5.13445  | 0.001799 | 0.998566 | 0.999151 | -7.04608 |
| SSH3      | 0.000445 | 6.07329  | 0.001804 | 0.998562 | 0.999151 | -7.11368 |
| RLF       | -0.00035 | 5.43416  | -0.00163 | 0.998699 | 0.9992   | -7.07502 |
| AGTPBP1   | 0.000297 | 4.453951 | 0.001431 | 0.998859 | 0.999288 | -6.96284 |
| TMEM231   | 0.000337 | 2.183723 | 0.001021 | 0.999187 | 0.999473 | -6.49167 |
| ZNF691    | -0.00016 | 2.783816 | -0.00103 | 0.999178 | 0.999473 | -6.61004 |
| SESN3     | -0.00046 | 3.284439 | -0.00076 | 0.999391 | 0.999605 | -6.72734 |
| CCT6P1    | #####    | 2.190213 | -0.00046 | 0.999631 | 0.999774 | -6.49118 |
| SS18L1    | 5.61E-05 | 4.613859 | 0.000327 | 0.99974  | 0.999811 | -6.98497 |
| ZNF768    | #####    | 5.092167 | #####    | 0.999932 | 0.999932 | -7.04218 |
