# Supplementary figures and images for: Novel lncRNA Panel as for Prognosis in Esophageal Squamous Cell Carcinoma Based on ceRNA Network Mechanism
Source: Hindawi journal article supplement (doi:10.1155/2021/8020879), 2021-09-24

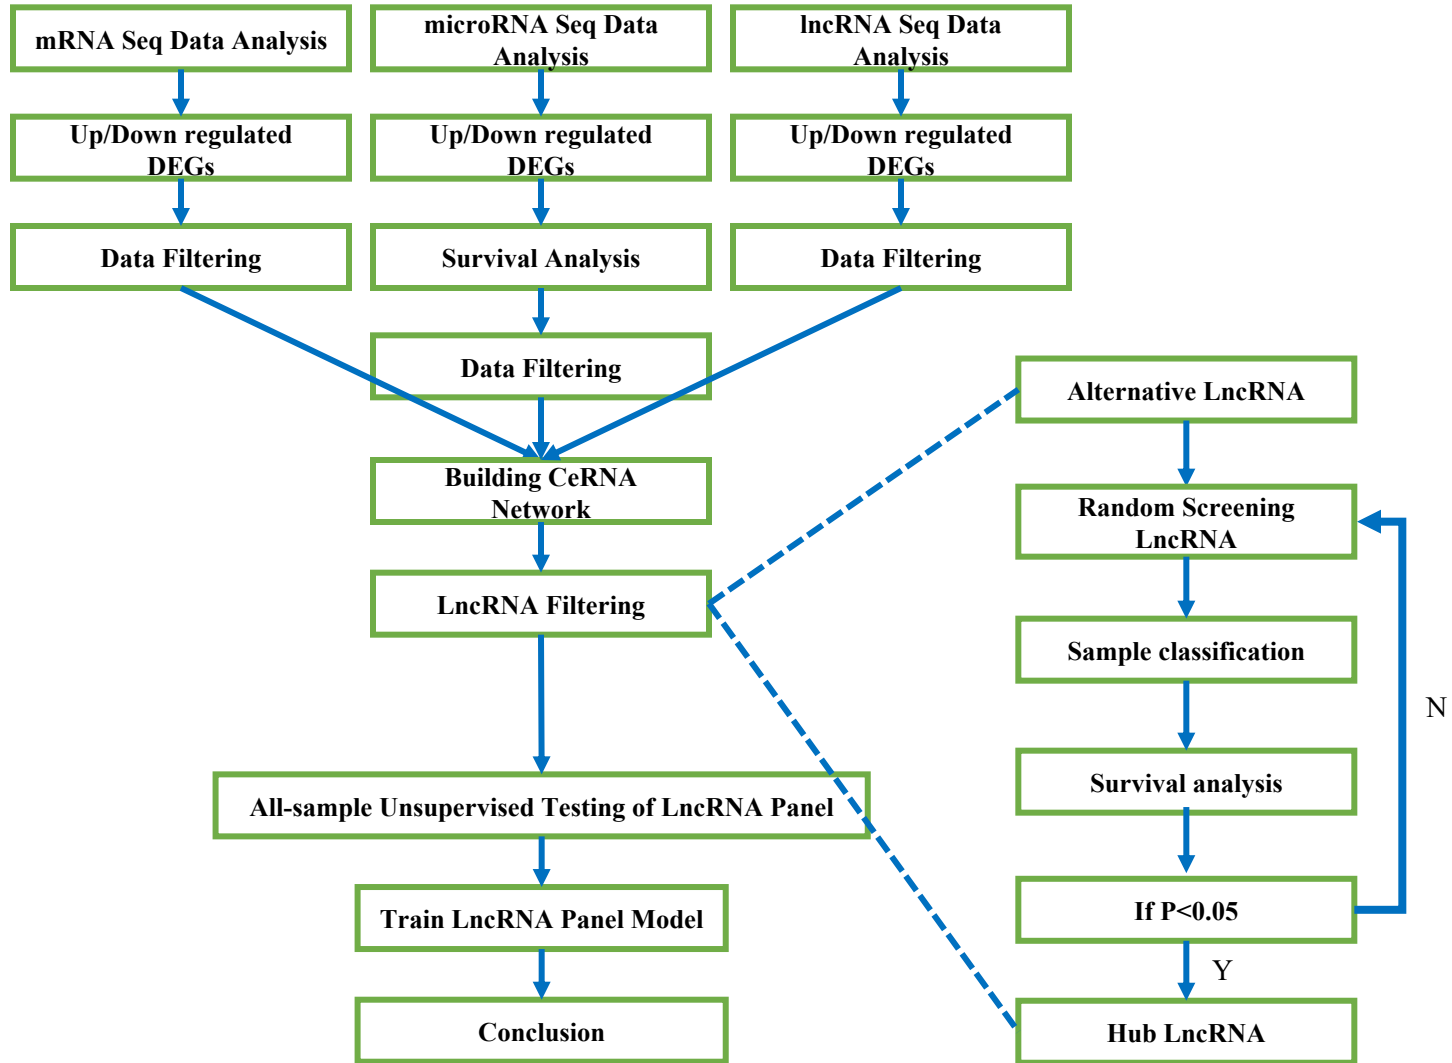

Supplement: f1 [file 8020879.f1.zip]
